# Supplementary material for: A hierarchical pathway for assembly of the distal appendages that organize primary cilia
Source: eLife journal article supplement (doi:10.7554/elife.85999), 2025-01-30

Figure 1-figure supplement 2B\_CEP83

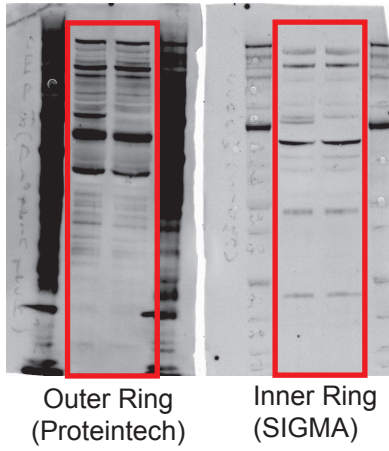

Figure 2-figure supplement 1A\_CEP164

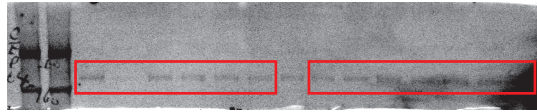

Figure 2-figure supplement 1A\_CEP89

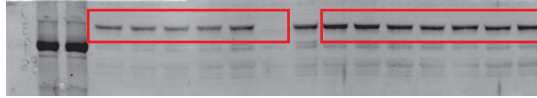

Figure 2-figure supplement 1A\_CEP83

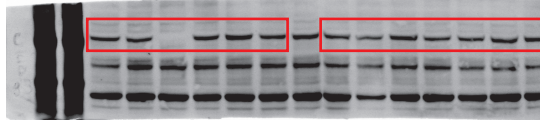

Figure 2-figure supplement 1A\_ANKRD26

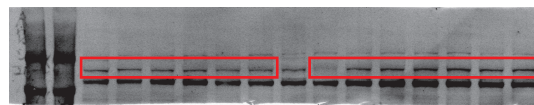

Figure 2-figure supplement 1A\_KIZ

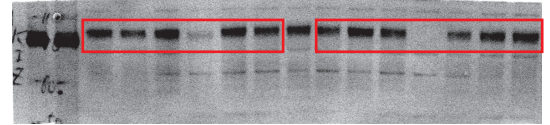

Figure 2-figure supplement 1A\_NCS1

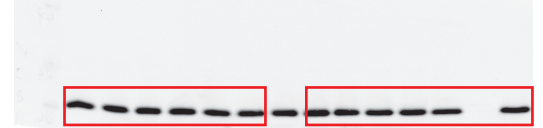

Figure 2-figure supplement 1A\_SCLT1

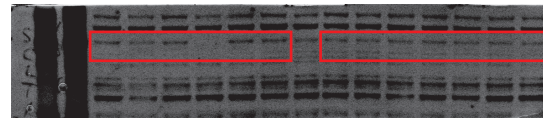

Figure 2-figure supplement 1A\_IFT88

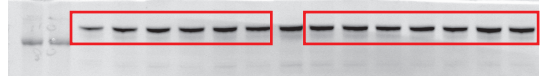

Figure 4-figure supplement 1A\_RAB34

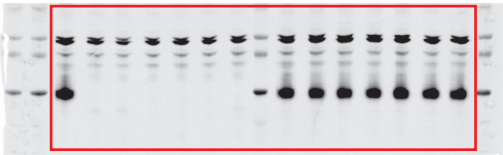

Figure 4-figure supplement 1A\_MYO5A

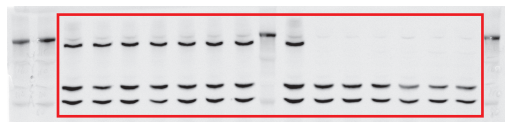

Figure 4-figure supplement 1A\_Tubulin

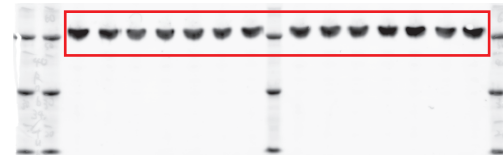

Figure 4-figure supplement 2A\_IFT52

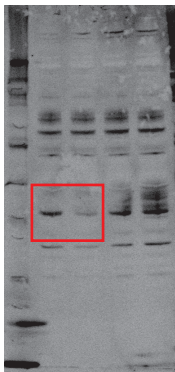

Figure 4-figure supplement 2A\_Tubulin

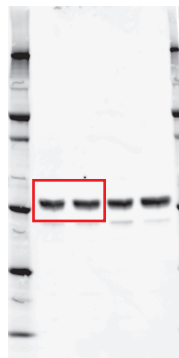

Supplement: data3 [file elife-85999-data3-v2.pdf]
