# Supplementary material for: A hierarchical pathway for assembly of the distal appendages that organize primary cilia
Source: eLife journal article supplement (doi:10.7554/elife.85999), 2025-01-30

Figure 2-figure supplement 2A\_CEP164

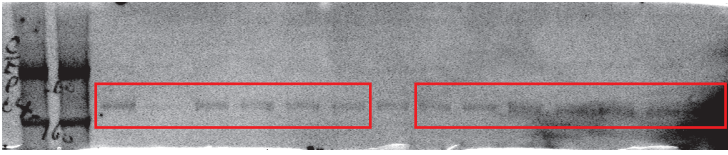

Figure 2-figure supplement 2A\_CEP89

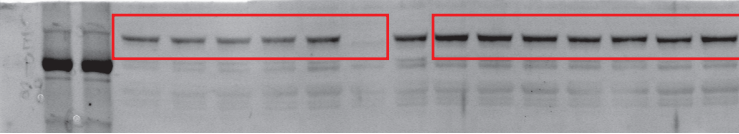

Figure 2-figure supplement 2A\_CEP83

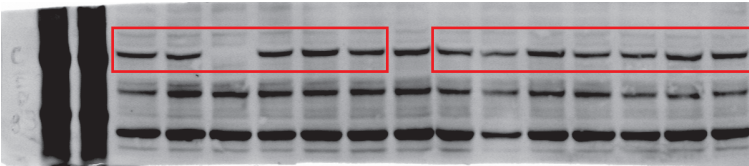

Figure 2-figure supplement 2A\_ANKRD26

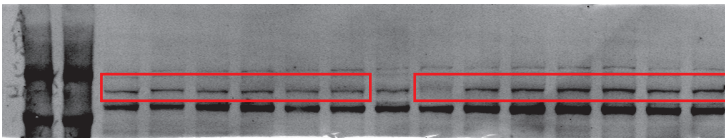

Figure 2-figure supplement 2A\_KIZ

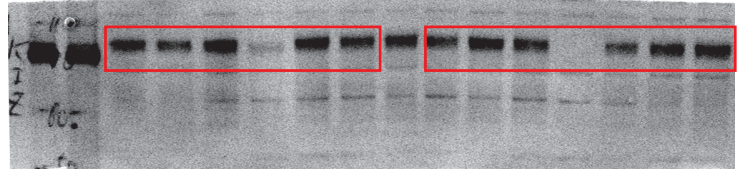

Figure 2-figure supplement 2A\_NCS1

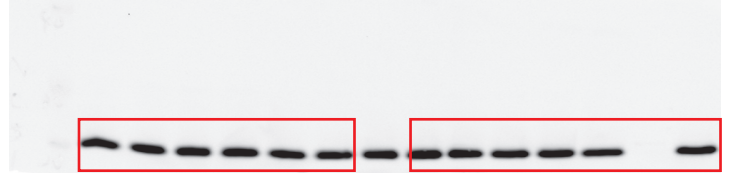

Figure 2-figure supplement 2A\_SCLT1

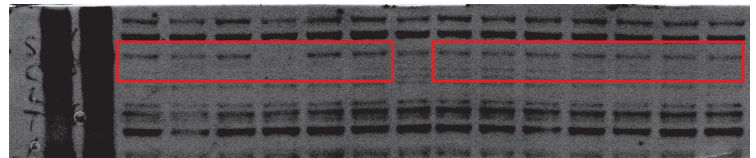

Figure 2-figure supplement 2A\_IFT88

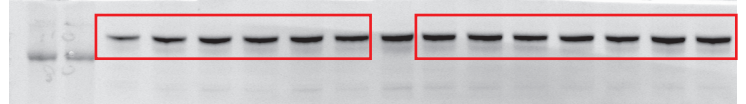

Supplement: fig2-figsupp2-data1 [file elife-85999-fig2-figsupp2-data1-v2.zip]
