# Supplementary material for: A hierarchical pathway for assembly of the distal appendages that organize primary cilia
Source: eLife journal article supplement (doi:10.7554/elife.85999), 2025-01-30

Figure 4-figure supplement 1A\_RAB34

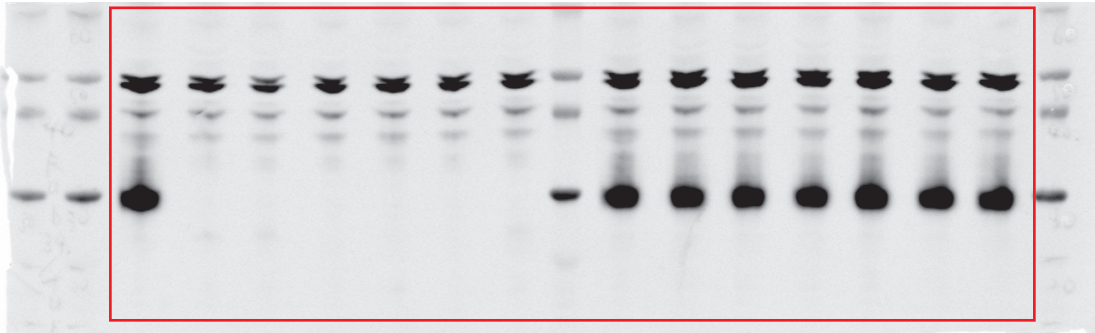

Figure 4-figure supplement 1A\_MYO5A

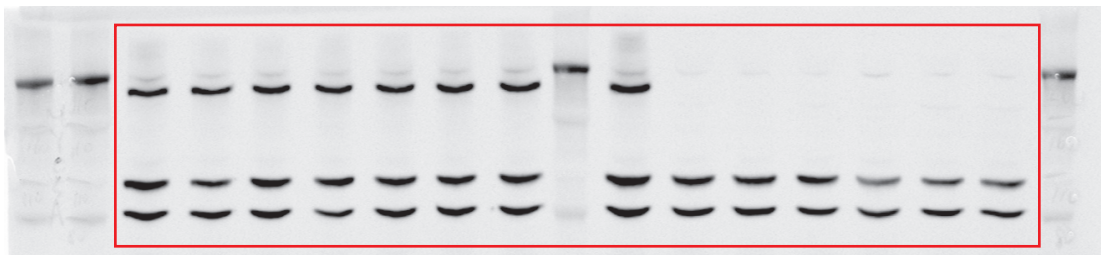

Figure 4-figure supplement 1A\_Tubulin

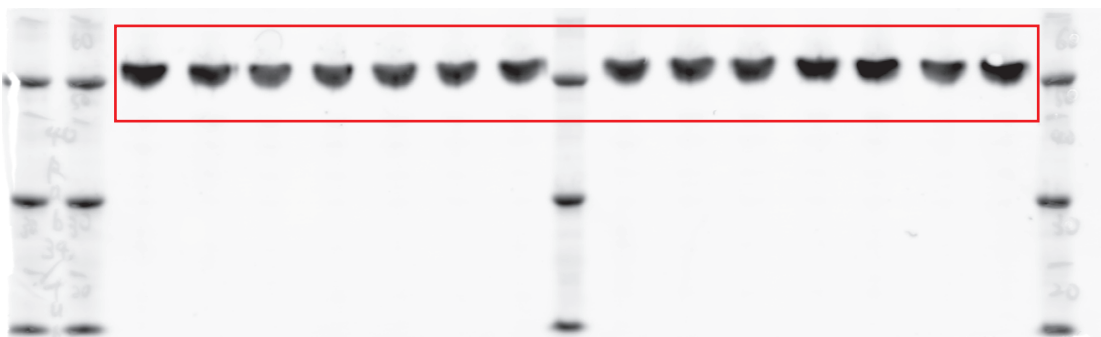

Supplement: fig4-figsupp1-data2 [file elife-85999-fig4-figsupp1-data2-v2.pdf]
