# Supplementary material for: A hierarchical pathway for assembly of the distal appendages that organize primary cilia
Source: eLife. 2025 Jan 30;14:e85999. doi: 10.7554/eLife.85999 (PMC11984956; doi:10.7554/eLife.85999)
Supplement: Figure 1—figure supplement 4—source data 1. [file elife-85999-fig1-figsupp4-data1.xlsx]

## Sheet: CEP83-GFP with Ab (Figure 1B)
No.	Name	Value	Type	Marker	Figure
Cell 1							CEP164						Diameter (µm)
1	Coverslip2669-013_Reconstructed_crop.nd2	0.483	Length [µm]	CEP164	Figure 1B		Cell1	Coverslip2669-013	0.483	0.459	0.492	0.479	0.47825
2	Coverslip2669-013_Reconstructed_crop.nd2	0.459	Length [µm]	CEP164	Figure 1B		Cell2	Coverslip2669-015	0.429	0.446	0.45	0.461	0.4465
3	Coverslip2669-013_Reconstructed_crop.nd2	0.492	Length [µm]	CEP164	Figure 1B		Cell3	Coverslip2669-016	0.47	0.44	0.478	0.464	0.463
4	Coverslip2669-013_Reconstructed_crop.nd2	0.479	Length [µm]	CEP164	Figure 1B		Cell4	Coverslip2669-017	0.544	0.514	0.534	0.53	0.5305
5	Coverslip2669-013_Reconstructed_crop.nd2	0.319	Length [µm]	CEP83-GFP	Figure 1B		Cell5	Coverslip2669-018	0.505	0.522	0.5	0.499	0.5065
6	Coverslip2669-013_Reconstructed_crop.nd2	0.299	Length [µm]	CEP83-GFP	Figure 1B		Cell6	Coverslip2669-021	0.482	0.454	0.481	0.474	0.47275
7	Coverslip2669-013_Reconstructed_crop.nd2	0.323	Length [µm]	CEP83-GFP	Figure 1B		Cell7	Coverslip2669-022	0.48	0.503	0.527	0.523	0.50825
8	Coverslip2669-013_Reconstructed_crop.nd2	0.304	Length [µm]	CEP83-GFP	Figure 1B		Cell8	Coverslip2669-023	0.481	0.486	0.477	0.498	0.4855
Cell 2							Cell9	Coverslip2669-024	0.451	0.496	0.531	0.493	0.49275
1	Coverslip2669-015_Reconstructed_crop.nd2	0.429	Length [µm]	CEP164	Figure 1B		Cell10	Coverslip2669-025	0.469	0.477	0.5	0.533	0.49475
2	Coverslip2669-015_Reconstructed_crop.nd2	0.446	Length [µm]	CEP164	Figure 1B		Cell11	Coverslip2669-026	0.487	0.474	0.514	0.495	0.4925
3	Coverslip2669-015_Reconstructed_crop.nd2	0.45	Length [µm]	CEP164	Figure 1B		Cell12	Coverslip2669-027	0.49	0.494	0.493	0.481	0.4895
4	Coverslip2669-015_Reconstructed_crop.nd2	0.461	Length [µm]	CEP164	Figure 1B		Cell13	Coverslip2669-029	0.445	0.46	0.47	0.45	0.45625
5	Coverslip2669-015_Reconstructed_crop.nd2	0.346	Length [µm]	CEP83-GFP	Figure 1B		Average						0.485923
6	Coverslip2669-015_Reconstructed_crop.nd2	0.325	Length [µm]	CEP83-GFP	Figure 1B
7	Coverslip2669-015_Reconstructed_crop.nd2	0.347	Length [µm]	CEP83-GFP	Figure 1B
8	Coverslip2669-015_Reconstructed_crop.nd2	0.353	Length [µm]	CEP83-GFP	Figure 1B		CEP83-GFP						Diameter (µm)
Cell 3							Cell1	Coverslip2669-013	0.319	0.299	0.323	0.304	0.31125
1	Coverslip2669-016_Reconstructed_crop.nd2	0.47	Length [µm]	CEP164	Figure 1B		Cell2	Coverslip2669-015	0.346	0.325	0.347	0.353	0.34275
2	Coverslip2669-016_Reconstructed_crop.nd2	0.44	Length [µm]	CEP164	Figure 1B		Cell3	Coverslip2669-016	0.321	0.304	0.335	0.322	0.3205
3	Coverslip2669-016_Reconstructed_crop.nd2	0.478	Length [µm]	CEP164	Figure 1B		Cell4	Coverslip2669-017	0.374	0.328	0.337	0.353	0.348
4	Coverslip2669-016_Reconstructed_crop.nd2	0.464	Length [µm]	CEP164	Figure 1B		Cell5	Coverslip2669-018	0.369	0.351	0.399	0.375	0.3735
5	Coverslip2669-016_Reconstructed_crop.nd2	0.321	Length [µm]	CEP83-GFP	Figure 1B		Cell6	Coverslip2669-021	0.321	0.309	0.355	0.382	0.34175
6	Coverslip2669-016_Reconstructed_crop.nd2	0.304	Length [µm]	CEP83-GFP	Figure 1B		Cell7	Coverslip2669-022	0.385	0.333	0.367	0.383	0.367
7	Coverslip2669-016_Reconstructed_crop.nd2	0.335	Length [µm]	CEP83-GFP	Figure 1B		Cell8	Coverslip2669-023	0.336	0.327	0.319	0.326	0.327
8	Coverslip2669-016_Reconstructed_crop.nd2	0.322	Length [µm]	CEP83-GFP	Figure 1B		Cell9	Coverslip2669-024	0.321	0.319	0.336	0.351	0.33175
Cell 4							Cell10	Coverslip2669-025	0.334	0.331	0.342	0.328	0.33375
1	Coverslip2669-017_Reconstructed_crop.nd2	0.544	Length [µm]	CEP164	Figure 1B		Cell11	Coverslip2669-026	0.322	0.319	0.354	0.361	0.339
2	Coverslip2669-017_Reconstructed_crop.nd2	0.514	Length [µm]	CEP164	Figure 1B		Cell12	Coverslip2669-027	0.337	0.333	0.346	0.336	0.338
3	Coverslip2669-017_Reconstructed_crop.nd2	0.534	Length [µm]	CEP164	Figure 1B		Cell13	Coverslip2669-029	0.319	0.34	0.319	0.353	0.33275
4	Coverslip2669-017_Reconstructed_crop.nd2	0.53	Length [µm]	CEP164	Figure 1B								0.339
5	Coverslip2669-017_Reconstructed_crop.nd2	0.374	Length [µm]	CEP83-GFP	Figure 1B
6	Coverslip2669-017_Reconstructed_crop.nd2	0.328	Length [µm]	CEP83-GFP	Figure 1B
7	Coverslip2669-017_Reconstructed_crop.nd2	0.337	Length [µm]	CEP83-GFP	Figure 1B
8	Coverslip2669-017_Reconstructed_crop.nd2	0.353	Length [µm]	CEP83-GFP	Figure 1B
Cell 5
1	Coverslip2669-018_Reconstructed_crop.nd2	0.505	Length [µm]	CEP164	Figure 1B
2	Coverslip2669-018_Reconstructed_crop.nd2	0.522	Length [µm]	CEP164	Figure 1B
3	Coverslip2669-018_Reconstructed_crop.nd2	0.5	Length [µm]	CEP164	Figure 1B
4	Coverslip2669-018_Reconstructed_crop.nd2	0.499	Length [µm]	CEP164	Figure 1B
5	Coverslip2669-018_Reconstructed_crop.nd2	0.369	Length [µm]	CEP83-GFP	Figure 1B
6	Coverslip2669-018_Reconstructed_crop.nd2	0.351	Length [µm]	CEP83-GFP	Figure 1B
7	Coverslip2669-018_Reconstructed_crop.nd2	0.399	Length [µm]	CEP83-GFP	Figure 1B
8	Coverslip2669-018_Reconstructed_crop.nd2	0.375	Length [µm]	CEP83-GFP	Figure 1B
Cell 6
1	Coverslip2669-021_Reconstructed_crop.nd2	0.482	Length [µm]	CEP164	Figure 1B
2	Coverslip2669-021_Reconstructed_crop.nd2	0.454	Length [µm]	CEP164	Figure 1B
3	Coverslip2669-021_Reconstructed_crop.nd2	0.481	Length [µm]	CEP164	Figure 1B
4	Coverslip2669-021_Reconstructed_crop.nd2	0.474	Length [µm]	CEP164	Figure 1B
5	Coverslip2669-021_Reconstructed_crop.nd2	0.321	Length [µm]	CEP83-GFP	Figure 1B
6	Coverslip2669-021_Reconstructed_crop.nd2	0.309	Length [µm]	CEP83-GFP	Figure 1B
7	Coverslip2669-021_Reconstructed_crop.nd2	0.355	Length [µm]	CEP83-GFP	Figure 1B
8	Coverslip2669-021_Reconstructed_crop.nd2	0.382	Length [µm]	CEP83-GFP	Figure 1B
Cell 7
1	Coverslip2669-022_Reconstructed_crop.nd2	0.48	Length [µm]	CEP164	Figure 1B
2	Coverslip2669-022_Reconstructed_crop.nd2	0.503	Length [µm]	CEP164	Figure 1B
3	Coverslip2669-022_Reconstructed_crop.nd2	0.527	Length [µm]	CEP164	Figure 1B
4	Coverslip2669-022_Reconstructed_crop.nd2	0.523	Length [µm]	CEP164	Figure 1B
5	Coverslip2669-022_Reconstructed_crop.nd2	0.385	Length [µm]	CEP83-GFP	Figure 1B
6	Coverslip2669-022_Reconstructed_crop.nd2	0.333	Length [µm]	CEP83-GFP	Figure 1B
7	Coverslip2669-022_Reconstructed_crop.nd2	0.367	Length [µm]	CEP83-GFP	Figure 1B
8	Coverslip2669-022_Reconstructed_crop.nd2	0.383	Length [µm]	CEP83-GFP	Figure 1B
Cell 8
1	Coverslip2669-023_Reconstructed_crop.nd2	0.481	Length [µm]	CEP164	Figure 1B
2	Coverslip2669-023_Reconstructed_crop.nd2	0.486	Length [µm]	CEP164	Figure 1B
3	Coverslip2669-023_Reconstructed_crop.nd2	0.477	Length [µm]	CEP164	Figure 1B
4	Coverslip2669-023_Reconstructed_crop.nd2	0.498	Length [µm]	CEP164	Figure 1B
5	Coverslip2669-023_Reconstructed_crop.nd2	0.336	Length [µm]	CEP83-GFP	Figure 1B
6	Coverslip2669-023_Reconstructed_crop.nd2	0.327	Length [µm]	CEP83-GFP	Figure 1B
7	Coverslip2669-023_Reconstructed_crop.nd2	0.319	Length [µm]	CEP83-GFP	Figure 1B
8	Coverslip2669-023_Reconstructed_crop.nd2	0.326	Length [µm]	CEP83-GFP	Figure 1B
Cell 9
1	Coverslip2669-024_Reconstructed_crop.nd2	0.451	Length [µm]	CEP164	Figure 1B
2	Coverslip2669-024_Reconstructed_crop.nd2	0.496	Length [µm]	CEP164	Figure 1B
3	Coverslip2669-024_Reconstructed_crop.nd2	0.531	Length [µm]	CEP164	Figure 1B
4	Coverslip2669-024_Reconstructed_crop.nd2	0.493	Length [µm]	CEP164	Figure 1B
5	Coverslip2669-024_Reconstructed_crop.nd2	0.321	Length [µm]	CEP83-GFP	Figure 1B
6	Coverslip2669-024_Reconstructed_crop.nd2	0.319	Length [µm]	CEP83-GFP	Figure 1B
7	Coverslip2669-024_Reconstructed_crop.nd2	0.336	Length [µm]	CEP83-GFP	Figure 1B
8	Coverslip2669-024_Reconstructed_crop.nd2	0.351	Length [µm]	CEP83-GFP	Figure 1B
Cell 10
1	Coverslip2669-025_Reconstructed_crop.nd2	0.469	Length [µm]	CEP164	Figure 1B
2	Coverslip2669-025_Reconstructed_crop.nd2	0.477	Length [µm]	CEP164	Figure 1B
3	Coverslip2669-025_Reconstructed_crop.nd2	0.5	Length [µm]	CEP164	Figure 1B
4	Coverslip2669-025_Reconstructed_crop.nd2	0.533	Length [µm]	CEP164	Figure 1B
5	Coverslip2669-025_Reconstructed_crop.nd2	0.334	Length [µm]	CEP83-GFP	Figure 1B
6	Coverslip2669-025_Reconstructed_crop.nd2	0.331	Length [µm]	CEP83-GFP	Figure 1B
7	Coverslip2669-025_Reconstructed_crop.nd2	0.342	Length [µm]	CEP83-GFP	Figure 1B
8	Coverslip2669-025_Reconstructed_crop.nd2	0.328	Length [µm]	CEP83-GFP	Figure 1B
Cell 11
1	Coverslip2669-026_Reconstructed_crop.nd2	0.487	Length [µm]	CEP164	Figure 1B
2	Coverslip2669-026_Reconstructed_crop.nd2	0.474	Length [µm]	CEP164	Figure 1B
3	Coverslip2669-026_Reconstructed_crop.nd2	0.514	Length [µm]	CEP164	Figure 1B
4	Coverslip2669-026_Reconstructed_crop.nd2	0.495	Length [µm]	CEP164	Figure 1B
5	Coverslip2669-026_Reconstructed_crop.nd2	0.322	Length [µm]	CEP83-GFP	Figure 1B
6	Coverslip2669-026_Reconstructed_crop.nd2	0.319	Length [µm]	CEP83-GFP	Figure 1B
7	Coverslip2669-026_Reconstructed_crop.nd2	0.354	Length [µm]	CEP83-GFP	Figure 1B
8	Coverslip2669-026_Reconstructed_crop.nd2	0.361	Length [µm]	CEP83-GFP	Figure 1B
Cell 12
1	Coverslip2669-027_Reconstructed_crop.nd2	0.49	Length [µm]	CEP164	Figure 1B
2	Coverslip2669-027_Reconstructed_crop.nd2	0.494	Length [µm]	CEP164	Figure 1B
3	Coverslip2669-027_Reconstructed_crop.nd2	0.493	Length [µm]	CEP164	Figure 1B
4	Coverslip2669-027_Reconstructed_crop.nd2	0.481	Length [µm]	CEP164	Figure 1B
5	Coverslip2669-027_Reconstructed_crop.nd2	0.337	Length [µm]	CEP83-GFP	Figure 1B
6	Coverslip2669-027_Reconstructed_crop.nd2	0.333	Length [µm]	CEP83-GFP	Figure 1B
7	Coverslip2669-027_Reconstructed_crop.nd2	0.346	Length [µm]	CEP83-GFP	Figure 1B
8	Coverslip2669-027_Reconstructed_crop.nd2	0.336	Length [µm]	CEP83-GFP	Figure 1B
Cell 13
1	Coverslip2669-029_Reconstructed_crop.nd2	0.445	Length [µm]	CEP164	Figure 1B
2	Coverslip2669-029_Reconstructed_crop.nd2	0.46	Length [µm]	CEP164	Figure 1B
3	Coverslip2669-029_Reconstructed_crop.nd2	0.47	Length [µm]	CEP164	Figure 1B
4	Coverslip2669-029_Reconstructed_crop.nd2	0.45	Length [µm]	CEP164	Figure 1B
5	Coverslip2669-029_Reconstructed_crop.nd2	0.319	Length [µm]	CEP83-GFP	Figure 1B
6	Coverslip2669-029_Reconstructed_crop.nd2	0.34	Length [µm]	CEP83-GFP	Figure 1B
7	Coverslip2669-029_Reconstructed_crop.nd2	0.319	Length [µm]	CEP83-GFP	Figure 1B
8	Coverslip2669-029_Reconstructed_crop.nd2	0.353	Length [µm]	CEP83-GFP	Figure 1B
1	Coverslip2670-011_Reconstructed_crop.nd2	0.426	Length [µm]
2	Coverslip2670-011_Reconstructed_crop.nd2	0.436	Length [µm]
3	Coverslip2670-011_Reconstructed_crop.nd2	0.479	Length [µm]
4	Coverslip2670-011_Reconstructed_crop.nd2	0.449	Length [µm]
5	Coverslip2670-011_Reconstructed_crop.nd2	0.4	Length [µm]
6	Coverslip2670-011_Reconstructed_crop.nd2	0.399	Length [µm]
7	Coverslip2670-011_Reconstructed_crop.nd2	0.385	Length [µm]
8	Coverslip2670-011_Reconstructed_crop.nd2	0.389	Length [µm]
1	Coverslip2670-012_Reconstructed_crop.nd2	0.496	Length [µm]
2	Coverslip2670-012_Reconstructed_crop.nd2	0.454	Length [µm]
3	Coverslip2670-012_Reconstructed_crop.nd2	0.491	Length [µm]
4	Coverslip2670-012_Reconstructed_crop.nd2	0.453	Length [µm]
5	Coverslip2670-012_Reconstructed_crop.nd2	0.431	Length [µm]
6	Coverslip2670-012_Reconstructed_crop.nd2	0.463	Length [µm]
7	Coverslip2670-012_Reconstructed_crop.nd2	0.449	Length [µm]
8	Coverslip2670-012_Reconstructed_crop.nd2	0.45	Length [µm]
1	Coverslip2670-013_Reconstructed_crop.nd2	0.466	Length [µm]
2	Coverslip2670-013_Reconstructed_crop.nd2	0.448	Length [µm]
3	Coverslip2670-013_Reconstructed_crop.nd2	0.542	Length [µm]
4	Coverslip2670-013_Reconstructed_crop.nd2	0.496	Length [µm]
5	Coverslip2670-013_Reconstructed_crop.nd2	0.414	Length [µm]
6	Coverslip2670-013_Reconstructed_crop.nd2	0.414	Length [µm]
7	Coverslip2670-013_Reconstructed_crop.nd2	0.434	Length [µm]
8	Coverslip2670-013_Reconstructed_crop.nd2	0.446	Length [µm]
1	Coverslip2670-014_Reconstructed_crop.nd2	0.454	Length [µm]
2	Coverslip2670-014_Reconstructed_crop.nd2	0.447	Length [µm]
3	Coverslip2670-014_Reconstructed_crop.nd2	0.458	Length [µm]
4	Coverslip2670-014_Reconstructed_crop.nd2	0.44	Length [µm]
5	Coverslip2670-014_Reconstructed_crop.nd2	0.378	Length [µm]
6	Coverslip2670-014_Reconstructed_crop.nd2	0.434	Length [µm]
7	Coverslip2670-014_Reconstructed_crop.nd2	0.441	Length [µm]
8	Coverslip2670-014_Reconstructed_crop.nd2	0.411	Length [µm]
1	Coverslip2670-015_Reconstructed_crop.nd2	0.402	Length [µm]
2	Coverslip2670-015_Reconstructed_crop.nd2	0.45	Length [µm]
3	Coverslip2670-015_Reconstructed_crop.nd2	0.49	Length [µm]
4	Coverslip2670-015_Reconstructed_crop.nd2	0.446	Length [µm]
5	Coverslip2670-015_Reconstructed_crop.nd2	0.402	Length [µm]
6	Coverslip2670-015_Reconstructed_crop.nd2	0.449	Length [µm]
7	Coverslip2670-015_Reconstructed_crop.nd2	0.414	Length [µm]
8	Coverslip2670-015_Reconstructed_crop.nd2	0.416	Length [µm]
1	Coverslip2670-017_Reconstructed_crop.nd2	0.42	Length [µm]
2	Coverslip2670-017_Reconstructed_crop.nd2	0.427	Length [µm]
3	Coverslip2670-017_Reconstructed_crop.nd2	0.473	Length [µm]
4	Coverslip2670-017_Reconstructed_crop.nd2	0.427	Length [µm]
5	Coverslip2670-017_Reconstructed_crop.nd2	0.43	Length [µm]
6	Coverslip2670-017_Reconstructed_crop.nd2	0.426	Length [µm]
7	Coverslip2670-017_Reconstructed_crop.nd2	0.448	Length [µm]
8	Coverslip2670-017_Reconstructed_crop.nd2	0.463	Length [µm]
1	Coverslip2670-018_Reconstructed_crop.nd2	0.511	Length [µm]
2	Coverslip2670-018_Reconstructed_crop.nd2	0.482	Length [µm]
3	Coverslip2670-018_Reconstructed_crop.nd2	0.506	Length [µm]
4	Coverslip2670-018_Reconstructed_crop.nd2	0.48	Length [µm]
5	Coverslip2670-018_Reconstructed_crop.nd2	0.406	Length [µm]
6	Coverslip2670-018_Reconstructed_crop.nd2	0.444	Length [µm]
7	Coverslip2670-018_Reconstructed_crop.nd2	0.416	Length [µm]
8	Coverslip2670-018_Reconstructed_crop.nd2	0.415	Length [µm]
1	Coverslip2670-019_Reconstructed_crop.nd2	0.465	Length [µm]
2	Coverslip2670-019_Reconstructed_crop.nd2	0.447	Length [µm]
3	Coverslip2670-019_Reconstructed_crop.nd2	0.479	Length [µm]
4	Coverslip2670-019_Reconstructed_crop.nd2	0.479	Length [µm]
5	Coverslip2670-019_Reconstructed_crop.nd2	0.419	Length [µm]
6	Coverslip2670-019_Reconstructed_crop.nd2	0.451	Length [µm]
7	Coverslip2670-019_Reconstructed_crop.nd2	0.417	Length [µm]
8	Coverslip2670-019_Reconstructed_crop.nd2	0.4	Length [µm]
1	Coverslip2670-020_Reconstructed_crop.nd2	0.431	Length [µm]
2	Coverslip2670-020_Reconstructed_crop.nd2	0.45	Length [µm]
3	Coverslip2670-020_Reconstructed_crop.nd2	0.42	Length [µm]
4	Coverslip2670-020_Reconstructed_crop.nd2	0.386	Length [µm]
5	Coverslip2670-020_Reconstructed_crop.nd2	0.414	Length [µm]
6	Coverslip2670-020_Reconstructed_crop.nd2	0.398	Length [µm]
7	Coverslip2670-020_Reconstructed_crop.nd2	0.414	Length [µm]
8	Coverslip2670-020_Reconstructed_crop.nd2	0.429	Length [µm]
1	Coverslip2671-011_Reconstructed_crop.nd2	0.465	Length [µm]
2	Coverslip2671-011_Reconstructed_crop.nd2	0.43	Length [µm]
3	Coverslip2671-011_Reconstructed_crop.nd2	0.447	Length [µm]
4	Coverslip2671-011_Reconstructed_crop.nd2	0.46	Length [µm]
5	Coverslip2671-011_Reconstructed_crop.nd2	0.448	Length [µm]
6	Coverslip2671-011_Reconstructed_crop.nd2	0.447	Length [µm]
7	Coverslip2671-011_Reconstructed_crop.nd2	0.449	Length [µm]
8	Coverslip2671-011_Reconstructed_crop.nd2	0.479	Length [µm]
1	Coverslip2671-014_Reconstructed_crop.nd2	0.416	Length [µm]
2	Coverslip2671-014_Reconstructed_crop.nd2	0.448	Length [µm]
3	Coverslip2671-014_Reconstructed_crop.nd2	0.467	Length [µm]
4	Coverslip2671-014_Reconstructed_crop.nd2	0.443	Length [µm]
5	Coverslip2671-014_Reconstructed_crop.nd2	0.404	Length [µm]
6	Coverslip2671-014_Reconstructed_crop.nd2	0.417	Length [µm]
7	Coverslip2671-014_Reconstructed_crop.nd2	0.437	Length [µm]
8	Coverslip2671-014_Reconstructed_crop.nd2	0.431	Length [µm]

## Sheet: GFP-CEP83 with Ab (Figure 1D)
No.	Name	Value	Type		Figure
Cell 1
1	Coverslip2670-011_Reconstructed_crop.nd2	0.426	Length [µm]	CEP164	Figure 1D			CEP164						Diameter (µm)
2	Coverslip2670-011_Reconstructed_crop.nd2	0.436	Length [µm]	CEP164	Figure 1D			Cell1	Coverslip2670-011	0.426	0.436	0.479	0.449	0.4475
3	Coverslip2670-011_Reconstructed_crop.nd2	0.479	Length [µm]	CEP164	Figure 1D			Cell2	Coverslip2670-012	0.496	0.454	0.491	0.453	0.4735
4	Coverslip2670-011_Reconstructed_crop.nd2	0.449	Length [µm]	CEP164	Figure 1D			Cell3	Coverslip2670-013	0.466	0.448	0.542	0.496	0.488
5	Coverslip2670-011_Reconstructed_crop.nd2	0.4	Length [µm]	GFP-CEP83	Figure 1D			Cell4	Coverslip2670-014	0.454	0.447	0.458	0.44	0.44975
6	Coverslip2670-011_Reconstructed_crop.nd2	0.399	Length [µm]	GFP-CEP83	Figure 1D			Cell5	Coverslip2670-015	0.402	0.45	0.49	0.446	0.447
7	Coverslip2670-011_Reconstructed_crop.nd2	0.385	Length [µm]	GFP-CEP83	Figure 1D			Cell6	Coverslip2670-017	0.42	0.427	0.473	0.427	0.43675
8	Coverslip2670-011_Reconstructed_crop.nd2	0.389	Length [µm]	GFP-CEP83	Figure 1D			Cell7	Coverslip2670-018	0.511	0.482	0.506	0.48	0.49475
Cell 2					Figure 1D			Cell8	Coverslip2670-019	0.465	0.447	0.479	0.479	0.4675
1	Coverslip2670-012_Reconstructed_crop.nd2	0.496	Length [µm]	CEP164	Figure 1D			Cell9	Coverslip2670-020	0.431	0.45	0.42	0.386	0.42175
2	Coverslip2670-012_Reconstructed_crop.nd2	0.454	Length [µm]	CEP164	Figure 1D			Cell10	Coverslip2671-011	0.465	0.43	0.447	0.46	0.4505
3	Coverslip2670-012_Reconstructed_crop.nd2	0.491	Length [µm]	CEP164	Figure 1D			Cell11	Coverslip2671-014	0.416	0.448	0.467	0.443	0.4435
4	Coverslip2670-012_Reconstructed_crop.nd2	0.453	Length [µm]	CEP164	Figure 1D			Average						0.456409
5	Coverslip2670-012_Reconstructed_crop.nd2	0.431	Length [µm]	GFP-CEP83	Figure 1D
6	Coverslip2670-012_Reconstructed_crop.nd2	0.463	Length [µm]	GFP-CEP83	Figure 1D
7	Coverslip2670-012_Reconstructed_crop.nd2	0.449	Length [µm]	GFP-CEP83	Figure 1D
8	Coverslip2670-012_Reconstructed_crop.nd2	0.45	Length [µm]	GFP-CEP83	Figure 1D
Cell 3					Figure 1D			GFP-CEP83						Diameter (µm)
1	Coverslip2670-013_Reconstructed_crop.nd2	0.466	Length [µm]	CEP164	Figure 1D			Cell1	Coverslip2670-011	0.4	0.399	0.385	0.389	0.39325
2	Coverslip2670-013_Reconstructed_crop.nd2	0.448	Length [µm]	CEP164	Figure 1D			Cell2	Coverslip2670-012	0.431	0.463	0.449	0.45	0.44825
3	Coverslip2670-013_Reconstructed_crop.nd2	0.542	Length [µm]	CEP164	Figure 1D			Cell3	Coverslip2670-013	0.414	0.414	0.434	0.446	0.427
4	Coverslip2670-013_Reconstructed_crop.nd2	0.496	Length [µm]	CEP164	Figure 1D			Cell4	Coverslip2670-014	0.378	0.434	0.441	0.411	0.416
5	Coverslip2670-013_Reconstructed_crop.nd2	0.414	Length [µm]	GFP-CEP83	Figure 1D			Cell5	Coverslip2670-015	0.402	0.449	0.414	0.416	0.42025
6	Coverslip2670-013_Reconstructed_crop.nd2	0.414	Length [µm]	GFP-CEP83	Figure 1D			Cell6	Coverslip2670-017	0.43	0.426	0.448	0.463	0.44175
7	Coverslip2670-013_Reconstructed_crop.nd2	0.434	Length [µm]	GFP-CEP83	Figure 1D			Cell7	Coverslip2670-018	0.406	0.444	0.416	0.415	0.42025
8	Coverslip2670-013_Reconstructed_crop.nd2	0.446	Length [µm]	GFP-CEP83	Figure 1D			Cell8	Coverslip2670-019	0.419	0.451	0.417	0.4	0.42175
Cell 4					Figure 1D			Cell9	Coverslip2670-020	0.414	0.398	0.414	0.429	0.41375
1	Coverslip2670-014_Reconstructed_crop.nd2	0.454	Length [µm]	CEP164	Figure 1D			Cell10	Coverslip2671-011	0.448	0.447	0.449	0.479	0.45575
2	Coverslip2670-014_Reconstructed_crop.nd2	0.447	Length [µm]	CEP164	Figure 1D			Cell11	Coverslip2671-014	0.404	0.417	0.437	0.431	0.42225
3	Coverslip2670-014_Reconstructed_crop.nd2	0.458	Length [µm]	CEP164	Figure 1D			Average						0.425477
4	Coverslip2670-014_Reconstructed_crop.nd2	0.44	Length [µm]	CEP164	Figure 1D
5	Coverslip2670-014_Reconstructed_crop.nd2	0.378	Length [µm]	GFP-CEP83	Figure 1D
6	Coverslip2670-014_Reconstructed_crop.nd2	0.434	Length [µm]	GFP-CEP83	Figure 1D
7	Coverslip2670-014_Reconstructed_crop.nd2	0.441	Length [µm]	GFP-CEP83	Figure 1D
8	Coverslip2670-014_Reconstructed_crop.nd2	0.411	Length [µm]	GFP-CEP83	Figure 1D
Cell 5					Figure 1D
1	Coverslip2670-015_Reconstructed_crop.nd2	0.402	Length [µm]	CEP164	Figure 1D
2	Coverslip2670-015_Reconstructed_crop.nd2	0.45	Length [µm]	CEP164	Figure 1D
3	Coverslip2670-015_Reconstructed_crop.nd2	0.49	Length [µm]	CEP164	Figure 1D
4	Coverslip2670-015_Reconstructed_crop.nd2	0.446	Length [µm]	CEP164	Figure 1D
5	Coverslip2670-015_Reconstructed_crop.nd2	0.402	Length [µm]	GFP-CEP83	Figure 1D
6	Coverslip2670-015_Reconstructed_crop.nd2	0.449	Length [µm]	GFP-CEP83	Figure 1D
7	Coverslip2670-015_Reconstructed_crop.nd2	0.414	Length [µm]	GFP-CEP83	Figure 1D
8	Coverslip2670-015_Reconstructed_crop.nd2	0.416	Length [µm]	GFP-CEP83	Figure 1D
Cell 6					Figure 1D
1	Coverslip2670-017_Reconstructed_crop.nd2	0.42	Length [µm]	CEP164	Figure 1D
2	Coverslip2670-017_Reconstructed_crop.nd2	0.427	Length [µm]	CEP164	Figure 1D
3	Coverslip2670-017_Reconstructed_crop.nd2	0.473	Length [µm]	CEP164	Figure 1D
4	Coverslip2670-017_Reconstructed_crop.nd2	0.427	Length [µm]	CEP164	Figure 1D
5	Coverslip2670-017_Reconstructed_crop.nd2	0.43	Length [µm]	GFP-CEP83	Figure 1D
6	Coverslip2670-017_Reconstructed_crop.nd2	0.426	Length [µm]	GFP-CEP83	Figure 1D
7	Coverslip2670-017_Reconstructed_crop.nd2	0.448	Length [µm]	GFP-CEP83	Figure 1D
8	Coverslip2670-017_Reconstructed_crop.nd2	0.463	Length [µm]	GFP-CEP83	Figure 1D
Cell 7					Figure 1D
1	Coverslip2670-018_Reconstructed_crop.nd2	0.511	Length [µm]	CEP164	Figure 1D
2	Coverslip2670-018_Reconstructed_crop.nd2	0.482	Length [µm]	CEP164	Figure 1D
3	Coverslip2670-018_Reconstructed_crop.nd2	0.506	Length [µm]	CEP164	Figure 1D
4	Coverslip2670-018_Reconstructed_crop.nd2	0.48	Length [µm]	CEP164	Figure 1D
5	Coverslip2670-018_Reconstructed_crop.nd2	0.406	Length [µm]	GFP-CEP83	Figure 1D
6	Coverslip2670-018_Reconstructed_crop.nd2	0.444	Length [µm]	GFP-CEP83	Figure 1D
7	Coverslip2670-018_Reconstructed_crop.nd2	0.416	Length [µm]	GFP-CEP83	Figure 1D
8	Coverslip2670-018_Reconstructed_crop.nd2	0.415	Length [µm]	GFP-CEP83	Figure 1D
Cell 8					Figure 1D
1	Coverslip2670-019_Reconstructed_crop.nd2	0.465	Length [µm]	CEP164	Figure 1D
2	Coverslip2670-019_Reconstructed_crop.nd2	0.447	Length [µm]	CEP164	Figure 1D
3	Coverslip2670-019_Reconstructed_crop.nd2	0.479	Length [µm]	CEP164	Figure 1D
4	Coverslip2670-019_Reconstructed_crop.nd2	0.479	Length [µm]	CEP164	Figure 1D
5	Coverslip2670-019_Reconstructed_crop.nd2	0.419	Length [µm]	GFP-CEP83	Figure 1D
6	Coverslip2670-019_Reconstructed_crop.nd2	0.451	Length [µm]	GFP-CEP83	Figure 1D
7	Coverslip2670-019_Reconstructed_crop.nd2	0.417	Length [µm]	GFP-CEP83	Figure 1D
8	Coverslip2670-019_Reconstructed_crop.nd2	0.4	Length [µm]	GFP-CEP83	Figure 1D
Cell 9					Figure 1D
1	Coverslip2670-020_Reconstructed_crop.nd2	0.431	Length [µm]	CEP164	Figure 1D
2	Coverslip2670-020_Reconstructed_crop.nd2	0.45	Length [µm]	CEP164	Figure 1D
3	Coverslip2670-020_Reconstructed_crop.nd2	0.42	Length [µm]	CEP164	Figure 1D
4	Coverslip2670-020_Reconstructed_crop.nd2	0.386	Length [µm]	CEP164	Figure 1D
5	Coverslip2670-020_Reconstructed_crop.nd2	0.414	Length [µm]	GFP-CEP83	Figure 1D
6	Coverslip2670-020_Reconstructed_crop.nd2	0.398	Length [µm]	GFP-CEP83	Figure 1D
7	Coverslip2670-020_Reconstructed_crop.nd2	0.414	Length [µm]	GFP-CEP83	Figure 1D
8	Coverslip2670-020_Reconstructed_crop.nd2	0.429	Length [µm]	GFP-CEP83	Figure 1D
Cell 10					Figure 1D
1	Coverslip2671-011_Reconstructed_crop.nd2	0.465	Length [µm]	CEP164	Figure 1D
2	Coverslip2671-011_Reconstructed_crop.nd2	0.43	Length [µm]	CEP164	Figure 1D
3	Coverslip2671-011_Reconstructed_crop.nd2	0.447	Length [µm]	CEP164	Figure 1D
4	Coverslip2671-011_Reconstructed_crop.nd2	0.46	Length [µm]	CEP164	Figure 1D
5	Coverslip2671-011_Reconstructed_crop.nd2	0.448	Length [µm]	GFP-CEP83	Figure 1D
6	Coverslip2671-011_Reconstructed_crop.nd2	0.447	Length [µm]	GFP-CEP83	Figure 1D
7	Coverslip2671-011_Reconstructed_crop.nd2	0.449	Length [µm]	GFP-CEP83	Figure 1D
8	Coverslip2671-011_Reconstructed_crop.nd2	0.479	Length [µm]	GFP-CEP83	Figure 1D
Cell 11					Figure 1D
1	Coverslip2671-014_Reconstructed_crop.nd2	0.416	Length [µm]	CEP164	Figure 1D
2	Coverslip2671-014_Reconstructed_crop.nd2	0.448	Length [µm]	CEP164	Figure 1D
3	Coverslip2671-014_Reconstructed_crop.nd2	0.467	Length [µm]	CEP164	Figure 1D
4	Coverslip2671-014_Reconstructed_crop.nd2	0.443	Length [µm]	CEP164	Figure 1D
5	Coverslip2671-014_Reconstructed_crop.nd2	0.404	Length [µm]	GFP-CEP83	Figure 1D
6	Coverslip2671-014_Reconstructed_crop.nd2	0.417	Length [µm]	GFP-CEP83	Figure 1D
7	Coverslip2671-014_Reconstructed_crop.nd2	0.437	Length [µm]	GFP-CEP83	Figure 1D
8	Coverslip2671-014_Reconstructed_crop.nd2	0.431	Length [µm]	GFP-CEP83	Figure 1D

## Sheet: CEP83-GFP native GFP(Figure 1F)
No.	Name	Value	Type		Figure
Cell 1
1	CEP83- LAPC-015_Reconstructed_crop.nd2	0.497	Length [µm]	CEP164	Figure 1F
2	CEP83- LAPC-015_Reconstructed_crop.nd2	0.482	Length [µm]	CEP164	Figure 1F			CEP164						Diameter (µm)
3	CEP83- LAPC-015_Reconstructed_crop.nd2	0.481	Length [µm]	CEP164	Figure 1F			Cell1	CEP83- LAPC-015	0.497	0.482	0.481	0.42	0.47
4	CEP83- LAPC-015_Reconstructed_crop.nd2	0.42	Length [µm]	CEP164	Figure 1F			Cell2	CEP83- LAPC-001	0.479	0.481	0.511	0.478	0.48725
5	CEP83- LAPC-015_Reconstructed_crop.nd2	0.35	Length [µm]	CEP83-GFP	Figure 1F			Cell3	CEP83- LAPC-006	0.417	0.451	0.479	0.512	0.46475
6	CEP83- LAPC-015_Reconstructed_crop.nd2	0.347	Length [µm]	CEP83-GFP	Figure 1F			Cell4	CEP83- LAPC-005	0.51	0.447	0.506	0.488	0.48775
7	CEP83- LAPC-015_Reconstructed_crop.nd2	0.291	Length [µm]	CEP83-GFP	Figure 1F			Cell5	CEP83- LAPC-007	0.482	0.501	0.478	0.514	0.49375
8	CEP83- LAPC-015_Reconstructed_crop.nd2	0.322	Length [µm]	CEP83-GFP	Figure 1F			Cell6	CEP83- LAPC-008	0.447	0.413	0.511	0.449	0.455
Cell 2								Average						0.476417
1	CEP83- LAPC-001_Reconstructed_crop.nd2	0.479	Length [µm]	CEP164	Figure 1F
2	CEP83- LAPC-001_Reconstructed_crop.nd2	0.481	Length [µm]	CEP164	Figure 1F
3	CEP83- LAPC-001_Reconstructed_crop.nd2	0.511	Length [µm]	CEP164	Figure 1F			CEP83-GFP						Diameter (µm)
4	CEP83- LAPC-001_Reconstructed_crop.nd2	0.478	Length [µm]	CEP164	Figure 1F			Cell1	CEP83- LAPC-015	0.35	0.347	0.291	0.322	0.3275
5	CEP83- LAPC-001_Reconstructed_crop.nd2	0.321	Length [µm]	CEP83-GFP	Figure 1F			Cell2	CEP83- LAPC-001	0.321	0.348	0.289	0.317	0.31875
6	CEP83- LAPC-001_Reconstructed_crop.nd2	0.348	Length [µm]	CEP83-GFP	Figure 1F			Cell3	CEP83- LAPC-006	0.35	0.318	0.32	0.366	0.3385
7	CEP83- LAPC-001_Reconstructed_crop.nd2	0.289	Length [µm]	CEP83-GFP	Figure 1F			Cell4	CEP83- LAPC-005	0.337	0.339	0.353	0.352	0.34525
8	CEP83- LAPC-001_Reconstructed_crop.nd2	0.317	Length [µm]	CEP83-GFP	Figure 1F			Cell5	CEP83- LAPC-007	0.336	0.322	0.347	0.351	0.339
Cell 3								Cell6	CEP83- LAPC-008	0.319	0.321	0.324	0.287	0.31275
1	CEP83- LAPC-006_Reconstructed_crop.nd2	0.417	Length [µm]	CEP164	Figure 1F			Average						0.330292
2	CEP83- LAPC-006_Reconstructed_crop.nd2	0.451	Length [µm]	CEP164	Figure 1F
3	CEP83- LAPC-006_Reconstructed_crop.nd2	0.479	Length [µm]	CEP164	Figure 1F
4	CEP83- LAPC-006_Reconstructed_crop.nd2	0.512	Length [µm]	CEP164	Figure 1F
5	CEP83- LAPC-006_Reconstructed_crop.nd2	0.35	Length [µm]	CEP83-GFP	Figure 1F
6	CEP83- LAPC-006_Reconstructed_crop.nd2	0.318	Length [µm]	CEP83-GFP	Figure 1F
7	CEP83- LAPC-006_Reconstructed_crop.nd2	0.32	Length [µm]	CEP83-GFP	Figure 1F
8	CEP83- LAPC-006_Reconstructed_crop.nd2	0.366	Length [µm]	CEP83-GFP	Figure 1F
Cell 4
1	CEP83- LAPC-005_Reconstructed_crop.nd2	0.51	Length [µm]	CEP164	Figure 1F
2	CEP83- LAPC-005_Reconstructed_crop.nd2	0.447	Length [µm]	CEP164	Figure 1F
3	CEP83- LAPC-005_Reconstructed_crop.nd2	0.506	Length [µm]	CEP164	Figure 1F
4	CEP83- LAPC-005_Reconstructed_crop.nd2	0.488	Length [µm]	CEP164	Figure 1F
5	CEP83- LAPC-005_Reconstructed_crop.nd2	0.337	Length [µm]	CEP83-GFP	Figure 1F
6	CEP83- LAPC-005_Reconstructed_crop.nd2	0.339	Length [µm]	CEP83-GFP	Figure 1F
7	CEP83- LAPC-005_Reconstructed_crop.nd2	0.353	Length [µm]	CEP83-GFP	Figure 1F
8	CEP83- LAPC-005_Reconstructed_crop.nd2	0.352	Length [µm]	CEP83-GFP	Figure 1F
Cell 5
1	CEP83- LAPC-007_Reconstructed_crop.nd2	0.482	Length [µm]	CEP164	Figure 1F
2	CEP83- LAPC-007_Reconstructed_crop.nd2	0.501	Length [µm]	CEP164	Figure 1F
3	CEP83- LAPC-007_Reconstructed_crop.nd2	0.478	Length [µm]	CEP164	Figure 1F
4	CEP83- LAPC-007_Reconstructed_crop.nd2	0.514	Length [µm]	CEP164	Figure 1F
5	CEP83- LAPC-007_Reconstructed_crop.nd2	0.336	Length [µm]	CEP83-GFP	Figure 1F
6	CEP83- LAPC-007_Reconstructed_crop.nd2	0.322	Length [µm]	CEP83-GFP	Figure 1F
7	CEP83- LAPC-007_Reconstructed_crop.nd2	0.347	Length [µm]	CEP83-GFP	Figure 1F
8	CEP83- LAPC-007_Reconstructed_crop.nd2	0.351	Length [µm]	CEP83-GFP	Figure 1F
Cell 6
1	CEP83- LAPC-009_Reconstructed_crop.nd2	0.447	Length [µm]	CEP164	Figure 1F
2	CEP83- LAPC-009_Reconstructed_crop.nd2	0.413	Length [µm]	CEP164	Figure 1F
3	CEP83- LAPC-009_Reconstructed_crop.nd2	0.511	Length [µm]	CEP164	Figure 1F
4	CEP83- LAPC-009_Reconstructed_crop.nd2	0.449	Length [µm]	CEP164	Figure 1F
5	CEP83- LAPC-009_Reconstructed_crop.nd2	0.319	Length [µm]	CEP83-GFP	Figure 1F
6	CEP83- LAPC-009_Reconstructed_crop.nd2	0.321	Length [µm]	CEP83-GFP	Figure 1F
7	CEP83- LAPC-009_Reconstructed_crop.nd2	0.324	Length [µm]	CEP83-GFP	Figure 1F
8	CEP83- LAPC-009_Reconstructed_crop.nd2	0.287	Length [µm]	CEP83-GFP	Figure 1F

## Sheet: GFP-CEP83 native GFP(Figure 1H)
No.	Name	Value	Type		Figure
Cell 1
1	LAPN-CEP83-011_Reconstructed_crop.nd2	0.48	Length [µm]	CEP164	Figure 1H
2	LAPN-CEP83-011_Reconstructed_crop.nd2	0.478	Length [µm]	CEP164	Figure 1H
3	LAPN-CEP83-011_Reconstructed_crop.nd2	0.512	Length [µm]	CEP164	Figure 1H
4	LAPN-CEP83-011_Reconstructed_crop.nd2	0.447	Length [µm]	CEP164	Figure 1H
5	LAPN-CEP83-011_Reconstructed_crop.nd2	0.382	Length [µm]	GFP-CEP83	Figure 1H
6	LAPN-CEP83-011_Reconstructed_crop.nd2	0.383	Length [µm]	GFP-CEP83	Figure 1H
7	LAPN-CEP83-011_Reconstructed_crop.nd2	0.384	Length [µm]	GFP-CEP83	Figure 1H
8	LAPN-CEP83-011_Reconstructed_crop.nd2	0.418	Length [µm]	GFP-CEP83	Figure 1H
Cell 2
1	LAPN-CEP83-010_Reconstructed_crop.nd2	0.429	Length [µm]	CEP164	Figure 1H
2	LAPN-CEP83-010_Reconstructed_crop.nd2	0.412	Length [µm]	CEP164	Figure 1H
3	LAPN-CEP83-010_Reconstructed_crop.nd2	0.481	Length [µm]	CEP164	Figure 1H
4	LAPN-CEP83-010_Reconstructed_crop.nd2	0.456	Length [µm]	CEP164	Figure 1H
5	LAPN-CEP83-010_Reconstructed_crop.nd2	0.379	Length [µm]	GFP-CEP83	Figure 1H
6	LAPN-CEP83-010_Reconstructed_crop.nd2	0.416	Length [µm]	GFP-CEP83	Figure 1H
7	LAPN-CEP83-010_Reconstructed_crop.nd2	0.38	Length [µm]	GFP-CEP83	Figure 1H
8	LAPN-CEP83-010_Reconstructed_crop.nd2	0.385	Length [µm]	GFP-CEP83	Figure 1H
Cell 3
1	LAPN-CEP83-009_Reconstructed_crop.nd2	0.421	Length [µm]	CEP164	Figure 1H
2	LAPN-CEP83-009_Reconstructed_crop.nd2	0.416	Length [µm]	CEP164	Figure 1H
3	LAPN-CEP83-009_Reconstructed_crop.nd2	0.478	Length [µm]	CEP164	Figure 1H
4	LAPN-CEP83-009_Reconstructed_crop.nd2	0.445	Length [µm]	CEP164	Figure 1H
5	LAPN-CEP83-009_Reconstructed_crop.nd2	0.385	Length [µm]	GFP-CEP83	Figure 1H
6	LAPN-CEP83-009_Reconstructed_crop.nd2	0.384	Length [µm]	GFP-CEP83	Figure 1H
7	LAPN-CEP83-009_Reconstructed_crop.nd2	0.371	Length [µm]	GFP-CEP83	Figure 1H
8	LAPN-CEP83-009_Reconstructed_crop.nd2	0.351	Length [µm]	GFP-CEP83	Figure 1H
Cell 4
1	LAPN-CEP83-008_Reconstructed_crop.nd2	0.466	Length [µm]	CEP164	Figure 1H
2	LAPN-CEP83-008_Reconstructed_crop.nd2	0.505	Length [µm]	CEP164	Figure 1H			CEP164						Diameter (µm)
3	LAPN-CEP83-008_Reconstructed_crop.nd2	0.443	Length [µm]	CEP164	Figure 1H			Cell1	LAPN-CEP83-011	0.48	0.478	0.512	0.447	0.47925
4	LAPN-CEP83-008_Reconstructed_crop.nd2	0.432	Length [µm]	CEP164	Figure 1H			Cell2	LAPN-CEP83-010	0.429	0.412	0.481	0.456	0.4445
5	LAPN-CEP83-008_Reconstructed_crop.nd2	0.427	Length [µm]	GFP-CEP83	Figure 1H			Cell3	LAPN-CEP83-009	0.421	0.416	0.478	0.445	0.44
6	LAPN-CEP83-008_Reconstructed_crop.nd2	0.373	Length [µm]	GFP-CEP83	Figure 1H			Cell4	LAPN-CEP83-008	0.466	0.505	0.443	0.432	0.4615
7	LAPN-CEP83-008_Reconstructed_crop.nd2	0.387	Length [µm]	GFP-CEP83	Figure 1H			Cell5	LAPN-CEP83-007	0.382	0.447	0.401	0.46	0.4225
8	LAPN-CEP83-008_Reconstructed_crop.nd2	0.375	Length [µm]	GFP-CEP83	Figure 1H			Cell6	LAPN-CEP83-002	0.415	0.479	0.408	0.412	0.4285
Cell 5								Average						0.446042
1	LAPN-CEP83-007_Reconstructed_crop.nd2	0.382	Length [µm]	CEP164	Figure 1H
2	LAPN-CEP83-007_Reconstructed_crop.nd2	0.447	Length [µm]	CEP164	Figure 1H
3	LAPN-CEP83-007_Reconstructed_crop.nd2	0.401	Length [µm]	CEP164	Figure 1H			GFP-CEP83 (native GFP)						Diameter (µm)
4	LAPN-CEP83-007_Reconstructed_crop.nd2	0.46	Length [µm]	CEP164	Figure 1H			Cell1	LAPN-CEP83-011	0.382	0.383	0.384	0.418	0.39175
5	LAPN-CEP83-007_Reconstructed_crop.nd2	0.352	Length [µm]	GFP-CEP83	Figure 1H			Cell2	LAPN-CEP83-010	0.379	0.416	0.38	0.385	0.39
6	LAPN-CEP83-007_Reconstructed_crop.nd2	0.462	Length [µm]	GFP-CEP83	Figure 1H			Cell3	LAPN-CEP83-009	0.385	0.384	0.371	0.351	0.37275
7	LAPN-CEP83-007_Reconstructed_crop.nd2	0.332	Length [µm]	GFP-CEP83	Figure 1H			Cell4	LAPN-CEP83-008	0.427	0.373	0.387	0.375	0.3905
8	LAPN-CEP83-007_Reconstructed_crop.nd2	0.385	Length [µm]	GFP-CEP83	Figure 1H			Cell5	LAPN-CEP83-007	0.352	0.462	0.332	0.385	0.38275
Cell 6								Cell6	LAPN-CEP83-002	0.38	0.392	0.38	0.379	0.38275
1	LAPN-CEP83-002_Reconstructed_crop.nd2	0.415	Length [µm]	CEP164	Figure 1H			Average						0.385083
2	LAPN-CEP83-002_Reconstructed_crop.nd2	0.479	Length [µm]	CEP164	Figure 1H
3	LAPN-CEP83-002_Reconstructed_crop.nd2	0.408	Length [µm]	CEP164	Figure 1H
4	LAPN-CEP83-002_Reconstructed_crop.nd2	0.412	Length [µm]	CEP164	Figure 1H
5	LAPN-CEP83-002_Reconstructed_crop.nd2	0.38	Length [µm]	GFP-CEP83	Figure 1H
6	LAPN-CEP83-002_Reconstructed_crop.nd2	0.392	Length [µm]	GFP-CEP83	Figure 1H
7	LAPN-CEP83-002_Reconstructed_crop.nd2	0.38	Length [µm]	GFP-CEP83	Figure 1H
8	LAPN-CEP83-002_Reconstructed_crop.nd2	0.379	Length [µm]	GFP-CEP83	Figure 1H
