# Supplementary material for: A hierarchical pathway for assembly of the distal appendages that organize primary cilia
Source: eLife. 2025 Jan 30;14:e85999. doi: 10.7554/eLife.85999 (PMC11984956; doi:10.7554/eLife.85999)
Supplement: Figure 1—source data 1. [file elife-85999-fig1-data1.xlsx]

## Sheet: IF condition
Exp. No.	Cell	Microscopy	Culture condition and fixation method	Primary antibody for 488 channel	Primary antibody for 568 channel	Primary antivody for 647 channel
CEP83 (Outer ring)
KAN667-1	RPE-hTERT	structured illumination	serum starved for 30 hours, fixed in 4% PFA at RT for 15 mintues	CEP83 antibody, Proteintech, 26013-1-AP, 1:500	CEP164, sc-515403, Santa Cruz, 1:200	CEP170, Invitrogen, 41-3200, 1:500
CEP83 (Inner ring)
KAN667-3	RPE-hTERT	structured illumination	Serum starved for 30 hours. Fixed in 100% methanol at -20C for 5 minutes.	CCDC41, SIGMA, HPA038161, 1:500	CEP164, sc-515403, Santa Cruz, 1:200	CEP170, Invitrogen, 41-3200, 1:500
TTBK2
KAN673-1	RPE-hTERT	structured illumination	serum starved for 24 hours, fixed in 4% PFA at RT for 15 mintues	TTBK2, SIGMA, HPA018113, 1:500	CEP164, sc-515403, Santa Cruz, 1:200	CEP170, Invitrogen, 41-3200, 1:1000		2021-05-25
FBF1
KAN648-3	RPE-hTERT	structured illumination	Serum starved for 24 hours. Fixed in 100% methanol at -20C for 5 minutes.	FBF1, 11531-1-AP,Proteintech, 1:500	CEP164, sc-515403, Santa Cruz, 1:200	CEP170, Invitrogen, 41-3200, 1:500		2021-05-11
KIZ
KAN541-1	RPE-BFP-Cas9 pMCB306 (pool)	structured illumination	Serum starved for 24 hours. Fixed in 100% methanol at -20C for 5 minutes.	Kizuna antivody, Proteintech, 21177-1-AP, 1:500	CEP164, sc-515403, Santa Cruz, 1:200	CEP170, Invitrogen, 41-3200, 1:500		2020-08-14
ANKRD26
KAN649-2	RPE-hTERT	structured illumination	Serum starved for 24 hours. Fixed in 100% methanol at -20C for 5 minutes.	ANKRD26, in house, M8, 1:1000	CEP164, sc-515403, Santa Cruz, 1:200	CEP170, Invitrogen, 41-3200, 1:500		2021-05-12
PIDD1
KAN673-3	RPE-hTERT	structured illumination	Serum starved for 24 hours. Fixed in 100% methanol at -20C for 5 minutes.	PIDD1, Enzo Life Sciences, ALX-804-837-C100, 1:500	CEP164, sc-515403, Santa Cruz, 1:200	Ninein, ab52473, Abcam, 1:1000		2021-05-25
SCLT1
KAN644-2	RPE-hTERT	structured illumination	Serum starved for 24 hours. Fixed in 100% methanol at -20C for 5 minutes.	SCLT1, HPA036561, SIGMA, 1:100	CEP164, sc-515403, Santa Cruz, 1:500	CEP170, Invitrogen, 41-3200, 1:1000		2021-05-04
CEP89
KAN644-1	RPE-hTERT	structured illumination	Serum starved for 24 hours. Fixed in 100% methanol at -20C for 5 minutes.	CEP89, 24002-1-AP, Proteintech, 1:250	CEP164, sc-515403, Santa Cruz, 1:500	CEP170, Invitrogen, 41-3200, 1:1000		2021-05-04
LRRC45
KAN648-2	RPE-hTERT	structured illumination	Serum starved for 24 hours. Fixed in 100% methanol at -20C for 5 minutes.	LRRC45, anti-rabbit, gift from Dr. Pereira, 1:250	CEP164, sc-515403, Santa Cruz, 1:200	CEP170, Invitrogen, 41-3200, 1:500		2021-05-11
INPP5E
KAN679-1	RPE-BFP-Cas9 sgSafe (pool)	structured illumination	Confluent, fixed in 100% methanol for 5 minutes at -20C.	INPP5E, Proteintech, 17797-1-AP, 1:500	CEP170, Invitrogen, 41-3200, 1:1000	Ac-Tub, 6B-11, Santa Cruz, 1:1000	DAPI	2021-06-07
