# Supplementary material for: A hierarchical pathway for assembly of the distal appendages that organize primary cilia
Source: eLife. 2025 Jan 30;14:e85999. doi: 10.7554/eLife.85999 (PMC11984956; doi:10.7554/eLife.85999)
Supplement: Figure 1—source data 2. [file elife-85999-fig1-data2.xlsx]

## Sheet: Raw data
KAN644-1	CEP89			Length (nm)			KAN648-1	SCLT1						KAN648-2	LRRC45						KAN648-3	FBF1						KAN649-1	NCS1						KAN667-1	CEP83 (Proteintech)						KAN667-2	CEP83 (SIGMA)						KAN667-2
top_44	1	RGB Profiles:0089-0386	0	363.15			Top_11	1	RGB Profiles:0024-0354	0	462.933			Top_046	1	RGB Profiles:0025-0430	0	316.25			Top_025	1	RGB Profiles:0026-0345	0	518.433			Top_008	1	RGB Profiles:0077-0422	0	313.9			Top_38	1	RGB Profiles:0239-0404	0	454.4			Top_20	1	RGB Profiles:0028-0345	0	272			Top_20
	2	RGB Profiles:0027-0317	0	411.733				2	RGB Profiles:0162-0417	0	391.733				2	RGB Profiles:0078-0372	0	361.5				2	RGB Profiles:0126-0311	0	531.667				2	RGB Profiles:0054-0396	0	318.933				2	RGB Profiles:0076-0323	0	547.6				3	RGB Profiles:0047-0284	0	364
	3	RGB Profiles:0026-0448	0	458.7				3	RGB Profiles:0022-0352	0	424.333				3	RGB Profiles:0027-0398	0	301.6				3	RGB Profiles:0246-0341	0	486.867				3	RGB Profiles:0027-0366	0	343.2				3	RGB Profiles:0171-0424	0	500.967				5	RGB Profiles:0020-0298	0	338.8
	4	RGB Profiles:0063-0422	0	417.383	412.742			4	RGB Profiles:0183-0398	0	456	433.75			4	RGB Profiles:0032-0337	0	309.75	322.275			4	RGB Profiles:0251-0315	0	516	513.242			4	RGB Profiles:0034-0375	0	356.067	333.025			4	RGB Profiles:0211-0320	0	526	507.242			7	RGB Profiles:0149-0301	0	284.95	314.938
Top_45	5	RGB Profiles:0152-0359	0	358.45			Top_5	1	RGB Profiles:0063-0419	0	394.667			Top_045	1	RGB Profiles:0021-0378	0	279			Top_029	1	RGB Profiles:0237-0434	0	397.017			Top_001	5	RGB Profiles:0124-0354	0	283.65			Top_30	5	RGB Profiles:0026-0321	0	552.367			Top_1	1	RGB Profiles:0048-0366	0	313.633			Top_1
	6	RGB Profiles:0226-0371	0	401.033				2	RGB Profiles:0266-0413	0	403.75				2	RGB Profiles:0085-0429	0	326.4				2	RGB Profiles:0145-0324	0	436.683				6	RGB Profiles:0028-0400	0	278.85				6	RGB Profiles:0180-0305	0	659.883				3	RGB Profiles:0149-0365	0	403.033
	7	RGB Profiles:0133-0391	0	393.9				3	RGB Profiles:0263-0346	0	392.7				3	RGB Profiles:0031-0475	0	317.55				3	RGB Profiles:0112-0370	0	359.45				7	RGB Profiles:0024-0427	0	310.733				7	RGB Profiles:0269-0348	0	529.1				5	RGB Profiles:0028-0397	0	305.2
	8	RGB Profiles:0053-0377	0	397.25	387.658			4	RGB Profiles:0252-0345	0	404	398.779			4	RGB Profiles:0052-0305	0	259.2	295.538			4	RGB Profiles:0099-0337	0	394.117	396.817			8	RGB Profiles:0025-0335	0	249.9	280.783			8	RGB Profiles:0080-0373	0	625.95	591.825			7	RGB Profiles:0063-0368	0	303.483	331.337
Top_47	9	RGB Profiles:0176-0380	0	423.4			Top_001	1	RGB Profiles:0029-0316	0	393.7			Top_042	1	RGB Profiles:0112-0355	0	340.3			Top_028	1	RGB Profiles:0095-0355	0	338.3			Top_002	1	RGB Profiles:0244-0368	0	282.2			Top_35	1	RGB Profiles:0032-0350	0	478.067			Top_8	1	RGB Profiles:0022-0344	0	294.65			Top_8
	10	RGB Profiles:0250-0448	0	381.15				2	RGB Profiles:0154-0283	0	485.683				2	RGB Profiles:0066-0345	0	356.883				2	RGB Profiles:0030-0378	0	402.8				2	RGB Profiles:0178-0416	0	329				2	RGB Profiles:0194-0321	0	529.033				3	RGB Profiles:0080-0345	0	330.667
	11	RGB Profiles:0095-0396	0	349.2				3	RGB Profiles:0269-0352	0	354.883				3	RGB Profiles:0104-0410	0	300.9				3	RGB Profiles:0287-0337	0	425.5				3	RGB Profiles:0108-0393	0	314.55				3	RGB Profiles:0081-0363	0	504				5	RGB Profiles:0119-0343	0	249.2	291.506
	12	RGB Profiles:0122-0405	0	375.533	382.321			4	RGB Profiles:0036-0297	0	385.6	404.966			4	RGB Profiles:0045-0385	0	370.45	342.133			4	RGB Profiles:0118-0410	0	466.2	408.2			4	RGB Profiles:0190-0363	0	288.933	303.671			4	RGB Profiles:0096-0319	0	474.917	496.504
																																										Top_9	1	RGB Profiles:0205-0383	0	282.333			Top_9
Top_43	13	RGB Profiles:0068-0348	0	395.417			Top_009	5	RGB Profiles:0231-0321	0	457.5			Top_040	1	RGB Profiles:0116-0435	0	337.25			Top_031	1	RGB Profiles:0162-0349	0	465.75			Top_007	1	RGB Profiles:0054-0361	0	321.067			Top_3	5	RGB Profiles:0242-0369	0	515				3	RGB Profiles:0160-0366	-0.163	303.485
	14	RGB Profiles:0084-0434	0	374.783				6	RGB Profiles:0183-0381	0	406.917				2	RGB Profiles:0208-0390	-0.365	340.007				2	RGB Profiles:0033-0349	0	426	452.65			2	RGB Profiles:0064-0436	0	322.733				6	RGB Profiles:0211-0377	0	516.267				5	RGB Profiles:0133-0437	0	297.083
	15	RGB Profiles:0159-0428	0	302.133				7	RGB Profiles:0270-0387	0	460.567				3	RGB Profiles:0202-0377	0	328.9											3	RGB Profiles:0180-0377	0	277.5				7	RGB Profiles:0098-0408	0	577.15				7	RGB Profiles:0026-0291	0	345.183	307.021
	16	RGB Profiles:0170-0371	0	338.2	352.633			8	RGB Profiles:0235-0350	0	389.083	428.517			4	RGB Profiles:0032-0363	0	311.417	329.394										4	RGB Profiles:0027-0326	0	276.45	299.438			8	RGB Profiles:0131-0418	0	524	533.104
																																										Top_19	1	RGB Profiles:0217-0401	0	257.3			Top_19
Top_46	17	RGB Profiles:0193-0356	0	318.45			Top_007	9	RGB Profiles:0166-0386	0	408.567			Top_039	5	RGB Profiles:0032-0400	0	277.4			Top_034	1	RGB Profiles:0135-0422	0	465.3			Top_004	1	RGB Profiles:0021-0307	0	301.817			Top_29	1	RGB Profiles:0158-0417	0	440.3				3	RGB Profiles:0253-0317	0	363.467
	18	RGB Profiles:0222-0337	0	391.4				10	RGB Profiles:0230-0333	0	406.333				6	RGB Profiles:0027-0318	0	359.567				2	RGB Profiles:0175-0266	0	460.8				2	RGB Profiles:0153-0380	0	302.4				2	RGB Profiles:0097-0318	0	512.05				5	RGB Profiles:0176-0393	0	289.333
	19	RGB Profiles:0310-0382	0	350				11	RGB Profiles:0232-0361	0	408.333				7	RGB Profiles:0051-0315	0	307.8				3	RGB Profiles:0208-0380	0	439.467				3	RGB Profiles:0028-0317	0	327.75				3	RGB Profiles:0026-0409	0	506.25				7	RGB Profiles:0228-0319	0	302.6	303.175
	20	RGB Profiles:0209-0351	-0.195	304.002	340.963			12	RGB Profiles:0285-0343	0	436.8	415.008			8	RGB Profiles:0034-0368	0	277.1	305.467			4	RGB Profiles:0079-0343	0	475.233	460.2			4	RGB Profiles:0160-0359	0	288.333	305.075			4	RGB Profiles:0028-0380	0	406.8	466.35
																																										Top_15	1	RGB Profiles:0186-0403	0	286			Top_15
Top_32	21	RGB Profiles:0279-0381	0	263.733			Top_012	13	RGB Profiles:0295-0387	0	371			Top_43	1	RGB Profiles:0142-0410	0	323.15			Top_030	1	RGB Profiles:0031-0407	0	462.4			Top_003	1	RGB Profiles:0041-0449	0	284.85			Top_32	5	RGB Profiles:0064-0361	0	478.5				3	RGB Profiles:0179-0293	0	323.9
	22	RGB Profiles:0155-0351	0	316.8				14	RGB Profiles:0168-0362	0	433.55				2	RGB Profiles:0043-0368	0	304.85				2	RGB Profiles:0032-0406	0	396.667				2	RGB Profiles:0055-0385	0	276.033				6	RGB Profiles:0172-0367	0	577.583				5	RGB Profiles:0105-0290	-15.938	292.91
	23	RGB Profiles:0216-0437	0	349.917				15	RGB Profiles:0119-0367	0	437.75				3	RGB Profiles:0064-0249	0	312.983				3	RGB Profiles:0209-0356	0	419.833				3	RGB Profiles:0023-0308	0	295.2				7	RGB Profiles:0070-0332	0	491.25				7	RGB Profiles:0151-0311	0	319.7	305.627
	24	RGB Profiles:0271-0381	0	317.55	312			16	RGB Profiles:0073-0341	0	423.283	416.396			4	RGB Profiles:0101-0348	0	311.267	313.062			4	RGB Profiles:0051-0280	0	403	420.475			4	RGB Profiles:0024-0363	0	306.533	290.654			8	RGB Profiles:0028-0359	0	511.5	514.708
																																										Top_17	1	RGB Profiles:0146-0383	0	283.733			Top_17
Top_40	25	RGB Profiles:0155-0365	0	309.867			Top_006	17	RGB Profiles:0247-0383	0	363.417			Top_44	1	RGB Profiles:0226-0346	0	340			Top_036	5	RGB Profiles:0215-0419	0	481.333			Top_006	1	RGB Profiles:0061-0374	0	317.133			Top_37	9	RGB Profiles:0200-0429	0	490.5				3	RGB Profiles:0264-0291	0	345.1
	26	RGB Profiles:0146-0385	0	303.333				18	RGB Profiles:0255-0295	0	459.2				2	RGB Profiles:0197-0421	0	282.517				6	RGB Profiles:0137-0370	0	442.15				2	RGB Profiles:0111-0385	0	366.4				10	RGB Profiles:0219-0389	0	501.167				5	RGB Profiles:0117-0327	0	331.8
	27	RGB Profiles:0129-0390	0	357.833				19	RGB Profiles:0216-0404	0	464.533				3	RGB Profiles:0028-0325	0	276.5				7	RGB Profiles:0224-0361	0	398.4				3	RGB Profiles:0104-0396	0	311.6				11	RGB Profiles:0046-0375	0	464				7	RGB Profiles:0196-0297	0	333.333	323.492
	28	RGB Profiles:0098-0384	0	344.85	328.971			20	RGB Profiles:0275-0404	0	432.45	429.9			4	RGB Profiles:0144-0373	0	282.5	295.379			8	RGB Profiles:0062-0310	0	513.667	458.887			4	RGB Profiles:0122-0313	0	295.033	322.541			12	RGB Profiles:0104-0361	0	416.15	467.954
																																										Top_16	1	RGB Profiles:0133-0388	0	283.2			Top_16
Top_36	29	RGB Profiles:0130-0381	0	351.45			Top_008	21	RGB Profiles:0025-0346	0	433.1			Top_41	1	RGB Profiles:0123-0432	0	306			Top_035	1	RGB Profiles:0086-0329	0	500			Top_005	1	RGB Profiles:0077-0386	0	320.733			Top_26	13	RGB Profiles:0027-0348	0	498.6				3	RGB Profiles:0155-0306	0	331.567
	30	RGB Profiles:0066-0374	0	398.533				22	RGB Profiles:0251-0384	0	400.583				2	RGB Profiles:0200-0388	0	332.8				2	RGB Profiles:0066-0314	0	436				2	RGB Profiles:0135-0415	0	348.067				14	RGB Profiles:0255-0396	0	602.633				5	RGB Profiles:0112-0360	0	311.417
	31	RGB Profiles:0199-0351	-0.587	341.551				23	RGB Profiles:0225-0354	0	422.4				3	RGB Profiles:0052-0401	0	311.6				3	RGB Profiles:0137-0381	0	398.267				3	RGB Profiles:0111-0339	0	316.8				15	RGB Profiles:0031-0362	0	526.883				7	RGB Profiles:0120-0321	0	338.55	316.183
	32	RGB Profiles:0032-0363	0	352.867	361.1			24	RGB Profiles:0189-0388	0	382.95	409.758			4	RGB Profiles:0130-0349	0	303.85	313.562			4	RGB Profiles:0195-0386	0	343.633	419.475			4	RGB Profiles:0096-0296	0	338.267	330.967			16	RGB Profiles:0077-0334	0	566.883	548.75									KAN649-2
																																	308.269									Top_10	1	RGB Profiles:0141-0387	0	287.767			Top_31
Top_14	33	RGB Profiles:0027-0392	0	333.033			Top_10	25	RGB Profiles:0190-0353	0	361.8										Top_032	1	RGB Profiles:0230-0409	0	441			KAN426-1_6	1	RGB Profiles:0157-0370	0	316.35			Top_6	17	RGB Profiles:0079-0365	0	459.333				2	RGB Profiles:0069-0362	0	224.1
	34	RGB Profiles:0147-0375	0	349.917				26	RGB Profiles:0197-0365	0	348.25											2	RGB Profiles:0144-0387	0	400.4				2	RGB Profiles:0051-0365	0	363.467				18	RGB Profiles:0089-0368	0	588				3	RGB Profiles:0031-0362	0	301.317
	35	RGB Profiles:0124-0286	0	349.267				27	RGB Profiles:0265-0349	0	432.4											3	RGB Profiles:0029-0324	0	444.267				3	RGB Profiles:0028-0397	0	345.433				19	RGB Profiles:0193-0425	0	480.2				4	RGB Profiles:0025-0294	0	323.833	284.254
	36	RGB Profiles:0153-0407	0	397.6	357.454			28	RGB Profiles:0267-0322	0	471.5	403.487										4	RGB Profiles:0065-0347	0	449.4	433.767			4	RGB Profiles:0185-0359	0	295	330.062			20	RGB Profiles:0265-0354	0	459.533	496.767
																																																	Top_36
Top_41	37	RGB Profiles:0181-0373	0	349.5			Top_008	29	RGB Profiles:0059-0370	0	416										Top_026	1	RGB Profiles:0030-0387	0	455.4			KAN426-1_8	1	RGB Profiles:0093-0418	0	282.9			Top_27	1	RGB Profiles:0058-0381	0	553
	38	RGB Profiles:0196-0372	0	383.333				30	RGB Profiles:0201-0374	0	379.383											2	RGB Profiles:0032-0388	0	496.633				2	RGB Profiles:0031-0350	0	306.9				2	RGB Profiles:0077-0317	0	546.25
	39	RGB Profiles:0165-0354	0	331.067				31	RGB Profiles:0205-0403	0	427.5											3	RGB Profiles:0159-0410	0	457.517				3	RGB Profiles:0131-0325	0	329				3	RGB Profiles:0176-0325	0	487.5
	40	RGB Profiles:0026-0390	0	380.567	361.117			32	RGB Profiles:0174-0348	0	434.6	414.371										4	RGB Profiles:0055-0337	0	540.15	487.425							306.267			4	RGB Profiles:0210-0301	0	427.45	503.55
																																																	Top_35
Top_42	1	RGB Profiles:0023-0338	0	312.8																		5	RGB Profiles:0035-0386	0	485.9			KAN426-1_9	1	RGB Profiles:0121-0356	0	336.933			Top_16	5	RGB Profiles:0025-0392	0	518.4
	2	RGB Profiles:0120-0342	0	398.35																	Top_033	6	RGB Profiles:0187-0387	0	452.833				2	RGB Profiles:0029-0322	0	318.167				6	RGB Profiles:0095-0335	0	534.6
	3	RGB Profiles:0154-0360	0	358																		7	RGB Profiles:0115-0346	0	545.3				3	RGB Profiles:0081-0434	0	314.6				7	RGB Profiles:0151-0399	0	542.5
	4	RGB Profiles:0179-0366	0	372.6	360.438																	8	RGB Profiles:0138-0369	0	427.7	477.933			4	RGB Profiles:0029-0379	0	310.5	320.05			8	RGB Profiles:0281-0310	0	551.367	536.717
																																																	Top_005
					359.763																							KAN426-1_10	1	RGB Profiles:0227-0347	0	375.25			Top_19	9	RGB Profiles:0026-0363	0	396.033
					7.65589																								2	RGB Profiles:0096-0374	0	433.917				10	RGB Profiles:0274-0282	0	490.25
																													3	RGB Profiles:0220-0339	0	375.467				11	RGB Profiles:0242-0383	0	494.667
																													4	RGB Profiles:0026-0427	0	373.667	389.575			12	RGB Profiles:0172-0334	0	546.817	481.942
																																																	Top_027
																												KAN426-1_10	1	RGB Profiles:0056-0354	0	312.467			Top_14	1	RGB Profiles:0294-0316	0	571.5
																													2	RGB Profiles:0164-0348	0	353.5				2	RGB Profiles:0279-0399	0	485.333
																													3	RGB Profiles:0170-0336	0	361.517				3	RGB Profiles:0289-0241	0	523.033
																													4	RGB Profiles:0251-0435	0	336.55	341.008			4	RGB Profiles:0243-0307	0	566.267	536.533
																																	337.393																Top_034
																																			Top_34	1	RGB Profiles:0224-0389	0	463.6
																																				2	RGB Profiles:0224-0342	0	506.6
																																				3	RGB Profiles:0195-0328	0	540.467
												415.493							314.601							448.097							319.919			4	RGB Profiles:0137-0314	0	511.2	505.467							308.615
												3.41118							5.07651							9.91378							6.33104														4.42481		Top_028

																																								513.387
																																								9.04735
11							10							8							11							13							14
																																																	Top_029



[truncated: 30 more columns]

## Sheet: Total analysis
	CEP83 (Outer)	CEP83 (Inner)	TTBK2	FBF1	KIZ	ANKRD26	CEP164	PIDD1	SCLT1	CEP89	C3orf14	NCS1	LRRC45
	507.242	314.938	459.179	513.242	425.4	483.646	416.267	479.942	433.75	412.741	308.525	333.025	322.275
	591.825	331.337	505.863	396.817	445.008	430.959	478.892	387.754	398.779	387.658	356.904	280.783	295.538
	496.504	291.506	471.262	408.2	433.35	411.283	403.288	426.6	404.966	382.321	356.796	303.671	342.133
	533.104	307.021	472.429	430.425	462.579	411.288	471.254	410.05	428.517	352.633	308.321	299.438	329.394
	466.35	303.175	474.321	460.2	447.163	389.212	427.55	412.883	415.008	340.963	365.371	305.075	305.467
	514.708	305.627	479.183	420.475	440.087	411.804	362.679	363	416.396	312	352.408	290.654	313.062
	467.954	323.491	383.663	458.887	393.629	398.892	445.192	425.025	429.9	328.971	349.717	322.541	295.379
	548.75	316.183	490.45	419.475	432.5	455.413	481.012	374.354	409.758	361.1	340.567	330.967	313.562
	496.767	284.254	431.104	433.767	439.587	445.8	442.725	478.492	403.488	357.454	320.458	330.062
	503.55		488.371	487.425		470.708	409.871	388.246	414.371	361.117	387.208	306.267
	536.717		476.075	477.933		434.634	439.475	411.319		360.438	307.6	320.05
	481.942		457.866			390.721	389.625	452.65			389.179	389.575
	536.533		471.546			488.304	393.496	407.229			344.329	341.009
	505.467		489.208				445.8				312.433
							374.754				414.608
							478.621				366.562
Average	513.387	308.615	467.894	446.077	435.478	432.513	428.781	416.734	415.493	359.763	348.812	319.471	314.601
S.E.M.	9.04735	4.94708	8.02806	10.9628	6.30944	9.46517	9.49279	10.0573	3.7712	8.3866	7.9952	7.66946	5.75622
