# Supplementary material for: A hierarchical pathway for assembly of the distal appendages that organize primary cilia
Source: eLife. 2025 Jan 30;14:e85999. doi: 10.7554/eLife.85999 (PMC11984956; doi:10.7554/eLife.85999)
Supplement: Figure 1—source data 3. [file elife-85999-fig1-data3.xlsx]

## Sheet: CEP83
	+FBS			-FBS					Table Analyzed	Identify outliers of KAN660_CEP83:Cleaned data
	Rep. 1	Rep. 2	Rep. 3	Rep. 1	Rep. 2	Rep. 3			Column B	-FBS
	0.407888	0.240225	0.917349	0.234907	1.43012	1.15654			vs.	vs.
	0.337355	1.20971	1.27228	2.24716	1.93971	1.13303			Column A	+FBS
	1.29184	0.799958	1.27392	2.50948	1.5312	0.984191
	0.964917	0.823874	1.51114	1.2143	2.19394	0.737058			Nested t test
	0.227671	0.897409	0.896871	1.36405	0.702507	1.88			P value	0.0082
	1.08473	0.785621	1.69102	1.23181	1.1669	0.43709			P value summary	**
	1.40419	1.15699	0.275639	1.70582	1.68442	1.33847			Significantly different (P < 0.05)?	Yes
	1.25665	0.784498	1.75778	1.76622	0.968829	0.161288			One- or two-tailed P value?	Two-tailed
	1.6608	1.0197	0.795216	0.846092	1.88282	1.17104			t, df	t=4.878, df=4
	0.621011	2.06887	1.41768	2.07387	1.33643	1.58617			F, DFn, Dfd	23.79, 1, 4
	0.673873	0.529341	2.9026	0.723611	2.24831	1.3238
	0.848758	0.438497	1.49443	2.43552	1.18084	1.37394			How big is the difference?
	1.60779	1.36167	0.934879	0.89187	1.74295	0.349361			Mean of column B	1.493
	0.767714	0.306756	0.876311	1.11192	1.18692	1.279			Mean of column A	1.037
	0.285636	0.151099	1.10911	1.268	0.56548	0.317988			Difference between means (B - A) ± SEM	0.4563 ± 0.09355
	0.186006	1.08075	0.375082	0.905276	1.91394	1.76917			95% confidence interval	0.1966 to 0.7161
	2.34404	1.20324	0.0746232	0.711424	1.07797	1.19373
	1.63917	0.68295	0.17464	1.09433	0.336553	2.19479			Random effects	SD	Variance
	0.313971	1.16849	1.51221	1.79219	1.39352	2.87271			Variation within subcolumns	0.61	0.3721
	1.11055	0.169532	1.13721	2.46424	0.781855	1.47526			Variation among subcolumn means	0.09829	0.009661
	1.62523	0.252646	0.913827	2.20694	1.55301	1.72354
	1.4508	0.613644	0.52998	0.702665	1.17556	2.24828			Do the subcolumns differ (within each column)?
	0.802447	2.57489	0.696347	2.10266	2.39353	3.22592			Chi-square, df	5.390, 1
	0.829639	0.551804	2.38123	1.51258	1.94096	2.24951			P value	0.0202
	1.21445	1.50425	1.32593	1.98041	1.98714	1.60804			P value summary	*
	0.261262	0.0186974	0.809961	1.58715	1.68997	2.04456			Is there significant difference between subcolumns (P < 0.05)?	Yes
	1.66088	0.876267	1.644	2.26567	0.606773	2.74861
	1.10096	0.594881	0.206832	1.71001	2.14419	1.96666			Data analyzed
	1.54236	0.481772	1.293	1.25345	1.54032	0.650229			Number of treatments (columns)	2
	1.64374	1.57778	1.35215	1.52004	0.857041	1.16981			Number of subjects (subcolumns)	6
	1.44479	1.4693	0.767611	0.80496	1.68012	1.98706			Total number of values	647
	1.91148	0.886838	1.11222	0.631065	2.64155	1.37058
	0.820194	1.19564	1.41497	0.867572	0.734087	2.3723
	1.8641	0.65573	1.30873	1.54899	1.57461	1.87451
	0.483525	0.0182349	0.798247	1.79418	2.32105	1.5883
	0.809378	1.31939	0.341825	1.29846	2.84326	1.27548
	0.418247	1.11649	0.291366	0.0995537	0.737589	2.56889
	0.673035	1.12442	1.55996	1.74291	1.38209	1.99934
	1.01923	1.31034	1.35952	1.51128	0.7253	1.67128
	0.931631	1.26283	2.01401	0.239782	1.76244	1.2251
	0.615374	0.993208	1.11214	0.197051	1.20568	2.072
	0.941304	1.59992	1.85403	0.61606	1.71639	1.49017
	1.15252	1.25061	1.34469	0.929422	1.49949	1.43447
	1.23014	1.3223	1.29595	0.21198	1.42596	1.67972
	0.155691	1.70662	1.25057	0.847158	1.35507	2.01393
	0.762686	0.450984	1.98501	1.36968	1.70695	0.942742
	0.498225	1.07533	1.36353	1.46687	1.83063	1.68955
	1.07148	1.64715	1.74959	0.542175	1.95028	0.902769
	0.53174	1.65264	0.048329	1.4227	1.32045	2.30496
	0.0549183	0.816937	2.0942	1.54883	1.97624	1.97797
	1.70033	0.126059	0.234682	1.29656	1.35473	1.64925
	0.435766	1.56833	0.167185	1.44448	1.24777	2.13352
	1.40343	1.06621	0.960026	1.53672	2.37153	2.39785
	1.51791	0.822025	1.21085	0.772665	0.490625	2.40949
	1.03766	0.959645	0.771134	1.34401	1.13869	0.967562
	0.853328	0.760779	2.34051	1.52415	2.02962	1.7296
	1.03515	1.32124	0.117382	2.61544	0.674956	1.00451
	0.980379	0.750472	1.77056	1.38278	2.74429	1.94069
	0.573024	2.26159	0.816923	1.68198	1.85137	2.16972
	0.716528	1.38268	1.31553	1.48104	1.97809	0.614269
	0.573786	1.75095	0.912434	1.52042	0.684338	1.48091
	1.21536	0.927998	1.54702	1.29458	0.825196	1.73272
	0.37544	1.2697	1.02703	1.61876	1.19934	1.10813
	0.663742	1.1556	0.615416	1.37646	1.40904	0.60829
	0.598465	2.23226	0.136714	1.47754	1.49592	0.701016
	1.23349	1.0312	1.03391	1.58974	0.385312	0.175131
	0.124233	1.04613	0.083306	0.100239	0.672445	1.84658
	1.69043	0.106569	1.94495	1.99069	0.966715	2.22756
	0.942294	0.80597	1.14032	1.50092	1.65264	1.91375
	1.14239	0.457723	1.41481	1.91407	0.986469	3.10624
	1.56163	1.18342	0.955685	1.24705	1.36643	1.47166
	1.22001	0.964138	0.447412	1.94164	1.59496	1.77867
	0.119434	1.22313	0.126802	2.02428	1.38711	2.52531
	1.16593	1.80539	0.962647	2.0268	1.68957	0.0683159
	0.0539281	0.728868	0.315695	2.95934	1.47326	0.870249
	0.0668769	1.00147	1.85698	1.79654	1.22907	2.12279
	1.03256	1.29019	1.86697	0.226681	2.33935	2.28678
	1.52827	1.26667	2.04702	0.102981	1.02063	1.56447
	1.51631	1.10156	1.05267	1.64245	1.05412	1.76212
	0.114407	0.854662	1.26728	0.60372	1.62033	0.892529
	1.16981	1.63757	0.892939	0.895602	0.782383	1.68349
	0.376506	0.439091	1.79317	1.625	0.881949	2.90645
	0.93323	0.64212	1.72731	1.75982	0.0556958	1.53031
	1.7043	1.72703	1.05865	1.6509	1.29481	1.54112
	0.887224	0.164378	1.37647	2.05681	1.06734	1.87828
	0.103667	1.3108	1.73657	1.44456	1.24328	1.94086
	0.45359	0.259715	0.391547	0.868867	1.7382	2.05439
	0.97878	0.242141	1.17439	2.17578	0.988253	2.08748
	0.266137	1.60084	1.02466	1.77026	2.14571	2.61198
	0.139162	0.468492	0.620577	1.98399	2.06576	2.1001
	0.727724	0.680175	0.708961	2.2921	1.45219	2.29161
	1.57763	1.32633	0.883601	1.39169	2.17015	2.51851
	1.04451	0.225822	1.39409	1.0241	1.92603	2.08462
	0.972381	1.41023	0.709207	0.735418	1.86987	2.86894
	1.30532	1.60831	0.316596	1.32223	2.3155	1.85321
	1.45461	1.83624	1.28137	2.46843	1.38684	2.23771
	0.839237	0.870849	1.52515	0.0839389	1.99639	1.7518
	1.13074	2.0507	1	2.36027	1.69083	1.71085
	0.867115	0.877985	1.44717	1.25086	1.50834	0.658257
	0.736332	1.98364	0.285796	0.282285	1.66783
	1.18886	0.515731	1.78358	3.41362	1.2557
	0.202916	0.118461	1.95831	0.0787594	0.172505
	1.14361	0.382206	1.96568	1.0142	1.72023
	2.05955	0.685659	2.01016	0.253569
	1.24012	0.762959	0.191514	0.596332
	1.28407	0.149183	0.581258	0.913121
	1.37798		0.0527523
	2.08956
	1.74649
	0.393035
	1.11413
	0.367823
	1.30197
	2.1863
	2.70364
	1.04771
	2.11995
	1.78938
	1.66811
	1.12685
	0.907104
	1.88055
	0.856146
	0.385266
	0.257606
	0.144798

## Sheet: TTBK2
		+FBS			-FBS					Table Analyzed	Identify outliers of Data 1:Cleaned data
		Rep. 1	Rep. 2	Rep. 3	Rep. 1	Rep. 2	Rep. 3			Column B	TTBK2 -FBS
		1.10605	0.17345	0.118312	1.29451	0.99276	0.0737207			vs.	vs.
		1.76918	1.45737	1.01114	1.12068	0.965999	1.34273			Column A	TTBK2 +FBS
		1.37282	0.827437	0.297078	0.783649	1.34056	1.11619
		0.875936	1.28991	0.282214	1.03533	1.53568	1.438			Nested t test
		0.816139	1.92773	0.416188	1.96255	1.46993	1.44728			P value	0.0184
		0.0325826	0.848615	0.989095	1.4914	1.47174	2.16733			P value summary	*
		1.12938	1.92453	1.98218	1.9856	2.48436	0.405614			Significantly different (P < 0.05)?	Yes
		0.70173	0.801907	1.6435	0.139679	1.49103	2.02428			One- or two-tailed P value?	Two-tailed
		0.749493	0.154898	0.13158	1.50843	0.926598	1.57208			t, df	t=3.842, df=4
		0.129683	1.3005	1.40758	1.3532	0.68321	2.7981			F, DFn, Dfd	14.76, 1, 4
		0.717188	0.420203	1.42723	1.80732	1.16687	1.94607
		1.9221	2.6226	1.18352	1.3357	1.6873	1.07678			How big is the difference?
		1.26998	1.39769	1.42394	0.21984	1.2813	1.33286			Mean of column B	1.256
		1.26609	1.89719	0.0916771	1.98661	1.83719	1.90427			Mean of column A	1
		0.812807	0.361675	1.24836	1.13761	3.09829	1.58355			Difference between means (B - A) ± SEM	0.2556 ± 0.06651
		1.28461	1.05178	0.36601	1.79501	1.41526	2.10598			95% confidence interval	0.07089 to 0.4402
		0.549462	0.212113	1.05892	0.906019	0.224262	2.04772
		0.208732	1.70355	2.13042	0.706451	1.3766	1.55143			Random effects	SD	Variance
		1.52472	0.500402	1.36877	1.24212	0.811512	1.84072			Variation within subcolumns	0.6352	0.4035
		1.21194	1.17622	2.26699	1.29044	2.28292	1.54385			Variation among subcolumn means	0.05233	0.002738
		1.59211	1.46944	0.0911783	2.07122	1.3106	0.0850931
		0.0969148	1.40976	0.674859	1.12827	1.40607	1.24058			Do the subcolumns differ (within each column)?
		1.11133	0.887853	1.40987	1.04487	1.4036	1.35949			Chi-square, df	0.5567, 1
		1.93524	1.99447	2.71141	0.714689	0.807161	1.78775			P value	0.4556
		0.906482	1.08782	0.0907793	2.48322	0.882517	2.20304			P value summary	ns
		0.0699786	0.819474	2.12314	2.11435	1.84663	1.16297			Is there significant difference between subcolumns (P < 0.05)?	No
		0.930086	0.812168	0.931834	0.476058	2.23515	0.151831
		0.38914	1.26266	0.0385064	1.26239	0.778595	2.27217			Data analyzed
		0.962021	0.720231	1.16896	0.0983033	1.76971	1.98098			Number of treatments (columns)	2
		1.60784	1.93208	1.22652	0.34545	1.1557	1.1502			Number of subjects (subcolumns)	6
		2.36122	1.28368	1.99026	0.14801	0.627801	1.16826			Total number of values	624
		0.811974	1.05244	1.33465	0.125332	1.01024	1.37206
		0.874732	0.712761	0.627075	0.800774	1.04447	0.150933
		0.162265	0.926762	1.8074	0.944989	1.88299	0.138862
		0.562976	0.318662	2.03445	1.27989	1.28343	1.4413
		0.271121	1.39761	1.17145	0.902502	1.22498	0.786088
		1.72058	0.506477	0.967048	1.45965	0.63289	0.656504
		0.258162	0.576579	2.02468	1.80602	0.538573	0.866393
		0.622032	0.611794	0.0553654	1.0556	1.27481	2.14359
		1.36829	0.452217	2.1385	1.38865	1.41986	1.03578
		0.653504	2.14493	1.40568	0.10432	0.129123	0.839758
		1.49214	0.529133	1.58654	1.20722	2.49282	2.90264
		0.124592	0.68124	0.363117	0.764581	1.15948	2.15316
		0.310183	0.492111	1.06451	0.870012	1.8376	1.729
		0.11191	1.39359	0.387358	0.615367	1.81699	0.359426
		1.09957	0.678531	0.0217471	1.37782	0.790497	1.56519
		0.648968	0.782945	1.62086	1.44178	1.20175	2.15416
		0.359335	0.909606	2.11336	1.38152	0.502783	1.23719
		0.715522	0.991528	0.384964	0.372571	1.26291	0.794967
		1.13558	0.968462	0.136069	0.97248	0.632562	0.29608
		2.02808	0.776132	1.86127	0.166245	0.887606	0.874374
		0.865013	0.215478	0.653212	0.547703	1.66218	0.0693314
		1.18047	1.52263	2.34939	0.834837	0.608921	0.150235
		1.34385	1.26069	2.015	0.967945	0.369555	1.31261
		1.26313	0.710298	0.135471	0.69488	1.14224	1.23589
		1.04255	0.0543416	0.256476	2.08732	1.46583	1.00945
		0.543537	0.960089	0.138164	0.823729	0.731231	1.21724
		0.717466	1.08691	0.230539	1.89757	1.23672	0.208892
		0.619348	0.046215	1.07798	0.524469	2.45686	1.08297
		1.05181	1.20184	0.229442	0.767821	1.58592	1.8509
		0.580563	0.267439	1.8114	0.641933	1.01295	1.4784
		1.46909	0.514685	0.0558642	1.31099	1.14979	1.16048
		1.13789	1.03676	0.053869	0.768376	1.3853	1.70426
		1.62635	1.29525	0.204503	0.110429	0.0404689	1.45257
		0.86779	2.39308	2.3429	0.221877	0.239037	1.20866
		1.12317	2.16398	1.26782	0.982385	1.35476	2.25182
		0.697842	0.35913	1.20487	1.57767	0.123541	0.998472
		1.78325	0.689777	1.12506	1.35172	1.43242	1.21335
		0.176057	1.15718	0.612511	1.17631	1.73392	1.46454
		0.812529	0.314147	2.4272	0.0709042	0.691336	1.46095
		2.01244	0.0496626	2.2622	1.6992	1.04751	1.77259
		2.61105	0.0532744	0.329499	1.13465	0.903531	1.39062
		1.21268	1.01542	0.318226	2.31966	1.17606	0.836067
		1.05449	0.757745	1.36638	2.70991	0.776871	2.51917
		1.79593	1.41879	1.14382	1.27007	1.22589	1.6878
		0.9324	0.595459	2.26679	1.25647	0.319811	2.72428
		0.748012	1.06368	0.425665	1.7802	2.135	2.77086
		1.27803	1.06779	1.70106	0.834097	1.28737	1.0274
		0.445419	0.114675	0.122602	1.69448	0.74929	1.8105
		0.123573	1.14897	0.746485	0.831968	1.21382	1.50324
		0.837614	0.5192	0.829483	1.20121	1.6149	1.47322
		0.0681273	1.24386	0.154225	0.940175	0.10384	3.0014
		1.1241	1.71077	1.43541	0.874455	0.942358	1.26602
		1.12262	0.977409	0.536994	1.74623	2.44997	2.10598
		1.4365	1.27522	0.0598544	2.14906	1.00253	1.57098
		0.0379514	1.2423	0.862802	1.58016	1.47683	1.96273
		1.27822	0.428658	1.81209	1.27239	1.64716	1.45666
		1.78668	0.105071	0.152928	1.90164	1.33104	1.57138
		0.524654	1.44563	1.49207	1.46474	1.67392	0.277126
		1.43965	1.47674	0.729127	1.93265	2.51186
		2.08047	1.83768	0.811527	2.01207	1.68828
		0.732369	2.46712	0.128188	1.29701	1.98888
		0.856127	1.83908	0.641241	1.6719	1.12254
		0.669055	0.514193	0.308749	1.83518	1.17278
		1.61191	0.81143	1.08227	1.70337	0.977327
		0.894819	0.479224	0.32501	1.69087	1.15037
		0.717373	1.01977	1.46324	1.00016	0.417658
		0.765599	0.0841391	1.62515	0.300186	0.890233
		1.82204	1.23828	1.25176	0.780224	0.0376779
		1.96912	1.39581	0.718752		0.0677217
		1.32061	1.39006	0.872877		1.0558
		1.04413	1.79303	0.679348		0.99161
			1.33063	1.09514		0.758319
			0.253567	1.08037		2.33882
			0.96132	0.642637		0.663016
			0.297073	0.84724		2.92074
			1.97452	0.0790079		0.0359541
			1.28236			0.414621
			2.2977			0.731559
			0.88342
			0.73985
			1.00573
			0.413636
			0.774819
			1.24846
			0.798706
			0.0379242
			1.2373

## Sheet: FBF1
	+FBS			-FBS					Table Analyzed	Identify outliers of Data 1:Cleaned data
	Rep. 1	Rep. 2	Rep. 3	Rep. 1	Rep. 2	Rep. 3			Column B	FBF1 -FBS
	0.478879	0.772878	1.53319	0.899148	1.21813	1.17952			vs.	vs.
	0.483098	1.12154	1.1859	1.34528	0.683955	0.7933			Column A	FBF1 +FBS
	1.65626	1.40545	1.05993	1.08419	1.3843	0.647648
	1.57834	1.17019	1.19638	1.13859	2.19809	1.15889			Nested t test
	1.7953	1.48868	1.04336	1.30676	1.26562	1.20954			P value	0.3517
	0.592549	0.630775	0.563768	1.7096	1.27806	0.973326			P value summary	ns
	1.08974	1.46509	0.79513	1.69284	1.01402	1.09573			Significantly different (P < 0.05)?	No
	0.697283	1.0425	0.565301	0.514845	0.937067	1.31414			One- or two-tailed P value?	Two-tailed
	1.34905	1.35692	0.978865	1.73991	1.41313	0.787563			t, df	t=1.053, df=4
	1.15274	0.158551	0.841769	1.57834	1.54948	1.11596			F, DFn, Dfd	1.109, 1, 4
	0.813673	2.03443	1.34797	1.2804	1.48671	1.49733
	0.239495	0.638156	1.59827	1.10401	1.33972	0.945778			How big is the difference?
	1.41088	0.964209	0.856853	1.03652	1.41754	1.2722			Mean of column B	1.104
	0.452904	1.18262	1.03203	1.24493	2.74552	1.07086			Mean of column A	1.004
	0.703777	0.481116	0.991823	0.977462	2.00955	0.730737			Difference between means (B - A) ± SEM	0.09996 ± 0.09491
	1.40406	0.929686	0.150598	1.90852	1.22947	1.07417			95% confidence interval	-0.1636 to 0.3635
	1.16068	1.29148	0.849039	0.7388	0.669599	0.572719
	0.816226	0.306524	0.386511	1.50707	1.68333	1.16319			Random effects	SD	Variance
	1.15835	1.05104	1.38392	1.1982	1.33705	0.950774			Variation within subcolumns	0.4229	0.1788
	0.405504	0.400213	2.07465	0.698782	1.05104	1.36468			Variation among subcolumn means	0.107	0.01144
	1.54331	2.09662	0.93836	0.918463	1.31438	1.17328
	1.52644	1.70989	0.0758185	1.00088	0.861395	1.15474			Do the subcolumns differ (within each column)?
	1.6057	0.666635	1.69101	1.15407	1.23511	1.01749			Chi-square, df	15.14, 1
	1.41111	1.12555	0.229434	0.615195	1.90459	1.79487			P value	<0.0001
	1.45451	1.71965	0.907646	1.3344	1.75685	0.582809			P value summary	****
	1.31958	0.901846	1.08213	2.17694	1.23906	0.84894			Is there significant difference between subcolumns (P < 0.05)?	Yes
	0.828603	0.737251	1.21616	1.40522	1.15182	0.737908
	0.642835	1.85176	0.0194368	0.997887	1.68989	1.0668			Data analyzed
	1.01437	1.15908	2.02771	1.57201	1.94359	1.89215			Number of treatments (columns)	2
	0.644445	0.841518	1.04306	0.970691	1.09585	0.796317			Number of subjects (subcolumns)	6
	0.422932	0.726731	1.44832	0.871341	1.25766	0.995285			Total number of values	528
	1.44874	1.0676	1.35247	1.05805	1.28433	0.0247783
	1.14403	0.657859	0.186159	0.433256	0.836694	0.712586
	1.5129	0.743993	1.45687	1.11478	1.0794	1.09643
	0.569516	0.341047	1.34535	1.16584	1.21133	0.886973
	0.831712	1.56267	1.38615	1.28883	1.74342	0.780738
	1.36437	1.15711	1.06383	1.82699	0.449267	0.583303
	0.0483986	1.02279	1.34396	0.652437	1.14403	0.743892
	0.123383	0.363191	1.57038	0.842701	1.60719	0.887765
	1.25037	0.597821	0.09575	0.898093	0.988677	1.08283
	0.677469	0.776714	0.681773	0.872007	0.676922	0.875499
	0.636896	0.64484	0.729055	1.09702	1.13601	1.10948
	1.24698	1.21476	0.70037	0.907973	1.28108	1.09994
	1.43897	1.28538	0.506397	0.946547	1.30398	0.0224538
	0.0567795	1.65322	0.554371	1.52833	0.699298	0.813133
	1.22267	1.04197	1.78033	1.17905	1.2469	0.762587
	1.38879	0.982575	0.0785882	1.39373	1.64962	1.01833
	0.928453	1.14293	1.98676	1.61797	1.48258	0.97021
	0.973355	0.976181	1.27294	0.794025	1.59899	0.663425
	0.915854	1.18012	0.0541561	1.11972	0.451359	0.805615
	1.38352	1.32217	1.19559	1.51579	1.17036	0.90181
	0.972467	0.77468	1.03515	1.16012	1.48026	1.36167
	1.65365	0.879702	0.870306	1.19476	0.646119	0.537011
	0.835652	1.94766	1.35825	0.872395	0.656987	1.36444
	0.647608	0.334771	0.840532	1.41466	0.966824	0.903937
	0.765608	1.44655	0.288783	1.81389	1.96143	0.251344
	1.26336	0.840704	0.8207	0.98107	1.06603	0.938706
	1.57956	0.872612	0.735831	1.13981	0.920619	1.01616
	1.09357	0.626358	0.863679	0.523726	0.811993	0.931633
	0.644667	0.944041	1.60965	1.51812	1.25992	0.908833
	0.376976	0.442932	1.20454	0.0223122	1.48967	0.794636
	1.36115	0.405096	1.0713	1.12327	1.71204	0.522668
	0.826494	0.915621	0.0405058	0.821888	1.08411	0.318606
	0.646054	0.777412	1.12239	0.939942	0.969905	1.00597
	0.593326	0.879644	1.20479	1.58761	1.26882	1.09465
	1.23322	1.25277	0.245607	2.02774	0.328145	0.557684
	0.502357	1.02558	1.29698	1.44202	0.673261	0.408916
	1.33118	1.31723	1.19574	1.3404	0.628973	0.758532
	1.52245	0.589742	1.26463	1.17106	0.28688	1.20157
	1.24271	0.878598	1.30326	0.968693		0.983069
	0.411277	1.37041	0.579099	2.38307		1.12007
	1.20136	1.26428	1.96836	0.80124		0.684049
	0.753064	1.60173	1.19406	1.81789		1.05557
	1.1977	1.03116	1.3129	1.09663		0.857051
	1.03691	1.28782	0.728857	1.42371		0.580682
	0.509073	1.12979	0.0430776	0.349946		0.797702
	1.55114	0.333085	1.62607	1.59477		1.13119
	1.23161	1.35198	1.59897	0.792415		0.909229
		0.347789	0.864272	0.771879		0.667579
		0.0424856	1.41266	0.593715		0.775248
		1.18913	1.35885	1.47405		1.26072
		1.19611	0.899437	1.22606		1.18194
		1.2211	1.1308			1.02748
		1.01088	0.0549969			0.858139
		0.840472	2.00106			0.743101
		0.788629	0.566933			0.965364
		1.32839	1.25954			0.552244
		1.38488	0.460005			0.763824
		1.45137	1.11186			1.60431
		1.37552				1.52963
		1.16711				0.994692
		1.0887				0.820255
		0.781131				0.884204
		1.53076				0.947312
		1.16106				0.906558
		0.593578				1.29396
		0.954503				0.931337
		0.605551				0.418708
		1.05377				1.19603
		0.514535				0.993357
		1.06046				0.465446
		1.20081				0.533796
		1.00379				1.15365
		0.89679				0.940931
		0.890397				0.574055

## Sheet: KIZ
	+FBS			-FBS					Table Analyzed	Identify outliers of Data 1:Cleaned data
	Rep. 1	Rep. 2	Rep. 3	Rep. 1	Rep. 2	Rep. 3			Column B	KIZ -FBS
	0.745978	2.53522	0.617217	2.02496	2.01672	1.90173			vs.	vs.
	0.449626	0.924223	1.25327	2.23788	0.257564	1.59668			Column A	KIZ +FBS
	1.22796	1.31916	1.00874	1.57565	1.7275	1.3295
	1.19968	0.0699267	0.124239	0.864384	1.26954	2.17357			Nested t test
	0.896167	1.51504	0.0993844	1.51187	1.26787	2.12713			P value	0.0403
	0.0198649	1.88344	1.28425	1.73917	1.8612	0.715003			P value summary	*
	1.14788	0.817403	1.85301	1.67325	1.5273	0.0753118			Significantly different (P < 0.05)?	Yes
	0.713045	1.80377	1.03407	0.96146	1.4941	0.904116			One- or two-tailed P value?	Two-tailed
	1.06376	1.39422	1.39451	1.68308	0.0278006	0.774913			t, df	t=2.991, df=4
	0.747808	0.557288	0.954369	1.21944	1.17361	1.65315			F, DFn, Dfd	8.948, 1, 4
	0.0336135	1.47736	0.33076	1.21024	1.42843	1.10918
	0.689886	1.78948	1.26537	1.36665	1.1361	2.29563			How big is the difference?
	1.12707	1.0734	1.07524	1.9133	0.904207	1.66618			Mean of column B	1.303
	0.786649	0.575015	0.847267	1.79244	0.766904	1.86515			Mean of column A	0.9806
	1.19001	0.771778	1.04777	1.97274	0.751401	1.82795			Difference between means (B - A) ± SEM	0.3219 ± 0.1076
	0.534052	0.593723	0.888748	2.24029	1.28524	0.88851			95% confidence interval	0.02312 to 0.6207
	0.353856	0.436306	0.616707	1.18886	1.20023	0.0551493
	1.253	0.0520689	0.173574	1.50565	0.67248	1.3804			Random effects	SD	Variance
	1.79981	1.13567	1.41362	1.68308	1.52442	1.30876			Variation within subcolumns	0.5144	0.2646
	1.29007	1.46064	0.833972	1.64795	0.264923	1.20128			Variation among subcolumn means	0.1228	0.01509
	1.95847	0.253411	1.08782	1.90949	0.239968	1.04689
	0.0369068	1.05299	1.31519	1.35076	1.60661	1.92761			Do the subcolumns differ (within each column)?
	1.38463	0.994837	1.09976	1.5032	1.4299	1.59474			Chi-square, df	14.67, 1
	1.2002	0.152315	1.62466	0.727055	0.658319	1.36027			P value	0.0001
	0.485435	0.833462	0.971506	1.05404	0.675882	1.00112			P value summary	***
	1.70922	0.419397	0.472578	1.68428	0.793462	0.516643			Is there significant difference between subcolumns (P < 0.05)?	Yes
	1.21787	0.656978	1.0457	1.41668	1.10852	1.94135
	1.39519	0.948099	0.216483	2.05121	0.603895	1.66369			Data analyzed
	1.20752	1.67124	0.909896	1.54314	1.02918	2.02257			Number of treatments (columns)	2
	0.705569	1.39624	1.31179	0.309474	1.11526	1.67934			Number of subjects (subcolumns)	6
	1.04981	1.21956	1.1154	1.44967	1.26552	1.79184			Total number of values	717
	0.640747	1.08053	1.31019	1.44423	0.817109	1.97905
	0.459036	1.24347	1.43691	0.767882	1.4057	1.02931
	0.0352863	1.59497	0.690047	0.732544	1.3621	0.680663
	1.31051	0.127458	1.45717	1.73572	1.11866	1.6591
	1.14291	0.451711	0.471388	1.78392	1.31343	1.39448
	1.46294	0.315161	0.419842	1.69636	1.2666	1.56798
	1.64241	0.557615	1.28465	1.25509	0.310615	1.77219
	2.23182	0.366935	1.43263	1.44972	1.27464	1.82999
	2.11472	0.939105	0.870965	0.568031	0.745122	1.55901
	2.04525	0.650044	1.08065	1.16251	1.13603	2.07643
	1.26832	1.05685	1.32627	1.71167	0.932596	1.63857
	1.21531	0.731908	1.50913	1.82318	1.22892	0.986976
	1.47706	1.66261	1.35905	0.770287	1.25034	1.10958
	1.86646	1.27709	1.1496	0.433159	1.63818	0.0343408
	2.12554	0.252201	0.49325	1.30758	0.504336	1.20417
	1.56316	0.255929	1.01044	1.2507	1.02725	1.56009
	0.945045	1.6267	0.959979	0.977561	0.877649	1.81371
	0.62543	0.485922	1.33888	1.02137	0.698024	0.706469
	0.38794	0.94823	0.936757	1.106	1.5778	0.692053
	0.802489	0.581196	1.05501	1.98779	1.92678	0.887252
	1.19738	0.981067	1.25089	1.25055	1.15696	1.14736
	0.456892	0.844812	1.16307	1.16628	1.42676	0.755022
	1.32598	0.742669	1.22927	0.675615	0.0410795	1.54592
	0.87097	0.245398	0.397538	1.56263	0.623617	1.57788
	0.0610061	0.457238	1.75672	1.7926	1.48635	0.48611
	1.76672	1.01492	1.52535	1.6629	0.799284	2.16517
	0.824549	1.10624	1.06841	1.48087	1.57067	1.5093
	1.06549	1.5828	1.80388	0.747181	1.78588	1.42307
	0.23221	1.44377	1.09486	1.46101	1.3151	1.74261
	0.891358	0.78522	1.2295	1.20115	1.16848	1.85175
	0.535515	0.700183	1.85961	0.605304	0.560526	1.44691
	0.992094	0.42777	1.16164	1.05347	0.883634	1.53442
	2.00254	1.2091	0.0565434	1.86834	1.27438	2.50957
	0.605879	1.23592	1.1429	1.38448	0.880102	2.00727
	1.88277	1.03899	0.195267	1.09309	0.649978	1.76186
	0.598194	1.82303	1.5604	0.903643	1.36802	1.13532
	0.4766	0.87935	0.663526	0.81216	0.86244	1.1599
	1.75914	0.922915	0.940395	1.10423	0.375439	0.0228146
	0.23979	0.528244	1.12237	0.809598	1.36665	1.42773
	0.809598	0.403632	1.07099	2.24583	0.791434	0.529053
	0.514605	0.794803	1.29676	2.06522	1.53813	1.13597
	0.120078	0.841377	2.08483	1.47607	1.23467	1.48152
	0.875362	1.82761	1.14933	0.561653	1.24619	2.24263
	1.94718	0.558694	0.688789	1.21411	0.911271	1.61895
	0.312349	0.774002	0.0437591	1.57325	1.43072	1.90748
	1.05362	1.14274	0.0750058	1.85914	0.563208	1.53385
	1.6905	0.421654	0.392914	0.736987	1.03929	2.07133
	0.531595	0.0918401	1.66142	1.40973	0.265937	1.45211
	0.154946	1.22509	0.64367	0.89737	0.752448	1.56213
	1.13988	0.455832	0.834652	1.2666	1.00259	1.45857
	0.561496	1.20023	0.0881302	1.83593	0.728899	1.68015
	0.384385	0.515881	1.7439	2.13061	0.953921	1.00319
	0.40195	0.107016	0.979054	1.52798	1.50974	1.59614
	0.160696	1.18447	0.40682	1.90008	1.74179	1.85308
	2.14415	0.164776	0.516201	1.61632	1.33116	0.621909
	1.13078	1.13129	1.11669	2.11791	1.24815	2.05817
	0.494688	1.41384	0.175614	2.20124	1.57123	1.84397
	0.595737	0.653805	1.91724	1.41192	1.20403	0.643466
	0.679222	0.627836	1.54337	1.39807	0.857011	1.24803
	0.730139	1.62048	2.09952	2.21776	2.30712	1.54762
	1.28824	1.2122	1.62147	1.34971	0.98702	1.23498
	1.95277	0.53351	0.153684	1.34558	0.933545	1.02706
	0.204974	0.818188	0.122199	2.00426	1.38961	1.63547
	1.63713	1.06561	1.97147	1.01165	0.803274	2.06586
	1.09863	1.12848	0.0981604	2.10144	0.893904	0.827682
	1.11144	1.55925	1.4604	0.962192	0.971713	1.94808
	0.376858	1.34113	1.79235	1.04824		1.87487
	0.73521	0.0602783	1.8202			1.92452
	0.850478	0.389765	1.08935			1.75301
	1.25614	0.544336	0.749616			1.29417
	0.0825438	1.38719	1.31332			0.903436
	1.39875	0.82993	0.822004			1.03614
	0.581414	1.85368	0.662676
	0.664898	1.70781	2.11642
	0.22876	9.17231	0.39203
	0.0545239	0.934951	0.610145
	0.819479	0.0934101	1.54921
	1.46117	0.975049	1.24715
	2.13563	1.07713	1.88694
	0.642472	1.32916	1.63694
	1.37496	0.842359	0.116487
	1.2356	1.06614	0.0318928
	0.790988	1.51333	1.56995
	2.25357	1.15696	0.0138043
	1.82893	0.721246	1.46795
	1.20156	0.886578	0.449491
	2.1442	0.683993	1.57478
	1.89657	0.87065	1.65533
	0.412301	2.15713	0.669306
	0.849433	1.53175	0.872461
	1.38782	1.29168	1.08636
	0.937622	0.676634	0.705381
	0.713881	0.727591	1.19676
	0.121751	1.26967	1.14906
	1.06826	1.03422	1.17959
		0.440067	0.620821
		1.49868	1.78576
		0.660346	1.63762
		0.9098	0.874399
		1.44691	1.14008
		0.914607	0.612933
		0.989375	0.164122
		0.713331	0.90126
		1.2717	0.0884362
		0.68746	0.865593
		0.429601	1.92958
		1.03333	0.199721
		0.440231	0.72177
		1.11382	1.33739
		1.25969	0.0125803
		0.631924	0.75543
			0.616027
			0.820066
			0.701267
			1.54847
			0.181258
			1.11737
			1.6162
			1.38941
			0.246166
			0.631497

## Sheet: ANKRD26
	+FBS			-FBS
	1.40727	0.256257	0.166918	1.36291	0.969637	1.24347			Table Analyzed	Identify outliers of KAN656_ANKRD26:Cleaned data
	1.3022	0.457817	1.22603	1.4794	0.865892	1.55308			Column B	ANKRD26 -FBS
	1.06337	0.11412	1.18623	1.64957	1.55321	1.58594			vs.	vs.
	0.871019	1.33873	0.893702	0.602242	1.06206	1.20944			Column A	ANKRD26 +FBS
	1.32791	1.31195	2.18521	1.13486	0.862553	1.11664
	1.19952	1.32319	1.2633	1.67149	0.759116	1.71105			Nested t test
	0.0756342	0.777682	1.6913	1.23885	1.26773	1.25856			P value	0.4798
	1.79616	0.934636	1.64875	1.19853	1.075	1.44192			P value summary	ns
	0.598996	1.2678	1.57376	1.61444	1.26901	1.173			Significantly different (P < 0.05)?	No
	1.68044	0.878167	1.16629	1.50957	0.636187	1.20981			One- or two-tailed P value?	Two-tailed
	0.451546	0.755675	1.24736	1.16605	0.762737	0.734312			t, df	t=0.7784, df=4
	1.40208	0.768874	0.698151	1.0949	1.2297	0.830554			F, DFn, Dfd	0.6059, 1, 4
	0.919034	0.543664	1.25972	1.5445	1.54956	1.19697
	0.697445	1.25219	0.991165	0.942898	1.14215	1.43013			How big is the difference?
	0.826886	0.908494	1.64957	1.49458	0.609121	1.65972			Mean of column B	1.076
	0.636798	0.534136	1.35338	0.716632	0.755187	0.774763			Mean of column A	1
	0.0320419	0.532801	1.02949	0.683667	1.25799	1.16797			Difference between means (B - A) ± SEM	0.07558 ± 0.09710
	0.622861	1.0276	0.125273	1.13439	1.04123	1.12516			95% confidence interval	-0.1940 to 0.3452
	1.23191	1.10163	1.10868	0.853964	1.23178	0.991535
	0.763884	1.04193	0.858762	0.433346	1.63805	1.11326			Random effects	SD	Variance
	1.02375	1.29235	0.254183	1.12032	0.943675	1.19629			Variation within subcolumns	0.4421	0.1955
	0.578823	1.26357	0.825668	1.10499	1.09105	1.1078			Variation among subcolumn means	0.1113	0.0124
	1.08001	0.520218	0.9458	1.61489	0.762223	0.654376
	0.636352	0.808626	1.86683	1.91914	0.852667	1.22276			Do the subcolumns differ (within each column)?
	1.71945	1.07549	0.843962	1.48083	0.731561	0.580234			Chi-square, df	18.77, 1
	0.456224	0.679278	0.902679	1.42178	1.06278	1.49266			P value	<0.0001
	2.12142	1.18026	1.0375	0.280836	1.04123	1.5574			P value summary	****
	1.38967	1.34145	0.035622	1.77535	0.277006	1.37679			Is there significant difference between subcolumns (P < 0.05)?	Yes
	1.49464	1.53875	0.0396273	1.37994	1.35583	0.841576
	0.598837	1.33213	1.16274	0.88241	0.790881	1.16325			Data analyzed
	0.933925	1.41153	1.21069	1.04593	2.53869	1.61245			Number of treatments (columns)	2
	0.343679	1.39045	1.55617	1.27369	1.34995	0.204272			Number of subjects (subcolumns)	6
	1.56426	0.235996	1.63191	1.45624	1.05869	0.811237			Total number of values	675
	0.721723	0.865558	1.51325	0.570041	1.31423	1.67636
	0.943471	1.04519	1.07636	0.813235	0.885485	1.3917
	1.56837	1.52386	1.28952	1.18037	0.451448	1.71108
	1.16236	1.50837	0.535608	0.841459	1.03373	1.81925
	0.805185	1.27777	0.95952	0.889697	1.71563	0.0141181
	1.49496	0.714921	1.231	0.727864	0.725732	1.36778
	0.256558	1.13275	0.984177	1.64079	0.717052	0.924722
	1.28454	1.43767	0.773229	1.81039	0.759039	0.594495
	1.13159	1.59958	1.93881	1.43654	0.810912	0.642928
	0.987191	0.79743	0.71207	1.38178	0.056187	1.39872
	1.49662	0.415111	0.972076	1.71076	0.70732	0.866119
	1.76399	0.596589	0.168139	1.81344	1.0033	1.15141
	0.228494	0.689781	1.29245	1.70984	0.678764	1.93881
	1.02976	0.970177	1.02062	1.22949	0.827809	1.3588
	0.046456	1.32789	1.62432	1.50212	0.7727	0.932761
	1.19981	0.728377	0.794108	1.28804	0.694865	1.98233
	1.52949	0.728531	0.118569	1.22625	1.17125	1.7
	1.90244	1.52753	0.0260489	0.608765	1.13073	1.63807
	1.08911	1.46523	1.09192	0.87716	0.922233	0.904298
	0.489857	0.991876	0.787887	1.51953	1.08576	1.12226
	1.04402	1.07775	1.44877	0.869301	1.34176	1.26268
	1.04873	1.45223	0.911939	1.21721	1.07028	1.14442
	1.45264	1.30584	1.55149	0.620665	0.737262	1.33812
	2.01638	0.905464	1.02639	1.15905	0.501523	0.945203
	0.528358	1.22512	0.123257	1.38038	0.729713	0.291935
	1.57734	0.160575	1.40999	0.230212	0.862682	0.73917
	0.634443	1.69139	0.0510752	1.16856	1.03848	0.484959
	1.48201	1.09046	1.9933	1.04819	1.36744	0.676789
	0.939335	1.35016	1.1374	2.72512	0.974157	1.56245
	0.861855	0.583955	0.912138	1.37446	0.711685	1.64884
	1.02929	1.58169	0.657557	1.07896	1.11131	1.01503
	1.53454	0.34968	0.682669	1.87921	1.10767	0.269267
	0.871782	0.239206	0.740192	1.41659	0.460102	0.969605
	1.21241	0.568496	0.298014	0.922502	0.682719	1.93483
	1.37125	0.934764	0.381217	1.59678	0.852076	0.920745
	0.566191	0.107726	0.36656	0.812376	1.15173	1.59458
	0.705304	1.2676	0.729426	0.632057	0.682077	1.22419
	1.59436	1.18121	0.863903	0.377758	0.315474	1.39423
	0.585155	1.27392	0.8695	1.00873	0.594971	1.15848
	0.0735023	1.07798	1.52595	0.874487	0.934867	1.07917
	0.80458	1.20273	1.05639	1.69367	1.05756	0.999375
	1.09286	1.47342	0.316734	1.43018	0.96594	0.81368
	0.945412	1.05459	0.451836	1.63605	1.02472	1.14797
	0.0924348	1.74973	0.608528	2.25321	1.10086	0.941851
	0.0514198	2.28623	0.355311	1.69695	1.07462	0.870011
	0.551427	1.34731	0.345425	1.23411	0.925314	1.16115
	0.929725	1.13304	0.781325	0.628175	1.86503	0.830156
	0.431914	0.764354	0.848535	0.999791	0.917097	1.00133
	1.22533	0.910831	0.510212	0.847091	1.06794	1.51552
	0.854759	0.49649	0.854586	1.07304	0.340589	0.0232367
	0.818772	0.359874	0.334858	1.93648	0.350578	0.724057
	0.817181	0.6669	0.34605	1.47908	0.769465	1.29818
	1.15984	0.934097	1.34256	1.29059	0.570293	1.05681
	1.72011	1.0088	1.01653	0.83745	0.893574	1.40158
	1.33068	1.69067	1.24268	1.09741	0.508739	1.63219
	0.92683	0.303302	1.18413	0.440696	0.532365	1.32324
	1.06868	1.51767	1.41664	0.996036	0.97218	1.28344
	0.0668203	0.647512	1.62219	0.669571	0.397752	0.752521
	0.778584	1.05798	0.189785	1.22408	0.917765	0.525694
	1.42976	1.43757	0.842627	1.43581	0.32287	1.98642
	0.783357	0.773368	1.40445	1.64171	0.714536	1.16959
	0.681535	1.74812	1.30026	1.30758	0.821415	1.40485
	1.28091	1.55852	1.32724	1.37882	0.693119	1.30887
	1.2294	0.953408	0.0387467	0.458896	0.737802	0.939124
	0.804294	1.43511	1.23651	1.38506	0.530284	1.6212
	1.27678	0.903949	1.13908	0.495616	0.247757	0.930205
	0.403849	0.652365	1.29358	1.28963	0.58678	1.34997
	1.30526	0.475381	1.77627	0.482665	0.555656	1.63483
	0.608065	0.0958621	0.253245	0.0798025	0.759732	0.866716
	1.44036	0.943059	0.650711	1.19554	0.869333	1.42681
	1.02919	0.968302	0.384882	1.59414	0.973104	1.54981
	1.58288	0.482623	1.23879	1.54132	1.041	0.991165
	0.977486		1.84581	1.38744	0.28358	0.263443
	1.27267		0.60492	1.55354	0.997885
	0.809799		0.0726642	1.02961	0.462156
	0.739733		1.60339	1.36784	0.883534
	1.34691		1.61128	1.37631
	1.33494		1.84041	1.18915
	0.818453		0.223958	0.654394
	1.83489		1.74559
	0.727482		2.23256
	1.16341		2.01381
	0.517062		1.36059
	1.28193		1.77451
	1.2665		1.04977
	0.744347		1.13553
	1.03562		0.983638
	0.51843		0.636565
	0.97844		1.32744

## Sheet: CEP164
	+FBS			-FBS					Table Analyzed	Identify outliers of KAN659_CEP164:Cleaned data
	Rep. 1	Rep. 2	Rep. 3	Rep. 1	Rep. 2	Rep. 3			Column B	CEP164 - FBS
	0.425019	0.567319	1.18233	1.7596	1.08858	1.20979			vs.	vs.
	1.06697	0.79262	0.684115	1.6246	0.932546	0.670438			Column A	CEP164 + FBS
	0.941977	0.768997	0.4124	1.18137	1.09604	0.383705
	0.751813	0.614824	0.897582	1.65754	1.09568	1.26756			Nested t test
	1.35705	0.939229	0.374533	2.26812	0.859242	1.31969			P value	0.0662
	1.29647	0.801634	0.363055	1.70787	1.14044	1.30145			P value summary	ns
	0.776602	0.55815	1.6349	2.01954	0.945238	1.16222			Significantly different (P < 0.05)?	No
	1.10113	1.00559	1.36678	1.71893	1.12588	1.0912			One- or two-tailed P value?	Two-tailed
	0.644453	1.30332	0.767892	1.75227	1.42749	1.00668			t, df	t=2.507, df=4
	1.02234	0.727035	0.509425	1.11963	1.07356	1.1819			F, DFn, Dfd	6.287, 1, 4
	1.0356	1.05802	1.38534	1.63182	0.838882	1.43892
	0.751929	1.00989	1.07774	1.05265	1.87525	0.943118			How big is the difference?
	0.713466	0.92923	1.00174	1.61006	1.10599	0.448442			Mean of column B	1.137
	1.18271	0.899546	1.34334	1.32359	0.959381	1.15444			Mean of column A	1
	1.25958	1.0201	1.01794	0.95862	1.00513	0.384241			Difference between means (B - A) ± SEM	0.1368 ± 0.05455
	1.01396	0.984973	0.0805598	1.10956	1.47194	0.415725			95% confidence interval	-0.01468 to 0.2882
	0.716084	0.717502	0.868351	1.91462	1.03191	1.24669
	1.09077	0.704499	1.43189	1.44264	0.783554	1.76942			Random effects	SD	Variance
	0.741804	0.934359	1.11507	0.730748	0.710457	1.23403			Variation within subcolumns	0.3897	0.1519
	1.04788	1.47277	0.66443	1.34378	1.31963	1.09539			Variation among subcolumn means	0.05516	0.003043
	1.31573	0.925759	0.910669	1.01245	0.961039	0.884012
	0.881693	0.623062	1.06712	1.81011	1.23442	1.12896			Do the subcolumns differ (within each column)?
	1.39114	0.885144	1.25855	0.822921	1.12044	0.767249			Chi-square, df	3.719, 1
	0.948727	0.562449	0.856015	1.1439	1.19649	0.783286			P value	0.0538
	1.22984	0.78946	0.964733	2.65509	1.06641	0.778137			P value summary	ns
	0.930339	0.184841	0.896134	1.31364	1.69486	1.15927			Is there significant difference between subcolumns (P < 0.05)?	No
	1.57718	1.57757	0.751695	0.596388	1.34725	0.272466
	0.270757	0.482255	0.912117	2.28128	1.29337	1.13363			Data analyzed
	1.34756	1.12138	0.982647	1.45143	1.15893	0.419694			Number of treatments (columns)	2
	1.1066	1.20188	1.10359	1.31474	1.36963	0.0978302			Number of subjects (subcolumns)	6
	1.17846	0.10532	0.140846	1.2544	0.764334	0.69924			Total number of values	660
	0.898684	1.10024	1.60256	1.15873	1.09501	1.03355
	1.56926	1.97114	1.71702	0.89624	1.04647	1.72817
	0.790335	1.00911	0.950412	1.19859	1.57213	1.30097
	1.54093	1.55675	0.0758935	0.877212	1.71351	1.308
	0.61658	1.41817	0.203867	0.714746	1.44578	1.30274
	1.14407	1.39025	1.27035	1.10922	1.06755	1.08874
	0.589289	1.2827	0.040119	1.09001	1.01802	0.659121
	0.561416	0.820077	0.74381	1.34	1.41076	1.50972
	0.769037	0.597573	1.1221	0.312596	0.640727	0.971974
	1.13837	1.27923	0.0285875	1.76112	0.703567	1.16608
	1.83071	1.16857	0.7621	1.41669	0.904986	1.58352
	1.38183	0.902395	1.57762	1.30002	0.755994	1.59183
	1.09449	0.889599	1.64724	0.81588	1.00787	0.983881
	0.890247	1.37792	1.27925	1.13301	1.07366	0.811498
	0.932842	1.02714	1.4003	1.56077	1.01761	0.971491
	0.80785	1.46769	1.6474	0.824143	0.675281	1.06787
	0.912359	1.32917	0.548954	0.887337	1.5267	0.367883
	0.847477	1.38605	0.948106	1.41849	0.956791	0.99568
	0.664819	0.314458	1.08949	0.943839	1.3444	0.955561
	1.1777	1.38869	0.799376	0.561358	1.31207	0.54402
	1.60092	0.761589	1.3523	0.763102	0.82132	1.67406
	1.0711	0.790962	1.18303	0.766302	1.60928	1.20389
	0.530982	0.706002	0.811229	1.24823	1.25819	1.58803
	1.29659	1.29285	1.25602	2.90367	1.34947	1.06777
	0.744074	1.09356	1.15015	0.639856	0.89851	1.0483
	0.999062	0.968602	1.4991	0.75996	1.3329	0.945102
	1.65271	1.36274	1.20346	1.46051	1.00523	1.3022
	0.313585	0.101486	1.13738	1.24363	2.52618	1.31004
	1.30869	1.07558	0.0299283	1.29571	1.41029	1.00185
	0.439392	1.49935	1.34908	1.10177	0.83453	1.07232
	1.02723	0.388073	1.02185	0.259119	1.05004	1.26096
	1.04567	1.12443	1.16919	1.15193	1.20711	1.19338
	1.06371	0.96166	1.35573	0.459525	1.72947	0.893345
	0.775787	1.06159	0.332966	0.24946	1.54209	0.226393
	0.490657	1.00559	0.941992	1.18259	1.32575	1.12752
	1.83991	0.943321	1.28316	0.835257	1.30839	0.556088
	0.827634	1.52152	1.58781	0.192259	0.961401	0.770681
	1.10863	1.10754	0.703745	0.861093	0.959847	0.5607
	1.00424	1.40076	0.937433	1.46121	1.34937	0.823941
	0.896182	0.640572	0.94403	0.0438752	0.966737	0.992891
	0.949833	1.39921	0.726862	1.91375	1.23861	1.26965
	1.18597	0.613788	0.787952	1.2633	1.2482	0.961408
	0.700955	1.23265	1.39054	1.31457	0.587627	1.43243
	1.54785	1.3257	1.45635	1.76664	0.300885	0.535492
	0.881634	0.209656	1.16635	0.67058	1.28503	1.00061
	1.42763	1.39071	1.82885	1.20249	0.104906	1.2778
	0.926732	1.07299	1.03853	1.39592	1.55317	0.631767
	1.07965	1.84364	1.54785	1.43118	0.444437	1.47378
	0.494148	0.768427	0.970365	1.55233	1.03004	0.82496
	1.45568	1.02761	1.02271	2.17712	1.27047	1.60041
	1.31014	0.696055	0.0752499	1.73115	1.20717	1.28279
	1.03502	0.814534	0.516398	1.14262	1.30565	1.77918
	0.968512	1.23478	0.985436	1.36449	0.915761	1.49685
	0.931678	1.46391	0.801414	1.33441	0.979481	0.991282
	0.640263	1.60125	1.24068			0.930728
	1.40645	1.39786	0.972671			1.00512
	1.24026	1.10216	0.540802			1.02443
	0.822863	0.936172	1.48231			1.42079
	1.07692	1.2612	1.29866			0.641636
	1.01576	0.928661	1.02936			1.38094
	1.22885	0.264518	0.888196			0.597494
	1.47389	1.61845	1.02448			0.619484
	0.596853	1.09091	1.55343			0.442703
	1.4896	1.13593	0.816325			1.01258
	0.583237	1.30943	1.38968			0.920055
	0.948902	0.12283	1.32178			1.1981
	0.848059	1.31518	1.5796			0.968166
	1.31486	0.0750658	0.647321			1.16275
	0.816753	0.25483	1.30961			1.31701
	1.06447	1.71273	1.18415			1.19333
	0.561648	0.854424	0.678376			0.844805
	1.12941	1.38481				1.69079
	1.27837	1.11008				1.2298
	0.791033	1.14246				1.08713
	1.06598	0.618347				1.41446
	0.44393	0.653471				0.710503
	0.823852	0.700925				1.12408
	0.890014	0.77454				1.25307
	1.15798	1.03092				0.916408
	0.166598	0.833028				1.36158
	1.2409	1.37678				1.46118
	1.1784	1.57897				0.477673
	1.02158	0.727863				1.47561
	1.1883	1.62254				1.39435
	1.27674	1.41408				0.741021
	0.53075	0.871209				1.28595
	0.83485	1.05061				1.19928
	0.645558	1.34113				1.19038
		0.130653				4.37141
		1.67269				1.08423
		1.25047				0.974226
		1.32492				0.784412
		1.02046				0.8071
		0.328549				1.26434
		0.941405				1.2439
		0.540588				1.45673
		0.729832				2.25058
						1.18474
						0.875913
						1.07919
						1.0307
						0.804257
						1.05071
						1.22508
						1.24304
						1.33793
						1.45474
						1.16908
						0.910937
						0.984471
						0.723161
						0.878541

## Sheet: PIDD1
	+FBS			-FBS					Table Analyzed	Identify outliers of KAN678_PIDD1:Cleaned data
	Rep. 1	Rep. 2	Rep. 3	Rep. 1	Rep. 2	Rep. 3			Column B	PIDD1 -FBS
	0.20254	0.176991	1.13186	0.180488	1.47797	1.08149			vs.	vs.
	0.0929579	0.983183	2.08634	0.28973	1.45273	1.05584			Column A	PIDD1 +FBS
	0.355886	0.145364	1.64711	1.53991	0.646839	1.1669
	1.10498	0.221695	0.179571	0.737557	1.75805	1.50884			Nested t test
	0.185916	1.30523	1.61082	1.602	1.83834	0.819958			P value	<0.0001
	0.484806	0.296506	0.280932	1.04968	0.145972	1.89519			P value summary	****
	0.210343	1.23985	1.20131	0.475985	1.44969	1.73283			Significantly different (P < 0.05)?	Yes
	0.222895	2.47879	1.6055	2.64048	1.59687	1.70123			One- or two-tailed P value?	Two-tailed
	0.471914	0.295594	1.30674	1.85068	2.55086	1.92742			t, df	t=6.626, df=563
	0.296515	2.59496	0.91819	1.81438	1.71183	3.22289			F, DFn, Dfd	43.90, 1, 563
	0.392866	1.4065	1.71813	1.04391	2.26226	1.63585
	2.06848	1.22769	1.374	2.62386	1.11851	1.1597			How big is the difference?
	0.877672	0.121643	0.60003	0.765037	1.21583	1.45252			Mean of column B	1.333
	0.516018	1.01511	0.369153	2.05559	1.17872	2.53683			Mean of column A	0.9328
	0.198129	0.679683	1.54231	1.84152	0.820485	0.198967			Difference between means (B - A) ± SEM	0.4000 ± 0.06036
	1.61591	1.1766	0.259659	0.92924	1.32987	1.66745			95% confidence interval	0.2814 to 0.5185
	0.738914	0.554694	0.946972	0.237144	0.29164	1.42562
	0.319585	2.62659	1.31143	0.896332	0.42636	2.37447			Random effects	SD	Variance
	0.446469	0.745066	0.77616	2.95905	1.62364	1.72251			Variation within subcolumns	0.7172	0.5143
	0.364368	0.937871	0.168934	1.55755	0.801934	1.93524			Variation among subcolumn means	0	0
	0.134687	0.0669039	1.70968	0.761984	0.977101	0.887532
	1.10226	0.714959	2.01689	0.411186	2.50221	0.151102			Do the subcolumns differ (within each column)?
	0.27141	0.389563	4.11731	1.82523	0.734422	2.16361			Chi-square, df
	0.0529249	2.78259	2.63632	0.328745	0.811362	1.31268			P value
	1.19319	1.37062	1.25575	1.62439	0.631329	1.92398			P value summary
	1.03916	1.20032	1.24104	1.06325	1.92835	0.160175			Is there significant difference between subcolumns (P < 0.05)?	No
	0.568943	0.711006	1.17628	0.895314	0.439437	2.13108
	1.91446	1.16565	0.520881	3.07134	1.06164	0.509306			Data analyzed
	0.325013	1.38886	1.13092	0.412882	0.874312	1.1328			Number of treatments (columns)	2
	0.140455	1.43053	0.107618	1.41846	1.53788	2.37916			Number of subjects (subcolumns)	6
	2.63471	0.165131	0.163929	2.05084	1.20792	1.56139			Total number of values	565
	0.122474	0.232035	0.370717	1.72786	0.700058	1.3205
	3.15005	0.124989	0.434537	1.8958	2.35532	0.570936
	2.61436	0.172125	0.806193	0.324335	3.0572	1.79102
	1.17962	0.121643	0.868761	2.24829	1.57498	2.94947
	2.1516	0.201016	0.365086	1.35196	0.812578	0.402627
	2.71953	0.671168	0.853432	0.523143	0.900466	1.46066
	3.25047	1.23833	1.31581	0.308729	2.06216	0.144533
	1.42388	0.322355	0.830594	1.94194	1.70575	1.33177
	0.374207	1.79181	1.77037	0.319585	0.945778	0.142656
	0.97063	1.23407	1.78633	1.18979	0.440957	1.34459
	1.61998	0.603351	0.865946	0.714148	0.535231	0.866258
	1.00897	1.01055	2.35257	2.26627	0.889214	0.690441
	0.428489	1.46367	0.942905	0.714826	1.95785	0.879085
	0.764698	0.533407	1.21758	0.875637	0.595445	1.39934
	0.983183	1.33048	2.21648	2.2086	2.28416	0.59565
	0.290748	1.56221	2.09041	3.94732	0.52033	1.78507
	1.01914	0.16361	2.03097	0.983861	0.865797	1.79446
	1.83473	1.70301	0.68043	0.819997	1.08111	1.69404
	0.67174	0.541922	0.0403566	1.08734	0.953989	1.01955
	0.633403	1.17568	0.0675738	0.873262	1.48283	1.46723
	1.15417	0.477146	0.0813388	0.112635	1.44877	1.19287
	1.5925	0.250586	0.695447	0.17947	0.450993	0.897855
	0.660205	0.127726	1.0305	1.2132	1.10179	0.561238
	1.15146	2.17255	1.27733	0.288712	1.64675	1.52573
	1.41812	0.302284	1.05647	0.39083	2.05608	1.26263
	0.655116	0.537056	0.300328	1.24679	2.2796	1.33646
	0.354869	0.718	0.338182	2.16144	2.63966	1.47567
	0.797945	1.18572	0.723603	1.19081	0.490831	0.113249
	0.18422	0.679075	0.550601	0.168953	1.11304	1.68215
	1.526	0.783992	0.882526	1.77061	2.11903	0.238698
	0.731789	1.85628	0.249022	0.706684	1.03944	1.83575
	1.77163	0.860931	1.98154	2.82232	1.31618	2.28875
	1.74618	1.54487	1.206	3.25522	0.756926	1.56045
	1.08768	2.27047	1.64117	0.683614	1.17447	1.88706
	0.29448	2.06733	0.246206	1.42863	1.77812	3.14312
	0.0858334	2.60408	2.03503	1.87205	1.08932	2.28343
	1.4093	0.334824	0.342874	3.41061	2.37296	2.39887
	0.647313	1.62881	1.2326	1.13382	1.19819	2.22837
	1.0412	0.0869751	0.931642	1.6729	2.28842	1.35398
	1.2339	1.32804	0.138902	0.272767	2.68376	0.346003
	0.122474	2.02597	0.894101	0.292105	1.33808	0.442045
	0.201861	1.32439	2.28687	0.221199	0.386826	0.235883
	1.99554	1.03002	0.333176	0.971987	0.950948	1.3643
	0.166239	1.4801	0.655403	0.982165	0.630417	3.16471
	1.13178	0.699146	0.224307	0.690399	1.65891	1.72188
	1.58673	0.53736	3.23854	1.80386	1.49895	1.00141
	3.86047	0.534319	5.77506	1.87375	0.796765	2.55685
	3.32783	0.451905	0.301892	1.24102	2.24888	1.80916
	5.09878	2.07432	0.237447	0.596423	2.20965	0.800562
	0.374207	1.8058	0.167683	1.87375	1.7836	1.09964
	2.2829	1.36758	0.609103	1.66205	0.333607	1.91428
	1.35671	1.91984	1.21789	1.84627	1.72734	0.679179
	0.117046	0.450385	0.216486	0.828818	1.42566	0.662598
	1.60946	1.36514	0.813075	1.65424	1.04644	1.17691
	1.11753	0.208314	0.139215	0.756216		1.3593
	1.19183	0.0954901	0.79712	2.0868		2.04223
	0.378278		1.07492	1.48088		1.47912
	0.812873		1.36462	0.159114		1.9465
	0.370475		0.646956	2.65168		1.90677
	1.1406		0.190208	0.19304		1.67683
	1.17351		0.156421	0.355886		1.57359
	0.108903		0.533708	0.336548		1.35961
	0.301265		0.200844			1.3546
	0.273785		0.342249			0.0960424
	1.25968		1.56264			1.48975
	1.17826		0.0569372			0.774283
	0.447487		1.00109
	0.680561		2.061
	0.147579		0.137337
	1.08394		0.672297
	1.78316		1.06867
	0.562158		0.152667
	1.05171
	0.254108
	1.09005
	0.0600495

## Sheet: SCLT1
	+FBS			-FBS					Table Analyzed	Identify outliers of KAN651_SCLT1:Cleaned data
	Rep. 1	Rep. 2	Rep. 3	Rep. 1	Rep. 2	Rep. 3			Column B	SCLT1 -FBS
	0.239086	0.614638	1.12595	0.737737	0.391065	1.09397			vs.	vs.
	0.910537	1.48708	0.878216	0.425874	0.11535	0.872473			Column A	SCLT1 +FBS
	1.09102	1.30308	0.467091	0.83456	0.934711	0.108778
	0.80896	1.08701	0.633072	0.593371	0.803981	0.781825			Nested t test
	0.959543	1.05841	1.09892	0.554149	0.802668	0.216992			P value	0.001
	0.390857	0.593913	0.978661	0.684069	0.769188	1.08902			P value summary	**
	1.47429	0.68835	0.288385	0.2464	0.663873	0.96177			Significantly different (P < 0.05)?	Yes
	1.28914	1.09057	0.275322	0.56256	0.842431	0.357863			One- or two-tailed P value?	Two-tailed
	1.15099	0.945965	1.16176	0.78336	0.683098	0.792973			t, df	t=8.548, df=4
	1.05829	1.51465	1.20173	0.391314	0.557057	0.960419			F, DFn, Dfd	73.07, 1, 4
	0.828343	2.18171	0.571815	0.763337	1.16476	0.780136
	0.777783	1.02718	0.379596	0.266149	0.833616	0.278588			How big is the difference?
	1.26171	0.668281	0.157424	0.197669	0.823019	0.811103			Mean of column B	0.6421
	0.325211	1.23406	1.72715	0.397623	0.763468	0.552446			Mean of column A	0.9756
	0.301166	2.73033	1.15466	0.842697	0.576844	1.12516			Difference between means (B - A) ± SEM	-0.3335 ± 0.03901
	0.371383	1.63375	0.386014	0.254446	0.217383	0.187489			95% confidence interval	-0.4418 to -0.2252
	0.303269	1.31677	1.22538	0.863726	0.172369	0.218569
	0.806034	0.284155	0.422048	1.47163	0.506134	0.626429			Random effects	SD	Variance
	0.997211	0.824238	2.44536	0.715977	0.191688	1.10309			Variation within subcolumns	0.4578	0.2096
	0.99136	0.250582	1.19419	0.467566	0.533424	0.56731			Variation among subcolumn means	0.01668	0.0002781
	2.44014	1.42396	3.54451	0.468206	0.831271	0.25145
	1.14075	0.205661	1.54879	0.636617	1.1052	0.381848			Do the subcolumns differ (within each column)?
	1.072	0.29569	0.273183	0.304274	0.92599	0.484094			Chi-square, df	0.03234, 1
	0.848366	0.525546	2.12601	0.403291	0.102971	0.157649			P value	0.8573
	1.17531	0.673532	1.17077	0.353189	0.0770876	0.147514			P value summary	ns
	0.818743	2.8861	0.66539	0.557714	0.802199	0.0676764			Is there significant difference between subcolumns (P < 0.05)?	No
	0.544731	0.760373	1.09994	0.705097	1.19261	0.626879
	1.51479	0.564747	0.606047	0.68928	1.19908	1.25826			Data analyzed
	1.59525	1.32052	0.549744	0.622263	0.821612	1.13417			Number of treatments (columns)	2
	1.24453	0.691726	1.32605	1.26903	0.628236	0.54524			Number of subjects (subcolumns)	6
	0.627566	0.782599	1.17234	0.689006	0.801449	0.367772			Total number of values	642
	0.134583	0.243548	0.139294	0.611109	0.972599	0.101458
	0.83456	0.635739	0.642081	0.65856	0.7841	0.639716
	0.819566	1.13437	0.622375	0.357303	0.500038	0.794775
	1.39794	1.56904	1.45972	0.755017	0.177902	0.494567
	1.54523	0.199659	1.33382	0.917577	0.717703	0.342999
	0.434011	0.1523	2.06115	0.439131	0.600946	0.791059
	1.02318	0.440863	0.539046	0.451017	0.148173	0.251562
	1.83205	0.287438	2.57339	0.826697	0.946715	0.576544
	1.54222	7.4791	1.78819	0.942994	0.23492	0.217218
	1.31557	2.59294	1.45994	0.384183	0.580408	0.952649
	0.620617	2.45105	0.729576	0.416549	0.103628	0.441191
	0.270446	0.242423	0.256742	0.259749	0.607417	0.816846
	0.188617	1.17676	1.50667	0.807589	0.930866	0.61179
	1.15493	1.55282	0.210011	0.390217	0.142171	0.875626
	0.504594	1.07294	1.57457	0.58048	0.715265	0.21688
	0.712869	0.820862	1.14194	1.02098	0.201066	0.911097
	1.41595	1.49317	0.606385	0.396251	1.16597	0.932943
	0.447269	0.521701	1.01751	0.677394	0.335266	0.841844
	1.03817	0.610981	0.391194	0.91072	1.14384	1.09442
	1.86039	0.347926	1.16379	0.90944	0.796948	1.03891
	0.811794	0.621672	1.89561	0.220434	0.895511	1.09262
	1.03269	0.955906	0.737121	0.840594	0.152112	0.638478
	0.87744	0.955437	1.05005	0.686354	0.513355	0.649963
	0.685989	0.649993	0.74658	0.964937	0.589786	0.588593
	1.04494	1.02971	0.804347	0.772206	0.487659	0.842858
	1.23035	0.220478	0.0929002	0.615589	0.430641	1.15647
	0.16512	0.200315	1.32549	0.224914	0.202754	0.966274
	1.21728	0.493192	1.69472	1.31145	0.132981	0.659197
	1.01669	1.19026	0.313608	0.807589	0.774346	0.899949
	1.07337	0.106535	0.9799	0.467109	1.20217	1.06357
	0.953143	0.48794	1.73098	0.768366	0.883319	0.913575
	1.47182	1.82572	0.562243	0.356937	0.553962	0.541974
	1.14807	2.10331	0.576657	0.778606	0.999889	0.481955
	1.39694	0.151362	0.478014	0.745691	0.994543	0.633185
	0.670537	0.0959376	1.27234	0.58304	0.558557	0.709645
	1.09833	0.356648	1.39925	0.510629	0.746118	0.334215
	0.878629	0.765719	0.566184	0.475611	0.515418	1.1684
	1.25824	1.15885	0.95659	0.77568	0.674751	0.0880581
	0.86144	0.705136	0.365295	1.08992	0.420606	0.797478
	0.876434	1.06985	0.249873	0.178651	0.449303	1.49947
	0.893897	0.407383	1.06199	0.195291	0.11038	0.58544
	0.713691	0.242142	0.6887	0.113371	0.0652713	0.838016
	0.0670171	0.698665	0.204268	0.355474	0.181653	0.956703
	1.14231	1.00467	1.65948	0.296046	0.233139	0.305726
	0.175726	0.883601	1.46568	0.679406	0.733271	0.827769
	0.873143	0.748182	0.316424	0.251703	0.322511	1.07325
	1.56334	0.732239	1.0585	0.143634	1.15613	1.11537
	1.30688	2.31	1.96836	0.848366	0.689287	0.565396
	2.4032	0.496099	1.42627	0.736457	0.675783	0.246045
	0.505143	1.6165	1.3917	0.222446	0.938931	0.496819
	2.44626	1.18876	0.607511	0.190537	0.763187	1.16221
	1.43826	0.121915	0.67271	0.384823	1.00195	0.864028
	1.17266	1.37754	2.90716	0.269257	0.430265	0.725635
	0.629303	0.95056	1.15635		0.35918	0.710996
	1.40965	0.793665	1.17234		0.422106	0.518327
	1.37234	1.25929	0.315748		0.478656	0.925173
	1.14222	1.36985	0.23546			1.01222
	0.506971	1.07201	1.5909			1.76398
	1.80992	0.513824	0.284669			0.762344
	1.41531	1.54035	0.667305			0.152356
	1.39575	1.04612	1.42312			1.18214
	1.10464	0.709638	1.2604			0.898598
	1.85271	1.53359	1.04116			0.970779
	1.14359	1.16991	1.13327			3.25488
	1.43707	1.72153	1.49935			0.666517
	0.595017	1.38917	1.27223			1.05557
	1.05865	1.21962	1.4998			0.791397
	0.170057	1.55835	1.39271			0.704127
	0.499657	0.185123	1.10962			0.833174
	1.21627	1.05888	1.39316			0.866167
	0.478903	1.53181	0.213164			0.635662
	1.21737	0.96519	0.921908			0.937672
	0.916023	0.999139	0.406621
	0.879269	0.867939	0.950622
	0.907063	0.569061	0.864478
	0.646126	1.1098	0.613029
	1.53518	0.60376	1.11131
	1.45317	0.691257	1.31412
	0.35008	1.49468	0.537019
	2.31314	1.47808	0.327909
	1.31246	0.48991	0.818197
	1.33669	0.734583	0.741174
	0.309943	0.493005	0.433422
	1.09705	1.26744
	1.21874	1.02118
	1.09705	0.946715
	1.30578	0.344175
	0.611017	0.191406
	0.384731	1.08335
	0.673097	1.24672
	0.966126	0.179309
	1.43662	0.43186
	0.741486	1.13887
	1.33614	0.735896
	0.930377	0.954499
	0.384731	1.57889
	0.48064	0.983759
		1.11374

## Sheet: CEP89
	+FBS			-FBS					Table Analyzed	Identify outliers of KAN650_CEP89:Cleaned data
	Rep. 1	Rep. 2	Rep. 3	Rep. 1	Rep. 2	Rep. 3			Column B	CEP89 -FBS
	1.21381	2.54984	0.775284	1.63584	0.960215	2.33017			vs.	vs.
	1.27803	0.419364	1.16042	1.78011	1.29442	1.55205			Column A	CEP89 +FBS
	1.43964	0.151818	0.352856	1.46851	2.17127	2.33983
	1.08714	1.02728	1.58513	1.30169	1.78832	2.229			Nested t test
	1.16457	0.3261	0.935797	3.65473	1.30505	2.42623			P value	0.0476
	0.0985628	0.976435	1.18202	1.59981	1.05543	2.13158			P value summary	*
	0.829998	0.578967	1.54579	1.29209	1.91435	1.94855			Significantly different (P < 0.05)?	Yes
	1.30724	1.05502	0.287378	1.19168	2.05514	2.64028			One- or two-tailed P value?	Two-tailed
	1.16491	1.41413	0.281467	1.35682	1.2117	1.39994			t, df	t=2.824, df=4
	0.631862	1.16629	0.300792	1.17939	2.16721	1.7869			F, DFn, Dfd	7.974, 1, 4
	1.45243	0.453912	1.12939	0.992025	1.32224	1.294
	0.632956	1.07594	0.798019	1.66597	1.56862	1.80157			How big is the difference?
	0.912484	0.975137	0.235995	1.33342	1.84201	2.62767			Mean of column B	1.639
	0.225743	0.344266	0.662174	1.07039	0.167956	4.29271			Mean of column A	0.9875
	0.973844	0.737354	0.288856	1.05035	1.07894	2.54468			Difference between means (B - A) ± SEM	0.6519 ± 0.2309
	0.844391	0.99825	0.291584	0.956168	1.90316	3.70067			95% confidence interval	0.01094 to 1.293
	1.1554	1.69092	0.408331	1.02022	1.2233	1.83954
	0.388107	1.04375	0.674679	1.50075	0.821778	2.15045			Random effects	SD	Variance
	1.46641	0.969622	1.06982	1.59603	1.41575	2.14067			Variation within subcolumns	0.5229	0.2734
	0.944132	0.848136	1.26774	3.00797	1.11333	1.57228			Variation among subcolumn means	0.276	0.0762
	1.54797	1.16345	1.05709	1.2968	2.63735	1.51692
	0.314458	0.816994	1.73745	0.946573	3.42198	2.64063			Do the subcolumns differ (within each column)?
	1.38518	0.924612	0.60147	2.3597	2.70125	1.58331			Chi-square, df	55.21, 1
	0.72285	0.278819	1.59274	0.908276	1.86196	2.7983			P value	<0.0001
	0.80744	0.860138	1.30389	0.972245	1.92813	2.41907			P value summary	****
	0.94632	0.783905	1.80111	0.754077	1.23774	2.2041			Is there significant difference between subcolumns (P < 0.05)?	Yes
	0.197799	2.08449	1.30787	1.62826	1.21316	1.12314
	0.937146	1.27026	0.688206	0.85769	1.09265	2.42555			Data analyzed
	1.03386	1.11998	0.936138	0.998926	0.961188	1.45735			Number of treatments (columns)	2
	1.41523	0.469646	0.473128	1.0368	2.1999	3.01122			Number of subjects (subcolumns)	6
	0.715864	1.4773	0.296586	1.53568	1.93341	2.66916			Total number of values	460
	0.889422	1.90851	1.55909	0.975443	1.46984	3.38146
	0.843128	0.479864	0.728562	1.62911	2.50483	1.69528
	1.17274	0.417256	2.10486	1.58609	2.17297	1.82317
	0.423879	0.762738	1.58876	1.3872	2.23883	1.37175
	1.23401	0.52528	1.33401	1.7222	2.72542	1.88137
	1.33123	0.971244	0.0816208	1.1676	1.13807	2.09804
	0.667971	1.23344	0.93125	1.0719	1.2293	3.1208
	1.28241	1.04196	0.897033	1.03411	1.40172	1.47622
	0.991099	0.833862	1.3015	1.11407	1.51931	0.880663
	0.930328	0.957457	0.877253	0.74162	0.936939	1.7927
	1.24235	0.103888	1.609	1.18191	1.99618	2.09713
	0.631862	0.77174	0.847242	1.20826	2.33525	2.22149
	0.160512	0.582779	2.22127	1.50975	1.85547	2.74089
	1.82253	0.750736	1.27535	1.08503	1.1126	3.03236
	1.03403	0.725514	1.25626	0.790775	1.22922	2.68667
	1.23704	1.18226	0.652512	1.61118	1.26223	2.42953
	1.09496	0.671096	0.666949	1.07055	1.03126	1.54284
	0.928729	1.3031	1.57637	1.10835	1.63683	0.897601
	0.880079	1.22946	0.923406	0.628327	1.9154	2.56605
	1.47019	0.586347	1.69983	1.73356	1.04131	2.66586
	0.989331	0.579292	1.25387	1.06534	1.56594	1.30025
	0.749952	1.15007	0.861338	1.16971	1.85085	1.30036
	1.5531	0.939453	0.775397	1.03975	1.60349	1.11393
	0.881005	0.641252	0.953758		1.69408	2.46761
	0.850451	0.631763	0.921587		2.07184	2.04905
	0.784125	1.13352	0.614657		1.57284	1.76087
	1.54544	1.05607	0.847583		1.95068	1.50703
	1.4473	0.723	1.21135		1.08827	1.67914
	1.13545	0.471349	0.505412		1.43513	3.05839
	1.55958	1.2662	0.325574		1.62612	1.09347
	0.949519	1.65605	2.23491		1.01998	2.06144
		0.908879	0.421632		0.895092	1.81748
		1.25477	1.37596		1.54632	2.27754
		1.54754	1.0189		1.59733	0.881118
		1.30635	0.793131		0.999142	0.412651
		0.959809	1.26933		2.43354	2.59197
		0.90969	0.96524		2.8954	1.8176
		0.18077	0.228947		1.02088	1.25557
		0.557557	1.07892		1.3503	1.17759
		0.579616	1.40608		2.17305	2.57844
		0.783013	0.243953		1.47868	2.18853
		1.16045	0.309545		1.32849	2.08258
		1.60041	1.69255			2.2099
		1.66067	0.628298			1.44291
		1.37366	0.853267			3.00621
		0.933209	0.311137			3.02418
		0.720972	0.815753			1.5666
		2.04402	0.187228			1.32139
		0.955106	1.4993
		1.20473	0.231789
		1.38574	2.29084
		1.39839	1.94026
		1.49709	1.60059
		1.67575	0.889189
		0.211831	0.922838
		1.02696	1.17941
		1.16823	1.49077
		0.226348	2.13817
		1.53732	1.17782
		0.531443	0.972288
		1.15331	0.711169
		1.4992	0.279079
		0.907744	1.81942
		0.495192	0.590443
		0.770767
		0.473944
		0.700697
		0.753006

## Sheet: LRRC45
	+FBS			-FBS					Table Analyzed	Identify outliers of KAN652_LRRC45:Cleaned data
	Rep. 1	Rep. 2	Rep. 3	Rep. 1	Rep. 2	Rep. 3			Column B	LRRC45 -FBS
	0.938727	1.72257	0.636033	0.361238	0.337909	0.529056			vs.	vs.
	0.964288	0.542992	0.465177	0.971797	0.589166	0.677136			Column A	LRRC45 +FBS
	1.04263	0.701242	0.777518	1.30076	1.12712	0.925905
	0.616335	1.58799	1.8989	0.887173	1.33804	0.790785			Nested t test
	0.828038	1.15254	0.314182	0.794391	1.1901	0.960337			P value	0.2585
	0.810781	0.349598	0.183126	0.806016	0.902892	0.673379			P value summary	ns
	1.11498	0.653314	1.83172	0.881253	1.22911	1.16041			Significantly different (P < 0.05)?	No
	0.612364	1.85875	1.67037	0.978295	1.0092	1.17023			One- or two-tailed P value?	Two-tailed
	1.17447	1.24022	0.614561	1.11686	0.969231	0.799757			t, df	t=1.316, df=4
	1.34596	1.09431	1.94828	0.664062	0.718996	0.543166			F, DFn, Dfd	1.732, 1, 4
	1.07036	0.969085	0.698685	0.692872	0.309415	0.690096
	0.632509	1.7561	1.6091	1.16754	1.08321	0.590021			How big is the difference?
	1.24235	1.80125	1.27889	1.01396	1.2042	0.449226			Mean of column B	0.9133
	1.07093	1.66485	0.966549	1.12184	1.18286	0.957577			Mean of column A	1
	0.684063	1.16124	0.870768	1.20769	0.828954	0.945307			Difference between means (B - A) ± SEM	-0.08671 ± 0.06589
	0.889773	0.736677	0.825063	1.35585	0.775911	0.558963			95% confidence interval	-0.2696 to 0.09622
	0.645434	1.22166	0.737565	0.931579	1.42265	0.83649
	1.11613	0.83173	1.00957	0.963638	0.672749	0.820232			Random effects	SD	Variance
	1.27303	1.58412	1.83624	0.953962	1.23057	0.527676			Variation within subcolumns	0.3727	0.1389
	1.11187	1.26805	0.982653	1.30856	1.0767	0.116179			Variation among subcolumn means	0.06983	0.004876
	1.45145	0.854963	0.702213	0.981256	1.07919	0.365332
	0.679947	1.20303	0.452447	1.18191	0.915093	0.693317			Do the subcolumns differ (within each column)?
	0.434958	0.715709	0.407585	1.04472	0.866507	0.344473			Chi-square, df	5.890, 1
	0.829338	1.31262	0.819925	0.400806	0.701827	0.722995			P value	0.0152
	1.29051	0.501347	1.06731	0.0373296	1.31247	0.81218			P value summary	*
	1.32047	0.84437	1.29139	1.34329	1.4087	0.496618			Is there significant difference between subcolumns (P < 0.05)?	Yes
	1.57391	0.984647	0.424763	1.15245	0.925687	0.457661
	1.04978	0.82552	0.884188	1.42748	0.997652	0.838023			Data analyzed
	0.902048	0.751801	0.0828208	1.00118	0.914435	0.681584			Number of treatments (columns)	2
	0.604061	0.825081	0.799297	1.44582	1.04704	1.1009			Number of subjects (subcolumns)	6
	0.879448	0.511941	0.545773	0.991003	1.18476	0.375071			Total number of values	527
	0.555467	1.30692	0.623763	1.35239	1.0805	0.894081
	0.945948	0.828369	1.14569	1.13953	0.735362	0.387187
	1.28141	1.02666	0.635496	1.02429	0.908517	0.522998
	1.34849	1.12734	0.851443	1.22877	1.02534	0.738792
	0.749336	0.853648	0.978128	1.09462	0.842543	0.559424
	1.15202	1.21421	1.53663	1.13426	0.998018	0.404901
	1.39831	1.43149	1.51432	1.144	0.565421	0.235886
	0.907896	1.24548	0.149384	1.18292	0.879293	0.745233
	1.15895	1.98245	1.19438	1.11296	1.21676	0.3582
	0.632726	1.05318	0.790631	0.90638	1.26023	0.582429
	0.289611	1.08189	1.49499	1.06913	1.14838	1.27713
	0.958078	0.645497	1.56961	0.601895	0.998602	0.981733
	0.780383	0.817483	1.52827	1.60373	0.512744	0.456818
	1.06783	1.0987	1.08073	0.906019	0.559211	0.279597
	1.20198	1.10892	0.864403	1.3469	0.423098	0.940246
	1.44329	1.29414	0.812794	1.45383	0.70285	1.16509
	1.17317	0.493968	0.779205	1.24278	0.816022	1.15688
	1.64756	1.03959	1.79353	0.773091	0.772477	0.723761
	1.07281	0.537147	1.50772	0.836631	1.19945	1.29354
	1.6542	0.775034	0.101225	1.0136	1.22451	1.01233
	1.19346	0.903403	1.00044	0.904286	1.17344	1.05842
	0.0629621	0.742668	1.04584	1.35874	0.874909	0.542706
	0.802045	0.832388	1.36255	1.60994	0.760714	0.703133
	0.669117	1.17789	1.41294	1.37672	0.957322	0.679897
	0.71049	0.825008	0.78396	1.15772	0.546426	0.362341
	0.628177	0.698539	0.868774	0.898221	0.781318	1.08833
	0.87952	1.2633	0.821152	0.808615	0.57375	0.782349
	0.871938	1.03513	1.14277	0.535683	1.00437	0.838637
	1.04696	0.948336	1.31647	0.877065	1.34513	0.790785
	1.72893	1.50872	2.27059	1.05194	0.838013	1.06731
	1.29426	0.772623	1.04615		0.678593	0.966549
	1.6573	1.3094	2.7077		0.93723	1.09745
	1.47874	1.15167	1.42689		0.737335	0.816321
	0.955768	1.22611	0.805815		0.963752	1.72283
	0.964937	0.551978	0.297618		0.537585	0.699145
	1.29592	0.0387956	0.669928		1.1673	1.26984
	1.28516	0.89785	0.5993		0.62577	0.85037
	0.612581	0.228755	0.126685		0.734485	0.958037
	0.307012	0.828954	0.924065		0.906253	0.710341
	0.650488	1.00664	1.01747		0.647835	0.827671
	0.8471	2.13514	1.34453		0.812588	1.25842
	1.03519	0.632346	1.03557			0.890937
	1.03469	0.681443	1.65059			0.888253
	0.774752	1.49301	1.0473			0.895078
	0.846017	2.17883	0.545083			0.746767
	0.909051	1.26491	0.285732			0.689636
	1.28502	1.37954	1.76631			1.11678
	0.746953	1.07568	1.38088			1.0838
	1.03873	0.606409	1.22291			0.821459
	0.753668	1.43514	0.0361957			1.41846
	1.40156	0.520343	1.14308			0.922991
	0.285423	0.698174	0.42668			1.35282
	0.707096	1.00028	0.878744			1.11701
	1.31867	0.796222	0.597306			1.13296
	1.81882	1.01	1.40696			0.709421
	1.40813	1.84648				1.01985
	0.806738	1.21822				0.941473
	1.80193	1.24803				0.795079
	0.93064	0.984428				0.75919
	0.881686	0.476433				0.511648
	1.11671	0.624017				0.885108
	0.53525	0.115729				0.552445
		0.935842				0.618088
		0.0829246				0.276069
		1.31671				0.635726
		0.878489				0.628211
		0.437053				1.21424
		0.823401				2.41622
		1.42828				0.671538
		0.746906				1.10405
		0.910125				0.915783
		0.856132				0.715479
		0.0237449				1.1226
						0.814097
						0.74508
						1.19454
						0.564638
						0.767242
						0.772227
						1.1259
						0.722228
