# Supplementary material for: A hierarchical pathway for assembly of the distal appendages that organize primary cilia
Source: eLife. 2025 Jan 30;14:e85999. doi: 10.7554/eLife.85999 (PMC11984956; doi:10.7554/eLife.85999)
Supplement: Figure 2—source data 1. [file elife-85999-fig2-data1.xlsx]

## Sheet: Raw data
	Label	Area	Mean	Min	Max	X	Y	Circ	IntDen	RawIntDen	AR	Round	Solidity
529	CEP164_KAN630-1_1.tif:0001-0017	1.597	160.685	0	617	75.673	1.931	0.939	256.679	19925	1.106	0.904	0.976	0.64557
530	CEP164_KAN630-1_1.tif:0002-0425	1.726	163.194	0	636	142.694	48.221	0.922	281.709	21868	1.01	0.99	0.971	0.708523
531	CEP164_KAN630-1_1.tif:0003-0444	1.327	126.058	0	345	4.034	50.389	0.93	167.263	12984	1.335	0.749	0.976	0.420682
532	CEP164_KAN630-1_1.tif:0004-0687	2.138	180.506	0	1420	44.523	77.898	0.656	386.004	29964	1.889	0.529	0.834	0.970834
533	CEP164_KAN630-1_1.tif:0005-0714	1.971	172.399	0	1333	69.896	81.052	0.656	339.795	26377	1.857	0.538	0.818	0.854615
534	CEP164_KAN630-1_1.tif:0006-0756	1.25	129.495	0	432	4.989	85.811	0.946	161.814	12561	1.026	0.974	0.985	0.406976
535	CEP164_KAN630-1_1.tif:0007-0875	1.417	195	0	1036	95.575	99.313	0.95	276.324	21450	1.225	0.816	0.965	0.69498
536	CEP164_KAN630-1_1.tif:0008-1017	1.456	166.142	0	768	69.064	115.477	0.947	241.851	18774	1.123	0.89	0.97	0.608278
537	CEP164_KAN630-1_1.tif:0009-1086	0.902	131.671	0	804	74.57	123.318	0.947	118.736	9217	1.146	0.873	0.986	0.298631
538	CEP164_KAN630-1_1.tif:0010-1107	1.018	124.418	0	462	34.674	125.701	0.941	126.62	9829	1.064	0.94	0.988	0.31846
539	CEP164_KAN630-1_1.tif:0011-1184	1.198	140.441	0	666	142.962	134.441	0.937	168.255	13061	1.25	0.8	0.974	0.423176
540	CEP164_KAN630-1_1.tif:0012-1223	0.824	114.766	11	250	107.258	138.811	0.914	94.62	7345	1	1	1	0.237978
541	CEP164_KAN630-1_1.tif:0013-1259	1.224	198.253	0	843	132.469	142.901	0.957	242.624	18834	1.073	0.932	0.979	0.610222
542	CEP164_KAN630-1_2.tif:0001-0117	1.984	201.753	0	1438	134.647	13.311	0.886	400.252	31070	1.418	0.705	0.969	1.00667
543	CEP164_KAN630-1_2.tif:0002-0182	1.314	183.637	0	853	28.713	20.684	0.921	241.297	18731	1.102	0.908	0.967	0.606884
544	CEP164_KAN630-1_2.tif:0003-0190	1.868	142.083	0	687	123.639	21.579	0.878	265.4	20602	1.412	0.708	0.942	0.667505
545	CEP164_KAN630-1_2.tif:0004-0231	2.254	134.549	0	926	70.207	26.193	0.809	303.326	23546	1.424	0.702	0.914	0.76289
546	CEP164_KAN630-1_2.tif:0005-0249	0.812	139.476	0	558	140.86	28.255	0.937	113.196	8787	1.039	0.963	0.992	0.284699
547	CEP164_KAN630-1_2.tif:0006-0455	1.469	166.456	0	668	70.744	51.678	0.927	244.454	18976	1.049	0.953	0.974	0.614822
548	CEP164_KAN630-1_2.tif:0007-0470	1.404	146.11	0	824	33.865	53.418	0.942	205.163	15926	1.245	0.803	0.965	0.516002
549	CEP164_KAN630-1_2.tif:0008-0540	2.383	137.67	0	1525	108.163	61.26	0.796	328.098	25469	1.544	0.648	0.877	0.825196
550	CEP164_KAN630-1_2.tif:0009-0603	2.138	164.428	0	1352	124.414	68.403	0.841	351.621	27295	1.389	0.72	0.915	0.884358
551	CEP164_KAN630-1_2.tif:0010-0662	1.791	151.108	0	772	54.657	75.133	0.842	270.579	21004	1.456	0.687	0.93	0.68053
552	CEP164_KAN630-1_2.tif:0011-0722	1.314	195.902	0	1461	90.646	81.938	0.921	257.413	19982	1.355	0.738	0.976	0.647417
553	CEP164_KAN630-1_2.tif:0012-0860	1.662	155.791	0	944	68.333	97.608	0.888	258.895	20097	1.415	0.707	0.963	0.651143
554	CEP164_KAN630-1_2.tif:0013-0887	1.391	120.37	0	637	3.588	100.668	0.867	167.469	13000	1.44	0.694	0.939	0.4212
555	CEP164_KAN630-1_2.tif:0014-0904	1.726	173.709	0	1098	118.257	102.611	0.922	299.86	23277	1.396	0.716	0.982	0.754175
556	CEP164_KAN630-1_2.tif:0015-0983	0.889	101.493	0	332	22.308	111.565	0.933	90.214	7003	1.172	0.853	0.979	0.226897
557	CEP164_KAN630-1_2.tif:0016-1011	1.275	132.283	0	643	66.489	114.83	0.922	168.706	13096	1.177	0.85	0.957	0.42431
558	CEP164_KAN630-1_2.tif:0017-1090	1.095	112.518	0	387	130.36	123.701	0.929	123.206	9564	1.15	0.87	0.971	0.309874
559	CEP164_KAN630-1_2.tif:0018-1143	1.134	119.591	0	460	6.072	129.731	0.93	135.573	10524	1.126	0.888	0.989	0.340978
560	CEP164_KAN630-1_2.tif:0019-1145	0.915	118.07	0	411	4.307	130.021	0.924	107.992	8383	1.13	0.885	0.993	0.271609
561	CEP164_KAN630-1_2.tif:0020-1152	1.211	122.479	0	585	80.656	130.795	0.917	148.313	11513	1.267	0.789	0.979	0.373021
562	CEP164_KAN630-1_2.tif:0021-1268	1.224	161.021	0	715	116.301	143.984	0.897	197.06	15297	1.239	0.807	0.979	0.495623
563	CEP164_KAN630-1_3.tif:0001-0187	1.752	196.184	0	1382	120.38	21.192	0.926	343.711	26681	1.232	0.812	0.954	0.864464
564	CEP164_KAN630-1_3.tif:0002-0204	2.074	183.807	0	1380	89.155	23.172	0.908	381.224	29593	1.306	0.766	0.942	0.958813
565	CEP164_KAN630-1_3.tif:0003-0258	1.919	168.879	0	1298	26.067	29.308	0.82	324.156	25163	1.288	0.776	0.882	0.815281
566	CEP164_KAN630-1_3.tif:0004-0474	0.992	108.701	0	314	5.732	53.845	0.951	107.824	8370	1.06	0.944	0.975	0.271188
567	CEP164_KAN630-1_3.tif:0005-0513	1.739	149.326	0	973	75.248	58.183	0.894	259.693	20159	1.336	0.748	0.954	0.653152
568	CEP164_KAN630-1_3.tif:0006-0608	2.035	132.5	0	791	139.084	69.042	0.869	269.69	20935	1.435	0.697	0.924	0.678294
569	CEP164_KAN630-1_3.tif:0007-0634	1.546	136.208	0	628	62.162	72.048	0.909	210.56	16345	1.168	0.856	0.964	0.529578
570	CEP164_KAN630-1_3.tif:0008-0640	1.108	191	0	886	29.51	72.697	0.909	211.604	16426	1.379	0.725	0.989	0.532202
571	CEP164_KAN630-1_3.tif:0009-0797	1.932	112.987	0	813	33.836	90.509	0.854	218.328	16948	1.522	0.657	0.923	0.549115
572	CEP164_KAN630-1_3.tif:0010-0853	1.894	154.333	0	1142	96.028	96.892	0.837	292.26	22687	1.43	0.699	0.91	0.735059
573	CEP164_KAN630-1_3.tif:0011-0884	1.121	135.943	0	587	1.254	100.386	0.951	152.358	11827	1.114	0.897	0.983	0.383195
574	CEP164_KAN630-1_3.tif:0012-1042	1.275	134.162	0	559	111.766	118.264	0.952	171.102	13282	1.101	0.908	0.957	0.430337
575	CEP164_KAN630-1_3.tif:0013-1118	1.211	149.383	0	666	46.553	126.903	0.947	180.893	14042	1.093	0.915	0.974	0.454961
576	CEP164_KAN630-1_3.tif:0014-1211	1.469	116.193	0	498	63.586	137.401	0.83	170.638	13246	1.299	0.77	0.898	0.42917
577	CEP164_KAN630-1_4.tif:0001-0089	2.357	136.53	0	1025	81.897	10.113	0.669	321.863	24985	2	0.5	0.817	0.809514
578	CEP164_KAN630-1_4.tif:0002-0104	1.211	177.436	0	1196	84.568	11.805	0.979	214.863	16679	1.098	0.911	0.974	0.5404
579	CEP164_KAN630-1_4.tif:0003-0175	2.177	141.467	0	999	108.557	19.798	0.767	307.989	23908	1.878	0.532	0.894	0.774619
580	CEP164_KAN630-1_4.tif:0004-0474	1.121	169.805	0	705	41.024	53.804	0.889	190.31	14773	1.375	0.727	0.994	0.478645
581	CEP164_KAN630-1_4.tif:0005-0523	1.095	121.8	0	380	15.394	59.356	0.962	133.37	10353	1.139	0.878	0.977	0.335437
582	CEP164_KAN630-1_4.tif:0006-0705	2.654	110.898	0	724	117.315	80.105	0.798	294.295	22845	1.638	0.611	0.918	0.740178
583	CEP164_KAN630-1_4.tif:0007-0792	2.216	101.855	0	606	76.743	89.933	0.892	225.684	17519	1.362	0.734	0.927	0.567616
584	CEP164_KAN630-1_4.tif:0008-0888	1.507	112.325	0	664	41.237	100.859	0.775	169.299	13142	1.343	0.744	0.86	0.425801
585	CEP164_KAN630-1_4.tif:0009-1107	1.237	161.917	0	690	50.859	125.643	0.936	200.242	15544	1.049	0.953	0.98	0.503626
586	CEP164_KAN630-1_4.tif:0010-1145	2.177	103.675	0	596	86.311	130.059	0.817	225.71	17521	1.451	0.689	0.909	0.56768
587	CEP164_KAN630-1_4.tif:0011-1144	0.915	100.056	3	278	35.349	129.85	0.924	91.516	7104	1.13	0.885	0.993	0.23017
588	CEP164_KAN630-1_4.tif:0012-1147	1.211	161.606	0	758	120.834	130.227	0.917	195.694	15191	1.267	0.789	0.979	0.492188
589	CEP164_KAN630-1_4.tif:0013-1211	1.108	144.814	0	607	19.476	137.447	0.94	160.436	12454	1.13	0.885	0.977	0.40351
										17263.2				0.559327
590	CEP164_KAN630-2_1.tif:0001-0095	0.863	25.06	0	85	123.887	10.775	0.906	21.629	1679	1.219	0.82	0.964	0.0543996
591	CEP164_KAN630-2_1.tif:0002-0208	1.185	23.011	0	89	90.007	23.629	0.959	27.272	2117	1.099	0.91	0.963	0.0685908
592	CEP164_KAN630-2_1.tif:0003-0325	0.992	20.597	0	92	104.066	36.966	0.903	20.431	1586	1.456	0.687	0.939	0.0513864
593	CEP164_KAN630-2_1.tif:0004-0417	0.889	19.638	0	70	10.744	47.324	0.933	17.455	1355	1.134	0.882	0.979	0.043902
594	CEP164_KAN630-2_1.tif:0005-0490	1.288	15.64	0	46	77.208	55.635	0.932	20.148	1564	1.172	0.853	0.957	0.0506736
595	CEP164_KAN630-2_1.tif:0006-0500	0.979	13.158	0	45	115.957	56.802	0.974	12.882	1000	1.09	0.918	0.974	0.0324
596	CEP164_KAN630-2_1.tif:0007-0540	0.812	10.984	0	56	53.128	61.358	0.921	8.915	692	1.25	0.8	0.94	0.0224208
597	CEP164_KAN630-2_1.tif:0008-0654	0.786	18.738	0	61	20.751	74.224	0.945	14.724	1143	1.033	0.968	0.976	0.0370332
598	CEP164_KAN630-2_1.tif:0009-0847	0.889	13.522	0	46	27.234	96.127	0.918	12.019	933	1.433	0.698	0.939	0.0302292
599	CEP164_KAN630-2_1.tif:0010-0920	0.824	27.547	0	77	101.572	104.489	0.974	22.711	1763	1.14	0.878	0.948	0.0571212
600	CEP164_KAN630-2_2.tif:0001-0045	1.443	32.348	0	109	82.916	5.169	0.967	46.672	3623	1.061	0.943	0.97	0.117385
601	CEP164_KAN630-2_2.tif:0002-0172	0.94	21.205	0	65	39.989	19.566	0.972	19.942	1548	1.051	0.952	0.954	0.0501552
602	CEP164_KAN630-2_2.tif:0003-0192	1.237	17.688	0	64	6.879	21.812	0.954	21.874	1698	1.239	0.807	0.95	0.0550152
603	CEP164_KAN630-2_2.tif:0004-0199	0.953	44.73	0	92	74.33	22.577	0.985	42.64	3310	1.25	0.8	0.967	0.107244
604	CEP164_KAN630-2_2.tif:0005-0337	1.198	27.591	0	93	55.888	38.307	0.969	33.056	2566	1.216	0.822	0.969	0.0831384
605	CEP164_KAN630-2_2.tif:0006-0351	0.915	14.817	0	41	33.624	39.914	0.945	13.552	1052	1.017	0.984	0.94	0.0340848
606	CEP164_KAN630-2_2.tif:0007-0373	0.979	25.658	0	71	98.307	42.374	0.892	25.12	1950	1.572	0.636	0.95	0.06318
607	CEP164_KAN630-2_2.tif:0008-0510	1.353	20.219	0	59	107.951	57.859	0.965	27.349	2123	1.235	0.81	0.955	0.0687852
608	CEP164_KAN630-2_2.tif:0009-0632	0.799	11.581	0	50	79.706	71.769	0.944	9.249	718	1.303	0.767	0.939	0.0232632
609	CEP164_KAN630-2_2.tif:0010-0637	1.353	28.79	0	84	128.421	72.355	0.907	38.943	3023	1.513	0.661	0.95	0.0979452
610	CEP164_KAN630-2_2.tif:0011-0663	1.082	11.321	0	55	60.79	75.259	0.951	12.251	951	1.137	0.88	0.966	0.0308124
611	CEP164_KAN630-2_2.tif:0012-0845	1.34	23.375	0	91	93.087	95.908	0.871	31.317	2431	1.239	0.807	0.937	0.0787644
612	CEP164_KAN630-2_2.tif:0013-0958	0.863	12.537	0	47	111.961	108.71	0.906	10.821	840	1.091	0.916	0.964	0.027216
613	CEP164_KAN630-2_2.tif:0014-1049	1.056	20.598	0	75	129.743	119.153	0.928	21.758	1689	1.09	0.917	0.965	0.0547236
614	CEP164_KAN630-2_3.tif:0001-0038	0.837	21.108	0	62	134.355	4.289	0.951	17.674	1372	1.265	0.79	0.97	0.0444528
615	CEP164_KAN630-2_3.tif:0002-0119	1.211	13.777	0	59	39.764	13.488	0.966	16.683	1295	1.098	0.911	0.94	0.041958
616	CEP164_KAN630-2_3.tif:0003-0192	1.211	16.447	0	62	116.549	21.848	0.934	19.916	1546	1.302	0.768	0.94	0.0500904
617	CEP164_KAN630-2_3.tif:0004-0328	0.773	18.85	0	55	22.473	37.228	1	14.57	1131	1	1	0.968	0.0366444
618	CEP164_KAN630-2_3.tif:0005-0346	1.018	24.886	0	83	51.88	39.346	0.895	25.327	1966	1.293	0.773	0.946	0.0636984
619	CEP164_KAN630-2_3.tif:0006-0528	0.915	137.789	0	669	59.026	59.991	0.924	126.027	9783	1.13	0.885	0.993	0.316969
620	CEP164_KAN630-2_3.tif:0007-0590	0.786	29.246	0	84	92.801	67.022	0.945	22.982	1784	1.281	0.781	0.984	0.0578016
621	CEP164_KAN630-2_3.tif:0008-0641	1.082	24.095	0	74	120.413	72.829	0.951	26.074	2024	1.103	0.907	0.971	0.0655776
622	CEP164_KAN630-2_3.tif:0009-0753	1.121	22.034	0	79	86.549	85.471	0.951	24.695	1917	1.114	0.897	0.983	0.0621108
623	CEP164_KAN630-2_3.tif:0010-0871	0.902	16.571	0	83	100.561	98.875	0.897	14.943	1160	1.329	0.753	0.933	0.037584
624	CEP164_KAN630-2_3.tif:0011-0890	1.069	32.265	0	87	143.753	101.01	1	34.499	2678	1.128	0.886	0.965	0.0867672
625	CEP164_KAN630-2_3.tif:0012-0957	0.786	16.967	0	55	7.222	108.676	0.945	13.333	1035	1.281	0.781	0.984	0.033534
626	CEP164_KAN630-2_3.tif:0013-1034	0.953	16.122	0	59	73.648	117.371	0.948	15.369	1193	1.26	0.794	0.961	0.0386532
627	CEP164_KAN630-2_3.tif:0014-1046	0.773	11.3	0	49	112.376	118.721	0.969	8.734	678	1.075	0.931	0.968	0.0219672
628	CEP164_KAN630-2_3.tif:0015-1083	0.94	12.096	0	49	49.532	122.968	0.972	11.375	883	1.111	0.9	0.954	0.0286092
629	CEP164_KAN630-2_4.tif:0001-0172	1.082	9.964	0	43	117.87	19.513	0.951	10.782	837	1.122	0.891	0.966	0.0271188
630	CEP164_KAN630-2_4.tif:0002-0282	1.082	20.929	0	86	75.93	32.037	0.919	22.647	1758	1.094	0.914	0.971	0.0569592
631	CEP164_KAN630-2_4.tif:0003-0469	1.43	24.541	0	97	81.853	53.293	0.947	35.091	2724	1.315	0.76	0.941	0.0882576
632	CEP164_KAN630-2_4.tif:0004-0526	0.812	103.063	0	594	106.57	59.707	0.937	83.644	6493	1.039	0.963	0.992	0.210373
633	CEP164_KAN630-2_4.tif:0005-0606	0.85	21.318	0	75	70.788	68.793	0.928	18.125	1407	1.157	0.864	0.957	0.0455868
634	CEP164_KAN630-2_4.tif:0006-0867	0.812	159.111	0	907	55.836	98.411	0.937	129.132	10024	1.039	0.963	0.992	0.324778
635	CEP164_KAN630-2_4.tif:0007-0954	0.915	8.366	0	34	113.039	108.265	0.91	7.652	594	1.297	0.771	0.94	0.0192456
										2079.04				0.067361
636	CEP164_KAN630-3_1.tif:0001-0042	1.301	18.406	0	85	84.154	4.777	0.888	23.948	1859	1.286	0.778	0.898	0.0602316
637	CEP164_KAN630-3_1.tif:0002-0202	1.301	23.921	0	182	69.206	22.956	0.884	31.124	2416	1.21	0.827	0.962	0.0782784
638	CEP164_KAN630-3_1.tif:0003-0209	0.966	103.88	0	245	124.969	23.725	0.893	100.366	7791	1.326	0.754	0.968	0.252428
639	CEP164_KAN630-3_1.tif:0004-0233	1.198	14.269	0	58	27.008	26.44	0.969	17.095	1327	1.125	0.889	0.974	0.0429948
640	CEP164_KAN630-3_1.tif:0005-0235	1.739	152.711	0	527	128.947	26.661	0.929	265.581	20616	1.159	0.863	0.982	0.667958
641	CEP164_KAN630-3_1.tif:0006-0250	1.301	127.644	0	322	124.239	28.382	0.884	166.078	12892	1.366	0.732	0.967	0.417701
642	CEP164_KAN630-3_1.tif:0007-0293	1.649	62.664	0	410	124.701	33.26	0.748	103.329	8021	1.69	0.592	0.859	0.25988
643	CEP164_KAN630-3_1.tif:0008-0417	0.824	182.969	0	1117	129.958	47.33	0.914	150.851	11710	1	1	1	0.379404
644	CEP164_KAN630-3_1.tif:0009-0499	0.966	11.293	0	53	74.793	56.655	0.961	10.911	847	1.262	0.793	0.974	0.0274428
645	CEP164_KAN630-3_1.tif:0010-0501	0.953	20.77	0	56	35.328	56.914	0.985	19.8	1537	1.035	0.967	0.967	0.0497988
646	CEP164_KAN630-3_1.tif:0011-0576	1.211	155.266	0	747	110.236	65.348	0.917	188.016	14595	1.134	0.882	0.984	0.472878
647	CEP164_KAN630-3_1.tif:0012-0584	1.378	20.654	0	102	135.674	66.332	0.924	28.47	2210	1.224	0.817	0.951	0.071604
648	CEP164_KAN630-3_1.tif:0013-0617	0.863	19.687	0	60	46.78	70.102	0.872	16.992	1319	1.468	0.681	0.978	0.0427356
649	CEP164_KAN630-3_1.tif:0014-0652	1.688	60.252	0	366	22.277	74.022	0.773	101.68	7893	1.704	0.587	0.907	0.255733
650	CEP164_KAN630-3_1.tif:0015-0660	1.391	23.833	0	166	86.154	74.993	0.867	33.159	2574	1.305	0.766	0.923	0.0833976
651	CEP164_KAN630-3_1.tif:0016-0710	0.812	133.286	0	741	65.597	80.591	0.937	108.172	8397	1.039	0.963	0.992	0.272063
652	CEP164_KAN630-3_1.tif:0017-0737	0.812	129.921	0	791	140.292	83.656	0.937	105.441	8185	1.039	0.963	0.992	0.265194
653	CEP164_KAN630-3_1.tif:0018-0912	1.082	14.357	0	46	58.123	103.559	0.985	15.536	1206	1.121	0.892	0.971	0.0390744
654	CEP164_KAN630-3_2.tif:0001-0033	1.34	26.346	0	106	115.912	3.776	0.956	35.297	2740	1.254	0.798	0.95	0.088776
655	CEP164_KAN630-3_2.tif:0002-0035	1.237	23.177	0	111	132.417	3.981	0.894	28.663	2225	1.21	0.826	0.937	0.07209
656	CEP164_KAN630-3_2.tif:0003-0087	1.043	22.938	0	83	20.289	9.952	0.917	23.935	1858	1.091	0.916	0.953	0.0601992
657	CEP164_KAN630-3_2.tif:0004-0110	1.52	61.508	0	411	86.253	12.571	0.948	93.499	7258	1.076	0.93	0.959	0.235159
658	CEP164_KAN630-3_2.tif:0005-0120	1.262	20.255	0	80	66.502	13.67	0.943	25.571	1985	1.208	0.828	0.942	0.064314
659	CEP164_KAN630-3_2.tif:0006-0284	0.799	139.452	0	814	105.101	32.234	0.96	111.38	8646	1.081	0.925	0.984	0.28013
660	CEP164_KAN630-3_2.tif:0007-0370	1.095	191.518	0	1162	41.395	41.99	0.929	209.71	16279	1.109	0.902	0.977	0.52744
661	CEP164_KAN630-3_2.tif:0008-0372	1.533	14.95	0	76	47.895	42.287	0.956	22.918	1779	1.113	0.898	0.96	0.0576396
662	CEP164_KAN630-3_2.tif:0009-0390	2.113	62.421	0	580	24.607	44.373	0.786	131.876	10237	1.374	0.728	0.899	0.331679
663	CEP164_KAN630-3_2.tif:0010-0479	0.799	22.016	0	80	75.622	54.348	0.807	17.584	1365	1.908	0.524	0.969	0.044226
664	CEP164_KAN630-3_2.tif:0011-0510	1.366	20.113	0	84	85.569	57.846	0.888	27.465	2132	1.273	0.786	0.946	0.0690768
665	CEP164_KAN630-3_2.tif:0012-0929	1.224	16.568	0	67	14.228	105.49	0.944	20.277	1574	1.15	0.869	0.941	0.0509976
666	CEP164_KAN630-3_2.tif:0013-0980	1.172	18.934	0	89	93.898	111.246	0.948	22.196	1723	1.012	0.988	0.963	0.0558252
667	CEP164_KAN630-3_2.tif:0014-1185	0.85	13.152	0	53	66.602	134.563	0.965	11.182	868	1.195	0.837	0.964	0.0281232
668	CEP164_KAN630-3_3.tif:0001-0048	1.147	36.135	0	123	112.079	5.496	0.959	41.429	3216	1.242	0.805	0.957	0.104198
669	CEP164_KAN630-3_3.tif:0002-0055	1.404	72.908	0	396	62.941	6.227	0.85	102.375	7947	1.473	0.679	0.924	0.257483
670	CEP164_KAN630-3_3.tif:0003-0091	1.056	28.939	0	100	26.495	10.317	0.928	30.57	2373	1.246	0.802	0.965	0.0768852
671	CEP164_KAN630-3_3.tif:0004-0196	0.786	30.902	0	130	25.646	22.253	0.985	24.283	1885	1.116	0.896	0.976	0.061074
672	CEP164_KAN630-3_3.tif:0005-0303	1.353	34.286	0	100	49.662	34.442	0.935	46.376	3600	1.145	0.873	0.946	0.11664
673	CEP164_KAN630-3_3.tif:0006-0336	1.378	27.402	0	84	87.883	38.176	0.924	37.771	2932	1.08	0.926	0.947	0.0949968
674	CEP164_KAN630-3_3.tif:0007-0346	1.018	32	0	277	17.109	39.352	0.961	32.566	2528	1.262	0.793	0.952	0.0819072
675	CEP164_KAN630-3_3.tif:0008-0491	1.507	43.085	0	179	89.843	55.733	0.876	64.939	5041	1.435	0.697	0.932	0.163328
676	CEP164_KAN630-3_3.tif:0009-0514	1.507	364.598	0	3006	20.61	58.397	0.924	549.531	42658	1.041	0.961	0.983	1.38212
677	CEP164_KAN630-3_3.tif:0010-0588	1.597	96.298	0	346	132.875	66.722	0.955	153.827	11941	1.157	0.864	0.943	0.386888
678	CEP164_KAN630-3_3.tif:0011-0639	2.718	495.507	0	5873	85.092	72.567	0.87	1346.87	104552	1.353	0.739	0.944	3.38749
679	CEP164_KAN630-3_3.tif:0012-0748	1.353	47.933	0	225	47.835	84.946	0.965	64.836	5033	1.153	0.867	0.946	0.163069
680	CEP164_KAN630-3_3.tif:0013-0826	1.34	107.538	0	511	21.371	93.816	0.927	144.075	11184	1.217	0.822	0.941	0.362362
681	CEP164_KAN630-3_3.tif:0014-0915	1.082	30.583	0	115	53.913	103.921	0.919	33.095	2569	1.382	0.723	0.977	0.0832356
682	CEP164_KAN630-3_3.tif:0015-0989	0.928	45.194	0	165	94.918	112.283	0.996	41.919	3254	1.133	0.883	0.96	0.10543
683	CEP164_KAN630-3_3.tif:0016-1033	0.799	17.855	0	67	125.758	117.246	0.96	14.261	1107	1.081	0.925	0.984	0.0358668
684	CEP164_KAN630-3_3.tif:0017-1111	1.159	40.278	0	236	69.285	126.16	0.938	46.698	3625	1.306	0.766	0.963	0.11745
685	CEP164_KAN630-3_4.tif:0001-0102	0.915	20.549	0	123	11.18	11.642	0.945	18.795	1459	1.232	0.812	0.947	0.0472716
686	CEP164_KAN630-3_4.tif:0002-0143	1.34	36.567	0	213	46.805	16.26	0.927	48.991	3803	1.051	0.951	0.937	0.123217
687	CEP164_KAN630-3_4.tif:0003-0153	1.417	35.655	0	224	125.649	17.368	0.922	50.524	3922	1.184	0.845	0.961	0.127073
688	CEP164_KAN630-3_4.tif:0004-0177	1.237	28.583	0	87	73.369	20.113	0.894	35.349	2744	1.661	0.602	0.965	0.0889056
689	CEP164_KAN630-3_4.tif:0005-0220	0.992	28.974	0	92	95.335	24.977	0.951	28.74	2231	1.25	0.8	0.981	0.0722844
690	CEP164_KAN630-3_4.tif:0006-0359	1.816	66.709	0	419	125.818	40.67	0.832	121.17	9406	1.255	0.797	0.928	0.304754
691	CEP164_KAN630-3_4.tif:0007-0371	1.25	30.928	0	109	20.759	42.162	0.997	38.647	3000	1.143	0.875	0.951	0.0972
692	CEP164_KAN630-3_4.tif:0008-0436	1.069	38.024	0	108	140.614	49.473	0.895	40.656	3156	1.592	0.628	0.933	0.102254
693	CEP164_KAN630-3_4.tif:0009-0522	1.752	97.36	0	393	125.61	59.239	0.901	170.574	13241	1.537	0.651	0.961	0.429008
694	CEP164_KAN630-3_4.tif:0010-0539	0.889	17.217	0	47	2.044	61.2	0.918	15.304	1188	1.267	0.789	0.926	0.0384912
695	CEP164_KAN630-3_4.tif:0011-0692	1.713	47.752	0	136	97.91	78.474	0.93	81.815	6351	1.154	0.866	0.947	0.205772
696	CEP164_KAN630-3_4.tif:0012-0881	1.52	25.331	0	82	92.16	99.98	0.964	38.505	2989	1.184	0.845	0.937	0.0968436
697	CEP164_KAN630-3_4.tif:0013-0906	0.915	9	0	45	59.563	102.806	0.945	8.232	639	1.313	0.761	0.953	0.0207036
698	CEP164_KAN630-3_4.tif:0014-0921	1.262	17.388	0	72	124.38	104.59	0.913	21.951	1704	1.217	0.822	0.942	0.0552096
699	CEP164_KAN630-3_4.tif:0015-0998	0.94	10.644	0	70	90.558	113.278	0.936	10.01	777	1.282	0.78	0.961	0.0251748
										7001.86				0.22686
700	CEP164_KAN630-4_1.tif:0001-0056	1.675	44.069	0	224	20.291	6.414	0.92	73.802	5729	1.213	0.824	0.967	0.18562
701	CEP164_KAN630-4_1.tif:0002-0154	1.211	76.957	0	223	104.044	17.551	0.917	93.19	7234	1.231	0.812	0.974	0.234382
702	CEP164_KAN630-4_1.tif:0003-0170	1.417	47.091	0	164	57.093	19.297	0.98	66.73	5180	1.231	0.812	0.965	0.167832
703	CEP164_KAN630-4_1.tif:0004-0304	1.469	26.623	0	99	31.533	34.525	0.916	39.098	3035	1.158	0.863	0.946	0.098334
704	CEP164_KAN630-4_1.tif:0005-0325	1.494	122.552	0	742	9.507	36.928	0.932	183.134	14216	1.089	0.919	0.939	0.460598
705	CEP164_KAN630-4_1.tif:0006-0374	1.829	86.106	0	264	71.917	42.463	0.916	157.511	12227	1.316	0.76	0.966	0.396155
706	CEP164_KAN630-4_1.tif:0007-0446	0.928	38.458	0	92	134.425	50.673	0.996	35.671	2769	1.152	0.868	0.954	0.0897156
707	CEP164_KAN630-4_1.tif:0008-0492	1.61	117.448	0	802	9.212	55.823	0.91	189.124	14681	1.228	0.815	0.947	0.475664
708	CEP164_KAN630-4_1.tif:0009-0599	1.391	54.639	0	163	118.563	68.057	0.962	76.018	5901	1.138	0.879	0.956	0.191192
709	CEP164_KAN630-4_1.tif:0010-0648	0.928	44.875	0	160	26.499	73.621	0.996	41.623	3231	1.209	0.827	0.954	0.104684
710	CEP164_KAN630-4_1.tif:0011-0767	1.391	63.62	0	200	90.355	87.031	0.933	88.514	6871	1.198	0.835	0.952	0.22262
711	CEP164_KAN630-4_1.tif:0012-0786	1.404	35.954	0	217	45.221	89.182	0.93	50.486	3919	1.125	0.889	0.928	0.126976
712	CEP164_KAN630-4_1.tif:0013-0947	1.366	53.123	0	138	120.964	107.594	0.916	72.54	5631	1.07	0.934	0.946	0.182444
713	CEP164_KAN630-4_1.tif:0014-1142	1.353	20.867	0	67	137.404	129.677	0.997	28.225	2191	1.109	0.902	0.95	0.0709884
714	CEP164_KAN630-4_1.tif:0015-1193	0.812	53.683	0	123	21.218	135.412	0.937	43.568	3382	1.039	0.963	0.992	0.109577
715	CEP164_KAN630-4_1.tif:0016-1199	0.902	31.557	0	116	103.909	136.087	0.878	28.457	2209	1.429	0.7	1	0.0715716
716	CEP164_KAN630-4_2.tif:0001-0224	1.262	32.367	0	100	119.299	25.424	0.925	40.863	3172	1.001	0.999	0.99	0.102773
717	CEP164_KAN630-4_2.tif:0002-0232	1.391	99.815	0	419	88.645	26.304	0.933	138.871	10780	1.216	0.822	0.956	0.349272
718	CEP164_KAN630-4_2.tif:0003-0285	1.211	35.33	0	161	33.39	32.308	0.934	42.782	3321	1.216	0.823	0.945	0.1076
719	CEP164_KAN630-4_2.tif:0004-0350	1.301	42.931	0	129	14.952	39.802	0.929	55.857	4336	1.212	0.825	0.931	0.140486
720	CEP164_KAN630-4_2.tif:0005-0408	1.262	42.908	0	117	59.963	46.277	0.943	54.17	4205	1.35	0.741	0.961	0.136242
721	CEP164_KAN630-4_2.tif:0006-0413	1.597	58.661	0	189	85.397	46.918	0.955	93.706	7274	1.177	0.85	0.95	0.235678
722	CEP164_KAN630-4_2.tif:0007-0495	1.688	113.466	0	795	32.338	56.208	0.877	191.482	14864	1.236	0.809	0.97	0.481594
723	CEP164_KAN630-4_2.tif:0008-0618	0.837	30.385	0	103	1.887	70.137	0.951	25.442	1975	1.435	0.697	0.97	0.06399
724	CEP164_KAN630-4_2.tif:0009-0619	1.507	60.222	0	174	139.35	70.347	0.94	90.768	7046	1.164	0.859	0.951	0.22829
725	CEP164_KAN630-4_2.tif:0010-0712	1.366	40.226	0	165	12.688	80.832	0.975	54.93	4264	1.188	0.841	0.955	0.138154
726	CEP164_KAN630-4_2.tif:0011-0764	1.7	55.977	0	270	76.76	86.68	0.898	95.187	7389	1.272	0.786	0.943	0.239404
727	CEP164_KAN630-4_2.tif:0012-0867	1.327	46.097	0	124	57.342	98.448	0.947	61.165	4748	1.106	0.904	0.928	0.153835
728	CEP164_KAN630-4_2.tif:0013-0956	1.211	37.021	0	122	122.022	108.496	0.979	44.83	3480	1.046	0.956	0.974	0.112752
729	CEP164_KAN630-4_2.tif:0014-0980	1.61	40.832	0	193	111.094	111.274	0.899	65.751	5104	1.313	0.762	0.919	0.16537
730	CEP164_KAN630-4_2.tif:0015-1040	1.456	34.912	0	112	82.362	118.048	0.964	50.82	3945	1.103	0.907	0.946	0.127818
731	CEP164_KAN630-4_2.tif:0016-1077	1.25	31.67	0	186	52.2	122.317	0.964	39.574	3072	1.113	0.898	0.946	0.0995328
732	CEP164_KAN630-4_2.tif:0017-1144	1.185	44.674	0	153	24.341	129.883	0.959	52.946	4110	1.209	0.827	0.968	0.133164
733	CEP164_KAN630-4_2.tif:0018-1209	1.507	73.658	0	433	3.62	137.263	0.886	111.019	8618	1.367	0.732	0.955	0.279223
734	CEP164_KAN630-4_3.tif:0001-0064	1.417	43.609	0	215	83.284	7.326	0.95	61.796	4797	1.021	0.979	0.961	0.155423
735	CEP164_KAN630-4_3.tif:0002-0119	1.456	46.664	0	225	40.47	13.478	0.935	67.928	5273	1.137	0.879	0.942	0.170845
736	CEP164_KAN630-4_3.tif:0003-0250	1.533	33.546	0	184	127.799	28.341	0.944	51.426	3992	1.275	0.784	0.941	0.129341
737	CEP164_KAN630-4_3.tif:0004-0339	1.533	33.454	0	161	117.601	38.486	0.973	51.284	3981	1.012	0.988	0.941	0.128984
738	CEP164_KAN630-4_3.tif:0005-0341	1.378	60.308	0	340	58.789	38.665	0.896	83.129	6453	1.257	0.795	0.955	0.209077
739	CEP164_KAN630-4_3.tif:0006-0452	1.958	66.632	0	702	122.295	51.313	0.857	130.471	10128	1.457	0.686	0.913	0.328147
740	CEP164_KAN630-4_3.tif:0007-0550	1.662	88.093	0	393	24.682	62.404	0.902	146.394	11364	1.344	0.744	0.931	0.368194
741	CEP164_KAN630-4_3.tif:0008-0564	1.597	32.516	0	138	137.784	64.011	0.917	51.941	4032	1.366	0.732	0.943	0.130637
742	CEP164_KAN630-4_3.tif:0009-0661	0.94	30.767	0	98	59.016	75.027	0.936	28.934	2246	1.315	0.761	0.961	0.0727704
743	CEP164_KAN630-4_3.tif:0010-0715	1.649	44.492	0	219	35.34	81.116	0.921	73.364	5695	1.184	0.844	0.924	0.184518
744	CEP164_KAN630-4_3.tif:0011-0720	1.456	42.646	0	135	107.325	81.698	0.935	62.08	4819	1.214	0.824	0.946	0.156136
745	CEP164_KAN630-4_3.tif:0012-0819	1.327	32.466	0	144	13.693	92.984	0.947	43.078	3344	1.048	0.954	0.945	0.108346
746	CEP164_KAN630-4_3.tif:0013-0834	1.572	26.902	0	111	138.47	94.641	0.968	42.28	3282	1.03	0.971	0.938	0.106337
747	CEP164_KAN630-4_3.tif:0014-0863	1.108	33.767	0	121	124.231	98.005	0.927	37.41	2904	1.342	0.745	0.945	0.0940896
748	CEP164_KAN630-4_3.tif:0015-0881	1.546	40.725	0	211	92.388	100.09	0.936	62.956	4887	1.098	0.911	0.96	0.158339
749	CEP164_KAN630-4_3.tif:0016-0927	1.314	30.275	0	119	115.325	105.27	0.95	39.78	3088	1.118	0.895	0.967	0.100051
750	CEP164_KAN630-4_3.tif:0017-1004	1.301	25.96	0	85	55.294	113.988	0.9	33.777	2622	1.481	0.675	0.935	0.0849528
751	CEP164_KAN630-4_3.tif:0018-1062	1.069	27.048	0	102	47.95	120.534	0.974	28.921	2245	1.118	0.895	0.96	0.072738
752	CEP164_KAN630-4_3.tif:0019-1076	1.134	24.295	0	112	116.661	122.125	0.982	27.542	2138	1.021	0.979	0.946	0.0692712
753	CEP164_KAN630-4_3.tif:0020-1116	1.121	22.908	0	76	109.837	126.718	0.938	25.674	1993	1.243	0.805	0.946	0.0645732
754	CEP164_KAN630-4_3.tif:0021-1170	1.378	39.131	0	133	80.136	132.811	0.924	53.938	4187	1.27	0.788	0.96	0.135659
755	CEP164_KAN630-4_4.tif:0001-0012	1.043	45.691	0	149	57.713	1.388	0.985	47.677	3701	1.112	0.899	0.953	0.119912
756	CEP164_KAN630-4_4.tif:0002-0072	1.585	74.846	0	247	117.115	8.208	0.921	118.594	9206	1.209	0.827	0.95	0.298274
757	CEP164_KAN630-4_4.tif:0003-0099	1.662	47.326	0	198	141.674	11.302	0.954	78.646	6105	1.181	0.847	0.935	0.197802
758	CEP164_KAN630-4_4.tif:0004-0112	2.035	93.146	0	502	24.3	12.763	0.878	189.588	14717	1.518	0.659	0.958	0.476831
759	CEP164_KAN630-4_4.tif:0005-0128	1.443	47.518	0	136	15.947	14.609	0.938	68.559	5322	1.026	0.975	0.966	0.172433
760	CEP164_KAN630-4_4.tif:0006-0243	1.597	139.734	0	429	143.962	27.657	0.854	223.211	17327	1.364	0.733	0.939	0.561395
761	CEP164_KAN630-4_4.tif:0007-0267	1.404	38.028	0	143	70.218	30.37	0.971	53.397	4145	1.034	0.967	0.956	0.134298
762	CEP164_KAN630-4_4.tif:0008-0369	1.275	47.879	0	128	9.302	41.894	0.894	61.062	4740	1.148	0.871	0.957	0.153576
763	CEP164_KAN630-4_4.tif:0009-0393	0.85	24.652	0	111	22.406	44.606	1	20.959	1627	1.14	0.877	0.957	0.0527148
764	CEP164_KAN630-4_4.tif:0010-0411	1.726	64.746	0	420	107.103	46.626	0.937	111.766	8676	1.117	0.895	0.937	0.281102
765	CEP164_KAN630-4_4.tif:0011-0505	1.378	171.346	0	935	127.16	57.389	0.953	236.183	18334	1.196	0.836	0.955	0.594022
766	CEP164_KAN630-4_4.tif:0012-0523	1.597	69.944	0	236	70.921	59.358	0.984	111.728	8673	1.191	0.839	0.95	0.281005
767	CEP164_KAN630-4_4.tif:0013-0833	1.597	69.468	0	231	90.276	94.589	0.984	110.968	8614	1.258	0.795	0.954	0.279094
768	CEP164_KAN630-4_4.tif:0014-0940	1.043	26.951	0	102	87.195	106.692	0.917	28.122	2183	1.088	0.919	0.953	0.0707292
769	CEP164_KAN630-4_4.tif:0015-1074	0.889	10.13	0	53	42.68	121.962	0.933	9.005	699	1.156	0.865	0.979	0.0226476
770	CEP164_KAN630-4_4.tif:0016-1135	0.966	26	0	120	63.069	128.817	0.912	25.12	1950	1.462	0.684	0.932	0.06318
771	CEP164_KAN630-4_5.tif:0001-0041	1.224	31.232	0	87	7.618	4.664	0.932	38.222	2967	1.226	0.816	0.913	0.0961308
772	CEP164_KAN630-4_5.tif:0002-0104	1.752	51.978	0	201	97.553	11.791	0.951	91.065	7069	1.183	0.845	0.958	0.229036
773	CEP164_KAN630-4_5.tif:0003-0243	1.353	63.095	0	219	137.659	27.573	0.935	85.345	6625	1.215	0.823	0.946	0.21465
774	CEP164_KAN630-4_5.tif:0004-0292	1.121	43.207	0	292	66.312	33.21	0.907	48.424	3759	1.282	0.78	0.946	0.121792
775	CEP164_KAN630-4_5.tif:0005-0316	1.378	30.159	0	138	14.571	35.93	0.953	41.571	3227	1.003	0.997	0.947	0.104555
776	CEP164_KAN630-4_5.tif:0006-0427	1.559	80.132	0	469	54.601	48.5	0.906	124.906	9696	1.062	0.942	0.934	0.31415
777	CEP164_KAN630-4_5.tif:0007-0430	0.812	118.254	0	276	61.511	48.811	0.937	95.973	7450	1.039	0.963	0.992	0.24138
778	CEP164_KAN630-4_5.tif:0008-0435	1.327	64.825	0	185	103.953	49.425	0.991	86.015	6677	1.096	0.913	0.972	0.216335
779	CEP164_KAN630-4_5.tif:0009-0440	1.507	37.889	0	145	79.885	49.953	0.912	57.107	4433	1.084	0.923	0.955	0.143629
780	CEP164_KAN630-4_5.tif:0010-0572	1.327	83.155	0	351	4.449	64.865	0.918	110.336	8565	1.189	0.841	0.949	0.277506
781	CEP164_KAN630-4_5.tif:0011-0719	1.043	37.037	0	106	88.863	81.6	0.936	38.647	3000	1.308	0.764	0.92	0.0972
782	CEP164_KAN630-4_5.tif:0012-0757	1.353	57.848	0	260	119.956	85.923	0.907	78.247	6074	1.288	0.776	0.942	0.196798
783	CEP164_KAN630-4_5.tif:0013-0887	1.056	21.854	0	74	11.985	100.679	0.897	23.085	1792	1.222	0.818	0.953	0.0580608
784	CEP164_KAN630-4_5.tif:0014-0999	0.902	32.586	0	105	40.25	113.456	0.932	29.384	2281	1.076	0.929	0.933	0.0739044
785	CEP164_KAN630-4_5.tif:0015-1077	1.134	52.034	0	229	99.822	122.304	0.982	58.988	4579	1.276	0.784	0.951	0.14836
										5672				0.183773
786	CEP164_KAN630-5_1.tif:0001-0018	2.589	155.03	0	1392	71.137	2.075	0.865	401.424	31161	1.275	0.784	0.901	1.00962
787	CEP164_KAN630-5_1.tif:0002-0218	2.023	228.529	0	1509	10.429	24.707	0.917	462.202	35879	1.252	0.799	0.96	1.16248
788	CEP164_KAN630-5_1.tif:0003-0247	1.095	111.153	0	279	139.098	28.039	0.929	121.712	9448	1.137	0.879	0.971	0.306115
789	CEP164_KAN630-5_1.tif:0004-0275	2.164	189.518	0	1248	40.301	31.203	0.86	410.158	31839	1.35	0.741	0.952	1.03158
790	CEP164_KAN630-5_1.tif:0005-0285	1.726	245.627	0	1306	86.268	32.323	0.948	424.006	32914	1.028	0.973	0.971	1.06641
791	CEP164_KAN630-5_1.tif:0006-0359	1.894	190.959	0	1012	119.219	40.811	0.963	361.618	28071	1.229	0.814	0.958	0.9095
792	CEP164_KAN630-5_1.tif:0007-0533	1.005	116.872	0	356	23.381	60.496	0.929	117.435	9116	1.259	0.794	0.987	0.295358
793	CEP164_KAN630-5_1.tif:0008-0534	1.031	202.3	0	1176	90.862	60.671	0.919	208.486	16184	1.031	0.97	0.994	0.524362
794	CEP164_KAN630-5_1.tif:0009-0621	1.945	177.874	0	1154	41.203	70.492	0.86	346.004	26859	1.282	0.78	0.921	0.870232
795	CEP164_KAN630-5_1.tif:0010-0644	1.481	199.626	0	1306	59.143	73.118	0.952	295.738	22957	1.225	0.816	0.958	0.743807
796	CEP164_KAN630-5_1.tif:0011-0743	1.688	207.221	0	911	93.764	84.329	0.953	349.702	27146	1.188	0.842	0.967	0.87953
797	CEP164_KAN630-5_1.tif:0012-0916	2.19	211.235	0	1208	112.034	103.921	0.913	462.602	35910	1.376	0.727	0.96	1.16348
798	CEP164_KAN630-5_1.tif:0013-0930	0.953	101.77	0	214	17.162	105.518	0.881	97.016	7531	1.27	0.787	0.961	0.244004
799	CEP164_KAN630-5_1.tif:0014-0982	1.881	224.822	0	1265	74.632	111.507	0.931	422.847	32824	1.242	0.805	0.957	1.0635
800	CEP164_KAN630-5_1.tif:0015-1000	1.816	134.206	0	849	46.894	113.599	0.854	243.771	18923	1.08	0.926	0.922	0.613105
801	CEP164_KAN630-5_1.tif:0016-1064	1.456	172.31	0	645	93.71	120.804	0.919	250.83	19471	1.163	0.86	0.978	0.63086
802	CEP164_KAN630-5_1.tif:0017-1145	2.254	157.92	0	1158	101.033	130.09	0.866	356.014	27636	1.213	0.824	0.933	0.895406
803	CEP164_KAN630-5_1.tif:0018-1210	1.134	150.807	0	899	13.459	137.323	0.899	170.96	13271	1.117	0.895	0.989	0.42998
804	CEP164_KAN630-5_2.tif:0001-0015	1.855	169.903	0	789	64.684	1.756	0.895	315.177	24466	1.373	0.728	0.947	0.792698
805	CEP164_KAN630-5_2.tif:0002-0014	0.812	111.556	0	373	106.747	1.646	0.9	90.536	7028	1.286	0.778	1	0.227707
806	CEP164_KAN630-5_2.tif:0003-0018	1.932	186.533	0	836	83.426	2.09	0.908	360.445	27980	1.198	0.834	0.962	0.906552
807	CEP164_KAN630-5_2.tif:0004-0116	1.829	182.556	0	952	73.384	13.181	0.941	333.947	25923	1.077	0.928	0.963	0.839905
808	CEP164_KAN630-5_2.tif:0005-0127	1.791	111.18	0	367	6.128	14.45	0.911	199.082	15454	1.296	0.772	0.933	0.50071
809	CEP164_KAN630-5_2.tif:0006-0141	1.688	210.55	0	1150	41.119	16.023	0.927	355.318	27582	1.077	0.929	0.963	0.893657
810	CEP164_KAN630-5_2.tif:0007-0168	2.229	231.919	0	1068	138.077	19.146	0.929	516.862	40122	1.26	0.794	0.958	1.29995
811	CEP164_KAN630-5_2.tif:0008-0223	2.28	178.638	0	920	101.317	25.32	0.897	407.324	31619	1.142	0.875	0.934	1.02446
812	CEP164_KAN630-5_2.tif:0009-0283	2.538	142.259	0	1198	53.043	32.148	0.763	361.025	28025	1.677	0.596	0.9	0.90801
813	CEP164_KAN630-5_2.tif:0010-0463	2.254	201.434	0	1260	128.039	52.611	0.866	454.112	35251	1.463	0.684	0.954	1.14213
814	CEP164_KAN630-5_2.tif:0011-0479	2.216	196.599	0	1345	105.201	54.357	0.914	435.613	33815	1.335	0.749	0.942	1.09561
815	CEP164_KAN630-5_2.tif:0012-0616	2.512	262.503	0	2065	107.806	70.026	0.913	659.417	51188	1.34	0.746	0.968	1.65849
816	CEP164_KAN630-5_2.tif:0013-0617	1.778	184.051	0	1088	35.739	70.055	0.965	327.196	25399	1.165	0.858	0.965	0.822928
817	CEP164_KAN630-5_2.tif:0014-0676	2.203	175.684	0	1252	21.84	76.741	0.819	387.009	30042	1.641	0.609	0.914	0.973361
818	CEP164_KAN630-5_2.tif:0015-0809	1.881	214.349	0	1471	61.086	91.816	0.84	403.15	31295	1.195	0.837	0.936	1.01396
819	CEP164_KAN630-5_2.tif:0016-0867	2.138	157.458	0	515	110.061	98.478	0.879	336.716	26138	1.303	0.767	0.971	0.846871
820	CEP164_KAN630-5_2.tif:0017-0973	1.829	259.641	0	1626	89.572	110.507	0.916	474.956	36869	1.101	0.908	0.963	1.19456
821	CEP164_KAN630-5_2.tif:0018-0985	1.984	124.149	0	763	22.4	111.938	0.77	246.296	19119	1.715	0.583	0.919	0.619456
822	CEP164_KAN630-5_2.tif:0019-0998	1.597	128.427	0	331	124.056	113.275	0.877	205.15	15925	1.544	0.648	0.961	0.51597
823	CEP164_KAN630-5_2.tif:0020-1211	1.894	134.007	0	601	106.328	137.525	0.868	253.767	19699	1.413	0.708	0.948	0.638248
824	CEP164_KAN630-5_2.tif:0021-1273	0.915	169.127	0	652	20.739	144.568	0.877	154.69	12008	1.589	0.629	0.966	0.389059
825	CEP164_KAN630-5_3.tif:0001-0021	2.19	205.853	0	1060	103.481	2.423	0.913	450.814	34995	1.175	0.851	0.944	1.13384
826	CEP164_KAN630-5_3.tif:0002-0038	0.837	38.969	0	119	130.199	4.365	0.99	32.631	2533	1.115	0.897	0.956	0.0820692
827	CEP164_KAN630-5_3.tif:0003-0076	2.1	222.129	0	1143	29.017	8.604	0.952	466.428	36207	1.113	0.899	0.964	1.17311
828	CEP164_KAN630-5_3.tif:0004-0084	1.816	243.766	0	1458	81.944	9.596	0.934	442.776	34371	1.288	0.777	0.969	1.11362
829	CEP164_KAN630-5_3.tif:0005-0210	0.812	125.222	0	753	77.855	23.841	0.937	101.628	7889	1.039	0.963	0.992	0.255604
830	CEP164_KAN630-5_3.tif:0006-0258	1.932	178.547	0	1147	85.042	29.278	0.932	345.012	26782	1.176	0.85	0.958	0.867737
831	CEP164_KAN630-5_3.tif:0007-0373	2.164	252.845	0	2398	113.032	42.354	0.893	547.212	42478	1.293	0.774	0.918	1.37629
832	CEP164_KAN630-5_3.tif:0008-0467	2.126	174.267	0	1168	19.879	53.017	0.898	370.416	28754	1.379	0.725	0.93	0.93163
833	CEP164_KAN630-5_3.tif:0009-0469	1.585	260.732	0	1239	51.372	53.246	0.959	413.134	32070	1.108	0.903	0.976	1.03907
834	CEP164_KAN630-5_3.tif:0010-0684	1.675	207.6	0	1348	7.776	77.586	0.885	347.666	26988	1.338	0.747	0.922	0.874411
835	CEP164_KAN630-5_3.tif:0011-0728	1.765	198.883	0	1137	46.72	82.622	0.932	351.003	27247	1.245	0.803	0.951	0.882803
836	CEP164_KAN630-5_3.tif:0012-0748	2.345	211.549	0	1311	77.412	84.937	0.922	495.992	38502	1.081	0.925	0.948	1.24746
837	CEP164_KAN630-5_3.tif:0013-0898	1.366	266.689	0	1292	38.079	101.932	0.927	364.168	28269	1.105	0.905	0.981	0.915916
838	CEP164_KAN630-5_3.tif:0014-0958	1.894	236.864	0	1825	100.253	108.764	0.938	448.547	34819	1.074	0.931	0.948	1.12814
839	CEP164_KAN630-5_3.tif:0015-0980	1.765	171.117	0	950	71	111.201	0.958	301.999	23443	1.268	0.789	0.961	0.759553
840	CEP164_KAN630-5_3.tif:0016-0997	1.494	189.897	0	1018	42.623	113.221	0.943	283.77	22028	1.019	0.981	0.979	0.713707
841	CEP164_KAN630-5_3.tif:0017-1023	1.314	118.078	0	350	108.706	116.09	0.892	155.154	12044	1.178	0.849	0.967	0.390226
842	CEP164_KAN630-5_3.tif:0018-1207	1.237	168.198	0	747	62.259	137.045	0.936	208.01	16147	1.222	0.818	0.985	0.523163
843	CEP164_KAN630-5_3.tif:0019-1269	1.378	176.776	0	622	19.222	144.035	0.908	243.668	18915	1.095	0.913	0.986	0.612846
844	CEP164_KAN630-5_4.tif:0001-0022	1.894	162.531	0	1039	61.688	2.569	0.913	307.783	23892	1.487	0.673	0.961	0.774101
845	CEP164_KAN630-5_4.tif:0002-0183	1.816	249.652	0	1284	95.93	20.866	0.909	453.468	35201	1.117	0.896	0.959	1.14051
846	CEP164_KAN630-5_4.tif:0003-0218	2.023	208.102	0	1432	66.533	24.777	0.894	420.889	32672	1.54	0.649	0.954	1.05857
847	CEP164_KAN630-5_4.tif:0004-0272	1.752	165.199	0	869	45.527	30.945	0.951	289.426	22467	1.188	0.842	0.951	0.727931
848	CEP164_KAN630-5_4.tif:0005-0321	2.229	172.792	0	1547	129.853	36.489	0.785	385.089	29893	1.542	0.649	0.872	0.968533
849	CEP164_KAN630-5_4.tif:0006-0348	1.804	200.014	0	1145	116.225	39.53	0.903	360.729	28002	1.266	0.79	0.962	0.907265
850	CEP164_KAN630-5_4.tif:0007-0496	1.919	212.617	0	1280	61.742	56.29	0.926	408.11	31680	1.261	0.793	0.955	1.02643
851	CEP164_KAN630-5_4.tif:0008-0508	1.121	268.69	0	1899	133.074	57.663	0.919	301.136	23376	1.146	0.872	0.983	0.757382
852	CEP164_KAN630-5_4.tif:0009-0610	1.713	234.887	0	1580	115.819	69.321	0.93	402.442	31240	1.267	0.789	0.957	1.01218
853	CEP164_KAN630-5_4.tif:0010-0698	1.713	222.06	0	1166	20.658	79.241	0.915	380.464	29534	1.012	0.988	0.964	0.956902
854	CEP164_KAN630-5_4.tif:0011-0801	2.203	206.152	0	1768	72.312	90.909	0.838	454.125	35252	1.462	0.684	0.905	1.14216
855	CEP164_KAN630-5_4.tif:0012-0827	1.507	220.598	0	1180	45.411	93.932	0.94	332.491	25810	1.165	0.858	0.955	0.836244
856	CEP164_KAN630-5_4.tif:0013-0866	1.713	155.925	0	878	26.204	98.313	0.93	267.152	20738	1.177	0.849	0.94	0.671911
857	CEP164_KAN630-5_4.tif:0014-0903	1.301	134.149	0	484	121.356	102.558	0.941	174.542	13549	1.139	0.878	0.962	0.438988
858	CEP164_KAN630-5_4.tif:0015-0936	1.327	206.33	0	957	50.058	106.287	0.96	273.774	21252	1.153	0.867	0.976	0.688565
859	CEP164_KAN630-5_4.tif:0016-1048	1.469	211.912	0	1081	112.261	118.956	0.955	311.209	24158	1.201	0.833	0.979	0.782719
860	CEP164_KAN630-5_4.tif:0017-1092	2.035	160.089	0	1031	100.583	123.933	0.869	325.844	25294	1.379	0.725	0.921	0.819526
861	CEP164_KAN630-5_4.tif:0018-1103	1.456	205.85	0	964	4.21	125.176	0.892	299.654	23261	1.254	0.798	0.974	0.753656
862	CEP164_KAN630-5_4.tif:0019-1194	1.456	148.549	0	546	136.711	135.568	0.947	216.241	16786	1.039	0.962	0.97	0.543866
863	CEP164_KAN630-5_4.tif:0020-1242	1.43	190.225	0	868	66.925	141.049	0.959	272.009	21115	1.072	0.933	0.969	0.684126
										25663.3				0.831492
864	CEP164_KAN630-6_1.tif:0001-0032	2.461	206.785	0	964	37.344	3.692	0.886	508.797	39496	1.195	0.837	0.925	1.27967
865	CEP164_KAN630-6_1.tif:0002-0238	2.216	173.843	0	1256	18.991	27.036	0.892	385.192	29901	1.36	0.735	0.93	0.968792
866	CEP164_KAN630-6_1.tif:0003-0332	2.242	200.144	0	1497	50.047	37.64	0.947	448.624	34825	1.089	0.919	0.933	1.12833
867	CEP164_KAN630-6_1.tif:0004-0462	1.662	149.589	0	614	107.827	52.4	0.888	248.589	19297	1.104	0.906	0.952	0.625223
868	CEP164_KAN630-6_1.tif:0005-0523	1.25	176.052	0	817	4.866	59.375	0.916	219.99	17077	1.071	0.934	0.99	0.553295
869	CEP164_KAN630-6_1.tif:0006-0528	1.649	178.977	0	1135	75.212	60.002	0.906	295.12	22909	1.293	0.773	0.955	0.742252
870	CEP164_KAN630-6_1.tif:0007-0548	1.572	148.918	0	452	48.665	62.27	0.951	234.045	18168	1.114	0.898	0.972	0.588643
871	CEP164_KAN630-6_1.tif:0008-0690	1.443	168.857	0	880	62.668	78.315	0.967	243.629	18912	1.196	0.836	0.974	0.612749
872	CEP164_KAN630-6_1.tif:0009-0693	1.894	109.98	0	365	105.99	78.711	0.881	208.267	16167	1.514	0.661	0.942	0.523811
873	CEP164_KAN630-6_1.tif:0010-0715	1.791	240.978	0	1479	19.669	81.206	0.946	431.504	33496	1.094	0.914	0.959	1.08527
874	CEP164_KAN630-6_1.tif:0011-0932	1.546	159.408	0	724	49.671	105.799	0.936	246.425	19129	1.117	0.895	0.96	0.61978
875	CEP164_KAN630-6_1.tif:0012-0937	2.113	174.122	0	1094	115.002	106.408	0.972	367.866	28556	1.19	0.841	0.945	0.925214
876	CEP164_KAN630-6_1.tif:0013-0963	1.791	168.237	0	915	31.599	109.267	0.972	301.251	23385	1.098	0.911	0.959	0.757674
877	CEP164_KAN630-6_1.tif:0014-0992	1.572	198.287	0	1076	88.822	112.601	0.98	311.635	24191	1.096	0.912	0.972	0.783788
878	CEP164_KAN630-6_1.tif:0015-1057	0.992	162.883	0	947	139.321	120.037	0.951	161.569	12542	1.06	0.944	0.975	0.406361
879	CEP164_KAN630-6_1.tif:0016-1209	1.327	151.408	0	634	137.395	137.228	0.901	200.899	15595	1.361	0.735	0.981	0.505278
880	CEP164_KAN630-6_1.tif:0017-1226	1.443	133.857	0	510	105.493	139.179	0.938	193.131	14992	1.053	0.949	0.97	0.485741
881	CEP164_KAN630-6_1.tif:0018-1234	1.34	158.308	0	737	1.93	140.107	0.939	212.093	16464	1.108	0.902	0.972	0.533434
882	CEP164_KAN630-6_1.tif:0019-1241	1.211	168.574	0	691	20.779	140.854	0.887	204.132	15846	1.497	0.668	0.989	0.51341
883	CEP164_KAN630-6_1.tif:0020-1259	1.314	131.686	0	453	32.724	142.91	0.95	173.034	13432	1.103	0.906	0.967	0.435197
884	CEP164_KAN630-6_2.tif:0001-0072	1.34	211.279	0	1048	105.677	8.219	0.969	283.062	21973	1.108	0.903	0.977	0.711925
885	CEP164_KAN630-6_2.tif:0002-0137	1.636	196.543	0	1134	138.287	15.589	0.899	321.554	24961	1.22	0.819	0.962	0.808736
886	CEP164_KAN630-6_2.tif:0003-0164	2.035	183.956	0	1159	8.436	18.61	0.923	374.423	29065	1.208	0.828	0.949	0.941706
887	CEP164_KAN630-6_2.tif:0004-0281	1.752	308.757	0	2838	31.324	31.884	0.936	540.939	41991	1.104	0.906	0.978	1.36051
888	CEP164_KAN630-6_2.tif:0005-0282	2.345	135.626	0	1206	68.007	32.074	0.844	317.986	24684	1.553	0.644	0.905	0.799762
889	CEP164_KAN630-6_2.tif:0006-0315	2.345	175.39	0	1403	81.822	35.606	0.685	411.214	31921	2.256	0.443	0.883	1.03424
890	CEP164_KAN630-6_2.tif:0007-0333	2.087	148.537	0	727	59.24	37.852	0.923	309.986	24063	1.208	0.828	0.953	0.779641
891	CEP164_KAN630-6_2.tif:0008-0354	2.19	201.447	0	1490	122.752	40.146	0.926	441.166	34246	1.205	0.83	0.926	1.10957
892	CEP164_KAN630-6_2.tif:0009-0364	1.842	213.545	0	1404	136.681	41.295	0.937	393.385	30537	1.219	0.82	0.941	0.989399
893	CEP164_KAN630-6_2.tif:0010-0369	1.623	182.032	0	1209	29.713	41.88	0.959	295.467	22936	1.409	0.71	0.951	0.743126
894	CEP164_KAN630-6_2.tif:0011-0417	0.812	245.571	0	996	0.667	47.379	0.852	199.301	15471	1.836	0.545	0.977	0.50126
895	CEP164_KAN630-6_2.tif:0012-0468	1.25	334.495	0	2820	86.255	53.122	0.916	417.978	32446	1.076	0.93	0.985	1.05125
896	CEP164_KAN630-6_2.tif:0013-0596	1.404	211.486	0	1223	136.488	67.731	0.971	296.962	23052	1.115	0.897	0.96	0.746885
897	CEP164_KAN630-6_2.tif:0014-0633	2.035	219.272	0	1546	90.212	71.789	0.869	446.306	34645	1.299	0.77	0.916	1.1225
898	CEP164_KAN630-6_2.tif:0015-0752	2.061	154.556	0	1202	41.408	85.336	0.859	318.565	24729	1.347	0.742	0.909	0.80122
899	CEP164_KAN630-6_2.tif:0016-0826	1.907	134.791	0	842	4.629	93.838	0.852	256.988	19949	1.486	0.673	0.952	0.646348
900	CEP164_KAN630-6_2.tif:0017-0849	1.327	168.874	0	997	22.374	96.425	0.901	224.074	17394	1.141	0.876	0.967	0.563566
901	CEP164_KAN630-6_2.tif:0018-0851	1.958	161.658	0	1177	99.802	96.58	0.845	316.543	24572	1.34	0.746	0.924	0.796133
902	CEP164_KAN630-6_2.tif:0019-0901	1.855	176.25	0	1153	49.043	102.286	0.841	326.952	25380	1.444	0.692	0.909	0.822312
903	CEP164_KAN630-6_2.tif:0020-0931	2.126	135.194	0	1017	61.918	105.674	0.856	287.364	22307	1.386	0.721	0.904	0.722747
904	CEP164_KAN630-6_2.tif:0021-1061	1.971	171.268	0	1328	82.307	120.37	0.821	337.567	26204	1.279	0.782	0.895	0.84901
905	CEP164_KAN630-6_2.tif:0022-1165	1.456	165.699	0	805	143.296	132.294	0.976	241.207	18724	1.122	0.891	0.974	0.606658
906	CEP164_KAN630-6_2.tif:0023-1179	1.816	127.574	0	914	46.879	133.893	0.832	231.726	17988	1.457	0.686	0.931	0.582811
907	CEP164_KAN630-6_2.tif:0024-1220	1.237	186.521	0	948	108.331	138.533	0.936	230.67	17906	1.222	0.818	0.985	0.580154
908	CEP164_KAN630-6_2.tif:0025-1242	1.443	137.411	0	706	28.311	140.938	0.927	198.258	15390	1.35	0.741	0.953	0.498636
909	CEP164_KAN630-6_3.tif:0001-0028	2.834	184.964	0	1935	35.34	3.144	0.837	524.205	40692	1.573	0.636	0.915	1.31842
910	CEP164_KAN630-6_3.tif:0002-0054	1.816	238.035	0	1829	80.254	6.187	0.934	432.367	33563	1.101	0.908	0.959	1.08744
911	CEP164_KAN630-6_3.tif:0003-0085	3.002	205.966	0	2068	91.107	9.646	0.876	618.219	47990	1.417	0.706	0.947	1.55488
912	CEP164_KAN630-6_3.tif:0004-0104	3.388	153.27	0	2109	48.855	11.916	0.692	519.284	40310	2.075	0.482	0.874	1.30604
913	CEP164_KAN630-6_3.tif:0005-0232	2.576	234.35	0	2164	60.737	26.409	0.907	603.791	46870	1.24	0.806	0.932	1.51859
914	CEP164_KAN630-6_3.tif:0006-0247	1.366	34.075	0	151	77.66	28.021	0.944	46.531	3612	1.219	0.82	0.951	0.117029
915	CEP164_KAN630-6_3.tif:0007-0280	1.816	140.511	0	508	108.314	31.799	0.934	255.223	19812	1.215	0.823	0.962	0.641909
916	CEP164_KAN630-6_3.tif:0008-0290	2.061	203.012	0	1341	139.919	32.928	0.889	418.441	32482	1.317	0.759	0.952	1.05242
917	CEP164_KAN630-6_3.tif:0009-0420	2.216	215.843	0	1666	51.022	47.644	0.863	478.254	37125	1.45	0.69	0.92	1.20285
918	CEP164_KAN630-6_3.tif:0010-0419	1.881	137.932	0	675	139.878	47.602	0.811	259.423	20138	1.348	0.742	0.898	0.652471
919	CEP164_KAN630-6_3.tif:0011-0478	1.907	191.561	0	1440	5.881	54.36	0.74	365.225	28351	1.657	0.604	0.908	0.918572
920	CEP164_KAN630-6_3.tif:0012-0586	1.713	158.677	0	670	133.079	66.568	0.968	271.867	21104	1.193	0.838	0.971	0.68377
921	CEP164_KAN630-6_3.tif:0013-0603	1.919	228.886	0	1613	108.832	68.416	0.916	439.336	34104	1.173	0.852	0.937	1.10497
922	CEP164_KAN630-6_3.tif:0014-0653	2.345	194.126	0	1255	86.09	74.082	0.872	455.143	35331	1.454	0.688	0.941	1.14472
923	CEP164_KAN630-6_3.tif:0015-0660	2.229	202.468	0	1522	30.36	74.899	0.898	451.227	35027	1.446	0.692	0.943	1.13487
924	CEP164_KAN630-6_3.tif:0016-0732	2.564	170.593	0	1851	54.372	82.998	0.78	437.327	33948	1.464	0.683	0.865	1.09992
925	CEP164_KAN630-6_3.tif:0017-0730	2.074	131.087	0	589	132.727	82.881	0.873	271.88	21105	1.128	0.886	0.95	0.683802
926	CEP164_KAN630-6_3.tif:0018-0757	1.829	191.303	0	1414	74.28	85.939	0.916	349.946	27165	1.176	0.85	0.959	0.880146
927	CEP164_KAN630-6_3.tif:0019-0807	2.229	158.046	0	1234	4.857	91.575	0.792	352.227	27342	1.603	0.624	0.901	0.885881
928	CEP164_KAN630-6_3.tif:0020-0857	1.211	135.596	0	436	69.576	97.27	0.887	164.197	12746	1.502	0.666	0.989	0.41297
929	CEP164_KAN630-6_3.tif:0021-0946	2.061	197.088	0	1448	54.467	107.424	0.948	406.229	31534	1.294	0.773	0.944	1.0217
930	CEP164_KAN630-6_3.tif:0022-0976	2.28	209.644	0	1769	125.549	110.744	0.829	478.022	37107	1.408	0.71	0.915	1.20227
931	CEP164_KAN630-6_3.tif:0023-1086	1.739	175.948	0	1009	34.645	123.319	0.944	305.992	23753	1.194	0.838	0.951	0.769597
932	CEP164_KAN630-6_3.tif:0024-1142	1.868	205.917	0	1234	96.62	129.627	0.901	384.638	29858	1.247	0.802	0.945	0.967399
933	CEP164_KAN630-6_3.tif:0025-1181	2.242	122.443	0	764	84.301	134.111	0.834	274.456	21305	1.464	0.683	0.902	0.690282
934	CEP164_KAN630-6_3.tif:0026-1214	1.636	86.803	0	334	65.552	137.83	0.864	142.014	11024	1.478	0.677	0.924	0.357178
935	CEP164_KAN630-6_3.tif:0027-1259	1.378	119.037	0	437	111.9	142.983	0.924	164.081	12737	1.056	0.947	0.951	0.412679
936	CEP164_KAN630-6_4.tif:0001-0078	2.448	201.337	0	1868	125.96	8.884	0.862	492.798	38254	1.414	0.707	0.913	1.23943
937	CEP164_KAN630-6_4.tif:0002-0131	1.997	238.903	0	2120	104.968	14.881	0.963	477.03	37030	1.17	0.855	0.969	1.19977
938	CEP164_KAN630-6_4.tif:0003-0261	2.306	166.464	0	1503	41.825	29.628	0.812	383.852	29797	1.589	0.629	0.893	0.965423
939	CEP164_KAN630-6_4.tif:0004-0266	1.791	205.381	0	1195	83.545	30.173	0.935	367.763	28548	1.266	0.79	0.939	0.924955
940	CEP164_KAN630-6_4.tif:0005-0339	2.345	301.412	0	2353	130.897	38.482	0.935	706.682	54857	1.319	0.758	0.945	1.77737
941	CEP164_KAN630-6_4.tif:0006-0359	2.293	333.562	0	2731	97.049	40.776	0.881	764.871	59374	1.389	0.72	0.96	1.92372
942	CEP164_KAN630-6_4.tif:0007-0378	1.636	228.598	0	1244	12.67	42.982	0.924	373.998	29032	1.274	0.785	0.958	0.940637
943	CEP164_KAN630-6_4.tif:0008-0396	0.799	100.581	0	590	76.045	44.946	0.96	80.334	6236	1.081	0.925	0.984	0.202046
944	CEP164_KAN630-6_4.tif:0009-0449	2.499	257.84	0	1990	99.3	50.971	0.921	644.383	50021	1.398	0.715	0.937	1.62068
945	CEP164_KAN630-6_4.tif:0010-0463	2.383	198.524	0	1539	133.76	52.607	0.907	473.126	36727	1.259	0.794	0.925	1.18995
946	CEP164_KAN630-6_4.tif:0011-0543	1.597	205.879	0	1072	45.078	61.689	0.913	328.871	25529	1.11	0.901	0.973	0.82714
947	CEP164_KAN630-6_4.tif:0012-0567	2.048	241.679	0	1350	60.061	64.426	0.953	495.026	38427	1.157	0.864	0.955	1.24503
948	CEP164_KAN630-6_4.tif:0013-0617	2.821	223.95	0	2272	81.771	70.198	0.77	631.81	49045	1.792	0.558	0.944	1.58906
949	CEP164_KAN630-6_4.tif:0014-0712	2.461	154.455	0	1461	113.492	80.862	0.819	380.039	29501	1.736	0.576	0.962	0.955832
950	CEP164_KAN630-6_4.tif:0015-0787	1.765	274.226	0	1842	28.908	89.324	0.958	483.973	37569	1.073	0.932	0.951	1.21724
951	CEP164_KAN630-6_4.tif:0016-0852	1.688	128.023	0	323	58.81	96.715	0.927	216.048	16771	1.041	0.96	0.963	0.54338
952	CEP164_KAN630-6_4.tif:0017-0891	2.345	215.121	0	1690	103.567	101.135	0.901	504.366	39152	1.534	0.652	0.958	1.26852
953	CEP164_KAN630-6_4.tif:0018-0921	2.28	179.576	0	1503	132.746	104.622	0.826	409.462	31785	1.592	0.628	0.975	1.02983
954	CEP164_KAN630-6_4.tif:0019-1000	2.499	180.943	0	1552	92.146	113.573	0.861	452.206	35103	1.35	0.741	0.915	1.13734
955	CEP164_KAN630-6_4.tif:0020-1042	2.254	121.103	0	998	8.447	118.339	0.838	273.014	21193	1.397	0.716	0.904	0.686653
956	CEP164_KAN630-6_4.tif:0021-1163	2.512	125.723	0	1025	71.618	132.063	0.821	315.821	24516	1.668	0.599	0.915	0.794318
										27328.1				0.885431
957	CEP164_KAN630-7_1.tif:0001-0085	2.19	224.041	0	1580	99.124	9.698	0.891	490.646	38087	1.346	0.743	0.952	1.23402
958	CEP164_KAN630-7_1.tif:0002-0101	1.585	189.439	0	1152	4.474	11.547	0.948	300.169	23301	1.345	0.743	0.957	0.754952
959	CEP164_KAN630-7_1.tif:0003-0135	2.061	192.319	0	1254	72.46	15.349	0.8	396.4	30771	1.568	0.638	0.92	0.99698
960	CEP164_KAN630-7_1.tif:0004-0248	2.345	180.67	0	1590	135.074	28.106	0.735	423.594	32882	1.766	0.566	0.863	1.06538
961	CEP164_KAN630-7_1.tif:0005-0297	1.984	195.026	0	984	46.007	33.688	0.909	386.906	30034	1.177	0.85	0.966	0.973102
962	CEP164_KAN630-7_1.tif:0006-0390	1.688	232.015	0	1687	142.307	44.314	0.927	391.543	30394	1.176	0.85	0.97	0.984766
963	CEP164_KAN630-7_1.tif:0007-0499	1.752	179.074	0	1372	25.532	56.623	0.868	313.734	24354	1.313	0.761	0.907	0.78907
964	CEP164_KAN630-7_1.tif:0008-0512	1.52	249.415	0	1527	128.643	58.1	0.976	379.138	29431	1.128	0.887	0.955	0.953564
965	CEP164_KAN630-7_1.tif:0009-0678	1.636	179.165	0	1063	18.938	76.992	0.924	293.123	22754	1.237	0.809	0.955	0.73723
966	CEP164_KAN630-7_1.tif:0010-0692	2.345	200.632	0	1761	71.466	78.523	0.808	470.395	36515	1.503	0.665	0.89	1.18309
967	CEP164_KAN630-7_1.tif:0011-0747	2.319	194.978	0	1096	119.159	84.828	0.934	452.116	35096	1.07	0.934	0.95	1.13711
968	CEP164_KAN630-7_1.tif:0012-0870	2.1	173.405	0	1170	41.145	98.761	0.854	364.117	28265	1.377	0.726	0.931	0.915786
969	CEP164_KAN630-7_1.tif:0013-0945	2.486	195.912	0	1377	96.562	107.284	0.857	487.091	37811	1.468	0.681	0.939	1.22508
970	CEP164_KAN630-7_1.tif:0014-0998	2.731	136.703	0	1049	122.649	113.262	0.848	373.341	28981	1.36	0.735	0.91	0.938984
971	CEP164_KAN630-7_1.tif:0015-1001	1.572	249.402	0	1632	63.745	113.579	0.924	391.968	30427	1.1	0.909	0.972	0.985835
972	CEP164_KAN630-7_1.tif:0016-1155	1.507	122.282	0	479	41.146	131.134	0.968	184.306	14307	1.146	0.873	0.959	0.463547
973	CEP164_KAN630-7_1.tif:0017-1170	1.984	143.714	0	924	103.486	132.831	0.788	285.11	22132	1.358	0.737	0.885	0.717077
974	CEP164_KAN630-7_1.tif:0018-1215	2.409	154.043	0	1716	74.581	137.905	0.819	371.086	28806	1.53	0.653	0.935	0.933314
975	CEP164_KAN630-7_1.tif:0019-1239	1.7	206.826	0	1104	15.109	140.611	0.909	351.698	27301	1.206	0.829	0.971	0.884552
976	CEP164_KAN630-7_2.tif:0001-0043	1.907	273.318	0	1849	85.492	4.873	0.944	521.1	40451	1.241	0.806	0.955	1.31061
977	CEP164_KAN630-7_2.tif:0002-0071	1.726	113.672	0	301	44.878	8.161	0.864	196.222	15232	1.392	0.718	0.937	0.493517
978	CEP164_KAN630-7_2.tif:0003-0088	1.971	171.824	0	816	91.573	10.026	0.903	338.662	26289	1.162	0.861	0.965	0.851764
979	CEP164_KAN630-7_2.tif:0004-0103	2.1	221.509	0	1570	115.389	11.645	0.897	465.127	36106	1.457	0.686	0.956	1.16983
980	CEP164_KAN630-7_2.tif:0005-0198	1.855	271.076	0	2083	23.68	22.482	0.969	502.859	39035	1.156	0.865	0.944	1.26473
981	CEP164_KAN630-7_2.tif:0006-0230	0.876	20.441	0	87	130.877	26.16	0.956	17.906	1390	1.151	0.869	0.971	0.045036
982	CEP164_KAN630-7_2.tif:0007-0372	2.151	190.078	0	1196	46.531	42.215	0.919	408.921	31743	1.168	0.856	0.941	1.02847
983	CEP164_KAN630-7_2.tif:0008-0403	2.68	236.534	0	2169	114.522	45.832	0.895	633.794	49199	1.209	0.827	0.933	1.59405
984	CEP164_KAN630-7_2.tif:0009-0494	1.739	226.43	0	1630	72.411	56.074	0.929	393.785	30568	1.154	0.867	0.975	0.990403
985	CEP164_KAN630-7_2.tif:0010-0557	0.915	119.296	8	231	20.549	63.27	0.924	109.113	8470	1.13	0.885	0.993	0.274428
986	CEP164_KAN630-7_2.tif:0011-0660	1.778	232.913	0	1457	106.831	74.952	0.939	414.061	32142	1.231	0.812	0.962	1.0414
987	CEP164_KAN630-7_2.tif:0012-0664	1.765	200.226	0	1391	8.901	75.357	0.932	353.373	27431	1.105	0.905	0.948	0.888764
988	CEP164_KAN630-7_2.tif:0013-0671	1.43	223.081	0	1192	33.299	76.188	0.93	318.99	24762	1.068	0.936	0.965	0.802289
989	CEP164_KAN630-7_2.tif:0014-0790	1.971	179.634	0	1688	53.115	89.72	0.871	354.056	27484	1.336	0.748	0.927	0.890482
990	CEP164_KAN630-7_2.tif:0015-0820	2.216	228.267	0	1745	79.204	93.09	0.914	505.783	39262	1.125	0.889	0.937	1.27209
991	CEP164_KAN630-7_2.tif:0016-1050	1.456	181.469	0	830	27.637	119.24	0.947	264.163	20506	1.123	0.891	0.974	0.664394
992	CEP164_KAN630-7_2.tif:0017-1134	1.288	116.81	0	224	69.127	128.692	0.891	150.478	11681	1.45	0.689	0.926	0.378464
993	CEP164_KAN630-7_2.tif:0018-1139	2.035	158.044	0	1116	84.255	129.374	0.801	321.683	24971	1.638	0.611	0.905	0.80906
994	CEP164_KAN630-7_2.tif:0019-1169	1.34	147.519	0	614	114.512	132.744	0.882	197.64	15342	1.184	0.845	0.972	0.497081
995	CEP164_KAN630-7_2.tif:0020-1170	0.812	120.048	19	250	117.353	132.801	0.937	97.428	7563	1.039	0.963	0.992	0.245041
996	CEP164_KAN630-7_2.tif:0021-1246	1.353	179.533	0	823	138.419	141.417	0.948	242.843	18851	1.158	0.863	0.981	0.610772
997	CEP164_KAN630-7_3.tif:0001-0066	2.615	166.36	0	1432	96.648	7.441	0.837	435.047	33771	1.373	0.728	0.902	1.09418
998	CEP164_KAN630-7_3.tif:0002-0114	2.448	167.932	0	1301	39.795	12.926	0.836	411.034	31907	1.385	0.722	0.9	1.03379
999	CEP164_KAN630-7_3.tif:0003-0251	1.688	144.489	0	461	104.357	28.554	0.902	243.835	18928	1.261	0.793	0.963	0.613267
1000	CEP164_KAN630-7_3.tif:0004-0353	1.739	242.193	0	1578	17.579	40.077	0.919	421.198	32696	1.131	0.884	0.947	1.05935
1001	CEP164_KAN630-7_3.tif:0005-0410	1.688	164.45	0	563	137.75	46.625	0.927	277.522	21543	1.181	0.847	0.97	0.697993
1002	CEP164_KAN630-7_3.tif:0006-0488	2.448	210.795	0	1681	69.636	55.45	0.91	515.947	40051	1.411	0.709	0.943	1.29765
1003	CEP164_KAN630-7_3.tif:0007-0619	2.564	215.352	0	1272	85.993	70.237	0.932	552.069	42855	1.17	0.854	0.957	1.3885
1004	CEP164_KAN630-7_3.tif:0008-0639	2.048	145.17	0	673	97.341	72.508	0.883	297.348	23082	1.39	0.719	0.964	0.747857
1005	CEP164_KAN630-7_3.tif:0009-0645	2.126	164.376	0	873	141.024	73.286	0.886	349.392	27122	1.396	0.716	0.943	0.878753
1006	CEP164_KAN630-7_3.tif:0010-0757	2.383	213.978	0	2089	106.491	85.868	0.821	509.957	39586	1.519	0.658	0.907	1.28259
1007	CEP164_KAN630-7_3.tif:0011-0994	2.061	129.012	0	876	69.509	112.913	0.859	265.915	20642	1.675	0.597	0.938	0.668801
1008	CEP164_KAN630-7_3.tif:0012-1013	1.675	182.915	0	1141	12.757	115.046	0.935	306.327	23779	1.272	0.786	0.939	0.77044
1009	CEP164_KAN630-7_3.tif:0013-1014	2.383	212.941	0	1743	109.26	115.06	0.855	507.483	39394	1.408	0.71	0.956	1.27637
1010	CEP164_KAN630-7_3.tif:0014-1118	2.242	158.103	0	1010	92.462	126.945	0.853	354.391	27510	1.484	0.674	0.913	0.891324
1011	CEP164_KAN630-7_3.tif:0015-1151	1.688	154.779	0	978	4.087	130.659	0.868	261.201	20276	1.222	0.818	0.919	0.656942
1012	CEP164_KAN630-7_3.tif:0016-1199	1.726	152.112	0	888	32.713	136.105	0.833	262.579	20383	1.382	0.724	0.902	0.660409
1013	CEP164_KAN630-7_3.tif:0017-1229	2.254	174.48	0	1536	135.706	139.465	0.794	393.347	30534	1.622	0.617	0.886	0.989302
1014	CEP164_KAN630-7_4.tif:0001-0057	1.353	95.638	0	225	65.163	6.525	0.88	129.364	10042	1.516	0.66	0.95	0.325361
1015	CEP164_KAN630-7_4.tif:0002-0129	2.061	186.8	0	1571	11.161	14.666	0.88	385.025	29888	1.437	0.696	0.938	0.968371
1016	CEP164_KAN630-7_4.tif:0003-0173	2.267	134.205	0	659	114.881	19.695	0.922	304.279	23620	1.137	0.88	0.959	0.765288
1017	CEP164_KAN630-7_4.tif:0004-0236	2.473	139.828	0	771	60.882	26.775	0.86	345.85	26847	1.362	0.734	0.948	0.869843
1018	CEP164_KAN630-7_4.tif:0005-0277	2.486	151.648	0	1046	94.854	31.42	0.925	377.038	29268	1.194	0.838	0.946	0.948283
1019	CEP164_KAN630-7_4.tif:0006-0344	2.19	217.935	0	2035	134.69	39.123	0.913	477.275	37049	1.17	0.854	0.952	1.20039
1020	CEP164_KAN630-7_4.tif:0007-0379	2.551	156.187	0	1250	18.302	43.065	0.871	398.384	30925	1.446	0.692	0.923	1.00197
1021	CEP164_KAN630-7_4.tif:0008-0390	2.1	526.172	0	5647	58.447	44.313	0.952	1104.86	85766	1.1	0.909	0.962	2.77882
1022	CEP164_KAN630-7_4.tif:0009-0416	1.932	172.427	0	1391	43.803	47.249	0.876	333.187	25864	1.315	0.761	0.917	0.837994
1023	CEP164_KAN630-7_4.tif:0010-0434	2.396	180.403	0	1444	102.88	49.233	0.883	432.264	33555	1.423	0.703	0.932	1.08718
1024	CEP164_KAN630-7_4.tif:0011-0460	2.151	165.802	0	1241	54.424	52.266	0.875	356.697	27689	1.432	0.698	0.954	0.897124
1025	CEP164_KAN630-7_4.tif:0012-0579	1.945	144.728	0	459	115.367	65.788	0.914	281.529	21854	1.219	0.82	0.959	0.70807
1026	CEP164_KAN630-7_4.tif:0013-0596	2.113	239.262	0	1827	40.221	67.641	0.911	505.487	39239	1.288	0.776	0.959	1.27134
1027	CEP164_KAN630-7_4.tif:0014-0599	1.984	205.422	0	1612	17.89	68.082	0.856	407.53	31635	1.255	0.797	0.928	1.02497
1028	CEP164_KAN630-7_4.tif:0015-0639	2.151	229.359	0	1687	89.039	72.497	0.896	493.429	38303	1.342	0.745	0.949	1.24102
1029	CEP164_KAN630-7_4.tif:0016-0641	1.739	127.741	0	518	62.816	72.819	0.929	222.154	17245	1.246	0.803	0.978	0.558738
1030	CEP164_KAN630-7_4.tif:0017-0664	1.971	200.869	0	1003	139.374	75.367	0.951	395.91	30733	1.24	0.806	0.971	0.995749
1031	CEP164_KAN630-7_4.tif:0018-0824	1.095	116.471	0	302	52.857	93.498	0.898	127.534	9900	1.166	0.858	0.977	0.32076
1032	CEP164_KAN630-7_4.tif:0019-0858	2.01	229.647	0	1228	112.632	97.381	0.984	461.507	35825	1.068	0.936	0.951	1.16073
1033	CEP164_KAN630-7_4.tif:0020-0918	1.829	150.092	0	1208	2.133	104.217	0.809	274.559	21313	1.25	0.8	0.885	0.690541
1034	CEP164_KAN630-7_4.tif:0021-0986	1.688	249.565	0	1669	88.478	111.972	0.902	421.159	32693	1.197	0.835	0.96	1.05925
1035	CEP164_KAN630-7_4.tif:0022-1021	1.533	181.975	0	1326	45.756	115.95	0.928	278.965	21655	1.195	0.837	0.956	0.701622
1036	CEP164_KAN630-7_4.tif:0023-1104	1.894	221	0	1744	72.451	125.307	0.9	418.506	32487	1.286	0.778	0.98	1.05258
1037	CEP164_KAN630-7_4.tif:0024-1151	1.997	159.342	0	1138	32.509	130.681	0.853	318.166	24698	1.461	0.684	0.923	0.800215
1038	CEP164_KAN630-7_4.tif:0025-1157	1.623	158.365	0	848	18.619	131.373	0.917	257.052	19954	1.211	0.826	0.94	0.64651
1039	CEP164_KAN630-7_4.tif:0026-1163	1.005	118.295	0	249	126.996	131.989	0.896	118.865	9227	1.265	0.791	0.987	0.298955
1040	CEP164_KAN630-7_4.tif:0027-1236	1.907	191	0	1106	120.371	140.327	0.896	364.155	28268	1.315	0.761	0.964	0.915883
1041	CEP164_KAN630-7_4.tif:0028-1254	1.932	161.06	0	1366	78.523	142.393	0.922	311.222	24159	1.241	0.806	0.935	0.782752
										27931.2				0.904972
1042	CEP164_KAN630-8_1.tif:0001-0027	1.237	126.177	0	591	111.92	3.054	0.936	156.043	12113	1.007	0.993	0.98	0.392461
1043	CEP164_KAN630-8_1.tif:0002-0049	1.481	122.374	0	670	57.632	5.592	0.924	181.292	14073	1.392	0.718	0.954	0.455965
1044	CEP164_KAN630-8_1.tif:0003-0056	1.713	89.677	0	586	130.844	6.36	0.835	153.647	11927	1.592	0.628	0.943	0.386435
1045	CEP164_KAN630-8_1.tif:0004-0116	1.855	136.688	0	749	23.966	13.203	0.929	253.561	19683	1.271	0.787	0.976	0.637729
1046	CEP164_KAN630-8_1.tif:0005-0134	1.404	166.541	0	932	50.691	15.242	0.913	233.852	18153	1.108	0.903	0.956	0.588157
1047	CEP164_KAN630-8_1.tif:0006-0317	1.43	112.793	0	425	22.575	35.944	0.93	161.286	12520	1.189	0.841	0.969	0.405648
1048	CEP164_KAN630-8_1.tif:0007-0330	1.211	121.851	0	486	139.44	37.498	0.947	147.553	11454	1.234	0.81	0.979	0.37111
1049	CEP164_KAN630-8_1.tif:0008-0379	1.224	153.263	0	743	111.627	43.084	0.926	187.566	14560	1.232	0.812	0.979	0.471744
1050	CEP164_KAN630-8_1.tif:0009-0396	1.726	151.701	0	1030	90.218	44.993	0.888	261.87	20328	1.336	0.748	0.944	0.658627
1051	CEP164_KAN630-8_1.tif:0010-0414	1.172	98.934	0	494	18.805	46.987	0.948	115.979	9003	1.07	0.935	0.963	0.291697
1052	CEP164_KAN630-8_1.tif:0011-0484	1.353	108.943	0	283	134.442	54.93	0.935	147.36	11439	1.04	0.961	0.95	0.370624
1053	CEP164_KAN630-8_1.tif:0012-0764	1.623	135.913	0	739	38.493	86.802	0.943	220.609	17125	1.329	0.752	0.966	0.55485
1054	CEP164_KAN630-8_1.tif:0013-0804	1.868	166.11	0	1033	72.339	91.297	0.878	310.282	24086	1.24	0.806	0.945	0.780386
1055	CEP164_KAN630-8_1.tif:0014-0838	1.52	177.364	0	1201	11.633	95.208	0.869	269.613	20929	1.148	0.871	0.952	0.6781
1056	CEP164_KAN630-8_1.tif:0015-0841	1.984	147.896	0	1003	131.577	95.569	0.807	293.406	22776	1.61	0.621	0.917	0.737942
1057	CEP164_KAN630-8_1.tif:0016-0899	1.417	120.409	0	435	117.735	102.095	0.95	170.625	13245	1.143	0.875	0.969	0.429138
1058	CEP164_KAN630-8_1.tif:0017-0992	1.391	101.222	0	335	62.991	112.555	0.933	140.829	10932	1.217	0.821	0.956	0.354197
1059	CEP164_KAN630-8_1.tif:0018-0993	1.559	91.554	0	326	81.554	112.691	0.944	142.71	11078	1.119	0.894	0.964	0.358927
1060	CEP164_KAN630-8_1.tif:0019-1011	1.52	133.636	0	862	4.158	114.76	0.894	203.14	15769	1.345	0.743	0.971	0.510916
1061	CEP164_KAN630-8_1.tif:0020-1081	1.675	136	0	869	124.586	122.718	0.861	227.758	17680	1.338	0.747	0.929	0.572832
1062	CEP164_KAN630-8_1.tif:0021-1184	1.907	138.946	0	932	88.081	134.385	0.896	264.911	20564	1.239	0.807	0.949	0.666274
1063	CEP164_KAN630-8_1.tif:0022-1215	1.546	85.517	0	522	16.372	137.918	0.849	132.198	10262	1.579	0.633	0.945	0.332489
1064	CEP164_KAN630-8_1.tif:0023-1269	1.868	103.676	0	562	47.452	144.073	0.869	193.659	15033	1.336	0.749	0.912	0.487069
1065	CEP164_KAN630-8_1.tif:0024-1273	0.928	114.694	0	391	68.945	144.547	0.889	106.382	8258	1.578	0.634	0.973	0.267559
1066	CEP164_KAN630-8_2.tif:0001-0108	1.481	94.539	0	499	75.029	12.32	0.679	140.056	10872	1.742	0.574	0.827	0.352253
1067	CEP164_KAN630-8_2.tif:0002-0147	1.559	151.686	0	993	15.842	16.751	0.833	236.441	18354	1.539	0.65	0.931	0.59467
1068	CEP164_KAN630-8_2.tif:0003-0153	1.907	121.723	0	899	67.111	17.441	0.783	232.074	18015	1.487	0.672	0.908	0.583686
1069	CEP164_KAN630-8_2.tif:0004-0197	1.623	87.238	0	412	115.593	22.444	0.835	141.602	10992	1.377	0.726	0.913	0.356141
1070	CEP164_KAN630-8_2.tif:0005-0236	2.151	126.79	0	793	51.192	26.865	0.887	272.769	21174	1.454	0.688	0.933	0.686038
1071	CEP164_KAN630-8_2.tif:0006-0466	2.383	132.686	0	1288	90.443	52.908	0.839	316.221	24547	1.358	0.736	0.9	0.795323
1072	CEP164_KAN630-8_2.tif:0007-0555	1.443	131.366	0	907	2.017	62.999	0.911	189.537	14713	1.24	0.807	0.97	0.476701
1073	CEP164_KAN630-8_2.tif:0008-0575	1.919	101.141	0	674	36.16	65.318	0.836	194.136	15070	1.504	0.665	0.952	0.488268
1074	CEP164_KAN630-8_2.tif:0009-0591	1.752	102.368	0	341	11.218	67.053	0.854	179.347	13922	1.595	0.627	0.954	0.451073
1075	CEP164_KAN630-8_2.tif:0010-0681	1.533	131.773	0	705	133.318	77.312	0.928	202.007	15681	1.227	0.815	0.964	0.508064
1076	CEP164_KAN630-8_2.tif:0011-0745	1.507	88.923	0	295	31.558	84.555	0.851	134.027	10404	1.401	0.714	0.907	0.33709
1077	CEP164_KAN630-8_2.tif:0012-0750	1.894	150.762	0	1091	77.823	85.248	0.837	285.496	22162	1.56	0.641	0.927	0.718049
1078	CEP164_KAN630-8_2.tif:0013-0863	2.01	132.276	0	654	45.935	97.959	0.889	265.825	20635	1.249	0.801	0.94	0.668574
1079	CEP164_KAN630-8_2.tif:0014-0895	1.945	121.424	0	938	118.418	101.629	0.905	236.196	18335	1.242	0.805	0.932	0.594054
1080	CEP164_KAN630-8_2.tif:0015-0978	1.932	134.74	0	1121	94.289	110.971	0.825	260.363	20211	1.527	0.655	0.888	0.654836
1081	CEP164_KAN630-8_2.tif:0016-1005	1.533	128.336	0	766	4.305	114.105	0.767	196.738	15272	1.302	0.768	0.875	0.494813
1082	CEP164_KAN630-8_2.tif:0017-1172	1.404	116.67	0	672	76.574	133.051	0.886	163.824	12717	1.242	0.805	0.952	0.412031
1083	CEP164_KAN630-8_2.tif:0018-1222	1.559	125.281	0	846	48.487	138.682	0.906	195.282	15159	1.024	0.977	0.917	0.491152
1084	CEP164_KAN630-8_2.tif:0019-1272	1.069	225.675	0	885	21.887	144.452	0.877	241.297	18731	1.059	0.945	0.96	0.606884
1085	CEP164_KAN630-8_3.tif:0001-0063	1.275	134.03	0	700	100.533	7.135	0.922	170.935	13269	1.336	0.748	0.966	0.429916
1086	CEP164_KAN630-8_3.tif:0002-0079	1.688	113.817	0	609	50.339	8.981	0.814	192.074	14910	1.232	0.812	0.876	0.483084
1087	CEP164_KAN630-8_3.tif:0003-0209	1.649	194.602	0	1137	41.887	23.712	0.931	320.884	24909	1.198	0.835	0.959	0.807052
1088	CEP164_KAN630-8_3.tif:0004-0447	1.507	124.692	0	700	128.483	50.777	0.912	187.939	14589	1.189	0.841	0.947	0.472684
1089	CEP164_KAN630-8_3.tif:0005-0462	1.559	126.653	0	695	18.904	52.538	0.906	197.421	15325	1.253	0.798	0.942	0.49653
1090	CEP164_KAN630-8_3.tif:0006-0559	1.855	149.236	0	929	67.982	63.495	0.872	276.84	21490	1.425	0.702	0.947	0.696276
1091	CEP164_KAN630-8_3.tif:0007-0649	1.881	127.842	0	407	84.088	73.768	0.921	240.447	18665	1.354	0.739	0.936	0.604746
1092	CEP164_KAN630-8_3.tif:0008-0697	1.25	128.67	0	584	43.805	79.218	0.904	160.783	12481	1.117	0.895	0.946	0.404384
1093	CEP164_KAN630-8_3.tif:0009-0826	1.404	110.193	0	394	18.739	93.739	0.942	154.729	12011	1.252	0.799	0.96	0.389156
1094	CEP164_KAN630-8_3.tif:0010-0953	1.366	175.981	0	763	126.893	108.222	0.957	240.306	18654	1.099	0.91	0.981	0.60439
1095	CEP164_KAN630-8_3.tif:0011-0963	1.533	144.916	0	917	56.979	109.365	0.902	222.154	17245	1.355	0.738	0.96	0.558738
1096	CEP164_KAN630-8_3.tif:0012-1110	1.005	140.346	0	584	25.6	126.036	0.963	141.022	10947	1.032	0.969	0.981	0.354683
1097	CEP164_KAN630-8_3.tif:0013-1253	1.366	100.123	0	475	113.676	142.288	0.78	136.719	10613	1.321	0.757	0.891	0.343861
1098	CEP164_KAN630-8_4.tif:0001-0053	0.979	120.829	0	212	84.898	6.016	0.939	118.298	9183	1.299	0.77	0.974	0.297529
1099	CEP164_KAN630-8_4.tif:0002-0167	1.572	158.721	0	1028	13.426	19.044	0.924	249.452	19364	1.138	0.878	0.972	0.627394
1100	CEP164_KAN630-8_4.tif:0003-0224	1.816	157.468	0	1073	94.84	25.455	0.854	286.025	22203	1.389	0.72	0.928	0.719377
1101	CEP164_KAN630-8_4.tif:0004-0340	1.778	138.877	0	449	42.781	38.666	0.88	246.888	19165	1.483	0.674	0.942	0.620946
1102	CEP164_KAN630-8_4.tif:0005-0470	1.623	165.397	0	1152	86.966	53.384	0.917	268.466	20840	1.111	0.9	0.944	0.675216
1103	CEP164_KAN630-8_4.tif:0006-0521	1.391	153.046	0	825	9.585	59.141	0.962	212.931	16529	1.027	0.974	0.969	0.53554
1104	CEP164_KAN630-8_4.tif:0007-0521	1.417	119.791	0	275	126.72	59.186	0.95	169.749	13177	1.179	0.848	0.961	0.426935
1105	CEP164_KAN630-8_4.tif:0008-0635	1.829	148.373	0	857	97.234	72.156	0.93	271.416	21069	1.042	0.96	0.934	0.682636
1106	CEP164_KAN630-8_4.tif:0009-0638	1.7	115.015	0	583	56.563	72.419	0.898	195.578	15182	1.353	0.739	0.943	0.491897
1107	CEP164_KAN630-8_4.tif:0010-0749	1.572	149.451	0	601	63.993	85.068	0.924	234.882	18233	1.289	0.776	0.976	0.590749
1108	CEP164_KAN630-8_4.tif:0011-0773	1.765	119.314	0	485	26.549	87.757	0.907	210.573	16346	1.142	0.875	0.938	0.52961
1109	CEP164_KAN630-8_4.tif:0012-0836	2.061	140.656	0	590	119.04	94.843	0.948	289.915	22505	1.159	0.863	0.933	0.729162
1110	CEP164_KAN630-8_4.tif:0013-0952	1.868	140.559	0	959	111.508	108.101	0.976	262.553	20381	1.052	0.95	0.948	0.660344
1111	CEP164_KAN630-8_4.tif:0014-0971	1.366	174.783	0	1058	17.243	110.209	0.975	238.669	18527	1.336	0.748	0.964	0.600275
1112	CEP164_KAN630-8_4.tif:0015-0985	1.623	123.421	0	726	60.091	111.825	0.867	200.332	15551	1.299	0.77	0.94	0.503852
1113	CEP164_KAN630-8_4.tif:0016-1161	1.069	84.783	0	219	47.154	131.745	0.974	90.652	7037	1.108	0.903	0.971	0.227999
										16116.1				0.52216
1114	CEP164_KAN630-9_1.tif:0001-0128	1.185	94.957	0	450	111.821	14.512	0.868	112.539	8736	1.519	0.658	0.984	0.283046
1115	CEP164_KAN630-9_1.tif:0002-0143	1.417	91.018	0	457	101.086	16.276	0.98	128.977	10012	1.133	0.883	0.965	0.324389
1116	CEP164_KAN630-9_1.tif:0003-0162	1.52	147.237	0	737	76.053	18.399	0.894	223.816	17374	1.321	0.757	0.963	0.562918
1117	CEP164_KAN630-9_1.tif:0004-0164	1.456	194.593	0	1154	60.77	18.653	0.947	283.268	21989	1.037	0.964	0.966	0.712444
1118	CEP164_KAN630-9_1.tif:0005-0167	1.056	84.28	0	380	39.794	19.039	0.866	89.029	6911	1.179	0.848	0.953	0.223916
1119	CEP164_KAN630-9_1.tif:0006-0231	0.979	116.934	0	315	25.726	26.296	0.905	114.485	8887	1.067	0.937	0.968	0.287939
1120	CEP164_KAN630-9_1.tif:0007-0303	1.494	96.983	0	416	17.709	34.442	0.932	144.925	11250	1.303	0.768	0.955	0.3645
1121	CEP164_KAN630-9_1.tif:0008-0321	0.824	213.797	0	1198	97.27	36.434	0.914	176.268	13683	1	1	1	0.443329
1122	CEP164_KAN630-9_1.tif:0009-0431	1.61	143.056	0	923	8.73	48.876	0.91	230.36	17882	1.401	0.714	0.958	0.579377
1123	CEP164_KAN630-9_1.tif:0010-0505	1.172	92.736	0	258	47.846	57.373	0.917	108.713	8439	1.293	0.773	0.963	0.273424
1124	CEP164_KAN630-9_1.tif:0011-0545	1.417	142.645	0	863	112.904	61.854	0.894	202.135	15691	1.208	0.828	0.961	0.508388
1125	CEP164_KAN630-9_1.tif:0012-0576	1.147	96.483	0	307	40.511	65.406	0.868	110.62	8587	1.271	0.787	0.947	0.278219
1126	CEP164_KAN630-9_1.tif:0013-0697	1.224	167.916	0	864	87.576	79.166	0.926	205.498	15952	1.232	0.812	0.979	0.516845
1127	CEP164_KAN630-9_1.tif:0014-0817	1.353	143.829	0	609	55.392	92.771	0.948	194.548	15102	1.12	0.893	0.981	0.489305
1128	CEP164_KAN630-9_1.tif:0015-0885	1.765	166.343	0	1097	113.477	100.505	0.932	293.574	22789	1.049	0.954	0.948	0.738364
1129	CEP164_KAN630-9_1.tif:0016-0927	1.224	108.853	0	316	2.596	105.219	0.957	133.215	10341	1.073	0.932	0.979	0.335048
1130	CEP164_KAN630-9_1.tif:0017-1047	1.134	53.773	0	136	33.657	118.921	0.887	60.959	4732	1.29	0.775	0.946	0.153317
1131	CEP164_KAN630-9_1.tif:0018-1117	0.773	56.767	0	132	104.834	126.842	0.929	43.877	3406	1.298	0.77	0.976	0.110354
1132	CEP164_KAN630-9_1.tif:0019-1182	1.7	272.25	0	1851	63.288	134.211	0.961	462.949	35937	1.237	0.809	0.974	1.16436
1133	CEP164_KAN630-9_1.tif:0020-1273	1.108	181.523	0	628	93.694	144.495	0.909	201.105	15611	1.373	0.728	0.989	0.505796
1134	CEP164_KAN630-9_2.tif:0001-0013	0.799	165.323	0	625	144.548	1.525	0.922	132.043	10250	1.288	0.776	0.992	0.3321
1135	CEP164_KAN630-9_2.tif:0002-0017	1.559	158.769	0	1059	116.275	1.948	0.88	247.481	19211	1.271	0.787	0.924	0.622436
1136	CEP164_KAN630-9_2.tif:0003-0083	1.069	88.12	0	266	59.153	9.447	0.877	94.221	7314	1.391	0.719	0.976	0.236974
1137	CEP164_KAN630-9_2.tif:0004-0095	1.585	105.959	0	592	70.656	10.807	0.921	167.894	13033	1.265	0.79	0.946	0.422269
1138	CEP164_KAN630-9_2.tif:0005-0138	1.829	93.873	0	591	91.935	15.724	0.809	171.72	13330	1.462	0.684	0.885	0.431892
1139	CEP164_KAN630-9_2.tif:0006-0312	1.224	102.389	0	539	82.733	35.385	0.897	125.306	9727	1.058	0.945	0.974	0.315155
1140	CEP164_KAN630-9_2.tif:0007-0514	1.443	89.67	0	430	136.73	58.36	0.899	129.376	10043	1.361	0.735	0.937	0.325393
1141	CEP164_KAN630-9_2.tif:0008-0644	1.069	86.096	0	413	132.083	73.108	0.877	92.057	7146	1.414	0.707	0.971	0.23153
1142	CEP164_KAN630-9_2.tif:0009-0733	1.52	188.754	0	998	61.46	83.16	0.948	286.926	22273	1.085	0.922	0.959	0.721645
1143	CEP164_KAN630-9_2.tif:0010-0783	1.34	106.183	0	564	115.111	88.862	0.821	142.259	11043	1.487	0.673	0.941	0.357793
1144	CEP164_KAN630-9_2.tif:0011-0803	1.108	110.57	0	302	6.016	91.197	0.974	122.497	9509	1.11	0.901	0.977	0.308092
1145	CEP164_KAN630-9_2.tif:0012-0900	1.314	106.706	0	497	92.796	102.158	0.95	140.21	10884	1.135	0.881	0.962	0.352642
1146	CEP164_KAN630-9_2.tif:0013-0900	0.799	118.387	0	693	103.172	102.15	0.96	94.556	7340	1.081	0.925	0.984	0.237816
1147	CEP164_KAN630-9_2.tif:0014-1003	1.005	114.397	0	483	55.048	113.841	0.929	114.948	8923	1.259	0.794	0.987	0.289105
1148	CEP164_KAN630-9_2.tif:0015-1060	0.773	88.95	5	194	141.122	120.346	0.929	68.753	5337	1.305	0.766	0.984	0.172919
1149	CEP164_KAN630-9_3.tif:0001-0065	0.902	107	0	368	60.507	7.434	0.947	96.488	7490	1.125	0.889	0.986	0.242676
1150	CEP164_KAN630-9_3.tif:0002-0288	1.301	140.881	0	697	142.391	32.721	0.9	183.302	14229	1.405	0.712	0.948	0.46102
1151	CEP164_KAN630-9_3.tif:0003-0302	1.34	122.212	0	455	27.171	34.293	0.91	163.733	12710	1.09	0.917	0.972	0.411804
1152	CEP164_KAN630-9_3.tif:0004-0403	1.327	111.903	0	331	120.474	45.714	0.901	148.481	11526	1.074	0.931	0.972	0.373442
1153	CEP164_KAN630-9_3.tif:0005-0433	1.159	80.111	0	369	50.708	49.163	0.938	92.881	7210	1.188	0.842	0.957	0.233604
1154	CEP164_KAN630-9_3.tif:0006-0527	1.121	149.253	0	658	97.114	59.82	0.919	167.276	12985	1.107	0.903	0.983	0.420714
1155	CEP164_KAN630-9_3.tif:0007-0557	1.031	52.275	0	341	121.995	63.268	0.973	53.874	4182	1.175	0.851	0.952	0.135497
1156	CEP164_KAN630-9_3.tif:0008-0591	0.812	103.476	0	326	15.316	67.085	0.937	83.979	6519	1.039	0.963	0.992	0.211216
1157	CEP164_KAN630-9_3.tif:0009-0741	1.572	132.869	0	573	69.682	84.135	0.951	208.821	16210	1.104	0.906	0.968	0.525204
1158	CEP164_KAN630-9_3.tif:0010-0940	1.275	137.97	0	604	29.861	106.656	0.866	175.959	13659	1.136	0.88	0.947	0.442552
1159	CEP164_KAN630-9_3.tif:0011-1015	1.082	114.357	0	458	84.217	115.259	0.951	123.747	9606	1.207	0.828	0.977	0.311234
1160	CEP164_KAN630-9_3.tif:0012-1021	0.992	107.273	0	404	126.608	115.939	0.917	106.407	8260	1.122	0.891	0.975	0.267624
1161	CEP164_KAN630-9_3.tif:0013-1081	0.812	110.317	0	341	28.709	122.7	0.937	89.532	6950	1.039	0.963	0.992	0.22518
1162	CEP164_KAN630-9_3.tif:0014-1117	0.812	96.714	0	287	83.076	126.786	0.937	78.492	6093	1.039	0.963	0.992	0.197413
1163	CEP164_KAN630-9_4.tif:0001-0087	1.997	124.555	0	734	66.824	9.942	0.874	248.705	19306	1.344	0.744	0.912	0.625514
1164	CEP164_KAN630-9_4.tif:0002-0121	2.177	129.379	0	1081	99.557	13.791	0.764	281.67	21865	1.684	0.594	0.931	0.708426
1165	CEP164_KAN630-9_4.tif:0003-0160	1.469	120.816	0	608	22.816	18.125	0.853	177.427	13773	1.479	0.676	0.908	0.446245
1166	CEP164_KAN630-9_4.tif:0004-0237	1.662	82.612	0	452	42.227	26.938	0.832	137.286	10657	1.396	0.716	0.918	0.345287
1167	CEP164_KAN630-9_4.tif:0005-0240	1.443	159.982	0	1044	108.471	27.308	0.911	230.824	17918	1.023	0.978	0.966	0.580543
1168	CEP164_KAN630-9_4.tif:0006-0290	1.623	145.397	0	934	81.966	32.931	0.892	236.003	18320	1.267	0.789	0.955	0.593568
1169	CEP164_KAN630-9_4.tif:0007-0310	1.469	103.307	0	433	139.711	35.229	0.864	151.714	11777	1.278	0.782	0.938	0.381575
1170	CEP164_KAN630-9_4.tif:0008-0422	1.572	103.508	0	758	109.017	47.889	0.924	162.677	12628	1.171	0.854	0.968	0.409147
1171	CEP164_KAN630-9_4.tif:0009-0422	1.765	64.781	0	393	52.795	47.854	0.817	114.33	8875	1.591	0.628	0.955	0.28755
1172	CEP164_KAN630-9_4.tif:0010-0459	0.915	113.394	0	468	35.589	52.102	0.924	103.715	8051	1.13	0.885	0.993	0.260852
1173	CEP164_KAN630-9_4.tif:0011-0528	1.391	68.444	0	375	123.03	59.969	0.894	95.226	7392	1.451	0.689	0.927	0.239501
1174	CEP164_KAN630-9_4.tif:0012-0647	2.164	115.97	0	979	97.399	73.422	0.86	250.985	19483	1.425	0.702	0.944	0.631249
1175	CEP164_KAN630-9_4.tif:0013-0736	1.43	216.865	0	1204	36.641	83.598	0.93	310.102	24072	1.021	0.979	0.965	0.779933
1176	CEP164_KAN630-9_4.tif:0014-0755	1.662	99.519	0	522	69.35	85.764	0.854	165.382	12838	1.421	0.704	0.921	0.415951
1177	CEP164_KAN630-9_4.tif:0015-0767	1.198	128.645	0	547	139.218	87.103	0.937	154.123	11964	1.276	0.784	0.974	0.387634
1178	CEP164_KAN630-9_4.tif:0016-0777	1.147	109.146	0	604	51.966	88.286	0.868	125.138	9714	1.275	0.785	0.947	0.314734
1179	CEP164_KAN630-9_4.tif:0017-0836	0.992	49.26	0	286	83.493	94.906	0.903	48.862	3793	1.148	0.871	0.922	0.122893
1180	CEP164_KAN630-9_4.tif:0018-0884	1.224	168.126	0	810	14.646	100.349	0.957	205.755	15972	1.073	0.932	0.979	0.517493
1181	CEP164_KAN630-9_4.tif:0019-0944	0.799	137.145	0	428	48.578	107.144	0.96	109.538	8503	1.081	0.925	0.984	0.275497
1182	CEP164_KAN630-9_4.tif:0020-0953	1.34	127.702	0	664	143.558	108.202	0.927	171.089	13281	1.367	0.732	0.959	0.430304
1183	CEP164_KAN630-9_4.tif:0021-1014	1.636	81.543	0	367	130.589	115.095	0.864	133.409	10356	1.386	0.721	0.917	0.335534
1184	CEP164_KAN630-9_4.tif:0022-1117	1.018	137.759	0	613	117.354	126.786	0.908	140.198	10883	1.252	0.799	0.994	0.352609
1185	CEP164_KAN630-9_4.tif:0023-1122	0.812	103.206	0	332	114.402	127.353	0.937	83.76	6502	1.039	0.963	0.992	0.210665
1186	CEP164_KAN630-9_4.tif:0024-1196	0.799	119.323	0	367	11.918	135.746	0.96	95.303	7398	1.081	0.925	0.984	0.239695
										12077				0.391296
1	CEP164_KAN630-10_1.tif:0001-0051	2.357	157.754	0	1534	18.521	5.826	0.885	371.898	28869	1.445	0.692	0.958	0.935356
2	CEP164_KAN630-10_1.tif:0002-0065	2.538	138.36	0	685	84.171	7.454	0.894	351.132	27257	1.379	0.725	0.943	0.883127
3	CEP164_KAN630-10_1.tif:0003-0126	1.919	306.087	0	1989	42.209	14.311	0.95	587.521	45607	1.17	0.855	0.958	1.47767
4	CEP164_KAN630-10_1.tif:0004-0153	2.306	239.218	0	2035	91.726	17.396	0.886	551.618	42820	1.229	0.814	0.942	1.38737
5	CEP164_KAN630-10_1.tif:0005-0173	2.911	213.562	0	1481	118.697	19.69	0.819	621.762	48265	1.651	0.606	0.928	1.56379
6	CEP164_KAN630-10_1.tif:0006-0331	1.997	251.31	0	1705	12.797	37.553	0.953	501.802	38953	1.093	0.915	0.948	1.26208
7	CEP164_KAN630-10_1.tif:0007-0414	1.894	270.599	0	2011	68.052	47.016	0.938	512.43	39778	1.253	0.798	0.955	1.28881
8	CEP164_KAN630-10_1.tif:0008-0441	1.649	209.766	0	1242	27.801	50.044	0.881	345.888	26850	1.261	0.793	0.959	0.86994
9	CEP164_KAN630-10_1.tif:0009-0447	1.662	295.566	0	1739	90.429	50.723	0.939	491.175	38128	1.047	0.955	0.959	1.23535
10	CEP164_KAN630-10_1.tif:0010-0623	1.7	246.432	0	1467	116.475	70.711	0.934	419.047	32529	1.099	0.91	0.971	1.05394
11	CEP164_KAN630-10_1.tif:0011-0653	1.816	181.454	0	755	139.933	74.167	0.96	329.592	25585	1.132	0.884	0.966	0.828954
12	CEP164_KAN630-10_1.tif:0012-0696	1.417	121.8	0	478	5.201	79.01	0.95	172.596	13398	1.234	0.81	0.969	0.434095
13	CEP164_KAN630-10_1.tif:0013-0704	1.726	281.41	0	1635	52.755	79.904	0.948	485.777	37709	1.064	0.94	0.971	1.22177
14	CEP164_KAN630-10_1.tif:0014-0793	2.035	200.981	0	1209	73.124	90.069	0.9	409.076	31755	1.29	0.775	0.958	1.02886
15	CEP164_KAN630-10_1.tif:0015-0844	1.997	215	0	1485	90.696	95.816	0.905	429.301	33325	1.3	0.769	0.945	1.07973
16	CEP164_KAN630-10_1.tif:0016-0918	2.564	158.613	0	880	105.324	104.229	0.903	406.615	31564	1.403	0.713	0.945	1.02267
17	CEP164_KAN630-10_1.tif:0017-1079	2.048	151.472	0	1185	50.667	122.522	0.896	310.256	24084	1.346	0.743	0.924	0.780322
18	CEP164_KAN630-10_1.tif:0018-1103	1.481	206.983	0	1141	29.855	125.196	0.908	306.636	23803	1.218	0.821	0.979	0.771217
19	CEP164_KAN630-10_1.tif:0019-1196	1.662	219.256	0	1055	101.396	135.831	0.966	364.362	28284	1.163	0.86	0.966	0.916402
20	CEP164_KAN630-10_1.tif:0020-1231	1.713	177.955	0	1134	137.623	139.718	0.905	304.897	23668	1.195	0.837	0.937	0.766843
21	CEP164_KAN630-10_2.tif:0001-0016	2.448	182.937	0	1070	142.362	1.779	0.862	447.761	34758	1.343	0.744	0.925	1.12616
22	CEP164_KAN630-10_2.tif:0002-0064	2.654	196.796	0	1883	71.254	7.292	0.842	522.246	40540	1.429	0.7	0.912	1.3135
23	CEP164_KAN630-10_2.tif:0003-0106	2.035	107.968	0	514	125.78	12.151	0.79	219.758	17059	1.615	0.619	0.919	0.552712
24	CEP164_KAN630-10_2.tif:0004-0116	1.404	125.606	0	397	55.637	13.16	0.886	176.371	13691	1.23	0.813	0.956	0.443588
25	CEP164_KAN630-10_2.tif:0005-0133	2.422	195.649	0	1587	41.073	15.146	0.922	473.835	36782	1.395	0.717	0.949	1.19174
26	CEP164_KAN630-10_2.tif:0006-0159	2.216	204.86	0	1557	67.772	17.999	0.901	453.919	35236	1.342	0.745	0.966	1.14165
27	CEP164_KAN630-10_2.tif:0007-0203	2.37	199.897	0	1628	100.398	23.149	0.85	473.822	36781	1.322	0.756	0.948	1.1917
28	CEP164_KAN630-10_2.tif:0008-0339	2.216	204.622	0	1540	67.812	38.53	0.86	453.391	35195	1.434	0.697	0.966	1.14032
29	CEP164_KAN630-10_2.tif:0009-0360	2.319	203.739	0	1929	16.926	40.897	0.882	472.431	36673	1.315	0.761	0.94	1.18821
30	CEP164_KAN630-10_2.tif:0010-0390	2.576	223.63	0	1710	111.862	44.298	0.888	576.172	44726	1.274	0.785	0.932	1.44912
31	CEP164_KAN630-10_2.tif:0011-0400	2.422	154.527	0	868	96.348	45.385	0.872	374.242	29051	1.383	0.723	0.931	0.941252
32	CEP164_KAN630-10_2.tif:0012-0419	1.481	288.73	0	1715	38.359	47.561	0.935	427.742	33204	1.203	0.831	0.979	1.07581
33	CEP164_KAN630-10_2.tif:0013-0544	1.984	104.357	0	429	115.769	61.746	0.89	207.031	16071	1.301	0.768	0.922	0.5207
34	CEP164_KAN630-10_2.tif:0014-0660	2.242	241.282	0	2098	88.51	74.963	0.823	540.836	41983	1.309	0.764	0.926	1.36025
35	CEP164_KAN630-10_2.tif:0015-0672	1.7	203.068	0	1317	47.607	76.34	0.898	345.309	26805	1.278	0.782	0.936	0.868482
36	CEP164_KAN630-10_2.tif:0016-0677	1.945	191.364	0	1085	11.226	76.882	0.882	372.246	28896	1.266	0.79	0.929	0.93623
37	CEP164_KAN630-10_2.tif:0017-0712	2.293	197.157	0	1780	74.229	80.843	0.797	452.09	35094	1.63	0.613	0.934	1.13705
38	CEP164_KAN630-10_2.tif:0018-0720	1.649	270.805	0	1633	123.209	81.747	0.906	446.538	34663	1.236	0.809	0.952	1.12308
39	CEP164_KAN630-10_2.tif:0019-0774	1.623	70.683	0	207	137.722	87.921	0.783	114.729	8906	1.862	0.537	0.89	0.288554
40	CEP164_KAN630-10_2.tif:0020-0906	1.572	249.434	0	1374	33.004	102.888	0.898	392.02	30431	1.322	0.756	0.972	0.985964
41	CEP164_KAN630-10_2.tif:0021-1043	2.254	224.234	0	1568	102.257	118.424	0.908	505.512	39241	1.287	0.777	0.936	1.27141
42	CEP164_KAN630-10_2.tif:0022-1088	1.649	172.812	0	805	121.224	123.479	0.906	284.955	22120	1.266	0.79	0.955	0.716688
43	CEP164_KAN630-10_2.tif:0023-1097	1.572	211.369	0	1305	144.402	124.498	0.888	332.195	25787	1.484	0.674	0.949	0.835499
44	CEP164_KAN630-10_2.tif:0024-1192	1.404	75.321	0	218	29.235	135.276	0.85	105.763	8210	1.54	0.649	0.928	0.266004
45	CEP164_KAN630-10_3.tif:0001-0075	2.164	151.321	0	908	125.172	8.567	0.924	327.493	25422	1.356	0.737	0.955	0.823673
46	CEP164_KAN630-10_3.tif:0002-0117	2.332	200.204	0	1571	34.854	13.309	0.84	466.814	36237	1.595	0.627	0.912	1.17408
47	CEP164_KAN630-10_3.tif:0003-0274	2.074	148.155	0	1059	83.507	31.195	0.886	307.28	23853	1.3	0.769	0.939	0.772837
48	CEP164_KAN630-10_3.tif:0004-0288	2.77	207.005	0	1470	78.989	32.805	0.764	573.338	44506	1.744	0.573	0.87	1.44199
49	CEP164_KAN630-10_3.tif:0005-0436	1.791	240.18	0	1649	41.007	49.548	0.972	430.074	33385	1.081	0.925	0.959	1.08167
50	CEP164_KAN630-10_3.tif:0006-0599	2.396	238.468	0	1708	86.852	68.076	0.943	571.392	44355	1.249	0.801	0.964	1.4371
51	CEP164_KAN630-10_3.tif:0007-0622	1.842	140.748	0	819	30.149	70.628	0.823	259.281	20127	1.158	0.864	0.929	0.652115
52	CEP164_KAN630-10_3.tif:0008-0735	1.919	117.718	0	396	60.418	83.475	0.87	225.955	17540	1.495	0.669	0.928	0.568296
53	CEP164_KAN630-10_3.tif:0009-0805	2.113	195.634	0	1243	136.242	91.394	0.868	413.314	32084	1.473	0.679	0.976	1.03952
54	CEP164_KAN630-10_3.tif:0010-0811	3.581	966.993	0	6783	143.603	92.05	0.861	3463.06	268824	1.418	0.705	0.952	8.7099
55	CEP164_KAN630-10_3.tif:0011-0809	2.435	223.587	0	1962	73.885	91.924	0.821	544.378	42258	1.525	0.656	0.922	1.36916
56	CEP164_KAN630-10_3.tif:0012-0862	2.409	499.219	0	3493	71.31	97.835	0.926	1202.61	93354	1.173	0.853	0.964	3.02467
57	CEP164_KAN630-10_3.tif:0013-0862	2.216	126.983	0	873	19.242	97.876	0.86	281.361	21841	1.591	0.629	0.964	0.707648
58	CEP164_KAN630-10_3.tif:0014-0873	1.688	229.809	0	1402	109.749	99.081	0.953	387.82	30105	1.116	0.896	0.96	0.975402
59	CEP164_KAN630-10_3.tif:0015-1022	2.267	112.216	0	475	84.665	116.052	0.892	254.424	19750	1.435	0.697	0.951	0.6399
60	CEP164_KAN630-10_3.tif:0016-1135	1.739	175.963	0	1106	41.253	128.835	0.861	306.018	23755	1.362	0.734	0.909	0.769662
61	CEP164_KAN630-10_3.tif:0017-1182	1.778	149.667	0	634	77.556	134.232	0.939	266.07	20654	1.302	0.768	0.968	0.66919
62	CEP164_KAN630-10_4.tif:0001-0135	2.19	243.059	0	1755	116.141	15.42	0.882	532.295	41320	1.34	0.746	0.934	1.33877
63	CEP164_KAN630-10_4.tif:0002-0138	2.061	229.719	0	1912	74.283	15.608	0.911	473.487	36755	1.233	0.811	0.964	1.19086
64	CEP164_KAN630-10_4.tif:0003-0175	2.1	195.693	0	1112	91.064	19.923	0.906	410.918	31898	1.081	0.925	0.95	1.0335
65	CEP164_KAN630-10_4.tif:0004-0277	1.997	195.865	0	1437	2.652	31.39	0.853	391.092	30359	1.411	0.709	0.928	0.983632
66	CEP164_KAN630-10_4.tif:0005-0282	1.237	195.802	0	1023	99.437	32.006	0.936	242.148	18797	1.049	0.953	0.98	0.609023
67	CEP164_KAN630-10_4.tif:0006-0318	1.804	266.4	0	1992	41.427	36.125	0.903	480.456	37296	1.131	0.884	0.946	1.20839
68	CEP164_KAN630-10_4.tif:0007-0399	2.074	314.366	0	2809	67.144	45.362	0.908	652.009	50613	1.301	0.768	0.928	1.63986
69	CEP164_KAN630-10_4.tif:0008-0402	1.262	282.49	0	1339	0.811	45.646	0.913	356.632	27684	1.354	0.738	0.97	0.896962
70	CEP164_KAN630-10_4.tif:0009-0418	1.713	313.158	0	1913	126.61	47.515	0.941	536.546	41650	1.213	0.824	0.971	1.34946
71	CEP164_KAN630-10_4.tif:0010-0503	2.216	303.994	0	2445	93.818	57.138	0.923	673.574	52287	1.174	0.851	0.948	1.6941
72	CEP164_KAN630-10_4.tif:0011-0626	1.456	131.655	0	406	27.007	71.038	0.947	191.649	14877	1.203	0.832	0.974	0.482015
73	CEP164_KAN630-10_4.tif:0012-0658	2.19	229.718	0	1325	113.653	74.71	0.958	503.078	39052	1.172	0.853	0.952	1.26528
74	CEP164_KAN630-10_4.tif:0013-0688	1.932	306.013	0	2059	141.397	78.159	0.932	591.321	45902	1.032	0.969	0.952	1.48722
75	CEP164_KAN630-10_4.tif:0014-0760	2.448	201.458	0	1771	41.791	86.271	0.862	493.094	38277	1.496	0.668	0.938	1.24017
76	CEP164_KAN630-10_4.tif:0015-0785	2.203	226.684	0	1916	69.476	89.204	0.887	499.355	38763	1.346	0.743	0.942	1.25592
77	CEP164_KAN630-10_4.tif:0016-0913	2.035	234.949	0	1863	140.558	103.627	0.848	478.215	37122	1.179	0.848	0.929	1.20275
78	CEP164_KAN630-10_4.tif:0017-0936	1.005	167.679	0	1035	52.046	106.299	0.963	168.487	13079	1.032	0.969	0.981	0.42376
79	CEP164_KAN630-10_4.tif:0018-0995	1.894	206.517	0	1540	24.825	112.927	0.938	391.079	30358	1.252	0.798	0.955	0.983599
80	CEP164_KAN630-10_4.tif:0019-1016	1.585	267.407	0	1531	58.91	115.391	0.932	423.71	32891	1.081	0.925	0.965	1.06567
81	CEP164_KAN630-10_4.tif:0020-1031	2.229	171.555	0	946	101.319	116.985	0.856	382.332	29679	1.445	0.692	0.945	0.9616
82	CEP164_KAN630-10_4.tif:0021-1093	1.881	106.685	0	426	119.582	124.102	0.862	200.654	15576	1.516	0.66	0.961	0.504662
83	CEP164_KAN630-10_4.tif:0022-1147	1.559	187.884	0	1095	73.173	130.21	0.917	292.865	22734	1.113	0.899	0.964	0.736582
84	CEP164_KAN630-10_4.tif:0023-1160	1.481	219.061	0	995	11.531	131.727	0.935	324.53	25192	1.042	0.96	0.975	0.816221
85	CEP164_KAN630-10_4.tif:0024-1214	1.919	138.913	0	814	116.861	137.758	0.893	266.637	20698	1.218	0.821	0.925	0.670615
86	CEP164_KAN630-10_4.tif:0025-1246	1.275	171.949	0	852	9.015	141.493	0.866	219.295	17023	1.153	0.867	0.947	0.551545
										34210.1				1.10841
87	CEP164_KAN630-11_1.tif:0001-0042	1.932	219.82	0	1569	58.661	4.786	0.908	424.766	32973	1.178	0.849	0.952	1.06833
88	CEP164_KAN630-11_1.tif:0002-0071	1.752	96.875	0	275	15.45	8.086	0.868	169.724	13175	1.351	0.74	0.91	0.42687
89	CEP164_KAN630-11_1.tif:0003-0095	0.799	118.29	0	792	95.908	10.783	0.96	94.478	7334	1.081	0.925	0.984	0.237622
90	CEP164_KAN630-11_1.tif:0004-0113	1.765	249.949	0	1502	75.335	12.82	0.907	441.127	34243	1.137	0.88	0.945	1.10947
91	CEP164_KAN630-11_1.tif:0005-0231	2.229	145.838	0	1045	64.265	26.289	0.91	325.019	25230	1.37	0.73	0.928	0.817452
92	CEP164_KAN630-11_1.tif:0006-0252	1.095	77.353	0	245	26.689	28.592	0.949	84.701	6575	1.274	0.785	0.95	0.21303
93	CEP164_KAN630-11_1.tif:0007-0282	2.216	139.727	0	658	96.051	32.044	0.914	309.599	24033	1.381	0.724	0.948	0.778669
94	CEP164_KAN630-11_1.tif:0008-0302	1.919	233.886	0	1590	109.538	34.252	0.926	448.934	34849	1.198	0.835	0.955	1.12911
95	CEP164_KAN630-11_1.tif:0009-0402	1.919	199.557	0	1223	22.814	45.62	0.926	383.041	29734	1.174	0.851	0.952	0.963382
96	CEP164_KAN630-11_1.tif:0010-0438	1.829	180.676	0	852	52.679	49.754	0.993	330.507	25656	1.081	0.925	0.969	0.831254
97	CEP164_KAN630-11_1.tif:0011-0624	2.035	258.88	0	2223	69.403	70.807	0.947	526.923	40903	1.174	0.852	0.955	1.32526
98	CEP164_KAN630-11_1.tif:0012-0654	2.28	250.621	0	2139	97.381	74.277	0.876	571.457	44360	1.361	0.735	0.949	1.43726
99	CEP164_KAN630-11_1.tif:0013-0663	1.662	231.992	0	1639	122.69	75.291	0.913	385.527	29927	1.077	0.929	0.959	0.969635
100	CEP164_KAN630-11_1.tif:0014-0880	1.945	224.192	0	1526	31.777	99.889	0.914	436.103	33853	1.198	0.835	0.959	1.09684
101	CEP164_KAN630-11_1.tif:0015-0979	2.151	232.497	0	1481	103.836	111.183	0.941	500.179	38827	1.158	0.863	0.952	1.25799
102	CEP164_KAN630-11_1.tif:0016-1053	2.138	199.861	0	1260	56.356	119.548	0.913	427.394	33177	1.289	0.776	0.946	1.07493
103	CEP164_KAN630-11_1.tif:0017-1137	2.409	204.888	0	1126	136.793	129.035	0.917	493.571	38314	1.217	0.822	0.94	1.24137
104	CEP164_KAN630-11_1.tif:0018-1182	2.074	232.099	0	1683	71.36	134.207	0.94	481.384	37368	1.229	0.814	0.958	1.21072
105	CEP164_KAN630-11_3.tif:0001-0044	2.319	155.633	0	1476	17.084	5.029	0.843	360.883	28014	1.441	0.694	0.923	0.907654
106	CEP164_KAN630-11_3.tif:0002-0109	2.061	279.844	0	1957	87.159	12.447	0.934	576.803	44775	1.205	0.83	0.961	1.45071
107	CEP164_KAN630-11_3.tif:0003-0183	1.713	405.985	0	2631	32.432	20.809	0.915	695.59	53996	1.201	0.833	0.974	1.74947
108	CEP164_KAN630-11_3.tif:0004-0201	1.907	322.736	0	2356	132.05	22.848	0.896	615.321	47765	1.381	0.724	0.958	1.54759
109	CEP164_KAN630-11_3.tif:0005-0291	1.881	232.438	0	1609	1.605	33.012	0.884	437.172	33936	1.327	0.754	0.951	1.09953
110	CEP164_KAN630-11_3.tif:0006-0448	1.623	107.492	0	310	86.067	50.899	0.943	174.477	13544	1.248	0.801	0.947	0.438826
111	CEP164_KAN630-11_3.tif:0007-0497	2.1	211.043	0	1529	42.448	56.399	0.834	443.149	34400	1.34	0.746	0.921	1.11456
112	CEP164_KAN630-11_3.tif:0008-0543	1.842	253.028	0	1278	23.689	61.676	0.922	466.119	36183	1.125	0.889	0.969	1.17233
113	CEP164_KAN630-11_3.tif:0009-0586	1.907	166	0	739	62.733	66.568	0.92	316.491	24568	1.233	0.811	0.955	0.796003
114	CEP164_KAN630-11_3.tif:0010-0591	2.306	224.849	0	1620	143.191	67.077	0.951	518.485	40248	1.276	0.784	0.95	1.30404
115	CEP164_KAN630-11_3.tif:0011-0771	2.164	245.988	0	1469	69.33	87.455	0.88	532.372	41326	1.36	0.735	0.952	1.33896
116	CEP164_KAN630-11_3.tif:0012-0898	0.863	54.463	0	147	6.179	101.927	0.98	47.007	3649	1.115	0.897	0.964	0.118228
117	CEP164_KAN630-11_3.tif:0013-0925	2.461	191.874	0	1086	108.314	105.001	0.875	472.109	36648	1.361	0.735	0.946	1.1874
118	CEP164_KAN630-11_3.tif:0014-1000	0.799	113.339	0	604	50.621	113.5	0.96	90.524	7027	1.081	0.925	0.984	0.227675
119	CEP164_KAN630-11_3.tif:0015-1068	1.804	216.529	0	978	140.725	121.246	0.903	390.513	30314	1.101	0.908	0.952	0.982174
120	CEP164_KAN630-11_3.tif:0016-1161	1.623	150.468	0	663	45.544	131.807	0.943	244.235	18959	1.194	0.838	0.955	0.614272
121	CEP164_KAN630-11_3.tif:0017-1229	1.958	244.75	0	1267	104.54	139.509	0.944	479.246	37202	1.177	0.85	0.965	1.20534
122	CEP164_KAN630-11_3.tif:0018-1255	1.559	234.372	0	1229	9.097	142.441	0.917	365.328	28359	1.132	0.883	0.968	0.918832
123	CEP164_KAN630-11_3.tif:0019-1269	1.585	209.862	0	1053	75.708	144.073	0.932	332.53	25813	1.299	0.77	0.976	0.836341
124	CEP164_KAN630-11_4.tif:0001-0038	2.254	197.96	0	1345	119.085	4.292	0.908	446.28	34643	1.263	0.792	0.943	1.12243
125	CEP164_KAN630-11_4.tif:0002-0109	2.332	255.11	0	2439	95.405	12.395	0.917	594.838	46175	1.072	0.933	0.945	1.49607
126	CEP164_KAN630-11_4.tif:0003-0182	1.894	257.224	0	1956	21.192	20.725	0.9	487.104	37812	1.088	0.919	0.98	1.22511
127	CEP164_KAN630-11_4.tif:0004-0234	0.812	182.302	0	1105	7.497	26.565	0.937	147.953	11485	1.039	0.963	0.992	0.372114
128	CEP164_KAN630-11_4.tif:0005-0238	2.113	242.256	0	1521	22.902	27.068	0.958	511.812	39730	1.103	0.907	0.962	1.28725
129	CEP164_KAN630-11_4.tif:0006-0238	0.812	157.333	0	848	72.192	27.019	0.937	127.689	9912	1.039	0.963	0.992	0.321149
130	CEP164_KAN630-11_4.tif:0007-0242	1.688	301.229	0	1764	87.808	27.529	0.927	508.347	39461	1.218	0.821	0.967	1.27854
131	CEP164_KAN630-11_4.tif:0008-0360	2.267	251.216	0	1879	67.688	40.865	0.958	569.576	44214	1.152	0.868	0.941	1.43253
132	CEP164_KAN630-11_4.tif:0009-0394	2.319	254.206	0	1888	133.642	44.778	0.912	589.453	45757	1.037	0.964	0.95	1.48253
133	CEP164_KAN630-11_4.tif:0010-0496	1.739	288.993	0	1746	16.344	56.434	0.894	502.588	39014	1.088	0.919	0.954	1.26405
134	CEP164_KAN630-11_4.tif:0011-0528	2.126	186.133	0	1012	69.11	59.97	0.964	395.64	30712	1.102	0.907	0.965	0.995069
135	CEP164_KAN630-11_4.tif:0012-0656	2.409	223.005	0	1417	75.659	74.459	0.926	537.216	41702	1.25	0.8	0.957	1.35114
136	CEP164_KAN630-11_4.tif:0013-0669	1.623	133.508	0	349	104.203	76.042	0.892	216.705	16822	1.281	0.78	0.955	0.545033
137	CEP164_KAN630-11_4.tif:0014-0727	1.868	179.055	0	909	18.414	82.604	0.911	334.462	25963	1.118	0.895	0.973	0.841201
138	CEP164_KAN630-11_4.tif:0015-0796	0.824	129.562	0	687	138.811	90.346	0.914	106.82	8292	1	1	1	0.268661
139	CEP164_KAN630-11_4.tif:0016-0858	2.087	168.222	0	814	50.815	97.417	0.9	351.067	27252	1.26	0.794	0.956	0.882965
140	CEP164_KAN630-11_4.tif:0017-1141	1.791	299.827	0	1714	84.551	129.581	0.972	536.881	41676	1.072	0.933	0.955	1.3503
										30676.3				0.993911
141	CEP164_KAN630-12_1.tif:0001-0068	2.28	153.062	0	960	14.586	7.663	0.897	349.006	27092	1.253	0.798	0.944	0.877781
142	CEP164_KAN630-12_1.tif:0002-0300	2.216	150.087	0	896	144.182	34.08	0.889	332.555	25815	1.124	0.89	0.98	0.836406
143	CEP164_KAN630-12_1.tif:0003-0349	2.37	217.141	0	1812	77.618	39.651	0.932	514.697	39954	1.255	0.797	0.958	1.29451
144	CEP164_KAN630-12_1.tif:0004-0404	2.035	270.152	0	2197	53.495	45.83	0.923	549.866	42684	1.127	0.887	0.952	1.38296
145	CEP164_KAN630-12_1.tif:0005-0447	1.868	217.097	0	1199	85.341	50.786	0.911	405.52	31479	1.146	0.873	0.97	1.01992
146	CEP164_KAN630-12_1.tif:0006-0457	2.01	236.231	0	1535	119.044	51.938	0.935	474.737	36852	1.14	0.877	0.94	1.194
147	CEP164_KAN630-12_1.tif:0007-0476	1.778	210.826	0	1376	14.706	54.048	0.89	374.796	29094	1.351	0.74	0.955	0.942646
148	CEP164_KAN630-12_1.tif:0008-0604	0.94	55.767	0	166	118.439	68.584	0.936	52.444	4071	1.052	0.951	0.954	0.1319
149	CEP164_KAN630-12_1.tif:0009-0639	2.422	198.612	0	1813	85.038	72.502	0.834	481.01	37339	1.32	0.758	0.9	1.20978
150	CEP164_KAN630-12_1.tif:0010-0651	1.881	247.096	0	1590	142.574	73.882	0.907	464.74	36076	1.324	0.755	0.957	1.16886
151	CEP164_KAN630-12_1.tif:0011-0716	2.177	174.692	0	1497	45.814	81.266	0.898	380.323	29523	1.265	0.791	0.921	0.956545
152	CEP164_KAN630-12_1.tif:0012-0790	2.499	207.088	0	1347	104.553	89.666	0.88	517.544	40175	1.272	0.786	0.93	1.30167
153	CEP164_KAN630-12_1.tif:0013-0866	1.907	122.486	0	353	74.723	98.255	0.92	233.529	18128	1.225	0.816	0.958	0.587347
154	CEP164_KAN630-12_1.tif:0014-0873	0.799	106.887	0	649	25.424	99.086	0.96	85.371	6627	1.081	0.925	0.984	0.214715
155	CEP164_KAN630-12_1.tif:0015-0895	2.19	235.176	0	2075	51.298	101.595	0.882	515.032	39980	1.23	0.813	0.916	1.29535
156	CEP164_KAN630-12_1.tif:0016-0931	0.889	180.145	0	1266	117.921	105.73	0.933	160.126	12430	1.172	0.853	0.979	0.402732
157	CEP164_KAN630-12_1.tif:0017-1066	1.443	200.259	0	836	21.39	121.051	0.967	288.936	22429	1.098	0.91	0.97	0.7267
158	CEP164_KAN630-12_1.tif:0018-1082	1.907	191.297	0	1237	41.684	122.76	0.874	364.722	28312	1.193	0.838	0.949	0.917309
159	CEP164_KAN630-12_1.tif:0019-1088	2.061	187.044	0	1441	67.501	123.46	0.889	385.527	29927	1.308	0.765	0.961	0.969635
160	CEP164_KAN630-12_1.tif:0020-1122	1.623	124.619	0	683	7.262	127.386	0.902	202.277	15702	1.112	0.899	0.977	0.508745
161	CEP164_KAN630-12_1.tif:0021-1193	2.087	187.123	0	1415	116.835	135.497	0.849	390.513	30314	1.228	0.814	0.928	0.982174
162	CEP164_KAN630-12_2.tif:0001-0046	2.654	120.932	0	830	19.725	5.23	0.86	320.923	24912	1.29	0.775	0.9	0.807149
163	CEP164_KAN630-12_2.tif:0002-0061	2.461	169.754	0	1818	106.366	6.923	0.84	417.681	32423	1.53	0.654	0.916	1.05051
164	CEP164_KAN630-12_2.tif:0003-0156	2.164	115.524	0	611	5.874	17.724	0.86	250.019	19408	1.603	0.624	0.96	0.628819
165	CEP164_KAN630-12_2.tif:0004-0230	1.404	92.275	0	217	129.041	26.134	0.913	129.57	10058	1.267	0.789	0.956	0.325879
166	CEP164_KAN630-12_2.tif:0005-0264	2.151	177.611	0	1198	53.768	30	0.905	382.1	29661	1.266	0.79	0.971	0.961016
167	CEP164_KAN630-12_2.tif:0006-0271	0.812	108.159	0	442	124.289	30.765	0.937	87.78	6814	1.039	0.963	0.992	0.220774
168	CEP164_KAN630-12_2.tif:0007-0344	2.048	138.277	0	795	24.736	39.066	0.883	283.229	21986	1.291	0.775	0.946	0.712346
169	CEP164_KAN630-12_2.tif:0008-0453	2.692	220.526	0	2462	90.404	51.441	0.847	593.743	46090	1.425	0.702	0.895	1.49332
170	CEP164_KAN630-12_2.tif:0009-0496	1.907	214.385	0	1454	123.091	56.276	0.92	408.741	31729	1.191	0.84	0.964	1.02802
171	CEP164_KAN630-12_2.tif:0010-0507	1.662	232.202	0	1277	24.876	57.662	0.864	385.875	29954	1.238	0.808	0.959	0.97051
172	CEP164_KAN630-12_2.tif:0011-0624	1.752	273.309	0	1861	122.277	70.879	0.926	478.833	37170	1.201	0.833	0.958	1.20431
173	CEP164_KAN630-12_2.tif:0012-0697	1.494	114.198	0	418	111.283	79.128	0.879	170.651	13247	1.282	0.78	0.935	0.429203
174	CEP164_KAN630-12_2.tif:0013-0753	2.048	150.314	0	688	52.667	85.478	0.906	307.886	23900	1.279	0.782	0.952	0.77436
175	CEP164_KAN630-12_2.tif:0014-0852	2.641	162.205	0	1539	106.858	96.749	0.797	428.361	33252	1.638	0.611	0.876	1.07736
176	CEP164_KAN630-12_2.tif:0015-0857	2.01	227.327	0	1274	29.221	97.307	0.935	456.843	35463	1.066	0.938	0.943	1.149
177	CEP164_KAN630-12_2.tif:0016-0918	1.842	99.406	0	377	64.068	104.232	0.889	183.121	14215	1.441	0.694	0.941	0.460566
178	CEP164_KAN630-12_2.tif:0017-0972	1.984	206.539	0	1567	16.253	110.304	0.89	409.746	31807	1.157	0.865	0.911	1.03055
179	CEP164_KAN630-12_2.tif:0018-1116	1.765	251.891	0	1464	127.7	126.68	0.958	444.554	34509	1.15	0.87	0.958	1.11809
180	CEP164_KAN630-12_2.tif:0019-1120	1.868	154.993	0	1286	35.421	127.181	0.806	289.516	22474	1.4	0.714	0.906	0.728158
181	CEP164_KAN630-12_2.tif:0020-1144	1.804	203.343	0	958	74.063	129.842	0.953	366.732	28468	1.098	0.911	0.959	0.922363
182	CEP164_KAN630-12_2.tif:0021-1241	1.585	167.74	0	964	99.243	140.885	0.87	265.787	20632	1.361	0.735	0.946	0.668477
183	CEP164_KAN630-12_3.tif:0001-0153	1.585	194.512	0	772	66.176	17.419	0.959	308.208	23925	1.102	0.907	0.972	0.77517
184	CEP164_KAN630-12_3.tif:0002-0187	2.023	170.828	0	875	31.373	21.191	0.872	345.502	26820	1.075	0.931	0.932	0.868968
185	CEP164_KAN630-12_3.tif:0003-0203	1.816	213.043	0	1382	95.397	23.073	0.934	386.97	30039	1.246	0.803	0.962	0.973264
186	CEP164_KAN630-12_3.tif:0004-0272	1.61	284.184	0	1801	112.831	30.931	0.895	457.616	35523	1.317	0.76	0.98	1.15095
187	CEP164_KAN630-12_3.tif:0005-0280	1.585	187.309	0	1012	36.728	31.785	0.932	296.794	23039	1.124	0.89	0.972	0.746464
188	CEP164_KAN630-12_3.tif:0006-0296	2.383	164.649	0	1384	83.257	33.539	0.866	392.393	30460	1.177	0.85	0.937	0.986904
189	CEP164_KAN630-12_3.tif:0007-0345	2.061	231.269	0	1658	25.041	39.17	0.889	476.682	37003	1.297	0.771	0.95	1.1989
190	CEP164_KAN630-12_3.tif:0008-0400	0.902	133.914	0	679	72.073	45.457	0.947	120.758	9374	1.146	0.873	0.986	0.303718
191	CEP164_KAN630-12_3.tif:0009-0416	1.649	244.188	0	1619	1.233	47.28	0.931	402.648	31256	1.203	0.831	0.966	1.01269
192	CEP164_KAN630-12_3.tif:0010-0459	2.1	207.025	0	1491	120.898	52.1	0.942	434.712	33745	1.119	0.893	0.934	1.09334
193	CEP164_KAN630-12_3.tif:0011-0578	2.01	156.045	0	962	141.04	65.58	0.889	313.593	24343	1.412	0.708	0.954	0.788713
194	CEP164_KAN630-12_3.tif:0012-0601	2.087	209.735	0	1453	70.24	68.265	0.891	437.7	33977	1.265	0.791	0.936	1.10085
195	CEP164_KAN630-12_3.tif:0013-0625	2.667	216.744	0	1828	110.239	70.968	0.879	577.975	44866	1.242	0.805	0.95	1.45366
196	CEP164_KAN630-12_3.tif:0014-0684	1.636	200.898	0	1339	13.354	77.701	0.913	328.678	25514	1.143	0.875	0.92	0.826654
197	CEP164_KAN630-12_3.tif:0015-0840	1.919	199.309	0	1149	32.506	95.334	0.926	382.564	29697	1.215	0.823	0.964	0.962183
198	CEP164_KAN630-12_3.tif:0016-0872	2.177	167.562	0	1202	67.229	98.99	0.865	364.8	28318	1.524	0.656	0.958	0.917503
199	CEP164_KAN630-12_3.tif:0017-0897	1.816	185.936	0	862	133.294	101.799	0.909	337.734	26217	1.305	0.766	0.962	0.849431
200	CEP164_KAN630-12_3.tif:0018-0976	2.126	137.182	0	1096	14.826	110.851	0.886	291.59	22635	1.279	0.782	0.935	0.733374
201	CEP164_KAN630-12_3.tif:0019-1054	0.812	127.952	0	760	143.685	119.635	0.937	103.844	8061	1.039	0.963	0.992	0.261176
202	CEP164_KAN630-12_3.tif:0020-1089	1.855	161.285	0	1063	121.339	123.608	0.943	299.19	23225	1.311	0.763	0.947	0.75249
203	CEP164_KAN630-12_3.tif:0021-1264	1.688	222.748	0	1381	141.833	143.514	0.927	375.904	29180	1.268	0.788	0.97	0.945432
204	CEP164_KAN630-12_3.tif:0022-1268	1.043	284.926	0	2124	106.747	143.975	0.899	297.309	23079	1	1	1	0.74776
205	CEP164_KAN630-12_4.tif:0001-0106	2.164	198.857	0	1567	130.83	12.058	0.889	430.37	33408	1.265	0.791	0.971	1.08242
206	CEP164_KAN630-12_4.tif:0002-0111	2.023	186.121	0	1511	125.983	12.615	0.851	376.432	29221	1.352	0.74	0.937	0.94676
207	CEP164_KAN630-12_4.tif:0003-0122	1.919	248.02	0	1551	91.9	13.909	0.902	476.064	36955	1.201	0.832	0.952	1.19734
208	CEP164_KAN630-12_4.tif:0004-0170	2.035	193.297	0	1564	30.017	19.385	0.9	393.437	30541	1.141	0.876	0.943	0.989528
209	CEP164_KAN630-12_4.tif:0005-0327	2.293	243.848	0	1734	124.367	37.127	0.924	559.154	43405	1.243	0.805	0.944	1.40632
210	CEP164_KAN630-12_4.tif:0006-0442	1.984	203.961	0	888	48.347	50.199	0.932	404.632	31410	1.207	0.829	0.969	1.01768
211	CEP164_KAN630-12_4.tif:0007-0499	0.799	115.952	3	486	43.584	56.637	0.96	92.611	7189	1.081	0.925	0.984	0.232924
212	CEP164_KAN630-12_4.tif:0008-0519	1.546	166.925	0	906	22.124	58.987	0.964	258.044	20031	1.117	0.895	0.968	0.649004
213	CEP164_KAN630-12_4.tif:0009-0555	2.01	173.936	0	1080	29.826	62.962	0.837	349.547	27134	1.403	0.713	0.918	0.879142
214	CEP164_KAN630-12_4.tif:0010-0580	2.164	159.113	0	892	142.079	65.794	0.902	344.355	26731	1.087	0.92	0.939	0.866084
215	CEP164_KAN630-12_4.tif:0011-0658	2.113	237.03	0	1856	88.763	74.721	0.911	500.772	38873	1.276	0.784	0.962	1.25949
216	CEP164_KAN630-12_4.tif:0012-0722	1.688	235.595	0	1357	57.925	81.977	0.927	397.585	30863	1.061	0.943	0.97	0.999961
217	CEP164_KAN630-12_4.tif:0013-0777	1.932	166.98	0	1043	13.774	88.225	0.885	322.662	25047	1.245	0.803	0.952	0.811523
218	CEP164_KAN630-12_4.tif:0014-0872	2.087	198.815	0	1446	117.491	98.959	0.913	414.912	32208	1.406	0.711	0.942	1.04354
219	CEP164_KAN630-12_4.tif:0015-0932	1.997	164.129	0	1067	111.719	105.767	0.892	327.724	25440	1.17	0.854	0.966	0.824256
220	CEP164_KAN630-12_4.tif:0016-1056	1.559	219.579	0	1313	40.879	119.892	0.944	342.269	26569	1.155	0.866	0.968	0.860836
221	CEP164_KAN630-12_4.tif:0017-1160	1.984	10.299	0	85	5.465	131.671	0.923	20.431	1586	1.15	0.87	0.945	0.0513864
222	CEP164_KAN630-12_4.tif:0018-1268	1.623	167.151	0	981	8.516	143.955	0.892	271.313	21061	1.185	0.844	0.944	0.682376
										27118.3				0.878633
223	CEP164_KAN630-13_1.tif:0001-0024	2.023	185.178	0	890	26.47	2.702	0.894	374.526	29073	1.404	0.712	0.963	0.941965
224	CEP164_KAN630-13_1.tif:0002-0244	1.366	95.83	0	269	18.149	27.677	0.916	130.858	10158	1.267	0.789	0.946	0.329119
225	CEP164_KAN630-13_1.tif:0003-0294	0.979	121.934	0	391	42.056	33.432	0.939	119.38	9267	1.155	0.866	0.974	0.300251
226	CEP164_KAN630-13_1.tif:0004-0321	2.473	211.068	0	1712	142.216	36.347	0.852	522.053	40525	1.529	0.654	0.934	1.31301
227	CEP164_KAN630-13_1.tif:0005-0410	2.448	179.258	0	1322	93.347	46.595	0.87	438.757	34059	1.441	0.694	0.945	1.10351
228	CEP164_KAN630-13_1.tif:0006-0479	1.739	163.481	0	629	107.857	54.401	0.904	284.311	22070	1.236	0.809	0.982	0.715068
229	CEP164_KAN630-13_1.tif:0007-0490	2.061	217.338	0	1265	103.573	55.604	0.934	447.967	34774	1.114	0.898	0.947	1.12668
230	CEP164_KAN630-13_1.tif:0008-0528	1.7	174.242	0	719	31.302	59.952	0.884	296.292	23000	1.165	0.859	0.971	0.7452
231	CEP164_KAN630-13_1.tif:0009-0588	1.069	100.373	0	328	53.301	66.71	0.94	107.322	8331	1.099	0.91	0.965	0.269924
232	CEP164_KAN630-13_1.tif:0010-0651	1.275	203.03	0	794	144.501	73.977	0.84	258.933	20100	1.608	0.622	0.98	0.65124
233	CEP164_KAN630-13_1.tif:0011-0685	2.345	201.566	0	1378	117.408	77.781	0.892	472.585	36685	1.586	0.631	0.948	1.18859
234	CEP164_KAN630-13_1.tif:0012-0724	2.409	134.187	0	646	94.488	82.217	0.917	323.254	25093	1.273	0.785	0.94	0.813013
235	CEP164_KAN630-13_1.tif:0013-0872	1.147	119.978	0	388	66.392	99.034	0.909	137.557	10678	1.115	0.897	0.994	0.345967
236	CEP164_KAN630-13_1.tif:0014-0906	1.623	207.405	0	1018	50.005	102.813	0.928	336.652	26133	1.093	0.915	0.981	0.846709
237	CEP164_KAN630-13_1.tif:0015-0979	1.224	146.632	0	543	115.208	111.121	0.926	179.45	13930	1.126	0.888	0.979	0.451332
238	CEP164_KAN630-13_1.tif:0016-1057	1.198	138.43	0	499	138.195	120.016	0.907	165.846	12874	1.289	0.776	0.974	0.417118
239	CEP164_KAN630-13_1.tif:0017-1109	2.087	196.957	0	966	82.339	125.89	0.923	411.034	31907	1.318	0.759	0.973	1.03379
240	CEP164_KAN630-13_1.tif:0018-1204	1.649	129.398	0	550	13.495	136.589	0.895	213.369	16563	1.366	0.732	0.934	0.536641
241	CEP164_KAN630-13_1.tif:0019-1216	1.997	138.181	0	743	138.356	138.035	0.905	275.912	21418	1.298	0.77	0.945	0.693943
242	CEP164_KAN630-13_2.tif:0001-0048	1.533	80.042	0	203	21.721	5.517	0.891	122.703	9525	1.434	0.697	0.93	0.30861
243	CEP164_KAN630-13_2.tif:0002-0176	2.151	150.737	0	855	125.088	19.995	0.887	324.285	25173	1.454	0.688	0.933	0.815605
244	CEP164_KAN630-13_2.tif:0003-0196	2.023	186.911	0	808	121.532	22.331	0.941	378.03	29345	1.143	0.875	0.952	0.950778
245	CEP164_KAN630-13_2.tif:0004-0199	1.829	196.507	0	865	68.536	22.594	0.941	359.466	27904	1.093	0.915	0.966	0.90409
246	CEP164_KAN630-13_2.tif:0005-0213	1.082	105.952	0	356	135.472	24.163	0.919	114.652	8900	1.103	0.906	0.966	0.28836
247	CEP164_KAN630-13_2.tif:0006-0228	1.713	237.15	0	1470	112.601	25.865	0.915	406.319	31541	1.191	0.84	0.974	1.02193
248	CEP164_KAN630-13_2.tif:0007-0321	2.048	196.057	0	1139	43.51	36.467	0.953	401.578	31173	1.111	0.9	0.952	1.01001
249	CEP164_KAN630-13_2.tif:0008-0332	2.242	178.408	0	1148	92.178	37.653	0.903	399.904	31043	1.358	0.736	0.943	1.00579
250	CEP164_KAN630-13_2.tif:0009-0450	0.799	106.581	5	324	32.234	51.075	0.96	85.126	6608	1.081	0.925	0.984	0.214099
251	CEP164_KAN630-13_2.tif:0010-0530	2.164	183.613	0	1221	35.998	60.178	0.872	397.379	30847	1.528	0.654	0.931	0.999443
252	CEP164_KAN630-13_2.tif:0011-0795	1.778	214.848	0	1098	23.398	90.312	0.939	381.946	29649	1.13	0.885	0.955	0.960628
253	CEP164_KAN630-13_2.tif:0012-0814	1.881	169.397	0	948	38.458	92.356	0.907	318.604	24732	1.208	0.828	0.948	0.801317
254	CEP164_KAN630-13_2.tif:0013-0817	1.804	162.507	0	647	123.499	92.768	0.927	293.084	22751	1.113	0.898	0.959	0.737132
255	CEP164_KAN630-13_2.tif:0014-0853	2.164	159.75	0	1171	70.768	96.789	0.86	345.734	26838	1.357	0.737	0.946	0.869551
256	CEP164_KAN630-13_2.tif:0015-1056	1.34	145.644	0	668	13.523	119.894	0.91	195.127	15147	1.166	0.857	0.977	0.490763
257	CEP164_KAN630-13_2.tif:0016-1066	1.198	99.548	0	280	47.331	120.989	0.907	119.264	9258	1.11	0.901	0.964	0.299959
258	CEP164_KAN630-13_2.tif:0017-1122	1.688	162.252	0	871	92.405	127.352	0.892	273.812	21255	1.124	0.89	0.932	0.688662
259	CEP164_KAN630-13_2.tif:0018-1166	1.237	204.062	0	981	0.847	132.402	0.906	252.363	19590	1.242	0.805	0.985	0.634716
260	CEP164_KAN630-13_3.tif:0001-0158	2.061	213.406	0	1345	97.385	18.005	0.911	439.864	34145	1.28	0.781	0.955	1.1063
261	CEP164_KAN630-13_3.tif:0002-0193	1.7	163.22	0	667	41.886	21.88	0.934	277.548	21545	1.028	0.973	0.964	0.698058
262	CEP164_KAN630-13_3.tif:0003-0213	2.048	200.327	0	1322	23.574	24.243	0.875	410.325	31852	1.491	0.671	0.949	1.032
263	CEP164_KAN630-13_3.tif:0004-0215	1.275	111.939	0	401	3.509	24.427	0.894	142.761	11082	1.167	0.857	0.952	0.359057
264	CEP164_KAN630-13_3.tif:0005-0276	1.958	134.026	0	742	128.168	31.353	0.866	262.437	20372	1.512	0.661	0.944	0.660053
265	CEP164_KAN630-13_3.tif:0006-0426	1.739	209.793	0	1091	121.902	48.346	0.955	364.851	28322	1.083	0.923	0.975	0.917633
266	CEP164_KAN630-13_3.tif:0007-0638	2.151	179.006	0	1033	82.584	72.401	0.905	385.102	29894	1.091	0.916	0.963	0.968566
267	CEP164_KAN630-13_3.tif:0008-0640	1.842	146.294	0	540	60.947	72.682	0.889	269.497	20920	1.423	0.703	0.947	0.677808
268	CEP164_KAN630-13_3.tif:0009-0758	2.267	175.21	0	1197	38.015	85.995	0.824	397.25	30837	1.329	0.752	0.891	0.999119
269	CEP164_KAN630-13_3.tif:0010-0857	1.855	227.958	0	1487	99.214	97.258	0.872	422.873	32826	1.304	0.767	0.935	1.06356
270	CEP164_KAN630-13_3.tif:0011-0893	2.319	148.244	0	745	50.548	101.467	0.862	343.75	26684	1.125	0.889	0.925	0.864562
271	CEP164_KAN630-13_3.tif:0012-0991	1.804	267.164	0	1767	119.61	112.459	0.903	481.835	37403	1.119	0.894	0.959	1.21186
272	CEP164_KAN630-13_3.tif:0013-1166	1.752	273.426	0	1573	100.912	132.387	0.926	479.039	37186	1.239	0.807	0.958	1.20483
273	CEP164_KAN630-13_3.tif:0014-1196	1.546	118.225	0	509	29.862	135.835	0.795	182.761	14187	1.362	0.734	0.892	0.459659
274	CEP164_KAN630-13_3.tif:0015-1199	1.675	249.738	0	1331	132.633	136.136	0.92	418.235	32466	1.269	0.788	0.967	1.0519
275	CEP164_KAN630-13_4.tif:0001-0051	2.641	189.912	0	1804	75.172	5.764	0.86	501.532	38932	1.514	0.661	0.983	1.2614
276	CEP164_KAN630-13_4.tif:0002-0075	2.306	195.648	0	1769	26.483	8.527	0.838	451.149	35021	1.38	0.725	0.913	1.13468
277	CEP164_KAN630-13_4.tif:0003-0078	0.902	149.571	0	811	95.34	8.91	0.947	134.877	10470	1.146	0.873	0.986	0.339228
278	CEP164_KAN630-13_4.tif:0004-0160	2.641	128.707	0	545	133.578	18.154	0.83	339.898	26385	1.822	0.549	0.907	0.854874
279	CEP164_KAN630-13_4.tif:0005-0172	2.847	238.679	0	1902	49.424	19.527	0.877	679.513	52748	1.334	0.75	0.923	1.70904
280	CEP164_KAN630-13_4.tif:0006-0310	2.564	159.749	0	1427	68.182	35.135	0.82	409.527	31790	1.49	0.671	0.905	1.03
281	CEP164_KAN630-13_4.tif:0007-0353	2.847	163.552	0	1282	116.247	40.178	0.848	465.629	36145	1.287	0.777	0.934	1.1711
282	CEP164_KAN630-13_4.tif:0008-0405	2.19	186.824	0	1328	15.114	46.023	0.903	409.14	31760	1.278	0.782	0.929	1.02902
283	CEP164_KAN630-13_4.tif:0009-0421	2.448	244.147	0	1681	92.344	47.828	0.87	597.582	46388	1.39	0.719	0.945	1.50297
284	CEP164_KAN630-13_4.tif:0010-0718	1.688	178.908	0	1161	3.602	81.493	0.877	301.921	23437	1.039	0.963	0.956	0.759359
285	CEP164_KAN630-13_4.tif:0011-0735	2.164	293.53	0	1693	32.406	83.491	0.902	635.262	49313	1.189	0.841	0.946	1.59774
286	CEP164_KAN630-13_4.tif:0012-0916	2.319	265.994	0	1382	81.324	103.981	0.871	616.789	47879	1.387	0.721	0.947	1.55128
287	CEP164_KAN630-13_4.tif:0013-0951	2.1	100.528	0	468	142.491	107.994	0.884	211.089	16386	1.458	0.686	0.973	0.530906
288	CEP164_KAN630-13_4.tif:0014-0984	2.138	203.235	0	952	61.252	111.692	0.904	434.609	33737	1.423	0.703	0.935	1.09308
289	CEP164_KAN630-13_4.tif:0015-1022	1.288	117.26	9	237	8.14	115.972	0.736	151.057	11726	1.668	0.599	0.862	0.379922
290	CEP164_KAN630-13_4.tif:0016-1097	1.623	157.937	0	873	28.167	124.562	0.881	256.357	19900	1.423	0.703	0.947	0.64476
291	CEP164_KAN630-13_4.tif:0017-1116	1.443	96.518	0	325	42.317	126.749	0.714	139.257	10810	1.938	0.516	0.858	0.350244
292	CEP164_KAN630-13_4.tif:0018-1205	2.254	113.966	0	609	131.782	136.806	0.794	256.924	19944	1.436	0.697	0.873	0.646186
										25434.4				0.824075
293	CEP164_KAN630-14_1.tif:0001-0056	2.177	157.213	0	1021	75.654	6.401	0.774	342.269	26569	1.217	0.821	0.878	0.860836
294	CEP164_KAN630-14_1.tif:0002-0054	1.919	193.329	0	999	107.195	6.187	0.926	371.086	28806	1.105	0.905	0.955	0.933314
295	CEP164_KAN630-14_1.tif:0003-0060	2.113	197.701	0	1411	143.297	6.936	0.925	417.681	32423	1.226	0.816	0.953	1.05051
296	CEP164_KAN630-14_1.tif:0004-0089	1.958	433.112	0	4156	42.992	10.149	0.944	848.077	65833	1.094	0.914	0.962	2.13299
297	CEP164_KAN630-14_1.tif:0005-0130	1.752	235.765	0	1542	31.586	14.765	0.951	413.057	32064	1.144	0.874	0.954	1.03887
298	CEP164_KAN630-14_1.tif:0006-0128	0.915	69.577	0	168	112.986	14.582	0.982	63.638	4940	1.169	0.855	0.947	0.160056
299	CEP164_KAN630-14_1.tif:0007-0178	2.37	190.587	0	1532	94.729	20.096	0.835	451.755	35068	1.479	0.676	0.909	1.1362
300	CEP164_KAN630-14_1.tif:0008-0181	2.254	232.394	0	1675	19.642	20.53	0.917	523.908	40669	1.107	0.904	0.956	1.31768
301	CEP164_KAN630-14_1.tif:0009-0190	1.881	195.692	0	1268	2.169	21.562	0.884	368.059	28571	1.283	0.779	0.945	0.9257
302	CEP164_KAN630-14_1.tif:0010-0255	2.203	266.62	0	1882	94.835	28.966	0.896	587.328	45592	1.234	0.81	0.945	1.47718
303	CEP164_KAN630-14_1.tif:0011-0450	1.481	238.878	0	1349	144.519	51.038	0.792	353.888	27471	2.019	0.495	0.954	0.89006
304	CEP164_KAN630-14_1.tif:0012-0451	1.971	160.477	0	617	72.856	51.258	0.89	316.298	24553	1.096	0.912	0.994	0.795517
305	CEP164_KAN630-14_1.tif:0013-0561	1.713	128.248	0	336	103.169	63.654	0.915	219.733	17057	1.085	0.922	0.967	0.552647
306	CEP164_KAN630-14_1.tif:0014-0589	1.224	208.505	0	1509	90.01	66.837	0.957	255.172	19808	1.073	0.932	0.979	0.641779
307	CEP164_KAN630-14_1.tif:0015-0641	2.113	211.878	0	1818	136.106	72.796	0.902	447.632	34748	1.22	0.819	0.934	1.12584
308	CEP164_KAN630-14_1.tif:0016-0683	1.997	226.432	0	1008	83.312	77.508	0.915	452.128	35097	1.207	0.828	0.972	1.13714
309	CEP164_KAN630-14_1.tif:0017-0695	2.126	219.642	0	1393	22.42	78.823	0.886	466.866	36241	1.223	0.817	0.943	1.17421
310	CEP164_KAN630-14_1.tif:0018-0846	1.816	202.149	0	1461	36.345	95.977	0.841	367.183	28503	1.229	0.814	0.959	0.923497
311	CEP164_KAN630-14_1.tif:0019-0853	1.997	216.781	0	1309	86.164	96.795	0.963	432.857	33601	1.161	0.861	0.975	1.08867
312	CEP164_KAN630-14_1.tif:0020-0870	1.907	217.297	0	1199	121.305	98.798	0.969	414.293	32160	1.019	0.981	0.958	1.04198
313	CEP164_KAN630-14_1.tif:0021-0948	1.636	149.654	0	549	51.63	107.614	0.924	244.84	19006	1.259	0.794	0.962	0.615794
314	CEP164_KAN630-14_1.tif:0022-0970	2.126	188.624	0	1272	136.065	110.087	0.898	400.934	31123	1.475	0.678	0.927	1.00839
315	CEP164_KAN630-14_1.tif:0023-1053	1.971	174.386	0	1120	31.294	119.623	0.842	343.711	26681	1.33	0.752	0.903	0.864464
316	CEP164_KAN630-14_1.tif:0024-1193	1.713	221.098	0	1321	51.106	135.415	0.957	378.816	29406	1.147	0.872	0.943	0.952754
317	CEP164_KAN630-14_1.tif:0025-1235	1.366	269.774	0	1560	74.066	140.161	0.873	368.381	28596	1.329	0.752	0.991	0.92651
318	CEP164_KAN630-14_2.tif:0001-0050	2.023	207.898	0	1369	33.882	5.712	0.991	420.477	32640	1.095	0.913	0.957	1.05754
319	CEP164_KAN630-14_2.tif:0002-0080	0.799	106.806	0	543	38.477	9.08	0.96	85.306	6622	1.081	0.925	0.984	0.214553
320	CEP164_KAN630-14_2.tif:0003-0118	1.958	220.98	0	1275	106.655	13.47	0.92	432.702	33589	1.084	0.922	0.962	1.08828
321	CEP164_KAN630-14_2.tif:0004-0155	2.164	169.262	0	677	42.93	17.555	0.924	366.32	28436	1.163	0.86	0.952	0.921326
322	CEP164_KAN630-14_2.tif:0005-0216	2.28	268.859	0	2119	16.567	24.574	0.897	613.041	47588	1.298	0.771	0.941	1.54185
323	CEP164_KAN630-14_2.tif:0006-0250	2.035	212.291	0	1484	85.948	28.409	0.857	432.096	33542	1.263	0.792	0.94	1.08676
324	CEP164_KAN630-14_2.tif:0007-0461	2.512	199.846	0	1576	143.513	52.387	0.873	502.021	38970	1.338	0.747	0.965	1.26263
325	CEP164_KAN630-14_2.tif:0008-0570	2.409	242.182	0	2000	108.642	64.708	0.896	583.411	45288	1.385	0.722	0.944	1.46733
326	CEP164_KAN630-14_2.tif:0009-0652	1.752	174.743	0	925	68.42	74.05	0.926	306.147	23765	1.057	0.946	0.958	0.769986
327	CEP164_KAN630-14_2.tif:0010-0719	1.868	209.662	0	1322	32.444	81.632	0.925	391.633	30401	1.181	0.847	0.945	0.984992
328	CEP164_KAN630-14_2.tif:0011-0803	2.19	242.382	0	1667	118.672	91.185	0.913	530.813	41205	1.274	0.785	0.95	1.33504
329	CEP164_KAN630-14_2.tif:0012-0843	1.585	143.033	0	476	44.173	95.711	0.932	226.637	17593	1.146	0.872	0.976	0.570013
330	CEP164_KAN630-14_2.tif:0013-0970	1.778	189.935	0	987	132.974	110.074	0.914	337.657	26211	1.337	0.748	0.962	0.849236
331	CEP164_KAN630-14_2.tif:0014-1051	0.812	98.365	0	267	141.314	119.295	0.937	79.831	6197	1.039	0.963	0.992	0.200783
332	CEP164_KAN630-14_2.tif:0015-1131	1.533	152.076	0	623	1.062	128.414	0.902	233.13	18097	1.304	0.767	0.971	0.586343
333	CEP164_KAN630-14_2.tif:0016-1181	1.907	180.912	0	989	51.477	134.129	0.944	344.922	26775	1.074	0.932	0.949	0.86751
334	CEP164_KAN630-14_2.tif:0017-1252	1.829	119.092	0	451	135.435	142.089	0.916	217.852	16911	1.12	0.893	0.966	0.547916
335	CEP164_KAN630-14_3.tif:0001-0078	2.525	220.923	0	1339	53.233	8.942	0.918	557.814	43301	1.318	0.759	0.963	1.40295
336	CEP164_KAN630-14_3.tif:0002-0091	2.744	121.164	0	622	97.39	10.455	0.897	332.465	25808	1.372	0.729	0.947	0.836179
337	CEP164_KAN630-14_3.tif:0003-0107	2.216	150.773	0	1130	65.879	12.224	0.914	334.075	25933	1.203	0.831	0.942	0.840229
338	CEP164_KAN630-14_3.tif:0004-0144	1.559	211.388	0	1165	123.069	16.329	0.917	329.502	25578	1.128	0.887	0.964	0.828727
339	CEP164_KAN630-14_3.tif:0005-0229	1.288	111.23	0	305	14.25	25.988	0.932	143.289	11123	1.189	0.841	0.957	0.360385
340	CEP164_KAN630-14_3.tif:0006-0253	2.628	164.358	0	1484	84.384	28.756	0.793	431.929	33529	1.566	0.639	0.877	1.08634
341	CEP164_KAN630-14_3.tif:0007-0353	1.572	376.098	0	3477	105.765	40.131	0.98	591.089	45884	1.091	0.917	0.968	1.48664
342	CEP164_KAN630-14_3.tif:0008-0448	0.902	149.157	0	700	71.221	50.848	0.947	134.504	10441	1.146	0.873	0.986	0.338288
343	CEP164_KAN630-14_3.tif:0009-0471	2.435	151.317	0	1251	53.898	53.492	0.839	368.42	28599	1.528	0.654	0.92	0.926608
344	CEP164_KAN630-14_3.tif:0010-0681	2.048	89.396	0	317	135.456	77.322	0.787	183.108	14214	1.702	0.588	0.891	0.460534
345	CEP164_KAN630-14_3.tif:0011-0802	1.211	33.819	0	130	32.244	91.026	0.764	40.953	3179	2.024	0.494	0.926	0.103
346	CEP164_KAN630-14_3.tif:0012-0856	2.448	147.311	0	1044	78.496	97.232	0.89	360.561	27989	1.421	0.704	0.938	0.906844
347	CEP164_KAN630-14_3.tif:0013-0948	2.448	155.768	0	778	123.39	107.589	0.89	381.263	29596	1.191	0.84	0.936	0.95891
348	CEP164_KAN630-14_3.tif:0014-0987	1.945	90.689	0	382	37.555	112.064	0.851	176.41	13694	1.557	0.642	0.907	0.443686
349	CEP164_KAN630-14_3.tif:0015-1036	1.623	77.159	0	289	10.964	117.646	0.763	125.241	9722	1.735	0.576	0.872	0.314993
350	CEP164_KAN630-14_3.tif:0016-1120	2.667	146.237	0	1253	87.258	127.181	0.801	389.959	30271	1.428	0.701	0.918	0.98078
351	CEP164_KAN630-14_3.tif:0017-1170	2.461	137.497	0	1060	75.58	132.877	0.755	338.314	26262	1.604	0.623	0.886	0.850889
352	CEP164_KAN630-14_3.tif:0018-1225	2.023	161.58	0	1029	120.316	139.036	0.894	326.797	25368	1.114	0.898	0.946	0.821923
353	CEP164_KAN630-14_4.tif:0001-0027	2.216	144.326	0	834	23.665	3.035	0.892	319.789	24824	1.4	0.714	0.932	0.804298
354	CEP164_KAN630-14_4.tif:0002-0152	2.306	132.615	0	863	38.278	17.197	0.82	305.799	23738	1.397	0.716	0.923	0.769111
355	CEP164_KAN630-14_4.tif:0003-0159	2.654	212.146	0	2160	83.731	18.098	0.867	562.98	43702	1.374	0.728	0.943	1.41594
356	CEP164_KAN630-14_4.tif:0004-0166	2.164	231.036	0	1113	108.29	18.876	0.911	500.012	38814	1.178	0.849	0.971	1.25757
357	CEP164_KAN630-14_4.tif:0005-0215	3.027	198.153	0	2261	43.825	24.508	0.842	599.875	46566	1.332	0.751	0.936	1.50874
358	CEP164_KAN630-14_4.tif:0006-0309	0.799	117.113	0	604	115.884	35.072	0.96	93.538	7261	1.081	0.925	0.984	0.235256
359	CEP164_KAN630-14_4.tif:0007-0331	1.481	124.757	0	302	72.068	37.565	0.935	184.822	14347	1.208	0.828	0.979	0.464843
360	CEP164_KAN630-14_4.tif:0008-0362	2.499	122.526	0	478	55.06	41.062	0.783	306.211	23770	1.825	0.548	0.917	0.770148
361	CEP164_KAN630-14_4.tif:0009-0449	2.254	182.171	0	1013	127.727	50.979	0.953	410.686	31880	1.072	0.933	0.949	1.03291
362	CEP164_KAN630-14_4.tif:0010-0466	1.585	282.593	0	1623	14.205	52.893	0.906	447.774	34759	1.121	0.892	0.972	1.12619
363	CEP164_KAN630-14_4.tif:0011-0527	2.332	216.337	0	1737	96.47	59.803	0.93	504.43	39157	1.341	0.746	0.948	1.26869
364	CEP164_KAN630-14_4.tif:0012-0543	2.126	122.255	0	868	43.076	61.608	0.856	259.861	20172	1.419	0.705	0.909	0.653573
365	CEP164_KAN630-14_4.tif:0013-0557	2.035	181.456	0	1481	52.854	63.229	0.891	369.334	28670	1.373	0.729	0.938	0.928908
366	CEP164_KAN630-14_4.tif:0014-0607	1.816	246.61	0	1564	25.381	68.996	0.886	447.942	34772	1.155	0.865	0.969	1.12661
367	CEP164_KAN630-14_4.tif:0015-0745	2.126	138.733	0	482	120.879	84.538	0.865	294.888	22891	1.538	0.65	0.954	0.741668
368	CEP164_KAN630-14_4.tif:0016-0865	1.224	80.526	0	725	9.93	98.178	0.914	98.549	7650	1.376	0.727	0.945	0.24786
369	CEP164_KAN630-14_4.tif:0017-0865	1.52	124.076	0	479	29.334	98.145	0.92	188.609	14641	1.166	0.858	0.959	0.474368
370	CEP164_KAN630-14_4.tif:0018-0883	2.525	163.949	0	1575	54.08	100.269	0.843	413.958	32134	1.566	0.639	0.907	1.04114
371	CEP164_KAN630-14_4.tif:0019-1010	2.242	184.299	0	1439	36.494	114.668	0.947	413.108	32068	1.202	0.832	0.93	1.039
372	CEP164_KAN630-14_4.tif:0020-1032	1.546	211.475	0	1281	137.214	117.206	0.909	326.913	25377	1.331	0.752	0.964	0.822215
373	CEP164_KAN630-14_4.tif:0021-1049	2.126	203.109	0	1314	66.145	119.146	0.895	431.723	33513	1.497	0.668	0.976	1.08582
374	CEP164_KAN630-14_4.tif:0022-1129	2.345	180.335	0	1495	116.028	128.214	0.808	422.808	32821	1.528	0.655	0.901	1.0634
										26720.8				0.865753
375	CEP164_KAN630-15_1.tif:0001-0078	2.126	218.739	0	1880	78.181	8.965	0.886	464.946	36092	1.239	0.807	0.938	1.16938
376	CEP164_KAN630-15_1.tif:0002-0214	2.048	214.088	0	1895	27.988	24.344	0.853	438.512	34040	1.269	0.788	0.914	1.1029
377	CEP164_KAN630-15_1.tif:0003-0292	2.023	227.656	0	1755	127.828	33.16	0.904	460.437	35742	1.222	0.818	0.969	1.15804
378	CEP164_KAN630-15_1.tif:0004-0312	1.894	202.735	0	1687	93.033	35.398	0.855	383.917	29802	1.329	0.753	0.977	0.965585
379	CEP164_KAN630-15_1.tif:0005-0351	2.409	161.086	0	1178	41.47	39.92	0.917	388.052	30123	1.041	0.96	0.933	0.975985
380	CEP164_KAN630-15_1.tif:0006-0487	1.675	95.477	0	305	126.525	55.291	0.895	159.895	12412	1.415	0.707	0.974	0.402149
381	CEP164_KAN630-15_1.tif:0007-0592	2.203	170.795	0	1653	54.215	67.215	0.918	376.239	29206	1.363	0.734	0.958	0.946274
382	CEP164_KAN630-15_1.tif:0008-0679	1.739	94.481	0	305	81.251	77.12	0.894	164.313	12755	1.326	0.754	0.951	0.413262
383	CEP164_KAN630-15_1.tif:0009-0836	2.01	215.526	0	2094	111.114	94.933	0.911	433.127	33622	1.246	0.803	0.94	1.08935
384	CEP164_KAN630-15_1.tif:0010-0864	1.675	189.908	0	1094	11.711	98.158	0.92	318.037	24688	1.254	0.798	0.97	0.799891
385	CEP164_KAN630-15_1.tif:0011-1060	2.074	154.739	0	1374	15.321	120.327	0.954	320.936	24913	1.027	0.973	0.939	0.807181
386	CEP164_KAN630-15_1.tif:0012-1073	1.791	109.583	0	319	72.229	121.783	0.946	196.222	15232	1.2	0.833	0.962	0.493517
387	CEP164_KAN630-15_1.tif:0013-1146	1.958	168.171	0	1026	134.058	130.078	0.845	329.296	25562	1.46	0.685	0.935	0.828209
388	CEP164_KAN630-15_1.tif:0014-1179	1.778	199.71	0	1626	68.385	133.821	0.939	355.035	27560	1.106	0.905	0.952	0.892944
389	CEP164_KAN630-15_2.tif:0001-0235	2.692	182.646	0	1432	34.93	26.61	0.891	491.754	38173	1.236	0.809	0.909	1.23681
390	CEP164_KAN630-15_2.tif:0002-0300	2.216	120.238	0	501	12.207	34.074	0.923	266.418	20681	1.161	0.861	0.956	0.670064
391	CEP164_KAN630-15_2.tif:0003-0373	3.246	192.94	0	2099	97.548	42.403	0.829	626.348	48621	1.364	0.733	0.923	1.57532
392	CEP164_KAN630-15_2.tif:0004-0405	1.752	250.449	0	1879	142.905	45.962	0.901	438.782	34061	1.101	0.908	0.944	1.10358
393	CEP164_KAN630-15_2.tif:0005-0512	0.812	109.825	1	472	106.583	58.118	0.937	89.132	6919	1.039	0.963	0.992	0.224176
394	CEP164_KAN630-15_2.tif:0006-0521	2.731	163.693	0	1614	85.899	59.137	0.882	447.053	34703	1.552	0.644	0.975	1.12438
395	CEP164_KAN630-15_2.tif:0007-0560	0.902	107.229	0	397	70.529	63.549	0.911	96.694	7506	1.149	0.87	0.986	0.243194
396	CEP164_KAN630-15_2.tif:0008-0603	2.795	150.691	0	1565	58.591	68.529	0.665	421.25	32700	2.278	0.439	0.835	1.05948
397	CEP164_KAN630-15_2.tif:0009-0700	2.525	194.923	0	1697	27.001	79.476	0.918	492.166	38205	1.24	0.807	0.954	1.23784
398	CEP164_KAN630-15_2.tif:0010-0712	2.525	124.474	0	1189	6.58	80.835	0.784	314.288	24397	1.583	0.632	0.867	0.790463
399	CEP164_KAN630-15_2.tif:0011-0841	2.164	214.952	0	1444	71.676	95.457	0.924	465.204	36112	1.168	0.856	0.949	1.17003
400	CEP164_KAN630-15_2.tif:0012-0965	3.221	184.592	0	1950	128.734	109.516	0.78	594.49	46148	1.89	0.529	0.911	1.4952
401	CEP164_KAN630-15_2.tif:0013-1176	1.662	164.729	0	866	8.816	133.517	0.913	273.748	21250	1.251	0.799	0.959	0.6885
402	CEP164_KAN630-15_2.tif:0014-1195	2.126	181.352	0	1418	64.767	135.726	0.886	385.476	29923	1.28	0.781	0.94	0.969505
403	CEP164_KAN630-15_3.tif:0001-0071	2.692	177.402	0	1502	67.416	8.074	0.833	477.635	37077	1.61	0.621	0.968	1.20129
404	CEP164_KAN630-15_3.tif:0002-0104	2.448	192.905	0	1843	108.742	11.769	0.851	472.16	36652	1.546	0.647	0.952	1.18752
405	CEP164_KAN630-15_3.tif:0003-0356	2.718	174.592	0	1924	115.747	40.378	0.787	474.569	36839	1.77	0.565	0.896	1.19358
406	CEP164_KAN630-15_3.tif:0004-0426	2.499	123.675	0	1083	29.728	48.319	0.853	309.084	23993	1.52	0.658	0.917	0.777373
407	CEP164_KAN630-15_3.tif:0005-0628	1.945	224.762	0	2206	130.128	71.372	0.914	437.211	33939	1.363	0.734	0.971	1.09962
408	CEP164_KAN630-15_3.tif:0006-0643	0.915	147.423	0	738	71.909	72.975	0.924	134.839	10467	1.13	0.885	0.993	0.339131
409	CEP164_KAN630-15_3.tif:0007-0648	2.667	184.594	0	1949	82.6	73.626	0.818	492.244	38211	1.656	0.604	0.932	1.23804
410	CEP164_KAN630-15_3.tif:0008-0661	0.812	175.54	0	1027	32.808	75.017	0.937	142.465	11059	1.039	0.963	0.992	0.358312
411	CEP164_KAN630-15_3.tif:0009-0734	2.538	129.396	0	717	138.658	83.393	0.902	328.381	25491	1.298	0.77	0.961	0.825908
412	CEP164_KAN630-15_3.tif:0010-0739	1.481	277.983	0	2363	52.617	83.934	0.964	411.82	31968	1.082	0.924	0.979	1.03576
413	CEP164_KAN630-15_3.tif:0011-0769	0.902	115.671	3	233	50.178	87.327	0.911	104.308	8097	1.149	0.87	0.986	0.262343
414	CEP164_KAN630-15_3.tif:0012-0814	2.151	247.581	0	1743	54.336	92.406	0.919	532.63	41346	1.365	0.732	0.952	1.33961
415	CEP164_KAN630-15_3.tif:0013-0822	1.121	242.874	0	1804	33.44	93.281	0.919	272.202	21130	1.137	0.88	0.989	0.684612
416	CEP164_KAN630-15_3.tif:0014-0913	2.68	167.899	0	1476	140.924	103.622	0.915	449.887	34923	1.308	0.765	0.945	1.13151
417	CEP164_KAN630-15_3.tif:0015-1001	2.023	222.854	0	1282	34.958	113.665	0.941	450.724	34988	1.198	0.835	0.949	1.13361
418	CEP164_KAN630-15_3.tif:0016-1017	1.919	180.671	0	1012	7.027	115.44	0.95	346.79	26920	1.273	0.786	0.968	0.872208
419	CEP164_KAN630-15_3.tif:0017-1140	1.984	173.747	0	1401	87.399	129.468	0.877	344.69	26757	1.311	0.763	0.945	0.866927
420	CEP164_KAN630-15_3.tif:0018-1139	2.641	163.746	0	1414	116.637	129.291	0.871	432.431	33568	1.435	0.697	0.958	1.0876
421	CEP164_KAN630-15_4.tif:0001-0047	2.435	211.212	0	1971	99.004	5.373	0.858	514.247	39919	1.406	0.711	0.917	1.29338
422	CEP164_KAN630-15_4.tif:0002-0063	2.448	130.632	0	896	49.337	7.155	0.89	319.737	24820	1.397	0.716	0.943	0.804168
423	CEP164_KAN630-15_4.tif:0003-0130	1.469	275.588	0	2177	129.808	14.791	0.927	404.722	31417	1.14	0.877	0.983	1.01791
424	CEP164_KAN630-15_4.tif:0004-0154	1.932	146.58	0	679	12.524	17.487	0.957	283.242	21987	1.18	0.847	0.962	0.712379
425	CEP164_KAN630-15_4.tif:0005-0171	2.37	210.163	0	2199	70.191	19.434	0.843	498.157	38670	1.471	0.68	0.925	1.25291
426	CEP164_KAN630-15_4.tif:0006-0186	2.035	191.013	0	1560	1.34	21.082	0.887	388.786	30180	1.184	0.845	0.972	0.977832
427	CEP164_KAN630-15_4.tif:0007-0250	2.332	283.249	0	2597	44.457	28.437	0.896	660.447	51268	1.303	0.767	0.958	1.66108
428	CEP164_KAN630-15_4.tif:0008-0273	1.829	212.683	0	1183	89.172	30.982	0.966	389.057	30201	1.074	0.931	0.963	0.978512
429	CEP164_KAN630-15_4.tif:0009-0328	2.254	216.04	0	1898	69.846	37.297	0.878	487.039	37807	1.348	0.742	0.919	1.22495
430	CEP164_KAN630-15_4.tif:0010-0373	2.164	154.405	0	834	22.415	42.377	0.947	334.166	25940	1.151	0.869	0.946	0.840456
431	CEP164_KAN630-15_4.tif:0011-0429	2.28	173.237	0	1614	143.367	48.768	0.941	395.008	30663	1.136	0.88	0.941	0.993481
432	CEP164_KAN630-15_4.tif:0012-0581	2.37	241.62	0	1973	82.636	66.022	0.87	572.719	44458	1.186	0.843	0.939	1.44044
433	CEP164_KAN630-15_4.tif:0013-0625	1.881	266.781	0	1428	16.533	70.983	0.956	501.764	38950	1.081	0.925	0.945	1.26198
434	CEP164_KAN630-15_4.tif:0014-0634	2.28	186.09	0	1993	111.509	72.06	0.864	424.316	32938	1.225	0.816	0.959	1.06719
435	CEP164_KAN630-15_4.tif:0015-0779	2.551	267.838	0	1406	84.097	88.394	0.927	683.172	53032	1.182	0.846	0.957	1.71824
436	CEP164_KAN630-15_4.tif:0016-0780	2.048	142.44	0	500	124.688	88.51	0.953	291.757	22648	1.189	0.841	0.955	0.733795
437	CEP164_KAN630-15_4.tif:0017-0785	1.816	245.589	0	1694	34.455	89.108	0.909	446.087	34628	1.145	0.873	0.956	1.12195
438	CEP164_KAN630-15_4.tif:0018-0834	1.262	54.071	0	164	8.14	94.745	0.873	68.263	5299	1.54	0.649	0.933	0.171688
439	CEP164_KAN630-15_4.tif:0019-0872	2.074	214.832	0	2081	127.562	98.964	0.886	445.571	34588	1.139	0.878	0.923	1.12065
440	CEP164_KAN630-15_4.tif:0020-0896	2.048	212.006	0	1798	37.364	101.669	0.883	434.248	33709	1.464	0.683	0.958	1.09217
441	CEP164_KAN630-15_4.tif:0021-0941	1.984	291.136	0	2106	71.167	106.812	0.947	577.576	44835	1.097	0.911	0.945	1.45265
442	CEP164_KAN630-15_4.tif:0022-0964	1.572	194.016	0	1077	1.314	109.431	0.951	304.923	23670	1.091	0.917	0.968	0.766908
443	CEP164_KAN630-15_4.tif:0023-1018	2.035	182.918	0	1529	39.551	115.544	0.913	372.31	28901	1.233	0.811	0.935	0.936392
444	CEP164_KAN630-15_4.tif:0024-1136	0.799	108.242	0	248	132.682	128.936	0.96	86.453	6711	1.081	0.925	0.984	0.217436
445	CEP164_KAN630-15_4.tif:0025-1158	2.332	148.602	0	1430	97.682	131.497	0.896	346.494	26897	1.468	0.681	0.955	0.871463
446	CEP164_KAN630-15_4.tif:0026-1192	2.087	157.29	0	1007	54.235	135.375	0.946	328.253	25481	1.26	0.794	0.967	0.825584
447	CEP164_KAN630-16_1.tif:0001-0062	2.023	148.828	0	541	114.826	7.058	0.904	301.007	23366	1.106	0.904	0.972	0.757058
										28396				0.920031
448	CEP164_KAN630-16_1.tif:0002-0115	2.692	186.847	0	1432	85.343	13.109	0.891	503.065	39051	1.471	0.68	0.939	1.26525
449	CEP164_KAN630-16_1.tif:0003-0255	2.873	176.96	0	1569	135.74	29.032	0.832	508.359	39462	1.294	0.773	0.905	1.27857
450	CEP164_KAN630-16_1.tif:0004-0304	1.997	273.703	0	2180	113.526		0.883	546.517	42424	1.315	0.761	0.945	1.37454
451	CEP164_KAN630-16_1.tif:0005-0322	2.229	245.162	0	1799	41.61	36.619	0.907	546.375	42413	1.235	0.81	0.958	1.37418
452	CEP164_KAN630-16_1.tif:0006-0410	1.945	375.179	0	2663	79.165	46.629	0.938	729.805	56652	1.081	0.925	0.956	1.83552
453	CEP164_KAN630-16_1.tif:0007-0491	1.662	183.085	0	1057	1.454	55.748	0.913	304.253	23618	1.137	0.88	0.952	0.765223
454	CEP164_KAN630-16_1.tif:0008-0591	1.559	212.653	0	1121	32.522	67.073	0.917	331.473	25731	1.192	0.839	0.964	0.833684
455	CEP164_KAN630-16_1.tif:0009-0656	2.319	234.433	0	1915	117.985	74.432	0.912	543.605	42198	1.273	0.785	0.945	1.36722
456	CEP164_KAN630-16_1.tif:0010-0659	2.242	232.81	0	1708	72.181	74.813	0.903	521.847	40509	1.276	0.784	0.938	1.31249
457	CEP164_KAN630-16_1.tif:0011-0881	2.074	179.453	0	1272	107.718	100.001	0.931	372.194	28892	1.181	0.847	0.936	0.936101
458	CEP164_KAN630-16_1.tif:0012-0893	2.345	178.863	0	1200	39.071	101.392	0.86	419.356	32553	1.138	0.879	0.943	1.05472
459	CEP164_KAN630-16_1.tif:0013-0950	1.121	87.483	0	207	10.571	107.815	0.938	98.047	7611	1.331	0.752	0.946	0.246596
460	CEP164_KAN630-16_1.tif:0014-0964	1.984	163.253	0	1239	29.803	109.446	0.877	323.873	25141	1.366	0.732	0.936	0.814568
461	CEP164_KAN630-16_1.tif:0015-1001	2.1	222.227	0	1677	89.441	113.622	0.863	466.634	36223	1.296	0.772	0.964	1.17363
462	CEP164_KAN630-16_1.tif:0016-1003	1.971	158.843	0	695	55.814	113.901	0.951	313.077	24303	1.059	0.945	0.965	0.787417
463	CEP164_KAN630-16_1.tif:0017-1054	1.932	151.273	0	1019	9.472	119.581	0.833	292.311	22691	1.327	0.753	0.915	0.735188
464	CEP164_KAN630-16_1.tif:0018-1127	1.894	189.415	0	971	137.481	127.931	0.913	358.693	27844	1.042	0.96	0.942	0.902146
465	CEP164_KAN630-16_2.tif:0001-0041	1.971	231.124	0	1567	58.914	4.638	0.926	455.542	35362	1.159	0.863	0.965	1.14573
466	CEP164_KAN630-16_2.tif:0002-0333	2.01	221.878	0	1603	127.831	37.832	0.935	445.893	34613	1.255	0.797	0.951	1.12146
467	CEP164_KAN630-16_2.tif:0003-0334	2.035	261.025	0	1771	66.617	37.916	0.933	531.29	41242	1.206	0.829	0.972	1.33624
468	CEP164_KAN630-16_2.tif:0004-0348	1.842	256.811	0	1306	26.586	39.554	0.947	473.088	36724	1.144	0.874	0.973	1.18986
469	CEP164_KAN630-16_2.tif:0005-0461	2.332	196.11	0	749	69.919	52.378	0.939	457.268	35496	1.138	0.878	0.95	1.15007
470	CEP164_KAN630-16_2.tif:0006-0555	1.791	232.496	0	1586	127.567	63.079	0.946	416.316	32317	1.139	0.878	0.955	1.04707
471	CEP164_KAN630-16_2.tif:0007-0666	2.035	252.544	0	1801	76.625	75.638	0.947	514.028	39902	1.144	0.874	0.949	1.29282
472	CEP164_KAN630-16_2.tif:0008-0730	1.585	246.333	0	1690	10.623	82.86	0.932	390.319	30299	1.124	0.89	0.972	0.981688
473	CEP164_KAN630-16_2.tif:0009-0759	2.383	201.465	0	1765	34.902	86.143	0.847	480.134	37271	1.368	0.731	0.927	1.20758
474	CEP164_KAN630-16_2.tif:0010-0794	1.301	31.376	0	132	124.008	90.181	0.929	40.824	3169	1.186	0.843	0.935	0.102676
475	CEP164_KAN630-16_2.tif:0011-0870	0.824	105.375	0	392	37.115	98.745	0.914	86.878	6744	1	1	1	0.218506
476	CEP164_KAN630-16_2.tif:0012-0962	2.048	247.333	0	1923	136.573	109.201	0.953	506.607	39326	1.193	0.838	0.961	1.27416
477	CEP164_KAN630-16_2.tif:0013-0967	2.035	192.835	0	1295	26.514	109.84	0.9	392.496	30468	1.11	0.901	0.96	0.987163
478	CEP164_KAN630-16_2.tif:0014-1031	1.765	221.482	0	1737	41.96	117.041	0.907	390.886	30343	1.293	0.774	0.955	0.983113
479	CEP164_KAN630-16_2.tif:0015-1094	1.623	227.381	0	926	104.77	124.234	0.955	369.077	28650	1.097	0.912	0.981	0.92826
480	CEP164_KAN630-16_2.tif:0016-1164	1.778	162.964	0	1067	46.301	132.121	0.904	289.709	22489	1.343	0.744	0.923	0.728644
481	CEP164_KAN630-16_2.tif:0017-1245	1.507	204.026	0	1091	75.656	141.356	0.924	307.512	23871	1.084	0.923	0.987	0.77342
482	CEP164_KAN630-16_2.tif:0018-1269	1.778	202.442	0	1103	127.961	144.021	0.939	359.891	27937	1.259	0.794	0.955	0.905159
483	CEP164_KAN630-16_3.tif:0001-0036	1.804	275.064	0	1604	84.01	4.154	0.953	496.083	38509	1.262	0.793	0.962	1.24769
484	CEP164_KAN630-16_3.tif:0002-0087	1.791	274.576	0	1942	36.443	9.934	0.972	491.664	38166	1.157	0.864	0.959	1.23658
485	CEP164_KAN630-16_3.tif:0003-0121	1.778	165.138	0	1016	94.333	13.801	0.965	293.574	22789	1.093	0.915	0.955	0.738364
486	CEP164_KAN630-16_3.tif:0004-0268	1.855	241.354	0	1463	116.215	30.48	0.929	447.723	34755	1.118	0.894	0.966	1.12606
487	CEP164_KAN630-16_3.tif:0005-0274	2.448	220.737	0	1865	10.075	31.064	0.91	540.282	41940	1.23	0.813	0.945	1.35886
488	CEP164_KAN630-16_3.tif:0006-0361	0.812	170.127	0	1114	44.498	40.967	0.937	138.072	10718	1.039	0.963	0.992	0.347263
489	CEP164_KAN630-16_3.tif:0007-0503	2.499	169.448	0	1647	43.028	57.123	0.861	423.478	32873	1.141	0.876	0.919	1.06509
490	CEP164_KAN630-16_3.tif:0008-0524	2.19	282.206	0	2360	86.941	59.499	0.9	618.026	47975	1.262	0.793	0.977	1.55439
491	CEP164_KAN630-16_3.tif:0009-0582	2.538	209.188	0	1674	118.653	66.025	0.863	530.878	41210	1.532	0.653	0.973	1.3352
492	CEP164_KAN630-16_3.tif:0010-0636	1.675	322.992	0	2246	15.052	72.272	0.946	540.913	41989	1.214	0.824	0.963	1.36044
493	CEP164_KAN630-16_3.tif:0011-0746	1.932	132.687	0	630	1.606	84.71	0.908	256.395	19903	1.209	0.827	0.962	0.644857
494	CEP164_KAN630-16_3.tif:0012-0775	2.267	158.591	0	975	33.016	88.028	0.892	359.569	27912	1.508	0.663	0.959	0.904349
495	CEP164_KAN630-16_3.tif:0013-0822	2.306	231.782	0	1873	94.784	93.336	0.898	534.472	41489	1.31	0.764	0.923	1.34424
496	CEP164_KAN630-16_3.tif:0014-0853	2.242	214.201	0	1860	63.653	96.845	0.903	480.134	37271	1.327	0.754	0.943	1.20758
497	CEP164_KAN630-16_3.tif:0015-0969	1.739	223.193	0	1554	21.969	110.016	0.944	388.155	30131	1.099	0.91	0.951	0.976244
498	CEP164_KAN630-16_3.tif:0016-1039	1.649	170.578	0	860	6.279	117.957	0.881	281.271	21834	1.374	0.728	0.966	0.707422
499	CEP164_KAN630-16_3.tif:0017-1125	2.242	186.931	0	1716	95	127.637	0.861	419.008	32526	1.328	0.753	0.921	1.05384
500	CEP164_KAN630-16_3.tif:0018-1157	1.713	215.91	0	1314	63.078	131.321	0.915	369.927	28716	1.087	0.92	0.971	0.930398
501	CEP164_KAN630-16_3.tif:0019-1241	2.203	165.637	0	1099	142.147	140.91	0.896	364.877	28324	1.319	0.758	0.953	0.917698
502	CEP164_KAN630-16_4.tif:0001-0110	2.023	186.541	0	932	81.496	12.482	0.872	377.283	29287	1.302	0.768	0.949	0.948899
503	CEP164_KAN630-16_4.tif:0002-0172	2.332	274.072	0	2743	90.066	19.566	0.848	639.05	49607	1.334	0.749	0.921	1.60727
504	CEP164_KAN630-16_4.tif:0003-0187	2.229	246.121	0	1585	130.271	21.269	0.907	548.513	42579	1.252	0.799	0.961	1.37956
505	CEP164_KAN630-16_4.tif:0004-0215	1.855	192.903	0	1269	8.268	24.367	0.929	357.843	27778	1.134	0.882	0.98	0.900007
506	CEP164_KAN630-16_4.tif:0005-0250	2.126	284.679	0	2180	34.178	28.36	0.886	605.105	46972	1.435	0.697	0.946	1.52189
507	CEP164_KAN630-16_4.tif:0006-0296	1.868	311.441	0	2301	114.206	33.632	0.95	581.75	45159	1.112	0.9	0.954	1.46315
508	CEP164_KAN630-16_4.tif:0007-0335	2.422	224.011	0	1749	64.004	38.062	0.88	542.523	42114	1.189	0.841	0.938	1.36449
509	CEP164_KAN630-16_4.tif:0008-0495	2.035	213	0	1701	84.957	56.29	0.9	433.539	33654	1.232	0.811	0.958	1.09039
510	CEP164_KAN630-16_4.tif:0009-0570	2.126	208.442	0	1439	38.411	64.684	0.917	443.059	34393	1.166	0.858	0.962	1.11433
511	CEP164_KAN630-16_4.tif:0010-0641	1.752	210.89	0	1309	1.069	72.777	0.926	369.476	28681	1.063	0.941	0.951	0.929264
512	CEP164_KAN630-16_4.tif:0011-0654	2.242	259.695	0	2118	110.946	74.23	0.87	582.11	45187	1.371	0.729	0.964	1.46406
513	CEP164_KAN630-16_4.tif:0012-0676	2.242	169.977	0	958	81.864	76.785	0.934	381.005	29576	1.177	0.85	0.961	0.958262
514	CEP164_KAN630-16_4.tif:0013-0683	1.829	238.521	0	1587	11.742	77.537	0.966	436.322	33870	1.151	0.869	0.966	1.09739
515	CEP164_KAN630-16_4.tif:0014-0719	2.383	147.741	0	769	126.304	81.61	0.895	352.098	27332	1.104	0.906	0.944	0.885557
516	CEP164_KAN630-16_4.tif:0015-0784	2.138	136.53	0	936	47.144	89.046	0.849	291.963	22664	1.267	0.789	0.93	0.734314
517	CEP164_KAN630-16_4.tif:0016-0905	1.816	134.007	0	607	133.236	102.738	0.934	243.41	18895	1.102	0.908	0.962	0.612198
518	CEP164_KAN630-16_4.tif:0017-0929	2.435	250.81	0	2099	82.7	105.478	0.865	610.657	47403	1.736	0.576	0.962	1.53586
519	CEP164_KAN630-16_4.tif:0018-0933	1.997	173.335	0	1075	112.739	105.911	0.883	346.107	26867	1.299	0.77	0.951	0.870491
520	CEP164_KAN630-16_4.tif:0019-0940	2.19	170.506	0	1244	126.645	106.781	0.913	373.405	28986	1.252	0.798	0.96	0.939146
521	CEP164_KAN630-16_4.tif:0020-0960	1.713	259.977	0	1783	90.334	108.993	0.941	445.43	34577	1.069	0.935	0.967	1.12029
522	CEP164_KAN630-16_4.tif:0021-1085	2.164	173.94	0	1329	124.005	123.139	0.851	376.445	29222	1.325	0.755	0.901	0.946793
523	CEP164_KAN630-16_4.tif:0022-1086	1.7	191.841	0	1316	7.563	123.258	0.898	326.217	25323	1.261	0.793	0.933	0.820465
524	CEP164_KAN630-16_4.tif:0023-1094	1.791	199.655	0	1218	62.039	124.179	0.921	357.508	27752	1.117	0.896	0.949	0.899165
525	CEP164_KAN630-16_4.tif:0024-1096	2.138	207.705	0	2054	84.136	124.473	0.861	444.167	34479	1.35	0.741	0.92	1.11712
526	CEP164_KAN630-16_4.tif:0025-1102	1.417	162.336	0	805	48.193	125.146	0.98	230.038	17857	1.139	0.878	0.969	0.578567
527	CEP164_KAN630-16_4.tif:0026-1162	1.662	233.705	0	1586	96.656	131.901	0.939	388.374	30148	1.068	0.936	0.963	0.976795
528	CEP164_KAN630-16_4.tif:0027-1269	1.7	212.826	0	1236	115.976	144.056	0.961	361.901	28093	1.126	0.888	0.967	0.910213
										30864.2				1

## Sheet: IF summary
Exp. number	Cell line	Gene induced	Culture condition, fixation condition	rabbit-Alexa488	mouse IgG1-Alexa568	mouse IgG2b-Alexa647	Nuclear stain	Date	Replicate
KAN630-1	RPE-BFP-Cas9 pMCB306 (pool)		serum starved for 24 hours, fixed in 4% PFA at RT for 15 mintues	CEP164, 22227-1-AP, Proteintech, 1:1000	CEP170, Invitrogen, 41-3200, 1:1000	FGFR1OP, Abnova, H00011116-M01, 1:1000	DAPI	2021-03-17	No.6
KAN630-2	RPE-BFP-Cas9 CEP164KO (pool)		serum starved for 24 hours, fixed in 4% PFA at RT for 15 mintues	CEP164, 22227-1-AP, Proteintech, 1:1000	CEP170, Invitrogen, 41-3200, 1:1000	FGFR1OP, Abnova, H00011116-M01, 1:1000	DAPI	2021-03-17	No.6
KAN630-3	RPE-BFP-Cas9 CEP83 KO (pool)		serum starved for 24 hours, fixed in 4% PFA at RT for 15 mintues	CEP164, 22227-1-AP, Proteintech, 1:1000	CEP170, Invitrogen, 41-3200, 1:1000	FGFR1OP, Abnova, H00011116-M01, 1:1000	DAPI	2021-03-17	No.6
KAN630-4	RPE-BFP-Cas9 SCLT1 KO (pool)		serum starved for 24 hours, fixed in 4% PFA at RT for 15 mintues	CEP164, 22227-1-AP, Proteintech, 1:1000	CEP170, Invitrogen, 41-3200, 1:1000	FGFR1OP, Abnova, H00011116-M01, 1:1000	DAPI	2021-03-17	No.6
KAN630-5	RPE-BFP-Cas9 FBF1 KO (pool)		serum starved for 24 hours, fixed in 4% PFA at RT for 15 mintues	CEP164, 22227-1-AP, Proteintech, 1:1000	CEP170, Invitrogen, 41-3200, 1:1000	FGFR1OP, Abnova, H00011116-M01, 1:1000	DAPI	2021-03-17	No.6
KAN630-6	RPE-BFP-Cas9 CEP89KO (pool)		serum starved for 24 hours, fixed in 4% PFA at RT for 15 mintues	CEP164, 22227-1-AP, Proteintech, 1:1000	CEP170, Invitrogen, 41-3200, 1:1000	FGFR1OP, Abnova, H00011116-M01, 1:1000	DAPI	2021-03-17	No.6
KAN630-7	RPE-BFP-Cas9 CCDC92 KO (pool)		serum starved for 24 hours, fixed in 4% PFA at RT for 15 mintues	CEP164, 22227-1-AP, Proteintech, 1:1000	CEP170, Invitrogen, 41-3200, 1:1000	FGFR1OP, Abnova, H00011116-M01, 1:1000	DAPI	2021-03-17	No.6
KAN630-8	RPE-BFP-Cas9 ANKRD26 KO (pool)		serum starved for 24 hours, fixed in 4% PFA at RT for 15 mintues	CEP164, 22227-1-AP, Proteintech, 1:1000	CEP170, Invitrogen, 41-3200, 1:1000	FGFR1OP, Abnova, H00011116-M01, 1:1000	DAPI	2021-03-17	No.6
KAN630-9	RPE-BFP-Cas9 TTBK2 KO (pool)		serum starved for 24 hours, fixed in 4% PFA at RT for 15 mintues	CEP164, 22227-1-AP, Proteintech, 1:1000	CEP170, Invitrogen, 41-3200, 1:1000	FGFR1OP, Abnova, H00011116-M01, 1:1000	DAPI	2021-03-17	No.6
KAN630-10	RPE-BFP-Cas9 INPP5E KO (pool)		serum starved for 24 hours, fixed in 4% PFA at RT for 15 mintues	CEP164, 22227-1-AP, Proteintech, 1:1000	CEP170, Invitrogen, 41-3200, 1:1000	FGFR1OP, Abnova, H00011116-M01, 1:1000	DAPI	2021-03-17	No.6
KAN630-11	RPE-BFP-Cas9 Kiz KO (pool)		serum starved for 24 hours, fixed in 4% PFA at RT for 15 mintues	CEP164, 22227-1-AP, Proteintech, 1:1000	CEP170, Invitrogen, 41-3200, 1:1000	FGFR1OP, Abnova, H00011116-M01, 1:1000	DAPI	2021-03-17	No.6
KAN630-12	RPE-BFP-Cas9 LRRC45 KO (pool)		serum starved for 24 hours, fixed in 4% PFA at RT for 15 mintues	CEP164, 22227-1-AP, Proteintech, 1:1000	CEP170, Invitrogen, 41-3200, 1:1000	FGFR1OP, Abnova, H00011116-M01, 1:1000	DAPI	2021-03-17	No.6
KAN630-13	RPE-BFP-Cas9 NCS1 KO (pool)		serum starved for 24 hours, fixed in 4% PFA at RT for 15 mintues	CEP164, 22227-1-AP, Proteintech, 1:1000	CEP170, Invitrogen, 41-3200, 1:1000	FGFR1OP, Abnova, H00011116-M01, 1:1000	DAPI	2021-03-17	No.6
KAN630-14	RPE-BFP-Cas9 C3orf14 KO (pool)		serum starved for 24 hours, fixed in 4% PFA at RT for 15 mintues	CEP164, 22227-1-AP, Proteintech, 1:1000	CEP170, Invitrogen, 41-3200, 1:1000	FGFR1OP, Abnova, H00011116-M01, 1:1000	DAPI	2021-03-17	No.6
KAN630-15	RPE-BFP-Cas9 FOP KO (pool)		serum starved for 24 hours, fixed in 4% PFA at RT for 15 mintues	CEP164, 22227-1-AP, Proteintech, 1:1000	CEP170, Invitrogen, 41-3200, 1:1000	FGFR1OP, Abnova, H00011116-M01, 1:1000	DAPI	2021-03-17	No.6
KAN630-16	RPE-BFP-Cas9 sgSafe (pool)		serum starved for 24 hours, fixed in 4% PFA at RT for 15 mintues	CEP164, 22227-1-AP, Proteintech, 1:1000	CEP170, Invitrogen, 41-3200, 1:1000	FGFR1OP, Abnova, H00011116-M01, 1:1000	DAPI	2021-03-17	No.6

## Sheet: After ROUT
sgSafe	CEP164KO	CEP83KO	SCLT1KO	FBF1KO	CEP89KO	CCDC92KO	ANKRD26KO	TTBK2KO	INPP5EKO	KIZ KO	LRRC45 KO	NCS1 KO	C3orf14 KO
1.26525	0.0543996	0.0602316	0.18562	1.00962	1.27967	1.23402	0.392461	0.283046	0.935356	1.06833	0.877781	0.941965	0.860836
1.27857	0.0685908	0.0782784	0.234382	1.16248	0.968792	0.754952	0.455965	0.324389	0.883127	0.42687	0.836406	0.329119	0.933314
1.37454	0.0513864	0.252428	0.167832	0.306115	1.12833	0.99698	0.386435	0.562918	1.47767	0.237622	1.29451	0.300251	1.05051
1.37418	0.043902	0.0429948	0.098334	1.03158	0.625223	1.06538	0.637729	0.712444	1.38737	1.10947	1.38296	1.31301	2.13299
1.83552	0.0506736			1.06641	0.553295	0.973102	0.588157	0.223916	1.56379	0.817452	1.01992	1.10351	1.03887
0.765223	0.0324	0.417701	0.396155	0.9095	0.742252	0.984766	0.405648	0.287939	1.26208	0.21303	1.194	0.715068	0.160056
0.833684	0.0224208	0.25988	0.0897156	0.295358	0.588643	0.78907	0.37111	0.3645	1.28881	0.778669	0.942646	1.12668	1.1362
1.36722	0.0370332	0.379404		0.524362	0.612749	0.953564	0.471744	0.443329	0.86994	1.12911	0.1319	0.7452	1.31768
1.31249	0.0302292	0.0274428	0.191192	0.870232	0.523811	0.73723	0.658627	0.579377	1.23535	0.963382	1.20978	0.269924	0.9257
0.936101	0.0571212	0.0497988	0.104684	0.743807	1.08527	1.18309	0.291697	0.273424	1.05394	0.831254	1.16886	0.65124	1.47718
1.05472	0.117385	0.472878	0.22262	0.87953	0.61978	1.13711	0.370624	0.508388	0.828954	1.32526	0.956545	1.18859	0.89006
0.246596	0.0501552	0.071604	0.126976	1.16348	0.925214	0.915786	0.55485	0.278219	0.434095	1.43726	1.30167	0.813013	0.795517
0.814568	0.0550152	0.0427356	0.182444	0.244004	0.757674	1.22508	0.780386	0.516845	1.22177	0.969635	0.587347	0.345967	0.552647
1.17363	0.107244	0.255733	0.0709884	1.0635	0.783788	0.938984	0.6781	0.489305	1.02886	1.09684	0.214715	0.846709	0.641779
0.787417	0.0831384	0.0833976	0.109577	0.613105	0.406361	0.985835	0.737942	0.738364	1.07973	1.25799	1.29535	0.451332	1.12584
0.735188	0.0340848	0.272063	0.0715716	0.63086	0.505278	0.463547	0.429138	0.335048	1.02267	1.07493	0.402732	0.417118	1.13714
0.902146	0.06318	0.265194	0.102773	0.895406	0.485741	0.717077	0.354197	0.153317	0.780322	1.24137	0.7267	1.03379	1.17421
1.14573	0.0687852	0.0390744	0.349272	0.42998	0.533434	0.933314	0.358927	0.110354	0.771217	1.21072	0.917309	0.536641	0.923497
1.12146	0.0232632	0.088776	0.1076	0.792698	0.51341	0.884552	0.510916		0.916402	0.907654	0.969635	0.693943	1.08867
1.33624	0.0979452	0.07209	0.140486	0.227707	0.435197	1.31061	0.572832	0.505796	0.766843	1.45071	0.508745	0.30861	1.04198
1.18986	0.0308124	0.0601992	0.136242	0.906552	0.711925	0.493517	0.666274	0.3321	1.12616	1.74947	0.982174	0.815605	0.615794
1.15007	0.0787644	0.235159	0.235678	0.839905	0.808736	0.851764	0.332489	0.622436	1.3135	1.54759	0.807149	0.950778	1.00839
1.04707	0.027216	0.064314		0.50071	0.941706	1.16983	0.487069	0.236974	0.552712	1.09953	1.05051	0.90409	0.864464
1.29282	0.0547236	0.28013	0.06399	0.893657	1.36051	1.26473	0.267559	0.422269	0.443588	0.438826	0.628819	0.28836	0.952754
0.981688	0.0444528		0.22829	1.29995	0.799762	0.045036	0.352253	0.431892	1.19174	1.11456	0.325879	1.02193	0.92651
1.20758	0.041958	0.0576396	0.138154	1.02446	1.03424	1.02847	0.59467	0.315155	1.14165	1.17233	0.961016	1.01001	1.05754
0.102676	0.0500904	0.331679	0.239404	0.90801	0.779641	1.59405	0.583686	0.325393	1.1917	0.796003	0.220774	1.00579	0.214553
0.218506	0.0366444	0.044226	0.153835	1.14213	1.10957	0.990403	0.356141	0.23153	1.14032	1.30404	0.712346	0.214099	1.08828
1.27416	0.0636984	0.0690768	0.112752	1.09561	0.989399	0.274428	0.686038	0.721645	1.18821	1.33896	1.49332	0.999443	0.921326
0.987163		0.0509976	0.16537	1.65849	0.743126	1.0414	0.795323	0.357793	1.44912	0.118228	1.02802	0.960628	1.54185
0.983113	0.0578016	0.0558252	0.127818	0.822928	0.50126	0.888764	0.476701	0.308092	0.941252	1.1874	0.97051	0.801317	1.08676
0.92826	0.0655776	0.0281232	0.0995328	0.973361	1.05125	0.802289	0.488268	0.352642	1.07581	0.227675	1.20431	0.737132	1.26263
0.728644	0.0621108	0.104198	0.133164	1.01396	0.746885	0.890482	0.451073	0.237816	0.5207	0.982174	0.429203	0.869551	1.46733
0.77342	0.037584	0.257483	0.279223	0.846871	1.1225	1.27209	0.508064	0.289105	1.36025	0.614272	0.77436	0.490763	0.769986
0.905159	0.0867672	0.0768852	0.155423	1.19456	0.80122	0.664394	0.33709	0.172919	0.868482	1.20534	1.07736	0.299959	0.984992
1.24769	0.033534	0.061074	0.170845	0.619456	0.646348	0.378464	0.718049	0.242676	0.93623	0.918832	1.149	0.688662	1.33504
1.23658	0.0386532	0.11664	0.129341	0.51597	0.563566	0.80906	0.668574	0.46102	1.13705	0.836341	0.460566	0.634716	0.570013
0.738364	0.0219672	0.0949968	0.128984	0.638248	0.796133	0.497081	0.594054	0.411804	1.12308	1.12243	1.03055	1.1063	0.849236
1.12606	0.0286092	0.0819072	0.209077	0.389059	0.822312	0.245041	0.654836	0.373442	0.288554	1.49607	1.11809	0.698058	0.200783
1.35886	0.0271188	0.163328	0.328147	1.13384	0.722747	0.610772	0.494813	0.233604	0.985964	1.22511	0.728158	1.032	0.586343
0.347263	0.0569592		0.368194	0.0820692	0.84901	1.09418	0.412031	0.420714	1.27141	0.372114	0.922363	0.359057	0.86751
1.06509	0.0882576	0.386888	0.130637	1.17311	0.606658	1.03379	0.491152	0.135497	0.716688	1.28725	0.668477	0.660053	0.547916
1.55439			0.0727704	1.11362	0.582811	0.613267	0.606884	0.211216	0.835499	0.321149	0.77517	0.917633	1.40295
1.3352	0.0455868	0.163069	0.184518	0.255604	0.580154	1.05935	0.429916	0.525204	0.266004	1.27854	0.868968	0.968566	0.836179
1.36044		0.362362	0.156136	0.867737	0.498636	0.697993	0.483084	0.442552	0.823673	1.43253	0.973264	0.677808	0.840229
0.644857	0.0192456	0.0832356	0.108346	1.37629	1.31842	1.29765	0.807052	0.311234	1.17408	1.48253	1.15095	0.999119	0.828727
0.904349		0.10543	0.106337	0.93163	1.08744	1.3885	0.472684	0.267624	0.772837	1.26405	0.746464	1.06356	0.360385
1.34424		0.0358668	0.0940896	1.03907	1.55488	0.747857	0.49653	0.22518	1.44199	0.995069	0.986904	0.864562	1.08634
1.20758		0.11745	0.158339	0.874411	1.30604	0.878753	0.696276	0.197413	1.08167	1.35114	1.1989	1.21186	1.48664
0.976244		0.0472716	0.100051	0.882803	1.51859	1.28259	0.604746	0.625514	1.4371	0.545033	0.303718	1.20483	0.338288
0.707422		0.123217	0.0849528	1.24746	0.117029	0.668801	0.404384	0.708426	0.652115	0.841201	1.01269	0.459659	0.926608
1.05384		0.127073	0.072738	0.915916	0.641909	0.77044	0.389156	0.446245	0.568296	0.268661	1.09334	1.0519	0.460534
0.930398		0.0889056	0.0692712	1.12814	1.05242	1.27637	0.60439	0.345287	1.03952	0.882965	0.788713	1.2614	0.103
0.917698		0.0722844	0.0645732	0.759553	1.20285	0.891324	0.558738	0.580543		1.3503	1.10085	1.13468	0.906844
0.948899		0.304754	0.135659	0.713707	0.652471	0.656942	0.354683	0.593568	1.36916		1.45366	0.339228	0.95891
1.60727		0.0972	0.119912	0.390226	0.918572	0.660409	0.343861	0.381575			0.826654	0.854874	0.443686
1.37956		0.102254	0.298274	0.523163	0.68377	0.989302	0.297529	0.409147	0.707648		0.962183	1.70904	0.314993
0.900007		0.429008	0.197802	0.612846	1.10497	0.325361	0.627394	0.28755	0.975402		0.917503	1.03	0.98078
1.52189		0.0384912		0.774101	1.14472	0.968371	0.719377	0.260852	0.6399		0.849431	1.1711	0.850889
1.46315		0.205772	0.172433	1.14051	1.13487	0.765288	0.620946	0.239501	0.769662		0.733374	1.02902	0.821923
1.36449		0.0968436		1.05857	1.09992	0.869843	0.675216	0.631249	0.66919		0.261176	1.50297	0.804298
1.09039		0.0207036	0.134298	0.727931	0.683802	0.948283	0.53554	0.779933	1.33877		0.75249	0.759359	0.769111
1.11433		0.0552096	0.153576	0.968533	0.880146	1.20039	0.426935	0.415951	1.19086		0.945432	1.59774	1.41594
0.929264		0.0251748	0.0527148	0.907265	0.885881	1.00197	0.682636	0.387634	1.0335		0.74776	1.55128	1.25757
1.46406			0.281102	1.02643	0.41297		0.491897	0.314734	0.983632		1.08242	0.530906	1.50874
0.958262				0.757382	1.0217	0.837994	0.590749	0.122893	0.609023		0.94676	1.09308	0.235256
1.09739			0.281005	1.01218	1.20227	1.08718	0.52961	0.517493	1.20839		1.19734	0.379922	0.464843
0.885557			0.279094	0.956902	0.769597	0.897124	0.729162	0.275497	1.63986		0.989528	0.64476	0.770148
0.734314			0.0707292	1.14216	0.967399	0.70807	0.660344	0.430304	0.896962		1.40632	0.350244	1.03291
0.612198			0.0226476	0.836244	0.690282	1.27134	0.600275	0.335534	1.34946		1.01768	0.646186	1.12619
1.53586			0.06318	0.671911	0.357178	1.02497	0.503852	0.352609	1.6941		0.232924		1.26869
0.870491			0.0961308	0.438988	0.412679	1.24102	0.227999	0.210665	0.482015		0.649004		0.653573
0.939146			0.229036	0.688565	1.23943	0.558738		0.239695	1.26528		0.879142		0.928908
1.12029			0.21465	0.782719	1.19977	0.995749			1.48722		0.866084		1.12661
0.946793			0.121792	0.819526	0.965423	0.32076			1.24017		1.25949		0.741668
0.820465			0.104555	0.753656	0.924955	1.16073			1.25592		0.999961		0.24786
0.899165			0.31415	0.543866	1.77737	0.690541			1.20275		0.811523		0.474368
1.11712			0.24138	0.684126	1.92372	1.05925			0.42376		1.04354		1.04114
0.578567			0.216335		0.940637	0.701622			0.983599		0.824256		1.039
0.976795			0.143629		0.202046	1.05258			1.06567		0.860836		0.822215
0.910213			0.277506		1.62068	0.800215			0.9616		0.0513864		1.08582
			0.0972		1.18995	0.64651			0.504662		0.682376		1.0634
			0.196798		0.82714	0.298955			0.736582
			0.0580608		1.24503	0.915883			0.816221
			0.0739044		1.58906	0.782752			0.670615
			0.14836		0.955832				0.551545
					1.21724
					0.54338
					1.26852
					1.02983
					1.13734
					0.686653
					0.794318
