# Supplementary material for: A hierarchical pathway for assembly of the distal appendages that organize primary cilia
Source: eLife. 2025 Jan 30;14:e85999. doi: 10.7554/eLife.85999 (PMC11984956; doi:10.7554/eLife.85999)
Supplement: Figure 2—source data 2. [file elife-85999-fig2-data2.xlsx]

## Sheet: Raw data 
417	CEP83_KAN699-1_1.tif:0001-0074	1.7	69.409	0	504	56.212	8.382	0.965	118.027	9162	1.21	0.826	0.93	0.841682
418	CEP83_KAN699-1_1.tif:0002-0170	1.7	129.508	0	675	91.466	19.253	0.842	220.222	17095	1.666	0.6	0.923	1.57046
419	CEP83_KAN699-1_1.tif:0003-0181	1.404	104.972	0	497	132.769	20.481	0.865	147.399	11442	1.526	0.655	0.928	1.05114
420	CEP83_KAN699-1_1.tif:0004-0214	1.765	51.891	0	311	125.994	24.254	0.912	91.58	7109	1.318	0.759	0.919	0.653079
421	CEP83_KAN699-1_1.tif:0005-0249	1.7	53.03	0	246	70.063	28.298	0.855	90.176	7000	1.58	0.633	0.917	0.643066
422	CEP83_KAN699-1_1.tif:0006-0332	1.688	137.115	0	815	43.713	37.679	0.882	231.391	17962	1.135	0.881	0.913	1.65011
423	CEP83_KAN699-1_1.tif:0007-0354	1.662	43.264	0	153	91.324	40.206	0.849	71.896	5581	1.568	0.638	0.896	0.512707
424	CEP83_KAN699-1_1.tif:0008-0366	1.649	93.172	0	409	141.808	41.563	0.91	153.634	11926	1.345	0.744	0.918	1.0956
425	CEP83_KAN699-1_1.tif:0009-0487	1.855	108.271	0	473	133.707	55.299	0.804	200.847	15591	1.575	0.635	0.881	1.43229
426	CEP83_KAN699-1_1.tif:0010-0643	1.327	68.641	0	215	20.392	73.014	0.918	91.078	7070	1.191	0.84	0.945	0.649497
427	CEP83_KAN699-1_1.tif:0011-0660	1.314	84.765	0	317	73.273	74.955	0.926	111.38	8646	1.232	0.812	0.911	0.794278
428	CEP83_KAN699-1_1.tif:0012-0723	1.778	137.819	0	990	92.387	82.079	0.839	245.008	19019	1.47	0.68	0.885	1.74721
429	CEP83_KAN699-1_1.tif:0013-0749	1.507	43.812	0	316	123.272	85.061	0.944	66.034	5126	1.127	0.887	0.911	0.470908
430	CEP83_KAN699-1_1.tif:0014-0826	1.43	52.685	0	238	103.714	93.877	0.935	75.335	5848	1.267	0.789	0.925	0.537236
431	CEP83_KAN699-1_1.tif:0015-0833	1.52	111.525	0	343	143.248	94.596	0.873	169.53	13160	1.452	0.689	0.904	1.20896
432	CEP83_KAN699-1_1.tif:0016-0915	1.314	53.471	0	214	132.797	103.887	0.968	70.26	5454	1.185	0.844	0.94	0.50104
433	CEP83_KAN699-1_2.tif:0001-0125	1.366	22.849	0	113	9.443	14.184	0.866	31.201	2422	1.577	0.634	0.906	0.222501
434	CEP83_KAN699-1_2.tif:0002-0134	1.688	99.046	0	737	67.133	15.206	0.849	167.147	12975	1.355	0.738	0.888	1.19197
435	CEP83_KAN699-1_2.tif:0003-0136	1.829	113.289	0	388	142.811	15.398	0.821	207.237	16087	1.475	0.678	0.893	1.47786
436	CEP83_KAN699-1_2.tif:0004-0300	1.726	47.515	0	226	118.619	34.059	0.927	82.021	6367	1.322	0.756	0.944	0.584914
437	CEP83_KAN699-1_2.tif:0005-0310	1.378	24.813	0	114	19.742	35.176	0.929	34.202	2655	1.405	0.712	0.918	0.243906
438	CEP83_KAN699-1_2.tif:0006-0320	2.151	207.036	0	1532	56.854	36.31	0.674	445.404	34575	2.35	0.426	0.886	3.17629
439	CEP83_KAN699-1_2.tif:0007-0463	1.688	118.137	0	598	104.647	52.468	0.849	199.366	15476	1.468	0.681	0.91	1.42173
440	CEP83_KAN699-1_2.tif:0008-0475	1.494	29.595	0	171	3.824	53.927	0.883	44.225	3433	1.301	0.769	0.903	0.315378
441	CEP83_KAN699-1_2.tif:0009-0572	1.507	37.915	0	208	41.703	64.879	0.928	57.146	4436	1.209	0.827	0.936	0.40752
442	CEP83_KAN699-1_2.tif:0010-0580	2.061	131.994	0	783	143.221	65.963	0.795	272.06	21119	1.097	0.911	0.86	1.94013
443	CEP83_KAN699-1_2.tif:0011-0657	1.778	54.638	0	415	104.699	74.546	0.839	97.132	7540	1.278	0.783	0.885	0.692674
444	CEP83_KAN699-1_2.tif:0012-0713	1.443	75.384	0	378	86.022	80.848	0.775	108.765	8443	1.417	0.706	0.865	0.77563
445	CEP83_KAN699-1_2.tif:0013-0744	1.597	121.371	0	595	40.131	84.439	0.917	193.878	15050	1.565	0.639	0.947	1.38259
446	CEP83_KAN699-1_2.tif:0014-0804	1.662	39.031	0	184	65.09	91.242	0.805	64.862	5035	1.824	0.548	0.89	0.462548
447	CEP83_KAN699-1_2.tif:0015-0817	1.688	39.252	0	345	12.6	92.68	0.805	66.241	5142	1.324	0.755	0.873	0.472378
448	CEP83_KAN699-1_2.tif:0016-0877	1.327	39.524	0	198	95.563	99.526	0.978	52.444	4071	1.276	0.784	0.954	0.373989
449	CEP83_KAN699-1_2.tif:0017-0882	1.559	10.24	0	120	97.58	100.143	0.895	15.961	1239	1.204	0.831	0.91	0.113823
450	CEP83_KAN699-1_2.tif:0018-1138	1.443	88.759	0	544	52.333	129.191	0.853	128.062	9941	1.199	0.834	0.875	0.913246
451	CEP83_KAN699-1_3.tif:0001-0070	1.829	37.796	0	287	97.274	7.987	0.91	69.139	5367	1.436	0.697	0.919	0.493048
452	CEP83_KAN699-1_3.tif:0002-0140	1.572	134.18	0	618	30.939	15.872	0.968	210.882	16370	1.12	0.892	0.942	1.50386
453	CEP83_KAN699-1_3.tif:0003-0310	1.804	48.35	0	281	59.699	35.263	0.883	87.2	6769	1.325	0.755	0.924	0.621845
454	CEP83_KAN699-1_3.tif:0004-0414	1.7	47.598	0	372	133.923	46.966	0.855	80.939	6283	1.387	0.721	0.886	0.577198
455	CEP83_KAN699-1_3.tif:0005-0446	2.023	68.369	0	484	73.981	50.653	0.762	138.278	10734	1.139	0.878	0.844	0.986096
456	CEP83_KAN699-1_3.tif:0006-0721	1.726	36.493	0	157	25.395	81.898	0.916	62.994	4890	1.306	0.765	0.918	0.449228
457	CEP83_KAN699-1_3.tif:0007-0795	1.829	94.415	0	862	75.561	90.262	0.773	172.712	13407	1.877	0.533	0.885	1.23166
458	CEP83_KAN699-1_3.tif:0008-0969	1.34	57.865	0	345	66.931	110.027	0.956	77.525	6018	1.059	0.944	0.941	0.552853
459	CEP83_KAN699-1_3.tif:0009-0989	1.391	118.194	0	636	138.139	112.333	0.842	164.442	12765	1.31	0.763	0.923	1.17268
460	CEP83_KAN699-1_3.tif:0010-1256	1.443	47.464	0	310	32.118	142.589	0.853	68.482	5316	1.619	0.618	0.896	0.488363
461	CEP83_KAN699-1_3.tif:0011-1256	1.494	59.448	0	406	79.26	142.622	0.883	88.836	6896	1.528	0.654	0.913	0.633512
462	CEP83_KAN699-1_4.tif:0001-0110	1.868	124.434	0	852	40.689	12.438	0.817	232.434	18043	1.602	0.624	0.89	1.65755
463	CEP83_KAN699-1_4.tif:0002-0144	1.443	113.598	0	804	83.26	16.341	0.838	163.901	12723	1.495	0.669	0.903	1.16882
464	CEP83_KAN699-1_4.tif:0003-0210	2.1	21.969	0	70	1.878	23.84	0.956	46.131	3581	1.082	0.925	0.924	0.328974
465	CEP83_KAN699-1_4.tif:0004-0210	1.765	110.263	0	944	132.475	23.798	0.761	194.599	15106	1.839	0.544	0.916	1.38774
466	CEP83_KAN699-1_4.tif:0005-0321	1.752	201.243	0	969	54.136	36.445	0.673	352.574	27369	2.162	0.463	0.886	2.5143
467	CEP83_KAN699-1_4.tif:0006-0321	1.572	104.172	0	651	32.393	36.436	0.75	163.721	12709	1.703	0.587	0.859	1.16753
468	CEP83_KAN699-1_4.tif:0007-0415	2.087	126.864	0	747	82.908	47.084	0.813	264.756	20552	1.744	0.573	0.915	1.88804
469	CEP83_KAN699-1_4.tif:0008-0512	1.585	56.106	0	310	36.308	58.176	0.899	88.9	6901	1.257	0.795	0.908	0.633971
470	CEP83_KAN699-1_4.tif:0009-0529	1.675	41.615	0	290	3.608	60.118	0.829	69.693	5410	1.84	0.544	0.942	0.496998
471	CEP83_KAN699-1_4.tif:0010-0562	1.572	182.279	0	1089	136.329	63.773	0.877	286.476	22238	1.216	0.822	0.928	2.04293
472	CEP83_KAN699-1_4.tif:0011-0603	1.649	140.977	0	950	98.355	68.48	0.921	232.46	18045	1.336	0.748	0.924	1.65773
473	CEP83_KAN699-1_4.tif:0012-0641	1.907	133.257	0	892	118.559	72.719	0.834	254.064	19722	1.437	0.696	0.892	1.81179
474	CEP83_KAN699-1_4.tif:0013-0685	1.52	111.602	0	782	24.269	77.779	0.964	169.646	13169	1.064	0.94	0.929	1.20979
475	CEP83_KAN699-1_4.tif:0014-0748	1.61	22.336	0	176	80.641	84.942	0.855	35.967	2792	1.472	0.679	0.903	0.256491
476	CEP83_KAN699-1_4.tif:0015-0924	1.417	28.864	0	204	53.954	104.871	0.967	40.901	3175	1.198	0.834	0.936	0.291676
477	CEP83_KAN699-1_4.tif:0016-1076	1.288	44.08	0	258	79.821	122.15	0.817	56.785	4408	1.738	0.575	0.901	0.404948
478	CEP83_KAN699-1_5.tif:0001-0099	1.314	21.716	0	86	105.666	11.238	0.955	28.534	2215	1.215	0.823	0.919	0.203484
479	CEP83_KAN699-1_5.tif:0002-0127	1.301	111.762	0	536	8.768	14.436	0.888	145.415	11288	1.426	0.701	0.902	1.03699
480	CEP83_KAN699-1_5.tif:0003-0142	1.829	95.831	0	894	52.941	16.204	0.773	175.302	13608	1.489	0.672	0.866	1.25012
481	CEP83_KAN699-1_5.tif:0004-0178	1.958	212.546	0	1208	69.405	20.211	0.934	416.187	32307	1.105	0.905	0.941	2.96793
482	CEP83_KAN699-1_5.tif:0005-0222	1.881	120.459	0	821	37.024	25.307	0.823	226.56	17587	1.132	0.883	0.885	1.61566
483	CEP83_KAN699-1_5.tif:0006-0297	2.164	97.851	0	490	105.862	33.551	0.762	211.771	16439	1.581	0.632	0.887	1.51019
484	CEP83_KAN699-1_5.tif:0007-0448	1.314	19.48	0	79	125.002	50.851	0.799	25.597	1987	1.719	0.582	0.876	0.182539
485	CEP83_KAN699-1_5.tif:0008-0452	1.907	147.554	0	673	80.439	51.356	0.826	281.323	21838	1.343	0.745	0.865	2.00618
486	CEP83_KAN699-1_5.tif:0009-0589	1.391	46.176	0	227	9.765	66.935	0.938	64.244	4987	1.3	0.77	0.919	0.458139
487	CEP83_KAN699-1_5.tif:0010-0627	1.34	44.269	0	136	53.826	71.158	0.974	59.31	4604	1.097	0.912	0.92	0.422954
488	CEP83_KAN699-1_5.tif:0011-0963	1.456	9.159	0	39	123.686	109.272	0.875	13.333	1035	1.254	0.797	0.866	0.0950819
489	CEP83_KAN699-1_5.tif:0012-1003	1.636	85.78	0	634	57.406	113.835	0.888	140.339	10894	1.299	0.77	0.927	1.00079
490	CEP83_KAN699-1_5.tif:0013-1033	1.443	90.625	0	537	21.618	117.263	0.863	130.755	10150	1.503	0.665	0.933	0.932446
491	CEP83_KAN699-1_5.tif:0014-1151	1.713	96.331	0	714	104.071	130.584	0.777	165.047	12812	1.521	0.657	0.881	1.17699
492	CEP83_KAN699-1_5.tif:0015-1220	1.34	23.952	0	109	11.179	138.504	0.85	32.09	2491	1.674	0.597	0.908	0.22884
493	CEP83_KAN699-1_6.tif:0001-0088	1.404	58.394	0	284	36.099	9.942	0.875	81.996	6365	1.286	0.778	0.936	0.584731
494	CEP83_KAN699-1_6.tif:0002-0227	1.507	89.137	0	551	7.366	25.786	0.928	134.349	10429	1.194	0.838	0.925	0.958077
495	CEP83_KAN699-1_6.tif:0003-0435	1.61	167.592	0	1168	53.963	49.407	0.925	269.87	20949	1.272	0.786	0.923	1.92451
496	CEP83_KAN699-1_6.tif:0004-0530	1.688	100.198	0	285	108.794	60.13	0.921	169.092	13126	1.538	0.65	0.923	1.20584
497	CEP83_KAN699-1_6.tif:0005-0531	1.649	12.508	0	43	43.345	60.312	0.885	20.624	1601	1.041	0.961	0.892	0.147078
498	CEP83_KAN699-1_6.tif:0006-0533	1.881	98.616	0	769	71.779	60.509	0.865	185.479	14398	1.536	0.651	0.927	1.32269
499	CEP83_KAN699-1_6.tif:0007-0539	1.391	106.63	0	429	13.724	61.224	0.921	148.352	11516	1.152	0.868	0.927	1.05794
500	CEP83_KAN699-1_6.tif:0008-0550	1.572	147.27	0	1024	94.465	62.494	0.997	231.455	17967	1.177	0.85	0.949	1.65057
501	CEP83_KAN699-1_6.tif:0009-0638	1.43	75.991	0	201	111.045	72.466	0.947	108.662	8435	1.286	0.777	0.937	0.774895
502	CEP83_KAN699-1_6.tif:0010-0861	1.314	22.608	0	76	43.168	97.695	0.926	29.706	2306	1.315	0.761	0.915	0.211844
503	CEP83_KAN699-1_6.tif:0011-0878	1.533	134.168	0	837	119.314	99.807	0.88	205.678	15966	1.348	0.742	0.926	1.46674
504	CEP83_KAN699-1_6.tif:0012-0909	1.739	90.748	0	729	95.823	103.203	0.949	157.82	12251	1.286	0.778	0.925	1.12546
505	CEP83_KAN699-1_6.tif:0013-0979	1.52	82.966	0	558	26.801	111.218	0.936	126.117	9790	1.277	0.783	0.944	0.899374
506	CEP83_KAN699-1_6.tif:0014-1242	1.597	220.411	0	1227	72.102	140.998	0.907	352.085	27331	1.179	0.848	0.908	2.51081
507	CEP83_KAN699-1_6.tif:0015-1264	1.301	98.416	0	562	57.599	143.523	0.778	128.05	9940	1.587	0.63	0.867	0.913154
										10885.4				1
508	CEP83_KAN699-2_1.tif:0001-0111	1.391	163.222	0	910	62.672	12.621	0.933	227.088	17628	1.169	0.855	0.96	1.61942
509	CEP83_KAN699-2_1.tif:0002-0160	1.34	91.413	0	534	88.113	18.195	0.944	122.472	9507	1.28	0.781	0.924	0.873376
510	CEP83_KAN699-2_1.tif:0003-0169	1.829	93.873	0	757	139.649	19.224	0.886	171.72	13330	1.481	0.675	0.922	1.22458
511	CEP83_KAN699-2_1.tif:0004-0342	1.378	87.196	0	628	104.625	38.808	0.941	120.191	9330	1.069	0.935	0.926	0.857115
512	CEP83_KAN699-2_1.tif:0005-0346	2.061	73.369	0	302	53.71	39.207	0.691	151.225	11739	2.024	0.494	0.816	1.07842
513	CEP83_KAN699-2_1.tif:0006-0411	1.301	81.564	0	337	6.413	46.694	0.959	106.124	8238	1.108	0.902	0.94	0.756797
514	CEP83_KAN699-2_1.tif:0007-0484	1.456	168.841	0	667	134.663	55.036	0.981	245.78	19079	1.187	0.842	0.926	1.75272
515	CEP83_KAN699-2_1.tif:0008-0499	1.494	139.388	0	593	56.918	56.61	0.909	208.293	16169	1.373	0.728	0.913	1.48539
516	CEP83_KAN699-2_1.tif:0009-0667	1.456	110.451	0	542	62.279	75.688	0.964	160.783	12481	1.291	0.775	0.954	1.14659
517	CEP83_KAN699-2_1.tif:0010-0811	2.525	28.684	0	189	101.398	92.036	0.804	72.424	5622	1.128	0.886	0.854	0.516474
518	CEP83_KAN699-2_1.tif:0011-0862	1.52	76.669	0	286	29.707	97.906	0.936	116.546	9047	1.225	0.817	0.933	0.831117
519	CEP83_KAN699-2_1.tif:0012-0941	1.52	82.085	0	566	16.516	106.838	0.873	124.777	9686	1.416	0.706	0.915	0.88982
520	CEP83_KAN699-2_1.tif:0013-1033	2.164	38.708	0	176	54.836	117.321	0.906	83.773	6503	1.256	0.796	0.921	0.597408
521	CEP83_KAN699-2_1.tif:0014-1033	1.288	65.24	0	406	3.542	117.247	0.891	84.044	6524	1.209	0.827	0.917	0.599338
522	CEP83_KAN699-2_1.tif:0015-1056	1.533	100.622	0	518	102.155	119.834	0.917	154.252	11974	1.408	0.71	0.941	1.10001
523	CEP83_KAN699-2_1.tif:0016-1077	1.301	104.851	0	612	86.398	122.286	0.917	136.423	10590	1.248	0.801	0.922	0.972867
524	CEP83_KAN699-2_1.tif:0017-1128	1.288	116.97	0	613	58.878	127.994	0.981	150.684	11697	1.208	0.827	0.939	1.07456
525	CEP83_KAN699-2_2.tif:0001-0050	1.378	104.925	0	565	2.679	5.736	0.901	144.629	11227	1.453	0.688	0.907	1.03139
526	CEP83_KAN699-2_2.tif:0002-0120	1.443	125.411	0	598	111.86	13.641	0.904	180.944	14046	1.392	0.718	0.911	1.29036
527	CEP83_KAN699-2_2.tif:0003-0421	1.507	128.026	0	951	139.667	47.786	0.866	192.963	14979	1.653	0.605	0.929	1.37607
528	CEP83_KAN699-2_2.tif:0004-0466	1.675	90.3	0	453	8.543	52.876	0.951	151.225	11739	1.329	0.752	0.929	1.07842
529	CEP83_KAN699-2_2.tif:0005-0636	1.301	138.386	0	860	50.697	72.226	0.9	180.055	13977	1.086	0.921	0.922	1.28402
530	CEP83_KAN699-2_2.tif:0006-0754	1.443	170.42	0	779	128.419	85.618	0.915	245.884	19087	1.222	0.818	0.918	1.75346
531	CEP83_KAN699-2_2.tif:0007-0889	1.327	130.689	0	714	35.397	100.913	0.842	173.408	13461	1.278	0.782	0.892	1.23662
532	CEP83_KAN699-2_2.tif:0008-1082	1.572	81.385	0	449	80.269	122.854	0.844	127.908	9929	1.506	0.664	0.891	0.912143
533	CEP83_KAN699-2_2.tif:0009-1121	1.559	78.372	0	626	61.67	127.265	0.91	122.162	9483	1.503	0.665	0.906	0.871171
534	CEP83_KAN699-2_2.tif:0010-1239	1.675	79.408	0	463	124.374	140.627	0.865	132.983	10323	1.457	0.686	0.909	0.948339
535	CEP83_KAN699-2_3.tif:0001-0089	1.765	117.854	0	736	89.56	10.081	0.897	207.997	16146	1.214	0.824	0.929	1.48328
536	CEP83_KAN699-2_3.tif:0002-0114	1.829	117.507	0	937	107.915	12.887	0.781	214.953	16686	1.39	0.719	0.885	1.53289
537	CEP83_KAN699-2_3.tif:0003-0188	1.353	121.895	0	792	71.847	21.394	0.953	164.88	12799	1.17	0.855	0.921	1.1758
538	CEP83_KAN699-2_3.tif:0004-0242	1.61	117.256	0	708	29.186	27.52	0.914	188.815	14657	1.145	0.873	0.903	1.34649
539	CEP83_KAN699-2_3.tif:0005-0479	1.353	137.533	0	1338	24.806	54.315	0.809	186.033	14441	1.682	0.595	0.894	1.32665
540	CEP83_KAN699-2_3.tif:0006-0486	1.675	114.7	0	786	66.52	55.146	0.899	192.087	14911	1.164	0.859	0.912	1.36982
541	CEP83_KAN699-2_3.tif:0007-0716	2.126	93.37	0	657	95.472	81.31	0.791	198.464	15406	1.411	0.709	0.885	1.4153
542	CEP83_KAN699-2_3.tif:0008-0848	1.623	39.746	0	296	14.882	96.307	0.911	64.514	5008	1.497	0.668	0.913	0.460068
543	CEP83_KAN699-2_3.tif:0009-0905	1.7	137.174	0	1044	68.266	102.813	0.855	233.259	18107	1.321	0.757	0.88	1.66343
544	CEP83_KAN699-2_3.tif:0010-1261	1.353	38.4	0	318	40.009	143.165	0.869	51.941	4032	1.6	0.625	0.933	0.370406
545	CEP83_KAN699-2_3.tif:0011-1264	1.327	22.922	0	120	74.507	143.481	0.906	30.415	2361	1.113	0.898	0.928	0.216897
546	CEP83_KAN699-2_4.tif:0001-0090	1.288	161.83	0	1156	22.287	10.21	0.891	208.473	16183	1.33	0.752	0.926	1.48668
547	CEP83_KAN699-2_4.tif:0002-0098	1.597	136.194	0	932	100.614	11.131	0.907	217.555	16888	1.178	0.849	0.905	1.55144
548	CEP83_KAN699-2_4.tif:0003-0321	1.378	130.57	0	577	97.541	36.447	0.859	179.978	13971	1.269	0.788	0.926	1.28347
549	CEP83_KAN699-2_4.tif:0004-0385	1.842	99.476	0	606	136.659	43.738	0.879	183.25	14225	1.3	0.77	0.92	1.3068
550	CEP83_KAN699-2_4.tif:0005-0411	1.881	77.041	0	419	67.393	46.718	0.901	144.9	11248	1.388	0.721	0.901	1.03332
551	CEP83_KAN699-2_4.tif:0006-0488	1.469	101.965	0	347	43.562	55.375	0.948	149.743	11624	1.309	0.764	0.916	1.06786
552	CEP83_KAN699-2_4.tif:0007-0535	2.37	19.364	0	103	20.392	60.747	0.857	45.899	3563	1.32	0.758	0.895	0.327321
553	CEP83_KAN699-2_4.tif:0008-0575	1.366	77.387	0	490	3.558	65.309	0.904	105.673	8203	1.545	0.647	0.938	0.753582
554	CEP83_KAN699-2_4.tif:0009-0645	1.765	97.307	0	736	79.872	73.209	0.963	171.733	13331	1.076	0.93	0.913	1.22467
555	CEP83_KAN699-2_4.tif:0010-0766	1.61	49.752	0	292	41.919	86.918	0.914	80.115	6219	1.258	0.795	0.916	0.571318
556	CEP83_KAN699-2_4.tif:0011-0831	1.636	40.055	0	227	20.572	94.234	0.836	65.532	5087	1.401	0.714	0.879	0.467325
557	CEP83_KAN699-2_4.tif:0012-0871	1.417	63.682	0	216	115.428	98.831	0.955	90.24	7005	1.216	0.822	0.924	0.643525
558	CEP83_KAN699-2_4.tif:0013-0969	1.894	16.823	0	119	8.866	110.06	0.881	31.858	2473	1.336	0.748	0.93	0.227186
559	CEP83_KAN699-2_4.tif:0014-0979	1.52	92.653	0	682	100.53	111.189	0.909	140.842	10933	1.388	0.721	0.929	1.00438
560	CEP83_KAN699-2_4.tif:0015-1069	1.327	164.913	0	932	69.09	121.29	0.878	218.818	16986	1.394	0.717	0.916	1.56045
561	CEP83_KAN699-2_5.tif:0001-0029	1.907	83.385	0	668	125.369	3.29	0.838	158.98	12341	1.119	0.894	0.873	1.13373
562	CEP83_KAN699-2_5.tif:0002-0107	1.765	108	0	709	77.796	12.114	0.888	190.606	14796	1.316	0.76	0.904	1.35926
563	CEP83_KAN699-2_5.tif:0003-0137	1.804	18.064	0	104	122.102	15.696	0.83	32.579	2529	1.364	0.733	0.9	0.232331
564	CEP83_KAN699-2_5.tif:0004-0159	1.675	78.708	0	701	42.188	17.959	0.751	131.811	10232	1.634	0.612	0.881	0.939979
565	CEP83_KAN699-2_5.tif:0005-0309	1.327	83.505	0	382	22.99	35.108	0.965	110.8	8601	1.134	0.882	0.928	0.790144
566	CEP83_KAN699-2_5.tif:0006-0369	1.636	99.063	0	689	98.915	41.907	0.878	162.072	12581	1.144	0.874	0.91	1.15577
567	CEP83_KAN699-2_5.tif:0007-0390	1.726	104.306	0	615	47.96	44.268	0.868	180.055	13977	1.384	0.723	0.902	1.28402
568	CEP83_KAN699-2_5.tif:0008-0414	1.804	82.943	0	702	66.358	46.941	0.851	149.589	11612	1.367	0.732	0.892	1.06675
569	CEP83_KAN699-2_5.tif:0009-0505	1.43	99.126	0	647	112.721	57.388	0.907	141.743	11003	1.377	0.726	0.937	1.01081
570	CEP83_KAN699-2_5.tif:0010-0602	1.7	151.538	0	1089	17.527	68.364	0.855	257.684	20003	1.335	0.749	0.88	1.83761
571	CEP83_KAN699-2_5.tif:0011-0609	1.688	31.26	0	173	118.437	69.198	0.839	52.753	4095	1.461	0.685	0.888	0.376194
572	CEP83_KAN699-2_5.tif:0012-0702	1.585	126.228	0	1110	82.705	79.64	0.885	200.01	15526	1.256	0.796	0.918	1.42632
573	CEP83_KAN699-2_5.tif:0013-0703	1.572	84.516	0	547	58.205	79.777	0.913	132.829	10311	1.334	0.75	0.953	0.947236
574	CEP83_KAN699-2_5.tif:0014-0722	1.894	89.088	0	650	141.774	81.925	0.862	168.706	13096	1.509	0.663	0.899	1.20308
575	CEP83_KAN699-2_5.tif:0015-0782	2.1	14.515	0	131	64.252	88.752	0.704	30.479	2366	2.032	0.492	0.858	0.217356
576	CEP83_KAN699-2_5.tif:0016-0988	1.469	82.456	0	370	61.135	112.165	0.932	121.093	9400	1.221	0.819	0.927	0.863546
577	CEP83_KAN699-2_5.tif:0017-1044	1.868	79.759	0	450	109.088	118.518	0.905	148.983	11565	1.182	0.846	0.909	1.06244
578	CEP83_KAN699-2_5.tif:0018-1262	1.572	57.262	0	398	106.964	143.22	0.877	89.995	6986	1.319	0.758	0.924	0.64178
579	CEP83_KAN699-2_6.tif:0001-0008	1.366	7.274	0	61	45.55	0.808	0.784	9.932	771	1.588	0.63	0.883	0.0708291
580	CEP83_KAN699-2_6.tif:0002-0043	1.494	117.379	0	662	68.966	4.841	0.883	175.405	13616	1.51	0.662	0.921	1.25086
581	CEP83_KAN699-2_6.tif:0003-0073	1.726	18.224	0	88	86.134	8.4	0.815	31.458	2442	1.274	0.785	0.865	0.224338
582	CEP83_KAN699-2_6.tif:0004-0144	1.391	124.676	0	609	56.829	16.482	0.727	173.46	13465	1.225	0.816	0.831	1.23698
583	CEP83_KAN699-2_6.tif:0005-0160	1.61	77.992	0	331	136.566	18.182	0.925	125.589	9749	1.208	0.828	0.926	0.895607
584	CEP83_KAN699-2_6.tif:0006-0218	1.481	105.113	0	770	42.983	24.767	0.969	155.721	12088	1.072	0.933	0.927	1.11048
585	CEP83_KAN699-2_6.tif:0007-0219	1.507	133.769	0	719	112.688	24.881	0.928	201.62	15651	1.056	0.947	0.925	1.4378
586	CEP83_KAN699-2_6.tif:0008-0324	1.649	179.273	0	1012	84.279	36.844	0.885	295.609	22947	1.262	0.792	0.895	2.10806
587	CEP83_KAN699-2_6.tif:0009-0389	1.417	92.155	0	470	40.502	44.23	0.926	130.587	10137	1.209	0.827	0.917	0.931251
588	CEP83_KAN699-2_6.tif:0010-0576	1.623	58.556	0	225	98.732	65.423	0.921	95.045	7378	1.057	0.946	0.916	0.677792
589	CEP83_KAN699-2_6.tif:0011-0588	1.61	170.56	0	1340	76.109	66.715	0.925	274.65	21320	1.39	0.719	0.936	1.9586
590	CEP83_KAN699-2_6.tif:0012-0597	1.417	89.464	0	403	118.701	67.783	0.967	126.774	9841	1.098	0.91	0.936	0.904059
591	CEP83_KAN699-2_6.tif:0013-0699	1.481	106.617	0	557	14.095	79.454	0.876	157.949	12261	1.538	0.65	0.924	1.12638
592	CEP83_KAN699-2_6.tif:0014-0771	1.456	66.035	0	319	2.906	87.57	0.923	96.127	7462	1.289	0.776	0.93	0.685508
593	CEP83_KAN699-2_6.tif:0015-0889	1.391	133.417	0	855	60.24	100.955	0.883	185.62	14409	1.45	0.689	0.911	1.32371
594	CEP83_KAN699-2_6.tif:0016-0889	1.7	140.197	0	897	122.759	100.852	0.949	238.399	18506	1.091	0.917	0.95	1.70008
595	CEP83_KAN699-2_6.tif:0017-0961	2.461	21.67	0	88	7.546	109.074	0.822	53.32	4139	1.148	0.871	0.91	0.380236
596	CEP83_KAN699-2_6.tif:0018-1110	1.301	84.941	0	290	114.352	126.044	0.959	110.517	8579	1.071	0.934	0.935	0.788123
597	CEP83_KAN699-2_6.tif:0019-1161	1.314	93.657	0	711	78.826	131.845	0.897	123.064	9553	1.405	0.712	0.919	0.877601
										11280.2				1.03628
598	CEP83_KAN699-3_1.tif:0001-0126	1.353	59.143	0	237	44.246	14.29	0.984	79.999	6210	1.174	0.852	0.933	0.570491
599	CEP83_KAN699-3_1.tif:0002-0288	1.417	30.764	0	90	135.228	32.749	0.926	43.594	3384	1.254	0.797	0.909	0.310876
600	CEP83_KAN699-3_1.tif:0003-0295	1.481	35.939	0	218	42.814	33.53	0.718	53.242	4133	1.948	0.513	0.852	0.379685
601	CEP83_KAN699-3_1.tif:0004-0307	1.391	13.231	0	85	5.002	34.904	0.883	18.409	1429	1.438	0.696	0.923	0.131277
602	CEP83_KAN699-3_1.tif:0005-0651	1.327	20.35	0	94	79.231	73.96	0.842	27.001	2096	1.835	0.545	0.904	0.192552
603	CEP83_KAN699-3_2.tif:0001-0019	1.481	28.365	0	120	113.258	2.131	0.94	42.022	3262	1.046	0.956	0.92	0.299669
604	CEP83_KAN699-3_2.tif:0002-0128	1.456	57.726	0	197	22.096	14.519	0.964	84.031	6523	1.183	0.845	0.942	0.599246
605	CEP83_KAN699-3_2.tif:0003-0184	1.662	44.194	0	175	33.039	20.986	0.845	73.442	5701	1.488	0.672	0.918	0.523731
606	CEP83_KAN699-3_2.tif:0004-0214	1.533	57.16	0	191	111.857	24.366	0.906	87.625	6802	1.465	0.683	0.922	0.624876
607	CEP83_KAN699-3_2.tif:0005-0231	1.288	40.28	0	174	130.628	26.285	0.907	51.89	4028	1.305	0.766	0.917	0.370039
608	CEP83_KAN699-3_2.tif:0006-0249	1.597	13.669	0	75	18.317	28.28	0.834	21.835	1695	1.643	0.609	0.915	0.155714
609	CEP83_KAN699-3_2.tif:0007-0298	1.391	28.648	0	126	66.118	33.858	0.938	39.858	3094	1.179	0.848	0.919	0.284235
610	CEP83_KAN699-3_2.tif:0008-0393	1.507	47.308	0	235	103.115	44.641	0.956	71.303	5535	1.031	0.97	0.932	0.508482
611	CEP83_KAN699-3_2.tif:0009-0512	1.533	26.294	0	111	115.351	58.174	0.771	40.309	3129	1.809	0.553	0.888	0.287451
612	CEP83_KAN699-3_2.tif:0010-0594	1.378	50.72	0	214	127.029	67.458	0.953	69.912	5427	1.192	0.839	0.96	0.49856
613	CEP83_KAN699-3_2.tif:0011-0785	1.327	44.194	0	145	33.298	89.155	0.935	58.64	4552	1.365	0.732	0.932	0.418177
614	CEP83_KAN699-3_2.tif:0012-0835	1.507	19.872	0	72	120.334	94.851	0.891	29.951	2325	1.267	0.789	0.907	0.21359
615	CEP83_KAN699-3_2.tif:0013-0921	1.494	31.586	0	168	99.245	104.507	0.909	47.201	3664	1.329	0.752	0.913	0.336599
616	CEP83_KAN699-3_2.tif:0014-0980	1.417	30.582	0	123	128.512	111.237	0.926	43.336	3364	1.298	0.77	0.917	0.309039
617	CEP83_KAN699-3_2.tif:0015-1074	1.443	59.598	0	335	94.737	121.959	0.932	85.989	6675	1.317	0.759	0.911	0.613209
618	CEP83_KAN699-3_2.tif:0016-1194	1.353	32.962	0	133	88.755	135.486	0.858	44.585	3461	1.627	0.615	0.905	0.31795
619	CEP83_KAN699-3_3.tif:0001-0052	1.469	47.711	0	160	95.739	5.979	0.96	70.067	5439	1.241	0.806	0.934	0.499662
620	CEP83_KAN699-3_3.tif:0002-0105	2.023	44.822	0	235	35.876	11.937	0.818	90.652	7037	1.282	0.78	0.88	0.646465
621	CEP83_KAN699-3_3.tif:0003-0439	1.816	63.149	0	261	63.262	49.845	0.858	114.704	8904	1.403	0.713	0.919	0.81798
622	CEP83_KAN699-3_3.tif:0004-0460	1.533	22.101	0	153	88.83	52.26	0.933	33.88	2630	1.111	0.9	0.908	0.241609
623	CEP83_KAN699-3_3.tif:0005-0532	1.778	38.391	0	139	122.271	60.463	0.786	68.25	5298	1.849	0.541	0.917	0.486709
624	CEP83_KAN699-3_3.tif:0006-0615	1.43	24.153	0	99	33.614	69.828	0.896	34.537	2681	1.33	0.752	0.899	0.246294
625	CEP83_KAN699-3_3.tif:0007-1153	1.739	46.652	0	188	103.535	130.933	0.898	81.132	6298	1.563	0.64	0.915	0.578576
626	CEP83_KAN699-3_4.tif:0001-0019	1.469	24.868	0	123	134.723	2.163	0.893	36.521	2835	1.403	0.713	0.908	0.260442
627	CEP83_KAN699-3_4.tif:0002-0115	1.726	53.47	0	212	51.786	13.169	0.927	92.301	7165	1.359	0.736	0.934	0.658224
628	CEP83_KAN699-3_4.tif:0003-0136	1.366	20.925	0	112	77.386	15.562	0.904	28.573	2218	1.107	0.903	0.926	0.20376
629	CEP83_KAN699-3_4.tif:0004-0202	1.456	40.062	0	272	41.526	22.944	0.923	58.318	4527	1.122	0.891	0.922	0.41588
630	CEP83_KAN699-3_4.tif:0005-0209	1.765	40.197	0	167	110.831	23.797	0.83	70.943	5507	1.894	0.528	0.958	0.505909
631	CEP83_KAN699-3_4.tif:0006-0291	1.533	34.471	0	114	22.159	33.13	0.917	52.843	4102	1.304	0.767	0.941	0.376837
632	CEP83_KAN699-3_4.tif:0007-0525	1.417	34.1	0	139	93.22	59.568	0.899	48.321	3751	1.329	0.753	0.917	0.344592
633	CEP83_KAN699-3_4.tif:0008-0831	1.791	57.799	0	220	92.106	94.315	0.891	103.496	8034	1.56	0.641	0.917	0.738056
634	CEP83_KAN699-3_4.tif:0009-1028	1.404	20.817	0	61	52.789	116.759	0.918	29.23	2269	1.27	0.787	0.912	0.208445
635	CEP83_KAN699-3_4.tif:0010-1160	1.481	32.304	0	142	99.732	131.709	0.886	47.858	3715	1.536	0.651	0.939	0.341284
636	CEP83_KAN699-3_5.tif:0001-0113	1.855	8.007	0	39	90.003	12.92	0.693	14.853	1153	1.311	0.763	0.798	0.105922
637	CEP83_KAN699-3_5.tif:0002-0255	1.559	26.099	0	131	103.696	28.996	0.837	40.682	3158	1.958	0.511	0.917	0.290115
638	CEP83_KAN699-3_5.tif:0003-0305	1.353	27.21	0	141	7.89	34.615	0.869	36.805	2857	1.538	0.65	0.933	0.262463
639	CEP83_KAN699-3_5.tif:0004-0478	1.314	39.461	0	185	144.092	54.331	0.938	51.851	4025	1.035	0.966	0.936	0.369763
640	CEP83_KAN699-3_5.tif:0005-0504	1.301	24.554	0	130	108.875	57.303	0.99	31.948	2480	1.176	0.85	0.94	0.227829
641	CEP83_KAN699-3_5.tif:0006-0734	1.585	18.146	0	99	122.992	83.304	0.828	28.753	2232	1.71	0.585	0.914	0.205046
642	CEP83_KAN699-3_5.tif:0007-0897	1.353	22.514	0	120	6.695	101.767	0.941	30.454	2364	1.433	0.698	0.913	0.217173
643	CEP83_KAN699-3_5.tif:0008-0942	1.456	44.398	0	224	56.394	106.947	0.871	64.63	5017	1.437	0.696	0.922	0.460895
644	CEP83_KAN699-3_6.tif:0001-0049	1.391	16.954	0	152	20.64	5.755	0.738	23.587	1831	1.291	0.774	0.815	0.168208
645	CEP83_KAN699-3_6.tif:0002-0214	1.288	50.11	0	148	56.884	24.298	0.949	64.553	5011	1.183	0.845	0.935	0.460343
646	CEP83_KAN699-3_6.tif:0003-0237	1.507	23.35	0	96	20.671	26.916	0.985	35.194	2732	1.206	0.829	0.936	0.250979
647	CEP83_KAN699-3_6.tif:0004-0292	1.314	14.039	0	179	142.553	33.135	0.926	18.447	1432	1.367	0.732	0.932	0.131553
648	CEP83_KAN699-3_6.tif:0005-0315	1.533	25.168	0	181	89.715	35.882	0.906	38.582	2995	1.441	0.694	0.93	0.27514
649	CEP83_KAN699-3_6.tif:0006-0419	1.288	45.74	0	233	65.337	47.628	0.949	58.923	4574	1.146	0.873	0.93	0.420198
650	CEP83_KAN699-3_6.tif:0007-0482	1.417	30.809	0	151	101.917	54.718	0.955	43.658	3389	1.067	0.937	0.913	0.311336
651	CEP83_KAN699-3_6.tif:0008-0506	3.195	7.427	0	71	36.509	57.461	0.661	23.729	1842	1.784	0.561	0.805	0.169218
652	CEP83_KAN699-3_6.tif:0009-0584	1.597	12.056	0	94	117.55	66.346	0.882	19.259	1495	1.221	0.819	0.912	0.137341
653	CEP83_KAN699-3_6.tif:0010-0639	1.391	20.722	0	113	131.749	72.535	0.883	28.83	2238	1.506	0.664	0.904	0.205597
654	CEP83_KAN699-3_6.tif:0011-0885	1.778	79.029	0	373	75.029	100.469	0.677	140.494	10906	1.679	0.596	0.834	1.0019
655	CEP83_KAN699-3_6.tif:0012-1028	1.34	48.221	0	399	121.561	116.761	0.887	64.604	5015	1.234	0.81	0.924	0.460711
656	CEP83_KAN699-3_6.tif:0013-1084	1.713	46.421	0	205	138.144	123.089	0.862	79.535	6174	1.519	0.658	0.905	0.567184
657	CEP83_KAN699-3_6.tif:0014-1252	1.391	14.361	0	85	82.945	142.116	0.95	19.98	1551	1.41	0.709	0.947	0.142485
										4056.17				0.372626
658	CEP83_KAN699-4_1.tif:0001-0012	2.293	20.702	0	108	127.842	1.432	0.848	47.471	3685	1.205	0.83	0.873	0.338528
659	CEP83_KAN699-4_1.tif:0002-0031	1.314	64.882	0	311	135.979	3.524	0.897	85.255	6618	1.178	0.849	0.919	0.607973
660	CEP83_KAN699-4_1.tif:0003-0136	1.353	42.314	0	182	28.243	15.469	0.896	57.236	4443	1.227	0.815	0.917	0.408163
661	CEP83_KAN699-4_1.tif:0004-0148	1.366	47.906	0	394	116.678	16.773	0.893	65.416	5078	1.249	0.8	0.906	0.466498
662	CEP83_KAN699-4_1.tif:0005-0186	1.34	24.981	0	134	51.727	21.181	0.876	33.468	2598	1.606	0.623	0.92	0.238669
663	CEP83_KAN699-4_1.tif:0006-0266	1.572	73.803	0	368	71.346	30.264	0.853	115.992	9004	1.257	0.796	0.917	0.827167
664	CEP83_KAN699-4_1.tif:0007-0557	1.43	38.027	0	346	23.075	63.145	0.821	54.376	4221	1.509	0.663	0.902	0.387769
665	CEP83_KAN699-4_1.tif:0008-0564	1.572	86.361	0	384	114.213	64.114	0.929	135.727	10536	1.234	0.811	0.928	0.967906
666	CEP83_KAN699-4_1.tif:0009-0800	1.997	84.419	0	517	86.371	90.76	0.781	168.564	13085	1.254	0.797	0.845	1.20207
667	CEP83_KAN699-4_1.tif:0010-0806	1.353	43.305	0	293	49.368	91.486	0.935	58.576	4547	1.25	0.8	0.946	0.417717
668	CEP83_KAN699-4_1.tif:0011-0807	1.675	59.346	0	265	129.053	91.533	0.82	99.387	7715	1.521	0.657	0.875	0.708751
669	CEP83_KAN699-4_1.tif:0012-1155	1.288	40.76	0	261	110.434	131.104	0.919	52.508	4076	1.277	0.783	0.93	0.374448
670	CEP83_KAN699-4_1.tif:0013-1160	1.404	43.615	0	342	50.529	131.642	0.959	61.242	4754	1.116	0.896	0.932	0.436734
671	CEP83_KAN699-4_1.tif:0014-1233	1.984	8.143	0	39	109.096	139.939	0.83	16.154	1254	1.585	0.631	0.903	0.115201
672	CEP83_KAN699-4_2.tif:0001-0085	2.435	28.534	0	136	11.073	9.705	0.921	69.474	5393	1.051	0.952	0.909	0.495436
673	CEP83_KAN699-4_2.tif:0002-0144	1.301	44.535	0	252	125.254	16.393	0.9	57.944	4498	1.032	0.969	0.927	0.413216
674	CEP83_KAN699-4_2.tif:0003-0238	1.34	72.26	0	337	38.689	27.003	0.956	96.81	7515	1.209	0.827	0.941	0.690377
675	CEP83_KAN699-4_2.tif:0004-0311	1.945	28.265	0	181	27.146	35.288	0.814	54.981	4268	1.647	0.607	0.886	0.392087
676	CEP83_KAN699-4_2.tif:0005-0391	1.546	70.883	0	397	125.672	44.382	0.929	109.576	8506	1.274	0.785	0.909	0.781417
677	CEP83_KAN699-4_2.tif:0006-0403	1.378	68.252	0	507	83.507	45.826	0.929	94.079	7303	1.361	0.735	0.911	0.670902
678	CEP83_KAN699-4_2.tif:0007-0561	1.481	60.035	0	438	85.425	63.716	0.94	88.939	6904	1.278	0.783	0.939	0.634247
679	CEP83_KAN699-4_2.tif:0008-0637	1.327	59.233	0	310	48.715	72.315	0.965	78.595	6101	1.249	0.801	0.916	0.560478
680	CEP83_KAN699-4_2.tif:0009-0720	1.481	67.217	0	368	130.883	81.773	0.886	99.58	7730	1.077	0.929	0.92	0.710129
681	CEP83_KAN699-4_2.tif:0010-0768	1.585	37.285	0	196	30.819	87.251	0.952	59.078	4586	1.058	0.945	0.898	0.4213
682	CEP83_KAN699-4_2.tif:0011-0861	1.288	74.63	0	380	50.657	97.787	0.981	96.14	7463	1.047	0.955	0.93	0.6856
683	CEP83_KAN699-4_2.tif:0012-0944	1.378	63.729	0	376	78.453	107.141	0.913	87.844	6819	1.374	0.728	0.926	0.626438
684	CEP83_KAN699-4_2.tif:0013-1087	2.138	21.855	0	133	95.463	123.458	0.853	46.737	3628	1.145	0.873	0.895	0.333292
685	CEP83_KAN699-4_2.tif:0014-1152	1.559	87.57	0	485	84.363	130.66	0.772	136.5	10596	1.67	0.599	0.886	0.973418
686	CEP83_KAN699-4_3.tif:0001-0085	1.366	31.387	0	326	88.846	9.613	0.975	42.859	3327	1.219	0.82	0.955	0.30564
687	CEP83_KAN699-4_3.tif:0002-0135	1.43	30.973	0	491	27.829	15.399	0.935	44.289	3438	1.294	0.773	0.917	0.315837
688	CEP83_KAN699-4_3.tif:0003-0270	1.546	38.708	0	277	128.825	30.619	0.941	59.838	4645	1.239	0.807	0.927	0.42672
689	CEP83_KAN699-4_3.tif:0004-0428	2.19	19.788	0	225	23.581	48.615	0.907	43.336	3364	1.143	0.875	0.899	0.309039
690	CEP83_KAN699-4_3.tif:0005-0505	1.404	83.211	0	437	30.45	57.327	0.902	116.842	9070	1.088	0.919	0.932	0.83323
691	CEP83_KAN699-4_3.tif:0006-0710	1.546	65.967	0	471	137.158	80.549	0.888	101.976	7916	1.543	0.648	0.923	0.727216
692	CEP83_KAN699-4_3.tif:0007-0763	1.61	73.304	0	377	47.011	86.656	0.874	118.04	9163	1.354	0.738	0.923	0.841773
693	CEP83_KAN699-4_3.tif:0008-1060	1.288	17.27	0	100	12.054	120.312	0.919	22.248	1727	1.37	0.73	0.939	0.158654
694	CEP83_KAN699-4_4.tif:0001-0168	1.585	42.154	0	174	94.701	19.073	0.936	66.794	5185	1.143	0.875	0.925	0.476328
695	CEP83_KAN699-4_4.tif:0002-0196	1.778	27.833	0	184	56.669	22.295	0.884	49.481	3841	1.613	0.62	0.911	0.35286
696	CEP83_KAN699-4_4.tif:0003-0436	1.481	17.13	0	65	112.807	49.418	0.876	25.378	1970	1.457	0.686	0.913	0.180977
697	CEP83_KAN699-4_4.tif:0004-0631	1.919	43.711	0	270	92.07	71.527	0.861	83.902	6513	1.297	0.771	0.911	0.598327
698	CEP83_KAN699-4_4.tif:0005-0648	1.649	17.914	0	108	37.882	73.546	0.732	29.539	2293	2.128	0.47	0.871	0.21065
699	CEP83_KAN699-4_4.tif:0006-0685	1.404	33.009	0	192	65.345	77.73	0.865	46.35	3598	1.594	0.628	0.92	0.330536
700	CEP83_KAN699-4_5.tif:0001-0008	1.301	136.693	0	728	94.791	0.94	0.959	177.852	13806	1.177	0.85	0.944	1.26831
701	CEP83_KAN699-4_5.tif:0002-0029	1.353	57.752	0	371	40.038	3.323	0.953	78.118	6064	1.218	0.821	0.933	0.557079
702	CEP83_KAN699-4_5.tif:0003-0059	3.118	28.545	0	128	71.01	6.863	0.801	88.991	6908	1.311	0.763	0.885	0.634614
703	CEP83_KAN699-4_5.tif:0004-0111	1.391	42.694	0	148	29.601	12.615	0.846	59.4	4611	1.551	0.645	0.896	0.423597
704	CEP83_KAN699-4_5.tif:0005-0213	1.572	89.385	0	418	86.752	24.154	0.985	140.481	10905	1.259	0.794	0.935	1.00181
705	CEP83_KAN699-4_5.tif:0006-0233	1.469	89.904	0	292	52.583	26.481	0.948	132.03	10249	1.089	0.918	0.916	0.941541
706	CEP83_KAN699-4_5.tif:0007-0330	1.52	62.89	0	549	131.099	37.505	0.849	95.599	7421	1.413	0.708	0.887	0.681742
707	CEP83_KAN699-4_5.tif:0008-0606	1.649	70.633	0	508	24.577	68.842	0.91	116.468	9041	1.248	0.801	0.911	0.830566
708	CEP83_KAN699-4_5.tif:0009-0606	1.533	103.378	0	825	95.86	68.858	0.961	158.477	12302	1.051	0.952	0.919	1.13014
709	CEP83_KAN699-4_5.tif:0010-0644	1.43	42.847	0	122	140.626	73.081	0.881	61.268	4756	1.586	0.631	0.921	0.436917
710	CEP83_KAN699-4_5.tif:0011-0796	1.481	34.026	0	165	20.417	90.443	0.795	50.408	3913	1.98	0.505	0.902	0.359474
711	CEP83_KAN699-4_5.tif:0012-0949	1.43	75.577	0	320	70.623	107.735	0.881	108.069	8389	1.496	0.669	0.917	0.770669
712	CEP83_KAN699-4_5.tif:0013-1030	1.456	53.345	0	274	116.057	116.908	0.86	77.654	6028	1.598	0.626	0.904	0.553772
713	CEP83_KAN699-4_6.tif:0001-0152	1.829	104.127	0	713	51.103	17.317	0.792	190.477	14786	1.401	0.714	0.861	1.35834
714	CEP83_KAN699-4_6.tif:0002-0157	1.61	79.536	0	347	141.194	17.721	0.851	128.075	9942	1.241	0.806	0.926	0.913338
715	CEP83_KAN699-4_6.tif:0003-0434	1.391	62.111	0	232	21.416	49.247	0.921	86.414	6708	1.321	0.757	0.935	0.616241
716	CEP83_KAN699-4_6.tif:0004-0543	2.422	9.691	0	58	110.567	61.599	0.947	23.471	1822	1.363	0.733	0.933	0.167381
717	CEP83_KAN699-4_6.tif:0005-0692	2.074	21.441	0	206	128.177	78.522	0.902	44.47	3452	1.118	0.894	0.907	0.317123
718	CEP83_KAN699-4_6.tif:0006-0756	1.868	40.917	0	352	93.382	85.822	0.86	76.43	5933	1.489	0.672	0.903	0.545044
719	CEP83_KAN699-4_6.tif:0007-0777	1.52	31.72	0	147	115.592	88.207	0.773	48.218	3743	1.57	0.637	0.894	0.343857
720	CEP83_KAN699-4_6.tif:0008-1219	1.559	32.281	0	220	60.729	138.378	0.86	50.318	3906	1.421	0.704	0.89	0.358831
										6248.56				0.574033
721	CEP83_KAN699-5_1.tif:0001-0020	1.739	106.541	0	756	121.16	2.266	0.884	185.285	14383	1.148	0.871	0.912	1.32132
722	CEP83_KAN699-5_1.tif:0002-0076	1.662	46.093	0	325	64.91	8.705	0.932	76.598	5946	1.058	0.945	0.893	0.546239
723	CEP83_KAN699-5_1.tif:0003-0396	1.378	72.551	0	272	10.377	44.989	0.929	100.005	7763	1.272	0.786	0.915	0.71316
724	CEP83_KAN699-5_1.tif:0004-0433	1.52	71.568	0	253	48.972	49.109	0.953	108.791	8445	1.338	0.748	0.933	0.775813
725	CEP83_KAN699-5_1.tif:0005-0593	1.752	126.441	0	462	101.25	67.335	0.827	221.523	17196	1.561	0.64	0.901	1.57974
726	CEP83_KAN699-5_1.tif:0006-0649	1.391	61.111	0	174	68.394	73.659	0.921	85.023	6600	1.156	0.865	0.923	0.606319
727	CEP83_KAN699-5_1.tif:0007-0755	1.778	137.906	0	974	144.073	85.73	0.839	245.162	19031	1.556	0.643	0.893	1.74831
728	CEP83_KAN699-5_1.tif:0008-0765	2.023	67.561	0	362	2.633	86.738	0.867	136.642	10607	1.385	0.722	0.9	0.974429
729	CEP83_KAN699-5_1.tif:0009-0893	1.546	100.775	0	421	53.148	101.369	0.888	155.785	12093	1.399	0.715	0.923	1.11094
730	CEP83_KAN699-5_1.tif:0010-1016	1.597	141	0	560	81.129	115.348	0.867	225.233	17484	1.475	0.678	0.936	1.6062
731	CEP83_KAN699-5_1.tif:0011-1067	1.546	118.567	0	655	118.973	121.116	0.941	183.289	14228	1.286	0.778	0.927	1.30708
732	CEP83_KAN699-5_2.tif:0001-0017	1.778	60.87	0	208	116.869	1.962	0.944	108.211	8400	1.374	0.728	0.932	0.771679
733	CEP83_KAN699-5_2.tif:0002-0049	1.494	223.328	0	1464	127.527	5.588	0.894	333.728	25906	1.25	0.8	0.921	2.3799
734	CEP83_KAN699-5_2.tif:0003-0224	1.649	106.352	0	361	64.261	25.453	0.838	175.366	13613	1.538	0.65	0.911	1.25058
735	CEP83_KAN699-5_2.tif:0004-0406	1.443	99.536	0	423	131.057	46.121	0.943	143.611	11148	1.177	0.85	0.914	1.02413
736	CEP83_KAN699-5_2.tif:0005-0449	1.688	170.977	0	1497	101.111	50.927	0.872	288.537	22398	1.343	0.745	0.903	2.05763
737	CEP83_KAN699-5_2.tif:0006-0500	1.443	175.384	0	1146	76.519	56.751	0.943	253.046	19643	1.107	0.903	0.914	1.80454
738	CEP83_KAN699-5_2.tif:0007-0537	1.597	82.306	0	348	122.772	61.011	0.892	131.476	10206	1.323	0.756	0.932	0.93759
739	CEP83_KAN699-5_2.tif:0008-0858	1.984	102.214	0	682	81.07	97.404	0.791	202.78	15741	1.815	0.551	0.895	1.44607
740	CEP83_KAN699-5_2.tif:0009-0910	1.469	106.105	0	646	84.77	103.284	0.878	155.824	12096	1.288	0.777	0.923	1.11122
741	CEP83_KAN699-5_2.tif:0010-1109	1.481	102.739	0	404	66.638	125.903	0.969	152.204	11815	1.273	0.785	0.947	1.0854
742	CEP83_KAN699-5_2.tif:0011-1210	1.314	76.216	0	359	126.184	137.391	0.938	100.147	7774	1.405	0.712	0.953	0.714171
743	CEP83_KAN699-5_2.tif:0012-1252	1.443	93.768	0	469	100.658	142.171	0.985	135.289	10502	1.112	0.899	0.941	0.964783
744	CEP83_KAN699-5_3.tif:0001-0201	1.481	172.513	0	692	33.347	22.882	0.912	255.571	19839	1.304	0.767	0.927	1.82254
745	CEP83_KAN699-5_3.tif:0002-0379	2.035	131.791	0	1204	61.103	43.03	0.895	268.247	20823	1.303	0.768	0.913	1.91294
746	CEP83_KAN699-5_3.tif:0003-0598	1.494	119.267	0	891	22.312	67.867	0.932	178.226	13835	1.323	0.756	0.959	1.27097
747	CEP83_KAN699-5_3.tif:0004-0602	1.507	144.222	0	921	116.917	68.337	0.901	217.375	16874	1.184	0.845	0.925	1.55016
748	CEP83_KAN699-5_3.tif:0005-0757	1.301	73.01	0	212	73.408	85.967	0.917	94.994	7374	1.153	0.867	0.91	0.677424
749	CEP83_KAN699-5_3.tif:0006-0784	1.314	32.118	0	113	44.77	89.04	0.897	42.202	3276	1.528	0.654	0.932	0.300955
750	CEP83_KAN699-5_3.tif:0007-0831	1.713	119.992	0	1152	102.825	94.277	0.93	205.588	15959	1.094	0.914	0.943	1.4661
751	CEP83_KAN699-5_3.tif:0008-0842	1.469	106.746	0	628	132.609	95.601	0.904	156.764	12169	1.091	0.916	0.919	1.11792
752	CEP83_KAN699-5_3.tif:0009-0890	1.417	108.127	0	585	6.281	101.047	0.938	153.222	11894	1.408	0.71	0.944	1.09266
753	CEP83_KAN699-5_3.tif:0010-0932	1.894	28.918	0	141	42.903	105.856	0.952	54.762	4251	1.194	0.838	0.933	0.390525
754	CEP83_KAN699-5_3.tif:0011-1012	1.366	60.5	0	344	42.388	114.888	0.993	82.614	6413	1.174	0.851	0.934	0.58914
755	CEP83_KAN699-5_4.tif:0001-0127	1.752	104.368	0	756	46.986	14.479	0.895	182.851	14194	1.294	0.773	0.892	1.30395
756	CEP83_KAN699-5_4.tif:0002-0138	1.945	32.854	0	139	53.83	15.665	0.918	63.909	4961	1.41	0.709	0.926	0.45575
757	CEP83_KAN699-5_4.tif:0003-0144	1.353	86.124	0	638	3.43	16.355	0.953	116.494	9043	1.093	0.915	0.921	0.830749
758	CEP83_KAN699-5_4.tif:0004-0149	1.881	127.685	0	785	122.441	16.998	0.897	240.151	18642	1.569	0.637	0.945	1.71258
759	CEP83_KAN699-5_4.tif:0005-0336	1.52	107.008	0	716	35.244	38.125	0.953	162.664	12627	1.3	0.769	0.922	1.16
760	CEP83_KAN699-5_4.tif:0006-0412	1.636	28.992	0	158	16.792	46.779	0.929	47.432	3682	1.275	0.785	0.914	0.338253
761	CEP83_KAN699-5_4.tif:0007-0438	1.688	170.71	0	1260	79.232	49.732	0.906	288.086	22363	1.169	0.855	0.916	2.05441
762	CEP83_KAN699-5_4.tif:0008-0472	1.675	145.408	0	1133	122.219	53.523	0.875	243.513	18903	1.514	0.66	0.925	1.73655
763	CEP83_KAN699-5_4.tif:0009-0636	1.675	169.923	0	968	127.768	72.221	0.829	284.569	22090	1.641	0.61	0.915	2.02933
764	CEP83_KAN699-5_4.tif:0010-0663	1.43	89.838	0	565	74.521	75.254	0.923	128.462	9972	1.207	0.828	0.91	0.916094
765	CEP83_KAN699-5_4.tif:0011-0685	1.533	52.218	0	231	44.274	77.752	0.88	80.05	6214	1.447	0.691	0.908	0.570859
766	CEP83_KAN699-5_4.tif:0012-0726	1.494	102.112	0	629	125.455	82.467	0.948	152.59	11845	1.36	0.735	0.932	1.08816
767	CEP83_KAN699-5_4.tif:0013-0731	1.752	135.64	0	763	75.448	83.006	0.905	237.639	18447	1.24	0.807	0.916	1.69466
768	CEP83_KAN699-5_4.tif:0014-0890	2.628	18.181	0	148	1.13	100.924	0.881	47.78	3709	1.447	0.691	0.929	0.340733
769	CEP83_KAN699-5_4.tif:0015-0890	1.507	160.034	0	879	127.472	101.064	0.917	241.207	18724	1.288	0.776	0.918	1.72011
770	CEP83_KAN699-5_4.tif:0016-0896	1.61	25.432	0	112	61.731	101.721	0.98	40.953	3179	1.097	0.912	0.936	0.292044
771	CEP83_KAN699-5_4.tif:0017-0947	1.34	106.712	0	552	22.662	107.578	0.898	142.967	11098	1.049	0.953	0.933	1.01954
772	CEP83_KAN699-5_5.tif:0001-0027	1.585	107.878	0	781	128.762	3.019	0.899	170.935	13269	1.298	0.77	0.904	1.21898
773	CEP83_KAN699-5_5.tif:0002-0075	1.469	63.605	0	213	95.491	8.565	0.96	93.409	7251	1.182	0.846	0.938	0.666125
774	CEP83_KAN699-5_5.tif:0003-0158	1.481	116.043	0	633	84.77	17.995	0.912	171.914	13345	1.343	0.745	0.935	1.22596
775	CEP83_KAN699-5_5.tif:0004-0159	1.469	160.07	0	949	91.953	18.055	0.932	235.075	18248	1.089	0.918	0.916	1.67638
776	CEP83_KAN699-5_5.tif:0005-0251	2.035	132.297	0	617	48.881	28.537	0.812	269.278	20903	1.755	0.57	0.924	1.92029
777	CEP83_KAN699-5_5.tif:0006-0279	1.662	98.419	0	432	20.704	31.72	0.868	163.553	12696	1.297	0.771	0.915	1.16634
778	CEP83_KAN699-5_5.tif:0007-0411	1.52	118.127	0	754	15.362	46.697	0.925	179.566	13939	1.142	0.876	0.911	1.28053
779	CEP83_KAN699-5_5.tif:0008-0457	1.649	152.633	0	638	98.268	51.864	0.947	251.681	19537	1.251	0.8	0.934	1.7948
780	CEP83_KAN699-5_5.tif:0009-0480	2.061	102.169	0	537	131.111	54.553	0.803	210.586	16347	1.67	0.599	0.917	1.50174
781	CEP83_KAN699-5_5.tif:0010-0501	1.353	24.943	0	102	5.593	56.854	0.896	33.739	2619	1.362	0.734	0.917	0.240599
782	CEP83_KAN699-5_5.tif:0011-0662	1.829	74	0	727	139.294	75.277	0.713	135.367	10508	1.435	0.697	0.853	0.965334
783	CEP83_KAN699-5_5.tif:0012-0783	1.726	112.403	0	793	43.064	88.833	0.868	194.032	15062	1.414	0.707	0.912	1.38369
784	CEP83_KAN699-5_5.tif:0013-0967	1.585	119.472	0	438	143.8	109.819	0.885	189.305	14695	1.094	0.914	0.921	1.34998
785	CEP83_KAN699-5_5.tif:0014-1021	1.662	126.442	0	915	92.432	115.959	0.836	210.122	16311	1.531	0.653	0.915	1.49844
786	CEP83_KAN699-5_5.tif:0015-1169	1.507	149.427	0	710	70.817	132.687	0.866	225.22	17483	1.365	0.732	0.914	1.6061
787	CEP83_KAN699-5_6.tif:0001-0083	1.688	75	0	556	93.172	9.521	0.872	126.568	9825	1.352	0.74	0.891	0.902589
788	CEP83_KAN699-5_6.tif:0002-0167	1.752	59.551	0	203	115.339	19.023	0.748	104.333	8099	2.002	0.499	0.88	0.744027
789	CEP83_KAN699-5_6.tif:0003-0199	1.726	122.776	0	753	63.555	22.623	0.927	211.939	16452	1.065	0.939	0.934	1.51139
790	CEP83_KAN699-5_6.tif:0004-0328	1.597	21.645	0	106	15.058	37.239	0.816	34.576	2684	1.671	0.599	0.87	0.24657
791	CEP83_KAN699-5_6.tif:0005-0389	1.52	122.11	0	709	87.38	44.208	0.936	185.62	14409	1.12	0.893	0.933	1.32371
792	CEP83_KAN699-5_6.tif:0006-0438	2.332	28.713	0	146	121.504	49.683	0.843	66.949	5197	1.121	0.892	0.885	0.477431
793	CEP83_KAN699-5_6.tif:0007-0449	1.791	162.36	0	898	109.614	51.046	0.925	290.727	22568	1.296	0.771	0.921	2.07324
794	CEP83_KAN699-5_6.tif:0008-0496	1.404	85.743	0	426	15.964	56.34	0.976	120.398	9346	1.23	0.813	0.92	0.858585
795	CEP83_KAN699-5_6.tif:0009-0557	1.52	82.5	0	443	63.048	63.309	0.909	125.409	9735	1.38	0.725	0.937	0.894321
796	CEP83_KAN699-5_6.tif:0010-0623	2.138	38.229	0	217	97.237	70.697	0.917	81.751	6346	1.182	0.846	0.92	0.582985
797	CEP83_KAN699-5_6.tif:0011-0631	1.314	71.853	0	255	77.73	71.59	0.938	94.414	7329	1.164	0.859	0.94	0.67329
798	CEP83_KAN699-5_6.tif:0012-0654	1.919	38.436	0	273	35.671	74.272	0.93	73.777	5727	1.154	0.866	0.925	0.52612
799	CEP83_KAN699-5_6.tif:0013-0762	2.332	29.967	0	188	74.972	86.601	0.799	69.873	5424	1.461	0.684	0.874	0.498284
800	CEP83_KAN699-5_6.tif:0014-0803	1.391	134.528	0	1024	48.887	91.126	0.98	187.166	14529	1.207	0.829	0.943	1.33473
801	CEP83_KAN699-5_6.tif:0015-0848	1.572	96.033	0	659	102.496	96.249	0.968	150.928	11716	1.368	0.731	0.953	1.07631
802	CEP83_KAN699-5_6.tif:0016-0908	1.559	104.273	0	532	123.096	103.149	0.87	162.535	12617	1.253	0.798	0.92	1.15908
803	CEP83_KAN699-5_6.tif:0017-1105	1.353	93.048	0	498	91.963	125.439	0.953	125.86	9770	1.19	0.84	0.921	0.897536
804	CEP83_KAN699-5_6.tif:0018-1163	1.494	99.44	0	710	117.748	132.092	0.883	148.597	11535	1.268	0.789	0.917	1.05968
										12003.1				1.10269
805	CEP83_KAN699-6_1.tif:0001-0064	1.456	100.168	0	681	79.955	7.203	0.871	145.814	11319	1.524	0.656	0.934	1.03984
806	CEP83_KAN699-6_1.tif:0002-0184	1.597	136.387	0	1033	47.899	20.88	0.892	217.865	16912	1.143	0.875	0.929	1.55365
807	CEP83_KAN699-6_1.tif:0003-0187	1.675	132.585	0	658	126.574	21.208	0.865	222.038	17236	1.486	0.673	0.893	1.58341
808	CEP83_KAN699-6_1.tif:0004-0314	1.778	80.275	0	501	30.404	35.56	0.751	142.71	11078	1.576	0.634	0.854	1.0177
809	CEP83_KAN699-6_1.tif:0005-0466	1.636	109.598	0	772	132.414	52.903	0.855	179.308	13919	1.618	0.618	0.907	1.27869
810	CEP83_KAN699-6_1.tif:0006-0470	1.829	111.155	0	1125	98.115	53.373	0.864	203.333	15784	1.191	0.84	0.879	1.45002
811	CEP83_KAN699-6_1.tif:0007-0515	1.34	65.692	0	504	54.75	58.478	0.85	88.012	6832	1.266	0.79	0.9	0.627632
812	CEP83_KAN699-6_1.tif:0008-0651	1.61	11.112	0	95	57.796	73.977	0.914	17.893	1389	1.143	0.875	0.896	0.127603
813	CEP83_KAN699-6_1.tif:0009-0678	1.327	113.893	0	902	22.716	77.009	0.965	151.122	11731	1.124	0.889	0.912	1.07769
814	CEP83_KAN699-6_1.tif:0010-0714	1.778	12.877	0	117	1.211	81.102	0.904	22.892	1777	1.43	0.699	0.936	0.163247
815	CEP83_KAN699-6_1.tif:0011-0802	1.481	30.678	0	114	66.161	91.001	0.876	45.449	3528	1.335	0.749	0.913	0.324105
816	CEP83_KAN699-6_1.tif:0012-0842	1.327	74.126	0	507	6.678	95.638	0.878	98.356	7635	1.42	0.704	0.907	0.701401
817	CEP83_KAN699-6_1.tif:0013-0957	1.623	82.643	0	524	53.643	108.685	0.948	134.143	10413	1.176	0.85	0.906	0.956607
818	CEP83_KAN699-6_2.tif:0001-0076	1.585	130.65	0	857	77.948	8.635	0.874	207.018	16070	1.281	0.781	0.895	1.4763
819	CEP83_KAN699-6_2.tif:0002-0108	1.34	99.26	0	429	51.95	12.292	0.956	132.983	10323	1.12	0.892	0.95	0.948339
820	CEP83_KAN699-6_2.tif:0003-0355	1.52	112.136	0	734	89.042	40.35	0.936	170.458	13232	1.347	0.742	0.937	1.21558
821	CEP83_KAN699-6_2.tif:0004-0376	1.507	116.615	0	633	140.254	42.746	0.928	175.765	13644	1.152	0.868	0.925	1.25343
822	CEP83_KAN699-6_2.tif:0005-0457	1.327	87.155	0	447	10.069	51.921	0.947	115.644	8977	1.111	0.9	0.936	0.824686
823	CEP83_KAN699-6_2.tif:0006-0515	1.713	127.459	0	926	64.357	58.522	0.909	218.38	16952	1.304	0.767	0.911	1.55732
824	CEP83_KAN699-6_2.tif:0007-0580	1.726	86.575	0	589	78.014	65.79	0.815	149.447	11601	1.881	0.532	0.905	1.06574
825	CEP83_KAN699-6_2.tif:0008-0598	1.301	94.475	0	633	113.297	67.896	0.977	122.922	9542	1.1	0.909	0.918	0.876591
826	CEP83_KAN699-6_2.tif:0009-0609	1.481	33.043	0	234	93.12	69.14	0.891	48.953	3800	1.043	0.959	0.875	0.349093
827	CEP83_KAN699-6_2.tif:0010-0634	1.636	126.992	0	661	15.806	71.931	0.801	207.765	16128	1.874	0.534	0.891	1.48162
828	CEP83_KAN699-6_2.tif:0011-0642	1.301	116	0	571	144.431	72.898	0.99	150.928	11716	1.049	0.954	0.94	1.07631
829	CEP83_KAN699-6_2.tif:0012-0672	1.288	88.07	0	555	77.634	76.22	0.919	113.454	8807	1.24	0.807	0.93	0.809069
830	CEP83_KAN699-6_2.tif:0013-0756	1.597	104.887	0	559	33.838	85.805	0.917	167.547	13006	1.265	0.791	0.932	1.19482
831	CEP83_KAN699-6_2.tif:0014-0850	1.572	94.934	0	656	61.674	96.471	0.903	149.202	11582	1.238	0.807	0.91	1.064
832	CEP83_KAN699-6_2.tif:0015-0998	1.366	43.632	0	336	32.791	113.34	0.932	59.58	4625	1.385	0.722	0.93	0.424883
833	CEP83_KAN699-6_3.tif:0001-0098	1.804	91.507	0	741	143.275	11.181	0.809	165.035	12811	1.451	0.689	0.883	1.1769
834	CEP83_KAN699-6_3.tif:0002-0307	1.378	27.14	0	462	22.478	34.879	0.929	37.41	2904	1.224	0.817	0.903	0.266781
835	CEP83_KAN699-6_3.tif:0003-0343	1.778	126.942	0	896	70.094	38.949	0.908	225.671	17518	1.122	0.892	0.887	1.60932
836	CEP83_KAN699-6_3.tif:0004-0440	1.765	114.263	0	713	136.116	50.047	0.888	201.659	15654	1.184	0.844	0.898	1.43808
837	CEP83_KAN699-6_3.tif:0005-0474	1.34	35.173	0	122	111.587	53.801	0.887	47.123	3658	1.202	0.832	0.904	0.336048
838	CEP83_KAN699-6_3.tif:0006-0560	1.43	65.793	0	392	94.43	63.555	0.896	94.079	7303	1.291	0.775	0.906	0.670902
839	CEP83_KAN699-6_3.tif:0007-0727	2.28	19.243	0	148	52.116	82.572	0.832	43.877	3406	1.323	0.756	0.878	0.312898
840	CEP83_KAN699-6_3.tif:0008-0819	1.894	160.891	0	1108	66.591	92.999	0.841	304.678	23651	1.163	0.86	0.886	2.17274
841	CEP83_KAN699-6_3.tif:0009-0871	1.881	117.342	0	1219	83.904	98.88	0.823	220.699	17132	1.559	0.641	0.904	1.57386
842	CEP83_KAN699-6_3.tif:0010-1147	1.456	65.407	0	382	52.063	130.149	0.817	95.213	7391	1.703	0.587	0.879	0.678986
843	CEP83_KAN699-6_3.tif:0011-1190	1.752	86.566	0	595	127.641	135.029	0.767	151.663	11773	1.869	0.535	0.895	1.08155
844	CEP83_KAN699-6_4.tif:0001-0029	1.456	91.735	0	580	9.415	3.277	0.781	133.537	10366	1.754	0.57	0.866	0.952289
845	CEP83_KAN699-6_4.tif:0002-0038	1.456	121.088	0	526	58.079	4.286	0.813	176.268	13683	1.457	0.686	0.876	1.25701
846	CEP83_KAN699-6_4.tif:0003-0110	1.572	142.697	0	1010	36.896	12.481	0.913	224.267	17409	1.026	0.975	0.938	1.59931
847	CEP83_KAN699-6_4.tif:0004-0264	1.546	55.858	0	436	111.75	29.973	0.969	86.35	6703	1.242	0.805	0.923	0.615782
848	CEP83_KAN699-6_4.tif:0005-0291	1.739	98.533	0	765	75.199	33.002	0.884	171.36	13302	1.379	0.725	0.922	1.22201
849	CEP83_KAN699-6_4.tif:0006-0642	1.791	135.086	0	864	77.318	72.903	0.784	241.89	18777	1.483	0.674	0.885	1.72498
850	CEP83_KAN699-6_4.tif:0007-0759	1.61	91.392	0	576	48.363	86.295	0.841	147.167	11424	1.482	0.675	0.903	1.04948
851	CEP83_KAN699-6_4.tif:0008-0824	1.443	72.196	0	246	22.635	93.522	0.904	104.166	8086	1.339	0.747	0.9	0.742833
852	CEP83_KAN699-6_4.tif:0009-1001	1.378	82.701	0	721	114.254	113.62	0.815	113.995	8849	1.462	0.684	0.866	0.812927
853	CEP83_KAN699-6_4.tif:0010-1042	1.662	61.798	0	467	79.969	118.292	0.793	102.697	7972	1.5	0.667	0.893	0.73236
854	CEP83_KAN699-6_5.tif:0001-0024	1.907	74.635	0	432	87.671	2.762	0.76	142.297	11046	1.811	0.552	0.884	1.01476
855	CEP83_KAN699-6_5.tif:0002-0130	1.752	87.735	0	511	122.285	14.886	0.806	153.711	11932	1.259	0.794	0.898	1.09615
856	CEP83_KAN699-6_5.tif:0003-0238	1.417	100.845	0	363	137.582	27.059	0.899	142.903	11093	1.46	0.685	0.921	1.01908
857	CEP83_KAN699-6_5.tif:0004-0254	1.533	76.605	0	563	39.803	28.841	0.933	117.435	9116	1.311	0.763	0.919	0.837456
858	CEP83_KAN699-6_5.tif:0005-0419	1.456	144.071	0	718	72.426	47.502	0.952	209.723	16280	1.025	0.975	0.93	1.49559
859	CEP83_KAN699-6_5.tif:0006-0575	1.559	94.455	0	680	97.154	65.339	0.948	147.231	11429	1.084	0.923	0.92	1.04994
860	CEP83_KAN699-6_5.tif:0007-0629	1.288	118.68	0	533	122.387	71.424	0.949	152.887	11868	1.187	0.843	0.939	1.09027
861	CEP83_KAN699-6_5.tif:0008-0678	1.662	28.31	0	138	70.388	76.921	0.793	47.046	3652	1.611	0.621	0.887	0.335497
862	CEP83_KAN699-6_5.tif:0009-0871	3.44	12.277	0	117	40.27	98.955	0.67	42.228	3278	1.143	0.875	0.799	0.301139
863	CEP83_KAN699-6_5.tif:0010-0921	1.726	83.97	0	624	49.755	104.616	0.882	144.951	11252	1.536	0.651	0.902	1.03368
864	CEP83_KAN699-6_5.tif:0011-0950	2.267	17.807	0	86	107.363	107.867	0.866	40.373	3134	1.195	0.837	0.903	0.28791
865	CEP83_KAN699-6_5.tif:0012-1002	1.481	84.93	0	543	127.728	113.746	0.969	125.821	9767	1.156	0.865	0.931	0.897261
866	CEP83_KAN699-6_6.tif:0001-0067	1.353	87.343	0	310	142.119	7.574	0.941	118.143	9171	1.558	0.642	0.929	0.842508
867	CEP83_KAN699-6_6.tif:0002-0302	1.288	95.26	0	321	59.103	34.328	0.919	122.716	9526	1.313	0.762	0.939	0.875121
868	CEP83_KAN699-6_6.tif:0003-0381	1.443	63.116	0	259	82.091	43.321	0.955	91.065	7069	1.211	0.826	0.945	0.649405
869	CEP83_KAN699-6_6.tif:0004-0500	1.391	73.259	0	369	70.493	56.732	0.95	101.924	7912	1.104	0.906	0.931	0.726848
870	CEP83_KAN699-6_6.tif:0005-0753	1.481	86.783	0	611	54.278	85.463	0.876	128.565	9980	1.353	0.739	0.902	0.916828
871	CEP83_KAN699-6_6.tif:0006-0837	1.314	107.922	0	524	113.181	94.996	0.938	141.808	11008	1.287	0.777	0.944	1.01127
872	CEP83_KAN699-6_6.tif:0007-0844	1.494	62.026	0	385	28.343	95.734	0.909	92.688	7195	1.26	0.793	0.91	0.66098
873	CEP83_KAN699-6_6.tif:0008-0846	2.177	8.882	0	76	109.353	96.001	0.851	19.336	1501	1.066	0.938	0.856	0.137892
874	CEP83_KAN699-6_6.tif:0009-0905	1.288	58.55	0	238	93.794	102.746	0.949	75.426	5855	1.102	0.908	0.926	0.537879
										9989.11				0.917665
875	CEP83_KAN699-7_1.tif:0001-0133	1.649	109.031	0	880	40.24	15.118	0.895	179.785	13956	1.239	0.807	0.928	1.28209
876	CEP83_KAN699-7_1.tif:0002-0190	1.984	17.773	0	125	75.528	21.595	0.872	35.259	2737	1.177	0.85	0.877	0.251439
877	CEP83_KAN699-7_1.tif:0003-0239	1.507	87.282	0	722	99.925	27.167	0.891	131.554	10212	1.126	0.888	0.9	0.938141
878	CEP83_KAN699-7_1.tif:0004-0322	1.585	62.561	0	614	31.202	36.646	0.885	99.129	7695	1.506	0.664	0.935	0.706913
879	CEP83_KAN699-7_1.tif:0005-0349	1.7	33.409	0	179	56.371	39.653	0.888	56.811	4410	1.305	0.766	0.913	0.405132
880	CEP83_KAN699-7_1.tif:0006-0404	1.288	106.18	0	625	102.865	45.933	0.937	136.784	10618	1.254	0.798	0.922	0.975439
881	CEP83_KAN699-7_1.tif:0007-0421	1.288	91.62	0	586	14.456	47.829	0.981	118.027	9162	1.063	0.941	0.935	0.841682
882	CEP83_KAN699-7_1.tif:0008-0584	1.391	39.463	0	219	90.422	66.301	0.91	54.904	4262	1.341	0.746	0.911	0.391535
883	CEP83_KAN699-7_1.tif:0009-0637	1.469	88.588	0	709	119.208	72.372	0.932	130.098	10099	1.22	0.82	0.919	0.927761
884	CEP83_KAN699-7_1.tif:0010-0685	1.481	61.93	0	364	29.226	77.717	0.876	91.747	7122	1.619	0.617	0.909	0.654274
885	CEP83_KAN699-7_1.tif:0011-0838	1.366	73.17	0	328	35.113	95.149	0.862	99.915	7756	1.259	0.794	0.942	0.712517
886	CEP83_KAN699-7_1.tif:0012-0871	1.7	69.606	0	296	107.735	98.842	0.888	118.362	9188	1.579	0.633	0.93	0.84407
887	CEP83_KAN699-7_2.tif:0001-0056	1.314	21.431	0	88	125.613	6.427	0.968	28.161	2186	1.117	0.895	0.944	0.20082
888	CEP83_KAN699-7_2.tif:0002-0098	1.713	55.083	0	251	35.812	11.204	0.862	94.375	7326	1.295	0.772	0.896	0.673015
889	CEP83_KAN699-7_2.tif:0003-0117	1.623	117.278	0	576	102.51	13.351	0.896	190.361	14777	1.143	0.875	0.9	1.35751
890	CEP83_KAN699-7_2.tif:0004-0166	1.404	88.532	0	288	69.071	18.912	0.946	124.314	9650	1.359	0.736	0.92	0.886512
891	CEP83_KAN699-7_2.tif:0005-0325	2.963	34.7	0	218	16.237	36.988	0.751	102.813	7981	2.13	0.469	0.926	0.733187
892	CEP83_KAN699-7_2.tif:0006-0330	1.61	72.88	0	497	110.436	37.455	0.864	117.357	9110	1.327	0.754	0.909	0.836905
893	CEP83_KAN699-7_2.tif:0007-0396	1.469	94.088	0	552	4.323	45.027	0.878	138.175	10726	1.26	0.794	0.919	0.985361
894	CEP83_KAN699-7_2.tif:0008-0462	1.546	97.575	0	403	47.93	52.398	0.969	150.838	11709	1.19	0.841	0.927	1.07567
895	CEP83_KAN699-7_2.tif:0009-0491	1.353	106.057	0	547	118.616	55.781	0.896	143.457	11136	1.522	0.657	0.938	1.02303
896	CEP83_KAN699-7_2.tif:0010-0672	1.572	59.885	0	397	124.239	76.337	0.929	94.118	7306	1.259	0.794	0.931	0.671177
897	CEP83_KAN699-7_2.tif:0011-0729	1.559	117.669	0	469	28.089	82.752	0.921	183.418	14238	1.464	0.683	0.931	1.308
898	CEP83_KAN699-7_2.tif:0012-0993	1.34	91.404	0	543	64.019	112.716	0.944	122.459	9506	1.31	0.763	0.92	0.873284
899	CEP83_KAN699-7_2.tif:0013-1031	1.34	118.683	0	795	88.176	116.997	0.956	159.006	12343	1.154	0.866	0.941	1.13391
900	CEP83_KAN699-7_3.tif:0001-0057	1.688	60.748	0	347	46.219	6.455	0.849	102.517	7958	1.528	0.654	0.907	0.731074
901	CEP83_KAN699-7_3.tif:0002-0059	1.572	149.934	0	862	65.923	6.677	0.821	235.642	18292	1.502	0.666	0.897	1.68042
902	CEP83_KAN699-7_3.tif:0003-0113	1.34	60.798	0	238	36.607	12.798	0.915	81.454	6323	1.102	0.907	0.904	0.580872
903	CEP83_KAN699-7_3.tif:0004-0358	1.804	63.436	0	277	18.231	40.725	0.874	114.407	8881	1.497	0.668	0.918	0.815867
904	CEP83_KAN699-7_3.tif:0005-0426	2.151	12.988	0	75	31.784	48.318	0.775	27.942	2169	1.723	0.581	0.903	0.199259
905	CEP83_KAN699-7_3.tif:0006-0427	1.494	126.836	0	648	134.581	48.459	0.932	189.537	14713	1.198	0.835	0.951	1.35163
906	CEP83_KAN699-7_3.tif:0007-0446	1.585	74.13	0	267	53.386	50.621	0.936	117.46	9118	1.177	0.849	0.914	0.837639
907	CEP83_KAN699-7_3.tif:0008-0528	1.417	115.345	0	605	88.655	59.926	0.91	163.45	12688	1.388	0.72	0.952	1.1656
908	CEP83_KAN699-7_3.tif:0009-0575	1.533	70.538	0	418	14.28	65.27	0.891	108.134	8394	1.441	0.694	0.937	0.771128
909	CEP83_KAN699-7_3.tif:0010-0589	2.705	28.481	0	131	48.071	66.834	0.833	77.049	5981	1.223	0.818	0.892	0.549454
910	CEP83_KAN699-7_3.tif:0011-0803	1.353	41.267	0	111	115.322	91.183	0.884	55.819	4333	1.259	0.794	0.901	0.398058
911	CEP83_KAN699-7_3.tif:0012-0890	1.585	116.398	0	489	51.368	101.018	0.874	184.435	14317	1.474	0.678	0.911	1.31525
912	CEP83_KAN699-7_3.tif:0013-0996	1.404	101.761	0	499	81.222	113.04	0.865	142.89	11092	1.457	0.687	0.912	1.01898
913	CEP83_KAN699-7_3.tif:0014-1047	1.43	106.712	0	565	31.207	118.874	0.855	152.59	11845	1.225	0.816	0.902	1.08816
914	CEP83_KAN699-7_3.tif:0015-1092	1.804	49.864	0	243	129.799	124.068	0.897	89.931	6981	1.308	0.765	0.909	0.641321
915	CEP83_KAN699-7_3.tif:0016-1170	1.507	89.675	0	617	116.326	132.796	0.985	135.161	10492	1.284	0.779	0.944	0.963864
916	CEP83_KAN699-7_4.tif:0001-0125	1.623	117.69	0	805	71.185	14.151	0.906	191.031	14829	1.303	0.768	0.933	1.36229
917	CEP83_KAN699-7_4.tif:0002-0189	1.52	184.78	0	943	51.418	21.492	0.964	280.885	21804	1.167	0.857	0.952	2.00306
918	CEP83_KAN699-7_4.tif:0003-0205	1.572	97.016	0	530	30.358	23.369	0.877	152.474	11836	1.442	0.693	0.917	1.08733
919	CEP83_KAN699-7_4.tif:0004-0220	1.778	113.587	0	689	111.858	24.986	0.894	201.929	15675	1.62	0.617	0.932	1.44001
920	CEP83_KAN699-7_4.tif:0005-0232	1.378	239.636	0	1210	100.85	26.406	0.913	330.314	25641	1.071	0.933	0.911	2.35555
921	CEP83_KAN699-7_4.tif:0006-0253	1.919	22.094	0	161	14.282	28.759	0.748	42.408	3292	1.939	0.516	0.882	0.302425
922	CEP83_KAN699-7_4.tif:0007-0342	1.417	81.645	0	529	28.41	38.924	0.873	115.696	8981	1.41	0.709	0.905	0.825054
923	CEP83_KAN699-7_4.tif:0008-0432	1.688	132.282	0	893	69.809	49.021	0.931	223.237	17329	1.193	0.839	0.923	1.59196
924	CEP83_KAN699-7_4.tif:0009-0646	1.507	185.752	0	1586	93.963	73.357	0.861	279.97	21733	1.299	0.77	0.951	1.99654
925	CEP83_KAN699-7_4.tif:0010-0837	1.52	98.619	0	457	15.813	95.082	0.936	149.911	11637	1.342	0.745	0.937	1.06905
926	CEP83_KAN699-7_4.tif:0011-0873	1.443	46.982	0	212	123.004	99.144	0.915	67.786	5262	1.179	0.848	0.918	0.483402
927	CEP83_KAN699-7_5.tif:0001-0108	1.7	53.182	0	305	33.302	12.282	0.913	90.433	7020	1.422	0.703	0.926	0.644903
928	CEP83_KAN699-7_5.tif:0002-0142	1.765	64.095	0	606	116.731	16.083	0.833	113.119	8781	1.405	0.712	0.884	0.80668
929	CEP83_KAN699-7_5.tif:0003-0240	1.597	80.403	0	478	29.432	27.235	0.907	128.436	9970	1.036	0.965	0.899	0.91591
930	CEP83_KAN699-7_5.tif:0004-0291	1.765	121.234	0	706	60.305	32.982	0.888	213.961	16609	1.067	0.937	0.898	1.52581
931	CEP83_KAN699-7_5.tif:0005-0298	1.881	102.452	0	887	98.6	33.812	0.897	192.693	14958	1.329	0.752	0.945	1.37414
932	CEP83_KAN699-7_5.tif:0006-0490	1.713	108.992	0	963	129.71	55.621	0.75	186.741	14496	1.511	0.662	0.881	1.3317
933	CEP83_KAN699-7_5.tif:0007-0495	2.332	32.061	0	166	113.18	56.227	0.843	74.756	5803	1.063	0.94	0.868	0.533102
934	CEP83_KAN699-7_5.tif:0008-0638	1.713	128.744	0	695	99.281	72.475	0.862	220.583	17123	1.154	0.866	0.89	1.57303
935	CEP83_KAN699-7_5.tif:0009-0706	1.443	107.964	0	584	122.454	80.094	0.863	155.772	12092	1.497	0.668	0.914	1.11085
936	CEP83_KAN699-7_5.tif:0010-0750	1.894	82.857	0	646	140.018	85.148	0.871	156.906	12180	1.229	0.814	0.91	1.11893
937	CEP83_KAN699-7_5.tif:0011-0776	1.881	112.767	0	838	32.744	88.103	0.823	212.093	16464	1.496	0.668	0.888	1.51249
938	CEP83_KAN699-7_5.tif:0012-0794	1.417	74.891	0	428	16.302	90.134	0.95	106.124	8238	1.019	0.982	0.969	0.756797
939	CEP83_KAN699-7_5.tif:0013-0880	1.7	96.917	0	573	68.077	99.877	0.903	164.803	12793	1.172	0.853	0.895	1.17525
940	CEP83_KAN699-7_5.tif:0014-0948	1.597	73.855	0	421	103.842	107.6	0.882	117.976	9158	1.226	0.815	0.892	0.841314
941	CEP83_KAN699-7_5.tif:0015-1111	1.868	90.441	0	653	130.363	126.144	0.829	168.938	13114	1.412	0.708	0.881	1.20474
942	CEP83_KAN699-7_5.tif:0016-1253	1.894	137.17	0	614	46.374	142.336	0.871	259.758	20164	1.02	0.98	0.919	1.8524
943	CEP83_KAN699-7_6.tif:0001-0108	1.43	121.505	0	652	125.965	12.322	0.907	173.743	13487	1.274	0.785	0.906	1.239
944	CEP83_KAN699-7_6.tif:0002-0246	1.765	151.518	0	935	38.158	27.973	0.897	267.41	20758	1.162	0.861	0.932	1.90697
945	CEP83_KAN699-7_6.tif:0003-0390	1.713	106.97	0	742	141.679	44.241	0.895	183.276	14227	1.338	0.747	0.914	1.30699
946	CEP83_KAN699-7_6.tif:0004-0439	1.597	34.968	0	331	111.57	49.907	0.882	55.857	4336	1.352	0.739	0.908	0.398333
947	CEP83_KAN699-7_6.tif:0005-0479	1.314	29.912	0	130	15.351	54.476	0.859	39.304	3051	1.473	0.679	0.883	0.280285
948	CEP83_KAN699-7_6.tif:0006-0723	1.533	142.445	0	799	35.177	82.109	0.81	218.367	16951	1.865	0.536	0.919	1.55723
949	CEP83_KAN699-7_6.tif:0007-0742	1.907	17.453	0	112	117.992	84.281	0.924	33.275	2583	1.18	0.848	0.931	0.237291
950	CEP83_KAN699-7_6.tif:0008-0787	2.048	199.893	0	1416	74.542	89.361	0.825	409.437	31783	1.64	0.61	0.914	2.9198
951	CEP83_KAN699-7_6.tif:0009-0996	1.533	42.966	0	270	81.476	113.07	0.771	65.867	5113	1.755	0.57	0.872	0.469714
952	CEP83_KAN699-7_6.tif:0010-1046	1.391	39.352	0	185	15.689	118.75	0.967	54.75	4250	1.201	0.832	0.931	0.390433
953	CEP83_KAN699-7_6.tif:0011-1048	1.288	107.42	0	676	122.444	118.971	0.903	138.381	10742	1.117	0.895	0.957	0.986831
954	CEP83_KAN699-7_6.tif:0012-1151	1.288	66.34	0	382	91.228	130.684	0.937	85.461	6634	1.347	0.743	0.917	0.609443
										10871.1				0.998687
955	CEP83_KAN699-8_1.tif:0001-0017	2.357	61.131	0	553	43.996	1.852	0.787	144.114	11187	1.542	0.649	0.897	1.02771
956	CEP83_KAN699-8_1.tif:0002-0024	1.43	106.378	0	553	25.529	2.667	0.776	152.114	11808	1.654	0.605	0.877	1.08476
957	CEP83_KAN699-8_1.tif:0003-0060	2.744	26.484	0	177	29.493	6.889	0.745	72.669	5641	1.578	0.634	0.889	0.518219
958	CEP83_KAN699-8_1.tif:0004-0080	1.649	114.781	0	393	71.008	9.1	0.852	189.266	14692	1.432	0.698	0.895	1.3497
959	CEP83_KAN699-8_1.tif:0005-0120	1.597	54.363	0	274	14.914	13.569	0.844	86.839	6741	1.532	0.653	0.932	0.619273
960	CEP83_KAN699-8_1.tif:0006-0198	1.765	24.847	0	130	61.022	22.425	0.784	43.851	3404	1.771	0.565	0.881	0.312714
961	CEP83_KAN699-8_1.tif:0007-0222	1.739	90.022	0	425	107.392	25.131	0.852	156.558	12153	1.454	0.688	0.888	1.11645
962	CEP83_KAN699-8_1.tif:0008-0321	1.649	77.727	0	384	135.492	36.469	0.875	128.166	9949	1.489	0.671	0.886	0.913981
963	CEP83_KAN699-8_1.tif:0009-0376	1.288	61.76	0	279	80.307	42.718	0.949	79.561	6176	1.101	0.908	0.93	0.567368
964	CEP83_KAN699-8_1.tif:0010-0471	1.469	33.061	0	378	23.35	53.551	0.868	48.553	3769	1.401	0.714	0.901	0.346245
965	CEP83_KAN699-8_1.tif:0011-0502	1.662	139.442	0	1026	94.613	56.97	0.878	231.726	17988	1.201	0.832	0.925	1.6525
966	CEP83_KAN699-8_1.tif:0012-0603	2.847	159.977	0	803	69.634	68.478	0.841	455.452	35355	1.473	0.679	0.908	3.24794
967	CEP83_KAN699-8_1.tif:0013-0753	1.752	100.757	0	708	84.089	85.454	0.919	176.525	13703	1.226	0.816	0.904	1.25885
968	CEP83_KAN699-8_1.tif:0014-0759	1.314	106.529	0	646	3.78	86.149	0.909	139.979	10866	1.186	0.843	0.936	0.998222
969	CEP83_KAN699-8_1.tif:0015-0765	2.01	101.558	0	790	119.21	86.828	0.841	204.094	15843	1.441	0.694	0.886	1.45544
970	CEP83_KAN699-8_1.tif:0016-0952	1.481	57.313	0	269	85.018	108.073	0.94	84.907	6591	1.298	0.77	0.931	0.605493
971	CEP83_KAN699-8_1.tif:0017-0953	1.314	36.647	0	167	11.49	108.163	0.968	48.154	3738	1.303	0.767	0.944	0.343397
972	CEP83_KAN699-8_1.tif:0018-0973	1.688	54.191	0	461	34.379	110.601	0.836	91.451	7099	1.453	0.688	0.916	0.652161
973	CEP83_KAN699-8_1.tif:0019-1064	1.585	81.967	0	494	59.911	120.894	0.851	129.879	10082	1.219	0.82	0.898	0.926199
974	CEP83_KAN699-8_1.tif:0020-1137	1.572	85.713	0	551	132.469	129.017	0.853	134.71	10457	1.525	0.656	0.914	0.960649
975	CEP83_KAN699-8_1.tif:0021-1244	1.559	55.843	0	369	99.934	141.237	0.87	87.045	6757	1.563	0.64	0.92	0.620742
976	CEP83_KAN699-8_2.tif:0001-0009	1.61	44.976	0	468	121.885	0.916	0.841	72.424	5622	1.281	0.78	0.903	0.516474
977	CEP83_KAN699-8_2.tif:0002-0136	1.314	13.196	0	53	68.093	15.417	0.897	17.34	1346	1.104	0.906	0.907	0.123652
978	CEP83_KAN699-8_2.tif:0003-0185	1.494	89.75	0	641	103.348	21.028	0.834	134.117	10411	1.563	0.64	0.913	0.956423
979	CEP83_KAN699-8_2.tif:0004-0226	1.675	50.192	0	249	55.979	25.725	0.924	84.057	6525	1.485	0.674	0.925	0.599429
980	CEP83_KAN699-8_2.tif:0005-0371	1.675	63.808	0	435	8.23	42.095	0.852	106.858	8295	1.407	0.711	0.929	0.762033
981	CEP83_KAN699-8_2.tif:0006-0374	1.443	134.625	0	785	59.358	42.484	0.806	194.239	15078	1.687	0.593	0.882	1.38516
982	CEP83_KAN699-8_2.tif:0007-0465	1.366	28.66	0	127	90.916	52.878	0.932	39.136	3038	1.353	0.739	0.926	0.279091
983	CEP83_KAN699-8_2.tif:0008-0492	1.585	71.512	0	483	112.039	55.804	0.874	113.312	8796	1.151	0.869	0.885	0.808058
984	CEP83_KAN699-8_2.tif:0009-0636	1.469	107.342	0	654	21.766	72.271	0.948	157.64	12237	1.247	0.802	0.905	1.12417
985	CEP83_KAN699-8_2.tif:0010-0641	1.314	105.118	0	549	46.973	72.835	0.968	138.124	10722	1.046	0.956	0.94	0.984993
986	CEP83_KAN699-8_2.tif:0011-0736	1.417	130.373	0	723	115.615	83.534	0.938	184.744	14341	1.256	0.796	0.936	1.31746
987	CEP83_KAN699-8_2.tif:0012-0783	1.572	95.525	0	699	28.032	88.842	0.888	150.13	11654	1.473	0.679	0.953	1.07061
988	CEP83_KAN699-8_2.tif:0013-0800	1.52	73.178	0	280	68.239	90.848	0.925	111.238	8635	1.42	0.704	0.922	0.793268
989	CEP83_KAN699-8_2.tif:0014-0846	1.353	50.057	0	145	126.391	96.069	0.935	67.709	5256	1.149	0.871	0.946	0.482851
990	CEP83_KAN699-8_2.tif:0015-0952	1.52	97.212	0	643	141.391	108.14	0.816	147.772	11471	1.407	0.711	0.881	1.0538
991	CEP83_KAN699-8_2.tif:0016-0977	1.378	100.421	0	523	94.8	110.896	0.941	138.42	10745	1.163	0.86	0.93	0.987106
992	CEP83_KAN699-8_3.tif:0001-0044	1.675	99.454	0	578	90.725	5.02	0.842	166.555	12929	1.348	0.742	0.881	1.18774
993	CEP83_KAN699-8_3.tif:0002-0157	1.688	71.771	0	545	51.026	17.818	0.858	121.119	9402	1.144	0.874	0.903	0.86373
994	CEP83_KAN699-8_3.tif:0003-0347	1.739	97.222	0	779	96.316	39.424	0.934	169.08	13125	1.161	0.862	0.925	1.20575
995	CEP83_KAN699-8_3.tif:0004-0368	1.649	66.273	0	339	77.624	41.713	0.91	109.28	8483	1.287	0.777	0.928	0.779304
996	CEP83_KAN699-8_3.tif:0005-0414	1.52	27.5	0	294	20.91	47	0.953	41.803	3245	1.186	0.843	0.911	0.298107
997	CEP83_KAN699-8_3.tif:0006-0819	1.378	119.402	0	622	19.116	92.995	0.984	164.584	12776	1.076	0.93	0.96	1.17369
998	CEP83_KAN699-8_3.tif:0007-0975	2.035	82.19	0	779	80.86	110.732	0.743	167.289	12986	1.998	0.5	0.856	1.19298
999	CEP83_KAN699-8_3.tif:0008-1004	1.494	95.586	0	577	131.294	113.952	0.802	142.838	11088	1.123	0.89	0.85	1.01862
1000	CEP83_KAN699-8_3.tif:0009-1043	1.378	48.832	0	251	99.611	118.392	0.885	67.31	5225	1.581	0.632	0.943	0.480003
1001	CEP83_KAN699-8_3.tif:0010-1080	1.469	35.684	0	134	60.877	122.563	0.904	52.405	4068	1.436	0.697	0.931	0.373713
1002	CEP83_KAN699-8_4.tif:0001-0074	1.688	116.282	0	703	104.472	8.405	0.931	196.235	15233	1.359	0.736	0.932	1.3994
1003	CEP83_KAN699-8_4.tif:0002-0116	1.404	37.725	0	329	125.979	13.162	0.971	52.972	4112	1.233	0.811	0.96	0.377755
1004	CEP83_KAN699-8_4.tif:0003-0153	1.649	89.18	0	532	85.152	17.42	0.921	147.051	11415	1.255	0.797	0.934	1.04866
1005	CEP83_KAN699-8_4.tif:0004-0190	1.353	55.676	0	371	144.579	21.62	0.869	75.31	5846	1.353	0.739	0.938	0.537052
1006	CEP83_KAN699-8_4.tif:0005-0284	2.113	29.695	0	141	25.726	32.267	0.884	62.737	4870	1.4	0.714	0.911	0.44739
1007	CEP83_KAN699-8_4.tif:0006-0336	1.816	169.603	0	989	38.171	38.206	0.913	308.066	23914	1.469	0.681	0.943	2.1969
1008	CEP83_KAN699-8_4.tif:0007-0346	1.417	106.455	0	668	131.044	39.241	0.967	150.851	11710	1.063	0.941	0.94	1.07576
1009	CEP83_KAN699-8_4.tif:0008-0438	1.378	100.047	0	273	67.854	49.776	0.913	137.905	10705	1.066	0.938	0.918	0.983432
1010	CEP83_KAN699-8_4.tif:0009-0592	1.61	129.224	0	632	103.617	67.181	0.963	208.087	16153	1.113	0.899	0.947	1.48392
1011	CEP83_KAN699-8_4.tif:0010-0786	1.765	116.518	0	723	122.254	89.201	0.888	205.639	15963	1.296	0.771	0.919	1.46647
1012	CEP83_KAN699-8_4.tif:0011-0823	1.533	82.849	0	446	27.29	93.38	0.88	127.006	9859	1.522	0.657	0.915	0.905713
1013	CEP83_KAN699-8_4.tif:0012-0930	1.378	77.103	0	531	11.649	105.588	0.896	106.279	8250	1.202	0.832	0.951	0.757899
1014	CEP83_KAN699-8_4.tif:0013-0981	1.649	96.906	0	670	63.529	111.358	0.91	159.791	12404	1.282	0.78	0.921	1.13951
1015	CEP83_KAN699-8_4.tif:0014-0993	1.533	88.37	0	628	99.591	112.768	0.895	135.47	10516	1.354	0.739	0.898	0.966069
1016	CEP83_KAN699-8_4.tif:0015-1210	1.391	48.861	0	261	46.829	137.375	0.938	67.98	5277	1.211	0.825	0.904	0.48478
1017	CEP83_KAN699-8_5.tif:0001-0120	1.443	121.125	0	686	95.84	13.599	0.899	174.761	13566	1.373	0.729	0.945	1.24626
1018	CEP83_KAN699-8_5.tif:0002-0243	1.494	47.543	0	198	55.7	27.625	0.977	71.046	5515	1.153	0.867	0.932	0.506644
1019	CEP83_KAN699-8_5.tif:0003-0365	1.52	77.093	0	617	121.502	41.467	0.981	117.19	9097	1.072	0.933	0.922	0.83571
1020	CEP83_KAN699-8_5.tif:0004-0440	1.61	84.696	0	565	134.712	49.966	0.864	136.384	10587	1.532	0.653	0.89	0.972591
1021	CEP83_KAN699-8_5.tif:0005-0494	1.984	32.734	0	159	9.739	56.115	0.859	64.939	5041	1.542	0.649	0.919	0.463099
1022	CEP83_KAN699-8_5.tif:0006-0501	1.43	14.351	0	67	138.781	56.964	0.935	20.521	1593	1.315	0.76	0.925	0.146343
1023	CEP83_KAN699-8_5.tif:0007-0557	1.481	73.878	0	430	26.25	63.128	0.804	109.448	8496	1.203	0.832	0.881	0.780498
1024	CEP83_KAN699-8_5.tif:0008-0613	1.597	88.79	0	561	17.011	69.593	0.984	141.834	11010	1.119	0.894	0.947	1.01145
1025	CEP83_KAN699-8_5.tif:0009-0628	1.868	88.662	0	370	96.125	71.228	0.929	165.614	12856	1.14	0.877	0.915	1.18104
1026	CEP83_KAN699-8_5.tif:0010-0815	1.739	77.978	0	388	120.934	92.525	0.898	135.611	10527	1.327	0.754	0.912	0.967079
1027	CEP83_KAN699-8_5.tif:0011-1006	1.314	62.382	0	249	63.839	114.251	0.87	81.97	6363	1.467	0.682	0.919	0.584547
1028	CEP83_KAN699-8_5.tif:0012-1107	2.01	16.84	0	69	42.62	125.615	0.915	33.842	2627	1.122	0.892	0.91	0.241333
1029	CEP83_KAN699-8_6.tif:0001-0142	1.932	42.133	0	215	135.13	16.14	0.849	81.416	6320	1.628	0.614	0.896	0.580597
1030	CEP83_KAN699-8_6.tif:0002-0319	1.494	135.983	0	838	8.41	36.247	0.92	203.205	15774	1.213	0.825	0.928	1.4491
1031	CEP83_KAN699-8_6.tif:0003-0325	1.649	107.672	0	764	106.613	36.985	0.852	177.543	13782	1.569	0.637	0.901	1.26611
1032	CEP83_KAN699-8_6.tif:0004-0471	1.378	36	0	163	60.165	53.56	0.971	49.622	3852	1.168	0.856	0.934	0.35387
1033	CEP83_KAN699-8_6.tif:0005-0517	1.507	130.479	0	832	58.69	58.645	0.787	196.66	15266	1.491	0.671	0.873	1.40244
1034	CEP83_KAN699-8_6.tif:0006-0644	1.353	80.457	0	377	23.004	73.155	0.912	108.829	8448	1.443	0.693	0.925	0.776089
1035	CEP83_KAN699-8_6.tif:0007-0818	1.456	36.186	0	180	35.137	92.847	0.886	52.676	4089	1.453	0.688	0.915	0.375642
1036	CEP83_KAN699-8_6.tif:0008-0893	1.443	101.241	0	492	55.161	101.369	0.889	146.072	11339	1.44	0.694	0.918	1.04168
1037	CEP83_KAN699-8_6.tif:0009-0969	1.391	99.926	0	497	40.544	109.98	0.857	139.025	10792	1.504	0.665	0.908	0.991424
1038	CEP83_KAN699-8_6.tif:0010-1061	1.675	91.138	0	601	100.965	120.506	0.82	152.629	11848	1.583	0.632	0.878	1.08844
1039	CEP83_KAN699-8_6.tif:0011-1077	1.494	41.448	0	192	46.591	122.309	0.936	61.938	4808	1.047	0.955	0.91	0.441695
1040	CEP83_KAN699-8_6.tif:0012-1247	1.288	42.05	0	299	144.176	141.517	0.907	54.17	4205	1.243	0.804	0.909	0.386299
1041	CEP83_KAN699-8_6.tif:0013-1250	1.353	48.733	0	389	113.937	141.937	0.869	65.918	5117	1.407	0.711	0.917	0.470081
										9687.71				0.889977
1042	CEP83_KAN699-9_1.tif:0001-0017	1.868	83.186	0	667	139.609	1.893	0.829	155.386	12062	1.687	0.593	0.915	1.10809
1043	CEP83_KAN699-9_1.tif:0002-0132	1.378	96.047	0	594	132.776	14.955	0.849	132.391	10277	1.521	0.658	0.907	0.944113
1044	CEP83_KAN699-9_1.tif:0003-0205	1.481	114.748	0	753	68.116	23.263	0.969	169.994	13196	1.021	0.979	0.927	1.21227
1045	CEP83_KAN699-9_1.tif:0004-0342	1.932	25.513	0	107	130.167	38.812	0.936	49.3	3827	1.257	0.796	0.932	0.351573
1046	CEP83_KAN699-9_1.tif:0005-0437	1.636	77.354	0	340	106.644	49.673	0.878	126.555	9824	1.15	0.869	0.894	0.902497
1047	CEP83_KAN699-9_1.tif:0006-0470	1.572	158.426	0	911	85.882	53.387	0.929	248.988	19328	1.24	0.806	0.917	1.7756
1048	CEP83_KAN699-9_1.tif:0007-0665	1.494	91.828	0	537	9.839	75.455	0.909	137.222	10652	1.283	0.779	0.917	0.978563
1049	CEP83_KAN699-9_1.tif:0008-0714	1.34	75.269	0	344	77.256	81.119	0.944	100.842	7828	1.122	0.891	0.916	0.719132
1050	CEP83_KAN699-9_1.tif:0009-0857	1.353	67.352	0	398	62.117	97.378	0.884	91.103	7072	1.455	0.687	0.905	0.64968
1051	CEP83_KAN699-9_1.tif:0010-0949	1.288	192.93	0	863	99.732	107.76	0.981	248.537	19293	1.085	0.922	0.93	1.77238
1052	CEP83_KAN699-9_1.tif:0011-0976	1.34	112.577	0	568	112.965	110.874	0.927	150.825	11708	1.016	0.984	0.933	1.07557
1053	CEP83_KAN699-9_1.tif:0012-1013	2.757	15.234	0	72	43.227	115.118	0.748	41.996	3260	1.268	0.789	0.839	0.299485
1054	CEP83_KAN699-9_2.tif:0001-0070	1.456	136.221	0	790	18.031	7.903	0.8	198.297	15393	1.585	0.631	0.908	1.4141
1055	CEP83_KAN699-9_2.tif:0002-0129	1.61	108.608	0	674	85.702	14.684	0.899	174.889	13576	1.129	0.886	0.919	1.24718
1056	CEP83_KAN699-9_2.tif:0003-0284	1.404	84.165	0	520	6.534	32.244	0.918	118.182	9174	1.022	0.978	0.905	0.842784
1057	CEP83_KAN699-9_2.tif:0004-0397	1.533	105.218	0	506	76.99	45.121	0.933	161.299	12521	1.294	0.773	0.915	1.15026
1058	CEP83_KAN699-9_2.tif:0005-0500	2.564	14.176	0	121	87.171	56.803	0.834	36.341	2821	1.346	0.743	0.886	0.259156
1059	CEP83_KAN699-9_2.tif:0006-0639	1.726	75.791	0	474	68.224	72.61	0.859	130.832	10156	1.404	0.712	0.87	0.932997
1060	CEP83_KAN699-9_2.tif:0007-0647	1.288	107.5	0	657	6.418	73.494	0.981	138.484	10750	1.1	0.909	0.939	0.987566
1061	CEP83_KAN699-9_2.tif:0008-0675	1.662	52.488	0	542	105.16	76.689	0.836	87.226	6771	1.241	0.806	0.884	0.622029
1062	CEP83_KAN699-9_2.tif:0009-0843	1.34	87.346	0	368	92.41	95.757	0.987	117.022	9084	1.158	0.864	0.945	0.834516
1063	CEP83_KAN699-9_2.tif:0010-1100	1.314	64.147	0	227	142.219	124.853	0.834	84.289	6543	1.351	0.74	0.891	0.601083
1064	CEP83_KAN699-9_3.tif:0001-0065	1.791	50.374	0	335	63.932	7.434	0.739	90.202	7002	2.1	0.476	0.888	0.64325
1065	CEP83_KAN699-9_3.tif:0002-0099	1.494	91.267	0	531	109.59	11.268	0.781	136.384	10587	1.722	0.581	0.882	0.972591
1066	CEP83_KAN699-9_3.tif:0003-0102	2.074	112.888	0	775	30.069	11.589	0.816	234.135	18175	1.941	0.515	0.939	1.66968
1067	CEP83_KAN699-9_3.tif:0004-0338	1.353	56.838	0	203	131.279	38.378	0.971	76.881	5968	1.33	0.752	0.909	0.54826
1068	CEP83_KAN699-9_3.tif:0005-0501	1.688	135.16	0	874	85.464	56.833	0.931	228.093	17706	1.177	0.85	0.919	1.62659
1069	CEP83_KAN699-9_3.tif:0006-0644	1.417	56.836	0	186	134.775	73.084	0.899	80.54	6252	1.323	0.756	0.924	0.57435
1070	CEP83_KAN699-9_3.tif:0007-0769	1.417	132.627	0	772	76.813	87.267	0.91	187.939	14589	1.336	0.748	0.94	1.34024
1071	CEP83_KAN699-9_3.tif:0008-0871	2.628	21.838	0	163	86.993	98.88	0.844	57.39	4455	1.266	0.79	0.895	0.409266
1072	CEP83_KAN699-9_3.tif:0009-1011	1.662	102.457	0	613	68.035	114.761	0.858	170.265	13217	1.354	0.739	0.89	1.2142
1073	CEP83_KAN699-9_3.tif:0010-1047	1.585	84.154	0	706	104.943	118.831	0.925	133.344	10351	1.235	0.81	0.914	0.950911
1074	CEP83_KAN699-9_4.tif:0001-0008	1.404	79.404	0	506	130.031	0.919	0.902	111.496	8655	1.292	0.774	0.936	0.795105
1075	CEP83_KAN699-9_4.tif:0002-0059	1.61	77.096	0	202	123.827	6.718	0.925	124.146	9637	1.387	0.721	0.936	0.885318
1076	CEP83_KAN699-9_4.tif:0003-0077	1.391	53.935	0	171	94.882	8.758	0.967	75.039	5825	1.149	0.87	0.919	0.535123
1077	CEP83_KAN699-9_4.tif:0004-0125	1.353	117.705	0	462	74.866	14.265	0.965	159.212	12359	1.115	0.897	0.95	1.13538
1078	CEP83_KAN699-9_4.tif:0005-0185	1.443	152.964	0	1096	55.549	21.047	0.915	220.699	17132	1.221	0.819	0.914	1.57386
1079	CEP83_KAN699-9_4.tif:0006-0296	1.456	131.761	0	920	106.949	33.596	0.908	191.804	14889	1.11	0.901	0.938	1.3678
1080	CEP83_KAN699-9_4.tif:0007-0327	1.34	75.404	0	514	18.192	37.107	0.861	101.023	7842	1.353	0.739	0.92	0.720418
1081	CEP83_KAN699-9_4.tif:0008-0391	2.641	247.444	0	1188	76.059	44.38	0.902	653.465	50726	1.214	0.824	0.93	4.66002
1082	CEP83_KAN699-9_4.tif:0009-0507	1.829	43.556	0	173	92.447	57.572	0.886	79.677	6185	1.549	0.646	0.925	0.568195
1083	CEP83_KAN699-9_4.tif:0010-0548	1.52	119.831	0	651	132.589	62.186	0.909	182.155	14140	1.414	0.707	0.937	1.29899
1084	CEP83_KAN699-9_4.tif:0011-0757	1.829	91.852	0	544	82.991	85.923	0.864	168.023	13043	1.35	0.741	0.899	1.19822
1085	CEP83_KAN699-9_4.tif:0012-0950	1.366	80.189	0	387	14.437	107.726	0.762	109.499	8500	1.499	0.667	0.88	0.780866
1086	CEP83_KAN699-9_4.tif:0013-0956	1.443	113.25	0	714	112.079	108.529	0.955	163.398	12684	1.167	0.857	0.937	1.16524
1087	CEP83_KAN699-9_4.tif:0014-1115	1.572	68.27	0	362	144.296	126.473	0.853	107.296	8329	1.372	0.729	0.914	0.765157
1088	CEP83_KAN699-9_4.tif:0015-1150	1.366	59.557	0	382	57.337	130.537	0.877	81.326	6313	1.286	0.778	0.922	0.579954
1089	CEP83_KAN699-9_5.tif:0001-0035	1.636	105.89	0	838	41.044	3.934	0.878	173.241	13448	1.242	0.805	0.898	1.23542
1090	CEP83_KAN699-9_5.tif:0002-0286	1.34	123.625	0	743	119.162	32.512	0.944	165.627	12857	1.265	0.791	0.924	1.18113
1091	CEP83_KAN699-9_5.tif:0003-0512	1.301	162.663	0	799	19.751	58.117	0.929	211.643	16429	1.264	0.791	0.927	1.50928
1092	CEP83_KAN699-9_5.tif:0004-0751	1.546	59.717	0	437	112.86	85.21	0.941	92.314	7166	1.31	0.763	0.92	0.658316
1093	CEP83_KAN699-9_5.tif:0005-0758	1.494	90.207	0	790	31.537	86.036	0.92	134.8	10464	1.207	0.829	0.935	0.961292
1094	CEP83_KAN699-9_5.tif:0006-0778	1.765	23.876	0	122	138.23	88.294	0.947	42.138	3271	1.365	0.732	0.942	0.300496
1095	CEP83_KAN699-9_5.tif:0007-0782	1.378	178.215	0	699	57.39	88.751	0.941	245.652	19069	1.405	0.712	0.934	1.7518
1096	CEP83_KAN699-9_6.tif:0001-0148	1.675	51.054	0	316	101.41	16.734	0.914	85.5	6637	1.335	0.749	0.919	0.609718
1097	CEP83_KAN699-9_6.tif:0002-0166	1.585	95.984	0	499	142.69	18.927	0.885	152.088	11806	1.297	0.771	0.939	1.08458
1098	CEP83_KAN699-9_6.tif:0003-0278	1.456	95.858	0	369	31.353	31.523	0.896	139.541	10832	1.424	0.702	0.93	0.995099
1099	CEP83_KAN699-9_6.tif:0004-0290	1.675	78.254	0	376	104.337	32.921	0.875	131.051	10173	1.38	0.724	0.909	0.934559
1100	CEP83_KAN699-9_6.tif:0005-0352	1.533	127.756	0	735	88.511	40.024	0.944	195.849	15203	1.25	0.8	0.937	1.39665
1101	CEP83_KAN699-9_6.tif:0006-0448	1.456	171.575	0	1013	136.326	50.916	0.912	249.761	19388	1.416	0.706	0.904	1.78111
1102	CEP83_KAN699-9_6.tif:0007-0591	1.61	164.568	0	710	78.095	67.139	0.889	265.001	20571	1.174	0.851	0.903	1.88979
1103	CEP83_KAN699-9_6.tif:0008-0724	1.34	74.721	0	463	127.387	82.182	0.927	100.108	7771	1.284	0.779	0.95	0.713895
1104	CEP83_KAN699-9_6.tif:0009-0739	1.636	106.063	0	854	68.593	83.97	0.913	173.524	13470	1.406	0.711	0.941	1.23744
1105	CEP83_KAN699-9_6.tif:0010-0776	1.585	115.65	0	620	94.114	88.149	0.885	183.25	14225	1.596	0.626	0.946	1.3068
1106	CEP83_KAN699-9_6.tif:0011-0886	1.443	103.429	0	847	123.145	100.525	0.899	149.228	11584	1.365	0.733	0.941	1.06418
										11133.4				1.02279
1	CEP83_KAN699-10_1.tif:0001-0082	1.572	49.025	0	220	26.717	9.35	0.929	77.049	5981	1.287	0.777	0.924	0.549454
2	CEP83_KAN699-10_1.tif:0002-0276	2.77	20.247	0	90	132.274	31.394	0.882	56.076	4353	1.395	0.717	0.925	0.399895
3	CEP83_KAN699-10_1.tif:0003-0275	1.572	76.656	0	580	74.574	31.317	0.956	120.475	9352	1.175	0.851	0.928	0.859136
4	CEP83_KAN699-10_1.tif:0004-0395	1.855	69.958	0	644	124.773	44.87	0.876	129.776	10074	1.48	0.676	0.917	0.925464
5	CEP83_KAN699-10_1.tif:0005-0435	1.378	51.505	0	174	62.294	49.302	0.929	70.994	5511	1.183	0.845	0.911	0.506277
6	CEP83_KAN699-10_1.tif:0006-0728	1.443	39.679	0	154	118.984	82.7	0.754	57.249	4444	2.02	0.495	0.878	0.408255
7	CEP83_KAN699-10_1.tif:0007-0760	1.417	117.655	0	550	95.882	86.284	0.91	166.722	12942	1.311	0.763	0.936	1.18894
8	CEP83_KAN699-10_1.tif:0008-0803	1.443	76.295	0	447	58.865	91.103	0.889	110.079	8545	1.437	0.696	0.933	0.785
9	CEP83_KAN699-10_1.tif:0009-0867	1.288	75.19	0	426	25.595	98.488	0.868	96.862	7519	1.237	0.808	0.889	0.690745
10	CEP83_KAN699-10_2.tif:0001-0022	1.469	59.114	0	419	128.698	2.513	0.96	86.813	6739	1.023	0.977	0.927	0.619089
11	CEP83_KAN699-10_2.tif:0002-0202	1.572	137.213	0	650	44.555	22.886	0.903	215.649	16740	1.11	0.901	0.928	1.53785
12	CEP83_KAN699-10_2.tif:0003-0355	1.546	92.133	0	424	100.555	40.301	0.914	142.426	11056	1.261	0.793	0.916	1.01568
13	CEP83_KAN699-10_2.tif:0004-0375	1.791	60.295	0	137	75.756	42.632	0.824	107.966	8381	1.714	0.583	0.908	0.769934
14	CEP83_KAN699-10_2.tif:0005-0419	1.314	17.794	0	140	45.179	47.542	0.859	23.381	1815	1.563	0.64	0.891	0.166738
15	CEP83_KAN699-10_2.tif:0006-0537	1.404	17.275	0	58	141.346	61.057	0.83	24.257	1883	1.633	0.612	0.908	0.172985
16	CEP83_KAN699-10_2.tif:0007-0607	1.726	73.813	0	524	20.708	68.856	0.836	127.418	9891	1.456	0.687	0.899	0.908652
17	CEP83_KAN699-10_2.tif:0008-0608	1.378	159.299	0	867	71.966	69.054	0.941	219.578	17045	1.203	0.831	0.926	1.56587
18	CEP83_KAN699-10_2.tif:0009-0626	1.378	72.355	0	461	119.709	71.147	0.971	99.734	7742	1.211	0.826	0.934	0.711231
19	CEP83_KAN699-10_2.tif:0010-0656	1.765	40.124	0	161	18.271	74.472	0.937	70.814	5497	1.343	0.745	0.932	0.504991
20	CEP83_KAN699-10_2.tif:0011-0782	1.314	82.98	0	430	35.245	88.814	0.926	109.035	8464	1.357	0.737	0.927	0.777559
21	CEP83_KAN699-10_2.tif:0012-0796	1.649	106.148	0	579	75.873	90.402	0.936	175.031	13587	1.174	0.852	0.911	1.24819
22	CEP83_KAN699-10_2.tif:0013-0891	1.327	88.583	0	743	58.117	101.146	0.827	117.538	9124	1.498	0.667	0.916	0.838191
23	CEP83_KAN699-10_2.tif:0014-1014	1.353	6.752	0	25	82.764	115.176	0.953	9.134	709	1.252	0.799	0.929	0.0651334
24	CEP83_KAN699-10_2.tif:0015-1084	1.945	15.828	0	89	69.499	123.078	0.877	30.789	2390	1.053	0.949	0.883	0.219561
25	CEP83_KAN699-10_3.tif:0001-0052	1.469	120.105	0	1022	108.849	5.885	0.878	176.384	13692	1.502	0.666	0.927	1.25784
26	CEP83_KAN699-10_3.tif:0002-0435	1.52	101.008	0	836	108.396	49.386	0.936	153.544	11919	1.204	0.831	0.937	1.09496
27	CEP83_KAN699-10_3.tif:0003-0521	1.443	84.795	0	278	61.959	59.18	0.915	122.343	9497	1.385	0.722	0.926	0.872457
28	CEP83_KAN699-10_3.tif:0004-0591	1.469	94.43	0	726	118.975	67.169	0.82	138.677	10765	1.916	0.522	0.919	0.988944
29	CEP83_KAN699-10_3.tif:0005-0790	1.417	76.109	0	459	52.558	89.72	0.915	107.85	8372	1.244	0.804	0.898	0.769107
30	CEP83_KAN699-10_3.tif:0006-0789	1.353	96.495	0	523	140.044	89.541	0.924	130.523	10132	1.283	0.78	0.925	0.930792
31	CEP83_KAN699-10_3.tif:0007-0914	1.43	93.667	0	564	102.439	103.824	0.907	133.937	10397	1.34	0.746	0.906	0.955137
32	CEP83_KAN699-10_3.tif:0008-0938	1.366	96.17	0	666	49.22	106.553	0.944	131.322	10194	1.098	0.911	0.946	0.936488
33	CEP83_KAN699-10_4.tif:0001-0070	1.469	111.368	0	678	100.145	7.951	0.904	163.553	12696	1.451	0.689	0.927	1.16634
34	CEP83_KAN699-10_4.tif:0002-0107	1.404	144.358	0	492	117.749	12.171	0.891	202.702	15735	1.313	0.762	0.905	1.44552
35	CEP83_KAN699-10_4.tif:0003-0119	1.533	91.445	0	458	28.565	13.548	0.917	140.185	10882	1.224	0.817	0.933	0.999692
36	CEP83_KAN699-10_4.tif:0004-0298	2.924	24.982	0	188	32.765	33.873	0.86	73.055	5671	1.361	0.735	0.899	0.520975
37	CEP83_KAN699-10_4.tif:0005-0331	1.378	129.523	0	625	130.976	37.564	0.913	178.535	13859	1.352	0.74	0.934	1.27318
38	CEP83_KAN699-10_4.tif:0006-0337	1.481	103.096	0	473	116.567	38.354	0.901	152.732	11856	1.363	0.734	0.906	1.08917
39	CEP83_KAN699-10_4.tif:0007-0420	1.636	119.362	0	707	103.526	47.679	0.903	195.282	15159	1.407	0.711	0.924	1.39261
40	CEP83_KAN699-10_4.tif:0008-0558	1.649	129.797	0	799	86.926	63.369	0.816	214.026	16614	1.785	0.56	0.924	1.52627
41	CEP83_KAN699-10_4.tif:0009-0639	1.353	105.552	0	382	106.852	72.582	0.935	142.774	11083	1.192	0.839	0.946	1.01816
42	CEP83_KAN699-10_4.tif:0010-0879	1.353	95.657	0	606	64.604	99.833	0.896	129.389	10044	1.304	0.767	0.921	0.922708
43	CEP83_KAN699-10_4.tif:0011-0934	2.538	21.766	0	142	45.603	106.077	0.87	55.239	4288	1.028	0.973	0.885	0.393924
44	CEP83_KAN699-10_4.tif:0012-0965	1.572	71.779	0	301	93.945	109.404	0.688	112.81	8757	1.616	0.619	0.853	0.804476
45	CEP83_KAN699-10_4.tif:0013-0988	1.507	100.624	0	594	127.471	112.128	0.818	151.663	11773	1.567	0.638	0.907	1.08155
46	CEP83_KAN699-10_4.tif:0014-1086	1.288	73.92	0	476	29.754	123.256	0.937	95.226	7392	1.364	0.733	0.913	0.679078
47	CEP83_KAN699-10_4.tif:0015-1112	1.314	62.353	0	379	60.402	126.214	0.938	81.931	6360	1.222	0.818	0.94	0.584271
48	CEP83_KAN699-10_5.tif:0001-0060	1.34	70.635	0	288	77.073	6.754	0.944	94.633	7346	1.277	0.783	0.937	0.674852
49	CEP83_KAN699-10_5.tif:0002-0314	1.546	56.358	0	161	85.591	35.727	0.777	87.123	6763	1.619	0.618	0.863	0.621294
50	CEP83_KAN699-10_5.tif:0003-0374	1.507	88.88	0	514	116.228	42.441	0.928	133.963	10399	1.333	0.75	0.936	0.955321
51	CEP83_KAN699-10_5.tif:0004-0402	1.546	104.075	0	605	40.825	45.679	0.888	160.886	12489	1.17	0.855	0.909	1.14732
52	CEP83_KAN699-10_5.tif:0005-0559	1.443	107.491	0	648	70.843	63.462	0.915	155.089	12039	1.414	0.707	0.941	1.10598
53	CEP83_KAN699-10_5.tif:0006-0723	1.61	107.568	0	493	20.158	82.059	0.874	173.215	13446	1.392	0.718	0.923	1.23524
54	CEP83_KAN699-10_5.tif:0007-0820	1.314	50.892	0	240	50.751	93.067	0.926	66.872	5191	1.293	0.773	0.919	0.476879
55	CEP83_KAN699-10_5.tif:0008-0880	2.795	15.802	0	123	31.447	99.984	0.747	44.173	3429	1.207	0.829	0.853	0.31501
56	CEP83_KAN699-10_5.tif:0009-0986	1.456	71.752	0	395	91.9	112.046	0.822	104.449	8108	1.685	0.593	0.934	0.744854
57	CEP83_KAN699-10_6.tif:0001-0021	1.417	43.218	0	190	8.096	2.499	0.74	61.242	4754	1.691	0.591	0.837	0.436734
58	CEP83_KAN699-10_6.tif:0002-0192	1.366	76.821	0	173	55.382	21.802	1	104.9	8143	1.215	0.823	0.955	0.74807
59	CEP83_KAN699-10_6.tif:0003-0282	1.443	42.482	0	152	85.737	31.979	0.932	61.294	4758	1.422	0.703	0.914	0.437101
60	CEP83_KAN699-10_6.tif:0004-0404	1.391	132.676	0	915	79.074	45.952	0.921	184.59	14329	1.319	0.758	0.943	1.31636
61	CEP83_KAN699-10_6.tif:0005-0486	1.469	105.553	0	649	119.053	55.226	0.843	155.012	12033	1.461	0.685	0.88	1.10543
62	CEP83_KAN699-10_6.tif:0006-0571	1.34	37.067	0	347	62.283	64.811	0.915	49.661	3855	1.376	0.727	0.916	0.354146
63	CEP83_KAN699-10_6.tif:0007-0810	1.507	68.333	0	585	63.045	91.909	0.94	102.994	7995	1.332	0.751	0.963	0.734473
64	CEP83_KAN699-10_6.tif:0008-0874	1.572	80.467	0	496	140.83	99.255	0.903	126.465	9817	1.391	0.719	0.928	0.901854
65	CEP83_KAN699-10_6.tif:0009-1025	1.301	39.614	0	141	42.686	116.428	0.917	51.542	4001	1.244	0.804	0.91	0.367558
66	CEP83_KAN699-10_6.tif:0010-1082	1.288	48.97	0	300	10.576	122.807	0.88	63.084	4897	1.41	0.709	0.909	0.449871
67	CEP83_KAN699-10_6.tif:0011-1230	1.378	101.364	0	706	86.813	139.635	0.971	139.721	10846	1.03	0.971	0.93	0.996385
										8978.49				0.824823
68	CEP83_KAN699-11_1.tif:0001-0042	1.533	45.487	0	226	119.718	4.762	0.846	69.732	5413	1.591	0.628	0.905	0.497274
69	CEP83_KAN699-11_1.tif:0002-0116	1.546	80.25	0	439	92.856	13.207	0.925	124.056	9630	1.04	0.961	0.93	0.884675
70	CEP83_KAN699-11_1.tif:0003-0205	1.391	109.509	0	440	69.172	23.235	0.95	152.358	11827	1.317	0.759	0.935	1.08651
71	CEP83_KAN699-11_1.tif:0004-0225	1.353	112.838	0	548	78.01	25.6	0.869	152.629	11848	1.586	0.63	0.938	1.08844
72	CEP83_KAN699-11_1.tif:0005-0234	1.778	45.486	0	365	103.792	26.539	0.693	80.862	6277	1.96	0.51	0.824	0.576647
73	CEP83_KAN699-11_1.tif:0006-0283	1.391	65.944	0	326	36.132	32.118	0.921	91.747	7122	1.337	0.748	0.931	0.654274
74	CEP83_KAN699-11_1.tif:0007-0311	1.404	77	0	542	10.914	35.298	0.93	108.121	8393	1.159	0.863	0.928	0.771036
75	CEP83_KAN699-11_1.tif:0008-0315	1.507	141.427	0	894	72.401	35.712	0.928	213.163	16547	1.186	0.843	0.932	1.52012
76	CEP83_KAN699-11_1.tif:0009-0483	1.597	107.129	0	749	142.251	54.837	0.825	171.128	13284	1.776	0.563	0.899	1.22036
77	CEP83_KAN699-11_1.tif:0010-0664	1.34	77.904	0	519	50.108	75.367	0.85	104.372	8102	1.462	0.684	0.897	0.744303
78	CEP83_KAN699-11_1.tif:0011-0668	1.623	96.976	0	837	90.037	75.845	0.858	157.408	12219	1.605	0.623	0.933	1.12252
79	CEP83_KAN699-11_1.tif:0012-0715	1.456	68.832	0	267	36.387	81.188	0.923	100.198	7778	1.101	0.908	0.915	0.714538
80	CEP83_KAN699-11_1.tif:0013-0734	1.366	82.972	0	671	74.825	83.382	0.904	113.299	8795	1.28	0.781	0.934	0.807967
81	CEP83_KAN699-11_1.tif:0014-0759	1.597	76.113	0	577	124.363	86.209	0.882	121.583	9438	1.432	0.698	0.922	0.867037
82	CEP83_KAN699-11_1.tif:0015-0855	2.512	29.979	0	166	119.707	97.04	0.88	75.31	5846	1.185	0.844	0.897	0.537052
83	CEP83_KAN699-11_1.tif:0016-0943	1.52	49.975	0	222	78.608	107.063	0.936	75.967	5897	1.246	0.802	0.944	0.541737
84	CEP83_KAN699-11_1.tif:0017-1023	1.623	41.992	0	388	112.86	116.094	0.838	68.16	5291	1.669	0.599	0.913	0.486066
85	CEP83_KAN699-11_2.tif:0001-0034	1.456	73.947	0	372	126.59	3.868	0.886	107.644	8356	1.575	0.635	0.908	0.767637
86	CEP83_KAN699-11_2.tif:0002-0084	1.417	131.145	0	557	59.098	9.534	0.938	185.839	14426	1.309	0.764	0.944	1.32527
87	CEP83_KAN699-11_2.tif:0003-0130	1.456	76.867	0	542	7.78	14.764	0.813	111.895	8686	1.672	0.598	0.883	0.797953
88	CEP83_KAN699-11_2.tif:0004-0211	2.164	27.345	0	153	18.609	24.021	0.961	59.181	4594	1.348	0.742	0.941	0.422035
89	CEP83_KAN699-11_2.tif:0005-0213	1.327	98.068	0	405	120.371	24.169	0.878	130.124	10101	1.453	0.688	0.907	0.927944
90	CEP83_KAN699-11_2.tif:0006-0426	1.636	49.039	0	252	85.807	48.316	0.801	80.231	6228	1.137	0.879	0.861	0.572145
91	CEP83_KAN699-11_2.tif:0007-0437	1.404	101.917	0	627	40.004	49.622	0.918	143.109	11109	1.191	0.84	0.92	1.02055
92	CEP83_KAN699-11_2.tif:0008-0498	1.572	108.041	0	612	135.659	56.599	0.877	169.801	13181	1.495	0.669	0.924	1.21089
93	CEP83_KAN699-11_2.tif:0009-0565	1.378	48.178	0	319	45.68	64.182	0.885	66.408	5155	1.349	0.741	0.93	0.473572
94	CEP83_KAN699-11_2.tif:0010-0679	1.546	127.633	0	611	98.27	77.047	0.898	197.305	15316	1.12	0.893	0.93	1.40703
95	CEP83_KAN699-11_2.tif:0011-0697	1.353	9.933	0	56	18.835	79.132	0.858	13.436	1043	1.696	0.589	0.913	0.0958168
96	CEP83_KAN699-11_2.tif:0012-0913	1.366	51.858	0	194	118.651	103.674	0.733	70.814	5497	2.181	0.459	0.865	0.504991
97	CEP83_KAN699-11_2.tif:0013-0920	1.327	114.408	0	657	127.265	104.44	0.947	151.804	11784	1.252	0.798	0.954	1.08256
98	CEP83_KAN699-11_2.tif:0014-0947	1.327	125.233	0	712	81.468	107.589	0.918	166.168	12899	1.159	0.863	0.936	1.18499
99	CEP83_KAN699-11_2.tif:0015-0957	1.404	95.119	0	352	50.459	108.592	0.93	133.563	10368	1.303	0.767	0.94	0.952473
100	CEP83_KAN699-11_3.tif:0001-0061	2.151	38.988	0	182	89.814	6.986	0.891	83.876	6511	1.182	0.846	0.903	0.598143
101	CEP83_KAN699-11_3.tif:0002-0075	1.391	60.269	0	304	71.22	8.469	0.857	83.851	6509	1.506	0.664	0.911	0.59796
102	CEP83_KAN699-11_3.tif:0003-0093	1.7	28.629	0	94	44.368	10.569	0.811	48.682	3779	1.746	0.573	0.904	0.347164
103	CEP83_KAN699-11_3.tif:0004-0111	1.572	138.205	0	1008	42.028	12.661	0.929	217.208	16861	1.311	0.763	0.921	1.54896
104	CEP83_KAN699-11_3.tif:0005-0191	1.675	72.615	0	420	7.761	21.613	0.715	121.608	9440	1.851	0.54	0.839	0.86722
105	CEP83_KAN699-11_3.tif:0006-0230	1.288	93.74	0	599	34.279	26.12	0.937	120.758	9374	1.369	0.73	0.922	0.861157
106	CEP83_KAN699-11_3.tif:0007-0271	1.726	82.784	0	278	129.072	30.907	0.679	142.903	11093	2.008	0.498	0.865	1.01908
107	CEP83_KAN699-11_3.tif:0008-0438	1.623	96.008	0	517	17.348	49.718	0.848	155.837	12097	1.383	0.723	0.897	1.11131
108	CEP83_KAN699-11_3.tif:0009-0479	1.288	58.5	0	208	52.826	54.438	0.949	75.361	5850	1.019	0.981	0.926	0.537419
109	CEP83_KAN699-11_3.tif:0010-0548	2.216	15.564	0	98	44.764	62.18	0.909	34.486	2677	1.142	0.876	0.894	0.245927
110	CEP83_KAN699-11_3.tif:0011-0593	2.177	68.651	0	303	120.564	67.421	0.723	149.46	11602	2.119	0.472	0.867	1.06584
111	CEP83_KAN699-11_3.tif:0012-0612	1.752	173.978	0	1288	95.936	69.471	0.881	304.807	23661	1.497	0.668	0.925	2.17366
112	CEP83_KAN699-11_3.tif:0013-0679	1.481	104.896	0	915	70.369	77.175	0.912	155.399	12063	1.264	0.791	0.931	1.10819
113	CEP83_KAN699-11_3.tif:0014-0757	1.417	111.191	0	759	108.52	85.924	0.873	157.563	12231	1.553	0.644	0.905	1.12362
114	CEP83_KAN699-11_3.tif:0015-0829	1.61	89.12	0	477	35.585	94.066	0.925	143.508	11140	1.154	0.867	0.919	1.02339
115	CEP83_KAN699-11_3.tif:0016-0901	1.494	106.655	0	675	43.491	102.332	0.883	159.379	12372	1.527	0.655	0.924	1.13657
116	CEP83_KAN699-11_3.tif:0017-0996	1.288	21.59	0	199	13.05	113.021	0.907	27.813	2159	1.375	0.727	0.905	0.19834
117	CEP83_KAN699-11_3.tif:0018-1080	1.507	81.855	0	469	94.37	122.625	0.917	123.373	9577	1.337	0.748	0.918	0.879806
118	CEP83_KAN699-11_4.tif:0001-0053	1.842	12.357	0	56	4.379	6.067	0.902	22.763	1767	1.281	0.781	0.932	0.162328
119	CEP83_KAN699-11_4.tif:0002-0245	1.443	71.786	0	409	111.445	27.851	0.863	103.573	8040	1.463	0.684	0.918	0.738607
120	CEP83_KAN699-11_4.tif:0003-0255	1.855	71.326	0	566	137.078	29.004	0.832	132.314	10271	1.435	0.697	0.906	0.943562
121	CEP83_KAN699-11_4.tif:0004-0257	1.688	69.382	0	288	9.374	29.138	0.872	117.087	9089	1.545	0.647	0.897	0.834975
122	CEP83_KAN699-11_4.tif:0005-0390	1.623	117.056	0	718	87.12	44.253	0.937	190	14749	1.205	0.83	0.903	1.35494
123	CEP83_KAN699-11_4.tif:0006-0466	1.456	88.858	0	463	22.12	52.932	0.846	129.351	10041	1.48	0.676	0.919	0.922432
124	CEP83_KAN699-11_4.tif:0007-0543	1.456	79.611	0	346	86.61	61.66	0.896	115.889	8996	1.176	0.851	0.911	0.826432
125	CEP83_KAN699-11_4.tif:0008-0611	1.52	63.339	0	198	118.472	69.306	0.925	96.282	7474	1.081	0.925	0.901	0.686611
126	CEP83_KAN699-11_4.tif:0009-0616	1.507	69.957	0	395	57.636	69.964	0.917	105.441	8185	1.323	0.756	0.9	0.751928
127	CEP83_KAN699-11_4.tif:0010-0703	1.533	58.622	0	198	28.024	79.82	0.81	89.867	6976	1.759	0.568	0.915	0.640861
128	CEP83_KAN699-11_4.tif:0011-0809	1.314	39.569	0	145	134.944	91.901	0.897	51.993	4036	1.116	0.896	0.907	0.370774
129	CEP83_KAN699-11_4.tif:0012-0835	1.314	85.069	0	414	111.736	94.797	0.938	111.779	8677	1.072	0.933	0.94	0.797126
130	CEP83_KAN699-11_4.tif:0013-1022	1.417	40.391	0	268	112.95	115.965	0.823	57.236	4443	1.549	0.645	0.905	0.408163
131	CEP83_KAN699-11_4.tif:0014-1235	1.301	49.515	0	190	114.567	140.189	0.851	64.424	5001	1.51	0.662	0.894	0.459425
132	CEP83_KAN699-11_5.tif:0001-0034	1.842	111.727	0	717	58.381	3.721	0.818	205.82	15977	1.491	0.671	0.897	1.46775
133	CEP83_KAN699-11_5.tif:0002-0119	1.778	39.442	0	199	52.652	13.517	0.726	70.118	5443	1.568	0.638	0.852	0.50003
134	CEP83_KAN699-11_5.tif:0003-0143	1.868	52.221	0	230	45.523	16.3	0.895	97.544	7572	1.381	0.724	0.903	0.695614
135	CEP83_KAN699-11_5.tif:0004-0167	1.816	70.007	0	243	100.158	18.96	0.787	127.161	9871	1.713	0.584	0.879	0.906815
136	CEP83_KAN699-11_5.tif:0005-0276	1.417	72.418	0	675	126.596	31.385	0.91	102.62	7966	1.214	0.824	0.928	0.731809
137	CEP83_KAN699-11_5.tif:0006-0284	1.366	114.302	0	803	104.398	32.344	0.851	156.081	12116	1.2	0.833	0.93	1.11306
138	CEP83_KAN699-11_5.tif:0007-0359	1.804	123.25	0	972	92.331	40.798	0.874	222.283	17255	1.254	0.797	0.903	1.58516
139	CEP83_KAN699-11_5.tif:0008-0442	1.34	93.288	0	552	57.65	50.237	0.887	124.984	9702	1.592	0.628	0.924	0.89129
140	CEP83_KAN699-11_5.tif:0009-0522	1.546	113.742	0	678	142.737	59.347	0.808	175.83	13649	1.819	0.55	0.92	1.25389
141	CEP83_KAN699-11_5.tif:0010-0591	1.314	112.637	0	463	14.804	67.142	0.87	148.004	11489	1.591	0.629	0.919	1.05546
142	CEP83_KAN699-11_5.tif:0011-0719	1.61	66.416	0	223	28.595	81.602	0.879	106.948	8302	1.52	0.658	0.912	0.762676
143	CEP83_KAN699-11_5.tif:0012-0719	1.597	127.516	0	698	59.501	81.64	0.858	203.694	15812	1.408	0.71	0.895	1.45259
144	CEP83_KAN699-11_5.tif:0013-0900	1.327	79.233	0	228	41.615	102.142	0.935	105.132	8161	1.283	0.779	0.924	0.749723
145	CEP83_KAN699-11_5.tif:0014-0931	1.353	65.086	0	412	19.914	105.654	0.912	88.037	6834	1.473	0.679	0.905	0.627816
146	CEP83_KAN699-11_5.tif:0015-1021	1.61	96.944	0	712	92.064	116	0.914	156.107	12118	1.418	0.705	0.923	1.11324
147	CEP83_KAN699-11_5.tif:0016-1134	2.048	100.862	0	584	50.781	128.685	0.762	206.593	16037	1.49	0.671	0.881	1.47326
148	CEP83_KAN699-11_6.tif:0001-0083	1.546	102.417	0	729	131.406	9.405	0.888	158.323	12290	1.158	0.863	0.902	1.12904
149	CEP83_KAN699-11_6.tif:0002-0239	1.61	117.104	0	790	105.35	27.251	0.864	188.57	14638	1.092	0.916	0.893	1.34474
150	CEP83_KAN699-11_6.tif:0003-0273	1.378	74.196	0	429	67.033	31.036	0.913	102.272	7939	1.122	0.891	0.922	0.729329
151	CEP83_KAN699-11_6.tif:0004-0359	1.417	86.945	0	524	11.283	40.765	0.684	123.206	9564	2.352	0.425	0.884	0.878612
152	CEP83_KAN699-11_6.tif:0005-0452	1.353	93.419	0	566	38.426	51.306	0.924	126.362	9809	1.347	0.742	0.929	0.901119
153	CEP83_KAN699-11_6.tif:0006-0572	1.597	144.29	0	949	93.829	65	0.955	230.489	17892	1.212	0.825	0.958	1.64368
154	CEP83_KAN699-11_6.tif:0007-0724	1.469	85.658	0	678	101.73	82.2	0.96	125.795	9765	1.235	0.809	0.927	0.897077
155	CEP83_KAN699-11_6.tif:0008-0767	1.778	96.783	0	580	144.063	87.051	0.894	172.055	13356	1.376	0.727	0.926	1.22697
156	CEP83_KAN699-11_6.tif:0009-0889	1.366	76.302	0	415	77.573	100.963	0.975	104.192	8088	1.056	0.947	0.951	0.743017
157	CEP83_KAN699-11_6.tif:0010-1021	1.52	131.585	0	1029	96.493	115.868	0.873	200.023	15527	1.519	0.658	0.929	1.42641
158	CEP83_KAN699-11_6.tif:0011-1036	1.688	12.252	0	72	94.765	117.45	0.742	20.676	1605	1.214	0.824	0.811	0.147446
159	CEP83_KAN699-11_6.tif:0012-1236	1.327	77.99	0	227	84.835	140.277	0.935	103.483	8033	1.192	0.839	0.907	0.737964
										9785.27				0.898939
160	CEP83_KAN699-12_1.tif:0001-0162	1.327	17.223	0	133	131.359	18.384	0.878	22.853	1774	1.584	0.631	0.932	0.162971
161	CEP83_KAN699-12_1.tif:0002-0202	1.816	96.177	0	543	40.377	22.911	0.815	174.696	13561	1.671	0.598	0.898	1.2458
162	CEP83_KAN699-12_1.tif:0003-0381	2.023	56.229	0	407	62.411	43.27	0.826	113.725	8828	1.609	0.621	0.91	0.810998
163	CEP83_KAN699-12_1.tif:0004-0425	1.829	120.775	0	991	102.594	48.177	0.851	220.931	17150	1.331	0.751	0.902	1.57551
164	CEP83_KAN699-12_1.tif:0005-0636	1.945	146.795	0	1058	138.234	72.176	0.851	285.548	22166	1.464	0.683	0.924	2.03631
165	CEP83_KAN699-12_1.tif:0006-0686	1.366	138.226	0	771	71.611	77.892	0.904	188.751	14652	1.185	0.844	0.918	1.34603
166	CEP83_KAN699-12_1.tif:0007-0754	1.726	25.194	0	112	47.214	85.46	0.748	43.49	3376	1.9	0.526	0.873	0.310142
167	CEP83_KAN699-12_1.tif:0008-0841	1.688	116.481	0	675	3.447	95.42	0.768	196.57	15259	1.628	0.614	0.851	1.40179
168	CEP83_KAN699-12_1.tif:0009-0885	1.791	61.273	0	324	108.019	100.347	0.854	109.718	8517	1.166	0.857	0.921	0.782428
169	CEP83_KAN699-12_1.tif:0010-0946	1.43	33.333	0	252	128.848	107.381	0.907	47.664	3700	1.343	0.745	0.902	0.339906
170	CEP83_KAN699-12_2.tif:0001-0021	1.43	105.432	0	405	48.703	2.431	0.881	150.761	11703	1.269	0.788	0.899	1.07511
171	CEP83_KAN699-12_2.tif:0002-0161	2.357	34.361	0	148	37.316	18.351	0.901	81.004	6288	1.181	0.847	0.915	0.577657
172	CEP83_KAN699-12_2.tif:0003-0191	1.688	76.962	0	553	113.928	21.726	0.849	129.879	10082	1.116	0.896	0.885	0.926199
173	CEP83_KAN699-12_2.tif:0004-0306	2.074	135.683	0	970	50.152	34.674	0.764	281.413	21845	1.947	0.514	0.89	2.00683
174	CEP83_KAN699-12_2.tif:0005-0376	1.34	93.99	0	371	18.875	42.711	0.915	125.924	9775	1.302	0.768	0.916	0.897996
175	CEP83_KAN699-12_2.tif:0006-0564	2.074	23.404	0	161	10.729	64.059	0.819	48.54	3768	1.57	0.637	0.892	0.346153
176	CEP83_KAN699-12_2.tif:0007-0644	2.023	84.987	0	959	111.704	73.069	0.807	171.888	13343	1.404	0.712	0.892	1.22578
177	CEP83_KAN699-12_2.tif:0008-0785	1.765	86.504	0	656	41.458	89.196	0.888	152.668	11851	1.458	0.686	0.919	1.08871
178	CEP83_KAN699-12_2.tif:0009-0823	1.623	104.103	0	413	98.371	93.473	0.988	168.976	13117	1.261	0.793	0.94	1.20501
179	CEP83_KAN699-12_2.tif:0010-1010	2.035	101.905	0	958	98.781	114.653	0.869	207.417	16101	1.353	0.739	0.935	1.47914
180	CEP83_KAN699-12_2.tif:0011-1111	1.597	88.371	0	518	132.959	126.156	0.944	141.164	10958	1.307	0.765	0.929	1.00667
181	CEP83_KAN699-12_2.tif:0012-1169	1.34	48.115	0	210	89.103	132.748	0.956	64.463	5004	1.194	0.837	0.95	0.4597
182	CEP83_KAN699-12_2.tif:0013-1185	1.378	85.542	0	489	38.456	134.531	0.874	117.911	9153	1.125	0.889	0.895	0.840855
183	CEP83_KAN699-12_3.tif:0001-0058	1.636	47.748	0	205	103.571	6.575	0.81	78.118	6064	1.858	0.538	0.93	0.557079
184	CEP83_KAN699-12_3.tif:0002-0112	1.688	128.878	0	731	57.314	12.649	0.892	217.491	16883	1.266	0.79	0.946	1.55098
185	CEP83_KAN699-12_3.tif:0003-0197	1.417	92.345	0	585	41.138	22.352	0.915	130.858	10158	1.146	0.872	0.887	0.933181
186	CEP83_KAN699-12_3.tif:0004-0303	1.585	39.927	0	586	18.466	34.465	0.936	63.265	4911	1.164	0.859	0.921	0.451157
187	CEP83_KAN699-12_3.tif:0005-0325	1.52	88.831	0	649	70.101	36.879	0.839	135.032	10482	1.403	0.713	0.894	0.962945
188	CEP83_KAN699-12_3.tif:0006-0385	1.726	100.067	0	698	102.279	43.697	0.845	172.738	13409	1.382	0.723	0.893	1.23184
189	CEP83_KAN699-12_3.tif:0007-0448	1.52	111.271	0	669	50.466	50.81	0.936	169.144	13130	1.085	0.921	0.929	1.20621
190	CEP83_KAN699-12_3.tif:0008-0503	1.327	39.748	0	375	29.577	57.097	0.996	52.74	4094	1.155	0.866	0.928	0.376102
191	CEP83_KAN699-12_3.tif:0009-0632	1.649	79.688	0	639	137.111	71.781	0.775	131.399	10200	1.914	0.522	0.914	0.937039
192	CEP83_KAN699-12_3.tif:0010-0662	1.662	107.628	0	922	13.795	75.106	0.868	178.857	13884	1.268	0.789	0.902	1.27548
193	CEP83_KAN699-12_3.tif:0011-0710	1.597	79.589	0	610	68.246	80.59	0.944	127.135	9869	1.126	0.888	0.912	0.906631
194	CEP83_KAN699-12_3.tif:0012-0830	1.404	84.963	0	465	1.77	94.187	0.85	119.303	9261	1.176	0.85	0.924	0.850776
195	CEP83_KAN699-12_3.tif:0013-0951	2.654	20.189	0	132	4.444	108.02	0.794	53.577	4159	1.065	0.939	0.873	0.382073
196	CEP83_KAN699-12_3.tif:0014-1026	1.688	97.473	0	721	45.706	116.386	0.777	164.493	12769	1.629	0.614	0.87	1.17304
197	CEP83_KAN699-12_3.tif:0015-1033	1.443	22.857	0	169	30.57	117.304	0.943	32.979	2560	1.164	0.859	0.918	0.235178
198	CEP83_KAN699-12_3.tif:0016-1044	1.546	83.075	0	766	127.718	118.54	0.877	128.423	9969	1.297	0.771	0.882	0.915818
199	CEP83_KAN699-12_3.tif:0017-1171	1.391	35.454	0	235	66.256	132.985	0.967	49.326	3829	1.204	0.831	0.923	0.351757
200	CEP83_KAN699-12_4.tif:0001-0111	1.494	81.905	0	332	44.023	12.584	0.811	122.394	9501	1.635	0.612	0.899	0.872824
201	CEP83_KAN699-12_4.tif:0002-0119	1.443	87.179	0	540	143.305	13.565	0.915	125.782	9764	1.181	0.847	0.918	0.896985
202	CEP83_KAN699-12_4.tif:0003-0155	1.546	93.533	0	383	89.768	17.573	0.863	144.59	11224	1.092	0.915	0.909	1.03111
203	CEP83_KAN699-12_4.tif:0004-0248	1.34	41.26	0	178	130.998	28.149	0.876	55.278	4291	1.368	0.731	0.9	0.394199
204	CEP83_KAN699-12_4.tif:0005-0277	1.443	91.188	0	548	34.038	31.412	0.829	131.566	10213	1.135	0.881	0.865	0.938233
205	CEP83_KAN699-12_4.tif:0006-0330	1.507	90.291	0	750	91.402	37.584	0.832	136.088	10564	1.239	0.807	0.873	0.970479
206	CEP83_KAN699-12_4.tif:0007-0380	1.791	103.489	0	628	55.961	43.126	0.925	185.311	14385	1.176	0.85	0.921	1.3215
207	CEP83_KAN699-12_4.tif:0008-0560	1.585	123.951	0	749	134.467	63.51	0.828	196.403	15246	1.573	0.636	0.908	1.4006
208	CEP83_KAN699-12_4.tif:0009-0570	2.576	34.615	0	282	52.149	64.673	0.891	89.184	6923	1.254	0.797	0.911	0.635992
209	CEP83_KAN699-12_4.tif:0010-0599	1.585	99.374	0	650	65.766	68.036	0.851	157.46	12223	1.465	0.682	0.895	1.12289
210	CEP83_KAN699-12_4.tif:0011-0600	1.417	58.073	0	303	105.455	68.202	0.938	82.292	6388	1.111	0.9	0.936	0.586844
211	CEP83_KAN699-12_4.tif:0012-0814	1.494	64.259	0	472	20.187	92.374	0.883	96.024	7454	1.139	0.878	0.899	0.684773
212	CEP83_KAN699-12_4.tif:0013-0962	1.546	92.867	0	584	128.828	109.219	0.941	143.56	11144	1.17	0.854	0.92	1.02376
213	CEP83_KAN699-12_4.tif:0014-0981	1.507	93.145	0	671	107.836	111.447	0.866	140.391	10898	1.24	0.806	0.918	1.00116
214	CEP83_KAN699-12_4.tif:0015-1182	1.353	28.914	0	385	137.08	134.227	0.858	39.111	3036	1.561	0.641	0.913	0.278907
215	CEP83_KAN699-12_5.tif:0001-0202	1.778	90.659	0	775	74.915	22.908	0.778	161.17	12511	1.648	0.607	0.885	1.14934
216	CEP83_KAN699-12_5.tif:0002-0234	2.035	125.785	0	922	29.882	26.492	0.812	256.022	19874	1.217	0.822	0.883	1.82576
217	CEP83_KAN699-12_5.tif:0003-0248	2.216	75.308	0	321	107.092	28	0.766	166.864	12953	1.276	0.784	0.864	1.18995
218	CEP83_KAN699-12_5.tif:0004-0391	1.778	128.246	0	796	85.854	44.332	0.884	227.99	17698	1.318	0.759	0.905	1.62585
219	CEP83_KAN699-12_5.tif:0005-0398	1.61	50.576	0	315	137.819	45.142	0.925	81.442	6322	1.17	0.855	0.933	0.580781
220	CEP83_KAN699-12_5.tif:0006-0402	1.417	76.109	0	357	46.044	45.653	0.899	107.85	8372	1.159	0.863	0.913	0.769107
221	CEP83_KAN699-12_5.tif:0007-0546	1.301	30.505	0	240	12.536	61.982	0.941	39.69	3081	1.108	0.903	0.962	0.283041
222	CEP83_KAN699-12_5.tif:0008-0671	1.958	76.48	0	592	126.523	76.221	0.808	149.756	11625	1.368	0.731	0.894	1.06795
223	CEP83_KAN699-12_5.tif:0009-0769	2.242	121.023	0	1093	51.551	87.255	0.782	271.274	21058	1.707	0.586	0.879	1.93453
224	CEP83_KAN699-12_5.tif:0010-1052	1.353	31.476	0	152	100.421	119.427	0.924	42.576	3305	1.189	0.841	0.921	0.303619
225	CEP83_KAN699-12_6.tif:0001-0110	1.443	127.196	0	726	125.513	12.578	0.955	183.521	14246	1.196	0.836	0.949	1.30873
226	CEP83_KAN699-12_6.tif:0002-0279	1.469	95.228	0	785	99.137	31.678	0.853	139.85	10856	1.277	0.783	0.908	0.997304
227	CEP83_KAN699-12_6.tif:0003-0281	1.662	91.031	0	721	71.779	31.942	0.954	151.276	11743	1.106	0.904	0.938	1.07879
228	CEP83_KAN699-12_6.tif:0004-0349	1.494	89.009	0	447	28.672	39.587	0.905	133.009	10325	1.326	0.754	0.955	0.948522
229	CEP83_KAN699-12_6.tif:0005-0401	1.971	124.967	0	1150	48.357	45.574	0.794	246.309	19120	1.868	0.535	0.916	1.75649
230	CEP83_KAN699-12_6.tif:0006-0415	1.649	94.656	0	999	125.84	47.156	0.787	156.081	12116	1.608	0.622	0.868	1.11306
231	CEP83_KAN699-12_6.tif:0007-0566	1.649	109.148	0	897	18.835	64.214	0.808	179.978	13971	1.49	0.671	0.877	1.28347
232	CEP83_KAN699-12_6.tif:0008-0739	1.958	119.118	0	590	102.452	83.848	0.892	233.246	18106	1.028	0.973	0.897	1.66334
233	CEP83_KAN699-12_6.tif:0009-0791	1.378	72.794	0	413	93.561	89.747	0.941	100.34	7789	1.207	0.828	0.93	0.715549
234	CEP83_KAN699-12_6.tif:0010-0830	1.688	77.053	0	550	2.704	94.2	0.805	130.033	10094	1.478	0.676	0.885	0.927301
235	CEP83_KAN699-12_6.tif:0011-0866	1.7	34.417	0	434	64.899	98.399	0.824	58.524	4543	1.575	0.635	0.889	0.41735
236	CEP83_KAN699-12_6.tif:0012-0903	1.481	62.357	0	227	80.2	102.499	0.952	92.379	7171	1.191	0.84	0.954	0.658775
237	CEP83_KAN699-12_6.tif:0013-1029	1.507	41.726	0	291	46.388	116.764	0.901	62.891	4882	1.22	0.82	0.925	0.448493
										10327.3				0.948736
238	CEP83_KAN699-13_1.tif:0001-0043	1.43	117.369	0	502	105.492	4.968	0.907	167.83	13028	1.197	0.835	0.914	1.19684
239	CEP83_KAN699-13_1.tif:0002-0056	1.34	95.721	0	339	140.313	6.382	0.974	128.243	9955	1.37	0.73	0.937	0.914532
240	CEP83_KAN699-13_1.tif:0003-0188	1.688	127.809	0	597	47.628	21.429	0.797	215.688	16743	1.64	0.61	0.885	1.53812
241	CEP83_KAN699-13_1.tif:0004-0260	1.404	54.459	0	178	122.572	29.523	0.865	76.469	5936	1.612	0.621	0.928	0.54532
242	CEP83_KAN699-13_1.tif:0005-0275	1.533	169.538	0	581	114.917	31.224	0.973	259.899	20175	1.053	0.95	0.941	1.85341
243	CEP83_KAN699-13_1.tif:0006-0318	1.713	100.91	0	415	49.789	36.075	0.769	172.893	13421	2.073	0.482	0.896	1.23294
244	CEP83_KAN699-13_1.tif:0007-0477	1.623	60.738	0	191	98.62	54.262	0.871	98.588	7653	1.307	0.765	0.897	0.703055
245	CEP83_KAN699-13_1.tif:0008-0680	1.366	148.557	0	637	28.592	77.208	0.962	202.857	15747	1.153	0.868	0.93	1.44662
246	CEP83_KAN699-13_1.tif:0009-0948	1.481	167.696	0	942	99.237	107.601	0.901	248.434	19285	1.222	0.818	0.902	1.77165
247	CEP83_KAN699-13_1.tif:0010-1054	1.778	19.703	0	110	93.911	119.666	0.884	35.027	2719	1.139	0.878	0.899	0.249785
248	CEP83_KAN699-13_1.tif:0011-1056	1.327	95.67	0	452	48.188	119.898	0.935	126.942	9854	1.19	0.84	0.92	0.905253
249	CEP83_KAN699-13_2.tif:0001-0025	1.945	161.371	0	1493	59.193	2.83	0.717	313.902	24367	2.139	0.468	0.853	2.23851
250	CEP83_KAN699-13_2.tif:0002-0111	1.533	96.866	0	826	56.412	12.553	0.88	148.494	11527	1.098	0.91	0.915	1.05895
251	CEP83_KAN699-13_2.tif:0003-0113	1.327	102.01	0	265	129.133	12.859	0.693	135.354	10507	2.111	0.474	0.855	0.965242
252	CEP83_KAN699-13_2.tif:0004-0168	1.585	42.35	0	345	13.61	19.053	0.828	67.104	5209	1.766	0.566	0.914	0.478533
253	CEP83_KAN699-13_2.tif:0005-0189	1.559	162.124	0	584	100.171	21.527	0.772	252.711	19617	1.631	0.613	0.89	1.80215
254	CEP83_KAN699-13_2.tif:0006-0439	1.481	116.27	0	543	22.209	49.775	0.814	172.249	13371	1.401	0.714	0.906	1.22835
255	CEP83_KAN699-13_2.tif:0007-0484	1.61	158.088	0	872	112.399	54.991	0.91	254.566	19761	1.659	0.603	0.969	1.81538
256	CEP83_KAN699-13_2.tif:0008-0643	1.597	192.161	0	1116	8.141	72.97	0.834	306.958	23828	1.61	0.621	0.908	2.189
257	CEP83_KAN699-13_2.tif:0009-0697	1.572	129.361	0	1085	114.052	79.15	0.956	203.308	15782	1.141	0.876	0.924	1.44984
258	CEP83_KAN699-13_2.tif:0010-0726	1.688	139.473	0	999	24.277	82.361	0.858	235.372	18271	1.654	0.605	0.932	1.67849
259	CEP83_KAN699-13_2.tif:0011-0754	1.623	179	0	1449	80.013	85.58	0.906	290.546	22554	1.35	0.741	0.926	2.07196
260	CEP83_KAN699-13_2.tif:0012-0971	1.572	115.508	0	727	126.909	110.148	0.903	181.537	14092	1.399	0.715	0.942	1.29458
261	CEP83_KAN699-13_2.tif:0013-1051	1.572	120.148	0	940	67.702	119.275	0.75	188.828	14658	2.05	0.488	0.868	1.34658
262	CEP83_KAN699-13_2.tif:0014-1089	1.713	132.767	0	939	90.959	123.666	0.826	227.475	17658	1.926	0.519	0.957	1.62218
263	CEP83_KAN699-13_2.tif:0015-1171	1.881	27.068	0	131	15.293	132.892	0.946	50.911	3952	1.315	0.76	0.939	0.363057
264	CEP83_KAN699-13_2.tif:0016-1201	1.958	16.053	0	78	135.467	136.378	0.924	31.433	2440	1.272	0.786	0.933	0.224154
265	CEP83_KAN699-13_3.tif:0001-0110	1.366	142.321	0	714	132.385	12.494	0.904	194.342	15086	1.316	0.76	0.93	1.3859
266	CEP83_KAN699-13_3.tif:0002-0155	1.559	146.116	0	812	105.491	17.643	0.895	227.758	17680	1.372	0.729	0.913	1.6242
267	CEP83_KAN699-13_3.tif:0003-0163	1.494	178.681	0	1039	17.762	18.578	0.948	267.01	20727	1.25	0.8	0.924	1.90412
268	CEP83_KAN699-13_3.tif:0004-0243	2.01	27.083	0	124	80.685	27.589	0.892	54.428	4225	1.314	0.761	0.918	0.388136
269	CEP83_KAN699-13_3.tif:0005-0249	2.1	82.423	0	356	35.707	28.169	0.818	173.073	13435	1.417	0.705	0.891	1.23423
270	CEP83_KAN699-13_3.tif:0006-0249	1.7	22.394	0	179	102.476	28.27	0.892	38.08	2956	1.036	0.965	0.88	0.271558
271	CEP83_KAN699-13_3.tif:0007-0315	1.353	45.248	0	581	129.581	35.784	0.971	61.204	4751	1.091	0.917	0.913	0.436458
272	CEP83_KAN699-13_3.tif:0008-0408	1.443	75.491	0	254	82.976	46.344	0.973	108.919	8455	1.122	0.891	0.922	0.776732
273	CEP83_KAN699-13_3.tif:0009-0524	1.43	47.099	0	227	142.188	59.48	0.907	67.348	5228	1.429	0.7	0.929	0.480278
274	CEP83_KAN699-13_3.tif:0010-0581	1.288	159.5	0	969	92.07	66.018	0.949	205.472	15950	1.051	0.952	0.926	1.46527
275	CEP83_KAN699-13_3.tif:0011-0603	1.469	97.816	0	628	112.231	68.406	0.96	143.65	11151	1.097	0.912	0.931	1.0244
276	CEP83_KAN699-13_3.tif:0012-0613	1.469	145.57	0	725	23.89	69.605	0.904	213.781	16595	1.266	0.79	0.908	1.52453
277	CEP83_KAN699-13_3.tif:0013-0703	1.456	111.965	0	569	39.411	79.776	0.935	162.986	12652	1.091	0.917	0.938	1.1623
278	CEP83_KAN699-13_3.tif:0014-0729	1.494	109.991	0	590	93.496	82.804	0.96	164.365	12759	1.09	0.918	0.955	1.17213
279	CEP83_KAN699-13_3.tif:0015-0818	2.744	11.948	0	100	77.764	93.005	0.874	32.785	2545	1.096	0.912	0.903	0.2338
280	CEP83_KAN699-13_3.tif:0016-0917	2.628	13.5	0	111	141.573	104.122	0.764	35.478	2754	1.229	0.814	0.845	0.253001
281	CEP83_KAN699-13_3.tif:0017-0929	1.378	131.673	0	697	16.954	105.437	0.913	181.498	14089	1.284	0.779	0.918	1.29431
282	CEP83_KAN699-13_3.tif:0018-1080	1.314	99.304	0	620	62.214	122.598	0.968	130.484	10129	1.203	0.831	0.944	0.930517
283	CEP83_KAN699-13_3.tif:0019-1114	1.649	107.719	0	855	49.836	126.492	0.921	177.62	13788	1.105	0.905	0.924	1.26666
284	CEP83_KAN699-13_4.tif:0001-0009	1.314	125.206	0	858	24.165	1.059	0.926	164.519	12771	1.071	0.934	0.907	1.17323
285	CEP83_KAN699-13_4.tif:0002-0157	1.507	69.59	0	525	110.542	17.633	0.719	104.887	8142	1.476	0.678	0.842	0.747978
286	CEP83_KAN699-13_4.tif:0003-0230	1.494	155.698	0	1234	88.526	26.076	0.905	232.666	18061	1.122	0.891	0.959	1.6592
287	CEP83_KAN699-13_4.tif:0004-0237	1.688	92.008	0	823	74.37	26.927	0.942	155.27	12053	1.098	0.911	0.939	1.10727
288	CEP83_KAN699-13_4.tif:0005-0294	1.327	18.709	0	74	52.22	33.373	0.894	24.824	1927	1.279	0.782	0.888	0.177027
289	CEP83_KAN699-13_4.tif:0006-0345	1.713	98.759	0	701	119.43	39.224	0.946	169.208	13135	1.101	0.909	0.917	1.20667
290	CEP83_KAN699-13_4.tif:0007-0404	1.7	172.174	0	1219	78.085	45.946	0.898	292.775	22727	1.353	0.739	0.936	2.08785
291	CEP83_KAN699-13_4.tif:0008-0405	1.301	134.515	0	836	2.028	46.032	0.929	175.018	13586	1.239	0.807	0.944	1.2481
292	CEP83_KAN699-13_4.tif:0009-0493	1.894	144.687	0	1058	107.097	56.029	0.952	273.993	21269	1.144	0.874	0.93	1.95391
293	CEP83_KAN699-13_4.tif:0010-0510	1.494	113.828	0	848	54.41	57.875	0.92	170.097	13204	1.212	0.825	0.928	1.21301
294	CEP83_KAN699-13_4.tif:0011-0600	1.417	128.273	0	689	5.792	68.16	0.91	181.769	14110	1.261	0.793	0.936	1.29624
295	CEP83_KAN699-13_4.tif:0012-0673	2.808	30.032	0	139	122.631	76.414	0.868	84.34	6547	1.225	0.816	0.892	0.60145
296	CEP83_KAN699-13_4.tif:0013-0685	1.842	146.07	0	763	70.331	77.754	0.818	269.084	20888	1.503	0.665	0.877	1.91891
297	CEP83_KAN699-13_4.tif:0014-0689	1.327	123.272	0	405	112.151	78.187	0.947	163.566	12697	1.196	0.836	0.941	1.16643
298	CEP83_KAN699-13_4.tif:0015-0769	2.048	131.119	0	780	90.544	87.245	0.837	268.569	20848	1.618	0.618	0.896	1.91523
299	CEP83_KAN699-13_4.tif:0016-0810	1.726	130.918	0	847	72.549	92.021	0.902	225.993	17543	1.514	0.66	0.934	1.61162
300	CEP83_KAN699-13_4.tif:0017-0911	1.649	78.992	0	484	140.877	103.387	0.852	130.252	10111	1.346	0.743	0.88	0.928863
301	CEP83_KAN699-13_4.tif:0018-1100	1.52	109.136	0	694	45.946	124.813	0.925	165.898	12878	1.12	0.893	0.915	1.18306
302	CEP83_KAN699-13_4.tif:0019-1112	1.443	95.929	0	654	80.078	126.25	0.943	138.407	10744	1.059	0.944	0.922	0.987015
303	CEP83_KAN699-13_4.tif:0020-1138	1.7	73.735	0	579	114.354	129.184	0.803	125.383	9733	1.514	0.661	0.866	0.894137
304	CEP83_KAN699-13_5.tif:0001-0026	1.378	217.477	0	1045	58.335	3.015	0.913	299.77	23270	1.098	0.911	0.926	2.13774
305	CEP83_KAN699-13_5.tif:0002-0034	1.353	171.581	0	1188	113.801	3.871	0.953	232.087	18016	1.339	0.747	0.925	1.65507
306	CEP83_KAN699-13_5.tif:0003-0088	1.43	82.081	0	413	78.655	10.001	0.907	117.37	9111	1.334	0.75	0.914	0.836996
307	CEP83_KAN699-13_5.tif:0004-0098	1.855	130.75	0	814	31.913	11.105	0.885	242.547	18828	1.352	0.74	0.932	1.72966
308	CEP83_KAN699-13_5.tif:0005-0215	1.378	102.196	0	349	29.016	24.432	0.958	140.867	10935	1.33	0.752	0.922	1.00456
309	CEP83_KAN699-13_5.tif:0006-0240	1.572	39.049	0	193	118.968	27.241	0.821	61.371	4764	1.721	0.581	0.904	0.437652
310	CEP83_KAN699-13_5.tif:0007-0243	1.301	126.356	0	432	82.587	27.622	0.959	164.403	12762	1.353	0.739	0.944	1.1724
311	CEP83_KAN699-13_5.tif:0008-0250	1.391	54.222	0	172	108.635	28.378	0.921	75.438	5856	1.248	0.801	0.931	0.537971
312	CEP83_KAN699-13_5.tif:0009-0258	1.417	56.773	0	207	136.928	29.312	0.915	80.45	6245	1.408	0.71	0.913	0.573707
313	CEP83_KAN699-13_5.tif:0010-0348	1.829	111.965	0	360	86.246	39.529	0.886	204.815	15899	1.523	0.657	0.919	1.46059
314	CEP83_KAN699-13_5.tif:0011-0384	1.765	143.642	0	494	57.086	43.56	0.897	253.51	19679	1.249	0.801	0.926	1.80784
315	CEP83_KAN699-13_5.tif:0012-0655	1.559	184.942	0	849	134.373	74.31	0.87	288.279	22378	1.501	0.666	0.927	2.05579
316	CEP83_KAN699-13_5.tif:0013-0708	1.494	113.026	0	578	66.929	80.467	0.858	168.899	13111	1.463	0.683	0.924	1.20446
317	CEP83_KAN699-13_5.tif:0014-0937	1.688	134.191	0	833	62.666	106.41	0.818	226.457	17579	1.406	0.711	0.873	1.61492
318	CEP83_KAN699-13_5.tif:0015-1070	1.288	162.25	0	869	112.57	121.433	0.981	209.015	16225	1.293	0.774	0.939	1.49054
319	CEP83_KAN699-13_5.tif:0016-1106	2.319	21.522	0	120	32.805	125.52	0.895	49.906	3874	1.456	0.687	0.918	0.355891
320	CEP83_KAN699-13_6.tif:0001-0025	3.002	21.691	0	143	52.227	2.878	0.865	65.107	5054	1.125	0.889	0.889	0.464294
321	CEP83_KAN699-13_6.tif:0002-0220	2.048	28.132	0	133	108.413	25.047	0.933	57.622	4473	1.254	0.797	0.933	0.410919
322	CEP83_KAN699-13_6.tif:0003-0247	1.726	160.687	0	1207	77.585	28.082	0.845	277.381	21532	1.562	0.64	0.921	1.97807
323	CEP83_KAN699-13_6.tif:0004-0268	1.391	96.472	0	419	113.637	30.499	0.98	134.22	10419	1.122	0.891	0.935	0.957158
324	CEP83_KAN699-13_6.tif:0005-0288	1.494	80.069	0	281	132.219	32.746	0.936	119.65	9288	1.446	0.692	0.921	0.853257
325	CEP83_KAN699-13_6.tif:0006-0309	1.391	187.63	0	697	58.35	35.073	0.883	261.046	20264	1.436	0.697	0.915	1.86158
326	CEP83_KAN699-13_6.tif:0007-0377	1.494	83.353	0	328	92.623	42.667	0.848	124.558	9669	1.185	0.844	0.882	0.888258
327	CEP83_KAN699-13_6.tif:0008-0451	1.366	103.802	0	697	1.115	51.213	0.932	141.743	11003	1.227	0.815	0.918	1.01081
328	CEP83_KAN699-13_6.tif:0009-0502	1.533	156.807	0	1230	69.08	56.994	0.961	240.383	18660	1.289	0.776	0.926	1.71423
329	CEP83_KAN699-13_6.tif:0010-0558	1.739	142.822	0	1057	112.845	63.391	0.934	248.383	19281	1.024	0.977	0.928	1.77128
330	CEP83_KAN699-13_6.tif:0011-0665	1.43	135.586	0	749	143.545	75.504	0.907	193.878	15050	1.228	0.814	0.914	1.38259
331	CEP83_KAN699-13_6.tif:0012-0700	1.52	182.78	0	1002	75.344	79.468	0.925	277.844	21568	1.303	0.768	0.918	1.98138
332	CEP83_KAN699-13_6.tif:0013-0863	1.378	112.991	0	791	109.978	97.947	0.859	155.746	12090	1.612	0.62	0.947	1.11067
333	CEP83_KAN699-13_6.tif:0014-0920	1.765	108.788	0	585	97.04	104.457	0.937	191.997	14904	1.34	0.746	0.916	1.36918
334	CEP83_KAN699-13_6.tif:0015-0973	1.404	29.853	0	142	137.3	110.461	0.891	41.919	3254	1.272	0.786	0.893	0.298934
335	CEP83_KAN699-13_6.tif:0016-1024	1.572	175.828	0	1254	83.917	116.283	0.903	276.337	21451	1.483	0.675	0.931	1.97063
										13127.9				1.20601
336	CEP83_KAN699-14_1.tif:0001-0058	1.366	116.972	0	522	123.572	6.592	0.932	159.727	12399	1.16	0.862	0.918	1.13905
337	CEP83_KAN699-14_1.tif:0002-0159	1.662	70.209	0	527	59.512	17.987	0.805	116.675	9057	1.279	0.782	0.854	0.832036
338	CEP83_KAN699-14_1.tif:0003-0222	2.087	68.451	0	465	37.683	25.15	0.816	142.851	11089	1.117	0.895	0.869	1.01871
339	CEP83_KAN699-14_1.tif:0004-0244	1.456	118.504	0	1035	67.412	27.827	0.886	172.506	13391	1.064	0.94	0.89	1.23019
340	CEP83_KAN699-14_1.tif:0005-0312	1.34	116.75	0	651	129.999	35.415	0.887	156.416	12142	1.33	0.752	0.912	1.11544
341	CEP83_KAN699-14_1.tif:0006-0402	1.456	18.681	0	90	144.491	45.643	0.896	27.194	2111	1.335	0.749	0.915	0.19393
342	CEP83_KAN699-14_1.tif:0007-0526	1.366	76.755	0	417	130.907	59.716	0.962	104.81	8136	1.277	0.783	0.934	0.747426
343	CEP83_KAN699-14_1.tif:0008-0626	1.907	131.209	0	900	102.315	71.089	0.847	250.16	19419	1.239	0.807	0.881	1.78396
344	CEP83_KAN699-14_1.tif:0009-0668	1.481	87.591	0	722	143.386	75.826	0.969	129.763	10073	1.107	0.903	0.935	0.925372
345	CEP83_KAN699-14_1.tif:0010-0895	1.391	128.528	0	715	60.656	101.601	0.883	178.819	13881	1.412	0.708	0.911	1.2752
346	CEP83_KAN699-14_1.tif:0011-0920	1.649	94.469	0	1036	133.495	104.399	0.91	155.772	12092	1.28	0.781	0.914	1.11085
347	CEP83_KAN699-14_1.tif:0012-0960	1.378	159.028	0	1005	110.194	109.031	0.885	219.204	17016	1.052	0.95	0.911	1.5632
348	CEP83_KAN699-14_1.tif:0013-1092	1.842	16.301	0	125	12.75	123.929	0.874	30.029	2331	1.084	0.922	0.859	0.214141
349	CEP83_KAN699-14_1.tif:0014-1122	1.61	102.784	0	421	133.407	127.394	0.914	165.511	12848	1.196	0.836	0.899	1.1803
350	CEP83_KAN699-14_2.tif:0001-0074	1.417	69.436	0	288	99.778	8.355	0.926	98.395	7638	1.263	0.792	0.921	0.701677
351	CEP83_KAN699-14_2.tif:0002-0111	1.417	100.664	0	401	19.381	12.557	0.985	142.645	11073	1.1	0.909	0.921	1.01724
352	CEP83_KAN699-14_2.tif:0003-0197	1.43	88.045	0	577	105.186	22.376	0.935	125.898	9773	1.281	0.781	0.917	0.897812
353	CEP83_KAN699-14_2.tif:0004-0208	1.353	24.257	0	146	134.953	23.613	0.858	32.811	2547	1.445	0.692	0.894	0.233984
354	CEP83_KAN699-14_2.tif:0005-0261	1.469	148.535	0	751	47.711	29.542	0.785	218.135	16933	1.47	0.68	0.898	1.55558
355	CEP83_KAN699-14_2.tif:0006-0283	1.585	133.374	0	750	97.508	32.21	0.936	211.333	16405	1.064	0.94	0.928	1.50707
356	CEP83_KAN699-14_2.tif:0007-0363	1.417	46.027	0	163	19.821	41.221	0.873	65.223	5063	1.564	0.639	0.921	0.46512
357	CEP83_KAN699-14_2.tif:0008-0530	1.301	6.931	0	62	75.325	60.221	0.877	9.018	700	1.386	0.721	0.882	0.0643066
358	CEP83_KAN699-14_2.tif:0009-0547	2.332	25.193	0	122	4.626	62.085	0.742	58.743	4560	1.062	0.942	0.823	0.418912
359	CEP83_KAN699-14_2.tif:0010-0572	1.649	143.664	0	889	86.744	64.978	0.875	236.892	18389	1.105	0.905	0.901	1.68933
360	CEP83_KAN699-14_2.tif:0011-0627	1.366	115.047	0	699	65.71	71.152	0.841	157.099	12195	1.525	0.656	0.891	1.12031
361	CEP83_KAN699-14_2.tif:0012-0733	1.288	56.48	0	279	136.503	83.191	0.967	72.759	5648	1.104	0.905	0.922	0.518862
362	CEP83_KAN699-14_2.tif:0013-0745	1.572	52.082	0	441	106.034	84.571	0.857	81.854	6354	1.247	0.802	0.884	0.58372
363	CEP83_KAN699-14_2.tif:0014-0899	1.469	54.798	0	246	121.803	102.134	0.878	80.475	6247	1.712	0.584	0.95	0.573891
364	CEP83_KAN699-14_2.tif:0015-1003	1.366	105.396	0	747	137.941	113.803	0.904	143.921	11172	1.393	0.718	0.93	1.02633
365	CEP83_KAN699-14_2.tif:0016-1013	1.288	148.99	0	855	102.874	115.059	0.949	191.933	14899	1.073	0.932	0.926	1.36872
366	CEP83_KAN699-14_2.tif:0017-1101	1.881	88.87	0	857	91.265	124.895	0.823	167.147	12975	1.493	0.67	0.91	1.19197
367	CEP83_KAN699-14_2.tif:0018-1198	2.138	18.373	0	96	135.643	135.897	0.833	39.291	3050	1.316	0.76	0.917	0.280193
368	CEP83_KAN699-14_3.tif:0001-0231	1.366	79.057	0	474	143.01	26.327	0.932	107.953	8380	1.312	0.762	0.93	0.769842
369	CEP83_KAN699-14_3.tif:0002-0237	1.804	169.057	0	1299	63.868	26.912	0.883	304.897	23668	1.5	0.667	0.924	2.1743
370	CEP83_KAN699-14_3.tif:0003-0369	1.353	117.914	0	645	13.279	41.864	0.924	159.495	12381	1.136	0.88	0.925	1.1374
371	CEP83_KAN699-14_3.tif:0004-0372	1.288	111.75	0	584	109.996	42.237	0.88	143.959	11175	1.419	0.705	0.917	1.02661
372	CEP83_KAN699-14_3.tif:0005-0391	1.288	130.05	0	709	41.696	44.43	0.907	167.534	13005	1.128	0.887	0.909	1.19472
373	CEP83_KAN699-14_3.tif:0006-0517	1.391	160.815	0	1101	81.589	58.744	0.938	223.739	17368	1.25	0.8	0.919	1.59554
374	CEP83_KAN699-14_3.tif:0007-0662	1.456	29.637	0	116	95.143	75.209	0.952	43.143	3349	1.194	0.837	0.919	0.307661
375	CEP83_KAN699-14_3.tif:0008-0737	1.597	99.371	0	686	108.632	83.847	0.682	158.735	12322	1.762	0.567	0.852	1.13198
376	CEP83_KAN699-14_3.tif:0009-0816	1.765	117.175	0	712	8.58	92.656	0.764	206.799	16053	1.663	0.601	0.867	1.47473
377	CEP83_KAN699-14_3.tif:0010-1001	1.391	106.176	0	540	126.654	113.637	0.857	147.721	11467	1.492	0.67	0.911	1.05343
378	CEP83_KAN699-14_4.tif:0001-0199	2.203	102.643	0	865	22.668	22.486	0.759	226.109	17552	2.009	0.498	0.919	1.61244
379	CEP83_KAN699-14_4.tif:0002-0264	1.301	40.03	0	104	94.17	29.962	0.917	52.083	4043	1.275	0.784	0.898	0.371417
380	CEP83_KAN699-14_4.tif:0003-0342	1.881	101.979	0	689	61.242	38.794	0.844	191.804	14889	1.824	0.548	0.93	1.3678
381	CEP83_KAN699-14_4.tif:0004-0391	1.533	98.193	0	487	31.462	44.424	0.944	150.529	11685	1.398	0.715	0.948	1.07346
382	CEP83_KAN699-14_4.tif:0005-0442	1.417	95.282	0	555	48.102	50.209	0.91	135.019	10481	1.392	0.718	0.944	0.962854
383	CEP83_KAN699-14_4.tif:0006-0578	1.739	106.674	0	476	87.796	65.682	0.923	185.517	14401	1.242	0.805	0.928	1.32297
384	CEP83_KAN699-14_4.tif:0007-0624	1.327	157.981	0	824	64.635	70.874	0.918	209.62	16272	1.523	0.657	0.954	1.49485
385	CEP83_KAN699-14_4.tif:0008-0697	1.366	99.736	0	459	16.38	79.072	0.893	136.191	10572	1.482	0.675	0.914	0.971213
386	CEP83_KAN699-14_4.tif:0009-0738	2.654	33.951	0	177	24.615	83.754	0.75	90.098	6994	1.447	0.691	0.848	0.642515
387	CEP83_KAN699-14_4.tif:0010-0907	1.623	98.762	0	401	115.861	103.046	0.862	160.307	12444	1.539	0.65	0.9	1.14319
388	CEP83_KAN699-14_4.tif:0011-0958	1.494	121.336	0	832	74.786	108.704	0.936	181.318	14075	1.092	0.916	0.917	1.29302
389	CEP83_KAN699-14_4.tif:0012-0979	1.366	7.953	0	46	61.41	111.107	0.944	10.86	843	1.208	0.828	0.942	0.0774435
390	CEP83_KAN699-14_4.tif:0013-1007	1.288	77.43	0	369	105.799	114.341	0.962	99.747	7743	1.126	0.888	0.966	0.711323
391	CEP83_KAN699-14_4.tif:0014-1206	1.314	79.206	0	450	83.048	136.864	0.987	104.076	8079	1.261	0.793	0.932	0.74219
392	CEP83_KAN699-14_4.tif:0015-1221	1.378	6.131	0	28	87.182	138.583	0.913	8.451	656	1.237	0.809	0.922	0.0602645
393	CEP83_KAN699-14_4.tif:0016-1223	2.267	13.602	0	70	108.259	138.832	0.839	30.84	2394	1.104	0.906	0.873	0.219929
394	CEP83_KAN699-14_5.tif:0001-0102	1.778	145.21	0	772	100.625	11.584	0.827	258.147	20039	1.378	0.726	0.896	1.84091
395	CEP83_KAN699-14_5.tif:0002-0327	1.585	121.268	0	776	45.303	37.129	0.936	192.152	14916	1.302	0.768	0.921	1.37028
396	CEP83_KAN699-14_5.tif:0003-0390	1.597	125.532	0	771	63.092	44.306	0.917	200.525	15566	1.332	0.751	0.929	1.43
397	CEP83_KAN699-14_5.tif:0004-0534	1.765	113.942	0	715	100.279	60.596	0.888	201.092	15610	1.492	0.67	0.923	1.43404
398	CEP83_KAN699-14_5.tif:0005-0657	1.327	30.388	0	136	14.266	74.584	0.878	40.321	3130	1.586	0.63	0.932	0.287542
399	CEP83_KAN699-14_5.tif:0006-0740	1.662	107.767	0	633	71.539	83.999	0.845	179.089	13902	1.36	0.735	0.896	1.27713
400	CEP83_KAN699-14_5.tif:0007-0840	1.469	72.711	0	338	92.926	95.307	0.878	106.781	8289	1.3	0.769	0.927	0.761482
401	CEP83_KAN699-14_5.tif:0008-0883	1.494	70.509	0	235	120.831	100.383	0.858	105.364	8179	1.387	0.721	0.924	0.751377
402	CEP83_KAN699-14_5.tif:0009-0887	1.984	11.922	0	118	110.694	100.69	0.937	23.652	1836	1.132	0.883	0.928	0.168667
403	CEP83_KAN699-14_5.tif:0010-1035	1.34	50.952	0	335	70.626	117.523	0.861	68.263	5299	1.432	0.698	0.916	0.486801
404	CEP83_KAN699-14_5.tif:0011-1051	1.456	187.301	0	1139	92.535	119.339	0.952	272.653	21165	1.237	0.808	0.93	1.94436
405	CEP83_KAN699-14_6.tif:0001-0221	1.404	149.505	0	784	142.359	25.113	0.891	209.929	16296	1.229	0.814	0.912	1.49706
406	CEP83_KAN699-14_6.tif:0002-0228	1.404	116	0	740	101.392	25.955	0.942	162.883	12644	1.031	0.97	0.956	1.16156
407	CEP83_KAN699-14_6.tif:0003-0231	1.378	104.327	0	576	9.163	26.305	0.885	143.805	11163	1.306	0.765	0.926	1.02551
408	CEP83_KAN699-14_6.tif:0004-0244	2.461	20.696	0	112	42.39	27.792	0.89	50.924	3953	1.251	0.799	0.907	0.363149
409	CEP83_KAN699-14_6.tif:0005-0572	1.34	94.875	0	646	30.086	64.895	0.887	127.109	9867	1.328	0.753	0.924	0.906448
410	CEP83_KAN699-14_6.tif:0006-0624	1.366	66.745	0	261	81.102	70.864	0.932	91.142	7075	1.117	0.895	0.93	0.649956
411	CEP83_KAN699-14_6.tif:0007-0635	1.34	100.702	0	580	4.083	72.122	0.861	134.916	10473	1.594	0.627	0.916	0.962119
412	CEP83_KAN699-14_6.tif:0008-0820	1.391	128.556	0	1018	100.329	93.073	0.98	178.857	13884	1.298	0.77	0.947	1.27548
413	CEP83_KAN699-14_6.tif:0009-1051	1.353	98.162	0	388	56.395	119.28	0.884	132.777	10307	1.484	0.674	0.897	0.946869
414	CEP83_KAN699-14_6.tif:0010-1112	1.494	104.103	0	503	79.707	126.183	0.905	155.566	12076	1.336	0.748	0.955	1.10938
415	CEP83_KAN699-14_6.tif:0011-1216	1.61	21.344	0	110	128.229	137.965	0.903	34.37	2668	1.19	0.84	0.883	0.2451
416	CEP83_KAN699-14_6.tif:0012-1271	2.035	9.81	0	48	85.932	144.244	0.904	19.967	1550	1.144	0.874	0.913	0.142393
										10417.1				0.956982

## Sheet: IF detail
Exp. number	Cell line	Gene induced	Culture condition, fixation condition	rabbit-Alexa488	mouse IgG1-Alexa568	mouse IgG2b-Alexa647	Nuclear stain	Date	Replicate
KAN699-1	RPE-BFP-Cas9 sgSafe (pool)		Confluent, fixed in 100% methanol for 5 minutes at -20C.	CCDC41, SIGMA, HPA038161, 1:500	CEP170, Invitrogen, 41-3200, 1:1000	FGFR1OP, Abnova, H00011116-M01, 1:1000	DAPI	2021-09-30
KAN699-2	RPE-BFP-Cas9 CEP164KO (pool)		Confluent, fixed in 100% methanol for 5 minutes at -20C.	CCDC41, SIGMA, HPA038161, 1:500	CEP170, Invitrogen, 41-3200, 1:1000	FGFR1OP, Abnova, H00011116-M01, 1:1000	DAPI	2021-09-30
KAN699-3	RPE-BFP-Cas9 CEP83 KO (pool)		Confluent, fixed in 100% methanol for 5 minutes at -20C.	CCDC41, SIGMA, HPA038161, 1:500	CEP170, Invitrogen, 41-3200, 1:1000	FGFR1OP, Abnova, H00011116-M01, 1:1000	DAPI	2021-09-30
KAN699-4	RPE-BFP-Cas9 SCLT1 KO (pool)		Confluent, fixed in 100% methanol for 5 minutes at -20C.	CCDC41, SIGMA, HPA038161, 1:500	CEP170, Invitrogen, 41-3200, 1:1000	FGFR1OP, Abnova, H00011116-M01, 1:1000	DAPI	2021-09-30
KAN699-5	RPE-BFP-Cas9 FBF1 KO (pool)		Confluent, fixed in 100% methanol for 5 minutes at -20C.	CCDC41, SIGMA, HPA038161, 1:500	CEP170, Invitrogen, 41-3200, 1:1000	FGFR1OP, Abnova, H00011116-M01, 1:1000	DAPI	2021-09-30
KAN699-6	RPE-BFP-Cas9 CEP89KO (pool)		Confluent, fixed in 100% methanol for 5 minutes at -20C.	CCDC41, SIGMA, HPA038161, 1:500	CEP170, Invitrogen, 41-3200, 1:1000	FGFR1OP, Abnova, H00011116-M01, 1:1000	DAPI	2021-09-30
KAN699-7	RPE-BFP-Cas9 CCDC92 KO (pool)		Confluent, fixed in 100% methanol for 5 minutes at -20C.	CCDC41, SIGMA, HPA038161, 1:500	CEP170, Invitrogen, 41-3200, 1:1000	FGFR1OP, Abnova, H00011116-M01, 1:1000	DAPI	2021-09-30
KAN699-8	RPE-BFP-Cas9 ANKRD26 KO (pool)		Confluent, fixed in 100% methanol for 5 minutes at -20C.	CCDC41, SIGMA, HPA038161, 1:500	CEP170, Invitrogen, 41-3200, 1:1000	FGFR1OP, Abnova, H00011116-M01, 1:1000	DAPI	2021-09-30
KAN699-9	RPE-BFP-Cas9 TTBK2 KO (pool)		Confluent, fixed in 100% methanol for 5 minutes at -20C.	CCDC41, SIGMA, HPA038161, 1:500	CEP170, Invitrogen, 41-3200, 1:1000	FGFR1OP, Abnova, H00011116-M01, 1:1000	DAPI	2021-09-30
KAN699-10	RPE-BFP-Cas9 INPP5E KO (pool)		Confluent, fixed in 100% methanol for 5 minutes at -20C.	CCDC41, SIGMA, HPA038161, 1:500	CEP170, Invitrogen, 41-3200, 1:1000	FGFR1OP, Abnova, H00011116-M01, 1:1000	DAPI	2021-09-30
KAN699-11	RPE-BFP-Cas9 Kiz KO (pool)		Confluent, fixed in 100% methanol for 5 minutes at -20C.	CCDC41, SIGMA, HPA038161, 1:500	CEP170, Invitrogen, 41-3200, 1:1000	FGFR1OP, Abnova, H00011116-M01, 1:1000	DAPI	2021-09-30
KAN699-12	RPE-BFP-Cas9 LRRC45 KO (pool)		Confluent, fixed in 100% methanol for 5 minutes at -20C.	CCDC41, SIGMA, HPA038161, 1:500	CEP170, Invitrogen, 41-3200, 1:1000	FGFR1OP, Abnova, H00011116-M01, 1:1000	DAPI	2021-09-30
KAN699-13	RPE-BFP-Cas9 NCS1 KO (pool)		Confluent, fixed in 100% methanol for 5 minutes at -20C.	CCDC41, SIGMA, HPA038161, 1:500	CEP170, Invitrogen, 41-3200, 1:1000	FGFR1OP, Abnova, H00011116-M01, 1:1000	DAPI	2021-09-30
KAN699-14	RPE-BFP-Cas9 C3orf14 KO (pool)		Confluent, fixed in 100% methanol for 5 minutes at -20C.	CCDC41, SIGMA, HPA038161, 1:500	CEP170, Invitrogen, 41-3200, 1:1000	FGFR1OP, Abnova, H00011116-M01, 1:1000	DAPI	2021-09-30

## Sheet: After ROUT
sgSafe	CEP164 KO	CEP83 KO	SCLT1 KO	FBF1 KO	CEP89 KO	CCDC92 KO	ANKRD26 KO	TTBK2 KO	INPP5E KO	KIZ KO	LRRC45KO	NCS1 KO	C3orf14 KO
0.841682	1.61942	0.570491	0.338528	1.32132	1.03984	1.28209	1.02771	1.10809	0.549454	0.497274	0.162971	1.19684	1.13905
1.57046	0.873376	0.310877	0.607973	0.546239	1.55365	0.251439	1.08476	0.944113	0.399895	0.884675	1.2458	0.914532	0.832036
1.05114	1.22458	0.379685	0.408163	0.71316	1.58341	0.938141	0.518219	1.21227	0.859136	1.08651	0.810998	1.53812	1.01871
0.65308	0.857115	0.131277	0.466498	0.775813	1.0177	0.706913	1.3497	0.351573	0.925464	1.08844	1.57551	0.54532	1.23019
0.643066	1.07842	0.192552	0.238669	1.57974	1.27869	0.405132	0.619273	0.902497	0.506277	0.576647	2.03631	1.85341	1.11544
1.65011	0.756797	0.299669	0.827167	0.606319	1.45002	0.975439	0.312714	1.7756	0.408255	0.654274	1.34603	1.23294	0.19393
0.512707	1.75272	0.599246	0.387769	1.74831	0.627632	0.841682	1.11645	0.978563	1.18894	0.771036	0.310142	0.703055	0.747426
1.0956	1.48539	0.523731	0.967906	0.974429	0.127603	0.391535	0.913981	0.719132	0.785	1.52012	1.40179	1.44662	1.78396
1.43229	1.14659	0.624876	1.20207	1.11094	1.07769	0.927761	0.567368	0.64968	0.690745	1.22036	0.782428	1.77165	0.925372
0.649497	0.516474	0.370039	0.417717	1.6062	0.163247	0.654274	0.346245	1.77238	0.619089	0.744303	0.339906	0.249785	1.2752
0.794278	0.831117	0.155714	0.708751	1.30708	0.324105	0.712517	1.6525	1.07557	1.53785	1.12252	1.07511	0.905253	1.11085
1.74721	0.88982	0.284235	0.374448	0.771679	0.701401	0.84407	3.24794	0.299485	1.01568	0.714538	0.577657	2.23851	1.5632
0.470908	0.597408	0.508482	0.436734	2.3799	0.956607	0.20082	1.25885	1.4141	0.769934	0.807967	0.926199	1.05895	0.214141
0.537236	0.599338	0.287451	0.115201	1.25058	1.4763	0.673015	0.998222	1.24718	0.166738	0.867037	2.00683	0.965242	1.1803
1.20896	1.10001	0.49856	0.495436	1.02413	0.948339	1.35751	1.45544	0.842784	0.172985	0.537052	0.897996	0.478533	0.701677
0.50104	0.972867	0.418177	0.413216	2.05763	1.21558	0.886512	0.605493	1.15026	0.908652	0.541737	0.346153	1.80215	1.01724
0.222501	1.07456	0.21359	0.690377	1.80454	1.25343	0.733187	0.343397	0.259156	1.56587	0.486066	1.22578	1.22835	0.897812
1.19197	1.03139	0.336599	0.392087	0.93759	0.824686	0.836905	0.652161	0.932997	0.711231	0.767637	1.08871	1.81538	0.233984
1.47786	1.29036	0.309039	0.781417	1.44607	1.55732	0.985361	0.926199	0.987566	0.504991	1.32527	1.20501	2.189	1.55558
0.584915	1.37607	0.613209	0.670902	1.11122	1.06574	1.07567	0.960649	0.622029	0.777559	0.797953	1.47914	1.44984	1.50707
0.243906	1.07842	0.31795	0.634247	1.0854	0.876591	1.02303	0.620742	0.834516	1.24819	0.422035	1.00667	1.67849	0.46512
3.17629	1.28402	0.499662	0.560478	0.714171	0.349093	0.671177	0.516474	0.601083	0.838191	0.927944	0.4597	2.07196	0.0643066
1.42173	1.75346	0.646465	0.710129	0.964783	1.48162	1.308	0.123652	0.64325	0.0651334	0.572145	0.840855	1.29458	0.418912
0.315378	1.23662	0.81798	0.4213	1.82254	1.07631	0.873284	0.956423	0.972591	0.219561	1.02055	0.557079	1.34658	1.68933
0.40752	0.912143	0.241609	0.6856	1.91294	0.809069	1.13391	0.599429	1.66968	1.25784	1.21089	1.55098	1.62218	1.12031
1.94013	0.871171	0.486709	0.626438	1.27097	1.19482	0.731074	0.762033	0.54826	1.09496	0.473572	0.933181	0.363057	0.518862
0.692674	0.948339	0.246294	0.333292	1.55016	1.064	1.68042	1.38516	1.62659	0.872457	1.40703	0.451157	0.224154	0.58372
0.77563	1.48328	0.578576	0.973418	0.677424	0.424883	0.580872	0.279091	0.57435	0.988944	0.0958168	0.962945	1.3859	0.573891
1.38259	1.53289	0.260442	0.30564	0.300955	1.1769	0.815867	0.808058	1.34024	0.769107	0.504991	1.23184	1.6242	1.02633
0.462548	1.1758	0.658224	0.315837	1.4661	0.266781	0.199259	1.12417	0.409266	0.930792	1.08256	1.20621	1.90412	1.36872
0.472378	1.34649	0.20376	0.42672	1.11792	1.60932	1.35163	0.984993	1.2142	0.955137	1.18499	0.376102	0.388136	1.19197
0.373989	1.32665	0.41588	0.309039	1.09266	1.43808	0.837639	1.31746	0.950911	0.936488	0.952473	0.937039	1.23423	0.280193
0.113823	1.36982	0.505909	0.83323	0.390525	0.336048	1.1656	1.07061	0.795105	1.16634	0.598143	1.27548	0.271558	0.769842
0.913246	1.4153	0.376837	0.727216	0.58914	0.670902	0.771128	0.793268	0.885318	1.44552	0.59796	0.906631	0.436458	2.1743
0.493048	0.460068	0.344592	0.841773	1.30395	0.312898	0.549454	0.482851	0.535123	0.999692	0.347164	0.850776	0.776732	1.1374
1.50386	1.66343	0.738056	0.158654	0.45575	2.17274	0.398058	1.0538	1.13538	0.520975	1.54896	0.382073	0.480278	1.02661
0.621845	0.370406	0.208445	0.476328	0.830749	1.57386	1.31525	0.987106	1.57386	1.27318	0.86722	1.17304	1.46527	1.19472
0.577198	0.216897	0.341284	0.35286	1.71258	0.678986	1.01898	1.18774	1.3678	1.08917	0.861157	0.235178	1.0244	1.59554
0.986096	1.48668	0.105922	0.180977	1.16	1.08155	1.08816	0.86373	0.720418	1.39261	1.01908	0.915818	1.52453	0.307661
0.449228	1.55144	0.290115	0.598327	0.338253	0.952289	0.641321	1.20575	4.66002	1.52627	1.11131	0.351757	1.1623	1.13198
1.23166	1.28347	0.262463	0.21065	2.05441	1.25701	0.963864	0.779304	0.568195	1.01816	0.537419	0.872824	1.17213	1.47473
0.552853	1.3068	0.369763	0.330536	1.73655	1.59931	1.36229	0.298107	1.29899	0.922708	0.245927	0.896985	0.2338	1.05343
1.17268	1.03332	0.227829	1.26831	2.02933	0.615782	2.00306	1.17369	1.19822	0.393924	1.06584	1.03111	0.253001	1.61244
0.488363	1.06786	0.205046	0.557079	0.916094	1.22201	1.08733	1.19298	0.780866	0.804476	2.17366	0.394199	1.29431	0.371417
0.633512	0.327321	0.217173	0.634614	0.570859	1.72498	1.44001	1.01862	1.16524	1.08155	1.10819	0.938233	0.930517	1.3678
1.65755	0.753582	0.460895	0.423597	1.08816	1.04948	2.35555	0.480003	0.765157	0.679078	1.12362	0.970479	1.26666	1.07346
1.16882	1.22467	0.168208	1.00181	1.69466	0.742833	0.302425	0.373713	0.579954	0.584271	1.02339	1.3215	1.17323	0.962854
0.328974	0.571318	0.460343	0.941541	0.340733	0.812927	0.825054	1.3994	1.23542	0.674852	1.13657	1.4006	0.747978	1.32297
1.38774	0.467325	0.250979	0.681742	1.72011	0.73236	1.59196	0.377755	1.18113	0.621294	0.19834	0.635992	1.6592	1.49485
2.5143	0.643525	0.131553	0.830566	0.292044	1.01476	1.99654	1.04866	1.50928	0.955321	0.879806	1.12289	1.10727	0.971213
1.16753	0.227186	0.27514	1.13014	1.01954	1.09615	1.06905	0.537052	0.658316	1.14732	0.162328	0.586844	0.177027	0.642515
1.88804	1.00438	0.420198	0.436917	1.21898	1.01908	0.483402	0.44739	0.961292	1.10598	0.738607	0.684773	1.20667	1.14319
0.633971	1.56045	0.311336	0.359474	0.666125	0.837456	0.644903	2.1969	0.300496	1.23524	0.943562	1.02376	2.08785	1.29302
0.496998	1.13373	0.169218	0.770669	1.22596	1.49559	0.80668	1.07576	1.7518	0.476879	0.834975	1.00116	1.2481	0.0774435
2.04293	1.35926	0.137341	0.553772	1.67638	1.04994	0.91591	0.983432	0.609718	0.31501	1.35494	0.278907	1.95391	0.711323
1.65773	0.232331	0.205597	1.35834	1.92029	1.09027	1.52581	1.48392	1.08458	0.744854	0.922432	1.14934	1.21301	0.74219
1.81179	0.939979	1.0019	0.913338	1.16634	0.335497	1.37414	1.46647	0.995099	0.436734	0.826432	1.82576	1.29624	0.0602645
1.20979	0.790144	0.460711	0.616241	1.28053	0.301139	1.3317	0.905713	0.934559	0.74807	0.686611	1.18995	0.60145	0.219929
0.256491	1.15577	0.567184	0.167381	1.7948	1.03368	0.533102	0.757899	1.39665	0.437101	0.751928	1.62585	1.91891	1.84091
0.291676	1.28402	0.142485	0.317123	1.50174	0.28791	1.57303	1.13951	1.78111	1.31636	0.640861	0.580781	1.16643	1.37028
0.404948	1.06675		0.545044	0.240599	0.897261	1.11085	0.966069	1.88979	1.10543	0.370774	0.769107	1.91523	1.43
0.203484	1.01081		0.343857	0.965334	0.842508	1.11893	0.48478	0.713895	0.354146	0.797126	0.283041	1.61162	1.43404
1.03699	1.83761		0.358831	1.38369	0.875121	1.51249	1.24626	1.23744	0.734473	0.408163	1.06795	0.928863	0.287542
1.25012	0.376194			1.34998	0.649405	0.756797	0.506644	1.3068	0.901854	0.459425	1.93453	1.18306	1.27713
2.96793	1.42632			1.49844	0.726848	1.17525	0.83571	1.06418	0.367558	1.46775	0.303619	0.987015	0.761482
1.61566	0.947236			1.6061	0.916828	0.841314	0.972591		0.449871	0.50003	1.30873	0.894137	0.751377
1.51019	1.20308			0.902589	1.01127	1.20474	0.463099		0.996385	0.695614	0.997304	2.13774	0.168667
0.182539	0.217356			0.744027	0.66098	1.8524	0.146343			0.906815	1.07879	1.65507	0.486801
2.00618	0.863546			1.51139	0.137892	1.239	0.780498			0.731809	0.948522	0.836996	1.94436
0.458139	1.06244			0.24657	0.537879	1.90697	1.01145			1.11306	1.75649	1.72966	1.49706
0.422954	0.64178			1.32371		1.30699	1.18104			1.58516	1.11306	1.00456	1.16156
0.0950819	0.0708291			0.477431		0.398333	0.967079			0.89129	1.28347	0.437652	1.02551
1.00079	1.25086			2.07324		0.280285	0.584547			1.25389	1.66334	1.1724	0.363149
0.932446	0.224338			0.858585		1.55723	0.241334			1.05546	0.715549	0.537971	0.906448
1.17699	1.23698			0.894321		0.237291	0.580597			0.762676	0.927301	0.573707	0.649956
0.22884	0.895607			0.582985			1.4491			1.45259	0.41735	1.46059	0.962119
0.584731	1.11048			0.67329		0.469714	1.26611			0.749723	0.658775	1.80784	1.27548
0.958077	1.4378			0.52612		0.390433	0.35387			0.627816	0.448493	2.05579	0.946869
1.92451	2.10806			0.498284		0.986831	1.40244			1.11324		1.20446	1.10938
1.20584	0.931252			1.33473		0.609443	0.776089			1.47326		1.61492	0.2451
0.147078	0.677792			1.07631			0.375642			1.12904		1.49054	0.142393
1.32269	1.9586			1.15908			1.04168			1.34474		0.355891
1.05794	0.904059			0.897536			0.991424			0.729329		0.464294
1.65057	1.12638			1.05968			1.08844			0.878612		0.410919
0.774895	0.685508						0.441694			0.901119		1.97807
0.211844	1.32371						0.386299			1.64368		0.957158
1.46674	1.70008						0.470081			0.897077		0.853257
1.12546	0.380236									1.22697		1.86158
0.899374	0.788123									0.743017		0.888258
2.51081	0.877601									1.42641		1.01081
0.913154										0.147446		1.71423
										0.737964		1.77128
												1.38259
												1.98138
												1.11067
												1.36918
												0.298934
												1.97063
