# Supplementary material for: A hierarchical pathway for assembly of the distal appendages that organize primary cilia
Source: eLife. 2025 Jan 30;14:e85999. doi: 10.7554/eLife.85999 (PMC11984956; doi:10.7554/eLife.85999)
Supplement: Figure 2—source data 3. [file elife-85999-fig2-data3.xlsx]

## Sheet: Raw data
	Label	Area	Mean	Min	Max	X	Y	Circ	IntDen	RawIntDen	AR	Round	Solidity	CEP83/CEP170			Label	Area	Mean	Min	Max	X	Y	Circ	IntDen	RawIntDen	AR	Round	Solidity
578	CEP83_KAN618-1_1.tif:0001-0243	1.002	84.275	0	277	34.258	17.54	0.887	84.467	16265	1.519	0.658	0.928	0.566744		585	CEP170_KAN618-1_1.tif:0001-0243	1.002	148.699	0	470	34.258	17.54	0.887	149.038	28699	1.519	0.658	0.928
579	CEP83_KAN618-1_1.tif:0002-0463	0.566	136.312	0	416	27.366	33.364	0.942	77.16	14858	1.218	0.821	0.969	1.43237		586	CEP170_KAN618-1_1.tif:0002-0463	0.566	95.165	0	227	27.366	33.364	0.942	53.869	10373	1.218	0.821	0.969
580	CEP83_KAN618-1_1.tif:0003-0574	1.402	124.5	0	837	63.927	41.397	0.728	174.568	33615	1.486	0.673	0.85	1.46701		587	CEP170_KAN618-1_1.tif:0003-0574	1.402	84.867	0	343	63.927	41.397	0.728	118.996	22914	1.486	0.673	0.85
581	CEP83_KAN618-1_1.tif:0004-0588	0.862	104.988	0	411	26.729	42.404	0.785	90.506	17428	1.482	0.675	0.902	1.5576		588	CEP170_KAN618-1_1.tif:0004-0588	0.862	67.404	0	238	26.729	42.404	0.785	58.106	11189	1.482	0.675	0.902
582	CEP83_KAN618-1_1.tif:0005-0833	1.065	122.068	0	562	12.267	60.066	0.709	129.953	25024	1.754	0.57	0.823	2.33215		589	CEP170_KAN618-1_1.tif:0005-0833	1.065	52.341	0	252	12.267	60.066	0.709	55.722	10730	1.754	0.57	0.823
583	CEP83_KAN618-1_1.tif:0006-0903	1.075	104.111	0	558	81.505	65.098	0.835	111.918	21551	1.252	0.799	0.906	1.26236		590	CEP170_KAN618-1_1.tif:0006-0903	1.075	82.473	0	267	81.505	65.098	0.835	88.657	17072	1.252	0.799	0.906
584	CEP83_KAN618-1_1.tif:0007-0960	1.267	139.029	0	933	47.276	69.208	0.803	176.167	33923	1.144	0.874	0.9	1.59563		591	CEP170_KAN618-1_1.tif:0007-0960	1.267	87.131	0	430	47.276	69.208	0.803	110.406	21260	1.144	0.874	0.9
592	CEP83_KAN618-1_2.tif:0001-0335	0.826	155.447	0	753	40.911	24.175	0.845	128.354	24716	1.052	0.95	0.896	1.2182		597	CEP170_KAN618-1_2.tif:0001-0335	0.826	127.604	0	432	40.911	24.175	0.845	105.364	20289	1.052	0.95	0.896
593	CEP83_KAN618-1_2.tif:0002-0426	0.919	126.113	0	724	65.042	30.667	0.694	115.921	22322	1.337	0.748	0.827	2.52568		598	CEP170_KAN618-1_2.tif:0002-0426	0.919	49.932	0	195	65.042	30.667	0.694	45.897	8838	1.337	0.748	0.827
594	CEP83_KAN618-1_2.tif:0003-0562	1.21	114.897	0	727	9.796	40.531	0.819	139.026	26771	1.087	0.92	0.91	1.20433		599	CEP170_KAN618-1_2.tif:0003-0562	1.21	95.403	0	393	9.796	40.531	0.819	115.438	22229	1.087	0.92	0.91
595	CEP83_KAN618-1_2.tif:0004-0585	1.122	125.426	0	752	56.194	42.089	0.724	140.693	27092	1.313	0.761	0.859	1.63708		600	CEP170_KAN618-1_2.tif:0004-0585	1.122	76.616	0	306	56.194	42.089	0.724	85.941	16549	1.313	0.761	0.859
596	CEP83_KAN618-1_2.tif:0005-0810	0.774	58.53	0	356	12.794	58.414	0.762	45.289	8721	1.705	0.586	0.892	0.474302		601	CEP170_KAN618-1_2.tif:0005-0810	0.774	123.403	0	396	12.794	58.414	0.762	95.486	18387	1.705	0.586	0.892
602	CEP83_KAN618-1_3.tif:0001-0009	0.852	152.86	0	815	24.329	0.671	0.868	130.187	25069	1.149	0.87	0.951	2.14577		613	CEP170_KAN618-1_3.tif:0001-0009	0.852	71.238	0	306	24.329	0.671	0.868	60.672	11683	1.149	0.87	0.951
603	CEP83_KAN618-1_3.tif:0002-0012	1.184	145.43	0	1039	37.821	0.93	0.779	172.194	33158	1.658	0.603	0.889	1.28929		614	CEP170_KAN618-1_3.tif:0002-0012	1.184	112.798	0	570	37.821	0.93	0.779	133.557	25718	1.658	0.603	0.889
604	CEP83_KAN618-1_3.tif:0003-0137	1.137	101.055	0	674	51.885	9.807	0.827	114.93	22131	1.48	0.676	0.899	1.08252		615	CEP170_KAN618-1_3.tif:0003-0137	1.137	93.352	0	385	51.885	9.807	0.827	106.169	20444	1.48	0.676	0.899
605	CEP83_KAN618-1_3.tif:0004-0242	1.376	144.698	0	1137	22.465	17.412	0.815	199.131	38345	1.525	0.656	0.882	1.55136		616	CEP170_KAN618-1_3.tif:0004-0242	1.376	93.272	0	491	22.465	17.412	0.815	128.359	24717	1.525	0.656	0.882
606	CEP83_KAN618-1_3.tif:0005-0458	0.81	195.782	0	925	91.607	33.03	0.846	158.609	30542	1.249	0.801	0.937	2.41153		617	CEP170_KAN618-1_3.tif:0005-0458	0.81	81.186	0	295	91.607	33.03	0.846	65.771	12665	1.249	0.801	0.937
607	CEP83_KAN618-1_3.tif:0006-0689	1.267	100.135	0	672	56.152	49.636	0.797	126.884	24433	1.385	0.722	0.891	1.24639		618	CEP170_KAN618-1_3.tif:0006-0689	1.267	80.34	0	369	56.152	49.636	0.797	101.801	19603	1.385	0.722	0.891
608	CEP83_KAN618-1_3.tif:0007-0880	1.589	96.359	0	848	50.517	63.383	0.825	153.125	29486	1.317	0.76	0.926	0.936837		619	CEP170_KAN618-1_3.tif:0007-0880	1.589	102.856	0	506	50.517	63.383	0.825	163.449	31474	1.317	0.76	0.926
609	CEP83_KAN618-1_3.tif:0008-0934	1.319	104.488	0	709	25.928	67.391	0.814	137.826	26540	1.288	0.776	0.906	1.18145		620	CEP170_KAN618-1_3.tif:0008-0934	1.319	88.441	0	415	25.928	67.391	0.814	116.659	22464	1.288	0.776	0.906
610	CEP83_KAN618-1_3.tif:0009-1015	0.893	70.913	0	369	13.21	73.192	0.843	63.341	12197	1.513	0.661	0.903	0.982361		621	CEP170_KAN618-1_3.tif:0009-1015	0.893	72.186	0	216	13.21	73.192	0.843	64.478	12416	1.513	0.661	0.903
611	CEP83_KAN618-1_3.tif:0010-1194	0.805	60.123	0	252	86.202	86.048	0.896	48.395	9319	1.307	0.765	0.925	0.478634		622	CEP170_KAN618-1_3.tif:0010-1194	0.805	125.613	0	344	86.202	86.048	0.896	101.111	19470	1.307	0.765	0.925
612	CEP83_KAN618-1_3.tif:0011-1223	1.246	101.325	0	643	33.978	88.191	0.818	126.287	24318	1.568	0.638	0.972	1.62423		623	CEP170_KAN618-1_3.tif:0011-1223	1.246	62.383	0	249	33.978	88.191	0.818	77.752	14972	1.568	0.638	0.972
624	CEP83_KAN618-1_4.tif:0001-0026	0.919	78.972	0	401	51.833	1.9	0.759	72.59	13978	1.949	0.513	0.924	2.06653		632	CEP170_KAN618-1_4.tif:0001-0026	0.919	38.215	0	201	51.833	1.9	0.759	35.126	6764	1.949	0.513	0.924
625	CEP83_KAN618-1_4.tif:0002-0136	1.127	76.341	0	379	27.662	9.882	0.778	86.03	16566	1.125	0.889	0.895	0.748813		633	CEP170_KAN618-1_4.tif:0002-0136	1.127	101.949	0	401	27.662	9.882	0.778	114.888	22123	1.125	0.889	0.895
626	CEP83_KAN618-1_4.tif:0003-0433	0.602	34.638	0	178	47.53	31.258	0.948	20.866	4018	1.234	0.81	0.928	0.320108		634	CEP170_KAN618-1_4.tif:0003-0433	0.602	108.207	0	325	47.53	31.258	0.948	65.184	12552	1.234	0.81	0.928
627	CEP83_KAN618-1_4.tif:0004-0453	0.748	138.826	0	532	2.026	32.626	0.773	103.816	19991	1.434	0.697	0.878	2.10676		635	CEP170_KAN618-1_4.tif:0004-0453	0.748	65.896	0	194	2.026	32.626	0.773	49.278	9489	1.434	0.697	0.878
628	CEP83_KAN618-1_4.tif:0005-0559	1.07	191.102	0	1072	75.094	40.298	0.842	204.439	39367	1.63	0.613	0.918	2.572		636	CEP170_KAN618-1_4.tif:0005-0559	1.07	74.301	0	329	75.094	40.298	0.842	79.486	15306	1.63	0.613	0.918
629	CEP83_KAN618-1_4.tif:0006-0600	0.602	193.56	0	730	33.017	43.249	0.889	116.602	22453	1.223	0.817	0.987			637	CEP170_KAN618-1_4.tif:0006-0600	0.602	14.5	0	138	33.017	43.249	0.889	8.735	1682	1.223	0.817	0.987
630	CEP83_KAN618-1_4.tif:0007-1093	1.028	115.46	0	542	66.796	78.752	0.834	118.721	22861	1.502	0.666	0.912	1.6536		638	CEP170_KAN618-1_4.tif:0007-1093	1.028	69.823	0	235	66.796	78.752	0.834	71.795	13825	1.502	0.666	0.912
631	CEP83_KAN618-1_4.tif:0008-1095	1.537	99.321	0	802	36.378	78.929	0.753	152.673	29399	1.966	0.509	0.885	1.52643		639	CEP170_KAN618-1_4.tif:0008-1095	1.537	65.068	0	295	36.378	78.929	0.753	100.02	19260	1.966	0.509	0.885
640	CEP83_KAN618-1_5.tif:0001-0415	0.987	101.616	0	457	63.397	29.916	0.8	100.264	19307	1.35	0.741	0.884	1.32694		648	CEP170_KAN618-1_5.tif:0001-0415	0.987	76.579	0	308	63.397	29.916	0.8	75.56	14550	1.35	0.741	0.884
641	CEP83_KAN618-1_5.tif:0002-0423	1.189	91.996	0	608	10.819	30.476	0.824	109.404	21067	1.59	0.629	0.891	1.12634		649	CEP170_KAN618-1_5.tif:0002-0423	1.189	81.677	0	299	10.819	30.476	0.824	97.133	18704	1.59	0.629	0.891
642	CEP83_KAN618-1_5.tif:0003-0577	1.444	147.745	0	1169	86.65	41.577	0.824	213.298	41073	1.252	0.799	0.9	1.30308		650	CEP170_KAN618-1_5.tif:0003-0577	1.444	113.381	0	602	86.65	41.577	0.824	163.688	31520	1.252	0.799	0.9
643	CEP83_KAN618-1_5.tif:0004-0577	1.137	107.169	0	515	34.314	41.566	0.851	121.883	23470	1.537	0.651	0.924	1.51234		651	CEP170_KAN618-1_5.tif:0004-0577	1.137	70.863	0	281	34.314	41.566	0.851	80.592	15519	1.537	0.651	0.924
644	CEP83_KAN618-1_5.tif:0005-0811	1.127	104.493	0	663	10.213	58.446	0.843	117.755	22675	1.311	0.763	0.908	0.949341		652	CEP170_KAN618-1_5.tif:0005-0811	1.127	110.069	0	397	10.213	58.446	0.843	124.038	23885	1.311	0.763	0.908
645	CEP83_KAN618-1_5.tif:0006-0817	1.137	116.091	0	695	88.801	58.835	0.848	132.031	25424	1.354	0.738	0.952	1.41796		653	CEP170_KAN618-1_5.tif:0006-0817	1.137	81.872	0	337	88.801	58.835	0.848	93.113	17930	1.354	0.738	0.952
646	CEP83_KAN618-1_5.tif:0007-1009	0.945	110.22	0	608	22.338	72.75	0.823	104.175	20060	1.121	0.892	0.933	1.81292		654	CEP170_KAN618-1_5.tif:0007-1009	0.945	60.797	0	232	22.338	72.75	0.823	57.462	11065	1.121	0.892	0.933
647	CEP83_KAN618-1_5.tif:0008-1215	1.132	112.243	0	739	58.785	87.516	0.806	127.071	24469	1.329	0.752	0.883	1.36462		655	CEP170_KAN618-1_5.tif:0008-1215	1.132	82.252	0	305	58.785	87.516	0.806	93.118	17931	1.329	0.752	0.883
656	CEP83_KAN618-1_6.tif:0001-0096	0.94	92.685	0	365	12.601	6.878	0.667	87.12	16776	1.996	0.501	0.842	1.70574		662	CEP170_KAN618-1_6.tif:0001-0096	0.94	54.337	0	270	12.601	6.878	0.667	51.075	9835	1.996	0.501	0.842
657	CEP83_KAN618-1_6.tif:0002-0430	0.566	89.431	0	330	47.116	31.034	0.703	50.623	9748	1.72	0.581	0.832	1.34622		663	CEP170_KAN618-1_6.tif:0002-0430	0.566	66.431	0	205	47.116	31.034	0.703	37.604	7241	1.72	0.581	0.832
658	CEP83_KAN618-1_6.tif:0003-0606	0.701	68.474	0	308	35.142	43.691	0.861	48.005	9244	1.498	0.668	0.928	0.796073		664	CEP170_KAN618-1_6.tif:0003-0606	0.701	86.015	0	243	35.142	43.691	0.861	60.303	11612	1.498	0.668	0.928
659	CEP83_KAN618-1_6.tif:0004-0743	0.613	24.314	0	191	16.788	53.592	0.782	14.899	2869	1.725	0.58	0.891	0.246372		665	CEP170_KAN618-1_6.tif:0004-0743	0.613	98.686	0	246	16.788	53.592	0.782	60.474	11645	1.725	0.58	0.891
660	CEP83_KAN618-1_6.tif:0005-0889	0.66	125.394	0	471	78.195	64.106	0.789	82.701	15925	1.691	0.591	0.894	2.11938		666	CEP170_KAN618-1_6.tif:0005-0889	0.66	59.165	0	194	78.195	64.106	0.789	39.021	7514	1.691	0.591	0.894
661	CEP83_KAN618-1_6.tif:0006-1131	0.867	138.605	0	642	56.65	81.523	0.909	120.206	23147	1.091	0.917	0.925	1.46426		667	CEP170_KAN618-1_6.tif:0006-1131	0.867	94.659	0	217	56.65	81.523	0.909	82.093	15808	1.091	0.917	0.925
									AVERAGE	22038			AVERAGE	1.04598
									S.E.M.	1302.98			S.E.M.	0.0852677
668	CEP83_KAN618-2_1.tif:0001-0051	1.205	107.228	0	553	23.89	3.69	0.724	129.19	24877	1.918	0.521	0.869	1.18072		674	CEP170_KAN618-2_1.tif:0002-0327	0.862	123.452	0	358	80.645	23.625	0.882	106.423	20493	1.37	0.73	0.938
669	CEP83_KAN618-2_1.tif:0002-0327	0.862	23.373	0	268	80.645	23.625	0.882	20.149	3880	1.37	0.73	0.938	0.184154		675	CEP170_KAN618-2_1.tif:0003-0747	1.361	57.687	0	266	41.939	53.82	0.742	78.489	15114	1.994	0.501	0.894
670	CEP83_KAN618-2_1.tif:0003-0747	1.361	85.24	0	579	41.939	53.82	0.742	115.979	22333	1.994	0.501	0.894	1.05998		676	CEP170_KAN618-2_1.tif:0004-0786	1.044	111.363	0	418	76.699	56.622	0.804	116.243	22384	1.211	0.826	0.895
671	CEP83_KAN618-2_1.tif:0004-0786	1.044	50.995	0	332	76.699	56.622	0.804	53.23	10250	1.211	0.826	0.895	0.48649		677	CEP170_KAN618-2_1.tif:0005-1204	1.033	63.754	0	373	49.315	86.827	0.673	65.885	12687	2.412	0.415	0.888
672	CEP83_KAN618-2_1.tif:0005-1204	1.033	62.352	0	528	49.315	86.827	0.673	64.437	12408	2.412	0.415	0.888	0.588914		688	CEP170_KAN618-2_2.tif:0001-0061	0.597	121.87	0	408	44.348	4.392	0.952	72.782	14015	1.128	0.887	0.947
678	CEP83_KAN618-2_2.tif:0001-0061	0.597	16.652	0	112	44.348	4.392	0.952	9.945	1915	1.128	0.887	0.947	0.0908905		689	CEP170_KAN618-2_2.tif:0002-0145	0.774	68.262	0	175	78.612	10.407	0.773	52.819	10171	1.466	0.682	0.871
679	CEP83_KAN618-2_2.tif:0002-0145	0.774	104.685	0	519	78.612	10.407	0.773	81.003	15598	1.466	0.682	0.871	0.740319		690	CEP170_KAN618-2_2.tif:0003-0245	1.111	89.995	0	396	33.978	17.625	0.893	100.015	19259	1.331	0.751	0.932
680	CEP83_KAN618-2_2.tif:0003-0245	1.111	156.126	0	757	33.978	17.625	0.893	173.508	33411	1.331	0.751	0.932	1.58577		691	CEP170_KAN618-2_2.tif:0004-0472	1.283	84.437	0	308	82.136	34.048	0.809	108.308	20856	1.644	0.608	0.885
681	CEP83_KAN618-2_2.tif:0004-0472	1.283	106.547	0	751	82.136	34.048	0.809	136.668	26317	1.644	0.608	0.885	1.24907		692	CEP170_KAN618-2_2.tif:0005-0501	0.909	105.177	0	332	31.574	36.128	0.887	95.585	18406	1.361	0.735	0.949
682	CEP83_KAN618-2_2.tif:0005-0501	0.909	124.926	0	485	31.574	36.128	0.887	113.533	21862	1.361	0.735	0.949	1.03762		693	CEP170_KAN618-2_2.tif:0006-0684	0.81	111.308	0	281	21.207	49.252	0.817	90.174	17364	1.112	0.899	0.902
683	CEP83_KAN618-2_2.tif:0006-0684	0.81	63.603	0	272	21.207	49.252	0.817	51.526	9922	1.112	0.899	0.902	0.470922		694	CEP170_KAN618-2_2.tif:0007-0739	0.68	137.382	0	385	53.063	53.278	0.927	93.461	17997	1.193	0.838	0.967
684	CEP83_KAN618-2_2.tif:0007-0739	0.68	45.489	0	170	53.063	53.278	0.927	30.946	5959	1.193	0.838	0.967	0.282828		695	CEP170_KAN618-2_2.tif:0008-0978	1.002	96.187	0	339	37.586	70.52	0.82	96.406	18564	1.542	0.649	0.928
685	CEP83_KAN618-2_2.tif:0008-0978	1.002	64.85	0	373	37.586	70.52	0.82	64.997	12516	1.542	0.649	0.928	0.594039		696	CEP170_KAN618-2_2.tif:0009-1262	0.711	152.241	0	505	91.264	90.96	0.932	108.313	20857	1.091	0.916	0.955
686	CEP83_KAN618-2_2.tif:0009-1262	0.711	30.942	0	95	91.264	90.96	0.932	22.014	4239	1.091	0.916	0.955	0.201193		697	CEP170_KAN618-2_2.tif:0010-1269	0.826	64.805	0	204	55.616	91.389	0.762	53.51	10304	1.589	0.629	0.886
687	CEP83_KAN618-2_2.tif:0010-1269	0.826	125.723	0	511	55.616	91.389	0.762	103.811	19990	1.589	0.629	0.886	0.948774		706	CEP170_KAN618-2_3.tif:0001-0299	1.002	86.591	0	327	38.142	21.581	0.717	86.788	16712	2.323	0.43	0.948
698	CEP83_KAN618-2_3.tif:0001-0299	1.002	70.14	0	341	38.142	21.581	0.717	70.3	13537	2.323	0.43	0.948	0.642499		707	CEP170_KAN618-2_3.tif:0002-0373	0.675	73.7	0	263	55.258	26.953	0.73	49.756	9581	2.122	0.471	0.922
699	CEP83_KAN618-2_3.tif:0002-0373	0.675	74.931	0	320	55.258	26.953	0.73	50.586	9741	2.122	0.471	0.922	0.462331		708	CEP170_KAN618-2_3.tif:0003-0439	0.924	91.096	0	356	80.791	31.625	0.834	84.207	16215	1.65	0.606	0.92
700	CEP83_KAN618-2_3.tif:0003-0439	0.924	101.466	0	387	80.791	31.625	0.834	93.793	18061	1.65	0.606	0.92	0.857219		709	CEP170_KAN618-2_3.tif:0004-0652	1.122	47.444	0	188	37.156	46.988	0.685	53.219	10248	2.156	0.464	0.891
701	CEP83_KAN618-2_3.tif:0004-0652	1.122	70.125	0	405	37.156	46.988	0.685	78.661	15147	2.156	0.464	0.891	0.718913		710	CEP170_KAN618-2_3.tif:0005-0677	0.628	40.917	0	202	59.872	48.818	0.78	25.711	4951	1.608	0.622	0.89
702	CEP83_KAN618-2_3.tif:0005-0677	0.628	125.901	0	563	59.872	48.818	0.78	79.112	15234	1.608	0.622	0.89	0.723042		711	CEP170_KAN618-2_3.tif:0006-0688	0.836	55.503	0	258	1.357	49.55	0.827	46.406	8936	1.506	0.664	0.892
703	CEP83_KAN618-2_3.tif:0006-0688	0.836	119.863	0	515	1.357	49.55	0.827	100.217	19298	1.506	0.664	0.892	0.91593		712	CEP170_KAN618-2_3.tif:0007-1049	0.545	110.41	0	270	34.034	75.573	0.896	60.204	11593	1.294	0.773	0.905
704	CEP83_KAN618-2_3.tif:0007-1049	0.545	44.371	0	256	34.034	75.573	0.896	24.195	4659	1.294	0.773	0.905	0.221127		713	CEP170_KAN618-2_3.tif:0008-1251	0.644	74.71	0	172	83.726	90.169	0.867	48.109	9264	1.124	0.889	0.899
705	CEP83_KAN618-2_3.tif:0008-1251	0.644	137.863	0	560	83.726	90.169	0.867	88.777	17095	1.124	0.889	0.899	0.81137		723	CEP170_KAN618-2_4.tif:0001-0156	0.644	5.694	0	32	4.704	11.247	0.913	3.666	706	1.127	0.887	0.973
714	CEP83_KAN618-2_4.tif:0001-0156	0.644	304.895	0	1375	4.704	11.247	0.913	196.337	37807	1.127	0.887	0.973	1.79441		724	CEP170_KAN618-2_4.tif:0002-0212	1.35	77.392	0	344	80.394	15.265	0.774	104.497	20122	1.859	0.538	0.945
715	CEP83_KAN618-2_4.tif:0002-0212	1.35	83.946	0	696	80.394	15.265	0.774	113.346	21826	1.859	0.538	0.945	1.03591		725	CEP170_KAN618-2_4.tif:0003-0225	0.872	103.696	0	232	45.4	16.225	0.714	90.47	17421	1.186	0.843	0.842
716	CEP83_KAN618-2_4.tif:0003-0225	0.872	26.56	0	123	45.4	16.225	0.714	23.172	4462	1.186	0.843	0.842	0.211777		726	CEP170_KAN618-2_4.tif:0004-0427	0.545	103.095	0	245	47.34	30.822	0.809	56.216	10825	1.178	0.849	0.868
717	CEP83_KAN618-2_4.tif:0004-0427	0.545	20.01	0	105	47.34	30.822	0.809	10.911	2101	1.178	0.849	0.868	0.0997185		727	CEP170_KAN618-2_4.tif:0005-0461	1.179	54.251	0	239	22.573	33.239	0.671	63.954	12315	2.393	0.418	0.866
718	CEP83_KAN618-2_4.tif:0005-0461	1.179	70.308	0	423	22.573	33.239	0.671	82.883	15960	2.393	0.418	0.866	0.7575		728	CEP170_KAN618-2_4.tif:0006-0591	1.132	132.422	0	497	77.072	42.649	0.83	149.916	28868	1.073	0.932	0.899
719	CEP83_KAN618-2_4.tif:0006-0591	1.132	72.908	0	423	77.072	42.649	0.83	82.54	15894	1.073	0.932	0.899	0.754368		729	CEP170_KAN618-2_4.tif:0007-0937	0.852	100.884	0	230	34.108	67.551	0.851	85.921	16545	1.349	0.741	0.914
720	CEP83_KAN618-2_4.tif:0007-0937	0.852	95.36	0	505	34.108	67.551	0.851	81.216	15639	1.349	0.741	0.914	0.742265		730	CEP170_KAN618-2_4.tif:0008-1046	0.602	101.526	0	213	91.283	75.43	0.834	61.16	11777	1.446	0.691	0.896
721	CEP83_KAN618-2_4.tif:0008-1046	0.602	27.009	0	122	91.283	75.43	0.834	16.27	3133	1.446	0.691	0.896	0.1487		731	CEP170_KAN618-2_4.tif:0009-1210	1.137	69.667	0	249	66.81	87.27	0.702	79.232	15257	2.296	0.435	0.874
722	CEP83_KAN618-2_4.tif:0009-1210	1.137	81.831	0	552	66.81	87.27	0.702	93.066	17921	2.296	0.435	0.874	0.850574		737	CEP170_KAN618-2_5.tif:0001-0353	0.81	95.615	0	298	69.942	25.462	0.889	77.461	14916	1.063	0.941	0.929
732	CEP83_KAN618-2_5.tif:0001-0353	0.81	66.09	0	358	69.942	25.462	0.889	53.541	10310	1.063	0.941	0.929	0.489337		738	CEP170_KAN618-2_5.tif:0002-0396	0.753	84.69	0	316	46.769	28.528	0.817	63.772	12280	1.747	0.573	0.901
733	CEP83_KAN618-2_5.tif:0002-0396	0.753	73.359	0	350	46.769	28.528	0.817	55.24	10637	1.747	0.573	0.901	0.504858		739	CEP170_KAN618-2_5.tif:0003-0642	0.924	73.657	0	286	53.884	46.22	0.842	68.087	13111	1.095	0.913	0.93
734	CEP83_KAN618-2_5.tif:0003-0642	0.924	71.596	0	350	53.884	46.22	0.842	66.181	12744	1.095	0.913	0.93	0.604861		740	CEP170_KAN618-2_5.tif:0004-1194	0.535	97.029	0	237	47.724	86.047	0.863	51.9	9994	1.483	0.674	0.958
735	CEP83_KAN618-2_5.tif:0004-1194	0.535	16.65	0	187	47.724	86.047	0.863	8.906	1715	1.483	0.674	0.958	0.081398		741	CEP170_KAN618-2_5.tif:0005-1209	1.054	84.537	0	266	82.999	87.221	0.708	89.12	17161	1.55	0.645	0.842
736	CEP83_KAN618-2_5.tif:0005-1209	1.054	68.897	0	338	82.999	87.221	0.708	72.631	13986	1.55	0.645	0.842	0.663809		745	CEP170_KAN618-2_6.tif:0001-0250	0.971	88.818	0	429	37.428	18.102	0.83	86.253	16609	1.099	0.91	0.912
742	CEP83_KAN618-2_6.tif:0001-0250	0.971	85.679	0	444	37.428	18.102	0.83	83.205	16022	1.099	0.91	0.912	0.760443		746	CEP170_KAN618-2_6.tif:0002-0767	0.831	130.725	0	359	85.283	55.311	0.915	108.62	20916	1.1	0.909	0.925
743	CEP83_KAN618-2_6.tif:0002-0767	0.831	60.056	0	292	85.283	55.311	0.915	49.901	9609	1.1	0.909	0.925	0.456066		747	CEP170_KAN618-2_6.tif:0003-0896	0.54	92.029	0	177	11.1	64.597	0.871	49.704	9571	1.204	0.83	0.937
744	CEP83_KAN618-2_6.tif:0003-0896	0.54	33.423	0	120	11.1	64.597	0.871	18.051	3476	1.204	0.83	0.937	0.164979		750	CEP170_KAN618-2_7.tif:0001-0092	1.023	73.701	0	299	24.219	6.621	0.785	75.399	14519	1.777	0.563	0.938
748	CEP83_KAN618-2_7.tif:0001-0092	1.023	95.041	0	407	24.219	6.621	0.785	97.231	18723	1.777	0.563	0.938	0.888639		751	CEP170_KAN618-2_7.tif:0002-0838	0.732	112	0	234	79.328	60.382	0.924	82.01	15792	1.203	0.831	0.937
749	CEP83_KAN618-2_7.tif:0002-0838	0.732	13.454	0	119	79.328	60.382	0.924	9.851	1897	1.203	0.831	0.937	0.0900362		761	CEP170_KAN618-3_1.tif:0001-0079	0.654	120.5	0	309	74.55	5.644	0.804	78.848	15183	1.283	0.78	0.875
									AVERAGE	13621.7			AVERAGE	0.646518
752	CEP83_KAN618-3_1.tif:0001-0079	0.654	24.016	0	97	74.55	5.644	0.804	15.714	3026	1.283	0.78	0.875	0.143621		762	CEP170_KAN618-3_1.tif:0002-0132	1.002	114.959	0	405	41.134	9.552	0.806	115.22	22187	1.515	0.66	0.879
753	CEP83_KAN618-3_1.tif:0002-0132	1.002	26.772	0	145	41.134	9.552	0.806	26.833	5167	1.515	0.66	0.879	0.245238		763	CEP170_KAN618-3_1.tif:0003-0193	0.582	101.723	0	258	1.951	13.962	0.742	59.166	11393	1.388	0.72	0.845
754	CEP83_KAN618-3_1.tif:0003-0193	0.582	20	0	64	1.951	13.962	0.742	11.633	2240	1.388	0.72	0.845	0.106316		764	CEP170_KAN618-3_1.tif:0004-0311	0.93	124.944	0	342	33.244	22.438	0.812	116.145	22365	1.528	0.654	0.891
755	CEP83_KAN618-3_1.tif:0004-0311	0.93	20.447	0	131	33.244	22.438	0.812	19.007	3660	1.528	0.654	0.891	0.173712		765	CEP170_KAN618-3_1.tif:0005-0547	0.634	110.795	0	228	78.808	39.424	0.877	70.196	13517	1.354	0.739	0.9
756	CEP83_KAN618-3_1.tif:0005-0547	0.634	17.27	0	110	78.808	39.424	0.877	10.942	2107	1.354	0.739	0.9	0.100003		766	CEP170_KAN618-3_1.tif:0006-0683	0.654	120.262	0	317	27.03	49.275	0.906	78.692	15153	1.219	0.82	0.926
757	CEP83_KAN618-3_1.tif:0006-0683	0.654	28.802	0	124	27.03	49.275	0.906	18.846	3629	1.219	0.82	0.926	0.172241		767	CEP170_KAN618-3_1.tif:0007-0695	0.618	116.294	0	336	13.775	50.143	0.819	71.868	13839	1.425	0.702	0.915
758	CEP83_KAN618-3_1.tif:0007-0695	0.618	28.798	0	116	13.775	50.143	0.819	17.797	3427	1.425	0.702	0.915	0.162654		768	CEP170_KAN618-3_1.tif:0008-0883	0.867	91.365	0	239	44.196	63.629	0.8	79.237	15258	1.27	0.787	0.888
759	CEP83_KAN618-3_1.tif:0008-0883	0.867	23.497	0	148	44.196	63.629	0.8	20.378	3924	1.27	0.787	0.888	0.186242		769	CEP170_KAN618-3_1.tif:0009-1056	0.846	127.632	0	453	56.697	76.174	0.854	108.038	20804	1.114	0.897	0.931
760	CEP83_KAN618-3_1.tif:0009-1056	0.846	32.117	0	138	56.697	76.174	0.854	27.186	5235	1.114	0.897	0.931	0.248466		776	CEP170_KAN618-3_2.tif:0001-0165	0.852	158.329	0	618	26.164	11.894	0.925	134.845	25966	1.354	0.739	0.951
770	CEP83_KAN618-3_2.tif:0001-0165	0.852	62.323	0	201	26.164	11.894	0.925	53.079	10221	1.354	0.739	0.951	0.485113		777	CEP170_KAN618-3_2.tif:0002-0252	0.779	117.367	0	380	79.224	18.131	0.88	91.425	17605	1.36	0.735	0.901
771	CEP83_KAN618-3_2.tif:0002-0252	0.779	25.107	0	155	79.224	18.131	0.88	19.557	3766	1.36	0.735	0.901	0.178743		778	CEP170_KAN618-3_2.tif:0003-0314	1.288	87.508	0	341	36.394	22.62	0.782	112.702	21702	1.801	0.555	0.897
772	CEP83_KAN618-3_2.tif:0003-0314	1.288	112.673	0	820	36.394	22.62	0.782	145.112	27943	1.801	0.555	0.897	1.32624		779	CEP170_KAN618-3_2.tif:0004-0785	0.743	106.916	0	252	62.39	56.636	0.835	79.398	15289	1.249	0.8	0.938
773	CEP83_KAN618-3_2.tif:0004-0785	0.743	33.538	0	144	62.39	56.636	0.835	24.906	4796	1.249	0.8	0.938	0.22763		780	CEP170_KAN618-3_2.tif:0005-0908	0.737	111.345	0	277	86.353	65.416	0.829	82.109	15811	1.83	0.547	0.931
774	CEP83_KAN618-3_2.tif:0005-0908	0.737	17.845	0	90	86.353	65.416	0.829	13.159	2534	1.83	0.547	0.931	0.12027		781	CEP170_KAN618-3_2.tif:0006-1026	0.706	100.912	0	253	42.145	73.904	0.854	71.271	13724	1.325	0.755	0.938
775	CEP83_KAN618-3_2.tif:0006-1026	0.706	100.051	0	454	42.145	73.904	0.854	70.663	13607	1.325	0.755	0.938	0.645821		793	CEP170_KAN618-3_3.tif:0001-0096	0.576	105.063	0	263	24.453	6.909	0.976	60.562	11662	1.114	0.897	0.941
782	CEP83_KAN618-3_3.tif:0001-0096	0.576	26.649	0	163	24.453	6.909	0.976	15.361	2958	1.114	0.897	0.941	0.140394		794	CEP170_KAN618-3_3.tif:0002-0108	0.893	123.203	0	482	37.778	7.807	0.863	110.048	21191	1.195	0.837	0.894
783	CEP83_KAN618-3_3.tif:0002-0108	0.893	20.872	0	103	37.778	7.807	0.863	18.643	3590	1.195	0.837	0.894	0.17039		795	CEP170_KAN618-3_3.tif:0003-0165	0.898	110.445	0	280	56.54	11.869	0.84	99.225	19107	1.146	0.873	0.878
784	CEP83_KAN618-3_3.tif:0003-0165	0.898	31.832	0	175	56.54	11.869	0.84	28.599	5507	1.146	0.873	0.878	0.261375		796	CEP170_KAN618-3_3.tif:0004-0261	1.028	147.864	0	550	34.518	18.821	0.816	152.04	29277	1.539	0.65	0.919
785	CEP83_KAN618-3_3.tif:0004-0261	1.028	28.53	0	194	34.518	18.821	0.816	29.336	5649	1.539	0.65	0.919	0.268115		797	CEP170_KAN618-3_3.tif:0005-0496	0.976	108.426	0	356	85.727	35.743	0.737	105.857	20384	1.717	0.582	0.87
786	CEP83_KAN618-3_3.tif:0005-0496	0.976	42.218	0	192	85.727	35.743	0.737	41.218	7937	1.717	0.582	0.87	0.376709		798	CEP170_KAN618-3_3.tif:0006-0735	0.904	149.19	0	460	19.328	52.922	0.865	134.809	25959	1.082	0.924	0.902
787	CEP83_KAN618-3_3.tif:0006-0735	0.904	20.5	0	158	19.328	52.922	0.865	18.524	3567	1.082	0.924	0.902	0.169298		799	CEP170_KAN618-3_3.tif:0007-0739	0.66	110.228	0	348	37.476	53.265	0.864	72.699	13999	1.223	0.818	0.907
788	CEP83_KAN618-3_3.tif:0007-0739	0.66	38.299	0	209	37.476	53.265	0.864	25.259	4864	1.223	0.818	0.907	0.230857		800	CEP170_KAN618-3_3.tif:0008-0812	0.867	132.539	0	398	58.522	58.523	0.866	114.945	22134	1.411	0.709	0.93
789	CEP83_KAN618-3_3.tif:0008-0812	0.867	29.994	0	121	58.522	58.523	0.866	26.012	5009	1.411	0.709	0.93	0.237739		801	CEP170_KAN618-3_3.tif:0009-0840	0.857	134.388	0	373	75.18	60.548	0.921	115.153	22174	1.245	0.803	0.922
790	CEP83_KAN618-3_3.tif:0009-0840	0.857	19.909	0	97	75.18	60.548	0.921	17.059	3285	1.245	0.803	0.922	0.155914		802	CEP170_KAN618-3_3.tif:0010-0854	0.743	120.58	0	325	8.485	61.535	0.844	89.545	17243	1.176	0.85	0.932
791	CEP83_KAN618-3_3.tif:0010-0854	0.743	17.566	0	72	8.485	61.535	0.844	13.045	2512	1.176	0.85	0.932	0.119226		803	CEP170_KAN618-3_3.tif:0011-0936	0.732	65.915	0	269	26.913	67.54	0.652	48.265	9294	2.132	0.469	0.847
792	CEP83_KAN618-3_3.tif:0011-0936	0.732	68.773	0	332	26.913	67.54	0.652	50.358	9697	2.132	0.469	0.847	0.460243		812	CEP170_KAN618-3_4.tif:0001-0112	0.872	111.244	0	347	44.829	8.134	0.805	97.055	18689	1.204	0.83	0.88
804	CEP83_KAN618-3_4.tif:0001-0112	0.872	15.899	0	101	44.829	8.134	0.805	13.871	2671	1.204	0.83	0.88	0.126772		813	CEP170_KAN618-3_4.tif:0002-0271	0.982	150.958	0	546	21.789	19.502	0.897	148.166	28531	1.184	0.844	0.931
805	CEP83_KAN618-3_4.tif:0002-0271	0.982	27.063	0	169	21.789	19.502	0.897	26.563	5115	1.184	0.844	0.931	0.24277		814	CEP170_KAN618-3_4.tif:0003-0600	0.634	112.689	0	257	88.525	43.252	0.84	71.395	13748	1.384	0.723	0.931
806	CEP83_KAN618-3_4.tif:0003-0600	0.634	28.828	0	95	88.525	43.252	0.84	18.264	3517	1.384	0.723	0.931	0.166925		815	CEP170_KAN618-3_4.tif:0004-0743	0.784	106.715	0	274	39.34	53.581	0.831	83.682	16114	1.38	0.724	0.918
807	CEP83_KAN618-3_4.tif:0004-0743	0.784	27.205	0	104	39.34	53.581	0.831	21.333	4108	1.38	0.724	0.918	0.194976		816	CEP170_KAN618-3_4.tif:0005-0877	0.711	169.737	0	713	82.732	63.237	0.958	120.761	23254	1.111	0.9	0.948
808	CEP83_KAN618-3_4.tif:0005-0877	0.711	18.022	0	114	82.732	63.237	0.958	12.822	2469	1.111	0.9	0.948	0.117185		817	CEP170_KAN618-3_4.tif:0006-0973	0.602	131.328	0	399	51.883	70.153	0.932	79.112	15234	1.139	0.878	0.951
809	CEP83_KAN618-3_4.tif:0006-0973	0.602	24.388	0	110	51.883	70.153	0.932	14.691	2829	1.139	0.878	0.951	0.134271		818	CEP170_KAN618-3_4.tif:0007-1090	0.821	123.032	0	345	72.687	78.574	0.869	100.95	19439	1.525	0.656	0.938
810	CEP83_KAN618-3_4.tif:0007-1090	0.821	27.399	0	138	72.687	78.574	0.869	22.481	4329	1.525	0.656	0.938	0.205465		819	CEP170_KAN618-3_4.tif:0008-1098	0.592	102.439	0	256	17.633	79.116	0.853	60.646	11678	1.584	0.631	0.908
811	CEP83_KAN618-3_4.tif:0008-1098	0.592	24.298	0	105	17.633	79.116	0.853	14.385	2770	1.584	0.631	0.908	0.131471		828	CEP170_KAN618-3_5.tif:0001-0214	1.018	138.48	0	484	40.891	15.467	0.873	140.952	27142	1.263	0.792	0.899
820	CEP83_KAN618-3_5.tif:0001-0214	1.018	32.923	0	143	40.891	15.467	0.873	33.511	6453	1.263	0.792	0.899	0.306275		829	CEP170_KAN618-3_5.tif:0002-0420	0.924	89.798	0	266	65.681	30.269	0.727	83.007	15984	1.286	0.778	0.83
821	CEP83_KAN618-3_5.tif:0002-0420	0.924	27.927	0	187	65.681	30.269	0.727	25.815	4971	1.286	0.778	0.83	0.235936		830	CEP170_KAN618-3_5.tif:0003-0628	0.893	146.39	0	491	49.819	45.245	0.884	130.758	25179	1.353	0.739	0.917
822	CEP83_KAN618-3_5.tif:0003-0628	0.893	14.866	0	105	49.819	45.245	0.884	13.279	2557	1.353	0.739	0.917	0.121361		831	CEP170_KAN618-3_5.tif:0004-0645	0.602	110.138	0	298	13.302	46.447	0.821	66.348	12776	1.653	0.605	0.928
823	CEP83_KAN618-3_5.tif:0004-0645	0.602	8.483	0	51	13.302	46.447	0.821	5.11	984	1.653	0.605	0.928	0.046703		832	CEP170_KAN618-3_5.tif:0005-0797	0.727	114.379	0	294	72.61	57.479	0.917	83.158	16013	1.475	0.678	0.94
824	CEP83_KAN618-3_5.tif:0005-0797	0.727	22.764	0	88	72.61	57.479	0.917	16.551	3187	1.475	0.678	0.94	0.151263		833	CEP170_KAN618-3_5.tif:0006-0882	0.582	101.804	0	213	22.044	63.618	0.762	59.212	11402	1.926	0.519	0.889
825	CEP83_KAN618-3_5.tif:0006-0882	0.582	19.875	0	104	22.044	63.618	0.762	11.56	2226	1.926	0.519	0.889	0.105651		834	CEP170_KAN618-3_5.tif:0007-0928	0.846	90.515	0	253	54.582	66.807	0.723	76.62	14754	1.326	0.754	0.838
826	CEP83_KAN618-3_5.tif:0007-0928	0.846	15.417	0	83	54.582	66.807	0.723	13.05	2513	1.326	0.754	0.838	0.119273		835	CEP170_KAN618-3_5.tif:0008-1072	0.732	119.603	0	336	86.636	77.276	0.899	87.577	16864	1.077	0.928	0.931
827	CEP83_KAN618-3_5.tif:0008-1072	0.732	23.652	0	111	86.636	77.276	0.899	17.319	3335	1.077	0.928	0.931	0.158287		841	CEP170_KAN618-3_6.tif:0001-0111	0.706	108.316	0	279	71.595	7.996	0.823	76.5	14731	1.671	0.599	0.935
836	CEP83_KAN618-3_6.tif:0001-0111	0.706	28.662	0	163	71.595	7.996	0.823	20.243	3898	1.671	0.599	0.935	0.185008		842	CEP170_KAN618-3_6.tif:0002-0254	0.639	119.057	0	324	8.6	18.301	0.921	76.048	14644	1.113	0.898	0.943
837	CEP83_KAN618-3_6.tif:0002-0254	0.639	24.642	0	96	8.6	18.301	0.921	15.74	3031	1.113	0.898	0.943	0.143859		843	CEP170_KAN618-3_6.tif:0003-0559	0.592	123.018	0	368	61.265	40.342	0.943	72.829	14024	1.054	0.949	0.95
838	CEP83_KAN618-3_6.tif:0003-0559	0.592	17.868	0	91	61.265	40.342	0.943	10.578	2037	1.054	0.949	0.95	0.0966809		844	CEP170_KAN618-3_6.tif:0004-0892	0.54	127.558	0	419	16.292	64.31	0.898	68.892	13266	1.082	0.924	0.941
839	CEP83_KAN618-3_6.tif:0004-0892	0.54	10.654	0	59	16.292	64.31	0.898	5.754	1108	1.082	0.924	0.941	0.0525883		845	CEP170_KAN618-3_6.tif:0005-1106	0.628	113.033	0	404	39.518	79.736	0.833	71.027	13677	1.362	0.734	0.931
840	CEP83_KAN618-3_6.tif:0005-1106	0.628	10.752	0	50	39.518	79.736	0.833	6.756	1301	1.362	0.734	0.931	0.0617486		853	CEP170_KAN618-4_1.tif:0001-0113	0.665	110.273	0	269	47.097	8.156	0.895	73.301	14115	1.396	0.716	0.931
										4580.13				0.217384
846	CEP83_KAN618-4_1.tif:0001-0113	0.665	55.227	0	216	47.097	8.156	0.895	36.71	7069	1.396	0.716	0.931	0.335512		854	CEP170_KAN618-4_1.tif:0002-0281	0.654	80.405	0	224	47.311	20.302	0.744	52.612	10131	2.191	0.456	0.913
847	CEP83_KAN618-4_1.tif:0002-0281	0.654	17.77	0	80	47.311	20.302	0.744	11.627	2239	2.191	0.456	0.913	0.106268		855	CEP170_KAN618-4_1.tif:0003-0295	0.852	108.939	0	280	70.533	21.28	0.863	92.781	17866	1.257	0.796	0.899
848	CEP83_KAN618-4_1.tif:0003-0295	0.852	44.152	0	161	70.533	21.28	0.863	37.604	7241	1.257	0.796	0.899	0.343675		856	CEP170_KAN618-4_1.tif:0004-0533	0.872	105.024	0	276	65.818	38.409	0.824	91.628	17644	1.199	0.834	0.894
849	CEP83_KAN618-4_1.tif:0004-0533	0.872	52.869	0	229	65.818	38.409	0.824	46.126	8882	1.199	0.834	0.894	0.421561		857	CEP170_KAN618-4_1.tif:0005-0645	0.774	115.423	0	370	33.34	46.458	0.82	89.312	17198	1.389	0.72	0.874
850	CEP83_KAN618-4_1.tif:0005-0645	0.774	37.685	0	289	33.34	46.458	0.82	29.16	5615	1.389	0.72	0.874	0.266501		858	CEP170_KAN618-4_1.tif:0006-0734	0.784	127.642	0	388	82.579	52.899	0.882	100.093	19274	1.313	0.762	0.935
851	CEP83_KAN618-4_1.tif:0006-0734	0.784	46.411	0	228	82.579	52.899	0.882	36.394	7008	1.313	0.762	0.935	0.332617		859	CEP170_KAN618-4_1.tif:0007-0936	0.836	112.683	0	357	69.628	67.502	0.877	94.214	18142	1.42	0.704	0.928
852	CEP83_KAN618-4_1.tif:0007-0936	0.836	36.323	0	170	69.628	67.502	0.877	30.37	5848	1.42	0.704	0.928	0.27756		867	CEP170_KAN618-4_2.tif:0001-0051	0.54	107.702	0	252	0.82	3.643	0.811	58.168	11201	1.714	0.584	0.916
860	CEP83_KAN618-4_2.tif:0001-0051	0.54	40.548	0	195	0.82	3.643	0.811	21.9	4217	1.714	0.584	0.916	0.200149		868	CEP170_KAN618-4_2.tif:0002-0166	0.727	118.243	0	339	31.416	12.032	0.861	85.967	16554	1.373	0.728	0.915
861	CEP83_KAN618-4_2.tif:0002-0166	0.727	53.614	0	202	31.416	12.032	0.861	38.98	7506	1.373	0.728	0.915	0.356253		869	CEP170_KAN618-4_2.tif:0003-0563	0.711	99.92	0	229	16.036	40.587	0.907	71.089	13689	1.053	0.95	0.955
862	CEP83_KAN618-4_2.tif:0003-0563	0.711	37.577	0	126	16.036	40.587	0.907	26.734	5148	1.053	0.95	0.955	0.244336		870	CEP170_KAN618-4_2.tif:0004-0737	0.805	112.665	0	328	13.743	53.124	0.832	90.688	17463	1.304	0.767	0.906
863	CEP83_KAN618-4_2.tif:0004-0737	0.805	33.445	0	141	13.743	53.124	0.832	26.921	5184	1.304	0.767	0.906	0.246045		871	CEP170_KAN618-4_2.tif:0005-0764	0.545	107.19	1	249	86.341	55.094	0.843	58.449	11255	1.118	0.895	0.909
864	CEP83_KAN618-4_2.tif:0005-0764	0.545	79.857	0	270	86.341	55.094	0.843	43.545	8385	1.118	0.895	0.909	0.397972		872	CEP170_KAN618-4_2.tif:0006-0980	0.93	121.48	0	292	46.66	70.625	0.85	112.925	21745	1.498	0.668	0.913
865	CEP83_KAN618-4_2.tif:0006-0980	0.93	40.38	0	259	46.66	70.625	0.85	37.536	7228	1.498	0.668	0.913	0.343058		873	CEP170_KAN618-4_2.tif:0007-1009	0.665	112.242	0	303	7.34	72.693	0.895	74.61	14367	1.331	0.751	0.921
866	CEP83_KAN618-4_2.tif:0007-1009	0.665	48.258	0	181	7.34	72.693	0.895	32.078	6177	1.331	0.751	0.921	0.293175		880	CEP170_KAN618-4_3.tif:0001-0026	0.862	151.151	0	514	41.504	1.931	0.926	130.301	25091	1.244	0.804	0.93
874	CEP83_KAN618-4_3.tif:0001-0026	0.862	46.584	0	237	41.504	1.931	0.926	40.159	7733	1.244	0.804	0.93	0.367027		881	CEP170_KAN618-4_3.tif:0002-0319	0.743	139.566	0	484	83.581	23.02	0.879	103.645	19958	1.203	0.831	0.932
875	CEP83_KAN618-4_3.tif:0002-0319	0.743	46.979	0	212	83.581	23.02	0.879	34.888	6718	1.203	0.831	0.932	0.318852		882	CEP170_KAN618-4_3.tif:0003-0574	0.857	102.212	0	277	74.676	41.404	0.828	87.582	16865	1.315	0.761	0.892
876	CEP83_KAN618-4_3.tif:0003-0574	0.857	57.982	0	342	74.676	41.404	0.828	49.683	9567	1.315	0.761	0.892	0.454073		883	CEP170_KAN618-4_3.tif:0004-0768	0.846	95.528	0	274	14.624	55.398	0.756	80.862	15571	1.269	0.788	0.842
877	CEP83_KAN618-4_3.tif:0004-0768	0.846	27.227	0	122	14.624	55.398	0.756	23.047	4438	1.269	0.788	0.842	0.210638		884	CEP170_KAN618-4_3.tif:0005-0852	0.821	116.5	0	340	88.525	61.448	0.86	95.59	18407	1.138	0.879	0.893
878	CEP83_KAN618-4_3.tif:0005-0852	0.821	36.867	0	132	88.525	61.448	0.86	30.25	5825	1.138	0.879	0.893	0.276469		885	CEP170_KAN618-4_3.tif:0006-0883	1.168	135.853	0	501	62.875	63.732	0.735	158.739	30567	1.442	0.693	0.907
879	CEP83_KAN618-4_3.tif:0006-0883	1.168	43.098	0	189	62.875	63.732	0.735	50.358	9697	1.442	0.693	0.907	0.460243		890	CEP170_KAN618-4_4.tif:0001-0447	0.717	107.406	0	335	86.332	32.289	0.767	76.973	14822	2.061	0.485	0.942
886	CEP83_KAN618-4_4.tif:0001-0447	0.717	39.623	0	164	86.332	32.289	0.767	28.396	5468	2.061	0.485	0.942	0.259524		891	CEP170_KAN618-4_4.tif:0002-0498	0.649	107.752	0	306	58.422	35.908	0.851	69.946	13469	1.287	0.777	0.912
887	CEP83_KAN618-4_4.tif:0002-0498	0.649	51.896	0	198	58.422	35.908	0.851	33.688	6487	1.287	0.777	0.912	0.307889		892	CEP170_KAN618-4_4.tif:0003-0660	0.909	102.72	0	266	19.481	47.525	0.787	93.352	17976	1.329	0.752	0.858
888	CEP83_KAN618-4_4.tif:0003-0660	0.909	35.229	0	185	19.481	47.525	0.787	32.016	6165	1.329	0.752	0.858	0.292606		893	CEP170_KAN618-4_4.tif:0004-0874	0.758	152.267	0	506	66.393	62.953	0.907	115.449	22231	1.195	0.837	0.957
889	CEP83_KAN618-4_4.tif:0004-0874	0.758	32.884	0	155	66.393	62.953	0.907	24.932	4801	1.195	0.837	0.957	0.227867		900	CEP170_KAN618-4_5.tif:0001-0185	0.904	126.333	0	375	25.37	13.352	0.894	114.156	21982	1.162	0.86	0.923
894	CEP83_KAN618-4_5.tif:0001-0185	0.904	32.42	0	125	25.37	13.352	0.894	29.295	5641	1.162	0.86	0.923	0.267735		901	CEP170_KAN618-4_5.tif:0002-0267	0.561	105.667	0	254	26.936	19.248	0.894	59.264	11412	1.318	0.759	0.915
895	CEP83_KAN618-4_5.tif:0002-0267	0.561	21.75	0	85	26.936	19.248	0.894	12.199	2349	1.318	0.759	0.915	0.111489		902	CEP170_KAN618-4_5.tif:0003-0601	1.127	111.332	0	330	71.365	43.342	0.809	125.461	24159	1.403	0.713	0.91
896	CEP83_KAN618-4_5.tif:0003-0601	1.127	39.429	0	212	71.365	43.342	0.809	44.433	8556	1.403	0.713	0.91	0.406088		903	CEP170_KAN618-4_5.tif:0004-0665	0.66	111.559	0	260	48.993	47.916	0.951	73.577	14168	1.05	0.952	0.948
897	CEP83_KAN618-4_5.tif:0004-0665	0.66	35.913	0	148	48.993	47.916	0.951	23.686	4561	1.05	0.952	0.948	0.216476		904	CEP170_KAN618-4_5.tif:0005-0737	1.007	156.887	0	606	40.656	53.079	0.842	158.059	30436	1.052	0.95	0.917
898	CEP83_KAN618-4_5.tif:0005-0737	1.007	36.206	0	190	40.656	53.079	0.842	36.477	7024	1.052	0.95	0.917	0.333376		905	CEP170_KAN618-4_5.tif:0006-1173	0.571	98.291	0	246	37.276	84.563	0.778	56.148	10812	1.524	0.656	0.884
899	CEP83_KAN618-4_5.tif:0006-1173	0.571	39.509	0	126	37.276	84.563	0.778	22.569	4346	1.524	0.656	0.884	0.206272		911	CEP170_KAN618-4_6.tif:0001-0226	0.576	92.324	0	253	79.714	16.322	0.808	53.219	10248	1.205	0.83	0.888
906	CEP83_KAN618-4_6.tif:0001-0226	0.576	33.099	0	158	79.714	16.322	0.808	19.08	3674	1.205	0.83	0.888	0.174377		912	CEP170_KAN618-4_6.tif:0002-0239	0.571	103.027	0	248	49.74	17.193	0.858	58.854	11333	1.226	0.815	0.917
907	CEP83_KAN618-4_6.tif:0002-0239	0.571	16.655	0	84	49.74	17.193	0.858	9.514	1832	1.226	0.815	0.917	0.0869511		913	CEP170_KAN618-4_6.tif:0003-0336	0.748	89.75	0	291	35.517	24.17	0.885	67.116	12924	1.244	0.804	0.914
908	CEP83_KAN618-4_6.tif:0003-0336	0.748	138.819	0	751	35.517	24.17	0.885	103.811	19990	1.244	0.804	0.914	0.948774		914	CEP170_KAN618-4_6.tif:0004-0702	0.795	123.444	0	387	55.655	50.61	0.931	98.083	18887	1.194	0.837	0.922
909	CEP83_KAN618-4_6.tif:0004-0702	0.795	55.222	0	234	55.655	50.61	0.931	43.877	8449	1.194	0.837	0.922	0.40101		915	CEP170_KAN618-4_6.tif:0005-0850	0.883	129.235	0	441	80.365	61.304	0.822	114.093	21970	1.899	0.527	0.96
910	CEP83_KAN618-4_6.tif:0005-0850	0.883	50.412	0	184	80.365	61.304	0.822	44.505	8570	1.899	0.527	0.96	0.406753		920	CEP170_KAN618-5_1.tif:0001-0352	1.168	54.133	0	249	24.396	25.412	0.755	63.253	12180	1.517	0.659	0.877
										6561.09			AVERAGE	0.311405
													S.E.M.
916	CEP83_KAN618-5_1.tif:0001-0352	1.168	111.938	0	711	24.396	25.412	0.755	130.795	25186	1.517	0.659	0.877	1.19539		921	CEP170_KAN618-5_1.tif:0002-0615	1.049	76.035	0	298	30.54	44.35	0.753	79.762	15359	1.732	0.577	0.882
917	CEP83_KAN618-5_1.tif:0002-0615	1.049	112.579	0	376	30.54	44.35	0.753	118.097	22741	1.732	0.577	0.882	1.07934		922	CEP170_KAN618-5_1.tif:0003-0882	0.587	114.92	0	294	89.39	63.569	0.908	67.438	12986	1.223	0.818	0.946
918	CEP83_KAN618-5_1.tif:0003-0882	0.587	64.531	0	212	89.39	63.569	0.908	37.868	7292	1.223	0.818	0.946	0.346096		923	CEP170_KAN618-5_1.tif:0004-0950	1.002	104.223	0	356	56.874	68.514	0.857	104.46	20115	1.276	0.784	0.917
919	CEP83_KAN618-5_1.tif:0004-0950	1.002	89.363	0	414	56.874	68.514	0.857	89.566	17247	1.276	0.784	0.917	0.818584		931	CEP170_KAN618-5_2.tif:0001-0291	1.018	91.857	0	377	77.221	20.961	0.909	93.497	18004	1.283	0.78	0.936
924	CEP83_KAN618-5_2.tif:0001-0291	1.018	157.796	0	751	77.221	20.961	0.909	160.614	30928	1.283	0.78	0.936	1.46792		932	CEP170_KAN618-5_2.tif:0002-0472	0.561	44.778	0	182	17.742	34.027	0.933	25.114	4836	1.202	0.832	0.956
925	CEP83_KAN618-5_2.tif:0002-0472	0.561	152.472	0	422	17.742	34.027	0.933	85.516	16467	1.202	0.832	0.956	0.781563		933	CEP170_KAN618-5_2.tif:0003-0546	0.545	114.371	0	318	36.263	39.337	0.935	62.365	12009	1.232	0.812	0.946
926	CEP83_KAN618-5_2.tif:0003-0546	0.545	112.59	0	276	36.263	39.337	0.935	61.393	11822	1.232	0.812	0.946	0.561101		934	CEP170_KAN618-5_2.tif:0004-0604	1.08	65.486	0	239	66.524	43.495	0.792	70.736	13621	1.5	0.667	0.879
927	CEP83_KAN618-5_2.tif:0004-0604	1.08	162.524	0	834	66.524	43.495	0.792	175.554	33805	1.5	0.667	0.879	1.60447		935	CEP170_KAN618-5_2.tif:0005-0817	0.774	47.832	0	206	32.548	58.948	0.653	37.012	7127	1.689	0.592	0.799
928	CEP83_KAN618-5_2.tif:0005-0817	0.774	153.517	0	562	32.548	58.948	0.653	118.788	22874	1.689	0.592	0.799	1.08566		936	CEP170_KAN618-5_2.tif:0006-0911	0.971	83.658	0	369	67.439	65.655	0.896	81.242	15644	1.303	0.768	0.935
929	CEP83_KAN618-5_2.tif:0006-0911	0.971	136.417	0	580	67.439	65.655	0.896	132.477	25510	1.303	0.768	0.935	1.21077		937	CEP170_KAN618-5_2.tif:0007-1001	0.821	70.386	0	241	14.773	72.136	0.79	57.753	11121	1.643	0.608	0.903
930	CEP83_KAN618-5_2.tif:0007-1001	0.821	89.481	0	370	14.773	72.136	0.79	73.421	14138	1.643	0.608	0.903	0.671024		943	CEP170_KAN618-5_3.tif:0001-0145	0.691	110.97	0	282	25.665	10.512	0.881	76.646	14759	1.142	0.875	0.937
938	CEP83_KAN618-5_3.tif:0001-0145	0.691	68.842	0	236	25.665	10.512	0.881	47.548	9156	1.142	0.875	0.937	0.434566		944	CEP170_KAN618-5_3.tif:0002-0222	0.696	113.261	0	298	75.605	16.056	0.811	78.816	15177	1.459	0.685	0.908
939	CEP83_KAN618-5_3.tif:0002-0222	0.696	61.784	0	257	75.605	16.056	0.811	42.994	8279	1.459	0.685	0.908	0.392941		945	CEP170_KAN618-5_3.tif:0003-0546	0.982	53.661	0	227	28.079	39.413	0.703	52.669	10142	1.689	0.592	0.859
940	CEP83_KAN618-5_3.tif:0003-0546	0.982	124.058	0	590	28.079	39.413	0.703	121.764	23447	1.689	0.592	0.859	1.11285		946	CEP170_KAN618-5_3.tif:0004-0559	0.68	100.26	0	301	69.313	40.331	0.916	68.207	13134	1.232	0.812	0.946
941	CEP83_KAN618-5_3.tif:0004-0559	0.68	123.145	0	398	69.313	40.331	0.916	83.776	16132	1.232	0.812	0.946	0.765664		947	CEP170_KAN618-5_3.tif:0005-0930	0.852	96.012	0	311	74.197	67.001	0.88	81.771	15746	1.051	0.951	0.945
942	CEP83_KAN618-5_3.tif:0005-0930	0.852	213.201	0	1036	74.197	67.001	0.88	181.578	34965	1.051	0.951	0.945	1.65952		953	CEP170_KAN618-5_4.tif:0001-0233	0.976	126.771	0	485	31.453	16.832	0.901	123.768	23833	1.158	0.863	0.931
948	CEP83_KAN618-5_4.tif:0001-0233	0.976	80.41	0	426	31.453	16.832	0.901	78.505	15117	1.158	0.863	0.931	0.717489		954	CEP170_KAN618-5_4.tif:0002-0431	1.049	86.644	0	389	89.599	31.05	0.869	90.89	17502	1.402	0.713	0.918
949	CEP83_KAN618-5_4.tif:0002-0431	1.049	126.149	0	733	89.599	31.05	0.869	132.332	25482	1.402	0.713	0.918	1.20944		955	CEP170_KAN618-5_4.tif:0003-0722	0.774	113.799	0	313	39.349	52.041	0.94	88.055	16956	1.154	0.866	0.928
950	CEP83_KAN618-5_4.tif:0003-0722	0.774	53.799	0	231	39.349	52.041	0.94	41.628	8016	1.154	0.866	0.928	0.380459		956	CEP170_KAN618-5_4.tif:0004-0878	1.947	50.717	0	302	78.418	63.29	0.704	98.768	19019	1.84	0.544	0.894
951	CEP83_KAN618-5_4.tif:0004-0878	1.947	122.915	0	1029	78.418	63.29	0.704	239.368	46093	1.84	0.544	0.894	2.18768		957	CEP170_KAN618-5_4.tif:0005-0897	0.634	108.59	0	280	51.78	64.59	0.799	68.799	13248	1.677	0.596	0.891
952	CEP83_KAN618-5_4.tif:0005-0897	0.634	22.811	0	122	51.78	64.59	0.799	14.453	2783	1.677	0.596	0.891	0.132088		964	CEP170_KAN618-5_5.tif:0001-0285	1.122	78.523	0	300	88.772	20.632	0.662	88.081	16961	1.378	0.726	0.815
958	CEP83_KAN618-5_5.tif:0001-0285	1.122	114.787	0	806	88.772	20.632	0.662	128.759	24794	1.378	0.726	0.815	1.17678		965	CEP170_KAN618-5_5.tif:0002-0655	1.168	48.178	0	209	10.595	47.252	0.806	56.294	10840	1.781	0.561	0.922
959	CEP83_KAN618-5_5.tif:0002-0655	1.168	126.778	0	614	10.595	47.252	0.806	148.135	28525	1.781	0.561	0.922	1.35387		966	CEP170_KAN618-5_5.tif:0003-0766	1.698	88.156	0	472	58.115	55.273	0.757	149.703	28827	1.744	0.573	0.885
960	CEP83_KAN618-5_5.tif:0003-0766	1.698	87.183	0	794	58.115	55.273	0.757	148.051	28509	1.744	0.573	0.885	1.35311		967	CEP170_KAN618-5_5.tif:0004-0793	1.132	51.844	0	228	88.043	57.176	0.751	58.693	11302	1.838	0.544	0.905
961	CEP83_KAN618-5_5.tif:0004-0793	1.132	129.885	0	695	88.043	57.176	0.751	147.044	28315	1.838	0.544	0.905	1.3439		968	CEP170_KAN618-5_5.tif:0005-1023	0.634	129.943	0	393	4.523	73.69	0.94	82.327	15853	1.06	0.944	0.935
962	CEP83_KAN618-5_5.tif:0005-1023	0.634	43.951	0	202	4.523	73.69	0.94	27.846	5362	1.06	0.944	0.935	0.254493		969	CEP170_KAN618-5_5.tif:0006-1026	1.231	51.346	0	231	36.948	73.957	0.737	63.195	12169	1.692	0.591	0.928
963	CEP83_KAN618-5_5.tif:0006-1026	1.231	111.916	0	788	36.948	73.957	0.737	137.743	26524	1.692	0.591	0.928	1.25889		976	CEP170_KAN618-5_6.tif:0001-0261	1.039	69.06	0	252	50.322	18.886	0.868	71.728	13812	1.325	0.755	0.939
970	CEP83_KAN618-5_6.tif:0001-0261	1.039	140.65	0	702	50.322	18.886	0.868	146.083	28130	1.325	0.755	0.939	1.33512		977	CEP170_KAN618-5_6.tif:0002-0439	1.127	104.894	0	371	77.628	31.719	0.887	118.206	22762	1.213	0.825	0.937
971	CEP83_KAN618-5_6.tif:0002-0439	1.127	173.512	0	1016	77.628	31.719	0.887	195.532	37652	1.213	0.825	0.937	1.78705		978	CEP170_KAN618-5_6.tif:0003-0721	1.122	54.44	0	231	1.069	52.013	0.787	61.066	11759	1.067	0.938	0.923
972	CEP83_KAN618-5_6.tif:0003-0721	1.122	142.269	0	895	1.069	52.013	0.787	159.585	30730	1.067	0.938	0.923	1.45852		979	CEP170_KAN618-5_6.tif:0004-0804	1.278	84.37	0	344	43.556	57.968	0.788	107.784	20755	1.635	0.612	0.911
973	CEP83_KAN618-5_6.tif:0004-0804	1.278	117.528	0	632	43.556	57.968	0.788	150.144	28912	1.635	0.612	0.911	1.37223		980	CEP170_KAN618-5_6.tif:0005-1076	1.298	58.112	0	277	46.514	77.543	0.766	75.446	14528	1.663	0.601	0.882
974	CEP83_KAN618-5_6.tif:0005-1076	1.298	110.908	0	722	46.514	77.543	0.766	143.99	27727	1.663	0.601	0.882	1.31599		981	CEP170_KAN618-5_6.tif:0006-1158	1.111	80.121	0	339	74.738	83.456	0.798	89.042	17146	1.623	0.616	0.903
975	CEP83_KAN618-5_6.tif:0006-1158	1.111	109.383	0	667	74.738	83.456	0.798	121.561	23408	1.623	0.616	0.903	1.111		991	CEP170_KAN618-6_1.tif:0001-0081	0.872	75.161	0	264	26.929	5.805	0.816	65.574	12627	1.77	0.565	0.896
										22305.1				1.05865
										1770.08
982	CEP83_KAN618-6_1.tif:0001-0081	0.872	149.089	0	700	26.929	5.805	0.816	130.073	25047	1.77	0.565	0.896	1.18879		992	CEP170_KAN618-6_1.tif:0002-0133	0.597	13.504	0	62	74.229	9.587	0.935	8.065	1553	1.218	0.821	0.979
983	CEP83_KAN618-6_1.tif:0002-0133	0.597	227.852	0	824	74.229	9.587	0.935	136.076	26203	1.218	0.821	0.979	1.24366		993	CEP170_KAN618-6_1.tif:0003-0417	0.821	87.5	0	217	58.009	30.025	0.82	71.795	13825	1.063	0.941	0.9
984	CEP83_KAN618-6_1.tif:0003-0417	0.821	98.348	0	538	58.009	30.025	0.82	80.696	15539	1.063	0.941	0.9	0.737518		994	CEP170_KAN618-6_1.tif:0004-0465	1.293	62.944	0	284	85.518	33.47	0.755	81.392	15673	2.134	0.469	0.941
985	CEP83_KAN618-6_1.tif:0004-0465	1.293	140.863	0	1021	85.518	33.47	0.755	182.15	35075	2.134	0.469	0.941	1.66474		995	CEP170_KAN618-6_1.tif:0005-0556	0.748	56.583	0	218	32.439	40.056	0.737	42.314	8148	1.714	0.583	0.894
986	CEP83_KAN618-6_1.tif:0005-0556	0.748	103.201	0	430	32.439	40.056	0.737	77.175	14861	1.714	0.583	0.894	0.705339		996	CEP170_KAN618-6_1.tif:0006-0646	0.997	112.281	0	363	61.241	46.579	0.871	111.954	21558	1.235	0.81	0.916
987	CEP83_KAN618-6_1.tif:0006-0646	0.997	95.948	0	479	61.241	46.579	0.871	95.668	18422	1.235	0.81	0.916	0.874352		997	CEP170_KAN618-6_1.tif:0007-0816	1.194	72.122	0	295	42.386	58.766	0.697	86.144	16588	1.702	0.587	0.852
988	CEP83_KAN618-6_1.tif:0007-0816	1.194	98.07	0	605	42.386	58.766	0.697	117.137	22556	1.702	0.587	0.852	1.07056		998	CEP170_KAN618-6_1.tif:0008-0897	0.893	68.884	0	287	29.689	64.695	0.731	61.528	11848	1.515	0.66	0.851
989	CEP83_KAN618-6_1.tif:0008-0897	0.893	95.907	0	508	29.689	64.695	0.731	85.666	16496	1.515	0.66	0.851	0.78294		999	CEP170_KAN618-6_1.tif:0009-1129	1.366	83.004	0	552	76.998	81.411	0.763	113.366	21830	1.69	0.592	0.913
990	CEP83_KAN618-6_1.tif:0009-1129	1.366	95.966	0	671	76.998	81.411	0.763	131.07	25239	1.69	0.592	0.913	1.1979		1009	CEP170_KAN618-6_2.tif:0001-0198	1.2	76	0	264	29.212	14.245	0.708	91.171	17556	1.828	0.547	0.845
1000	CEP83_KAN618-6_2.tif:0001-0198	1.2	85.797	0	412	29.212	14.245	0.708	102.923	19819	1.828	0.547	0.845	0.940657		1010	CEP170_KAN618-6_2.tif:0002-0213	1.065	60.829	0	260	76.25	15.378	0.794	64.759	12470	1.661	0.602	0.917
1001	CEP83_KAN618-6_2.tif:0002-0213	1.065	107.161	0	522	76.25	15.378	0.794	114.083	21968	1.661	0.602	0.917	1.04265		1011	CEP170_KAN618-6_2.tif:0003-0377	0.571	95.573	0	218	25.755	27.167	0.769	54.596	10513	1.452	0.689	0.843
1002	CEP83_KAN618-6_2.tif:0003-0377	0.571	69.736	0	197	25.755	27.167	0.769	39.837	7671	1.452	0.689	0.843	0.364084		1012	CEP170_KAN618-6_2.tif:0004-0400	0.597	60.617	0	169	86.431	28.838	0.77	36.201	6971	1.314	0.761	0.888
1003	CEP83_KAN618-6_2.tif:0004-0400	0.597	149.113	0	534	86.431	28.838	0.77	89.052	17148	1.314	0.761	0.888	0.813885		1013	CEP170_KAN618-6_2.tif:0005-0584	0.628	53.711	0	162	25.505	42.153	0.772	33.75	6499	1.455	0.687	0.864
1004	CEP83_KAN618-6_2.tif:0005-0584	0.628	133.702	0	536	25.505	42.153	0.772	84.015	16178	1.455	0.687	0.864	0.767847		1014	CEP170_KAN618-6_2.tif:0006-0818	1.049	101.876	0	334	56.035	58.971	0.833	106.87	20579	1.366	0.732	0.924
1005	CEP83_KAN618-6_2.tif:0006-0818	1.049	135.193	0	895	56.035	58.971	0.833	141.82	27309	1.366	0.732	0.924	1.29615		1015	CEP170_KAN618-6_2.tif:0007-0850	0.821	92.323	0	301	76.576	61.255	0.848	75.752	14587	1.279	0.782	0.919
1006	CEP83_KAN618-6_2.tif:0007-0850	0.821	136.228	0	653	76.576	61.255	0.848	111.777	21524	1.279	0.782	0.919	1.02158		1016	CEP170_KAN618-6_2.tif:0008-0931	0.857	121.691	0	320	19.678	67.128	0.898	104.273	20079	1.482	0.675	0.932
1007	CEP83_KAN618-6_2.tif:0008-0931	0.857	70.842	0	244	19.678	67.128	0.898	60.703	11689	1.482	0.675	0.932	0.554788		1017	CEP170_KAN618-6_2.tif:0009-1124	1.314	66.043	0	285	86.546	81.064	0.769	86.772	16709	1.626	0.615	0.872
1008	CEP83_KAN618-6_2.tif:0009-1124	1.314	140.249	0	1024	86.546	81.064	0.769	184.268	35483	1.626	0.615	0.872	1.68411		1023	CEP170_KAN618-6_3.tif:0001-0227	1.267	61.107	0	303	83.103	16.397	0.716	77.43	14910	1.71	0.585	0.852
1018	CEP83_KAN618-6_3.tif:0001-0227	1.267	113.717	0	565	83.103	16.397	0.716	144.094	27747	1.71	0.585	0.852	1.31694		1024	CEP170_KAN618-6_3.tif:0002-0313	1.615	62.585	0	313	83.23	22.629	0.657	101.079	19464	2.315	0.432	0.845
1019	CEP83_KAN618-6_3.tif:0002-0313	1.615	84.926	0	576	83.23	22.629	0.657	137.161	26412	2.315	0.432	0.845	1.25358		1025	CEP170_KAN618-6_3.tif:0003-0322	0.701	106.719	0	264	4.389	23.281	0.788	74.818	14407	1.684	0.594	0.9
1020	CEP83_KAN618-6_3.tif:0003-0322	0.701	26.452	0	129	4.389	23.281	0.788	18.545	3571	1.684	0.594	0.9	0.169488		1026	CEP170_KAN618-6_3.tif:0004-0362	0.81	91.468	0	285	38.775	26.08	0.898	74.101	14269	1.204	0.831	0.969
1021	CEP83_KAN618-6_3.tif:0004-0362	0.81	169.263	0	858	38.775	26.08	0.898	137.125	26405	1.204	0.831	0.969	1.25324		1027	CEP170_KAN618-6_3.tif:0005-0701	0.831	40.281	0	202	38.384	50.514	0.74	33.47	6445	2.186	0.457	0.92
1022	CEP83_KAN618-6_3.tif:0005-0701	0.831	89.356	0	379	38.384	50.514	0.74	74.246	14297	2.186	0.457	0.92	0.67857		1034	CEP170_KAN618-6_4.tif:0001-0102	1.21	101.549	0	383	36.139	7.374	0.806	122.875	23661	1.348	0.742	0.888
1028	CEP83_KAN618-6_4.tif:0001-0102	1.21	87.052	0	601	36.139	7.374	0.806	105.333	20283	1.348	0.742	0.888	0.96268		1035	CEP170_KAN618-6_4.tif:0002-0231	0.893	107.012	0	404	79.759	16.651	0.872	95.585	18406	1.326	0.754	0.935
1029	CEP83_KAN618-6_4.tif:0002-0231	0.893	130.663	0	651	79.759	16.651	0.872	116.711	22474	1.326	0.754	0.935	1.06667		1036	CEP170_KAN618-6_4.tif:0003-0271	0.582	116.991	0	304	46.608	19.568	0.955	68.046	13103	1.088	0.919	0.941
1030	CEP83_KAN618-6_4.tif:0003-0271	0.582	28.188	0	105	46.608	19.568	0.955	16.395	3157	1.088	0.919	0.941	0.149839		1037	CEP170_KAN618-6_4.tif:0004-0607	1.267	66.012	0	272	18.543	43.805	0.818	83.646	16107	1.551	0.645	0.916
1031	CEP83_KAN618-6_4.tif:0004-0607	1.267	84.529	0	567	18.543	43.805	0.818	107.109	20625	1.551	0.645	0.916	0.978912		1038	CEP170_KAN618-6_4.tif:0005-0728	1.459	67.395	0	286	76.245	52.48	0.75	98.348	18938	2.086	0.479	0.921
1032	CEP83_KAN618-6_4.tif:0005-0728	1.459	99.434	0	646	76.245	52.48	0.75	145.102	27941	2.086	0.479	0.921	1.32615		1039	CEP170_KAN618-6_4.tif:0006-1151	1.262	72.885	0	334	27.745	83.024	0.75	91.976	17711	1.732	0.577	0.89
1033	CEP83_KAN618-6_4.tif:0006-1151	1.262	63.757	0	478	27.745	83.024	0.75	80.457	15493	1.732	0.577	0.89	0.735335		1046	CEP170_KAN618-6_5.tif:0001-0206	0.961	101.978	0	430	19.571	14.872	0.839	97.974	18866	1.591	0.628	0.918
1040	CEP83_KAN618-6_5.tif:0001-0206	0.961	156.141	0	646	19.571	14.872	0.839	150.009	28886	1.591	0.628	0.918	1.371		1047	CEP170_KAN618-6_5.tif:0002-0652	0.732	144.844	0	379	66.035	46.984	0.909	106.06	20423	1.175	0.851	0.956
1041	CEP83_KAN618-6_5.tif:0002-0652	0.732	79.979	0	303	66.035	46.984	0.909	58.563	11277	1.175	0.851	0.956	0.535234		1048	CEP170_KAN618-6_5.tif:0003-0723	1.293	72.104	0	314	38.19	52.16	0.73	93.238	17954	1.811	0.552	0.871
1042	CEP83_KAN618-6_5.tif:0003-0723	1.293	97.498	0	713	38.19	52.16	0.73	126.074	24277	1.811	0.552	0.871	1.15224		1049	CEP170_KAN618-6_5.tif:0004-0790	0.774	98.081	0	245	5.931	56.982	0.902	75.893	14614	1.123	0.891	0.946
1043	CEP83_KAN618-6_5.tif:0004-0790	0.774	177.933	0	805	5.931	56.982	0.902	137.681	26512	1.123	0.891	0.946	1.25832		1050	CEP170_KAN618-6_5.tif:0005-0816	1.163	103.299	0	400	90.233	58.81	0.86	120.164	23139	1.231	0.813	0.924
1044	CEP83_KAN618-6_5.tif:0005-0816	1.163	146.438	0	914	90.233	58.81	0.86	170.346	32802	1.231	0.813	0.924	1.55686		1051	CEP170_KAN618-6_5.tif:0006-0858	0.696	103.828	0	306	72.687	61.842	0.815	72.252	13913	1.651	0.606	0.882
1045	CEP83_KAN618-6_5.tif:0006-0858	0.696	32.537	0	167	72.687	61.842	0.815	22.642	4360	1.651	0.606	0.882	0.206936		1058	CEP170_KAN618-6_6.tif:0001-0074	1.018	82.005	0	306	9.855	5.42	0.808	83.469	16073	1.288	0.777	0.907
1052	CEP83_KAN618-6_6.tif:0001-0074	1.018	83.357	0	408	9.855	5.42	0.808	84.846	16338	1.288	0.777	0.907	0.775441		1059	CEP170_KAN618-6_6.tif:0002-0302	1.049	68.292	0	222	75.528	21.831	0.843	71.639	13795	1.413	0.708	0.896
1053	CEP83_KAN618-6_6.tif:0002-0302	1.049	118.49	0	640	75.528	21.831	0.843	124.298	23935	1.413	0.708	0.896	1.13601		1060	CEP170_KAN618-6_6.tif:0003-0607	0.872	99.036	0	401	83.091	43.82	0.824	86.404	16638	1.158	0.863	0.894
1054	CEP83_KAN618-6_6.tif:0003-0607	0.872	168.917	0	710	83.091	43.82	0.824	147.371	28378	1.158	0.863	0.894	1.34689		1061	CEP170_KAN618-6_6.tif:0004-0769	1.117	94.595	0	381	25.185	55.359	0.786	105.618	20338	1.505	0.665	0.892
1055	CEP83_KAN618-6_6.tif:0004-0769	1.117	99.484	0	483	25.185	55.359	0.786	111.076	21389	1.505	0.665	0.892	1.01517		1062	CEP170_KAN618-6_6.tif:0005-0814	1.418	90.498	0	414	62.61	58.656	0.846	128.302	24706	1.433	0.698	0.91
1056	CEP83_KAN618-6_6.tif:0005-0814	1.418	135.637	0	1071	62.61	58.656	0.846	192.297	37029	1.433	0.698	0.91	1.75749		1063	CEP170_KAN618-6_6.tif:0006-1101	1.013	48.908	0	273	27.599	79.373	0.699	49.527	9537	1.832	0.546	0.833
1057	CEP83_KAN618-6_6.tif:0006-1101	1.013	103.323	0	604	27.599	79.373	0.699	104.632	20148	1.832	0.546	0.833	0.956273		1069	CEP170_KAN618-7_1.tif:0001-0184	0.914	49.017	0	186	70.575	13.3	0.806	44.801	8627	1.184	0.844	0.896
									AVERAGE	21023.5				0.997825
									S.E.M.	1287.85
1064	CEP83_KAN618-7_1.tif:0001-0184	0.914	151.892	0	748	70.575	13.3	0.806	138.828	26733	1.184	0.844	0.896	1.26881		1070	CEP170_KAN618-7_1.tif:0002-0194	0.623	122.292	0	358	46.988	13.957	0.952	76.209	14675	1.131	0.884	0.934
1065	CEP83_KAN618-7_1.tif:0002-0194	0.623	50.633	0	240	46.988	13.957	0.952	31.554	6076	1.131	0.884	0.934	0.288382		1071	CEP170_KAN618-7_1.tif:0003-0314	0.597	78.713	0	267	48.849	22.673	0.952	47.008	9052	1.332	0.75	0.958
1066	CEP83_KAN618-7_1.tif:0003-0314	0.597	146.278	0	512	48.849	22.673	0.952	87.359	16822	1.332	0.75	0.958	0.798413		1072	CEP170_KAN618-7_1.tif:0004-0528	0.883	107.859	0	382	84.627	38.114	0.882	95.222	18336	1.234	0.811	0.919
1067	CEP83_KAN618-7_1.tif:0004-0528	0.883	113.947	0	582	84.627	38.114	0.882	100.596	19371	1.234	0.811	0.919	0.919394		1073	CEP170_KAN618-7_1.tif:0005-0912	0.867	56.533	0	248	23.247	65.696	0.79	49.028	9441	1.59	0.629	0.908
1068	CEP83_KAN618-7_1.tif:0005-0912	0.867	140.066	0	736	23.247	65.696	0.79	121.473	23391	1.59	0.629	0.908	1.11019		1083	CEP170_KAN618-7_2.tif:0001-0077	0.561	43.722	0	150	29.447	5.573	0.697	24.522	4722	1.785	0.56	0.85
1074	CEP83_KAN618-7_2.tif:0001-0077	0.561	141.389	0	443	29.447	5.573	0.697	79.299	15270	1.785	0.56	0.85	0.724751		1084	CEP170_KAN618-7_2.tif:0002-0313	1.246	97.537	0	341	37.5	22.653	0.777	121.566	23409	1.727	0.579	0.904
1075	CEP83_KAN618-7_2.tif:0002-0313	1.246	96.421	0	572	37.5	22.653	0.777	120.175	23141	1.727	0.579	0.904	1.09833		1085	CEP170_KAN618-7_2.tif:0003-0318	1.065	73.059	0	316	67.111	22.972	0.706	77.778	14977	1.824	0.548	0.867
1076	CEP83_KAN618-7_2.tif:0003-0318	1.065	78.605	0	426	67.111	22.972	0.706	83.682	16114	1.824	0.548	0.867	0.764809		1086	CEP170_KAN618-7_2.tif:0004-0496	1.158	54.26	0	231	44.71	35.731	0.688	62.837	12100	2.105	0.475	0.863
1077	CEP83_KAN618-7_2.tif:0004-0496	1.158	91.933	0	601	44.71	35.731	0.688	106.465	20501	2.105	0.475	0.863	0.973027		1087	CEP170_KAN618-7_2.tif:0005-0610	0.519	91.83	1	230	24.538	43.95	0.758	47.689	9183	2.143	0.467	0.913
1078	CEP83_KAN618-7_2.tif:0005-0610	0.519	13.94	0	77	24.538	43.95	0.758	7.239	1394	2.143	0.467	0.913	0.0661626		1088	CEP170_KAN618-7_2.tif:0006-0651	0.753	128.317	0	361	49.393	46.977	0.817	96.624	18606	1.617	0.618	0.915
1079	CEP83_KAN618-7_2.tif:0006-0651	0.753	20.048	0	127	49.393	46.977	0.817	15.096	2907	1.617	0.618	0.915	0.137973		1089	CEP170_KAN618-7_2.tif:0007-0715	0.857	109.448	0	476	8.412	51.548	0.865	93.783	18059	1.43	0.7	0.935
1080	CEP83_KAN618-7_2.tif:0007-0715	0.857	124	0	617	8.412	51.548	0.865	106.252	20460	1.43	0.7	0.935	0.971081		1090	CEP170_KAN618-7_2.tif:0008-0871	1.511	64.763	0	349	87.761	62.788	0.758	97.87	18846	1.717	0.582	0.9
1081	CEP83_KAN618-7_2.tif:0008-0871	1.511	101.33	0	766	87.761	62.788	0.758	153.13	29487	1.717	0.582	0.9	1.39952		1091	CEP170_KAN618-7_2.tif:0009-1001	1.579	86.671	0	374	73.416	72.115	0.786	136.829	26348	1.45	0.689	0.877
1082	CEP83_KAN618-7_2.tif:0009-1001	1.579	68.464	0	532	73.416	72.115	0.786	108.085	20813	1.45	0.689	0.877	0.987835		6	CEP170_KAN618-7_3.tif:0001-0104	1.698	77.453	0	548	31.779	7.522	0.713	131.527	25327	2.107	0.475	0.872
1	CEP83_KAN618-7_3.tif:0001-0104	1.698	118.685	0	1019	31.779	7.522	0.713	201.546	38810	2.107	0.475	0.872	1.84202		7	CEP170_KAN618-7_3.tif:0002-0177	1.148	78.819	0	457	76.05	12.756	0.735	90.459	17419	1.927	0.519	0.884
2	CEP83_KAN618-7_3.tif:0002-0177	1.148	113.462	0	855	76.05	12.756	0.735	130.218	25075	1.927	0.519	0.884	1.19012		8	CEP170_KAN618-7_3.tif:0003-0287	1.392	63.265	0	324	42.617	20.742	0.72	88.05	16955	1.553	0.644	0.873
3	CEP83_KAN618-7_3.tif:0003-0287	1.392	85.754	0	531	42.617	20.742	0.72	119.349	22982	1.553	0.644	0.873	1.09078		9	CEP170_KAN618-7_3.tif:0004-0917	1.314	83.585	0	370	73.695	66.042	0.706	109.819	21147	1.919	0.521	0.871
4	CEP83_KAN618-7_3.tif:0004-0917	1.314	113.87	0	809	73.695	66.042	0.706	149.609	28809	1.919	0.521	0.871	1.36734		10	CEP170_KAN618-7_3.tif:0005-1067	0.81	140.59	0	478	20.399	76.875	0.925	113.896	21932	1.205	0.83	0.926
5	CEP83_KAN618-7_3.tif:0005-1067	0.81	15.622	0	92	20.399	76.875	0.925	12.656	2437	1.205	0.83	0.926	0.115666		17	CEP170_KAN618-7_4.tif:0001-0193	0.846	59.215	0	249	59.313	13.908	0.74	50.124	9652	1.823	0.549	0.849
11	CEP83_KAN618-7_4.tif:0001-0193	0.846	125.613	0	448	59.313	13.908	0.74	106.33	20475	1.823	0.549	0.849	0.971793		18	CEP170_KAN618-7_4.tif:0002-0317	0.711	116.92	0	306	17.605	22.832	0.897	83.184	16018	1.04	0.962	0.926
12	CEP83_KAN618-7_4.tif:0002-0317	0.711	48.613	0	235	17.605	22.832	0.897	34.586	6660	1.04	0.962	0.926	0.3161		19	CEP170_KAN618-7_4.tif:0003-0559	0.535	55.796	0	198	42.963	40.305	0.837	29.845	5747	1.799	0.556	0.958
13	CEP83_KAN618-7_4.tif:0003-0559	0.535	108.495	0	376	42.963	40.305	0.837	58.033	11175	1.799	0.556	0.958	0.530392		20	CEP170_KAN618-7_4.tif:0004-0783	0.753	53.621	0	174	81.812	56.424	0.725	40.377	7775	2.297	0.435	0.942
14	CEP83_KAN618-7_4.tif:0004-0783	0.753	99.89	0	315	81.812	56.424	0.725	75.218	14484	2.297	0.435	0.942	0.687446		21	CEP170_KAN618-7_4.tif:0005-0864	1.231	90.949	0	254	59.855	62.286	0.708	111.938	21555	1.834	0.545	0.883
15	CEP83_KAN618-7_4.tif:0005-0864	1.231	110.43	0	738	59.855	62.286	0.708	135.915	26172	1.834	0.545	0.883	1.24219		22	CEP170_KAN618-7_4.tif:0006-1051	0.68	71.298	0	227	38.2	75.766	0.969	48.504	9340	1.099	0.91	0.949
16	CEP83_KAN618-7_4.tif:0006-1051	0.68	128.26	0	461	38.2	75.766	0.969	87.255	16802	1.099	0.91	0.949	0.797463		27	CEP170_KAN618-7_5.tif:0001-0047	0.545	103.038	0	265	64.99	3.421	0.891	56.185	10819	1.323	0.756	0.986
23	CEP83_KAN618-7_5.tif:0001-0047	0.545	18.267	0	90	64.99	3.421	0.891	9.96	1918	1.323	0.756	0.986	0.0910329		28	CEP170_KAN618-7_5.tif:0002-0647	1.537	50.767	0	237	55.332	46.671	0.722	78.037	15027	2.17	0.461	0.934
24	CEP83_KAN618-7_5.tif:0002-0647	1.537	83.419	0	761	55.332	46.671	0.722	128.229	24692	2.17	0.461	0.934	1.17194		29	CEP170_KAN618-7_5.tif:0003-0690	1.319	80.327	0	392	78.945	49.684	0.689	105.956	20403	2.296	0.435	0.88
25	CEP83_KAN618-7_5.tif:0003-0690	1.319	89.201	0	574	78.945	49.684	0.689	117.661	22657	2.296	0.435	0.88	1.07536		30	CEP170_KAN618-7_5.tif:0004-1112	0.919	85.977	0	244	70.662	80.143	0.762	79.029	15218	1.564	0.639	0.898
26	CEP83_KAN618-7_5.tif:0004-1112	0.919	103.288	0	500	70.662	80.143	0.762	94.941	18282	1.564	0.639	0.898	0.867708		40	CEP170_KAN618-7_6.tif:0001-0033	0.779	71.3	0	309	29.78	2.453	0.854	55.541	10695	1.303	0.767	0.932
31	CEP83_KAN618-7_6.tif:0001-0033	0.779	103.727	0	404	29.78	2.453	0.854	80.8	15559	1.303	0.767	0.932	0.738468		41	CEP170_KAN618-7_6.tif:0002-0292	0.95	80.661	0	265	90.465	21.086	0.857	76.656	14761	1.135	0.881	0.938
32	CEP83_KAN618-7_6.tif:0002-0292	0.95	72.858	0	441	90.465	21.086	0.857	69.24	13333	1.135	0.881	0.938	0.632816		42	CEP170_KAN618-7_6.tif:0003-0310	0.914	69.307	0	243	46.233	22.342	0.788	63.346	12198	1.915	0.522	0.926
33	CEP83_KAN618-7_6.tif:0003-0310	0.914	78.21	0	339	46.233	22.342	0.788	71.484	13765	1.915	0.522	0.926	0.65332		43	CEP170_KAN618-7_6.tif:0004-0430	0.717	62.775	0	214	63.272	31.02	0.857	44.988	8663	1.199	0.834	0.932
34	CEP83_KAN618-7_6.tif:0004-0430	0.717	117.022	0	429	63.272	31.02	0.857	83.864	16149	1.199	0.834	0.932	0.76647		44	CEP170_KAN618-7_6.tif:0005-0472	0.872	68.095	0	207	32.013	33.965	0.777	59.41	11440	1.422	0.703	0.908
35	CEP83_KAN618-7_6.tif:0005-0472	0.872	113.738	0	583	32.013	33.965	0.777	99.231	19108	1.422	0.703	0.908	0.906912		45	CEP170_KAN618-7_6.tif:0006-0572	0.545	101.524	0	235	80.431	41.22	0.869	55.359	10660	1.136	0.881	0.909
36	CEP83_KAN618-7_6.tif:0006-0572	0.545	54.533	0	159	80.431	41.22	0.869	29.736	5726	1.136	0.881	0.909	0.27177		46	CEP170_KAN618-7_6.tif:0007-0766	0.789	59.941	0	189	15.894	55.25	0.703	47.315	9111	1.376	0.727	0.842
37	CEP83_KAN618-7_6.tif:0007-0766	0.789	97.638	0	503	15.894	55.25	0.703	77.071	14841	1.376	0.727	0.842	0.70439		47	CEP170_KAN618-7_6.tif:0008-0971	0.649	109.024	0	317	38.086	69.928	0.837	70.772	13628	1.236	0.809	0.936
38	CEP83_KAN618-7_6.tif:0008-0971	0.649	89.68	0	298	38.086	69.928	0.837	58.215	11210	1.236	0.809	0.936	0.532054		48	CEP170_KAN618-7_6.tif:0009-1176	0.675	80.015	0	284	69.458	84.752	0.92	54.019	10402	1.141	0.876	0.963
39	CEP83_KAN618-7_6.tif:0009-1176	0.675	159.538	0	497	69.458	84.752	0.92	107.706	20740	1.141	0.876	0.963	0.98437		52	CEP170_KAN618-8_1.tif:0001-0330	0.743	118.58	0	306	75.765	23.795	0.823	88.06	16957	1.686	0.593	0.953
									AVERAGE	17219.5				0.817279
49	CEP83_KAN618-8_1.tif:0001-0330	0.743	23.462	0	113	75.765	23.795	0.823	17.423	3355	1.686	0.593	0.953	0.159236		53	CEP170_KAN618-8_1.tif:0002-0660	0.545	99.924	0	299	39.749	47.567	0.896	54.486	10492	1.425	0.702	0.917
50	CEP83_KAN618-8_1.tif:0002-0660	0.545	28.352	0	119	39.749	47.567	0.896	15.46	2977	1.425	0.702	0.917	0.141296		54	CEP170_KAN618-8_1.tif:0003-0938	0.706	107.853	0	228	81.676	67.599	0.706	76.173	14668	2.15	0.465	0.889
51	CEP83_KAN618-8_1.tif:0003-0938	0.706	15.051	0	79	81.676	67.599	0.706	10.63	2047	2.15	0.465	0.889	0.0971555		61	CEP170_KAN618-8_2.tif:0001-0038	0.763	121.497	0	302	18.065	2.751	0.894	92.75	17860	1.233	0.811	0.888
55	CEP83_KAN618-8_2.tif:0001-0038	0.763	36.048	0	120	18.065	2.751	0.894	27.518	5299	1.233	0.811	0.888	0.251503		62	CEP170_KAN618-8_2.tif:0002-0231	0.711	114.876	0	325	68.824	16.693	0.932	81.73	15738	1.249	0.801	0.955
56	CEP83_KAN618-8_2.tif:0002-0231	0.711	31.62	0	95	68.824	16.693	0.932	22.497	4332	1.249	0.801	0.955	0.205607		63	CEP170_KAN618-8_2.tif:0003-0545	0.649	110.168	0	284	4.987	39.265	0.91	71.515	13771	1.418	0.705	0.958
57	CEP83_KAN618-8_2.tif:0003-0545	0.649	24.008	0	83	4.987	39.265	0.91	15.585	3001	1.418	0.705	0.958	0.142435		64	CEP170_KAN618-8_2.tif:0004-0792	0.867	117.114	0	332	73.769	57.085	0.919	101.568	19558	1.153	0.867	0.946
58	CEP83_KAN618-8_2.tif:0004-0792	0.867	42.419	0	158	73.769	57.085	0.919	36.788	7084	1.153	0.867	0.946	0.336224		65	CEP170_KAN618-8_2.tif:0005-1052	0.587	109.168	0	306	53.367	75.839	0.881	64.063	12336	1.177	0.849	0.93
59	CEP83_KAN618-8_2.tif:0005-1052	0.587	44.611	0	130	53.367	75.839	0.881	26.179	5041	1.177	0.849	0.93	0.239258		66	CEP170_KAN618-8_2.tif:0006-1271	0.649	113.408	0	277	85.807	91.62	0.899	73.618	14176	1.403	0.713	0.916
60	CEP83_KAN618-8_2.tif:0006-1271	0.649	43.296	0	168	85.807	91.62	0.899	28.105	5412	1.403	0.713	0.916	0.256867		74	CEP170_KAN618-8_3.tif:0001-0087	0.774	117.067	0	306	42.065	6.312	0.87	90.584	17443	1.203	0.831	0.94
67	CEP83_KAN618-8_3.tif:0001-0087	0.774	39.356	0	146	42.065	6.312	0.87	30.453	5864	1.203	0.831	0.94	0.27832		75	CEP170_KAN618-8_3.tif:0002-0310	0.696	101.381	0	317	88.476	22.376	0.811	70.549	13585	1.982	0.505	0.947
68	CEP83_KAN618-8_3.tif:0002-0310	0.696	26.918	0	120	88.476	22.376	0.811	18.732	3607	1.982	0.505	0.947	0.171197		76	CEP170_KAN618-8_3.tif:0003-0374	0.623	102.433	0	226	47.235	26.934	0.849	63.834	12292	1.248	0.801	0.938
69	CEP83_KAN618-8_3.tif:0003-0374	0.623	34.2	0	162	47.235	26.934	0.849	21.313	4104	1.248	0.801	0.938	0.194786		77	CEP170_KAN618-8_3.tif:0004-0521	0.696	117.358	0	305	74.862	37.54	0.833	81.667	15726	1.421	0.704	0.924
70	CEP83_KAN618-8_3.tif:0004-0521	0.696	43.224	0	180	74.862	37.54	0.833	30.079	5792	1.421	0.704	0.924	0.274902		78	CEP170_KAN618-8_3.tif:0005-0640	0.675	121.131	0	319	43.71	46.135	0.885	81.776	15747	1.373	0.728	0.952
71	CEP83_KAN618-8_3.tif:0005-0640	0.675	14.738	0	53	43.71	46.135	0.885	9.95	1916	1.373	0.728	0.952	0.090938		79	CEP170_KAN618-8_3.tif:0006-0721	0.758	116.849	0	380	75.608	52.035	0.853	88.595	17060	1.218	0.821	0.91
72	CEP83_KAN618-8_3.tif:0006-0721	0.758	58.911	0	229	75.608	52.035	0.853	44.666	8601	1.218	0.821	0.91	0.408224		80	CEP170_KAN618-8_3.tif:0007-0833	0.571	90.882	0	184	16.882	60.033	0.778	51.916	9997	1.281	0.781	0.884
73	CEP83_KAN618-8_3.tif:0007-0833	0.571	33.3	0	101	16.882	60.033	0.778	19.022	3663	1.281	0.781	0.884	0.173855		84	CEP170_KAN618-8_4.tif:0001-0247	0.805	110.806	0	290	47.475	17.844	0.804	89.192	17175	1.16	0.862	0.878
81	CEP83_KAN618-8_4.tif:0001-0247	0.805	44.116	0	212	47.475	17.844	0.804	35.511	6838	1.16	0.862	0.878	0.324548		85	CEP170_KAN618-8_4.tif:0002-0556	0.821	117.886	0	322	70.724	40.079	0.848	96.728	18626	1.209	0.827	0.916
82	CEP83_KAN618-8_4.tif:0002-0556	0.821	42.253	0	150	70.724	40.079	0.848	34.669	6676	1.209	0.827	0.916	0.316859		86	CEP170_KAN618-8_4.tif:0003-0777	1.091	140.871	0	449	75.483	56.01	0.799	153.629	29583	1.152	0.868	0.879
83	CEP83_KAN618-8_4.tif:0003-0777	1.091	35.671	0	171	75.483	56.01	0.799	38.902	7491	1.152	0.868	0.879	0.355541		92	CEP170_KAN618-8_5.tif:0001-0298	0.608	118.026	0	280	63.512	21.481	0.851	71.712	13809	1.314	0.761	0.918
87	CEP83_KAN618-8_5.tif:0001-0298	0.608	50.214	0	161	63.512	21.481	0.851	30.51	5875	1.314	0.761	0.918	0.278842		93	CEP170_KAN618-8_5.tif:0002-0608	0.743	89.224	0	182	65.449	43.847	0.787	66.259	12759	1.254	0.798	0.861
88	CEP83_KAN618-8_5.tif:0002-0608	0.743	40.895	0	141	65.449	43.847	0.787	30.37	5848	1.254	0.798	0.861	0.27756		94	CEP170_KAN618-8_5.tif:0003-0841	0.587	101.823	0	368	68.204	60.633	0.923	59.752	11506	1.408	0.71	0.93
89	CEP83_KAN618-8_5.tif:0003-0841	0.587	35.097	0	150	68.204	60.633	0.923	20.596	3966	1.408	0.71	0.93	0.188236		95	CEP170_KAN618-8_5.tif:0004-0871	0.582	92.304	0	216	34.868	62.81	0.762	53.687	10338	1.629	0.614	0.882
90	CEP83_KAN618-8_5.tif:0004-0871	0.582	29.554	0	95	34.868	62.81	0.762	17.189	3310	1.629	0.614	0.882	0.157101		96	CEP170_KAN618-8_5.tif:0005-1240	0.587	104.788	0	272	48.414	89.342	0.908	61.492	11841	1.162	0.861	0.942
91	CEP83_KAN618-8_5.tif:0005-1240	0.587	26.92	0	99	48.414	89.342	0.908	15.798	3042	1.162	0.861	0.942	0.144381		101	CEP170_KAN618-8_6.tif:0001-0075	0.602	119.974	0	327	89.928	5.405	0.96	72.273	13917	1.08	0.926	0.955
97	CEP83_KAN618-8_6.tif:0001-0075	0.602	43.716	0	144	89.928	5.405	0.96	26.334	5071	1.08	0.926	0.955	0.240682		102	CEP170_KAN618-8_6.tif:0002-0277	0.748	125.306	0	394	48.569	19.971	0.919	93.705	18044	1.318	0.759	0.95
98	CEP83_KAN618-8_6.tif:0002-0277	0.748	24.625	0	133	48.569	19.971	0.919	18.415	3546	1.318	0.759	0.95	0.168302		103	CEP170_KAN618-8_6.tif:0003-0570	0.691	140.203	0	438	79.55	41.1	0.871	96.837	18647	1.433	0.698	0.927
99	CEP83_KAN618-8_6.tif:0003-0570	0.691	32.023	0	116	79.55	41.1	0.871	22.118	4259	1.433	0.698	0.927	0.202142		104	CEP170_KAN618-8_6.tif:0004-0926	0.608	98.744	0	233	50.774	66.782	0.842	59.996	11553	1.284	0.779	0.88
100	CEP83_KAN618-8_6.tif:0004-0926	0.608	26.761	0	140	50.774	66.782	0.842	16.26	3131	1.284	0.779	0.88	0.148605		110	CEP170_KAN618-9_1.tif:0001-0013	0.561	58.463	0	212	71.623	0.921	0.894	32.79	6314	1.552	0.644	0.939
										4683.86				0.222307
105	CEP83_KAN618-9_1.tif:0001-0013	0.561	122.694	0	411	71.623	0.921	0.894	68.814	13251	1.552	0.644	0.939	0.628924		111	CEP170_KAN618-9_1.tif:0002-0357	0.623	102.392	0	267	65.108	25.747	0.888	63.808	12287	1.203	0.831	0.899
106	CEP83_KAN618-9_1.tif:0002-0357	0.623	74.083	0	249	65.108	25.747	0.888	46.167	8890	1.203	0.831	0.899	0.421941		112	CEP170_KAN618-9_1.tif:0003-0414	1.059	71.054	0	293	75.62	29.828	0.679	75.275	14495	1.558	0.642	0.816
107	CEP83_KAN618-9_1.tif:0003-0414	1.059	89.093	0	419	75.62	29.828	0.679	94.385	18175	1.558	0.642	0.816	0.862629		113	CEP170_KAN618-9_1.tif:0004-0543	0.618	115.21	0	287	78.968	39.134	0.891	71.198	13710	1.065	0.939	0.915
108	CEP83_KAN618-9_1.tif:0004-0543	0.618	61.353	0	215	78.968	39.134	0.891	37.915	7301	1.065	0.939	0.915	0.346523		114	CEP170_KAN618-9_1.tif:0005-1066	0.737	107.923	0	217	81.671	76.822	0.956	79.585	15325	1.083	0.923	0.944
109	CEP83_KAN618-9_1.tif:0005-1066	0.737	39.077	0	222	81.671	76.822	0.956	28.817	5549	1.083	0.923	0.944	0.263369		124	CEP170_KAN618-9_2.tif:0001-0289	0.613	54.661	0	174	72.97	20.831	0.883	33.496	6450	1.264	0.791	0.925
115	CEP83_KAN618-9_2.tif:0001-0289	0.613	99.864	0	416	72.97	20.831	0.883	61.196	11784	1.264	0.791	0.925	0.559297		125	CEP170_KAN618-9_2.tif:0002-0315	0.795	103.621	0	280	44.541	22.711	0.775	82.332	15854	1.492	0.67	0.872
116	CEP83_KAN618-9_2.tif:0002-0315	0.795	71.399	0	347	44.541	22.711	0.775	56.73	10924	1.492	0.67	0.872	0.518479		126	CEP170_KAN618-9_2.tif:0003-0524	0.898	102.624	0	254	28.147	37.773	0.701	92.199	17754	1.753	0.57	0.838
117	CEP83_KAN618-9_2.tif:0003-0524	0.898	44.566	0	185	28.147	37.773	0.701	40.039	7710	1.753	0.57	0.838	0.365935		127	CEP170_KAN618-9_2.tif:0004-0547	0.821	82.297	0	216	66.259	39.417	0.782	67.526	13003	1.701	0.588	0.895
118	CEP83_KAN618-9_2.tif:0004-0547	0.821	83.158	0	425	66.259	39.417	0.782	68.233	13139	1.701	0.588	0.895	0.623609		128	CEP170_KAN618-9_2.tif:0005-0657	0.8	82.26	0	245	45.436	47.349	0.827	65.787	12668	1.384	0.723	0.917
119	CEP83_KAN618-9_2.tif:0005-0657	0.8	76.539	0	332	45.436	47.349	0.827	61.212	11787	1.384	0.723	0.917	0.559439		129	CEP170_KAN618-9_2.tif:0006-0709	0.535	78.165	0	181	23.408	51.074	0.78	41.81	8051	1.346	0.743	0.892
120	CEP83_KAN618-9_2.tif:0006-0709	0.535	108.126	0	359	23.408	51.074	0.78	57.836	11137	1.346	0.743	0.892	0.528589		130	CEP170_KAN618-9_2.tif:0007-0774	1.117	114.679	0	345	72.816	55.769	0.835	128.042	24656	1.327	0.753	0.903
121	CEP83_KAN618-9_2.tif:0007-0774	1.117	53.116	0	318	72.816	55.769	0.835	59.306	11420	1.327	0.753	0.903	0.542021		131	CEP170_KAN618-9_2.tif:0008-0976	0.976	76.314	0	254	42.678	70.319	0.765	74.506	14347	1.422	0.703	0.885
122	CEP83_KAN618-9_2.tif:0008-0976	0.976	73.878	0	377	42.678	70.319	0.765	72.128	13889	1.422	0.703	0.885	0.659205		132	CEP170_KAN618-9_2.tif:0009-1025	0.576	88.667	0	231	72.076	73.876	0.902	51.111	9842	1.206	0.829	0.965
123	CEP83_KAN618-9_2.tif:0009-1025	0.576	110.396	0	354	72.076	73.876	0.902	63.637	12254	1.206	0.829	0.965	0.581604		141	CEP170_KAN618-9_3.tif:0001-0178	1.236	73.029	0	368	57.019	12.813	0.754	90.262	17381	1.975	0.506	0.939
133	CEP83_KAN618-9_3.tif:0001-0178	1.236	71.315	0	422	57.019	12.813	0.754	88.143	16973	1.975	0.506	0.939	0.805579		142	CEP170_KAN618-9_3.tif:0002-0196	0.639	103.813	0	238	18.27	14.187	0.837	66.311	12769	1.515	0.66	0.921
134	CEP83_KAN618-9_3.tif:0002-0196	0.639	44.748	0	200	18.27	14.187	0.837	28.583	5504	1.515	0.66	0.921	0.261233		143	CEP170_KAN618-9_3.tif:0003-0420	1.252	65.78	0	293	30.882	30.188	0.666	82.327	15853	1.591	0.629	0.817
135	CEP83_KAN618-9_3.tif:0003-0420	1.252	129.531	0	832	30.882	30.188	0.666	162.114	31217	1.591	0.629	0.817	1.48163		144	CEP170_KAN618-9_3.tif:0004-0447	1.117	87.074	0	420	8.507	32.212	0.756	97.221	18721	1.518	0.659	0.879
136	CEP83_KAN618-9_3.tif:0004-0447	1.117	87.051	0	344	8.507	32.212	0.756	97.195	18716	1.518	0.659	0.879	0.888306		145	CEP170_KAN618-9_3.tif:0005-0634	1.34	110.124	0	487	69.876	45.719	0.811	147.548	28412	1.651	0.606	0.93
137	CEP83_KAN618-9_3.tif:0005-0634	1.34	103.039	0	470	69.876	45.719	0.811	138.055	26584	1.651	0.606	0.93	1.26174		146	CEP170_KAN618-9_3.tif:0006-0797	1.122	78.958	0	293	46.09	57.388	0.716	88.569	17055	2.127	0.47	0.919
138	CEP83_KAN618-9_3.tif:0006-0797	1.122	69.699	0	410	46.09	57.388	0.716	78.183	15055	2.127	0.47	0.919	0.714547		147	CEP170_KAN618-9_3.tif:0007-1128	0.571	104.818	0	294	59.106	81.302	0.883	59.877	11530	1.503	0.665	0.94
139	CEP83_KAN618-9_3.tif:0007-1128	0.571	58.127	0	205	59.106	81.302	0.883	33.205	6394	1.503	0.665	0.94	0.303475		148	CEP170_KAN618-9_3.tif:0008-1269	1.278	80.309	0	366	2.813	91.513	0.768	102.596	19756	1.819	0.55	0.893
140	CEP83_KAN618-9_3.tif:0008-1269	1.278	87.813	0	536	2.813	91.513	0.768	112.182	21602	1.819	0.55	0.893	1.02528		156	CEP170_KAN618-9_4.tif:0001-0036	1.054	74.266	0	230	54.277	2.573	0.812	78.292	15076	1.507	0.664	0.902
149	CEP83_KAN618-9_4.tif:0001-0036	1.054	82.044	0	466	54.277	2.573	0.812	86.492	16655	1.507	0.664	0.902	0.790486		157	CEP170_KAN618-9_4.tif:0002-0163	1.252	67.896	0	257	68.464	11.697	0.766	84.975	16363	1.706	0.586	0.886
150	CEP83_KAN618-9_4.tif:0002-0163	1.252	83.88	0	478	68.464	11.697	0.766	104.979	20215	1.706	0.586	0.886	0.959453		158	CEP170_KAN618-9_4.tif:0003-0470	0.639	67.512	0	186	69.228	33.844	0.667	43.124	8304	2.168	0.461	0.854
151	CEP83_KAN618-9_4.tif:0003-0470	0.639	105.041	0	388	69.228	33.844	0.667	67.095	12920	2.168	0.461	0.854	0.613214		159	CEP170_KAN618-9_4.tif:0004-0732	0.696	65.888	0	179	0.922	52.834	0.709	45.85	8829	2.275	0.439	0.908
152	CEP83_KAN618-9_4.tif:0004-0732	0.696	75.933	0	251	0.922	52.834	0.709	52.84	10175	2.275	0.439	0.908	0.48293		160	CEP170_KAN618-9_4.tif:0005-0773	1.096	93.441	0	333	76.926	55.704	0.736	102.388	19716	1.756	0.569	0.863
153	CEP83_KAN618-9_4.tif:0005-0773	1.096	73.782	0	426	76.926	55.704	0.736	80.847	15568	1.756	0.569	0.863	0.738895		161	CEP170_KAN618-9_4.tif:0006-0839	0.54	96.308	5	209	1.793	60.458	0.835	52.015	10016	1.398	0.715	0.916
154	CEP83_KAN618-9_4.tif:0006-0839	0.54	31.26	0	134	1.793	60.458	0.835	16.883	3251	1.398	0.715	0.916	0.1543		162	CEP170_KAN618-9_4.tif:0007-1270	0.665	97.492	0	228	54.852	91.523	0.816	64.805	12479	1.439	0.695	0.88
155	CEP83_KAN618-9_4.tif:0007-1270	0.665	44.625	0	234	54.852	91.523	0.816	29.663	5712	1.439	0.695	0.88	0.271105		170	CEP170_KAN618-9_5.tif:0001-0277	0.571	39.145	0	174	60.65	19.961	0.8	22.362	4306	1.713	0.584	0.905
163	CEP83_KAN618-9_5.tif:0001-0277	0.571	108.327	0	390	60.65	19.961	0.8	61.882	11916	1.713	0.584	0.905	0.565562		171	CEP170_KAN618-9_5.tif:0002-0289	0.846	148.35	0	543	38.953	20.829	0.952	125.575	24181	1.19	0.84	0.962
164	CEP83_KAN618-9_5.tif:0002-0289	0.846	90.178	0	397	38.953	20.829	0.952	76.334	14699	1.19	0.84	0.962	0.69765		172	CEP170_KAN618-9_5.tif:0003-0333	0.717	67.051	0	218	90.694	24.052	0.756	48.052	9253	2.065	0.484	0.948
165	CEP83_KAN618-9_5.tif:0003-0333	0.717	84.993	0	374	90.694	24.052	0.756	60.91	11729	2.065	0.484	0.948	0.556687		173	CEP170_KAN618-9_5.tif:0004-0631	0.711	106.759	0	263	53.239	45.507	0.922	75.955	14626	1.025	0.975	0.919
166	CEP83_KAN618-9_5.tif:0004-0631	0.711	40.204	0	208	53.239	45.507	0.922	28.604	5508	1.025	0.975	0.919	0.261423		174	CEP170_KAN618-9_5.tif:0005-0754	0.821	130.31	0	494	31.989	54.292	0.869	106.922	20589	1.101	0.909	0.927
167	CEP83_KAN618-9_5.tif:0005-0754	0.821	29.082	0	202	31.989	54.292	0.869	23.863	4595	1.101	0.909	0.927	0.21809		175	CEP170_KAN618-9_5.tif:0006-0839	0.81	125.16	0	342	67.253	60.477	0.902	101.396	19525	1.242	0.805	0.934
168	CEP83_KAN618-9_5.tif:0006-0839	0.81	33.494	0	178	67.253	60.477	0.902	27.134	5225	1.242	0.805	0.934	0.247991		176	CEP170_KAN618-9_5.tif:0007-0977	1.272	83.833	0	330	48.621	70.359	0.672	106.662	20539	2.054	0.487	0.831
169	CEP83_KAN618-9_5.tif:0007-0977	1.272	65.514	0	457	48.621	70.359	0.672	83.355	16051	2.054	0.487	0.831	0.761819		182	CEP170_KAN618-9_6.tif:0001-0012	0.55	111.009	0	229	69.016	0.944	0.904	61.108	11767	1.14	0.878	0.918
177	CEP83_KAN618-9_6.tif:0001-0012	0.55	45.792	0	119	69.016	0.944	0.904	25.208	4854	1.14	0.878	0.918	0.230383		183	CEP170_KAN618-9_6.tif:0002-0034	1.044	102.91	0	413	40.342	2.455	0.72	107.42	20685	1.51	0.662	0.861
178	CEP83_KAN618-9_6.tif:0002-0034	1.044	67.502	0	421	40.342	2.455	0.72	70.461	13568	1.51	0.662	0.861	0.64397		184	CEP170_KAN618-9_6.tif:0003-0444	0.576	107.396	0	271	11.222	31.996	0.831	61.908	11921	1.447	0.691	0.892
179	CEP83_KAN618-9_6.tif:0003-0444	0.576	39.216	0	159	11.222	31.996	0.831	22.606	4353	1.447	0.691	0.892	0.206604		185	CEP170_KAN618-9_6.tif:0004-0571	0.841	105.698	0	288	75.818	41.19	0.861	88.922	17123	1.381	0.724	0.91
180	CEP83_KAN618-9_6.tif:0004-0571	0.841	116.679	0	631	75.818	41.19	0.861	98.161	18902	1.381	0.724	0.91	0.897134		186	CEP170_KAN618-9_6.tif:0005-0670	0.8	104.545	0	240	43.137	48.329	0.835	83.61	16100	1.504	0.665	0.948
181	CEP83_KAN618-9_6.tif:0005-0670	0.8	55.753	0	359	43.137	48.329	0.835	44.588	8586	1.504	0.665	0.948	0.407512
									AVERAGE	12286.3				0.583136
									S.E.M.	963.493
1	CEP83_KAN618-10_1.tif:0001-0171	0.639	107.854	0	436	71.202	12.32	0.87	68.892	13266	1.508	0.663	0.95	0.629636		8	CEP170_KAN618-10_1.tif:0001-0171	0.639	97.553	0	339	71.202	12.32	0.87	62.313	11999	1.508	0.663	0.95
2	CEP83_KAN618-10_1.tif:0002-0220	1.449	103.025	0	539	26.974	15.951	0.739	149.272	28744	1.886	0.53	0.903	1.36426		9	CEP170_KAN618-10_1.tif:0002-0220	1.449	114.624	0	528	26.974	15.951	0.739	166.077	31980	1.886	0.53	0.903
3	CEP83_KAN618-10_1.tif:0003-0551	0.815	98.745	0	444	90.932	39.722	0.864	80.509	15503	1.214	0.824	0.908	0.73581		10	CEP170_KAN618-10_1.tif:0003-0551	0.815	89.057	0	253	90.932	39.722	0.864	72.611	13982	1.214	0.824	0.908
4	CEP83_KAN618-10_1.tif:0004-0583	0.95	121.011	0	611	56.397	42.056	0.805	115.002	22145	1.798	0.556	0.899	1.05106		11	CEP170_KAN618-10_1.tif:0004-0583	0.95	80.06	0	288	56.397	42.056	0.805	76.085	14651	1.798	0.556	0.899
5	CEP83_KAN618-10_1.tif:0005-0591	0.81	114.224	0	464	78.819	42.602	0.902	92.537	17819	1.08	0.926	0.92	0.845733		12	CEP170_KAN618-10_1.tif:0005-0591	0.81	98.244	0	259	78.819	42.602	0.902	79.59	15326	1.08	0.926	0.92
6	CEP83_KAN618-10_1.tif:0006-0744	0.582	140.321	0	441	38.773	53.56	0.722	81.615	15716	1.495	0.669	0.845	0.745919		13	CEP170_KAN618-10_1.tif:0006-0744	0.582	61.018	0	180	38.773	53.56	0.722	35.49	6834	1.495	0.669	0.845
7	CEP83_KAN618-10_1.tif:0007-0868	0.883	121.647	0	592	14.72	62.588	0.87	107.394	20680	1.523	0.657	0.963	0.981523		14	CEP170_KAN618-10_1.tif:0007-0868	0.883	72.741	0	213	14.72	62.588	0.87	64.218	12366	1.523	0.657	0.963
15	CEP83_KAN618-10_2.tif:0001-0372	1.174	106.624	0	635	74.578	26.803	0.896	125.139	24097	1.31	0.764	0.922	1.1437		21	CEP170_KAN618-10_2.tif:0001-0372	1.174	103.195	0	383	74.578	26.803	0.896	121.115	23322	1.31	0.764	0.922
16	CEP83_KAN618-10_2.tif:0002-0469	0.545	174.533	0	550	26.949	33.795	0.907	95.17	18326	1.41	0.709	0.959	0.869796		22	CEP170_KAN618-10_2.tif:0002-0469	0.545	16.133	0	92	26.949	33.795	0.907	8.797	1694	1.41	0.709	0.959
17	CEP83_KAN618-10_2.tif:0003-0545	0.701	135.593	0	571	5.953	39.263	0.871	95.061	18305	1.391	0.719	0.944	0.868799		23	CEP170_KAN618-10_2.tif:0003-0545	0.701	69.348	0	253	5.953	39.263	0.871	48.618	9362	1.391	0.719	0.944
18	CEP83_KAN618-10_2.tif:0004-0967	0.608	139.35	0	501	75.469	69.76	0.876	84.669	16304	1.451	0.689	0.925	0.773827		24	CEP170_KAN618-10_2.tif:0004-0967	0.608	78.632	0	233	75.469	69.76	0.876	47.777	9200	1.451	0.689	0.925
19	CEP83_KAN618-10_2.tif:0005-1020	0.696	125.493	0	493	44.378	73.583	0.791	87.328	16816	1.302	0.768	0.905	0.798128		25	CEP170_KAN618-10_2.tif:0005-1020	0.696	66.149	0	182	44.378	73.583	0.791	46.032	8864	1.302	0.768	0.905
20	CEP83_KAN618-10_2.tif:0006-1174	0.898	126.59	0	605	35.709	84.644	0.751	113.73	21900	1.406	0.711	0.861	1.03943		26	CEP170_KAN618-10_2.tif:0006-1174	0.898	49.335	0	166	35.709	84.644	0.751	44.324	8535	1.406	0.711	0.861
27	CEP83_KAN618-10_3.tif:0001-0381	0.769	157.939	0	659	42.217	27.491	0.92	121.39	23375	1.067	0.937	0.946	1.10943		35	CEP170_KAN618-10_3.tif:0001-0381	0.769	88.412	0	304	42.217	27.491	0.92	67.952	13085	1.067	0.937	0.946
28	CEP83_KAN618-10_3.tif:0002-0512	1.013	95.872	0	609	21.011	36.881	0.734	97.086	18695	1.636	0.611	0.872	0.88731		36	CEP170_KAN618-10_3.tif:0002-0512	1.013	56.128	0	184	21.011	36.881	0.734	56.839	10945	1.636	0.611	0.872
29	CEP83_KAN618-10_3.tif:0003-0550	0.779	101.293	0	475	76.546	39.686	0.813	78.905	15194	1.503	0.665	0.909	0.721144		37	CEP170_KAN618-10_3.tif:0003-0550	0.779	79.853	0	245	76.546	39.686	0.813	62.204	11978	1.503	0.665	0.909
30	CEP83_KAN618-10_3.tif:0004-0591	0.878	139.586	0	689	60.392	42.559	0.877	122.506	23590	1.246	0.803	0.926	1.11964		38	CEP170_KAN618-10_3.tif:0004-0591	0.878	92.213	0	346	60.392	42.559	0.877	80.93	15584	1.246	0.803	0.926
31	CEP83_KAN618-10_3.tif:0005-0932	0.971	64.193	0	385	80.8	67.201	0.712	62.339	12004	2.064	0.485	0.852	0.569739		39	CEP170_KAN618-10_3.tif:0005-0932	0.971	68.225	0	266	80.8	67.201	0.712	66.254	12758	2.064	0.485	0.852
32	CEP83_KAN618-10_3.tif:0006-0965	1.288	68.976	0	435	10.982	69.57	0.727	88.834	17106	1.954	0.512	0.863	0.811892		40	CEP170_KAN618-10_3.tif:0006-0965	1.288	77.395	0	388	10.982	69.57	0.727	99.677	19194	1.954	0.512	0.863
33	CEP83_KAN618-10_3.tif:0007-0981	0.608	28.274	0	172	61.851	70.722	0.901	17.179	3308	1.333	0.75	0.921	0.157006		41	CEP170_KAN618-10_3.tif:0007-0981	0.608	113.385	0	373	61.851	70.722	0.901	68.892	13266	1.333	0.75	0.921
34	CEP83_KAN618-10_3.tif:0008-1206	0.831	103.875	0	539	21.53	86.921	0.733	86.31	16620	1.55	0.645	0.851	0.788825		42	CEP170_KAN618-10_3.tif:0008-1206	0.831	37.837	0	199	21.53	86.921	0.733	31.439	6054	1.55	0.645	0.851
43	CEP83_KAN618-10_4.tif:0001-0043	0.789	158.382	0	832	64.987	3.141	0.824	125.02	24074	1.258	0.795	0.918	1.14261		51	CEP170_KAN618-10_4.tif:0001-0043	0.789	71.908	0	207	64.987	3.141	0.824	56.761	10930	1.258	0.795	0.918
44	CEP83_KAN618-10_4.tif:0002-0233	0.95	143.224	0	685	24.348	16.809	0.885	136.112	26210	1.049	0.954	0.951	1.24399		52	CEP170_KAN618-10_4.tif:0002-0233	0.95	107.158	0	513	24.348	16.809	0.885	101.838	19610	1.049	0.954	0.951
45	CEP83_KAN618-10_4.tif:0003-0453	1.028	99.545	0	587	45.226	32.724	0.754	102.357	19710	1.311	0.762	0.852	0.935484		53	CEP170_KAN618-10_4.tif:0003-0453	1.028	60.843	0	231	45.226	32.724	0.754	62.562	12047	1.311	0.762	0.852
46	CEP83_KAN618-10_4.tif:0004-0454	0.846	67.196	0	289	64.879	32.734	0.763	56.881	10953	1.591	0.629	0.869	0.519856		54	CEP170_KAN618-10_4.tif:0004-0454	0.846	72.147	0	231	64.879	32.734	0.763	61.071	11760	1.591	0.629	0.869
47	CEP83_KAN618-10_4.tif:0005-0649	0.535	64.01	0	255	11.355	46.747	0.827	34.238	6593	1.538	0.65	0.904	0.31292		55	CEP170_KAN618-10_4.tif:0005-0649	0.535	105.864	0	206	11.355	46.747	0.827	56.626	10904	1.538	0.65	0.904
48	CEP83_KAN618-10_4.tif:0006-0678	1.179	171.868	0	1051	33.14	48.802	0.871	202.605	39014	1.238	0.808	0.95	1.8517		56	CEP170_KAN618-10_4.tif:0006-0678	1.179	81.705	0	388	33.14	48.802	0.871	96.317	18547	1.238	0.808	0.95
49	CEP83_KAN618-10_4.tif:0007-0711	1.049	111.431	0	601	52.327	51.282	0.908	116.893	22509	1.287	0.777	0.929	1.06833		57	CEP170_KAN618-10_4.tif:0007-0711	1.049	96.361	0	424	52.327	51.282	0.908	101.085	19465	1.287	0.777	0.929
50	CEP83_KAN618-10_4.tif:0008-1052	1.319	123.063	0	988	75.154	75.854	0.808	162.327	31258	1.619	0.618	0.912	1.48358		58	CEP170_KAN618-10_4.tif:0008-1052	1.319	100.217	0	396	75.154	75.854	0.808	132.192	25455	1.619	0.618	0.912
59	CEP83_KAN618-10_5.tif:0001-0107	1.22	102.289	0	698	76.908	7.726	0.718	124.833	24038	2.067	0.484	0.933	1.1409		68	CEP170_KAN618-10_5.tif:0001-0107	1.22	45.038	0	186	76.908	7.726	0.718	54.964	10584	2.067	0.484	0.933
60	CEP83_KAN618-10_5.tif:0002-0202	1.231	193.051	0	1169	34.808	14.592	0.813	237.602	45753	1.474	0.679	0.898	2.17155		69	CEP170_KAN618-10_5.tif:0002-0202	1.231	65.882	0	281	34.808	14.592	0.813	81.086	15614	1.474	0.679	0.898
61	CEP83_KAN618-10_5.tif:0003-0418	0.93	117.536	0	590	66.804	30.182	0.794	109.259	21039	1.462	0.684	0.899	0.998562		70	CEP170_KAN618-10_5.tif:0003-0418	0.93	77.408	0	275	66.804	30.182	0.794	71.956	13856	1.462	0.684	0.899
62	CEP83_KAN618-10_5.tif:0004-0525	0.525	150.624	0	398	0.606	37.842	0.941	79.003	15213	1.241	0.806	0.971	0.722046		71	CEP170_KAN618-10_5.tif:0004-0525	0.525	4.475	0	33	0.606	37.842	0.941	2.347	452	1.241	0.806	0.971
63	CEP83_KAN618-10_5.tif:0005-0766	1.106	129.352	0	661	88.522	55.254	0.897	143.082	27552	1.127	0.887	0.949	1.30768		72	CEP170_KAN618-10_5.tif:0005-0766	1.106	84.061	0	313	88.522	55.254	0.897	92.983	17905	1.127	0.887	0.949
64	CEP83_KAN618-10_5.tif:0006-0774	0.95	145.814	0	756	57.327	55.801	0.906	138.574	26684	1.098	0.91	0.948	1.26649		73	CEP170_KAN618-10_5.tif:0006-0774	0.95	123.956	0	361	57.327	55.801	0.906	117.801	22684	1.098	0.91	0.948
65	CEP83_KAN618-10_5.tif:0007-0877	0.717	132.312	0	590	10.408	63.276	0.706	94.822	18259	1.817	0.55	0.873	0.866616		74	CEP170_KAN618-10_5.tif:0007-0877	0.717	50.109	0	219	10.408	63.276	0.706	35.911	6915	1.817	0.55	0.873
66	CEP83_KAN618-10_5.tif:0008-0939	0.945	109.643	0	441	65.103	67.67	0.892	103.629	19955	1.35	0.741	0.945	0.947112		75	CEP170_KAN618-10_5.tif:0008-0939	0.945	101.973	0	376	65.103	67.67	0.892	96.38	18559	1.35	0.741	0.945
67	CEP83_KAN618-10_5.tif:0009-1115	0.779	82.607	0	446	17.476	80.333	0.743	64.348	12391	1.871	0.534	0.872	0.588107		76	CEP170_KAN618-10_5.tif:0009-1115	0.779	66.047	0	265	17.476	80.333	0.743	51.449	9907	1.871	0.534	0.872
77	CEP83_KAN618-10_6.tif:0001-0145	0.691	154.662	0	634	68.43	10.488	0.858	106.823	20570	1.101	0.908	0.93	0.976302		85	CEP170_KAN618-10_6.tif:0001-0145	0.691	81.03	0	223	68.43	10.488	0.858	55.967	10777	1.101	0.908	0.93
78	CEP83_KAN618-10_6.tif:0002-0204	0.805	84.226	0	316	79.374	14.773	0.659	67.797	13055	1.936	0.516	0.836	0.619622		86	CEP170_KAN618-10_6.tif:0002-0204	0.805	76.445	0	240	79.374	14.773	0.659	61.534	11849	1.936	0.516	0.836
79	CEP83_KAN618-10_6.tif:0003-0232	0.571	172.991	0	546	56.343	16.729	0.894	98.82	19029	1.321	0.757	0.961	0.903162		87	CEP170_KAN618-10_6.tif:0003-0232	0.571	5.764	0	52	56.343	16.729	0.894	3.292	634	1.321	0.757	0.961
80	CEP83_KAN618-10_6.tif:0004-0538	1.355	82.253	0	542	4.49	38.787	0.678	111.486	21468	2.26	0.442	0.924	1.01892		88	CEP170_KAN618-10_6.tif:0004-0538	1.355	53.042	0	250	4.49	38.787	0.678	71.894	13844	2.26	0.442	0.924
81	CEP83_KAN618-10_6.tif:0005-0620	1.283	115.283	0	654	81.488	44.687	0.706	147.875	28475	1.921	0.52	0.842	1.35149		89	CEP170_KAN618-10_6.tif:0005-0620	1.283	76.231	0	283	81.488	44.687	0.706	97.782	18829	1.921	0.52	0.842
82	CEP83_KAN618-10_6.tif:0006-0633	0.924	65.067	0	338	52.548	45.634	0.651	60.147	11582	2.263	0.442	0.824	0.54971		90	CEP170_KAN618-10_6.tif:0006-0633	0.924	80.225	0	312	52.548	45.634	0.651	74.158	14280	2.263	0.442	0.824
83	CEP83_KAN618-10_6.tif:0007-1020	0.67	19.217	0	82	43.489	73.519	0.943	12.874	2479	1.346	0.743	0.921	0.117659		91	CEP170_KAN618-10_6.tif:0007-1020	0.67	107.248	0	250	43.489	73.519	0.943	71.847	13835	1.346	0.743	0.921
84	CEP83_KAN618-10_6.tif:0008-1131	0.971	110.358	0	508	79.455	81.541	0.681	107.171	20637	2.398	0.417	0.921	0.979482		92	CEP170_KAN618-10_6.tif:0008-1131	0.971	42.856	0	207	79.455	81.541	0.681	41.618	8014	2.398	0.417	0.921
									AVERAGE	19739.4				0.93688
									S.E.M.	1164.63
93	CEP83_KAN618-11_1.tif:0001-0094	0.53	70.735	0	282	7.757	6.79	0.881	37.469	7215	1.448	0.691	0.94	0.342441		100	CEP170_KAN618-11_1.tif:0001-0094	0.53	100.02	0	223	7.757	6.79	0.881	52.98	10202	1.448	0.691	0.94
94	CEP83_KAN618-11_1.tif:0002-0284	0.8	107.279	0	539	55.475	20.426	0.745	85.796	16521	1.464	0.683	0.86	0.784126		101	CEP170_KAN618-11_1.tif:0002-0284	0.8	58.039	0	190	55.475	20.426	0.745	46.416	8938	1.464	0.683	0.86
95	CEP83_KAN618-11_1.tif:0003-0450	1.007	84.876	0	550	1.142	32.457	0.8	85.51	16466	1.611	0.621	0.915	0.781516		102	CEP170_KAN618-11_1.tif:0003-0450	1.007	83.985	0	213	1.142	32.457	0.8	84.612	16293	1.611	0.621	0.915
96	CEP83_KAN618-11_1.tif:0004-0495	0.846	104.423	0	468	26.836	35.707	0.807	88.393	17021	1.393	0.718	0.898	0.807858		103	CEP170_KAN618-11_1.tif:0004-0495	0.846	64.344	0	218	26.836	35.707	0.807	54.466	10488	1.393	0.718	0.898
97	CEP83_KAN618-11_1.tif:0005-0687	1.07	133.277	0	742	72.6	49.502	0.839	142.578	27455	1.473	0.679	0.943	1.30308		104	CEP170_KAN618-11_1.tif:0005-0687	1.07	69.932	0	330	72.6	49.502	0.839	74.812	14406	1.473	0.679	0.943
98	CEP83_KAN618-11_1.tif:0006-0954	1.007	124.639	0	660	35.321	68.753	0.888	125.57	24180	1.324	0.756	0.942	1.14764		105	CEP170_KAN618-11_1.tif:0006-0954	1.007	86.603	0	409	35.321	68.753	0.888	87.25	16801	1.324	0.756	0.942
99	CEP83_KAN618-11_1.tif:0007-1021	0.836	120.944	0	466	14.725	73.644	0.895	101.121	19472	1.31	0.763	0.961	0.924188		106	CEP170_KAN618-11_1.tif:0007-1021	0.836	85.925	0	286	14.725	73.644	0.895	71.842	13834	1.31	0.763	0.961
107	CEP83_KAN618-11_2.tif:0001-0082	1.028	179.434	0	1049	28.758	5.939	0.898	184.502	35528	1.257	0.795	0.932	1.68624		120	CEP170_KAN618-11_2.tif:0001-0082	1.028	104.889	0	492	28.758	5.939	0.898	107.851	20768	1.257	0.795	0.932
108	CEP83_KAN618-11_2.tif:0002-0082	0.904	115.632	0	658	68.099	6.006	0.779	104.486	20120	1.573	0.636	0.904	0.954944		121	CEP170_KAN618-11_2.tif:0002-0082	0.904	69.247	0	249	68.099	6.006	0.779	62.572	12049	1.573	0.636	0.904
109	CEP83_KAN618-11_2.tif:0003-0168	0.737	62.218	0	218	4.025	12.111	0.873	45.881	8835	1.13	0.885	0.902	0.41933		122	CEP170_KAN618-11_2.tif:0003-0168	0.737	119.958	0	314	4.025	12.111	0.873	88.46	17034	1.13	0.885	0.902
110	CEP83_KAN618-11_2.tif:0004-0268	1.085	131.512	0	713	88.678	19.31	0.796	142.739	27486	1.469	0.681	0.895	1.30455		123	CEP170_KAN618-11_2.tif:0004-0268	1.085	63.01	0	408	88.678	19.31	0.796	68.389	13169	1.469	0.681	0.895
111	CEP83_KAN618-11_2.tif:0005-0548	1.122	118.569	0	658	64.574	39.426	0.759	133.002	25611	1.503	0.665	0.893	1.21556		124	CEP170_KAN618-11_2.tif:0005-0548	1.122	59.056	0	246	64.574	39.426	0.759	66.244	12756	1.503	0.665	0.893
112	CEP83_KAN618-11_2.tif:0006-0621	1.205	100.797	0	712	2.969	44.764	0.815	121.442	23385	1.265	0.791	0.915	1.10991		125	CEP170_KAN618-11_2.tif:0006-0621	1.205	82.297	0	321	2.969	44.764	0.815	99.153	19093	1.265	0.791	0.915
113	CEP83_KAN618-11_2.tif:0007-0626	0.628	189.562	0	764	29.702	45.158	0.906	119.115	22937	1.341	0.746	0.942	1.08865		126	CEP170_KAN618-11_2.tif:0007-0626	0.628	51.488	0	207	29.702	45.158	0.906	32.353	6230	1.341	0.746	0.942
114	CEP83_KAN618-11_2.tif:0008-0767	1.033	157.131	0	825	78.491	55.274	0.803	162.385	31269	1.542	0.649	0.894	1.4841		127	CEP170_KAN618-11_2.tif:0008-0767	1.033	66.553	0	235	78.491	55.274	0.803	68.778	13244	1.542	0.649	0.894
115	CEP83_KAN618-11_2.tif:0009-0908	1.122	107.347	0	698	57.81	65.417	0.705	120.413	23187	1.783	0.561	0.834	1.10051		128	CEP170_KAN618-11_2.tif:0009-0908	1.122	72.926	0	316	57.81	65.417	0.705	81.802	15752	1.783	0.561	0.834
116	CEP83_KAN618-11_2.tif:0010-0907	0.576	60.613	0	218	22.933	65.365	0.881	34.939	6728	1.149	0.87	0.902	0.319327		129	CEP170_KAN618-11_2.tif:0010-0907	0.576	107.505	0	306	22.933	65.365	0.881	61.97	11933	1.149	0.87	0.902
117	CEP83_KAN618-11_2.tif:0011-1121	0.566	115.495	0	313	29.323	80.811	0.942	65.377	12589	1.212	0.825	0.969	0.597504		130	CEP170_KAN618-11_2.tif:0011-1121	0.566	98.771	0	233	29.323	80.811	0.942	55.909	10766	1.212	0.825	0.969
118	CEP83_KAN618-11_2.tif:0012-1155	1.137	110.676	0	676	48.084	83.246	0.794	125.871	24238	1.47	0.68	0.88	1.15039		131	CEP170_KAN618-11_2.tif:0012-1155	1.137	84.89	0	285	48.084	83.246	0.794	96.546	18591	1.47	0.68	0.88
119	CEP83_KAN618-11_2.tif:0013-1251	0.94	63.116	0	322	84.83	90.116	0.793	59.327	11424	1.274	0.785	0.905	0.542211		132	CEP170_KAN618-11_2.tif:0013-1251	0.94	90.11	0	353	84.83	90.116	0.793	84.7	16310	1.274	0.785	0.905
133	CEP83_KAN618-11_3.tif:0001-0249	0.924	101.32	0	508	47.708	17.918	0.79	93.658	18035	1.537	0.65	0.883	0.855985		142	CEP170_KAN618-11_3.tif:0001-0249	0.924	84.567	0	408	47.708	17.918	0.79	78.172	15053	1.537	0.65	0.883
134	CEP83_KAN618-11_3.tif:0002-0429	0.904	71	0	363	7.599	30.889	0.797	64.156	12354	1.727	0.579	0.921	0.586351		143	CEP170_KAN618-11_3.tif:0002-0429	0.904	92.425	0	282	7.599	30.889	0.797	83.516	16082	1.727	0.579	0.921
135	CEP83_KAN618-11_3.tif:0003-0497	1.47	114.986	0	784	87.954	35.844	0.674	168.99	32541	1.999	0.5	0.847	1.54447		144	CEP170_KAN618-11_3.tif:0003-0497	1.47	52.774	0	258	87.954	35.844	0.674	77.56	14935	1.999	0.5	0.847
136	CEP83_KAN618-11_3.tif:0004-0502	0.904	98.149	0	508	38.226	36.267	0.682	88.689	17078	2.042	0.49	0.833	0.810563		145	CEP170_KAN618-11_3.tif:0004-0502	0.904	64.287	0	238	38.226	36.267	0.682	58.091	11186	2.042	0.49	0.833
137	CEP83_KAN618-11_3.tif:0005-0761	1.174	169.761	0	1080	65.147	54.899	0.878	199.24	38366	1.214	0.824	0.919	1.82094		146	CEP170_KAN618-11_3.tif:0005-0761	1.174	95.898	0	459	65.147	54.899	0.878	112.551	21673	1.214	0.824	0.919
138	CEP83_KAN618-11_3.tif:0006-0857	0.67	153.24	0	653	26.171	61.774	0.902	102.658	19768	1.145	0.873	0.925	0.938237		147	CEP170_KAN618-11_3.tif:0006-0857	0.67	86.047	0	282	26.171	61.774	0.902	57.644	11100	1.145	0.873	0.925
139	CEP83_KAN618-11_3.tif:0007-0862	1.226	82.373	0	481	20.112	62.129	0.729	100.955	19440	1.818	0.55	0.894	0.922669		148	CEP170_KAN618-11_3.tif:0007-0862	1.226	58.725	0	272	20.112	62.129	0.729	71.972	13859	1.818	0.55	0.894
140	CEP83_KAN618-11_3.tif:0008-1184	1.007	71.046	0	291	43.696	85.324	0.751	71.577	13783	1.876	0.533	0.904	0.654174		149	CEP170_KAN618-11_3.tif:0008-1184	1.007	82.263	0	260	43.696	85.324	0.751	82.877	15959	1.876	0.533	0.904
141	CEP83_KAN618-11_3.tif:0009-1214	0.519	26.09	0	99	7.585	87.522	0.919	13.549	2609	1.044	0.958	0.922	0.123829		150	CEP170_KAN618-11_3.tif:0009-1214	0.519	111.26	1	241	7.585	87.522	0.919	57.779	11126	1.044	0.958	0.922
151	CEP83_KAN618-11_4.tif:0001-0165	0.826	110.981	0	581	60.433	11.87	0.745	91.638	17646	1.486	0.673	0.853	0.837522		158	CEP170_KAN618-11_4.tif:0001-0165	0.826	55.673	0	196	60.433	11.87	0.745	45.97	8852	1.486	0.673	0.853
152	CEP83_KAN618-11_4.tif:0002-0176	1.413	79.842	0	603	50.324	12.75	0.659	112.78	21717	2.135	0.468	0.845	1.03074		159	CEP170_KAN618-11_4.tif:0002-0176	1.413	68.765	0	315	50.324	12.75	0.659	97.133	18704	2.135	0.468	0.845
153	CEP83_KAN618-11_4.tif:0003-0485	1.449	109.409	0	820	77.639	34.988	0.763	158.521	30525	1.626	0.615	0.915	1.44879		160	CEP170_KAN618-11_4.tif:0003-0485	1.449	72.222	0	408	77.639	34.988	0.763	104.642	20150	1.626	0.615	0.915
154	CEP83_KAN618-11_4.tif:0004-0683	0.525	20.139	0	81	32.6	49.199	0.941	10.563	2034	1.111	0.9	0.967	0.0965385		161	CEP170_KAN618-11_4.tif:0004-0683	0.525	114.97	0	268	32.6	49.199	0.941	60.303	11612	1.111	0.9	0.967
155	CEP83_KAN618-11_4.tif:0005-0748	0.649	88.4	0	314	85.251	53.88	0.777	57.384	11050	1.375	0.727	0.871	0.52446		162	CEP170_KAN618-11_4.tif:0005-0748	0.649	84.856	0	208	85.251	53.88	0.777	55.084	10607	1.375	0.727	0.871
156	CEP83_KAN618-11_4.tif:0006-0803	1.117	70.577	0	482	43.278	57.869	0.749	78.801	15174	1.933	0.517	0.892	0.720195		163	CEP170_KAN618-11_4.tif:0006-0803	1.117	89.74	0	413	43.278	57.869	0.749	100.197	19294	1.933	0.517	0.892
157	CEP83_KAN618-11_4.tif:0007-0932	0.587	156.681	0	521	59.359	67.17	0.856	91.945	17705	1.417	0.706	0.938	0.840322		164	CEP170_KAN618-11_4.tif:0007-0932	0.587	50.673	0	165	59.359	67.17	0.856	29.736	5726	1.417	0.706	0.938
165	CEP83_KAN618-11_5.tif:0001-0269	0.815	30.86	0	147	91.252	19.412	0.843	25.161	4845	1.04	0.961	0.908	0.229955		174	CEP170_KAN618-11_5.tif:0001-0269	0.815	100.535	0	271	91.252	19.412	0.843	81.969	15784	1.04	0.961	0.908
166	CEP83_KAN618-11_5.tif:0002-0278	1.298	83.38	0	592	20.918	20.013	0.662	108.251	20845	2.198	0.455	0.843	0.989354		175	CEP170_KAN618-11_5.tif:0002-0278	1.298	70.94	0	272	20.918	20.013	0.662	92.1	17735	2.198	0.455	0.843
167	CEP83_KAN618-11_5.tif:0003-0288	1.641	103.468	0	872	42.727	20.724	0.697	169.795	32696	1.878	0.533	0.874	1.55183		176	CEP170_KAN618-11_5.tif:0003-0288	1.641	64.019	0	344	42.727	20.724	0.697	105.057	20230	1.878	0.533	0.874
168	CEP83_KAN618-11_5.tif:0004-0297	0.961	150.114	0	896	77.736	21.414	0.803	144.219	27771	1.879	0.532	0.946	1.31808		177	CEP170_KAN618-11_5.tif:0004-0297	0.961	72.054	0	280	77.736	21.414	0.803	69.225	13330	1.879	0.532	0.946
169	CEP83_KAN618-11_5.tif:0005-0729	0.846	164.669	0	766	7.437	52.586	0.897	139.389	26841	1.188	0.842	0.945	1.27394		178	CEP170_KAN618-11_5.tif:0005-0729	0.846	117.227	0	326	7.437	52.586	0.897	99.231	19108	1.188	0.842	0.945
170	CEP83_KAN618-11_5.tif:0006-0769	1.745	119.262	0	1034	60.61	55.429	0.77	208.1	40072	1.563	0.64	0.906	1.90191		179	CEP170_KAN618-11_5.tif:0006-0769	1.745	56.881	0	325	60.61	55.429	0.77	99.251	19112	1.563	0.64	0.906
171	CEP83_KAN618-11_5.tif:0007-0779	1.262	126.469	0	824	54.404	56.283	0.683	159.596	30732	1.511	0.662	0.831	1.45861		180	CEP170_KAN618-11_5.tif:0007-0779	1.262	63.494	0	260	54.404	56.283	0.683	80.125	15429	1.511	0.662	0.831
172	CEP83_KAN618-11_5.tif:0008-0863	0.904	107.603	0	491	37.114	62.244	0.755	97.231	18723	1.676	0.597	0.868	0.888639		181	CEP170_KAN618-11_5.tif:0008-0863	0.904	62.339	0	177	37.114	62.244	0.755	56.33	10847	1.676	0.597	0.868
173	CEP83_KAN618-11_5.tif:0009-1147	1.189	121.956	0	679	58.11	82.678	0.689	145.034	27928	1.664	0.601	0.84	1.32553		182	CEP170_KAN618-11_5.tif:0009-1147	1.189	73.777	0	328	58.11	82.678	0.689	87.738	16895	1.664	0.601	0.84
183	CEP83_KAN618-11_6.tif:0001-0486	1.179	94.771	0	642	58.317	35.074	0.733	111.72	21513	1.974	0.507	0.903	1.02106		188	CEP170_KAN618-11_6.tif:0001-0486	1.179	46.828	0	229	58.317	35.074	0.733	55.203	10630	1.974	0.507	0.903
184	CEP83_KAN618-11_6.tif:0002-0707	1.122	107.176	0	621	52.589	50.941	0.796	120.221	23150	1.238	0.808	0.909	1.09875		189	CEP170_KAN618-11_6.tif:0002-0707	1.122	83.792	0	295	52.589	50.941	0.796	93.991	18099	1.238	0.808	0.909
185	CEP83_KAN618-11_6.tif:0003-0708	1.413	130.04	0	926	82.088	51.066	0.716	183.687	35371	1.807	0.553	0.857	1.67879		190	CEP170_KAN618-11_6.tif:0003-0708	1.413	73.654	0	350	82.088	51.066	0.716	104.04	20034	1.807	0.553	0.857
186	CEP83_KAN618-11_6.tif:0004-0742	1.309	105.448	0	617	20.091	53.516	0.672	137.997	26573	1.917	0.522	0.839	1.26122		191	CEP170_KAN618-11_6.tif:0004-0742	1.309	50.575	0	270	20.091	53.516	0.672	66.187	12745	1.917	0.522	0.839
187	CEP83_KAN618-11_6.tif:0005-1016	1.252	72.759	0	561	51.615	73.262	0.772	91.062	17535	1.678	0.596	0.88	0.832253		192	CEP170_KAN618-11_6.tif:0005-1016	1.252	70.672	0	321	51.615	73.262	0.772	88.45	17032	1.678	0.596	0.88
193	CEP83_KAN618-11_7.tif:0001-0199	1.059	105.422	0	606	80.494	14.406	0.859	111.684	21506	1.417	0.706	0.934	1.02073		203	CEP170_KAN618-11_7.tif:0001-0199	1.059	106.103	0	395	80.494	14.406	0.859	112.406	21645	1.417	0.706	0.934
194	CEP83_KAN618-11_7.tif:0002-0368	1.039	127.845	0	670	80.087	26.558	0.824	132.784	25569	1.638	0.61	0.932	1.21357		204	CEP170_KAN618-11_7.tif:0002-0368	1.039	94.355	0	319	80.087	26.558	0.824	98	18871	1.638	0.61	0.932
195	CEP83_KAN618-11_7.tif:0003-0395	1.329	80.586	0	522	42.322	28.435	0.738	107.135	20630	1.639	0.61	0.883	0.979149		205	CEP170_KAN618-11_7.tif:0003-0395	1.329	64.047	0	357	42.322	28.435	0.738	85.147	16396	1.639	0.61	0.883
196	CEP83_KAN618-11_7.tif:0004-0397	0.826	66.516	0	402	65.961	28.682	0.762	54.923	10576	1.476	0.678	0.855	0.501962		206	CEP170_KAN618-11_7.tif:0004-0397	0.826	78.082	0	256	65.961	28.682	0.762	64.473	12415	1.476	0.678	0.855
197	CEP83_KAN618-11_7.tif:0005-0658	1.314	99.253	0	639	50.151	47.457	0.721	130.405	25111	1.999	0.5	0.904	1.19183		207	CEP170_KAN618-11_7.tif:0005-0658	1.314	56.711	0	264	50.151	47.457	0.721	74.511	14348	1.999	0.5	0.904
198	CEP83_KAN618-11_7.tif:0006-0767	1.231	108.114	0	792	73.291	55.337	0.817	133.064	25623	1.34	0.746	0.926	1.21613		208	CEP170_KAN618-11_7.tif:0006-0767	1.231	94.565	0	490	73.291	55.337	0.817	116.389	22412	1.34	0.746	0.926
199	CEP83_KAN618-11_7.tif:0007-0840	1.329	94.535	0	587	32.261	60.564	0.712	125.679	24201	2.032	0.492	0.875	1.14864		209	CEP170_KAN618-11_7.tif:0007-0840	1.329	69.961	0	404	32.261	60.564	0.712	93.009	17910	2.032	0.492	0.875
200	CEP83_KAN618-11_7.tif:0008-1003	0.769	184.176	0	904	85.504	72.328	0.874	141.555	27258	1.283	0.779	0.949	1.29373		210	CEP170_KAN618-11_7.tif:0008-1003	0.769	86.777	0	260	85.504	72.328	0.874	66.696	12843	1.283	0.779	0.949
201	CEP83_KAN618-11_7.tif:0009-1007	0.706	135.618	0	677	62.101	72.552	0.926	95.782	18444	1.255	0.797	0.954	0.875397		211	CEP170_KAN618-11_7.tif:0009-1007	0.706	93.64	0	261	62.101	72.552	0.926	66.135	12735	1.255	0.797	0.954
202	CEP83_KAN618-11_7.tif:0010-1021	0.883	89.465	0	400	29.855	73.58	0.686	78.983	15209	2.078	0.481	0.85	0.721856		212	CEP170_KAN618-11_7.tif:0010-1021	0.883	51.094	0	206	29.855	73.58	0.686	45.108	8686	2.078	0.481	0.85
									AVERAGE	21003.6				0.99688
									S.E.M.	1096.42
214	CEP83_KAN618-12_1.tif:0002-0263	0.846	86.221	0	464	19.554	18.894	0.723	72.984	14054	1.477	0.677	0.838	0.667037		220	CEP170_KAN618-12_1.tif:0002-0263	0.846	77.172	0	255	19.554	18.894	0.723	65.325	12579	1.477	0.677	0.838
215	CEP83_KAN618-12_1.tif:0003-0526	0.924	111.82	0	621	24.745	37.955	0.83	103.364	19904	1.206	0.829	0.957	0.944692		221	CEP170_KAN618-12_1.tif:0003-0526	0.924	80.096	0	264	24.745	37.955	0.83	74.039	14257	1.206	0.829	0.957
216	CEP83_KAN618-12_1.tif:0004-0532	0.888	75.082	0	419	58.293	38.398	0.866	66.675	12839	1.331	0.751	0.924	0.60937		222	CEP170_KAN618-12_1.tif:0004-0532	0.888	77.193	0	202	58.293	38.398	0.866	68.55	13200	1.331	0.751	0.924
217	CEP83_KAN618-12_1.tif:0005-0679	0.846	131.055	0	594	0.841	48.915	0.846	110.936	21362	1.184	0.844	0.908	1.01389		223	CEP170_KAN618-12_1.tif:0005-0679	0.846	85.945	0	315	0.841	48.915	0.846	72.751	14009	1.184	0.844	0.908
218	CEP83_KAN618-12_1.tif:0006-1044	0.914	134.767	0	729	84.791	75.232	0.754	123.176	23719	1.453	0.688	0.898	1.12576		224	CEP170_KAN618-12_1.tif:0006-1044	0.914	54.119	0	238	84.791	75.232	0.754	49.465	9525	1.453	0.688	0.898
225	CEP83_KAN618-12_2.tif:0001-0239	0.872	123.75	0	521	75.482	17.258	0.78	107.966	20790	1.722	0.581	0.88	0.986743		230	CEP170_KAN618-12_2.tif:0001-0239	0.872	57.464	0	245	75.482	17.258	0.78	50.135	9654	1.722	0.581	0.88
226	CEP83_KAN618-12_2.tif:0002-0442	0.821	95.703	0	427	30.466	31.853	0.657	78.526	15121	1.986	0.504	0.827	0.717679		231	CEP170_KAN618-12_2.tif:0002-0442	0.821	62.006	0	271	30.466	31.853	0.657	50.877	9797	1.986	0.504	0.827
227	CEP83_KAN618-12_2.tif:0003-0474	1.075	129.87	0	756	75.922	34.251	0.713	139.607	26883	1.729	0.578	0.879	1.27593		232	CEP170_KAN618-12_2.tif:0003-0474	1.075	54.913	0	234	75.922	34.251	0.713	59.031	11367	1.729	0.578	0.879
228	CEP83_KAN618-12_2.tif:0004-1026	0.924	56.427	0	349	20.298	73.933	0.734	52.16	10044	1.267	0.79	0.844	0.476712		233	CEP170_KAN618-12_2.tif:0004-1026	0.924	94.09	0	327	20.298	73.933	0.734	86.975	16748	1.267	0.79	0.844
229	CEP83_KAN618-12_2.tif:0005-1086	0.831	106.838	0	466	71.091	78.266	0.868	88.772	17094	1.089	0.918	0.941	0.811322		234	CEP170_KAN618-12_2.tif:0005-1086	0.831	64.906	0	204	71.091	78.266	0.868	53.931	10385	1.089	0.918	0.941
235	CEP83_KAN618-12_3.tif:0001-0197	1.049	95.639	0	388	25.119	14.14	0.67	100.326	19319	2.283	0.438	0.874	0.916926		241	CEP170_KAN618-12_3.tif:0001-0197	1.049	60.262	0	247	25.119	14.14	0.67	63.216	12173	2.283	0.438	0.874
236	CEP83_KAN618-12_3.tif:0002-0198	0.841	124.13	0	662	83.593	14.281	0.841	104.429	20109	1.44	0.695	0.908	0.954422		242	CEP170_KAN618-12_3.tif:0002-0198	0.841	75.944	0	233	83.593	14.281	0.841	63.891	12303	1.44	0.695	0.908
237	CEP83_KAN618-12_3.tif:0003-0528	0.789	145.579	0	651	11.142	38.101	0.719	114.914	22128	1.663	0.601	0.859	1.05025		243	CEP170_KAN618-12_3.tif:0003-0528	0.789	48.316	0	193	11.142	38.101	0.719	38.138	7344	1.663	0.601	0.859
238	CEP83_KAN618-12_3.tif:0004-0548	0.628	244.38	0	854	37.975	39.529	0.891	153.561	29570	1.378	0.726	0.972	1.40346		244	CEP170_KAN618-12_3.tif:0004-0548	0.628	6.835	0	79	37.975	39.529	0.891	4.295	827	1.378	0.726	0.972
239	CEP83_KAN618-12_3.tif:0005-0728	0.665	56.32	0	211	43.115	52.471	0.838	37.437	7209	1.673	0.598	0.905	0.342156		245	CEP170_KAN618-12_3.tif:0005-0728	0.665	106.93	0	207	43.115	52.471	0.838	71.079	13687	1.673	0.598	0.905
240	CEP83_KAN618-12_3.tif:0006-1121	1.189	69.913	0	483	6.383	80.81	0.759	83.142	16010	2.005	0.499	0.933	0.759873		246	CEP170_KAN618-12_3.tif:0006-1121	1.189	53.192	0	255	6.383	80.81	0.759	63.258	12181	2.005	0.499	0.933
247	CEP83_KAN618-12_5.tif:0001-0550	0.727	159.336	0	629	90.172	39.724	0.797	115.844	22307	1.096	0.912	0.889	1.05874		253	CEP170_KAN618-12_5.tif:0001-0550	0.727	52.3	0	197	90.172	39.724	0.797	38.024	7322	1.096	0.912	0.889
248	CEP83_KAN618-12_5.tif:0002-0561	0.737	105.458	0	438	36.096	40.466	0.809	77.767	14975	1.365	0.732	0.893	0.71075		254	CEP170_KAN618-12_5.tif:0002-0561	0.737	76.077	0	193	36.096	40.466	0.809	56.102	10803	1.365	0.732	0.893
249	CEP83_KAN618-12_5.tif:0003-0762	0.94	117.033	0	541	67.141	54.882	0.84	110.006	21183	1.49	0.671	0.905	1.0054		255	CEP170_KAN618-12_5.tif:0003-0762	0.94	77.779	0	284	67.141	54.882	0.84	73.109	14078	1.49	0.671	0.905
250	CEP83_KAN618-12_5.tif:0004-0769	0.924	137.416	0	681	15.343	55.425	0.853	127.024	24460	1.373	0.728	0.918	1.16093		256	CEP170_KAN618-12_5.tif:0004-0769	0.924	69.303	0	289	15.343	55.425	0.853	64.063	12336	1.373	0.728	0.918
251	CEP83_KAN618-12_5.tif:0005-0894	0.976	115.165	0	507	67.987	64.434	0.922	112.437	21651	1.173	0.852	0.938	1.02761		257	CEP170_KAN618-12_5.tif:0005-0894	0.976	82.894	0	267	67.987	64.434	0.922	80.93	15584	1.173	0.852	0.938
252	CEP83_KAN618-12_5.tif:0006-0902	0.961	137.459	0	742	38.897	65.002	0.71	132.062	25430	1.735	0.576	0.835	1.20697		258	CEP170_KAN618-12_5.tif:0006-0902	0.961	59.395	0	234	38.897	65.002	0.71	57.062	10988	1.735	0.576	0.835
259	CEP83_KAN618-12_6.tif:0001-0314	1.231	78.321	0	384	78.731	22.593	0.759	96.395	18562	1.55	0.645	0.884	0.880997		266	CEP170_KAN618-12_6.tif:0001-0314	1.231	78.203	0	244	78.731	22.593	0.759	96.25	18534	1.55	0.645	0.884
260	CEP83_KAN618-12_6.tif:0002-0372	1.246	90.033	0	583	37.048	26.701	0.709	112.214	21608	1.267	0.789	0.847	1.02557		267	CEP170_KAN618-12_6.tif:0002-0372	1.246	74.037	0	284	37.048	26.701	0.709	92.277	17769	1.267	0.789	0.847
261	CEP83_KAN618-12_6.tif:0003-0536	0.966	108.602	0	646	47.615	38.639	0.863	104.902	20200	1.043	0.959	0.905	0.958741		268	CEP170_KAN618-12_6.tif:0003-0536	0.966	94.688	0	296	47.615	38.639	0.863	91.462	17612	1.043	0.959	0.905
262	CEP83_KAN618-12_6.tif:0004-0786	0.919	128.61	0	701	33.43	56.658	0.856	118.217	22764	1.084	0.923	0.932	1.08043		269	CEP170_KAN618-12_6.tif:0004-0786	0.919	78.576	0	296	33.43	56.658	0.856	72.226	13908	1.084	0.923	0.932
263	CEP83_KAN618-12_6.tif:0005-0786	0.826	141.308	0	664	76.982	56.676	0.833	116.68	22468	1.274	0.785	0.911	1.06639		270	CEP170_KAN618-12_6.tif:0005-0786	0.826	77.396	0	245	76.982	56.676	0.833	63.907	12306	1.274	0.785	0.911
264	CEP83_KAN618-12_6.tif:0006-0863	0.831	146.269	0	698	10.659	62.215	0.8	121.535	23403	1.413	0.708	0.925	1.11076		271	CEP170_KAN618-12_6.tif:0006-0863	0.831	39.587	0	187	10.659	62.215	0.8	32.893	6334	1.413	0.708	0.925
265	CEP83_KAN618-12_6.tif:0007-1218	0.878	91.491	0	370	39.018	87.713	0.654	80.296	15462	1.656	0.604	0.803	0.733864		272	CEP170_KAN618-12_6.tif:0007-1218	0.878	54.414	0	180	39.018	87.713	0.654	47.756	9196	1.656	0.604	0.803
									AVERAGE	19676.8				0.93391
									S.E.M.	921.463
273	CEP83_KAN618-13_1.tif:0001-0265	1.345	78.425	0	536	70.91	19.129	0.67	105.483	20312	2.026	0.493	0.83	0.964056		277	CEP170_KAN618-13_1.tif:0001-0265	1.345	65.764	0	269	70.91	19.129	0.67	88.455	17033	2.026	0.493	0.83
274	CEP83_KAN618-13_1.tif:0002-0299	1.262	87.383	0	552	30.798	21.555	0.705	110.271	21234	2.052	0.487	0.9	1.00782		278	CEP170_KAN618-13_1.tif:0002-0299	1.262	64	0	274	30.798	21.555	0.705	80.764	15552	2.052	0.487	0.9
275	CEP83_KAN618-13_1.tif:0003-0707	1.137	120.379	0	693	52.777	50.963	0.77	136.907	26363	1.924	0.52	0.926	1.25125		279	CEP170_KAN618-13_1.tif:0003-0707	1.137	82.096	0	394	52.777	50.963	0.77	93.368	17979	1.924	0.52	0.926
276	CEP83_KAN618-13_1.tif:0004-1004	0.654	135.651	0	560	69.139	72.406	0.7	88.761	17092	1.959	0.511	0.857	0.811227		280	CEP170_KAN618-13_1.tif:0004-1004	0.654	39.167	0	180	69.139	72.406	0.7	25.628	4935	1.959	0.511	0.857
281	CEP83_KAN618-13_2.tif:0001-0209	0.556	99.607	0	348	66.652	15.064	0.779	55.349	10658	1.912	0.523	0.895	0.505854		286	CEP170_KAN618-13_2.tif:0001-0209	0.556	66.692	0	221	66.652	15.064	0.779	37.058	7136	1.912	0.523	0.895
282	CEP83_KAN618-13_2.tif:0002-0253	1.013	112.236	0	577	9.686	18.242	0.719	113.657	21886	1.374	0.728	0.852	1.03876		287	CEP170_KAN618-13_2.tif:0002-0253	1.013	58.708	0	249	9.686	18.242	0.719	59.451	11448	1.374	0.728	0.852
283	CEP83_KAN618-13_2.tif:0003-0467	1.189	106.847	0	650	77.056	33.7	0.655	127.066	24468	2.113	0.473	0.833	1.16131		288	CEP170_KAN618-13_2.tif:0003-0467	1.189	63.31	0	272	77.056	33.7	0.655	75.29	14498	2.113	0.473	0.833
284	CEP83_KAN618-13_2.tif:0004-0565	0.888	128.292	0	664	54.41	40.667	0.808	113.927	21938	1.471	0.68	0.919	1.04123		289	CEP170_KAN618-13_2.tif:0004-0565	0.888	34.421	0	236	54.41	40.667	0.808	30.567	5886	1.471	0.68	0.919
285	CEP83_KAN618-13_2.tif:0005-0945	0.935	149.7	0	739	60.417	68.183	0.835	139.935	26946	1.335	0.749	0.907	1.27892		290	CEP170_KAN618-13_2.tif:0005-0945	0.935	63.9	0	178	60.417	68.183	0.835	59.732	11502	1.335	0.749	0.907
291	CEP83_KAN618-13_3.tif:0001-0433	0.545	141.067	0	479	91.708	31.223	0.854	76.921	14812	1.437	0.696	0.955	0.703013		297	CEP170_KAN618-13_3.tif:0001-0433	0.545	73.876	0	289	91.708	31.223	0.854	40.283	7757	1.437	0.696	0.955
292	CEP83_KAN618-13_3.tif:0002-0571	0.711	154.088	0	658	60.973	41.188	0.809	109.627	21110	1.592	0.628	0.929	1.00193		298	CEP170_KAN618-13_3.tif:0002-0571	0.711	82.774	0	262	60.973	41.188	0.809	58.89	11340	1.592	0.628	0.929
293	CEP83_KAN618-13_3.tif:0003-0671	1.07	185.466	0	1147	78.159	48.436	0.875	198.409	38206	1.114	0.898	0.941	1.81335		299	CEP170_KAN618-13_3.tif:0003-0671	1.07	75.058	0	378	78.159	48.436	0.875	80.296	15462	1.114	0.898	0.941
294	CEP83_KAN618-13_3.tif:0004-0769	0.976	123.011	0	636	24.687	55.456	0.75	120.097	23126	1.479	0.676	0.9	1.09762		300	CEP170_KAN618-13_3.tif:0004-0769	0.976	52.665	0	191	24.687	55.456	0.75	51.417	9901	1.479	0.676	0.9
295	CEP83_KAN618-13_3.tif:0005-0773	0.711	96.533	0	412	9.131	55.781	0.8	68.679	13225	1.46	0.685	0.881	0.62769		301	CEP170_KAN618-13_3.tif:0005-0773	0.711	71.241	0	183	9.131	55.781	0.8	50.685	9760	1.46	0.685	0.881
296	CEP83_KAN618-13_3.tif:0006-1086	0.914	113.386	0	639	72.169	78.344	0.788	103.634	19956	1.395	0.717	0.905	0.94716		302	CEP170_KAN618-13_3.tif:0006-1086	0.914	69.312	0	243	72.169	78.344	0.788	63.351	12199	1.395	0.717	0.905
303	CEP83_KAN618-13_4.tif:0001-0269	1.132	125.945	0	627	36.614	19.399	0.844	142.583	27456	1.468	0.681	0.94	1.30313		306	CEP170_KAN618-13_4.tif:0001-0269	1.132	64.271	0	264	36.614	19.399	0.844	72.761	14011	1.468	0.681	0.94
304	CEP83_KAN618-13_4.tif:0002-0611	0.945	111.78	0	577	49.875	44.014	0.841	105.649	20344	1.474	0.678	0.953	0.965575		307	CEP170_KAN618-13_4.tif:0002-0611	0.945	62.736	0	225	49.875	44.014	0.841	59.295	11418	1.474	0.678	0.953
305	CEP83_KAN618-13_4.tif:0003-0978	1.085	110.019	0	698	28.458	70.522	0.833	119.411	22994	1.487	0.672	0.952	1.09135		308	CEP170_KAN618-13_4.tif:0003-0978	1.085	69.383	0	285	28.458	70.522	0.833	75.306	14501	1.487	0.672	0.952
309	CEP83_KAN618-13_5.tif:0001-0061	1.039	145.095	0	687	27.123	4.381	0.907	150.7	29019	1.377	0.726	0.948	1.37731		316	CEP170_KAN618-13_5.tif:0001-0061	1.039	106.23	0	468	27.123	4.381	0.907	110.334	21246	1.377	0.726	0.948
310	CEP83_KAN618-13_5.tif:0002-0495	1.381	201.82	0	1616	83.27	35.646	0.878	278.789	53684	1.298	0.77	0.932	2.54797		317	CEP170_KAN618-13_5.tif:0002-0495	1.381	106.523	0	484	83.27	35.646	0.878	147.148	28335	1.298	0.77	0.932
311	CEP83_KAN618-13_5.tif:0003-0564	0.919	125.791	0	716	20.952	40.635	0.821	115.625	22265	1.248	0.801	0.887	1.05675		318	CEP170_KAN618-13_5.tif:0003-0564	0.919	78.237	0	218	20.952	40.635	0.821	71.915	13848	1.248	0.801	0.887
312	CEP83_KAN618-13_5.tif:0004-0566	0.779	33.207	0	141	61.094	40.756	0.899	25.867	4981	1.135	0.881	0.929	0.23641		319	CEP170_KAN618-13_5.tif:0004-0566	0.779	156.907	0	542	61.094	40.756	0.899	122.226	23536	1.135	0.881	0.929
313	CEP83_KAN618-13_5.tif:0005-0780	1.257	124.202	0	775	83.79	56.265	0.767	156.09	30057	1.508	0.663	0.9	1.42658		320	CEP170_KAN618-13_5.tif:0005-0780	1.257	86.281	0	351	83.79	56.265	0.767	108.433	20880	1.508	0.663	0.9
314	CEP83_KAN618-13_5.tif:0006-0910	1.117	140.149	0	795	15.366	65.619	0.86	156.48	30132	1.335	0.749	0.915	1.43014		321	CEP170_KAN618-13_5.tif:0006-0910	1.117	69.256	0	233	15.366	65.619	0.86	77.326	14890	1.335	0.749	0.915
315	CEP83_KAN618-13_5.tif:0007-0948	0.566	72.101	0	242	52.656	68.332	0.959	40.813	7859	1.097	0.911	0.94	0.373007		322	CEP170_KAN618-13_5.tif:0007-0948	0.566	116.963	0	354	52.656	68.332	0.959	66.207	12749	1.097	0.911	0.94
323	CEP83_KAN618-13_6.tif:0001-0172	1.122	73.972	0	436	58.645	12.342	0.765	82.976	15978	1.799	0.556	0.939	0.758354		332	CEP170_KAN618-13_6.tif:0001-0172	1.122	66.394	0	306	58.645	12.342	0.765	74.475	14341	1.799	0.556	0.939
324	CEP83_KAN618-13_6.tif:0002-0452	1.158	164.166	0	970	76.964	32.553	0.866	190.116	36609	1.215	0.823	0.907	1.73755		333	CEP170_KAN618-13_6.tif:0002-0452	1.158	76.35	0	336	76.964	32.553	0.866	88.419	17026	1.215	0.823	0.907
325	CEP83_KAN618-13_6.tif:0003-0578	0.883	108.271	0	562	35.917	41.668	0.842	95.585	18406	1.359	0.736	0.929	0.873593		334	CEP170_KAN618-13_6.tif:0003-0578	0.883	80.653	0	264	35.917	41.668	0.842	71.203	13711	1.359	0.736	0.929
326	CEP83_KAN618-13_6.tif:0004-0678	1.127	134.613	0	780	86.412	48.923	0.793	151.697	29211	1.483	0.674	0.904	1.38642		335	CEP170_KAN618-13_6.tif:0004-0678	1.127	86.018	0	322	86.412	48.923	0.793	96.935	18666	1.483	0.674	0.904
327	CEP83_KAN618-13_6.tif:0005-0804	1.283	140.883	0	915	62.261	57.993	0.888	180.711	34798	1.346	0.743	0.911	1.6516		336	CEP170_KAN618-13_6.tif:0005-0804	1.283	99.543	0	461	62.261	57.993	0.888	127.684	24587	1.346	0.743	0.911
328	CEP83_KAN618-13_6.tif:0006-0962	0.571	55.891	0	168	35.812	69.314	0.823	31.927	6148	1.462	0.684	0.887	0.291799		337	CEP170_KAN618-13_6.tif:0006-0962	0.571	113.127	0	263	35.812	69.314	0.823	64.624	12444	1.462	0.684	0.887
329	CEP83_KAN618-13_6.tif:0007-1031	0.821	102.525	0	475	79.816	74.308	0.82	84.124	16199	1.458	0.686	0.895	0.768844		338	CEP170_KAN618-13_6.tif:0007-1031	0.821	78.696	0	257	79.816	74.308	0.82	64.572	12434	1.458	0.686	0.895
330	CEP83_KAN618-13_6.tif:0008-1053	0.867	128.287	0	629	82.749	75.935	0.919	111.258	21424	1.179	0.848	0.946	1.01683		339	CEP170_KAN618-13_6.tif:0008-1053	0.867	71.772	0	230	82.749	75.935	0.919	62.245	11986	1.179	0.848	0.946
331	CEP83_KAN618-13_6.tif:0009-1098	0.857	149.182	0	649	58.577	79.13	0.817	127.829	24615	1.074	0.931	0.897	1.16829		340	CEP170_KAN618-13_6.tif:0009-1098	0.857	69.842	0	262	58.577	79.13	0.817	59.846	11524	1.074	0.931	0.897
									AVERAGE	22750.3				1.07979
									S.E.M.	1652
341	CEP83_KAN618-14_1.tif:0001-0116	1.013	171.072	0	935	32.045	8.426	0.771	173.238	33359	1.476	0.677	0.888	1.5833		347	CEP170_KAN618-14_1.tif:0001-0116	1.013	47.667	0	206	32.045	8.426	0.771	48.27	9295	1.476	0.677	0.888
342	CEP83_KAN618-14_1.tif:0002-0313	1.355	95.448	0	696	10.516	22.6	0.788	129.372	24912	1.686	0.593	0.882	1.18238		348	CEP170_KAN618-14_1.tif:0002-0313	1.355	100.479	0	470	10.516	22.6	0.788	136.19	26225	1.686	0.593	0.882
343	CEP83_KAN618-14_1.tif:0003-0340	1.085	79.029	0	344	62.484	24.542	0.764	85.775	16517	1.652	0.606	0.891	0.783937		349	CEP170_KAN618-14_1.tif:0003-0340	1.085	85.502	0	331	62.484	24.542	0.764	92.802	17870	1.652	0.606	0.891
344	CEP83_KAN618-14_1.tif:0004-0599	1.153	115.532	0	775	18.126	43.206	0.828	133.194	25648	1.614	0.62	0.917	1.21732		350	CEP170_KAN618-14_1.tif:0004-0599	1.153	96.414	0	433	18.126	43.206	0.828	111.154	21404	1.614	0.62	0.917
345	CEP83_KAN618-14_1.tif:0005-0710	1.215	120.735	0	663	63.489	51.127	0.704	146.717	28252	1.449	0.69	0.837	1.34091		351	CEP170_KAN618-14_1.tif:0005-0710	1.215	74.449	0	338	63.489	51.127	0.704	90.47	17421	1.449	0.69	0.837
346	CEP83_KAN618-14_1.tif:0006-0863	0.795	67.725	0	338	49.663	62.206	0.842	53.811	10362	1.557	0.642	0.922	0.491805		352	CEP170_KAN618-14_1.tif:0006-0863	0.795	99.02	0	295	49.663	62.206	0.842	78.676	15150	1.557	0.642	0.922
353	CEP83_KAN618-14_2.tif:0001-0716	0.571	178.773	0	583	60.356	51.631	0.894	102.123	19665	1.482	0.675	0.978	0.933348		358	CEP170_KAN618-14_3.tif:0001-0690	1.028	68.803	0	279	7.681	49.766	0.849	70.746	13623	1.457	0.686	0.95
354	CEP83_KAN618-14_3.tif:0001-0690	1.028	102.732	0	492	7.681	49.766	0.849	105.634	20341	1.457	0.686	0.95	0.965433		359	CEP170_KAN618-14_3.tif:0002-0741	0.576	59.288	0	156	55.793	53.424	0.891	34.176	6581	1.392	0.718	0.925
355	CEP83_KAN618-14_3.tif:0002-0741	0.576	144.955	0	340	55.793	53.424	0.891	83.558	16090	1.392	0.718	0.925	0.76367		360	CEP170_KAN618-14_3.tif:0003-0860	0.826	52.943	0	207	34.171	62.026	0.806	43.716	8418	1.546	0.647	0.896
356	CEP83_KAN618-14_3.tif:0003-0860	0.826	180.145	0	829	34.171	62.026	0.806	148.747	28643	1.546	0.647	0.896	1.35947		361	CEP170_KAN618-14_3.tif:0004-1009	1.08	63.63	0	307	75.193	72.693	0.808	68.731	13235	1.412	0.708	0.879
357	CEP83_KAN618-14_3.tif:0004-1009	1.08	132.702	0	788	75.193	72.693	0.808	143.341	27602	1.412	0.708	0.879	1.31006		368	CEP170_KAN618-14_4.tif:0001-0145	0.997	112.177	0	356	78.476	10.478	0.899	111.85	21538	1.184	0.845	0.95
362	CEP83_KAN618-14_4.tif:0001-0145	0.997	117.094	0	628	78.476	10.478	0.899	116.752	22482	1.184	0.845	0.95	1.06705		369	CEP170_KAN618-14_4.tif:0002-0749	1.558	64.98	0	329	59.473	54.023	0.8	101.235	19494	1.643	0.609	0.922
363	CEP83_KAN618-14_4.tif:0002-0749	1.558	96.247	0	855	59.473	54.023	0.8	149.947	28874	1.643	0.609	0.922	1.37043		370	CEP170_KAN618-14_4.tif:0003-0849	0.763	64.551	0	194	9.492	61.236	0.789	49.278	9489	1.293	0.774	0.888
364	CEP83_KAN618-14_4.tif:0003-0849	0.763	104.796	0	510	9.492	61.236	0.789	80	15405	1.293	0.774	0.888	0.731158		371	CEP170_KAN618-14_4.tif:0004-1003	1.278	43.341	0	199	23.402	72.349	0.714	55.369	10662	2.101	0.476	0.911
365	CEP83_KAN618-14_4.tif:0004-1003	1.278	116.443	0	788	23.402	72.349	0.714	148.758	28645	2.101	0.476	0.911	1.35956		372	CEP170_KAN618-14_4.tif:0005-1020	1.298	59.932	0	314	77.991	73.534	0.792	77.809	14983	1.873	0.534	0.94
366	CEP83_KAN618-14_4.tif:0005-1020	1.298	77.556	0	528	77.991	73.534	0.792	100.69	19389	1.873	0.534	0.94	0.920249		373	CEP170_KAN618-14_4.tif:0006-1060	1.48	49.53	0	224	43.823	76.354	0.664	73.306	14116	1.774	0.564	0.857
367	CEP83_KAN618-14_4.tif:0006-1060	1.48	80.681	0	616	43.823	76.354	0.664	119.411	22994	1.774	0.564	0.857	1.09135		378	CEP170_KAN618-14_5.tif:0001-0405	0.846	71.988	0	229	87.76	29.148	0.818	60.936	11734	1.488	0.672	0.883
374	CEP83_KAN618-14_5.tif:0001-0405	0.846	93.196	0	374	87.76	29.148	0.818	78.889	15191	1.488	0.672	0.883	0.721001		379	CEP170_KAN618-14_5.tif:0002-0582	0.971	80.749	0	221	89.485	42.042	0.761	78.417	15100	1.558	0.642	0.919
375	CEP83_KAN618-14_5.tif:0002-0582	0.971	124.968	0	566	89.485	42.042	0.761	121.359	23369	1.558	0.642	0.919	1.10915		380	CEP170_KAN618-14_5.tif:0003-0642	1.007	86.263	0	362	16.48	46.289	0.817	86.907	16735	1.492	0.67	0.909
376	CEP83_KAN618-14_5.tif:0003-0642	1.007	137.861	0	699	16.48	46.289	0.817	138.891	26745	1.492	0.67	0.909	1.26938		381	CEP170_KAN618-14_5.tif:0004-0953	1.007	77.907	0	306	44.011	68.67	0.751	78.489	15114	1.266	0.79	0.876
377	CEP83_KAN618-14_5.tif:0004-0953	1.007	61.577	0	305	44.011	68.67	0.751	62.037	11946	1.266	0.79	0.876	0.566986		389	CEP170_KAN618-14_6.tif:0001-0074	1.231	118.646	0	461	75.465	5.358	0.804	146.026	28119	1.114	0.898	0.894
382	CEP83_KAN618-14_6.tif:0001-0074	1.231	74.422	0	518	75.465	5.358	0.804	91.597	17638	1.114	0.898	0.894	0.837142		390	CEP170_KAN618-14_6.tif:0002-0186	1.283	95.656	0	433	19.101	13.438	0.838	122.698	23627	1.305	0.766	0.908
383	CEP83_KAN618-14_6.tif:0002-0186	1.283	138.968	0	1067	19.101	13.438	0.838	178.255	34325	1.305	0.766	0.908	1.62915		391	CEP170_KAN618-14_6.tif:0003-0272	0.722	84.036	0	309	62.125	19.668	0.765	60.661	11681	1.779	0.562	0.871
384	CEP83_KAN618-14_6.tif:0003-0272	0.722	97.058	0	451	62.125	19.668	0.765	70.061	13491	1.779	0.562	0.871	0.640315		392	CEP170_KAN618-14_6.tif:0004-0557	0.919	69.825	0	210	39.918	40.179	0.918	64.182	12359	1.259	0.794	0.937
385	CEP83_KAN618-14_6.tif:0004-0557	0.919	124.492	0	557	39.918	40.179	0.918	114.431	22035	1.259	0.794	0.937	1.04583		393	CEP170_KAN618-14_6.tif:0005-0868	0.649	81.44	0	222	0.575	62.553	0.837	52.866	10180	1.262	0.793	0.933
386	CEP83_KAN618-14_6.tif:0005-0868	0.649	154.408	0	657	0.575	62.553	0.837	100.233	19301	1.262	0.793	0.933	0.916072		394	CEP170_KAN618-14_6.tif:0006-0874	1.303	91.04	0	356	84.717	62.984	0.783	118.669	22851	1.446	0.692	0.895
387	CEP83_KAN618-14_6.tif:0006-0874	1.303	132.618	0	916	84.717	62.984	0.783	172.864	33287	1.446	0.692	0.895	1.57988		395	CEP170_KAN618-14_6.tif:0007-1176	1.085	56	0	179	16.125	84.716	0.652	60.781	11704	1.651	0.606	0.796
388	CEP83_KAN618-14_6.tif:0007-1176	1.085	98.943	0	602	16.125	84.716	0.652	107.389	20679	1.651	0.606	0.796	0.981475		403	CEP170_KAN618-14_7.tif:0001-0047	0.898	67.202	0	260	62.07	3.453	0.81	60.376	11626	1.459	0.685	0.901
396	CEP83_KAN618-14_7.tif:0001-0047	0.898	133.821	0	728	62.07	3.453	0.81	120.227	23151	1.459	0.685	0.901	1.0988		404	CEP170_KAN618-14_7.tif:0002-0260	1.402	86.252	0	322	36.031	18.694	0.792	120.938	23288	1.599	0.625	0.911
397	CEP83_KAN618-14_7.tif:0002-0260	1.402	134.915	0	1023	36.031	18.694	0.792	189.171	36427	1.599	0.625	0.911	1.72891		405	CEP170_KAN618-14_7.tif:0003-0333	1.106	78.521	0	280	73.654	23.994	0.845	86.855	16725	1.321	0.757	0.906
398	CEP83_KAN618-14_7.tif:0003-0333	1.106	128.667	0	740	73.654	23.994	0.845	142.323	27406	1.321	0.757	0.906	1.30075		406	CEP170_KAN618-14_7.tif:0004-0578	0.836	62.839	0	234	58.35	41.7	0.824	52.539	10117	1.252	0.799	0.915
399	CEP83_KAN618-14_7.tif:0004-0578	0.836	166.571	0	830	58.35	41.7	0.824	139.27	26818	1.252	0.799	0.915	1.27285		407	CEP170_KAN618-14_7.tif:0005-0697	1.158	82.843	0	297	17.244	50.267	0.728	95.938	18474	1.26	0.794	0.863
400	CEP83_KAN618-14_7.tif:0005-0697	1.158	126.345	0	825	17.244	50.267	0.728	146.317	28175	1.26	0.794	0.863	1.33725		408	CEP170_KAN618-14_7.tif:0006-0874	1.262	84.432	0	339	41.019	62.99	0.739	106.548	20517	1.645	0.608	0.868
401	CEP83_KAN618-14_7.tif:0006-0874	1.262	126.239	0	830	41.019	62.99	0.739	159.305	30676	1.645	0.608	0.868	1.45596		409	CEP170_KAN618-14_7.tif:0007-1134	0.987	71.858	0	204	69.391	81.681	0.783	70.902	13653	1.506	0.664	0.886
402	CEP83_KAN618-14_7.tif:0007-1134	0.987	121.242	0	566	69.391	81.681	0.783	119.629	23036	1.506	0.664	0.886	1.09334		416	CEP170_KAN618-15_1.tif:0001-0259	0.789	95.803	0	269	84.914	18.714	0.866	75.623	14562	1.273	0.785	0.927
									AVERAGE	23510.7				1.11588
									S.E.M.	1109.58
410	CEP83_KAN618-15_1.tif:0001-0259	0.789	117.75	0	491	84.914	18.714	0.866	92.947	17898	1.273	0.785	0.927	0.849482		417	CEP170_KAN618-15_1.tif:0002-0337	1.075	89.845	0	439	38.861	24.393	0.757	96.582	18598	1.566	0.639	0.877
411	CEP83_KAN618-15_1.tif:0002-0337	1.075	54.763	0	306	38.861	24.393	0.757	58.87	11336	1.566	0.639	0.877	0.538034		418	CEP170_KAN618-15_1.tif:0003-0373	0.737	121.585	0	356	51.351	26.857	0.851	89.66	17265	1.603	0.624	0.919
412	CEP83_KAN618-15_1.tif:0003-0373	0.737	49.817	0	191	51.351	26.857	0.851	36.736	7074	1.603	0.624	0.919	0.335749		419	CEP170_KAN618-15_1.tif:0004-0618	1.163	113.911	0	498	79.994	44.525	0.878	132.508	25516	1.249	0.801	0.931
413	CEP83_KAN618-15_1.tif:0004-0618	1.163	121.469	0	530	79.994	44.525	0.878	141.3	27209	1.249	0.801	0.931	1.2914		420	CEP170_KAN618-15_1.tif:0005-0751	0.95	133.333	0	384	24.156	54.136	0.877	126.713	24400	1.433	0.698	0.936
414	CEP83_KAN618-15_1.tif:0005-0751	0.95	28.929	0	127	24.156	54.136	0.877	27.493	5294	1.433	0.698	0.936	0.251266		421	CEP170_KAN618-15_1.tif:0006-1078	1.387	78.682	0	380	74.871	77.657	0.653	109.098	21008	1.896	0.527	0.809
415	CEP83_KAN618-15_1.tif:0006-1078	1.387	90.375	0	688	74.871	77.657	0.653	125.311	24130	1.896	0.527	0.809	1.14527		427	CEP170_KAN618-15_2.tif:0001-0357	0.654	116.77	0	306	29.296	25.737	0.848	76.407	14713	1.271	0.787	0.9
422	CEP83_KAN618-15_2.tif:0001-0357	0.654	18.675	0	108	29.296	25.737	0.848	12.219	2353	1.271	0.787	0.9	0.111679		428	CEP170_KAN618-15_2.tif:0002-0626	1.433	112.178	0	533	15.397	45.112	0.848	160.785	30961	1.635	0.612	0.926
423	CEP83_KAN618-15_2.tif:0002-0626	1.433	81.79	0	617	15.397	45.112	0.848	117.23	22574	1.635	0.612	0.926	1.07142		429	CEP170_KAN618-15_2.tif:0003-0630	1.459	97.932	0	473	63.425	45.394	0.784	142.91	27519	1.497	0.668	0.893
424	CEP83_KAN618-15_2.tif:0003-0630	1.459	108.406	0	540	63.425	45.394	0.784	158.194	30462	1.497	0.668	0.893	1.4458		430	CEP170_KAN618-15_2.tif:0004-0922	0.971	71.444	0	279	78.549	66.491	0.83	69.38	13360	1.626	0.615	0.919
425	CEP83_KAN618-15_2.tif:0004-0922	0.971	122.513	0	743	78.549	66.491	0.83	118.975	22910	1.626	0.615	0.919	1.08736		431	CEP170_KAN618-15_2.tif:0005-1174	0.898	93.462	0	273	51.893	84.572	0.803	83.968	16169	1.319	0.758	0.869
426	CEP83_KAN618-15_2.tif:0005-1174	0.898	78.96	0	352	51.893	84.572	0.803	70.938	13660	1.319	0.758	0.869	0.648336		438	CEP170_KAN618-15_3.tif:0001-0148	1.433	82.855	0	452	42.561	10.577	0.736	118.757	22868	1.581	0.633	0.868
432	CEP83_KAN618-15_3.tif:0001-0148	1.433	72.348	0	493	42.561	10.577	0.736	103.697	19968	1.581	0.633	0.868	0.947729		439	CEP170_KAN618-15_3.tif:0002-0349	0.836	109.087	0	412	20.693	25.175	0.908	91.207	17563	1.254	0.797	0.936
433	CEP83_KAN618-15_3.tif:0002-0349	0.836	83.547	0	378	20.693	25.175	0.908	69.853	13451	1.254	0.797	0.936	0.638417		440	CEP170_KAN618-15_3.tif:0003-0530	1.376	78.457	0	351	84.004	38.283	0.732	107.971	20791	1.66	0.602	0.863
434	CEP83_KAN618-15_3.tif:0003-0530	1.376	134.189	0	875	84.004	38.283	0.732	184.668	35560	1.66	0.602	0.863	1.68776		441	CEP170_KAN618-15_3.tif:0004-0831	1.366	87.92	0	386	78.972	59.914	0.714	120.081	23123	1.788	0.559	0.878
435	CEP83_KAN618-15_3.tif:0004-0831	1.366	77.274	0	498	78.972	59.914	0.714	105.54	20323	1.788	0.559	0.878	0.964579		442	CEP170_KAN618-15_3.tif:0005-0839	0.945	114.995	0	357	31.047	60.45	0.8	108.687	20929	1.408	0.71	0.877
436	CEP83_KAN618-15_3.tif:0005-0839	0.945	16.731	0	143	31.047	60.45	0.8	15.813	3045	1.408	0.71	0.877	0.144523		443	CEP170_KAN618-15_3.tif:0006-0999	0.857	127.055	0	522	58.812	72.023	0.895	108.869	20964	1.338	0.747	0.968
437	CEP83_KAN618-15_3.tif:0006-0999	0.857	133.794	0	511	58.812	72.023	0.895	114.644	22076	1.338	0.747	0.968	1.04778		449	CEP170_KAN618-15_4.tif:0001-0496	0.904	133.753	0	380	64.287	35.797	0.826	120.86	23273	1.528	0.655	0.897
444	CEP83_KAN618-15_4.tif:0001-0496	0.904	61.121	0	250	64.287	35.797	0.826	55.229	10635	1.528	0.655	0.897	0.504763		450	CEP170_KAN618-15_4.tif:0002-0638	0.867	82.102	0	229	20.071	45.993	0.71	71.203	13711	1.764	0.567	0.872
445	CEP83_KAN618-15_4.tif:0002-0638	0.867	85.054	0	310	20.071	45.993	0.71	73.763	14204	1.764	0.567	0.872	0.674156		451	CEP170_KAN618-15_4.tif:0003-0743	0.836	130.876	0	411	89.738	53.585	0.917	109.425	21071	1.271	0.787	0.961
446	CEP83_KAN618-15_4.tif:0003-0743	0.836	90.441	0	272	89.738	53.585	0.917	75.617	14561	1.271	0.787	0.961	0.6911		452	CEP170_KAN618-15_4.tif:0004-0772	0.665	110.039	0	265	42.728	55.647	0.848	73.145	14085	1.391	0.719	0.924
447	CEP83_KAN618-15_4.tif:0004-0772	0.665	61.898	0	179	42.728	55.647	0.848	41.145	7923	1.391	0.719	0.924	0.376045		453	CEP170_KAN618-15_4.tif:0005-1105	1.106	91.789	0	358	81.06	79.615	0.835	101.531	19551	1.465	0.683	0.918
448	CEP83_KAN618-15_4.tif:0005-1105	1.106	84.141	0	482	81.06	79.615	0.835	93.072	17922	1.465	0.683	0.918	0.850621		460	CEP170_KAN618-15_5.tif:0001-0293	1.241	83.046	0	321	59.724	21.136	0.857	103.074	19848	1.327	0.754	0.93
454	CEP83_KAN618-15_5.tif:0001-0293	1.241	97.987	0	698	59.724	21.136	0.857	121.618	23419	1.327	0.754	0.93	1.11152		461	CEP170_KAN618-15_5.tif:0002-0499	1.039	90.07	0	323	53.271	35.914	0.703	93.549	18014	1.755	0.57	0.853
455	CEP83_KAN618-15_5.tif:0002-0499	1.039	80.265	0	529	53.271	35.914	0.703	83.366	16053	1.755	0.57	0.853	0.761914		462	CEP170_KAN618-15_5.tif:0003-0601	1.096	73.09	0	441	37.311	43.335	0.791	80.089	15422	1.841	0.543	0.984
456	CEP83_KAN618-15_5.tif:0003-0601	1.096	77.246	0	365	37.311	43.335	0.791	84.643	16299	1.841	0.543	0.984	0.77359		463	CEP170_KAN618-15_5.tif:0004-1035	1.163	106.763	0	429	46.486	74.566	0.881	124.194	23915	1.466	0.682	0.918
457	CEP83_KAN618-15_5.tif:0004-1035	1.163	94.259	0	523	46.486	74.566	0.881	109.648	21114	1.466	0.682	0.918	1.00212		464	CEP170_KAN618-15_5.tif:0005-1121	0.966	69.462	0	333	16.151	80.777	0.833	67.095	12920	1.71	0.585	0.942
458	CEP83_KAN618-15_5.tif:0005-1121	0.966	83.328	0	319	16.151	80.777	0.833	80.489	15499	1.71	0.585	0.942	0.73562		465	CEP170_KAN618-15_5.tif:0006-1263	1.262	78.638	0	371	2.618	91.009	0.785	99.236	19109	1.324	0.755	0.905
459	CEP83_KAN618-15_5.tif:0006-1263	1.262	85.053	0	563	2.618	91.009	0.785	107.332	20668	1.324	0.755	0.905	0.980953		473	CEP170_KAN618-15_6.tif:0001-0332	1.272	58.51	0	265	11.919	23.928	0.751	74.444	14335	1.538	0.65	0.873
466	CEP83_KAN618-15_6.tif:0001-0332	1.272	80.527	0	610	11.919	23.928	0.751	102.456	19729	1.538	0.65	0.873	0.936386		474	CEP170_KAN618-15_6.tif:0002-0380	0.935	93.428	0	292	33.682	27.399	0.824	87.333	16817	1.621	0.617	0.928
467	CEP83_KAN618-15_6.tif:0002-0380	0.935	87.956	0	407	33.682	27.399	0.824	82.218	15832	1.621	0.617	0.928	0.751425		475	CEP170_KAN618-15_6.tif:0003-0616	0.872	108.095	0	311	36.915	44.36	0.78	94.308	18160	1.296	0.772	0.868
468	CEP83_KAN618-15_6.tif:0003-0616	0.872	61.25	0	428	36.915	44.36	0.78	53.437	10290	1.296	0.772	0.868	0.488388		476	CEP170_KAN618-15_6.tif:0004-0670	1.023	113.076	0	382	83.623	48.3	0.874	115.683	22276	1.49	0.671	0.943
469	CEP83_KAN618-15_6.tif:0004-0670	1.023	206.838	0	1177	83.623	48.3	0.874	211.605	40747	1.49	0.671	0.943	1.93395		477	CEP170_KAN618-15_6.tif:0005-0755	0.696	167.381	0	567	23.912	54.418	0.912	116.477	22429	1.203	0.831	0.94
470	CEP83_KAN618-15_6.tif:0005-0755	0.696	27.575	0	161	23.912	54.418	0.912	19.189	3695	1.203	0.831	0.94	0.175374		478	CEP170_KAN618-15_6.tif:0006-0777	1.148	111.633	0	600	68.724	56.068	0.866	128.12	24671	1.317	0.759	0.936
471	CEP83_KAN618-15_6.tif:0006-0777	1.148	91.176	0	455	68.724	56.068	0.866	104.642	20150	1.317	0.759	0.936	0.956368		479	CEP170_KAN618-15_6.tif:0007-1106	1.132	45.174	0	182	55.369	79.721	0.76	51.142	9848	1.671	0.599	0.865
472	CEP83_KAN618-15_6.tif:0007-1106	1.132	113.729	0	721	55.369	79.721	0.76	128.754	24793	1.671	0.599	0.865	1.17674		489	CEP170_KAN618-16_1.tif:0001-0242	0.665	100.852	0	226	11.013	17.436	0.871	67.038	12909	1.382	0.724	0.928
									AVERAGE	17510.2				0.831075
									S.E.M.	1467.55
480	CEP83_KAN618-16_1.tif:0001-0242	0.665	48.258	0	331	11.013	17.436	0.871	32.078	6177	1.382	0.724	0.928	0.293175		490	CEP170_KAN618-16_1.tif:0002-0279	0.872	54.964	0	237	80.338	20.158	0.739	47.954	9234	1.945	0.514	0.868
481	CEP83_KAN618-16_1.tif:0002-0279	0.872	115.286	0	608	80.338	20.158	0.739	100.581	19368	1.945	0.514	0.868	0.919252		491	CEP170_KAN618-16_1.tif:0003-0499	0.961	62.178	0	269	70.494	35.952	0.769	59.737	11503	1.36	0.735	0.892
482	CEP83_KAN618-16_1.tif:0003-0499	0.961	91.941	0	410	70.494	35.952	0.769	88.33	17009	1.36	0.735	0.892	0.807288		492	CEP170_KAN618-16_1.tif:0004-0601	1.215	70.778	0	336	47.747	43.381	0.75	86.009	16562	1.353	0.739	0.867
483	CEP83_KAN618-16_1.tif:0004-0601	1.215	96.603	0	766	47.747	43.381	0.75	117.391	22605	1.353	0.739	0.867	1.07289		493	CEP170_KAN618-16_1.tif:0005-0612	1.454	79.557	0	417	63.97	44.141	0.755	115.683	22276	1.864	0.537	0.886
484	CEP83_KAN618-16_1.tif:0005-0612	1.454	92.975	0	652	63.97	44.141	0.755	135.193	26033	1.864	0.537	0.886	1.23559		494	CEP170_KAN618-16_1.tif:0006-0706	1.501	96.99	0	467	80.489	50.987	0.768	145.564	28030	1.245	0.803	0.865
485	CEP83_KAN618-16_1.tif:0006-0706	1.501	118.118	0	853	80.489	50.987	0.768	177.273	34136	1.245	0.803	0.865	1.62018		495	CEP170_KAN618-16_1.tif:0007-0893	1.148	75.036	0	326	15.503	64.396	0.808	86.118	16583	1.545	0.647	0.908
486	CEP83_KAN618-16_1.tif:0007-0893	1.148	66.199	0	325	15.503	64.396	0.808	75.976	14630	1.545	0.647	0.908	0.694375		496	CEP170_KAN618-16_1.tif:0008-1007	1.096	82.336	0	243	67.193	72.565	0.689	90.221	17373	1.895	0.528	0.851
487	CEP83_KAN618-16_1.tif:0008-1007	1.096	84.076	0	463	67.193	72.565	0.689	92.126	17740	1.895	0.528	0.851	0.841983		497	CEP170_KAN618-16_1.tif:0009-1243	0.737	67.232	0	284	45.458	89.584	0.809	49.579	9547	1.51	0.662	0.899
488	CEP83_KAN618-16_1.tif:0009-1243	0.737	122.401	0	462	45.458	89.584	0.809	90.262	17381	1.51	0.662	0.899	0.824944		504	CEP170_KAN618-16_2.tif:0001-0383	0.535	100.592	0	235	6.838	27.59	0.947	53.806	10361	1.317	0.76	0.949
498	CEP83_KAN618-16_2.tif:0001-0383	0.535	55.262	0	147	6.838	27.59	0.947	29.559	5692	1.317	0.76	0.949	0.270156		505	CEP170_KAN618-16_2.tif:0002-0424	0.685	63.371	0	175	53.499	30.596	0.76	43.441	8365	1.491	0.671	0.88
499	CEP83_KAN618-16_2.tif:0002-0424	0.685	103.591	0	450	53.499	30.596	0.76	71.011	13674	1.491	0.671	0.88	0.649001		506	CEP170_KAN618-16_2.tif:0003-0680	0.857	91.994	0	339	19.425	48.992	0.856	78.827	15179	1.348	0.742	0.93
500	CEP83_KAN618-16_2.tif:0003-0680	0.857	192.382	0	912	19.425	48.992	0.856	164.846	31743	1.348	0.742	0.93	1.5066		507	CEP170_KAN618-16_2.tif:0004-0693	0.831	116.969	0	427	67.613	49.944	0.934	97.19	18715	1.063	0.941	0.944
501	CEP83_KAN618-16_2.tif:0004-0693	0.831	136.469	0	540	67.613	49.944	0.934	113.392	21835	1.063	0.941	0.944	1.03634		508	CEP170_KAN618-16_2.tif:0005-0942	0.836	91.708	0	367	28.231	67.89	0.864	76.677	14765	1.429	0.7	0.925
502	CEP83_KAN618-16_2.tif:0005-0942	0.836	80.969	0	356	28.231	67.89	0.864	67.698	13036	1.429	0.7	0.925	0.61872		509	CEP170_KAN618-16_2.tif:0006-1013	1.418	81.495	0	482	78.066	73.088	0.828	115.537	22248	1.146	0.873	0.929
503	CEP83_KAN618-16_2.tif:0006-1013	1.418	140.791	0	840	78.066	73.088	0.828	199.604	38436	1.146	0.873	0.929	1.82427		517	CEP170_KAN618-16_3.tif:0001-0293	1.08	80.029	0	300	71.068	21.085	0.782	86.445	16646	1.396	0.717	0.9
510	CEP83_KAN618-16_3.tif:0001-0293	1.08	89.889	0	521	71.068	21.085	0.782	97.096	18697	1.396	0.717	0.9	0.887405		518	CEP170_KAN618-16_3.tif:0002-0385	0.649	41.752	0	169	60.997	27.776	0.936	27.103	5219	1.322	0.757	0.954
511	CEP83_KAN618-16_3.tif:0002-0385	0.649	179.88	0	586	60.997	27.776	0.936	116.768	22485	1.322	0.757	0.954	1.06719		519	CEP170_KAN618-16_3.tif:0003-0471	0.867	87.443	0	330	78	33.946	0.887	75.836	14603	1.183	0.845	0.905
512	CEP83_KAN618-16_3.tif:0003-0471	0.867	196.856	0	942	78	33.946	0.887	170.725	32875	1.183	0.845	0.905	1.56033		520	CEP170_KAN618-16_3.tif:0004-0711	0.883	66.747	0	216	46.142	51.32	0.678	58.927	11347	1.849	0.541	0.872
513	CEP83_KAN618-16_3.tif:0004-0711	0.883	97.529	0	429	46.142	51.32	0.678	86.102	16580	1.849	0.541	0.872	0.786927		521	CEP170_KAN618-16_3.tif:0005-0919	0.815	84.013	0	261	15.546	66.317	0.767	68.498	13190	1.231	0.813	0.902
514	CEP83_KAN618-16_3.tif:0005-0919	0.815	72.057	0	323	15.546	66.317	0.767	58.75	11313	1.231	0.813	0.902	0.536942		522	CEP170_KAN618-16_3.tif:0006-1058	0.852	75.506	0	301	64.123	76.306	0.889	64.307	12383	1.046	0.956	0.953
515	CEP83_KAN618-16_3.tif:0006-1058	0.852	124.433	0	559	64.123	76.306	0.889	105.977	20407	1.046	0.956	0.953	0.968565		523	CEP170_KAN618-16_3.tif:0007-1123	1.044	83.562	0	305	40.103	80.936	0.829	87.224	16796	1.377	0.726	0.907
516	CEP83_KAN618-16_3.tif:0007-1123	1.044	104.358	0	601	40.103	80.936	0.829	108.931	20976	1.377	0.726	0.907	0.995571		534	CEP170_KAN618-16_4.tif:0001-0169	0.836	80.441	0	241	55.008	12.207	0.816	67.256	12951	1.592	0.628	0.936
524	CEP83_KAN618-16_4.tif:0001-0169	0.836	152.621	0	583	55.008	12.207	0.816	127.606	24572	1.592	0.628	0.936	1.16625		535	CEP170_KAN618-16_4.tif:0002-0272	0.628	121.992	0	294	36.652	19.648	0.88	76.656	14761	1.685	0.594	0.953
525	CEP83_KAN618-16_4.tif:0002-0272	0.628	28.95	0	127	36.652	19.648	0.88	18.192	3503	1.685	0.594	0.953	0.166261		536	CEP170_KAN618-16_4.tif:0003-0313	0.556	127.673	0	354	21.98	22.541	0.953	70.944	13661	1.175	0.851	0.951
526	CEP83_KAN618-16_4.tif:0003-0313	0.556	18.972	0	80	21.98	22.541	0.953	10.542	2030	1.175	0.851	0.951	0.0963487		537	CEP170_KAN618-16_4.tif:0004-0405	1.194	75.765	0	341	78.984	29.161	0.718	90.496	17426	1.848	0.541	0.857
527	CEP83_KAN618-16_4.tif:0004-0405	1.194	122.865	0	734	78.984	29.161	0.718	146.753	28259	1.848	0.541	0.857	1.34124		538	CEP170_KAN618-16_4.tif:0005-0481	0.769	113.885	0	279	90.952	34.69	0.864	87.53	16855	1.374	0.728	0.934
528	CEP83_KAN618-16_4.tif:0005-0481	0.769	47.622	0	202	90.952	34.69	0.864	36.601	7048	1.374	0.728	0.934	0.334515		539	CEP170_KAN618-16_4.tif:0006-0601	0.898	102.867	0	321	46.853	43.347	0.91	92.417	17796	1.261	0.793	0.933
529	CEP83_KAN618-16_4.tif:0006-0601	0.898	163.266	0	709	46.853	43.347	0.91	146.68	28245	1.261	0.793	0.933	1.34058		540	CEP170_KAN618-16_4.tif:0007-0614	1.127	70.47	0	278	62.008	44.279	0.793	79.414	15292	1.579	0.633	0.897
530	CEP83_KAN618-16_4.tif:0007-0614	1.127	126.364	0	761	62.008	44.279	0.793	142.401	27421	1.579	0.633	0.897	1.30147		541	CEP170_KAN618-16_4.tif:0008-0820	1.122	86.093	0	319	17.501	59.076	0.875	96.572	18596	1.153	0.868	0.896
531	CEP83_KAN618-16_4.tif:0008-0820	1.122	107.713	0	715	17.501	59.076	0.875	120.824	23266	1.153	0.868	0.896	1.10426		542	CEP170_KAN618-16_4.tif:0009-0847	1.158	56.852	0	231	85.37	61.101	0.756	65.839	12678	1.604	0.623	0.866
532	CEP83_KAN618-16_4.tif:0009-0847	1.158	146.682	0	962	85.37	61.101	0.756	169.868	32710	1.604	0.623	0.866	1.5525		543	CEP170_KAN618-16_4.tif:0010-1068	1.153	112.306	0	370	60.366	76.994	0.845	129.476	24932	1.265	0.791	0.933
533	CEP83_KAN618-16_4.tif:0010-1068	1.153	138.797	0	761	60.366	76.994	0.845	160.016	30813	1.265	0.791	0.933	1.46246		550	CEP170_KAN618-16_5.tif:0001-0105	1.158	81.749	0	391	17.369	7.622	0.754	94.671	18230	1.651	0.606	0.901
544	CEP83_KAN618-16_5.tif:0001-0105	1.158	118.43	0	793	17.369	7.622	0.754	137.151	26410	1.651	0.606	0.901	1.25348		551	CEP170_KAN618-16_5.tif:0002-0398	1.08	74.981	0	225	38.369	28.712	0.839	80.992	15596	1.145	0.873	0.906
545	CEP83_KAN618-16_5.tif:0002-0398	1.08	83.981	0	473	38.369	28.712	0.839	90.714	17468	1.145	0.873	0.906	0.829073		552	CEP170_KAN618-16_5.tif:0003-0488	0.914	67.381	0	299	48.674	35.181	0.781	61.586	11859	1.555	0.643	0.869
546	CEP83_KAN618-16_5.tif:0003-0488	0.914	93.926	0	357	48.674	35.181	0.781	85.848	16531	1.555	0.643	0.869	0.784601		553	CEP170_KAN618-16_5.tif:0004-0820	0.685	114.644	0	288	67.398	59.081	0.884	78.588	15133	1.409	0.71	0.981
547	CEP83_KAN618-16_5.tif:0004-0820	0.685	37.197	0	121	67.398	59.081	0.884	25.498	4910	1.409	0.71	0.981	0.23304		554	CEP170_KAN618-16_5.tif:0005-1036	0.753	69.048	0	180	48.935	74.723	0.718	51.994	10012	1.435	0.697	0.829
548	CEP83_KAN618-16_5.tif:0005-1036	0.753	144.938	0	544	48.935	74.723	0.718	109.139	21016	1.435	0.697	0.829	0.99747		555	CEP170_KAN618-16_5.tif:0006-1179	0.924	56.354	0	214	16.09	84.955	0.805	52.092	10031	1.925	0.519	0.97
549	CEP83_KAN618-16_5.tif:0006-1179	0.924	90.022	0	484	16.09	84.955	0.805	83.215	16024	1.925	0.519	0.97	0.760538		567	CEP170_KAN618-16_6.tif:0001-0033	1.049	81.005	0	327	47.376	2.36	0.851	84.975	16363	1.321	0.757	0.914
556	CEP83_KAN618-16_6.tif:0001-0033	1.049	160.822	0	730	47.376	2.36	0.851	168.705	32486	1.321	0.757	0.914	1.54186		568	CEP170_KAN618-16_6.tif:0002-0090	1.075	63.754	0	254	8.213	6.537	0.846	68.534	13197	1.448	0.691	0.914
557	CEP83_KAN618-16_6.tif:0002-0090	1.075	129.362	0	791	8.213	6.537	0.846	139.062	26778	1.448	0.691	0.914	1.27095		569	CEP170_KAN618-16_6.tif:0003-0176	1.361	158.832	0	750	27.992	12.739	0.791	216.108	41614	1.72	0.581	0.907
558	CEP83_KAN618-16_6.tif:0003-0176	1.361	80.221	0	652	27.992	12.739	0.791	109.15	21018	1.72	0.581	0.907	0.997565		570	CEP170_KAN618-16_6.tif:0004-0234	1.059	53.25	0	218	75.074	16.957	0.697	56.413	10863	1.473	0.679	0.826
559	CEP83_KAN618-16_6.tif:0004-0234	1.059	108.358	0	657	75.074	16.957	0.697	114.795	22105	1.473	0.679	0.826	1.04916		571	CEP170_KAN618-16_6.tif:0005-0458	0.711	64.073	0	211	55.497	33.001	0.851	45.585	8778	1.483	0.675	0.932
560	CEP83_KAN618-16_6.tif:0005-0458	0.711	121.036	0	504	55.497	33.001	0.851	86.113	16582	1.483	0.675	0.932	0.787022		572	CEP170_KAN618-16_6.tif:0006-0601	0.634	83.385	0	277	8.355	43.302	0.863	52.83	10173	1.514	0.66	0.938
561	CEP83_KAN618-16_6.tif:0006-0601	0.634	92.697	0	337	8.355	43.302	0.863	58.729	11309	1.514	0.66	0.938	0.536752		573	CEP170_KAN618-16_6.tif:0007-0659	1.423	90.277	0	347	73.15	47.516	0.858	128.458	24736	1.498	0.667	0.918
562	CEP83_KAN618-16_6.tif:0007-0659	1.423	143.818	0	985	73.15	47.516	0.858	204.641	39406	1.498	0.667	0.918	1.8703		574	CEP170_KAN618-16_6.tif:0008-0702	0.982	85.344	0	271	80.096	50.615	0.846	83.765	16130	1.373	0.728	0.938
563	CEP83_KAN618-16_6.tif:0008-0702	0.982	194.042	0	1188	80.096	50.615	0.846	190.453	36674	1.373	0.728	0.938	1.74064		575	CEP170_KAN618-16_6.tif:0009-0753	1.21	64.03	0	293	52.69	54.246	0.819	77.477	14919	1.295	0.772	0.917
564	CEP83_KAN618-16_6.tif:0009-0753	1.21	105.498	0	654	52.69	54.246	0.819	127.653	24581	1.295	0.772	0.917	1.16667		576	CEP170_KAN618-16_6.tif:0010-0940	1.101	67.901	0	285	23.568	67.714	0.856	74.755	14395	1.403	0.713	0.932
565	CEP83_KAN618-16_6.tif:0010-0940	1.101	116.363	0	710	23.568	67.714	0.856	128.11	24669	1.403	0.713	0.932	1.17085		577	CEP170_KAN618-16_6.tif:0011-1185	1.444	87.881	0	342	66.242	85.437	0.854	126.874	24431	1.276	0.784	0.904
566	CEP83_KAN618-16_6.tif:0011-1185	1.444	85.374	0	628	66.242	85.437	0.854	123.254	23734	1.276	0.784	0.904	1.12647		673	CEP170_KAN618-2_1.tif:0001-0051	1.205	58.703	0	221	23.89	3.69	0.724	70.725	13619	1.918	0.521	0.869
									AVERAGE	21069.3				1
									S.E.M.	1310.38

## Sheet: IF condition
Exp. number	Cell line	Gene induced	Culture condition, fixation condition	rabbit-Alexa488	mouse IgG1-Alexa568	mouse IgG2b-Alexa647	Nuclear stain	Replicate	Date
KAN618-1	RPE-BFP-Cas9 pMCB306 (pool)		serum starved for 24 hours, fixed in 4% PFA at RT for 15 mintues	CEP83 antibody, Proteintech, 26013-1-AP, 1:1000	CEP170, Invitrogen, 41-3200, 1:1000	Ac-Tub, 6B-11, Santa Cruz, 1:1000	DAPI	No.6	2021-03-03
KAN618-2	RPE-BFP-Cas9 CEP164KO (pool)		serum starved for 24 hours, fixed in 4% PFA at RT for 15 mintues	CEP83 antibody, Proteintech, 26013-1-AP, 1:1000	CEP170, Invitrogen, 41-3200, 1:1000	Ac-Tub, 6B-11, Santa Cruz, 1:1000	DAPI	No.6	2021-03-03
KAN618-3	RPE-BFP-Cas9 CEP83 KO (pool)		serum starved for 24 hours, fixed in 4% PFA at RT for 15 mintues	CEP83 antibody, Proteintech, 26013-1-AP, 1:1000	CEP170, Invitrogen, 41-3200, 1:1000	Ac-Tub, 6B-11, Santa Cruz, 1:1000	DAPI	No.6	2021-03-03
KAN618-4	RPE-BFP-Cas9 SCLT1 KO (pool)		serum starved for 24 hours, fixed in 4% PFA at RT for 15 mintues	CEP83 antibody, Proteintech, 26013-1-AP, 1:1000	CEP170, Invitrogen, 41-3200, 1:1000	Ac-Tub, 6B-11, Santa Cruz, 1:1000	DAPI	No.6	2021-03-03
KAN618-5	RPE-BFP-Cas9 FBF1 KO (pool)		serum starved for 24 hours, fixed in 4% PFA at RT for 15 mintues	CEP83 antibody, Proteintech, 26013-1-AP, 1:1000	CEP170, Invitrogen, 41-3200, 1:1000	Ac-Tub, 6B-11, Santa Cruz, 1:1000	DAPI	No.6	2021-03-03
KAN618-6	RPE-BFP-Cas9 CEP89KO (pool)		serum starved for 24 hours, fixed in 4% PFA at RT for 15 mintues	CEP83 antibody, Proteintech, 26013-1-AP, 1:1000	CEP170, Invitrogen, 41-3200, 1:1000	Ac-Tub, 6B-11, Santa Cruz, 1:1000	DAPI	No.6	2021-03-03
KAN618-7	RPE-BFP-Cas9 CCDC92 KO (pool)		serum starved for 24 hours, fixed in 4% PFA at RT for 15 mintues	CEP83 antibody, Proteintech, 26013-1-AP, 1:1000	CEP170, Invitrogen, 41-3200, 1:1000	Ac-Tub, 6B-11, Santa Cruz, 1:1000	DAPI	No.6	2021-03-03
KAN618-8	RPE-BFP-Cas9 ANKRD26 KO (pool)		serum starved for 24 hours, fixed in 4% PFA at RT for 15 mintues	CEP83 antibody, Proteintech, 26013-1-AP, 1:1000	CEP170, Invitrogen, 41-3200, 1:1000	Ac-Tub, 6B-11, Santa Cruz, 1:1000	DAPI	No.6	2021-03-03
KAN618-9	RPE-BFP-Cas9 TTBK2 KO (pool)		serum starved for 24 hours, fixed in 4% PFA at RT for 15 mintues	CEP83 antibody, Proteintech, 26013-1-AP, 1:1000	CEP170, Invitrogen, 41-3200, 1:1000	Ac-Tub, 6B-11, Santa Cruz, 1:1000	DAPI	No.6	2021-03-03
KAN618-10	RPE-BFP-Cas9 INPP5E KO (pool)		serum starved for 24 hours, fixed in 4% PFA at RT for 15 mintues	CEP83 antibody, Proteintech, 26013-1-AP, 1:1000	CEP170, Invitrogen, 41-3200, 1:1000	Ac-Tub, 6B-11, Santa Cruz, 1:1000	DAPI	No.6	2021-03-03
KAN618-11	RPE-BFP-Cas9 Kiz KO (pool)		serum starved for 24 hours, fixed in 4% PFA at RT for 15 mintues	CEP83 antibody, Proteintech, 26013-1-AP, 1:1000	CEP170, Invitrogen, 41-3200, 1:1000	Ac-Tub, 6B-11, Santa Cruz, 1:1000	DAPI	No.6	2021-03-03
KAN618-12	RPE-BFP-Cas9 LRRC45 KO (pool)		serum starved for 24 hours, fixed in 4% PFA at RT for 15 mintues	CEP83 antibody, Proteintech, 26013-1-AP, 1:1000	CEP170, Invitrogen, 41-3200, 1:1000	Ac-Tub, 6B-11, Santa Cruz, 1:1000	DAPI	No.6	2021-03-03
KAN618-13	RPE-BFP-Cas9 NCS1 KO (pool)		serum starved for 24 hours, fixed in 4% PFA at RT for 15 mintues	CEP83 antibody, Proteintech, 26013-1-AP, 1:1000	CEP170, Invitrogen, 41-3200, 1:1000	Ac-Tub, 6B-11, Santa Cruz, 1:1000	DAPI	No.6	2021-03-03
KAN618-14	RPE-BFP-Cas9 C3orf14 KO (pool)		serum starved for 24 hours, fixed in 4% PFA at RT for 15 mintues	CEP83 antibody, Proteintech, 26013-1-AP, 1:1000	CEP170, Invitrogen, 41-3200, 1:1000	Ac-Tub, 6B-11, Santa Cruz, 1:1000	DAPI	No.6	2021-03-03
KAN618-15	RPE-BFP-Cas9 FOP KO (pool)		serum starved for 24 hours, fixed in 4% PFA at RT for 15 mintues	CEP83 antibody, Proteintech, 26013-1-AP, 1:1000	CEP170, Invitrogen, 41-3200, 1:1000	Ac-Tub, 6B-11, Santa Cruz, 1:1000	DAPI	No.6	2021-03-03
KAN618-16	RPE-BFP-Cas9 sgSafe (pool)		serum starved for 24 hours, fixed in 4% PFA at RT for 15 mintues	CEP83 antibody, Proteintech, 26013-1-AP, 1:1000	CEP170, Invitrogen, 41-3200, 1:1000	Ac-Tub, 6B-11, Santa Cruz, 1:1000	DAPI	No.6	2021-03-03

## Sheet: After ROUT
sgSafe	CEP164KO	CEP83KO	SCLT1KO	FBF1KO	CEP89KO	CCDC92KO	ANKRD26KO	TTBK2KO	INPP5EKO	KIZ KO	LRRC45 KO	NCS1 KO	C3orf14 KO
0.293175	1.18072	0.143621	0.335512	1.19539	1.18879	1.26881	0.159236	0.628924	0.629636	0.342441	0.667037	0.964056	1.5833
0.919252	0.184154	0.245238	0.106268	1.07934	1.24366	0.288382	0.141296	0.421941	1.36426	0.784126	0.944692	1.00782	1.18238
0.807288	1.05998	0.106316	0.343675	0.346096	0.737518	0.798413	0.0971555	0.862629	0.73581	0.781516	0.60937	1.25125	0.783937
1.07289	0.48649	0.173712	0.421561	0.818584	1.66474	0.919394	0.251503	0.346523	1.05106	0.807858	1.01389	0.811227	1.21732
1.23559	0.588914	0.100003	0.266501	1.46792	0.705339	1.11019	0.205607	0.263369	0.845733	1.30308	1.12576	0.505854	1.34091
1.62018	0.0908905	0.172241	0.332617	0.781563	0.874352	0.724751	0.142435	0.559297	0.745919	1.14764	0.986743	1.03876	0.491805
0.694375	0.740319	0.162654	0.27756	0.561101	1.07056	1.09833	0.336224	0.518479	0.981523	0.924188	0.717679	1.16131	0.933348
0.841983	1.58577	0.186242	0.200149	1.60447	0.78294	0.764809	0.239258	0.365935	1.1437	1.68624	1.27593	1.04123	0.965433
0.824944	1.24907	0.248466	0.356253	1.08566	1.1979	0.973027	0.256867	0.623609	0.869796	0.954944	0.476712	1.27892	0.76367
0.270156	1.03762	0.485113	0.244336	1.21077	0.940657	0.0661626	0.27832	0.559439	0.868799	0.41933	0.811322	0.703013	1.35947
0.649001	0.470922	0.178743	0.246045	0.671024	1.04265	0.137973	0.171197	0.528589	0.773827	1.30455	0.916926	1.00193	1.31006
1.5066	0.282828	1.32624	0.397972	0.434566	0.364084	0.971081	0.194786	0.542021	0.798128	1.21556	0.954422	1.81335	1.06705
1.03634	0.59404	0.22763	0.343058	0.392941	0.813885	1.39952	0.274902	0.659205	1.03943	1.10991	1.05025	1.09762	1.37043
0.61872	0.201193	0.12027	0.293175	1.11285	0.767847	0.987835	0.090938	0.581604	1.10943	1.08865	1.40346	0.62769	0.731158
1.82427	0.948774	0.645821	0.367027	0.765664	1.29615	1.84202	0.408224	0.805579	0.88731	1.4841	0.342156	0.94716	1.35956
0.887405	0.642499	0.140394	0.318852	1.65952	1.02158	1.19012	0.173855	0.261233	0.721144	1.10051	0.759873	1.30313	0.920249
1.06719	0.462331	0.17039	0.454073	0.717489	0.554788	1.09078	0.324548	1.48163	1.11964	0.319327	1.05874	0.965575	1.09135
1.56033	0.857219	0.261375	0.210638	1.20944	1.68411	1.36734	0.316859	0.888306	0.569739	0.597504	0.71075	1.09135	0.721001
0.786927	0.718913	0.268115	0.276469	0.380459	1.31694	0.115666	0.355541	1.26174	0.811892	1.15039	1.0054	1.37731	1.10915
0.536942	0.723042	0.376709	0.460243	2.18768	1.25358	0.971793	0.278842	0.714547	0.157006	0.542211	1.16093	2.54797	1.26938
0.968565	0.91593	0.169298	0.259524	0.132088	0.169488	0.3161	0.27756	0.303475	0.788825	0.855985	1.02761	1.05675	0.566986
0.995571	0.221127	0.230857	0.307889	1.17678	1.25324	0.530392	0.188236	1.02528	1.14261	0.586351	1.20697	0.23641	0.837142
1.16625	0.81137	0.237739	0.292606	1.35387	0.67857	0.687446	0.157101	0.790486	1.24399	1.54447	0.880997	1.42658	1.62915
0.166261	1.79441	0.155914	0.227867	1.35311	0.96268	1.24219	0.144381	0.959453	0.935484	0.810563	1.02557	1.43014	0.640315
0.0963487	1.03591	0.119226	0.267735	1.3439	1.06667	0.797463	0.240682	0.613214	0.519856	1.82094	0.958741	0.373007	1.04583
1.34124	0.211777	0.460243	0.111489	0.254493	0.149839	0.0910329	0.168302	0.48293	0.31292	0.938237	1.08043	0.758354	0.916072
0.334515	0.0997185	0.126772	0.406088	1.25889	0.978912	1.17194	0.202142	0.738895	1.8517	0.922669	1.06639	1.73755	1.57988
1.34058	0.7575	0.24277	0.216476	1.33512	1.32615	1.07536	0.148605	0.1543	1.06833	0.654174	1.11076	0.873593	0.981475
1.30147	0.754368	0.166925	0.333376	1.78705	0.735335	0.867708		0.271105	1.48358	0.123829	0.733864	1.38642	1.0988
1.10426	0.742265	0.194976	0.206272	1.45852	1.371	0.738468		0.565562	1.1409	0.837522		1.6516	1.72891
1.5525	0.1487	0.117185	0.174377	1.37223	0.535234	0.632816		0.69765	2.17155	1.03074		0.291799	1.30075
1.46246	0.850574	0.134271	0.0869511	1.31599	1.15224	0.65332		0.556687	0.998562	1.44879		0.768844	1.27285
1.25348	0.489337	0.205465	0.948774	1.111	1.25832	0.76647		0.261423	0.722046	0.0965385		1.01683	1.33725
0.829073	0.504858	0.131471	0.40101		1.55686	0.906912		0.21809	1.30768	0.52446		1.16829	1.45596
0.784601	0.604861	0.306275	0.406753		0.206936	0.27177		0.247991	1.26649	0.720195			1.09334
0.23304	0.081398	0.235936			0.775441	0.70439		0.761819	0.866616	0.840322
0.99747	0.663809	0.121361			1.13601	0.532054		0.230383	0.947112	0.229955
0.760538	0.760443	0.046703			1.34689	0.98437		0.64397	0.588107	0.989354
1.54186	0.456066	0.151263			1.01517			0.206604	0.976302	1.55183
1.27095	0.164979	0.105651			1.75749			0.897134	0.619622	1.31808
0.997565	0.888639	0.119273			0.956273			0.407512	0.903162	1.27394
1.04916	0.0900362	0.158287							1.01892	1.90191
0.787022		0.185008							1.35149	1.45861
0.536752		0.143859							0.54971	0.888639
1.8703		0.0966809							0.117659	1.32553
1.74064		0.0525883							0.979482	1.02106
1.16667		0.0617486								1.09875
1.17085										1.67879
1.12647										1.26122
										0.832253
										1.02073
										1.21357
										0.979149
										0.501962
										1.19183
										1.21613
										1.14864
										1.29373
										0.875397
										0.721856
