# Supplementary material for: A hierarchical pathway for assembly of the distal appendages that organize primary cilia
Source: eLife. 2025 Jan 30;14:e85999. doi: 10.7554/eLife.85999 (PMC11984956; doi:10.7554/eLife.85999)
Supplement: Figure 2—source data 4. [file elife-85999-fig2-data4.xlsx]

## Sheet: Raw data
	Label	Area	Mean	Min	Max	X	Y	Circ	IntDen	RawIntDen	AR	Round	Solidity	SCLT1/CEP170			Label	Area	Mean	Min	Max	X	Y	Circ	IntDen	RawIntDen	AR	Round	Solidity
801	SCLT1_KAN619-1_1.tif:0001-0153	0.976	79.516	0	465	20.422	11.069	0.901	77.632	14949	1.023	0.978	0.926	0.53814	1.11555	811	CEP170_KAN619-1_1.tif:0001-0153	0.976	147.761	0	497	20.422	11.069	0.901	144.26	27779	1.023	0.978	0.926
802	SCLT1_KAN619-1_1.tif:0002-0306	0.872	49.375	0	332	58.549	22.01	0.88	43.077	8295	1.226	0.815	0.955	0.39924	0.619002	812	CEP170_KAN619-1_1.tif:0002-0306	0.872	123.673	0	341	58.549	22.01	0.88	107.898	20777	1.226	0.815	0.955
803	SCLT1_KAN619-1_1.tif:0003-0431	0.737	20.465	0	133	86.816	31.051	0.93	15.091	2906	1.192	0.839	0.937	0.146479	0.216856	813	CEP170_KAN619-1_1.tif:0003-0431	0.737	139.711	0	459	86.816	31.051	0.93	103.027	19839	1.192	0.839	0.937
804	SCLT1_KAN619-1_1.tif:0004-0504	0.711	46.073	0	132	64.524	36.319	0.754	32.779	6312	1.773	0.564	0.87	0.452473	0.471023	814	CEP170_KAN619-1_1.tif:0004-0504	0.711	101.825	0	230	64.524	36.319	0.754	72.444	13950	1.773	0.564	0.87
805	SCLT1_KAN619-1_1.tif:0005-0528	0.691	21.481	0	121	40.252	38.107	0.826	14.837	2857	1.4	0.714	0.914	0.214409	0.213199	815	CEP170_KAN619-1_1.tif:0005-0528	0.691	100.188	0	246	40.252	38.107	0.826	69.199	13325	1.4	0.714	0.914
806	SCLT1_KAN619-1_1.tif:0006-0751	0.535	25.408	0	94	4.906	54.131	0.794	13.59	2617	1.613	0.62	0.866	0.234709	0.19529	816	CEP170_KAN619-1_1.tif:0006-0751	0.535	108.252	6	204	4.906	54.131	0.794	57.904	11150	1.613	0.62	0.866
807	SCLT1_KAN619-1_1.tif:0007-0769	0.956	44.25	0	396	33.071	55.429	0.835	42.283	8142	1.487	0.672	0.918	0.34298	0.607584	817	CEP170_KAN619-1_1.tif:0007-0769	0.956	129.016	0	454	33.071	55.429	0.835	123.28	23739	1.487	0.672	0.918
808	SCLT1_KAN619-1_1.tif:0008-0968	0.971	37.77	0	255	21.286	69.775	0.917	36.679	7063	1.023	0.978	0.935	0.245209	0.527066	818	CEP170_KAN619-1_1.tif:0008-0968	0.971	154.032	0	503	21.286	69.775	0.917	149.583	28804	1.023	0.978	0.935
809	SCLT1_KAN619-1_1.tif:0009-1030	0.919	46.102	0	210	76.88	74.205	0.868	42.376	8160	1.104	0.906	0.929	0.351225	0.608928	819	CEP170_KAN619-1_1.tif:0009-1030	0.919	131.26	0	414	76.88	74.205	0.868	120.652	23233	1.104	0.906	0.929
810	SCLT1_KAN619-1_1.tif:0010-1046	1.246	64.179	0	540	56.823	75.365	0.763	79.99	15403	1.381	0.724	0.863	0.577367	1.14943	820	CEP170_KAN619-1_1.tif:0010-1046	1.246	111.158	0	342	56.823	75.365	0.763	138.543	26678	1.381	0.724	0.863
821	SCLT1_KAN619-1_2.tif:0001-0089	1.527	66.119	0	623	17.863	6.362	0.685	100.95	19439	1.771	0.565	0.87	0.713803	1.45061	832	CEP170_KAN619-1_2.tif:0001-0089	1.527	92.629	0	444	17.863	6.362	0.685	141.425	27233	1.771	0.565	0.87
822	SCLT1_KAN619-1_2.tif:0002-0208	1.329	31.289	0	317	79.935	15.019	0.667	41.597	8010	1.961	0.51	0.839	0.262039	0.597734	833	CEP170_KAN619-1_2.tif:0002-0208	1.329	119.406	0	661	79.935	15.019	0.667	158.744	30568	1.961	0.51	0.839
823	SCLT1_KAN619-1_2.tif:0003-0375	1.096	63.735	0	621	31.065	26.999	0.881	69.837	13448	1.142	0.876	0.908	0.473571	1.00354	834	CEP170_KAN619-1_2.tif:0003-0375	1.096	134.583	0	385	31.065	26.999	0.881	147.47	28397	1.142	0.876	0.908
824	SCLT1_KAN619-1_2.tif:0004-0402	0.815	38.389	0	135	11.072	28.911	0.803	31.299	6027	1.369	0.73	0.915	0.334555	0.449756	835	CEP170_KAN619-1_2.tif:0004-0402	0.815	114.745	0	297	11.072	28.911	0.803	93.555	18015	1.369	0.73	0.915
825	SCLT1_KAN619-1_2.tif:0005-0484	1.516	51.418	0	318	74.545	34.759	0.696	77.97	15014	1.603	0.624	0.885	0.448487	1.1204	836	CEP170_KAN619-1_2.tif:0005-0484	1.516	114.647	0	492	74.545	34.759	0.696	173.851	33477	1.603	0.624	0.885
826	SCLT1_KAN619-1_2.tif:0006-0502	0.821	11.418	0	63	18.908	36.176	0.947	9.368	1804	1.351	0.74	0.958	0.0722264	0.134621	837	CEP170_KAN619-1_2.tif:0006-0502	0.821	158.082	0	555	18.908	36.176	0.947	129.709	24977	1.351	0.74	0.958
827	SCLT1_KAN619-1_2.tif:0007-0671	1.2	51.935	0	298	60.957	48.417	0.74	62.302	11997	1.729	0.578	0.899	0.489514	0.895258	838	CEP170_KAN619-1_2.tif:0007-0671	1.2	106.095	0	413	60.957	48.417	0.74	127.274	24508	1.729	0.578	0.899
828	SCLT1_KAN619-1_2.tif:0008-0815	1.35	43.25	0	399	32.467	58.729	0.651	58.397	11245	1.678	0.596	0.811	0.462472	0.839141	839	CEP170_KAN619-1_2.tif:0008-0815	1.35	93.519	0	372	32.467	58.729	0.651	126.271	24315	1.678	0.596	0.811
829	SCLT1_KAN619-1_2.tif:0009-1036	0.821	31.373	0	152	50.873	74.678	0.79	25.742	4957	1.673	0.598	0.927	0.279095	0.369909	840	CEP170_KAN619-1_2.tif:0009-1036	0.821	112.411	0	262	50.873	74.678	0.79	92.235	17761	1.673	0.598	0.927
830	SCLT1_KAN619-1_2.tif:0010-1060	0.898	19.63	0	227	9.816	76.377	0.868	17.636	3396	1.329	0.752	0.93	0.157865	0.253421	841	CEP170_KAN619-1_2.tif:0010-1060	0.898	124.347	0	463	9.816	76.377	0.868	111.715	21512	1.329	0.752	0.93
831	SCLT1_KAN619-1_2.tif:0011-1147	0.789	25.671	0	268	76.546	82.715	0.866	20.264	3902	1.222	0.818	0.938	0.252149	0.291181	842	CEP170_KAN619-1_2.tif:0011-1147	0.789	101.809	0	332	76.546	82.715	0.866	80.364	15475	1.222	0.818	0.938
843	SCLT1_KAN619-1_3.tif:0001-0047	0.53	5.01	0	22	78.803	3.369	0.95	2.654	511	1.12	0.893	0.971	0.0398472	0.0381326	853	CEP170_KAN619-1_3.tif:0001-0047	0.53	125.725	0	462	78.803	3.369	0.95	66.597	12824	1.12	0.893	0.971
844	SCLT1_KAN619-1_3.tif:0002-0177	1.007	31.206	0	162	65.818	12.771	0.9	31.439	6054	1.069	0.936	0.924	0.194844	0.451771	854	CEP170_KAN619-1_3.tif:0002-0177	1.007	160.16	0	621	65.818	12.771	0.9	161.356	31071	1.069	0.936	0.924
845	SCLT1_KAN619-1_3.tif:0003-0194	0.878	40.692	0	239	46.284	13.992	0.943	35.713	6877	1.141	0.876	0.936	0.275422	0.513186	855	CEP170_KAN619-1_3.tif:0003-0194	0.878	147.746	0	430	46.284	13.992	0.943	129.668	24969	1.141	0.876	0.936
846	SCLT1_KAN619-1_3.tif:0004-0394	1.345	81.815	0	611	80.814	28.34	0.823	110.043	21190	1.423	0.703	0.914	0.668117	1.58127	856	CEP170_KAN619-1_3.tif:0004-0394	1.345	122.456	0	577	80.814	28.34	0.823	164.706	31716	1.423	0.703	0.914
847	SCLT1_KAN619-1_3.tif:0005-0556	0.582	32.188	0	140	13.659	40.098	0.899	18.721	3605	1.146	0.872	0.937	0.279198	0.269018	857	CEP170_KAN619-1_3.tif:0005-0556	0.582	115.286	0	316	13.659	40.098	0.899	67.054	12912	1.146	0.872	0.937
848	SCLT1_KAN619-1_3.tif:0006-0662	0.966	71.194	0	545	26.121	47.677	0.852	68.768	13242	1.203	0.831	0.928	0.56818	0.988164	858	CEP170_KAN619-1_3.tif:0006-0662	0.966	125.301	0	564	26.121	47.677	0.852	121.031	23306	1.203	0.831	0.928
849	SCLT1_KAN619-1_3.tif:0007-0724	1.158	50.179	0	275	47.772	52.139	0.842	58.111	11190	1.508	0.663	0.91	0.383574	0.835037	859	CEP170_KAN619-1_3.tif:0007-0724	1.158	130.821	0	415	47.772	52.139	0.842	151.5	29173	1.508	0.663	0.91
850	SCLT1_KAN619-1_3.tif:0008-0982	1.075	56.918	0	410	70.955	70.757	0.716	61.186	11782	1.822	0.549	0.857	0.571858	0.879214	860	CEP170_KAN619-1_3.tif:0008-0982	1.075	99.531	0	286	70.955	70.757	0.716	106.994	20603	1.822	0.549	0.857
851	SCLT1_KAN619-1_3.tif:0009-1104	1.262	62.156	0	343	59.321	79.615	0.773	78.437	15104	1.381	0.724	0.879	0.43179	1.12711	861	CEP170_KAN619-1_3.tif:0009-1104	1.262	143.951	0	516	59.321	79.615	0.773	181.656	34980	1.381	0.724	0.879
852	SCLT1_KAN619-1_3.tif:0010-1129	1.132	35.046	0	166	42.987	81.338	0.754	39.676	7640	1.667	0.6	0.869	0.282169	0.570123	862	CEP170_KAN619-1_3.tif:0010-1129	1.132	124.202	0	336	42.987	81.338	0.754	140.61	27076	1.667	0.6	0.869
863	SCLT1_KAN619-1_4.tif:0001-0113	0.919	27.169	0	163	64.453	8.15	0.848	24.974	4809	1.36	0.735	0.912	0.169785	0.358864	875	CEP170_KAN619-1_4.tif:0001-0113	0.919	160.023	0	792	64.453	8.15	0.848	147.091	28324	1.36	0.735	0.912
864	SCLT1_KAN619-1_4.tif:0002-0130	0.743	28.986	0	137	88.705	9.388	0.912	21.526	4145	1.128	0.886	0.941	0.238479	0.309314	876	CEP170_KAN619-1_4.tif:0002-0130	0.743	121.545	0	313	88.705	9.388	0.912	90.262	17381	1.128	0.886	0.941
865	SCLT1_KAN619-1_4.tif:0003-0233	1.324	59.467	0	393	13.551	16.762	0.858	78.749	15164	1.091	0.916	0.909	0.475674	1.13159	877	CEP170_KAN619-1_4.tif:0003-0233	1.324	125.016	0	403	13.551	16.762	0.858	165.552	31879	1.091	0.916	0.909
866	SCLT1_KAN619-1_4.tif:0004-0334	0.846	34.595	0	133	38.301	24.103	0.942	29.284	5639	1.169	0.856	0.95	0.219399	0.420802	878	CEP170_KAN619-1_4.tif:0004-0334	0.846	157.681	0	495	38.301	24.103	0.942	133.474	25702	1.169	0.856	0.95
867	SCLT1_KAN619-1_4.tif:0005-0518	0.914	53.517	0	287	27.551	37.324	0.913	48.914	9419	1.144	0.874	0.941	0.352957	0.702878	879	CEP170_KAN619-1_4.tif:0005-0518	0.914	151.625	0	469	27.551	37.324	0.913	138.584	26686	1.144	0.874	0.941
868	SCLT1_KAN619-1_4.tif:0006-0534	0.95	39.645	0	259	43.126	38.505	0.909	37.676	7255	1.168	0.856	0.917	0.265731	0.541393	880	CEP170_KAN619-1_4.tif:0006-0534	0.95	149.191	0	541	43.126	38.505	0.909	141.783	27302	1.168	0.856	0.917
869	SCLT1_KAN619-1_4.tif:0007-0561	1.033	80.658	0	464	73.728	40.468	0.915	83.355	16051	1.163	0.86	0.93	0.460614	1.19778	881	CEP170_KAN619-1_4.tif:0007-0561	1.033	175.111	0	880	73.728	40.468	0.915	180.966	34847	1.163	0.86	0.93
870	SCLT1_KAN619-1_4.tif:0008-0699	0.904	16.006	0	118	13.273	50.368	0.834	14.463	2785	1.298	0.771	0.906	0.128081	0.207826	882	CEP170_KAN619-1_4.tif:0008-0699	0.904	124.966	0	455	13.273	50.368	0.834	112.92	21744	1.298	0.771	0.906
871	SCLT1_KAN619-1_4.tif:0009-0720	0.867	50.964	0	190	23.955	51.877	0.846	44.199	8511	1.12	0.893	0.9	0.417001	0.63512	883	CEP170_KAN619-1_4.tif:0009-0720	0.867	122.216	0	418	23.955	51.877	0.846	105.992	20410	1.12	0.893	0.9
872	SCLT1_KAN619-1_4.tif:0010-0755	0.914	33.892	0	132	83.765	54.412	0.883	30.977	5965	1.245	0.803	0.926	0.21751	0.445129	884	CEP170_KAN619-1_4.tif:0010-0755	0.914	155.818	0	576	83.765	54.412	0.883	142.417	27424	1.245	0.803	0.926
873	SCLT1_KAN619-1_4.tif:0011-0809	1.262	65.169	0	327	54.559	58.237	0.824	82.239	15836	1.345	0.744	0.907	0.627268	1.18174	885	CEP170_KAN619-1_4.tif:0011-0809	1.262	103.893	0	339	54.559	58.237	0.824	131.106	25246	1.345	0.744	0.907
874	SCLT1_KAN619-1_4.tif:0012-1263	0.883	44.288	0	286	30.885	91.038	0.861	39.099	7529	1.436	0.696	0.95	0.348355	0.56184	886	CEP170_KAN619-1_4.tif:0012-1263	0.883	127.135	0	494	30.885	91.038	0.861	112.239	21613	1.436	0.696	0.95
887	SCLT1_KAN619-1_5.tif:0001-0064	1.07	20.442	0	174	58.977	4.608	0.842	21.868	4211	1.462	0.684	0.914	0.141785	0.314239	899	CEP170_KAN619-1_5.tif:0001-0064	1.07	144.175	0	423	58.977	4.608	0.842	154.236	29700	1.462	0.684	0.914
888	SCLT1_KAN619-1_5.tif:0002-0161	0.878	20.438	0	104	56.424	11.621	0.967	17.937	3454	1.098	0.911	0.934	0.15022	0.257749	900	CEP170_KAN619-1_5.tif:0002-0161	0.878	136.053	0	498	56.424	11.621	0.967	119.406	22993	1.098	0.911	0.934
889	SCLT1_KAN619-1_5.tif:0003-0246	0.888	27.345	0	179	30.465	17.786	0.931	24.283	4676	1.303	0.768	0.934	0.183365	0.348939	901	CEP170_KAN619-1_5.tif:0003-0246	0.888	149.129	0	612	30.465	17.786	0.931	132.43	25501	1.303	0.768	0.934
890	SCLT1_KAN619-1_5.tif:0004-0283	0.826	26.73	0	133	9.958	20.369	0.896	22.071	4250	1.144	0.874	0.935	0.182937	0.31715	902	CEP170_KAN619-1_5.tif:0004-0283	0.826	146.113	0	448	9.958	20.369	0.896	120.647	23232	1.144	0.874	0.935
891	SCLT1_KAN619-1_5.tif:0005-0471	0.867	33.683	0	180	27.623	33.99	0.782	29.211	5625	1.8	0.555	0.908	0.314615	0.419757	903	CEP170_KAN619-1_5.tif:0005-0471	0.867	107.06	0	296	27.623	33.99	0.782	92.848	17879	1.8	0.555	0.908
892	SCLT1_KAN619-1_5.tif:0006-0637	0.763	16.068	0	119	43.553	45.96	0.89	12.266	2362	1.264	0.791	0.951	0.125471	0.176261	904	CEP170_KAN619-1_5.tif:0006-0637	0.763	128.061	0	414	43.553	45.96	0.89	97.761	18825	1.264	0.791	0.951
893	SCLT1_KAN619-1_5.tif:0007-0734	1.174	23.827	0	253	63.028	52.902	0.668	27.965	5385	1.492	0.67	0.829	0.166662	0.401847	905	CEP170_KAN619-1_5.tif:0007-0734	1.174	142.969	0	520	63.028	52.902	0.668	167.796	32311	1.492	0.67	0.829
894	SCLT1_KAN619-1_5.tif:0008-0808	1.402	49.633	0	380	84.068	58.32	0.772	69.593	13401	1.384	0.722	0.893	0.376126	1.00003	906	CEP170_KAN619-1_5.tif:0008-0808	1.402	131.959	0	701	84.068	58.32	0.772	185.027	35629	1.384	0.722	0.893
895	SCLT1_KAN619-1_5.tif:0009-0879	1.059	8.627	0	114	30.54	63.302	0.851	9.14	1760	1.461	0.685	0.907	0.0647344	0.131337	907	CEP170_KAN619-1_5.tif:0009-0879	1.059	133.275	0	402	30.54	63.302	0.851	141.191	27188	1.461	0.685	0.907
896	SCLT1_KAN619-1_5.tif:0010-1020	0.883	24.612	0	141	24.69	73.478	0.882	21.728	4184	1.072	0.933	0.924	0.203324	0.312225	908	CEP170_KAN619-1_5.tif:0010-1020	0.883	121.047	0	391	24.69	73.478	0.882	106.865	20578	1.072	0.933	0.924
897	SCLT1_KAN619-1_5.tif:0011-1178	0.556	9.664	0	46	18.395	84.905	0.924	5.37	1034	1.246	0.803	0.955	0.0960699	0.0771607	909	CEP170_KAN619-1_5.tif:0011-1178	0.556	100.589	0	290	18.395	84.905	0.924	55.894	10763	1.246	0.803	0.955
898	SCLT1_KAN619-1_5.tif:0012-1199	0.748	31.924	0	143	91.279	86.49	0.773	23.873	4597	1.425	0.702	0.892	0.269445	0.343044	910	CEP170_KAN619-1_5.tif:0012-1199	0.748	118.479	0	343	91.279	86.49	0.773	88.6	17061	1.425	0.702	0.892
911	SCLT1_KAN619-1_6.tif:0001-0111	0.55	15.17	0	66	51.954	7.979	0.888	8.351	1608	1.261	0.793	0.942	0.144526	0.119995	922	CEP170_KAN619-1_6.tif:0001-0111	0.55	104.962	0	243	51.954	7.979	0.888	57.779	11126	1.261	0.793	0.942
912	SCLT1_KAN619-1_6.tif:0002-0225	1.428	38.884	0	379	37.984	16.24	0.773	55.53	10693	1.712	0.584	0.903	0.245957	0.797949	923	CEP170_KAN619-1_6.tif:0002-0225	1.428	158.091	0	887	37.984	16.24	0.773	225.772	43475	1.712	0.584	0.903
913	SCLT1_KAN619-1_6.tif:0003-0383	0.691	134.91	0	681	35.094	27.624	0.704	93.181	17943	2.18	0.459	0.893	25.5235	1.33897	924	CEP170_KAN619-1_6.tif:0003-0383	0.691	5.286	0	28	35.094	27.624	0.704	3.651	703	2.18	0.459	0.893
914	SCLT1_KAN619-1_6.tif:0004-0435	0.935	50.511	0	336	67.568	31.368	0.862	47.216	9092	1.126	0.888	0.918	0.336143	0.678477	925	CEP170_KAN619-1_6.tif:0004-0435	0.935	150.267	0	641	67.568	31.368	0.862	140.464	27048	1.126	0.888	0.918
915	SCLT1_KAN619-1_6.tif:0005-0672	0.67	23.62	0	138	35.673	48.39	0.902	15.824	3047	1.286	0.777	0.938	0.205116	0.227378	926	CEP170_KAN619-1_6.tif:0005-0672	0.67	115.155	0	266	35.673	48.39	0.902	77.144	14855	1.286	0.777	0.938
916	SCLT1_KAN619-1_6.tif:0006-0674	0.831	22.031	0	148	8.789	48.611	0.925	18.306	3525	1.244	0.804	0.928	0.167339	0.263048	927	CEP170_KAN619-1_6.tif:0006-0674	0.831	131.656	0	378	8.789	48.611	0.925	109.394	21065	1.244	0.804	0.928
917	SCLT1_KAN619-1_6.tif:0007-0758	0.909	46.2	0	244	65.85	54.699	0.908	41.987	8085	1.165	0.858	0.938	0.309178	0.603331	928	CEP170_KAN619-1_6.tif:0007-0758	0.909	149.429	0	457	65.85	54.699	0.908	135.801	26150	1.165	0.858	0.938
918	SCLT1_KAN619-1_6.tif:0008-0782	0.758	65.164	0	324	59.971	56.371	0.907	49.408	9514	1.188	0.842	0.948	0.480894	0.709968	929	CEP170_KAN619-1_6.tif:0008-0782	0.758	135.507	0	351	59.971	56.371	0.907	102.741	19784	1.188	0.842	0.948
919	SCLT1_KAN619-1_6.tif:0009-0950	1.148	34.466	0	232	36.123	68.496	0.795	39.556	7617	1.18	0.848	0.863	0.270586	0.568407	930	CEP170_KAN619-1_6.tif:0009-0950	1.148	127.376	0	441	36.123	68.496	0.795	146.187	28150	1.18	0.848	0.863
920	SCLT1_KAN619-1_6.tif:0010-1020	0.966	49.968	0	210	71.198	73.558	0.883	48.265	9294	1.044	0.958	0.916	0.28127	0.693551	931	CEP170_KAN619-1_6.tif:0010-1020	0.966	177.651	0	674	71.198	73.558	0.883	171.597	33043	1.044	0.958	0.916
921	SCLT1_KAN619-1_6.tif:0011-1150	0.717	37.478	0	166	14.616	82.9	0.904	26.859	5172	1.372	0.729	0.939	0.320268	0.385953	932	CEP170_KAN619-1_6.tif:0011-1150	0.717	117.022	0	341	14.616	82.9	0.904	83.864	16149	1.372	0.729	0.939
									AVERAGE	7829.92					0.584296
									SEM	603.744
										2.09176e-07
933	SCLT1_KAN619-2_1.tif:0001-0490	1.563	81.066	0	821	67.229	35.297	0.809	126.718	24401	1.654	0.605	0.947	0.959008	1.82089	941	CEP170_KAN619-2_1.tif:0001-0490	1.563	84.532	0	421	67.229	35.297	0.809	132.134	25444	1.654	0.605	0.947
934	SCLT1_KAN619-2_1.tif:0002-0517	1.303	129.434	0	1014	88.677	37.314	0.892	168.715	32488	1.369	0.73	0.945	1.048	2.42437	942	CEP170_KAN619-2_1.tif:0002-0517	1.303	123.506	0	515	88.677	37.314	0.892	160.988	31000	1.369	0.73	0.945
935	SCLT1_KAN619-2_1.tif:0003-0552	1.2	74.706	0	644	11.353	39.707	0.685	89.618	17257	1.959	0.511	0.84	0.856044	1.28778	943	CEP170_KAN619-2_1.tif:0003-0552	1.2	87.268	0	388	11.353	39.707	0.685	104.689	20159	1.959	0.511	0.84
936	SCLT1_KAN619-2_1.tif:0004-0616	1.407	90.897	0	610	41.955	44.356	0.746	127.923	24633	2.145	0.466	0.971	1.06466	1.8382	944	CEP170_KAN619-2_1.tif:0004-0616	1.407	85.376	0	376	41.955	44.356	0.746	120.154	23137	2.145	0.466	0.971
937	SCLT1_KAN619-2_1.tif:0005-0722	0.587	15.575	0	132	2.594	52.086	0.79	9.14	1760	1.522	0.657	0.886	0.139849	0.131337	945	CEP170_KAN619-2_1.tif:0005-0722	0.587	111.372	0	300	2.594	52.086	0.79	65.356	12585	1.522	0.657	0.886
938	SCLT1_KAN619-2_1.tif:0006-0913	1.303	59.259	0	349	83.079	65.763	0.848	77.243	14874	1.505	0.665	0.951	0.476136	1.10995	946	CEP170_KAN619-2_1.tif:0006-0913	1.303	124.458	0	366	83.079	65.763	0.848	162.229	31239	1.505	0.665	0.951
939	SCLT1_KAN619-2_1.tif:0007-0966	1.226	48.055	0	335	15.228	69.635	0.692	58.895	11341	1.611	0.621	0.828	0.408685	0.846305	947	CEP170_KAN619-2_1.tif:0007-0966	1.226	117.585	0	494	15.228	69.635	0.692	144.11	27750	1.611	0.621	0.828
940	SCLT1_KAN619-2_1.tif:0008-1180	1.444	93.835	0	885	61.293	85.122	0.773	135.468	26086	1.734	0.577	0.913	1.12561	1.94663	948	CEP170_KAN619-2_1.tif:0008-1180	1.444	83.363	0	399	61.293	85.122	0.773	120.351	23175	1.734	0.577	0.913
949	SCLT1_KAN619-2_2.tif:0001-0071	0.914	75.062	0	262	80.265	5.124	0.892	68.607	13211	1.461	0.685	0.949	0.526209	0.985851	959	CEP170_KAN619-2_2.tif:0001-0071	0.914	142.648	0	405	80.265	5.124	0.892	130.379	25106	1.461	0.685	0.949
950	SCLT1_KAN619-2_2.tif:0002-0482	0.649	47.016	0	235	14.698	34.815	0.841	30.52	5877	1.244	0.804	0.883	0.415688	0.438562	960	CEP170_KAN619-2_2.tif:0002-0482	0.649	113.104	0	256	14.698	34.815	0.841	73.421	14138	1.244	0.804	0.883
951	SCLT1_KAN619-2_2.tif:0003-0489	1.044	91.93	0	397	84.636	35.334	0.846	95.959	18478	1.164	0.859	0.916	0.589109	1.37889	961	CEP170_KAN619-2_2.tif:0003-0489	1.044	156.05	0	560	84.636	35.334	0.846	162.888	31366	1.164	0.859	0.916
952	SCLT1_KAN619-2_2.tif:0004-0521	0.898	53.59	0	210	44.649	37.528	0.965	48.146	9271	1.223	0.818	0.948	0.37539	0.691834	962	CEP170_KAN619-2_2.tif:0004-0521	0.898	142.757	0	411	44.649	37.528	0.965	128.255	24697	1.223	0.818	0.948
953	SCLT1_KAN619-2_2.tif:0005-0568	1.122	87.394	0	531	59.45	41.003	0.822	98.031	18877	1.497	0.668	0.919	0.708649	1.40867	963	CEP170_KAN619-2_2.tif:0005-0568	1.122	123.324	0	640	59.45	41.003	0.822	138.335	26638	1.497	0.668	0.919
954	SCLT1_KAN619-2_2.tif:0006-0758	0.758	29.938	0	307	42.814	54.671	0.875	22.699	4371	1.242	0.805	0.904	0.254513	0.326179	964	CEP170_KAN619-2_2.tif:0006-0758	0.758	117.63	0	285	42.814	54.671	0.875	89.187	17174	1.242	0.805	0.904
955	SCLT1_KAN619-2_2.tif:0007-0953	1.371	84.303	0	662	38.032	68.714	0.809	115.579	22256	1.442	0.693	0.904	0.775254	1.66082	965	CEP170_KAN619-2_2.tif:0007-0953	1.371	108.742	0	506	38.032	68.714	0.809	149.085	28708	1.442	0.693	0.904
956	SCLT1_KAN619-2_2.tif:0008-1022	1.049	63.946	0	378	55.117	73.617	0.775	67.08	12917	1.358	0.736	0.871	0.806808	0.963911	966	CEP170_KAN619-2_2.tif:0008-1022	1.049	79.257	0	310	55.117	73.617	0.775	83.142	16010	1.358	0.736	0.871
957	SCLT1_KAN619-2_2.tif:0009-1058	1.246	82.575	0	594	80.843	76.139	0.799	102.918	19818	1.35	0.741	0.894	0.847865	1.47889	967	CEP170_KAN619-2_2.tif:0009-1058	1.246	97.392	0	345	80.843	76.139	0.799	121.385	23374	1.35	0.741	0.894
958	SCLT1_KAN619-2_2.tif:0010-1066	0.826	50.019	0	282	32.348	76.9	0.875	41.301	7953	1.2	0.834	0.919	0.401221	0.59348	968	CEP170_KAN619-2_2.tif:0010-1066	0.826	124.667	0	365	32.348	76.9	0.875	102.939	19822	1.2	0.834	0.919
969	SCLT1_KAN619-2_3.tif:0001-0192	0.956	84.337	0	583	11.16	13.865	0.758	80.587	15518	1.393	0.718	0.868	1.01717	1.15801	979	CEP170_KAN619-2_3.tif:0001-0192	0.956	82.913	0	312	11.16	13.865	0.758	79.227	15256	1.393	0.718	0.868
970	SCLT1_KAN619-2_3.tif:0002-0267	1.272	93.037	0	459	7.172	19.217	0.831	118.373	22794	1.316	0.76	0.906	0.77111	1.70097	980	CEP170_KAN619-2_3.tif:0002-0267	1.272	120.653	0	469	7.172	19.217	0.831	153.509	29560	1.316	0.76	0.906
971	SCLT1_KAN619-2_3.tif:0003-0274	1.257	99.897	0	605	73.582	19.778	0.844	125.544	24175	1.399	0.715	0.929	0.889048	1.80402	981	CEP170_KAN619-2_3.tif:0003-0274	1.257	112.364	0	438	73.582	19.778	0.844	141.212	27192	1.399	0.715	0.929
972	SCLT1_KAN619-2_3.tif:0004-0438	1.002	105.793	0	685	38.643	31.612	0.82	106.034	20418	1.345	0.744	0.915	1.09999	1.52366	982	CEP170_KAN619-2_3.tif:0004-0438	1.002	96.176	0	297	38.643	31.612	0.82	96.395	18562	1.345	0.744	0.915
973	SCLT1_KAN619-2_3.tif:0005-0545	0.701	27.207	0	152	82.336	39.294	0.971	19.074	3673	1.199	0.834	0.951	0.219218	0.274092	983	CEP170_KAN619-2_3.tif:0005-0545	0.701	124.111	0	361	82.336	39.294	0.971	87.011	16755	1.199	0.834	0.951
974	SCLT1_KAN619-2_3.tif:0006-0573	1.397	31.993	0	189	15.093	41.275	0.772	44.692	8606	1.858	0.538	0.883	0.264824	0.64221	984	CEP170_KAN619-2_3.tif:0006-0573	1.397	120.807	0	359	15.093	41.275	0.772	168.762	32497	1.858	0.538	0.883
975	SCLT1_KAN619-2_3.tif:0007-0737	0.623	9.392	0	54	56.72	53.103	0.826	5.853	1127	2.026	0.494	0.972	0.122447	0.0841007	985	CEP170_KAN619-2_3.tif:0007-0737	0.623	76.7	0	220	56.72	53.103	0.826	47.798	9204	2.026	0.494	0.972
976	SCLT1_KAN619-2_3.tif:0008-0798	1.163	63.46	0	339	32.818	57.494	0.836	73.821	14215	1.302	0.768	0.918	0.589247	1.06077	986	CEP170_KAN619-2_3.tif:0008-0798	1.163	107.696	0	363	32.818	57.494	0.836	125.279	24124	1.302	0.768	0.918
977	SCLT1_KAN619-2_3.tif:0009-0844	0.634	8.484	0	63	52.494	60.821	0.77	5.375	1035	2.127	0.47	0.9	0.0867052	0.0772353	987	CEP170_KAN619-2_3.tif:0009-0844	0.634	97.844	0	207	52.494	60.821	0.77	61.991	11937	2.127	0.47	0.9
978	SCLT1_KAN619-2_3.tif:0010-1189	0.561	20.037	0	109	39.201	85.75	0.894	11.238	2164	1.352	0.74	0.931	0.166911	0.161485	988	CEP170_KAN619-2_3.tif:0010-1189	0.561	120.046	0	287	39.201	85.75	0.894	67.329	12965	1.352	0.74	0.931
989	SCLT1_KAN619-2_4.tif:0001-0105	0.8	12.234	0	83	60.756	7.636	0.89	9.784	1884	1.203	0.831	0.911	0.101476	0.140591	994	CEP170_KAN619-2_4.tif:0001-0105	0.8	120.558	0	314	60.756	7.636	0.89	96.416	18566	1.203	0.831	0.911
990	SCLT1_KAN619-2_4.tif:0002-0312	1.283	69.036	0	552	18.993	22.496	0.735	88.554	17052	2.075	0.482	0.917	0.890026	1.27248	995	CEP170_KAN619-2_4.tif:0002-0312	1.283	77.567	0	420	18.993	22.496	0.735	99.496	19159	2.075	0.482	0.917
991	SCLT1_KAN619-2_4.tif:0003-0449	1.2	68.485	0	416	58.209	32.419	0.675	82.156	15820	1.825	0.548	0.868	0.699474	1.18054	996	CEP170_KAN619-2_4.tif:0003-0449	1.2	97.909	0	634	58.209	32.419	0.675	117.453	22617	1.825	0.548	0.868
992	SCLT1_KAN619-2_4.tif:0004-0841	1.527	92.19	0	904	77.443	60.558	0.787	140.755	27104	1.7	0.588	0.883	0.711055	2.02259	997	CEP170_KAN619-2_4.tif:0004-0841	1.527	129.653	0	649	77.443	60.558	0.787	197.952	38118	1.7	0.588	0.883
993	SCLT1_KAN619-2_4.tif:0005-1270	1.039	53.91	0	344	58.373	91.45	0.703	55.993	10782	2.23	0.448	0.909	0.552441	0.80459	998	CEP170_KAN619-2_4.tif:0005-1270	1.039	97.585	0	488	58.373	91.45	0.703	101.355	19517	2.23	0.448	0.909
999	SCLT1_KAN619-2_5.tif:0001-0072	1.096	101.161	0	490	35.701	5.216	0.94	110.848	21345	1.162	0.86	0.925	0.681187	1.59284	1008	CEP170_KAN619-2_5.tif:0001-0072	1.096	148.507	0	534	35.701	5.216	0.94	162.727	31335	1.162	0.86	0.925
1000	SCLT1_KAN619-2_5.tif:0002-0212	1.132	52.917	0	358	53.437	15.305	0.737	59.908	11536	1.71	0.585	0.888	0.454245	0.860856	1009	CEP170_KAN619-2_5.tif:0002-0212	1.132	116.495	0	372	53.437	15.305	0.737	131.885	25396	1.71	0.585	0.888
1001	SCLT1_KAN619-2_5.tif:0003-0282	0.997	103.786	0	381	36.788	20.348	0.92	103.484	19927	1.224	0.817	0.95	0.605942	1.48702	1010	CEP170_KAN619-2_5.tif:0003-0282	0.997	171.281	0	590	36.788	20.348	0.92	170.782	32886	1.224	0.817	0.95
1002	SCLT1_KAN619-2_5.tif:0004-0421	0.961	84.292	0	597	27.236	30.366	0.786	80.982	15594	1.696	0.59	0.892	1.1802	1.16368	1011	CEP170_KAN619-2_5.tif:0004-0421	0.961	71.422	0	267	27.236	30.366	0.786	68.617	13213	1.696	0.59	0.892
1003	SCLT1_KAN619-2_5.tif:0005-0438	0.556	56.738	0	247	72.178	31.562	0.885	31.528	6071	1.391	0.719	0.922	0.503776	0.453039	1012	CEP170_KAN619-2_5.tif:0005-0438	0.556	112.626	0	285	72.178	31.562	0.885	62.583	12051	1.391	0.719	0.922
1004	SCLT1_KAN619-2_5.tif:0006-0656	0.945	123.681	0	767	52.802	47.347	0.864	116.898	22510	1.215	0.823	0.905	1.03437	1.67977	1013	CEP170_KAN619-2_5.tif:0006-0656	0.945	119.571	0	427	52.802	47.347	0.864	113.013	21762	1.215	0.823	0.905
1005	SCLT1_KAN619-2_5.tif:0007-0842	1.018	78.224	0	370	47.679	60.695	0.862	79.621	15332	1.324	0.755	0.903	0.512176	1.14413	1014	CEP170_KAN619-2_5.tif:0007-0842	1.018	152.73	0	496	47.679	60.695	0.862	155.457	29935	1.324	0.755	0.903
1006	SCLT1_KAN619-2_5.tif:0008-1018	0.732	79.78	0	234	82.788	73.324	0.876	58.418	11249	1.232	0.811	0.931	0.63893	0.839439	1015	CEP170_KAN619-2_5.tif:0008-1018	0.732	124.865	0	307	82.788	73.324	0.876	91.431	17606	1.232	0.811	0.931
1007	SCLT1_KAN619-2_5.tif:0009-1174	0.779	81.52	0	272	25.865	84.611	0.833	63.502	12228	1.216	0.823	0.923	0.854687	0.912496	1016	CEP170_KAN619-2_5.tif:0009-1174	0.779	95.38	0	371	25.865	84.611	0.833	74.298	14307	1.216	0.823	0.923
1017	SCLT1_KAN619-2_6.tif:0001-0341	1.381	94.034	0	582	78.224	24.574	0.666	129.896	25013	2.356	0.424	0.842	1.01882	1.86656	1023	CEP170_KAN619-2_6.tif:0001-0341	1.381	92.297	0	556	78.224	24.574	0.666	127.497	24551	2.356	0.424	0.842
1018	SCLT1_KAN619-2_6.tif:0002-0485	1.236	54.513	0	442	48.057	34.916	0.863	67.376	12974	1.262	0.793	0.914	0.428737	0.968165	1024	CEP170_KAN619-2_6.tif:0002-0485	1.236	127.147	0	543	48.057	34.916	0.863	157.15	30261	1.262	0.793	0.914
1019	SCLT1_KAN619-2_6.tif:0003-0571	0.945	67.643	0	301	6.164	41.116	0.766	63.933	12311	1.48	0.676	0.867	0.770208	0.91869	1025	CEP170_KAN619-2_6.tif:0003-0571	0.945	87.824	0	301	6.164	41.116	0.766	83.007	15984	1.48	0.676	0.867
1020	SCLT1_KAN619-2_6.tif:0004-0856	1.189	54.397	0	420	26.132	61.706	0.702	64.691	12457	1.917	0.522	0.851	0.638559	0.929585	1026	CEP170_KAN619-2_6.tif:0004-0856	1.189	85.188	0	381	26.132	61.706	0.702	101.308	19508	1.917	0.522	0.851
1021	SCLT1_KAN619-2_6.tif:0005-1038	1.288	67.996	0	370	34.536	74.77	0.848	87.572	16863	1.595	0.627	0.938	0.713536	1.25838	1027	CEP170_KAN619-2_6.tif:0005-1038	1.288	95.294	0	492	34.536	74.77	0.848	122.73	23633	1.595	0.627	0.938
1022	SCLT1_KAN619-2_6.tif:0006-1072	1.387	64.086	0	414	55.187	77.181	0.745	88.86	17111	1.437	0.696	0.887	0.489781	1.27688	1028	CEP170_KAN619-2_6.tif:0006-1072	1.387	130.846	0	699	55.187	77.181	0.745	181.428	34936	1.437	0.696	0.887
									AVERAGE	14682.4			AVERAGE	0.635104	1.09565
									SEM	1111.42			SEM	0.0432231
										0.353662
1029	SCLT1_KAN619-3_1.tif:0001-0527	0.711	51.168	0	369	37.643	37.932	0.851	36.404	7010	1.202	0.832	0.913	0.480598	0.523111	1036	CEP170_KAN619-3_1.tif:0001-0527	0.711	106.467	0	342	37.643	37.932	0.851	75.747	14586	1.202	0.832	0.913
1030	SCLT1_KAN619-3_1.tif:0002-0624	0.982	56.069	0	536	68.425	45.005	0.858	55.032	10597	1.519	0.658	0.926	0.523179	0.790785	1037	CEP170_KAN619-3_1.tif:0002-0624	0.982	107.169	0	427	68.425	45.005	0.858	105.187	20255	1.519	0.658	0.926
1031	SCLT1_KAN619-3_1.tif:0003-0842	0.727	30.143	0	123	91.621	60.727	0.87	21.915	4220	1.072	0.933	0.949	0.150162	0.314911	1038	CEP170_KAN619-3_1.tif:0003-0842	0.727	200.736	0	791	91.621	60.727	0.87	145.943	28103	1.072	0.933	0.949
1032	SCLT1_KAN619-3_1.tif:0004-0847	0.904	20.948	0	85	4.182	61.041	0.873	18.929	3645	1.586	0.631	0.923	0.202029	0.272003	1039	CEP170_KAN619-3_1.tif:0004-0847	0.904	103.69	0	265	4.182	61.041	0.873	93.695	18042	1.586	0.631	0.923
1033	SCLT1_KAN619-3_1.tif:0005-0904	0.872	17.839	0	92	57.133	65.148	0.863	15.564	2997	1.515	0.66	0.911	0.137565	0.223647	1040	CEP170_KAN619-3_1.tif:0005-0904	0.872	129.679	0	341	57.133	65.148	0.863	113.138	21786	1.515	0.66	0.911
1034	SCLT1_KAN619-3_1.tif:0006-1072	0.956	39.304	0	162	44.518	77.27	0.906	37.557	7232	1.499	0.667	0.918	0.283263	0.539677	1041	CEP170_KAN619-3_1.tif:0006-1072	0.956	138.755	0	469	44.518	77.27	0.906	132.586	25531	1.499	0.667	0.918
1035	SCLT1_KAN619-3_1.tif:0007-1181	0.743	19.112	0	70	74.031	85.15	0.787	14.193	2733	1.783	0.561	0.902	0.165626	0.203946	1042	CEP170_KAN619-3_1.tif:0007-1181	0.743	115.392	0	273	74.031	85.15	0.787	85.692	16501	1.783	0.561	0.902
1043	SCLT1_KAN619-3_2.tif:0001-0036	1.158	7.152	0	51	81.69	2.592	0.931	8.283	1595	1.327	0.754	0.953	0.0315024	0.119024	1054	CEP170_KAN619-3_2.tif:0001-0036	1.158	227.045	0	732	81.69	2.592	0.931	262.934	50631	1.327	0.754	0.953
1044	SCLT1_KAN619-3_2.tif:0002-0052	0.649	21.008	0	128	35.582	3.742	0.806	13.637	2626	1.747	0.573	0.933	0.193017	0.195961	1055	CEP170_KAN619-3_2.tif:0002-0052	0.649	108.84	0	251	35.582	3.742	0.806	70.653	13605	1.747	0.573	0.933
1045	SCLT1_KAN619-3_2.tif:0003-0279	1.168	21.022	0	91	12.358	20.105	0.849	24.564	4730	1.515	0.66	0.928	0.133146	0.352969	1056	CEP170_KAN619-3_2.tif:0003-0279	1.168	157.889	0	507	12.358	20.105	0.849	184.487	35525	1.515	0.66	0.928
1046	SCLT1_KAN619-3_2.tif:0004-0373	0.748	18.451	0	212	71.58	26.943	0.781	13.798	2657	1.705	0.586	0.929	0.158475	0.198275	1057	CEP170_KAN619-3_2.tif:0004-0373	0.748	116.431	0	406	71.58	26.943	0.781	87.068	16766	1.705	0.586	0.929
1047	SCLT1_KAN619-3_2.tif:0005-0730	0.815	30.707	0	147	66.848	52.66	0.843	25.036	4821	1.578	0.634	0.932	0.20607	0.35976	1058	CEP170_KAN619-3_2.tif:0005-0730	0.815	149.013	0	467	66.848	52.66	0.843	121.494	23395	1.578	0.634	0.932
1048	SCLT1_KAN619-3_2.tif:0006-0740	1.127	48.429	0	407	49.818	53.306	0.843	54.575	10509	1.156	0.865	0.9	0.328499	0.784218	1059	CEP170_KAN619-3_2.tif:0006-0740	1.127	147.424	0	645	49.818	53.306	0.843	166.134	31991	1.156	0.865	0.9
1049	SCLT1_KAN619-3_2.tif:0007-0906	0.95	27.874	0	120	35.667	65.248	0.83	26.49	5101	1.35	0.741	0.908	0.196109	0.380654	1060	CEP170_KAN619-3_2.tif:0007-0906	0.95	142.137	0	509	35.667	65.248	0.83	135.079	26011	1.35	0.741	0.908
1050	SCLT1_KAN619-3_2.tif:0008-1033	0.571	22.464	0	76	20.25	74.446	0.843	12.832	2471	1.746	0.573	0.991	0.245651	0.184395	1061	CEP170_KAN619-3_2.tif:0008-1033	0.571	91.445	0	279	20.25	74.446	0.843	52.238	10059	1.746	0.573	0.991
1051	SCLT1_KAN619-3_2.tif:0009-1076	0.717	34.681	0	216	16.554	77.497	0.848	24.854	4786	1.506	0.664	0.905	0.256292	0.357148	1062	CEP170_KAN619-3_2.tif:0009-1076	0.717	135.319	0	513	16.554	77.497	0.848	96.977	18674	1.506	0.664	0.905
1052	SCLT1_KAN619-3_2.tif:0010-1182	0.94	25	0	132	65.121	85.186	0.93	23.499	4525	1.202	0.832	0.943	0.1821	0.337671	1063	CEP170_KAN619-3_2.tif:0010-1182	0.94	137.287	0	443	65.121	85.186	0.93	129.045	24849	1.202	0.832	0.943
1053	SCLT1_KAN619-3_2.tif:0011-1228	1.08	13.837	0	140	65.265	88.546	0.887	14.946	2878	1.262	0.792	0.912	0.11375	0.214766	1064	CEP170_KAN619-3_2.tif:0011-1228	1.08	121.639	0	378	65.265	88.546	0.887	131.392	25301	1.262	0.792	0.912
1065	SCLT1_KAN619-3_3.tif:0001-0128	0.935	22.917	0	122	66.304	9.274	0.871	21.422	4125	1.51	0.662	0.955	0.145287	0.307822	1077	CEP170_KAN619-3_3.tif:0001-0128	0.935	157.733	0	520	66.304	9.274	0.871	147.444	28392	1.51	0.662	0.955
1066	SCLT1_KAN619-3_3.tif:0002-0273	0.576	25.135	0	174	81.557	19.68	0.902	14.489	2790	1.248	0.801	0.969	0.187828	0.208199	1078	CEP170_KAN619-3_3.tif:0002-0273	0.576	133.82	0	440	81.557	19.68	0.902	77.139	14854	1.248	0.801	0.969
1067	SCLT1_KAN619-3_3.tif:0003-0331	1.106	32.085	0	186	88.278	23.871	0.881	35.49	6834	1.353	0.739	0.912	0.212262	0.509977	1079	CEP170_KAN619-3_3.tif:0003-0331	1.106	151.155	0	474	88.278	23.871	0.881	167.199	32196	1.353	0.739	0.912
1068	SCLT1_KAN619-3_3.tif:0004-0364	1.018	50.327	0	221	42.906	26.234	0.881	51.225	9864	1.43	0.699	0.918	0.27892	0.736086	1080	CEP170_KAN619-3_3.tif:0004-0364	1.018	180.434	0	791	42.906	26.234	0.881	183.656	35365	1.43	0.699	0.918
1069	SCLT1_KAN619-3_3.tif:0005-0467	0.748	15.882	0	85	70.621	33.703	0.872	11.877	2287	1.426	0.701	0.944	0.136905	0.170664	1081	CEP170_KAN619-3_3.tif:0005-0467	0.748	116.007	0	362	70.621	33.703	0.872	86.752	16705	1.426	0.701	0.944
1070	SCLT1_KAN619-3_3.tif:0006-0473	0.982	18.016	0	154	7.287	34.04	0.885	17.683	3405	1.189	0.841	0.938	0.11599	0.254093	1082	CEP170_KAN619-3_3.tif:0006-0473	0.982	155.323	0	489	7.287	34.04	0.885	152.45	29356	1.189	0.841	0.938
1071	SCLT1_KAN619-3_3.tif:0007-0614	1.309	23.806	0	96	11.709	44.294	0.734	31.154	5999	2.261	0.442	0.887	0.165586	0.447666	1083	CEP170_KAN619-3_3.tif:0007-0614	1.309	143.766	0	527	11.709	44.294	0.734	188.143	36229	2.261	0.442	0.887
1072	SCLT1_KAN619-3_3.tif:0008-0696	0.774	12.054	0	89	47.961	50.168	0.926	9.327	1796	1.047	0.955	0.955	0.0718745	0.134024	1084	CEP170_KAN619-3_3.tif:0008-0696	0.774	167.705	0	586	47.961	50.168	0.926	129.766	24988	1.047	0.955	0.955
1073	SCLT1_KAN619-3_3.tif:0009-0716	0.992	26.848	0	102	41.649	51.644	0.972	26.63	5128	1.175	0.851	0.941	0.153271	0.382669	1085	CEP170_KAN619-3_3.tif:0009-0716	0.992	175.168	0	568	41.649	51.644	0.972	173.747	33457	1.175	0.851	0.941
1074	SCLT1_KAN619-3_3.tif:0010-0752	0.971	19.503	0	85	26.665	54.265	0.888	18.939	3647	1.234	0.81	0.919	0.110807	0.272152	1086	CEP170_KAN619-3_3.tif:0010-0752	0.971	176.005	0	647	26.665	54.265	0.888	170.922	32913	1.234	0.81	0.919
1075	SCLT1_KAN619-3_3.tif:0011-0924	0.883	31.535	0	131	67.825	66.596	0.935	27.84	5361	1.159	0.863	0.955	0.190579	0.400056	1087	CEP170_KAN619-3_3.tif:0011-0924	0.883	165.471	0	618	67.825	66.596	0.935	146.083	28130	1.159	0.863	0.955
1076	SCLT1_KAN619-3_3.tif:0012-1064	0.852	17.665	0	80	20.801	76.655	0.728	15.045	2897	1.598	0.626	0.843	0.15943	0.216184	1088	CEP170_KAN619-3_3.tif:0012-1064	0.852	110.799	0	446	20.801	76.655	0.728	94.365	18171	1.598	0.626	0.843
1089	SCLT1_KAN619-3_4.tif:0001-0064	0.54	5.596	0	27	87.731	4.607	0.969	3.022	582	1.108	0.903	0.977	0.0411046	0.0434309	1103	CEP170_KAN619-3_4.tif:0001-0064	0.54	136.144	0	474	87.731	4.607	0.969	73.53	14159	1.108	0.903	0.977
1090	SCLT1_KAN619-3_4.tif:0002-0107	0.852	6.97	0	39	8.3	7.713	0.872	5.936	1143	1.593	0.628	0.934	0.0523543	0.0852946	1104	CEP170_KAN619-3_4.tif:0002-0107	0.852	133.122	0	432	8.3	7.713	0.872	113.377	21832	1.593	0.628	0.934
1091	SCLT1_KAN619-3_4.tif:0003-0241	1.366	20.996	0	226	35.879	17.43	0.843	28.677	5522	1.593	0.628	0.946	0.0920886	0.412071	1105	CEP170_KAN619-3_4.tif:0003-0241	1.366	228	0	1048	35.879	17.43	0.843	311.402	59964	1.593	0.628	0.946
1092	SCLT1_KAN619-3_4.tif:0004-0586	1.215	23.675	0	146	42.026	42.292	0.848	28.77	5540	1.514	0.66	0.923	0.125663	0.413414	1106	CEP170_KAN619-3_4.tif:0004-0586	1.215	188.402	0	784	42.026	42.292	0.848	228.945	44086	1.514	0.66	0.923
1093	SCLT1_KAN619-3_4.tif:0005-0619	1.023	27.381	0	163	69.181	44.652	0.866	28.012	5394	1.518	0.659	0.929	0.186399	0.402519	1107	CEP170_KAN619-3_4.tif:0005-0619	1.023	146.893	0	513	69.181	44.652	0.866	150.279	28938	1.518	0.659	0.929
1094	SCLT1_KAN619-3_4.tif:0006-0641	0.545	149.943	0	437	68.347	46.229	0.703	81.761	15744	2.185	0.458	0.875	21.7159	1.17487	1108	CEP170_KAN619-3_4.tif:0006-0641	0.545	6.905	0	35	68.347	46.229	0.703	3.765	725	2.185	0.458	0.875
1095	SCLT1_KAN619-3_4.tif:0007-0685	0.639	20.35	0	109	89.715	49.431	0.745	12.998	2503	2.025	0.494	0.918	0.182941	0.186783	1109	CEP170_KAN619-3_4.tif:0007-0685	0.639	111.236	10	247	89.715	49.431	0.745	71.053	13682	2.025	0.494	0.918
1096	SCLT1_KAN619-3_4.tif:0008-0732	1.158	31.565	0	136	71.527	52.696	0.832	36.555	7039	1.505	0.664	0.937	0.179155	0.525275	1110	CEP170_KAN619-3_4.tif:0008-0732	1.158	176.188	0	682	71.527	52.696	0.832	204.039	39290	1.505	0.664	0.937
1097	SCLT1_KAN619-3_4.tif:0009-0840	1.059	13.206	0	57	19.604	60.491	0.87	13.99	2694	1.291	0.775	0.919	0.0963899	0.201036	1111	CEP170_KAN619-3_4.tif:0009-0840	1.059	137.005	0	349	19.604	60.491	0.87	145.143	27949	1.291	0.775	0.919
1098	SCLT1_KAN619-3_4.tif:0010-0981	0.904	27.874	0	194	53.736	70.72	0.957	25.187	4850	1.185	0.844	0.967	0.106586	0.361924	1112	CEP170_KAN619-3_4.tif:0010-0981	0.904	261.511	0	1302	53.736	70.72	0.957	236.304	45503	1.185	0.844	0.967
1099	SCLT1_KAN619-3_4.tif:0011-1093	0.878	33.107	0	183	73.092	78.76	0.856	29.056	5595	1.163	0.86	0.923	0.223202	0.417518	1113	CEP170_KAN619-3_4.tif:0011-1093	0.878	148.325	0	547	73.092	78.76	0.856	130.177	25067	1.163	0.86	0.923
1100	SCLT1_KAN619-3_4.tif:0012-1157	0.8	22.916	0	165	63.542	83.388	0.868	18.327	3529	1.484	0.674	0.922	0.205725	0.263346	1114	CEP170_KAN619-3_4.tif:0012-1157	0.8	111.39	0	324	63.542	83.388	0.868	89.083	17154	1.484	0.674	0.922
1101	SCLT1_KAN619-3_4.tif:0013-1263	0.831	14.569	0	95	28.339	91.016	0.902	12.105	2331	1.155	0.866	0.92	0.117425	0.173947	1115	CEP170_KAN619-3_4.tif:0013-1263	0.831	124.069	0	344	28.339	91.016	0.902	103.089	19851	1.155	0.866	0.92
1102	SCLT1_KAN619-3_4.tif:0014-1267	0.737	22.423	0	175	18.917	91.284	0.789	16.535	3184	1.206	0.829	0.887	0.20443	0.237601	1116	CEP170_KAN619-3_4.tif:0014-1267	0.737	109.683	0	368	18.917	91.284	0.789	80.883	15575	1.206	0.829	0.887
1117	SCLT1_KAN619-3_5.tif:0001-0197	0.976	18.84	0	133	42.666	14.189	0.913	18.394	3542	1.121	0.892	0.926	0.10479	0.264316	1131	CEP170_KAN619-3_5.tif:0001-0197	0.976	179.793	0	639	42.666	14.189	0.913	175.534	33801	1.121	0.892	0.926
1118	SCLT1_KAN619-3_5.tif:0002-0201	1.132	21.477	0	164	78.41	14.47	0.83	24.314	4682	1.604	0.623	0.938	0.12474	0.349387	1132	CEP170_KAN619-3_5.tif:0002-0201	1.132	172.174	0	575	78.41	14.47	0.83	194.92	37534	1.604	0.623	0.938
1119	SCLT1_KAN619-3_5.tif:0003-0238	1.023	20.497	0	136	10.176	17.151	0.83	20.97	4038	1.499	0.667	0.923	0.131266	0.30133	1133	CEP170_KAN619-3_5.tif:0003-0238	1.023	156.152	0	634	10.176	17.151	0.83	159.752	30762	1.499	0.667	0.923
1120	SCLT1_KAN619-3_5.tif:0004-0351	0.717	13.812	0	69	16.312	25.305	0.836	9.898	1906	1.924	0.52	0.955	0.116532	0.142232	1134	CEP170_KAN619-3_5.tif:0004-0351	0.717	118.522	0	338	16.312	25.305	0.836	84.939	16356	1.924	0.52	0.955
1121	SCLT1_KAN619-3_5.tif:0005-0451	1.345	10.058	0	96	33.009	32.563	0.823	13.528	2605	1.749	0.572	0.928	0.0849503	0.194394	1135	CEP170_KAN619-3_5.tif:0005-0451	1.345	118.398	0	526	33.009	32.563	0.823	159.248	30665	1.749	0.572	0.928
1122	SCLT1_KAN619-3_5.tif:0006-0541	0.836	13.839	0	115	57.395	38.966	0.873	11.57	2228	1.3	0.769	0.955	0.0974841	0.166261	1136	CEP170_KAN619-3_5.tif:0006-0541	0.836	141.957	0	449	57.395	38.966	0.873	118.689	22855	1.3	0.769	0.955
1123	SCLT1_KAN619-3_5.tif:0007-0549	0.711	6.219	0	56	19.633	39.573	0.907	4.425	852	1.167	0.857	0.955	0.0438565	0.0635792	1137	CEP170_KAN619-3_5.tif:0007-0549	0.711	141.803	0	449	19.633	39.573	0.907	100.887	19427	1.167	0.857	0.955
1124	SCLT1_KAN619-3_5.tif:0008-0623	0.867	11.395	0	60	81.672	44.896	0.765	9.883	1903	1.435	0.697	0.881	0.104354	0.142008	1138	CEP170_KAN619-3_5.tif:0008-0623	0.867	109.198	0	273	81.672	44.896	0.765	94.702	18236	1.435	0.697	0.881
1125	SCLT1_KAN619-3_5.tif:0009-0648	0.613	15.619	0	84	40.344	46.732	0.976	9.571	1843	1.12	0.893	0.955	0.108802	0.137531	1139	CEP170_KAN619-3_5.tif:0009-0648	0.613	143.551	0	562	40.344	46.732	0.976	87.967	16939	1.12	0.893	0.955
1126	SCLT1_KAN619-3_5.tif:0010-0772	0.924	16.444	0	87	12.585	55.68	0.893	15.2	2927	1.378	0.726	0.93	0.0912207	0.218423	1140	CEP170_KAN619-3_5.tif:0010-0772	0.924	180.264	0	623	12.585	55.68	0.893	166.633	32087	1.378	0.726	0.93
1127	SCLT1_KAN619-3_5.tif:0011-0866	0.904	16.69	0	104	63.138	62.435	0.894	15.081	2904	1.116	0.896	0.921	0.100974	0.216707	1141	CEP170_KAN619-3_5.tif:0011-0866	0.904	165.287	0	659	63.138	62.435	0.894	149.355	28760	1.116	0.896	0.921
1128	SCLT1_KAN619-3_5.tif:0012-0916	1.054	35.182	0	162	46.165	65.998	0.946	37.089	7142	1.122	0.891	0.921	0.196917	0.532961	1142	CEP170_KAN619-3_5.tif:0012-0916	1.054	178.665	0	689	46.165	65.998	0.946	188.35	36269	1.122	0.891	0.921
1129	SCLT1_KAN619-3_5.tif:0013-0982	0.696	12.306	0	77	32.451	70.78	0.937	8.563	1649	1.322	0.756	0.95	0.0975393	0.123054	1143	CEP170_KAN619-3_5.tif:0013-0982	0.696	126.164	0	369	32.451	70.78	0.937	87.795	16906	1.322	0.756	0.95
1130	SCLT1_KAN619-3_5.tif:0014-1138	0.685	9.591	0	53	7.096	81.982	0.865	6.575	1266	1.299	0.77	0.907	0.0842147	0.0944733	1144	CEP170_KAN619-3_5.tif:0014-1138	0.685	113.886	0	332	7.096	81.982	0.865	78.069	15033	1.299	0.77	0.907
1145	SCLT1_KAN619-3_6.tif:0001-0178	1.018	10.607	0	75	60.694	12.819	0.843	10.797	2079	1.235	0.81	0.912	0.0619598	0.155142	1152	CEP170_KAN619-3_6.tif:0001-0178	1.018	171.194	0	707	60.694	12.819	0.843	174.251	33554	1.235	0.81	0.912
1146	SCLT1_KAN619-3_6.tif:0002-0220	0.737	222.169	0	701	31.458	15.888	0.797	163.833	31548	1.947	0.514	0.963		2.35422	1153	CEP170_KAN619-3_6.tif:0002-0220	0.737	3.507	0	18	31.458	15.888	0.797	2.586	498	1.947	0.514	0.963
1147	SCLT1_KAN619-3_6.tif:0003-0381	0.924	47.27	0	285	38.28	27.483	0.969	43.695	8414	1.228	0.814	0.954	0.253877	0.627882	1154	CEP170_KAN619-3_6.tif:0003-0381	0.924	186.191	0	745	38.28	27.483	0.969	172.111	33142	1.228	0.814	0.954
1148	SCLT1_KAN619-3_6.tif:0004-0556	0.743	23.825	0	179	26.291	40.09	0.815	17.693	3407	1.115	0.897	0.899	0.20444	0.254242	1155	CEP170_KAN619-3_6.tif:0004-0556	0.743	116.538	0	346	26.291	40.09	0.815	86.544	16665	1.115	0.897	0.899
1149	SCLT1_KAN619-3_6.tif:0005-0653	1.283	43.312	0	281	57.974	47.061	0.825	55.556	10698	1.175	0.851	0.887	0.268659	0.798322	1156	CEP170_KAN619-3_6.tif:0005-0653	1.283	161.215	0	501	57.974	47.061	0.825	206.791	39820	1.175	0.851	0.887
1150	SCLT1_KAN619-3_6.tif:0006-0911	1.101	19.844	0	133	66.156	65.615	0.866	21.848	4207	1.309	0.764	0.918	0.136858	0.313941	1157	CEP170_KAN619-3_6.tif:0006-0911	1.101	145	0	505	66.156	65.615	0.866	159.637	30740	1.309	0.764	0.918
1151	SCLT1_KAN619-3_6.tif:0007-1036	0.867	23.491	0	231	33.605	74.631	0.875	20.373	3923	1.375	0.728	0.944	0.185669	0.292748	1158	CEP170_KAN619-3_6.tif:0007-1036	0.867	126.521	0	487	33.605	74.631	0.875	109.726	21129	1.375	0.728	0.944
									AVERAGE	4748.91			AVERAGE	0.500691	0.35438
									SEM	628.842			SEM	0.39317
										1.34645e-14
1159	SCLT1_KAN619-4_1.tif:0001-0245	0.753	15.4	0	52	80.769	17.659	0.847	11.596	2233	1.344	0.744	0.909	0.113575	0.166634	1167	CEP170_KAN619-4_1.tif:0001-0245	0.753	135.593	0	472	80.769	17.659	0.847	102.102	19661	1.344	0.744	0.909
1160	SCLT1_KAN619-4_1.tif:0002-0411	1.08	10.986	0	75	37.828	29.613	0.825	11.866	2285	1.186	0.843	0.887	0.083718	0.170515	1168	CEP170_KAN619-4_1.tif:0002-0411	1.08	131.221	0	366	37.828	29.613	0.825	141.742	27294	1.186	0.843	0.887
1161	SCLT1_KAN619-4_1.tif:0003-0541	0.94	10.591	0	81	24.835	38.992	0.803	9.955	1917	1.331	0.752	0.892	0.0866597	0.143053	1169	CEP170_KAN619-4_1.tif:0003-0541	0.94	122.215	0	336	24.835	38.992	0.803	114.878	22121	1.331	0.752	0.892
1162	SCLT1_KAN619-4_1.tif:0004-0704	1.059	24.27	0	128	70.728	50.765	0.859	25.711	4951	1.086	0.921	0.915	0.13611	0.369461	1170	CEP170_KAN619-4_1.tif:0004-0704	1.059	178.309	0	698	70.728	50.765	0.859	188.901	36375	1.086	0.921	0.915
1163	SCLT1_KAN619-4_1.tif:0005-0773	0.795	16.778	0	91	8.938	55.697	0.821	13.331	2567	1.369	0.73	0.897	0.15017	0.191558	1171	CEP170_KAN619-4_1.tif:0005-0773	0.795	111.725	0	348	8.938	55.697	0.821	88.772	17094	1.369	0.73	0.897
1164	SCLT1_KAN619-4_1.tif:0006-0828	0.758	8.719	0	49	41.872	59.64	0.884	6.611	1273	1.166	0.858	0.939	0.0696428	0.0949957	1172	CEP170_KAN619-4_1.tif:0006-0828	0.758	125.199	0	326	41.872	59.64	0.884	94.926	18279	1.166	0.858	0.939
1165	SCLT1_KAN619-4_1.tif:0007-0892	1.039	26.565	0	162	53.612	64.247	0.817	27.591	5313	1.585	0.631	0.924	0.179639	0.396475	1173	CEP170_KAN619-4_1.tif:0007-0892	1.039	147.88	0	584	53.612	64.247	0.817	153.593	29576	1.585	0.631	0.924
1166	SCLT1_KAN619-4_1.tif:0008-1218	0.956	18.027	0	147	80.956	87.77	0.799	17.226	3317	1.633	0.612	0.918	0.169998	0.247526	1174	CEP170_KAN619-4_1.tif:0008-1218	0.956	106.043	0	367	80.956	87.77	0.799	101.329	19512	1.633	0.612	0.918
1175	SCLT1_KAN619-4_2.tif:0001-0102	0.753	7.979	0	47	62.04	7.402	0.915	6.008	1157	1.278	0.782	0.927	0.0583724	0.0863394	1181	CEP170_KAN619-4_2.tif:0001-0102	0.753	136.697	0	434	62.04	7.402	0.915	102.933	19821	1.278	0.782	0.927
1176	SCLT1_KAN619-4_2.tif:0002-0259	0.696	26.993	0	137	23.613	18.667	0.855	18.784	3617	1.622	0.616	0.931	0.224296	0.269913	1182	CEP170_KAN619-4_2.tif:0002-0259	0.696	120.343	0	355	23.613	18.667	0.855	83.745	16126	1.622	0.616	0.931
1177	SCLT1_KAN619-4_2.tif:0003-0291	0.685	27.083	0	150	89.211	21.002	0.898	18.566	3575	1.283	0.78	0.953	0.224054	0.266779	1183	CEP170_KAN619-4_2.tif:0003-0291	0.685	120.879	0	364	89.211	21.002	0.898	82.862	15956	1.283	0.78	0.953
1178	SCLT1_KAN619-4_2.tif:0004-0306	0.987	11.268	0	49	44.149	22.093	0.818	11.119	2141	1.243	0.805	0.886	0.0929012	0.159769	1184	CEP170_KAN619-4_2.tif:0004-0306	0.987	121.295	0	367	44.149	22.093	0.818	119.681	23046	1.243	0.805	0.886
1179	SCLT1_KAN619-4_2.tif:0005-0672	0.784	12.291	0	143	20.067	48.38	0.783	9.638	1856	1.218	0.821	0.873	0.103387	0.138501	1185	CEP170_KAN619-4_2.tif:0005-0672	0.784	118.887	0	435	20.067	48.38	0.783	93.227	17952	1.218	0.821	0.873
1180	SCLT1_KAN619-4_2.tif:0006-1179	0.997	25.401	0	124	64.658	85.023	0.871	25.327	4877	1.456	0.687	0.939	0.173103	0.363939	1186	CEP170_KAN619-4_2.tif:0006-1179	0.997	146.74	0	520	64.658	85.023	0.871	146.312	28174	1.456	0.687	0.939
1187	SCLT1_KAN619-4_3.tif:0001-0460	0.769	16.547	0	97	41.258	33.147	0.776	12.718	2449	1.894	0.528	0.916	0.168745	0.182753	1195	CEP170_KAN619-4_3.tif:0001-0460	0.769	98.061	0	282	41.258	33.147	0.776	75.368	14513	1.894	0.528	0.916
1188	SCLT1_KAN619-4_3.tif:0002-0654	0.628	10.331	0	43	80.469	47.145	0.78	6.491	1250	1.967	0.508	0.927	0.100225	0.0932793	1196	CEP170_KAN619-4_3.tif:0002-0654	0.628	103.074	0	229	80.469	47.145	0.78	64.769	12472	1.967	0.508	0.927
1189	SCLT1_KAN619-4_3.tif:0003-0715	1.158	18.161	0	139	77.858	51.474	0.786	21.032	4050	1.469	0.681	0.875	0.113687	0.302225	1197	CEP170_KAN619-4_3.tif:0003-0715	1.158	159.749	0	541	77.858	51.474	0.786	185.001	35624	1.469	0.681	0.875
1190	SCLT1_KAN619-4_3.tif:0004-0754	0.774	6.268	0	36	2.757	54.28	0.82	4.85	934	1.159	0.863	0.884	0.05872	0.0696983	1198	CEP170_KAN619-4_3.tif:0004-0754	0.774	106.752	0	284	2.757	54.28	0.82	82.602	15906	1.159	0.863	0.884
1191	SCLT1_KAN619-4_3.tif:0005-0857	0.597	15.365	0	103	55.188	61.769	0.924	9.176	1767	1.077	0.928	0.947	0.133793	0.13186	1199	CEP170_KAN619-4_3.tif:0005-0857	0.597	114.843	0	263	55.188	61.769	0.924	68.586	13207	1.077	0.928	0.947
1192	SCLT1_KAN619-4_3.tif:0006-0963	0.821	18.335	0	133	38.828	69.338	0.73	15.045	2897	1.185	0.844	0.866	0.184229	0.216184	1200	CEP170_KAN619-4_3.tif:0006-0963	0.821	99.525	0	327	38.828	69.338	0.73	81.662	15725	1.185	0.844	0.866
1193	SCLT1_KAN619-4_3.tif:0007-1141	0.691	14.346	0	53	90.63	82.231	0.915	9.909	1908	1.053	0.95	0.971	0.107209	0.142382	1201	CEP170_KAN619-4_3.tif:0007-1141	0.691	133.812	0	429	90.63	82.231	0.915	92.422	17797	1.053	0.95	0.971
1194	SCLT1_KAN619-4_3.tif:0008-1207	0.582	13.857	0	55	52.142	86.99	0.927	8.06	1552	1.311	0.763	0.945	0.112439	0.115816	1202	CEP170_KAN619-4_3.tif:0008-1207	0.582	123.241	0	390	52.142	86.99	0.927	71.681	13803	1.311	0.763	0.945
1203	SCLT1_KAN619-4_4.tif:0001-0144	0.774	22.664	0	90	71.889	10.46	0.893	17.537	3377	1.281	0.78	0.94	0.188596	0.252003	1209	CEP170_KAN619-4_4.tif:0001-0144	0.774	120.174	0	348	71.889	10.46	0.893	92.988	17906	1.281	0.78	0.94
1204	SCLT1_KAN619-4_4.tif:0002-0321	1.039	22.675	0	99	27.774	23.16	0.919	23.551	4535	1.206	0.829	0.932	0.1145	0.338417	1210	CEP170_KAN619-4_4.tif:0002-0321	1.039	198.035	0	694	27.774	23.16	0.919	205.685	39607	1.206	0.829	0.932
1205	SCLT1_KAN619-4_4.tif:0003-0602	1.007	12.227	0	68	22.184	43.435	0.853	12.318	2372	1.247	0.802	0.911	0.0792383	0.177007	1211	CEP170_KAN619-4_4.tif:0003-0602	1.007	154.304	0	639	22.184	43.435	0.853	155.457	29935	1.247	0.802	0.911
1206	SCLT1_KAN619-4_4.tif:0004-0642	0.966	31.909	0	165	57.915	46.307	0.912	30.821	5935	1.338	0.747	0.947	0.147998	0.44289	1212	CEP170_KAN619-4_4.tif:0004-0642	0.966	215.602	0	865	57.915	46.307	0.912	208.256	40102	1.338	0.747	0.947
1207	SCLT1_KAN619-4_4.tif:0005-0860	0.68	11.55	0	78	91.728	62.014	0.814	7.857	1513	1.874	0.534	0.953	0.0762908	0.112905	1213	CEP170_KAN619-4_4.tif:0005-0860	0.68	151.389	0	441	91.728	62.014	0.814	102.99	19832	1.874	0.534	0.953
1208	SCLT1_KAN619-4_4.tif:0006-0930	0.769	25.162	0	150	24.348	67.032	0.874	19.339	3724	1.187	0.843	0.946	0.215111	0.277898	1214	CEP170_KAN619-4_4.tif:0006-0930	0.769	116.973	0	395	24.348	67.032	0.874	89.904	17312	1.187	0.843	0.946
1215	SCLT1_KAN619-4_5.tif:0001-0314	0.924	35.579	0	195	79.667	22.706	0.915	32.888	6333	1.11	0.901	0.925	0.257439	0.47259	1221	CEP170_KAN619-4_5.tif:0001-0314	0.924	138.202	0	458	79.667	22.706	0.915	127.751	24600	1.11	0.901	0.925
1216	SCLT1_KAN619-4_5.tif:0002-0339	0.945	10.56	0	78	52.589	24.407	0.884	9.981	1922	1.07	0.935	0.912	0.0835216	0.143426	1222	CEP170_KAN619-4_5.tif:0002-0339	0.945	126.44	0	378	52.589	24.407	0.884	119.505	23012	1.07	0.935	0.912
1217	SCLT1_KAN619-4_5.tif:0003-0631	0.561	155.63	8	443	84.422	45.472	0.661	87.286	16808	2.157	0.464	0.837	25.5441	1.25427	1223	CEP170_KAN619-4_5.tif:0003-0631	0.561	6.093	0	24	84.422	45.472	0.661	3.417	658	2.157	0.464	0.837
1218	SCLT1_KAN619-4_5.tif:0004-0723	0.758	28.712	0	115	58.34	52.114	0.931	21.77	4192	1.16	0.862	0.951	0.193724	0.312822	1224	CEP170_KAN619-4_5.tif:0004-0723	0.758	148.212	0	485	58.34	52.114	0.931	112.375	21639	1.16	0.862	0.951
1219	SCLT1_KAN619-4_5.tif:0005-0959	0.95	7.929	0	46	57.918	69.102	0.857	7.535	1451	1.129	0.886	0.915	0.0493118	0.108279	1225	CEP170_KAN619-4_5.tif:0005-0959	0.95	160.792	0	482	57.918	69.102	0.857	152.808	29425	1.129	0.886	0.915
1220	SCLT1_KAN619-4_5.tif:0006-0980	0.748	14.41	0	68	18.179	70.67	0.909	10.776	2075	1.265	0.791	0.923	0.11558	0.154844	1226	CEP170_KAN619-4_5.tif:0006-0980	0.748	124.674	0	362	18.179	70.67	0.909	93.233	17953	1.265	0.791	0.923
1227	SCLT1_KAN619-4_6.tif:0001-0058	0.727	12.164	0	74	69.712	4.206	0.809	8.844	1703	1.325	0.755	0.862	0.111767	0.127084	1235	CEP170_KAN619-4_6.tif:0001-0058	0.727	108.836	0	254	69.712	4.206	0.809	79.128	15237	1.325	0.755	0.862
1228	SCLT1_KAN619-4_6.tif:0002-0297	0.763	18.041	0	132	36.75	21.395	0.913	13.772	2652	1.166	0.858	0.945	0.129619	0.197901	1236	CEP170_KAN619-4_6.tif:0002-0297	0.763	139.184	0	414	36.75	21.395	0.913	106.252	20460	1.166	0.858	0.945
1229	SCLT1_KAN619-4_6.tif:0003-0338	0.846	13.485	0	93	55.496	24.352	0.966	11.415	2198	1.109	0.902	0.945	0.0970077	0.164022	1237	CEP170_KAN619-4_6.tif:0003-0338	0.846	139.006	0	382	55.496	24.352	0.966	117.666	22658	1.109	0.902	0.945
1230	SCLT1_KAN619-4_6.tif:0004-0408	0.602	6.621	0	33	78.219	29.448	0.868	3.988	768	1.273	0.786	0.917	0.0651455	0.0573108	1238	CEP170_KAN619-4_6.tif:0004-0408	0.602	101.629	0	231	78.219	29.448	0.868	61.222	11789	1.273	0.786	0.917
1231	SCLT1_KAN619-4_6.tif:0005-0612	0.831	10.4	0	73	52.244	44.092	0.889	8.641	1664	1.174	0.852	0.955	0.0515569	0.124173	1239	CEP170_KAN619-4_6.tif:0005-0612	0.831	201.719	0	764	52.244	44.092	0.889	167.609	32275	1.174	0.852	0.955
1232	SCLT1_KAN619-4_6.tif:0006-0846	1.002	35.653	0	187	84.185	60.927	0.83	35.734	6881	1.763	0.567	0.932	0.229221	0.513484	1240	CEP170_KAN619-4_6.tif:0006-0846	1.002	155.539	0	537	84.185	60.927	0.83	155.893	30019	1.763	0.567	0.932
1233	SCLT1_KAN619-4_6.tif:0007-0915	1.059	15.5	0	120	68.869	65.959	0.897	16.421	3162	1.314	0.761	0.938	0.0920873	0.235959	1241	CEP170_KAN619-4_6.tif:0007-0915	1.059	168.319	0	650	68.869	65.959	0.897	178.317	34337	1.314	0.761	0.938
1234	SCLT1_KAN619-4_6.tif:0008-0991	0.535	175.893	0	509	86.525	71.431	0.874	94.084	18117	1.359	0.736	0.981	28.1757	1.35195	1242	CEP170_KAN619-4_6.tif:0008-0991	0.535	6.243	0	29	86.525	71.431	0.874	3.339	643	1.359	0.736	0.981
1243	SCLT1_KAN619-4_7.tif:0001-0168	0.525	5.703	0	30	22.354	12.143	0.811	2.991	576	1.915	0.522	0.91	0.0620155	0.0429831	1253	CEP170_KAN619-4_7.tif:0001-0168	0.525	91.96	0	224	22.354	12.143	0.811	48.234	9288	1.915	0.522	0.91
1244	SCLT1_KAN619-4_7.tif:0002-0197	0.904	7.207	0	38	63.283	14.215	0.826	6.512	1254	1.257	0.796	0.874	0.0590674	0.0935778	1254	CEP170_KAN619-4_7.tif:0002-0197	0.904	122.011	0	320	63.283	14.215	0.826	110.251	21230	1.257	0.796	0.874
1245	SCLT1_KAN619-4_7.tif:0003-0208	0.769	22.581	0	99	14.036	14.997	0.896	17.355	3342	1.203	0.831	0.949	0.192523	0.249392	1255	CEP170_KAN619-4_7.tif:0003-0208	0.769	117.291	0	325	14.036	14.997	0.896	90.148	17359	1.203	0.831	0.949
1246	SCLT1_KAN619-4_7.tif:0004-0485	0.909	7.52	0	67	87.853	34.991	0.908	6.834	1316	1.214	0.824	0.943	0.0477937	0.0982045	1256	CEP170_KAN619-4_7.tif:0004-0485	0.909	157.343	0	517	87.853	34.991	0.908	142.993	27535	1.214	0.824	0.943
1247	SCLT1_KAN619-4_7.tif:0005-0511	0.587	11.159	0	75	25.161	36.82	0.8	6.549	1261	1.721	0.581	0.919	0.115826	0.0941002	1257	CEP170_KAN619-4_7.tif:0005-0511	0.587	96.345	0	231	25.161	36.82	0.8	56.538	10887	1.721	0.581	0.919
1248	SCLT1_KAN619-4_7.tif:0006-0761	0.613	11.254	0	62	17.838	54.866	0.733	6.896	1328	1.852	0.54	0.849	0.108444	0.0991	1258	CEP170_KAN619-4_7.tif:0006-0761	0.613	103.78	0	280	17.838	54.866	0.733	63.595	12246	1.852	0.54	0.849
1249	SCLT1_KAN619-4_7.tif:0007-0804	1.205	38.513	0	231	67.453	57.944	0.809	46.401	8935	1.198	0.835	0.892	0.271944	0.666761	1259	CEP170_KAN619-4_7.tif:0007-0804	1.205	141.621	0	508	67.453	57.944	0.809	170.626	32856	1.198	0.835	0.892
1250	SCLT1_KAN619-4_7.tif:0008-0860	0.639	11.659	0	75	59.337	62.018	0.729	7.447	1434	2.414	0.414	0.875	0.128968	0.10701	1260	CEP170_KAN619-4_7.tif:0008-0860	0.639	90.398	0	208	59.337	62.018	0.729	57.743	11119	2.414	0.414	0.875
1251	SCLT1_KAN619-4_7.tif:0009-1007	0.68	8.191	0	55	26.702	72.589	0.892	5.572	1073	1.295	0.772	0.932	0.0676417	0.080071	1261	CEP170_KAN619-4_7.tif:0009-1007	0.68	121.092	0	375	26.702	72.589	0.892	82.379	15863	1.295	0.772	0.932
1252	SCLT1_KAN619-4_7.tif:0010-1134	0.628	9.107	0	72	9.83	81.693	0.88	5.723	1102	1.458	0.686	0.945	0.0812265	0.0822351	1262	CEP170_KAN619-4_7.tif:0010-1134	0.628	112.124	0	371	9.83	81.693	0.88	70.455	13567	1.458	0.686	0.945
									AVERAGE	3286.33					0.245237
									SEM	464.029
										1.80671e-18
1263	SCLT1_KAN619-5_1.tif:0001-0283	0.914	66.841	0	247	25.21	20.399	0.901	61.092	11764	1.299	0.77	0.962	0.401803	0.877871	1272	CEP170_KAN619-5_1.tif:0001-0283	0.914	166.352	0	529	25.21	20.399	0.901	152.045	29278	1.299	0.77	0.962
1264	SCLT1_KAN619-5_1.tif:0002-0288	1.049	91.287	0	435	68.403	20.811	0.718	95.762	18440	1.854	0.539	0.861	1.1308	1.37606	1273	CEP170_KAN619-5_1.tif:0002-0288	1.049	80.728	0	258	68.403	20.811	0.718	84.685	16307	1.854	0.539	0.861
1265	SCLT1_KAN619-5_1.tif:0003-0420	0.94	77.779	0	324	89.849	30.272	0.829	73.109	14078	1.286	0.778	0.912	0.648009	1.05055	1274	CEP170_KAN619-5_1.tif:0003-0420	0.94	120.028	0	359	89.849	30.272	0.829	112.821	21725	1.286	0.778	0.912
1266	SCLT1_KAN619-5_1.tif:0004-0666	0.706	10.331	0	83	65.778	48.032	0.891	7.296	1405	1.457	0.686	0.928	0.0892914	0.104846	1275	CEP170_KAN619-5_1.tif:0004-0666	0.706	115.699	0	260	65.778	48.032	0.891	81.714	15735	1.457	0.686	0.928
1267	SCLT1_KAN619-5_1.tif:0005-0720	1.091	38.014	0	218	24.106	51.877	0.861	41.457	7983	1.555	0.643	0.903	0.283387	0.595719	1276	CEP170_KAN619-5_1.tif:0005-0720	1.091	134.143	0	434	24.106	51.877	0.861	146.291	28170	1.555	0.643	0.903
1268	SCLT1_KAN619-5_1.tif:0006-0742	1.205	57.28	0	401	79.02	53.491	0.883	69.012	13289	1.158	0.863	0.93	0.386983	0.991671	1277	CEP170_KAN619-5_1.tif:0006-0742	1.205	148.017	0	730	79.02	53.491	0.883	178.333	34340	1.158	0.863	0.93
1269	SCLT1_KAN619-5_1.tif:0007-0788	0.945	50.165	0	247	1.744	56.821	0.905	47.413	9130	1.274	0.785	0.919	0.320149	0.681312	1278	CEP170_KAN619-5_1.tif:0007-0788	0.945	156.692	0	528	1.744	56.821	0.905	148.098	28518	1.274	0.785	0.919
1270	SCLT1_KAN619-5_1.tif:0008-0960	0.769	45.973	0	203	21.677	69.183	0.92	35.334	6804	1.186	0.843	0.946	0.389356	0.507738	1279	CEP170_KAN619-5_1.tif:0008-0960	0.769	118.074	0	332	21.677	69.183	0.92	90.75	17475	1.186	0.843	0.946
1271	SCLT1_KAN619-5_1.tif:0009-0965	0.982	61.545	0	366	62.359	69.552	0.858	60.407	11632	1.166	0.858	0.913	0.572272	0.86802	1280	CEP170_KAN619-5_1.tif:0009-0965	0.982	107.545	0	363	62.359	69.552	0.858	105.556	20326	1.166	0.858	0.913
1281	SCLT1_KAN619-5_2.tif:0001-0130	0.862	69.928	0	429	60.285	9.379	0.891	60.282	11608	1.17	0.854	0.941	0.563276	0.866229	1289	CEP170_KAN619-5_2.tif:0001-0130	0.862	124.145	0	533	60.285	9.379	0.891	107.02	20608	1.17	0.854	0.941
1282	SCLT1_KAN619-5_2.tif:0002-0169	1.117	54.688	0	425	86.764	12.168	0.818	61.061	11758	1.668	0.599	0.923	0.404597	0.877423	1290	CEP170_KAN619-5_2.tif:0002-0169	1.117	135.167	0	396	86.764	12.168	0.818	150.918	29061	1.668	0.599	0.923
1283	SCLT1_KAN619-5_2.tif:0003-0344	0.961	48.762	0	340	9.694	24.748	0.796	46.847	9021	1.729	0.578	0.907	0.391758	0.673178	1291	CEP170_KAN619-5_2.tif:0003-0344	0.961	124.47	0	385	9.694	24.748	0.796	119.583	23027	1.729	0.578	0.907
1284	SCLT1_KAN619-5_2.tif:0004-0452	0.805	60.594	0	288	61.163	32.565	0.874	48.774	9392	1.24	0.807	0.906	0.498302	0.700864	1292	CEP170_KAN619-5_2.tif:0004-0452	0.805	121.6	0	318	61.163	32.565	0.874	97.88	18848	1.24	0.807	0.906
1285	SCLT1_KAN619-5_2.tif:0005-0775	0.909	57.034	0	287	9.022	55.87	0.878	51.833	9981	1.216	0.822	0.911	0.361657	0.744817	1293	CEP170_KAN619-5_2.tif:0005-0775	0.909	157.703	0	558	9.022	55.87	0.878	143.32	27598	1.216	0.822	0.911
1286	SCLT1_KAN619-5_2.tif:0006-0885	0.696	17.522	0	125	52.063	63.795	0.937	12.194	2348	1.097	0.911	0.957	0.127159	0.175216	1294	CEP170_KAN619-5_2.tif:0006-0885	0.696	137.799	0	439	52.063	63.795	0.937	95.891	18465	1.097	0.911	0.957
1287	SCLT1_KAN619-5_2.tif:0007-0929	0.904	94.391	0	567	78.767	66.99	0.912	85.292	16424	1.188	0.842	0.956	0.574447	1.22562	1295	CEP170_KAN619-5_2.tif:0007-0929	0.904	164.316	0	701	78.767	66.99	0.912	148.477	28591	1.188	0.842	0.956
1288	SCLT1_KAN619-5_2.tif:0008-1187	0.644	72.315	0	345	63.018	85.548	0.892	46.567	8967	1.702	0.588	0.943	0.648561	0.669149	1296	CEP170_KAN619-5_2.tif:0008-1187	0.644	111.5	0	286	63.018	85.548	0.892	71.8	13826	1.702	0.588	0.943
1297	SCLT1_KAN619-5_3.tif:0001-0044	1.08	75.293	0	368	61.005	3.194	0.808	81.33	15661	1.681	0.595	0.904	0.745833	1.16868	1307	CEP170_KAN619-5_3.tif:0001-0044	1.08	100.952	0	369	61.005	3.194	0.808	109.046	20998	1.681	0.595	0.904
1298	SCLT1_KAN619-5_3.tif:0002-0222	0.971	32.695	0	200	48.847	16.018	0.841	31.751	6114	1.351	0.74	0.908	0.253777	0.456248	1308	CEP170_KAN619-5_3.tif:0002-0222	0.971	128.834	0	326	48.847	16.018	0.841	125.113	24092	1.351	0.74	0.908
1299	SCLT1_KAN619-5_3.tif:0003-0361	0.67	30.031	0	122	2.568	26.053	0.854	20.118	3874	1.397	0.716	0.918	0.305641	0.289091	1309	CEP170_KAN619-5_3.tif:0003-0361	0.67	98.256	0	339	2.568	26.053	0.854	65.823	12675	1.397	0.716	0.918
1300	SCLT1_KAN619-5_3.tif:0004-0412	1.122	59.894	0	452	37.547	29.694	0.857	67.184	12937	1.625	0.615	0.917	0.411129	0.965404	1310	CEP170_KAN619-5_3.tif:0004-0412	1.122	145.681	0	497	37.547	29.694	0.857	163.413	31467	1.625	0.615	0.917
1301	SCLT1_KAN619-5_3.tif:0005-0418	1.2	46.121	0	395	75.88	30.114	0.815	55.328	10654	1.134	0.882	0.888	0.269612	0.795038	1311	CEP170_KAN619-5_3.tif:0005-0418	1.2	171.065	0	702	75.88	30.114	0.815	205.212	39516	1.134	0.882	0.888
1302	SCLT1_KAN619-5_3.tif:0006-0456	1.132	87.317	0	462	67.596	32.925	0.862	98.852	19035	1.306	0.766	0.954	0.742742	1.42046	1312	CEP170_KAN619-5_3.tif:0006-0456	1.132	117.56	0	391	67.596	32.925	0.862	133.09	25628	1.306	0.766	0.954
1303	SCLT1_KAN619-5_3.tif:0007-0669	0.696	48.313	0	172	38.539	48.227	0.964	33.62	6474	1.092	0.916	0.947	0.349059	0.483112	1313	CEP170_KAN619-5_3.tif:0007-0669	0.696	138.41	0	416	38.539	48.227	0.964	96.317	18547	1.092	0.916	0.947
1304	SCLT1_KAN619-5_3.tif:0008-0778	0.67	14.178	0	57	43.918	56.097	0.939	9.498	1829	1.265	0.79	0.963	0.110547	0.136486	1314	CEP170_KAN619-5_3.tif:0008-0778	0.67	128.256	0	355	43.918	56.097	0.939	85.921	16545	1.265	0.79	0.963
1305	SCLT1_KAN619-5_3.tif:0009-0813	0.982	67.508	0	506	28.927	58.582	0.779	66.259	12759	1.286	0.777	0.881	0.760188	0.952121	1315	CEP170_KAN619-5_3.tif:0009-0813	0.982	88.804	0	283	28.927	58.582	0.779	87.162	16784	1.286	0.777	0.881
1306	SCLT1_KAN619-5_3.tif:0010-1048	1.111	75.15	0	485	65.027	75.491	0.808	83.516	16082	1.539	0.65	0.89	0.869391	1.20009	1316	CEP170_KAN619-5_3.tif:0010-1048	1.111	86.439	0	400	65.027	75.491	0.808	96.063	18498	1.539	0.65	0.89
1317	SCLT1_KAN619-5_4.tif:0001-0208	1.142	94.782	0	767	26.673	14.993	0.91	108.287	20852	1.136	0.88	0.919	0.615448	1.55605	1327	CEP170_KAN619-5_4.tif:0001-0208	1.142	154.005	0	614	26.673	14.993	0.91	175.949	33881	1.136	0.88	0.919
1318	SCLT1_KAN619-5_4.tif:0002-0222	0.945	90.011	0	472	77.444	15.968	0.699	85.074	16382	1.781	0.562	0.835	1.06184	1.22248	1328	CEP170_KAN619-5_4.tif:0002-0222	0.945	84.769	0	315	77.444	15.968	0.699	80.12	15428	1.781	0.562	0.835
1319	SCLT1_KAN619-5_4.tif:0003-0270	1.532	65.641	0	725	42.625	19.438	0.683	100.56	19364	2.115	0.473	0.866	0.620383	1.44501	1329	CEP170_KAN619-5_4.tif:0003-0270	1.532	105.807	0	532	42.625	19.438	0.683	162.094	31213	2.115	0.473	0.866
1320	SCLT1_KAN619-5_4.tif:0004-0472	1.21	76.073	0	430	72.114	33.983	0.747	92.049	17725	2.146	0.466	0.923	0.913613	1.3227	1330	CEP170_KAN619-5_4.tif:0004-0472	1.21	83.266	0	306	72.114	33.983	0.747	100.752	19401	2.146	0.466	0.923
1321	SCLT1_KAN619-5_4.tif:0005-0702	1.376	73.717	0	466	64.556	50.612	0.833	101.448	19535	1.226	0.816	0.923	0.524148	1.45777	1331	CEP170_KAN619-5_4.tif:0005-0702	1.376	140.642	0	547	64.556	50.612	0.833	193.549	37270	1.226	0.816	0.923
1322	SCLT1_KAN619-5_4.tif:0006-0716	1.241	62.184	0	345	45.3	51.64	0.811	77.181	14862	1.471	0.68	0.905	0.364819	1.10905	1332	CEP170_KAN619-5_4.tif:0006-0716	1.241	170.452	0	690	45.3	51.64	0.811	211.558	40738	1.471	0.68	0.905
1323	SCLT1_KAN619-5_4.tif:0007-0771	1.189	18.812	0	187	16.983	55.583	0.814	22.372	4308	1.445	0.692	0.898	0.135989	0.321478	1333	CEP170_KAN619-5_4.tif:0007-0771	1.189	138.336	0	473	16.983	55.583	0.814	164.514	31679	1.445	0.692	0.898
1324	SCLT1_KAN619-5_4.tif:0008-0933	1.179	79.952	0	715	68.756	67.22	0.9	94.25	18149	1.336	0.749	0.928	0.637232	1.35434	1334	CEP170_KAN619-5_4.tif:0008-0933	1.179	125.467	0	560	68.756	67.22	0.9	147.906	28481	1.336	0.749	0.928
1325	SCLT1_KAN619-5_4.tif:0009-1093	0.592	22.991	0	69	34.34	78.746	0.932	13.611	2621	1.136	0.88	0.908	0.213994	0.195588	1335	CEP170_KAN619-5_4.tif:0009-1093	0.592	107.439	0	271	34.34	78.746	0.932	63.606	12248	1.136	0.88	0.908
1326	SCLT1_KAN619-5_4.tif:0010-1259	0.919	61.927	0	499	76.134	90.715	0.909	56.922	10961	1.226	0.816	0.924	0.489746	0.817948	1336	CEP170_KAN619-5_4.tif:0010-1259	0.919	126.446	0	345	76.134	90.715	0.909	116.228	22381	1.226	0.816	0.924
1337	SCLT1_KAN619-5_5.tif:0001-0083	1.288	58.996	0	449	82.826	5.98	0.81	75.981	14631	1.244	0.804	0.9	0.535699	1.09182	1347	CEP170_KAN619-5_5.tif:0001-0083	1.288	110.129	0	406	82.826	5.98	0.81	141.835	27312	1.244	0.804	0.9
1338	SCLT1_KAN619-5_5.tif:0002-0238	0.867	67.946	0	415	61.186	17.2	0.884	58.927	11347	1.156	0.865	0.96	0.646958	0.846753	1348	CEP170_KAN619-5_5.tif:0002-0238	0.867	105.024	0	282	61.186	17.2	0.884	91.083	17539	1.156	0.865	0.96
1339	SCLT1_KAN619-5_5.tif:0003-0383	0.852	59.89	0	314	41.698	27.611	0.925	51.007	9822	1.104	0.906	0.948	0.393084	0.732952	1349	CEP170_KAN619-5_5.tif:0003-0383	0.852	152.36	0	539	41.698	27.611	0.925	129.761	24987	1.104	0.906	0.948
1340	SCLT1_KAN619-5_5.tif:0004-0529	1.34	48.721	0	471	73.608	38.076	0.805	65.278	12570	1.303	0.768	0.913	0.309522	0.938017	1350	CEP170_KAN619-5_5.tif:0004-0529	1.34	157.407	0	642	73.608	38.076	0.805	210.899	40611	1.303	0.768	0.913
1341	SCLT1_KAN619-5_5.tif:0005-0533	0.566	14.982	0	93	56.236	38.433	0.971	8.48	1633	1.024	0.976	0.96	0.112815	0.12186	1351	CEP170_KAN619-5_5.tif:0005-0533	0.566	132.798	0	358	56.236	38.433	0.971	75.171	14475	1.024	0.976	0.96
1342	SCLT1_KAN619-5_5.tif:0006-0699	0.919	63.006	0	370	6.608	50.401	0.885	57.914	11152	1.166	0.858	0.957	0.524701	0.832201	1352	CEP170_KAN619-5_5.tif:0006-0699	0.919	120.079	0	413	6.608	50.401	0.885	110.375	21254	1.166	0.858	0.957
1343	SCLT1_KAN619-5_5.tif:0007-0754	0.779	39.88	0	166	33.943	54.329	0.854	31.065	5982	1.364	0.733	0.92	0.29779	0.446398	1353	CEP170_KAN619-5_5.tif:0007-0754	0.779	133.92	0	469	33.943	54.329	0.854	104.32	20088	1.364	0.733	0.92
1344	SCLT1_KAN619-5_5.tif:0008-0904	1.049	15.718	0	100	15.019	65.154	0.92	16.488	3175	1.234	0.81	0.927	0.101451	0.23693	1354	CEP170_KAN619-5_5.tif:0008-0904	1.049	154.931	0	549	15.019	65.154	0.92	162.525	31296	1.234	0.81	0.927
1345	SCLT1_KAN619-5_5.tif:0009-0910	0.701	45.074	0	291	71.542	65.582	0.919	31.6	6085	1.125	0.889	0.938	0.338978	0.454084	1355	CEP170_KAN619-5_5.tif:0009-0910	0.701	132.97	0	463	71.542	65.582	0.919	93.222	17951	1.125	0.889	0.938
1346	SCLT1_KAN619-5_5.tif:0010-1221	1.096	60.436	0	388	55.935	88.041	0.834	66.223	12752	1.121	0.892	0.927	0.554338	0.951599	1356	CEP170_KAN619-5_5.tif:0010-1221	1.096	109.024	0	538	55.935	88.041	0.834	119.463	23004	1.121	0.892	0.927
1357	SCLT1_KAN619-5_6.tif:0001-0035	0.649	96.024	0	396	1.127	2.548	0.86	62.333	12003	1.213	0.824	0.94	0.710069	0.895706	1365	CEP170_KAN619-5_6.tif:0001-0035	0.649	135.232	0	477	1.127	2.548	0.86	87.785	16904	1.213	0.824	0.94
1358	SCLT1_KAN619-5_6.tif:0002-0268	0.826	33.887	0	154	46.644	19.354	0.875	27.981	5388	1.453	0.688	0.935	0.274101	0.402071	1366	CEP170_KAN619-5_6.tif:0002-0268	0.826	123.629	0	363	46.644	19.354	0.875	102.082	19657	1.453	0.688	0.935
1359	SCLT1_KAN619-5_6.tif:0003-0336	0.711	56.204	0	253	62.918	24.253	0.821	39.987	7700	1.256	0.796	0.884	0.509495	0.574601	1367	CEP170_KAN619-5_6.tif:0003-0336	0.711	110.314	0	288	62.918	24.253	0.821	78.484	15113	1.256	0.796	0.884
1360	SCLT1_KAN619-5_6.tif:0004-0369	0.893	61.605	0	275	13.036	26.61	0.884	55.027	10596	1.62	0.617	0.932	0.450683	0.79071	1368	CEP170_KAN619-5_6.tif:0004-0369	0.893	136.692	0	473	13.036	26.61	0.884	122.096	23511	1.62	0.617	0.932
1361	SCLT1_KAN619-5_6.tif:0005-0514	0.556	79.29	0	233	69.521	37.049	0.859	44.059	8484	1.372	0.729	0.922	0.756419	0.633106	1369	CEP170_KAN619-5_6.tif:0005-0514	0.556	104.822	0	275	69.521	37.049	0.859	58.246	11216	1.372	0.729	0.922
1362	SCLT1_KAN619-5_6.tif:0006-0616	1.142	56.264	0	316	65.682	44.452	0.873	64.281	12378	1.451	0.689	0.928	0.464744	0.923689	1370	CEP170_KAN619-5_6.tif:0006-0616	1.142	121.064	0	468	65.682	44.452	0.873	138.314	26634	1.451	0.689	0.928
1363	SCLT1_KAN619-5_6.tif:0007-0682	0.654	50.69	0	208	22.579	49.176	0.932	33.169	6387	1.137	0.88	0.926	0.409082	0.47662	1371	CEP170_KAN619-5_6.tif:0007-0682	0.654	123.913	0	377	22.579	49.176	0.932	81.081	15613	1.137	0.88	0.926
1364	SCLT1_KAN619-5_6.tif:0008-0952	0.55	40.689	0	180	22.558	68.591	0.944	22.398	4313	1.25	0.8	0.955	0.344599	0.321851	1372	CEP170_KAN619-5_6.tif:0008-0952	0.55	118.075	0	338	22.558	68.591	0.944	64.997	12516	1.25	0.8	0.955
									AVERAGE	10313.8					0.769652
									SEM	713.491
										0.00871713
1373	SCLT1_KAN619-6_1.tif:0001-0151	0.857	57.921	0	309	83.672	10.896	0.886	49.631	9557	1.245	0.803	0.938	0.42502	0.713177	1384	CEP170_KAN619-6_1.tif:0001-0151	0.857	136.279	0	464	83.672	10.896	0.886	116.773	22486	1.245	0.803	0.938
1374	SCLT1_KAN619-6_1.tif:0002-0176	0.748	35.896	0	253	39.272	12.728	0.958	26.843	5169	1.188	0.842	0.932	0.292199	0.385729	1385	CEP170_KAN619-6_1.tif:0002-0176	0.748	122.847	0	332	39.272	12.728	0.958	91.867	17690	1.188	0.842	0.932
1375	SCLT1_KAN619-6_1.tif:0003-0177	1.08	58.322	0	364	43.668	12.735	0.745	62.998	12131	1.589	0.629	0.881	0.466792	0.905257	1386	CEP170_KAN619-6_1.tif:0003-0177	1.08	124.942	0	625	43.668	12.735	0.745	134.96	25988	1.589	0.629	0.881
1376	SCLT1_KAN619-6_1.tif:0004-0392	0.722	179.259	0	755	83.845	28.31	0.754	129.398	24917	1.755	0.57	0.894	25.8475	1.85939	1387	CEP170_KAN619-6_1.tif:0004-0392	0.722	6.935	0	36	83.845	28.31	0.754	5.006	964	1.755	0.57	0.894
1377	SCLT1_KAN619-6_1.tif:0005-0419	1.023	63.421	0	446	67.805	30.184	0.735	64.883	12494	1.665	0.6	0.845	0.754696	0.932346	1388	CEP170_KAN619-6_1.tif:0005-0419	1.023	84.036	0	318	67.805	30.184	0.735	85.973	16555	1.665	0.6	0.845
1378	SCLT1_KAN619-6_1.tif:0006-0427	0.592	46.553	0	249	32.917	30.792	0.889	27.56	5307	1.286	0.777	0.946	0.385095	0.396027	1389	CEP170_KAN619-6_1.tif:0006-0427	0.592	120.886	0	310	32.917	30.792	0.889	71.567	13781	1.286	0.777	0.946
1379	SCLT1_KAN619-6_1.tif:0007-0489	0.945	62.995	0	381	15.516	35.212	0.741	59.539	11465	1.938	0.516	0.91	0.825355	0.855558	1390	CEP170_KAN619-6_1.tif:0007-0489	0.945	76.324	0	280	15.516	35.212	0.741	72.138	13891	1.938	0.516	0.91
1380	SCLT1_KAN619-6_1.tif:0008-0588	0.525	179.861	0	570	75.803	42.406	0.857	94.339	18166	1.628	0.614	0.985	54.0655	1.35561	1391	CEP170_KAN619-6_1.tif:0008-0588	0.525	3.327	0	19	75.803	42.406	0.857	1.745	336	1.628	0.614	0.985
1381	SCLT1_KAN619-6_1.tif:0009-0940	1.246	67.646	0	436	36.408	67.75	0.808	84.311	16235	1.202	0.832	0.863	0.806548	1.21151	1392	CEP170_KAN619-6_1.tif:0009-0940	1.246	83.871	0	393	36.408	67.75	0.808	104.533	20129	1.202	0.832	0.863
1382	SCLT1_KAN619-6_1.tif:0010-1122	1.08	115.832	0	616	49.88	80.813	0.884	125.118	24093	1.335	0.749	0.95	1.30366	1.7979	1393	CEP170_KAN619-6_1.tif:0010-1122	1.08	88.851	0	324	49.88	80.813	0.884	95.975	18481	1.335	0.749	0.95
1383	SCLT1_KAN619-6_1.tif:0011-1175	0.608	23.41	0	129	7.553	84.714	0.886	14.224	2739	1.398	0.715	0.955	0.19001	0.204394	1394	CEP170_KAN619-6_1.tif:0011-1175	0.608	123.205	0	330	7.553	84.714	0.886	74.859	14415	1.398	0.715	0.955
1395	SCLT1_KAN619-6_2.tif:0001-0075	0.919	28.463	0	136	21.131	5.363	0.931	26.163	5038	1.17	0.855	0.934	0.207376	0.375953	1404	CEP170_KAN619-6_2.tif:0001-0075	0.919	137.254	0	407	21.131	5.363	0.931	126.162	24294	1.17	0.855	0.934
1396	SCLT1_KAN619-6_2.tif:0002-0259	1.309	67.115	0	474	38.464	18.65	0.758	87.832	16913	1.617	0.618	0.918	0.522425	1.26211	1405	CEP170_KAN619-6_2.tif:0002-0259	1.309	128.468	0	503	38.464	18.65	0.758	168.123	32374	1.617	0.618	0.918
1397	SCLT1_KAN619-6_2.tif:0003-0320	0.821	16.842	0	90	83.182	23.081	0.82	13.819	2661	1.486	0.673	0.911	0.139597	0.198573	1406	CEP170_KAN619-6_2.tif:0003-0320	0.821	120.646	0	365	83.182	23.081	0.82	98.992	19062	1.486	0.673	0.911
1398	SCLT1_KAN619-6_2.tif:0004-0500	0.836	27.13	0	226	7.147	36.039	0.931	22.684	4368	1.15	0.869	0.933	0.163076	0.325955	1407	CEP170_KAN619-6_2.tif:0004-0500	0.836	166.366	0	690	7.147	36.039	0.931	139.098	26785	1.15	0.869	0.933
1399	SCLT1_KAN619-6_2.tif:0005-0650	1.314	79.3	0	648	58.303	46.889	0.82	104.19	20063	1.282	0.78	0.912	0.757123	1.49717	1408	CEP170_KAN619-6_2.tif:0005-0650	1.314	104.739	0	431	58.303	46.889	0.82	137.613	26499	1.282	0.78	0.912
1400	SCLT1_KAN619-6_2.tif:0006-0802	0.815	105.885	0	586	11.221	57.829	0.927	86.331	16624	1.05	0.952	0.969	0.82025	1.24054	1409	CEP170_KAN619-6_2.tif:0006-0802	0.815	129.089	0	448	11.221	57.829	0.927	105.25	20267	1.05	0.952	0.969
1401	SCLT1_KAN619-6_2.tif:0007-1030	0.852	23.695	0	111	75.751	74.278	0.804	20.181	3886	1.515	0.66	0.906	0.175353	0.289987	1410	CEP170_KAN619-6_2.tif:0007-1030	0.852	135.128	0	482	75.751	74.278	0.804	115.085	22161	1.515	0.66	0.906
1402	SCLT1_KAN619-6_2.tif:0008-1101	1.387	65.139	0	590	48.524	79.374	0.789	90.319	17392	1.906	0.525	0.937	0.780295	1.29785	1411	CEP170_KAN619-6_2.tif:0008-1101	1.387	83.479	0	355	48.524	79.374	0.789	115.75	22289	1.906	0.525	0.937
1403	SCLT1_KAN619-6_2.tif:0009-1197	1.117	70.112	0	444	66.707	86.311	0.818	78.281	15074	1.422	0.703	0.903	0.808301	1.12487	1412	CEP170_KAN619-6_2.tif:0009-1197	1.117	86.74	0	424	66.707	86.311	0.818	96.847	18649	1.422	0.703	0.903
1413	SCLT1_KAN619-6_3.tif:0001-0183	1.049	58.356	0	318	24.943	13.182	0.869	61.217	11788	1.398	0.716	0.918	0.258923	0.879661	1424	CEP170_KAN619-6_3.tif:0001-0183	1.049	225.381	0	875	24.943	13.182	0.869	236.428	45527	1.398	0.716	0.918
1414	SCLT1_KAN619-6_3.tif:0002-0193	1.007	70.536	0	474	58.426	13.923	0.835	71.063	13684	1.34	0.746	0.907	0.535787	1.02115	1425	CEP170_KAN619-6_3.tif:0002-0193	1.007	131.649	0	496	58.426	13.923	0.835	132.633	25540	1.34	0.746	0.907
1415	SCLT1_KAN619-6_3.tif:0003-0370	0.878	81.562	0	471	33.78	26.669	0.868	71.582	13784	1.215	0.823	0.901	0.74016	1.02861	1426	CEP170_KAN619-6_3.tif:0003-0370	0.878	110.195	0	281	33.78	26.669	0.868	96.712	18623	1.215	0.823	0.901
1416	SCLT1_KAN619-6_3.tif:0004-0382	1.148	105.57	0	625	79.895	27.59	0.884	121.161	23331	1.261	0.793	0.925	0.917135	1.74104	1427	CEP170_KAN619-6_3.tif:0004-0382	1.148	115.109	0	388	79.895	27.59	0.884	132.108	25439	1.261	0.793	0.925
1417	SCLT1_KAN619-6_3.tif:0005-0563	0.888	71.515	0	379	64.93	40.569	0.819	63.507	12229	1.498	0.668	0.912	0.743178	0.91257	1428	CEP170_KAN619-6_3.tif:0005-0563	0.888	96.228	0	331	64.93	40.569	0.819	85.453	16455	1.498	0.668	0.912
1418	SCLT1_KAN619-6_3.tif:0006-0609	0.805	105.161	0	506	6.366	43.908	0.767	84.648	16300	1.434	0.697	0.861	1.18125	1.21636	1429	CEP170_KAN619-6_3.tif:0006-0609	0.805	89.026	0	213	6.366	43.908	0.767	71.66	13799	1.434	0.697	0.861
1419	SCLT1_KAN619-6_3.tif:0007-0644	0.919	75.729	0	390	40.96	46.361	0.829	69.609	13404	1.477	0.677	0.924	0.581973	1.00025	1430	CEP170_KAN619-6_3.tif:0007-0644	0.919	130.124	0	484	40.96	46.361	0.829	119.609	23032	1.477	0.677	0.924
1420	SCLT1_KAN619-6_3.tif:0008-0696	0.966	83.527	0	512	0.836	50.185	0.852	80.681	15536	1.262	0.792	0.919	0.811237	1.15935	1431	CEP170_KAN619-6_3.tif:0008-0696	0.966	102.962	0	430	0.836	50.185	0.852	99.454	19151	1.262	0.792	0.919
1421	SCLT1_KAN619-6_3.tif:0009-0945	0.582	55.286	0	216	48.274	68.145	0.985	32.156	6192	1.097	0.912	0.941	0.499597	0.462069	1432	CEP170_KAN619-6_3.tif:0009-0945	0.582	110.661	0	216	48.274	68.145	0.985	64.364	12394	1.097	0.912	0.941
1422	SCLT1_KAN619-6_3.tif:0010-1131	0.904	66.615	0	364	68.438	81.578	0.853	60.194	11591	1.113	0.898	0.902	0.590504	0.864961	1433	CEP170_KAN619-6_3.tif:0010-1131	0.904	112.81	0	305	68.438	81.578	0.853	101.936	19629	1.113	0.898	0.902
1423	SCLT1_KAN619-6_3.tif:0011-1153	0.795	145.386	0	432	0.545	83.109	0.842	115.516	22244	1.777	0.563	0.953	1.10037	1.65992	1434	CEP170_KAN619-6_3.tif:0011-1153	0.795	132.124	0	391	0.545	83.109	0.842	104.979	20215	1.777	0.563	0.953
1435	SCLT1_KAN619-6_4.tif:0001-0044	0.54	87.077	0	411	9.284	3.187	0.956	47.029	9056	1.147	0.872	0.937	0.947677	0.67579	1445	CEP170_KAN619-6_4.tif:0001-0044	0.54	91.885	0	192	9.284	3.187	0.956	49.626	9556	1.147	0.872	0.937
1436	SCLT1_KAN619-6_4.tif:0002-0131	1.049	29.871	0	218	34.777	9.439	0.769	31.335	6034	1.95	0.513	0.92	0.222026	0.450278	1446	CEP170_KAN619-6_4.tif:0002-0131	1.049	134.54	0	385	34.777	9.439	0.769	141.134	27177	1.95	0.513	0.92
1437	SCLT1_KAN619-6_4.tif:0003-0142	0.893	64.535	0	327	89.025	10.252	0.936	57.644	11100	1.152	0.868	0.937	0.459837	0.828321	1447	CEP170_KAN619-6_4.tif:0003-0142	0.893	140.343	0	394	89.025	10.252	0.936	125.357	24139	1.152	0.868	0.937
1438	SCLT1_KAN619-6_4.tif:0004-0512	0.769	73.574	0	408	45.957	36.892	0.887	56.548	10889	1.446	0.692	0.937	0.568557	0.812575	1448	CEP170_KAN619-6_4.tif:0004-0512	0.769	129.405	0	368	45.957	36.892	0.887	99.459	19152	1.446	0.692	0.937
1439	SCLT1_KAN619-6_4.tif:0005-0672	0.961	69.903	0	496	7.665	48.403	0.814	67.158	12932	1.233	0.811	0.883	0.502038	0.965031	1449	CEP170_KAN619-6_4.tif:0005-0672	0.961	139.238	0	485	7.665	48.403	0.814	133.77	25759	1.233	0.811	0.883
1440	SCLT1_KAN619-6_4.tif:0006-0747	0.852	64.47	0	344	24.531	53.809	0.793	54.907	10573	1.438	0.695	0.901	0.788089	0.788994	1450	CEP170_KAN619-6_4.tif:0006-0747	0.852	81.805	0	302	24.531	53.809	0.793	69.671	13416	1.438	0.695	0.901
1441	SCLT1_KAN619-6_4.tif:0007-0763	1.101	67.759	0	402	51.665	55.019	0.807	74.6	14365	1.683	0.594	0.914	0.460417	1.07197	1451	CEP170_KAN619-6_4.tif:0007-0763	1.101	147.17	0	590	51.665	55.019	0.807	162.026	31200	1.683	0.594	0.914
1442	SCLT1_KAN619-6_4.tif:0008-0887	0.826	66.887	0	339	72.61	63.937	0.833	55.229	10635	1.37	0.73	0.927	0.825506	0.793621	1452	CEP170_KAN619-6_4.tif:0008-0887	0.826	81.025	0	299	72.61	63.937	0.833	66.903	12883	1.37	0.73	0.927
1443	SCLT1_KAN619-6_4.tif:0009-1127	0.878	52.426	0	250	8.525	81.248	0.898	46.011	8860	1.119	0.894	0.923	0.440052	0.661164	1453	CEP170_KAN619-6_4.tif:0009-1127	0.878	119.136	0	338	8.525	81.248	0.898	104.559	20134	1.119	0.894	0.923
1444	SCLT1_KAN619-6_4.tif:0010-1216	0.815	24.879	0	144	89.722	87.618	0.843	20.284	3906	1.425	0.702	0.924	0.156842	0.291479	1454	CEP170_KAN619-6_4.tif:0010-1216	0.815	158.624	0	629	89.722	87.618	0.843	129.33	24904	1.425	0.702	0.924
1455	SCLT1_KAN619-6_5.tif:0001-0130	1.241	67.795	0	625	33.966	9.379	0.833	84.145	16203	1.256	0.796	0.909	0.488513	1.20912	1464	CEP170_KAN619-6_5.tif:0001-0130	1.241	138.778	0	589	33.966	9.379	0.833	172.246	33168	1.256	0.796	0.909
1456	SCLT1_KAN619-6_5.tif:0002-0135	1.168	52.618	0	403	67.012	9.687	0.677	61.482	11839	1.837	0.544	0.851	0.595553	0.883467	1465	CEP170_KAN619-6_5.tif:0002-0135	1.168	88.351	0	261	67.012	9.687	0.677	103.235	19879	1.837	0.544	0.851
1457	SCLT1_KAN619-6_5.tif:0003-0175	0.67	7.953	0	60	54.611	12.634	0.868	5.328	1026	1.616	0.619	0.918	0.0718035	0.0765637	1466	CEP170_KAN619-6_5.tif:0003-0175	0.67	110.767	0	232	54.611	12.634	0.868	74.205	14289	1.616	0.619	0.918
1458	SCLT1_KAN619-6_5.tif:0004-0478	0.675	10.608	0	61	83.279	34.497	0.92	7.161	1379	1.193	0.838	0.963	0.0786786	0.102906	1467	CEP170_KAN619-6_5.tif:0004-0478	0.675	134.823	0	473	83.279	34.497	0.92	91.02	17527	1.193	0.838	0.963
1459	SCLT1_KAN619-6_5.tif:0005-0727	0.904	17.58	0	113	6.688	52.426	0.882	15.886	3059	1.214	0.824	0.941	0.11706	0.228273	1468	CEP170_KAN619-6_5.tif:0005-0727	0.904	150.184	0	609	6.688	52.426	0.882	135.707	26132	1.214	0.824	0.941
1460	SCLT1_KAN619-6_5.tif:0006-0788	1.049	65.238	0	348	50.258	56.818	0.869	68.435	13178	1.158	0.864	0.916	0.566771	0.983388	1469	CEP170_KAN619-6_5.tif:0006-0788	1.049	115.104	0	391	50.258	56.818	0.869	120.746	23251	1.158	0.864	0.916
1461	SCLT1_KAN619-6_5.tif:0007-0801	0.571	33.427	0	115	26.585	57.767	0.922	19.095	3677	1.048	0.954	0.969	0.253779	0.274391	1470	CEP170_KAN619-6_5.tif:0007-0801	0.571	131.718	0	396	26.585	57.767	0.922	75.244	14489	1.048	0.954	0.969
1462	SCLT1_KAN619-6_5.tif:0008-0922	1.132	56.936	0	387	3.229	66.431	0.781	64.457	12412	1.377	0.726	0.886	0.653435	0.926227	1471	CEP170_KAN619-6_5.tif:0008-0922	1.132	87.133	0	444	3.229	66.431	0.781	98.644	18995	1.377	0.726	0.886
1463	SCLT1_KAN619-6_5.tif:0009-1066	0.821	53.709	0	221	49.591	76.848	0.947	44.069	8486	1.141	0.876	0.952	0.426197	0.633255	1472	CEP170_KAN619-6_5.tif:0009-1066	0.821	126.019	0	351	49.591	76.848	0.947	103.401	19911	1.141	0.876	0.952
1473	SCLT1_KAN619-6_6.tif:0001-0208	1.397	62.394	0	461	26.457	15.097	0.73	87.162	16784	1.277	0.783	0.855	0.531661	1.25248	1483	CEP170_KAN619-6_6.tif:0001-0208	1.397	117.357	0	679	26.457	15.097	0.73	163.942	31569	1.277	0.783	0.855
1474	SCLT1_KAN619-6_6.tif:0002-0207	0.519	29	0	170	90.57	14.96	0.919	15.06	2900	1.294	0.773	0.935	0.256003	0.216408	1484	CEP170_KAN619-6_6.tif:0002-0207	0.519	113.28	0	250	90.57	14.96	0.919	58.828	11328	1.294	0.773	0.935
1475	SCLT1_KAN619-6_6.tif:0003-0322	0.743	44.608	0	240	71.573	23.171	0.768	33.127	6379	1.277	0.783	0.883	0.371304	0.476023	1485	CEP170_KAN619-6_6.tif:0003-0322	0.743	120.14	0	429	71.573	23.171	0.768	89.218	17180	1.277	0.783	0.883
1476	SCLT1_KAN619-6_6.tif:0004-0444	0.706	50.235	0	336	42.822	31.991	0.794	35.48	6832	1.308	0.764	0.877	0.40737	0.509828	1486	CEP170_KAN619-6_6.tif:0004-0444	0.706	123.316	0	450	42.822	31.991	0.794	87.094	16771	1.308	0.764	0.877
1477	SCLT1_KAN619-6_6.tif:0005-0755	0.53	8.608	0	44	68.424	54.403	0.95	4.56	878	1.108	0.903	0.967	0.0670895	0.0655194	1487	CEP170_KAN619-6_6.tif:0005-0755	0.53	128.304	0	355	68.424	54.403	0.95	67.963	13087	1.108	0.903	0.967
1478	SCLT1_KAN619-6_6.tif:0006-0772	0.904	41.58	0	241	37.072	55.563	0.853	37.572	7235	1.326	0.754	0.928	0.33623	0.539901	1488	CEP170_KAN619-6_6.tif:0006-0772	0.904	123.667	0	350	37.072	55.563	0.853	111.746	21518	1.326	0.754	0.928
1479	SCLT1_KAN619-6_6.tif:0007-0811	0.701	15.526	0	100	7.543	58.423	0.861	10.885	2096	1.331	0.752	0.912	0.128834	0.156411	1489	CEP170_KAN619-6_6.tif:0007-0811	0.701	120.511	0	292	7.543	58.423	0.861	84.487	16269	1.331	0.752	0.912
1480	SCLT1_KAN619-6_6.tif:0008-0889	0.862	18.145	0	90	80.557	64.078	0.833	15.642	3012	1.397	0.716	0.902	0.130695	0.224766	1490	CEP170_KAN619-6_6.tif:0008-0889	0.862	138.831	0	447	80.557	64.078	0.833	119.681	23046	1.397	0.716	0.902
1481	SCLT1_KAN619-6_6.tif:0009-0899	0.592	169.482	0	475	45.109	64.815	0.839	100.337	19321	1.689	0.592	0.954	25.4224	1.4418	1491	CEP170_KAN619-6_6.tif:0009-0899	0.592	6.667	0	27	45.109	64.815	0.839	3.947	760	1.689	0.592	0.954
1482	SCLT1_KAN619-6_6.tif:0010-1026	1.158	47.09	0	407	47.835	73.955	0.722	54.533	10501	1.51	0.662	0.831	0.574704	0.783621	1492	CEP170_KAN619-6_6.tif:0010-1026	1.158	81.937	0	379	47.835	73.955	0.722	94.889	18272	1.51	0.662	0.831
1493	SCLT1_KAN619-6_7.tif:0001-0083	0.571	13.073	0	51	48.371	6.014	0.967	7.468	1438	1.313	0.761	0.94	0.111188	0.107309	1503	CEP170_KAN619-6_7.tif:0001-0083	0.571	117.573	0	300	48.371	6.014	0.967	67.163	12933	1.313	0.761	0.94
1494	SCLT1_KAN619-6_7.tif:0002-0107	0.862	39.181	0	161	2.732	7.679	0.959	33.776	6504	1.138	0.879	0.957	0.27557	0.485351	1504	CEP170_KAN619-6_7.tif:0002-0107	0.862	142.181	0	507	2.732	7.679	0.959	122.569	23602	1.138	0.879	0.957
1495	SCLT1_KAN619-6_7.tif:0003-0145	1.065	20.293	0	134	62.31	10.48	0.765	21.603	4160	1.376	0.727	0.874	0.155677	0.310434	1505	CEP170_KAN619-6_7.tif:0003-0145	1.065	130.351	0	480	62.31	10.48	0.765	138.771	26722	1.376	0.727	0.874
1496	SCLT1_KAN619-6_7.tif:0004-0178	1.148	46.462	0	439	36.269	12.828	0.741	53.323	10268	1.882	0.531	0.902	0.394726	0.766234	1506	CEP170_KAN619-6_7.tif:0004-0178	1.148	117.706	0	439	36.269	12.828	0.741	135.089	26013	1.882	0.531	0.902
1497	SCLT1_KAN619-6_7.tif:0005-0347	1.091	58.571	0	458	38.218	25.064	0.848	63.876	12300	1.251	0.799	0.94	0.48045	0.917869	1507	CEP170_KAN619-6_7.tif:0005-0347	1.091	121.91	0	398	38.218	25.064	0.848	132.95	25601	1.251	0.799	0.94
1498	SCLT1_KAN619-6_7.tif:0006-0606	0.966	47.769	0	237	51.154	43.669	0.729	46.141	8885	1.304	0.767	0.834	0.500676	0.66303	1508	CEP170_KAN619-6_7.tif:0006-0606	0.966	95.409	0	280	51.154	43.669	0.729	92.158	17746	1.304	0.767	0.834
1499	SCLT1_KAN619-6_7.tif:0007-0808	0.753	12.841	0	113	24.487	58.26	0.856	9.67	1862	1.186	0.843	0.932	0.105038	0.138949	1509	CEP170_KAN619-6_7.tif:0007-0808	0.753	122.255	0	350	24.487	58.26	0.856	92.059	17727	1.186	0.843	0.932
1500	SCLT1_KAN619-6_7.tif:0008-0864	0.789	6.947	0	75	43.351	62.334	0.888	5.484	1056	1.333	0.75	0.935	0.0585333	0.0788024	1510	CEP170_KAN619-6_7.tif:0008-0864	0.789	118.691	0	316	43.351	62.334	0.888	93.69	18041	1.333	0.75	0.935
1501	SCLT1_KAN619-6_7.tif:0009-1061	0.831	59.987	0	320	0.749	76.507	0.701	49.844	9598	1.377	0.726	0.856	0.639483	0.716236	1511	CEP170_KAN619-6_7.tif:0009-1061	0.831	93.806	0	306	0.749	76.507	0.701	77.944	15009	1.377	0.726	0.856
1502	SCLT1_KAN619-6_7.tif:0010-1140	0.68	47.092	0	232	74.041	82.199	0.814	32.037	6169	1.031	0.97	0.888	0.373562	0.460352	1512	CEP170_KAN619-6_7.tif:0010-1140	0.68	126.061	0	363	74.041	82.199	0.814	85.76	16514	1.031	0.97	0.888
1513	SCLT1_KAN619-6_8.tif:0001-0217	0.888	59.889	0	405	63.87	15.664	0.749	53.183	10241	1.998	0.5	0.907	0.96259	0.764219	1521	CEP170_KAN619-6_8.tif:0001-0217	0.888	62.216	0	240	63.87	15.664	0.749	55.25	10639	1.998	0.5	0.907
1514	SCLT1_KAN619-6_8.tif:0002-0301	0.618	18.664	0	102	9.91	21.689	0.956	11.534	2221	1.105	0.905	0.96	0.152019	0.165739	1522	CEP170_KAN619-6_8.tif:0002-0301	0.618	122.773	0	334	9.91	21.689	0.956	75.872	14610	1.105	0.905	0.96
1515	SCLT1_KAN619-6_8.tif:0003-0460	0.696	25.045	0	194	35.441	33.145	0.888	17.428	3356	1.136	0.88	0.934	0.203963	0.250436	1523	CEP170_KAN619-6_8.tif:0003-0460	0.696	122.791	0	381	35.441	33.145	0.888	85.448	16454	1.136	0.88	0.934
1516	SCLT1_KAN619-6_8.tif:0004-0739	0.654	32.857	0	131	86.346	53.282	0.835	21.5	4140	1.243	0.805	0.916	0.2747	0.308941	1524	CEP170_KAN619-6_8.tif:0004-0739	0.654	119.611	0	367	86.346	53.282	0.835	78.266	15071	1.243	0.805	0.916
1517	SCLT1_KAN619-6_8.tif:0005-0848	1.091	60.295	0	444	47.198	61.19	0.799	65.756	12662	1.382	0.724	0.894	0.584418	0.944882	1525	CEP170_KAN619-6_8.tif:0005-0848	1.091	103.171	0	388	47.198	61.19	0.799	112.515	21666	1.382	0.724	0.894
1518	SCLT1_KAN619-6_8.tif:0006-0912	0.81	77.173	0	404	27.082	65.726	0.902	62.52	12039	1.082	0.924	0.92	0.727564	0.898392	1526	CEP170_KAN619-6_8.tif:0006-0912	0.81	106.071	0	332	27.082	65.726	0.902	85.931	16547	1.082	0.924	0.92
1519	SCLT1_KAN619-6_8.tif:0007-0991	0.758	51.014	0	310	54.823	71.527	0.69	38.679	7448	1.463	0.683	0.832	0.605184	0.555796	1527	CEP170_KAN619-6_8.tif:0007-0991	0.758	84.295	0	342	54.823	71.527	0.69	63.912	12307	1.463	0.683	0.832
1520	SCLT1_KAN619-6_8.tif:0008-1098	0.872	71.863	0	350	49.346	79.144	0.872	62.697	12073	1.122	0.891	0.913	0.597762	0.900929	1528	CEP170_KAN619-6_8.tif:0008-1098	0.872	120.22	0	357	49.346	79.144	0.872	104.886	20197	1.122	0.891	0.913
									AVERAGE	9953.1					0.742735
									SEM	678.76
										0.0014059
1529	SCLT1_KAN619-7_1.tif:0001-0048	0.961	74.622	0	496	39.687	3.488	0.839	71.691	13805	1.277	0.783	0.92	0.740691	1.03018	1541	CEP170_KAN619-7_1.tif:0001-0048	0.961	100.746	0	393	39.687	3.488	0.839	96.79	18638	1.277	0.783	0.92
1530	SCLT1_KAN619-7_1.tif:0002-0194	0.696	42.224	0	109	4.584	13.999	0.888	29.383	5658	1.404	0.712	0.954	0.33765	0.42222	1542	CEP170_KAN619-7_1.tif:0002-0194	0.696	125.052	0	353	4.584	13.999	0.888	87.022	16757	1.404	0.712	0.954
1531	SCLT1_KAN619-7_1.tif:0003-0380	0.763	47.925	0	237	24.7	27.456	0.77	36.586	7045	1.334	0.75	0.894	0.426866	0.525722	1543	CEP170_KAN619-7_1.tif:0003-0380	0.763	112.272	0	275	24.7	27.456	0.77	85.708	16504	1.334	0.75	0.894
1532	SCLT1_KAN619-7_1.tif:0004-0429	0.852	31.36	0	194	76.419	30.939	0.893	26.708	5143	1.4	0.714	0.924	0.257898	0.383789	1544	CEP170_KAN619-7_1.tif:0004-0429	0.852	121.598	0	337	76.419	30.939	0.893	103.562	19942	1.4	0.714	0.924
1533	SCLT1_KAN619-7_1.tif:0005-0534	1.174	85.146	0	628	56.738	38.498	0.853	99.932	19243	1.299	0.77	0.908	0.741541	1.43598	1545	CEP170_KAN619-7_1.tif:0005-0534	1.174	114.823	0	502	56.738	38.498	0.853	134.762	25950	1.299	0.77	0.908
1534	SCLT1_KAN619-7_1.tif:0006-0581	0.758	12.11	0	76	12.806	41.903	0.921	9.181	1768	1.154	0.867	0.927	0.0727303	0.131934	1546	CEP170_KAN619-7_1.tif:0006-0581	0.758	166.5	0	664	12.806	41.903	0.921	126.24	24309	1.154	0.867	0.927
1535	SCLT1_KAN619-7_1.tif:0007-0654	1.059	81.441	0	413	71.016	47.065	0.74	86.279	16614	1.659	0.603	0.883	0.818706	1.23979	1547	CEP170_KAN619-7_1.tif:0007-0654	1.059	99.475	0	403	71.016	47.065	0.74	105.385	20293	1.659	0.603	0.883
1536	SCLT1_KAN619-7_1.tif:0008-0661	0.93	84.358	0	474	36.417	47.649	0.77	78.417	15100	1.516	0.66	0.867	0.903867	1.12681	1548	CEP170_KAN619-7_1.tif:0008-0661	0.93	93.33	0	245	36.417	47.649	0.77	86.757	16706	1.516	0.66	0.867
1537	SCLT1_KAN619-7_1.tif:0009-0865	0.691	77.594	0	377	22.661	62.362	0.805	53.593	10320	1.374	0.728	0.89	0.693642	0.770114	1549	CEP170_KAN619-7_1.tif:0009-0865	0.691	111.865	0	307	22.661	62.362	0.805	77.264	14878	1.374	0.728	0.89
1538	SCLT1_KAN619-7_1.tif:0010-0884	0.919	38.876	0	156	36.807	63.765	0.84	35.734	6881	1.267	0.789	0.917	0.292809	0.513484	1550	CEP170_KAN619-7_1.tif:0010-0884	0.919	132.768	0	429	36.807	63.765	0.84	122.039	23500	1.267	0.789	0.917
1539	SCLT1_KAN619-7_1.tif:0011-1185	0.857	101.788	0	543	73.294	85.419	0.877	87.219	16795	1.193	0.838	0.912	0.94211	1.2533	1551	CEP170_KAN619-7_1.tif:0011-1185	0.857	108.042	0	371	73.294	85.419	0.877	92.578	17827	1.193	0.838	0.912
1540	SCLT1_KAN619-7_1.tif:0012-1201	0.784	52.51	0	283	62.908	86.555	0.791	41.176	7929	1.118	0.895	0.888	0.49368	0.59169	1552	CEP170_KAN619-7_1.tif:0012-1201	0.784	106.364	0	405	62.908	86.555	0.791	83.407	16061	1.118	0.895	0.888
1553	SCLT1_KAN619-7_2.tif:0001-0122	1.2	107.173	0	578	33.044	8.731	0.796	128.567	24757	1.319	0.758	0.922	0.868819	1.84745	1563	CEP170_KAN619-7_2.tif:0001-0122	1.2	123.355	0	555	33.044	8.731	0.796	147.979	28495	1.319	0.758	0.922
1554	SCLT1_KAN619-7_2.tif:0002-0394	0.675	71.431	0	220	21.436	28.431	0.946	48.224	9286	1.17	0.855	0.963	0.506077	0.692954	1564	CEP170_KAN619-7_2.tif:0002-0394	0.675	141.146	0	448	21.436	28.431	0.946	95.289	18349	1.17	0.855	0.963
1555	SCLT1_KAN619-7_2.tif:0003-0587	1.018	59.184	0	331	75.821	42.304	0.87	60.241	11600	1.206	0.829	0.92	0.440178	0.865632	1565	CEP170_KAN619-7_2.tif:0003-0587	1.018	134.454	0	448	75.821	42.304	0.87	136.855	26353	1.206	0.829	0.92
1556	SCLT1_KAN619-7_2.tif:0004-0614	0.976	88.888	0	441	51.364	44.301	0.889	86.783	16711	1.416	0.706	0.967	0.645586	1.24703	1566	CEP170_KAN619-7_2.tif:0004-0614	0.976	137.686	0	532	51.364	44.301	0.889	134.425	25885	1.416	0.706	0.967
1557	SCLT1_KAN619-7_2.tif:0005-0697	0.831	79.419	0	406	57.89	50.208	0.859	65.989	12707	1.374	0.728	0.933	0.71921	0.94824	1567	CEP170_KAN619-7_2.tif:0005-0697	0.831	110.425	0	329	57.89	50.208	0.859	91.753	17668	1.374	0.728	0.933
1558	SCLT1_KAN619-7_2.tif:0006-0841	0.846	64.362	0	341	24.735	60.628	0.866	54.481	10491	1.209	0.827	0.911	0.577539	0.782875	1568	CEP170_KAN619-7_2.tif:0006-0841	0.846	111.442	0	341	24.735	60.628	0.866	94.334	18165	1.209	0.827	0.911
1559	SCLT1_KAN619-7_2.tif:0007-0882	1.117	75.233	0	579	80.14	63.54	0.764	83.999	16175	2.039	0.49	0.901	0.565362	1.20703	1569	CEP170_KAN619-7_2.tif:0007-0882	1.117	133.07	0	496	80.14	63.54	0.764	148.576	28610	2.039	0.49	0.901
1560	SCLT1_KAN619-7_2.tif:0008-0979	0.898	56.416	0	334	12.619	70.517	0.729	50.685	9760	1.342	0.745	0.854	0.543642	0.728325	1570	CEP170_KAN619-7_2.tif:0008-0979	0.898	103.775	0	283	12.619	70.517	0.729	93.233	17953	1.342	0.745	0.854
1561	SCLT1_KAN619-7_2.tif:0009-1229	1.007	49.954	0	226	90.871	88.534	0.942	50.327	9691	1.131	0.884	0.949	0.290593	0.723176	1571	CEP170_KAN619-7_2.tif:0009-1229	1.007	171.902	0	644	90.871	88.534	0.942	173.186	33349	1.131	0.884	0.949
1562	SCLT1_KAN619-7_2.tif:0010-1241	0.8	42.519	0	121	22.308	89.444	0.868	34.005	6548	1.407	0.711	0.919	0.312137	0.488634	1572	CEP170_KAN619-7_2.tif:0010-1241	0.8	136.221	0	568	22.308	89.444	0.868	108.942	20978	1.407	0.711	0.919
1573	SCLT1_KAN619-7_3.tif:0001-0010	0.576	61.09	0	228	20.553	0.734	0.891	35.215	6781	1.152	0.868	0.929	0.497287	0.506022	1582	CEP170_KAN619-7_3.tif:0001-0010	0.576	122.847	0	290	20.553	0.734	0.891	70.814	13636	1.152	0.868	0.929
1574	SCLT1_KAN619-7_3.tif:0002-0018	0.924	86.511	0	381	64.826	1.309	0.773	79.969	15399	1.506	0.664	0.875	0.989589	1.14913	1583	CEP170_KAN619-7_3.tif:0002-0018	0.924	87.421	0	353	64.826	1.309	0.773	80.811	15561	1.506	0.664	0.875
1575	SCLT1_KAN619-7_3.tif:0003-0032	1.096	97.938	0	556	40.307	2.311	0.889	107.316	20665	1.259	0.794	0.94	0.851252	1.54209	1584	CEP170_KAN619-7_3.tif:0003-0032	1.096	115.052	0	357	40.307	2.311	0.889	126.069	24276	1.259	0.794	0.94
1576	SCLT1_KAN619-7_3.tif:0004-0434	0.582	110.268	0	303	19.917	31.324	0.815	64.135	12350	1.649	0.606	0.907	1.30868	0.9216	1585	CEP170_KAN619-7_3.tif:0004-0434	0.582	84.259	0	282	19.917	31.324	0.815	49.008	9437	1.649	0.606	0.907
1577	SCLT1_KAN619-7_3.tif:0005-0528	1.007	73.835	0	478	66.411	38.089	0.817	74.387	14324	1.499	0.667	0.902	0.728142	1.06891	1586	CEP170_KAN619-7_3.tif:0005-0528	1.007	101.402	0	343	66.411	38.089	0.817	102.16	19672	1.499	0.667	0.902
1578	SCLT1_KAN619-7_3.tif:0006-0847	1.293	89.779	0	447	61.394	61.03	0.885	116.093	22355	1.433	0.698	0.938	0.779001	1.66821	1587	CEP170_KAN619-7_3.tif:0006-0847	1.293	115.249	0	537	61.394	61.03	0.885	149.028	28697	1.433	0.698	0.938
1579	SCLT1_KAN619-7_3.tif:0007-0858	0.696	93.821	0	502	54.094	61.855	0.888	65.288	12572	1.076	0.93	0.94	0.817691	0.938166	1588	CEP170_KAN619-7_3.tif:0007-0858	0.696	114.739	0	319	54.094	61.855	0.888	79.845	15375	1.076	0.93	0.94
1580	SCLT1_KAN619-7_3.tif:0008-1122	0.956	83.592	0	594	35.283	80.869	0.775	79.876	15381	1.691	0.591	0.88	0.95203	1.14778	1589	CEP170_KAN619-7_3.tif:0008-1122	0.956	87.804	0	406	35.283	80.869	0.775	83.9	16156	1.691	0.591	0.88
1581	SCLT1_KAN619-7_3.tif:0009-1217	0.821	47.38	0	244	15.401	87.679	0.891	38.876	7486	1.187	0.843	0.913	0.427137	0.558631	1590	CEP170_KAN619-7_3.tif:0009-1217	0.821	110.924	0	265	15.401	87.679	0.891	91.015	17526	1.187	0.843	0.913
1591	SCLT1_KAN619-7_4.tif:0001-0247	1.08	66.486	0	442	42.505	17.808	0.857	71.816	13829	1.249	0.8	0.933	0.398347	1.03197	1600	CEP170_KAN619-7_4.tif:0001-0247	1.08	166.904	0	675	42.505	17.808	0.857	180.285	34716	1.249	0.8	0.933
1592	SCLT1_KAN619-7_4.tif:0002-0537	0.95	54.552	0	321	31.592	38.79	0.709	51.843	9983	1.202	0.832	0.851	0.663322	0.744966	1601	CEP170_KAN619-7_4.tif:0002-0537	0.95	82.24	0	264	31.592	38.79	0.709	78.157	15050	1.202	0.832	0.851
1593	SCLT1_KAN619-7_4.tif:0003-0630	1.137	84.863	0	519	84.758	45.394	0.807	96.515	18585	1.776	0.563	0.952	0.712014	1.38688	1602	CEP170_KAN619-7_4.tif:0003-0630	1.137	119.187	0	487	84.758	45.394	0.807	135.552	26102	1.776	0.563	0.952
1594	SCLT1_KAN619-7_4.tif:0004-0661	0.909	72.166	0	410	49.055	47.645	0.831	65.584	12629	1.484	0.674	0.882	0.676868	0.94242	1603	CEP170_KAN619-7_4.tif:0004-0661	0.909	106.617	0	371	49.055	47.645	0.831	96.894	18658	1.484	0.674	0.882
1595	SCLT1_KAN619-7_4.tif:0005-0735	1.371	73.89	0	548	78.146	52.955	0.717	101.303	19507	1.988	0.503	0.892	0.678174	1.45568	1604	CEP170_KAN619-7_4.tif:0005-0735	1.371	108.955	0	411	78.146	52.955	0.717	149.376	28764	1.988	0.503	0.892
1596	SCLT1_KAN619-7_4.tif:0006-0918	0.582	25.786	0	107	7.24	66.181	0.938	14.998	2888	1.059	0.944	0.966	0.183225	0.215513	1605	CEP170_KAN619-7_4.tif:0006-0918	0.582	140.732	0	457	7.24	66.181	0.938	81.854	15762	1.059	0.944	0.966
1597	SCLT1_KAN619-7_4.tif:0007-0991	1.007	48.196	0	327	35.865	71.405	0.8	48.556	9350	1.436	0.696	0.907	0.441684	0.697729	1606	CEP170_KAN619-7_4.tif:0007-0991	1.007	109.119	0	423	35.865	71.405	0.8	109.934	21169	1.436	0.696	0.907
1598	SCLT1_KAN619-7_4.tif:0008-1030	0.525	22.733	0	102	72.103	74.271	0.959	11.923	2296	1.272	0.786	0.935	0.202666	0.171335	1607	CEP170_KAN619-7_4.tif:0008-1030	0.525	112.168	0	286	72.103	74.271	0.959	58.833	11329	1.272	0.786	0.935
1599	SCLT1_KAN619-7_4.tif:0009-1185	1.002	59.751	0	454	45.891	85.408	0.868	59.887	11532	1.598	0.626	0.915	0.494575	0.860558	1608	CEP170_KAN619-7_4.tif:0009-1185	1.002	120.813	0	363	45.891	85.408	0.868	121.089	23317	1.598	0.626	0.915
1609	SCLT1_KAN619-7_5.tif:0001-0239	1.283	60.045	0	711	42.582	17.181	0.682	77.02	14831	2.066	0.484	0.856	0.668003	1.10674	1619	CEP170_KAN619-7_5.tif:0001-0239	1.283	89.887	0	512	42.582	17.181	0.682	115.298	22202	2.066	0.484	0.856
1610	SCLT1_KAN619-7_5.tif:0002-0346	0.919	69.051	0	470	5.728	24.913	0.73	63.471	12222	1.61	0.621	0.87	0.647283	0.912048	1620	CEP170_KAN619-7_5.tif:0002-0346	0.919	106.678	0	222	5.728	24.913	0.73	98.057	18882	1.61	0.621	0.87
1611	SCLT1_KAN619-7_5.tif:0003-0398	0.654	30.151	0	125	81.946	28.625	0.881	19.729	3799	1.295	0.772	0.94	0.25483	0.283495	1621	CEP170_KAN619-7_5.tif:0003-0398	0.654	118.317	0	319	81.946	28.625	0.881	77.419	14908	1.295	0.772	0.94
1612	SCLT1_KAN619-7_5.tif:0004-0399	1.127	62.516	0	315	75.475	28.716	0.809	70.45	13566	1.756	0.569	0.927	0.577793	1.01234	1622	CEP170_KAN619-7_5.tif:0004-0399	1.127	108.198	0	474	75.475	28.716	0.809	121.93	23479	1.756	0.569	0.927
1613	SCLT1_KAN619-7_5.tif:0005-0463	0.893	12.052	0	56	38.366	33.376	0.884	10.765	2073	1.253	0.798	0.901	0.0856081	0.154694	1623	CEP170_KAN619-7_5.tif:0005-0463	0.893	140.785	0	396	38.366	33.376	0.884	125.752	24215	1.253	0.798	0.901
1614	SCLT1_KAN619-7_5.tif:0006-0695	1.651	50.031	0	424	50.504	50.196	0.79	82.623	15910	1.243	0.804	0.898	0.396333	1.18726	1624	CEP170_KAN619-7_5.tif:0006-0695	1.651	126.236	0	546	50.504	50.196	0.79	208.468	40143	1.243	0.804	0.898
1615	SCLT1_KAN619-7_5.tif:0007-0770	1.724	68.455	0	540	85.451	55.521	0.695	118.025	22727	2.222	0.45	0.897	0.611813	1.69597	1625	CEP170_KAN619-7_5.tif:0007-0770	1.724	111.889	0	663	85.451	55.521	0.695	192.91	37147	2.222	0.45	0.897
1616	SCLT1_KAN619-7_5.tif:0008-0911	0.805	14.761	0	112	32.807	65.668	0.883	11.882	2288	1.246	0.803	0.937	0.127529	0.170739	1626	CEP170_KAN619-7_5.tif:0008-0911	0.805	115.748	0	365	32.807	65.668	0.883	93.17	17941	1.246	0.803	0.937
1617	SCLT1_KAN619-7_5.tif:0009-1149	0.68	8.237	0	36	12	82.832	0.814	5.603	1079	1.117	0.895	0.897	0.075592	0.0805187	1627	CEP170_KAN619-7_5.tif:0009-1149	0.68	108.962	0	367	12	82.832	0.814	74.127	14274	1.117	0.895	0.897
1618	SCLT1_KAN619-7_5.tif:0010-1203	1.127	53.429	0	328	54.379	86.657	0.69	60.209	11594	1.582	0.632	0.849	0.667089	0.865185	1628	CEP170_KAN619-7_5.tif:0010-1203	1.127	80.092	0	315	54.379	86.657	0.69	90.257	17380	1.582	0.632	0.849
1629	SCLT1_KAN619-7_6.tif:0001-0144	1.397	62.829	0	449	82.063	10.363	0.703	87.769	16901	1.973	0.507	0.862	0.57504	1.26121	1639	CEP170_KAN619-7_6.tif:0001-0144	1.397	109.26	0	406	82.063	10.363	0.703	152.632	29391	1.973	0.507	0.862
1630	SCLT1_KAN619-7_6.tif:0002-0337	1.246	42.083	0	239	38.731	24.278	0.814	52.451	10100	1.598	0.626	0.899	0.301169	0.753697	1640	CEP170_KAN619-7_6.tif:0002-0337	1.246	139.733	0	556	38.731	24.278	0.814	174.157	33536	1.598	0.626	0.899
1631	SCLT1_KAN619-7_6.tif:0003-0358	0.971	45.93	0	188	75.128	25.795	0.848	44.604	8589	1.415	0.707	0.901	0.379557	0.640941	1641	CEP170_KAN619-7_6.tif:0003-0358	0.971	121.011	0	407	75.128	25.795	0.848	117.516	22629	1.415	0.707	0.901
1632	SCLT1_KAN619-7_6.tif:0004-0441	0.665	21.25	0	78	14.387	31.781	0.921	14.125	2720	1.293	0.773	0.931	0.172195	0.202976	1642	CEP170_KAN619-7_6.tif:0004-0441	0.665	123.406	0	328	14.387	31.781	0.921	82.031	15796	1.293	0.773	0.931
1633	SCLT1_KAN619-7_6.tif:0005-0487	0.898	80.971	0	503	50.587	35.091	0.885	72.746	14008	1.378	0.725	0.953	1.02203	1.04533	1643	CEP170_KAN619-7_6.tif:0005-0487	0.898	79.225	0	341	50.587	35.091	0.885	71.177	13706	1.378	0.725	0.953
1634	SCLT1_KAN619-7_6.tif:0006-0752	0.639	94.813	0	379	4.157	54.214	0.885	60.562	11662	1.145	0.873	0.901	1.03286	0.870259	1644	CEP170_KAN619-7_6.tif:0006-0752	0.639	91.797	0	250	4.157	54.214	0.885	58.636	11291	1.145	0.873	0.901
1635	SCLT1_KAN619-7_6.tif:0007-0824	0.94	85.862	0	434	42.274	59.355	0.896	80.707	15541	1.107	0.903	0.94	0.776002	1.15972	1645	CEP170_KAN619-7_6.tif:0007-0824	0.94	110.646	0	447	42.274	59.355	0.896	104.003	20027	1.107	0.903	0.94
1636	SCLT1_KAN619-7_6.tif:0008-0953	0.53	46.333	0	163	80.507	68.674	0.751	24.543	4726	2.001	0.5	0.923	0.440037	0.352671	1646	CEP170_KAN619-7_6.tif:0008-0953	0.53	105.294	0	230	80.507	68.674	0.751	55.774	10740	2.001	0.5	0.923
1637	SCLT1_KAN619-7_6.tif:0009-1047	0.55	21.575	0	119	54.842	75.426	0.888	11.877	2287	1.217	0.821	0.946	0.180805	0.170664	1647	CEP170_KAN619-7_6.tif:0009-1047	0.55	119.33	0	378	54.842	75.426	0.888	65.688	12649	1.217	0.821	0.946
1638	SCLT1_KAN619-7_6.tif:0010-1126	0.841	43.185	0	371	20.545	81.157	0.813	36.331	6996	1.644	0.608	0.908	0.396419	0.522066	1648	CEP170_KAN619-7_6.tif:0010-1126	0.841	108.938	0	283	20.545	81.157	0.813	91.649	17648	1.644	0.608	0.908
									AVERAGE	11259.3					0.840208
									SEM	747.318
										0.0542426
1649	SCLT1_KAN619-8_1.tif:0001-0050	1.252	75.871	0	471	34.434	3.628	0.752	94.957	18285	1.606	0.623	0.884	0.792863	1.36449	1658	CEP170_KAN619-8_1.tif:0001-0050	1.252	95.693	0	386	34.434	3.628	0.752	119.764	23062	1.606	0.623	0.884
1650	SCLT1_KAN619-8_1.tif:0002-0382	1.023	68.904	0	476	37.674	27.525	0.848	70.492	13574	1.123	0.89	0.906	0.43749	1.01294	1659	CEP170_KAN619-8_1.tif:0002-0382	1.023	157.497	0	477	37.674	27.525	0.848	161.128	31027	1.123	0.89	0.906
1651	SCLT1_KAN619-8_1.tif:0003-0409	1.117	61.93	0	444	43.601	29.475	0.802	69.147	13315	1.657	0.603	0.905	0.539222	0.993612	1660	CEP170_KAN619-8_1.tif:0003-0409	1.117	114.851	0	373	43.601	29.475	0.802	128.234	24693	1.657	0.603	0.905
1652	SCLT1_KAN619-8_1.tif:0004-0409	0.53	21.353	0	112	16.377	29.493	0.909	11.311	2178	1.233	0.811	0.932	0.202153	0.16253	1661	CEP170_KAN619-8_1.tif:0004-0409	0.53	105.627	0	278	16.377	29.493	0.909	55.951	10774	1.233	0.811	0.932
1653	SCLT1_KAN619-8_1.tif:0005-0423	0.888	60.433	0	300	73.526	30.505	0.819	53.666	10334	1.128	0.886	0.893	0.47763	0.771159	1662	CEP170_KAN619-8_1.tif:0005-0423	0.888	126.526	0	350	73.526	30.505	0.819	112.359	21636	1.128	0.886	0.893
1654	SCLT1_KAN619-8_1.tif:0006-0747	0.67	66.798	0	275	6.036	53.832	0.954	44.749	8617	1.211	0.826	0.931	0.490131	0.64303	1663	CEP170_KAN619-8_1.tif:0006-0747	0.67	136.287	0	494	6.036	53.832	0.954	91.301	17581	1.211	0.826	0.931
1655	SCLT1_KAN619-8_1.tif:0007-0812	0.55	28.104	0	120	72.617	58.56	1	15.47	2979	1.092	0.916	0.955	0.22654	0.222303	1664	CEP170_KAN619-8_1.tif:0007-0812	0.55	124.057	0	359	72.617	58.56	1	68.29	13150	1.092	0.916	0.955
1656	SCLT1_KAN619-8_1.tif:0008-0931	0.706	17.721	0	63	40.256	67.111	0.891	12.515	2410	1.264	0.791	0.932	0.133919	0.179843	1665	CEP170_KAN619-8_1.tif:0008-0931	0.706	132.324	0	420	40.256	67.111	0.891	93.456	17996	1.264	0.791	0.932
1657	SCLT1_KAN619-8_1.tif:0009-1023	0.841	55.173	0	317	25.676	73.671	0.861	46.416	8938	1.315	0.761	0.918	0.636383	0.666985	1666	CEP170_KAN619-8_1.tif:0009-1023	0.841	86.698	0	272	25.676	73.671	0.861	72.938	14045	1.315	0.761	0.918
1667	SCLT1_KAN619-8_2.tif:0001-0302	0.727	60.614	0	260	51.709	21.775	0.87	44.069	8486	1.202	0.832	0.921	0.613283	0.633255	1674	CEP170_KAN619-8_2.tif:0001-0302	0.727	98.836	0	250	51.709	21.775	0.87	71.858	13837	1.202	0.832	0.921
1668	SCLT1_KAN619-8_2.tif:0002-0426	1.007	71.201	0	367	85.758	30.678	0.955	71.733	13813	1.021	0.98	0.913	0.452203	1.03077	1675	CEP170_KAN619-8_2.tif:0002-0426	1.007	157.454	0	543	85.758	30.678	0.955	158.63	30546	1.021	0.98	0.913
1669	SCLT1_KAN619-8_2.tif:0003-0524	0.592	41.228	0	203	28.406	37.773	0.785	24.408	4700	1.798	0.556	0.923	0.384993	0.35073	1676	CEP170_KAN619-8_2.tif:0003-0524	0.592	107.088	0	247	28.406	37.773	0.785	63.398	12208	1.798	0.556	0.923
1670	SCLT1_KAN619-8_2.tif:0004-0646	1.018	74.041	0	491	44.714	46.563	0.87	75.363	14512	1.319	0.758	0.931	0.545461	1.08294	1677	CEP170_KAN619-8_2.tif:0004-0646	1.018	135.74	0	626	44.714	46.563	0.87	138.164	26605	1.319	0.758	0.931
1671	SCLT1_KAN619-8_2.tif:0005-0854	0.737	66.246	0	332	11.37	61.568	0.882	48.852	9407	1.307	0.765	0.931	0.621457	0.701983	1678	CEP170_KAN619-8_2.tif:0005-0854	0.737	106.599	0	304	11.37	61.568	0.882	78.609	15137	1.307	0.765	0.931
1672	SCLT1_KAN619-8_2.tif:0006-0950	1.49	86.721	0	623	65.462	68.477	0.725	129.252	24889	1.834	0.545	0.874	0.678008	1.8573	1679	CEP170_KAN619-8_2.tif:0006-0950	1.49	127.906	0	511	65.462	68.477	0.725	190.635	36709	1.834	0.545	0.874
1673	SCLT1_KAN619-8_2.tif:0007-1080	0.639	44.854	0	216	28.275	77.889	0.91	28.651	5517	1.354	0.739	0.925	0.37124	0.411698	1680	CEP170_KAN619-8_2.tif:0007-1080	0.639	120.821	0	337	28.275	77.889	0.91	77.175	14861	1.354	0.739	0.925
1681	SCLT1_KAN619-8_3.tif:0001-0232	0.602	20.267	0	101	79.158	16.775	0.905	12.209	2351	1.187	0.843	0.955	0.16365	0.17544	1687	CEP170_KAN619-8_3.tif:0001-0232	0.602	123.845	0	395	79.158	16.775	0.905	74.605	14366	1.187	0.843	0.955
1682	SCLT1_KAN619-8_3.tif:0002-0262	0.94	52.453	0	379	36.411	18.906	0.867	49.304	9494	1.059	0.945	0.921	0.311759	0.708475	1688	CEP170_KAN619-8_3.tif:0002-0262	0.94	168.249	0	623	36.411	18.906	0.867	158.147	30453	1.059	0.945	0.921
1683	SCLT1_KAN619-8_3.tif:0003-0586	0.654	52.23	0	215	32.509	42.273	0.881	34.176	6581	1.398	0.715	0.926	0.45883	0.491097	1689	CEP170_KAN619-8_3.tif:0003-0586	0.654	113.833	0	356	32.509	42.273	0.881	74.485	14343	1.398	0.715	0.926
1684	SCLT1_KAN619-8_3.tif:0004-0768	0.576	32.315	0	116	8.701	55.366	0.959	18.628	3587	1.107	0.903	0.969	0.227717	0.267674	1690	CEP170_KAN619-8_3.tif:0004-0768	0.576	141.91	0	547	8.701	55.366	0.959	81.802	15752	1.107	0.903	0.969
1685	SCLT1_KAN619-8_3.tif:0005-0830	0.691	36.805	0	97	31.343	59.842	0.93	25.42	4895	1.088	0.919	0.937	0.262466	0.365282	1691	CEP170_KAN619-8_3.tif:0005-0830	0.691	140.226	0	468	31.343	59.842	0.93	96.852	18650	1.088	0.919	0.937
1686	SCLT1_KAN619-8_3.tif:0006-0945	0.623	76.992	0	333	65.954	68.112	0.936	47.979	9239	1.093	0.914	0.96	0.597839	0.689446	1692	CEP170_KAN619-8_3.tif:0006-0945	0.623	128.783	0	405	65.954	68.112	0.936	80.255	15454	1.093	0.914	0.96
1693	SCLT1_KAN619-8_4.tif:0001-0148	0.924	38.157	0	178	72.249	10.616	0.656	35.272	6792	1.701	0.588	0.828	0.444532	0.506843	1702	CEP170_KAN619-8_4.tif:0001-0148	0.924	85.837	0	265	72.249	10.616	0.656	79.346	15279	1.701	0.588	0.828
1694	SCLT1_KAN619-8_4.tif:0002-0293	0.66	24.787	0	111	17.209	21.108	0.874	16.348	3148	1.462	0.684	0.955	0.189696	0.234915	1703	CEP170_KAN619-8_4.tif:0002-0293	0.66	130.669	0	353	17.209	21.108	0.874	86.18	16595	1.462	0.684	0.955
1695	SCLT1_KAN619-8_4.tif:0003-0433	0.53	53.422	0	312	52.996	31.223	0.795	28.297	5449	1.552	0.645	0.876	0.556759	0.406623	1704	CEP170_KAN619-8_4.tif:0003-0433	0.53	95.951	0	270	52.996	31.223	0.795	50.825	9787	1.552	0.645	0.876
1696	SCLT1_KAN619-8_4.tif:0004-0476	0.743	66.902	0	343	27.483	34.354	0.937	49.683	9567	1.051	0.952	0.944	0.556253	0.713923	1705	CEP170_KAN619-8_4.tif:0004-0476	0.743	120.273	0	309	27.483	34.354	0.937	89.317	17199	1.051	0.952	0.944
1697	SCLT1_KAN619-8_4.tif:0005-0524	0.898	41.566	0	305	41.165	37.723	0.81	37.344	7191	1.478	0.676	0.901	0.393187	0.536617	1706	CEP170_KAN619-8_4.tif:0005-0524	0.898	105.717	0	370	41.165	37.723	0.81	94.977	18289	1.478	0.676	0.901
1698	SCLT1_KAN619-8_4.tif:0006-0680	0.841	58.685	0	372	83.781	49.009	0.891	49.371	9507	1.186	0.844	0.928	0.46768	0.709445	1707	CEP170_KAN619-8_4.tif:0006-0680	0.841	125.481	0	436	83.781	49.009	0.891	105.566	20328	1.186	0.844	0.928
1699	SCLT1_KAN619-8_4.tif:0007-0920	0.997	88.87	0	393	39.537	66.295	0.954	88.611	17063	1.127	0.887	0.932	0.766497	1.2733	1708	CEP170_KAN619-8_4.tif:0007-0920	0.997	115.943	0	446	39.537	66.295	0.954	115.605	22261	1.127	0.887	0.932
1700	SCLT1_KAN619-8_4.tif:0008-1054	0.997	67.656	0	410	16.884	75.986	0.816	67.459	12990	1.649	0.607	0.937	0.813196	0.969359	1709	CEP170_KAN619-8_4.tif:0008-1054	0.997	83.198	0	252	16.884	75.986	0.816	82.955	15974	1.649	0.607	0.937
1701	SCLT1_KAN619-8_4.tif:0009-1187	0.613	59.186	0	184	53.908	85.586	0.812	36.269	6984	1.462	0.684	0.918	0.595244	0.52117	1710	CEP170_KAN619-8_4.tif:0009-1187	0.613	99.432	0	212	53.908	85.586	0.812	60.931	11733	1.462	0.684	0.918
1711	SCLT1_KAN619-8_5.tif:0001-0296	0.961	54.281	0	296	81.229	21.349	0.847	52.15	10042	1.13	0.885	0.925	0.498808	0.749369	1721	CEP170_KAN619-8_5.tif:0001-0296	0.961	108.822	0	403	81.229	21.349	0.847	104.548	20132	1.13	0.885	0.925
1712	SCLT1_KAN619-8_5.tif:0002-0321	0.66	24.992	0	141	44.912	23.157	0.913	16.483	3174	1.117	0.895	0.924	0.201141	0.236855	1722	CEP170_KAN619-8_5.tif:0002-0321	0.66	124.252	0	382	44.912	23.157	0.913	81.948	15780	1.117	0.895	0.924
1713	SCLT1_KAN619-8_5.tif:0003-0337	0.909	40.966	0	247	18.016	24.362	0.838	37.23	7169	1.416	0.706	0.916	0.320202	0.534976	1723	CEP170_KAN619-8_5.tif:0003-0337	0.909	127.937	0	438	18.016	24.362	0.838	116.269	22389	1.416	0.706	0.916
1714	SCLT1_KAN619-8_5.tif:0004-0557	0.94	121.061	0	626	74.005	40.134	0.917	113.792	21912	1.161	0.862	0.955	0.976253	1.63515	1724	CEP170_KAN619-8_5.tif:0004-0557	0.94	124.006	0	319	74.005	40.134	0.917	116.56	22445	1.161	0.862	0.955
1715	SCLT1_KAN619-8_5.tif:0005-0706	0.982	54.212	0	284	6.057	50.911	0.839	53.209	10246	1.398	0.715	0.911	0.45079	0.764592	1725	CEP170_KAN619-8_5.tif:0005-0706	0.982	120.259	0	371	6.057	50.911	0.839	118.035	22729	1.398	0.715	0.911
1716	SCLT1_KAN619-8_5.tif:0006-0839	1.142	77.759	0	548	46.401	60.448	0.738	88.839	17107	1.761	0.568	0.894	0.775019	1.27658	1726	CEP170_KAN619-8_5.tif:0006-0839	1.142	100.332	0	362	46.401	60.448	0.738	114.628	22073	1.761	0.568	0.894
1717	SCLT1_KAN619-8_5.tif:0007-0841	1.065	40.034	0	212	68.77	60.606	0.83	42.62	8207	1.341	0.746	0.901	0.247684	0.612435	1727	CEP170_KAN619-8_5.tif:0007-0841	1.065	161.634	0	530	68.77	60.606	0.83	172.075	33135	1.341	0.746	0.901
1718	SCLT1_KAN619-8_5.tif:0008-0932	0.779	74.447	0	356	8.339	67.121	0.709	57.992	11167	1.758	0.569	0.847	0.830507	0.83332	1728	CEP170_KAN619-8_5.tif:0008-0932	0.779	89.64	0	263	8.339	67.121	0.709	69.827	13446	1.758	0.569	0.847
1719	SCLT1_KAN619-8_5.tif:0009-1120	0.576	52.072	0	300	30.122	80.754	0.947	30.016	5780	1.171	0.854	0.933	0.459277	0.431324	1729	CEP170_KAN619-8_5.tif:0009-1120	0.576	113.378	0	322	30.122	80.754	0.947	65.356	12585	1.171	0.854	0.933
1720	SCLT1_KAN619-8_5.tif:0010-1272	0.618	74.588	0	327	59.358	91.677	0.902	46.094	8876	1.349	0.741	0.96	0.515477	0.662358	1730	CEP170_KAN619-8_5.tif:0010-1272	0.618	144.697	0	436	59.358	91.677	0.902	89.421	17219	1.349	0.741	0.96
1731	SCLT1_KAN619-8_6.tif:0001-0392	0.81	27.974	0	106	46.021	28.294	0.79	22.663	4364	1.63	0.614	0.91	0.231598	0.325657	1739	CEP170_KAN619-8_6.tif:0001-0392	0.81	120.788	0	321	46.021	28.294	0.79	97.854	18843	1.63	0.614	0.91
1732	SCLT1_KAN619-8_6.tif:0002-0412	0.634	34.139	0	331	65.781	29.734	0.863	21.629	4165	1.252	0.798	0.942	0.279081	0.310807	1740	CEP170_KAN619-8_6.tif:0002-0412	0.634	122.328	0	386	65.781	29.734	0.863	77.503	14924	1.252	0.798	0.942
1733	SCLT1_KAN619-8_6.tif:0003-0430	0.748	49.062	0	265	72.274	30.998	0.895	36.69	7065	1.277	0.783	0.944	0.433382	0.527215	1741	CEP170_KAN619-8_6.tif:0003-0430	0.748	113.208	0	307	72.274	30.998	0.895	84.659	16302	1.277	0.783	0.944
1734	SCLT1_KAN619-8_6.tif:0004-0622	0.701	30.919	0	108	22.378	44.838	0.894	21.676	4174	1.33	0.752	0.947	0.250646	0.311478	1742	CEP170_KAN619-8_6.tif:0004-0622	0.701	123.356	0	340	22.378	44.838	0.894	86.481	16653	1.33	0.752	0.947
1735	SCLT1_KAN619-8_6.tif:0005-0753	1.194	51.526	0	368	57.043	54.287	0.78	61.544	11851	1.251	0.799	0.883	0.424752	0.884363	1743	CEP170_KAN619-8_6.tif:0005-0753	1.194	121.309	0	414	57.043	54.287	0.78	144.894	27901	1.251	0.799	0.883
1736	SCLT1_KAN619-8_6.tif:0006-0794	0.753	82.779	0	340	45.802	57.23	0.925	62.333	12003	1.169	0.856	0.951	0.560495	0.895706	1744	CEP170_KAN619-8_6.tif:0006-0794	0.753	147.69	0	493	45.802	57.23	0.925	111.211	21415	1.169	0.856	0.951
1737	SCLT1_KAN619-8_6.tif:0007-0986	0.898	49.133	0	266	81.041	71.116	0.713	44.142	8500	1.75	0.572	0.869	0.477582	0.6343	1745	CEP170_KAN619-8_6.tif:0007-0986	0.898	102.879	0	334	81.041	71.116	0.713	92.428	17798	1.75	0.572	0.869
1738	SCLT1_KAN619-8_6.tif:0008-1005	0.924	37.921	0	250	31.831	72.424	0.893	35.054	6750	1.325	0.755	0.927	0.276696	0.503708	1746	CEP170_KAN619-8_6.tif:0008-1005	0.924	137.051	0	400	31.831	72.424	0.893	126.687	24395	1.325	0.755	0.927
									AVERAGE	8966.2					0.669089
									SEM	717.387
										7.90133e-05
1747	SCLT1_KAN619-9_1.tif:0001-0038	1.252	86.967	0	524	35.696	2.737	0.802	108.843	20959	1.533	0.652	0.904	0.575813	1.56403	1756	CEP170_KAN619-9_1.tif:0001-0038	1.252	151.033	0	525	35.696	2.737	0.802	189.025	36399	1.533	0.652	0.904
1748	SCLT1_KAN619-9_1.tif:0002-0191	1.132	107.642	0	469	28.106	13.75	0.891	121.862	23466	1.238	0.808	0.938	0.753734	1.75111	1757	CEP170_KAN619-9_1.tif:0002-0191	1.132	142.812	0	621	28.106	13.75	0.891	161.678	31133	1.238	0.808	0.938
1749	SCLT1_KAN619-9_1.tif:0003-0244	1.241	84.084	0	500	20.589	17.616	0.82	104.361	20096	1.653	0.605	0.905	0.74207	1.49963	1758	CEP170_KAN619-9_1.tif:0003-0244	1.241	113.31	0	417	20.589	17.616	0.82	140.636	27081	1.653	0.605	0.905
1750	SCLT1_KAN619-9_1.tif:0004-0333	0.602	38.362	0	131	73.141	23.988	0.92	23.11	4450	1.202	0.832	0.921	0.311712	0.332074	1759	CEP170_KAN619-9_1.tif:0004-0333	0.602	123.069	0	367	73.141	23.988	0.92	74.137	14276	1.202	0.832	0.921
1751	SCLT1_KAN619-9_1.tif:0005-0546	0.914	110.557	0	404	27.656	39.313	0.871	101.048	19458	1.621	0.617	0.97	1.15911	1.45202	1760	CEP170_KAN619-9_1.tif:0005-0546	0.914	95.381	0	386	27.656	39.313	0.871	87.177	16787	1.621	0.617	0.97
1752	SCLT1_KAN619-9_1.tif:0006-0814	1.142	98.718	0	884	85.675	58.653	0.821	112.785	21718	1.446	0.691	0.911	0.716387	1.62067	1761	CEP170_KAN619-9_1.tif:0006-0814	1.142	137.8	0	457	85.675	58.653	0.821	157.435	30316	1.446	0.691	0.911
1753	SCLT1_KAN619-9_1.tif:0007-0836	0.935	73.194	0	381	42.422	60.235	0.912	68.42	13175	1.39	0.719	0.95	0.535809	0.983164	1762	CEP170_KAN619-9_1.tif:0007-0836	0.935	136.606	0	586	42.422	60.235	0.912	127.694	24589	1.39	0.719	0.95
1754	SCLT1_KAN619-9_1.tif:0008-1052	0.914	42.756	0	209	42.657	75.889	0.799	39.078	7525	1.698	0.589	0.903	0.341983	0.561542	1763	CEP170_KAN619-9_1.tif:0008-1052	0.914	125.023	0	377	42.657	75.889	0.799	114.27	22004	1.698	0.589	0.903
1755	SCLT1_KAN619-9_1.tif:0009-1219	0.628	85.298	0	364	34.366	87.8	0.801	53.598	10321	1.357	0.737	0.9	1.06787	0.770189	1764	CEP170_KAN619-9_1.tif:0009-1219	0.628	79.876	0	280	34.366	87.8	0.801	50.192	9665	1.357	0.737	0.9
1765	SCLT1_KAN619-9_2.tif:0001-0023	1.303	74.673	0	512	35.535	1.676	0.721	97.335	18743	2.131	0.469	0.949	0.788316	1.39867	1771	CEP170_KAN619-9_2.tif:0001-0023	1.303	94.725	0	396	35.535	1.676	0.721	123.472	23776	2.131	0.469	0.949
1766	SCLT1_KAN619-9_2.tif:0002-0723	1.127	100.756	0	993	67.319	52.185	0.826	113.543	21864	1.281	0.781	0.91	0.786164	1.63157	1772	CEP170_KAN619-9_2.tif:0002-0723	1.127	128.161	0	446	67.319	52.185	0.826	144.427	27811	1.281	0.781	0.91
1767	SCLT1_KAN619-9_2.tif:0003-0737	0.956	95.788	0	577	30.985	53.115	0.817	91.529	17625	1.393	0.718	0.904	0.910288	1.31524	1773	CEP170_KAN619-9_2.tif:0003-0737	0.956	105.228	0	380	30.985	53.115	0.817	100.55	19362	1.393	0.718	0.904
1768	SCLT1_KAN619-9_2.tif:0004-1030	0.821	81.158	0	453	68.473	74.286	0.913	66.592	12823	1.143	0.875	0.924	0.831313	0.956897	1774	CEP170_KAN619-9_2.tif:0004-1030	0.821	97.627	0	350	68.473	74.286	0.913	80.104	15425	1.143	0.875	0.924
1769	SCLT1_KAN619-9_2.tif:0005-1049	0.94	64.989	0	325	33.966	75.554	0.867	61.087	11763	1.608	0.622	0.938	0.703823	0.877796	1775	CEP170_KAN619-9_2.tif:0005-1049	0.94	92.337	0	444	33.966	75.554	0.867	86.793	16713	1.608	0.622	0.938
1770	SCLT1_KAN619-9_2.tif:0006-1250	0.675	55.9	0	271	80.837	90.114	0.829	37.739	7267	1.535	0.652	0.897	0.535954	0.542289	1776	CEP170_KAN619-9_2.tif:0006-1250	0.675	104.3	0	319	80.837	90.114	0.829	70.414	13559	1.535	0.652	0.897
1777	SCLT1_KAN619-9_3.tif:0001-0129	0.701	70.474	0	381	11.092	9.355	0.725	49.408	9514	1.586	0.631	0.846	0.939376	0.709968	1786	CEP170_KAN619-9_3.tif:0001-0129	0.701	75.022	0	217	11.092	9.355	0.725	52.596	10128	1.586	0.631	0.846
1778	SCLT1_KAN619-9_3.tif:0002-0263	1.137	71.233	0	379	19.61	18.958	0.77	81.013	15600	1.794	0.557	0.912	0.618802	1.16413	1787	CEP170_KAN619-9_3.tif:0002-0263	1.137	115.114	0	522	19.61	18.958	0.77	130.919	25210	1.794	0.557	0.912
1779	SCLT1_KAN619-9_3.tif:0003-0320	1.117	54.702	0	472	41.982	23.046	0.795	61.077	11761	1.616	0.619	0.907	0.464439	0.877647	1788	CEP170_KAN619-9_3.tif:0003-0320	1.117	117.781	0	378	41.982	23.046	0.795	131.506	25323	1.616	0.619	0.907
1780	SCLT1_KAN619-9_3.tif:0004-0446	1.397	64.647	0	460	72.186	32.12	0.781	90.309	17390	2.122	0.471	0.961	0.817391	1.2977	1789	CEP170_KAN619-9_3.tif:0004-0446	1.397	79.089	0	425	72.186	32.12	0.781	110.484	21275	2.122	0.471	0.961
1781	SCLT1_KAN619-9_3.tif:0005-0516	0.545	10.8	0	71	7.522	37.21	0.935	5.889	1134	1.116	0.896	0.946	0.0894604	0.084623	1790	CEP170_KAN619-9_3.tif:0005-0516	0.545	120.724	0	332	7.522	37.21	0.935	65.828	12676	1.116	0.896	0.946
1782	SCLT1_KAN619-9_3.tif:0006-0658	1.106	65.286	0	539	36.676	47.497	0.728	72.216	13906	1.552	0.644	0.877	0.799379	1.03771	1791	CEP170_KAN619-9_3.tif:0006-0658	1.106	81.671	0	308	36.676	47.497	0.728	90.34	17396	1.552	0.644	0.877
1783	SCLT1_KAN619-9_3.tif:0007-0806	0.992	69.623	0	504	81.79	58.102	0.829	69.058	13298	1.665	0.601	0.929	0.636024	0.992343	1792	CEP170_KAN619-9_3.tif:0007-0806	0.992	109.466	0	410	81.79	58.102	0.829	108.578	20908	1.665	0.601	0.929
1784	SCLT1_KAN619-9_3.tif:0008-0906	0.841	8.753	0	41	32.653	65.278	0.882	7.364	1418	1.287	0.777	0.915	0.0720931	0.105816	1793	CEP170_KAN619-9_3.tif:0008-0906	0.841	121.414	0	395	32.653	65.278	0.882	102.144	19669	1.287	0.777	0.915
1785	SCLT1_KAN619-9_3.tif:0009-1090	0.846	89.067	0	406	73.242	78.57	0.875	75.394	14518	1.303	0.767	0.921	0.936524	1.08338	1794	CEP170_KAN619-9_3.tif:0009-1090	0.846	95.104	0	290	73.242	78.57	0.875	80.504	15502	1.303	0.767	0.921
1795	SCLT1_KAN619-9_4.tif:0001-0099	1.122	80.384	0	548	42.521	7.184	0.7	90.169	17363	2.158	0.463	0.85	0.768751	1.29569	1803	CEP170_KAN619-9_4.tif:0001-0099	1.122	104.565	0	278	42.521	7.184	0.7	117.292	22586	2.158	0.463	0.85
1796	SCLT1_KAN619-9_4.tif:0002-0194	0.602	78.586	0	250	65.244	13.975	0.96	47.341	9116	1.058	0.945	0.943	0.733918	0.680268	1804	CEP170_KAN619-9_4.tif:0002-0194	0.602	107.078	0	206	65.244	13.975	0.96	64.504	12421	1.058	0.945	0.943
1797	SCLT1_KAN619-9_4.tif:0003-0404	0.81	99.949	0	490	28.873	29.115	0.837	80.972	15592	1.628	0.614	0.937	0.942172	1.16353	1805	CEP170_KAN619-9_4.tif:0003-0404	0.81	106.083	0	416	28.873	29.115	0.837	85.941	16549	1.628	0.614	0.937
1798	SCLT1_KAN619-9_4.tif:0004-0427	1.329	47.711	0	377	84.579	30.697	0.732	63.429	12214	1.889	0.529	0.868	0.447547	0.911451	1806	CEP170_KAN619-9_4.tif:0004-0427	1.329	106.605	0	335	84.579	30.697	0.732	141.726	27291	1.889	0.529	0.868
1799	SCLT1_KAN619-9_4.tif:0005-0531	1.028	78.54	0	412	58.185	38.205	0.852	80.759	15551	1.365	0.733	0.917	0.935173	1.16047	1807	CEP170_KAN619-9_4.tif:0005-0531	1.028	83.985	0	318	58.185	38.205	0.852	86.357	16629	1.365	0.733	0.917
1800	SCLT1_KAN619-9_4.tif:0006-0847	0.997	55.953	0	331	41.152	61.019	0.775	55.79	10743	1.867	0.536	0.908	0.477594	0.80168	1808	CEP170_KAN619-9_4.tif:0006-0847	0.997	117.156	0	392	41.152	61.019	0.775	116.815	22494	1.867	0.536	0.908
1801	SCLT1_KAN619-9_4.tif:0007-0872	0.576	59.162	0	192	12.088	62.861	0.935	34.103	6567	1.421	0.704	0.921	0.570944	0.490052	1809	CEP170_KAN619-9_4.tif:0007-0872	0.576	103.622	0	241	12.088	62.861	0.935	59.732	11502	1.421	0.704	0.921
1802	SCLT1_KAN619-9_4.tif:0008-0999	0.93	50.38	0	301	26.783	71.983	0.794	46.832	9018	1.68	0.595	0.906	0.490189	0.672954	1810	CEP170_KAN619-9_4.tif:0008-0999	0.93	102.777	0	425	26.783	71.983	0.794	95.538	18397	1.68	0.595	0.906
1811	SCLT1_KAN619-9_5.tif:0001-0020	0.862	102.048	0	361	25.451	1.448	0.922	87.972	16940	1.121	0.892	0.971	0.765304	1.26412	1823	CEP170_KAN619-9_5.tif:0001-0020	0.862	133.343	0	461	25.451	1.448	0.922	114.95	22135	1.121	0.892	0.971
1812	SCLT1_KAN619-9_5.tif:0002-0283	1.231	70.43	0	404	9.012	20.372	0.82	86.684	16692	1.349	0.741	0.898	0.498075	1.24561	1824	CEP170_KAN619-9_5.tif:0002-0283	1.231	141.405	0	500	9.012	20.372	0.82	174.038	33513	1.349	0.741	0.898
1813	SCLT1_KAN619-9_5.tif:0003-0320	0.701	68.037	0	310	24.378	23.105	0.839	47.699	9185	1.465	0.683	0.925	0.600445	0.685417	1825	CEP170_KAN619-9_5.tif:0003-0320	0.701	113.311	0	342	24.378	23.105	0.839	79.44	15297	1.465	0.683	0.925
1814	SCLT1_KAN619-9_5.tif:0004-0413	0.763	9.156	0	51	72.584	29.762	0.938	6.99	1346	1.243	0.805	0.958	0.0539977	0.100443	1826	CEP170_KAN619-9_5.tif:0004-0413	0.763	169.571	0	657	72.584	29.762	0.938	129.45	24927	1.243	0.805	0.958
1815	SCLT1_KAN619-9_5.tif:0005-0504	0.805	119	0	504	74.537	36.291	0.896	95.788	18445	1.175	0.851	0.925	1.05617	1.37643	1827	CEP170_KAN619-9_5.tif:0005-0504	0.805	112.671	0	344	74.537	36.291	0.896	90.693	17464	1.175	0.851	0.925
1816	SCLT1_KAN619-9_5.tif:0006-0542	0.727	86.721	0	410	56.49	39.051	0.893	63.05	12141	1.183	0.846	0.933	0.785876	0.906004	1828	CEP170_KAN619-9_5.tif:0006-0542	0.727	110.35	0	258	56.49	39.051	0.893	80.229	15449	1.183	0.846	0.933
1817	SCLT1_KAN619-9_5.tif:0007-0695	0.722	63.626	0	207	19.247	50.058	0.812	45.928	8844	1.759	0.569	0.924	0.610689	0.65997	1829	CEP170_KAN619-9_5.tif:0007-0695	0.722	104.187	0	230	19.247	50.058	0.812	75.207	14482	1.759	0.569	0.924
1818	SCLT1_KAN619-9_5.tif:0008-0861	0.867	35.275	0	139	74.432	62.077	0.941	30.593	5891	1.223	0.817	0.963	0.249703	0.439607	1830	CEP170_KAN619-9_5.tif:0008-0861	0.867	141.269	0	423	74.432	62.077	0.941	122.517	23592	1.223	0.817	0.963
1819	SCLT1_KAN619-9_5.tif:0009-0870	1.018	85.148	0	442	38.012	62.694	0.791	86.668	16689	1.332	0.751	0.885	0.845013	1.24539	1831	CEP170_KAN619-9_5.tif:0009-0870	1.018	100.765	0	408	38.012	62.694	0.791	102.565	19750	1.332	0.751	0.885
1820	SCLT1_KAN619-9_5.tif:0010-1020	0.54	54	0	257	1.957	73.526	0.898	29.165	5616	1.208	0.828	0.945	0.501832	0.419085	1832	CEP170_KAN619-9_5.tif:0010-1020	0.54	107.606	0	281	1.957	73.526	0.898	58.117	11191	1.208	0.828	0.945
1821	SCLT1_KAN619-9_5.tif:0011-1080	0.857	103.582	0	543	48.125	77.843	0.856	88.756	17091	1.338	0.747	0.909	0.861398	1.27539	1833	CEP170_KAN619-9_5.tif:0011-1080	0.857	120.248	0	325	48.125	77.843	0.856	103.037	19841	1.338	0.747	0.909
1822	SCLT1_KAN619-9_5.tif:0012-1253	0.571	110.173	0	486	23.931	90.28	0.778	62.936	12119	1.284	0.779	0.891	1.33308	0.904362	1834	CEP170_KAN619-9_5.tif:0012-1253	0.571	82.645	0	182	23.931	90.28	0.778	47.211	9091	1.284	0.779	0.891
1835	SCLT1_KAN619-9_6.tif:0001-0051	0.582	60.125	0	244	8.863	3.7	0.927	34.971	6734	1.322	0.757	0.941	0.524455	0.502514	1845	CEP170_KAN619-9_6.tif:0001-0051	0.582	114.643	0	332	8.863	3.7	0.927	66.68	12840	1.322	0.757	0.941
1836	SCLT1_KAN619-9_6.tif:0002-0270	0.597	42.861	0	143	16.374	19.498	0.924	25.597	4929	1.156	0.865	0.947	0.366006	0.367819	1846	CEP170_KAN619-9_6.tif:0002-0270	0.597	117.104	0	303	16.374	19.498	0.924	69.936	13467	1.156	0.865	0.947
1837	SCLT1_KAN619-9_6.tif:0003-0367	0.971	96.786	0	610	77.436	26.476	0.819	93.991	18099	1.783	0.561	0.959	0.913906	1.35061	1847	CEP170_KAN619-9_6.tif:0003-0367	0.971	105.904	0	501	77.436	26.476	0.819	102.845	19804	1.783	0.561	0.959
1838	SCLT1_KAN619-9_6.tif:0004-0395	0.805	127.213	0	569	33.169	28.507	0.905	102.398	19718	1.127	0.887	0.939	1.08699	1.47143	1848	CEP170_KAN619-9_6.tif:0004-0395	0.805	117.032	0	344	33.169	28.507	0.905	94.204	18140	1.127	0.887	0.939
1839	SCLT1_KAN619-9_6.tif:0005-0626	0.8	108.948	0	530	45.414	45.117	0.807	87.131	16778	1.278	0.782	0.914	1.16961	1.25203	1849	CEP170_KAN619-9_6.tif:0005-0626	0.8	93.149	0	274	45.414	45.117	0.807	74.496	14345	1.278	0.782	0.914
1840	SCLT1_KAN619-9_6.tif:0006-0688	0.748	68.146	0	219	8.87	49.595	0.919	50.96	9813	1.198	0.835	0.944	0.519784	0.73228	1850	CEP170_KAN619-9_6.tif:0006-0688	0.748	131.104	0	377	8.87	49.595	0.919	98.041	18879	1.198	0.835	0.944
1841	SCLT1_KAN619-9_6.tif:0007-0771	0.623	100.733	0	572	62.115	55.617	0.839	62.775	12088	1.306	0.766	0.889	0.973582	0.902049	1851	CEP170_KAN619-9_6.tif:0007-0771	0.623	103.467	0	230	62.115	55.617	0.839	64.478	12416	1.306	0.766	0.889
1842	SCLT1_KAN619-9_6.tif:0008-0801	0.961	93.081	0	515	34.223	57.758	0.878	89.426	17220	1.186	0.843	0.902	0.962818	1.28502	1852	CEP170_KAN619-9_6.tif:0008-0801	0.961	96.676	0	256	34.223	57.758	0.878	92.879	17885	1.186	0.843	0.902
1843	SCLT1_KAN619-9_6.tif:0009-0982	0.711	87.832	0	406	66.885	70.768	0.851	62.489	12033	1.36	0.735	0.923	0.826669	0.897944	1853	CEP170_KAN619-9_6.tif:0009-0982	0.711	106.248	0	245	66.885	70.768	0.851	75.591	14556	1.36	0.735	0.923
1844	SCLT1_KAN619-9_6.tif:0010-1265	0.727	98.207	0	535	91.544	91.207	0.848	71.401	13749	1.403	0.713	0.924	0.984462	1.026	1854	CEP170_KAN619-9_6.tif:0010-1265	0.727	99.757	0	269	91.544	91.207	0.848	72.527	13966	1.403	0.713	0.924
									AVERAGE	12928.1					0.964738
									SEM	754.666
										0.670182
1	SCLT1_KAN619-10_1.tif:0001-0196	1.226	69.445	0	374	72.739	14.132	0.856	85.11	16389	1.482	0.675	0.918	0.694449	1.223	8	CEP170_KAN619-10_1.tif:0001-0196	1.226	100	0	416	72.739	14.132	0.856	122.558	23600	1.482	0.675	0.918
2	SCLT1_KAN619-10_1.tif:0002-0286	1.065	103.605	0	701	31.153	20.647	0.845	110.297	21239	1.184	0.845	0.928	0.722587	1.58493	9	CEP170_KAN619-10_1.tif:0002-0286	1.065	143.38	0	512	31.153	20.647	0.845	152.642	29393	1.184	0.845	0.928
3	SCLT1_KAN619-10_1.tif:0003-0433	1.013	63.692	0	402	8.448	31.237	0.85	64.499	12420	1.077	0.929	0.892	0.598929	0.926824	10	CEP170_KAN619-10_1.tif:0003-0433	1.013	106.344	0	433	8.448	31.237	0.85	107.69	20737	1.077	0.929	0.892
4	SCLT1_KAN619-10_1.tif:0004-0496	0.815	47.019	0	231	54.466	35.807	0.917	38.336	7382	1.079	0.927	0.946	0.40902	0.55087	11	CEP170_KAN619-10_1.tif:0004-0496	0.815	114.955	0	534	54.466	35.807	0.917	93.726	18048	1.079	0.927	0.946
5	SCLT1_KAN619-10_1.tif:0005-0828	0.846	64.748	0	490	47.498	59.646	0.854	54.808	10554	1.178	0.849	0.926	0.512255	0.787576	12	CEP170_KAN619-10_1.tif:0005-0828	0.846	126.399	0	425	47.498	59.646	0.854	106.994	20603	1.178	0.849	0.926
6	SCLT1_KAN619-10_1.tif:0006-0844	0.857	77.424	0	544	13.466	60.85	0.873	66.342	12775	1.234	0.81	0.957	0.666545	0.953315	13	CEP170_KAN619-10_1.tif:0006-0844	0.857	116.158	0	418	13.466	60.85	0.873	99.532	19166	1.234	0.81	0.957
7	SCLT1_KAN619-10_1.tif:0007-1209	1.101	24.915	0	212	65.339	87.127	0.859	27.43	5282	1.41	0.709	0.904	0.182737	0.394161	14	CEP170_KAN619-10_1.tif:0007-1209	1.101	136.344	0	372	65.339	87.127	0.859	150.108	28905	1.41	0.709	0.904
15	SCLT1_KAN619-10_2.tif:0001-0056	0.758	42.521	0	197	44.087	4.085	0.907	32.239	6208	1.013	0.988	0.945	0.304433	0.463263	26	CEP170_KAN619-10_2.tif:0001-0056	0.758	139.671	0	432	44.087	4.085	0.907	105.899	20392	1.013	0.988	0.945
16	SCLT1_KAN619-10_2.tif:0002-0122	0.623	83.583	0	305	78.949	8.764	0.898	52.087	10030	1.172	0.853	0.93	0.832572	0.748473	27	CEP170_KAN619-10_2.tif:0002-0122	0.623	100.392	0	329	78.949	8.764	0.898	62.562	12047	1.172	0.853	0.93
17	SCLT1_KAN619-10_2.tif:0003-0299	1.163	67.545	0	462	32.456	21.546	0.822	78.572	15130	1.275	0.784	0.882	0.458916	1.12905	28	CEP170_KAN619-10_2.tif:0003-0299	1.163	147.183	0	571	32.456	21.546	0.822	171.213	32969	1.275	0.784	0.882
18	SCLT1_KAN619-10_2.tif:0004-0470	0.992	20.152	0	82	37.771	33.91	0.797	19.988	3849	1.822	0.549	0.905	0.168498	0.287226	29	CEP170_KAN619-10_2.tif:0004-0470	0.992	119.597	0	341	37.771	33.91	0.797	118.627	22843	1.822	0.549	0.905
19	SCLT1_KAN619-10_2.tif:0005-0547	0.982	62.365	0	400	9.011	39.434	0.779	61.212	11787	1.542	0.648	0.889	0.560992	0.879587	30	CEP170_KAN619-10_2.tif:0005-0547	0.982	111.169	0	411	9.011	39.434	0.779	109.113	21011	1.542	0.648	0.889
20	SCLT1_KAN619-10_2.tif:0006-0550	1.231	65.658	0	390	62.354	39.62	0.842	80.811	15561	1.404	0.712	0.926	0.476279	1.16122	31	CEP170_KAN619-10_2.tif:0006-0550	1.231	137.857	0	632	62.354	39.62	0.842	169.67	32672	1.404	0.712	0.926
21	SCLT1_KAN619-10_2.tif:0007-0765	0.608	44.581	0	198	6.375	55.17	0.805	27.087	5216	1.531	0.653	0.921	0.44471	0.389236	32	CEP170_KAN619-10_2.tif:0007-0765	0.608	100.248	0	229	6.375	55.17	0.805	60.91	11729	1.531	0.653	0.921
22	SCLT1_KAN619-10_2.tif:0008-0807	1.241	90.795	0	682	62.389	58.166	0.817	112.691	21700	1.441	0.694	0.907	0.64643	1.61933	33	CEP170_KAN619-10_2.tif:0008-0807	1.241	140.456	0	458	62.389	58.166	0.817	174.329	33569	1.441	0.694	0.907
23	SCLT1_KAN619-10_2.tif:0009-1031	1.054	75.049	0	553	39.654	74.331	0.829	79.118	15235	1.361	0.735	0.894	0.584635	1.13689	34	CEP170_KAN619-10_2.tif:0009-1031	1.054	128.369	0	441	39.654	74.331	0.829	135.328	26059	1.361	0.735	0.894
24	SCLT1_KAN619-10_2.tif:0010-1103	0.665	24.961	0	118	12.218	79.485	0.921	16.592	3195	1.409	0.71	0.945	0.223115	0.238422	35	CEP170_KAN619-10_2.tif:0010-1103	0.665	111.875	0	292	12.218	79.485	0.921	74.366	14320	1.409	0.71	0.945
25	SCLT1_KAN619-10_2.tif:0011-1150	1.215	73.325	0	597	64.618	82.872	0.816	89.104	17158	1.708	0.585	0.927	0.527598	1.28039	36	CEP170_KAN619-10_2.tif:0011-1150	1.215	138.979	0	511	64.618	82.872	0.816	168.886	32521	1.708	0.585	0.927
37	SCLT1_KAN619-10_3.tif:0001-0175	1.101	59.41	0	390	42.969	12.565	0.731	65.408	12595	1.48	0.675	0.865	0.604309	0.939883	44	CEP170_KAN619-10_3.tif:0001-0175	1.101	98.311	0	330	42.969	12.565	0.731	108.236	20842	1.48	0.675	0.865
38	SCLT1_KAN619-10_3.tif:0002-0231	1.278	86.175	0	688	29.939	16.66	0.851	110.09	21199	1.398	0.715	0.921	0.687141	1.58194	45	CEP170_KAN619-10_3.tif:0002-0231	1.278	125.411	0	477	29.939	16.66	0.851	160.214	30851	1.398	0.715	0.921
39	SCLT1_KAN619-10_3.tif:0003-0460	0.644	13.766	0	81	67.037	33.127	0.928	8.865	1707	1.011	0.989	0.947	0.108216	0.127382	46	CEP170_KAN619-10_3.tif:0003-0460	0.644	127.21	0	360	67.037	33.127	0.928	81.917	15774	1.011	0.989	0.947
40	SCLT1_KAN619-10_3.tif:0004-0689	1.226	58.335	0	423	21.306	49.611	0.77	71.494	13767	1.077	0.928	0.897	0.55454	1.02734	47	CEP170_KAN619-10_3.tif:0004-0689	1.226	105.195	0	376	21.306	49.611	0.77	128.925	24826	1.077	0.928	0.897
41	SCLT1_KAN619-10_3.tif:0005-0786	1.506	70.4	0	572	59.299	56.584	0.726	106.023	20416	1.98	0.505	0.879	0.649984	1.52351	48	CEP170_KAN619-10_3.tif:0005-0786	1.506	108.31	0	504	59.299	56.584	0.726	163.117	31410	1.98	0.505	0.879
42	SCLT1_KAN619-10_3.tif:0006-0990	1.329	57.391	0	518	26.841	71.428	0.776	76.298	14692	1.865	0.536	0.936	0.539532	1.09637	49	CEP170_KAN619-10_3.tif:0006-0990	1.329	106.371	0	521	26.841	71.428	0.776	141.415	27231	1.865	0.536	0.936
43	SCLT1_KAN619-10_3.tif:0007-1103	1.262	62.724	0	393	57.457	79.497	0.764	79.154	15242	2.055	0.487	0.933	0.838302	1.13741	50	CEP170_KAN619-10_3.tif:0007-1103	1.262	74.823	0	426	57.457	79.497	0.764	94.422	18182	2.055	0.487	0.933
51	SCLT1_KAN619-10_4.tif:0001-0154	0.826	5.472	0	25	76.568	11.122	0.878	4.518	870	1.651	0.606	0.914	0.0466438	0.0649224	64	CEP170_KAN619-10_4.tif:0001-0154	0.826	117.308	0	366	76.568	11.122	0.878	96.863	18652	1.651	0.606	0.914
52	SCLT1_KAN619-10_4.tif:0002-0154	0.592	93.246	0	371	89.719	11.134	0.816	55.203	10630	1.723	0.58	0.95	1.02133	0.793248	65	CEP170_KAN619-10_4.tif:0002-0154	0.592	91.298	0	208	89.719	11.134	0.816	54.05	10408	1.723	0.58	0.95
53	SCLT1_KAN619-10_4.tif:0003-0206	1.096	70.502	0	382	47.098	14.858	0.81	77.253	14876	1.148	0.871	0.911	0.57423	1.1101	66	CEP170_KAN619-10_4.tif:0003-0206	1.096	122.777	0	404	47.098	14.858	0.81	134.534	25906	1.148	0.871	0.911
54	SCLT1_KAN619-10_4.tif:0004-0274	0.878	44.982	0	152	30.646	19.755	0.92	39.478	7602	1.104	0.906	0.936	0.33433	0.567288	67	CEP170_KAN619-10_4.tif:0004-0274	0.878	134.544	0	409	30.646	19.755	0.92	118.082	22738	1.104	0.906	0.936
55	SCLT1_KAN619-10_4.tif:0005-0296	0.727	66.257	0	279	11.17	21.377	0.903	48.172	9276	1.077	0.928	0.952	0.432085	0.692207	68	CEP170_KAN619-10_4.tif:0005-0296	0.727	153.343	0	520	11.17	21.377	0.903	111.486	21468	1.077	0.928	0.952
56	SCLT1_KAN619-10_4.tif:0006-0431	0.597	98.983	0	469	1.547	31.113	0.861	59.114	11383	1.408	0.71	0.916	1.1383	0.849439	69	CEP170_KAN619-10_4.tif:0006-0431	0.597	86.957	0	303	1.547	31.113	0.861	51.931	10000	1.408	0.71	0.916
57	SCLT1_KAN619-10_4.tif:0007-0440	0.935	98.528	0	533	73.769	31.774	0.789	92.1	17735	1.315	0.761	0.911	0.987417	1.32345	70	CEP170_KAN619-10_4.tif:0007-0440	0.935	99.783	0	324	73.769	31.774	0.789	93.274	17961	1.315	0.761	0.911
58	SCLT1_KAN619-10_4.tif:0008-0572	0.696	30.545	0	105	46.485	41.233	0.937	21.256	4093	1.113	0.898	0.944	0.218643	0.305434	71	CEP170_KAN619-10_4.tif:0008-0572	0.696	139.701	0	456	46.485	41.233	0.937	97.216	18720	1.113	0.898	0.944
59	SCLT1_KAN619-10_4.tif:0009-0779	0.727	45.293	0	283	22.601	56.132	0.893	32.93	6341	1.447	0.691	0.94	0.462982	0.473187	72	CEP170_KAN619-10_4.tif:0009-0779	0.727	97.829	0	242	22.601	56.132	0.893	71.125	13696	1.447	0.691	0.94
60	SCLT1_KAN619-10_4.tif:0010-0967	0.717	56.71	0	268	44.207	69.679	0.848	40.642	7826	1.206	0.829	0.893	0.515547	0.584003	73	CEP170_KAN619-10_4.tif:0010-0967	0.717	110	0	292	44.207	69.679	0.848	78.832	15180	1.206	0.829	0.893
61	SCLT1_KAN619-10_4.tif:0011-1019	0.893	92.273	0	537	68.519	73.429	0.872	82.42	15871	1.2	0.834	0.917	1.05673	1.18435	74	CEP170_KAN619-10_4.tif:0011-1019	0.893	87.32	0	276	68.519	73.429	0.872	77.996	15019	1.2	0.834	0.917
62	SCLT1_KAN619-10_4.tif:0012-1083	0.831	73.513	0	379	12.52	78.088	0.838	61.082	11762	1.483	0.674	0.933	0.783559	0.877721	75	CEP170_KAN619-10_4.tif:0012-1083	0.831	93.819	0	294	12.52	78.088	0.838	77.954	15011	1.483	0.674	0.933
63	SCLT1_KAN619-10_4.tif:0013-1230	0.685	37.705	0	155	3.731	88.67	0.842	25.846	4977	1.345	0.744	0.91	0.305581	0.371401	76	CEP170_KAN619-10_4.tif:0013-1230	0.685	123.386	0	331	3.731	88.67	0.842	84.581	16287	1.345	0.744	0.91
77	SCLT1_KAN619-10_5.tif:0001-0022	0.831	61.888	0	338	90.89	1.655	0.838	51.423	9902	1.662	0.602	0.955	0.53649	0.738922	88	CEP170_KAN619-10_5.tif:0001-0022	0.831	115.356	0	302	90.89	1.655	0.838	95.85	18457	1.662	0.602	0.955
78	SCLT1_KAN619-10_5.tif:0002-0028	0.784	77.04	0	396	68.847	2.036	0.783	60.412	11633	1.648	0.607	0.873	0.891964	0.868095	89	CEP170_KAN619-10_5.tif:0002-0028	0.784	86.371	0	289	68.847	2.036	0.783	67.729	13042	1.648	0.607	0.873
79	SCLT1_KAN619-10_5.tif:0003-0342	0.826	32.239	0	168	45.674	24.655	0.919	26.62	5126	1.178	0.849	0.924	0.235505	0.38252	90	CEP170_KAN619-10_5.tif:0003-0342	0.826	136.893	0	404	45.674	24.655	0.919	113.034	21766	1.178	0.849	0.924
80	SCLT1_KAN619-10_5.tif:0004-0466	0.893	90.703	0	481	34.22	33.6	0.824	81.018	15601	1.528	0.654	0.903	0.826587	1.1642	91	CEP170_KAN619-10_5.tif:0004-0466	0.893	109.733	0	338	34.22	33.6	0.824	98.015	18874	1.528	0.654	0.903
81	SCLT1_KAN619-10_5.tif:0005-0473	1.106	89.061	0	458	82.116	34.13	0.828	98.514	18970	1.361	0.735	0.901	0.580851	1.41561	92	CEP170_KAN619-10_5.tif:0005-0473	1.106	153.329	0	519	82.116	34.13	0.828	169.603	32659	1.361	0.735	0.901
82	SCLT1_KAN619-10_5.tif:0006-0558	0.789	91.099	0	278	67.822	40.196	0.934	71.91	13847	1.129	0.886	0.941	0.710066	1.03331	93	CEP170_KAN619-10_5.tif:0006-0558	0.789	128.296	0	355	67.822	40.196	0.934	101.272	19501	1.129	0.886	0.941
83	SCLT1_KAN619-10_5.tif:0007-0776	0.737	58.197	0	256	21.137	55.927	0.92	42.916	8264	1.398	0.715	0.925	0.502768	0.616688	94	CEP170_KAN619-10_5.tif:0007-0776	0.737	115.754	0	341	21.137	55.927	0.92	85.36	16437	1.398	0.715	0.925
84	SCLT1_KAN619-10_5.tif:0008-0822	0.971	96.781	0	463	46.379	59.277	0.868	93.986	18098	1.169	0.856	0.908	1.05954	1.35054	95	CEP170_KAN619-10_5.tif:0008-0822	0.971	91.342	0	290	46.379	59.277	0.868	88.704	17081	1.169	0.856	0.908
85	SCLT1_KAN619-10_5.tif:0009-0845	0.935	109.039	0	610	70.981	60.945	0.806	101.926	19627	1.282	0.78	0.891	1.35827	1.46463	96	CEP170_KAN619-10_5.tif:0009-0845	0.935	80.278	0	277	70.981	60.945	0.806	75.041	14450	1.282	0.78	0.891
86	SCLT1_KAN619-10_5.tif:0010-1243	0.602	108.621	0	382	71.337	89.603	0.92	65.434	12600	1.305	0.766	0.935	0.912977	0.940256	97	CEP170_KAN619-10_5.tif:0010-1243	0.602	118.974	0	344	71.337	89.603	0.92	71.671	13801	1.305	0.766	0.935
87	SCLT1_KAN619-10_5.tif:0011-1258	0.841	87.654	0	408	15.112	90.627	0.742	73.743	14200	1.347	0.742	0.855	0.941208	1.05965	98	CEP170_KAN619-10_5.tif:0011-1258	0.841	93.13	0	275	15.112	90.627	0.742	78.349	15087	1.347	0.742	0.855
99	SCLT1_KAN619-10_6.tif:0001-0026	1.137	95.311	0	723	34.054	1.915	0.785	108.397	20873	1.513	0.661	0.903	1.0544	1.55762	107	CEP170_KAN619-10_6.tif:0001-0026	1.137	90.393	0	313	34.054	1.915	0.785	102.804	19796	1.513	0.661	0.903
100	SCLT1_KAN619-10_6.tif:0002-0168	0.706	38.735	0	205	48.1	12.149	0.905	27.357	5268	1.106	0.904	0.889	0.306439	0.393116	108	CEP170_KAN619-10_6.tif:0002-0168	0.706	126.404	0	390	48.1	12.149	0.905	89.275	17191	1.106	0.904	0.889
101	SCLT1_KAN619-10_6.tif:0003-0279	0.68	74.183	0	328	64.527	20.118	0.868	50.467	9718	1.448	0.691	0.936	0.661268	0.725191	109	CEP170_KAN619-10_6.tif:0003-0279	0.68	112.183	0	335	64.527	20.118	0.868	76.318	14696	1.448	0.691	0.936
102	SCLT1_KAN619-10_6.tif:0004-0616	1.023	57.873	0	423	26.824	44.348	0.75	59.207	11401	1.365	0.733	0.874	0.461916	0.850782	110	CEP170_KAN619-10_6.tif:0004-0616	1.023	125.289	0	459	26.824	44.348	0.75	128.177	24682	1.365	0.733	0.874
103	SCLT1_KAN619-10_6.tif:0005-0640	1.153	135.108	0	886	81.62	46.1	0.828	155.763	29994	1.21	0.826	0.919	1.18128	2.23826	111	CEP170_KAN619-10_6.tif:0005-0640	1.153	114.374	0	674	81.62	46.1	0.828	131.859	25391	1.21	0.826	0.919
104	SCLT1_KAN619-10_6.tif:0006-0754	0.893	131.145	0	884	72.029	54.348	0.936	117.142	22557	1.174	0.851	0.927	1.25101	1.68328	112	CEP170_KAN619-10_6.tif:0006-0754	0.893	104.831	0	396	72.029	54.348	0.936	93.638	18031	1.174	0.851	0.927
105	SCLT1_KAN619-10_6.tif:0007-1031	1.127	62.092	0	376	27.174	74.244	0.816	69.972	13474	1.11	0.901	0.923	0.554508	1.00548	113	CEP170_KAN619-10_6.tif:0007-1031	1.127	111.977	0	421	27.174	74.244	0.816	126.188	24299	1.11	0.901	0.923
106	SCLT1_KAN619-10_6.tif:0008-1059	0.945	84.06	0	441	54.777	76.323	0.844	79.45	15299	1.463	0.684	0.91	0.708156	1.14166	114	CEP170_KAN619-10_6.tif:0008-1059	0.945	118.703	0	375	54.777	76.323	0.844	112.193	21604	1.463	0.684	0.91
									AVERAGE	12463.5					0.930073
									SEM	792.546
										0.409796
115	SCLT1_KAN619-11_1.tif:0001-0241	1.392	75.063	0	389	54.23	17.401	0.664	104.471	20117	2.437	0.41	0.898	1.20267	1.5012	121	CEP170_KAN619-11_1.tif:0001-0241	1.392	62.414	0	236	54.23	17.401	0.664	86.866	16727	2.437	0.41	0.898
116	SCLT1_KAN619-11_1.tif:0002-0273	0.665	15.438	0	196	3.486	19.671	0.848	10.262	1976	1.536	0.651	0.938	0.131681	0.147456	122	CEP170_KAN619-11_1.tif:0002-0273	0.665	117.234	0	329	3.486	19.671	0.848	77.928	15006	1.536	0.651	0.938
117	SCLT1_KAN619-11_1.tif:0003-0349	1.677	84.87	0	714	81.031	25.17	0.729	142.36	27413	2.177	0.459	0.922	1.08078	2.04565	123	CEP170_KAN619-11_1.tif:0003-0349	1.677	78.526	0	451	81.031	25.17	0.729	131.719	25364	2.177	0.459	0.922
118	SCLT1_KAN619-11_1.tif:0004-0530	0.826	126.119	0	805	49.89	38.178	0.893	104.138	20053	1.198	0.835	0.981	1.73154	1.49642	124	CEP170_KAN619-11_1.tif:0004-0530	0.826	72.836	0	242	49.89	38.178	0.893	60.142	11581	1.198	0.835	0.981
119	SCLT1_KAN619-11_1.tif:0005-0559	1.252	77.365	0	603	13.969	40.312	0.717	96.826	18645	2.075	0.482	0.931	1.38872	1.39135	125	CEP170_KAN619-11_1.tif:0005-0559	1.252	55.71	0	289	13.969	40.312	0.717	69.723	13426	2.075	0.482	0.931
120	SCLT1_KAN619-11_1.tif:0006-0762	1.423	76.142	0	541	55.611	54.916	0.738	108.345	20863	1.865	0.536	0.904	0.670944	1.55687	126	CEP170_KAN619-11_1.tif:0006-0762	1.423	113.485	0	515	55.611	54.916	0.738	161.481	31095	1.865	0.536	0.904
127	SCLT1_KAN619-11_2.tif:0001-0225	1.013	105.903	0	590	71.094	16.209	0.925	107.244	20651	1.053	0.949	0.929	0.827364	1.54105	136	CEP170_KAN619-11_2.tif:0001-0225	1.013	128	0	428	71.094	16.209	0.925	129.621	24960	1.053	0.949	0.929
128	SCLT1_KAN619-11_2.tif:0002-0315	1.246	70.354	0	440	14.857	22.66	0.763	87.686	16885	2.082	0.48	0.909	0.507011	1.26002	137	CEP170_KAN619-11_2.tif:0002-0315	1.246	138.762	0	466	14.857	22.66	0.763	172.947	33303	2.082	0.48	0.909
129	SCLT1_KAN619-11_2.tif:0003-0422	0.883	104.376	0	513	44.533	30.397	0.853	92.147	17744	1.321	0.757	0.904	0.951064	1.32412	138	CEP170_KAN619-11_2.tif:0003-0422	0.883	109.747	0	296	44.533	30.397	0.853	96.889	18657	1.321	0.757	0.904
130	SCLT1_KAN619-11_2.tif:0004-0464	1.018	105.194	0	553	76.564	33.425	0.87	107.072	20618	1.282	0.78	0.922	1.25559	1.53859	139	CEP170_KAN619-11_2.tif:0004-0464	1.018	83.781	0	319	76.564	33.425	0.87	85.277	16421	1.282	0.78	0.922
131	SCLT1_KAN619-11_2.tif:0005-0871	0.997	148.74	0	862	51.792	62.748	0.899	148.306	28558	1.144	0.874	0.948	1.35584	2.1311	140	CEP170_KAN619-11_2.tif:0005-0871	0.997	109.703	0	417	51.792	62.748	0.899	109.383	21063	1.144	0.874	0.948
132	SCLT1_KAN619-11_2.tif:0006-0905	0.898	111.081	0	550	19.656	65.28	0.848	99.797	19217	1.131	0.884	0.899	1.12387	1.43404	141	CEP170_KAN619-11_2.tif:0006-0905	0.898	98.838	0	353	19.656	65.28	0.848	88.798	17099	1.131	0.884	0.899
133	SCLT1_KAN619-11_2.tif:0007-1007	0.898	156.434	0	856	75.071	72.626	0.919	140.542	27063	1.13	0.885	0.935	1.58755	2.01954	142	CEP170_KAN619-11_2.tif:0007-1007	0.898	98.538	0	310	75.071	72.626	0.919	88.528	17047	1.13	0.885	0.935
134	SCLT1_KAN619-11_2.tif:0008-1082	0.914	143.881	0	816	61.014	78.016	0.913	131.506	25323	1.117	0.895	0.936	1.44653	1.88969	143	CEP170_KAN619-11_2.tif:0008-1082	0.914	99.466	0	335	61.014	78.016	0.913	90.911	17506	1.117	0.895	0.936
135	SCLT1_KAN619-11_2.tif:0009-1143	0.95	123.71	0	585	68.899	82.437	0.906	117.568	22639	1.142	0.876	0.951	0.89631	1.6894	144	CEP170_KAN619-11_2.tif:0009-1143	0.95	138.022	0	499	68.899	82.437	0.906	131.169	25258	1.142	0.876	0.951
145	SCLT1_KAN619-11_3.tif:0001-0151	0.795	51.072	0	166	80.378	10.942	0.863	40.579	7814	1.166	0.858	0.911	0.510519	0.583108	158	CEP170_KAN619-11_3.tif:0001-0151	0.795	100.039	0	246	80.378	10.942	0.863	79.486	15306	1.166	0.858	0.911
146	SCLT1_KAN619-11_3.tif:0002-0175	1.215	98.855	0	684	38.628	12.58	0.891	120.128	23132	1.214	0.824	0.929	0.689499	1.72619	159	CEP170_KAN619-11_3.tif:0002-0175	1.215	143.372	0	547	38.628	12.58	0.891	174.225	33549	1.214	0.824	0.929
147	SCLT1_KAN619-11_3.tif:0003-0218	1.148	125.846	0	775	20.215	15.715	0.942	144.432	27812	1.029	0.972	0.944	0.640962	2.07543	160	CEP170_KAN619-11_3.tif:0003-0218	1.148	196.339	0	732	20.215	15.715	0.942	225.336	43391	1.029	0.972	0.944
148	SCLT1_KAN619-11_3.tif:0004-0300	1.215	89.705	0	706	12.205	21.568	0.816	109.009	20991	1.324	0.755	0.914	0.571308	1.56642	161	CEP170_KAN619-11_3.tif:0004-0300	1.215	157.017	0	632	12.205	21.568	0.816	190.807	36742	1.324	0.755	0.914
149	SCLT1_KAN619-11_3.tif:0005-0345	1.355	149.946	0	1131	77.667	24.842	0.859	203.239	39136	1.237	0.808	0.942	1.36791	2.92046	162	CEP170_KAN619-11_3.tif:0005-0345	1.355	109.617	0	586	77.667	24.842	0.859	148.576	28610	1.237	0.808	0.942
150	SCLT1_KAN619-11_3.tif:0006-0446	0.592	7.904	0	53	66.089	32.106	0.916	4.679	901	1.209	0.827	0.942	0.0682162	0.0672357	163	CEP170_KAN619-11_3.tif:0006-0446	0.592	115.86	0	282	66.089	32.106	0.916	68.591	13208	1.209	0.827	0.942
151	SCLT1_KAN619-11_3.tif:0007-0461	0.883	61.506	0	314	53.196	33.253	0.861	54.3	10456	1.097	0.912	0.919	0.547406	0.780263	164	CEP170_KAN619-11_3.tif:0007-0461	0.883	112.359	0	382	53.196	33.253	0.861	99.194	19101	1.097	0.912	0.919
152	SCLT1_KAN619-11_3.tif:0008-0536	0.732	18.582	0	90	89.392	38.555	0.721	13.606	2620	1.624	0.616	0.857	0.175427	0.195513	165	CEP170_KAN619-11_3.tif:0008-0536	0.732	105.922	0	216	89.392	38.555	0.721	77.56	14935	1.624	0.616	0.857
153	SCLT1_KAN619-11_3.tif:0009-0700	1.028	122.758	0	730	18.766	50.459	0.841	126.225	24306	1.252	0.799	0.943	0.953737	1.8138	166	CEP170_KAN619-11_3.tif:0009-0700	1.028	128.712	0	505	18.766	50.459	0.841	132.347	25485	1.252	0.799	0.943
154	SCLT1_KAN619-11_3.tif:0010-0762	1.355	140.931	0	1401	74.261	54.979	0.845	191.02	36783	1.371	0.729	0.908	0.951941	2.74488	167	CEP170_KAN619-11_3.tif:0010-0762	1.355	148.046	0	610	74.261	54.979	0.845	200.663	38640	1.371	0.729	0.908
155	SCLT1_KAN619-11_3.tif:0011-0931	0.722	12.719	0	74	10.671	67.092	0.935	9.181	1768	1.333	0.75	0.946	0.106276	0.131934	168	CEP170_KAN619-11_3.tif:0011-0931	0.722	119.683	0	347	10.671	67.092	0.935	86.393	16636	1.333	0.75	0.946
156	SCLT1_KAN619-11_3.tif:0012-1102	0.987	97.189	0	594	66.705	79.427	0.862	95.897	18466	1.383	0.723	0.92	0.893934	1.378	169	CEP170_KAN619-11_3.tif:0012-1102	0.987	108.721	0	415	66.705	79.427	0.862	107.275	20657	1.383	0.723	0.92
157	SCLT1_KAN619-11_3.tif:0013-1237	0.878	119.373	0	612	44.871	89.162	0.856	104.767	20174	1.132	0.883	0.909	1.75228	1.50545	170	CEP170_KAN619-11_3.tif:0013-1237	0.878	68.124	0	240	44.871	89.162	0.856	59.789	11513	1.132	0.883	0.909
171	SCLT1_KAN619-11_4.tif:0001-0079	0.618	77.445	0	340	9.608	5.708	0.661	47.86	9216	2.052	0.487	0.821	1.15373	0.68773	184	CEP170_KAN619-11_4.tif:0001-0079	0.618	67.126	0	212	9.608	5.708	0.661	41.483	7988	2.052	0.487	0.821
172	SCLT1_KAN619-11_4.tif:0002-0108	1.496	140.149	0	1089	26.769	7.778	0.801	209.611	40363	1.545	0.647	0.923	1.00817	3.01203	185	CEP170_KAN619-11_4.tif:0002-0108	1.496	139.014	0	756	26.769	7.778	0.801	207.913	40036	1.545	0.647	0.923
173	SCLT1_KAN619-11_4.tif:0003-0211	0.956	82.071	0	464	91.211	15.264	0.665	78.422	15101	2.071	0.483	0.84	1.45608	1.12689	186	CEP170_KAN619-11_4.tif:0003-0211	0.956	56.364	0	231	91.211	15.264	0.665	53.858	10371	2.071	0.483	0.84
174	SCLT1_KAN619-11_4.tif:0004-0225	1.059	68.799	0	413	57.677	16.232	0.777	72.886	14035	1.491	0.671	0.887	0.690393	1.04734	187	CEP170_KAN619-11_4.tif:0004-0225	1.059	99.652	0	364	57.677	16.232	0.777	105.571	20329	1.491	0.671	0.887
175	SCLT1_KAN619-11_4.tif:0005-0341	0.68	107.084	0	357	27.505	24.6	0.814	72.849	14028	1.61	0.621	0.916	1.4073	1.04682	188	CEP170_KAN619-11_4.tif:0005-0341	0.68	76.092	0	226	27.505	24.6	0.814	51.765	9968	1.61	0.621	0.916
176	SCLT1_KAN619-11_4.tif:0006-0396	0.93	117.782	0	677	81.276	28.628	0.831	109.487	21083	1.447	0.691	0.918	1.18898	1.57329	189	CEP170_KAN619-11_4.tif:0006-0396	0.93	99.061	0	345	81.276	28.628	0.831	92.085	17732	1.447	0.691	0.918
177	SCLT1_KAN619-11_4.tif:0007-0497	0.717	65.587	0	327	65.961	35.795	0.806	47.003	9051	1.475	0.678	0.887	0.687609	0.675417	190	CEP170_KAN619-11_4.tif:0007-0497	0.717	95.384	0	348	65.961	35.795	0.806	68.357	13163	1.475	0.678	0.887
178	SCLT1_KAN619-11_4.tif:0008-0807	1.117	74.67	0	576	36.849	58.101	0.802	83.371	16054	1.658	0.603	0.925	0.568948	1.19801	191	CEP170_KAN619-11_4.tif:0008-0807	1.117	131.242	0	427	36.849	58.101	0.802	146.535	28217	1.658	0.603	0.925
179	SCLT1_KAN619-11_4.tif:0009-0886	0.618	43.916	0	246	15.933	63.892	0.956	27.139	5226	1.193	0.838	0.96	0.364842	0.389982	192	CEP170_KAN619-11_4.tif:0009-0886	0.618	120.37	0	269	15.933	63.892	0.956	74.387	14324	1.193	0.838	0.96
180	SCLT1_KAN619-11_4.tif:0010-0992	1.179	61.022	0	548	88.333	71.581	0.908	71.935	13852	1.2	0.834	0.954	0.468987	1.03368	193	CEP170_KAN619-11_4.tif:0010-0992	1.179	130.115	0	458	88.333	71.581	0.908	153.385	29536	1.2	0.834	0.954
181	SCLT1_KAN619-11_4.tif:0011-0998	1.049	61.545	0	403	56.021	71.922	0.822	64.561	12432	1.196	0.836	0.92	0.447371	0.927719	194	CEP170_KAN619-11_4.tif:0011-0998	1.049	137.569	0	566	56.021	71.922	0.822	144.312	27789	1.196	0.836	0.92
182	SCLT1_KAN619-11_4.tif:0012-1143	1.137	75.288	0	436	21.669	82.427	0.807	85.625	16488	1.677	0.596	0.926	0.861982	1.23039	195	CEP170_KAN619-11_4.tif:0012-1143	1.137	87.342	0	438	21.669	82.427	0.807	99.335	19128	1.677	0.596	0.926
183	SCLT1_KAN619-11_4.tif:0013-1198	0.795	139.673	0	772	71.093	86.386	0.907	110.978	21370	1.202	0.832	0.916	1.05776	1.5947	196	CEP170_KAN619-11_4.tif:0013-1198	0.795	132.046	0	414	71.093	86.386	0.907	104.917	20203	1.202	0.832	0.916
197	SCLT1_KAN619-11_5.tif:0001-0267	0.649	10.344	0	44	53.075	19.253	0.884	6.715	1293	1.288	0.777	0.94	0.0914104	0.0964881	206	CEP170_KAN619-11_5.tif:0001-0267	0.649	113.16	0	334	53.075	19.253	0.884	73.457	14145	1.288	0.777	0.94
198	SCLT1_KAN619-11_5.tif:0002-0332	1.106	81.258	0	559	21.274	23.947	0.835	89.883	17308	1.699	0.589	0.93	0.547982	1.29158	207	CEP170_KAN619-11_5.tif:0002-0332	1.106	148.286	0	538	21.274	23.947	0.835	164.026	31585	1.699	0.589	0.93
199	SCLT1_KAN619-11_5.tif:0003-0390	1.366	122.924	0	894	85.473	28.181	0.777	167.889	32329	1.712	0.584	0.916	1.56081	2.4125	208	CEP170_KAN619-11_5.tif:0003-0390	1.366	78.757	0	454	85.473	28.181	0.777	107.566	20713	1.712	0.584	0.916
200	SCLT1_KAN619-11_5.tif:0004-0426	0.982	117.407	0	799	30.309	30.668	0.906	115.236	22190	1.134	0.882	0.931	0.799668	1.65589	209	CEP170_KAN619-11_5.tif:0004-0426	0.982	146.82	0	500	30.309	30.668	0.906	144.105	27749	1.134	0.882	0.931
201	SCLT1_KAN619-11_5.tif:0005-0555	0.872	79.411	0	463	56.527	39.939	0.805	69.282	13341	1.248	0.801	0.88	0.679692	0.995552	210	CEP170_KAN619-11_5.tif:0005-0555	0.872	116.833	0	323	56.527	39.939	0.805	101.931	19628	1.248	0.801	0.88
202	SCLT1_KAN619-11_5.tif:0006-0712	1.174	84.226	0	568	6.824	51.337	0.923	98.852	19035	1.224	0.817	0.95	0.599226	1.42046	211	CEP170_KAN619-11_5.tif:0006-0712	1.174	140.558	0	544	6.824	51.337	0.923	164.966	31766	1.224	0.817	0.95
203	SCLT1_KAN619-11_5.tif:0007-0792	0.8	63.519	0	304	65.598	57.057	0.818	50.799	9782	1.158	0.863	0.885	0.607729	0.729967	212	CEP170_KAN619-11_5.tif:0007-0792	0.8	104.519	0	389	65.598	57.057	0.818	83.589	16096	1.158	0.863	0.885
204	SCLT1_KAN619-11_5.tif:0008-1002	0.737	52.106	0	215	12.735	72.25	0.906	38.424	7399	1.289	0.776	0.94	0.423599	0.552139	213	CEP170_KAN619-11_5.tif:0008-1002	0.737	123.007	0	271	12.735	72.25	0.906	90.709	17467	1.289	0.776	0.94
205	SCLT1_KAN619-11_5.tif:0009-1069	0.992	160.079	0	937	35.475	77.053	0.924	158.78	30575	1.167	0.857	0.962	1.62858	2.28161	214	CEP170_KAN619-11_5.tif:0009-1069	0.992	98.293	0	393	35.475	77.053	0.924	97.496	18774	1.167	0.857	0.962
215	SCLT1_KAN619-11_6.tif:0001-0259	1.148	92.385	0	476	77.55	18.685	0.786	106.028	20417	1.619	0.618	0.893	1.03314	1.52359	225	CEP170_KAN619-11_6.tif:0001-0259	1.148	89.421	0	403	77.55	18.685	0.786	102.627	19762	1.619	0.618	0.893
216	SCLT1_KAN619-11_6.tif:0002-0483	1.111	72.182	0	404	15.375	34.862	0.789	80.219	15447	1.685	0.593	0.918	0.878519	1.15271	226	CEP170_KAN619-11_6.tif:0002-0483	1.111	82.164	0	366	15.375	34.862	0.789	91.311	17583	1.685	0.593	0.918
217	SCLT1_KAN619-11_6.tif:0003-0529	0.935	71.461	0	384	34.056	38.087	0.862	66.799	12863	1.46	0.685	0.938	0.692378	0.959882	227	CEP170_KAN619-11_6.tif:0003-0529	0.935	103.211	0	390	34.056	38.087	0.862	96.478	18578	1.46	0.685	0.938
218	SCLT1_KAN619-11_6.tif:0004-0562	1.194	64.722	0	524	87.047	40.573	0.872	77.305	14886	1.175	0.851	0.96	0.457988	1.11085	228	CEP170_KAN619-11_6.tif:0004-0562	1.194	141.317	0	559	87.047	40.573	0.872	168.793	32503	1.175	0.851	0.96
219	SCLT1_KAN619-11_6.tif:0005-0561	1.174	102.407	0	766	47.099	40.441	0.833	120.19	23144	1.79	0.559	0.958	1.30183	1.72709	229	CEP170_KAN619-11_6.tif:0005-0561	1.174	78.664	0	352	47.099	40.441	0.833	92.324	17778	1.79	0.559	0.958
220	SCLT1_KAN619-11_6.tif:0006-0628	0.93	116.447	0	655	1.438	45.289	0.878	108.246	20844	1.309	0.764	0.935	1.06488	1.55545	230	CEP170_KAN619-11_6.tif:0006-0628	0.93	109.352	0	303	1.438	45.289	0.878	101.651	19574	1.309	0.764	0.935
221	SCLT1_KAN619-11_6.tif:0007-0657	0.737	209.669	0	995	10.943	47.39	0.966	154.616	29773	1.102	0.908	0.963	2.05388	2.22176	231	CEP170_KAN619-11_6.tif:0007-0657	0.737	102.085	0	281	10.943	47.39	0.966	75.28	14496	1.102	0.908	0.963
222	SCLT1_KAN619-11_6.tif:0008-0922	0.935	60.444	0	358	18.897	66.504	0.862	56.501	10880	1.348	0.742	0.94	0.460354	0.811903	232	CEP170_KAN619-11_6.tif:0008-0922	0.935	131.3	0	511	18.897	66.504	0.862	122.735	23634	1.348	0.742	0.94
223	SCLT1_KAN619-11_6.tif:0009-0993	0.597	55.948	0	245	61.934	71.569	0.981	33.413	6434	1.103	0.906	0.947	0.440233	0.480127	233	CEP170_KAN619-11_6.tif:0009-0993	0.597	127.087	0	375	61.934	71.569	0.981	75.898	14615	1.103	0.906	0.947
224	SCLT1_KAN619-11_6.tif:0010-1009	0.997	53.911	0	340	41.452	72.719	0.826	53.754	10351	1.686	0.593	0.93	0.453991	0.772428	234	CEP170_KAN619-11_6.tif:0010-1009	0.997	118.75	0	376	41.452	72.719	0.826	118.404	22800	1.686	0.593	0.93
									AVERAGE	17811.9					1.32919
									SEM	1169.08
										0.00246027
235	SCLT1_KAN619-12_1.tif:0001-0580	1.007	32.263	0	211	88.46	41.809	0.793	32.504	6259	1.678	0.596	0.9	0.245364	0.467068	237	CEP170_KAN619-12_1.tif:0001-0580	1.007	131.49	0	415	88.46	41.809	0.793	132.472	25509	1.678	0.596	0.9
236	SCLT1_KAN619-12_1.tif:0002-0692	0.556	56.785	0	169	37.508	49.908	0.924	31.554	6076	1.24	0.806	0.955	0.494547	0.453412	238	CEP170_KAN619-12_1.tif:0002-0692	0.556	114.822	0	301	37.508	49.908	0.924	63.803	12286	1.24	0.806	0.955
239	SCLT1_KAN619-12_2.tif:0001-0186	0.909	87.229	0	479	56.607	13.439	0.838	79.273	15265	1.484	0.674	0.907	0.910637	1.13913	248	CEP170_KAN619-12_2.tif:0001-0186	0.909	95.789	0	301	56.607	13.439	0.838	87.053	16763	1.484	0.674	0.907
240	SCLT1_KAN619-12_2.tif:0002-0317	1.132	48.317	0	363	74.232	22.853	0.806	54.699	10533	1.365	0.732	0.876	0.353433	0.786009	249	CEP170_KAN619-12_2.tif:0002-0317	1.132	136.706	0	653	74.232	22.853	0.806	154.766	29802	1.365	0.732	0.876
241	SCLT1_KAN619-12_2.tif:0003-0699	0.634	28.434	0	100	44.355	50.359	0.924	18.015	3469	1.289	0.776	0.976	0.201534	0.258869	250	CEP170_KAN619-12_2.tif:0003-0699	0.634	141.09	0	541	44.355	50.359	0.924	89.39	17213	1.289	0.776	0.976
242	SCLT1_KAN619-12_2.tif:0004-0713	0.701	29.415	0	88	50.716	51.422	0.861	20.622	3971	1.574	0.635	0.934	0.235444	0.29633	251	CEP170_KAN619-12_2.tif:0004-0713	0.701	124.933	0	397	50.716	51.422	0.861	87.588	16866	1.574	0.635	0.934
243	SCLT1_KAN619-12_2.tif:0005-0785	0.857	71.552	0	216	1.522	56.614	0.791	61.31	11806	1.558	0.642	0.897	0.60743	0.881005	252	CEP170_KAN619-12_2.tif:0005-0785	0.857	117.794	0	342	1.522	56.614	0.791	100.934	19436	1.558	0.642	0.897
244	SCLT1_KAN619-12_2.tif:0006-0837	0.997	60.625	0	399	22.977	60.29	0.819	60.448	11640	1.712	0.584	0.895	0.556405	0.868617	253	CEP170_KAN619-12_2.tif:0006-0837	0.997	108.958	0	408	22.977	60.29	0.819	108.641	20920	1.712	0.584	0.895
245	SCLT1_KAN619-12_2.tif:0007-1016	0.836	61.665	0	239	50.059	73.219	0.917	51.558	9928	1.126	0.888	0.95	0.379206	0.740862	254	CEP170_KAN619-12_2.tif:0007-1016	0.836	162.615	0	607	50.059	73.219	0.917	135.962	26181	1.126	0.888	0.95
246	SCLT1_KAN619-12_2.tif:0008-1137	0.81	80.891	0	403	73.333	82.015	0.837	65.532	12619	1.194	0.838	0.904	0.819522	0.941674	255	CEP170_KAN619-12_2.tif:0008-1137	0.81	98.705	0	290	73.333	82.015	0.837	79.964	15398	1.194	0.838	0.904
247	SCLT1_KAN619-12_2.tif:0009-1163	0.727	72.8	0	448	14.963	83.817	0.893	52.929	10192	1.243	0.805	0.927	0.783638	0.760562	256	CEP170_KAN619-12_2.tif:0009-1163	0.727	92.9	0	256	14.963	83.817	0.893	67.542	13006	1.243	0.805	0.927
257	SCLT1_KAN619-12_3.tif:0001-0204	0.685	78.28	0	307	67.101	14.703	0.861	53.661	10333	1.44	0.694	0.971	1.16297	0.771084	267	CEP170_KAN619-12_3.tif:0001-0204	0.685	67.311	0	219	67.101	14.703	0.861	46.141	8885	1.44	0.694	0.971
258	SCLT1_KAN619-12_3.tif:0002-0417	0.519	72.15	0	284	10.402	30.068	0.78	37.469	7215	1.784	0.56	0.905	0.705554	0.538408	268	CEP170_KAN619-12_3.tif:0002-0417	0.519	102.26	4	209	10.402	30.068	0.78	53.105	10226	1.784	0.56	0.905
259	SCLT1_KAN619-12_3.tif:0003-0471	0.888	36.789	0	140	61.147	33.976	0.964	32.67	6291	1.142	0.876	0.955	0.225727	0.469456	269	CEP170_KAN619-12_3.tif:0003-0471	0.888	162.982	0	528	61.147	33.976	0.964	144.733	27870	1.142	0.876	0.955
260	SCLT1_KAN619-12_3.tif:0004-0817	0.976	65.989	0	345	79.819	58.929	0.872	64.426	12406	1.331	0.751	0.917	0.541392	0.925779	270	CEP170_KAN619-12_3.tif:0004-0817	0.976	121.888	0	484	79.819	58.929	0.872	119.001	22915	1.331	0.751	0.917
261	SCLT1_KAN619-12_3.tif:0005-0820	0.821	53.639	0	255	10.581	59.093	0.891	44.012	8475	1.215	0.823	0.924	0.401735	0.632434	271	CEP170_KAN619-12_3.tif:0005-0820	0.821	133.519	0	435	10.581	59.093	0.891	109.555	21096	1.215	0.823	0.924
262	SCLT1_KAN619-12_3.tif:0006-0897	0.826	102.912	0	513	70.906	64.658	0.825	84.975	16363	1.441	0.694	0.891	1.13207	1.22106	272	CEP170_KAN619-12_3.tif:0006-0897	0.826	90.906	0	235	70.906	64.658	0.825	75.062	14454	1.441	0.694	0.891
263	SCLT1_KAN619-12_3.tif:0007-1010	0.582	46.393	0	189	40.052	72.774	0.734	26.984	5196	1.893	0.528	0.848	0.46626	0.387744	273	CEP170_KAN619-12_3.tif:0007-1010	0.582	99.5	0	186	40.052	72.774	0.734	57.872	11144	1.893	0.528	0.848
264	SCLT1_KAN619-12_3.tif:0008-1074	0.841	67.494	0	318	12.346	77.399	0.861	56.782	10934	1.334	0.749	0.913	0.599978	0.815933	274	CEP170_KAN619-12_3.tif:0008-1074	0.841	112.494	0	332	12.346	77.399	0.861	94.64	18224	1.334	0.749	0.913
265	SCLT1_KAN619-12_3.tif:0009-1201	0.582	17.839	0	98	28.817	86.526	0.884	10.376	1998	1.25	0.8	0.97	0.134473	0.149098	275	CEP170_KAN619-12_3.tif:0009-1201	0.582	132.661	0	408	28.817	86.526	0.884	77.16	14858	1.25	0.8	0.97
266	SCLT1_KAN619-12_3.tif:0010-1265	0.893	69.89	0	437	72.792	91.184	0.788	62.427	12021	1.474	0.679	0.887	0.69979	0.897049	276	CEP170_KAN619-12_3.tif:0010-1265	0.893	99.872	0	354	72.792	91.184	0.788	89.208	17178	1.474	0.679	0.887
277	SCLT1_KAN619-12_4.tif:0001-0216	0.587	26.416	0	117	66.295	15.577	0.769	15.502	2985	1.736	0.576	0.869	0.27418	0.222751	286	CEP170_KAN619-12_4.tif:0001-0216	0.587	96.345	0	293	66.295	15.577	0.769	56.538	10887	1.736	0.576	0.869
278	SCLT1_KAN619-12_4.tif:0002-0282	0.665	20.648	0	178	48.059	20.335	0.921	13.725	2643	1.309	0.764	0.938	0.150942	0.19723	287	CEP170_KAN619-12_4.tif:0002-0282	0.665	136.797	0	484	48.059	20.335	0.921	90.932	17510	1.309	0.764	0.938
279	SCLT1_KAN619-12_4.tif:0003-0596	0.805	31.942	0	171	81.155	42.92	0.865	25.711	4951	1.131	0.884	0.886	0.292457	0.369461	288	CEP170_KAN619-12_4.tif:0003-0596	0.805	109.219	0	241	81.155	42.92	0.865	87.915	16929	1.131	0.884	0.886
280	SCLT1_KAN619-12_4.tif:0004-0607	0.971	26.171	0	235	41.874	43.735	0.876	25.415	4894	1.247	0.802	0.935	0.180119	0.365207	289	CEP170_KAN619-12_4.tif:0004-0607	0.971	145.299	0	486	41.874	43.735	0.876	141.103	27171	1.247	0.802	0.935
281	SCLT1_KAN619-12_4.tif:0005-0797	0.867	60.485	0	371	83.133	57.479	0.8	52.456	10101	1.27	0.787	0.868	0.572457	0.753772	290	CEP170_KAN619-12_4.tif:0005-0797	0.867	105.659	0	317	83.133	57.479	0.8	91.633	17645	1.27	0.787	0.868
282	SCLT1_KAN619-12_4.tif:0006-0847	1.2	78.965	0	527	40.748	61.018	0.775	94.728	18241	1.45	0.69	0.892	0.671217	1.36121	291	CEP170_KAN619-12_4.tif:0006-0847	1.2	117.645	0	528	40.748	61.018	0.775	141.129	27176	1.45	0.69	0.892
283	SCLT1_KAN619-12_4.tif:0007-0892	1.028	73.328	0	411	15.55	64.265	0.91	75.399	14519	1.027	0.974	0.912	0.734247	1.08346	292	CEP170_KAN619-12_4.tif:0007-0892	1.028	99.869	0	384	15.55	64.265	0.91	102.689	19774	1.027	0.974	0.912
284	SCLT1_KAN619-12_4.tif:0008-0969	0.831	77.644	0	454	1.242	69.887	0.902	64.514	12423	1.217	0.822	0.928	0.55899	0.927047	293	CEP170_KAN619-12_4.tif:0008-0969	0.831	138.9	0	480	1.242	69.887	0.902	115.412	22224	1.217	0.822	0.928
285	SCLT1_KAN619-12_4.tif:0009-1115	1.132	81.716	0	697	65.125	80.359	0.883	92.511	17814	1.11	0.901	0.905	0.569793	1.32934	294	CEP170_KAN619-12_4.tif:0009-1115	1.132	143.413	0	609	65.125	80.359	0.883	162.359	31264	1.11	0.901	0.905
295	SCLT1_KAN619-12_5.tif:0001-0124	1.516	135.575	0	1049	4.025	8.934	0.724	205.586	39588	1.36	0.735	0.859	2.35994	2.95419	306	CEP170_KAN619-12_5.tif:0001-0124	1.516	57.449	0	304	4.025	8.934	0.724	87.115	16775	1.36	0.735	0.859
296	SCLT1_KAN619-12_5.tif:0002-0202	1.033	20.03	0	160	37.166	14.543	0.813	20.7	3986	1.525	0.656	0.888	0.152533	0.297449	307	CEP170_KAN619-12_5.tif:0002-0202	1.033	131.317	0	471	37.166	14.543	0.813	135.707	26132	1.525	0.656	0.888
297	SCLT1_KAN619-12_5.tif:0003-0232	0.732	23.397	0	135	72.895	16.739	0.876	17.132	3299	1.393	0.718	0.94	0.179704	0.246183	308	CEP170_KAN619-12_5.tif:0003-0232	0.732	130.199	0	373	72.895	16.739	0.876	95.336	18358	1.393	0.718	0.94
298	SCLT1_KAN619-12_5.tif:0004-0495	1.168	67.667	0	464	73.532	35.666	0.769	79.066	15225	1.734	0.577	0.904	0.72194	1.13614	309	CEP170_KAN619-12_5.tif:0004-0495	1.168	93.729	0	373	73.532	35.666	0.769	109.518	21089	1.734	0.577	0.904
299	SCLT1_KAN619-12_5.tif:0005-0503	0.826	20.176	0	87	47.922	36.275	0.866	16.66	3208	1.425	0.702	0.909	0.156381	0.239392	310	CEP170_KAN619-12_5.tif:0005-0503	0.826	129.019	0	372	47.922	36.275	0.866	106.532	20514	1.425	0.702	0.909
300	SCLT1_KAN619-12_5.tif:0006-0554	0.914	92.403	0	439	16.989	39.897	0.843	84.456	16263	1.581	0.632	0.926	0.675177	1.2136	311	CEP170_KAN619-12_5.tif:0006-0554	0.914	136.858	0	552	16.989	39.897	0.843	125.087	24087	1.581	0.632	0.926
301	SCLT1_KAN619-12_5.tif:0007-0570	0.644	52.597	0	265	91.607	41.136	0.867	33.87	6522	1.209	0.827	0.908	0.481115	0.486694	312	CEP170_KAN619-12_5.tif:0007-0570	0.644	109.323	0	283	91.607	41.136	0.867	70.398	13556	1.209	0.827	0.908
302	SCLT1_KAN619-12_5.tif:0008-0958	0.654	11.262	0	47	68.905	69.036	0.943	7.369	1419	1.025	0.976	0.951	0.0948973	0.105891	313	CEP170_KAN619-12_5.tif:0008-0958	0.654	118.675	0	285	68.905	69.036	0.943	77.653	14953	1.025	0.976	0.951
303	SCLT1_KAN619-12_5.tif:0009-0960	0.54	10.471	0	36	21.602	69.171	0.956	5.655	1089	1.23	0.813	0.95	0.0893795	0.081265	314	CEP170_KAN619-12_5.tif:0009-0960	0.54	117.154	0	319	21.602	69.171	0.956	63.273	12184	1.23	0.813	0.95
304	SCLT1_KAN619-12_5.tif:0010-1007	0.66	16.827	0	109	58.803	72.599	0.864	11.098	2137	1.418	0.705	0.937	0.141317	0.15947	315	CEP170_KAN619-12_5.tif:0010-1007	0.66	119.071	0	276	58.803	72.599	0.864	78.531	15122	1.418	0.705	0.937
305	SCLT1_KAN619-12_5.tif:0011-1091	0.914	25	0	190	4.792	78.623	0.799	22.85	4400	1.529	0.654	0.9	0.192047	0.328343	316	CEP170_KAN619-12_5.tif:0011-1091	0.914	130.176	0	478	4.792	78.623	0.799	118.98	22911	1.529	0.654	0.9
317	SCLT1_KAN619-12_6.tif:0001-0093	0.872	60.655	0	381	42.688	6.744	0.872	52.918	10190	1.391	0.719	0.926	0.627772	0.760413	326	CEP170_KAN619-12_6.tif:0001-0093	0.872	96.619	0	300	42.688	6.744	0.872	84.295	16232	1.391	0.719	0.926
318	SCLT1_KAN619-12_6.tif:0002-0114	1.018	93.01	0	539	27.282	8.256	0.93	94.671	18230	1.227	0.815	0.951	0.679996	1.36039	327	CEP170_KAN619-12_6.tif:0002-0114	1.018	136.781	0	682	27.282	8.256	0.93	139.223	26809	1.227	0.815	0.951
319	SCLT1_KAN619-12_6.tif:0003-0291	0.893	47.372	0	275	56.573	20.967	0.863	42.314	8148	1.203	0.831	0.908	0.353094	0.608032	328	CEP170_KAN619-12_6.tif:0003-0291	0.893	134.163	0	402	56.573	20.967	0.863	119.837	23076	1.203	0.831	0.908
320	SCLT1_KAN619-12_6.tif:0004-0407	0.878	41.503	0	253	67.754	29.352	0.848	36.425	7014	1.535	0.652	0.916	0.345313	0.523409	329	CEP170_KAN619-12_6.tif:0004-0407	0.878	120.189	0	379	67.754	29.352	0.848	105.483	20312	1.535	0.652	0.916
321	SCLT1_KAN619-12_6.tif:0005-0671	0.67	60.752	0	318	0.523	48.392	0.761	40.699	7837	2.102	0.476	0.928	0.435437	0.584824	330	CEP170_KAN619-12_6.tif:0005-0671	0.67	139.519	0	379	0.523	48.392	0.761	93.466	17998	2.102	0.476	0.928
322	SCLT1_KAN619-12_6.tif:0006-0710	1.044	88.164	0	592	70.117	51.14	0.788	92.028	17721	1.639	0.61	0.889	0.920619	1.3224	331	CEP170_KAN619-12_6.tif:0006-0710	1.044	95.766	0	345	70.117	51.14	0.788	99.963	19249	1.639	0.61	0.889
323	SCLT1_KAN619-12_6.tif:0007-0878	0.722	27.669	0	180	4.072	63.274	0.972	19.973	3846	1.109	0.902	0.955	0.180929	0.287002	332	CEP170_KAN619-12_6.tif:0007-0878	0.722	152.928	0	527	4.072	63.274	0.972	110.391	21257	1.109	0.902	0.955
324	SCLT1_KAN619-12_6.tif:0008-0928	0.93	102.123	0	593	46.771	66.867	0.858	94.931	18280	1.569	0.637	0.937	0.902493	1.36412	333	CEP170_KAN619-12_6.tif:0008-0928	0.93	113.156	0	346	46.771	66.867	0.858	105.187	20255	1.569	0.637	0.937
325	SCLT1_KAN619-12_6.tif:0009-1126	0.602	61.009	0	232	13.345	81.127	0.844	36.752	7077	1.088	0.919	0.921	0.589848	0.52811	334	CEP170_KAN619-12_6.tif:0009-1126	0.602	103.431	0	256	13.345	81.127	0.844	62.307	11998	1.088	0.919	0.921
									AVERAGE	9540.8					0.711968
									SEM	947.189
										0.00250819
335	SCLT1_KAN619-13_1.tif:0001-0147	1.21	63.888	0	455	51.53	10.594	0.788	77.305	14886	1.799	0.556	0.943	0.678703	1.11085	341	CEP170_KAN619-13_1.tif:0001-0147	1.21	94.133	0	359	51.53	10.594	0.788	113.901	21933	1.799	0.556	0.943
336	SCLT1_KAN619-13_1.tif:0002-0166	0.769	15.905	0	77	74.698	11.955	0.855	12.225	2354	1.159	0.863	0.892	0.134553	0.175664	342	CEP170_KAN619-13_1.tif:0002-0166	0.769	118.209	0	427	74.698	11.955	0.855	90.854	17495	1.159	0.863	0.892
337	SCLT1_KAN619-13_1.tif:0003-0385	1.194	64.67	0	482	72.473	27.833	0.687	77.243	14874	1.445	0.692	0.82	0.77364	1.10995	343	CEP170_KAN619-13_1.tif:0003-0385	1.194	83.591	0	355	72.473	27.833	0.687	99.843	19226	1.445	0.692	0.82
338	SCLT1_KAN619-13_1.tif:0004-0563	0.81	19.423	0	103	21.387	40.584	0.889	15.735	3030	1.495	0.669	0.954	0.134273	0.226109	344	CEP170_KAN619-13_1.tif:0004-0563	0.81	144.654	0	492	21.387	40.584	0.889	117.189	22566	1.495	0.669	0.954
339	SCLT1_KAN619-13_1.tif:0005-0719	1.413	56.294	0	460	62.742	51.811	0.704	79.517	15312	1.907	0.524	0.877	0.410575	1.14263	345	CEP170_KAN619-13_1.tif:0005-0719	1.413	137.11	0	622	62.742	51.811	0.704	193.673	37294	1.907	0.524	0.877
340	SCLT1_KAN619-13_1.tif:0006-0973	0.789	34.796	0	160	69.178	70.169	0.959	27.467	5289	1.262	0.792	0.953	0.201225	0.394684	346	CEP170_KAN619-13_1.tif:0006-0973	0.789	172.921	0	684	69.178	70.169	0.959	136.497	26284	1.262	0.792	0.953
347	SCLT1_KAN619-13_2.tif:0001-0133	1.08	57.351	0	420	10.253	9.536	0.745	61.949	11929	1.587	0.63	0.881	0.558395	0.890183	357	CEP170_KAN619-13_2.tif:0001-0133	1.08	102.707	0	330	10.253	9.536	0.745	110.941	21363	1.587	0.63	0.881
348	SCLT1_KAN619-13_2.tif:0002-0218	0.997	62.948	0	401	43.816	15.721	0.871	62.764	12086	1.294	0.773	0.919	0.371066	0.901899	358	CEP170_KAN619-13_2.tif:0002-0218	0.997	169.641	0	839	43.816	15.721	0.871	169.146	32571	1.294	0.773	0.919
349	SCLT1_KAN619-13_2.tif:0003-0428	0.602	15.543	0	89	21.653	30.897	0.894	9.363	1803	1.244	0.804	0.921	0.134372	0.134546	359	CEP170_KAN619-13_2.tif:0003-0428	0.602	115.672	0	312	21.653	30.897	0.894	69.682	13418	1.244	0.804	0.921
350	SCLT1_KAN619-13_2.tif:0004-0557	0.769	111.723	0	522	40.725	40.128	0.944	85.869	16535	1.176	0.85	0.958	0.802358	1.2339	360	CEP170_KAN619-13_2.tif:0004-0557	0.769	139.243	0	409	40.725	40.128	0.944	107.02	20608	1.176	0.85	0.958
351	SCLT1_KAN619-13_2.tif:0005-0563	0.878	23.036	0	234	63.617	40.602	0.848	20.217	3893	1.067	0.937	0.899	0.201543	0.290509	361	CEP170_KAN619-13_2.tif:0005-0563	0.878	114.296	0	306	63.617	40.602	0.848	100.311	19316	1.067	0.937	0.899
352	SCLT1_KAN619-13_2.tif:0006-0945	1.423	68.478	0	548	59.219	68.236	0.726	97.439	18763	1.558	0.642	0.859	0.811408	1.40016	362	CEP170_KAN619-13_2.tif:0006-0945	1.423	84.394	0	360	59.219	68.236	0.726	120.086	23124	1.558	0.642	0.859
353	SCLT1_KAN619-13_2.tif:0007-1036	1.007	27.309	0	192	0.833	74.706	0.817	27.513	5298	1.634	0.612	0.911	0.227587	0.395355	363	CEP170_KAN619-13_2.tif:0007-1036	1.007	119.995	0	412	0.833	74.706	0.817	120.891	23279	1.634	0.612	0.911
354	SCLT1_KAN619-13_2.tif:0008-1065	1.132	61.959	0	501	21.643	76.729	0.731	70.144	13507	1.643	0.609	0.867	0.65965	1.00794	364	CEP170_KAN619-13_2.tif:0008-1065	1.132	93.927	0	341	21.643	76.729	0.731	106.335	20476	1.643	0.609	0.867
355	SCLT1_KAN619-13_2.tif:0009-1137	0.737	14.007	0	96	73.312	81.972	0.829	10.329	1989	1.766	0.566	0.934	0.136308	0.148426	365	CEP170_KAN619-13_2.tif:0009-1137	0.737	102.761	0	293	73.312	81.972	0.829	75.778	14592	1.766	0.566	0.934
356	SCLT1_KAN619-13_2.tif:0010-1179	1.007	77.835	0	552	74.477	85.001	0.807	78.417	15100	1.16	0.862	0.913	0.751281	1.12681	366	CEP170_KAN619-13_2.tif:0010-1179	1.007	103.603	0	334	74.477	85.001	0.807	104.377	20099	1.16	0.862	0.913
367	SCLT1_KAN619-13_3.tif:0001-0133	0.919	61.395	0	414	55.651	9.626	0.829	56.434	10867	1.421	0.704	0.917	0.527832	0.810933	378	CEP170_KAN619-13_3.tif:0001-0133	0.919	116.316	0	379	55.651	9.626	0.829	106.917	20588	1.421	0.704	0.917
368	SCLT1_KAN619-13_3.tif:0002-0154	0.685	16.318	0	55	14.323	11.122	0.949	11.186	2154	1.113	0.898	0.946	0.12263	0.160739	379	CEP170_KAN619-13_3.tif:0002-0154	0.685	133.068	0	419	14.323	11.122	0.949	91.218	17565	1.113	0.898	0.946
369	SCLT1_KAN619-13_3.tif:0003-0478	0.961	33.605	0	171	37.171	34.433	0.89	32.286	6217	1.095	0.913	0.896	0.277929	0.463934	380	CEP170_KAN619-13_3.tif:0003-0478	0.961	120.914	0	396	37.171	34.433	0.89	116.166	22369	1.095	0.913	0.896
370	SCLT1_KAN619-13_3.tif:0004-0541	0.888	24.947	0	311	50.913	39.008	0.887	22.154	4266	1.281	0.781	0.932	0.200122	0.318344	381	CEP170_KAN619-13_3.tif:0004-0541	0.888	124.661	0	323	50.913	39.008	0.887	110.702	21317	1.281	0.781	0.932
371	SCLT1_KAN619-13_3.tif:0005-0630	0.914	9.824	0	83	84.331	45.454	0.664	8.979	1729	2.22	0.45	0.863	0.0891513	0.129024	382	CEP170_KAN619-13_3.tif:0005-0630	0.914	110.193	0	278	84.331	45.454	0.664	100.716	19394	2.22	0.45	0.863
372	SCLT1_KAN619-13_3.tif:0006-0668	0.93	87.508	0	438	87.813	48.125	0.878	81.345	15664	1.173	0.852	0.932	0.672939	1.1689	383	CEP170_KAN619-13_3.tif:0006-0668	0.93	130.039	0	396	87.813	48.125	0.878	120.881	23277	1.173	0.852	0.932
373	SCLT1_KAN619-13_3.tif:0007-0816	0.935	28.467	0	200	5.205	58.833	0.775	26.61	5124	1.779	0.562	0.893	0.258657	0.382371	384	CEP170_KAN619-13_3.tif:0007-0816	0.935	110.056	0	330	5.205	58.833	0.775	102.876	19810	1.779	0.562	0.893
374	SCLT1_KAN619-13_3.tif:0008-0833	0.81	26.84	0	97	81.666	60.06	0.959	21.744	4187	1.111	0.9	0.948	0.186122	0.312448	385	CEP170_KAN619-13_3.tif:0008-0833	0.81	144.205	0	433	81.666	60.06	0.959	116.825	22496	1.111	0.9	0.948
375	SCLT1_KAN619-13_3.tif:0009-0906	1.054	62.552	0	427	34.545	65.217	0.786	65.943	12698	1.387	0.721	0.923	0.670115	0.947569	386	CEP170_KAN619-13_3.tif:0009-0906	1.054	93.345	0	409	34.545	65.217	0.786	98.405	18949	1.387	0.721	0.923
376	SCLT1_KAN619-13_3.tif:0010-1107	0.774	25.604	0	129	64.432	79.779	0.902	19.812	3815	1.235	0.81	0.952	0.166354	0.284689	387	CEP170_KAN619-13_3.tif:0010-1107	0.774	153.913	0	491	64.432	79.779	0.902	119.094	22933	1.235	0.81	0.952
377	SCLT1_KAN619-13_3.tif:0011-1124	0.831	33.712	0	234	10.941	81.007	0.83	28.012	5394	1.504	0.665	0.907	0.29955	0.402519	388	CEP170_KAN619-13_3.tif:0011-1124	0.831	112.544	0	314	10.941	81.007	0.83	93.513	18007	1.504	0.665	0.907
389	SCLT1_KAN619-13_4.tif:0001-0220	1.059	62.961	0	383	86.758	15.902	0.909	66.701	12844	1.117	0.896	0.909	0.437764	0.958464	396	CEP170_KAN619-13_4.tif:0001-0220	1.059	143.824	0	527	86.758	15.902	0.909	152.367	29340	1.117	0.896	0.909
390	SCLT1_KAN619-13_4.tif:0002-0248	0.763	71.32	0	272	63.704	17.865	0.881	54.445	10484	1.35	0.741	0.922	0.553275	0.782352	397	CEP170_KAN619-13_4.tif:0002-0248	0.763	128.905	0	459	63.704	17.865	0.881	98.405	18949	1.35	0.741	0.922
391	SCLT1_KAN619-13_4.tif:0003-0416	0.867	34.228	0	216	42.434	29.993	0.79	29.684	5716	1.515	0.66	0.905	0.324275	0.426548	398	CEP170_KAN619-13_4.tif:0003-0416	0.867	105.551	0	335	42.434	29.993	0.79	91.54	17627	1.515	0.66	0.905
392	SCLT1_KAN619-13_4.tif:0004-0435	0.914	66.585	0	369	57.437	31.337	0.748	60.858	11719	1.941	0.515	0.896	0.850374	0.874512	399	CEP170_KAN619-13_4.tif:0004-0435	0.914	78.301	0	321	57.437	31.337	0.748	71.567	13781	1.941	0.515	0.896
393	SCLT1_KAN619-13_4.tif:0005-0463	0.618	49.059	0	167	3.002	33.354	0.902	30.318	5838	1.131	0.884	0.952	0.366824	0.435652	400	CEP170_KAN619-13_4.tif:0005-0463	0.618	133.739	0	405	3.002	33.354	0.902	82.649	15915	1.131	0.884	0.952
394	SCLT1_KAN619-13_4.tif:0006-0968	1.158	75.848	0	489	54.186	69.786	0.849	87.837	16914	1.477	0.677	0.925	0.583523	1.26218	401	CEP170_KAN619-13_4.tif:0006-0968	1.158	129.982	0	714	54.186	69.786	0.849	150.529	28986	1.477	0.677	0.925
395	SCLT1_KAN619-13_4.tif:0007-1173	0.966	77.204	0	438	87.936	84.605	0.883	74.574	14360	1.042	0.96	0.916	0.709311	1.07159	402	CEP170_KAN619-13_4.tif:0007-1173	0.966	108.844	0	340	87.936	84.605	0.883	105.135	20245	1.042	0.96	0.916
403	SCLT1_KAN619-13_5.tif:0001-0294	0.644	21.435	0	133	39.253	21.217	0.913	13.803	2658	1.105	0.905	0.976	0.130301	0.198349	413	CEP170_KAN619-13_5.tif:0001-0294	0.644	164.508	0	644	39.253	21.217	0.913	105.935	20399	1.105	0.905	0.976
404	SCLT1_KAN619-13_5.tif:0002-0376	1.054	68.911	0	408	80.956	27.121	0.873	72.647	13989	1.171	0.854	0.919	0.534115	1.04391	414	CEP170_KAN619-13_5.tif:0002-0376	1.054	129.02	0	435	80.956	27.121	0.873	136.014	26191	1.171	0.854	0.919
405	SCLT1_KAN619-13_5.tif:0003-0467	0.68	68.595	0	242	8.333	33.659	0.916	46.666	8986	1.11	0.901	0.929	0.521593	0.670567	415	CEP170_KAN619-13_5.tif:0003-0467	0.68	131.511	0	427	8.333	33.659	0.916	89.468	17228	1.11	0.901	0.929
406	SCLT1_KAN619-13_5.tif:0004-0632	0.706	51.522	0	174	77.378	45.571	0.951	36.388	7007	1.093	0.915	0.951	0.341123	0.522887	416	CEP170_KAN619-13_5.tif:0004-0632	0.706	151.037	0	478	77.378	45.571	0.951	106.672	20541	1.093	0.915	0.951
407	SCLT1_KAN619-13_5.tif:0005-0691	1.065	83.561	0	507	68.064	49.825	0.838	88.959	17130	1.135	0.881	0.899	0.546394	1.2783	417	CEP170_KAN619-13_5.tif:0005-0691	1.065	152.932	0	571	68.064	49.825	0.838	162.81	31351	1.135	0.881	0.899
408	SCLT1_KAN619-13_5.tif:0006-0749	0.93	38.676	0	142	45.711	54.016	0.92	35.952	6923	1.177	0.849	0.932	0.243262	0.516618	418	CEP170_KAN619-13_5.tif:0006-0749	0.93	158.989	0	530	45.711	54.016	0.92	147.792	28459	1.177	0.849	0.932
409	SCLT1_KAN619-13_5.tif:0007-0764	1.148	55.778	0	315	88.598	55.058	0.786	64.016	12327	1.336	0.748	0.87	0.459089	0.919884	419	CEP170_KAN619-13_5.tif:0007-0764	1.148	121.498	0	358	88.598	55.058	0.786	139.441	26851	1.336	0.748	0.87
410	SCLT1_KAN619-13_5.tif:0008-1048	0.888	53.725	0	244	26.187	75.521	0.887	47.709	9187	1.464	0.683	0.937	0.36111	0.685566	420	CEP170_KAN619-13_5.tif:0008-1048	0.888	148.778	0	462	26.187	75.521	0.887	132.119	25441	1.464	0.683	0.937
411	SCLT1_KAN619-13_5.tif:0009-1092	0.966	30.882	0	130	77.909	78.681	0.883	29.829	5744	1.397	0.716	0.921	0.228344	0.428637	421	CEP170_KAN619-13_5.tif:0009-1092	0.966	135.242	0	361	77.909	78.681	0.883	130.634	25155	1.397	0.716	0.921
412	SCLT1_KAN619-13_5.tif:0010-1158	0.639	51.179	0	210	5.269	83.437	0.948	32.691	6295	1.101	0.908	0.939	0.400955	0.469755	422	CEP170_KAN619-13_5.tif:0010-1158	0.639	127.642	0	440	5.269	83.437	0.948	81.532	15700	1.101	0.908	0.939
423	SCLT1_KAN619-13_6.tif:0001-0212	0.904	68.575	0	512	22.446	15.333	0.823	61.965	11932	1.068	0.936	0.923	0.550598	0.890407	429	CEP170_KAN619-13_6.tif:0001-0212	0.904	124.546	0	381	22.446	15.333	0.823	112.541	21671	1.068	0.936	0.923
424	SCLT1_KAN619-13_6.tif:0002-0462	0.592	31.035	0	218	19.302	33.336	0.816	18.373	3538	1.351	0.74	0.934	0.276061	0.264018	430	CEP170_KAN619-13_6.tif:0002-0462	0.592	112.421	0	285	19.302	33.336	0.816	66.555	12816	1.351	0.74	0.934
425	SCLT1_KAN619-13_6.tif:0003-0637	1.059	35.98	0	224	42.303	45.896	0.851	38.118	7340	1.458	0.686	0.919	0.243878	0.547736	431	CEP170_KAN619-13_6.tif:0003-0637	1.059	147.534	0	541	42.303	45.896	0.851	156.298	30097	1.458	0.686	0.919
426	SCLT1_KAN619-13_6.tif:0004-1021	0.841	16.79	0	60	32.765	73.582	0.96	14.125	2720	1.166	0.858	0.947	0.127712	0.202976	432	CEP170_KAN619-13_6.tif:0004-1021	0.841	131.469	0	344	32.765	73.582	0.96	110.604	21298	1.166	0.858	0.947
427	SCLT1_KAN619-13_6.tif:0005-1117	0.743	73.895	0	369	90.144	80.526	0.835	54.876	10567	1.514	0.661	0.908	0.793378	0.788546	433	CEP170_KAN619-13_6.tif:0005-1117	0.743	93.14	0	309	90.144	80.526	0.835	69.168	13319	1.514	0.661	0.908
428	SCLT1_KAN619-13_6.tif:0006-1120	0.769	45.655	0	255	70.912	80.702	0.877	35.09	6757	1.181	0.847	0.905	0.3728	0.504231	434	CEP170_KAN619-13_6.tif:0006-1120	0.769	122.466	0	334	70.912	80.702	0.877	94.126	18125	1.181	0.847	0.905
435	SCLT1_KAN619-13_7.tif:0001-0227	0.888	41.211	0	294	70.515	16.373	0.896	36.596	7047	1.259	0.794	0.961	0.252111	0.525872	443	CEP170_KAN619-13_7.tif:0001-0227	0.888	163.462	0	601	70.515	16.373	0.896	145.159	27952	1.259	0.794	0.961
436	SCLT1_KAN619-13_7.tif:0002-0546	1.059	53.24	0	376	65.564	39.399	0.761	56.403	10861	1.403	0.713	0.861	0.441235	0.810486	444	CEP170_KAN619-13_7.tif:0002-0546	1.059	120.662	0	491	65.564	39.399	0.761	127.829	24615	1.403	0.713	0.861
437	SCLT1_KAN619-13_7.tif:0003-0591	0.93	45.978	0	228	48.203	42.63	0.898	42.74	8230	1.361	0.735	0.94	0.296844	0.614151	445	CEP170_KAN619-13_7.tif:0003-0591	0.93	154.888	0	546	48.203	42.63	0.898	143.98	27725	1.361	0.735	0.94
438	SCLT1_KAN619-13_7.tif:0004-0675	0.909	50.783	0	278	15.86	48.759	0.767	46.151	8887	1.387	0.721	0.904	0.708918	0.663179	446	CEP170_KAN619-13_7.tif:0004-0675	0.909	71.634	0	258	15.86	48.759	0.767	65.101	12536	1.387	0.721	0.904
439	SCLT1_KAN619-13_7.tif:0005-0846	0.966	63.511	0	234	34.967	60.975	0.933	61.347	11813	1.328	0.753	0.947	0.439586	0.881527	447	CEP170_KAN619-13_7.tif:0005-0846	0.966	144.478	0	393	34.967	60.975	0.933	139.555	26873	1.328	0.753	0.947
440	SCLT1_KAN619-13_7.tif:0006-0852	0.717	62.203	0	269	12.2	61.405	0.914	44.578	8584	1.314	0.761	0.962	0.492626	0.640568	448	CEP170_KAN619-13_7.tif:0006-0852	0.717	126.268	0	344	12.2	61.405	0.914	90.491	17425	1.314	0.761	0.962
441	SCLT1_KAN619-13_7.tif:0007-1033	1.065	44.551	0	289	76.867	74.457	0.78	47.429	9133	1.501	0.666	0.891	0.422687	0.681536	449	CEP170_KAN619-13_7.tif:0007-1033	1.065	105.4	0	356	76.867	74.457	0.78	112.208	21607	1.501	0.666	0.891
442	SCLT1_KAN619-13_7.tif:0008-1247	0.763	39.279	0	228	43.519	89.809	0.817	29.985	5774	1.181	0.847	0.899	0.298275	0.430876	450	CEP170_KAN619-13_7.tif:0008-1247	0.763	131.687	0	402	43.519	89.809	0.817	100.529	19358	1.181	0.847	0.899
									AVERAGE	8794.26					0.656258
									SEM	616.776
451	SCLT1_KAN619-14_1.tif:0001-0268	0.94	38.138	0	263	16.891	19.297	0.803	35.848	6903	1.424	0.702	0.905	0.321174	0.515126	459	CEP170_KAN619-14_1.tif:0001-0268	0.94	118.746	0	341	16.891	19.297	0.803	111.616	21493	1.424	0.702	0.905
452	SCLT1_KAN619-14_1.tif:0002-0294	0.784	57.093	0	192	59.242	21.235	0.978	44.77	8621	1.179	0.848	0.947	0.389685	0.643329	460	CEP170_KAN619-14_1.tif:0002-0294	0.784	146.51	0	496	59.242	21.235	0.978	114.888	22123	1.179	0.848	0.947
453	SCLT1_KAN619-14_1.tif:0003-0307	1.018	128.99	0	799	77.306	22.186	0.898	131.293	25282	1.178	0.849	0.947	1.81311	1.88663	461	CEP170_KAN619-14_1.tif:0003-0307	1.018	71.143	0	316	77.306	22.186	0.898	72.413	13944	1.178	0.849	0.947
454	SCLT1_KAN619-14_1.tif:0004-0464	0.556	11.551	0	54	16.652	33.413	0.924	6.419	1236	1.241	0.806	0.951	0.104348	0.0922346	462	CEP170_KAN619-14_1.tif:0004-0464	0.556	110.701	0	282	16.652	33.413	0.924	61.513	11845	1.241	0.806	0.951
455	SCLT1_KAN619-14_1.tif:0005-0535	0.976	65.707	0	255	71	38.58	0.762	64.151	12353	1.571	0.636	0.87	0.490919	0.921824	463	CEP170_KAN619-14_1.tif:0005-0535	0.976	133.846	0	478	71	38.58	0.762	130.675	25163	1.571	0.636	0.87
456	SCLT1_KAN619-14_1.tif:0006-0848	1.246	67.817	0	469	25.026	61.155	0.761	84.524	16276	2.145	0.466	0.966	1.20056	1.21457	464	CEP170_KAN619-14_1.tif:0006-0848	1.246	56.487	0	253	25.026	61.155	0.761	70.403	13557	2.145	0.466	0.966
457	SCLT1_KAN619-14_1.tif:0007-0955	0.971	95.16	0	499	44.167	68.825	0.908	92.412	17795	1.092	0.916	0.926	0.689008	1.32792	465	CEP170_KAN619-14_1.tif:0007-0955	0.971	138.112	0	440	44.167	68.825	0.908	134.123	25827	1.092	0.916	0.926
458	SCLT1_KAN619-14_1.tif:0008-1091	1.21	70.644	0	511	73.427	78.703	0.828	85.479	16460	1.439	0.695	0.914	0.492696	1.2283	466	CEP170_KAN619-14_1.tif:0008-1091	1.21	143.382	0	739	73.427	78.703	0.828	173.493	33408	1.439	0.695	0.914
467	SCLT1_KAN619-14_2.tif:0001-0210	1.049	53.406	0	333	58.403	15.158	0.843	56.024	10788	1.44	0.694	0.904	0.420175	0.805038	475	CEP170_KAN619-14_2.tif:0001-0210	1.049	127.104	0	512	58.403	15.158	0.843	133.334	25675	1.44	0.694	0.904
468	SCLT1_KAN619-14_2.tif:0002-0327	1.075	92.657	0	693	3.847	23.576	0.899	99.605	19180	1.041	0.96	0.945	0.565748	1.43128	476	CEP170_KAN619-14_2.tif:0002-0327	1.075	163.778	0	514	3.847	23.576	0.899	176.058	33902	1.041	0.96	0.945
469	SCLT1_KAN619-14_2.tif:0003-0486	0.971	81.064	0	574	28.995	35.046	0.908	78.723	15159	1.166	0.857	0.928	0.57742	1.13122	477	CEP170_KAN619-14_2.tif:0003-0486	0.971	140.39	0	510	28.995	35.046	0.908	136.336	26253	1.166	0.857	0.928
470	SCLT1_KAN619-14_2.tif:0004-0528	1.091	103.248	0	653	41.508	38.062	0.866	112.598	21682	1.407	0.711	0.933	1.00259	1.61799	478	CEP170_KAN619-14_2.tif:0004-0528	1.091	102.981	0	422	41.508	38.062	0.866	112.307	21626	1.407	0.711	0.933
471	SCLT1_KAN619-14_2.tif:0005-0594	0.608	34.462	0	95	64.02	42.826	0.968	20.939	4032	1.164	0.859	0.951	0.272285	0.300882	479	CEP170_KAN619-14_2.tif:0005-0594	0.608	126.564	0	392	64.02	42.826	0.968	76.9	14808	1.164	0.859	0.951
472	SCLT1_KAN619-14_2.tif:0006-0857	1.117	160.247	0	969	68.51	61.764	0.853	178.919	34453	1.166	0.858	0.909	1.03497	2.571	480	CEP170_KAN619-14_2.tif:0006-0857	1.117	154.833	0	561	68.51	61.764	0.853	172.875	33289	1.166	0.858	0.909
473	SCLT1_KAN619-14_2.tif:0007-0929	0.623	39.833	0	144	37.845	66.997	0.936	24.823	4780	1.077	0.928	0.96	0.328364	0.3567	481	CEP170_KAN619-14_2.tif:0007-0929	0.623	121.308	0	264	37.845	66.997	0.936	75.597	14557	1.077	0.928	0.96
474	SCLT1_KAN619-14_2.tif:0008-1088	0.95	61.76	0	437	22.499	78.473	0.869	58.693	11302	1.576	0.635	0.931	0.583058	0.843394	482	CEP170_KAN619-14_2.tif:0008-1088	0.95	105.923	0	405	22.499	78.473	0.869	100.664	19384	1.576	0.635	0.931
483	SCLT1_KAN619-14_3.tif:0001-0019	1.2	70.29	0	541	23.745	1.358	0.734	84.321	16237	1.767	0.566	0.888	0.634134	1.21166	493	CEP170_KAN619-14_3.tif:0001-0019	1.2	110.844	0	535	23.745	1.358	0.734	132.971	25605	1.767	0.566	0.888
484	SCLT1_KAN619-14_3.tif:0002-0055	0.602	21.241	0	109	47.593	4.008	0.894	12.796	2464	1.241	0.806	0.921	0.192545	0.183872	494	CEP170_KAN619-14_3.tif:0002-0055	0.602	110.319	0	274	47.593	4.008	0.894	66.457	12797	1.241	0.806	0.921
485	SCLT1_KAN619-14_3.tif:0003-0344	1.48	64.667	0	507	79.539	24.744	0.755	95.71	18430	1.738	0.575	0.909	0.523803	1.37531	495	CEP170_KAN619-14_3.tif:0003-0344	1.48	123.456	0	499	79.539	24.744	0.755	182.721	35185	1.738	0.575	0.909
486	SCLT1_KAN619-14_3.tif:0004-0448	0.914	61.79	0	454	54.299	32.243	0.717	56.475	10875	1.231	0.812	0.85	0.8014	0.81153	496	CEP170_KAN619-14_3.tif:0004-0448	0.914	77.102	0	233	54.299	32.243	0.717	70.471	13570	1.231	0.812	0.85
487	SCLT1_KAN619-14_3.tif:0005-0487	0.94	154.762	0	861	63.044	35.14	0.887	145.47	28012	1.189	0.841	0.933	1.37536	2.09035	497	CEP170_KAN619-14_3.tif:0005-0487	0.94	112.525	0	393	63.044	35.14	0.887	105.769	20367	1.189	0.841	0.933
488	SCLT1_KAN619-14_3.tif:0006-0571	0.576	7.027	0	37	7.986	41.179	0.93	4.051	780	1.015	0.985	0.961	0.058357	0.0582063	498	CEP170_KAN619-14_3.tif:0006-0571	0.576	120.414	0	332	7.986	41.179	0.93	69.412	13366	1.015	0.985	0.961
489	SCLT1_KAN619-14_3.tif:0007-0657	0.691	38.496	0	150	84.3	47.374	0.881	26.589	5120	1.39	0.72	0.94	0.389798	0.382072	499	CEP170_KAN619-14_3.tif:0007-0657	0.691	98.759	0	291	84.3	47.374	0.881	68.212	13135	1.39	0.72	0.94
490	SCLT1_KAN619-14_3.tif:0008-0935	1.033	66.91	0	425	75.271	67.369	0.813	69.147	13315	1.651	0.606	0.911	0.454313	0.993612	500	CEP170_KAN619-14_3.tif:0008-0935	1.033	147.276	0	561	75.271	67.369	0.813	152.201	29308	1.651	0.606	0.911
491	SCLT1_KAN619-14_3.tif:0009-0965	0.779	78.84	0	364	8.475	69.568	0.932	61.414	11826	1.051	0.952	0.952	0.618159	0.882497	501	CEP170_KAN619-14_3.tif:0009-0965	0.779	127.54	0	338	8.475	69.568	0.932	99.35	19131	1.051	0.952	0.952
492	SCLT1_KAN619-14_3.tif:0010-1019	1.226	61.919	0	425	41.688	73.385	0.807	75.887	14613	1.072	0.933	0.891	0.554237	1.09047	502	CEP170_KAN619-14_3.tif:0010-1019	1.226	111.72	0	415	41.688	73.385	0.807	136.923	26366	1.072	0.933	0.891
503	SCLT1_KAN619-14_4.tif:0001-0097	0.556	23.271	0	89	12.635	6.972	0.834	12.931	2490	1.13	0.885	0.911	0.205293	0.185812	514	CEP170_KAN619-14_4.tif:0001-0097	0.556	113.355	0	249	12.635	6.972	0.834	62.988	12129	1.13	0.885	0.911
504	SCLT1_KAN619-14_4.tif:0002-0147	1.111	75.252	0	507	53.051	10.607	0.822	83.63	16104	1.723	0.58	0.926	0.681939	1.20174	515	CEP170_KAN619-14_4.tif:0002-0147	1.111	110.35	0	398	53.051	10.607	0.822	122.636	23615	1.723	0.58	0.926
505	SCLT1_KAN619-14_4.tif:0003-0185	0.904	83.172	0	453	13.818	13.414	0.715	75.155	14472	1.322	0.757	0.877	1.16465	1.07995	516	CEP170_KAN619-14_4.tif:0003-0185	0.904	71.414	0	233	13.818	13.414	0.715	64.53	12426	1.322	0.757	0.877
506	SCLT1_KAN619-14_4.tif:0004-0334	1.397	80.654	0	486	32.059	24.085	0.789	112.671	21696	1.587	0.63	0.907	0.784893	1.61903	517	CEP170_KAN619-14_4.tif:0004-0334	1.397	102.758	0	392	32.059	24.085	0.789	143.549	27642	1.587	0.63	0.907
507	SCLT1_KAN619-14_4.tif:0005-0548	1.2	97.701	0	582	66.792	39.522	0.862	117.204	22569	1.023	0.978	0.909	0.69362	1.68418	518	CEP170_KAN619-14_4.tif:0005-0548	1.2	140.857	0	622	66.792	39.522	0.862	168.975	32538	1.023	0.978	0.909
508	SCLT1_KAN619-14_4.tif:0006-0552	1.215	67.171	0	515	55.251	39.856	0.722	81.626	15718	1.305	0.766	0.848	0.802799	1.17293	519	CEP170_KAN619-14_4.tif:0006-0552	1.215	83.671	0	337	55.251	39.856	0.722	101.677	19579	1.305	0.766	0.848
509	SCLT1_KAN619-14_4.tif:0007-0734	1.506	57.097	0	632	39.222	52.865	0.721	85.988	16558	1.748	0.572	0.858	0.506531	1.23562	520	CEP170_KAN619-14_4.tif:0007-0734	1.506	112.721	0	619	39.222	52.865	0.721	169.759	32689	1.748	0.572	0.858
510	SCLT1_KAN619-14_4.tif:0008-0794	1.433	70.174	0	470	10.091	57.195	0.702	100.581	19368	1.891	0.529	0.853	0.651529	1.44531	521	CEP170_KAN619-14_4.tif:0008-0794	1.433	107.707	0	485	10.091	57.195	0.702	154.377	29727	1.891	0.529	0.853
511	SCLT1_KAN619-14_4.tif:0009-0948	0.961	66.681	0	409	65.871	68.292	0.898	64.063	12336	1.05	0.952	0.914	0.430126	0.920555	522	CEP170_KAN619-14_4.tif:0009-0948	0.961	155.027	0	517	65.871	68.292	0.898	148.939	28680	1.05	0.952	0.914
512	SCLT1_KAN619-14_4.tif:0010-1146	0.826	34.748	0	208	82.351	82.565	0.919	28.692	5525	1.145	0.874	0.933	0.248315	0.412295	523	CEP170_KAN619-14_4.tif:0010-1146	0.826	139.937	0	399	82.351	82.565	0.919	115.548	22250	1.145	0.874	0.933
513	SCLT1_KAN619-14_4.tif:0011-1146	0.846	98.791	0	501	12.937	82.652	0.919	83.625	16103	1.272	0.786	0.939	1.00137	1.20166	524	CEP170_KAN619-14_4.tif:0011-1146	0.846	98.656	0	275	12.937	82.652	0.919	83.511	16081	1.272	0.786	0.939
525	SCLT1_KAN619-14_5.tif:0001-0060	1.262	63.49	0	523	54.412	4.293	0.77	80.12	15428	1.782	0.561	0.92	0.973007	1.15129	535	CEP170_KAN619-14_5.tif:0001-0060	1.262	65.251	0	272	54.412	4.293	0.77	82.343	15856	1.782	0.561	0.92
526	SCLT1_KAN619-14_5.tif:0002-0285	0.608	17.607	0	214	70.784	20.6	0.805	10.698	2060	1.744	0.574	0.951	0.150541	0.153724	536	CEP170_KAN619-14_5.tif:0002-0285	0.608	116.957	0	307	70.784	20.6	0.805	71.063	13684	1.744	0.574	0.951
527	SCLT1_KAN619-14_5.tif:0003-0438	0.883	70.618	0	412	13.215	31.602	0.882	62.344	12005	1.463	0.684	0.942	0.560248	0.895855	537	CEP170_KAN619-14_5.tif:0003-0438	0.883	126.047	0	365	13.215	31.602	0.882	111.279	21428	1.463	0.684	0.942
528	SCLT1_KAN619-14_5.tif:0004-0655	0.935	32.35	0	261	52.927	47.212	0.903	30.24	5823	1.188	0.842	0.938	0.214633	0.434532	538	CEP170_KAN619-14_5.tif:0004-0655	0.935	150.722	0	556	52.927	47.212	0.903	140.89	27130	1.188	0.842	0.938
529	SCLT1_KAN619-14_5.tif:0005-0868	1.122	69.463	0	452	25.804	62.515	0.711	77.918	15004	1.813	0.551	0.876	0.805324	1.11965	539	CEP170_KAN619-14_5.tif:0005-0868	1.122	86.255	0	413	25.804	62.515	0.711	96.754	18631	1.813	0.551	0.876
530	SCLT1_KAN619-14_5.tif:0006-0880	0.857	92.376	0	344	17.053	63.395	0.817	79.154	15242	1.266	0.79	0.904	0.794061	1.13741	540	CEP170_KAN619-14_5.tif:0006-0880	0.857	116.333	0	350	17.053	63.395	0.817	99.682	19195	1.266	0.79	0.904
531	SCLT1_KAN619-14_5.tif:0007-0893	1.355	91.268	0	529	81.351	64.329	0.808	123.706	23821	1.571	0.637	0.895	0.933864	1.77761	541	CEP170_KAN619-14_5.tif:0007-0893	1.355	97.732	0	405	81.351	64.329	0.808	132.467	25508	1.571	0.637	0.895
532	SCLT1_KAN619-14_5.tif:0008-1086	0.909	80.474	0	517	41.229	78.33	0.801	73.135	14083	1.498	0.668	0.902	0.899355	1.05092	542	CEP170_KAN619-14_5.tif:0008-1086	0.909	89.48	0	366	41.229	78.33	0.801	81.319	15659	1.498	0.668	0.902
533	SCLT1_KAN619-14_5.tif:0009-1100	1.179	54.714	0	522	54.067	79.213	0.701	64.499	12420	1.559	0.641	0.858	0.70114	0.926824	543	CEP170_KAN619-14_5.tif:0009-1100	1.179	78.035	0	318	54.067	79.213	0.701	91.991	17714	1.559	0.641	0.858
534	SCLT1_KAN619-14_5.tif:0010-1121	1.002	66.855	0	449	20.056	80.836	0.82	67.007	12903	1.533	0.652	0.928	0.630676	0.962867	544	CEP170_KAN619-14_5.tif:0010-1121	1.002	106.005	0	343	20.056	80.836	0.82	106.247	20459	1.533	0.652	0.928
545	SCLT1_KAN619-14_6.tif:0001-0167	1.215	148.436	0	1081	11.223	12.067	0.928	180.379	34734	1.147	0.872	0.929	0.777308	2.59197	555	CEP170_KAN619-14_6.tif:0001-0167	1.215	190.962	0	835	11.223	12.067	0.928	232.056	44685	1.147	0.872	0.929
546	SCLT1_KAN619-14_6.tif:0002-0477	1.085	80.847	0	486	78.291	34.352	0.854	87.749	16897	1.268	0.789	0.915	0.540998	1.26091	556	CEP170_KAN619-14_6.tif:0002-0477	1.085	149.44	0	710	78.291	34.352	0.854	162.198	31233	1.268	0.789	0.915
547	SCLT1_KAN619-14_6.tif:0003-0481	0.711	125	0	397	38.198	34.674	0.874	88.933	17125	1.456	0.687	0.926	1.33175	1.27793	557	CEP170_KAN619-14_6.tif:0003-0481	0.711	93.861	0	346	38.198	34.674	0.874	66.779	12859	1.456	0.687	0.926
548	SCLT1_KAN619-14_6.tif:0004-0522	0.867	128.479	0	487	66.058	37.633	0.905	111.424	21456	1.136	0.88	0.965	1.10638	1.60112	558	CEP170_KAN619-14_6.tif:0004-0522	0.867	116.126	0	417	66.058	37.633	0.905	100.711	19393	1.136	0.88	0.965
549	SCLT1_KAN619-14_6.tif:0005-0659	0.66	185.622	0	601	59.061	47.53	0.806	122.423	23574	1.739	0.575	0.969	22.5158	1.75917	559	CEP170_KAN619-14_6.tif:0005-0659	0.66	8.244	0	40	59.061	47.53	0.806	5.437	1047	1.739	0.575	0.969
550	SCLT1_KAN619-14_6.tif:0006-0666	1.111	172.598	0	1193	29.799	47.984	0.846	191.814	36936	1.253	0.798	0.937	1.02843	2.75629	560	CEP170_KAN619-14_6.tif:0006-0666	1.111	167.827	0	657	29.799	47.984	0.846	186.512	35915	1.253	0.798	0.937
551	SCLT1_KAN619-14_6.tif:0007-0875	1.205	43.819	0	314	88.743	63.037	0.841	52.794	10166	1.204	0.83	0.901	0.342555	0.758622	561	CEP170_KAN619-14_6.tif:0007-0875	1.205	127.918	0	436	88.743	63.037	0.841	154.117	29677	1.204	0.83	0.901
552	SCLT1_KAN619-14_6.tif:0008-0931	1.34	111.81	0	883	38.166	67.119	0.836	149.807	28847	1.297	0.771	0.905	0.652618	2.15266	562	CEP170_KAN619-14_6.tif:0008-0931	1.34	171.326	0	1015	38.166	67.119	0.836	229.547	44202	1.297	0.771	0.905
553	SCLT1_KAN619-14_6.tif:0009-1065	1.148	83.679	0	584	68.785	76.729	0.911	96.037	18493	1.086	0.921	0.942	0.528704	1.38001	563	CEP170_KAN619-14_6.tif:0009-1065	1.148	158.271	0	803	68.785	76.729	0.911	181.646	34978	1.086	0.921	0.942
554	SCLT1_KAN619-14_6.tif:0010-1112	0.618	123.328	0	414	60.677	80.17	0.661	76.215	14676	2.001	0.5	0.815	38.4188	1.09517	564	CEP170_KAN619-14_6.tif:0010-1112	0.618	3.21	0	21	60.677	80.17	0.661	1.984	382	2.001	0.5	0.815
									AVERAGE	15133.4					1.12931
									SEM	1082.08
565	SCLT1_KAN619-15_1.tif:0001-0020	0.587	16.885	0	73	91.655	1.417	0.908	9.909	1908	1.242	0.805	0.95	0.115538	0.142382	576	CEP170_KAN619-15_1.tif:0001-0020	0.587	146.142	0	349	91.655	1.417	0.908	85.76	16514	1.242	0.805	0.95
566	SCLT1_KAN619-15_1.tif:0002-0105	0.769	35.709	0	173	50.66	7.59	0.91	27.446	5285	1.304	0.767	0.937	0.280267	0.394385	577	CEP170_KAN619-15_1.tif:0002-0105	0.769	127.412	0	378	50.66	7.59	0.91	97.927	18857	1.304	0.767	0.937
567	SCLT1_KAN619-15_1.tif:0003-0181	1.205	68.336	0	458	22.267	13.013	0.793	82.332	15854	1.654	0.604	0.906	0.452881	1.18308	578	CEP170_KAN619-15_1.tif:0003-0181	1.205	150.892	0	750	22.267	13.013	0.793	181.796	35007	1.654	0.604	0.906
568	SCLT1_KAN619-15_1.tif:0004-0463	1.059	21.25	0	151	9.798	33.383	0.897	22.512	4335	1.274	0.785	0.936	0.104463	0.323493	579	CEP170_KAN619-15_1.tif:0004-0463	1.059	203.422	0	771	9.798	33.383	0.897	215.505	41498	1.274	0.785	0.936
569	SCLT1_KAN619-15_1.tif:0005-0541	1.044	16.866	0	99	58.538	38.965	0.884	17.605	3390	1.325	0.755	0.937	0.0904241	0.252974	580	CEP170_KAN619-15_1.tif:0005-0541	1.044	186.517	0	701	58.538	38.965	0.884	194.691	37490	1.325	0.755	0.937
570	SCLT1_KAN619-15_1.tif:0006-0547	0.623	180.158	0	518	89.118	39.445	0.873	112.271	21619	1.494	0.669	0.949	55.4333	1.61328	581	CEP170_KAN619-15_1.tif:0006-0547	0.623	3.25	0	17	89.118	39.445	0.873	2.025	390	1.494	0.669	0.949
571	SCLT1_KAN619-15_1.tif:0007-0575	0.997	41.734	0	321	30.832	41.465	0.911	41.613	8013	1.405	0.712	0.941	0.259446	0.597958	582	CEP170_KAN619-15_1.tif:0007-0575	0.997	160.859	0	600	30.832	41.465	0.911	160.39	30885	1.405	0.712	0.941
572	SCLT1_KAN619-15_1.tif:0008-0788	0.945	55.005	0	290	28.879	56.858	0.892	51.989	10011	1.018	0.983	0.924	0.401178	0.747056	583	CEP170_KAN619-15_1.tif:0008-0788	0.945	137.11	0	514	28.879	56.858	0.892	129.59	24954	1.018	0.983	0.924
573	SCLT1_KAN619-15_1.tif:0009-0952	0.685	25.333	0	131	76.151	68.648	0.949	17.366	3344	1.126	0.888	0.943	0.190596	0.249541	584	CEP170_KAN619-15_1.tif:0009-0952	0.685	132.917	0	399	76.151	68.648	0.949	91.114	17545	1.126	0.888	0.943
574	SCLT1_KAN619-15_1.tif:0010-0970	1.085	63.77	0	359	50.733	69.885	0.869	69.214	13328	1.427	0.701	0.957	0.471687	0.994582	585	CEP170_KAN619-15_1.tif:0010-0970	1.085	135.196	0	616	50.733	69.885	0.869	146.738	28256	1.427	0.701	0.957
575	SCLT1_KAN619-15_1.tif:0011-1185	0.893	59.32	0	248	72.16	85.422	0.863	52.986	10203	1.676	0.597	0.922	0.405912	0.761383	586	CEP170_KAN619-15_1.tif:0011-1185	0.893	146.14	0	632	72.16	85.422	0.863	130.535	25136	1.676	0.597	0.922
587	SCLT1_KAN619-15_2.tif:0001-0272	0.795	55.163	0	154	6.745	19.592	0.907	43.83	8440	1.112	0.9	0.911	0.408657	0.629822	596	CEP170_KAN619-15_2.tif:0001-0272	0.795	134.987	0	459	6.745	19.592	0.907	107.254	20653	1.112	0.9	0.911
588	SCLT1_KAN619-15_2.tif:0002-0288	0.67	415.395	0	3196	33.329	20.785	0.939	278.28	53586	1.29	0.775	0.97	104.05	3.99877	597	CEP170_KAN619-15_2.tif:0002-0288	0.67	3.992	0	19	33.329	20.785	0.939	2.674	515	1.29	0.775	0.97
589	SCLT1_KAN619-15_2.tif:0003-0351	1.179	45.736	0	299	31.904	25.313	0.864	53.915	10382	1.528	0.655	0.934	0.252757	0.774741	598	CEP170_KAN619-15_2.tif:0003-0351	1.179	180.947	0	653	31.904	25.313	0.864	213.309	41075	1.528	0.655	0.934
590	SCLT1_KAN619-15_2.tif:0004-0636	1.091	48.49	0	344	41.078	45.847	0.896	52.882	10183	1.214	0.823	0.931	0.242199	0.759891	599	CEP170_KAN619-15_2.tif:0004-0636	1.091	200.21	0	846	41.078	45.847	0.896	218.341	42044	1.214	0.823	0.931
591	SCLT1_KAN619-15_2.tif:0005-0799	1.267	15.512	0	72	32.467	57.608	0.698	19.656	3785	1.466	0.682	0.829	0.191568	0.28245	600	CEP170_KAN619-15_2.tif:0005-0799	1.267	80.975	0	253	32.467	57.608	0.698	102.606	19758	1.466	0.682	0.829
592	SCLT1_KAN619-15_2.tif:0006-0821	1.314	74.7	0	427	51.247	59.213	0.848	98.145	18899	1.358	0.737	0.948	0.413147	1.41031	601	CEP170_KAN619-15_2.tif:0006-0821	1.314	180.806	0	718	51.247	59.213	0.848	237.555	45744	1.358	0.737	0.948
593	SCLT1_KAN619-15_2.tif:0007-1030	1.262	20.214	0	93	46.342	74.247	0.857	25.509	4912	1.567	0.638	0.927	0.0929951	0.36655	602	CEP170_KAN619-15_2.tif:0007-1030	1.262	217.366	0	757	46.342	74.247	0.857	274.302	52820	1.567	0.638	0.927
594	SCLT1_KAN619-15_2.tif:0008-1047	0.935	77.106	0	361	18.886	75.489	0.912	72.076	13879	1.142	0.875	0.942	0.584625	1.0357	603	CEP170_KAN619-15_2.tif:0008-1047	0.935	131.889	0	626	18.886	75.489	0.912	123.285	23740	1.142	0.875	0.942
595	SCLT1_KAN619-15_2.tif:0009-1238	1.158	58.466	0	375	70.521	89.284	0.815	67.708	13038	1.453	0.688	0.929	0.503748	0.972941	604	CEP170_KAN619-15_2.tif:0009-1238	1.158	116.063	0	486	70.521	89.284	0.815	134.409	25882	1.453	0.688	0.929
605	SCLT1_KAN619-15_3.tif:0001-0046	1.22	50.255	0	284	42.416	3.353	0.813	61.331	11810	1.686	0.593	0.9	0.305247	0.881303	611	CEP170_KAN619-15_3.tif:0001-0046	1.22	164.638	0	553	42.416	3.353	0.813	200.923	38690	1.686	0.593	0.9
606	SCLT1_KAN619-15_3.tif:0002-0343	1.293	55.735	0	359	75.746	24.712	0.792	72.07	13878	1.219	0.82	0.892	0.295938	1.03562	612	CEP170_KAN619-15_3.tif:0002-0343	1.293	188.333	0	847	75.746	24.712	0.792	243.533	46895	1.219	0.82	0.892
607	SCLT1_KAN619-15_3.tif:0003-0503	0.898	25.006	0	274	35.3	36.277	0.965	22.466	4326	1.108	0.903	0.943	0.125348	0.322821	613	CEP170_KAN619-15_3.tif:0003-0503	0.898	199.491	0	767	35.3	36.277	0.965	179.226	34512	1.108	0.903	0.943
608	SCLT1_KAN619-15_3.tif:0004-0891	1.137	16.425	0	101	54.1	64.252	0.824	18.68	3597	1.771	0.565	0.948	0.0933413	0.268421	614	CEP170_KAN619-15_3.tif:0004-0891	1.137	175.963	0	638	54.1	64.252	0.824	200.123	38536	1.771	0.565	0.948
609	SCLT1_KAN619-15_3.tif:0005-0935	0.706	7.772	0	43	13.094	67.406	0.901	5.489	1057	1.342	0.745	0.954	0.0490305	0.078877	615	CEP170_KAN619-15_3.tif:0005-0935	0.706	158.515	0	592	13.094	67.406	0.901	111.954	21558	1.342	0.745	0.954
610	SCLT1_KAN619-15_3.tif:0006-1147	0.556	23.776	0	74	55.706	82.65	0.953	13.211	2544	1.225	0.816	0.955	0.210491	0.189842	616	CEP170_KAN619-15_3.tif:0006-1147	0.556	112.953	0	339	55.706	82.65	0.953	62.764	12086	1.225	0.816	0.955
617	SCLT1_KAN619-15_4.tif:0001-0079	0.779	70.607	0	269	61.652	5.706	0.899	55.001	10591	1.375	0.727	0.932	0.55268	0.790337	627	CEP170_KAN619-15_4.tif:0001-0079	0.779	127.753	0	441	61.652	5.706	0.899	99.516	19163	1.375	0.727	0.932
618	SCLT1_KAN619-15_4.tif:0002-0154	1.137	18.877	0	106	76.488	11.078	0.794	21.468	4134	1.148	0.871	0.869	0.104086	0.308493	628	CEP170_KAN619-15_4.tif:0002-0154	1.137	181.356	0	758	76.488	11.078	0.794	206.256	39717	1.148	0.871	0.869
619	SCLT1_KAN619-15_4.tif:0003-0403	0.779	42.513	0	178	66.487	29.063	0.922	33.117	6377	1.332	0.751	0.938	0.269208	0.475874	629	CEP170_KAN619-15_4.tif:0003-0403	0.779	157.92	0	567	66.487	29.063	0.922	123.015	23688	1.332	0.751	0.938
620	SCLT1_KAN619-15_4.tif:0004-0426	1.07	26.932	0	183	35.015	30.722	0.906	28.812	5548	1.203	0.831	0.934	0.120743	0.414011	630	CEP170_KAN619-15_4.tif:0004-0426	1.07	223.053	0	970	35.015	30.722	0.906	238.62	45949	1.203	0.831	0.934
621	SCLT1_KAN619-15_4.tif:0005-0572	0.878	41.87	0	156	20.342	41.234	0.829	36.747	7076	1.549	0.645	0.909	0.318208	0.528036	631	CEP170_KAN619-15_4.tif:0005-0572	0.878	131.58	0	508	20.342	41.234	0.829	115.48	22237	1.549	0.645	0.909
622	SCLT1_KAN619-15_4.tif:0006-0695	0.774	14.369	0	50	68.14	50.108	0.94	11.119	2141	1.343	0.745	0.949	0.106863	0.159769	632	CEP170_KAN619-15_4.tif:0006-0695	0.774	134.463	0	316	68.14	50.108	0.94	104.045	20035	1.343	0.745	0.949
623	SCLT1_KAN619-15_4.tif:0007-0723	1.007	70.943	0	382	5.708	52.148	0.942	71.473	13763	1.236	0.809	0.937	0.315694	1.02704	633	CEP170_KAN619-15_4.tif:0007-0723	1.007	224.722	0	966	5.708	52.148	0.942	226.4	43596	1.236	0.809	0.937
624	SCLT1_KAN619-15_4.tif:0008-0769	0.831	41.556	0	155	42.724	55.445	0.85	34.529	6649	1.639	0.61	0.92	0.286434	0.496171	634	CEP170_KAN619-15_4.tif:0008-0769	0.831	145.081	0	508	42.724	55.445	0.85	120.549	23213	1.639	0.61	0.92
625	SCLT1_KAN619-15_4.tif:0009-1122	1.054	50.916	0	414	45.89	80.868	0.837	53.676	10336	1.41	0.709	0.916	0.362349	0.771308	635	CEP170_KAN619-15_4.tif:0009-1122	1.054	140.517	0	581	45.89	80.868	0.837	148.135	28525	1.41	0.709	0.916
626	SCLT1_KAN619-15_4.tif:0010-1225	0.94	39.923	0	256	1.2	88.279	0.829	37.526	7226	1.722	0.581	0.948	0.376197	0.539229	636	CEP170_KAN619-15_4.tif:0010-1225	0.94	106.122	0	301	1.2	88.279	0.829	99.75	19208	1.722	0.581	0.948
637	SCLT1_KAN619-15_5.tif:0001-0164	0.867	70.641	0	513	49.262	11.823	0.896	61.264	11797	1.197	0.835	0.946	0.644574	0.880333	645	CEP170_KAN619-15_5.tif:0001-0164	0.867	109.593	0	341	49.262	11.823	0.896	95.045	18302	1.197	0.835	0.946
638	SCLT1_KAN619-15_5.tif:0002-0218	1.381	98.233	0	650	23.207	15.77	0.855	135.697	26130	1.235	0.81	0.905	0.487082	1.94991	646	CEP170_KAN619-15_5.tif:0002-0218	1.381	201.677	0	964	23.207	15.77	0.855	278.592	53646	1.235	0.81	0.905
639	SCLT1_KAN619-15_5.tif:0003-0389	1.158	33.668	0	303	79.965	27.982	0.78	38.99	7508	1.477	0.677	0.871	0.226213	0.560273	647	CEP170_KAN619-15_5.tif:0003-0389	1.158	148.834	0	599	79.965	27.982	0.78	172.361	33190	1.477	0.677	0.871
640	SCLT1_KAN619-15_5.tif:0004-0437	1.007	41.655	0	193	54.931	31.527	0.853	41.966	8081	1.168	0.856	0.9	0.286235	0.603032	648	CEP170_KAN619-15_5.tif:0004-0437	1.007	145.526	0	474	54.931	31.527	0.853	146.613	28232	1.168	0.856	0.9
641	SCLT1_KAN619-15_5.tif:0005-0847	0.8	22.292	0	107	14.754	61.072	0.923	17.828	3433	1.244	0.804	0.945	0.151621	0.256182	649	CEP170_KAN619-15_5.tif:0005-0847	0.8	147.026	0	432	14.754	61.072	0.923	117.583	22642	1.244	0.804	0.945
642	SCLT1_KAN619-15_5.tif:0006-0854	0.649	26.888	0	138	56.329	61.523	0.797	17.454	3361	1.41	0.709	0.874	0.224037	0.250809	650	CEP170_KAN619-15_5.tif:0006-0854	0.649	120.016	2	334	56.329	61.523	0.797	77.908	15002	1.41	0.709	0.874
643	SCLT1_KAN619-15_5.tif:0007-1023	0.815	34.108	0	164	42.613	73.725	0.894	27.809	5355	1.227	0.815	0.943	0.16943	0.399609	651	CEP170_KAN619-15_5.tif:0007-1023	0.815	201.312	0	750	42.613	73.725	0.894	164.135	31606	1.227	0.815	0.943
644	SCLT1_KAN619-15_5.tif:0008-1084	1.028	34.652	0	248	72.425	78.051	0.871	35.63	6861	1.254	0.797	0.927	0.210648	0.511992	652	CEP170_KAN619-15_5.tif:0008-1084	1.028	164.5	0	585	72.425	78.051	0.871	169.146	32571	1.254	0.797	0.927
653	SCLT1_KAN619-15_6.tif:0001-0179	0.924	83.236	0	335	26.118	12.879	0.881	76.942	14816	1.303	0.768	0.939	0.411601	1.10562	663	CEP170_KAN619-15_6.tif:0001-0179	0.924	202.225	0	779	26.118	12.879	0.881	186.933	35996	1.303	0.768	0.939
654	SCLT1_KAN619-15_6.tif:0002-0187	0.836	41.429	0	217	89.966	13.48	0.908	34.638	6670	1.049	0.953	0.928	0.279841	0.497739	664	CEP170_KAN619-15_6.tif:0002-0187	0.836	148.043	0	513	89.966	13.48	0.908	123.779	23835	1.049	0.953	0.928
655	SCLT1_KAN619-15_6.tif:0003-0235	0.893	52.605	0	218	67.348	16.984	0.914	46.988	9048	1.338	0.747	0.948	0.34024	0.675193	665	CEP170_KAN619-15_6.tif:0003-0235	0.893	154.61	0	499	67.348	16.984	0.914	138.101	26593	1.338	0.747	0.948
656	SCLT1_KAN619-15_6.tif:0004-0346	1.246	60.292	0	542	81.129	24.954	0.877	75.145	14470	1.408	0.71	0.95	0.414364	1.0798	666	CEP170_KAN619-15_6.tif:0004-0346	1.246	145.504	0	540	81.129	24.954	0.877	181.35	34921	1.408	0.71	0.95
657	SCLT1_KAN619-15_6.tif:0005-0380	0.763	24.054	0	93	46.39	27.427	0.89	18.363	3536	1.39	0.719	0.955	0.161801	0.263869	667	CEP170_KAN619-15_6.tif:0005-0380	0.763	148.667	0	475	46.39	27.427	0.89	113.491	21854	1.39	0.719	0.955
658	SCLT1_KAN619-15_6.tif:0006-0429	0.992	81.257	0	400	28.901	30.915	0.928	80.598	15520	1.12	0.893	0.929	0.478614	1.15816	668	CEP170_KAN619-15_6.tif:0006-0429	0.992	169.775	0	823	28.901	30.915	0.928	168.398	32427	1.12	0.893	0.929
659	SCLT1_KAN619-15_6.tif:0007-0616	0.872	21.405	0	103	67.721	44.417	0.851	18.675	3596	1.409	0.71	0.933	0.13742	0.268346	669	CEP170_KAN619-15_6.tif:0007-0616	0.872	155.762	0	517	67.721	44.417	0.851	135.894	26168	1.409	0.71	0.933
660	SCLT1_KAN619-15_6.tif:0008-0917	0.997	14.266	0	137	23.362	66.149	0.891	14.224	2739	1.483	0.674	0.946	0.0882069	0.204394	670	CEP170_KAN619-15_6.tif:0008-0917	0.997	161.729	0	547	23.362	66.149	0.891	161.258	31052	1.483	0.674	0.946
661	SCLT1_KAN619-15_6.tif:0009-1043	0.8	33.578	0	116	87.688	75.202	0.818	26.854	5171	1.655	0.604	0.906	0.292015	0.385878	671	CEP170_KAN619-15_6.tif:0009-1043	0.8	114.987	0	290	87.688	75.202	0.818	91.96	17708	1.655	0.604	0.906
662	SCLT1_KAN619-15_6.tif:0010-1150	0.597	22.991	0	72	10.372	82.85	0.837	13.731	2644	1.527	0.655	0.92	0.20245	0.197304	672	CEP170_KAN619-15_6.tif:0010-1150	0.597	113.565	0	301	10.372	82.85	0.837	67.822	13060	1.527	0.655	0.92
									AVERAGE	9188.57				3.22304	0.685683
									SEM	1108.34
673	SCLT1_KAN619-16_1.tif:0001-0070	0.883	109.971	0	715	86.593	5.064	0.891	97.086	18695	1.265	0.79	0.939	0.983896	1.39509	684	CEP170_KAN619-16_1.tif:0001-0070	0.883	111.771	0	344	86.593	5.064	0.891	98.675	19001	1.265	0.79	0.939
674	SCLT1_KAN619-16_1.tif:0002-0168	0.758	93.185	0	427	83.164	12.13	0.946	70.653	13605	1.132	0.883	0.933	0.694913	1.01525	685	CEP170_KAN619-16_1.tif:0002-0168	0.758	134.096	0	401	83.164	12.13	0.946	101.671	19578	1.132	0.883	0.933
675	SCLT1_KAN619-16_1.tif:0003-0208	0.654	135.27	0	499	3.088	15.065	0.858	88.512	17044	1.556	0.643	0.933	1.39602	1.27188	686	CEP170_KAN619-16_1.tif:0003-0208	0.654	96.897	0	306	3.088	15.065	0.858	63.403	12209	1.556	0.643	0.933
676	SCLT1_KAN619-16_1.tif:0004-0292	0.987	80.879	0	504	64.341	21.069	0.862	79.803	15367	1.331	0.751	0.918	0.799906	1.14674	687	CEP170_KAN619-16_1.tif:0004-0292	0.987	101.111	0	448	64.341	21.069	0.862	99.766	19211	1.331	0.751	0.918
677	SCLT1_KAN619-16_1.tif:0005-0354	1.028	112.843	0	574	82.152	25.52	0.823	116.03	22343	1.663	0.601	0.938	0.880339	1.66731	688	CEP170_KAN619-16_1.tif:0005-0354	1.028	128.182	0	529	82.152	25.52	0.823	131.802	25380	1.663	0.601	0.938
678	SCLT1_KAN619-16_1.tif:0006-0533	0.592	88.912	0	317	30.815	38.405	0.853	52.638	10136	1.463	0.684	0.912	0.856732	0.756384	689	CEP170_KAN619-16_1.tif:0006-0533	0.592	103.781	0	268	30.815	38.405	0.853	61.44	11831	1.463	0.684	0.912
679	SCLT1_KAN619-16_1.tif:0007-0610	0.852	119.726	0	504	56.928	44.008	0.925	101.967	19635	1.196	0.836	0.943	0.840108	1.46523	690	CEP170_KAN619-16_1.tif:0007-0610	0.852	142.512	0	431	56.928	44.008	0.925	121.374	23372	1.196	0.836	0.943
680	SCLT1_KAN619-16_1.tif:0008-0647	1.085	122.282	0	849	76.28	46.622	0.862	132.721	25557	1.384	0.722	0.939	1.10502	1.90715	691	CEP170_KAN619-16_1.tif:0008-0647	1.085	110.66	0	384	76.28	46.622	0.862	120.107	23128	1.384	0.722	0.939
681	SCLT1_KAN619-16_1.tif:0009-0846	1.231	93.519	0	588	45.116	60.989	0.859	115.101	22164	1.356	0.738	0.931	0.628071	1.65395	692	CEP170_KAN619-16_1.tif:0009-0846	1.231	148.899	0	561	45.116	60.989	0.859	183.261	35289	1.356	0.738	0.931
682	SCLT1_KAN619-16_1.tif:0010-1097	0.727	69.036	0	275	56.392	79.04	0.942	50.192	9665	1.192	0.839	0.952	0.558832	0.721236	693	CEP170_KAN619-16_1.tif:0010-1097	0.727	123.536	0	370	56.392	79.04	0.942	89.815	17295	1.192	0.839	0.952
683	SCLT1_KAN619-16_1.tif:0011-1150	0.737	69.282	0	240	40.859	82.887	0.801	51.09	9838	1.584	0.631	0.874	0.611398	0.734146	694	CEP170_KAN619-16_1.tif:0011-1150	0.737	113.317	0	293	40.859	82.887	0.801	83.563	16091	1.584	0.631	0.874
695	SCLT1_KAN619-16_2.tif:0001-0055	1.309	76.841	0	586	84.114	3.933	0.832	100.56	19364	1.323	0.756	0.902	0.757057	1.44501	705	CEP170_KAN619-16_2.tif:0001-0055	1.309	101.5	0	439	84.114	3.933	0.832	132.83	25578	1.323	0.756	0.902
696	SCLT1_KAN619-16_2.tif:0002-0227	0.519	107.97	0	380	55.567	16.41	0.813	56.07	10797	1.368	0.731	0.917	1.65878	0.80571	706	CEP170_KAN619-16_2.tif:0002-0227	0.519	65.09	0	166	55.567	16.41	0.813	33.802	6509	1.368	0.731	0.917
697	SCLT1_KAN619-16_2.tif:0003-0284	0.924	66.022	0	484	52.848	20.517	0.881	61.03	11752	1.433	0.698	0.952	0.615385	0.876975	707	CEP170_KAN619-16_2.tif:0003-0284	0.924	107.287	0	381	52.848	20.517	0.881	99.174	19097	1.433	0.698	0.952
698	SCLT1_KAN619-16_2.tif:0004-0333	0.628	56.694	0	412	91.719	24.016	0.752	35.625	6860	1.406	0.711	0.917	0.490736	0.511917	708	CEP170_KAN619-16_2.tif:0004-0333	0.628	115.529	0	385	91.719	24.016	0.752	72.595	13979	1.406	0.711	0.917
699	SCLT1_KAN619-16_2.tif:0005-0579	0.68	34.489	0	135	21.009	41.758	0.942	23.463	4518	1.088	0.92	0.939	0.261111	0.337149	709	CEP170_KAN619-16_2.tif:0005-0579	0.68	132.084	0	407	21.009	41.758	0.942	89.857	17303	1.088	0.92	0.939
700	SCLT1_KAN619-16_2.tif:0006-0736	1.319	65.811	0	330	72.156	53.05	0.732	86.809	16716	2.054	0.487	0.922	0.500135	1.24741	710	CEP170_KAN619-16_2.tif:0006-0736	1.319	131.587	0	560	72.156	53.05	0.732	173.571	33423	2.054	0.487	0.922
701	SCLT1_KAN619-16_2.tif:0007-0863	1.153	103.73	0	783	55.636	62.231	0.78	119.588	23028	1.67	0.599	0.923	0.645639	1.71843	711	CEP170_KAN619-16_2.tif:0007-0863	1.153	160.662	0	814	55.636	62.231	0.78	185.224	35667	1.67	0.599	0.923
702	SCLT1_KAN619-16_2.tif:0008-0973	0.836	51.342	0	298	21.788	70.156	0.908	42.927	8266	1.095	0.914	0.944	0.344187	0.616838	712	CEP170_KAN619-16_2.tif:0008-0973	0.836	149.168	0	497	21.788	70.156	0.908	124.719	24016	1.095	0.914	0.944
703	SCLT1_KAN619-16_2.tif:0009-1000	0.982	94.587	0	503	63.481	72.082	0.877	92.838	17877	1.272	0.786	0.924	0.546564	1.33404	713	CEP170_KAN619-16_2.tif:0009-1000	0.982	173.058	0	655	63.481	72.082	0.877	169.857	32708	1.272	0.786	0.924
704	SCLT1_KAN619-16_2.tif:0010-1225	1.163	70.987	0	503	74.728	88.359	0.819	82.576	15901	1.717	0.583	0.943	0.486775	1.18659	714	CEP170_KAN619-16_2.tif:0010-1225	1.163	145.83	0	737	74.728	88.359	0.819	169.639	32666	1.717	0.583	0.943
715	SCLT1_KAN619-16_3.tif:0001-0013	0.945	77.341	0	401	91.063	0.964	0.935	73.099	14076	1.136	0.88	0.931	0.540511	1.0504	725	CEP170_KAN619-16_3.tif:0001-0013	0.945	143.088	0	478	91.063	0.964	0.935	135.24	26042	1.136	0.88	0.931
716	SCLT1_KAN619-16_3.tif:0002-0145	0.795	78.118	0	300	54.48	10.447	0.917	62.068	11952	1.247	0.802	0.947	0.623995	0.8919	726	CEP170_KAN619-16_3.tif:0002-0145	0.795	125.19	0	339	54.48	10.447	0.917	99.47	19154	1.247	0.802	0.947
717	SCLT1_KAN619-16_3.tif:0003-0254	0.924	60.118	0	423	67.516	18.358	0.834	55.572	10701	1.162	0.861	0.901	0.643282	0.798546	727	CEP170_KAN619-16_3.tif:0003-0254	0.924	93.455	0	257	67.516	18.358	0.834	86.388	16635	1.162	0.861	0.901
718	SCLT1_KAN619-16_3.tif:0004-0273	0.722	42.317	0	136	20.45	19.693	0.935	30.546	5882	1.403	0.713	0.939	0.346163	0.438935	728	CEP170_KAN619-16_3.tif:0004-0273	0.722	122.245	0	361	20.45	19.693	0.935	88.242	16992	1.403	0.713	0.939
719	SCLT1_KAN619-16_3.tif:0005-0504	0.935	83.378	0	498	28.584	36.399	0.903	77.939	15008	1.382	0.724	0.933	0.635501	1.11995	729	CEP170_KAN619-16_3.tif:0005-0504	0.935	131.2	0	509	28.584	36.399	0.903	122.641	23616	1.382	0.724	0.933
720	SCLT1_KAN619-16_3.tif:0006-0644	0.997	100.286	0	621	37.9	46.416	0.891	99.994	19255	1.241	0.806	0.937	0.7445	1.43687	730	CEP170_KAN619-16_3.tif:0006-0644	0.997	134.703	0	400	37.9	46.416	0.891	134.31	25863	1.241	0.806	0.937
721	SCLT1_KAN619-16_3.tif:0007-0733	1.044	105.726	0	540	68.277	52.838	0.873	110.36	21251	1.433	0.698	0.946	1.01195	1.58582	731	CEP170_KAN619-16_3.tif:0007-0733	1.044	104.478	0	466	68.277	52.838	0.873	109.056	21000	1.433	0.698	0.946
722	SCLT1_KAN619-16_3.tif:0008-0835	0.639	41.073	0	231	26.429	60.193	0.906	26.236	5052	1.184	0.845	0.976	0.316601	0.376998	732	CEP170_KAN619-16_3.tif:0008-0835	0.639	129.732	0	376	26.429	60.193	0.906	82.867	15957	1.184	0.845	0.976
723	SCLT1_KAN619-16_3.tif:0009-0948	0.717	84.696	0	336	21.914	68.263	0.88	60.698	11688	1.177	0.85	0.926	1.10056	0.872199	733	CEP170_KAN619-16_3.tif:0009-0948	0.717	76.957	0	224	21.914	68.263	0.88	55.151	10620	1.177	0.85	0.926
724	SCLT1_KAN619-16_3.tif:0010-0971	0.561	39.185	0	178	48.649	69.979	0.962	21.977	4232	1.206	0.829	0.96	0.347998	0.315807	734	CEP170_KAN619-16_3.tif:0010-0971	0.561	112.602	0	253	48.649	69.979	0.962	63.154	12161	1.206	0.829	0.96
735	SCLT1_KAN619-16_4.tif:0001-0110	0.862	49.343	0	200	21.382	7.912	0.882	42.537	8191	1.487	0.672	0.933	0.345597	0.611241	744	CEP170_KAN619-16_4.tif:0001-0110	0.862	142.777	0	392	21.382	7.912	0.882	123.083	23701	1.487	0.672	0.933
736	SCLT1_KAN619-16_4.tif:0002-0175	0.852	82.274	0	299	38.088	12.631	0.902	70.071	13493	1.146	0.872	0.94	0.55724	1.00689	745	CEP170_KAN619-16_4.tif:0002-0175	0.852	147.646	0	493	38.088	12.631	0.902	125.747	24214	1.146	0.872	0.94
737	SCLT1_KAN619-16_4.tif:0003-0285	1.106	62.859	0	472	74.682	20.552	0.845	69.531	13389	1.145	0.874	0.897	0.571203	0.999134	746	CEP170_KAN619-16_4.tif:0003-0285	1.106	110.047	0	390	74.682	20.552	0.845	121.727	23440	1.145	0.874	0.897
738	SCLT1_KAN619-16_4.tif:0004-0640	1.075	66.097	0	407	13.072	46.057	0.818	71.053	13682	1.39	0.719	0.937	0.627241	1.021	747	CEP170_KAN619-16_4.tif:0004-0640	1.075	105.377	0	328	13.072	46.057	0.818	113.278	21813	1.39	0.719	0.937
739	SCLT1_KAN619-16_4.tif:0005-0779	0.628	54.264	0	183	57.688	56.134	0.906	34.098	6566	1.138	0.879	0.927	0.458264	0.489978	748	CEP170_KAN619-16_4.tif:0005-0779	0.628	118.413	0	308	57.688	56.134	0.906	74.407	14328	1.138	0.879	0.927
740	SCLT1_KAN619-16_4.tif:0006-0823	0.976	99.707	0	504	72.713	59.284	0.88	97.346	18745	1.128	0.887	0.945	0.517861	1.39882	749	CEP170_KAN619-16_4.tif:0006-0823	0.976	192.537	0	725	72.713	59.284	0.88	187.976	36197	1.128	0.887	0.945
741	SCLT1_KAN619-16_4.tif:0007-0907	0.587	106.708	0	385	25.02	65.378	0.935	62.619	12058	1.31	0.764	0.95	1.1199	0.89981	750	CEP170_KAN619-16_4.tif:0007-0907	0.587	95.283	0	285	25.02	65.378	0.935	55.915	10767	1.31	0.764	0.95
742	SCLT1_KAN619-16_4.tif:0008-1028	1.096	119.27	0	759	22.94	74.113	0.862	130.691	25166	1.261	0.793	0.915	0.994861	1.87797	751	CEP170_KAN619-16_4.tif:0008-1028	1.096	119.886	0	478	22.94	74.113	0.862	131.366	25296	1.261	0.793	0.915
743	SCLT1_KAN619-16_4.tif:0009-1096	0.784	71.974	0	381	46.521	79.005	0.905	56.439	10868	1.12	0.893	0.929	0.506171	0.811008	752	CEP170_KAN619-16_4.tif:0009-1096	0.784	142.192	0	565	46.521	79.005	0.905	111.502	21471	1.12	0.893	0.929
753	SCLT1_KAN619-16_5.tif:0001-0110	0.732	90.929	0	381	0.61	7.936	0.886	66.581	12821	1.32	0.758	0.959	0.72024	0.956748	766	CEP170_KAN619-16_5.tif:0001-0110	0.732	126.248	0	422	0.61	7.936	0.886	92.443	17801	1.32	0.758	0.959
754	SCLT1_KAN619-16_5.tif:0002-0151	0.737	19.528	0	138	49.448	10.903	0.956	14.401	2773	1.243	0.805	0.947	0.138796	0.206931	767	CEP170_KAN619-16_5.tif:0002-0151	0.737	140.697	0	458	49.448	10.903	0.956	103.754	19979	1.243	0.805	0.947
755	SCLT1_KAN619-16_5.tif:0003-0168	0.753	33.448	0	192	69.079	12.137	0.901	25.187	4850	1.176	0.851	0.945	0.219696	0.361924	768	CEP170_KAN619-16_5.tif:0003-0168	0.753	152.248	0	531	69.079	12.137	0.901	114.644	22076	1.176	0.851	0.945
756	SCLT1_KAN619-16_5.tif:0004-0257	0.743	14.441	0	72	80.962	18.552	0.912	10.724	2065	1.41	0.709	0.947	0.0969939	0.154097	769	CEP170_KAN619-16_5.tif:0004-0257	0.743	148.881	0	500	80.962	18.552	0.912	110.562	21290	1.41	0.709	0.947
757	SCLT1_KAN619-16_5.tif:0005-0542	0.836	87.77	0	452	1.019	39.147	0.816	73.384	14131	1.191	0.839	0.892	0.941376	1.0545	770	CEP170_KAN619-16_5.tif:0005-0542	0.836	93.236	0	276	1.019	39.147	0.816	77.954	15011	1.191	0.839	0.892
758	SCLT1_KAN619-16_5.tif:0006-0586	0.737	118.606	0	634	55.722	42.238	0.966	87.463	16842	1.092	0.916	0.966	0.999644	1.25681	771	CEP170_KAN619-16_5.tif:0006-0586	0.737	118.648	0	336	55.722	42.238	0.966	87.494	16848	1.092	0.916	0.966
759	SCLT1_KAN619-16_5.tif:0007-0616	0.992	68.518	0	627	30.608	44.423	0.755	67.963	13087	1.729	0.578	0.895	0.76919	0.976597	772	CEP170_KAN619-16_5.tif:0007-0616	0.992	89.079	0	373	30.608	44.423	0.755	88.356	17014	1.729	0.578	0.895
760	SCLT1_KAN619-16_5.tif:0008-0618	1.065	113.99	0	728	81.799	44.572	0.89	121.353	23368	1.191	0.839	0.94	0.851169	1.7438	773	CEP170_KAN619-16_5.tif:0008-0618	1.065	133.922	0	560	81.799	44.572	0.89	142.573	27454	1.191	0.839	0.94
761	SCLT1_KAN619-16_5.tif:0009-0754	0.634	83.369	0	424	66.358	54.372	0.853	52.819	10171	1.612	0.62	0.914	0.762101	0.758995	774	CEP170_KAN619-16_5.tif:0009-0754	0.634	109.393	0	273	66.358	54.372	0.853	69.308	13346	1.612	0.62	0.914
762	SCLT1_KAN619-16_5.tif:0010-1023	1.257	81.149	0	597	24.559	73.687	0.827	101.983	19638	1.581	0.632	0.931	0.61621	1.46546	775	CEP170_KAN619-16_5.tif:0010-1023	1.257	131.69	0	524	24.559	73.687	0.827	165.5	31869	1.581	0.632	0.931
763	SCLT1_KAN619-16_5.tif:0011-1053	1.2	76.091	0	497	87.722	75.935	0.734	91.28	17577	1.984	0.504	0.887	0.689916	1.31166	776	CEP170_KAN619-16_5.tif:0011-1053	1.2	110.29	0	301	87.722	75.935	0.734	132.306	25477	1.984	0.504	0.887
764	SCLT1_KAN619-16_5.tif:0012-1075	0.997	104.328	0	714	62.119	77.536	0.849	104.024	20031	1.276	0.784	0.962	1.58135	1.49478	777	CEP170_KAN619-16_5.tif:0012-1075	0.997	65.974	0	278	62.119	77.536	0.849	65.782	12667	1.276	0.784	0.962
765	SCLT1_KAN619-16_5.tif:0013-1212	0.623	28.425	0	135	44.612	87.396	0.888	17.714	3411	1.438	0.695	0.916	0.262506	0.254541	778	CEP170_KAN619-16_5.tif:0013-1212	0.623	108.283	0	279	44.612	87.396	0.888	67.48	12994	1.438	0.695	0.916
779	SCLT1_KAN619-16_6.tif:0001-0047	0.55	33.547	0	110	46.741	3.372	0.944	18.467	3556	1.231	0.812	0.951	0.315388	0.265361	790	CEP170_KAN619-16_6.tif:0001-0047	0.55	106.368	0	262	46.741	3.372	0.944	58.553	11275	1.231	0.812	0.951
780	SCLT1_KAN619-16_6.tif:0002-0154	1.21	113.837	0	907	40.243	11.115	0.822	137.743	26524	1.364	0.733	0.891	1.1867	1.97931	791	CEP170_KAN619-16_6.tif:0002-0154	1.21	95.927	0	447	40.243	11.115	0.822	116.072	22351	1.364	0.733	0.891
781	SCLT1_KAN619-16_6.tif:0003-0525	1.096	94.929	0	662	38.377	37.839	0.881	104.019	20030	1.548	0.646	0.94	1.08393	1.49471	792	CEP170_KAN619-16_6.tif:0003-0525	1.096	87.578	0	348	38.377	37.839	0.881	95.964	18479	1.548	0.646	0.94
782	SCLT1_KAN619-16_6.tif:0004-0523	0.737	44.155	0	261	8.51	37.662	0.93	32.561	6270	1.222	0.818	0.947	0.333848	0.467889	793	CEP170_KAN619-16_6.tif:0004-0523	0.737	132.261	0	312	8.51	37.662	0.93	97.532	18781	1.222	0.818	0.947
783	SCLT1_KAN619-16_6.tif:0005-0644	0.836	91.28	0	346	27.796	46.431	0.969	76.318	14696	1.201	0.833	0.931	0.727345	1.09667	794	CEP170_KAN619-16_6.tif:0005-0644	0.836	125.497	0	379	27.796	46.431	0.969	104.928	20205	1.201	0.833	0.931
784	SCLT1_KAN619-16_6.tif:0006-0759	1.267	64.639	0	476	47.306	54.69	0.742	81.906	15772	1.889	0.529	0.887	0.589431	1.17696	795	CEP170_KAN619-16_6.tif:0006-0759	1.267	109.664	0	470	47.306	54.69	0.742	138.958	26758	1.889	0.529	0.887
785	SCLT1_KAN619-16_6.tif:0007-0948	1.132	94.61	0	669	69.146	68.282	0.837	107.109	20625	1.519	0.659	0.938	0.921499	1.53911	796	CEP170_KAN619-16_6.tif:0007-0948	1.132	102.67	0	374	69.146	68.282	0.837	116.233	22382	1.519	0.659	0.938
786	SCLT1_KAN619-16_6.tif:0008-1007	0.592	29.088	0	151	81.784	72.581	0.853	17.22	3316	1.638	0.611	0.919	0.281065	0.247451	797	CEP170_KAN619-16_6.tif:0008-1007	0.592	103.491	0	219	81.784	72.581	0.853	61.269	11798	1.638	0.611	0.919
787	SCLT1_KAN619-16_6.tif:0009-1131	0.722	23.813	0	122	70.326	81.491	0.82	17.189	3310	1.377	0.726	0.939	0.187238	0.247004	798	CEP170_KAN619-16_6.tif:0009-1131	0.722	127.18	0	408	70.326	81.491	0.82	91.804	17678	1.377	0.726	0.939
788	SCLT1_KAN619-16_6.tif:0010-1257	1.018	82.179	0	593	20.134	90.599	0.889	83.646	16107	1.15	0.869	0.929	0.77527	1.20196	799	CEP170_KAN619-16_6.tif:0010-1257	1.018	106	0	412	20.134	90.599	0.889	107.893	20776	1.15	0.869	0.929
789	SCLT1_KAN619-16_6.tif:0011-1263	0.81	40.288	0	178	80.025	91.038	0.79	32.639	6285	1.481	0.675	0.872	0.3298	0.469009	800	CEP170_KAN619-16_6.tif:0011-1263	0.81	122.16	0	327	80.025	91.038	0.79	98.966	19057	1.481	0.675	0.872
										13400.6				0.672683	1

## Sheet: IF condition
Exp. number	Cell line	Gene induced	Culture condition, fixation condition	rabbit-Alexa488	mouse IgG1-Alexa568	mouse IgG2b-Alexa647	Nuclear stain	Date	Replicate
KAN619-1	RPE-BFP-Cas9 pMCB306 (pool)		Serum starved for 24 hours. Fixed in 100% methanol at -20C for 5 minutes.	SCLT1, HPA036561, SIGMA, 1:500	CEP170, Invitrogen, 41-3200, 1:1000	Ac-Tub, 6B-11, Santa Cruz, 1:1000	DAPI	No.6	2021-03-04
KAN619-2	RPE-BFP-Cas9 CEP164KO (pool)		Serum starved for 24 hours. Fixed in 100% methanol at -20C for 5 minutes.	SCLT1, HPA036561, SIGMA, 1:500	CEP170, Invitrogen, 41-3200, 1:1000	Ac-Tub, 6B-11, Santa Cruz, 1:1000	DAPI	No.6	2021-03-04
KAN619-3	RPE-BFP-Cas9 CEP83 KO (pool)		Serum starved for 24 hours. Fixed in 100% methanol at -20C for 5 minutes.	SCLT1, HPA036561, SIGMA, 1:500	CEP170, Invitrogen, 41-3200, 1:1000	Ac-Tub, 6B-11, Santa Cruz, 1:1000	DAPI	No.6	2021-03-04
KAN619-4	RPE-BFP-Cas9 SCLT1 KO (pool)		Serum starved for 24 hours. Fixed in 100% methanol at -20C for 5 minutes.	SCLT1, HPA036561, SIGMA, 1:500	CEP170, Invitrogen, 41-3200, 1:1000	Ac-Tub, 6B-11, Santa Cruz, 1:1000	DAPI	No.6	2021-03-04
KAN619-5	RPE-BFP-Cas9 FBF1 KO (pool)		Serum starved for 24 hours. Fixed in 100% methanol at -20C for 5 minutes.	SCLT1, HPA036561, SIGMA, 1:500	CEP170, Invitrogen, 41-3200, 1:1000	Ac-Tub, 6B-11, Santa Cruz, 1:1000	DAPI	No.6	2021-03-04
KAN619-6	RPE-BFP-Cas9 CEP89KO (pool)		Serum starved for 24 hours. Fixed in 100% methanol at -20C for 5 minutes.	SCLT1, HPA036561, SIGMA, 1:500	CEP170, Invitrogen, 41-3200, 1:1000	Ac-Tub, 6B-11, Santa Cruz, 1:1000	DAPI	No.6	2021-03-04
KAN619-7	RPE-BFP-Cas9 CCDC92 KO (pool)		Serum starved for 24 hours. Fixed in 100% methanol at -20C for 5 minutes.	SCLT1, HPA036561, SIGMA, 1:500	CEP170, Invitrogen, 41-3200, 1:1000	Ac-Tub, 6B-11, Santa Cruz, 1:1000	DAPI	No.6	2021-03-04
KAN619-8	RPE-BFP-Cas9 ANKRD26 KO (pool)		Serum starved for 24 hours. Fixed in 100% methanol at -20C for 5 minutes.	SCLT1, HPA036561, SIGMA, 1:500	CEP170, Invitrogen, 41-3200, 1:1000	Ac-Tub, 6B-11, Santa Cruz, 1:1000	DAPI	No.6	2021-03-04
KAN619-9	RPE-BFP-Cas9 TTBK2 KO (pool)		Serum starved for 24 hours. Fixed in 100% methanol at -20C for 5 minutes.	SCLT1, HPA036561, SIGMA, 1:500	CEP170, Invitrogen, 41-3200, 1:1000	Ac-Tub, 6B-11, Santa Cruz, 1:1000	DAPI	No.6	2021-03-04
KAN619-10	RPE-BFP-Cas9 INPP5E KO (pool)		Serum starved for 24 hours. Fixed in 100% methanol at -20C for 5 minutes.	SCLT1, HPA036561, SIGMA, 1:500	CEP170, Invitrogen, 41-3200, 1:1000	Ac-Tub, 6B-11, Santa Cruz, 1:1000	DAPI	No.6	2021-03-04
KAN619-11	RPE-BFP-Cas9 Kiz KO (pool)		Serum starved for 24 hours. Fixed in 100% methanol at -20C for 5 minutes.	SCLT1, HPA036561, SIGMA, 1:500	CEP170, Invitrogen, 41-3200, 1:1000	Ac-Tub, 6B-11, Santa Cruz, 1:1000	DAPI	No.6	2021-03-04
KAN619-12	RPE-BFP-Cas9 LRRC45 KO (pool)		Serum starved for 24 hours. Fixed in 100% methanol at -20C for 5 minutes.	SCLT1, HPA036561, SIGMA, 1:500	CEP170, Invitrogen, 41-3200, 1:1000	Ac-Tub, 6B-11, Santa Cruz, 1:1000	DAPI	No.6	2021-03-04
KAN619-13	RPE-BFP-Cas9 NCS1 KO (pool)		Serum starved for 24 hours. Fixed in 100% methanol at -20C for 5 minutes.	SCLT1, HPA036561, SIGMA, 1:500	CEP170, Invitrogen, 41-3200, 1:1000	Ac-Tub, 6B-11, Santa Cruz, 1:1000	DAPI	No.6	2021-03-04
KAN619-14	RPE-BFP-Cas9 C3orf14 KO (pool)		Serum starved for 24 hours. Fixed in 100% methanol at -20C for 5 minutes.	SCLT1, HPA036561, SIGMA, 1:500	CEP170, Invitrogen, 41-3200, 1:1000	Ac-Tub, 6B-11, Santa Cruz, 1:1000	DAPI	No.6	2021-03-04
KAN619-15	RPE-BFP-Cas9 FOP KO (pool)		Serum starved for 24 hours. Fixed in 100% methanol at -20C for 5 minutes.	SCLT1, HPA036561, SIGMA, 1:500	CEP170, Invitrogen, 41-3200, 1:1000	Ac-Tub, 6B-11, Santa Cruz, 1:1000	DAPI	No.6	2021-03-04
KAN619-16	RPE-BFP-Cas9 sgSafe (pool)		Serum starved for 24 hours. Fixed in 100% methanol at -20C for 5 minutes.	SCLT1, HPA036561, SIGMA, 1:500	CEP170, Invitrogen, 41-3200, 1:1000	Ac-Tub, 6B-11, Santa Cruz, 1:1000	DAPI	No.6	2021-03-04
