# Supplementary material for: A hierarchical pathway for assembly of the distal appendages that organize primary cilia
Source: eLife. 2025 Jan 30;14:e85999. doi: 10.7554/eLife.85999 (PMC11984956; doi:10.7554/eLife.85999)
Supplement: Figure 2—source data 5. [file elife-85999-fig2-data5.xlsx]

## Sheet: Raw data
		Label	Area	Mean	Min	Max	X	Y	Circ	IntDen	RawIntDen	AR	Round	Noramlized Intensity
351	SCLT1_KAN621-1_1.tif:0001-0041	1.189	176.55	0	1003	33.803	2.972	0.928	209.959	40430	1.154	0.867	0.929	1.66823
352	SCLT1_KAN621-1_1.tif:0002-0133	1.153	139.315	0	886	26.808	9.59	0.915	160.614	30928	1.058	0.946	0.951	1.27616
353	SCLT1_KAN621-1_1.tif:0003-0229	1.371	122.523	0	852	62.772	16.487	0.862	167.978	32346	1.349	0.742	0.928	1.33467
354	SCLT1_KAN621-1_1.tif:0004-0374	1.028	65.631	0	338	12.504	26.976	0.739	67.485	12995	1.753	0.571	0.874	0.536203
355	SCLT1_KAN621-1_1.tif:0005-0542	1.153	175.766	0	1375	78.755	39.073	0.86	202.637	39020	1.207	0.828	0.949	1.61005
356	SCLT1_KAN621-1_1.tif:0006-0628	0.956	60.31	0	389	25.575	45.272	0.843	57.628	11097	1.172	0.853	0.929	0.457888
357	SCLT1_KAN621-1_1.tif:0007-0646	1.376	101.596	0	735	46.89	46.576	0.821	139.815	26923	1.413	0.708	0.897	1.1109
358	SCLT1_KAN621-1_1.tif:0008-0900	1.096	188.91	0	1064	51.73	64.88	0.87	206.999	39860	1.17	0.855	0.93	1.64471
359	SCLT1_KAN621-1_2.tif:0001-0139	1.677	121.675	0	1148	73.985	10.016	0.782	204.096	39301	1.679	0.596	0.912	1.62165
360	SCLT1_KAN621-1_2.tif:0002-0403	1.018	100.541	0	728	35.771	29.061	0.825	102.336	19706	1.376	0.727	0.914	0.813115
361	SCLT1_KAN621-1_2.tif:0003-0456	1.091	158.343	0	900	43.42	32.808	0.823	172.683	33252	1.37	0.73	0.897	1.37205
362	SCLT1_KAN621-1_2.tif:0004-0774	1.215	85.902	0	639	85.318	55.789	0.825	104.387	20101	1.353	0.739	0.897	0.829413
363	SCLT1_KAN621-1_2.tif:0005-0823	0.628	55.752	0	243	41.878	59.314	0.96	35.033	6746	1.052	0.951	0.942	0.278355
364	SCLT1_KAN621-1_2.tif:0006-0959	1.184	127.64	0	812	80.524	69.073	0.827	151.131	29102	1.497	0.668	0.908	1.20081
365	SCLT1_KAN621-1_3.tif:0001-0182	1.049	198.084	0	1043	86.39	13.127	0.959	207.793	40013	1.106	0.904	0.948	1.65103
366	SCLT1_KAN621-1_3.tif:0002-0196	0.94	84.873	0	455	69.817	14.138	0.829	79.777	15362	1.354	0.738	0.907	0.633871
367	SCLT1_KAN621-1_3.tif:0003-0242	1.324	106.533	0	765	26.869	17.471	0.748	141.077	27166	1.79	0.559	0.89	1.12093
368	SCLT1_KAN621-1_3.tif:0004-0670	0.846	178.798	0	827	46.832	48.322	0.942	151.349	29144	1.176	0.851	0.948	1.20255
369	SCLT1_KAN621-1_3.tif:0005-0705	0.971	115.021	0	588	64.398	50.783	0.896	111.699	21509	1.136	0.88	0.928	0.88751
370	SCLT1_KAN621-1_3.tif:0006-0862	1.22	100.468	0	785	62.511	62.164	0.733	122.61	23610	1.839	0.544	0.864	0.974203
371	SCLT1_KAN621-1_4.tif:0001-0039	0.893	134.035	0	653	56.062	2.819	0.892	119.723	23054	1.48	0.676	0.942	0.951261
372	SCLT1_KAN621-1_4.tif:0002-0408	0.795	91.627	0	515	50.485	29.454	0.802	72.803	14019	1.468	0.681	0.9	0.578456
373	SCLT1_KAN621-1_4.tif:0003-0417	0.945	156.401	0	776	59.196	30.069	0.901	147.823	28465	1.17	0.855	0.945	1.17453
374	SCLT1_KAN621-1_4.tif:0004-0474	1.137	149.662	0	951	88.086	34.206	0.876	170.211	32776	1.12	0.893	0.924	1.35241
375	SCLT1_KAN621-1_4.tif:0005-0493	0.701	65.459	0	292	76.76	35.555	0.848	45.892	8837	1.627	0.615	0.954	0.364635
376	SCLT1_KAN621-1_4.tif:0006-0631	0.898	133.549	0	687	14.017	45.493	0.868	119.982	23104	1.333	0.75	0.913	0.953324
377	SCLT1_KAN621-1_4.tif:0007-0637	1.174	111.606	0	672	62.994	45.988	0.81	130.987	25223	1.542	0.649	0.911	1.04076
378	SCLT1_KAN621-1_4.tif:0008-0884	0.55	72.151	0	257	19.376	63.711	0.916	39.717	7648	1.24	0.806	0.951	0.315574
379	SCLT1_KAN621-1_4.tif:0009-0950	1.059	149.789	0	748	57.61	68.495	0.905	158.687	30557	1.395	0.717	0.958	1.26085
380	SCLT1_KAN621-1_5.tif:0001-0207	0.95	141.557	0	978	65.869	14.902	0.857	134.528	25905	1.151	0.869	0.931	1.0689
381	SCLT1_KAN621-1_5.tif:0002-0216	1.168	117.267	0	871	46.255	15.616	0.839	137.021	26385	1.217	0.821	0.913	1.08871
382	SCLT1_KAN621-1_5.tif:0003-0248	1.361	107.389	0	904	26.89	17.873	0.755	146.114	28136	1.907	0.524	0.918	1.16096
383	SCLT1_KAN621-1_5.tif:0004-0649	1.174	129.553	0	704	24.783	46.709	0.801	152.05	29279	1.493	0.67	0.934	1.20812
384	SCLT1_KAN621-1_5.tif:0005-0818	1.132	98.482	0	615	64.621	58.952	0.847	111.492	21469	1.202	0.832	0.895	0.88586
385	SCLT1_KAN621-1_5.tif:0006-0848	0.696	119.597	0	517	12.25	61.137	0.888	83.225	16026	1.312	0.762	0.947	0.661269
386	SCLT1_KAN621-1_5.tif:0007-0979	0.966	120.995	0	689	41.208	70.559	0.883	116.872	22505	1.163	0.86	0.919	0.928608
387	SCLT1_KAN621-1_6.tif:0001-0125	1.163	193.036	0	1316	76.963	8.986	0.836	224.552	43240	1.307	0.765	0.903	1.78418
388	SCLT1_KAN621-1_6.tif:0002-0177	1.174	125.327	0	794	7.248	12.764	0.878	147.091	28324	1.149	0.87	0.915	1.16871
389	SCLT1_KAN621-1_6.tif:0003-0334	0.95	107.519	0	544	57.581	24.083	0.838	102.18	19676	1.567	0.638	0.936	0.811877
390	SCLT1_KAN621-1_6.tif:0004-0546	1.044	148.726	0	934	55.63	39.382	0.818	155.244	29894	1.268	0.788	0.92	1.23349
391	SCLT1_KAN621-1_6.tif:0005-0779	1.137	142.073	0	843	33.322	56.213	0.858	161.58	31114	1.266	0.79	0.926	1.28383
392	SCLT1_KAN621-1_6.tif:0006-0947	0.556	23.477	0	91	68.571	68.257	0.859	13.045	2512	1.414	0.707	0.915	0.103651
									AVERAGE	25160.9				1.0382
									SEM	1519.61
393	SCLT1_KAN621-2_1.tif:0001-0031	0.592	6.482	0	47	5.414	2.253	0.916	3.838	739	1.155	0.866	0.938	0.0304928
394	SCLT1_KAN621-2_1.tif:0002-0105	0.592	11.561	0	72	68.661	7.565	0.943	6.845	1318	1.305	0.766	0.946	0.0543837
395	SCLT1_KAN621-2_1.tif:0003-0204	1.392	71.06	0	485	23.038	14.761	0.806	98.898	19044	1.43	0.699	0.908	0.785799
396	SCLT1_KAN621-2_1.tif:0004-0274	1.439	165.812	0	1305	79.025	19.677	0.693	238.521	45930	1.602	0.624	0.866	1.89518
397	SCLT1_KAN621-2_1.tif:0005-0355	1.236	113.445	0	942	80.605	25.596	0.716	140.215	27000	1.8	0.555	0.856	1.11408
398	SCLT1_KAN621-2_1.tif:0006-0418	1.018	79.816	0	455	5.074	30.155	0.851	81.242	15644	1.455	0.687	0.929	0.645507
399	SCLT1_KAN621-2_1.tif:0007-0675	0.67	60.318	0	244	11.786	48.652	0.928	40.408	7781	1.192	0.839	0.931	0.321062
400	SCLT1_KAN621-2_1.tif:0008-0866	1.35	69.712	0	872	69.178	62.411	0.744	94.126	18125	1.911	0.523	0.887	0.747879
401	SCLT1_KAN621-2_1.tif:0009-1005	0.898	16.301	0	146	64.487	72.469	0.898	14.645	2820	1.081	0.925	0.935	0.11636
402	SCLT1_KAN621-2_2.tif:0001-0162	0.722	181.899	0	898	74.738	11.708	0.921	131.304	25284	1.269	0.788	0.962	1.04328
403	SCLT1_KAN621-2_2.tif:0002-0190	1.288	94.988	0	665	17.214	13.703	0.834	122.335	23557	1.425	0.702	0.913	0.972016
404	SCLT1_KAN621-2_2.tif:0003-0433	0.982	75.381	0	581	48.621	31.217	0.858	73.987	14247	1.546	0.647	0.938	0.587864
405	SCLT1_KAN621-2_2.tif:0004-0439	0.743	30.916	0	156	82.778	31.644	0.937	22.959	4421	1.208	0.828	0.944	0.182421
406	SCLT1_KAN621-2_2.tif:0005-0609	1.049	12.084	0	53	85.571	43.891	0.825	12.676	2441	1.605	0.623	0.904	0.100721
407	SCLT1_KAN621-2_2.tif:0006-0743	0.935	177.961	0	708	38.552	53.566	0.957	166.352	32033	1.134	0.882	0.95	1.32175
408	SCLT1_KAN621-2_2.tif:0007-0825	0.919	129.927	0	766	72.458	59.455	0.897	119.427	22997	1.319	0.758	0.944	0.948909
409	SCLT1_KAN621-2_3.tif:0001-0200	0.94	31.061	0	238	60.694	14.382	0.887	29.196	5622	1.205	0.83	0.923	0.231977
410	SCLT1_KAN621-2_3.tif:0002-0344	1.262	215.835	0	1423	86.389	24.818	0.824	272.37	52448	1.228	0.814	0.908	2.16412
411	SCLT1_KAN621-2_3.tif:0003-0376	0.8	41.812	0	175	8.392	27.105	0.947	33.439	6439	1.285	0.778	0.945	0.265688
412	SCLT1_KAN621-2_3.tif:0004-0397	1.309	147.437	0	1005	61.8	28.653	0.845	192.946	37154	1.49	0.671	0.932	1.53306
413	SCLT1_KAN621-2_3.tif:0005-0571	1.148	46.538	0	396	67.716	41.107	0.795	53.412	10285	1.878	0.532	0.913	0.424383
414	SCLT1_KAN621-2_3.tif:0006-0628	1.329	152.938	0	1246	73.761	45.334	0.836	203.322	39152	1.556	0.643	0.921	1.6155
415	SCLT1_KAN621-2_3.tif:0007-0645	1.522	74.679	0	657	13.209	46.429	0.795	113.631	21881	1.835	0.545	0.942	0.90286
416	SCLT1_KAN621-2_3.tif:0008-0953	0.789	247.697	0	880	91.606	68.655	0.944	195.522	37650	1.152	0.868	0.965	1.55352
417	SCLT1_KAN621-2_4.tif:0001-0122	1.018	99.52	0	395	13.587	8.796	0.825	101.298	19506	1.51	0.662	0.905	0.804862
418	SCLT1_KAN621-2_4.tif:0002-0232	1.454	124.518	0	816	63.476	16.742	0.874	181.059	34865	1.574	0.635	0.946	1.43861
419	SCLT1_KAN621-2_4.tif:0003-0281	0.8	130.214	0	811	28.388	20.255	0.847	104.138	20053	1.322	0.756	0.909	0.827433
420	SCLT1_KAN621-2_4.tif:0004-0589	1.033	117.643	0	504	67.195	42.526	0.796	121.577	23411	1.61	0.621	0.902	0.965991
421	SCLT1_KAN621-2_4.tif:0005-0643	1.153	108.239	0	623	55.662	46.316	0.87	124.786	24029	1.455	0.687	0.929	0.991491
422	SCLT1_KAN621-2_4.tif:0006-0808	1.013	6.754	0	41	23.995	58.257	0.888	6.839	1317	1.159	0.863	0.897	0.0543424
423	SCLT1_KAN621-2_5.tif:0001-0056	0.779	44.94	0	275	61.272	4.012	0.876	35.007	6741	1.506	0.664	0.94	0.278149
424	SCLT1_KAN621-2_5.tif:0002-0068	0.696	87.403	0	390	18.182	4.939	0.719	60.822	11712	2.265	0.442	0.89	0.483264
425	SCLT1_KAN621-2_5.tif:0003-0091	1.168	211.218	0	1500	84.488	6.611	0.839	246.799	47524	1.36	0.735	0.922	1.96095
426	SCLT1_KAN621-2_5.tif:0004-0421	0.966	82.134	0	373	50.582	30.363	0.883	79.336	15277	1.387	0.721	0.925	0.630364
427	SCLT1_KAN621-2_5.tif:0005-0570	1.22	99.719	0	534	66.882	41.082	0.813	121.696	23434	1.391	0.719	0.89	0.96694
428	SCLT1_KAN621-2_5.tif:0006-0908	0.904	100.374	0	415	13.035	65.399	0.882	90.698	17465	1.15	0.87	0.93	0.720646
429	SCLT1_KAN621-2_6.tif:0001-0113	1.194	82.339	0	498	9.894	8.172	0.771	98.348	18938	1.959	0.51	0.924	0.781425
430	SCLT1_KAN621-2_6.tif:0002-0394	1.215	110.047	0	653	84.686	28.463	0.848	133.729	25751	1.215	0.823	0.916	1.06255
431	SCLT1_KAN621-2_6.tif:0003-0454	0.945	69.571	0	514	45.347	32.716	0.837	65.756	12662	1.369	0.731	0.886	0.522463
432	SCLT1_KAN621-2_6.tif:0004-0489	0.821	156.108	0	600	5.607	35.262	0.947	128.089	24665	1.264	0.791	0.96	1.01773
433	SCLT1_KAN621-2_6.tif:0005-0537	0.966	162.296	0	909	75.087	38.719	0.956	156.766	30187	1.3	0.769	0.951	1.24558
434	SCLT1_KAN621-2_6.tif:0006-0763	0.966	63.737	0	426	31.269	54.993	0.714	61.565	11855	1.291	0.774	0.83	0.489164
435	SCLT1_KAN621-2_6.tif:0007-0796	1.371	142.042	0	1186	61.721	57.389	0.852	194.738	37499	1.671	0.598	0.974	1.54729
436	SCLT1_KAN621-2_6.tif:0008-0983	1.324	87.753	0	579	84.139	70.791	0.835	116.207	22377	1.629	0.614	0.912	0.923326
									AVERAGE	21457.7				0.885393
									SEM	1961.44
437	SCLT1_KAN621-3_1.tif:0001-0075	0.789	7.033	0	43	78.074	5.383	0.836	5.551	1069	1.498	0.668	0.907	0.0441094
438	SCLT1_KAN621-3_1.tif:0002-0187	0.54	6.269	0	23	27.607	13.435	0.748	3.386	652	1.712	0.584	0.825	0.026903
439	SCLT1_KAN621-3_1.tif:0003-0204	1.205	8.918	0	42	72.563	14.718	0.778	10.745	2069	1.44	0.695	0.912	0.0853717
440	SCLT1_KAN621-3_1.tif:0004-0212	0.66	8.803	0	42	39.639	15.297	0.81	5.806	1118	1.37	0.73	0.888	0.0461312
441	SCLT1_KAN621-3_1.tif:0005-0237	0.914	12.915	0	95	36.097	17.073	0.913	11.804	2273	1.137	0.88	0.941	0.0937892
442	SCLT1_KAN621-3_1.tif:0006-0389	1.054	9.059	0	62	48.674	28.056	0.855	9.55	1839	1.674	0.597	0.938	0.0758813
443	SCLT1_KAN621-3_1.tif:0007-0406	0.717	8.29	0	47	30.835	29.258	0.871	5.941	1144	1.199	0.834	0.899	0.0472041
444	SCLT1_KAN621-3_1.tif:0008-0451	0.748	24.778	0	101	76.51	32.542	0.919	18.529	3568	1.114	0.898	0.938	0.147224
445	SCLT1_KAN621-3_1.tif:0009-0605	0.81	8.647	0	46	90.366	43.632	0.867	7.006	1349	1.476	0.678	0.951	0.0556628
446	SCLT1_KAN621-3_1.tif:0010-0640	0.966	11.935	0	81	19.75	46.108	0.863	11.529	2220	1.388	0.721	0.923	0.0916023
447	SCLT1_KAN621-3_1.tif:0011-0735	0.789	18.914	0	94	59.496	52.996	0.869	14.93	2875	1.33	0.752	0.891	0.118629
448	SCLT1_KAN621-3_1.tif:0012-0843	0.846	21.926	0	80	14.606	60.806	0.897	18.56	3574	1.301	0.768	0.945	0.147471
449	SCLT1_KAN621-3_1.tif:0013-0954	0.602	6.155	0	27	61.809	68.705	0.92	3.708	714	1.061	0.942	0.921	0.0294613
450	SCLT1_KAN621-3_2.tif:0001-0059	1.153	13.468	0	71	17.736	4.195	0.821	15.528	2990	1.324	0.755	0.892	0.123374
451	SCLT1_KAN621-3_2.tif:0002-0237	0.898	7.595	0	39	67.169	17.08	0.803	6.824	1314	1.407	0.711	0.883	0.0542186
452	SCLT1_KAN621-3_2.tif:0003-0309	0.566	8.294	0	32	25.893	22.294	0.942	4.695	904	1.112	0.899	0.96	0.0373011
453	SCLT1_KAN621-3_2.tif:0004-0575	0.852	8.726	0	33	26.175	41.464	0.948	7.431	1431	1.115	0.897	0.945	0.0590463
454	SCLT1_KAN621-3_2.tif:0005-0766	0.763	9.83	0	42	6.634	55.241	0.913	7.504	1445	1.191	0.839	0.955	0.059624
455	SCLT1_KAN621-3_2.tif:0006-0787	1.039	9.47	0	68	59.865	56.719	0.784	9.836	1894	1.623	0.616	0.903	0.0781508
456	SCLT1_KAN621-3_2.tif:0007-0901	0.904	13.402	0	64	70.908	64.945	0.894	12.11	2332	1.245	0.803	0.921	0.0962236
457	SCLT1_KAN621-3_2.tif:0008-0922	0.841	9.037	0	36	44.898	66.423	0.861	7.603	1464	1.272	0.786	0.926	0.060408
458	SCLT1_KAN621-3_2.tif:0009-0944	0.67	9.496	0	59	34.113	68.07	0.878	6.362	1225	1.292	0.774	0.918	0.0505463
459	SCLT1_KAN621-3_3.tif:0001-0028	1.018	11.061	0	78	78.416	2.042	0.881	11.259	2168	1.33	0.752	0.922	0.0894566
460	SCLT1_KAN621-3_3.tif:0002-0217	0.597	10.504	0	50	20.275	15.681	0.952	6.273	1208	1.143	0.875	0.947	0.0498448
461	SCLT1_KAN621-3_3.tif:0003-0356	0.872	5.792	0	29	9.313	25.652	0.915	5.053	973	1.093	0.915	0.936	0.0401482
462	SCLT1_KAN621-3_3.tif:0004-0374	0.634	6.057	0	28	58.497	26.984	0.888	3.838	739	1.252	0.799	0.931	0.0304928
463	SCLT1_KAN621-3_3.tif:0005-0512	0.743	8.706	0	44	90.249	36.871	0.742	6.465	1245	1.794	0.557	0.854	0.0513715
464	SCLT1_KAN621-3_3.tif:0006-0801	0.961	11.854	0	111	74.288	57.67	0.803	11.389	2193	1.111	0.9	0.909	0.0904882
465	SCLT1_KAN621-3_3.tif:0007-0962	0.737	5.599	0	37	37.588	69.341	0.851	4.129	795	1.551	0.645	0.91	0.0328035
466	SCLT1_KAN621-3_4.tif:0001-0107	0.961	16.319	0	97	33.901	7.734	0.821	15.678	3019	1.367	0.732	0.918	0.124571
467	SCLT1_KAN621-3_4.tif:0002-0322	0.743	5.357	0	27	13.987	23.246	0.889	3.978	766	1.267	0.789	0.953	0.0316069
468	SCLT1_KAN621-3_4.tif:0003-0343	0.919	12.537	0	53	55.86	24.748	0.856	11.524	2219	1.536	0.651	0.965	0.091561
469	SCLT1_KAN621-3_4.tif:0004-0555	0.717	8.442	0	44	45.991	40.056	0.918	6.05	1165	1.272	0.786	0.911	0.0480706
470	SCLT1_KAN621-3_4.tif:0005-0583	0.846	7.123	0	24	6.939	41.976	0.846	6.029	1161	1.44	0.695	0.916	0.0479055
471	SCLT1_KAN621-3_4.tif:0006-0749	0.691	6.218	0	33	41.509	53.966	0.848	4.295	827	1.345	0.744	0.908	0.0341239
472	SCLT1_KAN621-3_4.tif:0007-0909	0.852	9.921	0	47	69.558	65.534	0.948	8.449	1627	1.167	0.857	0.94	0.0671337
473	SCLT1_KAN621-3_5.tif:0001-0138	0.753	14.028	0	65	44.069	10.006	0.838	10.563	2034	1.324	0.755	0.901	0.0839275
474	SCLT1_KAN621-3_5.tif:0002-0215	0.987	11.663	0	53	82.914	15.538	0.932	11.508	2216	1.213	0.825	0.952	0.0914372
475	SCLT1_KAN621-3_5.tif:0003-0465	0.8	21.422	0	111	64	33.47	0.89	17.132	3299	1.063	0.94	0.914	0.136124
476	SCLT1_KAN621-3_5.tif:0004-0612	0.711	14.818	0	81	16.85	44.078	0.817	10.542	2030	1.613	0.62	0.961	0.0837624
477	SCLT1_KAN621-3_5.tif:0005-0827	0.924	8.354	0	40	71.562	59.601	0.834	7.722	1487	1.727	0.579	0.939	0.061357
478	SCLT1_KAN621-3_5.tif:0006-0905	0.857	5.255	0	30	19.763	65.224	0.898	4.502	867	1.249	0.801	0.919	0.0357744
479	SCLT1_KAN621-3_5.tif:0007-0957	0.81	7.449	0	43	16.432	69.007	0.747	6.034	1162	1.825	0.548	0.869	0.0479468
480	SCLT1_KAN621-3_6.tif:0001-0059	1.127	8.194	0	40	24.713	4.23	0.917	9.233	1778	1.241	0.806	0.925	0.0733643
481	SCLT1_KAN621-3_6.tif:0002-0072	1.049	11.252	0	58	59.124	5.221	0.808	11.804	2273	1.123	0.891	0.884	0.0937892
482	SCLT1_KAN621-3_6.tif:0003-0145	0.795	7.68	0	32	48.349	10.48	0.775	6.102	1175	1.559	0.642	0.882	0.0484832
483	SCLT1_KAN621-3_6.tif:0004-0658	0.711	16.46	0	55	50.56	47.462	0.842	11.711	2255	1.285	0.778	0.901	0.0930464
484	SCLT1_KAN621-3_6.tif:0005-0781	0.997	11.604	0	85	26.836	56.273	0.844	11.57	2228	1.532	0.653	0.921	0.0919324
485	SCLT1_KAN621-3_6.tif:0006-0842	0.94	15.558	0	89	74.927	60.655	0.84	14.624	2816	1.1	0.909	0.885	0.116195
486	SCLT1_KAN621-3_6.tif:0007-0930	1.355	11.989	0	83	88.999	67.119	0.721	16.249	3129	1.082	0.925	0.845	0.12911
									AVERAGE	1766.34				0.0728832
									SEM	113.25
487	SCLT1_KAN621-4_1.tif:0001-0096	1.205	29.414	0	333	30.284	6.894	0.793	35.438	6824	1.404	0.712	0.912	0.281574
488	SCLT1_KAN621-4_1.tif:0002-0122	0.945	18.951	0	115	45.166	8.838	0.844	17.911	3449	1.366	0.732	0.912	0.142314
489	SCLT1_KAN621-4_1.tif:0003-0190	1.288	9.27	0	64	69.294	13.71	0.867	11.939	2299	1.407	0.711	0.907	0.094862
490	SCLT1_KAN621-4_1.tif:0004-0319	0.644	10.258	0	42	52.871	23.036	0.902	6.606	1272	1.325	0.755	0.954	0.0524856
491	SCLT1_KAN621-4_1.tif:0005-0441	0.784	18.311	0	104	17.033	31.838	0.928	14.359	2765	1.058	0.945	0.944	0.11409
492	SCLT1_KAN621-4_1.tif:0006-0521	0.732	11.844	0	78	75.555	37.57	0.975	8.673	1670	1.07	0.935	0.94	0.068908
493	SCLT1_KAN621-4_1.tif:0007-0607	1.376	58.355	0	589	70.194	43.746	0.83	80.307	15464	1.544	0.647	0.903	0.63808
494	SCLT1_KAN621-4_1.tif:0008-0749	0.966	18.022	0	86	51.791	53.932	0.891	17.407	3352	1.227	0.815	0.947	0.138311
495	SCLT1_KAN621-4_1.tif:0009-0828	0.914	6.761	0	31	39.206	59.716	0.926	6.18	1190	1.291	0.775	0.934	0.0491021
496	SCLT1_KAN621-4_1.tif:0010-0888	0.961	10.546	0	73	77.526	64.024	0.779	10.132	1951	1.601	0.624	0.885	0.0805027
497	SCLT1_KAN621-4_1.tif:0011-0983	0.691	7.977	0	31	20.435	70.835	0.905	5.51	1061	1.265	0.79	0.947	0.0437793
498	SCLT1_KAN621-4_2.tif:0001-0063	0.914	7.778	0	38	21.112	4.493	0.799	7.109	1369	1.218	0.821	0.88	0.0564881
499	SCLT1_KAN621-4_2.tif:0002-0135	0.857	17.133	0	94	89.115	9.772	0.93	14.681	2827	1.174	0.852	0.938	0.116648
500	SCLT1_KAN621-4_2.tif:0003-0326	0.805	20.09	0	86	50.146	23.553	0.905	16.171	3114	1.3	0.769	0.954	0.128491
501	SCLT1_KAN621-4_2.tif:0004-0580	1.101	16.882	0	158	83.82	41.85	0.924	18.586	3579	1.26	0.793	0.932	0.147678
502	SCLT1_KAN621-4_2.tif:0005-0601	1.007	12.557	0	56	41.425	43.275	0.853	12.651	2436	1.045	0.957	0.898	0.100515
503	SCLT1_KAN621-4_2.tif:0006-0621	0.987	14.184	0	105	12.229	44.691	0.882	13.996	2695	1.115	0.897	0.925	0.111202
504	SCLT1_KAN621-4_2.tif:0007-0977	0.821	14.329	0	70	82.473	70.424	0.9	11.757	2264	1.188	0.842	0.94	0.0934178
505	SCLT1_KAN621-4_3.tif:0001-0054	1.049	12.158	0	55	31.123	3.89	0.959	12.754	2456	1.196	0.836	0.955	0.10134
506	SCLT1_KAN621-4_3.tif:0002-0141	0.846	12.227	0	83	47.127	10.173	0.942	10.35	1993	1.273	0.786	0.945	0.0822357
507	SCLT1_KAN621-4_3.tif:0003-0336	0.644	5.694	0	35	35.451	24.23	0.955	3.666	706	1.267	0.789	0.958	0.0291312
508	SCLT1_KAN621-4_3.tif:0004-0339	1.002	15.933	0	87	69.941	24.476	0.916	15.969	3075	1.085	0.922	0.923	0.126882
509	SCLT1_KAN621-4_3.tif:0005-0430	0.55	9.557	0	59	44.459	30.975	0.916	5.261	1013	1.282	0.78	0.955	0.0417987
510	SCLT1_KAN621-4_3.tif:0006-0430	0.753	23.434	0	88	52.684	31.012	0.878	17.646	3398	1.43	0.699	0.945	0.140209
511	SCLT1_KAN621-4_3.tif:0007-0529	0.976	69.176	0	555	17.33	38.139	0.792	67.537	13005	1.469	0.681	0.879	0.536616
512	SCLT1_KAN621-4_3.tif:0008-0752	0.94	50.685	0	208	53.256	54.24	0.908	47.642	9174	1.188	0.842	0.935	0.37854
513	SCLT1_KAN621-4_3.tif:0009-0835	1.007	13.727	0	57	1.277	60.166	0.776	13.829	2663	1.292	0.774	0.87	0.109881
514	SCLT1_KAN621-4_3.tif:0010-0846	0.701	104.556	0	483	10.971	60.949	0.919	73.301	14115	1.193	0.838	0.944	0.582417
515	SCLT1_KAN621-4_3.tif:0011-0857	0.841	12.117	0	70	77.841	61.837	0.87	10.194	1963	1.215	0.823	0.928	0.0809979
516	SCLT1_KAN621-4_3.tif:0012-0963	0.701	16.319	0	125	58.415	69.4	0.919	11.441	2203	1.129	0.886	0.941	0.0909008
517	SCLT1_KAN621-4_4.tif:0001-0096	0.639	11.276	0	50	14.223	6.881	0.895	7.203	1387	1.212	0.825	0.943	0.0572308
518	SCLT1_KAN621-4_4.tif:0002-0313	0.872	71.774	0	497	44.245	22.57	0.88	62.619	12058	1.237	0.808	0.944	0.497541
519	SCLT1_KAN621-4_4.tif:0003-0601	1.142	58.082	0	678	12.487	43.349	0.891	66.358	12778	1.268	0.789	0.919	0.527249
520	SCLT1_KAN621-4_4.tif:0004-0620	1.127	12.419	0	99	80.161	44.648	0.843	13.996	2695	1.492	0.67	0.908	0.111202
521	SCLT1_KAN621-4_4.tif:0005-0759	0.914	8.943	0	35	46.052	54.7	0.832	8.174	1574	1.176	0.85	0.929	0.0649468
522	SCLT1_KAN621-4_4.tif:0006-0810	0.956	5.141	0	58	16.945	58.381	0.945	4.913	946	1.141	0.877	0.941	0.0390341
523	SCLT1_KAN621-4_4.tif:0007-0910	0.821	12.006	0	48	24.794	65.566	0.848	9.851	1897	1.237	0.809	0.929	0.0782746
524	SCLT1_KAN621-4_4.tif:0008-0934	1.023	9.614	0	55	79.295	67.382	0.855	9.836	1894	1.258	0.795	0.925	0.0781508
525	SCLT1_KAN621-4_5.tif:0001-0097	1.018	15.153	0	71	84.219	7.003	0.87	15.424	2970	1.27	0.787	0.938	0.122549
526	SCLT1_KAN621-4_5.tif:0002-0215	0.982	24.439	0	133	36.44	15.497	0.927	23.987	4619	1.192	0.839	0.936	0.19059
527	SCLT1_KAN621-4_5.tif:0003-0303	0.836	28.882	0	284	12.193	21.857	0.898	24.148	4650	1.384	0.722	0.92	0.19187
528	SCLT1_KAN621-4_5.tif:0004-0462	1.127	28.124	0	226	46.127	33.267	0.917	31.694	6103	1.233	0.811	0.935	0.251824
529	SCLT1_KAN621-4_5.tif:0005-0484	0.592	11.886	0	55	21.125	34.893	0.916	7.037	1355	1.326	0.754	0.95	0.0559104
530	SCLT1_KAN621-4_5.tif:0006-0706	1.08	14.851	0	88	73.937	50.894	0.887	16.042	3089	1.11	0.901	0.916	0.127459
531	SCLT1_KAN621-4_5.tif:0007-0952	0.95	11.415	0	79	18.287	68.585	0.869	10.848	2089	1.298	0.771	0.924	0.0861969
532	SCLT1_KAN621-4_5.tif:0008-1015	0.649	12.936	0	64	86.641	73.189	0.874	8.397	1617	1.56	0.641	0.947	0.0667211
533	SCLT1_KAN621-4_6.tif:0001-0065	0.628	6.612	0	37	69.266	4.706	0.932	4.155	800	1.194	0.838	0.938	0.0330098
534	SCLT1_KAN621-4_6.tif:0002-0164	0.779	16.4	0	66	86.273	11.84	0.833	12.775	2460	1.769	0.565	0.952	0.101505
535	SCLT1_KAN621-4_6.tif:0003-0198	0.976	7.287	0	41	53.652	14.244	0.853	7.115	1370	1.329	0.753	0.904	0.0565293
536	SCLT1_KAN621-4_6.tif:0004-0330	0.732	9.213	0	35	74.656	23.775	0.836	6.746	1299	1.408	0.71	0.879	0.0535997
537	SCLT1_KAN621-4_6.tif:0005-0388	0.909	12.549	0	75	28.446	27.954	0.846	11.404	2196	1.332	0.751	0.936	0.090612
538	SCLT1_KAN621-4_6.tif:0006-0518	1.184	13.145	0	95	57.648	37.302	0.85	15.564	2997	1.358	0.736	0.925	0.123663
539	SCLT1_KAN621-4_6.tif:0007-0667	0.878	21.189	0	130	58.4	48.025	0.898	18.597	3581	1.14	0.877	0.926	0.14776
540	SCLT1_KAN621-4_6.tif:0008-0752	1.106	11.254	0	60	13.696	54.127	0.731	12.448	2397	1.206	0.829	0.819	0.0989057
541	SCLT1_KAN621-4_6.tif:0009-0980	0.795	9.026	0	58	17.419	70.653	0.842	7.172	1381	1.04	0.962	0.897	0.0569832
									AVERAGE	3555.4				0.146704
									SEM	531.209
542	SCLT1_KAN621-5_1.tif:0001-0029	1.122	107.611	0	616	52.511	2.034	0.857	120.71	23244	1.283	0.779	0.921	0.959101
543	SCLT1_KAN621-5_1.tif:0002-0235	0.945	18.203	0	142	35.109	16.942	0.913	17.205	3313	1.061	0.943	0.931	0.136702
544	SCLT1_KAN621-5_1.tif:0003-0419	0.722	13.101	0	230	8.789	30.189	0.911	9.457	1821	1.403	0.713	0.942	0.0751386
545	SCLT1_KAN621-5_1.tif:0004-0423	1.028	85.258	0	738	39.283	30.45	0.715	87.666	16881	1.855	0.539	0.865	0.696549
546	SCLT1_KAN621-5_1.tif:0005-0527	0.722	7.216	0	40	83.845	37.969	0.911	5.209	1003	1.213	0.824	0.936	0.0413861
547	SCLT1_KAN621-5_1.tif:0006-0869	1.044	84.94	0	615	48.905	62.61	0.829	88.663	17073	1.7	0.588	0.926	0.704471
548	SCLT1_KAN621-5_1.tif:0007-0918	0.919	9.582	0	47	19.459	66.198	0.803	8.808	1696	1.687	0.593	0.91	0.0699808
549	SCLT1_KAN621-5_1.tif:0008-0986	1.267	119.045	0	886	69.808	71.098	0.828	150.845	29047	1.642	0.609	0.935	1.19855
550	SCLT1_KAN621-5_2.tif:0001-0184	0.805	36.542	0	318	2.275	13.261	0.865	29.414	5664	1.113	0.899	0.893	0.23371
551	SCLT1_KAN621-5_2.tif:0002-0268	0.893	84.494	0	437	51.37	19.375	0.843	75.472	14533	1.338	0.747	0.905	0.599665
552	SCLT1_KAN621-5_2.tif:0003-0732	1.059	71.289	0	497	89.621	52.762	0.841	75.524	14543	1.332	0.75	0.919	0.600077
553	SCLT1_KAN621-5_2.tif:0004-0755	0.893	59.465	0	378	34.147	54.425	0.731	53.116	10228	1.927	0.519	0.901	0.422031
554	SCLT1_KAN621-5_2.tif:0005-0984	0.966	93.833	0	767	58.033	70.92	0.852	90.636	17453	1.273	0.786	0.93	0.720151
555	SCLT1_KAN621-5_3.tif:0001-0121	0.732	5.766	0	34	51.353	8.753	0.949	4.222	813	1.189	0.841	0.937	0.0335462
556	SCLT1_KAN621-5_3.tif:0002-0127	0.878	54.923	0	302	9.255	9.188	0.907	48.203	9282	1.18	0.847	0.942	0.382997
557	SCLT1_KAN621-5_3.tif:0003-0387	0.872	11.81	0	88	73.659	27.902	0.915	10.303	1984	1.064	0.94	0.926	0.0818644
558	SCLT1_KAN621-5_3.tif:0004-0493	1.049	125.624	0	881	72.149	35.538	0.869	131.781	25376	1.431	0.699	0.922	1.04707
559	SCLT1_KAN621-5_3.tif:0005-0524	1.215	9.184	0	65	89.481	37.78	0.92	11.16	2149	1.445	0.692	0.942	0.0886726
560	SCLT1_KAN621-5_3.tif:0006-0558	1.407	74.188	0	645	55.195	40.291	0.767	104.408	20105	1.825	0.548	0.903	0.829578
561	SCLT1_KAN621-5_3.tif:0007-0621	0.971	54.588	0	383	37.803	44.729	0.771	53.012	10208	1.155	0.866	0.886	0.421205
562	SCLT1_KAN621-5_3.tif:0008-0813	0.717	49.493	0	261	49.072	58.576	0.929	35.469	6830	1.213	0.824	0.932	0.281821
563	SCLT1_KAN621-5_3.tif:0009-0836	0.919	17.322	0	104	63.176	60.25	0.909	15.922	3066	1.145	0.873	0.929	0.12651
564	SCLT1_KAN621-5_3.tif:0010-0846	0.592	8.763	0	47	33.336	61.037	0.68	5.188	999	2.444	0.409	0.912	0.041221
565	SCLT1_KAN621-5_3.tif:0011-0858	0.966	10.914	0	56	41.909	61.831	0.883	10.542	2030	1.356	0.737	0.914	0.0837624
566	SCLT1_KAN621-5_3.tif:0012-0862	1.127	80.774	0	699	34.329	62.158	0.809	91.025	17528	1.023	0.977	0.897	0.723245
567	SCLT1_KAN621-5_4.tif:0001-0024	0.93	61.436	0	432	40.454	1.789	0.92	57.109	10997	1.195	0.837	0.925	0.453761
568	SCLT1_KAN621-5_4.tif:0002-0160	0.644	35.202	0	256	13.149	11.578	0.877	22.668	4365	1.284	0.779	0.939	0.18011
569	SCLT1_KAN621-5_4.tif:0003-0299	0.898	62.081	0	377	74.663	21.536	0.885	55.774	10740	1.207	0.829	0.966	0.443157
570	SCLT1_KAN621-5_4.tif:0004-0500	1.044	6.448	0	36	89.873	36.037	0.857	6.73	1296	1.419	0.705	0.91	0.0534759
571	SCLT1_KAN621-5_4.tif:0005-0537	0.893	9.698	0	59	67.964	38.704	0.872	8.662	1668	1.248	0.801	0.92	0.0688255
572	SCLT1_KAN621-5_4.tif:0006-0772	0.846	28.479	0	179	7.957	55.684	0.799	24.107	4642	1.241	0.806	0.888	0.19154
573	SCLT1_KAN621-5_4.tif:0007-0778	0.878	14.893	0	75	68.119	56.13	0.856	13.071	2517	1.077	0.929	0.911	0.103857
574	SCLT1_KAN621-5_4.tif:0008-0801	0.867	25.048	0	110	63.089	57.701	0.909	21.723	4183	1.483	0.675	0.938	0.1726
575	SCLT1_KAN621-5_4.tif:0009-0887	0.597	21.443	0	203	18.785	63.942	0.924	12.806	2466	1.303	0.767	0.954	0.101753
576	SCLT1_KAN621-5_4.tif:0010-0924	0.748	9.417	0	47	60.785	66.622	0.943	7.042	1356	1.091	0.916	0.941	0.0559517
577	SCLT1_KAN621-5_5.tif:0001-0063	0.914	10.386	0	50	60.421	4.564	0.843	9.493	1828	1.536	0.651	0.921	0.0754275
578	SCLT1_KAN621-5_5.tif:0002-0273	1.309	58.302	0	542	90.554	19.657	0.801	76.298	14692	1.284	0.779	0.884	0.606225
579	SCLT1_KAN621-5_5.tif:0003-0306	0.685	40.258	0	234	59.147	22.073	0.842	27.596	5314	1.42	0.704	0.904	0.219268
580	SCLT1_KAN621-5_5.tif:0004-0325	0.618	57.782	0	331	18.033	23.414	0.776	35.708	6876	1.991	0.502	0.967	0.283719
581	SCLT1_KAN621-5_5.tif:0005-0465	0.644	94.96	0	335	54.652	33.519	0.877	61.149	11775	1.462	0.684	0.954	0.485863
582	SCLT1_KAN621-5_5.tif:0006-0714	0.883	15.206	0	59	4.402	51.481	0.731	13.424	2585	1.828	0.547	0.854	0.106663
583	SCLT1_KAN621-5_5.tif:0007-0847	1.231	60.945	0	515	72.559	61.044	0.748	75.01	14444	1.705	0.587	0.878	0.595992
584	SCLT1_KAN621-5_5.tif:0008-0846	0.924	77.539	0	347	17.067	61.022	0.815	71.676	13802	1.387	0.721	0.899	0.569502
585	SCLT1_KAN621-5_5.tif:0009-0934	1.132	5.381	0	40	81.781	67.33	0.84	6.092	1173	1.765	0.567	0.928	0.0484007
586	SCLT1_KAN621-5_6.tif:0001-0074	0.883	155.7	0	846	24.345	5.381	0.913	137.457	26469	1.274	0.785	0.944	1.09217
587	SCLT1_KAN621-5_6.tif:0002-0324	1.065	27.868	0	215	60.257	23.362	0.856	29.668	5713	1.172	0.853	0.899	0.235731
588	SCLT1_KAN621-5_6.tif:0003-0381	0.758	7.726	0	57	84.861	27.482	0.956	5.858	1128	1.014	0.986	0.948	0.0465439
589	SCLT1_KAN621-5_6.tif:0004-0536	0.857	13.455	0	64	72.395	38.666	0.93	11.529	2220	1.237	0.808	0.943	0.0916023
590	SCLT1_KAN621-5_6.tif:0005-0788	1.007	100.026	0	656	33.263	56.835	0.892	100.773	19405	1.162	0.861	0.902	0.800695
591	SCLT1_KAN621-5_6.tif:0006-0789	0.753	23.269	0	141	90.205	56.862	0.817	17.522	3374	1.393	0.718	0.898	0.139219
592	SCLT1_KAN621-5_6.tif:0007-0898	0.945	20.165	0	163	64.715	64.674	0.872	19.059	3670	1.199	0.834	0.922	0.151433
593	SCLT1_KAN621-5_6.tif:0008-0956	1.065	81.39	0	710	30.152	68.87	0.838	86.648	16685	1.222	0.819	0.893	0.688461
									AVERAGE	8697.15				0.358864
									SEM	1080.88
594	SCLT1_KAN621-6_1.tif:0001-0100	1.059	80.083	0	562	10.307	7.189	0.774	84.84	16337	1.899	0.527	0.929	0.674102
595	SCLT1_KAN621-6_1.tif:0002-0147	1.189	115.895	0	868	44.987	10.578	0.742	137.826	26540	1.845	0.542	0.874	1.0951
596	SCLT1_KAN621-6_1.tif:0003-0337	0.587	10.708	0	95	61.01	24.304	0.923	6.284	1210	1.467	0.682	0.919	0.0499274
597	SCLT1_KAN621-6_1.tif:0004-0385	1.226	125.801	0	1327	81.433	27.747	0.71	154.179	29689	1.571	0.637	0.847	1.22504
598	SCLT1_KAN621-6_1.tif:0005-0447	1.039	159.415	0	834	19.803	32.261	0.861	165.573	31883	1.147	0.872	0.913	1.31557
599	SCLT1_KAN621-6_1.tif:0006-0587	1.584	51.705	0	578	76.872	42.243	0.679	81.896	15770	2.095	0.477	0.879	0.650706
600	SCLT1_KAN621-6_1.tif:0007-0617	1.142	120.264	0	913	6.243	44.476	0.845	137.4	26458	1.124	0.89	0.946	1.09172
601	SCLT1_KAN621-6_1.tif:0008-0637	1.236	102.336	0	625	62.447	45.886	0.846	126.484	24356	1.199	0.834	0.905	1.00498
602	SCLT1_KAN621-6_1.tif:0009-0661	1.111	118.752	0	792	44.713	47.618	0.831	131.973	25413	1.403	0.713	0.905	1.0486
603	SCLT1_KAN621-6_1.tif:0010-0816	0.898	122.22	0	633	55.537	58.818	0.698	109.804	21144	1.808	0.553	0.852	0.87245
604	SCLT1_KAN621-6_1.tif:0011-0938	1.329	121.309	0	1058	51.328	67.652	0.77	161.273	31055	1.306	0.766	0.898	1.2814
605	SCLT1_KAN621-6_2.tif:0001-0103	1.719	131.731	0	1172	32.949	7.43	0.749	226.437	43603	1.918	0.521	0.879	1.79916
606	SCLT1_KAN621-6_2.tif:0002-0111	1.454	114.364	0	970	39.858	8.112	0.76	166.295	32022	1.633	0.612	0.905	1.3213
607	SCLT1_KAN621-6_2.tif:0003-0324	1.142	124.145	0	901	43.646	23.375	0.798	141.835	27312	1.699	0.589	0.896	1.12696
608	SCLT1_KAN621-6_2.tif:0004-0492	1.101	130.934	0	982	23.569	35.525	0.739	144.151	27758	1.855	0.539	0.867	1.14536
609	SCLT1_KAN621-6_2.tif:0005-0572	1.636	139.403	0	1459	64.954	41.166	0.666	228.041	43912	1.792	0.558	0.824	1.81191
610	SCLT1_KAN621-6_2.tif:0006-0696	1.413	106.279	0	723	71.539	50.107	0.784	150.123	28908	1.535	0.651	0.904	1.19281
611	SCLT1_KAN621-6_2.tif:0007-0781	1.579	89.217	0	924	21.338	56.38	0.719	140.849	27122	1.706	0.586	0.855	1.11912
612	SCLT1_KAN621-6_2.tif:0008-0799	1.22	105.166	0	622	12.065	57.587	0.877	128.343	24714	1.37	0.73	0.927	1.01976
613	SCLT1_KAN621-6_2.tif:0009-0933	1.823	158.632	0	1497	87.039	67.223	0.731	289.154	55680	2.093	0.478	0.899	2.29748
614	SCLT1_KAN621-6_3.tif:0001-0119	0.956	149.478	0	924	36.29	8.574	0.955	142.832	27504	1.108	0.903	0.961	1.13488
615	SCLT1_KAN621-6_3.tif:0002-0182	0.93	122.285	0	560	61.745	13.183	0.89	113.673	21889	1.412	0.708	0.93	0.90319
616	SCLT1_KAN621-6_3.tif:0003-0198	1.096	97.863	0	724	24.32	14.25	0.716	107.233	20649	1.743	0.574	0.829	0.852025
617	SCLT1_KAN621-6_3.tif:0004-0401	1.174	148.606	0	976	6.674	28.893	0.752	174.412	33585	1.287	0.777	0.863	1.38579
618	SCLT1_KAN621-6_3.tif:0005-0594	0.857	220.164	0	1183	44.508	42.832	0.886	188.651	36327	1.183	0.845	0.932	1.49893
619	SCLT1_KAN621-6_3.tif:0006-0604	1.018	210.75	0	1379	86.978	43.551	0.93	214.513	41307	1.099	0.91	0.942	1.70442
620	SCLT1_KAN621-6_3.tif:0007-0681	0.717	91.413	0	408	14.771	49.053	0.823	65.512	12615	1.413	0.707	0.948	0.520524
621	SCLT1_KAN621-6_3.tif:0008-0775	1.319	191.854	0	1730	76.059	55.865	0.852	253.067	48731	1.37	0.73	0.939	2.01075
622	SCLT1_KAN621-6_3.tif:0009-0813	0.654	15.373	0	113	47.84	58.58	0.959	10.059	1937	1.109	0.901	0.923	0.079925
623	SCLT1_KAN621-6_3.tif:0010-0976	0.846	187.417	0	1052	6.749	70.333	0.919	158.645	30549	1.045	0.957	0.934	1.26052
624	SCLT1_KAN621-6_4.tif:0001-0162	1.288	147.653	0	1301	41.457	11.767	0.774	190.163	36618	1.534	0.652	0.873	1.51094
625	SCLT1_KAN621-6_4.tif:0002-0178	0.602	36.931	0	121	73.583	12.818	0.844	22.247	4284	1.475	0.678	0.917	0.176768
626	SCLT1_KAN621-6_4.tif:0003-0210	0.545	83.314	0	276	17.804	15.11	0.935	45.43	8748	1.288	0.776	0.95	0.360962
627	SCLT1_KAN621-6_4.tif:0004-0382	1.018	119.628	0	599	23.163	27.536	0.859	121.764	23447	1.163	0.86	0.938	0.967477
628	SCLT1_KAN621-6_4.tif:0005-0387	1.127	126.839	0	1026	53.204	27.877	0.868	142.936	27524	1.071	0.934	0.923	1.1357
629	SCLT1_KAN621-6_4.tif:0006-0394	0.68	44.015	0	137	76.043	28.375	0.868	29.944	5766	1.48	0.676	0.936	0.237918
630	SCLT1_KAN621-6_4.tif:0007-0626	1.106	140.371	0	900	60.915	45.186	0.818	155.27	29899	1.456	0.687	0.908	1.2337
631	SCLT1_KAN621-6_4.tif:0008-0649	1.283	125.595	0	1062	43.548	46.804	0.861	161.102	31022	1.435	0.697	0.945	1.28004
632	SCLT1_KAN621-6_4.tif:0009-0724	1.007	115.18	0	810	10.573	52.144	0.869	116.041	22345	1.333	0.75	0.951	0.922006
633	SCLT1_KAN621-6_4.tif:0010-0776	0.774	47.685	0	255	79.89	55.945	0.8	36.897	7105	1.092	0.916	0.9	0.293169
634	SCLT1_KAN621-6_4.tif:0011-0910	0.976	122.543	0	691	31.371	65.636	0.661	119.64	23038	1.852	0.54	0.826	0.9506
635	SCLT1_KAN621-6_5.tif:0001-0016	0.628	96.636	0	356	46.747	1.156	0.733	60.723	11693	1.793	0.558	0.858	0.48248
636	SCLT1_KAN621-6_5.tif:0002-0028	1.065	122.839	0	968	59.746	2.098	0.787	130.774	25182	1.445	0.692	0.903	1.03907
637	SCLT1_KAN621-6_5.tif:0003-0153	1.163	174.772	0	1155	27.617	11.132	0.819	203.307	39149	1.394	0.717	0.928	1.61538
638	SCLT1_KAN621-6_5.tif:0004-0169	1.127	194.235	0	1348	89.331	12.201	0.914	218.886	42149	1.196	0.836	0.948	1.73916
639	SCLT1_KAN621-6_5.tif:0005-0402	1.106	113.488	0	862	42.435	28.958	0.763	125.534	24173	1.699	0.589	0.878	0.997433
640	SCLT1_KAN621-6_5.tif:0006-0478	0.763	48.789	0	273	62.544	34.432	0.928	37.245	7172	1.257	0.796	0.948	0.295933
641	SCLT1_KAN621-6_5.tif:0007-0640	1.485	98.178	0	911	86.261	46.193	0.758	145.818	28079	1.673	0.598	0.908	1.1586
642	SCLT1_KAN621-6_5.tif:0008-0675	0.878	8.402	0	42	23.984	48.611	0.898	7.374	1420	1.316	0.76	0.931	0.0585924
643	SCLT1_KAN621-6_5.tif:0009-0988	1.168	150.316	0	939	67.787	71.185	0.721	175.637	33821	1.723	0.58	0.862	1.39553
644	SCLT1_KAN621-6_6.tif:0001-0040	0.556	178.383	0	577	36.308	2.88	0.87	99.122	19087	1.334	0.75	0.951	0.787573
645	SCLT1_KAN621-6_6.tif:0002-0093	1.226	80.059	0	633	13.986	6.723	0.839	98.119	18894	1.508	0.663	0.908	0.77961
646	SCLT1_KAN621-6_6.tif:0003-0148	1.319	66.287	0	430	66.255	10.73	0.778	87.437	16837	1.484	0.674	0.89	0.694733
647	SCLT1_KAN621-6_6.tif:0004-0491	1.298	125.496	0	1058	15.936	35.37	0.774	162.93	31374	1.748	0.572	0.896	1.29456
648	SCLT1_KAN621-6_6.tif:0005-0526	1.153	149.698	0	707	57.123	37.867	0.87	172.584	33233	1.431	0.699	0.939	1.37127
649	SCLT1_KAN621-6_6.tif:0006-0753	1.174	119.58	0	627	22.35	54.258	0.915	140.345	27025	1.252	0.799	0.932	1.11511
650	SCLT1_KAN621-6_6.tif:0007-0962	1.584	151.987	0	1562	76.736	69.273	0.738	240.734	46356	1.549	0.646	0.874	1.91275
651	SCLT1_KAN621-6_6.tif:0008-0979	1.392	163.679	0	1664	50.335	70.497	0.83	227.803	43866	1.48	0.676	0.913	1.81001
									AVERAGE	25953.2				1.07089
									SEM	1613.21
652	SCLT1_KAN621-7_1.tif:0001-0037	1.023	110.807	0	592	23.626	2.701	0.855	113.361	21829	1.409	0.71	0.927	0.900714
653	SCLT1_KAN621-7_1.tif:0002-0098	1.142	193.464	0	1342	42.124	7.083	0.804	221.031	42562	1.288	0.776	0.917	1.75621
654	SCLT1_KAN621-7_1.tif:0003-0382	0.872	28.893	0	268	66.12	27.579	0.915	25.208	4854	1.174	0.852	0.933	0.200287
655	SCLT1_KAN621-7_1.tif:0004-0490	0.81	10.128	0	46	15.709	35.323	0.902	8.205	1580	1.346	0.743	0.934	0.0651944
656	SCLT1_KAN621-7_1.tif:0005-0594	0.597	7.583	0	34	58.964	42.846	0.952	4.528	872	1.292	0.774	0.958	0.0359807
657	SCLT1_KAN621-7_1.tif:0006-0716	1.148	155.575	0	1217	31.738	51.611	0.859	178.551	34382	1.441	0.694	0.925	1.41868
658	SCLT1_KAN621-7_1.tif:0007-0755	1.148	293.538	0	2146	56.648	54.416	0.911	336.89	64872	1.161	0.861	0.953	2.67677
659	SCLT1_KAN621-7_1.tif:0008-0758	1.158	213.758	0	1581	44.235	54.582	0.874	247.547	47668	1.542	0.648	0.947	1.96689
660	SCLT1_KAN621-7_1.tif:0009-0929	0.904	177.092	0	898	18.162	66.989	0.903	160.022	30814	1.226	0.816	0.93	1.27146
661	SCLT1_KAN621-7_1.tif:0010-0982	0.556	179.009	0	638	70.509	70.792	0.924	99.47	19154	1.246	0.802	0.955	0.790338
662	SCLT1_KAN621-7_2.tif:0001-0167	0.55	15.142	0	80	31.104	12.058	0.944	8.335	1605	1.091	0.916	0.942	0.066226
663	SCLT1_KAN621-7_2.tif:0002-0187	1.194	191.287	0	1523	70.965	13.483	0.818	228.478	43996	1.508	0.663	0.898	1.81538
664	SCLT1_KAN621-7_2.tif:0003-0194	0.795	58.222	0	301	10.657	13.948	0.65	46.261	8908	1.92	0.521	0.807	0.367564
665	SCLT1_KAN621-7_2.tif:0004-0353	1.293	159.651	0	1491	69.1	25.488	0.763	206.443	39753	1.514	0.66	0.874	1.6403
666	SCLT1_KAN621-7_2.tif:0005-0509	0.961	176.595	0	956	39.708	36.691	0.821	169.66	32670	1.657	0.604	0.911	1.34804
667	SCLT1_KAN621-7_2.tif:0006-0651	0.831	20.2	0	125	82.433	46.937	0.871	16.784	3232	1.504	0.665	0.922	0.13336
668	SCLT1_KAN621-7_2.tif:0007-0937	0.898	198.503	0	798	38.373	67.532	0.907	178.338	34341	1.15	0.87	0.956	1.41699
669	SCLT1_KAN621-7_2.tif:0008-0985	1.355	137.433	0	1274	84.505	70.947	0.794	186.278	35870	1.56	0.641	0.883	1.48008
670	SCLT1_KAN621-7_3.tif:0001-0059	1.402	152.415	0	1015	55.733	4.258	0.753	213.708	41152	1.808	0.553	0.894	1.69803
671	SCLT1_KAN621-7_3.tif:0002-0302	0.846	148.994	0	838	24.258	21.846	0.846	126.121	24286	1.235	0.81	0.906	1.0021
672	SCLT1_KAN621-7_3.tif:0003-0519	0.649	20.92	0	91	74.163	37.397	0.936	13.58	2615	1.163	0.86	0.951	0.107901
673	SCLT1_KAN621-7_3.tif:0004-0545	0.836	131.702	0	395	81.309	39.288	0.965	110.115	21204	1.239	0.807	0.964	0.874925
674	SCLT1_KAN621-7_3.tif:0005-0624	1.439	155.134	0	1293	53.696	44.947	0.752	223.16	42972	1.353	0.739	0.884	1.77312
675	SCLT1_KAN621-7_3.tif:0006-0715	1.002	181.026	0	1089	13.582	51.569	0.884	181.438	34938	1.155	0.866	0.937	1.44162
676	SCLT1_KAN621-7_3.tif:0007-0962	1.101	127.58	0	642	12.711	69.33	0.866	140.459	27047	1.447	0.691	0.93	1.11602
677	SCLT1_KAN621-7_4.tif:0001-0135	0.898	106.861	0	464	36.181	9.724	0.919	96.006	18487	1.291	0.775	0.951	0.762816
678	SCLT1_KAN621-7_4.tif:0002-0387	0.893	108.297	0	681	50.806	27.913	0.872	96.733	18627	1.34	0.746	0.927	0.768593
679	SCLT1_KAN621-7_4.tif:0003-0424	1.402	182.156	0	1396	82.673	30.545	0.858	255.409	49182	1.216	0.822	0.923	2.02936
680	SCLT1_KAN621-7_4.tif:0004-0587	0.836	168.565	0	846	11.653	42.263	0.864	140.937	27139	1.328	0.753	0.939	1.11982
681	SCLT1_KAN621-7_4.tif:0005-0593	0.992	159.178	0	800	38.817	42.761	0.903	157.887	30403	1.259	0.794	0.967	1.2545
682	SCLT1_KAN621-7_4.tif:0006-0956	1.002	78.041	0	488	29.757	68.904	0.876	78.219	15062	1.397	0.716	0.928	0.621493
683	SCLT1_KAN621-7_5.tif:0001-0053	0.821	54.177	0	248	44.265	3.833	0.869	44.453	8560	1.251	0.8	0.921	0.353205
684	SCLT1_KAN621-7_5.tif:0002-0084	0.711	46.277	0	263	74.387	6.086	0.932	32.925	6340	1.223	0.818	0.951	0.261603
685	SCLT1_KAN621-7_5.tif:0003-0320	0.992	132.382	0	715	20.291	23.132	0.671	131.309	25285	1.981	0.505	0.834	1.04332
686	SCLT1_KAN621-7_5.tif:0004-0525	1.065	82.171	0	568	19.463	37.851	0.657	87.479	16845	2.338	0.428	0.842	0.695063
687	SCLT1_KAN621-7_5.tif:0005-0532	0.971	188.155	0	1136	47.458	38.383	0.868	182.721	35185	1.229	0.813	0.917	1.45181
688	SCLT1_KAN621-7_5.tif:0006-0532	0.576	13.189	0	123	56.329	38.396	0.947	7.603	1464	1.09	0.917	0.945	0.060408
689	SCLT1_KAN621-7_5.tif:0007-0712	0.566	5.33	0	33	75.289	51.31	0.93	3.017	581	1.298	0.771	0.936	0.0239734
690	SCLT1_KAN621-7_5.tif:0008-0748	1.418	58.524	0	500	40.008	53.852	0.754	82.971	15977	1.715	0.583	0.891	0.659248
691	SCLT1_KAN621-7_6.tif:0001-0116	1.22	146.783	0	1234	52.953	8.412	0.677	179.132	34494	1.915	0.522	0.851	1.4233
692	SCLT1_KAN621-7_6.tif:0002-0501	1.34	162.089	0	1306	63.549	36.101	0.82	217.172	41819	1.588	0.63	0.912	1.72555
693	SCLT1_KAN621-7_6.tif:0003-0867	0.898	119.607	0	720	60.693	62.47	0.868	107.457	20692	1.532	0.653	0.92	0.853799
694	SCLT1_KAN621-7_7.tif:0001-0162	1.729	122.255	0	1330	38.197	11.652	0.783	211.418	40711	1.778	0.563	0.894	1.67983
695	SCLT1_KAN621-7_7.tif:0002-0286	1.054	219.246	0	1381	83.561	20.612	0.893	231.131	44507	1.362	0.734	0.938	1.83646
696	SCLT1_KAN621-7_7.tif:0003-0298	1.309	154.044	0	1141	51.413	21.452	0.719	201.593	38819	1.87	0.535	0.892	1.60176
697	SCLT1_KAN621-7_7.tif:0004-0336	0.649	41.968	0	197	30.688	24.252	0.874	27.243	5246	1.481	0.675	0.926	0.216462
698	SCLT1_KAN621-7_7.tif:0005-0443	1.47	175.11	0	1545	67.344	31.933	0.732	257.352	49556	1.877	0.533	0.867	2.04479
699	SCLT1_KAN621-7_7.tif:0006-0461	1.459	103.907	0	980	48.285	33.281	0.75	151.63	29198	1.54	0.649	0.884	1.20478
700	SCLT1_KAN621-7_7.tif:0007-0524	0.53	88.784	0	288	27.673	37.772	0.938	47.029	9056	1.36	0.735	0.94	0.373671
701	SCLT1_KAN621-7_7.tif:0008-0571	1.345	153.757	0	1369	68.854	41.131	0.862	206.807	39823	1.053	0.95	0.93	1.64319
702	SCLT1_KAN621-7_7.tif:0009-0685	0.976	228.968	0	1232	23.622	49.361	0.931	223.544	43046	1.112	0.899	0.957	1.77618
703	SCLT1_KAN621-7_7.tif:0010-0818	1.21	199.798	0	1809	87.998	58.909	0.812	241.757	46553	1.168	0.856	0.903	1.92088
704	SCLT1_KAN621-7_7.tif:0011-0875	1.298	111.58	0	919	22.716	63.076	0.706	144.863	27895	2.05	0.488	0.912	1.15101
									AVERAGE	26485.4				1.09285
									SEM	2224.47
705	SCLT1_KAN621-8_1.tif:0001-0142	0.556	45.262	0	143	58.947	10.268	0.941	25.15	4843	1.476	0.677	0.934	0.199833
706	SCLT1_KAN621-8_1.tif:0002-0167	0.878	108.728	0	505	81.102	12.116	0.877	95.424	18375	1.351	0.74	0.926	0.758194
707	SCLT1_KAN621-8_1.tif:0003-0209	1.454	106.043	0	922	34.712	15.115	0.712	154.195	29692	2.065	0.484	0.896	1.22516
708	SCLT1_KAN621-8_1.tif:0004-0401	0.841	177.821	0	1064	52.367	28.91	0.87	149.599	28807	1.142	0.876	0.931	1.18864
709	SCLT1_KAN621-8_1.tif:0005-0467	0.732	37.475	0	117	50.12	33.683	0.867	27.441	5284	1.518	0.659	0.922	0.21803
710	SCLT1_KAN621-8_1.tif:0006-0693	1.153	137.122	0	694	68.556	49.936	0.768	158.085	30441	1.805	0.554	0.886	1.25607
711	SCLT1_KAN621-8_1.tif:0007-0879	1.117	105.051	0	689	15.228	63.376	0.812	117.292	22586	1.603	0.624	0.892	0.93195
712	SCLT1_KAN621-8_1.tif:0008-0938	1.028	87.672	0	368	60.681	67.607	0.898	90.148	17359	1.218	0.821	0.941	0.716272
713	SCLT1_KAN621-8_1.tif:0009-0979	0.878	133.178	0	664	85.888	70.587	0.848	116.882	22507	1.198	0.835	0.909	0.92869
714	SCLT1_KAN621-8_2.tif:0001-0336	0.685	50.621	0	194	59.651	24.267	0.949	34.701	6682	1.257	0.796	0.943	0.275715
715	SCLT1_KAN621-8_2.tif:0002-0387	1.085	152.388	0	1012	13.506	27.917	0.919	165.397	31849	1.262	0.792	0.935	1.31416
716	SCLT1_KAN621-8_2.tif:0003-0433	1.122	201.801	0	1343	70.194	31.207	0.839	226.364	43589	1.463	0.683	0.902	1.79858
717	SCLT1_KAN621-8_2.tif:0004-0833	0.841	25.846	0	187	39.587	60.078	0.936	21.744	4187	1.16	0.862	0.939	0.172765
718	SCLT1_KAN621-8_2.tif:0005-0886	0.727	3.293	0	13	49.048	63.888	0.848	2.394	461	1.873	0.534	0.966	0.0190219
719	SCLT1_KAN621-8_3.tif:0001-0118	1.246	124.638	0	939	41.454	8.532	0.853	155.343	29913	1.325	0.755	0.934	1.23428
720	SCLT1_KAN621-8_3.tif:0002-0219	1.423	111.208	0	1010	20.279	15.787	0.812	158.24	30471	1.492	0.67	0.9	1.2573
721	SCLT1_KAN621-8_3.tif:0003-0269	1.044	101.925	0	907	78.794	19.411	0.829	106.392	20487	1.477	0.677	0.924	0.84534
722	SCLT1_KAN621-8_3.tif:0004-0393	1.293	113.88	0	1035	7.679	28.34	0.845	147.257	28356	1.457	0.687	0.921	1.17003
723	SCLT1_KAN621-8_3.tif:0005-0532	1.439	122.007	0	951	23.592	38.367	0.798	175.508	33796	1.608	0.622	0.92	1.3945
724	SCLT1_KAN621-8_3.tif:0006-0651	0.727	38.4	0	155	73.691	46.932	0.979	27.918	5376	1.089	0.918	0.969	0.221826
725	SCLT1_KAN621-8_3.tif:0007-0793	1.033	176.714	0	1326	78.314	57.123	0.845	182.622	35166	1.089	0.918	0.926	1.45103
726	SCLT1_KAN621-8_3.tif:0008-0940	1.142	129.459	0	1056	44.239	67.769	0.761	147.906	28481	1.626	0.615	0.863	1.17519
727	SCLT1_KAN621-8_4.tif:0001-0027	1.007	162.531	0	1074	22.962	1.989	0.9	163.745	31531	1.118	0.895	0.922	1.30104
728	SCLT1_KAN621-8_4.tif:0002-0053	0.945	175.209	0	1080	11.898	3.847	0.922	165.599	31888	1.189	0.841	0.95	1.31577
729	SCLT1_KAN621-8_4.tif:0003-0339	1.387	98.191	0	1011	65.632	24.45	0.769	136.149	26217	1.783	0.561	0.91	1.08177
730	SCLT1_KAN621-8_4.tif:0004-0451	0.982	107.878	0	798	39.003	32.554	0.885	105.883	20389	1.135	0.881	0.938	0.841297
731	SCLT1_KAN621-8_4.tif:0005-0651	1.47	123.922	0	1130	12.335	46.875	0.757	182.124	35070	1.499	0.667	0.858	1.44707
732	SCLT1_KAN621-8_4.tif:0006-0674	1.272	167.037	0	1287	78.576	48.671	0.831	212.524	40924	1.36	0.736	0.916	1.68862
733	SCLT1_KAN621-8_4.tif:0007-0871	1.117	133.949	0	1003	44.525	62.762	0.735	149.557	28799	1.566	0.639	0.862	1.18831
734	SCLT1_KAN621-8_4.tif:0008-0906	0.634	11.959	0	56	8.28	65.286	0.863	7.577	1459	1.302	0.768	0.935	0.0602017
735	SCLT1_KAN621-8_4.tif:0009-0999	1.428	186.909	0	1597	78.198	72.048	0.787	266.928	51400	1.498	0.668	0.887	2.12088
736	SCLT1_KAN621-8_5.tif:0001-0207	0.717	131.029	0	511	45.126	14.84	0.767	93.902	18082	1.689	0.592	0.893	0.746105
737	SCLT1_KAN621-8_5.tif:0002-0395	0.54	54.788	0	261	45.583	28.458	0.882	29.591	5698	1.176	0.851	0.972	0.235112
738	SCLT1_KAN621-8_5.tif:0003-0505	1.054	64.759	0	417	90.333	36.437	0.764	68.269	13146	1.506	0.664	0.885	0.542434
739	SCLT1_KAN621-8_5.tif:0004-0546	1.475	155.074	0	1541	78.025	39.389	0.903	228.711	44041	1.512	0.661	0.953	1.81723
740	SCLT1_KAN621-8_5.tif:0005-0705	0.66	27.488	0	99	14.254	50.827	0.913	18.129	3491	1.344	0.744	0.93	0.144047
741	SCLT1_KAN621-8_5.tif:0006-0826	0.919	121.718	0	649	36.057	59.55	0.837	111.881	21544	1.442	0.694	0.934	0.888955
742	SCLT1_KAN621-8_5.tif:0007-0840	0.805	125.684	0	458	45.802	60.561	0.883	101.168	19481	1.338	0.747	0.945	0.803831
743	SCLT1_KAN621-8_5.tif:0008-0974	1.111	178.322	0	1230	68.228	70.221	0.839	198.176	38161	1.115	0.897	0.911	1.57461
744	SCLT1_KAN621-8_6.tif:0001-0132	1.127	115.106	0	658	16.989	9.509	0.728	129.714	24978	2.005	0.499	0.889	1.03065
745	SCLT1_KAN621-8_6.tif:0002-0141	0.753	53.869	0	195	74.957	10.174	0.925	40.564	7811	1.311	0.763	0.951	0.3223
746	SCLT1_KAN621-8_6.tif:0003-0177	0.576	15.459	0	96	51.846	12.781	0.959	8.911	1716	1.001	0.999	0.961	0.0708061
747	SCLT1_KAN621-8_6.tif:0004-0200	1.153	96.977	0	649	86.077	14.443	0.845	111.803	21529	1.544	0.648	0.912	0.888336
748	SCLT1_KAN621-8_6.tif:0005-0213	1.283	192.291	0	1420	5.803	15.346	0.878	246.654	47496	1.252	0.799	0.929	1.95979
749	SCLT1_KAN621-8_6.tif:0006-0532	0.623	148.133	0	519	37.376	38.346	0.909	92.313	17776	1.25	0.8	0.968	0.733478
750	SCLT1_KAN621-8_6.tif:0007-0571	1.298	138.656	0	1059	58.648	41.129	0.858	180.015	34664	1.308	0.765	0.893	1.43032
751	SCLT1_KAN621-8_6.tif:0008-0679	1.044	85.597	0	676	27.143	48.996	0.804	89.348	17205	1.48	0.676	0.88	0.709918
752	SCLT1_KAN621-8_6.tif:0009-0950	1.127	131.341	0	1016	21.221	68.459	0.876	148.01	28501	1.254	0.797	0.939	1.17602
									AVERAGE	23160.5				0.955656
									SEM	1900.62
753	SCLT1_KAN621-9_1.tif:0001-0125	0.888	18.491	0	99	1.686	9.02	0.846	16.421	3162	1.165	0.858	0.917	0.130471
754	SCLT1_KAN621-9_1.tif:0002-0179	1.101	12.561	0	59	67.281	12.948	0.705	13.829	2663	1.681	0.595	0.86	0.109881
755	SCLT1_KAN621-9_1.tif:0003-0400	0.769	20.155	0	101	15.312	28.887	0.887	15.491	2983	1.136	0.88	0.919	0.123085
756	SCLT1_KAN621-9_1.tif:0004-0556	0.774	32.221	0	265	48.003	40.11	0.94	24.932	4801	1.141	0.877	0.94	0.1981
757	SCLT1_KAN621-9_1.tif:0005-0616	1.08	46.25	0	286	69.593	44.391	0.843	49.958	9620	1.27	0.787	0.891	0.396943
758	SCLT1_KAN621-9_1.tif:0006-0846	1.007	74.005	0	531	50.231	60.974	0.888	74.558	14357	1.264	0.791	0.944	0.592403
759	SCLT1_KAN621-9_1.tif:0007-0890	0.961	59.919	0	426	28.02	64.189	0.811	57.566	11085	1.431	0.699	0.944	0.457392
760	SCLT1_KAN621-9_1.tif:0008-0979	0.763	9.626	0	40	62.463	70.58	0.904	7.348	1415	1.475	0.678	0.942	0.0583861
761	SCLT1_KAN621-9_1.tif:0009-0985	1.018	14.735	0	68	74.75	70.972	0.909	14.998	2888	1.199	0.834	0.931	0.119165
762	SCLT1_KAN621-9_2.tif:0001-0054	0.795	8.928	0	49	72.688	3.913	0.768	7.094	1366	1.238	0.808	0.838	0.0563643
763	SCLT1_KAN621-9_2.tif:0002-0180	1.22	50.894	0	661	15.229	13.034	0.835	62.11	11960	1.167	0.857	0.911	0.493497
764	SCLT1_KAN621-9_2.tif:0003-0184	1.023	24.604	0	197	33.838	13.259	0.772	25.171	4847	1.186	0.843	0.874	0.199998
765	SCLT1_KAN621-9_2.tif:0004-0199	0.846	12.282	0	124	79.427	14.351	0.887	10.397	2002	1.087	0.92	0.903	0.0826071
766	SCLT1_KAN621-9_2.tif:0005-0568	1.08	57.288	0	509	8.267	40.929	0.717	61.882	11916	2.339	0.428	0.914	0.491681
767	SCLT1_KAN621-9_2.tif:0006-0678	1.329	74.914	0	748	56.856	48.842	0.799	99.594	19178	1.676	0.597	0.895	0.791328
768	SCLT1_KAN621-9_2.tif:0007-0748	0.841	29.037	0	125	24.571	53.882	0.913	24.429	4704	1.195	0.837	0.942	0.194098
769	SCLT1_KAN621-9_2.tif:0008-0844	0.909	33.686	0	240	8.349	60.819	0.838	30.614	5895	1.665	0.601	0.923	0.243241
770	SCLT1_KAN621-9_2.tif:0009-0900	1.329	54.191	0	512	61.813	64.884	0.73	72.045	13873	1.956	0.511	0.908	0.572432
771	SCLT1_KAN621-9_3.tif:0001-0028	0.904	88.856	0	579	20.008	2.058	0.861	80.291	15461	1.157	0.864	0.935	0.637956
772	SCLT1_KAN621-9_3.tif:0002-0205	1.267	82.939	0	694	84.297	14.799	0.895	105.094	20237	1.082	0.924	0.912	0.835025
773	SCLT1_KAN621-9_3.tif:0003-0294	0.722	9.36	0	55	49.46	21.202	0.901	6.756	1301	1.345	0.743	0.924	0.0536822
774	SCLT1_KAN621-9_3.tif:0004-0398	0.852	7.921	0	44	30.242	28.702	0.851	6.746	1299	1.449	0.69	0.911	0.0535997
775	SCLT1_KAN621-9_3.tif:0005-0459	1.423	66.015	0	588	75.131	33.2	0.789	93.934	18088	1.333	0.75	0.913	0.746352
776	SCLT1_KAN621-9_3.tif:0006-0646	1.075	45.411	0	380	63.766	46.626	0.727	48.816	9400	2.069	0.483	0.92	0.387865
777	SCLT1_KAN621-9_3.tif:0007-0896	0.961	26.119	0	105	79.481	64.583	0.858	25.093	4832	1.537	0.651	0.916	0.199379
778	SCLT1_KAN621-9_3.tif:0008-0985	0.602	22.56	0	167	29.444	70.979	0.905	13.59	2617	1.133	0.883	0.943	0.107983
779	SCLT1_KAN621-9_4.tif:0001-0140	0.654	63.54	0	383	52.491	10.112	0.892	41.576	8006	1.137	0.88	0.94	0.330346
780	SCLT1_KAN621-9_4.tif:0002-0250	0.846	78.429	0	451	6.154	18.013	0.834	66.389	12784	1.345	0.744	0.926	0.527497
781	SCLT1_KAN621-9_4.tif:0003-0263	0.997	26.536	0	158	41.053	18.935	0.722	26.459	5095	1.319	0.758	0.844	0.210231
782	SCLT1_KAN621-9_4.tif:0004-0289	0.711	67.139	0	305	67.271	20.826	0.754	47.767	9198	1.981	0.505	0.901	0.37953
783	SCLT1_KAN621-9_4.tif:0005-0463	0.826	34.157	0	155	63.068	33.376	0.896	28.204	5431	1.407	0.711	0.938	0.224095
784	SCLT1_KAN621-9_4.tif:0006-0470	0.592	5.684	0	46	89.56	33.857	0.807	3.365	648	2.065	0.484	0.946	0.026738
785	SCLT1_KAN621-9_4.tif:0007-0600	0.841	16.494	0	124	38.127	43.222	0.861	13.876	2672	1.102	0.908	0.898	0.110253
786	SCLT1_KAN621-9_4.tif:0008-0755	0.909	22.154	0	148	26.142	54.432	0.82	20.134	3877	1.321	0.757	0.907	0.159974
787	SCLT1_KAN621-9_4.tif:0009-0776	1.013	34.374	0	196	80.712	55.985	0.814	34.81	6703	1.23	0.813	0.878	0.276581
788	SCLT1_KAN621-9_4.tif:0010-0824	0.634	17.852	0	76	43.564	59.412	0.968	11.311	2178	1.176	0.85	0.938	0.0898693
789	SCLT1_KAN621-9_5.tif:0001-0106	1.101	118.335	0	601	4.84	7.659	0.745	130.28	25087	1.957	0.511	0.942	1.03515
790	SCLT1_KAN621-9_5.tif:0002-0115	1.142	30.482	0	155	78.421	8.279	0.873	34.825	6706	1.348	0.742	0.919	0.276705
791	SCLT1_KAN621-9_5.tif:0003-0276	0.582	58.268	0	266	52.781	19.918	0.899	33.89	6526	1.362	0.734	0.945	0.269278
792	SCLT1_KAN621-9_5.tif:0004-0435	0.982	46.466	0	317	36.105	31.36	0.897	45.606	8782	1.326	0.754	0.924	0.362365
793	SCLT1_KAN621-9_5.tif:0005-0494	1.205	87.03	0	570	79.584	35.628	0.883	104.855	20191	1.307	0.765	0.935	0.833127
794	SCLT1_KAN621-9_5.tif:0006-0712	0.93	67.453	0	356	67.669	51.309	0.869	62.702	12074	1.452	0.689	0.918	0.498201
795	SCLT1_KAN621-9_5.tif:0007-0772	0.789	63.224	0	387	19.067	55.648	0.879	49.906	9610	1.19	0.84	0.902	0.396531
796	SCLT1_KAN621-9_5.tif:0008-0816	1.272	108.298	0	1082	78.692	58.842	0.822	137.79	26533	1.433	0.698	0.918	1.09481
797	SCLT1_KAN621-9_6.tif:0001-0098	0.997	28.615	0	210	74.268	7.049	0.819	28.531	5494	1.292	0.774	0.891	0.226695
798	SCLT1_KAN621-9_6.tif:0002-0121	1.122	59.782	0	433	32.883	8.75	0.799	67.059	12913	1.44	0.694	0.885	0.53282
799	SCLT1_KAN621-9_6.tif:0003-0520	1.007	75.17	0	422	63.849	37.423	0.909	75.732	14583	1.142	0.876	0.949	0.601728
800	SCLT1_KAN621-9_6.tif:0004-0550	0.935	21.883	0	101	14.572	39.663	0.799	20.456	3939	1.365	0.733	0.889	0.162532
801	SCLT1_KAN621-9_6.tif:0005-0895	0.784	12.603	0	73	83.227	64.53	0.978	9.883	1903	1.134	0.882	0.944	0.0785221
802	SCLT1_KAN621-9_6.tif:0006-0907	1.013	42.354	0	292	20.318	65.408	0.804	42.89	8259	1.319	0.758	0.92	0.340785
									AVERAGE	8422.84				0.347546
									SEM	913.299
1	SCLT1_KAN621-10_1.tif:0001-0019	1.039	134.645	0	787	68.687	1.389	0.853	139.846	26929	1.213	0.824	0.893	1.11115
2	SCLT1_KAN621-10_1.tif:0002-0107	1.08	64.861	0	523	59.566	7.741	0.895	70.061	13491	1.421	0.704	0.939	0.556669
3	SCLT1_KAN621-10_1.tif:0003-0130	1.272	123.71	0	929	22.899	9.375	0.794	157.399	30309	1.689	0.592	0.902	1.25062
4	SCLT1_KAN621-10_1.tif:0004-0136	1.007	166.5	0	1217	4.265	9.821	0.861	167.744	32301	1.32	0.758	0.933	1.33281
5	SCLT1_KAN621-10_1.tif:0005-0478	1.163	150.009	0	1095	73.45	34.425	0.853	174.5	33602	1.546	0.647	0.926	1.3865
6	SCLT1_KAN621-10_1.tif:0006-0484	0.992	74.283	0	484	5.972	34.857	0.859	73.68	14188	1.393	0.718	0.903	0.585429
7	SCLT1_KAN621-10_1.tif:0007-0584	1.122	156.796	0	1081	52.821	42.163	0.806	175.881	33868	1.452	0.689	0.893	1.39747
8	SCLT1_KAN621-10_1.tif:0008-0676	0.763	74.333	0	326	47.074	48.763	0.859	56.746	10927	1.381	0.724	0.919	0.450873
9	SCLT1_KAN621-10_1.tif:0009-0898	1.293	98.679	0	865	61.549	64.693	0.807	127.601	24571	1.452	0.689	0.886	1.01386
10	SCLT1_KAN621-10_1.tif:0010-0920	1.07	120.806	0	787	6.73	66.372	0.798	129.237	24886	1.619	0.618	0.926	1.02685
11	SCLT1_KAN621-10_1.tif:0011-0925	1.236	106.366	0	847	23.766	66.669	0.768	131.465	25315	1.699	0.589	0.908	1.04455
12	SCLT1_KAN621-10_1.tif:0012-0976	1.163	154.451	0	1089	85.206	70.333	0.87	179.667	34597	1.593	0.628	0.931	1.42755
13	SCLT1_KAN621-10_2.tif:0001-0058	0.846	94.399	0	412	37.722	4.18	0.906	79.907	15387	1.325	0.755	0.959	0.634903
14	SCLT1_KAN621-10_2.tif:0002-0272	1.303	191.693	0	1556	77.406	19.614	0.892	249.868	48115	1.273	0.786	0.928	1.98533
15	SCLT1_KAN621-10_2.tif:0003-0285	0.93	166.911	0	1148	83.53	20.576	0.827	155.156	29877	1.381	0.724	0.94	1.23279
16	SCLT1_KAN621-10_2.tif:0004-0291	0.878	84.189	0	482	56.546	20.981	0.877	73.888	14228	1.176	0.851	0.916	0.58708
17	SCLT1_KAN621-10_2.tif:0005-0326	1.028	214.136	0	1425	30.952	23.545	0.907	220.184	42399	1.152	0.868	0.945	1.74948
18	SCLT1_KAN621-10_2.tif:0006-0368	0.815	53.427	0	340	39.161	26.473	0.843	43.56	8388	1.355	0.738	0.915	0.346108
19	SCLT1_KAN621-10_2.tif:0007-0428	0.95	142.115	0	916	17.307	30.791	0.838	135.058	26007	1.509	0.663	0.941	1.07311
20	SCLT1_KAN621-10_2.tif:0008-0429	0.971	222.647	0	952	71.989	30.922	0.938	216.217	41635	1.172	0.853	0.944	1.71796
21	SCLT1_KAN621-10_2.tif:0009-0510	1.065	195.58	0	1126	10.737	36.797	0.845	208.214	40094	1.442	0.693	0.943	1.65437
22	SCLT1_KAN621-10_2.tif:0010-0629	0.93	172.514	0	749	72.988	45.398	0.929	160.364	30880	1.275	0.784	0.955	1.27418
23	SCLT1_KAN621-10_2.tif:0011-0676	1.387	180.723	0	1565	90.362	48.689	0.898	250.585	48253	1.001	0.999	0.919	1.99103
24	SCLT1_KAN621-10_2.tif:0012-0767	0.711	88.679	0	375	39.803	55.319	0.78	63.092	12149	1.63	0.613	0.875	0.501295
25	SCLT1_KAN621-10_2.tif:0013-0893	1.08	157.274	0	945	52.947	64.374	0.857	169.883	32713	1.165	0.858	0.924	1.34981
26	SCLT1_KAN621-10_2.tif:0014-0918	0.966	187.07	0	1081	29.204	66.109	0.883	180.696	34795	1.145	0.874	0.923	1.43572
27	SCLT1_KAN621-10_2.tif:0015-0973	0.68	83.985	0	299	73.059	70.136	0.836	57.135	11002	1.607	0.622	0.913	0.453968
28	SCLT1_KAN621-10_3.tif:0001-0020	0.748	67.799	0	357	56.825	1.474	0.792	50.701	9763	1.439	0.695	0.878	0.402844
29	SCLT1_KAN621-10_3.tif:0002-0052	1.371	55.125	0	495	38.684	3.769	0.777	75.576	14553	1.505	0.664	0.86	0.60049
30	SCLT1_KAN621-10_3.tif:0003-0070	1.309	109.056	0	978	72.776	5.078	0.82	142.718	27482	1.373	0.728	0.946	1.13397
31	SCLT1_KAN621-10_3.tif:0004-0081	0.831	34.337	0	240	88.827	5.884	0.925	28.531	5494	1.26	0.794	0.936	0.226695
32	SCLT1_KAN621-10_3.tif:0005-0536	0.732	87.794	0	441	32.259	38.575	0.721	64.286	12379	1.79	0.559	0.868	0.510786
33	SCLT1_KAN621-10_3.tif:0006-0551	1.065	43.054	0	358	10.071	39.749	0.657	45.835	8826	2.482	0.403	0.878	0.364181
34	SCLT1_KAN621-10_3.tif:0007-0644	1.537	183.541	0	1601	78.064	46.515	0.741	282.133	54328	1.374	0.728	0.857	2.2417
35	SCLT1_KAN621-10_3.tif:0008-0654	0.54	34.76	0	117	54.334	47.159	0.898	18.773	3615	1.128	0.887	0.937	0.149163
36	SCLT1_KAN621-10_3.tif:0009-0671	1.137	126.489	0	924	6.327	48.342	0.817	143.855	27701	1.686	0.593	0.924	1.14301
37	SCLT1_KAN621-10_3.tif:0010-0832	1.257	63.558	0	633	29.648	59.987	0.755	79.876	15381	1.894	0.528	0.9	0.634655
38	SCLT1_KAN621-10_3.tif:0011-0870	1.065	80.629	0	621	51.184	62.709	0.81	85.838	16529	1.722	0.581	0.94	0.682024
39	SCLT1_KAN621-10_3.tif:0012-0896	0.878	61.231	0	378	81.632	64.564	0.792	53.739	10348	1.72	0.582	0.911	0.426982
40	SCLT1_KAN621-10_4.tif:0001-0022	1.283	152.939	0	1150	41.761	1.584	0.896	196.176	37776	1.437	0.696	0.939	1.55872
41	SCLT1_KAN621-10_4.tif:0002-0079	1.059	99.407	0	785	49.773	5.679	0.777	105.312	20279	1.713	0.584	0.874	0.836758
42	SCLT1_KAN621-10_4.tif:0003-0440	0.971	149.262	0	790	78.578	31.733	0.856	144.951	27912	1.361	0.735	0.928	1.15171
43	SCLT1_KAN621-10_4.tif:0004-0526	0.758	21.185	0	88	69.613	37.97	0.956	16.062	3093	1.184	0.845	0.961	0.127624
44	SCLT1_KAN621-10_4.tif:0005-0635	0.971	111.508	0	498	38.757	45.814	0.896	108.287	20852	1.371	0.73	0.947	0.860401
45	SCLT1_KAN621-10_4.tif:0006-0727	1.194	171.052	0	1321	25.062	52.378	0.841	204.309	39342	1.43	0.7	0.924	1.62334
46	SCLT1_KAN621-10_4.tif:0007-0836	0.961	105.254	0	390	76.306	60.265	0.866	101.121	19472	1.356	0.737	0.937	0.803459
47	SCLT1_KAN621-10_4.tif:0008-0901	0.992	100.178	0	405	3.801	64.944	0.829	99.366	19134	1.493	0.67	0.916	0.789513
48	SCLT1_KAN621-10_5.tif:0001-0029	0.93	150.14	0	1015	81.563	2.111	0.951	139.566	26875	1.072	0.933	0.95	1.10892
49	SCLT1_KAN621-10_5.tif:0002-0151	1.106	123.502	0	842	66.408	10.897	0.867	136.611	26306	1.429	0.7	0.959	1.08545
50	SCLT1_KAN621-10_5.tif:0003-0272	1.054	185.724	0	1419	33.002	19.533	0.837	195.792	37702	1.237	0.808	0.931	1.55567
51	SCLT1_KAN621-10_5.tif:0004-0452	1.454	127.893	0	1124	76.195	32.556	0.807	185.967	35810	1.538	0.65	0.906	1.4776
52	SCLT1_KAN621-10_5.tif:0005-0464	0.8	73.136	0	387	27.039	33.515	0.847	58.49	11263	1.243	0.805	0.911	0.464737
53	SCLT1_KAN621-10_5.tif:0006-0610	1.314	129.028	0	1036	68.088	44.06	0.811	169.525	32644	1.22	0.819	0.899	1.34697
54	SCLT1_KAN621-10_5.tif:0007-0874	1.111	117.78	0	786	20.033	63.04	0.805	130.893	25205	1.699	0.589	0.932	1.04002
55	SCLT1_KAN621-10_5.tif:0008-0886	1.314	106.98	0	868	84.887	63.918	0.781	140.558	27066	1.694	0.59	0.913	1.1168
56	SCLT1_KAN621-10_5.tif:0009-0944	1.174	117.77	0	841	36.625	68.06	0.868	138.221	26616	1.271	0.787	0.93	1.09824
57	SCLT1_KAN621-10_5.tif:0010-0994	0.66	19.425	0	102	13.932	71.609	0.878	12.811	2467	1.402	0.713	0.914	0.101794
58	SCLT1_KAN621-10_6.tif:0001-0033	0.867	100.796	0	446	75.518	2.353	0.919	87.416	16833	1.061	0.943	0.938	0.694568
59	SCLT1_KAN621-10_6.tif:0002-0104	1.168	164.164	0	1276	43.899	7.479	0.874	191.819	36937	1.198	0.835	0.916	1.5241
60	SCLT1_KAN621-10_6.tif:0003-0126	0.904	73.218	0	299	86.65	9.13	0.717	66.161	12740	1.812	0.552	0.853	0.525681
61	SCLT1_KAN621-10_6.tif:0004-0140	0.893	89.727	0	442	8.146	10.093	0.806	80.146	15433	1.605	0.623	0.901	0.636801
62	SCLT1_KAN621-10_6.tif:0005-0465	1.002	215.534	0	1252	80.517	33.525	0.857	216.025	41598	1.301	0.769	0.917	1.71643
63	SCLT1_KAN621-10_6.tif:0006-0543	1.101	159.415	0	1146	24.297	39.114	0.807	175.508	33796	1.425	0.702	0.891	1.3945
64	SCLT1_KAN621-10_6.tif:0007-0794	1.174	209.739	0	1300	54.584	57.252	0.836	246.16	47401	1.264	0.791	0.89	1.95587
65	SCLT1_KAN621-10_6.tif:0008-0923	1.142	134.995	0	1033	16.928	66.522	0.87	154.231	29699	1.092	0.916	0.957	1.22545
									AVERAGE	24947				1.02937
									SEM	1543.24
66	SCLT1_KAN621-11_1.tif:0001-0082	1.283	192.551	0	1427	19.227	5.912	0.777	246.986	47560	1.366	0.732	0.885	1.96243
67	SCLT1_KAN621-11_1.tif:0002-0122	0.924	101.837	0	619	48.903	8.818	0.873	94.136	18127	1.455	0.687	0.925	0.747961
68	SCLT1_KAN621-11_1.tif:0003-0194	0.898	219.364	0	1431	65.124	13.984	0.837	197.08	37950	1.448	0.691	0.933	1.5659
69	SCLT1_KAN621-11_1.tif:0004-0334	1.028	147.657	0	1098	29.827	24.082	0.841	151.827	29236	1.649	0.606	0.945	1.20634
70	SCLT1_KAN621-11_1.tif:0005-0439	0.992	25.105	0	162	88.748	31.686	0.886	24.901	4795	1.289	0.776	0.934	0.197853
71	SCLT1_KAN621-11_1.tif:0006-0785	0.893	130.267	0	795	59.242	56.622	0.914	116.358	22406	1.159	0.863	0.93	0.924523
72	SCLT1_KAN621-11_1.tif:0007-0830	0.992	144.984	0	879	33.023	59.785	0.907	143.809	27692	1.069	0.935	0.929	1.14264
73	SCLT1_KAN621-11_2.tif:0001-0137	1.07	218.553	0	1538	12.381	9.931	0.914	233.806	45022	1.118	0.894	0.96	1.85771
74	SCLT1_KAN621-11_2.tif:0002-0255	0.898	89.613	0	528	54.998	18.409	0.877	80.509	15503	1.399	0.715	0.938	0.639689
75	SCLT1_KAN621-11_2.tif:0003-0454	1.335	204.179	0	1414	80.113	32.793	0.855	272.505	52474	1.266	0.79	0.929	2.1652
76	SCLT1_KAN621-11_2.tif:0004-0566	0.909	112.137	0	489	45.037	40.812	0.953	101.91	19624	1.123	0.891	0.943	0.809731
77	SCLT1_KAN621-11_2.tif:0005-0808	0.956	125.19	0	662	3.965	58.271	0.775	119.624	23035	1.4	0.714	0.856	0.950477
78	SCLT1_KAN621-11_2.tif:0006-0882	1.091	90.633	0	615	50.74	63.616	0.866	98.841	19033	1.486	0.673	0.95	0.785345
79	SCLT1_KAN621-11_3.tif:0001-0198	0.55	37.5	0	189	56.249	14.282	0.888	20.643	3975	1.204	0.83	0.946	0.164018
80	SCLT1_KAN621-11_3.tif:0002-0280	0.826	95.239	0	451	75.634	20.193	0.943	78.64	15143	1.269	0.788	0.938	0.624835
81	SCLT1_KAN621-11_3.tif:0003-0514	1.122	230.505	0	1399	49.295	37.131	0.864	258.562	49789	1.205	0.83	0.919	2.05441
82	SCLT1_KAN621-11_3.tif:0004-0667	0.576	42.802	0	143	68.224	48.08	0.976	24.673	4751	1.158	0.863	0.941	0.196037
83	SCLT1_KAN621-11_3.tif:0005-0718	1.091	104.538	0	673	20.271	51.689	0.83	114.005	21953	1.33	0.752	0.925	0.905831
84	SCLT1_KAN621-11_3.tif:0006-0798	0.982	113.307	0	578	7.118	57.474	0.839	111.211	21415	1.421	0.704	0.911	0.883632
85	SCLT1_KAN621-11_4.tif:0001-0262	0.634	78.59	0	259	6.526	18.929	0.94	49.792	9588	1.228	0.814	0.938	0.395623
86	SCLT1_KAN621-11_4.tif:0002-0299	0.644	125.298	0	475	61.245	21.607	0.902	80.686	15537	1.221	0.819	0.95	0.641092
87	SCLT1_KAN621-11_4.tif:0003-0318	1.636	121.876	0	1055	90.205	22.889	0.695	199.37	38391	2.235	0.447	0.922	1.5841
88	SCLT1_KAN621-11_4.tif:0004-0613	1.49	198.965	0	1853	44.128	44.159	0.857	296.544	57103	1.474	0.679	0.938	2.3562
89	SCLT1_KAN621-11_4.tif:0005-0636	0.945	228.126	0	1426	78.765	45.878	0.901	215.614	41519	1.231	0.812	0.953	1.71317
90	SCLT1_KAN621-11_4.tif:0006-0645	1.018	47.117	0	315	22.258	46.477	0.689	47.959	9235	1.751	0.571	0.871	0.381057
91	SCLT1_KAN621-11_5.tif:0001-0305	1.314	121.51	0	1137	41.903	21.98	0.796	159.648	30742	1.465	0.683	0.913	1.26849
92	SCLT1_KAN621-11_5.tif:0002-0379	1.013	150.754	0	787	23.329	27.315	0.78	152.663	29397	1.765	0.567	0.888	1.21299
93	SCLT1_KAN621-11_5.tif:0003-0497	1.309	144.198	0	734	57.665	35.776	0.829	188.709	36338	1.58	0.633	0.947	1.49939
94	SCLT1_KAN621-11_5.tif:0004-0543	1.142	135.9	0	1291	76.657	39.171	0.761	155.265	29898	1.492	0.67	0.876	1.23366
95	SCLT1_KAN621-11_5.tif:0005-0621	1.091	214.343	0	1460	52.983	44.82	0.866	233.754	45012	1.123	0.89	0.933	1.8573
96	SCLT1_KAN621-11_5.tif:0006-0749	1.257	116.541	0	938	30	53.954	0.741	146.462	28203	1.807	0.553	0.888	1.16372
97	SCLT1_KAN621-11_5.tif:0007-0848	1.355	177.188	0	1267	49.659	61.167	0.91	240.162	46246	1.368	0.731	0.954	1.90822
98	SCLT1_KAN621-11_6.tif:0001-0142	1.153	207.901	0	1646	41.018	10.279	0.927	239.685	46154	1.243	0.804	0.939	1.90442
99	SCLT1_KAN621-11_6.tif:0002-0202	1.163	221.518	0	1703	5.407	14.63	0.787	257.684	49620	1.43	0.699	0.909	2.04743
100	SCLT1_KAN621-11_6.tif:0003-0283	1.22	260.081	0	1720	31.286	20.431	0.895	317.4	61119	1.35	0.741	0.94	2.52191
101	SCLT1_KAN621-11_6.tif:0004-0443	1.599	191.247	0	1107	89.515	31.998	0.753	305.897	58904	1.688	0.592	0.875	2.43051
102	SCLT1_KAN621-11_6.tif:0005-0609	1.158	261.794	0	1770	54.783	43.838	0.874	303.176	58380	1.17	0.855	0.935	2.40889
103	SCLT1_KAN621-11_6.tif:0006-0807	1.163	171.812	0	1356	49.05	58.182	0.87	199.863	38486	1.472	0.679	0.926	1.58802
104	SCLT1_KAN621-11_6.tif:0007-0881	1.226	144.076	0	1114	16.24	63.499	0.863	176.577	34002	1.245	0.803	0.924	1.403
									AVERAGE	31880.9				1.31548
									SEM	2627.05
105	SCLT1_KAN621-12_1.tif:0001-0043	0.68	164.099	0	787	50.353	3.135	0.916	111.637	21497	1.124	0.89	0.929	0.887015
106	SCLT1_KAN621-12_1.tif:0002-0075	1.132	117.798	0	761	20.103	5.435	0.88	133.36	25680	1.508	0.663	0.95	1.05962
107	SCLT1_KAN621-12_1.tif:0003-0217	1.127	196.461	0	1396	87.817	15.65	0.803	221.394	42632	1.678	0.596	0.882	1.75909
108	SCLT1_KAN621-12_1.tif:0004-0380	0.691	205.947	0	892	50.763	27.44	0.915	142.245	27391	1.211	0.826	0.971	1.13022
109	SCLT1_KAN621-12_1.tif:0005-0420	0.893	193.89	0	1232	35.865	30.276	0.914	173.186	33349	1.109	0.902	0.935	1.37606
110	SCLT1_KAN621-12_1.tif:0006-0578	1.153	145.405	0	1171	85.127	41.658	0.881	167.635	32280	1.182	0.846	0.91	1.33195
111	SCLT1_KAN621-12_1.tif:0007-0775	0.966	86.634	0	434	82.391	55.872	0.783	83.682	16114	1.668	0.599	0.91	0.6649
112	SCLT1_KAN621-12_1.tif:0008-0793	1.387	215.509	0	1711	30.159	57.2	0.888	298.819	57541	1.226	0.816	0.945	2.37427
113	SCLT1_KAN621-12_1.tif:0009-0816	1.324	150.435	0	1465	61.346	58.813	0.817	199.214	38361	1.421	0.704	0.921	1.58286
114	SCLT1_KAN621-12_1.tif:0010-0904	1.065	159.395	0	940	10.592	65.218	0.845	169.691	32676	1.312	0.762	0.921	1.34829
115	SCLT1_KAN621-12_2.tif:0001-0215	1.371	163.795	0	960	70.233	15.537	0.839	224.562	43242	1.42	0.704	0.921	1.78426
116	SCLT1_KAN621-12_2.tif:0002-0233	1.402	146.093	0	1278	11.395	16.829	0.845	204.844	39445	1.428	0.7	0.9	1.62759
117	SCLT1_KAN621-12_2.tif:0003-0233	1.215	162.308	0	1424	25.159	16.805	0.699	197.236	37980	1.737	0.576	0.833	1.56714
118	SCLT1_KAN621-12_2.tif:0004-0314	1.272	65.722	0	469	87.447	22.557	0.756	83.62	16102	1.479	0.676	0.893	0.664405
119	SCLT1_KAN621-12_2.tif:0005-0328	1.028	145.793	0	1074	47.26	23.654	0.927	149.911	28867	1.341	0.746	0.964	1.19112
120	SCLT1_KAN621-12_2.tif:0006-0352	1.142	158.927	0	1054	58.96	25.347	0.907	181.573	34964	1.103	0.906	0.946	1.44269
121	SCLT1_KAN621-12_2.tif:0007-0417	1.002	190.005	0	1263	6.309	30.084	0.876	190.438	36671	1.052	0.951	0.923	1.51313
122	SCLT1_KAN621-12_2.tif:0008-0563	0.976	131.191	0	1067	13.748	40.598	0.834	128.084	24664	1.398	0.716	0.919	1.01769
123	SCLT1_KAN621-12_2.tif:0009-0579	0.732	52.255	0	178	73.328	41.744	0.867	38.263	7368	1.539	0.65	0.919	0.304021
124	SCLT1_KAN621-12_2.tif:0010-0682	1.381	115.342	0	1368	45.354	49.154	0.803	159.331	30681	1.644	0.608	0.894	1.26597
125	SCLT1_KAN621-12_2.tif:0011-0731	1.314	112.81	0	960	70.526	52.65	0.82	148.218	28541	1.525	0.656	0.91	1.17767
126	SCLT1_KAN621-12_2.tif:0012-0974	0.867	110.665	0	372	23.141	70.153	0.875	95.975	18481	1.336	0.749	0.944	0.762568
127	SCLT1_KAN621-12_3.tif:0001-0078	1.246	237.529	0	1738	24.532	5.683	0.888	296.046	57007	1.371	0.73	0.928	2.35224
128	SCLT1_KAN621-12_3.tif:0002-0277	1.625	100.661	0	1084	2.981	20.056	0.702	163.62	31507	2.219	0.451	0.874	1.30005
129	SCLT1_KAN621-12_3.tif:0003-0373	0.94	93.768	0	380	55.955	26.892	0.867	88.138	16972	1.477	0.677	0.926	0.700303
130	SCLT1_KAN621-12_3.tif:0004-0644	1.439	118.061	0	682	69.668	46.293	0.656	169.831	32703	1.602	0.624	0.833	1.3494
131	SCLT1_KAN621-12_3.tif:0005-0695	0.893	34.663	0	187	19.296	50.097	0.816	30.962	5962	1.742	0.574	0.896	0.246006
132	SCLT1_KAN621-12_3.tif:0006-0723	1.2	153.281	0	961	87.606	52.078	0.862	183.879	35408	1.19	0.841	0.922	1.46101
133	SCLT1_KAN621-12_4.tif:0001-0020	1.2	215.087	0	1694	74.258	1.48	0.862	258.022	49685	1.53	0.653	0.935	2.05012
134	SCLT1_KAN621-12_4.tif:0002-0053	1.189	161.328	0	1234	40.914	3.903	0.864	191.856	36944	1.317	0.759	0.914	1.52439
135	SCLT1_KAN621-12_4.tif:0003-0085	0.872	207.595	0	821	5.797	6.125	0.911	181.116	34876	1.186	0.843	0.968	1.43906
136	SCLT1_KAN621-12_4.tif:0004-0158	1.205	77.681	0	644	18.931	11.389	0.809	93.591	18022	2.032	0.492	0.937	0.743629
137	SCLT1_KAN621-12_4.tif:0005-0166	0.826	7.019	0	49	26.311	11.959	0.896	5.796	1116	1.413	0.708	0.941	0.0460487
138	SCLT1_KAN621-12_4.tif:0006-0171	0.904	134.655	0	765	71.483	12.379	0.882	121.675	23430	1.393	0.718	0.935	0.966775
139	SCLT1_KAN621-12_4.tif:0007-0325	1.257	65.194	0	465	7.52	23.49	0.86	81.932	15777	1.212	0.825	0.925	0.650995
140	SCLT1_KAN621-12_4.tif:0008-0364	0.691	20.203	0	81	42.173	26.248	0.957	13.954	2687	1.343	0.745	0.953	0.110872
141	SCLT1_KAN621-12_4.tif:0009-0430	0.628	152.545	0	520	3.081	31.035	0.944	95.855	18458	1.195	0.837	0.968	0.761619
142	SCLT1_KAN621-12_4.tif:0010-0611	0.997	100.266	0	533	9.506	44.05	0.879	99.973	19251	1.319	0.758	0.943	0.79434
143	SCLT1_KAN621-12_4.tif:0011-0614	1.288	136.448	0	1172	61.644	44.202	0.825	175.731	33839	1.339	0.747	0.91	1.39627
144	SCLT1_KAN621-12_4.tif:0012-0673	0.997	109.693	0	613	24.899	48.54	0.899	109.373	21061	1.337	0.748	0.95	0.869025
145	SCLT1_KAN621-12_4.tif:0013-0739	1.013	70.631	0	338	78.909	53.278	0.847	71.525	13773	1.263	0.792	0.924	0.568305
146	SCLT1_KAN621-12_4.tif:0014-0874	0.935	8.639	0	42	59.3	62.999	0.871	8.075	1555	1.506	0.664	0.952	0.0641629
147	SCLT1_KAN621-12_4.tif:0015-0895	0.898	131.318	0	762	61.842	64.495	0.868	117.978	22718	1.621	0.617	0.93	0.937397
148	SCLT1_KAN621-12_4.tif:0016-1006	1.117	124.684	0	1128	29.899	72.515	0.879	139.213	26807	1.085	0.922	0.919	1.10612
149	SCLT1_KAN621-12_5.tif:0001-0027	1.49	145.01	0	1220	41.165	1.928	0.829	216.128	41618	1.577	0.634	0.92	1.71725
150	SCLT1_KAN621-12_5.tif:0002-0138	1.013	113.821	0	759	71.55	9.991	0.922	115.262	22195	1.239	0.807	0.973	0.915816
151	SCLT1_KAN621-12_5.tif:0003-0308	1.215	70.474	0	431	87.257	22.2	0.866	85.64	16491	1.315	0.76	0.914	0.680456
152	SCLT1_KAN621-12_5.tif:0004-0536	1.194	129.317	0	935	3.168	38.63	0.802	154.46	29743	1.324	0.755	0.895	1.22726
153	SCLT1_KAN621-12_5.tif:0005-0603	1.293	184.478	0	1431	65.138	43.446	0.892	238.547	45935	1.286	0.778	0.954	1.89538
154	SCLT1_KAN621-12_5.tif:0006-0652	0.753	5.628	0	31	41.656	46.992	0.925	4.238	816	1.22	0.82	0.948	0.03367
155	SCLT1_KAN621-12_5.tif:0007-0874	1.418	168.396	0	1385	44.785	62.965	0.824	238.739	45972	1.582	0.632	0.905	1.89691
156	SCLT1_KAN621-12_5.tif:0008-0874	1.132	190.913	0	1159	23.789	63.016	0.899	216.134	41619	1.301	0.769	0.954	1.71729
157	SCLT1_KAN621-12_5.tif:0009-0896	1.226	180.097	0	1355	82.396	64.581	0.856	220.724	42503	1.189	0.841	0.909	1.75377
158	SCLT1_KAN621-12_6.tif:0001-0036	0.982	120.201	0	743	78.841	2.591	0.877	117.978	22718	1.121	0.892	0.924	0.937397
159	SCLT1_KAN621-12_6.tif:0002-0083	0.935	90.744	0	463	62.852	5.978	0.854	84.825	16334	1.105	0.905	0.902	0.673978
160	SCLT1_KAN621-12_6.tif:0003-0271	1.22	82.613	0	537	87.786	19.506	0.72	100.82	19414	1.736	0.576	0.833	0.801066
161	SCLT1_KAN621-12_6.tif:0004-0282	0.826	134.629	0	801	17.736	20.385	0.853	111.165	21406	1.377	0.726	0.922	0.88326
162	SCLT1_KAN621-12_6.tif:0005-0346	1.085	148.976	0	900	0.678	24.938	0.819	161.694	31136	1.453	0.688	0.923	1.28474
163	SCLT1_KAN621-12_6.tif:0006-0348	0.535	8.311	0	53	75.719	25.105	0.918	4.445	856	1.237	0.808	0.932	0.0353205
164	SCLT1_KAN621-12_6.tif:0007-0589	0.795	102.098	0	459	56.794	42.452	0.894	81.122	15621	1.176	0.851	0.936	0.644558
165	SCLT1_KAN621-12_6.tif:0008-0595	0.831	234.294	0	1271	34.464	42.853	0.88	194.675	37487	1.066	0.938	0.92	1.5468
166	SCLT1_KAN621-12_6.tif:0009-0656	0.743	33.769	0	174	10.974	47.318	0.827	25.078	4829	1.755	0.57	0.908	0.199256
167	SCLT1_KAN621-12_6.tif:0010-0883	1.033	125.789	0	856	89.088	63.675	0.864	129.995	25032	1.414	0.707	0.939	1.03288
168	SCLT1_KAN621-12_6.tif:0011-0894	1.205	171.263	0	1004	27.008	64.408	0.876	206.339	39733	1.394	0.717	0.922	1.63947
169	SCLT1_KAN621-12_6.tif:0012-0949	0.66	210.575	0	801	73.18	68.424	0.951	138.88	26743	1.219	0.821	0.955	1.10348
									AVERAGE	26804.4				1.10601
									SEM	1674.4
170	SCLT1_KAN621-13_1.tif:0001-0123	1.018	150.276	0	842	27.137	8.84	0.862	152.959	29454	1.405	0.712	0.918	1.21534
171	SCLT1_KAN621-13_1.tif:0002-0253	0.888	118.561	0	561	31.029	18.272	0.801	105.286	20274	1.525	0.656	0.891	0.836552
172	SCLT1_KAN621-13_1.tif:0003-0277	0.846	184.448	0	732	65.126	19.981	0.897	156.132	30065	1.276	0.783	0.937	1.24055
173	SCLT1_KAN621-13_1.tif:0004-0302	0.769	147.986	0	822	41.263	21.838	0.843	113.74	21902	1.44	0.695	0.922	0.903727
174	SCLT1_KAN621-13_1.tif:0005-0526	0.789	179.809	0	684	78.581	37.929	0.985	141.934	27331	1.139	0.878	0.941	1.12774
175	SCLT1_KAN621-13_1.tif:0006-0587	0.561	163.093	0	481	71.608	42.275	0.878	91.472	17614	1.283	0.78	0.947	0.726794
176	SCLT1_KAN621-13_1.tif:0007-0725	0.836	149.056	0	622	71.938	52.255	0.844	124.625	23998	1.607	0.622	0.942	0.990212
177	SCLT1_KAN621-13_1.tif:0008-0813	0.8	137.422	0	684	47.301	58.61	0.728	109.903	21163	1.484	0.674	0.853	0.873234
178	SCLT1_KAN621-13_2.tif:0001-0115	0.898	115.434	0	707	47.596	8.379	0.81	103.707	19970	1.423	0.703	0.913	0.824008
179	SCLT1_KAN621-13_2.tif:0002-0408	0.576	20.333	0	88	56.022	29.435	0.93	11.721	2257	1.155	0.866	0.965	0.093129
180	SCLT1_KAN621-13_2.tif:0003-0551	1.013	88.518	0	482	68.488	39.743	0.877	89.639	17261	1.412	0.708	0.907	0.712228
181	SCLT1_KAN621-13_2.tif:0004-0597	0.992	171.466	0	1091	17.756	42.989	0.725	170.076	32750	1.658	0.603	0.876	1.35134
182	SCLT1_KAN621-13_2.tif:0005-0846	0.836	105.826	0	610	70.911	60.983	0.844	88.481	17038	1.478	0.677	0.933	0.703027
183	SCLT1_KAN621-13_2.tif:0006-1004	0.888	105.462	0	527	28.663	72.371	0.855	93.653	18034	1.604	0.623	0.961	0.744124
184	SCLT1_KAN621-13_3.tif:0001-0130	0.935	224.511	0	1419	16.897	9.377	0.891	209.865	40412	1.082	0.924	0.94	1.66749
185	SCLT1_KAN621-13_3.tif:0002-0182	0.618	93.866	0	299	78.166	13.132	0.866	58.007	11170	1.439	0.695	0.933	0.4609
186	SCLT1_KAN621-13_3.tif:0003-0402	0.841	288.864	0	1594	83.913	28.934	0.9	243.019	46796	1.103	0.906	0.959	1.93091
187	SCLT1_KAN621-13_3.tif:0004-0493	0.914	183.972	0	1096	27.637	35.554	0.781	168.149	32379	1.464	0.683	0.871	1.33603
188	SCLT1_KAN621-13_3.tif:0005-0810	1.054	163.35	0	1103	47.558	58.384	0.764	172.205	33160	1.729	0.578	0.902	1.36826
189	SCLT1_KAN621-13_3.tif:0006-0873	1.226	181.059	0	1507	58.834	62.964	0.839	221.903	42730	1.48	0.676	0.917	1.76314
190	SCLT1_KAN621-13_4.tif:0001-0098	0.888	201.69	0	1054	37.84	7.066	0.875	179.106	34489	1.274	0.785	0.95	1.42309
191	SCLT1_KAN621-13_4.tif:0002-0125	1.096	142.806	0	748	11.16	9.025	0.75	156.48	30132	1.817	0.55	0.867	1.24332
192	SCLT1_KAN621-13_4.tif:0003-0133	1.08	136.077	0	1054	69.923	9.593	0.739	146.987	28304	1.781	0.561	0.883	1.16789
193	SCLT1_KAN621-13_4.tif:0004-0620	1.361	218.279	0	1982	76.688	44.732	0.718	296.991	57189	1.859	0.538	0.855	2.35975
194	SCLT1_KAN621-13_4.tif:0005-0632	0.961	189.584	0	863	53.653	45.564	0.858	182.139	35073	1.595	0.627	0.916	1.44719
195	SCLT1_KAN621-13_5.tif:0001-0082	1.028	170.813	0	832	27.722	6.008	0.898	175.637	33821	1.118	0.894	0.941	1.39553
196	SCLT1_KAN621-13_5.tif:0002-0311	0.898	165.653	0	999	58.74	22.411	0.821	148.825	28658	1.73	0.578	0.911	1.18249
197	SCLT1_KAN621-13_5.tif:0003-0668	0.883	154.594	0	729	87.944	48.114	0.778	136.481	26281	1.204	0.83	0.876	1.08441
198	SCLT1_KAN621-13_5.tif:0004-0770	0.753	94.414	0	419	37.912	55.542	0.67	71.094	13690	1.89	0.529	0.836	0.564881
199	SCLT1_KAN621-13_5.tif:0005-0798	0.634	182.041	0	709	4.153	57.55	0.913	115.335	22209	1.291	0.775	0.946	0.916394
200	SCLT1_KAN621-13_5.tif:0006-0856	0.987	219.247	0	1474	84.27	61.712	0.941	216.331	41657	1.208	0.828	0.972	1.71886
201	SCLT1_KAN621-13_5.tif:0007-0996	1.122	230.088	0	1339	89.383	71.804	0.929	258.094	49699	1.108	0.902	0.949	2.05069
202	SCLT1_KAN621-13_6.tif:0001-0087	0.737	174.183	0	810	65.957	6.21	0.77	128.447	24734	1.51	0.662	0.916	1.02058
203	SCLT1_KAN621-13_6.tif:0002-0204	0.556	282.121	0	1155	53.251	14.734	0.881	156.766	30187	1.334	0.75	0.995	1.24558
204	SCLT1_KAN621-13_6.tif:0003-0249	0.737	155.451	0	791	7.903	17.963	0.744	114.634	22074	1.59	0.629	0.877	0.910824
205	SCLT1_KAN621-13_6.tif:0004-0780	0.805	199.529	0	905	7.202	56.281	0.905	160.608	30927	1.253	0.798	0.942	1.27612
206	SCLT1_KAN621-13_6.tif:0005-0793	0.649	131.56	0	489	59.286	57.14	0.92	85.401	16445	1.139	0.878	0.977	0.678558
									AVERAGE	27873.7				1.15013
									SEM	1835.18
207	SCLT1_KAN621-14_1.tif:0001-0049	0.836	203.708	0	1151	43.158	3.549	0.931	170.32	32797	1.247	0.802	0.947	1.35328
208	SCLT1_KAN621-14_1.tif:0002-0091	0.805	441.355	0	2608	24.23	6.556	0.939	355.263	68410	1.187	0.842	0.969	2.82275
209	SCLT1_KAN621-14_1.tif:0003-0313	1.148	109.887	0	871	6.604	22.53	0.801	126.116	24285	1.42	0.704	0.893	1.00205
210	SCLT1_KAN621-14_1.tif:0004-0406	0.857	21.824	0	300	62.502	29.271	0.877	18.701	3601	1.221	0.819	0.917	0.148585
211	SCLT1_KAN621-14_1.tif:0005-0488	1.091	120.819	0	917	40.447	35.147	0.884	131.761	25372	1.409	0.71	0.933	1.04691
212	SCLT1_KAN621-14_1.tif:0006-0641	1.184	126.368	0	792	87.252	46.223	0.795	149.625	28812	1.62	0.617	0.905	1.18885
213	SCLT1_KAN621-14_1.tif:0007-0703	0.966	297.656	0	1661	48.174	50.728	0.921	287.513	55364	1.162	0.861	0.966	2.28445
214	SCLT1_KAN621-14_1.tif:0008-0776	1.137	191.247	0	1640	87.419	55.949	0.817	217.505	41883	1.372	0.729	0.911	1.72819
215	SCLT1_KAN621-14_1.tif:0009-0842	1.117	128.893	0	921	38.935	60.639	0.86	143.912	27712	1.156	0.865	0.915	1.14346
216	SCLT1_KAN621-14_2.tif:0001-0044	1.226	173.496	0	1391	80.368	3.199	0.856	212.633	40945	1.524	0.656	0.931	1.68948
217	SCLT1_KAN621-14_2.tif:0002-0063	0.758	11.959	0	136	42.484	4.564	0.931	9.067	1746	1.235	0.81	0.964	0.0720439
218	SCLT1_KAN621-14_2.tif:0003-0299	0.919	139.028	0	822	45.851	21.574	0.856	127.793	24608	1.334	0.75	0.939	1.01538
219	SCLT1_KAN621-14_2.tif:0004-0308	1.184	124.939	0	845	41.981	22.15	0.811	147.932	28486	1.343	0.744	0.896	1.1754
220	SCLT1_KAN621-14_2.tif:0005-0385	0.618	5.437	0	26	5.119	27.779	0.956	3.36	647	1.139	0.878	0.956	0.0266967
221	SCLT1_KAN621-14_2.tif:0006-0508	0.639	44.447	0	170	32.173	36.629	0.976	28.391	5467	1.214	0.824	0.95	0.225581
222	SCLT1_KAN621-14_2.tif:0007-0855	0.883	145.618	0	856	39.56	61.7	0.842	128.556	24755	1.357	0.737	0.939	1.02145
223	SCLT1_KAN621-14_2.tif:0008-0965	0.68	32.985	0	213	90.923	69.546	0.805	22.44	4321	1.787	0.56	0.91	0.178294
224	SCLT1_KAN621-14_3.tif:0001-0140	0.997	101.479	0	603	51.095	10.152	0.891	101.183	19484	1.254	0.797	0.93	0.803954
225	SCLT1_KAN621-14_3.tif:0002-0161	1.023	119.553	0	577	77.888	11.635	0.894	122.309	23552	1.103	0.907	0.934	0.971809
226	SCLT1_KAN621-14_3.tif:0003-0282	1.278	166.211	0	1619	85.619	20.36	0.794	212.337	40888	1.664	0.601	0.918	1.68713
227	SCLT1_KAN621-14_3.tif:0004-0322	0.758	172.144	0	715	15.583	23.228	0.917	130.519	25133	1.273	0.785	0.983	1.03704
228	SCLT1_KAN621-14_3.tif:0005-0336	0.898	159.434	0	950	22.394	24.18	0.758	143.237	27582	1.363	0.734	0.894	1.1381
229	SCLT1_KAN621-14_3.tif:0006-0427	0.582	16	0	122	51.121	30.81	0.967	9.306	1792	1.103	0.907	0.97	0.073942
230	SCLT1_KAN621-14_3.tif:0007-0916	0.914	63.562	0	224	29.584	66.017	0.817	58.096	11187	1.75	0.571	0.907	0.461601
231	SCLT1_KAN621-14_3.tif:0008-0961	0.81	103.872	0	366	76.049	69.26	0.809	84.15	16204	1.485	0.674	0.884	0.668614
232	SCLT1_KAN621-14_4.tif:0001-0375	1.096	139.664	0	891	45.992	27.051	0.813	153.037	29469	1.761	0.568	0.9	1.21596
233	SCLT1_KAN621-14_4.tif:0002-0496	1.049	75.723	0	412	23.412	35.786	0.71	79.434	15296	1.426	0.701	0.84	0.631148
234	SCLT1_KAN621-14_4.tif:0003-0764	1.049	183.129	0	1016	66.323	55.099	0.869	192.105	36992	1.252	0.798	0.916	1.52637
235	SCLT1_KAN621-14_4.tif:0004-0888	1.091	101.271	0	541	5.83	64.001	0.774	110.443	21267	1.701	0.588	0.905	0.877525
236	SCLT1_KAN621-14_5.tif:0001-0163	1.184	206.329	0	1581	67.158	11.713	0.843	244.301	47043	1.427	0.701	0.907	1.9411
237	SCLT1_KAN621-14_5.tif:0002-0272	0.966	106.995	0	557	15.522	19.619	0.818	103.349	19901	1.657	0.604	0.905	0.821161
238	SCLT1_KAN621-14_5.tif:0003-0618	0.867	223.719	0	1074	21.915	44.535	0.875	194.021	37361	1.361	0.735	0.954	1.5416
239	SCLT1_KAN621-14_5.tif:0004-0629	1.085	79.761	0	491	62.78	45.349	0.802	86.57	16670	1.563	0.64	0.897	0.687842
240	SCLT1_KAN621-14_5.tif:0005-0792	1.122	112.505	0	861	17.89	57.101	0.687	126.199	24301	1.958	0.511	0.845	1.00271
241	SCLT1_KAN621-14_5.tif:0006-0980	0.872	119.685	0	691	35.103	70.687	0.787	104.419	20107	1.207	0.829	0.884	0.829661
242	SCLT1_KAN621-14_6.tif:0001-0032	1.065	115.839	0	487	33.04	2.26	0.882	123.322	23747	1.335	0.749	0.921	0.979855
243	SCLT1_KAN621-14_6.tif:0002-0176	0.737	50.789	0	173	62.758	12.714	0.941	37.453	7212	1.294	0.773	0.966	0.297584
244	SCLT1_KAN621-14_6.tif:0003-0291	0.945	194.533	0	1279	46.325	21	0.872	183.863	35405	1.037	0.965	0.917	1.46089
245	SCLT1_KAN621-14_6.tif:0004-0685	0.971	86.636	0	489	37.261	49.381	0.876	84.134	16201	1.292	0.774	0.942	0.66849
246	SCLT1_KAN621-14_6.tif:0005-0878	1.179	86.22	0	489	63.244	63.383	0.671	101.64	19572	2.214	0.452	0.876	0.807585
247	SCLT1_KAN621-14_6.tif:0006-0963	0.867	189.461	0	1118	52.754	69.439	0.941	164.311	31640	1.142	0.876	0.957	1.30554
248	SCLT1_KAN621-14_6.tif:0007-0997	1.023	129.67	0	553	13.672	71.89	0.863	132.659	25545	1.368	0.731	0.952	1.05405
									AVERAGE	26411.6				1.0898
									SEM	1743.52
249	SCLT1_KAN621-15_1.tif:0001-0068	1.262	95.494	0	729	31.747	4.92	0.767	120.507	23205	1.917	0.522	0.88	0.957491
250	SCLT1_KAN621-15_1.tif:0002-0136	0.685	40.523	0	118	74.281	9.777	0.771	27.778	5349	1.903	0.526	0.892	0.220712
251	SCLT1_KAN621-15_1.tif:0003-0158	0.945	85.577	0	490	43.313	11.377	0.783	80.883	15575	1.65	0.606	0.881	0.64266
252	SCLT1_KAN621-15_1.tif:0004-0320	1.22	53.672	0	394	76.227	23.038	0.849	65.501	12613	1.259	0.794	0.938	0.520441
253	SCLT1_KAN621-15_1.tif:0005-0380	0.665	6.461	0	29	76.239	27.405	0.848	4.295	827	1.789	0.559	0.952	0.0341239
254	SCLT1_KAN621-15_1.tif:0006-0498	1.49	61.474	0	761	60.198	35.873	0.713	91.623	17643	2.05	0.488	0.876	0.72799
255	SCLT1_KAN621-15_1.tif:0007-0566	0.982	72.069	0	444	16.299	40.834	0.786	70.736	13621	1.735	0.576	0.917	0.562034
256	SCLT1_KAN621-15_1.tif:0008-0813	0.55	15.849	0	60	66.986	58.627	0.944	8.724	1680	1.047	0.955	0.946	0.0693206
257	SCLT1_KAN621-15_1.tif:0009-0907	0.68	47.855	0	146	9.486	65.38	0.916	32.556	6269	1.178	0.849	0.946	0.258673
258	SCLT1_KAN621-15_1.tif:0010-0949	0.846	27.393	0	119	40.448	68.341	0.826	23.187	4465	1.656	0.604	0.929	0.184236
259	SCLT1_KAN621-15_1.tif:0011-1008	0.821	11.816	0	58	11.57	72.694	0.686	9.696	1867	1.813	0.552	0.838	0.0770367
260	SCLT1_KAN621-15_2.tif:0001-0035	0.706	8.324	0	72	29.958	2.516	0.951	5.879	1132	1.082	0.924	0.951	0.0467089
261	SCLT1_KAN621-15_2.tif:0002-0190	1.314	78.447	0	669	64.271	13.756	0.811	103.068	19847	1.248	0.802	0.917	0.818933
262	SCLT1_KAN621-15_2.tif:0003-0322	1.402	66.837	0	526	38.998	23.226	0.812	93.716	18046	1.063	0.94	0.912	0.744619
263	SCLT1_KAN621-15_2.tif:0004-0361	0.53	52.196	0	203	20.087	26.045	0.968	27.648	5324	1.056	0.947	0.94	0.21968
264	SCLT1_KAN621-15_2.tif:0005-0499	0.992	135.56	0	878	76.758	36.013	0.928	134.461	25892	1.219	0.82	0.936	1.06836
265	SCLT1_KAN621-15_2.tif:0006-0656	1.049	60.168	0	443	45.817	47.306	0.888	63.118	12154	1.145	0.873	0.924	0.501502
266	SCLT1_KAN621-15_2.tif:0007-0673	0.95	67.098	0	404	84.231	48.498	0.877	63.767	12279	1.344	0.744	0.936	0.50666
267	SCLT1_KAN621-15_2.tif:0008-0760	0.961	12.395	0	118	37.581	54.776	0.858	11.908	2293	1.115	0.896	0.907	0.0946144
268	SCLT1_KAN621-15_2.tif:0009-0940	0.909	26.583	0	184	56.185	67.762	0.838	24.159	4652	1.397	0.716	0.902	0.191952
269	SCLT1_KAN621-15_3.tif:0001-0132	1.142	58.114	0	357	16.486	9.507	0.873	66.394	12785	1.608	0.622	0.942	0.527538
270	SCLT1_KAN621-15_3.tif:0002-0364	0.696	8.97	0	81	6.564	26.256	0.937	6.242	1202	1.202	0.832	0.947	0.0495973
271	SCLT1_KAN621-15_3.tif:0003-0377	0.976	52.34	0	234	83.305	27.183	0.872	51.101	9840	1.467	0.681	0.933	0.406021
272	SCLT1_KAN621-15_3.tif:0004-0530	0.883	24.065	0	145	25.301	38.207	0.882	21.245	4091	1.269	0.788	0.932	0.168804
273	SCLT1_KAN621-15_3.tif:0005-0711	0.852	4.921	0	25	46.184	51.254	0.902	4.191	807	1.549	0.646	0.962	0.0332987
274	SCLT1_KAN621-15_3.tif:0006-0924	1.059	58.809	0	366	77.405	66.613	0.761	62.302	11997	1.81	0.552	0.889	0.495024
275	SCLT1_KAN621-15_4.tif:0001-0045	0.795	13.641	0	86	70.273	3.239	0.903	10.838	2087	1.187	0.843	0.959	0.0861144
276	SCLT1_KAN621-15_4.tif:0002-0172	0.561	21.713	0	79	17.946	12.396	0.933	12.178	2345	1.347	0.743	0.969	0.0967601
277	SCLT1_KAN621-15_4.tif:0003-0316	0.779	18.567	0	129	53.906	22.803	0.922	14.463	2785	1.289	0.776	0.946	0.114915
278	SCLT1_KAN621-15_4.tif:0004-0468	0.8	70.591	0	407	22.955	33.748	0.818	56.455	10871	1.425	0.702	0.883	0.448562
279	SCLT1_KAN621-15_4.tif:0005-0737	0.956	18	0	75	42.086	53.126	0.885	17.2	3312	1.646	0.607	0.92	0.136661
280	SCLT1_KAN621-15_4.tif:0006-0846	0.81	35.891	0	218	84.058	61.003	0.925	29.076	5599	1.422	0.703	0.934	0.231028
281	SCLT1_KAN621-15_4.tif:0007-0878	0.784	29.139	0	181	24.33	63.256	0.953	22.85	4400	1.169	0.856	0.947	0.181554
282	SCLT1_KAN621-15_5.tif:0001-0122	1.272	88.939	0	511	5.894	8.795	0.779	113.159	21790	1.328	0.753	0.891	0.899105
283	SCLT1_KAN621-15_5.tif:0002-0150	0.852	57.14	0	409	20.459	10.813	0.868	48.665	9371	1.279	0.782	0.962	0.386669
284	SCLT1_KAN621-15_5.tif:0003-0409	0.831	20.131	0	114	44.754	29.492	0.925	16.727	3221	1.382	0.724	0.941	0.132906
285	SCLT1_KAN621-15_5.tif:0004-0412	1.07	108.636	0	553	63.957	29.682	0.867	116.217	22379	1.26	0.793	0.93	0.923409
286	SCLT1_KAN621-15_5.tif:0005-0523	1.013	31.579	0	204	35.038	37.717	0.858	31.979	6158	1.428	0.7	0.911	0.254093
287	SCLT1_KAN621-15_5.tif:0006-0553	0.81	26.987	0	157	4.132	39.863	0.858	21.863	4210	1.415	0.707	0.926	0.173714
288	SCLT1_KAN621-15_5.tif:0007-0557	0.592	7.623	0	38	10.679	40.184	0.743	4.513	869	2.417	0.414	0.983	0.0358569
289	SCLT1_KAN621-15_5.tif:0008-0786	1.246	45.554	0	462	71.266	56.682	0.906	56.777	10933	1.482	0.675	0.949	0.451121
290	SCLT1_KAN621-15_5.tif:0009-0946	1.361	86.271	0	908	64.757	68.212	0.803	117.381	22603	1.55	0.645	0.913	0.932651
291	SCLT1_KAN621-15_5.tif:0010-0959	1.013	7.349	0	43	90.227	69.125	0.858	7.442	1433	1.34	0.746	0.915	0.0591289
292	SCLT1_KAN621-15_5.tif:0011-0996	0.53	5.275	0	30	66.349	71.812	0.881	2.794	538	1.134	0.881	0.932	0.0221991
293	SCLT1_KAN621-15_6.tif:0001-0046	1.215	91.944	0	647	39.561	3.393	0.839	111.731	21515	1.014	0.986	0.923	0.887758
294	SCLT1_KAN621-15_6.tif:0002-0276	1.823	83.601	0	910	78.204	19.823	0.699	152.388	29344	2.278	0.439	0.901	1.2108
295	SCLT1_KAN621-15_6.tif:0003-0551	1.345	68.645	0	648	69.59	39.762	0.823	92.329	17779	1.401	0.714	0.92	0.733602
296	SCLT1_KAN621-15_6.tif:0004-0753	1.236	56.912	0	513	23.841	54.319	0.777	70.341	13545	1.56	0.641	0.883	0.558898
297	SCLT1_KAN621-15_6.tif:0005-0818	0.836	13.404	0	74	44.651	58.939	0.94	11.207	2158	1.119	0.894	0.958	0.089044
									AVERAGE	9483.67				0.391318
									SEM	1144.6
298	SCLT1_KAN621-16_1.tif:0001-0100	1.023	179.239	0	1240	48.003	7.221	0.848	183.37	35310	1.36	0.735	0.914	1.45697
299	SCLT1_KAN621-16_1.tif:0002-0105	1.137	83.607	0	523	56.282	7.53	0.81	95.087	18310	1.256	0.796	0.892	0.755512
300	SCLT1_KAN621-16_1.tif:0003-0112	0.815	149.796	0	710	65.851	8.098	0.941	122.132	23518	1.103	0.907	0.957	0.970406
301	SCLT1_KAN621-16_1.tif:0004-0271	1.075	121.517	0	721	13.21	19.489	0.835	130.628	25154	1.711	0.585	0.947	1.03791
302	SCLT1_KAN621-16_1.tif:0005-0298	0.525	104.624	0	362	20.175	21.438	0.735	54.876	10567	1.735	0.576	0.845	0.436019
303	SCLT1_KAN621-16_1.tif:0006-0324	0.639	103.74	0	362	48.379	23.378	0.837	66.265	12760	1.548	0.646	0.908	0.526507
304	SCLT1_KAN621-16_1.tif:0007-0363	1.168	138.6	0	931	29.81	26.182	0.806	161.948	31185	1.43	0.699	0.905	1.28676
305	SCLT1_KAN621-16_1.tif:0008-0418	0.997	214.057	0	1425	70.356	30.148	0.92	213.433	41099	1.23	0.813	0.943	1.69584
306	SCLT1_KAN621-16_1.tif:0009-0672	0.654	69.032	0	219	51.159	48.405	0.835	45.17	8698	1.528	0.654	0.937	0.358899
307	SCLT1_KAN621-16_1.tif:0010-0731	1.35	58.658	0	300	13.693	52.63	0.768	79.201	15251	1.445	0.692	0.903	0.629291
308	SCLT1_KAN621-16_1.tif:0011-0748	1.039	152.805	0	866	64.211	53.856	0.817	158.708	30561	1.611	0.621	0.903	1.26102
309	SCLT1_KAN621-16_1.tif:0012-0792	1.423	185.511	0	1464	64.838	57.142	0.81	263.968	50830	1.216	0.823	0.918	2.09736
310	SCLT1_KAN621-16_1.tif:0013-0812	0.93	127.536	0	765	16.622	58.542	0.809	118.554	22829	1.61	0.621	0.945	0.941977
311	SCLT1_KAN621-16_1.tif:0014-1009	1.252	126.73	0	1038	38.946	72.716	0.857	158.609	30542	1.153	0.867	0.908	1.26023
312	SCLT1_KAN621-16_2.tif:0001-0342	0.831	193.825	0	1046	49.037	24.629	0.911	161.05	31012	1.176	0.851	0.955	1.27963
313	SCLT1_KAN621-16_2.tif:0002-0422	1.298	84.184	0	572	79.715	30.438	0.848	109.295	21046	1.512	0.661	0.928	0.868406
314	SCLT1_KAN621-16_2.tif:0003-0424	0.758	114.356	0	371	0.85	30.553	0.907	86.705	16696	1.265	0.791	0.954	0.688915
315	SCLT1_KAN621-16_2.tif:0004-0641	1.272	113.616	0	929	16.386	46.182	0.896	144.556	27836	1.315	0.76	0.953	1.14858
316	SCLT1_KAN621-16_2.tif:0005-0732	1.065	71.22	0	423	41.438	52.752	0.838	75.82	14600	1.082	0.924	0.899	0.602429
317	SCLT1_KAN621-16_2.tif:0006-0757	1.194	147.191	0	950	68.938	54.586	0.802	175.809	33854	1.251	0.8	0.893	1.39689
318	SCLT1_KAN621-16_2.tif:0007-0772	0.8	97.416	0	391	84.796	55.662	0.899	77.908	15002	1.256	0.796	0.939	0.619017
319	SCLT1_KAN621-16_3.tif:0001-0094	1.257	206.186	0	1374	25.192	6.8	0.805	259.122	49897	1.37	0.73	0.9	2.05886
320	SCLT1_KAN621-16_3.tif:0002-0256	0.654	119.429	0	337	63.101	18.49	0.725	78.146	15048	1.156	0.865	0.854	0.620915
321	SCLT1_KAN621-16_3.tif:0003-0319	1.117	148.042	0	841	32.254	22.943	0.793	165.293	31829	1.594	0.628	0.919	1.31334
322	SCLT1_KAN621-16_3.tif:0004-0364	1.117	111.005	0	693	83.485	26.221	0.825	123.94	23866	1.322	0.756	0.901	0.984766
323	SCLT1_KAN621-16_3.tif:0005-0596	0.711	134.285	0	512	59.646	42.965	0.907	95.538	18397	1.337	0.748	0.961	0.759102
324	SCLT1_KAN621-16_3.tif:0006-0757	0.639	4.366	0	18	2.987	54.497	0.764	2.789	537	1.289	0.776	0.857	0.0221578
325	SCLT1_KAN621-16_3.tif:0007-0823	0.732	48.582	0	287	65.147	59.297	0.824	35.573	6850	1.41	0.709	0.895	0.282647
326	SCLT1_KAN621-16_3.tif:0008-0841	0.93	78.112	0	489	34.341	60.637	0.77	72.611	13982	1.725	0.58	0.882	0.576929
327	SCLT1_KAN621-16_4.tif:0001-0197	1.028	192.843	0	1367	4.391	14.242	0.831	198.29	38183	1.402	0.713	0.952	1.57552
328	SCLT1_KAN621-16_4.tif:0002-0305	0.821	135.032	0	385	27.77	21.996	0.828	110.796	21335	1.446	0.691	0.911	0.880331
329	SCLT1_KAN621-16_4.tif:0003-0366	1.158	198.435	0	1434	82.981	26.376	0.856	229.802	44251	1.072	0.933	0.92	1.8259
330	SCLT1_KAN621-16_4.tif:0004-0443	0.556	5.495	0	23	79.934	31.943	0.679	3.054	588	2.681	0.373	0.947	0.0242622
331	SCLT1_KAN621-16_4.tif:0005-0596	1.392	178.5	0	1093	21.566	42.947	0.727	248.43	47838	1.423	0.703	0.856	1.97391
332	SCLT1_KAN621-16_4.tif:0006-0708	1.345	194.946	0	1626	68.662	51.02	0.779	262.207	50491	1.727	0.579	0.92	2.08337
333	SCLT1_KAN621-16_4.tif:0007-0940	1.168	147.262	0	1124	72.331	67.748	0.882	172.07	33134	1.26	0.794	0.939	1.36718
334	SCLT1_KAN621-16_5.tif:0001-0093	0.878	102.124	0	572	7.471	6.729	0.825	89.629	17259	1.459	0.685	0.942	0.712146
335	SCLT1_KAN621-16_5.tif:0002-0170	1.262	121.601	0	1000	80.333	12.245	0.8	153.452	29549	1.298	0.77	0.902	1.21926
336	SCLT1_KAN621-16_5.tif:0003-0355	1.101	143.028	0	703	5.461	25.589	0.824	157.467	30322	1.417	0.706	0.895	1.25115
337	SCLT1_KAN621-16_5.tif:0004-0418	0.976	83.622	0	498	67.327	30.133	0.809	81.641	15721	1.581	0.633	0.885	0.648684
338	SCLT1_KAN621-16_5.tif:0005-0431	0.909	169.829	0	989	58.454	31.057	0.908	154.34	29720	1.274	0.785	0.938	1.22632
339	SCLT1_KAN621-16_5.tif:0006-0494	1.148	169.086	0	952	30.083	35.678	0.866	194.058	37368	1.152	0.868	0.921	1.54189
340	SCLT1_KAN621-16_5.tif:0007-0508	0.691	8.91	0	46	86.01	36.616	0.957	6.154	1185	1.258	0.795	0.947	0.0488958
341	SCLT1_KAN621-16_5.tif:0008-0733	0.888	87.76	0	353	19.271	52.819	0.875	77.934	15007	1.156	0.865	0.947	0.619223
342	SCLT1_KAN621-16_6.tif:0001-0031	0.649	6.408	0	70	58.749	2.311	0.749	4.16	801	1.485	0.673	0.845	0.0330511
343	SCLT1_KAN621-16_6.tif:0002-0154	0.935	81.45	0	429	40.49	11.083	0.782	76.137	14661	1.826	0.548	0.914	0.604946
344	SCLT1_KAN621-16_6.tif:0003-0280	1.096	87.526	0	517	3.728	20.204	0.794	95.907	18468	1.721	0.581	0.911	0.762032
345	SCLT1_KAN621-16_6.tif:0004-0307	1.563	140.691	0	1255	33.365	22.163	0.729	219.919	42348	2.074	0.482	0.938	1.74738
346	SCLT1_KAN621-16_6.tif:0005-0351	0.815	106.153	0	385	75.336	25.358	0.941	86.549	16666	1.136	0.881	0.957	0.687677
347	SCLT1_KAN621-16_6.tif:0006-0731	1.163	67.375	0	461	31.921	52.699	0.87	78.375	15092	1.176	0.85	0.914	0.62273
348	SCLT1_KAN621-16_6.tif:0007-0779	1.106	82.385	0	466	3.438	56.209	0.878	91.129	17548	1.168	0.856	0.934	0.724071
349	SCLT1_KAN621-16_6.tif:0008-0860	1.21	125.67	0	992	79.23	61.97	0.761	152.061	29281	1.722	0.581	0.896	1.2082
350	SCLT1_KAN621-16_6.tif:0009-0878	1.236	170.521	0	1203	48.614	63.269	0.863	210.759	40584	1.152	0.868	0.924	1.67459
									AVERAGE	24235.2				1
									SEM	1816.73

## Sheet: IF summary
Exp. number	Cell line	Gene induced	Culture condition, fixation condition	rabbit-Alexa488	mouse IgG1-Alexa568	mouse IgG2b-Alexa647	Nuclear stain	Date	Replicate
KAN621-1	RPE-BFP-Cas9 pMCB306 (pool)		Serum starved for 24 hours. Fixed in 100% methanol at -20C for 5 minutes.	FBF1, 11531-1-AP,Proteintech, 1:1000	CEP170, Invitrogen, 41-3200, 1:1000	Ac-Tub, 6B-11, Santa Cruz, 1:1000	DAPI	2021-03-04	No.6
KAN621-2	RPE-BFP-Cas9 CEP164KO (pool)		Serum starved for 24 hours. Fixed in 100% methanol at -20C for 5 minutes.	FBF1, 11531-1-AP,Proteintech, 1:1000	CEP170, Invitrogen, 41-3200, 1:1000	Ac-Tub, 6B-11, Santa Cruz, 1:1000	DAPI	2021-03-04	No.6
KAN621-3	RPE-BFP-Cas9 CEP83 KO (pool)		Serum starved for 24 hours. Fixed in 100% methanol at -20C for 5 minutes.	FBF1, 11531-1-AP,Proteintech, 1:1000	CEP170, Invitrogen, 41-3200, 1:1000	Ac-Tub, 6B-11, Santa Cruz, 1:1000	DAPI	2021-03-04	No.6
KAN621-4	RPE-BFP-Cas9 SCLT1 KO (pool)		Serum starved for 24 hours. Fixed in 100% methanol at -20C for 5 minutes.	FBF1, 11531-1-AP,Proteintech, 1:1000	CEP170, Invitrogen, 41-3200, 1:1000	Ac-Tub, 6B-11, Santa Cruz, 1:1000	DAPI	2021-03-04	No.6
KAN621-5	RPE-BFP-Cas9 FBF1 KO (pool)		Serum starved for 24 hours. Fixed in 100% methanol at -20C for 5 minutes.	FBF1, 11531-1-AP,Proteintech, 1:1000	CEP170, Invitrogen, 41-3200, 1:1000	Ac-Tub, 6B-11, Santa Cruz, 1:1000	DAPI	2021-03-04	No.6
KAN621-6	RPE-BFP-Cas9 CEP89KO (pool)		Serum starved for 24 hours. Fixed in 100% methanol at -20C for 5 minutes.	FBF1, 11531-1-AP,Proteintech, 1:1000	CEP170, Invitrogen, 41-3200, 1:1000	Ac-Tub, 6B-11, Santa Cruz, 1:1000	DAPI	2021-03-04	No.6
KAN621-7	RPE-BFP-Cas9 CCDC92 KO (pool)		Serum starved for 24 hours. Fixed in 100% methanol at -20C for 5 minutes.	FBF1, 11531-1-AP,Proteintech, 1:1000	CEP170, Invitrogen, 41-3200, 1:1000	Ac-Tub, 6B-11, Santa Cruz, 1:1000	DAPI	2021-03-04	No.6
KAN621-8	RPE-BFP-Cas9 ANKRD26 KO (pool)		Serum starved for 24 hours. Fixed in 100% methanol at -20C for 5 minutes.	FBF1, 11531-1-AP,Proteintech, 1:1000	CEP170, Invitrogen, 41-3200, 1:1000	Ac-Tub, 6B-11, Santa Cruz, 1:1000	DAPI	2021-03-04	No.6
KAN621-9	RPE-BFP-Cas9 TTBK2 KO (pool)		Serum starved for 24 hours. Fixed in 100% methanol at -20C for 5 minutes.	FBF1, 11531-1-AP,Proteintech, 1:1000	CEP170, Invitrogen, 41-3200, 1:1000	Ac-Tub, 6B-11, Santa Cruz, 1:1000	DAPI	2021-03-04	No.6
KAN621-10	RPE-BFP-Cas9 INPP5E KO (pool)		Serum starved for 24 hours. Fixed in 100% methanol at -20C for 5 minutes.	FBF1, 11531-1-AP,Proteintech, 1:1000	CEP170, Invitrogen, 41-3200, 1:1000	Ac-Tub, 6B-11, Santa Cruz, 1:1000	DAPI	2021-03-04	No.6
KAN621-11	RPE-BFP-Cas9 Kiz KO (pool)		Serum starved for 24 hours. Fixed in 100% methanol at -20C for 5 minutes.	FBF1, 11531-1-AP,Proteintech, 1:1000	CEP170, Invitrogen, 41-3200, 1:1000	Ac-Tub, 6B-11, Santa Cruz, 1:1000	DAPI	2021-03-04	No.6
KAN621-12	RPE-BFP-Cas9 LRRC45 KO (pool)		Serum starved for 24 hours. Fixed in 100% methanol at -20C for 5 minutes.	FBF1, 11531-1-AP,Proteintech, 1:1000	CEP170, Invitrogen, 41-3200, 1:1000	Ac-Tub, 6B-11, Santa Cruz, 1:1000	DAPI	2021-03-04	No.6
KAN621-13	RPE-BFP-Cas9 NCS1 KO (pool)		Serum starved for 24 hours. Fixed in 100% methanol at -20C for 5 minutes.	FBF1, 11531-1-AP,Proteintech, 1:1000	CEP170, Invitrogen, 41-3200, 1:1000	Ac-Tub, 6B-11, Santa Cruz, 1:1000	DAPI	2021-03-04	No.6
KAN621-14	RPE-BFP-Cas9 C3orf14 KO (pool)		Serum starved for 24 hours. Fixed in 100% methanol at -20C for 5 minutes.	FBF1, 11531-1-AP,Proteintech, 1:1000	CEP170, Invitrogen, 41-3200, 1:1000	Ac-Tub, 6B-11, Santa Cruz, 1:1000	DAPI	2021-03-04	No.6
KAN621-15	RPE-BFP-Cas9 FOP KO (pool)		Serum starved for 24 hours. Fixed in 100% methanol at -20C for 5 minutes.	FBF1, 11531-1-AP,Proteintech, 1:1000	CEP170, Invitrogen, 41-3200, 1:1000	Ac-Tub, 6B-11, Santa Cruz, 1:1000	DAPI	2021-03-04	No.6
KAN621-16	RPE-BFP-Cas9 sgSafe (pool)		Serum starved for 24 hours. Fixed in 100% methanol at -20C for 5 minutes.	FBF1, 11531-1-AP,Proteintech, 1:1000	CEP170, Invitrogen, 41-3200, 1:1000	Ac-Tub, 6B-11, Santa Cruz, 1:1000	DAPI	2021-03-04	No.6

## Sheet: After ROUT
sgSafe	CEP164KO	CEP83KO	SCLT1KO	FBF1KO	CEP89KO	CCDC92KO	ANKRD26KO	TTBK2KO	INPP5EKO	KIZ KO	LRRC45 KO	NCS1 KO	C3orf14 KO
1.45697	0.0304928	0.0441094		0.959101	0.674102	0.900714	0.199833	0.130471	1.11115	1.96243	0.887015	1.21534	1.35328
0.755512	0.0543837	0.026903	0.142314	0.136702	1.0951	1.75621	0.758194	0.109881	0.556669	0.747961	1.05962	0.836552	2.82275
0.970406	0.785799	0.0853717	0.094862	0.0751386	0.0499274	0.200287	1.22516	0.123085	1.25062	1.5659	1.75909	1.24055	1.00205
1.03791	1.89518	0.0461312	0.0524856	0.696549	1.22504	0.0651944	1.18864	0.1981	1.33281	1.20634	1.13022	0.903727	0.148585
0.436019	1.11408	0.0937892	0.11409	0.0413861	1.31557	0.0359807	0.21803	0.396943	1.3865	0.197853	1.37606	1.12774	1.04691
0.526507	0.645507	0.0758813	0.068908	0.704471	0.650706	1.41868	1.25607	0.592403	0.585429	0.924523	1.33195	0.726794	1.18885
1.28676	0.321062	0.047204		0.0699808	1.09172	2.67677	0.93195	0.457392	1.39747	1.14264	0.6649	0.990212	2.28445
1.69584	0.747879	0.147224	0.138311	1.19855	1.00498	1.96689	0.716272	0.0583861	0.450873	1.85771	2.37427	0.873234	1.72819
0.358899	0.11636	0.0556628	0.0491021	0.23371	1.0486	1.27146	0.92869	0.119165	1.01386	0.639689	1.58286	0.824008	1.14346
0.629291	1.04328	0.0916023	0.0805027	0.599665	0.87245	0.790338	0.275715	0.0563643	1.02685	2.1652	1.34829	0.093129	1.68948
1.26102	0.972016	0.118629	0.0437793	0.600077	1.2814	0.066226	1.31416	0.493497	1.04455	0.809731	1.78426	0.712228	0.0720439
2.09736	0.587864	0.147471	0.0564881	0.422031	1.79916	1.81538	1.79858	0.199998	1.42755	0.950477	1.62759	1.35134	1.01538
0.941977	0.182421	0.0294613	0.116648	0.720151	1.3213	0.367564	0.172765	0.0826071	0.634903	0.785345	1.56714	0.703027	1.1754
1.26023	0.100721	0.123374	0.128491	0.0335462	1.12696	1.6403	0.0190219	0.491681	1.98533	0.164018	0.664405	0.744124	0.0266967
1.27963	1.32175	0.0542186	0.147678	0.382997	1.14536	1.34804	1.23428	0.791328	1.23279	0.624835	1.19112	1.66749	0.225581
0.868406	0.948909	0.0373011	0.100515	0.0818644	1.81191	0.13336	1.2573	0.194098	0.58708	2.05441	1.44269	0.4609	1.02145
0.688915	0.231977	0.0590463	0.111202	1.04707	1.19281	1.41699	0.84534	0.243241	1.74948	0.196037	1.51313	1.93091	0.178294
1.14858	2.16412	0.059624	0.0934178	0.0886727	1.11912	1.48008	1.17003	0.572432	0.346108	0.905831	1.01769	1.33603	0.803954
0.602429	0.265688	0.0781508	0.10134	0.829578	1.01976	1.69803	1.3945	0.637956	1.07311	0.883632	0.304021	1.36826	0.971809
1.39689	1.53306	0.0962236	0.0822357	0.421205	2.29748	1.0021	0.221826	0.835025	1.71796	0.395623	1.26597	1.76314	1.68713
0.619017	0.424383	0.060408	0.0291312	0.281821	1.13488	0.107901	1.45103	0.0536822	1.65437	0.641092	1.17767	1.42309	1.03704
2.05886	1.6155	0.0505463	0.126882	0.12651	0.90319	0.874925	1.17519	0.0535997	1.27418	1.5841	0.762568	1.24332	1.1381
0.620915	0.90286	0.0894566	0.0417987	0.041221	0.852025	1.77312	1.30104	0.746352	1.99103	2.3562	2.35224	1.16789	0.073942
1.31334	1.55352	0.0498448	0.140209	0.0837624	1.38579	1.44162	1.31577	0.387865	0.501295	1.71317	1.30005	2.35975	0.461601
0.984766	0.804862	0.0401482		0.723245	1.49893	1.11602	1.08177	0.199379	1.34981	0.381057	0.700303	1.44719	0.668614
0.759102	1.43861	0.0304928		0.453761	1.70442	0.762816	0.841297	0.107983	1.43572	1.26849	1.3494	1.39553	1.21596
0.0221578	0.827433	0.0513715	0.109881	0.18011	0.520524	0.768593	1.44707	0.330346	0.453968	1.21299	0.246006	1.18249	0.631148
0.282647	0.965991	0.0904882		0.443157	2.01075	2.02936	1.68862	0.527497	0.402844	1.49939	1.46101	1.08441	1.52637
0.576929	0.991491	0.0328035	0.0809979	0.0534759	0.079925	1.11982	1.18831	0.210231	0.60049	1.23366	2.05012	0.564881	0.877525
1.57552	0.0543424	0.124571	0.0909008	0.0688255	1.26052	1.2545	0.0602017	0.37953	1.13397	1.8573	1.52439	0.916394	1.9411
0.880331	0.278149	0.0316069	0.0572308	0.19154	1.51094	0.621493	2.12088	0.224095	0.226695	1.16372	1.43906	1.71886	0.821161
1.8259	0.483264	0.091561		0.103857	0.176768	0.353205	0.746105	0.026738	0.510786	1.90822	0.743629	2.05069	1.5416
0.0242622	1.96095	0.0480706		0.1726	0.360962	0.261603	0.235112	0.110253	0.364181	1.90442	0.0460487	1.02058	0.687842
1.97391	0.630364	0.0479055	0.111202	0.101753	0.967477	1.04332	0.542434	0.159974	2.2417	2.04743	0.966775	1.24558	1.00271
2.08337	0.96694	0.0341239	0.0649468	0.0559517	1.1357	0.695063	1.81723	0.276581	0.149163	2.52191	0.650995	0.910824	0.829661
1.36718	0.720646	0.0671337	0.0390341	0.0754274	0.237918	1.45181	0.144047	0.0898692	1.14301	2.43051	0.110872	1.27612	0.979855
0.712146	0.781425	0.0839275	0.0782745	0.606225	1.2337	0.060408	0.888955	1.03515	0.634655	2.40889	0.761619	0.678558	0.297584
1.21926	1.06255	0.0914372	0.0781508	0.219268	1.28004	0.0239734	0.803831	0.276705	0.682024	1.58802	0.79434		1.46089
1.25115	0.522463	0.136124	0.122549	0.283719	0.922006	0.659247	1.57461	0.269278	0.426982	1.403	1.39627		0.66849
0.648684	1.01773	0.0837624	0.19059	0.485863	0.293169	1.4233	1.03065	0.362365	1.55872		0.869025		0.807585
1.22632	1.24558	0.061357	0.19187	0.106663	0.9506	1.72555	0.3223	0.833127	0.836758		0.568305		1.30554
1.54189	0.489164	0.0357744	0.251824	0.595992	0.48248	0.853799	0.0708061	0.498201	1.15171		0.0641628		1.05405
0.0488958	1.54729	0.0479468	0.0559104	0.569502	1.03907	1.67983	0.888336	0.396531	0.127624		0.937397
0.619223	0.923326	0.0733643	0.127459	0.0484007	1.61538	1.83646	1.95979	1.09481	0.860401		1.10612
0.0330511		0.0937892	0.0861969	1.09217	1.73916	1.60176	0.733478	0.226695	1.62334		1.71725
0.604946		0.0484832	0.0667211	0.235731	0.997433	0.216462	1.43032	0.53282	0.803459		0.915816
0.762032		0.0930465	0.0330098	0.0465439	0.295933	2.04479	0.709918	0.601728	0.789513		0.680456
1.74738		0.0919324	0.101505	0.0916023	1.1586	1.20478	1.17602	0.162532	1.10892		1.22726
0.687677		0.116195	0.0565293	0.800695	0.0585924	0.373671		0.0785221	1.08545		1.89538
0.62273		0.12911	0.0535997	0.139219	1.39553	1.64319		0.340785	1.55567		0.03367
0.724071			0.090612	0.151433	0.787573	1.77618			1.4776		1.89691
1.2082			0.123663	0.688461	0.77961	1.92088			0.464737		1.71729
1.67459			0.14776		0.694733	1.15101			1.34697		1.75377
			0.0989057		1.29456				1.04002		0.937397
			0.0569832		1.37127				1.1168		0.673978
					1.11511				1.09824		0.801066
					1.91275				0.101794		0.88326
					1.81001				0.694568		1.28474
									1.5241		0.0353205
									0.525681		0.644558
									0.636801		1.5468
									1.71643		0.199256
									1.3945		1.03288
									1.95587		1.63947
									1.22545		1.10348
