# Supplementary material for: A hierarchical pathway for assembly of the distal appendages that organize primary cilia
Source: eLife. 2025 Jan 30;14:e85999. doi: 10.7554/eLife.85999 (PMC11984956; doi:10.7554/eLife.85999)
Supplement: Figure 2—source data 6. [file elife-85999-fig2-data6.xlsx]

## Sheet: Raw data
	Label	Area	Mean	Min	Max	X	Y	Circ	IntDen	RawIntDen	AR	Round	Solidity
561	CEP89_KAN613-1_1.tif:0001-0162	0.748	83.403	0	338	54.347	11.674	0.713	62.37	12010	1.804	0.554	0.847	1.66119
562	CEP89_KAN613-1_1.tif:0002-0313	0.909	80.549	0	470	91.915	22.575	0.835	73.203	14096	1.589	0.629	0.97	1.94972
563	CEP89_KAN613-1_1.tif:0003-0365	1.163	126.277	0	792	149.383	26.275	0.87	146.893	28286	1.412	0.708	0.929	3.91244
564	CEP89_KAN613-1_1.tif:0004-0391	0.753	48.579	0	266	180.158	28.217	0.767	36.581	7044	1.833	0.546	0.924	0.974306
565	CEP89_KAN613-1_1.tif:0005-0470	0.888	67.819	0	391	93.368	33.884	0.866	60.225	11597	1.328	0.753	0.927	1.60406
566	CEP89_KAN613-1_1.tif:0006-0571	0.888	82.509	0	451	150.513	41.163	0.827	73.27	14109	1.502	0.666	0.94	1.95152
567	CEP89_KAN613-1_1.tif:0007-0643	0.727	104.064	0	465	54.357	46.367	0.917	75.659	14569	1.057	0.946	0.927	2.01514
568	CEP89_KAN613-1_1.tif:0008-0651	0.711	116.358	0	505	60.522	46.872	0.809	82.784	15941	1.662	0.602	0.938	2.20491
569	CEP89_KAN613-1_1.tif:0009-0659	0.883	61.488	0	319	125.96	47.52	0.807	54.284	10453	1.508	0.663	0.888	1.44583
570	CEP89_KAN613-1_1.tif:0010-0723	0.415	36.487	0	148	117.982	52.154	0.806	15.159	2919	1.942	0.515	0.947	0.403748
571	CEP89_KAN613-1_1.tif:0011-0820	0.976	72.266	0	415	97.598	59.045	0.806	70.554	13586	1.655	0.604	0.957	1.87918
572	CEP89_KAN613-1_1.tif:0012-0821	1.122	115.375	0	671	76.906	59.163	0.864	129.418	24921	1.347	0.742	0.937	3.447
573	CEP89_KAN613-1_1.tif:0013-1029	1.153	78.613	0	549	150.5	74.153	0.881	90.631	17452	1.173	0.852	0.921	2.41391
574	CEP89_KAN613-1_1.tif:0014-1048	0.696	67.47	0	304	118.296	75.531	0.771	46.951	9041	1.784	0.561	0.924	1.25053
575	CEP89_KAN613-1_1.tif:0015-1113	0.644	7.726	0	33	176.386	80.224	0.721	4.975	958	2.288	0.437	0.954	0.132508
576	CEP89_KAN613-1_1.tif:0016-1266	0.701	31.993	0	194	170.064	91.22	0.809	22.429	4319	1.37	0.73	0.891	0.597392
577	CEP89_KAN613-1_1.tif:0017-1282	0.706	92.235	0	374	83.479	92.45	0.832	65.143	12544	1.589	0.63	0.958	1.73505
578	CEP89_KAN613-1_1.tif:0018-1341	0.841	57.512	0	288	63.074	96.675	0.829	48.385	9317	1.128	0.887	0.923	1.2887
579	CEP89_KAN613-1_1.tif:0019-1362	0.592	17.228	0	70	115.534	98.183	0.927	10.199	1964	1.016	0.984	0.979	0.271655
580	CEP89_KAN613-1_1.tif:0020-1560	0.779	77.88	0	407	93.364	112.412	0.778	60.666	11682	1.591	0.629	0.87	1.61582
581	CEP89_KAN613-1_1.tif:0021-1594	0.613	6.822	0	39	110.704	114.913	0.803	4.18	805	1.898	0.527	0.933	0.111345
582	CEP89_KAN613-1_1.tif:0022-1694	0.961	94.303	0	529	157.677	122.107	0.866	90.6	17446	1.187	0.842	0.932	2.41308
583	CEP89_KAN613-1_1.tif:0023-1925	0.743	66.713	0	281	54.775	138.719	0.889	49.543	9540	1.332	0.751	0.944	1.31955
584	CEP89_KAN613-1_1.tif:0024-1957	1.013	61.282	0	295	112.777	141.075	0.885	62.058	11950	1.392	0.718	0.933	1.65289
585	CEP89_KAN613-1_1.tif:0025-2088	0.8	25.5	0	108	80.16	150.453	0.859	20.393	3927	1.579	0.633	0.906	0.543172
586	CEP89_KAN613-1_2.tif:0001-0212	0.691	89.15	0	373	159.34	15.319	0.93	61.575	11857	1.205	0.83	0.94	1.64003
587	CEP89_KAN613-1_2.tif:0002-0318	0.457	66.659	0	196	113.507	22.903	0.809	30.463	5866	1.52	0.658	0.85	0.811369
588	CEP89_KAN613-1_2.tif:0003-0319	0.53	53.941	0	297	169.873	23.031	0.702	28.573	5502	1.862	0.537	0.843	0.761021
589	CEP89_KAN613-1_2.tif:0004-0346	0.514	9.444	0	43	33.813	24.916	0.952	4.856	935	1.166	0.858	0.961	0.129327
590	CEP89_KAN613-1_2.tif:0005-0358	0.893	75.192	0	365	81.95	25.822	0.884	67.163	12933	1.357	0.737	0.915	1.78886
591	CEP89_KAN613-1_2.tif:0006-0412	0.457	76.25	0	269	27.369	29.717	0.917	34.846	6710	1.181	0.846	0.957	0.928108
592	CEP89_KAN613-1_2.tif:0007-0549	1.127	101.194	0	830	87.713	39.593	0.816	114.036	21959	1.382	0.724	0.902	3.03731
593	CEP89_KAN613-1_2.tif:0008-0862	1.002	88.275	0	601	116.888	62.125	0.904	88.476	17037	1.183	0.845	0.937	2.35651
594	CEP89_KAN613-1_2.tif:0009-0935	0.691	50.241	0	207	70.439	67.436	0.826	34.701	6682	1.532	0.653	0.911	0.924235
595	CEP89_KAN613-1_2.tif:0010-1067	0.441	116.376	0	456	128.948	76.883	0.929	51.371	9892	1.185	0.844	0.977	1.36823
596	CEP89_KAN613-1_2.tif:0011-1086	0.831	29.575	0	117	156.062	78.299	0.902	24.574	4732	1.244	0.804	0.936	0.654517
597	CEP89_KAN613-1_2.tif:0012-1100	0.592	7.018	0	37	92.944	79.277	0.904	4.155	800	1.185	0.844	0.919	0.110654
598	CEP89_KAN613-1_2.tif:0013-1175	0.982	80.455	0	513	118.471	84.7	0.858	78.967	15206	1.169	0.856	0.906	2.10325
599	CEP89_KAN613-1_2.tif:0014-1281	0.514	126.626	0	410	78.245	92.296	0.894	65.101	12536	1.318	0.759	0.971	1.73394
600	CEP89_KAN613-1_2.tif:0015-1397	0.93	138.726	0	761	163.342	100.685	0.886	128.956	24832	1.279	0.782	0.952	3.43469
601	CEP89_KAN613-1_2.tif:0016-1498	0.691	61.82	0	278	103.117	107.988	0.957	42.698	8222	1.257	0.795	0.957	1.13724
602	CEP89_KAN613-1_2.tif:0017-1581	1.033	54.638	0	360	115.861	113.99	0.875	56.465	10873	1.395	0.717	0.921	1.50392
603	CEP89_KAN613-1_2.tif:0018-1585	0.717	92.841	0	411	120.333	114.257	0.88	66.535	12812	1.296	0.772	0.917	1.77212
604	CEP89_KAN613-1_2.tif:0019-1673	0.945	116.615	0	630	135.623	120.547	0.892	110.219	21224	1.223	0.817	0.924	2.93564
605	CEP89_KAN613-1_2.tif:0020-1744	0.753	40.262	0	190	31.198	125.688	0.891	30.318	5838	1.191	0.839	0.915	0.807496
606	CEP89_KAN613-1_2.tif:0021-1750	0.914	64.432	0	359	86.96	126.108	0.843	58.89	11340	1.205	0.83	0.898	1.56852
607	CEP89_KAN613-1_2.tif:0022-1799	0.535	36.456	0	174	165.236	129.631	0.918	19.5	3755	1.256	0.796	0.941	0.519381
608	CEP89_KAN613-1_2.tif:0023-2056	0.893	49.721	0	259	100.447	148.199	0.798	44.412	8552	1.308	0.764	0.869	1.18289
609	CEP89_KAN613-1_2.tif:0024-2073	0.514	86.384	0	273	43.479	149.405	0.701	44.412	8552	1.774	0.564	0.832	1.18289
610	CEP89_KAN613-1_2.tif:0025-2125	0.478	17.054	0	47	99.336	153.169	0.927	8.148	1569	1.301	0.769	0.974	0.21702
611	CEP89_KAN613-1_2.tif:0026-2193	0.649	63.904	0	366	129.962	158.065	0.815	41.483	7988	1.53	0.654	0.943	1.10488
612	CEP89_KAN613-1_3.tif:0001-0063	0.743	34.133	0	220	103.971	4.574	0.889	25.348	4881	1.404	0.712	0.944	0.675126
613	CEP89_KAN613-1_3.tif:0002-0182	1.142	87.714	0	611	77.344	13.116	0.888	100.212	19297	1.361	0.735	0.959	2.66911
614	CEP89_KAN613-1_3.tif:0003-0341	0.831	77.569	0	398	141.05	24.601	0.74	64.452	12411	1.771	0.565	0.907	1.71665
615	CEP89_KAN613-1_3.tif:0004-0360	0.956	79.402	0	616	110.474	25.959	0.85	75.872	14610	1.265	0.79	0.948	2.02081
616	CEP89_KAN613-1_3.tif:0005-0365	0.53	29.5	0	104	64.512	26.342	0.881	15.626	3009	1.552	0.644	0.94	0.416196
617	CEP89_KAN613-1_3.tif:0006-0468	0.509	53.133	0	179	54.181	33.73	0.873	27.041	5207	1.393	0.718	0.912	0.720217
618	CEP89_KAN613-1_3.tif:0007-0551	0.68	55.069	0	290	72.046	39.768	0.765	37.463	7214	1.724	0.58	0.87	0.99782
619	CEP89_KAN613-1_3.tif:0008-0654	0.483	12.914	0	86	115.08	47.165	0.677	6.237	1201	2.46	0.406	0.838	0.166119
620	CEP89_KAN613-1_3.tif:0009-0681	1.023	71.665	0	466	142.448	49.086	0.785	73.317	14118	1.666	0.6	0.927	1.95276
621	CEP89_KAN613-1_3.tif:0010-0720	0.634	14.607	0	77	173.088	51.899	0.94	9.254	1782	1.411	0.709	0.949	0.246481
622	CEP89_KAN613-1_3.tif:0011-0838	0.836	79.596	0	330	75.944	60.378	0.844	66.55	12815	1.446	0.692	0.923	1.77253
623	CEP89_KAN613-1_3.tif:0012-0862	0.919	22.333	0	174	142.217	62.059	0.829	20.529	3953	1.178	0.849	0.917	0.546768
624	CEP89_KAN613-1_3.tif:0013-0919	0.841	39.29	0	172	108.552	66.263	0.849	33.054	6365	1.404	0.713	0.928	0.880389
625	CEP89_KAN613-1_3.tif:0014-1145	0.483	27.151	0	237	57.292	82.58	0.779	13.113	2525	1.37	0.73	0.873	0.349251
626	CEP89_KAN613-1_3.tif:0015-1226	0.717	53.978	0	222	105.543	88.348	0.965	38.684	7449	1.116	0.896	0.958	1.03032
627	CEP89_KAN613-1_3.tif:0016-1257	0.872	69.804	0	385	113.271	90.609	0.729	60.9	11727	1.84	0.543	0.855	1.62205
628	CEP89_KAN613-1_3.tif:0017-1442	1.028	63.222	0	377	57.186	103.941	0.71	65.008	12518	1.271	0.787	0.841	1.73145
629	CEP89_KAN613-1_3.tif:0018-1450	0.452	59.529	0	252	174.617	104.489	0.971	26.895	5179	1.163	0.86	0.946	0.716345
630	CEP89_KAN613-1_3.tif:0019-1590	0.836	91.522	0	490	140.747	114.598	0.67	76.521	14735	2.215	0.451	0.852	2.0381
631	CEP89_KAN613-1_3.tif:0020-1733	0.488	87.851	0	239	127.276	124.924	0.966	42.885	8258	1.213	0.824	0.945	1.14222
632	CEP89_KAN613-1_3.tif:0021-1810	0.872	56.399	0	303	33.55	130.437	0.805	49.205	9475	1.329	0.753	0.88	1.31056
633	CEP89_KAN613-1_3.tif:0022-1832	0.846	83.914	0	359	179.319	132.013	0.826	71.032	13678	1.419	0.705	0.916	1.8919
634	CEP89_KAN613-1_3.tif:0023-1832	0.8	48.539	0	244	85.596	132.043	0.788	38.819	7475	1.739	0.575	0.922	1.03392
635	CEP89_KAN613-1_4.tif:0001-0090	0.582	55.304	0	262	145.291	6.488	0.815	32.166	6194	1.529	0.654	0.892	0.856737
636	CEP89_KAN613-1_4.tif:0002-0248	0.872	69.845	0	375	63.775	17.912	0.832	60.936	11734	1.567	0.638	0.921	1.62301
637	CEP89_KAN613-1_4.tif:0003-0497	0.618	9.437	0	51	142.762	35.829	0.891	5.832	1123	1.41	0.709	0.933	0.15533
638	CEP89_KAN613-1_4.tif:0004-0574	0.592	89.947	0	335	106.961	41.289	0.698	53.251	10254	1.951	0.513	0.884	1.4183
639	CEP89_KAN613-1_4.tif:0005-0583	1.111	70.57	0	482	73.899	42.032	0.718	78.427	15102	2.147	0.466	0.89	2.08887
640	CEP89_KAN613-1_4.tif:0006-0778	0.431	66.265	0	218	193.289	56.091	0.908	28.562	5500	1.394	0.717	0.976	0.760744
641	CEP89_KAN613-1_4.tif:0007-0781	0.961	60.746	0	305	70.379	56.297	0.866	58.361	11238	1.255	0.797	0.923	1.55441
642	CEP89_KAN613-1_4.tif:0008-0796	0.935	85.25	0	418	164.919	57.379	0.871	79.689	15345	1.252	0.799	0.942	2.12248
643	CEP89_KAN613-1_4.tif:0009-0922	0.878	67.899	0	359	22.2	66.474	0.799	59.591	11475	1.79	0.559	0.929	1.58719
644	CEP89_KAN613-1_4.tif:0010-0976	0.831	74.644	0	440	125.849	70.32	0.83	62.022	11943	1.573	0.636	0.917	1.65192
645	CEP89_KAN613-1_4.tif:0011-1050	0.665	93.125	0	551	92.912	75.618	0.804	61.902	11920	1.327	0.754	0.914	1.64874
646	CEP89_KAN613-1_4.tif:0012-1072	0.878	46.574	0	298	191.747	77.349	0.668	40.875	7871	2.054	0.487	0.869	1.08869
647	CEP89_KAN613-1_4.tif:0013-1110	0.81	88.391	0	385	68.994	80.028	0.879	71.608	13789	1.2	0.833	0.918	1.90726
648	CEP89_KAN613-1_4.tif:0014-1125	0.878	75.32	0	423	157.836	81.051	0.788	66.104	12729	1.884	0.531	0.971	1.76064
649	CEP89_KAN613-1_4.tif:0015-1255	0.919	93.277	0	594	105.265	90.454	0.856	85.739	16510	1.333	0.75	0.934	2.28362
650	CEP89_KAN613-1_4.tif:0016-1285	0.737	30.937	0	108	152.701	92.619	0.789	22.813	4393	1.365	0.732	0.879	0.607627
651	CEP89_KAN613-1_4.tif:0017-1298	0.675	33.9	0	137	171.256	93.563	0.861	22.886	4407	1.557	0.642	0.935	0.609564
652	CEP89_KAN613-1_4.tif:0018-1467	0.639	81.203	0	260	181.517	105.741	0.921	51.869	9988	1.347	0.742	0.946	1.38151
653	CEP89_KAN613-1_4.tif:0019-1636	0.774	27.577	0	198	109.295	117.886	0.87	21.339	4109	1.252	0.799	0.931	0.568345
654	CEP89_KAN613-1_4.tif:0020-1783	0.81	108.468	0	466	137.578	128.512	0.889	87.873	16921	1.526	0.655	0.948	2.34046
655	CEP89_KAN613-1_4.tif:0021-1796	0.8	99.948	0	503	118.675	129.4	0.868	79.933	15392	1.055	0.948	0.901	2.12898
656	CEP89_KAN613-1_4.tif:0022-1961	0.945	48.407	0	222	63.213	141.339	0.905	45.752	8810	1.48	0.675	0.933	1.21857
657	CEP89_KAN613-1_4.tif:0023-1975	0.587	17.097	0	82	165.186	142.293	0.846	10.033	1932	1.604	0.623	0.915	0.267229
										9971.56				1.37924
658	CEP89_KAN613-2_1.tif:0001-0096	0.649	7.168	0	41	91.977	6.986	0.884	4.653	896	1.233	0.811	0.951	0.123932
659	CEP89_KAN613-2_1.tif:0002-0246	1.506	48.359	0	437	117.226	17.71	0.671	72.829	14024	1.511	0.662	0.807	1.93976
660	CEP89_KAN613-2_1.tif:0003-0384	0.462	11.618	0	56	158.484	27.727	0.927	5.37	1034	1.244	0.804	0.957	0.14302
661	CEP89_KAN613-2_1.tif:0004-0430	0.54	20.788	0	137	56.591	30.973	0.811	11.228	2162	1.109	0.902	0.897	0.299042
662	CEP89_KAN613-2_1.tif:0005-0703	1.381	72.523	0	652	114.069	50.613	0.688	100.181	19291	1.549	0.646	0.844	2.66828
663	CEP89_KAN613-2_1.tif:0006-0932	1.174	49.881	0	329	134.278	67.152	0.692	58.542	11273	1.877	0.533	0.848	1.55925
664	CEP89_KAN613-2_1.tif:0007-0995	0.436	3.774	0	19	94.122	71.727	0.951	1.646	317	1.103	0.907	0.971	0.0438465
665	CEP89_KAN613-2_1.tif:0008-1095	0.774	8.027	0	42	89.811	78.923	0.94	6.211	1196	1.265	0.79	0.937	0.165427
666	CEP89_KAN613-2_1.tif:0009-1343	0.499	212.469	0	1018	174.688	96.769	0.936	105.925	20397	1.044	0.957	0.985	2.82126
667	CEP89_KAN613-2_1.tif:0010-1483	0.426	13.72	0	43	79.203	106.898	0.962	5.842	1125	1.369	0.731	0.97	0.155607
668	CEP89_KAN613-2_1.tif:0011-1649	0.826	14.579	0	160	156.47	118.844	0.91	12.038	2318	1.352	0.74	0.922	0.320619
669	CEP89_KAN613-2_1.tif:0012-1718	0.447	150.942	0	779	116.269	123.805	0.974	67.412	12981	1.117	0.895	0.977	1.7955
670	CEP89_KAN613-2_1.tif:0013-1773	0.571	16.645	0	122	144.35	127.794	0.938	9.509	1831	1.22	0.82	0.94	0.253259
671	CEP89_KAN613-2_1.tif:0014-1813	0.691	44.323	0	199	90.861	130.644	0.867	30.614	5895	1.362	0.734	0.974	0.81538
672	CEP89_KAN613-2_1.tif:0015-1931	0.852	60.213	0	334	148.009	139.197	0.859	51.282	9875	1.567	0.638	0.945	1.36588
673	CEP89_KAN613-2_1.tif:0016-1967	0.81	11.231	0	137	128.846	141.799	0.889	9.098	1752	1.189	0.841	0.954	0.242332
674	CEP89_KAN613-2_1.tif:0017-2063	1.428	51.676	0	467	113.103	148.673	0.752	73.8	14211	2.103	0.475	0.929	1.96563
675	CEP89_KAN613-2_2.tif:0001-0528	0.525	8.198	0	75	51.013	38.083	0.972	4.3	828	1.105	0.905	0.967	0.114527
676	CEP89_KAN613-2_2.tif:0002-0586	0.753	51.876	0	305	63.135	42.304	0.735	39.063	7522	1.684	0.594	0.855	1.04042
677	CEP89_KAN613-2_2.tif:0003-0790	0.514	96.737	0	350	100.496	56.947	0.855	49.735	9577	1.643	0.609	0.943	1.32466
678	CEP89_KAN613-2_2.tif:0004-0794	0.639	6.244	0	29	63.57	57.254	0.932	3.988	768	1.144	0.874	0.972	0.106228
679	CEP89_KAN613-2_2.tif:0005-1097	1.007	63.067	0	362	115.069	79.084	0.767	63.538	12235	1.44	0.695	0.904	1.69231
680	CEP89_KAN613-2_2.tif:0006-1235	1.137	72.297	0	584	133.118	88.913	0.743	82.223	15833	1.308	0.764	0.846	2.18998
681	CEP89_KAN613-2_2.tif:0007-1432	0.556	15.57	0	133	102.191	103.222	0.913	8.652	1666	1.421	0.704	0.934	0.230436
682	CEP89_KAN613-2_2.tif:0008-1637	0.509	3.653	0	22	22.312	118.014	0.943	1.859	358	1.11	0.901	0.961	0.0495175
683	CEP89_KAN613-2_2.tif:0009-1921	0.452	70.253	0	239	89.859	138.422	0.938	31.741	6112	1.174	0.852	0.935	0.845395
684	CEP89_KAN613-2_2.tif:0010-2187	0.743	46.035	0	292	83.556	157.615	0.749	34.186	6583	1.728	0.579	0.885	0.910542
685	CEP89_KAN613-2_3.tif:0001-0184	0.509	65.541	0	251	74.421	13.306	0.774	33.356	6423	1.756	0.57	0.912	0.888411
686	CEP89_KAN613-2_3.tif:0002-0206	0.576	99.036	0	412	142.929	14.828	0.817	57.088	10993	1.722	0.581	0.949	1.52052
687	CEP89_KAN613-2_3.tif:0003-0423	0.654	18.786	0	182	62.441	30.491	0.932	12.292	2367	1.344	0.744	0.93	0.327397
688	CEP89_KAN613-2_3.tif:0004-0679	0.535	24.291	0	166	170.929	48.892	0.803	12.993	2502	1.391	0.719	0.892	0.34607
689	CEP89_KAN613-2_3.tif:0005-0749	0.447	9.663	0	46	81.31	54.006	0.927	4.316	831	1.259	0.794	0.94	0.114942
690	CEP89_KAN613-2_3.tif:0006-0868	0.639	66.236	0	369	122.405	62.619	0.651	42.309	8147	2.146	0.466	0.834	1.12687
691	CEP89_KAN613-2_3.tif:0007-1008	1.018	39.776	0	307	167.013	72.692	0.808	40.486	7796	1.129	0.886	0.893	1.07832
692	CEP89_KAN613-2_3.tif:0008-1014	0.857	18.782	0	123	139.801	73.013	0.856	16.094	3099	1.277	0.783	0.917	0.428645
693	CEP89_KAN613-2_3.tif:0009-1507	0.566	23.624	0	109	32.096	108.663	0.865	13.372	2575	1.38	0.725	0.908	0.356167
694	CEP89_KAN613-2_3.tif:0010-1693	0.566	7.716	0	45	126.101	122.071	0.84	4.367	841	1.579	0.633	0.901	0.116325
695	CEP89_KAN613-2_3.tif:0011-1929	0.493	77.842	0	311	156.255	139.065	0.772	38.403	7395	1.532	0.653	0.896	1.02286
696	CEP89_KAN613-2_4.tif:0001-0189	0.608	15.068	0	127	123.268	13.606	0.94	9.156	1763	1.2	0.833	0.959	0.243853
697	CEP89_KAN613-2_4.tif:0002-0564	0.525	39.069	0	194	163.084	40.66	0.929	20.492	3946	1.426	0.701	0.948	0.5458
698	CEP89_KAN613-2_4.tif:0003-0579	1.075	70.541	0	635	116.036	41.767	0.772	75.83	14602	1.633	0.612	0.885	2.01971
699	CEP89_KAN613-2_4.tif:0004-0618	0.499	72.031	0	310	149.333	44.6	0.866	35.911	6915	1.182	0.846	0.937	0.956463
700	CEP89_KAN613-2_4.tif:0005-0693	0.893	47.041	0	275	78.333	49.892	0.686	42.018	8091	1.958	0.511	0.869	1.11912
701	CEP89_KAN613-2_4.tif:0006-0852	0.675	48.915	0	182	110.004	61.389	0.962	33.023	6359	1.196	0.836	0.942	0.879559
702	CEP89_KAN613-2_4.tif:0007-0920	1.033	59.01	0	396	177.604	66.333	0.728	60.983	11743	1.733	0.577	0.871	1.62426
703	CEP89_KAN613-2_4.tif:0008-1585	0.478	26.717	0	142	79.112	114.256	0.761	12.765	2458	1.711	0.584	0.84	0.339984
704	CEP89_KAN613-2_4.tif:0009-1641	0.53	21.912	0	69	117.081	118.282	0.938	11.607	2235	1.303	0.768	0.932	0.309139
705	CEP89_KAN613-2_4.tif:0010-1670	0.66	42.835	0	160	100.36	120.325	0.864	28.251	5440	1.414	0.707	0.904	0.752445
706	CEP89_KAN613-2_4.tif:0011-2094	0.556	37.121	0	174	140.023	150.961	0.849	20.627	3972	1.501	0.666	0.888	0.549396
707	CEP89_KAN613-2_4.tif:0012-2174	0.441	15.847	0	71	64.312	156.683	0.845	6.995	1347	1.583	0.632	0.895	0.186313
										6078				0.840692
708	CEP89_KAN613-3_1.tif:0001-0174	0.831	33.712	0	172	106.844	12.597	0.902	28.012	5394	1.202	0.832	0.933	0.746083
709	CEP89_KAN613-3_1.tif:0002-0241	0.805	23.626	0	195	98.303	17.401	0.919	19.017	3662	1.185	0.844	0.928	0.506517
710	CEP89_KAN613-3_1.tif:0003-0338	0.727	13.164	0	83	140.871	24.352	0.907	9.571	1843	1.551	0.645	0.927	0.254919
711	CEP89_KAN613-3_1.tif:0004-0427	0.94	15.061	0	92	109.416	30.84	0.9	14.157	2726	1.19	0.84	0.91	0.377053
712	CEP89_KAN613-3_1.tif:0005-0469	0.608	10.197	0	95	98.164	33.854	0.912	6.195	1193	1.151	0.869	0.951	0.165012
713	CEP89_KAN613-3_1.tif:0006-0514	0.592	7.298	0	62	178.474	37.074	0.927	4.321	832	1.063	0.94	0.974	0.11508
714	CEP89_KAN613-3_1.tif:0007-0686	1.132	18.615	0	89	83.343	49.396	0.76	21.074	4058	1.376	0.727	0.872	0.561291
715	CEP89_KAN613-3_1.tif:0008-0725	0.727	32.779	0	189	86.178	52.244	0.927	23.831	4589	1.12	0.893	0.959	0.634737
716	CEP89_KAN613-3_1.tif:0009-0738	0.753	13.745	0	87	101.076	53.212	0.817	10.35	1993	1.689	0.592	0.903	0.275666
717	CEP89_KAN613-3_1.tif:0010-0820	0.883	7.635	0	43	84.334	59.063	0.926	6.741	1298	1.122	0.891	0.932	0.179536
718	CEP89_KAN613-3_1.tif:0011-0880	0.795	8.954	0	55	111.239	63.446	0.863	7.115	1370	1.458	0.686	0.922	0.189495
719	CEP89_KAN613-3_1.tif:0012-0920	0.748	25.451	0	122	131.955	66.314	0.841	19.033	3665	1.57	0.637	0.923	0.506932
720	CEP89_KAN613-3_1.tif:0013-0924	0.706	26.169	0	103	164.576	66.613	0.891	18.482	3559	1.026	0.974	0.916	0.492271
721	CEP89_KAN613-3_1.tif:0014-0954	0.525	25.733	0	115	52.177	68.792	0.9	13.497	2599	1.131	0.884	0.931	0.359486
722	CEP89_KAN613-3_1.tif:0015-1018	0.426	12.72	0	91	105.918	73.392	0.915	5.416	1043	1.262	0.792	0.916	0.144265
723	CEP89_KAN613-3_1.tif:0016-1084	0.644	8.605	0	38	158.264	78.141	0.844	5.541	1067	1.741	0.574	0.932	0.147584
724	CEP89_KAN613-3_1.tif:0017-1278	0.556	7.682	0	39	90.594	92.116	0.757	4.269	822	2.115	0.473	0.926	0.113697
725	CEP89_KAN613-3_1.tif:0018-1291	0.519	15.39	0	83	124.618	93.052	0.919	7.992	1539	1.204	0.831	0.926	0.21287
726	CEP89_KAN613-3_1.tif:0019-1395	0.457	18.489	0	125	172.189	100.535	0.899	8.449	1627	1.129	0.885	0.989	0.225042
727	CEP89_KAN613-3_1.tif:0020-1586	0.748	7.931	0	57	37.774	114.274	0.895	5.931	1142	1.316	0.76	0.944	0.157958
728	CEP89_KAN613-3_1.tif:0021-1653	0.696	14.179	0	231	112.009	119.202	0.845	9.867	1900	1.565	0.639	0.912	0.262803
729	CEP89_KAN613-3_1.tif:0022-1701	1.111	7.64	0	59	122.176	122.568	0.913	8.491	1635	1.235	0.809	0.934	0.226149
730	CEP89_KAN613-3_1.tif:0023-1732	0.535	10.427	0	55	58.634	124.8	0.93	5.577	1074	1.095	0.913	0.972	0.148553
731	CEP89_KAN613-3_1.tif:0024-1836	0.54	15.837	0	89	67.186	132.328	0.811	8.553	1647	1.122	0.891	0.881	0.227808
732	CEP89_KAN613-3_1.tif:0025-1979	0.623	3.55	0	20	165.179	142.624	0.898	2.212	426	1.452	0.689	0.934	0.0589231
733	CEP89_KAN613-3_1.tif:0026-2172	0.675	10.785	0	87	102.416	156.55	0.759	7.281	1402	1.607	0.622	0.864	0.193921
734	CEP89_KAN613-3_2.tif:0001-0228	0.519	75.2	0	329	86.912	16.483	0.932	39.052	7520	1.364	0.733	0.966	1.04015
735	CEP89_KAN613-3_2.tif:0002-0381	0.675	14.9	0	83	156.376	27.489	0.935	10.059	1937	1.337	0.748	0.939	0.26792
736	CEP89_KAN613-3_2.tif:0003-0712	0.426	21.28	0	84	34.366	51.343	0.884	9.062	1745	1.289	0.776	0.916	0.241363
737	CEP89_KAN613-3_2.tif:0004-1084	0.473	14.451	0	112	76.628	78.138	0.848	6.829	1315	1.718	0.582	0.938	0.181887
738	CEP89_KAN613-3_2.tif:0005-1111	0.774	67.906	0	347	123.931	80.072	0.965	52.544	10118	1.159	0.863	0.937	1.39949
739	CEP89_KAN613-3_2.tif:0006-1183	0.561	78.972	0	274	141.246	85.25	0.809	44.292	8529	1.832	0.546	0.889	1.17971
740	CEP89_KAN613-3_2.tif:0007-1205	0.66	15.795	0	112	97.313	86.899	0.924	10.417	2006	1.204	0.83	0.955	0.277464
741	CEP89_KAN613-3_2.tif:0008-1259	0.706	38.978	0	211	29.002	90.758	0.891	27.529	5301	1.514	0.661	0.941	0.733219
742	CEP89_KAN613-3_2.tif:0009-1301	0.525	24.743	0	105	173.016	93.798	0.941	12.978	2499	1.108	0.902	0.962	0.345655
743	CEP89_KAN613-3_2.tif:0010-1569	0.504	7.845	0	52	176.857	113.095	0.964	3.952	761	1.123	0.89	0.956	0.105259
744	CEP89_KAN613-3_2.tif:0011-1602	0.55	14.358	0	78	90.102	115.426	0.916	7.904	1522	1.24	0.807	0.951	0.210519
745	CEP89_KAN613-3_2.tif:0012-1663	0.8	22.766	0	140	134.898	119.884	0.947	18.207	3506	1.112	0.899	0.942	0.48494
746	CEP89_KAN613-3_2.tif:0013-1782	0.436	16.345	0	74	78.291	128.43	0.951	7.13	1373	1.161	0.861	0.971	0.189909
747	CEP89_KAN613-3_2.tif:0014-1811	0.639	27.13	0	148	143.52	130.483	0.936	17.33	3337	1.347	0.742	0.925	0.461564
748	CEP89_KAN613-3_3.tif:0001-0056	0.576	8.261	0	52	105.717	4.066	0.891	4.762	917	1.445	0.692	0.941	0.126837
749	CEP89_KAN613-3_3.tif:0002-0112	0.421	7.37	0	38	86.92	8.048	0.805	3.1	597	1.627	0.615	0.88	0.0825753
750	CEP89_KAN613-3_3.tif:0003-0220	0.493	262.674	0	1640	114.584	15.857	0.957	129.59	24954	1.023	0.978	0.974	3.45157
751	CEP89_KAN613-3_3.tif:0004-0363	0.872	24.94	0	148	120.177	26.118	0.872	21.759	4190	1.415	0.707	0.923	0.579549
752	CEP89_KAN613-3_3.tif:0005-0405	0.795	11.752	0	70	96.943	29.142	0.917	9.337	1798	1.11	0.901	0.942	0.248694
753	CEP89_KAN613-3_3.tif:0006-0402	0.421	4.605	0	31	141.53	28.982	0.844	1.937	373	1.705	0.587	0.926	0.0515923
754	CEP89_KAN613-3_3.tif:0007-0539	0.66	23.11	0	90	67.009	38.854	0.888	15.242	2935	1.457	0.686	0.924	0.405961
755	CEP89_KAN613-3_3.tif:0008-0626	0.8	15.481	0	112	181.951	45.124	0.868	12.38	2384	1.275	0.785	0.903	0.329748
756	CEP89_KAN613-3_3.tif:0009-0641	1.2	10.056	0	63	113.572	46.19	0.815	12.064	2323	1.448	0.691	0.894	0.321311
757	CEP89_KAN613-3_3.tif:0010-0687	0.447	7.86	0	30	18.92	49.542	0.927	3.511	676	1.269	0.788	0.94	0.0935024
758	CEP89_KAN613-3_3.tif:0011-0696	0.81	14.583	0	107	163.021	50.167	0.87	11.814	2275	1.581	0.632	0.912	0.314672
759	CEP89_KAN613-3_3.tif:0012-0765	0.846	12.969	0	115	74.063	55.12	0.781	10.978	2114	1.679	0.596	0.896	0.292402
760	CEP89_KAN613-3_3.tif:0013-0812	0.55	17.104	0	69	55.367	58.528	0.888	9.415	1813	1.287	0.777	0.942	0.250769
761	CEP89_KAN613-3_3.tif:0014-0827	0.784	17.808	0	196	171.362	59.598	0.905	13.964	2689	1.271	0.787	0.947	0.371935
762	CEP89_KAN613-3_3.tif:0015-0849	0.93	17.989	0	182	122.17	61.232	0.92	16.722	3220	1.425	0.702	0.94	0.445381
763	CEP89_KAN613-3_3.tif:0016-0866	0.68	22.55	0	165	94.357	62.435	0.942	15.341	2954	1.187	0.842	0.939	0.408589
764	CEP89_KAN613-3_3.tif:0017-0998	0.701	32.57	0	116	150.211	71.92	0.894	22.834	4397	1.105	0.905	0.941	0.608181
765	CEP89_KAN613-3_3.tif:0018-1219	0.665	32.891	0	229	80.544	87.86	0.947	21.863	4210	1.117	0.895	0.934	0.582315
766	CEP89_KAN613-3_3.tif:0019-1234	0.525	25	0	141	132.56	88.963	0.959	13.113	2525	1.01	0.99	0.927	0.349251
767	CEP89_KAN613-3_3.tif:0020-1246	0.452	4.701	0	27	103.258	89.777	0.971	2.124	409	1.032	0.969	0.946	0.0565717
768	CEP89_KAN613-3_3.tif:0021-1273	0.727	47.021	0	244	164.945	91.739	0.789	34.186	6583	1.557	0.642	0.864	0.910542
769	CEP89_KAN613-3_3.tif:0022-1358	0.421	24.63	0	127	40.858	97.895	0.985	10.36	1995	1.181	0.846	0.959	0.275943
770	CEP89_KAN613-3_3.tif:0023-1607	0.457	18.477	0	83	127.637	115.815	0.917	8.444	1626	1.299	0.77	0.951	0.224904
771	CEP89_KAN613-3_3.tif:0024-1795	0.685	29.636	0	128	76.46	129.414	0.851	20.316	3912	1.539	0.65	0.946	0.541097
772	CEP89_KAN613-3_3.tif:0025-1844	0.696	15.993	0	63	98.368	132.908	0.888	11.129	2143	1.414	0.707	0.95	0.296414
773	CEP89_KAN613-3_3.tif:0026-1968	0.748	14.118	0	72	101.135	141.836	0.863	10.558	2033	1.283	0.779	0.9	0.281199
774	CEP89_KAN613-3_3.tif:0027-1971	0.53	17.775	0	73	120.424	142.073	0.921	9.415	1813	1.339	0.747	0.971	0.250769
775	CEP89_KAN613-3_4.tif:0001-0144	0.727	16.771	0	132	99.54	10.403	0.927	12.194	2348	1.154	0.867	0.962	0.324769
776	CEP89_KAN613-3_4.tif:0002-0249	0.483	15.731	0	62	73.016	17.917	0.924	7.598	1463	1.179	0.848	0.925	0.202358
777	CEP89_KAN613-3_4.tif:0003-0300	0.457	13.227	0	61	122.534	21.653	0.887	6.045	1164	1.361	0.735	0.946	0.161001
778	CEP89_KAN613-3_4.tif:0004-0597	0.732	28.397	0	126	65.949	43.07	0.934	20.793	4004	1.197	0.835	0.962	0.553822
779	CEP89_KAN613-3_4.tif:0005-0602	0.779	59.327	0	359	151.017	43.389	0.922	46.214	8899	1.39	0.72	0.94	1.23088
780	CEP89_KAN613-3_4.tif:0006-0650	0.618	12.689	0	62	152.304	46.86	0.81	7.842	1510	1.826	0.548	0.912	0.208859
781	CEP89_KAN613-3_4.tif:0007-0913	0.696	18.194	0	140	177.488	65.774	0.912	12.661	2438	1.303	0.768	0.954	0.337217
782	CEP89_KAN613-3_4.tif:0008-1084	0.53	17.735	0	92	53.687	78.168	0.881	9.394	1809	1.193	0.838	0.94	0.250216
783	CEP89_KAN613-3_4.tif:0009-1127	0.805	16.252	0	86	130.019	81.24	0.905	13.082	2519	1.25	0.8	0.939	0.348421
784	CEP89_KAN613-3_4.tif:0010-1324	0.769	19.926	0	122	180.884	95.441	0.887	15.315	2949	1.377	0.726	0.937	0.407897
785	CEP89_KAN613-3_4.tif:0011-1353	1.07	16.481	0	71	149.584	97.502	0.8	17.631	3395	1.594	0.627	0.902	0.469587
786	CEP89_KAN613-3_4.tif:0012-1445	0.576	18.541	0	102	98.915	104.193	0.907	10.687	2058	1.247	0.802	0.917	0.284657
787	CEP89_KAN613-3_4.tif:0013-1492	0.483	17.624	0	87	49.642	107.509	0.969	8.512	1639	1.029	0.972	0.969	0.226702
788	CEP89_KAN613-3_4.tif:0014-1517	0.608	17.128	0	60	66.952	109.325	0.805	10.407	2004	1.381	0.724	0.911	0.277188
789	CEP89_KAN613-3_4.tif:0015-1949	0.841	16.265	0	72	75.433	140.46	0.882	13.684	2635	1.494	0.67	0.934	0.364466
790	CEP89_KAN613-3_4.tif:0016-1982	0.675	5.962	0	40	130.943	142.839	0.962	4.025	775	1.162	0.861	0.945	0.107196
791	CEP89_KAN613-3_4.tif:0017-2155	0.431	43.566	0	154	82.122	155.295	0.865	18.778	3616	1.615	0.619	0.933	0.500155
										2841.15				0.39298
792	CEP89_KAN613-4_1.tif:0001-0350	0.628	32.843	0	89	89.162	25.217	0.96	20.638	3974	1.145	0.873	0.942	0.549672
793	CEP89_KAN613-4_1.tif:0002-0380	0.893	31.762	0	124	127.933	27.342	0.851	28.37	5463	1.161	0.861	0.93	0.755627
794	CEP89_KAN613-4_1.tif:0003-0402	0.68	9.252	0	48	159.06	29.005	0.858	6.294	1212	1.568	0.638	0.923	0.16764
795	CEP89_KAN613-4_1.tif:0004-0465	0.753	39.476	0	255	86.186	33.545	0.915	29.726	5724	1.286	0.778	0.924	0.791727
796	CEP89_KAN613-4_1.tif:0005-0471	0.685	10.591	0	50	48.803	33.905	0.833	7.26	1398	1.416	0.706	0.88	0.193367
797	CEP89_KAN613-4_1.tif:0006-0567	0.717	38.08	0	159	90.385	40.861	0.914	27.29	5255	1.482	0.675	0.965	0.726857
798	CEP89_KAN613-4_1.tif:0007-0694	0.691	29.301	0	183	168.886	49.993	0.957	20.238	3897	1.08	0.926	0.94	0.539022
799	CEP89_KAN613-4_1.tif:0008-0796	0.415	14.325	0	67	76.795	57.385	0.906	5.951	1146	1.197	0.836	0.947	0.158511
800	CEP89_KAN613-4_1.tif:0009-0812	0.784	32.583	0	174	45.777	58.547	0.882	25.55	4920	1.39	0.719	0.935	0.68052
801	CEP89_KAN613-4_1.tif:0010-0842	0.665	83.672	0	336	159.982	60.693	0.871	55.619	10710	1.189	0.841	0.924	1.48138
802	CEP89_KAN613-4_1.tif:0011-0971	0.904	10.822	0	111	111.225	69.973	0.853	9.779	1883	1.135	0.881	0.902	0.260451
803	CEP89_KAN613-4_1.tif:0012-1108	0.514	36.98	0	203	173.941	79.847	0.871	19.012	3661	1.342	0.745	0.872	0.506379
804	CEP89_KAN613-4_1.tif:0013-1352	0.758	28.233	0	153	112.383	97.417	0.907	21.406	4122	1.152	0.868	0.951	0.570143
805	CEP89_KAN613-4_1.tif:0014-1629	0.784	28.007	0	131	142.964	117.368	0.918	21.962	4229	1.365	0.733	0.924	0.584943
806	CEP89_KAN613-4_2.tif:0001-0140	0.467	9.2	0	31	45.077	10.079	0.866	4.3	828	1.535	0.652	0.923	0.114527
807	CEP89_KAN613-4_2.tif:0002-0180	0.8	48.786	0	230	90.44	13.03	0.899	39.016	7513	1.302	0.768	0.945	1.03918
808	CEP89_KAN613-4_2.tif:0003-0258	0.763	37.884	0	299	79.217	18.618	0.77	28.921	5569	1.384	0.722	0.867	0.770288
809	CEP89_KAN613-4_2.tif:0004-0498	0.872	21.262	0	108	137.779	35.905	0.832	18.55	3572	1.51	0.662	0.921	0.494069
810	CEP89_KAN613-4_2.tif:0005-0534	0.706	57.757	0	239	62.1	38.518	0.901	40.792	7855	1.104	0.906	0.951	1.08648
811	CEP89_KAN613-4_2.tif:0006-0634	0.556	25.692	0	138	32.576	45.727	0.881	14.276	2749	1.334	0.75	0.995	0.380234
812	CEP89_KAN613-4_2.tif:0007-0650	1.033	19.281	0	106	86.771	46.852	0.758	19.926	3837	1.565	0.639	0.888	0.530723
813	CEP89_KAN613-4_2.tif:0008-0667	0.826	31.491	0	249	103.677	48.101	0.845	26.002	5007	1.544	0.648	0.911	0.692554
814	CEP89_KAN613-4_2.tif:0009-0813	0.452	193.425	0	1050	150.58	58.584	0.951	87.39	16828	1.114	0.897	0.983	2.3276
815	CEP89_KAN613-4_2.tif:0010-0900	0.976	37.947	0	283	155.36	64.901	0.892	37.048	7134	1.093	0.915	0.919	0.986755
816	CEP89_KAN613-4_2.tif:0011-0921	0.93	37.207	0	208	136.815	66.409	0.942	34.586	6660	1.192	0.839	0.935	0.921192
817	CEP89_KAN613-4_2.tif:0012-0991	1.049	81.356	0	513	166.755	71.473	0.877	85.344	16434	1.311	0.763	0.942	2.2731
818	CEP89_KAN613-4_2.tif:0013-1172	0.857	23.788	0	140	139.541	84.415	0.865	20.383	3925	1.23	0.813	0.938	0.542895
819	CEP89_KAN613-4_2.tif:0014-1192	0.805	24.252	0	102	90.368	85.859	0.874	19.521	3759	1.321	0.757	0.914	0.519934
820	CEP89_KAN613-4_2.tif:0015-1237	0.769	18.149	0	87	175.08	89.23	0.864	13.949	2686	1.386	0.721	0.925	0.37152
821	CEP89_KAN613-4_2.tif:0016-1301	0.499	46.333	0	193	36.394	93.754	0.855	23.099	4448	1.654	0.604	0.932	0.615235
822	CEP89_KAN613-4_2.tif:0017-1349	0.883	23.659	0	128	122.084	97.185	0.764	20.887	4022	1.524	0.656	0.835	0.556312
823	CEP89_KAN613-4_2.tif:0018-1562	0.452	36.977	0	128	168.458	112.535	0.907	16.706	3217	1.233	0.811	0.946	0.444966
824	CEP89_KAN613-4_2.tif:0019-1614	0.447	131.512	0	472	142.902	116.347	0.974	58.734	11310	1.11	0.901	0.977	1.56437
825	CEP89_KAN613-4_2.tif:0020-1629	0.55	41.462	0	193	134.139	117.368	0.904	22.824	4395	1.318	0.759	0.918	0.607904
826	CEP89_KAN613-4_2.tif:0021-1815	0.675	24.915	0	118	141.409	130.763	0.899	16.821	3239	1.23	0.813	0.909	0.448009
827	CEP89_KAN613-4_2.tif:0022-2070	0.535	27.874	0	215	161.506	149.219	0.947	14.91	2871	1.089	0.918	0.941	0.397109
828	CEP89_KAN613-4_3.tif:0001-0215	0.867	25.132	0	102	50.927	15.52	0.838	21.796	4197	1.325	0.754	0.895	0.580517
829	CEP89_KAN613-4_3.tif:0002-0247	0.711	25.204	0	130	111.527	17.747	0.754	17.932	3453	1.68	0.595	0.864	0.477609
830	CEP89_KAN613-4_3.tif:0003-0259	0.644	19.306	0	92	125.605	18.655	0.902	12.432	2394	1.428	0.7	0.947	0.331131
831	CEP89_KAN613-4_3.tif:0004-0359	0.519	21.92	0	108	172.521	25.864	0.919	11.383	2192	1.446	0.692	0.948	0.303191
832	CEP89_KAN613-4_3.tif:0005-0438	0.592	13.061	0	68	108.93	31.542	0.932	7.733	1489	1.027	0.974	0.919	0.205954
833	CEP89_KAN613-4_3.tif:0006-0482	0.576	22.937	0	104	41.09	34.799	0.902	13.222	2546	1.159	0.863	0.969	0.352156
834	CEP89_KAN613-4_3.tif:0007-0568	0.488	162.372	0	672	152.42	40.938	0.979	79.263	15263	1.046	0.956	0.974	2.11113
835	CEP89_KAN613-4_3.tif:0008-0647	0.909	22.086	0	149	138.615	46.676	0.82	20.072	3865	1.092	0.916	0.891	0.534596
836	CEP89_KAN613-4_3.tif:0009-0669	0.898	63.636	0	391	70.268	48.242	0.848	57.171	11009	1.311	0.762	0.915	1.52273
837	CEP89_KAN613-4_3.tif:0010-0867	1.111	58.561	0	482	162.056	62.527	0.776	65.081	12532	1.275	0.784	0.872	1.73339
838	CEP89_KAN613-4_3.tif:0011-1025	1.002	51.741	0	319	173.143	73.853	0.838	51.859	9986	1.46	0.685	0.923	1.38124
839	CEP89_KAN613-4_3.tif:0012-1253	0.992	16.817	0	125	164.126	90.29	0.84	16.68	3212	1.329	0.752	0.903	0.444275
840	CEP89_KAN613-4_3.tif:0013-1301	0.878	35.012	0	190	93.323	93.751	0.92	30.728	5917	1.191	0.84	0.931	0.818423
841	CEP89_KAN613-4_3.tif:0014-1387	1.039	54.58	0	354	127.472	99.947	0.861	56.688	10916	1.193	0.839	0.907	1.50987
842	CEP89_KAN613-4_3.tif:0015-1475	0.691	36.301	0	163	76.621	106.285	0.957	25.073	4828	1.102	0.907	0.94	0.667795
843	CEP89_KAN613-4_3.tif:0016-1532	0.53	18.657	0	104	47.12	110.386	0.938	9.883	1903	1.201	0.833	0.94	0.263218
844	CEP89_KAN613-4_3.tif:0017-1544	0.566	9.028	0	54	173.91	111.337	0.84	5.11	984	1.432	0.698	0.893	0.136104
845	CEP89_KAN613-4_3.tif:0018-1850	0.649	21.008	0	195	145.946	133.322	0.899	13.637	2626	1.36	0.735	0.926	0.363221
846	CEP89_KAN613-4_3.tif:0019-1916	0.758	10.616	0	82	105.236	138.085	0.931	8.049	1550	1.031	0.97	0.951	0.214392
847	CEP89_KAN613-4_4.tif:0001-0134	0.478	22.054	0	98	124.479	9.632	0.885	10.537	2029	1.284	0.779	0.934	0.280646
848	CEP89_KAN613-4_4.tif:0002-0418	0.68	21.015	0	104	73.264	30.201	0.858	14.297	2753	1.137	0.879	0.897	0.380787
849	CEP89_KAN613-4_4.tif:0003-0434	0.634	10.369	0	41	35.041	31.26	0.671	6.569	1265	1.622	0.616	0.78	0.174971
850	CEP89_KAN613-4_4.tif:0004-0559	0.587	19.823	0	79	99.861	40.313	0.935	11.633	2240	1.185	0.844	0.938	0.30983
851	CEP89_KAN613-4_4.tif:0005-0605	0.519	23.98	0	101	93.75	43.635	0.994	12.453	2398	1.127	0.887	0.962	0.331685
852	CEP89_KAN613-4_4.tif:0006-0884	0.602	22.724	0	119	135.697	63.735	0.879	13.689	2636	1.373	0.728	0.943	0.364604
853	CEP89_KAN613-4_4.tif:0007-0987	0.597	18.722	0	173	176.162	71.166	0.861	11.181	2153	1.766	0.566	0.935	0.297797
854	CEP89_KAN613-4_4.tif:0008-1047	0.696	34.701	0	155	80.378	75.407	0.845	24.148	4650	1.262	0.792	0.887	0.643175
855	CEP89_KAN613-4_4.tif:0009-1173	0.992	46.927	0	310	110.108	84.53	0.794	46.546	8963	1.491	0.671	0.912	1.23974
856	CEP89_KAN613-4_4.tif:0010-1216	0.462	28.955	0	199	150.656	87.671	0.993	13.383	2577	1.218	0.821	0.962	0.356443
857	CEP89_KAN613-4_4.tif:0011-1236	0.898	10.491	0	51	40.689	89.054	0.829	9.426	1815	1.719	0.582	0.928	0.251046
858	CEP89_KAN613-4_4.tif:0012-1306	0.826	23.151	0	152	128.851	94.109	0.798	19.116	3681	1.24	0.807	0.864	0.509145
859	CEP89_KAN613-4_4.tif:0013-1333	0.67	32.674	0	133	103.694	96.039	0.878	21.889	4215	1.118	0.895	0.931	0.583007
860	CEP89_KAN613-4_4.tif:0014-1534	0.815	45.904	0	271	105.443	110.525	0.864	37.427	7207	1.247	0.802	0.918	0.996852
861	CEP89_KAN613-4_4.tif:0015-1640	0.426	34.378	0	111	76.515	118.236	0.884	14.639	2819	1.505	0.664	0.943	0.389916
862	CEP89_KAN613-4_4.tif:0016-1669	0.784	29.868	0	193	42.79	120.331	0.791	23.421	4510	1.588	0.63	0.91	0.62381
863	CEP89_KAN613-4_4.tif:0017-1843	0.919	26.316	0	184	148.664	132.82	0.876	24.19	4658	1.132	0.883	0.932	0.644281
864	CEP89_KAN613-4_4.tif:0018-1869	1.007	49.113	0	404	59.523	134.651	0.861	49.48	9528	1.146	0.873	0.917	1.31789
										4882.34				0.675312
865	CEP89_KAN613-5_1.tif:0001-0249	0.956	50.641	0	345	111.205	17.884	0.758	48.39	9318	1.607	0.622	0.889	1.28884
866	CEP89_KAN613-5_1.tif:0002-0278	0.654	94.135	0	292	150.465	20.074	0.783	61.596	11861	1.492	0.67	0.887	1.64058
867	CEP89_KAN613-5_1.tif:0003-0358	0.774	15.57	0	108	147.628	25.807	0.82	12.048	2320	1.388	0.721	0.906	0.320896
868	CEP89_KAN613-5_1.tif:0004-0429	0.504	7.423	0	40	127.986	30.968	0.933	3.739	720	1.148	0.871	0.942	0.0995884
869	CEP89_KAN613-5_1.tif:0005-0459	1.106	53.502	0	343	124.133	33.104	0.757	59.181	11396	1.57	0.637	0.868	1.57626
870	CEP89_KAN613-5_1.tif:0006-0532	0.582	21.17	0	108	87.91	38.341	0.815	12.313	2371	1.7	0.588	0.926	0.32795
871	CEP89_KAN613-5_1.tif:0007-0566	0.462	12.618	0	64	31.249	40.762	0.927	5.832	1123	1.13	0.885	0.957	0.15533
872	CEP89_KAN613-5_1.tif:0008-0620	0.93	41.704	0	207	73.652	44.674	0.942	38.767	7465	1.214	0.824	0.935	1.03254
873	CEP89_KAN613-5_1.tif:0009-0789	0.618	59.975	0	276	83.975	56.902	0.788	37.063	7137	1.264	0.791	0.878	0.98717
874	CEP89_KAN613-5_1.tif:0010-0893	1.303	59.928	0	486	136.916	64.375	0.771	78.115	15042	1.756	0.57	0.884	2.08057
875	CEP89_KAN613-5_1.tif:0011-0993	0.836	15.584	0	97	105.209	71.574	0.816	13.03	2509	1.622	0.617	0.925	0.347038
876	CEP89_KAN613-5_1.tif:0012-1085	0.898	64.214	0	320	91.985	78.156	0.81	57.691	11109	1.235	0.81	0.896	1.53657
877	CEP89_KAN613-5_1.tif:0013-1192	0.504	22.557	0	109	65.833	85.886	0.933	11.363	2188	1.084	0.922	0.946	0.302638
878	CEP89_KAN613-5_1.tif:0014-1418	0.665	35.008	0	230	38.305	102.205	0.787	23.27	4481	1.79	0.559	0.895	0.619799
879	CEP89_KAN613-5_1.tif:0015-1429	0.8	65.188	0	329	143.132	103.019	0.777	52.134	10039	1.639	0.61	0.936	1.38857
880	CEP89_KAN613-5_1.tif:0016-1504	0.441	19.624	0	164	51.388	108.403	0.916	8.662	1668	1.545	0.647	0.95	0.230713
881	CEP89_KAN613-5_1.tif:0017-1736	0.608	61.41	0	277	146.91	125.136	0.876	37.313	7185	1.412	0.708	0.914	0.993809
882	CEP89_KAN613-5_1.tif:0018-1876	0.592	17.439	0	136	106.406	135.184	0.916	10.324	1988	1.416	0.706	0.958	0.274975
883	CEP89_KAN613-5_1.tif:0019-2078	0.54	24.298	0	113	116.956	149.762	0.927	13.123	2527	1.201	0.833	0.941	0.349527
884	CEP89_KAN613-5_2.tif:0001-0227	0.582	14.241	0	92	119.771	16.396	0.927	8.283	1595	1.257	0.795	0.941	0.220616
885	CEP89_KAN613-5_2.tif:0002-0233	0.467	79.5	0	243	97.851	16.824	0.838	37.157	7155	1.729	0.578	0.938	0.989659
886	CEP89_KAN613-5_2.tif:0003-0428	0.696	72.09	0	329	140.7	30.873	0.912	50.166	9660	1.342	0.745	0.95	1.33614
887	CEP89_KAN613-5_2.tif:0004-0455	0.441	46.729	0	178	77.928	32.757	0.802	20.627	3972	1.287	0.777	0.919	0.549396
888	CEP89_KAN613-5_2.tif:0005-0630	0.675	80.831	0	387	54.847	45.386	0.875	54.57	10508	1.547	0.646	0.922	1.45344
889	CEP89_KAN613-5_2.tif:0006-0638	0.54	5.808	0	30	64.082	45.978	0.944	3.137	604	1.318	0.759	0.916	0.0835436
890	CEP89_KAN613-5_2.tif:0007-0800	0.665	9.109	0	58	88.657	57.69	0.931	6.055	1166	1.224	0.817	0.959	0.161278
891	CEP89_KAN613-5_2.tif:0008-0838	0.956	39.554	0	269	146.585	60.417	0.817	37.796	7278	1.247	0.802	0.911	1.00667
892	CEP89_KAN613-5_2.tif:0009-0965	0.732	7.156	0	47	44.003	69.526	0.815	5.24	1009	1.286	0.778	0.89	0.139562
893	CEP89_KAN613-5_2.tif:0010-0989	0.743	104.378	0	406	139.479	71.273	0.922	77.513	14926	1.103	0.907	0.96	2.06452
894	CEP89_KAN613-5_2.tif:0011-1018	0.493	9.211	0	47	171.921	73.352	0.944	4.544	875	1.21	0.826	0.941	0.121028
895	CEP89_KAN613-5_2.tif:0012-1046	0.415	9.588	0	45	51.093	75.407	0.973	3.983	767	1.09	0.918	0.952	0.106089
896	CEP89_KAN613-5_2.tif:0013-1051	0.893	85.221	0	393	165.049	75.755	0.737	76.121	14658	1.962	0.51	0.912	2.02745
897	CEP89_KAN613-5_2.tif:0014-1126	0.509	24.673	0	111	126.136	81.138	0.943	12.557	2418	1.253	0.798	0.956	0.334451
898	CEP89_KAN613-5_2.tif:0015-1242	0.857	14.048	0	69	126.055	89.5	0.877	12.038	2318	1.381	0.724	0.919	0.320619
899	CEP89_KAN613-5_2.tif:0016-1315	0.55	9.689	0	46	113.885	94.743	0.962	5.333	1027	1.315	0.76	0.934	0.142052
900	CEP89_KAN613-5_2.tif:0017-1353	0.81	53.308	0	224	121.484	97.517	0.87	43.186	8316	1.265	0.791	0.894	1.15025
901	CEP89_KAN613-5_2.tif:0018-1424	0.992	43.963	0	311	160.435	102.588	0.812	43.607	8397	1.365	0.733	0.912	1.16145
902	CEP89_KAN613-5_2.tif:0019-1521	0.535	7.922	0	44	191.705	109.595	0.906	4.238	816	1.564	0.639	0.928	0.112867
903	CEP89_KAN613-5_2.tif:0020-1658	0.852	58.335	0	279	170.527	119.519	0.812	49.683	9567	1.299	0.77	0.891	1.32328
904	CEP89_KAN613-5_2.tif:0021-1693	0.665	13.234	0	89	145.095	122.05	0.871	8.797	1694	1.292	0.774	0.928	0.234309
905	CEP89_KAN613-5_2.tif:0022-1709	0.711	7.321	0	39	53.045	123.18	0.874	5.209	1003	1.439	0.695	0.938	0.138732
906	CEP89_KAN613-5_2.tif:0023-1711	0.8	69.513	0	285	122.708	123.377	0.899	55.593	10705	1.205	0.83	0.933	1.48069
907	CEP89_KAN613-5_2.tif:0024-1758	0.654	7.492	0	41	107.831	126.693	0.892	4.902	944	1.368	0.731	0.962	0.130571
908	CEP89_KAN613-5_2.tif:0025-2038	0.717	6.957	0	43	137.132	146.883	0.827	4.985	960	1.641	0.609	0.914	0.132784
909	CEP89_KAN613-5_3.tif:0001-0557	0.924	59.393	0	300	103.581	40.188	0.808	54.902	10572	1.149	0.871	0.883	1.46229
910	CEP89_KAN613-5_3.tif:0002-0656	0.462	16.539	0	172	56.362	47.326	0.897	7.644	1472	1.289	0.776	0.957	0.203603
911	CEP89_KAN613-5_3.tif:0003-0824	0.743	31.385	0	132	167.749	59.314	0.835	23.307	4488	1.285	0.778	0.914	0.620767
912	CEP89_KAN613-5_3.tif:0004-0897	0.473	53.44	0	144	40.438	64.656	0.948	25.254	4863	1.034	0.967	0.963	0.672636
913	CEP89_KAN613-5_3.tif:0005-0936	0.628	17.835	0	94	56.81	67.464	0.906	11.207	2158	1.12	0.893	0.945	0.298488
914	CEP89_KAN613-5_3.tif:0006-1093	0.992	79.466	0	448	172.674	78.836	0.895	78.822	15178	1.251	0.799	0.96	2.09938
915	CEP89_KAN613-5_3.tif:0007-1132	0.602	28.302	0	174	4.637	81.616	0.74	17.049	3283	1.269	0.788	0.823	0.454095
916	CEP89_KAN613-5_3.tif:0008-1207	0.483	79.355	0	210	69.919	87.012	0.747	38.325	7380	1.741	0.574	0.857	1.02078
917	CEP89_KAN613-5_3.tif:0009-1345	1.252	67.602	0	446	102.747	96.88	0.84	84.607	16292	1.597	0.626	0.94	2.25346
918	CEP89_KAN613-5_3.tif:0010-1352	0.821	24.703	0	201	153.509	97.407	0.891	20.269	3903	1.355	0.738	0.932	0.539852
919	CEP89_KAN613-5_3.tif:0011-1581	0.447	148.128	0	802	121.175	113.932	0.974	66.155	12739	1.11	0.901	0.977	1.76202
920	CEP89_KAN613-5_3.tif:0012-1677	0.478	17.902	0	135	49.185	120.869	0.945	8.553	1647	1.345	0.743	0.939	0.227808
921	CEP89_KAN613-5_3.tif:0013-1707	0.431	16.795	0	56	105.998	123.053	0.94	7.239	1394	1.351	0.74	0.971	0.192814
922	CEP89_KAN613-5_3.tif:0014-1821	0.613	10.297	0	62	89.371	131.236	0.936	6.31	1215	1.285	0.778	0.933	0.168055
923	CEP89_KAN613-5_4.tif:0001-0034	0.571	37.427	0	141	119.975	2.433	0.922	21.38	4117	1.222	0.818	0.965	0.569452
924	CEP89_KAN613-5_4.tif:0002-0262	0.571	19.536	0	63	159.627	18.829	0.823	11.16	2149	1.462	0.684	0.894	0.297244
925	CEP89_KAN613-5_4.tif:0003-0458	1.101	58.231	0	284	108.88	32.976	0.848	64.109	12345	1.468	0.681	0.936	1.70753
926	CEP89_KAN613-5_4.tif:0004-0583	0.634	88.902	0	401	61.137	42.001	0.739	56.325	10846	1.532	0.653	0.844	1.50019
927	CEP89_KAN613-5_4.tif:0005-0678	0.888	64.24	0	264	135.176	48.927	0.819	57.047	10985	1.535	0.651	0.902	1.51941
928	CEP89_KAN613-5_4.tif:0006-0905	0.639	27.276	0	206	91.578	65.231	0.885	17.423	3355	1.493	0.67	0.928	0.464054
929	CEP89_KAN613-5_4.tif:0007-1009	0.499	40.01	0	147	62.335	72.753	0.894	19.947	3841	1.482	0.675	0.946	0.531276
930	CEP89_KAN613-5_4.tif:0008-1066	0.893	51.116	0	244	124.635	76.797	0.747	45.658	8792	1.075	0.931	0.862	1.21608
931	CEP89_KAN613-5_4.tif:0009-1223	0.618	21.723	0	98	175.521	88.119	0.944	13.424	2585	1.202	0.832	0.933	0.35755
932	CEP89_KAN613-5_4.tif:0010-1227	0.997	94.047	0	489	153.66	88.453	0.852	93.773	18057	1.483	0.675	0.934	2.49759
933	CEP89_KAN613-5_4.tif:0011-1262	0.857	97.418	0	500	164.243	90.963	0.836	83.475	16074	1.29	0.775	0.914	2.22331
934	CEP89_KAN613-5_4.tif:0012-1282	0.852	50.744	0	283	86.593	92.403	0.812	43.217	8322	1.688	0.592	0.916	1.15108
935	CEP89_KAN613-5_4.tif:0013-1449	0.722	56.554	0	286	133.715	104.396	0.921	40.823	7861	1.086	0.92	0.955	1.08731
936	CEP89_KAN613-5_4.tif:0014-1585	0.602	31.56	0	194	41.617	114.208	0.834	19.012	3661	1.433	0.698	0.882	0.506379
937	CEP89_KAN613-5_4.tif:0015-1626	0.992	79.545	0	499	110.393	117.175	0.829	78.899	15193	1.259	0.794	0.912	2.10145
938	CEP89_KAN613-5_4.tif:0016-1795	0.727	50.129	0	207	144.441	129.392	0.917	36.446	7018	1.149	0.871	0.936	0.97071
939	CEP89_KAN613-5_4.tif:0017-1960	0.701	24.985	0	111	99.693	141.25	0.809	17.516	3373	1.708	0.586	0.906	0.466544
940	CEP89_KAN613-5_5.tif:0001-0050	0.826	57.56	0	276	123.559	3.672	0.806	47.528	9152	1.6	0.625	0.911	1.26588
941	CEP89_KAN613-5_5.tif:0002-0251	0.795	114.699	0	526	92.563	18.097	0.85	91.135	17549	1.525	0.656	0.942	2.42733
942	CEP89_KAN613-5_5.tif:0003-0265	0.54	9.058	0	32	151.907	19.131	0.898	4.892	942	1.205	0.83	0.945	0.130295
943	CEP89_KAN613-5_5.tif:0004-0547	0.846	13.221	0	84	150.309	39.418	0.807	11.191	2155	1.672	0.598	0.926	0.298073
944	CEP89_KAN613-5_5.tif:0005-0616	1.07	53.529	0	288	64.733	44.367	0.804	57.265	11027	1.714	0.584	0.954	1.52522
945	CEP89_KAN613-5_5.tif:0006-0633	1.215	62.825	0	498	132.249	45.565	0.658	76.344	14701	2.088	0.479	0.82	2.0334
946	CEP89_KAN613-5_5.tif:0007-0731	0.488	103.309	0	319	162.906	52.677	0.848	50.431	9711	1.55	0.645	0.949	1.3432
947	CEP89_KAN613-5_5.tif:0008-0881	1.023	73.228	0	460	176.485	63.514	0.878	74.916	14426	1.325	0.754	0.889	1.99536
948	CEP89_KAN613-5_5.tif:0009-0907	0.447	10.058	0	61	100.892	65.362	0.896	4.492	865	1.271	0.787	0.94	0.119644
949	CEP89_KAN613-5_5.tif:0010-1045	0.478	121.5	0	577	150.657	75.356	0.927	58.049	11178	1.265	0.791	0.968	1.54611
950	CEP89_KAN613-5_5.tif:0011-1166	0.836	130.714	0	682	127.547	84.077	0.908	109.29	21045	1.198	0.834	0.925	2.91088
951	CEP89_KAN613-5_5.tif:0012-1231	0.53	12.039	0	65	52.486	88.696	0.921	6.377	1228	1.143	0.875	0.971	0.169853
952	CEP89_KAN613-5_5.tif:0013-1303	0.753	29.2	0	146	148.044	93.908	0.826	21.988	4234	1.575	0.635	0.915	0.585635
953	CEP89_KAN613-5_5.tif:0014-1463	0.883	21.688	0	141	106.761	105.437	0.882	19.147	3687	1.351	0.74	0.934	0.509975
954	CEP89_KAN613-5_5.tif:0015-1719	0.769	35.892	0	177	62.603	123.872	0.822	27.586	5312	1.445	0.692	0.908	0.734741
955	CEP89_KAN613-5_5.tif:0016-1726	0.67	28.922	0	198	172.04	124.393	0.878	19.376	3731	1.583	0.632	0.938	0.516061
956	CEP89_KAN613-5_5.tif:0017-1877	1.111	55.85	0	394	111.17	135.271	0.686	62.068	11952	1.907	0.524	0.834	1.65317
957	CEP89_KAN613-5_5.tif:0018-1911	0.452	190.54	0	864	152.531	137.717	0.919	86.087	16577	1.107	0.903	0.983	2.29288
958	CEP89_KAN613-5_5.tif:0019-2037	0.447	139.012	0	528	63.134	146.823	0.94	62.084	11955	1.16	0.862	0.983	1.65358
959	CEP89_KAN613-5_5.tif:0020-2052	0.872	48.518	0	226	124.311	147.884	0.805	42.329	8151	1.511	0.662	0.908	1.12742
										6731.8				0.931124
960	CEP89_KAN613-6_1.tif:0001-0189	0.602	13.802	0	54	100.724	13.654	0.879	8.314	1601	1.341	0.746	0.959	0.221446
961	CEP89_KAN613-6_1.tif:0002-0449	0.67	6.791	0	33	158.475	32.395	0.928	4.549	876	1.163	0.86	0.935	0.121166
962	CEP89_KAN613-6_1.tif:0003-0458	0.66	16.157	0	98	113.829	33.009	0.913	10.656	2052	1.127	0.887	0.92	0.283827
963	CEP89_KAN613-6_1.tif:0004-0596	0.67	4.922	0	33	178.94	42.986	0.954	3.298	635	1.326	0.754	0.938	0.0878314
964	CEP89_KAN613-6_1.tif:0005-0614	0.421	20.963	0	85	68.257	44.272	0.95	8.818	1698	1.151	0.869	0.959	0.234863
965	CEP89_KAN613-6_1.tif:0006-0728	0.436	15.369	0	66	96.155	52.5	0.906	6.704	1291	1.249	0.801	0.933	0.178567
966	CEP89_KAN613-6_1.tif:0007-0769	0.706	9.956	0	141	141.209	55.404	1	7.032	1354	1.088	0.919	0.954	0.187281
967	CEP89_KAN613-6_1.tif:0008-0898	0.436	14.857	0	55	17.782	64.731	0.735	6.481	1248	2.035	0.491	0.894	0.17262
968	CEP89_KAN613-6_1.tif:0009-0959	0.55	5.934	0	32	172.459	69.105	0.944	3.266	629	1.226	0.816	0.955	0.0870015
969	CEP89_KAN613-6_1.tif:0010-1135	0.634	255.648	0	1901	167.811	81.795	0.924	161.969	31189	1.185	0.844	0.972	4.31397
970	CEP89_KAN613-6_1.tif:0011-1220	0.821	11.753	0	66	126.132	87.926	0.86	9.644	1857	1.632	0.613	0.913	0.256855
971	CEP89_KAN613-6_1.tif:0012-1421	0.732	17.163	0	93	132.424	102.45	0.924	12.567	2420	1.195	0.837	0.937	0.334728
972	CEP89_KAN613-6_1.tif:0013-1491	0.711	12.234	0	91	171.207	107.477	0.922	8.704	1676	1.395	0.717	0.938	0.23182
973	CEP89_KAN613-6_1.tif:0014-1502	0.613	6.932	0	35	122.909	108.277	0.883	4.248	818	1.186	0.843	0.925	0.113143
974	CEP89_KAN613-6_1.tif:0015-1762	0.701	4.511	0	40	70.008	126.972	0.852	3.163	609	1.679	0.596	0.928	0.0842352
975	CEP89_KAN613-6_1.tif:0016-1820	0.462	4.438	0	24	164.611	131.154	0.793	2.051	395	1.628	0.614	0.86	0.0546353
976	CEP89_KAN613-6_1.tif:0017-1946	0.556	49.215	0	271	104.935	140.291	0.859	27.347	5266	1.116	0.896	0.911	0.728378
977	CEP89_KAN613-6_2.tif:0001-0153	0.556	5.86	0	32	62.387	11.084	0.953	3.256	627	1.059	0.944	0.955	0.0867249
978	CEP89_KAN613-6_2.tif:0002-0205	0.561	9.537	0	43	99.255	14.739	0.878	5.349	1030	1.275	0.784	0.952	0.142467
979	CEP89_KAN613-6_2.tif:0003-0303	0.696	8.052	0	49	106.444	21.856	0.912	5.603	1079	1.248	0.802	0.947	0.149244
980	CEP89_KAN613-6_2.tif:0004-0478	0.878	4.45	0	27	131.725	34.441	0.967	3.905	752	1.119	0.893	0.936	0.104015
981	CEP89_KAN613-6_2.tif:0005-0593	0.644	7.645	0	53	76.914	42.73	0.867	4.923	948	1.063	0.941	0.905	0.131125
982	CEP89_KAN613-6_2.tif:0006-0620	0.862	7.066	0	35	95.525	44.699	0.95	6.092	1173	1.098	0.911	0.93	0.162246
983	CEP89_KAN613-6_2.tif:0007-0773	0.909	39.829	0	287	131.932	55.766	0.878	36.196	6970	1.372	0.729	0.931	0.964071
984	CEP89_KAN613-6_2.tif:0008-0788	0.447	205.837	0	1033	43.959	56.822	0.974	91.929	17702	1.11	0.901	0.977	2.44849
985	CEP89_KAN613-6_2.tif:0009-0799	0.576	11.351	0	48	92.181	57.639	0.866	6.543	1260	1.605	0.623	0.953	0.17428
986	CEP89_KAN613-6_2.tif:0010-0834	0.415	5.175	0	20	10.424	60.131	0.862	2.15	414	1.614	0.619	0.925	0.0572633
987	CEP89_KAN613-6_2.tif:0011-0898	0.639	11.325	0	69	42.19	64.697	0.885	7.234	1393	1.379	0.725	0.914	0.192676
988	CEP89_KAN613-6_2.tif:0012-1042	0.904	8.506	0	59	156.212	75.064	0.971	7.686	1480	1.17	0.855	0.941	0.204709
989	CEP89_KAN613-6_2.tif:0013-1102	0.862	14.404	0	118	75.663	79.44	0.853	12.417	2391	1.319	0.758	0.895	0.330716
990	CEP89_KAN613-6_2.tif:0014-1219	0.68	6.718	0	35	188.278	87.843	0.916	4.57	880	1.191	0.839	0.936	0.121719
991	CEP89_KAN613-6_2.tif:0015-1226	0.81	13.897	0	71	115.46	88.385	0.849	11.259	2168	1.388	0.721	0.891	0.299872
992	CEP89_KAN613-6_2.tif:0016-1368	0.774	9.268	0	73	135.035	98.573	0.849	7.172	1381	1.345	0.743	0.917	0.191016
993	CEP89_KAN613-6_2.tif:0017-1396	0.509	3.49	0	19	67.924	100.587	0.913	1.776	342	1.329	0.752	0.956	0.0473045
994	CEP89_KAN613-6_2.tif:0018-1640	0.784	14.49	0	47	69.602	118.229	0.819	11.363	2188	1.601	0.625	0.929	0.302638
995	CEP89_KAN613-6_2.tif:0019-1716	0.66	19.583	0	115	106.087	123.669	0.924	12.915	2487	1.186	0.843	0.962	0.343995
996	CEP89_KAN613-6_2.tif:0020-1862	0.654	10.746	0	49	57.352	134.189	0.892	7.032	1354	1.111	0.9	0.947	0.187281
997	CEP89_KAN613-6_2.tif:0021-2080	0.467	26.222	0	96	155.25	149.89	0.895	12.256	2360	1.431	0.699	0.928	0.326429
998	CEP89_KAN613-6_3.tif:0001-0227	0.421	7.012	0	48	59.44	16.391	0.95	2.95	568	1.35	0.741	0.964	0.0785642
999	CEP89_KAN613-6_3.tif:0002-0246	0.54	14.183	0	60	138.308	17.754	0.846	7.66	1475	1.498	0.668	0.95	0.204018
1000	CEP89_KAN613-6_3.tif:0003-0253	0.628	7.992	0	51	130.354	18.204	0.88	5.022	967	1.112	0.899	0.931	0.133753
1001	CEP89_KAN613-6_3.tif:0004-0534	0.561	14.056	0	49	176.626	38.489	0.933	7.883	1518	1.198	0.835	0.956	0.209965
1002	CEP89_KAN613-6_3.tif:0005-0536	0.732	16.191	0	75	138.656	38.6	0.89	11.856	2283	1.273	0.786	0.907	0.315778
1003	CEP89_KAN613-6_3.tif:0006-0544	0.701	10.363	0	55	113.499	39.247	0.75	7.265	1399	2.173	0.46	0.915	0.193506
1004	CEP89_KAN613-6_3.tif:0007-0665	0.878	8.45	0	40	176.558	48	0.898	7.416	1428	1.259	0.794	0.929	0.197517
1005	CEP89_KAN613-6_3.tif:0008-0702	0.779	25.273	0	176	80.493	50.619	0.932	19.687	3791	1.166	0.858	0.962	0.52436
1006	CEP89_KAN613-6_3.tif:0009-0738	0.722	31.885	0	98	150.533	53.217	0.896	23.016	4432	1.372	0.729	0.962	0.613022
1007	CEP89_KAN613-6_3.tif:0010-0997	0.821	24.133	0	106	153.317	71.864	0.891	19.801	3813	1.012	0.989	0.927	0.527403
1008	CEP89_KAN613-6_3.tif:0011-1062	0.711	13.788	0	67	104.363	76.5	0.922	9.81	1889	1.167	0.857	0.929	0.261281
1009	CEP89_KAN613-6_3.tif:0012-1127	0.779	16.9	0	81	116.829	81.238	0.842	13.165	2535	1.408	0.71	0.955	0.350634
1010	CEP89_KAN613-6_3.tif:0013-1145	0.717	26.333	0	114	133.001	82.515	0.914	18.872	3634	1.486	0.673	0.965	0.502645
1011	CEP89_KAN613-6_3.tif:0014-1260	0.504	9.526	0	34	58.352	90.86	0.813	4.798	924	1.73	0.578	0.919	0.127805
1012	CEP89_KAN613-6_3.tif:0015-1308	0.789	28.164	0	108	109.85	94.291	0.959	22.232	4281	1.086	0.921	0.935	0.592136
1013	CEP89_KAN613-6_3.tif:0016-1399	0.576	15.91	0	100	181.373	100.821	0.93	9.171	1766	1.183	0.845	0.965	0.244268
1014	CEP89_KAN613-6_3.tif:0017-1543	0.55	11.472	0	46	42.178	111.192	0.862	6.315	1216	1.268	0.788	0.942	0.168194
1015	CEP89_KAN613-6_3.tif:0018-1606	0.493	12.179	0	55	144.531	115.774	0.821	6.008	1157	1.55	0.645	0.9	0.160033
1016	CEP89_KAN613-6_3.tif:0019-1771	0.519	6.65	0	38	85.839	127.645	0.903	3.453	665	1.37	0.73	0.966	0.0919809
1017	CEP89_KAN613-6_3.tif:0020-2113	0.675	9.646	0	55	145.748	152.249	0.962	6.512	1254	1.193	0.838	0.945	0.17345
1018	CEP89_KAN613-6_4.tif:0001-0167	0.53	4.275	0	17	166.732	12.091	0.87	2.264	436	1.492	0.67	0.907	0.0603063
1019	CEP89_KAN613-6_4.tif:0002-0188	0.976	8.979	0	44	141.207	13.606	0.809	8.766	1688	1.457	0.686	0.889	0.233479
1020	CEP89_KAN613-6_4.tif:0003-0302	0.924	4.848	0	27	118.604	21.748	0.766	4.482	863	1.717	0.582	0.862	0.119368
1021	CEP89_KAN613-6_4.tif:0004-0461	0.504	5.969	0	49	59.228	33.277	0.756	3.007	579	1.628	0.614	0.894	0.0800856
1022	CEP89_KAN613-6_4.tif:0005-0700	0.763	22.061	0	126	166	50.44	0.871	16.841	3243	1.272	0.786	0.907	0.448563
1023	CEP89_KAN613-6_4.tif:0006-0755	0.909	6.84	0	75	62.345	54.464	0.85	6.216	1197	1.155	0.866	0.893	0.165566
1024	CEP89_KAN613-6_4.tif:0007-0929	0.961	18.459	0	165	149.223	66.921	0.898	17.735	3415	1.321	0.757	0.93	0.472353
1025	CEP89_KAN613-6_4.tif:0008-1110	0.623	6.425	0	43	63.779	80.026	0.936	4.004	771	1.109	0.902	0.96	0.106643
1026	CEP89_KAN613-6_4.tif:0009-1159	0.67	10.612	0	57	84.084	83.543	0.913	7.109	1369	1.119	0.893	0.959	0.189356
1027	CEP89_KAN613-6_4.tif:0010-1161	0.478	13.033	0	67	141.31	83.71	0.945	6.227	1199	1.198	0.834	0.934	0.165842
1028	CEP89_KAN613-6_4.tif:0011-1176	0.992	21.414	0	99	119.762	84.774	0.907	21.24	4090	1.251	0.8	0.923	0.565717
1029	CEP89_KAN613-6_4.tif:0012-1261	0.956	12.022	0	71	123.623	90.866	0.775	11.487	2212	1.834	0.545	0.92	0.305958
1030	CEP89_KAN613-6_4.tif:0013-1510	0.55	8.792	0	40	44.54	108.79	0.888	4.84	932	1.219	0.82	0.946	0.128912
1031	CEP89_KAN613-6_4.tif:0014-1512	0.576	6.82	0	29	189.419	108.996	0.959	3.931	757	1.118	0.895	0.965	0.104706
1032	CEP89_KAN613-6_4.tif:0015-1664	0.67	5.109	0	27	163.597	119.912	0.878	3.422	659	1.218	0.821	0.928	0.091151
1033	CEP89_KAN613-6_4.tif:0016-1857	0.66	11.118	0	56	112.017	133.855	0.951	7.333	1412	1.291	0.775	0.962	0.195304
1034	CEP89_KAN613-6_4.tif:0017-1875	0.753	13.828	0	57	87.721	135.176	0.826	10.412	2005	1.667	0.6	0.924	0.277326
1035	CEP89_KAN613-6_4.tif:0018-2076	0.441	7.165	0	37	55.655	149.642	0.873	3.163	609	1.458	0.686	0.904	0.0842352
1036	CEP89_KAN613-6_4.tif:0019-2114	0.727	8.279	0	40	141.377	152.367	0.848	6.019	1159	1.385	0.722	0.93	0.16031
1037	CEP89_KAN613-6_4.tif:0020-2121	0.685	13.364	0	60	81.367	152.881	0.949	9.161	1764	1.136	0.881	0.936	0.243991
										2273.68				0.314489
1038	CEP89_KAN613-7_1.tif:0001-0582	1.22	53.672	0	367	120.826	41.942	0.759	65.501	12613	1.645	0.608	0.913	1.74459
1039	CEP89_KAN613-7_1.tif:0002-0725	1.122	52.926	0	311	142.745	52.298	0.774	59.368	11432	1.308	0.764	0.88	1.58124
1040	CEP89_KAN613-7_1.tif:0003-0726	0.805	64.768	0	354	187.613	52.326	0.801	52.134	10039	1.32	0.758	0.928	1.38857
1041	CEP89_KAN613-7_1.tif:0004-0752	0.795	22.281	0	171	80.551	54.22	0.965	17.703	3409	1.173	0.852	0.947	0.471523
1042	CEP89_KAN613-7_1.tif:0005-0762	0.94	87.221	0	530	169.259	54.98	0.887	81.984	15787	1.393	0.718	0.938	2.18361
1043	CEP89_KAN613-7_1.tif:0006-0923	0.421	17.951	0	129	40.965	66.531	0.95	7.551	1454	1.136	0.88	0.959	0.201113
1044	CEP89_KAN613-7_1.tif:0007-1060	1.127	41.696	0	267	118.683	76.357	0.653	46.988	9048	1.839	0.544	0.819	1.25149
1045	CEP89_KAN613-7_1.tif:0008-1130	0.758	59.062	0	309	182.52	81.476	0.706	44.781	8623	1.526	0.655	0.846	1.19271
1046	CEP89_KAN613-7_1.tif:0009-1294	1.423	40.763	0	303	124.952	93.244	0.686	58.002	11169	2.156	0.464	0.875	1.54486
1047	CEP89_KAN613-7_1.tif:0010-1355	0.654	47.444	0	252	136.368	97.611	0.881	31.045	5978	1.484	0.674	0.933	0.82686
1048	CEP89_KAN613-7_1.tif:0011-1457	0.691	39.12	0	156	101.125	105.052	0.905	27.02	5203	1.277	0.783	0.937	0.719664
1049	CEP89_KAN613-7_1.tif:0012-1699	0.904	8.977	0	50	111.496	122.428	0.782	8.112	1562	1.321	0.757	0.861	0.216051
1050	CEP89_KAN613-7_1.tif:0013-1698	0.514	4.808	0	30	109.795	122.401	0.855	2.472	476	1.481	0.675	0.925	0.065839
1051	CEP89_KAN613-7_1.tif:0014-1920	0.639	8.211	0	55	159.056	138.4	0.793	5.245	1010	1.702	0.587	0.914	0.1397
1052	CEP89_KAN613-7_1.tif:0015-1992	0.982	59.286	0	331	133.005	143.583	0.711	58.189	11205	1.814	0.551	0.846	1.54984
1053	CEP89_KAN613-7_1.tif:0016-2028	0.982	44.899	0	273	96.763	146.124	0.685	44.069	8486	1.79	0.559	0.825	1.17376
1054	CEP89_KAN613-7_1.tif:0017-2043	1.283	74.109	0	599	78.123	147.257	0.771	95.061	18305	1.759	0.568	0.881	2.5319
1055	CEP89_KAN613-7_1.tif:0018-2152	0.545	5.514	0	39	114.338	155.08	0.924	3.007	579	1.433	0.698	0.929	0.0800856
1056	CEP89_KAN613-7_1.tif:0019-2179	0.618	10.983	0	85	64.406	157.025	0.78	6.787	1307	1.25	0.8	0.856	0.180781
1057	CEP89_KAN613-7_2.tif:0001-0019	0.665	59.836	0	304	79.676	1.368	0.921	39.774	7659	1.111	0.9	0.918	1.05937
1058	CEP89_KAN613-7_2.tif:0002-0174	0.821	9.816	0	74	149.759	12.579	0.891	8.055	1551	1.186	0.843	0.913	0.21453
1059	CEP89_KAN613-7_2.tif:0003-0297	0.831	54.275	0	272	80.394	21.421	0.792	45.097	8684	1.866	0.536	0.907	1.20115
1060	CEP89_KAN613-7_2.tif:0004-0425	0.784	10.119	0	71	141.965	30.656	0.843	7.935	1528	1.714	0.583	0.907	0.211349
1061	CEP89_KAN613-7_2.tif:0005-0560	0.961	39.07	0	288	185.604	40.353	0.74	37.536	7228	1.577	0.634	0.845	0.999756
1062	CEP89_KAN613-7_2.tif:0006-0589	0.769	80.527	0	365	113.883	42.429	0.896	61.892	11918	1.203	0.831	0.949	1.64846
1063	CEP89_KAN613-7_2.tif:0007-0627	0.545	30.124	0	108	142.613	45.179	0.935	16.426	3163	1.215	0.823	0.946	0.437497
1064	CEP89_KAN613-7_2.tif:0008-0716	0.566	107.404	0	320	55.306	51.593	0.886	60.796	11707	1.201	0.832	0.965	1.61928
1065	CEP89_KAN613-7_2.tif:0009-0806	1.07	94.427	0	672	160.248	58.109	0.753	101.017	19452	1.807	0.553	0.875	2.69055
1066	CEP89_KAN613-7_2.tif:0010-0859	0.956	79.815	0	451	112.614	61.864	0.817	76.267	14686	1.507	0.663	0.918	2.03133
1067	CEP89_KAN613-7_2.tif:0011-0978	1.168	64.32	0	529	176.39	70.475	0.823	75.155	14472	1.236	0.809	0.926	2.00173
1068	CEP89_KAN613-7_2.tif:0012-1156	1.288	84.21	0	577	147.608	83.377	0.892	108.454	20884	1.217	0.821	0.915	2.88862
1069	CEP89_KAN613-7_2.tif:0013-1283	0.722	10.54	0	75	59.474	92.425	0.842	7.608	1465	1.643	0.609	0.952	0.202635
1070	CEP89_KAN613-7_2.tif:0014-1282	0.602	99.086	0	340	93.38	92.416	0.905	59.69	11494	1.323	0.756	0.947	1.58982
1071	CEP89_KAN613-7_2.tif:0015-1362	1.579	91.405	0	756	142.947	98.121	0.825	144.302	27787	1.532	0.653	0.924	3.84342
1072	CEP89_KAN613-7_2.tif:0016-1441	1.075	57.459	0	365	181.486	103.929	0.757	61.767	11894	1.732	0.577	0.896	1.64514
1073	CEP89_KAN613-7_2.tif:0017-1604	1.194	55.378	0	427	168.849	115.581	0.661	66.145	12737	2.53	0.395	0.906	1.76175
1074	CEP89_KAN613-7_2.tif:0018-1678	1.267	46.783	0	315	127.997	120.962	0.748	59.28	11415	1.895	0.528	0.892	1.57889
1075	CEP89_KAN613-7_2.tif:0019-1702	0.857	62.37	0	335	61.117	122.642	0.817	53.443	10291	1.457	0.687	0.907	1.42342
1076	CEP89_KAN613-7_2.tif:0020-1784	1.101	83.429	0	494	84.038	128.528	0.725	91.851	17687	1.611	0.621	0.88	2.44642
1077	CEP89_KAN613-7_2.tif:0021-1874	0.467	9.278	0	52	166.275	135.062	0.907	4.336	835	1.314	0.761	0.963	0.115495
1078	CEP89_KAN613-7_2.tif:0022-1942	1.075	63.164	0	465	55.667	139.928	0.663	67.9	13075	2.169	0.461	0.825	1.8085
1079	CEP89_KAN613-7_2.tif:0023-1980	0.566	5.633	0	36	39.684	142.77	0.722	3.189	614	1.794	0.557	0.858	0.0849267
1080	CEP89_KAN613-7_2.tif:0024-2148	0.701	58.578	0	276	159.072	154.812	0.653	41.067	7908	1.955	0.512	0.808	1.09381
1081	CEP89_KAN613-7_2.tif:0025-2173	0.566	25.128	0	185	156.735	156.635	0.83	14.224	2739	1.86	0.538	0.89	0.378851
1082	CEP89_KAN613-7_3.tif:0001-0143	0.623	7.983	0	51	93.511	10.336	0.914	4.975	958	1.305	0.766	0.92	0.132508
1083	CEP89_KAN613-7_3.tif:0002-0161	0.571	60.955	0	343	148.491	11.568	0.91	34.82	6705	1.349	0.741	0.944	0.927417
1084	CEP89_KAN613-7_3.tif:0003-0371	0.597	17.887	0	121	130.834	26.745	0.981	10.682	2057	1.169	0.856	0.947	0.284518
1085	CEP89_KAN613-7_3.tif:0004-0473	0.779	69.587	0	395	42.127	34.074	0.786	54.206	10438	1.248	0.801	0.912	1.44375
1086	CEP89_KAN613-7_3.tif:0005-0497	1.303	46.466	0	425	97.555	35.871	0.681	60.568	11663	1.95	0.513	0.854	1.61319
1087	CEP89_KAN613-7_3.tif:0006-0508	0.53	15.255	0	122	78.242	36.601	0.829	8.081	1556	1.355	0.738	0.923	0.215222
1088	CEP89_KAN613-7_3.tif:0007-0905	0.966	45.027	0	270	165.727	65.214	0.875	43.493	8375	1.169	0.855	0.905	1.15841
1089	CEP89_KAN613-7_3.tif:0008-0935	0.415	176.988	0	729	167.443	67.412	0.919	73.53	14159	1.031	0.97	0.994	1.95843
1090	CEP89_KAN613-7_3.tif:0009-0969	0.441	18.929	0	143	70.243	69.853	0.886	8.356	1609	1.613	0.62	0.944	0.222552
1091	CEP89_KAN613-7_3.tif:0010-0983	1.709	47.936	0	407	133.815	70.763	0.67	81.901	15771	1.696	0.59	0.824	2.1814
1092	CEP89_KAN613-7_3.tif:0011-1089	1.288	49.258	0	304	87.956	78.475	0.788	63.439	12216	1.424	0.702	0.886	1.68968
1093	CEP89_KAN613-7_3.tif:0012-1258	0.478	8.37	0	49	61.386	90.681	0.873	3.999	770	1.59	0.629	0.911	0.106504
1094	CEP89_KAN613-7_3.tif:0013-1398	0.618	20.731	0	71	150.279	100.757	0.928	12.811	2467	1.115	0.897	0.96	0.341228
1095	CEP89_KAN613-7_3.tif:0014-1570	0.769	10.054	0	77	99.01	113.185	0.855	7.727	1488	1.666	0.6	0.916	0.205816
1096	CEP89_KAN613-7_3.tif:0015-1638	0.525	9.248	0	64	172.156	118.037	0.9	4.85	934	1.336	0.748	0.931	0.129188
1097	CEP89_KAN613-7_3.tif:0016-1803	1.376	53.057	0	371	67.474	129.902	0.659	73.016	14060	2.175	0.46	0.839	1.94474
1098	CEP89_KAN613-7_3.tif:0017-1920	0.867	30.162	0	211	131.465	138.326	0.838	26.158	5037	1.635	0.612	0.918	0.696704
1099	CEP89_KAN613-7_3.tif:0018-2056	0.535	10.573	0	80	116.045	148.154	0.947	5.655	1089	1.25	0.8	0.945	0.150627
1100	CEP89_KAN613-7_4.tif:0001-0192	0.457	4.977	0	26	157.244	13.88	0.904	2.275	438	1.368	0.731	0.917	0.0605829
1101	CEP89_KAN613-7_4.tif:0002-0760	0.436	16.512	0	72	139.586	54.766	0.937	7.203	1387	1.238	0.808	0.933	0.191846
1102	CEP89_KAN613-7_4.tif:0003-0897	0.737	24.683	0	99	146.883	64.651	0.93	18.202	3505	1.368	0.731	0.956	0.484802
1103	CEP89_KAN613-7_4.tif:0004-0985	0.649	7.12	0	40	172.387	71.013	0.884	4.622	890	1.152	0.868	0.951	0.123102
1104	CEP89_KAN613-7_4.tif:0005-1028	0.8	13.903	0	117	190.3	74.116	0.89	11.119	2141	1.355	0.738	0.922	0.296137
1105	CEP89_KAN613-7_4.tif:0006-1152	0.499	65.865	0	240	164.741	83.061	0.894	32.836	6323	1.112	0.899	0.937	0.874579
1106	CEP89_KAN613-7_4.tif:0007-1405	1.205	53.591	0	318	119.832	101.234	0.698	64.566	12433	2.157	0.464	0.899	1.7197
1107	CEP89_KAN613-7_4.tif:0008-1464	0.545	46.629	0	218	35.899	105.499	0.854	25.426	4896	1.747	0.572	0.972	0.677201
1108	CEP89_KAN613-7_4.tif:0009-1487	0.883	23.229	0	204	162.337	107.219	0.861	20.508	3949	1.129	0.886	0.924	0.546214
1109	CEP89_KAN613-7_4.tif:0010-1532	0.685	8.288	0	71	136.771	110.407	0.961	5.681	1094	1.065	0.939	0.967	0.151319
1110	CEP89_KAN613-7_4.tif:0011-1553	0.561	9.037	0	47	187.551	111.901	0.743	5.069	976	1.421	0.704	0.861	0.134998
1111	CEP89_KAN613-7_4.tif:0012-1875	0.467	8.833	0	70	91.961	135.132	0.907	4.129	795	1.243	0.804	0.957	0.109962
1112	CEP89_KAN613-7_4.tif:0013-2054	0.644	11.798	0	101	55.495	148.049	0.892	7.598	1463	1.212	0.825	0.899	0.202358
1113	CEP89_KAN613-7_4.tif:0014-2170	0.467	10.978	0	59	128.333	156.391	1	5.131	988	1.06	0.943	0.963	0.136657
										7147.21				0.988582
1114	CEP89_KAN613-8_1.tif:0001-0081	0.597	70.322	0	335	134.621	5.858	0.912	41.997	8087	1.407	0.711	0.931	1.11857
1115	CEP89_KAN613-8_1.tif:0002-0260	0.706	105.963	0	363	128.373	18.747	0.901	74.838	14411	1.076	0.929	0.948	1.99329
1116	CEP89_KAN613-8_1.tif:0003-0288	0.815	44.949	0	229	43.816	20.75	0.735	36.648	7057	1.593	0.628	0.867	0.976104
1117	CEP89_KAN613-8_1.tif:0004-0512	0.628	81.81	0	451	60.241	36.924	0.944	51.407	9899	1.167	0.857	0.964	1.3692
1118	CEP89_KAN613-8_1.tif:0005-0604	1.272	101.6	0	760	122.253	43.539	0.759	129.268	24892	1.67	0.599	0.881	3.44299
1119	CEP89_KAN613-8_1.tif:0006-0656	0.582	20.384	0	86	85.169	47.306	0.899	11.856	2283	1.605	0.623	0.949	0.315778
1120	CEP89_KAN613-8_1.tif:0007-0903	0.982	121.381	0	615	149.085	65.154	0.711	119.136	22941	1.229	0.813	0.84	3.17313
1121	CEP89_KAN613-8_1.tif:0008-0929	1.059	45.461	0	420	93.988	66.904	0.823	48.161	9274	1.288	0.777	0.909	1.28275
1122	CEP89_KAN613-8_1.tif:0009-1067	1.21	89.631	0	820	140.685	76.944	0.905	108.454	20884	1.085	0.921	0.932	2.88862
1123	CEP89_KAN613-8_1.tif:0010-1114	0.509	101.939	0	281	42.112	80.25	0.943	51.88	9990	1.174	0.852	0.961	1.38179
1124	CEP89_KAN613-8_1.tif:0011-1180	0.821	72.082	0	353	89.748	85.066	0.869	59.145	11389	1.347	0.743	0.935	1.57529
1125	CEP89_KAN613-8_1.tif:0012-1344	0.431	129.325	0	356	177.923	96.893	0.974	55.743	10734	1.237	0.809	0.971	1.4847
1126	CEP89_KAN613-8_1.tif:0013-1439	0.956	68.478	0	326	87.099	103.692	0.736	65.434	12600	1.921	0.52	0.848	1.7428
1127	CEP89_KAN613-8_1.tif:0014-1738	0.743	70.28	0	297	131.024	125.275	0.835	52.191	10050	1.415	0.707	0.911	1.39009
1128	CEP89_KAN613-8_1.tif:0015-1920	0.779	26.307	0	203	135.798	138.35	0.797	20.492	3946	1.97	0.508	0.915	0.5458
1129	CEP89_KAN613-8_2.tif:0001-0197	0.685	90.977	0	343	102.105	14.217	0.898	62.365	12009	1.375	0.727	0.946	1.66105
1130	CEP89_KAN613-8_2.tif:0002-0268	0.613	16.246	0	154	97.04	19.362	0.859	9.955	1917	1.524	0.656	0.94	0.265154
1131	CEP89_KAN613-8_2.tif:0003-0564	0.519	11.75	0	46	119.138	40.65	0.891	6.102	1175	1.269	0.788	0.93	0.162523
1132	CEP89_KAN613-8_2.tif:0004-0590	0.997	106.615	0	523	128.841	42.547	0.879	106.304	20470	1.256	0.796	0.941	2.83135
1133	CEP89_KAN613-8_2.tif:0005-0844	0.872	55.244	0	289	162.966	60.837	0.832	48.198	9281	1.182	0.846	0.908	1.28372
1134	CEP89_KAN613-8_2.tif:0006-0868	0.841	56.327	0	280	132.665	62.566	0.829	47.387	9125	1.601	0.625	0.947	1.26214
1135	CEP89_KAN613-8_2.tif:0007-1013	0.706	91.147	0	418	79.821	73.006	0.877	64.374	12396	1.556	0.643	0.958	1.71458
1136	CEP89_KAN613-8_2.tif:0008-1085	0.836	59.578	0	295	143.986	78.199	0.864	49.813	9592	1.413	0.708	0.936	1.32674
1137	CEP89_KAN613-8_2.tif:0009-1347	0.914	42.25	0	288	129.592	97.093	0.926	38.616	7436	1.083	0.924	0.926	1.02853
1138	CEP89_KAN613-8_2.tif:0010-1399	0.857	68.121	0	415	102.258	100.842	0.865	58.371	11240	1.252	0.799	0.927	1.55468
1139	CEP89_KAN613-8_2.tif:0011-1625	0.535	28.272	0	225	47.432	117.142	0.906	15.122	2912	1.264	0.791	0.912	0.40278
1140	CEP89_KAN613-8_2.tif:0012-1650	0.867	94.204	0	573	123.284	118.943	0.855	81.699	15732	1.371	0.729	0.936	2.17601
1141	CEP89_KAN613-8_2.tif:0013-1713	0.639	51	0	169	167.276	123.499	0.976	32.577	6273	1.233	0.811	0.95	0.867664
1142	CEP89_KAN613-8_2.tif:0014-1855	0.982	86.18	0	558	61.511	133.729	0.828	84.586	16288	1.468	0.681	0.926	2.25291
1143	CEP89_KAN613-8_2.tif:0015-1862	0.566	26.229	0	111	57.1	134.226	0.942	14.847	2859	1.129	0.885	0.956	0.395449
1144	CEP89_KAN613-8_2.tif:0016-1936	0.499	43.979	0	200	155.448	139.538	0.749	21.925	4222	1.711	0.585	0.861	0.583975
1145	CEP89_KAN613-8_2.tif:0017-2153	0.737	64.106	0	318	91.323	155.203	0.86	47.273	9103	1.221	0.819	0.922	1.2591
1146	CEP89_KAN613-8_2.tif:0018-2192	0.836	25.261	0	137	108.926	157.936	0.835	21.121	4067	1.585	0.631	0.92	0.562536
1147	CEP89_KAN613-8_3.tif:0001-0313	0.426	14.683	0	78	33.394	22.551	0.948	6.253	1204	1.05	0.952	0.921	0.166534
1148	CEP89_KAN613-8_3.tif:0002-0360	0.441	12.247	0	50	124.658	25.947	0.886	5.406	1041	1.037	0.965	0.929	0.143988
1149	CEP89_KAN613-8_3.tif:0003-0502	0.904	58.563	0	268	169.895	36.166	0.873	52.918	10190	1.177	0.85	0.904	1.40945
1150	CEP89_KAN613-8_3.tif:0004-0617	1.039	40.97	0	255	83.998	44.459	0.791	42.553	8194	1.498	0.668	0.907	1.13337
1151	CEP89_KAN613-8_3.tif:0005-0623	0.483	25.269	0	118	161.292	44.853	0.866	12.204	2350	1.131	0.884	0.935	0.325045
1152	CEP89_KAN613-8_3.tif:0006-0724	1.044	60.806	0	360	132.993	52.163	0.892	63.471	12222	1.41	0.709	0.953	1.69051
1153	CEP89_KAN613-8_3.tif:0007-0825	0.841	49.957	0	312	40.417	59.54	0.821	42.028	8093	1.533	0.652	0.918	1.1194
1154	CEP89_KAN613-8_3.tif:0008-0886	1.059	87.946	0	529	155.659	63.882	0.783	93.17	17941	1.612	0.621	0.895	2.48155
1155	CEP89_KAN613-8_3.tif:0009-0884	0.654	37.19	0	103	111.887	63.735	0.943	24.335	4686	1.162	0.861	0.955	0.648154
1156	CEP89_KAN613-8_3.tif:0010-1150	0.732	44.574	0	263	73.406	82.92	0.924	32.639	6285	1.13	0.885	0.937	0.869323
1157	CEP89_KAN613-8_3.tif:0011-1158	1.091	101.095	0	613	122.831	83.479	0.924	110.251	21230	1.276	0.783	0.94	2.93647
1158	CEP89_KAN613-8_3.tif:0012-1257	0.872	129.613	0	687	158.002	90.642	0.736	113.081	21775	1.107	0.903	0.862	3.01186
1159	CEP89_KAN613-8_3.tif:0013-1399	0.878	49.414	0	368	168.109	100.867	0.829	43.368	8351	1.361	0.735	0.901	1.15509
1160	CEP89_KAN613-8_3.tif:0014-1435	1.111	55.818	0	470	172.843	103.413	0.849	62.032	11945	1.553	0.644	0.907	1.6522
1161	CEP89_KAN613-8_3.tif:0015-1458	0.54	68.856	0	317	23.831	105.107	0.871	37.188	7161	1.547	0.646	0.945	0.990489
1162	CEP89_KAN613-8_3.tif:0016-1558	0.665	70.359	0	384	89.842	112.237	0.871	46.769	9006	1.061	0.943	0.924	1.24568
1163	CEP89_KAN613-8_3.tif:0017-1671	0.94	57.088	0	361	168.018	120.448	0.875	53.661	10333	1.264	0.791	0.935	1.42923
1164	CEP89_KAN613-8_3.tif:0018-1750	0.493	156.674	0	742	141.032	126.108	0.957	77.295	14884	1.023	0.978	0.974	2.05871
1165	CEP89_KAN613-8_3.tif:0019-1780	0.769	80.899	0	355	107.678	128.291	0.864	62.178	11973	1.687	0.593	0.94	1.65607
1166	CEP89_KAN613-8_3.tif:0020-1918	0.852	61.628	0	294	57.099	138.216	0.902	52.487	10107	1.19	0.84	0.943	1.39797
1167	CEP89_KAN613-8_3.tif:0021-1998	0.514	45.374	0	176	171.156	143.962	0.91	23.328	4492	1.257	0.795	0.921	0.621321
1168	CEP89_KAN613-8_3.tif:0022-2144	0.691	49.609	0	244	73.3	154.503	0.858	34.264	6598	1.107	0.904	0.92	0.912617
1169	CEP89_KAN613-8_4.tif:0001-0223	1.163	54.071	0	400	125.522	16.12	0.76	62.899	12112	1.201	0.833	0.868	1.6753
1170	CEP89_KAN613-8_4.tif:0002-0301	0.628	55.81	0	208	91.86	21.73	0.917	35.069	6753	1.118	0.894	0.968	0.934056
1171	CEP89_KAN613-8_4.tif:0003-0311	0.545	6.152	0	35	131.633	22.459	0.935	3.355	646	1.239	0.807	0.946	0.0893529
1172	CEP89_KAN613-8_4.tif:0004-0439	0.976	67.218	0	368	116.562	31.621	0.765	65.626	12637	1.915	0.522	0.917	1.74791
1173	CEP89_KAN613-8_4.tif:0005-0494	0.66	22.37	0	88	141.801	35.587	0.874	14.754	2841	1.464	0.683	0.966	0.392959
1174	CEP89_KAN613-8_4.tif:0006-0557	0.665	74.188	0	217	147.329	40.146	0.974	49.314	9496	1.203	0.831	0.938	1.31346
1175	CEP89_KAN613-8_4.tif:0007-0596	0.545	38.343	0	178	109.133	42.949	0.935	20.908	4026	1.024	0.977	0.95	0.556865
1176	CEP89_KAN613-8_4.tif:0008-0614	0.665	48.422	0	224	44.447	44.255	0.931	32.187	6198	1.113	0.899	0.959	0.85729
1177	CEP89_KAN613-8_4.tif:0009-0667	0.519	118.51	0	354	95.826	48.07	0.848	61.544	11851	1.161	0.861	0.952	1.6392
1178	CEP89_KAN613-8_4.tif:0010-0850	0.499	73.865	0	240	53.445	61.304	0.954	36.825	7091	1.094	0.914	0.95	0.980807
1179	CEP89_KAN613-8_4.tif:0011-1152	0.826	84.025	0	500	66.485	83.055	0.919	69.38	13360	1.189	0.841	0.927	1.84792
1180	CEP89_KAN613-8_4.tif:0012-1161	0.919	55.921	0	351	131.659	83.76	0.811	51.402	9898	1.356	0.738	0.917	1.36906
1181	CEP89_KAN613-8_4.tif:0013-1367	0.685	89.75	0	339	162.836	98.511	0.949	61.523	11847	1.264	0.791	0.95	1.63864
1182	CEP89_KAN613-8_4.tif:0014-1531	1.137	67.493	0	408	124.08	110.343	0.763	76.76	14781	1.722	0.581	0.888	2.04447
1183	CEP89_KAN613-8_4.tif:0015-1726	0.519	29.83	0	156	109.653	124.408	0.827	15.491	2983	1.716	0.583	0.905	0.4126
1184	CEP89_KAN613-8_4.tif:0016-1745	0.982	75.534	0	445	146.775	125.774	0.813	74.137	14276	1.735	0.576	0.906	1.97462
1185	CEP89_KAN613-8_4.tif:0017-1851	0.706	79.022	0	399	90.072	133.425	0.926	55.811	10747	1.176	0.85	0.948	1.48649
1186	CEP89_KAN613-8_4.tif:0018-1955	0.644	16.734	0	115	122.398	140.912	0.955	10.776	2075	1.216	0.823	0.943	0.287008
1187	CEP89_KAN613-8_4.tif:0019-2164	0.478	34.652	0	94	103.511	155.985	0.959	16.556	3188	1.225	0.816	0.968	0.440955
										9478.39				1.31102
1188	CEP89_KAN613-9_1.tif:0001-0140	0.67	5.806	0	42	123.21	10.079	0.928	3.89	749	1.461	0.684	0.945	0.1036
1189	CEP89_KAN613-9_1.tif:0002-0195	0.706	10.735	0	59	52.757	14.098	0.891	7.582	1460	1.386	0.722	0.935	0.201943
1190	CEP89_KAN613-9_1.tif:0003-0280	0.732	4.83	0	29	80.254	20.235	0.924	3.537	681	1.203	0.831	0.934	0.094194
1191	CEP89_KAN613-9_1.tif:0004-0312	1.194	42.052	0	249	123.521	22.591	0.729	50.228	9672	1.972	0.507	0.904	1.3378
1192	CEP89_KAN613-9_1.tif:0005-0615	0.685	18.583	0	89	144.441	44.339	0.685	12.739	2453	2.463	0.406	0.871	0.339292
1193	CEP89_KAN613-9_1.tif:0006-0751	0.67	11.581	0	78	97.171	54.069	0.845	7.759	1494	1.189	0.841	0.896	0.206646
1194	CEP89_KAN613-9_1.tif:0007-0768	1.065	53.898	0	525	53.688	55.274	0.729	57.379	11049	1.946	0.514	0.872	1.52827
1195	CEP89_KAN613-9_1.tif:0008-0847	0.758	48.774	0	242	23.666	61.071	0.716	36.98	7121	2.091	0.478	0.861	0.984957
1196	CEP89_KAN613-9_1.tif:0009-0868	1.22	47.302	0	414	125.542	62.479	0.677	57.727	11116	1.83	0.546	0.851	1.53753
1197	CEP89_KAN613-9_1.tif:0010-1120	0.763	17.639	0	72	68.33	80.754	0.89	13.466	2593	1.421	0.704	0.955	0.358656
1198	CEP89_KAN613-9_1.tif:0011-1159	0.618	14.765	0	95	71.184	83.536	0.866	9.124	1757	1.624	0.616	0.956	0.243023
1199	CEP89_KAN613-9_1.tif:0012-1209	1.402	49.863	0	473	168.675	87.177	0.669	69.915	13463	1.525	0.656	0.829	1.86216
1200	CEP89_KAN613-9_1.tif:0013-1235	1.184	93.855	0	761	124.621	89.011	0.824	111.128	21399	1.583	0.632	0.946	2.95985
1201	CEP89_KAN613-9_1.tif:0014-1821	0.748	55.486	0	387	143.991	131.274	0.737	41.493	7990	1.61	0.621	0.865	1.10515
1202	CEP89_KAN613-9_1.tif:0015-1832	1.013	70.513	0	511	69.754	131.98	0.68	71.406	13750	1.455	0.687	0.826	1.90186
1203	CEP89_KAN613-9_1.tif:0016-1887	0.561	4.426	0	23	110.676	135.992	0.933	2.482	478	1.205	0.83	0.956	0.0661156
1204	CEP89_KAN613-9_1.tif:0017-1968	0.613	7.864	0	39	90.231	141.893	0.894	4.819	928	1.117	0.895	0.959	0.128358
1205	CEP89_KAN613-9_1.tif:0018-2035	0.462	8.124	0	37	102.059	146.692	0.897	3.755	723	1.302	0.768	0.947	0.100003
1206	CEP89_KAN613-9_2.tif:0001-0271	0.644	6.153	0	55	135.154	19.54	0.892	3.962	763	1.453	0.688	0.939	0.105536
1207	CEP89_KAN613-9_2.tif:0002-0495	0.696	5.157	0	30	163.545	35.666	0.964	3.588	691	1.14	0.877	0.95	0.0955772
1208	CEP89_KAN613-9_2.tif:0003-0558	1.111	64.042	0	467	121.846	40.144	0.773	71.172	13705	1.642	0.609	0.907	1.89564
1209	CEP89_KAN613-9_2.tif:0004-0674	0.421	18.926	0	112	72.777	48.563	0.971	7.961	1533	1.159	0.862	0.915	0.21204
1210	CEP89_KAN613-9_2.tif:0005-0695	0.576	6.252	0	33	189.303	50.04	0.808	3.604	694	1.54	0.65	0.895	0.0959921
1211	CEP89_KAN613-9_2.tif:0006-0751	0.54	9.058	0	71	161.07	54.124	0.779	4.892	942	1.806	0.554	0.881	0.130295
1212	CEP89_KAN613-9_2.tif:0007-0796	1.288	40.468	0	281	93.107	57.46	0.697	52.118	10036	1.975	0.506	0.844	1.38815
1213	CEP89_KAN613-9_2.tif:0008-0908	0.426	8.988	0	53	40.59	65.451	0.915	3.827	737	1.394	0.717	0.937	0.10194
1214	CEP89_KAN613-9_2.tif:0009-0996	0.525	24.901	0	116	119.897	71.78	0.9	13.061	2515	1.367	0.732	0.927	0.347868
1215	CEP89_KAN613-9_2.tif:0010-1023	0.566	8.569	0	38	101.663	73.732	0.93	4.85	934	1.294	0.773	0.928	0.129188
1216	CEP89_KAN613-9_2.tif:0011-1030	0.784	11.377	0	67	166.353	74.238	0.928	8.922	1718	1.073	0.932	0.926	0.237629
1217	CEP89_KAN613-9_2.tif:0012-1180	0.924	7.893	0	61	129.267	85.084	0.773	7.296	1405	1.21	0.826	0.866	0.194336
1218	CEP89_KAN613-9_2.tif:0013-1270	0.504	11.454	0	46	58.007	91.537	0.892	5.77	1111	1.533	0.652	0.928	0.15367
1219	CEP89_KAN613-9_2.tif:0014-1318	0.436	75.679	0	279	13.171	95.025	0.846	33.013	6357	1.468	0.681	0.928	0.879282
1220	CEP89_KAN613-9_2.tif:0015-1347	0.597	11.157	0	60	189	97.062	0.886	6.663	1283	1.504	0.665	0.939	0.177461
1221	CEP89_KAN613-9_2.tif:0016-1392	1.516	67.887	0	564	161.441	100.381	0.68	102.944	19823	1.804	0.554	0.865	2.74186
1222	CEP89_KAN613-9_2.tif:0017-1562	1.387	34.873	0	352	134.472	112.482	0.743	48.353	9311	1.569	0.637	0.905	1.28787
1223	CEP89_KAN613-9_2.tif:0018-1691	0.826	39.151	0	281	79.077	121.821	0.825	32.327	6225	1.118	0.894	0.888	0.861024
1224	CEP89_KAN613-9_2.tif:0019-1709	1.137	68.735	0	487	128.527	123.242	0.801	78.172	15053	1.718	0.582	0.918	2.08209
1225	CEP89_KAN613-9_2.tif:0020-1723	0.821	51.418	0	372	48.04	124.153	0.714	42.189	8124	1.656	0.604	0.866	1.12369
1226	CEP89_KAN613-9_2.tif:0021-1970	0.571	4.091	0	22	133.481	141.998	0.894	2.337	450	1.449	0.69	0.978	0.0622427
1227	CEP89_KAN613-9_2.tif:0022-2033	1.309	53.976	0	402	54.042	146.484	0.745	70.637	13602	1.72	0.581	0.887	1.88139
1228	CEP89_KAN613-9_3.tif:0001-0157	0.675	51.562	0	274	118.768	11.335	0.74	34.81	6703	1.324	0.755	0.861	0.92714
1229	CEP89_KAN613-9_3.tif:0002-0453	0.878	10.621	0	65	107.385	32.625	0.977	9.322	1795	1.015	0.985	0.958	0.248279
1230	CEP89_KAN613-9_3.tif:0003-0474	0.493	166.758	0	775	79.555	34.155	0.957	82.27	15842	1.023	0.978	0.974	2.19122
1231	CEP89_KAN613-9_3.tif:0004-0619	0.421	9.716	0	43	187.878	44.612	0.95	4.087	787	1.12	0.893	0.959	0.108856
1232	CEP89_KAN613-9_3.tif:0005-0666	0.774	17.913	0	78	181.616	47.986	0.861	13.861	2669	1.399	0.715	0.895	0.369169
1233	CEP89_KAN613-9_3.tif:0006-0706	1.168	63.391	0	428	77.71	50.848	0.715	74.07	14263	1.609	0.622	0.846	1.97282
1234	CEP89_KAN613-9_3.tif:0007-0856	1.314	44.043	0	251	164.621	61.765	0.804	57.867	11143	1.283	0.78	0.918	1.54127
1235	CEP89_KAN613-9_3.tif:0008-0922	0.997	35.318	0	302	43.785	66.56	0.708	35.215	6781	1.438	0.696	0.853	0.937929
1236	CEP89_KAN613-9_3.tif:0009-0976	1.033	48.03	0	304	133.633	70.343	0.796	49.636	9558	1.786	0.56	0.915	1.32204
1237	CEP89_KAN613-9_3.tif:0010-0977	0.758	7.062	0	37	178.615	70.402	0.907	5.354	1031	1.211	0.825	0.948	0.142605
1238	CEP89_KAN613-9_3.tif:0011-1112	0.473	12.473	0	54	82.405	80.119	0.786	5.894	1135	1.599	0.625	0.883	0.15699
1239	CEP89_KAN613-9_3.tif:0012-1361	0.649	14.32	0	157	59.151	98.133	0.936	9.296	1790	1.237	0.808	0.947	0.247588
1240	CEP89_KAN613-9_3.tif:0013-1584	0.467	12.011	0	47	27.483	114.173	0.907	5.614	1081	1.303	0.768	0.957	0.149521
1241	CEP89_KAN613-9_3.tif:0014-1626	0.618	5.487	0	29	95.706	117.182	0.917	3.391	653	1.266	0.79	0.941	0.0903211
1242	CEP89_KAN613-9_3.tif:0015-1709	0.732	5.298	0	29	173.822	123.166	0.924	3.879	747	1.232	0.812	0.943	0.103323
1243	CEP89_KAN613-9_3.tif:0016-1737	1.283	48.862	0	472	155.888	125.189	0.743	62.676	12069	2.017	0.496	0.908	1.66935
1244	CEP89_KAN613-9_3.tif:0017-1821	0.8	50.662	0	267	121.193	131.267	0.669	40.517	7802	1.917	0.522	0.828	1.07915
1245	CEP89_KAN613-9_3.tif:0018-1885	0.519	8.83	0	32	68.485	135.852	0.827	4.586	883	1.786	0.56	0.901	0.122134
1246	CEP89_KAN613-9_3.tif:0019-2067	0.592	15.123	0	150	148.699	148.962	0.853	8.953	1724	1.22	0.82	0.894	0.238459
1247	CEP89_KAN613-9_4.tif:0001-0188	0.675	31.892	0	130	105.886	13.576	0.861	21.531	4146	1.269	0.788	0.919	0.573463
1248	CEP89_KAN613-9_4.tif:0002-0275	0.587	85.894	0	331	158.574	19.787	0.908	50.405	9706	1.138	0.879	0.926	1.34251
1249	CEP89_KAN613-9_4.tif:0003-0380	0.649	95.328	0	380	50.779	27.429	0.936	61.882	11916	1.229	0.814	0.943	1.64819
1250	CEP89_KAN613-9_4.tif:0004-0445	0.904	78.971	0	539	138.595	32.084	0.826	71.359	13741	1.504	0.665	0.895	1.90062
1251	CEP89_KAN613-9_4.tif:0005-0523	0.561	46.796	0	180	156.481	37.668	0.867	26.246	5054	1.345	0.744	0.915	0.699055
1252	CEP89_KAN613-9_4.tif:0006-0577	0.748	85.312	0	353	83.12	41.583	0.863	63.798	12285	1.257	0.796	0.917	1.69923
1253	CEP89_KAN613-9_4.tif:0007-0646	0.898	56.15	0	294	59.97	46.535	0.877	50.446	9714	1.385	0.722	0.938	1.34361
1254	CEP89_KAN613-9_4.tif:0008-0738	0.893	69.709	0	344	177.038	53.156	0.795	62.266	11990	1.574	0.635	0.927	1.65842
1255	CEP89_KAN613-9_4.tif:0009-1146	0.831	61.85	0	354	136.882	82.623	0.948	51.391	9896	1.281	0.78	0.944	1.36879
1256	CEP89_KAN613-9_4.tif:0010-1198	0.644	75.831	0	288	41.443	86.406	0.854	48.831	9403	1.323	0.756	0.936	1.3006
1257	CEP89_KAN613-9_4.tif:0011-1218	0.753	62.683	0	238	72.554	87.787	0.901	47.201	9089	1.416	0.706	0.954	1.25716
1258	CEP89_KAN613-9_4.tif:0012-1236	0.914	58.881	0	256	103.066	89.105	0.662	53.817	10363	1.671	0.598	0.83	1.43338
1259	CEP89_KAN613-9_4.tif:0013-1301	1.044	73.05	0	499	149.819	93.751	0.772	76.251	14683	1.627	0.615	0.897	2.03091
1260	CEP89_KAN613-9_4.tif:0014-1565	0.883	34.647	0	146	174.276	112.763	0.882	30.588	5890	1.424	0.702	0.937	0.814688
1261	CEP89_KAN613-9_4.tif:0015-1589	0.499	14.333	0	65	57.006	114.547	0.924	7.146	1376	1.15	0.87	0.941	0.190324
1262	CEP89_KAN613-9_4.tif:0016-1614	1.007	48.356	0	339	99.325	116.351	0.817	48.717	9381	1.393	0.718	0.892	1.29755
1263	CEP89_KAN613-9_4.tif:0017-1669	0.576	34.306	0	223	90.223	120.294	0.918	19.776	3808	1.343	0.745	0.937	0.526712
1264	CEP89_KAN613-9_4.tif:0018-1719	1.111	69.425	0	506	144.89	123.948	0.767	77.155	14857	1.543	0.648	0.89	2.05498
1265	CEP89_KAN613-9_4.tif:0019-1762	1.085	31.522	0	331	160.031	126.954	0.737	34.212	6588	1.675	0.597	0.836	0.911233
1266	CEP89_KAN613-9_4.tif:0020-1859	0.509	28.52	0	91	113.92	134.009	0.913	14.515	2795	1.132	0.883	0.947	0.386596
1267	CEP89_KAN613-9_4.tif:0021-1990	0.452	130.483	0	482	65.222	143.396	0.877	58.953	11352	1.279	0.782	0.946	1.57018
1268	CEP89_KAN613-9_4.tif:0022-2115	0.81	49.705	0	322	115.046	152.466	0.837	40.268	7754	1.645	0.608	0.923	1.07251
1269	CEP89_KAN613-9_4.tif:0023-2179	0.784	53.411	0	308	152.69	157.007	0.691	41.883	8065	2.09	0.478	0.841	1.11553
1270	CEP89_KAN613-9_5.tif:0001-0452	0.774	15.416	0	74	115.55	32.636	0.828	11.929	2297	1.426	0.702	0.937	0.317715
1271	CEP89_KAN613-9_5.tif:0002-0523	0.613	25.042	0	121	111.109	37.734	0.883	15.346	2955	1.32	0.758	0.918	0.408727
1272	CEP89_KAN613-9_5.tif:0003-0586	0.982	47.28	0	352	88.098	42.345	0.747	46.406	8936	1.434	0.697	0.9	1.236
1273	CEP89_KAN613-9_5.tif:0004-0624	0.722	31.086	0	175	160.792	44.949	0.925	22.44	4321	1.307	0.765	0.917	0.597668
1274	CEP89_KAN613-9_5.tif:0005-0978	0.639	9.553	0	70	156.274	70.484	0.86	6.102	1175	1.647	0.607	0.935	0.162523
1275	CEP89_KAN613-9_5.tif:0006-0985	0.426	51.146	0	181	69.728	70.977	0.764	21.78	4194	1.872	0.534	0.877	0.580102
1276	CEP89_KAN613-9_5.tif:0007-0990	0.67	24.264	0	171	172.396	71.31	0.854	16.255	3130	1.161	0.861	0.918	0.432933
1277	CEP89_KAN613-9_5.tif:0008-1018	0.966	28.118	0	207	142.007	73.349	0.751	27.16	5230	1.636	0.611	0.882	0.723399
1278	CEP89_KAN613-9_5.tif:0009-1024	0.831	32.462	0	169	100.567	73.861	0.83	26.973	5194	1.363	0.734	0.889	0.718419
1279	CEP89_KAN613-9_5.tif:0010-1081	0.779	22.26	0	96	178.456	77.939	0.946	17.34	3339	1.153	0.868	0.94	0.461841
1280	CEP89_KAN613-9_5.tif:0011-1083	0.748	14.938	0	96	73.891	78.069	0.832	11.17	2151	1.64	0.61	0.903	0.29752
1281	CEP89_KAN613-9_5.tif:0012-1102	0.597	28.913	0	190	41.333	79.412	0.715	17.267	3325	2.065	0.484	0.885	0.459905
1282	CEP89_KAN613-9_5.tif:0013-1251	1.002	86.104	0	553	180.899	90.131	0.83	86.3	16618	1.425	0.702	0.904	2.29855
1283	CEP89_KAN613-9_5.tif:0014-1339	0.587	46.832	0	244	75.959	96.497	0.947	27.482	5292	1.21	0.826	0.974	0.731974
1284	CEP89_KAN613-9_5.tif:0015-1437	0.8	73.065	0	440	126.13	103.603	0.877	58.433	11252	1.376	0.727	0.942	1.55634
1285	CEP89_KAN613-9_5.tif:0016-1559	1.002	32.984	0	178	140.685	112.31	0.907	33.06	6366	1.165	0.858	0.913	0.880527
1286	CEP89_KAN613-9_5.tif:0017-1622	0.566	30.156	0	182	36.418	116.906	0.826	17.07	3287	1.351	0.74	0.916	0.454649
1287	CEP89_KAN613-9_5.tif:0018-1651	0.717	66.362	0	316	94.971	118.962	0.836	47.559	9158	1.447	0.691	0.942	1.26671
1288	CEP89_KAN613-9_5.tif:0019-1847	0.587	42	0	159	69.893	133.153	0.846	24.647	4746	1.492	0.67	0.904	0.656453
1289	CEP89_KAN613-9_5.tif:0020-1879	0.623	29.692	0	148	36.636	135.451	0.925	18.503	3563	1.23	0.813	0.934	0.492824
										6222.79				0.860719
1	CEP89_KAN613-10_1.tif:0001-0134	0.639	11.309	0	100	53.458	9.652	0.87	7.224	1391	1.509	0.663	0.943	0.192399
2	CEP89_KAN613-10_1.tif:0002-0158	0.441	118.659	0	289	157.079	11.397	0.868	52.378	10086	1.191	0.84	0.971	1.39507
3	CEP89_KAN613-10_1.tif:0003-0440	0.826	63.346	0	437	75.113	31.741	0.878	52.305	10072	1.504	0.665	0.903	1.39313
4	CEP89_KAN613-10_1.tif:0004-0524	1.028	46.071	0	364	102.165	37.717	0.715	47.372	9122	1.294	0.773	0.868	1.26173
5	CEP89_KAN613-10_1.tif:0005-0676	0.81	94.994	0	452	121.063	48.678	0.837	76.957	14819	1.232	0.812	0.907	2.04972
6	CEP89_KAN613-10_1.tif:0006-0738	0.597	6.522	0	41	142.784	53.157	0.886	3.895	750	1.289	0.776	0.916	0.103738
7	CEP89_KAN613-10_1.tif:0007-0822	0.587	15.053	0	166	76.543	59.273	0.856	8.834	1701	1.144	0.874	0.926	0.235278
8	CEP89_KAN613-10_1.tif:0008-0849	0.504	132.423	0	434	54.223	61.211	0.887	66.706	12845	1.221	0.819	0.99	1.77668
9	CEP89_KAN613-10_1.tif:0009-0911	1.122	41.769	0	267	160.533	65.636	0.812	46.853	9022	1.489	0.672	0.925	1.2479
10	CEP89_KAN613-10_1.tif:0010-1161	0.592	9.754	0	130	44.047	83.69	0.878	5.775	1112	1.525	0.656	0.931	0.153809
11	CEP89_KAN613-10_1.tif:0011-1173	1.22	91.906	0	628	115.615	84.536	0.747	112.162	21598	1.853	0.54	0.87	2.98737
12	CEP89_KAN613-10_1.tif:0012-1304	1.044	54.726	0	392	132.583	93.98	0.892	57.125	11000	1.083	0.923	0.937	1.52149
13	CEP89_KAN613-10_1.tif:0013-1567	1.075	60.715	0	379	59.083	112.919	0.785	65.267	12568	1.838	0.544	0.93	1.73837
14	CEP89_KAN613-10_1.tif:0014-1631	0.654	110.437	0	432	162.657	117.523	0.917	72.263	13915	1.097	0.911	0.947	1.92468
15	CEP89_KAN613-10_1.tif:0015-1819	0.462	6.64	0	50	109.536	131.084	0.927	3.069	591	1.1	0.909	0.947	0.0817454
16	CEP89_KAN613-10_1.tif:0016-1932	0.701	63.652	0	324	59.519	139.202	0.919	44.625	8593	1.108	0.903	0.944	1.18856
17	CEP89_KAN613-10_1.tif:0017-2083	0.904	61.736	0	462	84.2	150.109	0.853	55.785	10742	1.178	0.849	0.895	1.4858
18	CEP89_KAN613-10_1.tif:0018-2100	0.55	98.519	0	333	159.678	151.353	0.827	54.232	10443	1.407	0.711	0.91	1.44445
19	CEP89_KAN613-10_2.tif:0001-0161	0.691	49.098	0	326	85.167	11.667	0.848	33.911	6530	1.094	0.914	0.899	0.903211
20	CEP89_KAN613-10_2.tif:0002-0341	0.997	62.109	0	312	94.729	24.606	0.852	61.928	11925	1.528	0.655	0.923	1.64943
21	CEP89_KAN613-10_2.tif:0003-0504	0.514	7.98	0	90	166.716	36.329	0.922	4.103	790	1.332	0.751	0.961	0.109271
22	CEP89_KAN613-10_2.tif:0004-0797	0.701	71.311	0	287	63.549	57.423	0.861	49.994	9627	1.522	0.657	0.928	1.33158
23	CEP89_KAN613-10_2.tif:0005-0914	0.836	27.59	0	180	104.166	65.936	0.835	23.068	4442	1.409	0.71	0.902	0.614405
24	CEP89_KAN613-10_2.tif:0006-1233	1.283	76.279	0	560	131.111	88.888	0.806	97.844	18841	1.664	0.601	0.918	2.60603
25	CEP89_KAN613-10_2.tif:0007-1408	1.065	55.737	0	356	144.567	101.462	0.756	59.337	11426	1.663	0.601	0.887	1.58041
26	CEP89_KAN613-10_2.tif:0008-1424	1.179	50.639	0	330	140.82	102.71	0.776	59.695	11495	1.524	0.656	0.885	1.58996
27	CEP89_KAN613-10_2.tif:0009-1463	0.623	33.008	0	125	164.59	105.417	0.898	20.57	3961	1.349	0.742	0.934	0.547874
28	CEP89_KAN613-10_2.tif:0010-1469	0.743	12.867	0	132	188.653	105.869	0.661	9.555	1840	1.772	0.564	0.827	0.254504
29	CEP89_KAN613-10_2.tif:0011-1472	0.867	58.425	0	293	176.888	106.078	0.793	50.67	9757	1.749	0.572	0.888	1.34956
30	CEP89_KAN613-10_2.tif:0012-1507	0.862	56.41	0	272	84.53	108.601	0.67	48.629	9364	2.164	0.462	0.822	1.2952
31	CEP89_KAN613-10_2.tif:0013-1612	0.55	30.689	0	98	108.734	116.213	0.888	16.893	3253	1.07	0.934	0.938	0.449946
32	CEP89_KAN613-10_3.tif:0001-0118	0.447	62.302	0	190	70.412	8.54	0.909	27.825	5358	1.373	0.728	0.989	0.741103
33	CEP89_KAN613-10_3.tif:0002-0220	0.473	98.121	0	321	108.655	15.841	0.859	46.37	8929	1.542	0.649	0.978	1.23503
34	CEP89_KAN613-10_3.tif:0003-0392	1.075	54.7	0	342	141.655	28.334	0.804	58.802	11323	1.326	0.754	0.875	1.56617
35	CEP89_KAN613-10_3.tif:0004-0395	0.956	44.217	0	318	121.841	28.507	0.809	42.251	8136	1.166	0.858	0.878	1.12535
36	CEP89_KAN613-10_3.tif:0005-0396	0.447	9.5	0	35	53.887	28.564	0.896	4.243	817	1.341	0.746	0.945	0.113005
37	CEP89_KAN613-10_3.tif:0006-0607	1.044	89.025	0	507	125.833	43.716	0.788	92.926	17894	1.605	0.623	0.895	2.47505
38	CEP89_KAN613-10_3.tif:0007-0631	1.236	70.416	0	558	87.267	45.584	0.82	87.032	16759	1.432	0.698	0.928	2.31806
39	CEP89_KAN613-10_3.tif:0008-0735	0.628	24.983	0	168	141.582	52.969	0.944	15.699	3023	1.112	0.9	0.964	0.418133
40	CEP89_KAN613-10_3.tif:0009-0739	0.93	65.011	0	302	184.613	53.237	0.92	60.433	11637	1.183	0.845	0.927	1.6096
41	CEP89_KAN613-10_3.tif:0010-0850	0.654	68.651	0	312	153.821	61.237	0.835	44.921	8650	1.613	0.62	0.926	1.19644
42	CEP89_KAN613-10_3.tif:0011-0853	1.007	67.598	0	509	117.149	61.543	0.817	68.103	13114	1.705	0.587	0.928	1.81389
43	CEP89_KAN613-10_3.tif:0012-1059	1.272	58.404	0	569	148.299	76.38	0.831	74.309	14309	1.548	0.646	0.906	1.97918
44	CEP89_KAN613-10_3.tif:0013-1060	0.888	68.228	0	327	119.558	76.412	0.866	60.588	11667	1.163	0.86	0.924	1.61375
45	CEP89_KAN613-10_3.tif:0014-1074	0.774	43.671	0	309	46.206	77.404	0.698	33.792	6507	1.865	0.536	0.847	0.90003
46	CEP89_KAN613-10_3.tif:0015-1177	0.966	67.263	0	376	130.309	84.84	0.891	64.971	12511	1.373	0.728	0.939	1.73049
47	CEP89_KAN613-10_3.tif:0016-1185	1.293	109.265	0	666	146.34	85.439	0.828	141.29	27207	1.284	0.779	0.907	3.7632
48	CEP89_KAN613-10_3.tif:0017-1204	1.07	53.694	0	342	90.043	86.798	0.724	57.441	11061	1.593	0.628	0.864	1.52993
49	CEP89_KAN613-10_3.tif:0018-1364	0.727	65.779	0	231	112.942	98.331	0.857	47.824	9209	1.546	0.647	0.969	1.27376
50	CEP89_KAN613-10_3.tif:0019-1418	0.649	36.48	0	207	177.01	102.235	0.828	23.681	4560	1.404	0.712	0.919	0.630726
51	CEP89_KAN613-10_3.tif:0020-1444	0.634	84.516	0	356	61.166	104.054	0.888	53.547	10311	1.435	0.697	0.946	1.42619
52	CEP89_KAN613-10_3.tif:0021-1583	1.194	62.561	0	472	133.661	114.054	0.831	74.724	14389	1.281	0.781	0.933	1.99025
53	CEP89_KAN613-10_3.tif:0022-1598	0.878	71.355	0	333	88.411	115.111	0.734	62.624	12059	2.025	0.494	0.876	1.66797
54	CEP89_KAN613-10_3.tif:0023-1621	0.685	67.773	0	343	93.491	116.79	0.829	46.458	8946	1.535	0.652	0.936	1.23739
55	CEP89_KAN613-10_3.tif:0024-1745	0.904	72.747	0	439	140.141	125.806	0.894	65.735	12658	1.074	0.931	0.909	1.75082
56	CEP89_KAN613-10_3.tif:0025-1992	1.252	74.183	0	634	108.99	143.552	0.84	92.843	17878	1.364	0.733	0.918	2.47283
57	CEP89_KAN613-10_3.tif:0026-2030	1.101	59.458	0	402	141.784	146.298	0.769	65.46	12605	1.769	0.565	0.876	1.74349
58	CEP89_KAN613-10_3.tif:0027-2075	0.68	13.794	0	110	70.959	149.585	0.953	9.384	1807	1.167	0.857	0.967	0.249939
59	CEP89_KAN613-10_3.tif:0028-2152	0.561	14.454	0	58	82.791	155.092	0.894	8.107	1561	1.397	0.716	0.939	0.215913
60	CEP89_KAN613-10_4.tif:0001-0366	1.018	42.015	0	267	86.691	26.404	0.836	42.766	8235	1.396	0.716	0.893	1.13904
61	CEP89_KAN613-10_4.tif:0002-0503	0.795	50.882	0	309	105.269	36.284	0.871	40.429	7785	1.313	0.761	0.936	1.0768
62	CEP89_KAN613-10_4.tif:0003-0566	0.888	87.673	0	416	162.511	40.789	0.858	77.856	14992	1.274	0.785	0.898	2.07365
63	CEP89_KAN613-10_4.tif:0004-0570	0.784	55.914	0	298	67.952	41.095	0.811	43.846	8443	1.556	0.643	0.901	1.16781
64	CEP89_KAN613-10_4.tif:0005-0651	0.956	78.06	0	360	97.909	46.9	0.835	74.589	14363	1.572	0.636	0.915	1.98665
65	CEP89_KAN613-10_4.tif:0006-0725	0.956	89.625	0	535	81.71	52.275	0.862	85.64	16491	1.221	0.819	0.925	2.28099
66	CEP89_KAN613-10_4.tif:0007-0889	0.846	133.853	0	838	137.864	64.041	0.942	113.304	21818	1.223	0.818	0.945	3.0178
67	CEP89_KAN613-10_4.tif:0008-0983	0.68	137.031	0	599	119.752	70.861	0.902	93.222	17951	1.171	0.854	0.963	2.48293
68	CEP89_KAN613-10_4.tif:0009-1064	0.488	10.309	0	47	74.764	76.701	0.947	5.032	969	1.232	0.812	0.979	0.134029
69	CEP89_KAN613-10_4.tif:0010-1087	0.665	67.57	0	315	161.823	78.361	0.921	44.916	8649	1.116	0.896	0.931	1.19631
70	CEP89_KAN613-10_4.tif:0011-1184	0.685	95.826	0	378	40.691	85.276	0.82	65.688	12649	1.691	0.591	0.923	1.74957
71	CEP89_KAN613-10_4.tif:0012-1197	0.935	76.056	0	332	134.235	86.275	0.843	71.094	13690	1.231	0.812	0.918	1.89356
72	CEP89_KAN613-10_4.tif:0013-1241	0.685	63.523	0	254	55.405	89.485	0.874	43.545	8385	1.316	0.76	0.93	1.15979
73	CEP89_KAN613-10_4.tif:0014-1273	0.992	32.162	0	173	159.828	91.736	0.804	31.902	6143	1.589	0.629	0.905	0.849682
74	CEP89_KAN613-10_4.tif:0015-1279	0.904	53.046	0	298	182.335	92.133	0.853	47.933	9230	1.269	0.788	0.897	1.27667
75	CEP89_KAN613-10_4.tif:0016-1342	1.059	49.402	0	298	101.311	96.72	0.74	52.337	10078	1.967	0.508	0.868	1.39396
76	CEP89_KAN613-10_4.tif:0017-1455	0.618	78.664	0	330	72.456	104.875	0.866	48.613	9361	1.193	0.838	0.912	1.29479
77	CEP89_KAN613-10_4.tif:0018-1538	0.447	49.442	0	250	141.43	110.884	0.927	22.081	4252	1.391	0.719	0.95	0.588125
78	CEP89_KAN613-10_4.tif:0019-1687	0.846	82.141	0	410	163.934	121.593	0.897	69.531	13389	1.242	0.805	0.931	1.85193
79	CEP89_KAN613-10_4.tif:0020-1763	1.023	69.893	0	482	133.276	127.042	0.7	71.504	13769	1.874	0.534	0.837	1.90449
80	CEP89_KAN613-10_4.tif:0021-1983	0.441	23.376	0	65	127.766	142.929	0.962	10.319	1987	1.139	0.878	0.977	0.274836
										9764.19				1.35055
81	CEP89_KAN613-11_1.tif:0001-0301	0.462	14.258	0	96	167.017	21.738	0.897	6.59	1269	1.367	0.731	0.957	0.175524
82	CEP89_KAN613-11_1.tif:0002-0404	0.769	63.993	0	257	129.306	29.183	0.814	49.184	9471	1.858	0.538	0.908	1.31
83	CEP89_KAN613-11_1.tif:0003-0453	0.789	58.618	0	292	157.88	32.665	0.901	46.271	8910	1.097	0.912	0.91	1.23241
84	CEP89_KAN613-11_1.tif:0004-0531	1.241	41.008	0	318	89.214	38.37	0.67	50.898	9801	1.475	0.678	0.861	1.35565
85	CEP89_KAN613-11_1.tif:0005-0588	0.426	36.476	0	121	45.97	42.409	0.928	15.533	2991	1.383	0.723	0.965	0.413707
86	CEP89_KAN613-11_1.tif:0006-0589	1.033	77.005	0	454	165.108	42.518	0.838	79.58	15324	1.703	0.587	0.928	2.11957
87	CEP89_KAN613-11_1.tif:0007-0614	0.919	94.153	0	492	117.797	44.19	0.856	86.544	16665	1.112	0.899	0.932	2.30506
88	CEP89_KAN613-11_1.tif:0008-0706	0.649	66.712	0	296	153.916	50.877	0.936	43.306	8339	1.093	0.915	0.943	1.15343
89	CEP89_KAN613-11_1.tif:0009-0708	0.467	3.667	0	22	132.748	51.021	1	1.714	330	1.012	0.989	0.957	0.0456447
90	CEP89_KAN613-11_1.tif:0010-0741	0.467	4.056	0	20	70.589	53.441	0.938	1.895	365	1.238	0.808	0.957	0.0504858
91	CEP89_KAN613-11_1.tif:0011-0783	1.075	50.787	0	292	65.292	56.45	0.763	54.596	10513	1.625	0.615	0.885	1.45413
92	CEP89_KAN613-11_1.tif:0012-0875	0.924	52.792	0	338	97.341	63.094	0.67	48.8	9397	2.082	0.48	0.832	1.29977
93	CEP89_KAN613-11_1.tif:0013-0918	0.447	133.872	0	391	44.151	66.148	0.94	59.789	11513	1.123	0.891	0.983	1.59245
94	CEP89_KAN613-11_1.tif:0014-0988	1.335	62.852	0	438	135.238	71.206	0.663	83.885	16153	1.948	0.513	0.847	2.23424
95	CEP89_KAN613-11_1.tif:0015-1141	1.002	47.741	0	329	25.513	82.242	0.692	47.85	9214	2.017	0.496	0.85	1.27445
96	CEP89_KAN613-11_1.tif:0016-1165	0.914	43.858	0	249	163.839	83.954	0.883	40.086	7719	1.277	0.783	0.91	1.06767
97	CEP89_KAN613-11_1.tif:0017-1236	0.904	62.517	0	330	106.622	89.113	0.834	56.491	10878	1.263	0.792	0.904	1.50461
98	CEP89_KAN613-11_1.tif:0018-1377	0.722	64.288	0	299	47.2	99.238	0.921	46.406	8936	1.107	0.904	0.952	1.236
99	CEP89_KAN613-11_1.tif:0019-1379	1.2	88.264	0	699	122.05	99.386	0.708	105.883	20389	1.858	0.538	0.848	2.82015
100	CEP89_KAN613-11_1.tif:0020-1489	0.426	93.134	0	385	47.34	107.324	0.928	39.66	7637	1.398	0.715	0.97	1.05633
101	CEP89_KAN613-11_1.tif:0021-1586	0.467	11.189	0	94	169.846	114.292	0.97	5.229	1007	1.095	0.913	0.957	0.139285
102	CEP89_KAN613-11_1.tif:0022-1853	1.007	77	0	481	39.548	133.599	0.701	77.575	14938	1.881	0.532	0.88	2.06618
103	CEP89_KAN613-11_1.tif:0023-2029	0.582	13.018	0	63	59.313	146.2	0.911	7.572	1458	1.233	0.811	0.97	0.201666
104	CEP89_KAN613-11_2.tif:0001-0165	0.935	31.144	0	247	42.923	11.981	0.664	29.113	5606	1.436	0.696	0.824	0.775406
105	CEP89_KAN613-11_2.tif:0002-0286	1.111	59.902	0	498	123.596	20.597	0.805	66.571	12819	1.404	0.712	0.903	1.77309
106	CEP89_KAN613-11_2.tif:0003-0415	0.576	113.072	0	466	165.35	29.933	0.93	65.179	12551	1.117	0.896	0.965	1.73602
107	CEP89_KAN613-11_2.tif:0004-0448	0.971	76.39	0	515	105.935	32.303	0.896	74.184	14285	1.387	0.721	0.94	1.97586
108	CEP89_KAN613-11_2.tif:0005-0619	0.857	94.103	0	519	68.444	44.573	0.886	80.634	15527	1.097	0.912	0.938	2.14765
109	CEP89_KAN613-11_2.tif:0006-0699	0.639	23.228	0	135	147.203	50.4	0.806	14.837	2857	1.473	0.679	0.885	0.395172
110	CEP89_KAN613-11_2.tif:0007-0755	0.535	21.806	0	106	136.903	54.394	0.827	11.664	2246	1.366	0.732	0.896	0.31066
111	CEP89_KAN613-11_2.tif:0008-0892	0.545	71.21	0	323	71.994	64.31	0.869	38.829	7477	1.445	0.692	0.905	1.0342
112	CEP89_KAN613-11_2.tif:0009-0917	1.298	58.848	0	422	105.895	66.055	0.733	76.402	14712	1.195	0.837	0.862	2.03492
113	CEP89_KAN613-11_2.tif:0010-0973	1.22	55	0	438	181.516	70.059	0.739	67.121	12925	1.852	0.54	0.888	1.78775
114	CEP89_KAN613-11_2.tif:0011-1056	1.163	56.665	0	508	151.985	76.068	0.745	65.917	12693	1.245	0.803	0.867	1.75566
115	CEP89_KAN613-11_2.tif:0012-1279	0.431	8.602	0	32	75.915	92.157	0.94	3.708	714	1.137	0.879	0.965	0.0987585
116	CEP89_KAN613-11_2.tif:0013-1375	0.914	51.994	0	224	65.976	99.036	0.824	47.522	9151	1.14	0.877	0.898	1.26574
117	CEP89_KAN613-11_2.tif:0014-1444	0.774	50.289	0	300	41.837	104.088	0.84	38.912	7493	1.564	0.639	0.9	1.03641
118	CEP89_KAN613-11_2.tif:0015-1481	0.722	24.561	0	185	137.244	106.764	0.896	17.729	3414	1.058	0.945	0.959	0.472215
119	CEP89_KAN613-11_2.tif:0016-1510	0.914	115.795	0	544	159.731	108.849	0.892	105.836	20380	1.077	0.928	0.934	2.8189
120	CEP89_KAN613-11_2.tif:0017-2023	1.007	60.314	0	416	73.548	145.741	0.751	60.765	11701	1.566	0.639	0.882	1.61845
121	CEP89_KAN613-11_2.tif:0018-2147	0.8	48.792	0	277	57.598	154.712	0.654	39.021	7514	2.578	0.388	0.858	1.03932
122	CEP89_KAN613-11_3.tif:0001-0465	1.018	51.01	0	309	162.118	33.578	0.784	51.921	9998	1.788	0.559	0.881	1.3829
123	CEP89_KAN613-11_3.tif:0002-0500	0.841	66.728	0	387	47.255	36.046	0.759	56.138	10810	1.694	0.59	0.876	1.49521
124	CEP89_KAN613-11_3.tif:0003-0737	0.587	20.628	0	161	19.522	53.123	0.923	12.105	2331	1.322	0.757	0.904	0.322417
125	CEP89_KAN613-11_3.tif:0004-0995	0.55	32.321	0	157	1.904	71.702	0.993	17.792	3426	1.087	0.92	0.934	0.473875
126	CEP89_KAN613-11_3.tif:0005-1058	0.763	77.027	0	349	100.979	76.241	0.837	58.802	11323	1.621	0.617	0.93	1.56617
127	CEP89_KAN613-11_3.tif:0006-1205	1.07	75.942	0	379	152.79	86.864	0.86	81.242	15644	1.396	0.716	0.928	2.16383
128	CEP89_KAN613-11_3.tif:0007-1222	0.623	30.525	0	120	52.656	88.064	0.952	19.022	3663	1.062	0.941	0.93	0.506656
129	CEP89_KAN613-11_3.tif:0008-1231	0.691	37.211	0	183	73.687	88.754	0.93	25.701	4949	1.082	0.924	0.943	0.684532
130	CEP89_KAN613-11_3.tif:0009-1334	0.493	16.295	0	101	170.532	96.132	0.944	8.039	1548	1.133	0.883	0.941	0.214115
131	CEP89_KAN613-11_3.tif:0010-1421	1.293	82.345	0	671	128.324	102.429	0.819	106.48	20504	1.223	0.818	0.919	2.83606
132	CEP89_KAN613-11_3.tif:0011-1479	0.821	90.367	0	368	36.722	106.607	0.878	74.148	14278	1.302	0.768	0.952	1.97489
133	CEP89_KAN613-11_3.tif:0012-1481	0.566	6.789	0	32	181.292	106.719	0.959	3.843	740	1.288	0.776	0.944	0.102355
134	CEP89_KAN613-11_3.tif:0013-1526	0.992	86.209	0	534	113.512	109.93	0.859	85.51	16466	1.484	0.674	0.925	2.27753
135	CEP89_KAN613-11_3.tif:0014-1549	0.592	23.868	0	140	186.484	111.605	0.853	14.131	2721	1.372	0.729	0.916	0.376361
136	CEP89_KAN613-11_3.tif:0015-1578	0.727	19.564	0	126	82.496	113.688	0.917	14.224	2739	1.272	0.786	0.94	0.378851
137	CEP89_KAN613-11_3.tif:0016-1763	0.961	67.184	0	381	157.518	127.063	0.858	64.546	12429	1.269	0.788	0.902	1.71914
138	CEP89_KAN613-11_3.tif:0017-1804	0.956	75.033	0	406	99.238	130.074	0.882	71.697	13806	1.169	0.856	0.918	1.90961
139	CEP89_KAN613-11_3.tif:0018-1810	0.602	48.095	0	211	40.306	130.438	0.932	28.973	5579	1.09	0.917	0.947	0.771671
140	CEP89_KAN613-11_3.tif:0019-1909	1.288	98.827	0	549	141.854	137.604	0.803	127.279	24509	1.661	0.602	0.903	3.39002
141	CEP89_KAN613-11_3.tif:0020-1995	0.504	247.289	0	1381	80.78	143.763	0.946	124.568	23987	1.026	0.974	0.985	3.31781
142	CEP89_KAN613-11_3.tif:0021-2008	1.018	59.082	0	434	66.575	144.689	0.791	60.137	11580	1.724	0.58	0.912	1.60171
143	CEP89_KAN613-11_4.tif:0001-0048	0.441	122.529	0	474	112.806	3.468	0.929	54.087	10415	1.185	0.844	0.977	1.44057
144	CEP89_KAN613-11_4.tif:0002-0226	0.566	14.028	0	99	155.66	16.289	0.875	7.94	1529	1.352	0.74	0.936	0.211487
145	CEP89_KAN613-11_4.tif:0003-0229	0.644	22.774	0	182	134.008	16.507	0.944	14.665	2824	1.323	0.756	0.929	0.390608
146	CEP89_KAN613-11_4.tif:0004-0430	1.163	154.897	0	590	94.469	30.967	0.766	180.187	34697	1.489	0.672	0.877	4.79919
147	CEP89_KAN613-11_4.tif:0005-0698	0.499	45.583	0	205	73.721	50.344	0.924	22.725	4376	1.204	0.831	0.941	0.605276
148	CEP89_KAN613-11_4.tif:0006-0745	0.571	5.682	0	33	148.797	53.692	0.95	3.246	625	1.186	0.843	0.965	0.0864482
149	CEP89_KAN613-11_4.tif:0007-1006	0.613	7.127	0	30	189.856	72.5	0.948	4.367	841	1.149	0.87	0.955	0.116325
150	CEP89_KAN613-11_4.tif:0008-1048	1.309	62.512	0	506	166.085	75.458	0.672	81.808	15753	1.987	0.503	0.832	2.17891
151	CEP89_KAN613-11_4.tif:0009-1154	0.54	102.529	0	313	53.375	83.203	0.871	55.375	10663	1.537	0.651	0.941	1.47488
152	CEP89_KAN613-11_4.tif:0010-1302	1.283	40.036	0	306	143.838	93.761	0.654	51.355	9889	1.993	0.502	0.825	1.36782
153	CEP89_KAN613-11_4.tif:0011-1410	0.904	69.529	0	284	98.316	101.601	0.815	62.827	12098	1.529	0.654	0.899	1.67336
154	CEP89_KAN613-11_4.tif:0012-1647	0.478	29.076	0	260	90.96	118.756	0.795	13.892	2675	1.781	0.562	0.902	0.369998
155	CEP89_KAN613-11_4.tif:0013-1667	1.272	55.478	0	405	112.269	120.104	0.699	70.585	13592	2.298	0.435	0.916	1.88001
156	CEP89_KAN613-11_4.tif:0014-1802	0.452	8.322	0	32	179.878	129.861	0.971	3.76	724	1.039	0.962	0.946	0.100142
										9355.43				1.29402
157	CEP89_KAN613-12_1.tif:0001-0077	0.54	13.202	0	115	139.553	5.582	0.898	7.13	1373	1.515	0.66	0.959	0.189909
158	CEP89_KAN613-12_1.tif:0002-0133	0.473	22.022	0	182	61.917	9.57	0.981	10.407	2004	1.109	0.901	0.968	0.277188
159	CEP89_KAN613-12_1.tif:0003-0174	0.561	22.769	0	142	107.62	12.614	0.842	12.77	2459	1.47	0.68	0.935	0.340122
160	CEP89_KAN613-12_1.tif:0004-0221	0.504	25.423	0	137	163.85	15.924	0.904	12.806	2466	1.387	0.721	0.951	0.34109
161	CEP89_KAN613-12_1.tif:0005-0229	0.592	24.342	0	148	56.022	16.515	0.797	14.411	2775	1.545	0.647	0.874	0.38383
162	CEP89_KAN613-12_1.tif:0006-0335	0.904	56.54	0	279	146.071	24.114	0.894	51.09	9838	1.218	0.821	0.911	1.36076
163	CEP89_KAN613-12_1.tif:0007-0441	0.566	18.817	0	180	69.369	31.795	0.913	10.651	2051	1.45	0.69	0.978	0.283689
164	CEP89_KAN613-12_1.tif:0008-0471	0.93	98.106	0	486	98.167	33.961	0.858	91.197	17561	1.179	0.848	0.913	2.42899
165	CEP89_KAN613-12_1.tif:0009-0709	0.597	30.774	0	117	94.223	51.113	0.861	18.379	3539	1.337	0.748	0.913	0.489504
166	CEP89_KAN613-12_1.tif:0010-0735	0.582	34.786	0	180	161.483	53.01	0.911	20.233	3896	1.055	0.948	0.974	0.538884
167	CEP89_KAN613-12_1.tif:0011-0757	1.252	64.423	0	435	84.488	54.564	0.833	80.629	15526	1.759	0.569	0.941	2.14751
168	CEP89_KAN613-12_1.tif:0012-0826	0.862	97.512	0	530	120.519	59.543	0.891	84.061	16187	1.327	0.754	0.96	2.23894
169	CEP89_KAN613-12_1.tif:0013-0851	0.426	8.549	0	39	40.962	61.32	0.962	3.64	701	1.166	0.858	0.959	0.0969603
170	CEP89_KAN613-12_1.tif:0014-0912	0.815	52.497	0	287	103.234	65.76	0.864	42.802	8242	1.234	0.81	0.908	1.14001
171	CEP89_KAN613-12_1.tif:0015-1005	0.639	93.528	0	584	97.191	72.44	0.837	59.742	11504	1.517	0.659	0.921	1.5912
172	CEP89_KAN613-12_1.tif:0016-1061	0.717	36.754	0	181	160.748	76.509	0.815	26.34	5072	1.18	0.848	0.911	0.701545
173	CEP89_KAN613-12_1.tif:0017-1085	0.441	32.635	0	121	172.721	78.197	0.916	14.406	2774	1.382	0.724	0.944	0.383692
174	CEP89_KAN613-12_1.tif:0018-1101	0.519	120.56	0	420	57.282	79.397	0.962	62.609	12056	1.185	0.844	0.966	1.66755
175	CEP89_KAN613-12_1.tif:0019-1104	1.028	98.99	0	704	126.373	79.614	0.86	101.786	19600	1.255	0.797	0.943	2.71102
176	CEP89_KAN613-12_1.tif:0020-1289	0.504	36.412	0	230	82.708	92.921	0.838	18.342	3532	1.553	0.644	0.915	0.488536
177	CEP89_KAN613-12_1.tif:0021-1299	1.044	109.716	0	505	132.195	93.614	0.941	114.524	22053	1.061	0.943	0.966	3.05031
178	CEP89_KAN613-12_1.tif:0022-1381	0.81	64.692	0	338	91.557	99.475	0.902	52.409	10092	1.225	0.816	0.915	1.3959
179	CEP89_KAN613-12_1.tif:0023-1433	0.95	54.563	0	409	112.709	103.233	0.849	51.854	9985	1.519	0.658	0.897	1.3811
180	CEP89_KAN613-12_1.tif:0024-1508	0.774	60.047	0	288	129.983	108.65	0.893	46.463	8947	1.188	0.842	0.928	1.23752
181	CEP89_KAN613-12_1.tif:0025-1708	0.457	28.739	0	186	181.493	123.141	0.794	13.133	2529	1.494	0.669	0.898	0.349804
182	CEP89_KAN613-12_1.tif:0026-1752	0.997	63.021	0	310	109.324	126.316	0.891	62.837	12100	1.311	0.763	0.934	1.67364
183	CEP89_KAN613-12_1.tif:0027-1771	0.628	27.702	0	180	93.885	127.632	0.87	17.407	3352	1.384	0.723	0.903	0.463639
184	CEP89_KAN613-12_1.tif:0028-1920	0.763	80.517	0	401	156.044	138.404	0.89	61.466	11836	1.446	0.691	0.951	1.63712
185	CEP89_KAN613-12_1.tif:0029-2077	0.504	40.546	0	154	57.387	149.712	0.892	20.425	3933	1.629	0.614	0.924	0.544001
186	CEP89_KAN613-12_2.tif:0001-0118	0.623	20.792	0	113	65.67	8.535	0.898	12.957	2495	1.296	0.771	0.92	0.345101
187	CEP89_KAN613-12_2.tif:0002-0122	0.872	48.161	0	257	70.615	8.749	0.813	42.018	8091	1.621	0.617	0.928	1.11912
188	CEP89_KAN613-12_2.tif:0003-0288	0.608	21.957	0	117	110.753	20.739	0.876	13.341	2569	1.427	0.701	0.932	0.355337
189	CEP89_KAN613-12_2.tif:0004-0308	0.576	17.432	0	133	37.21	22.224	0.918	10.049	1935	1.312	0.762	0.945	0.267644
190	CEP89_KAN613-12_2.tif:0005-0428	0.867	81.976	0	372	83.992	30.894	0.896	71.094	13690	1.315	0.76	0.944	1.89356
191	CEP89_KAN613-12_2.tif:0006-0540	0.743	49.49	0	205	91.432	38.903	0.857	36.752	7077	1.606	0.623	0.932	0.978871
192	CEP89_KAN613-12_2.tif:0007-0571	0.54	87.933	0	260	53.011	41.153	0.898	47.491	9145	1.181	0.847	0.941	1.26491
193	CEP89_KAN613-12_2.tif:0008-0584	0.711	59.628	0	278	176.512	42.125	0.851	42.423	8169	1.37	0.73	0.91	1.12991
194	CEP89_KAN613-12_2.tif:0009-0657	0.436	29.738	0	84	55.838	47.386	0.835	12.972	2498	1.655	0.604	0.908	0.345516
195	CEP89_KAN613-12_2.tif:0010-0704	0.815	41.433	0	151	125.501	50.717	0.965	33.781	6505	1.098	0.911	0.949	0.899753
196	CEP89_KAN613-12_2.tif:0011-0729	0.691	66.195	0	365	164.403	52.493	0.805	45.72	8804	1.798	0.556	0.933	1.21774
197	CEP89_KAN613-12_2.tif:0012-0732	0.872	59.619	0	297	64.395	52.78	0.851	52.015	10016	1.34	0.746	0.923	1.38538
198	CEP89_KAN613-12_2.tif:0013-0941	0.826	49.239	0	209	145.227	67.9	0.845	40.657	7829	1.527	0.655	0.916	1.08289
199	CEP89_KAN613-12_2.tif:0014-1091	0.488	30.457	0	118	86.915	78.599	0.922	14.868	2863	1.377	0.726	0.913	0.396002
200	CEP89_KAN613-12_2.tif:0015-1152	1.111	74.056	0	493	46.85	82.963	0.686	82.301	15848	1.898	0.527	0.858	2.19205
201	CEP89_KAN613-12_2.tif:0016-1288	0.639	14.756	0	48	181.461	92.866	0.976	9.426	1815	1.251	0.8	0.953	0.251046
202	CEP89_KAN613-12_2.tif:0017-1323	0.909	90.149	0	453	124.195	95.34	0.809	81.927	15776	1.516	0.659	0.933	2.18209
203	CEP89_KAN613-12_2.tif:0018-1348	0.545	47.143	0	150	107.544	97.174	0.965	25.706	4950	1.001	0.999	0.946	0.68467
204	CEP89_KAN613-12_2.tif:0019-1353	0.821	45.911	0	201	171.984	97.484	0.891	37.671	7254	1.079	0.927	0.924	1.00335
205	CEP89_KAN613-12_2.tif:0020-1428	0.758	92.363	0	438	183.158	102.984	0.792	70.03	13485	1.437	0.696	0.91	1.86521
206	CEP89_KAN613-12_2.tif:0021-1488	0.66	13.559	0	114	38.071	107.281	0.94	8.943	1722	1.256	0.796	0.927	0.238182
207	CEP89_KAN613-12_2.tif:0022-1540	0.711	18.745	0	75	93.86	110.981	0.864	13.336	2568	1.423	0.703	0.907	0.355198
208	CEP89_KAN613-12_2.tif:0023-1591	0.462	15.933	0	129	47.321	114.628	0.927	7.364	1418	1.253	0.798	0.973	0.196134
209	CEP89_KAN613-12_2.tif:0024-1717	0.898	78.017	0	491	141.038	123.751	0.751	70.092	13497	1.777	0.563	0.872	1.86687
210	CEP89_KAN613-12_2.tif:0025-1890	0.857	55.291	0	298	109.922	136.25	0.809	47.377	9123	1.438	0.695	0.889	1.26187
211	CEP89_KAN613-12_2.tif:0026-1897	0.831	53.837	0	300	162.069	136.69	0.925	44.734	8614	1.04	0.961	0.928	1.19146
212	CEP89_KAN613-12_2.tif:0027-1901	0.789	66.178	0	254	96.368	137.029	0.836	52.238	10059	1.524	0.656	0.905	1.39133
213	CEP89_KAN613-12_2.tif:0028-2024	0.488	40.957	0	209	121.937	145.865	0.934	19.994	3850	1.134	0.882	0.935	0.532521
214	CEP89_KAN613-12_3.tif:0001-0075	0.623	71.783	0	307	109.897	5.398	0.873	44.734	8614	1.337	0.748	0.923	1.19146
215	CEP89_KAN613-12_3.tif:0002-0130	0.556	19.43	0	64	143.56	9.367	0.885	10.797	2079	1.291	0.775	0.915	0.287561
216	CEP89_KAN613-12_3.tif:0003-0340	0.488	10.223	0	55	132.088	24.541	0.934	4.991	961	1.188	0.842	0.931	0.132923
217	CEP89_KAN613-12_3.tif:0004-0398	0.935	87.494	0	448	117.268	28.71	0.871	81.787	15749	1.249	0.8	0.93	2.17836
218	CEP89_KAN613-12_3.tif:0005-0420	0.685	28.341	0	131	158.326	30.299	0.923	19.428	3741	1.343	0.744	0.95	0.517445
219	CEP89_KAN613-12_3.tif:0006-0496	0.758	56.658	0	295	103.053	35.761	0.931	42.958	8272	1.271	0.787	0.945	1.14416
220	CEP89_KAN613-12_3.tif:0007-0499	0.997	101.766	0	582	76.058	35.991	0.852	101.469	19539	1.442	0.694	0.921	2.70258
221	CEP89_KAN613-12_3.tif:0008-0575	0.53	6.755	0	62	36.69	41.405	0.909	3.578	689	1.25	0.8	0.932	0.0953005
222	CEP89_KAN613-12_3.tif:0009-0655	0.691	37.564	0	156	79.517	47.207	0.93	25.945	4996	1.207	0.829	0.94	0.691033
223	CEP89_KAN613-12_3.tif:0010-0717	0.732	73.525	0	297	175.373	51.662	0.899	53.837	10367	1.148	0.871	0.937	1.43393
224	CEP89_KAN613-12_3.tif:0011-0823	0.961	78.027	0	480	137.751	59.316	0.847	74.963	14435	1.615	0.619	0.951	1.99661
225	CEP89_KAN613-12_3.tif:0012-0829	0.441	7.518	0	34	108.21	59.783	0.949	3.318	639	1.295	0.772	0.939	0.0883847
226	CEP89_KAN613-12_3.tif:0013-0920	0.441	174.647	0	923	168.727	66.301	0.929	77.092	14845	1.114	0.897	0.971	2.05332
227	CEP89_KAN613-12_3.tif:0014-1136	0.514	28.162	0	125	113.141	81.854	0.94	14.478	2788	1.283	0.779	0.93	0.385628
228	CEP89_KAN613-12_3.tif:0015-1171	0.452	21.609	0	192	42.838	84.424	0.971	9.763	1880	1.264	0.791	0.946	0.260036
229	CEP89_KAN613-12_3.tif:0016-1357	0.836	29.919	0	129	108.847	97.817	0.908	25.015	4817	1.323	0.756	0.944	0.666274
230	CEP89_KAN613-12_3.tif:0017-1367	1.018	44.612	0	272	75.645	98.474	0.717	45.409	8744	1.756	0.57	0.865	1.20945
231	CEP89_KAN613-12_3.tif:0018-1598	0.909	67.051	0	354	92.742	115.126	0.858	60.936	11734	1.483	0.675	0.921	1.62301
232	CEP89_KAN613-12_3.tif:0019-1909	0.753	62.49	0	327	57.083	137.564	0.76	47.055	9061	1.554	0.644	0.868	1.25329
233	CEP89_KAN613-12_3.tif:0020-1940	1.059	54.623	0	394	148.006	139.866	0.761	57.867	11143	1.637	0.611	0.881	1.54127
234	CEP89_KAN613-12_4.tif:0001-0306	0.685	11.492	0	49	152.723	22.096	0.888	7.878	1517	1.407	0.711	0.907	0.209827
235	CEP89_KAN613-12_4.tif:0002-0457	0.592	18.763	0	63	43.028	32.987	0.972	11.108	2139	1.06	0.944	0.946	0.29586
236	CEP89_KAN613-12_4.tif:0003-0515	1.091	57.252	0	431	124.898	37.148	0.738	62.437	12023	1.602	0.624	0.87	1.66299
237	CEP89_KAN613-12_4.tif:0004-0977	1.07	53.694	0	264	162.678	70.367	0.831	57.441	11061	1.358	0.737	0.93	1.52993
238	CEP89_KAN613-12_4.tif:0005-1059	0.758	14.589	0	74	73.582	76.291	0.811	11.061	2130	1.366	0.732	0.904	0.294616
239	CEP89_KAN613-12_4.tif:0006-1453	1.387	63.985	0	460	135.17	104.632	0.696	88.72	17084	1.723	0.581	0.841	2.36301
240	CEP89_KAN613-12_4.tif:0007-1513	0.431	17.458	0	71	156.693	109.041	0.974	7.525	1449	1.143	0.875	0.965	0.200422
241	CEP89_KAN613-12_4.tif:0008-1722	0.722	60.921	0	331	102.958	124.088	0.887	43.976	8468	1.235	0.81	0.911	1.17127
242	CEP89_KAN613-12_4.tif:0009-1762	0.53	10.51	0	48	67.761	127.03	0.909	5.567	1072	1.436	0.696	0.944	0.148276
243	CEP89_KAN613-12_4.tif:0010-1818	1.101	52.703	0	357	93.016	131.054	0.731	58.023	11173	2.302	0.434	0.932	1.54542
244	CEP89_KAN613-12_4.tif:0011-1860	0.535	33.194	0	101	162.345	134.084	0.89	17.755	3419	1.163	0.86	0.941	0.472906
245	CEP89_KAN613-12_4.tif:0012-1902	0.483	74.226	0	273	143.264	137.071	0.725	35.848	6903	1.885	0.531	0.861	0.954803
246	CEP89_KAN613-12_4.tif:0013-1925	0.54	5.067	0	28	47.048	138.715	0.871	2.737	527	1.75	0.572	0.967	0.0728931
247	CEP89_KAN613-12_4.tif:0014-1929	0.602	73.517	0	311	175.519	139.005	0.768	44.287	8528	1.946	0.514	0.892	1.17957
										7527.79				1.04122
248	CEP89_KAN613-13_1.tif:0001-0167	0.717	52.739	0	237	147.914	12.023	0.918	37.796	7278	1.4	0.714	0.914	1.00667
249	CEP89_KAN613-13_1.tif:0002-0363	0.514	86.96	0	370	68.844	26.122	0.829	44.708	8609	1.461	0.685	0.921	1.19077
250	CEP89_KAN613-13_1.tif:0003-0451	1.179	60.815	0	402	44.599	32.505	0.741	71.691	13805	1.927	0.519	0.873	1.90947
251	CEP89_KAN613-13_1.tif:0004-0472	0.618	85.05	0	260	59.483	34.002	0.668	52.56	10121	2.113	0.473	0.875	1.39991
252	CEP89_KAN613-13_1.tif:0005-0558	0.623	3.492	0	22	169.597	40.274	0.849	2.176	419	1.689	0.592	0.956	0.0579549
253	CEP89_KAN613-13_1.tif:0006-0633	1.371	37.091	0	288	141.267	45.609	0.734	50.851	9792	1.272	0.786	0.883	1.3544
254	CEP89_KAN613-13_1.tif:0007-0678	0.795	57.575	0	246	153.154	48.846	0.794	45.746	8809	1.189	0.841	0.874	1.21844
255	CEP89_KAN613-13_1.tif:0008-0736	0.66	21.528	0	114	125.022	53.069	0.913	14.198	2734	1.471	0.68	0.944	0.378159
256	CEP89_KAN613-13_1.tif:0009-0809	0.493	6.779	0	28	175.557	58.303	0.914	3.344	644	1.306	0.766	0.955	0.0890763
257	CEP89_KAN613-13_1.tif:0010-0824	0.763	44.299	0	196	100.152	59.364	0.894	33.818	6512	1.415	0.707	0.91	0.900721
258	CEP89_KAN613-13_1.tif:0011-0828	0.483	123.022	0	428	69.649	59.705	0.937	59.415	11441	1.237	0.809	0.969	1.58249
259	CEP89_KAN613-13_1.tif:0012-0989	0.53	12.392	0	98	47.462	71.263	0.844	6.564	1264	1.516	0.659	0.887	0.174833
260	CEP89_KAN613-13_1.tif:0013-1021	0.441	60.541	0	214	1.548	73.561	0.818	26.724	5146	1.713	0.584	0.904	0.71178
261	CEP89_KAN613-13_1.tif:0014-1061	0.504	8.495	0	35	133.825	76.498	0.964	4.279	824	1.177	0.85	0.946	0.113973
262	CEP89_KAN613-13_1.tif:0015-1093	1.288	71.673	0	558	164.159	78.757	0.668	92.308	17775	2.096	0.477	0.848	2.45859
263	CEP89_KAN613-13_1.tif:0016-1156	1.226	60.758	0	399	118.131	83.343	0.71	74.465	14339	1.959	0.511	0.861	1.98333
264	CEP89_KAN613-13_1.tif:0017-1225	0.992	26.141	0	274	151.513	88.313	0.822	25.929	4993	1.561	0.64	0.916	0.690618
265	CEP89_KAN613-13_1.tif:0018-1279	0.971	56.455	0	466	130.016	92.178	0.739	54.824	10557	1.531	0.653	0.868	1.46021
266	CEP89_KAN613-13_1.tif:0019-1300	1.033	40.648	0	240	68.914	93.645	0.742	42.007	8089	1.284	0.779	0.852	1.11885
267	CEP89_KAN613-13_1.tif:0020-1338	0.649	13.024	0	77	90.986	96.368	0.738	8.454	1628	1.288	0.777	0.868	0.22518
268	CEP89_KAN613-13_1.tif:0021-1426	0.841	59.957	0	255	145.043	102.811	0.821	50.441	9713	1.48	0.676	0.905	1.34347
269	CEP89_KAN613-13_1.tif:0022-1458	0.95	60.126	0	355	182.825	105.079	0.739	57.14	11003	1.816	0.551	0.882	1.5219
270	CEP89_KAN613-13_1.tif:0023-1715	0.805	16.213	0	143	135.987	123.626	0.953	13.05	2513	1.277	0.783	0.948	0.347591
271	CEP89_KAN613-13_1.tif:0024-1723	1.231	62.768	0	390	167.703	124.151	0.765	77.253	14876	1.975	0.506	0.942	2.05761
272	CEP89_KAN613-13_1.tif:0025-1902	0.867	40.365	0	281	123.752	137.03	0.732	35.007	6741	1.508	0.663	0.877	0.932396
273	CEP89_KAN613-13_2.tif:0001-0030	0.706	50.088	0	237	115.021	2.18	0.775	35.376	6812	1.708	0.585	0.892	0.942217
274	CEP89_KAN613-13_2.tif:0002-0043	0.483	10.022	0	61	78.819	3.125	0.855	4.84	932	1.24	0.807	0.903	0.128912
275	CEP89_KAN613-13_2.tif:0003-0263	0.904	56.213	0	258	87.411	18.979	0.789	50.794	9781	1.781	0.562	0.899	1.35288
276	CEP89_KAN613-13_2.tif:0004-0681	1.039	49.27	0	269	127.525	49.095	0.684	51.173	9854	1.743	0.574	0.855	1.36298
277	CEP89_KAN613-13_2.tif:0005-0793	0.426	40.939	0	127	27.427	57.145	0.962	17.433	3357	1.209	0.827	0.965	0.464331
278	CEP89_KAN613-13_2.tif:0006-0861	0.426	12.756	0	59	142.729	62.049	0.843	5.432	1046	1.74	0.575	0.921	0.14468
279	CEP89_KAN613-13_2.tif:0007-0896	0.675	14.562	0	118	136.56	64.547	0.875	9.831	1893	1.382	0.724	0.919	0.261834
280	CEP89_KAN613-13_2.tif:0008-1069	1.184	52.583	0	302	90.841	77.047	0.811	62.261	11989	1.498	0.668	0.912	1.65828
281	CEP89_KAN613-13_2.tif:0009-1173	0.696	33.754	0	219	144.427	84.477	0.878	23.489	4523	1.205	0.83	0.924	0.625609
282	CEP89_KAN613-13_2.tif:0010-1258	0.582	16.491	0	89	174.824	90.667	0.829	9.592	1847	1.418	0.705	0.868	0.255472
283	CEP89_KAN613-13_2.tif:0011-1267	0.956	56.266	0	232	124.259	91.346	0.782	53.765	10353	1.545	0.647	0.902	1.432
284	CEP89_KAN613-13_2.tif:0012-1297	0.447	136.709	0	492	101.17	93.508	0.94	61.056	11757	1.16	0.862	0.983	1.62619
285	CEP89_KAN613-13_2.tif:0013-1385	1.2	67.45	0	483	151.584	99.888	0.732	80.914	15581	1.83	0.547	0.913	2.15512
286	CEP89_KAN613-13_2.tif:0014-1454	0.665	5.25	0	22	3.873	104.786	0.921	3.49	672	1.447	0.691	0.945	0.0929491
287	CEP89_KAN613-13_2.tif:0015-1550	0.483	10.624	0	64	90.338	111.696	0.866	5.131	988	1.325	0.755	0.93	0.136657
288	CEP89_KAN613-13_2.tif:0016-1727	0.883	47.629	0	377	112.539	124.454	0.745	42.049	8097	2.259	0.443	0.924	1.11995
289	CEP89_KAN613-13_2.tif:0017-1896	0.592	14.895	0	110	81.675	136.658	0.943	8.818	1698	1.345	0.743	0.954	0.234863
290	CEP89_KAN613-13_3.tif:0001-0101	0.779	62.507	0	368	78.444	7.346	0.908	48.691	9376	1.381	0.724	0.971	1.29686
291	CEP89_KAN613-13_3.tif:0002-0218	0.582	23.848	0	135	107.119	15.717	0.899	13.871	2671	1.339	0.747	0.953	0.369445
292	CEP89_KAN613-13_3.tif:0003-0311	0.81	77.494	0	387	64.564	22.436	0.817	62.78	12089	1.726	0.579	0.92	1.67212
293	CEP89_KAN613-13_3.tif:0004-0398	0.499	27.01	0	224	166.796	28.719	0.883	13.466	2593	1.365	0.733	0.91	0.358656
294	CEP89_KAN613-13_3.tif:0005-0463	0.872	113.292	0	566	137.919	33.406	0.86	98.841	19033	1.287	0.777	0.939	2.63259
295	CEP89_KAN613-13_3.tif:0006-0646	0.717	17.268	0	117	130.973	46.548	0.683	12.375	2383	2.484	0.403	0.868	0.32961
296	CEP89_KAN613-13_3.tif:0007-0728	1.044	87.149	0	602	91.25	52.449	0.756	90.968	17517	1.233	0.811	0.874	2.4229
297	CEP89_KAN613-13_3.tif:0008-0807	0.566	7.982	0	37	175.084	58.169	0.913	4.518	870	1.046	0.956	0.956	0.120336
298	CEP89_KAN613-13_3.tif:0009-0838	0.935	79.85	0	379	150.27	60.454	0.891	74.641	14373	1.15	0.87	0.935	1.98803
299	CEP89_KAN613-13_3.tif:0010-0879	1.018	84.133	0	472	99.869	63.354	0.825	85.635	16490	1.455	0.688	0.912	2.28085
300	CEP89_KAN613-13_3.tif:0011-1037	1.091	101.614	0	490	140.604	74.792	0.924	110.817	21339	1.141	0.876	0.942	2.95155
301	CEP89_KAN613-13_3.tif:0012-1133	1.096	90.033	0	557	159.796	81.608	0.827	98.654	18997	1.122	0.891	0.894	2.62761
302	CEP89_KAN613-13_3.tif:0013-1140	0.722	68.82	0	337	184.028	82.191	0.851	49.678	9566	1.378	0.726	0.949	1.32314
303	CEP89_KAN613-13_3.tif:0014-1228	0.872	43.905	0	263	56.444	88.493	0.851	38.305	7376	1.422	0.703	0.931	1.02023
304	CEP89_KAN613-13_3.tif:0015-1346	0.904	77.046	0	407	78.502	97.005	0.882	69.619	13406	1.378	0.726	0.941	1.85428
305	CEP89_KAN613-13_3.tif:0016-1403	1.08	87.091	0	462	100.743	101.099	0.85	94.074	18115	1.121	0.892	0.908	2.50562
306	CEP89_KAN613-13_3.tif:0017-1602	0.93	57.57	0	319	98.356	115.437	0.802	53.515	10305	1.286	0.778	0.897	1.42536
307	CEP89_KAN613-13_3.tif:0018-1703	1.018	52.439	0	353	116.983	122.666	0.825	53.375	10278	1.282	0.78	0.895	1.42162
308	CEP89_KAN613-13_3.tif:0019-1727	0.956	40.141	0	240	171.503	124.503	0.768	38.357	7386	1.762	0.568	0.889	1.02161
309	CEP89_KAN613-13_3.tif:0020-1935	0.841	86.5	0	427	127.759	139.454	0.9	72.772	14013	1.156	0.865	0.945	1.93824
310	CEP89_KAN613-13_4.tif:0001-0105	0.525	66.861	0	297	137.131	7.617	0.917	35.069	6753	1.516	0.659	0.922	0.934056
311	CEP89_KAN613-13_4.tif:0002-0453	0.421	42.728	0	118	135.95	32.683	0.873	17.973	3461	1.584	0.631	0.936	0.478716
312	CEP89_KAN613-13_4.tif:0003-0525	0.623	33	0	132	144.373	37.881	0.952	20.565	3960	1.267	0.789	0.945	0.547736
313	CEP89_KAN613-13_4.tif:0004-0608	0.462	5.157	0	24	73.495	43.795	0.959	2.384	459	1.053	0.95	0.952	0.0634876
314	CEP89_KAN613-13_4.tif:0005-0664	0.535	6.544	0	31	184.506	47.845	0.978	3.5	674	1.216	0.823	0.954	0.0932258
315	CEP89_KAN613-13_4.tif:0006-0814	1.065	62.093	0	458	115.877	58.691	0.693	66.104	12729	2.305	0.434	0.911	1.76064
316	CEP89_KAN613-13_4.tif:0007-1197	0.888	50.368	0	244	56.281	86.268	0.727	44.729	8613	1.792	0.558	0.875	1.19133
317	CEP89_KAN613-13_4.tif:0008-1368	1.252	75.386	0	548	162.839	98.68	0.84	94.349	18168	1.49	0.671	0.918	2.51295
318	CEP89_KAN613-13_4.tif:0009-1485	0.95	58.279	0	347	65.386	107.048	0.754	55.385	10665	1.523	0.657	0.876	1.47515
319	CEP89_KAN613-13_4.tif:0010-1516	1.013	57.472	0	306	154.79	109.267	0.804	58.2	11207	1.5	0.667	0.892	1.55012
320	CEP89_KAN613-13_4.tif:0011-1554	0.415	38.913	0	174	22.866	111.976	0.939	16.166	3113	1.373	0.729	0.958	0.430581
321	CEP89_KAN613-13_4.tif:0012-1780	0.95	61.967	0	358	154.46	128.315	0.877	58.89	11340	1.488	0.672	0.951	1.56852
322	CEP89_KAN613-13_4.tif:0013-1894	1.049	47.748	0	376	140.278	136.508	0.677	50.088	9645	2.028	0.493	0.838	1.33407
										8263.57				1.14299
323	CEP89_KAN613-14_1.tif:0001-0027	0.452	6.253	0	85	133.76	1.931	0.877	2.825	544	1.586	0.63	0.951	0.0752445
324	CEP89_KAN613-14_1.tif:0002-0378	0.758	42.925	0	258	103.692	27.24	0.784	32.545	6267	1.189	0.841	0.885	0.866834
325	CEP89_KAN613-14_1.tif:0003-0401	0.582	53.5	0	322	138.729	28.961	0.927	31.117	5992	1.122	0.891	0.945	0.828796
326	CEP89_KAN613-14_1.tif:0004-0441	0.436	7.607	0	32	74.906	31.828	0.937	3.318	639	1.253	0.798	0.928	0.0883847
327	CEP89_KAN613-14_1.tif:0005-0759	0.634	73.492	0	392	53.988	54.747	0.713	46.562	8966	1.676	0.597	0.819	1.24015
328	CEP89_KAN613-14_1.tif:0006-1061	0.473	5.165	0	22	76.712	76.509	0.887	2.441	470	1.295	0.772	0.958	0.0650091
329	CEP89_KAN613-14_1.tif:0007-1288	0.774	14.55	0	139	148.175	92.864	0.94	11.259	2168	1.229	0.813	0.943	0.299872
330	CEP89_KAN613-14_1.tif:0008-1296	0.644	6.911	0	37	155.308	93.493	0.779	4.451	857	1.202	0.832	0.892	0.118538
331	CEP89_KAN613-14_1.tif:0009-1301	0.509	4.286	0	32	131.777	93.816	0.913	2.181	420	1.14	0.877	0.956	0.0580932
332	CEP89_KAN613-14_1.tif:0010-1553	0.499	13.208	0	88	84.142	111.926	0.894	6.585	1268	1.357	0.737	0.955	0.175386
333	CEP89_KAN613-14_1.tif:0011-1918	0.566	11.477	0	168	143.157	138.258	0.913	6.497	1251	1.125	0.889	0.952	0.173035
334	CEP89_KAN613-14_1.tif:0012-2062	0.556	5.991	0	44	96.747	148.624	0.801	3.329	641	1.591	0.629	0.881	0.0886613
335	CEP89_KAN613-14_1.tif:0013-2141	0.452	4.632	0	21	50.544	154.24	0.775	2.093	403	1.741	0.574	0.866	0.0557418
336	CEP89_KAN613-14_2.tif:0001-0322	0.571	10.291	0	95	75.64	23.205	0.91	5.879	1132	1.259	0.794	0.94	0.156575
337	CEP89_KAN613-14_2.tif:0002-0426	1.21	34.579	0	344	107.395	30.648	0.761	41.841	8057	1.524	0.656	0.901	1.11442
338	CEP89_KAN613-14_2.tif:0003-0492	0.706	52.912	0	243	67.862	35.485	0.756	37.37	7196	1.503	0.665	0.869	0.99533
339	CEP89_KAN613-14_2.tif:0004-0509	0.592	13.289	0	63	144.082	36.669	0.916	7.868	1515	1.189	0.841	0.938	0.209551
340	CEP89_KAN613-14_2.tif:0005-0707	0.535	19.087	0	74	125.303	50.977	0.918	10.21	1966	1.34	0.746	0.949	0.271932
341	CEP89_KAN613-14_2.tif:0006-0962	0.613	8.415	0	99	110.018	69.388	0.909	5.157	993	1.197	0.835	0.937	0.137349
342	CEP89_KAN613-14_2.tif:0007-0972	0.795	44.092	0	227	174.136	70.086	0.85	35.033	6746	1.21	0.827	0.936	0.933088
343	CEP89_KAN613-14_2.tif:0008-1043	0.561	51.731	0	220	108.523	75.156	0.828	29.014	5587	1.771	0.565	0.982	0.772778
344	CEP89_KAN613-14_2.tif:0009-1086	1.241	86.795	0	508	136.081	78.259	0.867	107.727	20744	1.556	0.643	0.926	2.86925
345	CEP89_KAN613-14_2.tif:0010-1344	1.054	38.187	0	252	117.478	96.854	0.65	40.257	7752	1.35	0.741	0.819	1.07223
346	CEP89_KAN613-14_2.tif:0011-1381	0.488	42.309	0	144	34.043	99.537	0.934	20.653	3977	1.218	0.821	0.949	0.550087
347	CEP89_KAN613-14_2.tif:0012-1422	0.525	32.584	0	193	79.278	102.542	0.821	17.091	3291	1.419	0.705	0.931	0.455202
348	CEP89_KAN613-14_2.tif:0013-1499	0.888	78.018	0	458	161.216	108.061	0.819	69.282	13341	1.427	0.701	0.898	1.84529
349	CEP89_KAN613-14_2.tif:0014-1665	0.462	284.506	0	1795	101.505	119.989	0.909	131.496	25321	1.115	0.897	0.994	3.50233
350	CEP89_KAN613-14_2.tif:0015-1676	0.883	21.518	0	186	144.364	120.764	0.882	18.997	3658	1.364	0.733	0.937	0.505964
351	CEP89_KAN613-14_2.tif:0016-1875	0.488	7.479	0	37	179.485	135.141	0.966	3.651	703	1.101	0.908	0.945	0.097237
352	CEP89_KAN613-14_2.tif:0017-1892	0.888	67.222	0	325	86.87	136.382	0.887	59.695	11495	1.196	0.836	0.929	1.58996
353	CEP89_KAN613-14_2.tif:0018-1951	0.872	46.167	0	241	155.173	140.665	0.805	40.278	7756	1.115	0.897	0.877	1.07279
354	CEP89_KAN613-14_2.tif:0019-1971	0.737	32.472	0	162	122.759	142.046	0.956	23.946	4611	1.089	0.918	0.944	0.63778
355	CEP89_KAN613-14_3.tif:0001-0128	0.426	8.098	0	96	71.515	9.214	0.928	3.448	664	1.141	0.877	0.953	0.0918426
356	CEP89_KAN613-14_3.tif:0002-0264	0.576	39.964	0	166	63.677	19.041	0.831	23.037	4436	1.311	0.763	0.892	0.613575
357	CEP89_KAN613-14_3.tif:0003-0443	0.867	44.144	0	279	101.254	31.962	0.808	38.284	7372	1.751	0.571	0.928	1.01967
358	CEP89_KAN613-14_3.tif:0004-0665	0.457	4.886	0	34	131.513	47.935	0.949	2.233	430	1.23	0.813	0.946	0.0594764
359	CEP89_KAN613-14_3.tif:0005-0739	0.956	32.277	0	194	127.64	53.276	0.652	30.842	5939	2.38	0.42	0.885	0.821466
360	CEP89_KAN613-14_3.tif:0006-0907	0.457	24.216	0	69	80.188	65.357	0.982	11.067	2131	1.087	0.92	0.957	0.294754
361	CEP89_KAN613-14_3.tif:0007-1067	0.649	104.624	0	338	113.088	76.898	0.884	67.916	13078	1.305	0.766	0.951	1.80891
362	CEP89_KAN613-14_3.tif:0008-1192	0.722	58.237	0	307	151.112	85.925	0.887	42.039	8095	1.343	0.745	0.942	1.11968
363	CEP89_KAN613-14_3.tif:0009-1233	0.54	46.596	0	230	109.453	88.901	0.956	25.166	4846	1.01	0.991	0.945	0.670285
364	CEP89_KAN613-14_3.tif:0010-1266	0.602	72.534	0	326	144.306	91.249	0.879	43.695	8414	1.369	0.73	0.951	1.1638
365	CEP89_KAN613-14_3.tif:0011-1284	0.462	34.787	0	238	67.718	92.488	0.746	16.078	3096	1.287	0.777	0.856	0.42823
366	CEP89_KAN613-14_3.tif:0012-1528	0.462	18.843	0	118	165.645	110.138	0.959	8.709	1677	1.244	0.804	0.952	0.231958
367	CEP89_KAN613-14_3.tif:0013-1529	0.493	12.8	0	45	117.798	110.233	0.944	6.315	1216	1.176	0.85	0.945	0.168194
368	CEP89_KAN613-14_3.tif:0014-1626	0.587	29.699	0	127	170.582	117.188	0.919	17.428	3356	1.233	0.811	0.974	0.464192
369	CEP89_KAN613-14_3.tif:0015-1736	0.628	28.289	0	96	100.879	125.088	0.87	17.776	3423	1.515	0.66	0.913	0.47346
370	CEP89_KAN613-14_3.tif:0016-1796	0.878	34.586	0	220	58.958	129.516	0.75	30.354	5845	1.592	0.628	0.871	0.808464
371	CEP89_KAN613-14_3.tif:0017-1920	0.602	19.595	0	105	125.53	138.374	0.96	11.804	2273	1.08	0.926	0.943	0.314395
372	CEP89_KAN613-14_3.tif:0018-2141	0.628	10.074	0	146	116.766	154.31	0.823	6.33	1219	1.358	0.736	0.89	0.168609
373	CEP89_KAN613-14_4.tif:0001-0344	0.722	35.309	0	186	132.972	24.799	0.911	25.488	4908	1.211	0.826	0.933	0.678861
374	CEP89_KAN613-14_4.tif:0002-0467	0.67	9.171	0	87	157.49	33.734	0.854	6.143	1183	1.426	0.701	0.928	0.163629
375	CEP89_KAN613-14_4.tif:0003-0555	0.867	55	0	270	115.2	40.025	0.866	47.699	9185	1.095	0.913	0.908	1.27044
376	CEP89_KAN613-14_4.tif:0004-0845	0.654	8.508	0	101	146.171	60.888	0.917	5.567	1072	1.401	0.714	0.969	0.148276
377	CEP89_KAN613-14_4.tif:0005-0890	0.608	57.838	0	245	129.615	64.171	0.818	35.142	6767	1.164	0.859	0.88	0.935992
378	CEP89_KAN613-14_4.tif:0006-0953	0.483	6.161	0	45	187.971	68.685	0.924	2.976	573	1.327	0.754	0.925	0.0792557
379	CEP89_KAN613-14_4.tif:0007-1222	0.576	17.054	0	96	122.347	88.058	0.93	9.831	1893	1.187	0.843	0.969	0.261834
380	CEP89_KAN613-14_4.tif:0008-1224	0.982	90.481	0	487	151.208	88.201	0.813	88.808	17101	1.628	0.614	0.909	2.36536
381	CEP89_KAN613-14_4.tif:0009-1394	0.462	5.876	0	21	191.959	100.508	0.927	2.716	523	1.295	0.772	0.957	0.0723399
382	CEP89_KAN613-14_4.tif:0010-1400	1.241	52.079	0	373	106.15	100.923	0.795	64.639	12447	1.665	0.601	0.9	1.72163
383	CEP89_KAN613-14_4.tif:0011-1424	0.706	64.515	0	360	76.381	102.565	0.868	45.565	8774	1.203	0.831	0.913	1.21359
384	CEP89_KAN613-14_4.tif:0012-1532	0.582	11.375	0	59	175.09	110.35	0.722	6.616	1274	1.296	0.771	0.839	0.176216
385	CEP89_KAN613-14_4.tif:0013-1572	0.499	12.573	0	51	183.654	113.28	0.986	6.268	1207	1.071	0.933	0.95	0.166949
386	CEP89_KAN613-14_4.tif:0014-1731	0.685	35.22	0	177	107.4	124.785	0.752	24.143	4649	1.18	0.848	0.863	0.643037
387	CEP89_KAN613-14_4.tif:0015-1894	0.67	9.062	0	37	146.467	136.478	0.902	6.071	1169	1.205	0.83	0.931	0.161693
										4860.95				0.672353
388	CEP89_KAN613-15_1.tif:0001-0080	1.033	48.261	0	339	100.741	5.828	0.719	49.875	9604	1.533	0.652	0.896	1.3284
389	CEP89_KAN613-15_1.tif:0002-0333	0.623	11.258	0	71	113.683	23.98	0.936	7.016	1351	1.075	0.93	0.96	0.186866
390	CEP89_KAN613-15_1.tif:0003-0505	1.122	47.542	0	234	78.043	36.411	0.857	53.328	10269	1.406	0.711	0.908	1.42038
391	CEP89_KAN613-15_1.tif:0004-0621	0.872	49.446	0	306	176.697	44.726	0.813	43.139	8307	1.515	0.66	0.923	1.149
392	CEP89_KAN613-15_1.tif:0005-0644	0.592	4.614	0	32	184.503	46.444	0.853	2.732	526	1.455	0.687	0.912	0.0727548
393	CEP89_KAN613-15_1.tif:0006-0772	1.007	55.392	0	284	186.556	55.658	0.767	55.806	10746	2.093	0.478	0.933	1.48636
394	CEP89_KAN613-15_1.tif:0007-0932	0.685	7.356	0	48	128.414	67.164	0.949	5.043	971	1.109	0.902	0.943	0.134306
395	CEP89_KAN613-15_1.tif:0008-0953	1.283	73.437	0	423	161.598	68.636	0.682	94.198	18139	1.77	0.565	0.855	2.50894
396	CEP89_KAN613-15_1.tif:0009-0983	0.665	9.742	0	52	105.716	70.849	0.816	6.476	1247	1.647	0.607	0.901	0.172482
397	CEP89_KAN613-15_1.tif:0010-1099	0.493	172.6	0	781	24.642	79.2	0.957	85.152	16397	1.023	0.978	0.974	2.26799
398	CEP89_KAN613-15_1.tif:0011-1127	1.174	64.765	0	589	78.901	81.293	0.794	76.012	14637	1.571	0.636	0.924	2.02455
399	CEP89_KAN613-15_1.tif:0012-1138	1.272	63.033	0	403	113.824	82.03	0.765	80.198	15443	1.661	0.602	0.888	2.13603
400	CEP89_KAN613-15_1.tif:0013-1463	0.665	62.133	0	299	78.973	105.5	0.871	41.301	7953	1.219	0.821	0.921	1.10004
401	CEP89_KAN613-15_1.tif:0014-1476	0.779	21.36	0	145	136.834	106.378	0.825	16.639	3204	1.381	0.724	0.898	0.443168
402	CEP89_KAN613-15_1.tif:0015-1620	0.867	6.737	0	40	164.955	116.744	0.846	5.842	1125	1.704	0.587	0.938	0.155607
403	CEP89_KAN613-15_1.tif:0016-1969	0.727	73.979	0	360	133.377	141.961	0.751	53.785	10357	1.692	0.591	0.867	1.43255
404	CEP89_KAN613-15_2.tif:0001-0159	0.67	13.411	0	64	65.201	11.469	0.928	8.984	1730	1.245	0.803	0.942	0.239289
405	CEP89_KAN613-15_2.tif:0002-0303	1.2	61.277	0	418	124.252	21.832	0.777	73.509	14155	1.626	0.615	0.888	1.95788
406	CEP89_KAN613-15_2.tif:0003-0420	0.436	5.357	0	23	59.952	30.307	0.863	2.337	450	1.513	0.661	0.884	0.0622427
407	CEP89_KAN613-15_2.tif:0004-0486	0.608	5.368	0	32	135.909	35.061	0.968	3.261	628	1.295	0.772	0.963	0.0868632
408	CEP89_KAN613-15_2.tif:0005-0713	1.039	63.655	0	440	54.857	51.421	0.8	66.114	12731	1.131	0.884	0.883	1.76092
409	CEP89_KAN613-15_2.tif:0006-0766	0.566	7.596	0	37	36.178	55.243	0.989	4.3	828	1.153	0.867	0.936	0.114527
410	CEP89_KAN613-15_2.tif:0007-0852	1.2	43.537	0	382	137.986	61.433	0.79	52.227	10057	1.563	0.64	0.911	1.39106
411	CEP89_KAN613-15_2.tif:0008-1041	1.407	61.55	0	580	162.752	75.032	0.741	86.622	16680	1.448	0.691	0.878	2.30713
412	CEP89_KAN613-15_2.tif:0009-1178	0.935	54.9	0	350	91.678	84.909	0.775	51.319	9882	1.728	0.579	0.887	1.36685
413	CEP89_KAN613-15_2.tif:0010-1333	1.376	61.555	0	408	174.14	96.004	0.827	84.711	16312	1.354	0.739	0.915	2.25623
414	CEP89_KAN613-15_2.tif:0011-1384	1.272	88.735	0	522	143.173	99.779	0.888	112.899	21740	1.515	0.66	0.942	3.00702
415	CEP89_KAN613-15_2.tif:0012-1518	0.8	49.844	0	246	30.888	109.356	0.847	39.863	7676	1.262	0.792	0.917	1.06172
416	CEP89_KAN613-15_2.tif:0013-1916	0.597	7.191	0	28	86.032	138.103	0.952	4.295	827	1.145	0.873	0.947	0.114388
417	CEP89_KAN613-15_2.tif:0014-2065	0.748	6.819	0	69	158.907	148.792	0.8	5.1	982	1.726	0.579	0.917	0.135827
418	CEP89_KAN613-15_2.tif:0015-2177	0.654	11.468	0	84	53.342	156.943	0.871	7.504	1445	1.661	0.602	0.92	0.199868
419	CEP89_KAN613-15_3.tif:0001-0120	0.462	16.742	0	104	64.133	8.642	0.885	7.738	1490	1.138	0.878	0.913	0.206093
420	CEP89_KAN613-15_3.tif:0002-0144	0.846	62.423	0	258	47.981	10.407	0.875	52.84	10175	1.166	0.858	0.931	1.40738
421	CEP89_KAN613-15_3.tif:0003-0273	0.758	14.178	0	79	129.37	19.711	0.875	10.75	2070	1.34	0.746	0.936	0.286317
422	CEP89_KAN613-15_3.tif:0004-0345	0.753	21.345	0	112	65.414	24.86	0.925	16.073	3095	1.195	0.837	0.948	0.428092
423	CEP89_KAN613-15_3.tif:0005-0476	0.55	147	0	419	75.949	34.333	0.899	80.92	15582	1.145	0.873	0.981	2.15526
424	CEP89_KAN613-15_3.tif:0006-0497	1.132	28.106	0	182	139.442	35.901	0.693	31.818	6127	1.899	0.526	0.869	0.847469
425	CEP89_KAN613-15_3.tif:0007-0518	0.769	49.493	0	237	58.454	37.353	0.91	38.04	7325	1.44	0.695	0.949	1.01317
426	CEP89_KAN613-15_3.tif:0008-0536	1.044	95.706	0	624	106.059	38.681	0.892	99.901	19237	1.131	0.884	0.933	2.66081
427	CEP89_KAN613-15_3.tif:0009-0668	0.623	82.483	0	274	19.782	48.162	0.734	51.402	9898	1.666	0.6	0.899	1.36906
428	CEP89_KAN613-15_3.tif:0010-0681	1.044	36.846	0	175	70.931	49.025	0.904	38.46	7406	1.078	0.928	0.931	1.02438
429	CEP89_KAN613-15_3.tif:0011-0788	0.945	50.126	0	260	58.074	56.784	0.773	47.377	9123	1.388	0.721	0.886	1.26187
430	CEP89_KAN613-15_3.tif:0012-0825	0.68	68.42	0	303	166.761	59.506	0.802	46.546	8963	1.64	0.61	0.936	1.23974
431	CEP89_KAN613-15_3.tif:0013-1099	0.857	40.588	0	203	96.071	79.207	0.93	34.779	6697	1.254	0.797	0.948	0.92631
432	CEP89_KAN613-15_3.tif:0014-1340	0.795	73.621	0	355	34.895	96.653	0.917	58.496	11264	1.076	0.93	0.959	1.558
433	CEP89_KAN613-15_3.tif:0015-1343	0.743	32.51	0	155	178.52	96.865	0.815	24.143	4649	1.332	0.751	0.908	0.643037
434	CEP89_KAN613-15_3.tif:0016-1516	0.826	23.648	0	96	28.609	109.248	0.896	19.526	3760	1.543	0.648	0.935	0.520073
435	CEP89_KAN613-15_3.tif:0017-1632	0.867	33.497	0	211	106.881	117.578	0.896	29.05	5594	1.101	0.908	0.938	0.773746
436	CEP89_KAN613-15_3.tif:0018-1710	0.956	101.359	0	579	153.523	123.285	0.809	96.852	18650	1.618	0.618	0.893	2.57962
437	CEP89_KAN613-15_3.tif:0019-1770	0.66	25.008	0	95	24.081	127.525	0.913	16.493	3176	1.463	0.683	0.937	0.439295
438	CEP89_KAN613-15_3.tif:0020-1852	1.22	42.391	0	331	137.701	133.507	0.791	51.734	9962	1.759	0.569	0.895	1.37792
439	CEP89_KAN613-15_3.tif:0021-1909	1.096	77.455	0	503	77.495	137.592	0.908	84.872	16343	1.154	0.867	0.938	2.26052
440	CEP89_KAN613-15_3.tif:0022-2032	0.685	19.492	0	169	177.283	146.503	0.76	13.362	2573	1.405	0.712	0.904	0.35589
441	CEP89_KAN613-15_4.tif:0001-0036	0.68	17.366	0	134	87.615	2.621	0.969	11.814	2275	1.156	0.865	0.946	0.314672
442	CEP89_KAN613-15_4.tif:0002-0103	0.821	58.671	0	375	132.138	7.408	0.764	48.14	9270	1.586	0.631	0.878	1.2822
443	CEP89_KAN613-15_4.tif:0003-0429	0.826	24.094	0	118	43.335	30.896	0.825	19.895	3831	1.201	0.833	0.893	0.529893
444	CEP89_KAN613-15_4.tif:0004-0466	0.992	89.869	0	452	77.171	33.588	0.815	89.14	17165	1.71	0.585	0.903	2.37421
445	CEP89_KAN613-15_4.tif:0005-0472	0.592	347.158	0	2546	86.837	34.007	0.927	205.524	39576	1.221	0.819	0.979	5.47404
446	CEP89_KAN613-15_4.tif:0006-0503	0.753	16.862	0	174	173.594	36.258	0.95	12.697	2445	1.138	0.878	0.945	0.338185
447	CEP89_KAN613-15_4.tif:0007-0666	1.127	70.382	0	450	92.383	47.954	0.858	79.315	15273	1.318	0.759	0.952	2.11252
448	CEP89_KAN613-15_4.tif:0008-0787	0.478	14.413	0	58	52.917	56.719	0.897	6.886	1326	1.049	0.954	0.963	0.183409
449	CEP89_KAN613-15_4.tif:0009-0812	0.971	44.802	0	258	36.947	58.543	0.703	43.508	8378	1.823	0.548	0.862	1.15882
450	CEP89_KAN613-15_4.tif:0010-0940	0.971	18.193	0	111	118.136	67.783	0.868	17.667	3402	1.345	0.743	0.917	0.470555
451	CEP89_KAN613-15_4.tif:0011-0973	0.561	10.537	0	68	136.649	70.146	0.933	5.91	1138	1.064	0.94	0.952	0.157405
452	CEP89_KAN613-15_4.tif:0012-1012	0.732	29.667	0	115	54.194	72.958	0.96	21.723	4183	1.168	0.856	0.962	0.578581
453	CEP89_KAN613-15_4.tif:0013-1165	1.226	15.381	0	162	128.187	83.952	0.737	18.851	3630	1.792	0.558	0.892	0.502091
454	CEP89_KAN613-15_4.tif:0014-1185	0.748	8.472	0	38	47.252	85.402	0.969	6.336	1220	1.268	0.788	0.954	0.168747
455	CEP89_KAN613-15_4.tif:0015-1347	0.852	20.085	0	107	59.74	97.059	0.925	17.106	3294	1.109	0.901	0.934	0.455617
456	CEP89_KAN613-15_4.tif:0016-1456	0.421	12.123	0	52	46.722	104.956	0.886	5.1	982	1.167	0.857	0.953	0.135827
457	CEP89_KAN613-15_4.tif:0017-1766	0.763	37.449	0	189	84.854	127.259	0.928	28.588	5505	1.329	0.752	0.939	0.761436
458	CEP89_KAN613-15_4.tif:0018-2012	0.431	4.169	0	24	167.266	145.038	0.94	1.797	346	1.139	0.878	0.96	0.0478577
										7785.87				1.07692
459	CEP89_KAN613-16_1.tif:0001-0077	0.493	19.463	0	122	45.523	5.552	0.846	9.602	1849	1.219	0.82	0.892	0.255748
460	CEP89_KAN613-16_1.tif:0002-0199	0.535	25.097	0	231	167.971	14.34	0.947	13.424	2585	1.284	0.779	0.949	0.35755
461	CEP89_KAN613-16_1.tif:0003-0201	0.841	46.364	0	245	131.769	14.458	0.927	39.006	7511	1.104	0.906	0.918	1.0389
462	CEP89_KAN613-16_1.tif:0004-0202	0.67	226.93	0	1248	136.034	14.555	0.966	152.024	29274	1.02	0.98	0.963	4.0491
463	CEP89_KAN613-16_1.tif:0005-0320	0.711	50.314	0	276	49.498	23.102	0.8	35.796	6893	1.855	0.539	0.919	0.95342
464	CEP89_KAN613-16_1.tif:0006-0350	1.085	64.239	0	358	84.894	25.167	0.899	69.723	13426	1.165	0.858	0.95	1.85705
465	CEP89_KAN613-16_1.tif:0007-0361	0.535	46.786	0	279	169.99	26.053	0.89	25.026	4819	1.175	0.851	0.945	0.66655
466	CEP89_KAN613-16_1.tif:0008-0571	0.696	125.224	0	637	134.694	41.111	0.912	87.141	16780	1.307	0.765	0.944	2.32096
467	CEP89_KAN613-16_1.tif:0009-0661	0.732	19.404	0	106	186.661	47.612	0.803	14.208	2736	1.543	0.648	0.907	0.378436
468	CEP89_KAN613-16_1.tif:0010-0662	0.493	14.505	0	76	48.814	47.703	0.914	7.156	1378	1.449	0.69	0.945	0.190601
469	CEP89_KAN613-16_1.tif:0011-0672	0.639	23.081	0	194	157.985	48.439	0.921	14.743	2839	1.27	0.787	0.939	0.392682
470	CEP89_KAN613-16_1.tif:0012-0865	0.706	255.243	0	1709	119.36	62.328	0.951	180.27	34713	1.126	0.888	0.951	4.8014
471	CEP89_KAN613-16_1.tif:0013-0898	0.997	35.99	0	257	148.452	64.651	0.798	35.885	6910	1.235	0.81	0.925	0.955772
472	CEP89_KAN613-16_1.tif:0014-1048	0.519	75.61	0	294	86.946	75.524	0.994	39.265	7561	1.163	0.86	0.962	1.04582
473	CEP89_KAN613-16_1.tif:0015-1141	0.504	17.278	0	93	72.234	82.229	0.933	8.704	1676	1.092	0.916	0.946	0.23182
474	CEP89_KAN613-16_1.tif:0016-1174	0.727	43.143	0	146	167.694	84.632	0.87	31.367	6040	1.296	0.771	0.943	0.835436
475	CEP89_KAN613-16_1.tif:0017-1443	1.189	64.943	0	504	156.31	104.049	0.768	77.232	14872	1.408	0.71	0.874	2.05705
476	CEP89_KAN613-16_1.tif:0018-1478	0.675	47.162	0	240	94.352	106.516	0.92	31.839	6131	1.024	0.977	0.956	0.848023
477	CEP89_KAN613-16_1.tif:0019-1477	0.478	45.391	0	210	29.141	106.431	0.771	21.687	4176	1.909	0.524	0.902	0.577612
478	CEP89_KAN613-16_1.tif:0020-1592	0.815	22.013	0	159	121.835	114.738	0.864	17.948	3456	1.437	0.696	0.937	0.478024
479	CEP89_KAN613-16_1.tif:0021-1608	0.717	63.145	0	290	61.032	115.912	0.89	45.253	8714	1.189	0.841	0.945	1.2053
480	CEP89_KAN613-16_1.tif:0022-1693	0.493	11.358	0	86	34.047	122.014	0.873	5.603	1079	1.546	0.647	0.905	0.149244
481	CEP89_KAN613-16_1.tif:0023-1765	1.184	67.974	0	531	170.391	127.224	0.795	80.483	15498	1.634	0.612	0.892	2.14364
482	CEP89_KAN613-16_1.tif:0024-1893	0.504	12.351	0	58	135.096	136.409	0.933	6.221	1198	1.354	0.739	0.956	0.165704
483	CEP89_KAN613-16_1.tif:0025-2028	0.514	22.273	0	73	152.238	146.184	0.91	11.451	2205	1.525	0.656	0.93	0.304989
484	CEP89_KAN613-16_2.tif:0001-0125	0.426	9.451	0	39	47.009	9.001	0.962	4.025	775	1.131	0.884	0.965	0.107196
485	CEP89_KAN613-16_2.tif:0002-0131	0.53	41.02	0	221	142.069	9.464	0.938	21.728	4184	1.203	0.831	0.936	0.578719
486	CEP89_KAN613-16_2.tif:0003-0132	0.53	16.706	0	73	122.863	9.51	0.938	8.849	1704	1.235	0.81	0.932	0.235692
487	CEP89_KAN613-16_2.tif:0004-0156	0.441	9.094	0	55	160.623	11.23	0.886	4.014	773	1.23	0.813	0.934	0.106919
488	CEP89_KAN613-16_2.tif:0005-0538	0.535	79.214	0	252	134.696	38.817	0.96	42.371	8159	1.101	0.909	0.972	1.12853
489	CEP89_KAN613-16_2.tif:0006-0541	0.867	69.246	0	372	106.854	39.003	0.808	60.054	11564	1.714	0.584	0.923	1.5995
490	CEP89_KAN613-16_2.tif:0007-0648	0.556	104.019	0	381	63.8	46.749	0.885	57.8	11130	1.494	0.669	0.939	1.53947
491	CEP89_KAN613-16_2.tif:0008-0659	0.483	8.032	0	47	168.686	47.469	0.937	3.879	747	1.106	0.904	0.979	0.103323
492	CEP89_KAN613-16_2.tif:0009-0748	0.732	50.816	0	258	154.662	53.92	0.845	37.209	7165	1.519	0.658	0.916	0.991043
493	CEP89_KAN613-16_2.tif:0010-0844	0.504	7.412	0	39	187.2	60.845	0.933	3.734	719	1.131	0.884	0.946	0.09945
494	CEP89_KAN613-16_2.tif:0011-1042	1.148	49.864	0	299	131.527	75.071	0.805	57.228	11020	1.711	0.584	0.963	1.52426
495	CEP89_KAN613-16_2.tif:0012-1122	0.831	84.713	0	439	67.565	80.895	0.871	70.388	13554	1.3	0.77	0.922	1.87475
496	CEP89_KAN613-16_2.tif:0013-1150	0.649	28.296	0	199	89.504	82.876	0.884	18.368	3537	1.12	0.893	0.94	0.489228
497	CEP89_KAN613-16_2.tif:0014-1169	0.867	44.898	0	242	163.051	84.279	0.866	38.938	7498	1.327	0.754	0.923	1.0371
498	CEP89_KAN613-16_2.tif:0015-1397	0.826	76.057	0	392	129.004	100.704	0.896	62.801	12093	1.075	0.93	0.927	1.67267
499	CEP89_KAN613-16_2.tif:0016-1411	1.35	42.642	0	332	157.513	101.564	0.723	57.576	11087	1.516	0.659	0.877	1.53352
500	CEP89_KAN613-16_2.tif:0017-1514	0.831	32.719	0	211	80.139	109.103	0.889	27.186	5235	1.262	0.792	0.955	0.72409
501	CEP89_KAN613-16_2.tif:0018-1524	0.53	57	0	271	53.474	109.871	0.926	30.193	5814	1.451	0.689	0.919	0.804176
502	CEP89_KAN613-16_2.tif:0019-1618	0.675	29.346	0	180	28.861	116.592	0.852	19.812	3815	1.292	0.774	0.897	0.52768
503	CEP89_KAN613-16_2.tif:0020-1638	0.737	24.197	0	131	115.285	118.065	0.882	17.844	3436	1.43	0.699	0.934	0.475258
504	CEP89_KAN613-16_2.tif:0021-1734	0.717	28.174	0	229	111.46	124.936	0.939	20.191	3888	1.072	0.933	0.955	0.537777
505	CEP89_KAN613-16_2.tif:0022-1844	0.576	22.883	0	116	66.586	132.923	0.947	13.191	2540	1.098	0.911	0.937	0.351326
506	CEP89_KAN613-16_2.tif:0023-1979	0.509	45.122	0	166	103.424	142.607	0.913	22.964	4422	1.3	0.769	0.961	0.611639
507	CEP89_KAN613-16_3.tif:0001-0113	0.685	22.28	0	143	53.398	8.149	0.888	15.273	2941	1.527	0.655	0.926	0.406791
508	CEP89_KAN613-16_3.tif:0002-0174	0.566	70.193	0	273	136.166	12.577	0.913	39.733	7651	1.243	0.804	0.952	1.05826
509	CEP89_KAN613-16_3.tif:0003-0428	0.81	70.699	0	497	117.748	30.837	0.945	57.275	11029	1.154	0.866	0.969	1.5255
510	CEP89_KAN613-16_3.tif:0004-0441	0.571	155.064	0	555	150.891	31.773	0.868	88.58	17057	1.249	0.8	0.957	2.35928
511	CEP89_KAN613-16_3.tif:0005-0516	0.55	91.406	0	336	84.418	37.144	0.827	50.316	9689	1.634	0.612	0.93	1.34016
512	CEP89_KAN613-16_3.tif:0006-0699	0.634	16.443	0	134	147.608	50.418	0.888	10.417	2006	1.267	0.789	0.938	0.277464
513	CEP89_KAN613-16_3.tif:0007-0754	0.805	46.723	0	308	167.824	54.354	0.726	37.609	7242	1.528	0.655	0.838	1.00169
514	CEP89_KAN613-16_3.tif:0008-0796	0.758	35.89	0	166	117.47	57.41	0.875	27.212	5240	1.257	0.796	0.924	0.724782
515	CEP89_KAN613-16_3.tif:0009-0824	1.184	60.118	0	365	90.318	59.382	0.773	71.182	13707	1.841	0.543	0.903	1.89591
516	CEP89_KAN613-16_3.tif:0010-0991	0.441	15.871	0	77	189.264	71.465	0.886	7.006	1349	1.423	0.703	0.934	0.18659
517	CEP89_KAN613-16_3.tif:0011-1165	0.961	50.016	0	264	165.594	83.943	0.803	48.052	9253	1.786	0.56	0.918	1.27985
518	CEP89_KAN613-16_3.tif:0012-1200	0.971	64	0	360	91.32	86.461	0.848	62.152	11968	1.091	0.917	0.912	1.65538
519	CEP89_KAN613-16_3.tif:0013-1249	0.987	64.911	0	430	147.52	90.089	0.8	64.047	12333	1.512	0.661	0.89	1.70587
520	CEP89_KAN613-16_3.tif:0014-1482	0.462	11.517	0	133	38.877	106.801	0.856	5.323	1025	1.587	0.63	0.918	0.141775
521	CEP89_KAN613-16_3.tif:0015-1635	0.628	55.727	0	175	109.919	117.829	0.906	35.017	6743	1.423	0.703	0.949	0.932673
522	CEP89_KAN613-16_3.tif:0016-1714	0.961	48.87	0	286	130.186	123.569	0.71	46.951	9041	1.823	0.549	0.847	1.25053
523	CEP89_KAN613-16_3.tif:0017-1742	0.499	4.344	0	37	61.093	125.524	0.911	2.166	417	1.492	0.67	0.928	0.0576783
524	CEP89_KAN613-16_3.tif:0018-1891	0.545	16.143	0	114	160.912	136.246	0.896	8.802	1695	1.345	0.743	0.917	0.234448
525	CEP89_KAN613-16_4.tif:0001-0170	0.55	16.981	0	139	63.99	12.243	0.877	9.348	1800	1.16	0.862	0.902	0.248971
526	CEP89_KAN613-16_4.tif:0002-0396	0.613	43.695	0	221	137.655	28.597	0.859	26.776	5156	1.179	0.848	0.929	0.713163
527	CEP89_KAN613-16_4.tif:0003-0857	0.717	33.42	0	174	160.481	61.789	0.965	23.951	4612	1.103	0.906	0.958	0.637919
528	CEP89_KAN613-16_4.tif:0004-0887	0.805	16.555	0	195	147.418	63.907	0.874	13.326	2566	1.189	0.841	0.923	0.354922
529	CEP89_KAN613-16_4.tif:0005-0969	0.675	42.7	0	195	114.1	69.838	0.909	28.827	5551	1.27	0.788	0.939	0.767799
530	CEP89_KAN613-16_4.tif:0006-0976	1.662	27.562	0	119	153.556	70.254	0.736	45.804	8820	1.082	0.924	0.857	1.21996
531	CEP89_KAN613-16_4.tif:0007-1108	0.722	64.82	0	294	185.396	79.805	0.854	46.79	9010	1.193	0.838	0.888	1.24624
532	CEP89_KAN613-16_4.tif:0008-1214	0.623	60.833	0	281	190.085	87.507	0.826	37.91	7300	1.569	0.637	0.923	1.00972
533	CEP89_KAN613-16_4.tif:0009-1332	0.872	85.81	0	455	139.807	95.972	0.736	74.864	14416	1.451	0.689	0.862	1.99398
534	CEP89_KAN613-16_4.tif:0010-1396	0.898	42.815	0	216	69.772	100.625	0.719	38.466	7407	2.027	0.493	0.908	1.02452
535	CEP89_KAN613-16_4.tif:0011-1395	0.514	33.071	0	148	40.251	100.588	0.819	17.002	3274	1.371	0.729	0.88	0.45285
536	CEP89_KAN613-16_4.tif:0012-1539	0.763	51.803	0	261	167.482	110.954	0.868	39.546	7615	1.14	0.877	0.945	1.05329
537	CEP89_KAN613-16_4.tif:0013-1617	0.441	12.871	0	54	32.11	116.502	0.983	5.681	1094	1.181	0.847	0.944	0.151319
538	CEP89_KAN613-16_4.tif:0014-1767	0.831	78.037	0	342	145.61	127.378	0.88	64.842	12486	1.24	0.806	0.925	1.72703
539	CEP89_KAN613-16_4.tif:0015-1823	0.452	43.368	0	226	59.53	131.39	0.877	19.594	3773	1.554	0.644	0.956	0.521871
540	CEP89_KAN613-16_4.tif:0016-1899	0.966	39.194	0	276	80.983	136.894	0.76	37.858	7290	1.408	0.71	0.855	1.00833
541	CEP89_KAN613-16_5.tif:0001-0037	0.467	11.2	0	45	129.332	2.657	0.925	5.235	1008	1.527	0.655	0.952	0.139424
542	CEP89_KAN613-16_5.tif:0002-0072	1.309	66.798	0	551	100.613	5.203	0.772	87.416	16833	1.583	0.632	0.886	2.32829
543	CEP89_KAN613-16_5.tif:0003-0098	0.54	63.74	0	290	120.092	7.089	0.821	34.425	6629	1.573	0.636	0.941	0.916905
544	CEP89_KAN613-16_5.tif:0004-0183	0.743	53.867	0	234	62.095	13.238	0.795	40.003	7703	1.143	0.875	0.902	1.06546
545	CEP89_KAN613-16_5.tif:0005-0605	0.784	52.371	0	415	120.79	43.586	0.704	41.067	7908	2.569	0.389	0.971	1.09381
546	CEP89_KAN613-16_5.tif:0006-0647	0.846	55.975	0	298	163.096	46.609	0.807	47.382	9124	1.276	0.784	0.893	1.26201
547	CEP89_KAN613-16_5.tif:0007-0730	0.94	58.552	0	298	185.156	52.685	0.746	55.037	10598	1.029	0.972	0.86	1.46589
548	CEP89_KAN613-16_5.tif:0008-0728	0.415	189.662	0	925	159.797	52.502	0.919	78.796	15173	1.031	0.97	0.994	2.09869
549	CEP89_KAN613-16_5.tif:0009-0751	0.763	36.374	0	191	112.083	54.077	0.85	27.768	5347	1.484	0.674	0.902	0.739582
550	CEP89_KAN613-16_5.tif:0010-0884	0.935	48.178	0	371	52.975	63.743	0.711	45.035	8672	1.791	0.558	0.855	1.19949
551	CEP89_KAN613-16_5.tif:0011-0936	0.53	23.961	0	100	23.651	67.476	0.751	12.692	2444	1.473	0.679	0.879	0.338047
552	CEP89_KAN613-16_5.tif:0012-1094	0.769	33.689	0	163	163.942	78.833	0.794	25.893	4986	1.987	0.503	0.946	0.689649
553	CEP89_KAN613-16_5.tif:0013-1353	0.535	21.359	0	107	190.317	97.535	0.96	11.425	2200	1.114	0.898	0.972	0.304298
554	CEP89_KAN613-16_5.tif:0014-1430	0.821	77.316	0	379	109.803	103.107	0.848	63.439	12216	1.619	0.618	0.935	1.68968
555	CEP89_KAN613-16_5.tif:0015-1520	1.028	45.283	0	268	125.374	109.513	0.86	46.562	8966	1.201	0.832	0.93	1.24015
556	CEP89_KAN613-16_5.tif:0016-1603	1.252	56.133	0	382	156.105	115.479	0.758	70.253	13528	1.742	0.574	0.891	1.87115
557	CEP89_KAN613-16_5.tif:0017-1775	0.789	35.092	0	231	47.132	127.93	0.848	27.7	5334	1.154	0.866	0.876	0.737784
558	CEP89_KAN613-16_5.tif:0018-1853	1.303	81.414	0	640	67.721	133.561	0.688	106.122	20435	2.093	0.478	0.869	2.82651
559	CEP89_KAN613-16_5.tif:0019-1979	0.696	19.448	0	87	140.61	142.623	0.937	13.533	2606	1.316	0.76	0.947	0.360455
560	CEP89_KAN613-16_5.tif:0020-1985	0.888	66.357	0	399	109.415	143.028	0.827	58.927	11347	1.532	0.653	0.927	1.56948
										7229.76				1

## Sheet: IF condition
Exp. number	Cell line	Gene induced	Culture condition, fixation condition	rabbit-Alexa488	mouse IgG1-Alexa568	mouse IgG2b-Alexa647	Nuclear stain	Date	Replicate
KAN613-1	RPE-BFP-Cas9 pMCB306 (pool)		Serum starved for 24 hours. Fixed in 100% methanol at -20C for 5 minutes.	CEP89, 24002-1-AP, Proteintech, 1:500	CEP170, Invitrogen, 41-3200, 1:1000	Ac-Tub, 6B-11, Santa Cruz, 1:1000	DAPI	No.6	2021-03-02
KAN613-2	RPE-BFP-Cas9 CEP164KO (pool)		Serum starved for 24 hours. Fixed in 100% methanol at -20C for 5 minutes.	CEP89, 24002-1-AP, Proteintech, 1:500	CEP170, Invitrogen, 41-3200, 1:1000	Ac-Tub, 6B-11, Santa Cruz, 1:1000	DAPI	No.6	2021-03-02
KAN613-3	RPE-BFP-Cas9 CEP83 KO (pool)		Serum starved for 24 hours. Fixed in 100% methanol at -20C for 5 minutes.	CEP89, 24002-1-AP, Proteintech, 1:500	CEP170, Invitrogen, 41-3200, 1:1000	Ac-Tub, 6B-11, Santa Cruz, 1:1000	DAPI	No.6	2021-03-02
KAN613-4	RPE-BFP-Cas9 SCLT1 KO (pool)		Serum starved for 24 hours. Fixed in 100% methanol at -20C for 5 minutes.	CEP89, 24002-1-AP, Proteintech, 1:500	CEP170, Invitrogen, 41-3200, 1:1000	Ac-Tub, 6B-11, Santa Cruz, 1:1000	DAPI	No.6	2021-03-02
KAN613-5	RPE-BFP-Cas9 FBF1 KO (pool)		Serum starved for 24 hours. Fixed in 100% methanol at -20C for 5 minutes.	CEP89, 24002-1-AP, Proteintech, 1:500	CEP170, Invitrogen, 41-3200, 1:1000	Ac-Tub, 6B-11, Santa Cruz, 1:1000	DAPI	No.6	2021-03-02
KAN613-6	RPE-BFP-Cas9 CEP89KO (pool)		Serum starved for 24 hours. Fixed in 100% methanol at -20C for 5 minutes.	CEP89, 24002-1-AP, Proteintech, 1:500	CEP170, Invitrogen, 41-3200, 1:1000	Ac-Tub, 6B-11, Santa Cruz, 1:1000	DAPI	No.6	2021-03-02
KAN613-7	RPE-BFP-Cas9 CCDC92 KO (pool)		Serum starved for 24 hours. Fixed in 100% methanol at -20C for 5 minutes.	CEP89, 24002-1-AP, Proteintech, 1:500	CEP170, Invitrogen, 41-3200, 1:1000	Ac-Tub, 6B-11, Santa Cruz, 1:1000	DAPI	No.6	2021-03-02
KAN613-8	RPE-BFP-Cas9 ANKRD26 KO (pool)		Serum starved for 24 hours. Fixed in 100% methanol at -20C for 5 minutes.	CEP89, 24002-1-AP, Proteintech, 1:500	CEP170, Invitrogen, 41-3200, 1:1000	Ac-Tub, 6B-11, Santa Cruz, 1:1000	DAPI	No.6	2021-03-02
KAN613-9	RPE-BFP-Cas9 TTBK2 KO (pool)		Serum starved for 24 hours. Fixed in 100% methanol at -20C for 5 minutes.	CEP89, 24002-1-AP, Proteintech, 1:500	CEP170, Invitrogen, 41-3200, 1:1000	Ac-Tub, 6B-11, Santa Cruz, 1:1000	DAPI	No.6	2021-03-02
KAN613-10	RPE-BFP-Cas9 INPP5E KO (pool)		Serum starved for 24 hours. Fixed in 100% methanol at -20C for 5 minutes.	CEP89, 24002-1-AP, Proteintech, 1:500	CEP170, Invitrogen, 41-3200, 1:1000	Ac-Tub, 6B-11, Santa Cruz, 1:1000	DAPI	No.6	2021-03-02
KAN613-11	RPE-BFP-Cas9 Kiz KO (pool)		Serum starved for 24 hours. Fixed in 100% methanol at -20C for 5 minutes.	CEP89, 24002-1-AP, Proteintech, 1:500	CEP170, Invitrogen, 41-3200, 1:1000	Ac-Tub, 6B-11, Santa Cruz, 1:1000	DAPI	No.6	2021-03-02
KAN613-12	RPE-BFP-Cas9 LRRC45 KO (pool)		Serum starved for 24 hours. Fixed in 100% methanol at -20C for 5 minutes.	CEP89, 24002-1-AP, Proteintech, 1:500	CEP170, Invitrogen, 41-3200, 1:1000	Ac-Tub, 6B-11, Santa Cruz, 1:1000	DAPI	No.6	2021-03-02
KAN613-13	RPE-BFP-Cas9 NCS1 KO (pool)		Serum starved for 24 hours. Fixed in 100% methanol at -20C for 5 minutes.	CEP89, 24002-1-AP, Proteintech, 1:500	CEP170, Invitrogen, 41-3200, 1:1000	Ac-Tub, 6B-11, Santa Cruz, 1:1000	DAPI	No.6	2021-03-02
KAN613-14	RPE-BFP-Cas9 C3orf14 KO (pool)		Serum starved for 24 hours. Fixed in 100% methanol at -20C for 5 minutes.	CEP89, 24002-1-AP, Proteintech, 1:500	CEP170, Invitrogen, 41-3200, 1:1000	Ac-Tub, 6B-11, Santa Cruz, 1:1000	DAPI	No.6	2021-03-02
KAN613-15	RPE-BFP-Cas9 FOP KO (pool)		Serum starved for 24 hours. Fixed in 100% methanol at -20C for 5 minutes.	CEP89, 24002-1-AP, Proteintech, 1:500	CEP170, Invitrogen, 41-3200, 1:1000	Ac-Tub, 6B-11, Santa Cruz, 1:1000	DAPI	No.6	2021-03-02
KAN613-16	RPE-BFP-Cas9 sgSafe (pool)		Serum starved for 24 hours. Fixed in 100% methanol at -20C for 5 minutes.	CEP89, 24002-1-AP, Proteintech, 1:500	CEP170, Invitrogen, 41-3200, 1:1000	Ac-Tub, 6B-11, Santa Cruz, 1:1000	DAPI	No.6	2021-03-02
