# Supplementary material for: A hierarchical pathway for assembly of the distal appendages that organize primary cilia
Source: eLife. 2025 Jan 30;14:e85999. doi: 10.7554/eLife.85999 (PMC11984956; doi:10.7554/eLife.85999)
Supplement: Figure 2—source data 7. [file elife-85999-fig2-data7.xlsx]

## Sheet: Raw data
	Label	Area	Mean	Min	Max	X	Y	Circ	IntDen	RawIntDen	AR	Round	Solidity
327	ANKRD26_KAN624-1_1.tif:0001-0029	0.515	1292.95	370	2777	18.274	3.348	0.994	666.244	51718	1.209	0.827	0.976	0.681602
328	ANKRD26_KAN624-1_1.tif:0002-0069	0.67	1501.21	157	4141	90.9	7.875	0.974	1005.63	78063	1.153	0.867	0.963	1.02881
329	ANKRD26_KAN624-1_1.tif:0003-0104	0.837	896.246	23	2015	136.182	11.777	0.935	750.468	58256	1.329	0.753	0.915	0.767768
330	ANKRD26_KAN624-1_1.tif:0004-0234	0.773	1250.07	58	4861	65.064	26.621	0.799	966.22	75004	1.859	0.538	0.889	0.988493
331	ANKRD26_KAN624-1_1.tif:0005-0299	0.928	1059.11	12	3240	82.778	33.977	0.716	982.349	76256	1.77	0.565	0.842	1.00499
332	ANKRD26_KAN624-1_1.tif:0006-0343	0.721	1111.62	18	3465	129.202	38.939	0.943	801.933	62251	1.148	0.871	0.941	0.820419
333	ANKRD26_KAN624-1_1.tif:0007-0381	0.464	216.167	0	754	120.48	43.215	0.996	100.25	7782	1.23	0.813	0.935	0.102561
334	ANKRD26_KAN624-1_1.tif:0008-0495	0.683	1274.23	0	3227	48.855	56.19	0.993	869.99	67534	1.148	0.871	0.972	0.890044
335	ANKRD26_KAN624-1_1.tif:0009-0507	0.67	1326.56	134	3608	10.682	57.614	0.974	888.631	68981	1.153	0.867	0.963	0.909115
336	ANKRD26_KAN624-1_1.tif:0010-0525	0.721	731.268	31	1701	125.294	59.624	0.853	527.541	40951	1.707	0.586	0.896	0.539702
337	ANKRD26_KAN624-1_1.tif:0011-0539	1.147	1277.06	0	5802	72.409	61.129	0.829	1464.17	113658	1.743	0.574	0.932	1.49792
338	ANKRD26_KAN624-1_1.tif:0012-0780	1.069	1154.04	9	5891	30.611	88.469	0.798	1233.93	95785	1.686	0.593	0.917	1.26237
339	ANKRD26_KAN624-1_1.tif:0013-0798	0.85	1474.39	20	4189	95.392	90.578	0.949	1253.57	97310	1.207	0.829	0.923	1.28247
340	ANKRD26_KAN624-1_1.tif:0014-0845	1.275	1106.13	0	5248	74.56	96.031	0.829	1410.7	109507	1.657	0.603	0.943	1.44321
341	ANKRD26_KAN624-1_1.tif:0015-0862	0.696	1556.7	0	4317	127.311	97.881	0.79	1082.91	84062	1.56	0.641	0.871	1.10787
342	ANKRD26_KAN624-1_1.tif:0016-0917	0.605	1067.21	390	2054	25.481	104.136	0.985	646.161	50159	1.104	0.906	0.979	0.661056
343	ANKRD26_KAN624-1_1.tif:0017-1090	0.58	1430.38	151	3415	41.724	123.784	0.99	829.192	64367	1.202	0.832	0.968	0.848306
344	ANKRD26_KAN624-1_1.tif:0018-1202	0.605	1430.64	211	3538	77.741	136.435	0.94	866.203	67240	1.336	0.748	0.989	0.88617
345	ANKRD26_KAN624-1_2.tif:0001-0071	0.657	156.235	12	329	18.626	7.988	0.809	102.646	7968	1.497	0.668	0.85	0.105012
346	ANKRD26_KAN624-1_2.tif:0002-0115	0.593	1477.13	37	4347	125.872	13.053	0.964	875.323	67948	1.351	0.74	0.979	0.8955
347	ANKRD26_KAN624-1_2.tif:0003-0252	0.85	791.091	32	2313	11.267	28.576	0.758	672.608	52212	2.153	0.465	0.957	0.688112
348	ANKRD26_KAN624-1_2.tif:0004-0382	0.837	1649.03	36	6255	96.19	43.422	0.791	1380.81	107187	1.554	0.643	0.861	1.41264
349	ANKRD26_KAN624-1_2.tif:0005-0412	0.593	1274.24	64	3250	39.89	46.826	1	755.093	58615	1.15	0.87	0.968	0.772499
350	ANKRD26_KAN624-1_2.tif:0006-0429	0.824	1337.17	0	4511	135.608	48.755	0.885	1102.45	85579	1.689	0.592	0.928	1.12786
351	ANKRD26_KAN624-1_2.tif:0007-0534	0.541	1025.93	157	2120	73.967	60.677	1	555.083	43089	1.154	0.866	0.933	0.567879
352	ANKRD26_KAN624-1_2.tif:0008-0583	1.288	1003.83	0	4893	88.844	66.208	0.736	1293.16	100383	1.819	0.55	0.889	1.32297
353	ANKRD26_KAN624-1_2.tif:0009-0592	1.198	1148.56	43	4941	18.384	67.21	0.747	1376.03	106816	1.807	0.553	0.861	1.40775
354	ANKRD26_KAN624-1_2.tif:0010-0661	0.85	1308.82	0	4984	137.887	75.07	0.913	1112.8	86382	1.395	0.717	0.93	1.13845
355	ANKRD26_KAN624-1_2.tif:0011-0805	1.314	933.382	0	3664	28.117	91.408	0.819	1226.45	95205	1.533	0.652	0.891	1.25473
356	ANKRD26_KAN624-1_2.tif:0012-0934	0.67	1475.46	35	4188	57.023	106.022	0.974	988.378	76724	1.231	0.812	0.972	1.01116
357	ANKRD26_KAN624-1_2.tif:0013-0951	1.069	1013.35	14	4085	134.04	108.01	0.798	1083.5	84108	1.685	0.594	0.907	1.10848
358	ANKRD26_KAN624-1_2.tif:0014-1011	0.709	1252.51	8	4128	123.931	114.743	0.804	887.433	68888	1.309	0.764	0.866	0.907889
359	ANKRD26_KAN624-1_2.tif:0015-1246	0.515	1489.92	176	3795	18.047	141.478	0.994	767.744	59597	1.209	0.827	0.976	0.785441
360	ANKRD26_KAN624-1_3.tif:0001-0031	0.386	1131.6	301	2052	82.969	3.575	0.976	437.327	33948	1.2	0.833	1	0.447408
361	ANKRD26_KAN624-1_3.tif:0002-0075	0.979	858.316	0	4076	142.822	8.574	0.781	840.335	65232	1.89	0.529	0.874	0.859706
362	ANKRD26_KAN624-1_3.tif:0003-0137	0.438	1169.68	350	2280	98.972	15.55	1	512.314	39769	1.141	0.876	0.971	0.524124
363	ANKRD26_KAN624-1_3.tif:0004-0173	0.696	1562.33	156	4992	8.346	19.696	0.79	1086.82	84366	1.384	0.723	0.857	1.11188
364	ANKRD26_KAN624-1_3.tif:0005-0193	0.812	1131.51	36	3402	66.296	21.914	0.766	918.311	71285	1.559	0.641	0.84	0.939479
365	ANKRD26_KAN624-1_3.tif:0006-0256	0.58	1207.98	177	3113	116.747	29.1	0.99	700.266	54359	1.202	0.832	0.968	0.716408
366	ANKRD26_KAN624-1_3.tif:0007-0322	0.915	1144.7	0	4234	99.16	36.541	0.896	1046.99	81274	1.629	0.614	0.916	1.07113
367	ANKRD26_KAN624-1_3.tif:0008-0393	0.799	986.21	56	2958	142.801	44.626	0.892	787.685	61145	1.601	0.625	0.892	0.805842
368	ANKRD26_KAN624-1_3.tif:0009-0404	0.657	1385.47	154	3412	125.298	45.893	1	910.247	70659	1.194	0.837	0.962	0.931229
369	ANKRD26_KAN624-1_3.tif:0010-0428	1.031	1405.11	0	5006	69.679	48.608	0.875	1448.08	112409	1.446	0.692	0.952	1.48146
370	ANKRD26_KAN624-1_3.tif:0011-0470	0.709	1012.04	204	2369	21.155	53.261	0.837	717.052	55662	1.481	0.675	0.894	0.733581
371	ANKRD26_KAN624-1_3.tif:0012-0477	0.155	21.833	0	88	71.505	54.196	1	3.375	262	1.333	0.75	1	0.00345295
372	ANKRD26_KAN624-1_3.tif:0013-0494	0.876	857.544	0	2604	42.093	56.126	0.919	751.203	58313	1.499	0.667	0.986	0.768519
373	ANKRD26_KAN624-1_3.tif:0014-0504	0.76	1185.71	38	3214	105.664	57.245	0.863	901.204	69957	1.339	0.747	0.901	0.921977
374	ANKRD26_KAN624-1_3.tif:0015-0722	1.172	907.681	0	3666	127.545	81.966	0.848	1064.06	82599	1.742	0.574	0.943	1.08859
375	ANKRD26_KAN624-1_3.tif:0016-0813	0.863	1041.33	26	2565	69.156	92.28	0.892	898.782	69769	1.623	0.616	0.95	0.9195
376	ANKRD26_KAN624-1_3.tif:0017-0878	0.67	1701.15	121	4989	39.836	99.723	0.974	1139.56	88460	1.179	0.848	0.963	1.16583
377	ANKRD26_KAN624-1_3.tif:0018-0898	1.198	1003.48	0	5032	97.155	101.904	0.696	1202.22	93324	1.783	0.561	0.805	1.22994
378	ANKRD26_KAN624-1_3.tif:0019-0938	0.747	998.621	0	3604	140.503	106.51	0.802	746.14	57920	1.75	0.571	0.866	0.763339
379	ANKRD26_KAN624-1_3.tif:0020-0998	0.799	938.435	30	3270	4.463	113.251	0.944	749.528	58183	1.479	0.676	0.947	0.766806
380	ANKRD26_KAN624-1_3.tif:0021-1008	0.683	1226.47	0	3823	65.64	114.424	0.909	837.385	65003	1.211	0.826	0.972	0.856688
381	ANKRD26_KAN624-1_3.tif:0022-1044	0.644	1366.48	0	4655	93.479	118.469	0.981	880.167	68324	1.231	0.812	0.952	0.900456
382	ANKRD26_KAN624-1_3.tif:0023-1169	0.515	1315.17	190	3375	28.886	132.682	0.994	677.697	52607	1.209	0.827	0.976	0.693318
383	ANKRD26_KAN624-1_3.tif:0024-1191	0.631	1159.29	82	3564	76.593	135.207	0.961	731.776	56805	1.124	0.89	0.933	0.748645
384	ANKRD26_KAN624-1_3.tif:0025-1273	0.515	1143.88	209	2708	117.7	144.542	0.994	589.427	45755	1.209	0.827	0.976	0.603014
385	ANKRD26_KAN624-1_4.tif:0001-0019	0.644	911.98	205	2173	38.794	2.191	0.896	587.418	45599	1.286	0.777	0.943	0.600958
386	ANKRD26_KAN624-1_4.tif:0002-0029	0.683	1002.59	51	2642	122.889	3.323	0.775	684.524	53137	1.562	0.64	0.855	0.700303
387	ANKRD26_KAN624-1_4.tif:0003-0058	0.502	705.41	0	1375	82.464	6.622	0.949	354.404	27511	1.41	0.709	0.897	0.362573
388	ANKRD26_KAN624-1_4.tif:0004-0087	0.451	1230.46	170	2879	138.251	9.883	0.991	554.787	43066	1.065	0.939	0.986	0.567576
389	ANKRD26_KAN624-1_4.tif:0005-0096	0.76	1231.64	21	4825	99.019	10.968	0.849	936.115	72667	1.268	0.789	0.855	0.957693
390	ANKRD26_KAN624-1_4.tif:0006-0117	0.541	1366.19	279	2925	52.607	13.28	0.943	739.184	57380	1.167	0.857	1	0.756223
391	ANKRD26_KAN624-1_4.tif:0007-0177	0.683	1537.79	93	4191	24.183	20.14	0.993	1049.94	81503	1.148	0.871	0.972	1.07414
392	ANKRD26_KAN624-1_4.tif:0008-0268	0.67	1384	130	3561	70.767	30.405	0.974	927.11	71968	1.176	0.85	0.963	0.948481
393	ANKRD26_KAN624-1_4.tif:0009-0292	0.76	1235.32	57	3477	29.496	33.172	0.863	938.91	72884	1.23	0.813	0.915	0.960553
394	ANKRD26_KAN624-1_4.tif:0010-0348	0.67	1170.06	23	2716	113.033	39.566	0.974	783.795	60843	1.231	0.812	0.972	0.801862
395	ANKRD26_KAN624-1_4.tif:0011-0365	0.683	1369.38	249	3196	60.261	41.489	0.949	934.955	72577	1.185	0.844	0.972	0.956507
396	ANKRD26_KAN624-1_4.tif:0012-0544	1.108	986.791	0	4826	78.444	61.724	0.816	1093.24	84864	1.564	0.639	0.864	1.11844
397	ANKRD26_KAN624-1_4.tif:0013-0570	1.031	882.837	8	3169	123.228	64.718	0.795	909.835	70627	1.494	0.669	0.847	0.930808
398	ANKRD26_KAN624-1_4.tif:0014-0612	0.799	1442.92	70	3940	141.308	69.495	0.984	1152.46	89461	1.155	0.866	0.939	1.17902
399	ANKRD26_KAN624-1_4.tif:0015-0636	0.786	1235.33	0	3407	64.108	72.159	0.742	970.742	75355	1.345	0.744	0.813	0.993119
400	ANKRD26_KAN624-1_4.tif:0016-0713	0.863	1539.21	88	5665	19.591	81.018	0.927	1328.51	103127	1.099	0.91	0.918	1.35913
401	ANKRD26_KAN624-1_4.tif:0017-0730	0.515	45.45	0	139	49.273	82.861	0.973	23.42	1818	1.487	0.673	0.93	0.0239598
402	ANKRD26_KAN624-1_4.tif:0018-0961	0.863	1183.88	69	5100	100.257	109.013	0.666	1021.82	79320	1.908	0.524	0.775	1.04537
403	ANKRD26_KAN624-1_4.tif:0019-1070	0.515	1256.12	99	2952	40.917	121.445	0.994	647.269	50245	1.209	0.827	0.976	0.662189
404	ANKRD26_KAN624-1_4.tif:0020-1159	0.58	1314.18	227	3233	103.788	131.634	0.99	761.831	59138	1.078	0.928	0.957	0.779392
										67180.3				0.885383
405	ANKRD26_KAN624-2_1.tif:0001-0150	0.348	487.704	50	1024	133.201	17.036	1	169.633	13168	1.21	0.826	0.947	0.173544
406	ANKRD26_KAN624-2_1.tif:0002-0170	0.283	421.727	78	1184	39.823	19.295	1	119.522	9278	1.484	0.674	0.957	0.122277
407	ANKRD26_KAN624-2_1.tif:0003-0271	1.172	987.484	0	4806	72.826	30.728	0.826	1157.61	89861	1.488	0.672	0.85	1.1843
408	ANKRD26_KAN624-2_1.tif:0004-0300	0.605	1005.11	230	2137	4.49	34.1	0.966	608.558	47240	1.116	0.896	0.913	0.622586
409	ANKRD26_KAN624-2_1.tif:0005-0431	0.631	1155.82	97	2494	136.15	48.896	1	729.586	56635	1.121	0.892	0.942	0.746404
410	ANKRD26_KAN624-2_1.tif:0006-0449	0.593	1295.8	145	3276	89.552	50.962	0.964	767.872	59607	1.351	0.74	0.979	0.785573
411	ANKRD26_KAN624-2_1.tif:0007-0498	0.605	1077.09	230	1730	9.137	56.565	0.985	652.138	50623	1.002	0.998	0.979	0.667171
412	ANKRD26_KAN624-2_1.tif:0008-0686	0.837	1126.4	70	3666	70.275	77.893	0.914	943.187	73216	1.453	0.688	0.97	0.964928
413	ANKRD26_KAN624-2_1.tif:0009-0687	0.515	1615.58	122	4782	45.968	78.031	0.994	832.49	64623	1.209	0.827	0.976	0.85168
414	ANKRD26_KAN624-2_1.tif:0010-0754	0.76	1222.64	168	3796	93.285	85.697	0.936	929.274	72136	1.205	0.83	0.929	0.950695
415	ANKRD26_KAN624-2_1.tif:0011-0796	0.515	1090.83	70	2650	15.223	90.403	0.994	562.091	43633	1.166	0.857	0.976	0.575048
416	ANKRD26_KAN624-2_1.tif:0012-0938	0.49	75.605	0	202	38.832	106.517	0.996	37.011	2873	1.22	0.82	0.95	0.0378638
417	ANKRD26_KAN624-2_1.tif:0013-0971	0.58	1486.96	183	3798	70.755	110.253	0.99	861.99	66913	1.202	0.832	0.968	0.88186
418	ANKRD26_KAN624-2_1.tif:0014-1011	0.374	1140.55	73	2230	122.684	114.813	1	426.093	33076	1.215	0.823	0.983	0.435915
419	ANKRD26_KAN624-2_1.tif:0015-1019	0.593	1155.83	222	2633	27.983	115.706	0.964	684.924	53168	1.15	0.87	0.968	0.700712
420	ANKRD26_KAN624-2_1.tif:0016-1053	0.696	1296.04	129	3334	105.09	119.534	0.822	901.577	69986	1.366	0.732	0.864	0.92236
421	ANKRD26_KAN624-2_1.tif:0017-1243	0.322	945.24	290	1642	48.862	141.137	1	304.42	23631	1	1	1	0.311438
422	ANKRD26_KAN624-2_2.tif:0001-0176	0.966	1243.8	76	3651	42.236	19.934	0.867	1201.72	93285	1.496	0.669	0.877	1.22942
423	ANKRD26_KAN624-2_2.tif:0002-0251	0.528	1429.19	223	3489	67.766	28.537	0.968	754.861	58597	1.176	0.85	0.988	0.772262
424	ANKRD26_KAN624-2_2.tif:0003-0266	1.018	779.367	0	2751	92.24	30.219	0.882	793.16	61570	1.501	0.666	0.903	0.811443
425	ANKRD26_KAN624-2_2.tif:0004-0285	0.631	1310.57	56	3634	130.475	32.344	0.961	827.272	64218	1.368	0.731	0.951	0.846342
426	ANKRD26_KAN624-2_2.tif:0005-0452	0.889	626.261	0	2452	77.826	51.352	0.744	556.668	43212	1.926	0.519	0.852	0.5695
427	ANKRD26_KAN624-2_2.tif:0006-0498	0.605	1608.81	129	4460	113.67	56.58	0.985	974.079	75614	1.104	0.906	0.979	0.996532
428	ANKRD26_KAN624-2_2.tif:0007-0501	0.773	966.783	0	2687	8.702	56.913	0.952	747.261	58007	1.448	0.69	0.93	0.764486
429	ANKRD26_KAN624-2_2.tif:0008-0538	0.554	1506.3	192	4240	3.235	61.12	0.994	834.396	64771	1.319	0.758	0.956	0.85363
430	ANKRD26_KAN624-2_2.tif:0009-0542	0.812	1257.97	23	4386	93.053	61.572	0.871	1020.94	79252	1.382	0.723	0.9	1.04448
431	ANKRD26_KAN624-2_2.tif:0010-0627	0.386	1264.27	139	2470	53.118	71.221	0.976	488.598	37928	1.2	0.833	1	0.499861
432	ANKRD26_KAN624-2_2.tif:0011-0674	0.49	943.895	108	2227	112.177	76.478	0.944	462.061	35868	1.125	0.889	0.95	0.472712
433	ANKRD26_KAN624-2_2.tif:0012-0677	0.451	1534	58	5196	32.583	76.831	0.991	691.648	53690	1.065	0.939	0.986	0.707591
434	ANKRD26_KAN624-2_2.tif:0013-0844	0.67	1115.08	324	1940	78.496	95.781	0.974	746.965	57984	1.231	0.812	0.972	0.764183
435	ANKRD26_KAN624-2_2.tif:0014-0851	0.799	1103.66	0	2831	24.619	96.62	0.984	881.494	68427	1.122	0.891	0.932	0.901813
436	ANKRD26_KAN624-2_2.tif:0015-0997	0.799	1097.97	121	3193	117.418	113.163	0.858	876.946	68074	1.546	0.647	0.905	0.897161
437	ANKRD26_KAN624-2_2.tif:0016-1133	0.657	1017.51	253	2396	87.176	128.646	0.859	668.499	51893	1.712	0.584	0.927	0.683908
438	ANKRD26_KAN624-2_2.tif:0017-1144	0.657	816.51	57	1952	38.3	129.881	0.823	536.443	41642	1.772	0.564	0.936	0.548808
439	ANKRD26_KAN624-2_2.tif:0018-1197	0.361	1003.36	226	1972	89.369	135.839	0.967	361.914	28094	1.211	0.826	0.966	0.370257
440	ANKRD26_KAN624-2_2.tif:0019-1250	0.451	1002.74	195	1905	48.456	141.867	0.991	452.116	35096	1.065	0.939	0.986	0.462537
441	ANKRD26_KAN624-2_3.tif:0001-0054	0.322	1214.24	400	2059	57.147	6.186	1	391.054	30356	1	1	1	0.400068
442	ANKRD26_KAN624-2_3.tif:0002-0167	0.696	1285.18	51	2806	130.525	19.011	0.967	894.028	69400	1.172	0.853	0.982	0.914637
443	ANKRD26_KAN624-2_3.tif:0003-0168	0.386	951.733	310	1717	77.237	19.068	0.976	367.814	28552	1.2	0.833	1	0.376293
444	ANKRD26_KAN624-2_3.tif:0004-0191	0.824	1221.41	82	4117	32.66	21.615	0.778	1007.01	78170	1.588	0.63	0.859	1.03022
445	ANKRD26_KAN624-2_3.tif:0005-0208	0.876	1066.56	64	3270	105.163	23.563	0.827	934.298	72526	1.449	0.69	0.877	0.955835
446	ANKRD26_KAN624-2_3.tif:0006-0349	0.245	37.211	3	84	8.067	39.656	1	9.108	707	1.273	0.785	0.974	0.0093177
447	ANKRD26_KAN624-2_3.tif:0007-0354	0.593	762.043	0	1363	132.139	40.238	0.775	451.574	35054	1.879	0.532	0.852	0.461984
448	ANKRD26_KAN624-2_3.tif:0008-0483	0.58	1439.89	184	3658	65.761	54.865	0.99	834.706	64795	1.202	0.832	0.968	0.853946
449	ANKRD26_KAN624-2_3.tif:0009-0513	0.528	1420.32	192	3203	11.642	58.232	0.968	750.172	58233	1.176	0.85	0.988	0.767464
450	ANKRD26_KAN624-2_3.tif:0010-0517	0.696	1316.72	133	3000	96.305	58.694	0.967	915.967	71103	1.139	0.878	0.982	0.937081
451	ANKRD26_KAN624-2_3.tif:0011-0574	0.734	984.702	149	2126	106.181	65.092	0.904	723.055	56128	1.441	0.694	0.905	0.739722
452	ANKRD26_KAN624-2_3.tif:0012-0621	0.657	1206.47	209	2631	126.729	70.507	1	792.645	61530	1.114	0.897	0.953	0.810916
453	ANKRD26_KAN624-2_3.tif:0013-0725	0.451	1270.11	213	2982	48.019	82.279	0.991	572.668	44454	1.065	0.939	0.986	0.585868
454	ANKRD26_KAN624-2_3.tif:0014-0815	0.451	1093.03	205	2283	4.305	92.511	0.991	492.823	38256	1.065	0.939	0.986	0.504184
455	ANKRD26_KAN624-2_3.tif:0015-0841	0.734	1491.72	196	4179	90.504	95.51	0.96	1095.35	85028	1.302	0.768	0.95	1.1206
456	ANKRD26_KAN624-2_3.tif:0016-0877	0.876	847.338	14	2386	60.349	99.635	0.962	742.262	57619	1.184	0.844	0.889	0.759372
457	ANKRD26_KAN624-2_3.tif:0017-0877	0.631	1509.78	62	4734	140.336	99.543	0.961	953.016	73979	1.368	0.731	0.951	0.974984
458	ANKRD26_KAN624-2_3.tif:0018-0985	0.451	948.657	119	2554	141.886	111.75	0.77	427.729	33203	1.774	0.564	0.843	0.437589
459	ANKRD26_KAN624-2_3.tif:0019-1126	0.374	898.207	120	2078	65.82	127.85	1	335.557	26048	1.215	0.823	0.983	0.343292
460	ANKRD26_KAN624-2_4.tif:0001-0088	0.451	1203.09	358	2494	65.384	9.98	0.991	542.446	42108	1.065	0.939	0.986	0.55495
461	ANKRD26_KAN624-2_4.tif:0002-0107	0.812	898.651	0	2727	127.741	12.167	0.959	729.329	56615	1.394	0.717	0.955	0.746141
462	ANKRD26_KAN624-2_4.tif:0003-0141	0.438	951.647	249	1736	4.881	16.004	1	416.818	32356	1.141	0.876	0.971	0.426426
463	ANKRD26_KAN624-2_4.tif:0004-0377	0.554	740.837	0	1438	58.984	42.762	0.843	410.377	31856	1.619	0.618	0.869	0.419837
464	ANKRD26_KAN624-2_4.tif:0005-0415	0.863	926.478	1	2950	114.644	47.125	0.859	799.653	62074	1.627	0.615	0.931	0.818086
465	ANKRD26_KAN624-2_4.tif:0006-0544	0.515	1231.3	288	2790	59.02	61.801	0.994	634.477	49252	1.209	0.827	0.976	0.649102
466	ANKRD26_KAN624-2_4.tif:0007-0573	0.876	1137.82	134	3906	25.951	65.054	0.941	996.726	77372	1.321	0.757	0.925	1.0197
467	ANKRD26_KAN624-2_4.tif:0008-0688	0.451	1191.74	229	2415	44.322	78.145	0.938	537.332	41711	1.4	0.714	1	0.549718
468	ANKRD26_KAN624-2_4.tif:0009-0712	0.515	1185.75	202	2489	10.953	80.798	0.994	611.005	47430	1.166	0.857	0.976	0.62509
469	ANKRD26_KAN624-2_4.tif:0010-0742	0.966	1013.45	104	3597	104.173	84.231	0.781	979.167	76009	1.817	0.55	0.888	1.00174
470	ANKRD26_KAN624-2_4.tif:0011-0872	0.528	1223.07	156	2692	127.849	98.965	0.968	645.993	50146	1.176	0.85	0.988	0.660884
471	ANKRD26_KAN624-2_4.tif:0012-0976	0.386	985.367	329	1757	91.197	110.776	0.976	380.812	29561	1.2	0.833	1	0.38959
										52067.5				0.686208
472	ANKRD26_KAN624-3_1.tif:0001-0146	0.193	94.533	15	178	80.347	16.582	1	18.267	1418	1.137	0.88	0.968	0.0186881
473	ANKRD26_KAN624-3_1.tif:0002-0216	0.296	431.913	42	1092	55.558	24.573	1	127.972	9934	1.202	0.832	0.958	0.130922
474	ANKRD26_KAN624-3_1.tif:0003-0369	0.283	424.045	235	609	49.078	41.928	1	120.179	9329	1.101	0.908	0.936	0.122949
475	ANKRD26_KAN624-3_1.tif:0004-0662	0.322	1013.6	378	1987	144.202	75.194	1	326.436	25340	1	1	1	0.333961
476	ANKRD26_KAN624-3_1.tif:0005-0843	0.232	272.556	145	371	27.637	95.681	1	63.2	4906	1.362	0.734	0.947	0.0646572
477	ANKRD26_KAN624-3_1.tif:0006-0882	0.193	256.6	119	416	136.257	100.164	1	49.584	3849	1.667	0.6	1	0.0507267
478	ANKRD26_KAN624-3_2.tif:0001-0127	0.322	980.52	258	1870	55.899	14.471	1	315.783	24513	1	1	1	0.323062
479	ANKRD26_KAN624-3_2.tif:0002-0318	0.245	175.368	0	410	74.238	36.138	1	42.924	3332	1.273	0.785	0.974	0.0439131
480	ANKRD26_KAN624-3_2.tif:0003-0362	0.258	678.3	380	1267	114.351	41.087	1	174.761	13566	1.25	0.8	1	0.178789
481	ANKRD26_KAN624-3_2.tif:0004-0529	0.271	303.238	0	848	87.338	60.114	1	82.034	6368	1.182	0.846	0.913	0.0839252
482	ANKRD26_KAN624-3_2.tif:0005-0758	0.155	89.417	36	132	89.949	86.033	1	13.823	1073	1.333	0.75	1	0.0141413
483	ANKRD26_KAN624-3_2.tif:0006-0820	0.193	165.333	14	465	121.161	93.127	1	31.948	2480	1.667	0.6	1	0.0326844
484	ANKRD26_KAN624-3_2.tif:0007-1183	0.193	139.267	22	232	21.213	134.282	1	26.911	2089	1.137	0.88	0.968	0.0275314
485	ANKRD26_KAN624-3_3.tif:0001-0095	0.335	119.192	8	258	49.049	10.822	1	39.922	3099	1.224	0.817	0.929	0.0408423
486	ANKRD26_KAN624-3_3.tif:0002-0414	0.374	66.276	0	337	72.063	47.038	1	24.76	1922	1.215	0.823	0.983	0.0253304
487	ANKRD26_KAN624-3_3.tif:0003-0593	0.245	68.211	0	200	102.9	67.297	1	16.695	1296	1.273	0.785	0.974	0.0170802
488	ANKRD26_KAN624-3_3.tif:0004-0830	0.309	77.333	0	376	71.571	94.271	1	23.909	1856	1.091	0.916	0.98	0.0244606
489	ANKRD26_KAN624-3_3.tif:0005-0856	0.386	1084.83	412	1819	52.097	97.213	0.976	419.253	32545	1.2	0.833	1	0.428917
490	ANKRD26_KAN624-3_3.tif:0006-0927	0.335	49.615	0	247	130.468	105.215	1	16.618	1290	1.184	0.845	0.929	0.0170012
491	ANKRD26_KAN624-3_4.tif:0001-0131	0.515	119.5	0	329	10.363	14.925	0.973	61.577	4780	1.355	0.738	0.92	0.0629966
492	ANKRD26_KAN624-3_4.tif:0002-0269	0.232	444.944	261	611	13.79	30.513	1	103.174	8009	1.248	0.801	0.947	0.105552
493	ANKRD26_KAN624-3_4.tif:0003-0365	0.245	68.316	0	401	72.631	41.496	1	16.721	1298	1.273	0.785	0.974	0.0171066
494	ANKRD26_KAN624-3_4.tif:0004-0435	0.245	374.632	78	526	94.59	49.381	1	91.696	7118	1.273	0.785	0.974	0.0938096
495	ANKRD26_KAN624-3_4.tif:0005-0620	0.322	104.24	0	333	8.796	70.427	1	33.571	2606	1	1	1	0.034345
496	ANKRD26_KAN624-3_4.tif:0006-0657	0.451	1203.66	172	2801	141.997	74.578	0.991	542.704	42128	1.065	0.939	0.986	0.555213
497	ANKRD26_KAN624-3_4.tif:0007-0665	0.386	105.567	0	370	84.459	75.481	1	40.798	3167	1.004	0.996	0.909	0.0417385
498	ANKRD26_KAN624-3_4.tif:0008-0700	0.155	98.417	0	430	59.985	79.45	1	15.214	1181	1.333	0.75	1	0.0155646
499	ANKRD26_KAN624-3_4.tif:0009-0715	0.232	93.889	6	181	104.95	81.134	0.996	21.771	1690	1.372	0.729	0.947	0.0222729
500	ANKRD26_KAN624-3_4.tif:0010-1030	0.258	213.25	0	715	114.8	116.973	0.994	54.943	4265	1.515	0.66	0.909	0.0562093
501	ANKRD26_KAN624-3_4.tif:0011-1238	0.193	67.667	14	152	85.636	140.57	1	13.075	1015	1.667	0.6	1	0.0133769
										7582.07				0.0999256
502	ANKRD26_KAN624-4_1.tif:0001-0222	0.193	253.333	94	403	60.62	25.208	1	48.953	3800	1.137	0.88	0.968	0.050081
503	ANKRD26_KAN624-4_1.tif:0002-0304	0.58	171.333	6	412	12.557	34.548	0.99	99.322	7710	1.021	0.979	0.957	0.101612
504	ANKRD26_KAN624-4_1.tif:0003-0312	0.155	64.583	0	315	36.49	35.412	1	9.984	775	1.333	0.75	1	0.0102139
505	ANKRD26_KAN624-4_1.tif:0004-0442	0.477	221.73	0	581	121.124	50.144	0.9	105.686	8204	1.646	0.608	0.902	0.108122
506	ANKRD26_KAN624-4_1.tif:0005-0645	0.425	141.97	0	347	93.55	73.202	0.988	60.353	4685	1.057	0.946	0.957	0.0617446
507	ANKRD26_KAN624-4_1.tif:0006-0891	0.876	721.074	0	3049	107.229	101.105	0.759	631.655	49033	1.833	0.545	0.834	0.646216
508	ANKRD26_KAN624-4_1.tif:0007-0967	0.258	230.35	24	434	47.613	109.755	1	59.349	4607	1.25	0.8	1	0.0607166
509	ANKRD26_KAN624-4_1.tif:0008-1052	0.386	112.6	0	257	88.628	119.387	1	43.516	3378	1.116	0.896	0.923	0.0445193
510	ANKRD26_KAN624-4_1.tif:0009-1152	0.438	1024.03	319	2066	74.57	130.752	1	448.521	34817	1.141	0.876	0.971	0.45886
511	ANKRD26_KAN624-4_2.tif:0001-0004	0.167	270.538	120	473	20.626	0.493	0.956	45.307	3517	1.796	0.557	0.929	0.0463513
512	ANKRD26_KAN624-4_2.tif:0002-0116	0.335	101.615	0	281	115.355	13.149	1	34.035	2642	1.224	0.817	0.929	0.0348195
513	ANKRD26_KAN624-4_2.tif:0003-0239	0.605	186.702	0	443	35.947	27.089	0.947	113.042	8775	1.488	0.672	0.895	0.115647
514	ANKRD26_KAN624-4_2.tif:0004-0449	0.683	289.623	0	1010	117.392	51.005	0.975	197.743	15350	1.272	0.786	0.93	0.202301
515	ANKRD26_KAN624-4_2.tif:0005-0478	0.193	411.067	192	637	75.602	54.242	1	79.432	6166	1.137	0.88	0.968	0.081263
516	ANKRD26_KAN624-4_2.tif:0006-0487	0.747	837.466	100	2763	43.778	55.273	0.68	625.73	48573	2.106	0.475	0.795	0.640153
517	ANKRD26_KAN624-4_2.tif:0007-0636	0.335	473	114	1205	109.938	72.169	1	158.426	12298	1.392	0.719	0.945	0.162078
518	ANKRD26_KAN624-4_2.tif:0008-0639	0.425	179.121	0	365	141.997	72.521	0.988	76.147	5911	1.201	0.832	0.957	0.0779023
519	ANKRD26_KAN624-4_2.tif:0009-0935	0.309	194.458	15	365	88.019	106.123	1	60.121	4667	1.588	0.63	0.923	0.0615073
520	ANKRD26_KAN624-4_2.tif:0010-1006	0.271	85.619	39	120	139.337	114.222	1	23.162	1798	1.4	0.714	0.933	0.0236962
521	ANKRD26_KAN624-4_2.tif:0011-1037	0.296	186.087	52	334	16.855	117.756	1	55.136	4280	1.202	0.832	0.958	0.056407
522	ANKRD26_KAN624-4_2.tif:0012-1041	0.245	103.947	3	240	105.564	118.222	1	25.442	1975	1.273	0.785	0.974	0.0260289
523	ANKRD26_KAN624-4_3.tif:0001-0140	0.155	217.333	155	282	34.334	15.89	1	33.597	2608	1.333	0.75	1	0.0343714
524	ANKRD26_KAN624-4_3.tif:0002-0164	0.232	112.278	41	173	97.213	18.595	1	26.035	2021	1.248	0.801	0.947	0.0266352
525	ANKRD26_KAN624-4_3.tif:0003-0245	0.206	428.375	221	841	46.876	27.808	1	88.295	6854	1	1	1	0.0903303
526	ANKRD26_KAN624-4_3.tif:0004-0249	0.245	208.632	48	410	87.273	28.33	1	51.065	3964	1.273	0.785	0.974	0.0522424
527	ANKRD26_KAN624-4_3.tif:0005-0373	0.206	207.938	80	368	135.292	42.336	1	42.859	3327	1	1	1	0.0438472
528	ANKRD26_KAN624-4_3.tif:0006-0429	0.155	203.417	101	288	22.984	48.692	1	31.446	2441	1.333	0.75	1	0.0321704
529	ANKRD26_KAN624-4_3.tif:0007-0457	0.245	266.895	116	445	74.788	51.938	1	65.326	5071	1.273	0.785	0.974	0.0668317
530	ANKRD26_KAN624-4_3.tif:0008-0474	0.554	633.419	44	1469	106.884	53.885	0.994	350.874	27237	1.064	0.94	0.945	0.358962
531	ANKRD26_KAN624-4_3.tif:0009-0828	0.477	354.297	24	841	126.545	93.995	0.948	168.873	13109	1.423	0.703	0.892	0.172766
532	ANKRD26_KAN624-4_3.tif:0010-0906	0.502	127.077	0	245	121.336	102.87	0.949	63.844	4956	1.05	0.953	0.886	0.0653161
533	ANKRD26_KAN624-4_3.tif:0011-0921	0.283	297.636	185	444	26.652	104.518	0.949	84.353	6548	1.573	0.636	0.957	0.0862974
534	ANKRD26_KAN624-4_3.tif:0012-0961	0.335	214.115	113	288	98.247	109.056	1	71.715	5567	1.392	0.719	0.945	0.0733686
535	ANKRD26_KAN624-4_4.tif:0001-0042	0.322	1147.72	267	2105	115.032	4.824	1	369.63	28693	1	1	1	0.378151
536	ANKRD26_KAN624-4_4.tif:0002-0060	0.335	314.923	50	587	26.917	6.897	1	105.48	8188	1.242	0.805	0.945	0.107911
537	ANKRD26_KAN624-4_4.tif:0003-0101	0.438	163.971	37	313	81.209	11.44	0.891	71.819	5575	1.447	0.691	0.907	0.0734741
538	ANKRD26_KAN624-4_4.tif:0004-0298	0.155	152.5	84	242	116.281	33.823	1	23.575	1830	1.333	0.75	1	0.0241179
539	ANKRD26_KAN624-4_4.tif:0005-0361	0.515	429.075	83	634	96.296	41.042	0.973	221.098	17163	1.053	0.95	0.909	0.226195
540	ANKRD26_KAN624-4_4.tif:0006-0396	0.58	316.889	0	668	59.657	45.02	0.97	183.701	14260	1.178	0.849	0.9	0.187935
541	ANKRD26_KAN624-4_4.tif:0007-0411	0.412	252.281	0	712	37.565	46.737	0.838	103.998	8073	1.547	0.646	0.865	0.106396
542	ANKRD26_KAN624-4_4.tif:0008-0557	0.464	309.833	26	684	75.317	63.238	0.996	143.689	11154	1.285	0.778	0.923	0.147001
543	ANKRD26_KAN624-4_4.tif:0009-0810	0.657	236.98	22	612	108.667	91.992	0.897	155.695	12086	1.361	0.735	0.903	0.159284
544	ANKRD26_KAN624-4_4.tif:0010-0834	0.296	206.913	0	421	65.936	94.671	0.992	61.307	4759	1.503	0.665	0.979	0.0627198
										9963.84				0.131315
545	ANKRD26_KAN624-5_1.tif:0001-0158	0.451	1297.29	176	2756	65.595	17.925	0.991	584.919	45405	1.065	0.939	0.986	0.598402
546	ANKRD26_KAN624-5_1.tif:0002-0402	0.683	2060.3	167	6149	59.764	45.622	0.949	1406.69	109196	1.208	0.828	0.972	1.43912
547	ANKRD26_KAN624-5_1.tif:0003-0468	0.747	1581.15	11	5404	95.7	53.155	0.936	1181.39	91707	1.126	0.888	0.959	1.20863
548	ANKRD26_KAN624-5_1.tif:0004-0501	0.67	1292.54	170	3597	30.972	56.944	0.974	865.842	67212	1.163	0.86	0.972	0.885801
549	ANKRD26_KAN624-5_1.tif:0005-0508	0.773	1114.53	277	2066	13.961	57.658	1	861.462	66872	1	1	0.968	0.88132
550	ANKRD26_KAN624-5_1.tif:0006-0509	0.232	213.333	85	357	72.999	57.828	1	49.468	3840	1.248	0.801	0.947	0.0506081
551	ANKRD26_KAN624-5_1.tif:0007-0558	0.438	1491.18	32	3688	129.731	63.333	1	653.13	50700	1.141	0.876	0.971	0.668186
552	ANKRD26_KAN624-5_1.tif:0008-0871	0.696	1131.26	288	1947	40.08	98.915	0.967	786.951	61088	1.139	0.878	0.982	0.805091
553	ANKRD26_KAN624-5_1.tif:0009-0872	0.618	1623.38	9	4264	136.087	98.972	0.916	1003.81	77922	1.333	0.75	1	1.02695
554	ANKRD26_KAN624-5_1.tif:0010-0922	0.515	1552.1	198	3711	18.16	104.704	0.994	799.782	62084	1.209	0.827	0.976	0.818218
555	ANKRD26_KAN624-5_1.tif:0011-0998	0.683	1032.89	204	2077	90.356	113.366	0.932	705.213	54743	1.492	0.67	0.938	0.721469
556	ANKRD26_KAN624-5_1.tif:0012-1140	0.747	1328.4	130	4859	96.706	129.355	0.772	992.539	77047	1.296	0.772	0.841	1.01542
557	ANKRD26_KAN624-5_1.tif:0013-1181	0.554	1326.02	165	3903	33.88	134.1	0.994	734.533	57019	1.319	0.758	0.956	0.751465
558	ANKRD26_KAN624-5_1.tif:0014-1264	0.567	985.455	102	1791	4.22	143.544	0.922	558.574	43360	1.191	0.839	0.957	0.57145
559	ANKRD26_KAN624-5_2.tif:0001-0019	0.683	1512.13	185	4071	9.3	2.218	0.949	1032.42	80143	1.185	0.844	0.972	1.05622
560	ANKRD26_KAN624-5_2.tif:0002-0103	1.031	1150.75	29	3780	68.402	11.753	0.759	1185.94	92060	1.441	0.694	0.833	1.21328
561	ANKRD26_KAN624-5_2.tif:0003-0286	0.593	1107.72	235	2197	43.974	32.525	1	656.415	50955	1.052	0.95	0.968	0.671546
562	ANKRD26_KAN624-5_2.tif:0004-0300	0.322	1008.04	699	1399	104.25	34.107	1	324.646	25201	1	1	1	0.332129
563	ANKRD26_KAN624-5_2.tif:0005-0501	0.837	1518.18	93	3958	133.482	56.927	0.99	1271.25	98682	1.216	0.823	0.963	1.30055
564	ANKRD26_KAN624-5_2.tif:0006-0543	0.67	1272.02	169	3515	46.775	61.687	0.974	852.097	66145	1.176	0.85	0.963	0.871738
565	ANKRD26_KAN624-5_2.tif:0007-0551	0.386	1010.53	430	1683	77.918	62.539	0.976	390.538	30316	1.2	0.833	1	0.399541
566	ANKRD26_KAN624-5_2.tif:0008-0746	0.67	1721.71	92	4917	112.492	84.717	0.974	1153.34	89529	1.231	0.812	0.972	1.17992
567	ANKRD26_KAN624-5_2.tif:0009-0854	0.528	1385.83	2	2990	144.675	96.966	0.902	731.957	56819	1.77	0.565	0.965	0.748829
568	ANKRD26_KAN624-5_2.tif:0010-0868	0.696	1431.11	142	4152	42.336	98.587	0.967	995.54	77280	1.143	0.875	0.982	1.01849
569	ANKRD26_KAN624-5_2.tif:0011-0976	0.631	663.857	233	1216	95.223	110.761	0.943	419.047	32529	1.397	0.716	0.907	0.428706
570	ANKRD26_KAN624-5_2.tif:0012-0989	0.322	1006.6	603	1345	51.359	112.308	1	324.182	25165	1	1	1	0.331655
571	ANKRD26_KAN624-5_2.tif:0013-1006	0.76	1372.64	209	3323	22.137	114.163	0.994	1043.28	80986	1.112	0.899	0.967	1.06733
572	ANKRD26_KAN624-5_2.tif:0014-1050	0.605	1390.64	209	3713	85.522	119.232	0.985	841.984	65360	1.104	0.906	0.979	0.861393
573	ANKRD26_KAN624-5_2.tif:0015-1052	0.515	1257	277	2533	125.474	119.402	0.994	647.72	50280	1.209	0.827	0.976	0.66265
574	ANKRD26_KAN624-5_2.tif:0016-1071	0.876	1220.52	0	4036	104.717	121.518	0.905	1069.16	82995	1.392	0.718	0.932	1.09381
575	ANKRD26_KAN624-5_2.tif:0017-1162	0.67	1235.63	119	3097	108.622	131.931	0.974	827.723	64253	1.179	0.848	0.963	0.846803
576	ANKRD26_KAN624-5_2.tif:0018-1196	0.515	1038.33	328	1994	56.807	135.746	0.994	535.039	41533	1.209	0.827	0.976	0.547372
577	ANKRD26_KAN624-5_2.tif:0019-1201	0.683	1387.32	100	3861	72.714	136.293	0.949	947.206	73528	1.188	0.841	0.981	0.96904
578	ANKRD26_KAN624-5_3.tif:0001-0033	0.696	1411.48	122	3784	88.19	3.802	0.967	981.885	76220	1.172	0.853	0.982	1.00452
579	ANKRD26_KAN624-5_3.tif:0002-0106	0.631	1323	239	2784	141.932	12.088	0.935	835.118	64827	1	1	1	0.854368
580	ANKRD26_KAN624-5_3.tif:0003-0136	0.799	1499.24	103	4478	53.74	15.41	0.944	1197.44	92953	1.432	0.698	0.947	1.22505
581	ANKRD26_KAN624-5_3.tif:0004-0207	0.541	1464.21	163	3567	20.6	23.495	0.943	792.22	61497	1.167	0.857	1	0.810481
582	ANKRD26_KAN624-5_3.tif:0005-0279	0.232	291.056	103	546	101.753	31.667	1	67.49	5239	1.362	0.734	0.947	0.0690458
583	ANKRD26_KAN624-5_3.tif:0006-0290	0.747	1419.41	165	3826	68.45	32.915	0.977	1060.54	82326	1.021	0.979	0.951	1.08499
584	ANKRD26_KAN624-5_3.tif:0007-0334	0.734	950.386	88	1752	123.786	37.956	1	697.857	54172	1.283	0.779	0.958	0.713944
585	ANKRD26_KAN624-5_3.tif:0008-0365	0.271	104.286	2	204	123.577	41.436	0.971	28.212	2190	1.548	0.646	0.933	0.0288625
586	ANKRD26_KAN624-5_3.tif:0009-0476	0.464	1028.78	513	1587	59.815	54.026	0.965	477.107	37036	1	1	1	0.488105
587	ANKRD26_KAN624-5_3.tif:0010-0491	0.541	1073	355	1993	139.354	55.777	0.88	580.552	45066	1.349	0.741	0.933	0.593934
588	ANKRD26_KAN624-5_3.tif:0011-0506	0.515	1209.67	271	2792	34.901	57.431	0.994	623.334	48387	1.209	0.827	0.976	0.637702
589	ANKRD26_KAN624-5_3.tif:0012-0525	0.283	52.182	5	122	65.324	59.634	1	14.789	1148	1.288	0.776	0.936	0.0151297
590	ANKRD26_KAN624-5_3.tif:0013-0561	0.863	1676.55	52	5863	94.778	63.754	0.927	1447.05	112329	1.148	0.871	0.924	1.48041
591	ANKRD26_KAN624-5_3.tif:0014-0598	0.747	1265.93	202	3192	5.489	67.924	0.977	945.866	73424	1.306	0.765	0.967	0.96767
592	ANKRD26_KAN624-5_3.tif:0015-0821	1.082	850.333	0	2825	112.307	93.213	0.835	920.153	71428	1.436	0.696	0.889	0.941364
593	ANKRD26_KAN624-5_3.tif:0016-0858	0.67	1523.27	103	4740	83.988	97.427	0.974	1020.4	79210	1.179	0.848	0.963	1.04392
594	ANKRD26_KAN624-5_3.tif:0017-0965	0.515	1492.62	305	3811	36.15	109.528	0.994	769.135	59705	1.209	0.827	0.976	0.786864
595	ANKRD26_KAN624-5_3.tif:0018-0989	0.773	1569.53	213	5815	128.936	112.306	0.914	1213.15	94172	1.131	0.884	0.916	1.24111
596	ANKRD26_KAN624-5_3.tif:0019-1127	0.696	1185.8	211	2542	129.972	127.971	0.967	824.889	64033	1.139	0.878	0.982	0.843904
597	ANKRD26_KAN624-5_3.tif:0020-1169	0.515	1090.28	118	2751	67.518	132.752	0.944	561.808	43611	1.215	0.823	0.976	0.574758
598	ANKRD26_KAN624-5_3.tif:0021-1264	0.515	957.175	360	1883	29.056	143.521	0.994	493.223	38287	1.209	0.827	0.976	0.504592
599	ANKRD26_KAN624-5_4.tif:0001-0117	0.76	1694.25	351	4709	36.263	13.323	0.953	1287.72	99961	1.303	0.767	0.967	1.31741
600	ANKRD26_KAN624-5_4.tif:0002-0169	0.67	1628.6	139	4276	137.222	19.238	1	1090.96	84687	1.139	0.878	0.963	1.11611
601	ANKRD26_KAN624-5_4.tif:0003-0342	0.541	1301.69	154	3154	59.985	38.817	0.943	704.286	54671	1.167	0.857	1	0.72052
602	ANKRD26_KAN624-5_4.tif:0004-0374	0.696	1205.91	306	2183	109.755	42.493	0.967	838.879	65119	1.143	0.875	0.982	0.858216
603	ANKRD26_KAN624-5_4.tif:0005-0428	0.979	789.842	41	1809	139.856	48.644	0.861	773.296	60028	1.745	0.573	0.956	0.791121
604	ANKRD26_KAN624-5_4.tif:0006-0455	0.631	718.02	16	1399	20.206	51.627	0.988	453.236	35183	1.067	0.938	0.891	0.463684
605	ANKRD26_KAN624-5_4.tif:0007-0546	0.709	1847.27	0	5464	84.323	62.034	0.943	1308.84	101600	1.15	0.87	0.991	1.33901
606	ANKRD26_KAN624-5_4.tif:0008-0552	0.915	860.789	0	2327	119.323	62.728	0.715	787.312	61116	2.07	0.483	0.877	0.80546
607	ANKRD26_KAN624-5_4.tif:0009-0675	0.657	1279.55	264	3312	62.646	76.663	1	840.657	65257	1.157	0.864	0.953	0.860035
608	ANKRD26_KAN624-5_4.tif:0010-0676	0.58	45.378	0	112	89.649	76.778	0.925	26.306	2042	1.467	0.682	0.918	0.0269119
609	ANKRD26_KAN624-5_4.tif:0011-0689	0.773	1422.08	0	4712	134.849	78.304	0.914	1099.18	85325	1.148	0.871	0.923	1.12452
610	ANKRD26_KAN624-5_4.tif:0012-0891	0.644	1236.3	155	3511	11.634	101.129	0.981	796.316	61815	1.317	0.759	0.962	0.814672
611	ANKRD26_KAN624-5_4.tif:0013-0893	0.515	956.35	458	1415	45.357	101.341	0.944	492.798	38254	1.215	0.823	0.976	0.504157
612	ANKRD26_KAN624-5_4.tif:0014-0986	0.58	1540.67	200	3801	144.328	111.98	0.99	893.127	69330	1.202	0.832	0.968	0.913714
613	ANKRD26_KAN624-5_4.tif:0015-1086	0.361	677.321	259	1209	79.182	123.261	1	244.312	18965	1.199	0.834	0.966	0.249944
614	ANKRD26_KAN624-5_4.tif:0016-1110	1.095	1623.82	87	4530	25.063	126.056	0.818	1778.07	138025	1.787	0.56	0.904	1.81906
615	ANKRD26_KAN624-5_4.tif:0017-1149	0.541	1277.86	92	2680	138.64	130.412	0.943	691.39	53670	1.167	0.857	1	0.707328
616	ANKRD26_KAN624-5_4.tif:0018-1181	0.67	1545.33	111	4251	106.563	134.111	0.974	1035.18	80357	1.231	0.812	0.972	1.05904
617	ANKRD26_KAN624-5_4.tif:0019-1182	0.593	1269.63	202	3328	44.038	134.169	0.964	752.362	58403	1.33	0.752	0.979	0.769705
										61548.2				0.811157
618	ANKRD26_KAN624-6_1.tif:0001-0025	0.58	1316.89	154	3167	83.605	2.882	0.99	763.402	59260	1.202	0.832	0.968	0.781
619	ANKRD26_KAN624-6_1.tif:0002-0060	0.618	1174.21	123	2042	115.933	6.874	0.96	726.069	56362	1.049	0.953	0.99	0.742806
620	ANKRD26_KAN624-6_1.tif:0003-0082	0.515	1208.65	185	2484	66.866	9.378	0.944	622.805	48346	1.215	0.823	0.976	0.637162
621	ANKRD26_KAN624-6_1.tif:0004-0106	0.657	1120.96	174	2767	1.437	12.025	1	736.465	57169	1.194	0.837	0.962	0.753442
622	ANKRD26_KAN624-6_1.tif:0005-0180	0.85	1844.55	33	7121	33.161	20.475	0.965	1568.29	121740	1.166	0.857	0.964	1.60444
623	ANKRD26_KAN624-6_1.tif:0006-0239	0.709	1029.45	188	2373	132.359	27.208	0.926	729.393	56620	1.4	0.714	0.948	0.746206
624	ANKRD26_KAN624-6_1.tif:0007-0338	0.683	1454.57	120	3591	83.586	38.37	0.993	993.119	77092	1.148	0.871	0.972	1.01601
625	ANKRD26_KAN624-6_1.tif:0008-0359	0.824	1259.69	140	2820	135.358	40.734	0.974	1038.57	80620	1.179	0.848	0.948	1.06251
626	ANKRD26_KAN624-6_1.tif:0009-0438	0.992	1140.81	262	2848	120.76	49.655	0.859	1131.6	87842	1.544	0.648	0.911	1.15769
627	ANKRD26_KAN624-6_1.tif:0010-0473	0.515	1026.3	277	2123	45.797	53.686	0.994	528.842	41052	1.209	0.827	0.976	0.541033
628	ANKRD26_KAN624-6_1.tif:0011-0539	0.76	1394.63	160	4378	142.272	61.233	0.994	1059.99	82283	1.278	0.782	0.967	1.08442
629	ANKRD26_KAN624-6_1.tif:0012-0553	0.928	1395.33	157	5201	96.886	62.736	0.832	1294.2	100464	1.21	0.826	0.857	1.32404
630	ANKRD26_KAN624-6_1.tif:0013-0667	0.657	1288.77	115	3405	143.652	75.688	0.955	846.712	65727	1.276	0.784	0.962	0.866229
631	ANKRD26_KAN624-6_1.tif:0014-0692	0.85	1579.41	188	4583	94.704	78.552	1	1342.86	104241	1.137	0.88	0.964	1.37381
632	ANKRD26_KAN624-6_1.tif:0015-0701	0.67	1150.85	286	2156	10.102	79.62	1	770.925	59844	1.139	0.878	0.963	0.788696
633	ANKRD26_KAN624-6_1.tif:0016-0865	0.709	1345.78	138	3789	33.96	98.207	0.967	953.519	74018	1.157	0.864	0.924	0.975498
634	ANKRD26_KAN624-6_1.tif:0017-0948	0.747	1379.69	79	4872	101.575	107.598	0.92	1030.86	80022	1.175	0.851	0.899	1.05463
635	ANKRD26_KAN624-6_1.tif:0018-1020	0.528	1096.95	274	1734	25.035	115.777	0.968	579.379	44975	1.176	0.85	0.988	0.592735
636	ANKRD26_KAN624-6_1.tif:0019-1195	0.515	1540.17	84	4193	108.052	135.689	0.994	793.637	61607	1.209	0.827	0.976	0.811931
637	ANKRD26_KAN624-6_1.tif:0020-1221	0.67	1287.35	165	2814	60.382	138.64	1	862.364	66942	1.139	0.878	0.963	0.882242
638	ANKRD26_KAN624-6_2.tif:0001-0066	0.502	1129.2	465	2137	92.553	7.498	1	567.321	44039	1.261	0.793	0.963	0.580399
639	ANKRD26_KAN624-6_2.tif:0002-0115	0.902	960.271	0	3944	20.704	13.161	0.781	865.932	67219	1.845	0.542	0.848	0.885893
640	ANKRD26_KAN624-6_2.tif:0003-0252	0.824	867.641	0	2071	113.294	28.648	0.9	715.339	55529	1.494	0.669	0.955	0.731828
641	ANKRD26_KAN624-6_2.tif:0004-0279	0.94	1529.66	0	4766	47.396	31.743	0.936	1438.5	111665	1.176	0.851	0.954	1.47166
642	ANKRD26_KAN624-6_2.tif:0005-0373	0.966	1079.65	0	4360	141.619	42.297	0.809	1043.13	80974	1.504	0.665	0.862	1.06717
643	ANKRD26_KAN624-6_2.tif:0006-0394	0.193	120.6	34	211	79.779	44.73	1	23.304	1809	1.137	0.88	0.968	0.0238412
644	ANKRD26_KAN624-6_2.tif:0007-0411	0.657	1099.78	286	2615	13.922	46.643	1	722.553	56089	1.194	0.837	0.962	0.739208
645	ANKRD26_KAN624-6_2.tif:0008-0471	1.056	1077.6	0	2863	70.172	53.446	0.884	1138.31	88363	1.535	0.652	0.932	1.16455
646	ANKRD26_KAN624-6_2.tif:0009-0527	0.541	1477.88	100	3823	37.058	59.815	0.943	799.614	62071	1.167	0.857	1	0.818046
647	ANKRD26_KAN624-6_2.tif:0010-0617	0.837	1382.35	45	2837	136.194	70.091	0.99	1157.51	89853	1.146	0.872	0.956	1.18419
648	ANKRD26_KAN624-6_2.tif:0011-0661	0.644	1712.6	66	4785	76.669	75.024	0.981	1103.11	85630	1.317	0.759	0.962	1.12854
649	ANKRD26_KAN624-6_2.tif:0012-0806	1.005	1249.14	54	5824	60.756	91.571	0.654	1255.16	97433	1.675	0.597	0.804	1.28409
650	ANKRD26_KAN624-6_2.tif:0013-0834	0.966	1071.03	16	2522	71.701	94.675	0.809	1034.79	80327	1.518	0.659	0.893	1.05865
651	ANKRD26_KAN624-6_2.tif:0014-0865	0.515	1048.65	474	1978	7.207	98.178	0.994	540.359	41946	1.209	0.827	0.976	0.552815
652	ANKRD26_KAN624-6_2.tif:0015-0916	0.605	1507.7	196	3689	51.245	104.023	0.985	912.862	70862	1.104	0.906	0.979	0.933905
653	ANKRD26_KAN624-6_2.tif:0016-0936	0.928	1302.65	78	3785	100.618	106.227	0.804	1208.24	93791	1.478	0.676	0.867	1.23609
654	ANKRD26_KAN624-6_2.tif:0017-1191	0.67	1411.23	214	3503	100.888	135.222	0.974	945.351	73384	1.153	0.867	0.963	0.967143
655	ANKRD26_KAN624-6_3.tif:0001-0057	0.889	1227.49	0	3202	70.335	6.541	0.954	1091.09	84697	1.02	0.98	0.932	1.11624
656	ANKRD26_KAN624-6_3.tif:0002-0060	0.618	1426.06	240	3195	139.669	6.86	0.96	881.803	68451	1.049	0.953	0.99	0.90213
657	ANKRD26_KAN624-6_3.tif:0003-0174	0.386	953.033	489	1334	8.456	19.749	0.976	368.316	28591	1.2	0.833	1	0.376807
658	ANKRD26_KAN624-6_3.tif:0004-0240	0.747	1804.53	127	6306	105.782	27.24	0.977	1348.3	104663	1.241	0.805	0.967	1.37937
659	ANKRD26_KAN624-6_3.tif:0005-0310	1.108	1219.31	0	3437	125.028	35.186	0.884	1350.85	104861	1.342	0.745	0.905	1.38198
660	ANKRD26_KAN624-6_3.tif:0006-0314	0.696	1847.87	196	5211	76.669	35.639	0.967	1285.46	99785	1.172	0.853	0.982	1.31509
661	ANKRD26_KAN624-6_3.tif:0007-0415	0.876	1471.23	114	3949	101.82	47.173	0.956	1288.79	100044	1.113	0.899	0.971	1.3185
662	ANKRD26_KAN624-6_3.tif:0008-0421	0.657	1309.77	99	3377	21.798	47.858	1	860.509	66798	1.194	0.837	0.962	0.880344
663	ANKRD26_KAN624-6_3.tif:0009-0509	0.58	1291.67	135	3404	36.415	57.778	0.943	748.781	58125	1.352	0.74	0.968	0.766041
664	ANKRD26_KAN624-6_3.tif:0010-0580	0.438	309.029	101	615	109.187	65.83	1	135.354	10507	1.141	0.876	0.971	0.138474
665	ANKRD26_KAN624-6_3.tif:0011-0658	0.812	1438.75	0	5565	132.706	74.805	0.871	1167.66	90641	1.488	0.672	0.913	1.19458
666	ANKRD26_KAN624-6_3.tif:0012-0811	0.76	1428.41	88	4535	62.409	92.061	0.976	1085.66	84276	1.267	0.789	0.929	1.11069
667	ANKRD26_KAN624-6_3.tif:0013-0919	1.301	1241.55	0	6677	101.721	104.303	0.756	1615.4	125397	1.816	0.551	0.867	1.65263
668	ANKRD26_KAN624-6_3.tif:0014-1024	1.082	1079.69	0	4547	119.341	116.254	0.846	1168.34	90694	1.526	0.655	0.944	1.19527
669	ANKRD26_KAN624-6_3.tif:0015-1167	0.528	1304.32	213	2548	23.955	132.503	0.968	688.904	53477	1.176	0.85	0.988	0.704784
670	ANKRD26_KAN624-6_3.tif:0016-1270	0.58	1327.89	202	2934	136.534	144.151	0.943	769.779	59755	1.388	0.72	0.968	0.787523
671	ANKRD26_KAN624-6_4.tif:0001-0008	0.683	1443	159	4083	8.747	0.971	0.993	985.222	76479	1.148	0.871	0.972	1.00793
672	ANKRD26_KAN624-6_4.tif:0002-0096	0.773	1378.55	133	3435	91.027	10.896	1	1065.53	82713	1	1	0.968	1.09009
673	ANKRD26_KAN624-6_4.tif:0003-0191	0.747	1720.64	106	4836	33.471	21.667	1	1285.61	99797	1.069	0.936	0.959	1.31524
674	ANKRD26_KAN624-6_4.tif:0004-0212	0.85	1372.32	16	4368	53.422	24.041	0.846	1166.78	90573	1.306	0.766	0.917	1.19368
675	ANKRD26_KAN624-6_4.tif:0005-0217	0.605	1061.26	266	1901	78.017	24.686	0.985	642.554	49879	1.002	0.998	0.979	0.657365
676	ANKRD26_KAN624-6_4.tif:0006-0234	0.824	1246.09	321	2901	113.443	26.559	1	1027.36	79750	1.181	0.846	0.955	1.05104
677	ANKRD26_KAN624-6_4.tif:0007-0346	0.863	1708.3	0	5435	80.139	39.282	0.786	1474.45	114456	1.277	0.783	0.859	1.50844
678	ANKRD26_KAN624-6_4.tif:0008-0360	0.863	1191.16	0	4121	10.324	40.939	0.964	1028.11	79808	1.096	0.912	0.924	1.05181
679	ANKRD26_KAN624-6_4.tif:0009-0424	0.85	990.076	86	2916	122.532	48.084	0.803	841.791	65345	1.625	0.615	0.863	0.861195
680	ANKRD26_KAN624-6_4.tif:0010-0486	0.721	1507.96	164	4289	72.94	55.222	0.943	1087.86	84446	1.379	0.725	0.949	1.11293
681	ANKRD26_KAN624-6_4.tif:0011-0566	0.67	1596.6	270	4903	129.958	64.298	0.974	1069.52	83023	1.25	0.8	0.963	1.09418
682	ANKRD26_KAN624-6_4.tif:0012-0644	0.528	1360.44	248	3161	35.931	73.101	0.968	718.546	55778	1.176	0.85	0.988	0.73511
683	ANKRD26_KAN624-6_4.tif:0013-0673	0.593	1325.61	295	3566	61.793	76.447	0.964	785.534	60978	1.15	0.87	0.968	0.803641
684	ANKRD26_KAN624-6_4.tif:0014-0806	0.824	1399.06	49	4273	30.734	91.54	0.974	1153.48	89540	1.082	0.924	0.948	1.18007
685	ANKRD26_KAN624-6_4.tif:0015-0883	0.837	1400.71	254	2884	91.772	100.248	0.99	1172.88	91046	1.132	0.884	0.963	1.19991
686	ANKRD26_KAN624-6_4.tif:0016-0950	1.018	1219.85	0	3711	51.689	107.803	0.913	1241.44	96368	1.243	0.804	0.919	1.27005
687	ANKRD26_KAN624-6_4.tif:0017-1122	0.709	1619.24	169	5002	74.954	127.346	0.967	1147.27	89058	1.109	0.902	0.94	1.17371
688	ANKRD26_KAN624-6_4.tif:0018-1261	0.709	981.782	135	2782	19.754	143.164	0.967	695.616	53998	1.043	0.959	0.932	0.711651
689	ANKRD26_KAN624-6_4.tif:0019-1260	0.554	1059.95	300	2321	115.259	143.067	0.994	587.147	45578	1.319	0.758	0.956	0.600682
										74258.1				0.978663
690	ANKRD26_KAN624-7_1.tif:0001-0018	0.451	1273.26	364	2468	80.253	2.035	0.991	574.085	44564	1.065	0.939	0.986	0.587318
691	ANKRD26_KAN624-7_1.tif:0002-0055	0.322	1035.48	459	1338	135.122	6.299	1	333.483	25887	1	1	1	0.34117
692	ANKRD26_KAN624-7_1.tif:0003-0077	0.696	1304.28	222	2842	15.678	8.796	0.967	907.31	70431	1.139	0.878	0.982	0.928224
693	ANKRD26_KAN624-7_1.tif:0004-0086	0.747	1694.53	78	5103	18.007	9.845	0.936	1266.11	98283	1.323	0.756	0.967	1.29529
694	ANKRD26_KAN624-7_1.tif:0005-0227	0.786	1476.15	197	4331	46.776	25.816	0.968	1159.98	90045	1.35	0.741	0.946	1.18672
695	ANKRD26_KAN624-7_1.tif:0006-0244	0.889	910.623	46	3321	67.028	27.7	0.839	809.431	62833	1.779	0.562	0.92	0.828089
696	ANKRD26_KAN624-7_1.tif:0007-0360	0.734	1555.83	147	4444	88.183	40.867	1	1142.42	88682	1.195	0.837	0.958	1.16876
697	ANKRD26_KAN624-7_1.tif:0008-0450	0.58	1044.16	377	2159	29.907	51.132	1	605.298	46987	1	1	0.957	0.619251
698	ANKRD26_KAN624-7_1.tif:0009-0526	0.657	1446.61	132	3983	141.609	59.707	1	950.414	73777	1.194	0.837	0.962	0.972322
699	ANKRD26_KAN624-7_1.tif:0010-0532	0.631	1097.63	388	1991	118.331	60.406	0.961	692.859	53784	1.191	0.84	0.942	0.70883
700	ANKRD26_KAN624-7_1.tif:0011-0583	0.837	1613.65	42	6362	84.12	66.224	0.951	1351.18	104887	1.229	0.814	0.956	1.38233
701	ANKRD26_KAN624-7_1.tif:0012-0676	0.58	1291.6	183	3232	42.72	76.77	0.99	748.742	58122	1.202	0.832	0.968	0.766002
702	ANKRD26_KAN624-7_1.tif:0013-0788	1.262	1053.49	0	5545	68.468	89.546	0.846	1329.99	103242	1.674	0.597	0.925	1.36065
703	ANKRD26_KAN624-7_1.tif:0014-0831	0.76	1199.14	207	2474	138.692	94.312	0.994	911.406	70749	1.034	0.967	0.959	0.932415
704	ANKRD26_KAN624-7_1.tif:0015-0840	0.889	1176.68	0	4211	22.415	95.291	0.904	1045.92	81191	1.378	0.726	0.879	1.07003
705	ANKRD26_KAN624-7_1.tif:0016-0843	0.76	1642.29	141	3908	118.376	95.674	0.994	1248.23	96895	1.034	0.967	0.959	1.277
706	ANKRD26_KAN624-7_1.tif:0017-0982	0.863	975.806	0	4109	90.155	111.427	0.722	842.229	65379	2.087	0.479	0.859	0.861643
707	ANKRD26_KAN624-7_1.tif:0018-1058	0.683	1066.04	229	1749	47.052	120.076	0.993	727.847	56500	1.148	0.871	0.972	0.744625
708	ANKRD26_KAN624-7_1.tif:0019-1062	0.67	1574.12	133	3854	83.139	120.55	0.974	1054.46	81854	1.176	0.85	0.963	1.07877
709	ANKRD26_KAN624-7_1.tif:0020-1094	0.67	1275.92	115	2958	21.951	124.182	0.974	854.712	66348	1.231	0.812	0.972	0.874414
710	ANKRD26_KAN624-7_1.tif:0021-1176	0.747	776.121	37	1694	67.247	133.507	0.705	579.895	45015	1.641	0.609	0.795	0.593262
711	ANKRD26_KAN624-7_1.tif:0022-1191	0.657	1360.94	111	3538	114.937	135.162	0.955	894.131	69408	1.276	0.784	0.962	0.914742
712	ANKRD26_KAN624-7_2.tif:0001-0016	0.657	1368.57	216	3965	32.921	1.866	0.955	899.143	69797	1.259	0.794	0.962	0.919869
713	ANKRD26_KAN624-7_2.tif:0002-0036	0.386	1135.27	261	1914	132.909	4.143	0.976	438.744	34058	1.2	0.833	1	0.448857
714	ANKRD26_KAN624-7_2.tif:0003-0086	0.515	1324.85	282	2809	125.645	9.818	0.994	682.682	52994	1.209	0.827	0.976	0.698419
715	ANKRD26_KAN624-7_2.tif:0004-0175	0.386	1184.4	340	2209	109.584	19.863	0.976	457.732	35532	1.2	0.833	1	0.468283
716	ANKRD26_KAN624-7_2.tif:0005-0289	0.786	1231.69	146	3799	90.265	32.89	0.929	967.882	75133	1.098	0.91	0.924	0.990193
717	ANKRD26_KAN624-7_2.tif:0006-0339	0.953	831.514	84	3087	15.938	38.477	0.659	792.671	61532	1.922	0.52	0.775	0.810943
718	ANKRD26_KAN624-7_2.tif:0007-0350	0.773	1325.42	69	4025	48.937	39.84	0.952	1024.46	79525	1.121	0.892	0.93	1.04808
719	ANKRD26_KAN624-7_2.tif:0008-0382	0.631	1321.47	135	3346	124.233	43.354	0.961	834.152	64752	1.368	0.731	0.951	0.85338
720	ANKRD26_KAN624-7_2.tif:0009-0461	0.696	1542.59	230	4110	59.884	52.324	0.967	1073.09	83300	1.143	0.875	0.982	1.09783
721	ANKRD26_KAN624-7_2.tif:0010-0471	0.709	1338.35	99	4871	77.303	53.538	0.873	948.25	73609	1.222	0.818	0.873	0.970108
722	ANKRD26_KAN624-7_2.tif:0011-0493	0.593	1373.3	191	3560	43.86	56.02	1	813.798	63172	1.052	0.95	0.968	0.832557
723	ANKRD26_KAN624-7_2.tif:0012-0510	0.696	1102.43	27	3271	17.744	57.904	0.747	766.893	59531	1.954	0.512	0.831	0.784571
724	ANKRD26_KAN624-7_2.tif:0013-0607	0.824	23.891	0	68	2.632	68.942	0.936	19.697	1529	1.256	0.796	0.948	0.020151
725	ANKRD26_KAN624-7_2.tif:0014-0693	0.528	1130.66	186	2326	15.161	78.662	0.968	597.183	46357	1.176	0.85	0.988	0.610948
726	ANKRD26_KAN624-7_2.tif:0015-0765	0.799	1348.95	169	4454	139.442	86.815	0.907	1077.41	83635	1.134	0.882	0.932	1.10224
727	ANKRD26_KAN624-7_2.tif:0016-0851	0.76	1236.02	349	2628	58.219	96.593	0.994	939.438	72925	1.034	0.967	0.959	0.961093
728	ANKRD26_KAN624-7_2.tif:0017-0864	0.709	1148.45	43	3169	106.856	98.071	0.888	813.707	63165	1.311	0.763	0.932	0.832464
729	ANKRD26_KAN624-7_2.tif:0018-0912	0.747	1371.07	142	3472	81.368	103.5	1	1024.42	79522	1.069	0.936	0.959	1.04804
730	ANKRD26_KAN624-7_2.tif:0019-0917	0.644	1275.38	208	3836	102.729	104.136	0.981	821.488	63769	1.164	0.859	0.943	0.840425
731	ANKRD26_KAN624-7_2.tif:0020-0923	0.528	1399.9	329	3201	36.767	104.826	0.968	739.39	57396	1.176	0.85	0.988	0.756433
732	ANKRD26_KAN624-7_2.tif:0021-0980	0.67	1606.15	235	4058	127.674	111.276	0.974	1075.93	83520	1.231	0.812	0.972	1.10073
733	ANKRD26_KAN624-7_2.tif:0022-1122	0.438	1067.71	182	2239	27.127	127.347	1	467.652	36302	1.141	0.876	0.971	0.478431
734	ANKRD26_KAN624-7_2.tif:0023-1176	0.644	1334.58	139	3649	62.085	133.521	0.981	859.62	66729	1.237	0.808	0.952	0.879435
735	ANKRD26_KAN624-7_2.tif:0024-1180	0.502	1106.28	318	2411	94.483	133.937	1	555.805	43145	1.261	0.793	0.963	0.568617
736	ANKRD26_KAN624-7_3.tif:0001-0083	0.683	1498.87	65	3543	101.701	9.471	0.949	1023.37	79440	1.208	0.828	0.972	1.04696
737	ANKRD26_KAN624-7_3.tif:0002-0103	0.322	951.32	579	1229	129.56	11.747	1	306.379	23783	1	1	1	0.313441
738	ANKRD26_KAN624-7_3.tif:0003-0138	0.618	1222.12	292	2839	95.34	15.663	0.916	755.699	58662	1.333	0.75	1	0.773118
739	ANKRD26_KAN624-7_3.tif:0004-0249	0.67	1561.69	73	4365	49.87	28.275	0.974	1046.14	81208	1.153	0.867	0.963	1.07026
740	ANKRD26_KAN624-7_3.tif:0005-0315	0.515	1233.2	212	3436	18.061	35.795	0.944	635.456	49328	1.215	0.823	0.976	0.650104
741	ANKRD26_KAN624-7_3.tif:0006-0316	0.451	1187.66	322	2236	86.43	35.923	0.938	535.489	41568	1.4	0.714	1	0.547833
742	ANKRD26_KAN624-7_3.tif:0007-0347	0.85	1663.82	0	6113	68.485	39.481	0.949	1414.63	109812	1.379	0.725	0.923	1.44723
743	ANKRD26_KAN624-7_3.tif:0008-0398	0.67	1077.42	3	3587	40.912	45.173	0.805	721.741	56026	1.772	0.564	0.929	0.738378
744	ANKRD26_KAN624-7_3.tif:0009-0559	0.657	1236.57	234	3275	130.531	63.51	1	812.419	63065	1.157	0.864	0.953	0.831146
745	ANKRD26_KAN624-7_3.tif:0010-0592	1.069	1008.67	0	3766	75.858	67.224	0.667	1078.5	83720	1.943	0.515	0.806	1.10336
746	ANKRD26_KAN624-7_3.tif:0011-0789	0.657	1486.77	150	4185	138.407	89.546	1	976.797	75825	1.157	0.864	0.953	0.999313
747	ANKRD26_KAN624-7_3.tif:0012-1005	0.657	1472.2	48	4074	52.839	114.06	0.955	967.225	75082	1.279	0.782	0.962	0.989521
748	ANKRD26_KAN624-7_3.tif:0013-1036	0.657	1378.78	111	3777	62.419	117.649	0.914	905.854	70318	1.536	0.651	0.971	0.926735
749	ANKRD26_KAN624-7_3.tif:0014-1074	0.593	1350.72	135	3133	133.703	121.911	0.964	800.413	62133	1.33	0.752	0.979	0.818863
750	ANKRD26_KAN624-7_3.tif:0015-1078	0.683	1417.11	183	4188	82.066	122.403	0.949	967.547	75107	1.208	0.828	0.972	0.98985
751	ANKRD26_KAN624-7_3.tif:0016-1120	0.605	1470.7	104	3657	29.226	127.177	0.985	890.46	69123	1.104	0.906	0.979	0.910986
752	ANKRD26_KAN624-7_3.tif:0017-1126	0.502	1303.67	133	3512	12.99	127.808	1	654.972	50843	1.261	0.793	0.963	0.67007
753	ANKRD26_KAN624-7_3.tif:0018-1176	0.438	1539.85	208	3710	107.371	133.476	1	674.45	52355	1.141	0.876	0.971	0.689997
754	ANKRD26_KAN624-7_4.tif:0001-0016	0.593	1736.98	153	4667	87.901	1.88	1	1029.31	79901	1.15	0.87	0.968	1.05303
755	ANKRD26_KAN624-7_4.tif:0002-0028	0.528	1247.93	319	2550	5.059	3.185	0.968	659.12	51165	1.176	0.85	0.988	0.674314
756	ANKRD26_KAN624-7_4.tif:0003-0096	0.322	1253.52	487	2115	120.026	10.953	1	403.704	31338	1	1	1	0.41301
757	ANKRD26_KAN624-7_4.tif:0004-0101	0.863	939.955	33	3529	70.847	11.513	0.815	811.286	62977	1.671	0.598	0.887	0.829987
758	ANKRD26_KAN624-7_4.tif:0005-0174	0.683	1170.19	259	3226	7.113	19.831	0.932	798.957	62020	1.312	0.762	0.922	0.817374
759	ANKRD26_KAN624-7_4.tif:0006-0294	0.94	1207.15	0	4149	64.408	33.281	0.815	1135.21	88122	1.699	0.589	0.912	1.16138
760	ANKRD26_KAN624-7_4.tif:0007-0393	0.193	905.333	588	1192	112.717	44.594	1	174.941	13580	1.137	0.88	0.968	0.178974
761	ANKRD26_KAN624-7_4.tif:0008-0480	0.876	985.235	6	3127	21.592	54.508	0.786	863.059	66996	1.655	0.604	0.824	0.882954
762	ANKRD26_KAN624-7_4.tif:0009-0562	0.58	1289.62	186	3489	31.597	63.856	0.99	747.596	58033	1.202	0.832	0.968	0.764829
763	ANKRD26_KAN624-7_4.tif:0010-0588	0.889	1470.23	171	3600	95.624	66.795	1	1306.85	101446	1	1	0.945	1.33698
764	ANKRD26_KAN624-7_4.tif:0011-0649	0.928	1111.9	0	3926	135.746	73.586	0.68	1031.31	80057	1.757	0.569	0.857	1.05509
765	ANKRD26_KAN624-7_4.tif:0012-0666	0.915	1247.52	65	4762	68.534	75.584	0.683	1141.03	88574	1.615	0.619	0.789	1.16733
766	ANKRD26_KAN624-7_4.tif:0013-0738	0.515	1727.75	209	4460	114.621	83.834	0.944	890.292	69110	1.215	0.823	0.976	0.910815
767	ANKRD26_KAN624-7_4.tif:0014-0863	0.657	1294.92	229	3313	137.002	98.003	1	850.757	66041	1.279	0.782	0.962	0.870368
768	ANKRD26_KAN624-7_4.tif:0015-0903	0.953	1099.43	0	5456	68.66	102.549	0.726	1048.07	81358	1.68	0.595	0.779	1.07223
769	ANKRD26_KAN624-7_4.tif:0016-0946	0.528	1396.22	361	2780	21.345	107.436	0.968	737.445	57245	1.176	0.85	0.988	0.754443
770	ANKRD26_KAN624-7_4.tif:0017-1038	0.786	1144.05	0	3810	106.334	117.851	0.782	899.014	69787	1.48	0.676	0.859	0.919737
771	ANKRD26_KAN624-7_4.tif:0018-1078	0.554	1240.77	210	3109	11.18	122.41	0.994	687.307	53353	1.319	0.758	0.956	0.70315
772	ANKRD26_KAN624-7_4.tif:0019-1120	0.322	1066	585	1515	36.377	127.177	1	343.312	26650	1	1	1	0.351226
773	ANKRD26_KAN624-7_4.tif:0020-1167	0.605	1387.91	306	3150	103.96	132.463	0.94	840.335	65232	1.336	0.748	0.989	0.859706
										64954.5				0.856048
774	ANKRD26_KAN624-8_1.tif:0001-0029	0.283	150.045	19	270	29.397	3.292	1	42.524	3301	1.542	0.649	0.957	0.0435045
775	ANKRD26_KAN624-8_1.tif:0002-0030	0.155	132.917	72	233	130.355	3.405	1	20.547	1595	1.333	0.75	1	0.0210208
776	ANKRD26_KAN624-8_1.tif:0003-0061	0.554	282.233	0	641	44.776	6.993	0.994	156.339	12136	1.197	0.836	0.945	0.159943
777	ANKRD26_KAN624-8_1.tif:0004-0200	0.155	14	0	33	2.781	22.7	1	2.164	168	1.333	0.75	1	0.00221411
778	ANKRD26_KAN624-8_1.tif:0005-0250	0.528	169.878	0	424	46.019	28.371	0.976	89.725	6965	1.532	0.653	0.891	0.0917931
779	ANKRD26_KAN624-8_1.tif:0006-0339	0.309	159.458	1	300	91.074	38.524	1	49.3	3827	1.091	0.916	0.98	0.0504368
780	ANKRD26_KAN624-8_1.tif:0007-0416	0.348	276.852	162	447	67.358	47.256	0.91	96.295	7475	1.815	0.551	0.9	0.0985145
781	ANKRD26_KAN624-8_1.tif:0008-0689	0.709	235.727	0	525	10.332	78.184	0.967	167.018	12965	1.264	0.791	0.94	0.170868
782	ANKRD26_KAN624-8_1.tif:0009-1141	0.232	175.056	32	259	95.51	129.504	1	40.592	3151	1.362	0.734	0.947	0.0415277
783	ANKRD26_KAN624-8_1.tif:0010-1170	0.296	135.696	52	267	116.054	132.871	1	40.206	3121	1.008	0.992	0.958	0.0411323
784	ANKRD26_KAN624-8_2.tif:0001-0032	0.283	200.909	70	367	126.553	3.632	1	56.94	4420	1.542	0.649	0.957	0.0582521
785	ANKRD26_KAN624-8_2.tif:0002-0123	0.245	108.632	5	195	29.161	14.029	1	26.589	2064	1.273	0.785	0.974	0.0272019
786	ANKRD26_KAN624-8_2.tif:0003-0297	0.206	185.562	15	290	126.439	33.71	1	38.247	2969	1	1	1	0.0391291
787	ANKRD26_KAN624-8_2.tif:0004-0319	0.232	232	106	327	104.477	36.188	1	53.796	4176	1.248	0.801	0.947	0.0550363
788	ANKRD26_KAN624-8_2.tif:0005-0342	0.399	457.71	121	1221	65.74	38.812	1	182.786	14189	1.196	0.836	0.939	0.187
789	ANKRD26_KAN624-8_2.tif:0006-0456	0.206	125.312	9	246	65.717	51.756	1	25.829	2005	1	1	1	0.0264243
790	ANKRD26_KAN624-8_2.tif:0007-0643	0.464	135.75	0	447	133.079	72.993	0.996	62.956	4887	1.303	0.768	0.935	0.0644068
791	ANKRD26_KAN624-8_2.tif:0008-0660	0.361	107.179	0	372	90.63	74.89	1	38.66	3001	1.186	0.843	0.966	0.0395508
792	ANKRD26_KAN624-8_2.tif:0009-0914	0.361	228.75	77	379	120.253	103.739	1	82.511	6405	1.266	0.79	0.966	0.0844128
793	ANKRD26_KAN624-8_2.tif:0010-0914	0.296	197.174	113	279	46.365	103.815	1	58.421	4535	1.008	0.992	0.958	0.0597677
794	ANKRD26_KAN624-8_2.tif:0011-1100	0.605	39.213	0	112	83.057	124.948	1	23.742	1843	1.333	0.75	0.94	0.0242893
795	ANKRD26_KAN624-8_3.tif:0001-0042	0.399	63.613	0	232	81.59	4.791	1	25.404	1972	1.323	0.756	0.939	0.0259894
796	ANKRD26_KAN624-8_3.tif:0002-0179	0.541	93.929	0	410	51.213	20.317	0.971	50.82	3945	1.362	0.734	0.944	0.051992
797	ANKRD26_KAN624-8_3.tif:0003-0197	0.567	100.295	0	337	52.587	22.419	0.904	56.849	4413	1.253	0.798	0.889	0.0581598
798	ANKRD26_KAN624-8_3.tif:0004-0454	0.348	45.704	0	181	53.675	51.582	0.993	15.897	1234	1.288	0.777	0.947	0.0162631
799	ANKRD26_KAN624-8_3.tif:0005-0546	0.644	99.36	0	521	133.944	62.039	1	63.999	4968	1.158	0.864	0.952	0.0654743
800	ANKRD26_KAN624-8_3.tif:0006-0549	0.271	21.81	0	114	70.67	62.352	1	5.9	458	1.4	0.714	0.933	0.00603607
801	ANKRD26_KAN624-8_3.tif:0007-0691	0.412	50.562	0	118	74.318	78.46	1	20.843	1618	1.222	0.818	0.955	0.0213239
802	ANKRD26_KAN624-8_3.tif:0008-0793	0.193	431.733	143	679	123.386	90.017	1	83.425	6476	1.137	0.88	0.968	0.0853485
803	ANKRD26_KAN624-8_3.tif:0009-0927	0.425	108.727	0	589	73.085	105.206	1	46.222	3588	1.071	0.934	0.957	0.047287
804	ANKRD26_KAN624-8_3.tif:0010-1013	0.361	149.679	21	268	80.257	114.976	1	53.99	4191	1.413	0.708	0.903	0.055234
805	ANKRD26_KAN624-8_3.tif:0011-1217	0.193	23.933	5	42	34.402	138.118	1	4.625	359	1.137	0.88	0.968	0.00473133
806	ANKRD26_KAN624-8_4.tif:0001-0077	0.271	150.571	16	370	70.411	8.796	1	40.734	3162	1.182	0.846	0.913	0.0416726
807	ANKRD26_KAN624-8_4.tif:0002-0153	0.361	141.75	0	504	33.981	17.345	0.967	51.13	3969	1.211	0.826	0.966	0.0523083
808	ANKRD26_KAN624-8_4.tif:0003-0205	0.451	205.914	0	521	135.358	23.246	1	92.842	7207	1.189	0.841	0.921	0.0949825
809	ANKRD26_KAN624-8_4.tif:0004-0253	0.232	199.444	109	335	52.342	28.791	0.996	46.247	3590	1.372	0.729	0.947	0.0473133
810	ANKRD26_KAN624-8_4.tif:0005-0267	0.271	198.667	33	447	29.324	30.345	1	53.745	4172	1.4	0.714	0.933	0.0549836
811	ANKRD26_KAN624-8_4.tif:0006-0291	0.335	131.5	0	270	142.512	33.011	1	44.044	3419	1.392	0.719	0.945	0.0450597
812	ANKRD26_KAN624-8_4.tif:0007-0464	0.283	121.591	0	259	15.978	52.695	0.863	34.46	2675	1.768	0.566	0.846	0.0352544
813	ANKRD26_KAN624-8_4.tif:0008-0496	0.593	188.5	0	479	96.761	56.271	1	111.702	8671	1.15	0.869	0.92	0.114277
814	ANKRD26_KAN624-8_4.tif:0009-0507	0.386	59.7	0	348	49.471	57.529	1	23.072	1791	1.116	0.896	0.923	0.023604
815	ANKRD26_KAN624-8_4.tif:0010-0640	0.245	160.526	24	265	60.791	72.631	1	39.291	3050	1.273	0.785	0.974	0.0401966
816	ANKRD26_KAN624-8_4.tif:0011-0644	0.283	144.045	0	275	11.283	73.161	1	40.824	3169	1.101	0.908	0.936	0.0417649
817	ANKRD26_KAN624-8_4.tif:0012-0711	0.412	258.844	48	566	89.392	80.748	1	106.704	8283	1.391	0.719	0.955	0.109163
818	ANKRD26_KAN624-8_4.tif:0013-0790	0.206	54.125	0	219	50.621	89.722	0.958	11.156	866	1.662	0.602	0.889	0.0114132
819	ANKRD26_KAN624-8_4.tif:0014-1040	0.425	168.152	36	248	122.912	118.049	1	71.484	5549	1.071	0.934	0.957	0.0731314
										4304.2				0.0567259
820	ANKRD26_KAN624-9_1.tif:0001-0309	0.309	291.292	127	502	50.328	35.138	1	90.06	6991	1.091	0.916	0.98	0.0921358
821	ANKRD26_KAN624-9_1.tif:0002-0348	0.193	526.733	72	1595	94.897	39.509	1	101.783	7901	1.137	0.88	0.968	0.104129
822	ANKRD26_KAN624-9_1.tif:0003-0471	0.58	1138.64	138	2709	81.209	53.503	0.99	660.074	51239	1.096	0.912	0.957	0.675289
823	ANKRD26_KAN624-9_1.tif:0004-0588	0.245	488.474	5	1388	28.934	66.783	1	119.56	9281	1.273	0.785	0.974	0.122316
824	ANKRD26_KAN624-9_1.tif:0005-0843	0.219	356.471	68	1294	30.595	95.691	1	78.066	6060	1.497	0.668	0.919	0.079866
825	ANKRD26_KAN624-9_2.tif:0001-0154	0.451	1214.89	145	2610	84.728	17.536	0.938	547.766	42521	1.4	0.714	1	0.560393
826	ANKRD26_KAN624-9_2.tif:0002-0204	0.193	261.133	140	409	41.416	23.165	1	50.46	3917	1.137	0.88	0.968	0.0516229
827	ANKRD26_KAN624-9_2.tif:0003-0285	0.799	1121.73	57	2816	21.153	32.322	0.984	895.922	69547	1.084	0.923	0.939	0.916574
828	ANKRD26_KAN624-9_2.tif:0004-0299	0.451	1117.23	113	2636	109.406	33.928	0.991	503.735	39103	1.065	0.939	0.986	0.515346
829	ANKRD26_KAN624-9_2.tif:0005-0543	0.386	1001.7	275	1831	78.883	61.687	0.976	387.125	30051	1.2	0.833	1	0.396048
830	ANKRD26_KAN624-9_2.tif:0006-0669	0.438	768.618	21	1983	37.632	75.988	0.891	336.652	26133	1.673	0.598	0.919	0.344412
831	ANKRD26_KAN624-9_2.tif:0007-0686	0.271	705.476	100	1202	134.668	77.934	1	190.851	14815	1.182	0.846	0.913	0.19525
832	ANKRD26_KAN624-9_2.tif:0008-0718	0.451	1501.31	264	3720	75.648	81.55	0.938	676.911	52546	1.4	0.714	1	0.692514
833	ANKRD26_KAN624-9_2.tif:0009-0782	0.438	1055.59	243	2033	20.771	88.757	1	462.344	35890	1.141	0.876	0.971	0.473002
834	ANKRD26_KAN624-9_2.tif:0010-0914	0.734	933.439	0	3205	92.766	103.714	0.904	685.413	53206	1.339	0.747	0.905	0.701213
835	ANKRD26_KAN624-9_2.tif:0011-0968	0.618	845.854	29	2604	104.938	109.847	0.702	523.032	40601	2.106	0.475	0.842	0.535089
836	ANKRD26_KAN624-9_2.tif:0012-0994	0.283	158.409	0	382	38.657	112.902	1	44.895	3485	1.068	0.937	0.936	0.0459295
837	ANKRD26_KAN624-9_3.tif:0001-0013	0.528	1075.76	230	1898	33.207	1.469	0.968	568.185	44106	1.176	0.85	0.988	0.581282
838	ANKRD26_KAN624-9_3.tif:0002-0027	0.502	732.026	9	1658	137.852	3.054	0.921	367.775	28549	1.598	0.626	0.987	0.376253
839	ANKRD26_KAN624-9_3.tif:0003-0054	0.451	1335.94	171	3129	124.842	6.121	0.991	602.348	46758	1.065	0.939	0.986	0.616233
840	ANKRD26_KAN624-9_3.tif:0004-0141	0.438	609.941	0	1075	67.696	15.987	0.994	267.152	20738	1.417	0.706	0.919	0.27331
841	ANKRD26_KAN624-9_3.tif:0005-0143	0.58	702.222	42	2451	104.388	16.262	0.772	407.079	31600	2.178	0.459	0.947	0.416463
842	ANKRD26_KAN624-9_3.tif:0006-0242	0.966	991.933	0	4068	21.911	27.451	0.867	958.375	74395	1.532	0.653	0.877	0.980467
843	ANKRD26_KAN624-9_3.tif:0007-0269	0.67	1353.13	7	3835	85.398	30.56	0.974	906.434	70363	1.153	0.867	0.972	0.927328
844	ANKRD26_KAN624-9_3.tif:0008-0378	0.593	1045.13	9	3191	20.506	42.942	0.824	619.327	48076	2.023	0.494	0.968	0.633603
845	ANKRD26_KAN624-9_3.tif:0009-0396	1.005	779.09	4	2252	104.874	44.974	0.775	782.842	60769	2.137	0.468	0.897	0.800887
846	ANKRD26_KAN624-9_3.tif:0010-0635	0.721	779.464	18	2184	26.906	72.04	0.806	562.31	43650	1.747	0.572	0.848	0.575272
847	ANKRD26_KAN624-9_3.tif:0011-0750	0.683	961.358	65	2967	124.277	85.16	0.932	656.377	50952	1.189	0.841	0.914	0.671507
848	ANKRD26_KAN624-9_3.tif:0012-0836	0.541	1463.19	46	3729	71.959	94.943	0.943	791.666	61454	1.167	0.857	1	0.809915
849	ANKRD26_KAN624-9_3.tif:0013-0847	0.605	1123.72	116	2546	18.784	96.206	0.985	680.376	52815	1.002	0.998	0.979	0.69606
850	ANKRD26_KAN624-9_3.tif:0014-0994	0.348	646.407	146	1174	34.271	112.838	0.967	224.834	17453	1.498	0.668	0.885	0.230017
851	ANKRD26_KAN624-9_3.tif:0015-1175	0.451	1097.23	169	2110	55.607	133.354	0.991	494.717	38403	1.065	0.939	0.986	0.506121
852	ANKRD26_KAN624-9_3.tif:0016-1178	0.399	914.065	269	1876	90.553	133.76	0.928	365.031	28336	1.415	0.707	0.939	0.373446
853	ANKRD26_KAN624-9_4.tif:0001-0095	0.528	8.171	0	30	98.802	10.867	1	4.316	335	1.009	0.991	0.932	0.00441503
854	ANKRD26_KAN624-9_4.tif:0002-0120	0.618	729.812	0	2363	35.433	13.634	0.899	451.278	35031	1.559	0.641	0.95	0.461681
855	ANKRD26_KAN624-9_4.tif:0003-0216	0.438	965.118	143	2219	74.797	24.516	1	422.718	32814	1.141	0.876	0.971	0.432462
856	ANKRD26_KAN624-9_4.tif:0004-0391	0.386	979.267	170	1677	142.329	44.435	0.976	378.455	29378	1.2	0.833	1	0.387179
857	ANKRD26_KAN624-9_4.tif:0005-0443	0.657	1107.8	1	2862	41.887	50.355	1	727.821	56498	1.194	0.837	0.962	0.744599
858	ANKRD26_KAN624-9_4.tif:0006-0510	0.786	852.197	112	2285	84.276	57.949	0.913	669.671	51984	1.571	0.637	0.897	0.685108
859	ANKRD26_KAN624-9_4.tif:0007-0688	0.451	1003.11	75	2664	106.919	78.132	0.917	452.283	35109	1.472	0.679	0.909	0.462709
860	ANKRD26_KAN624-9_4.tif:0008-0801	0.631	757.184	85	1521	3.1	90.896	0.918	477.957	37102	1.528	0.654	0.951	0.488975
861	ANKRD26_KAN624-9_4.tif:0009-0814	0.605	1194.55	135	2625	44.534	92.434	0.94	723.261	56144	1.09	0.917	0.979	0.739933
862	ANKRD26_KAN624-9_4.tif:0010-0820	0.219	704.588	149	1365	102.995	93.08	1	154.304	11978	1.497	0.668	0.919	0.15786
863	ANKRD26_KAN624-9_4.tif:0011-0871	0.786	717.377	0	1947	122.475	98.93	0.877	563.727	43760	1.213	0.824	0.884	0.576722
864	ANKRD26_KAN624-9_4.tif:0012-0952	0.232	146.722	39	228	86.96	108.09	0.996	34.022	2641	1.372	0.729	0.947	0.0348063
865	ANKRD26_KAN624-9_4.tif:0013-0986	0.438	982.588	360	1834	120.197	111.911	1	430.37	33408	1.141	0.876	0.971	0.440291
866	ANKRD26_KAN624-9_4.tif:0014-1080	0.386	1157.57	270	2351	50.791	122.58	0.976	447.362	34727	1.2	0.833	1	0.457674
										35587.5				0.469015
1	ANKRD26_KAN624-10_1.tif:0001-0022	0.67	1212.02	373	2764	106.747	2.484	0.974	811.904	63025	1.176	0.85	0.963	0.830619
2	ANKRD26_KAN624-10_1.tif:0002-0123	0.502	940.846	343	1601	69.981	13.947	0.858	472.688	36693	1.377	0.726	0.897	0.483584
3	ANKRD26_KAN624-10_1.tif:0003-0130	0.902	1482.84	0	5454	57.129	14.753	0.897	1337.16	103799	1.326	0.754	0.94	1.36799
4	ANKRD26_KAN624-10_1.tif:0004-0131	0.773	1202.97	41	4838	122.37	14.957	0.914	929.815	72178	1.159	0.862	0.923	0.951248
5	ANKRD26_KAN624-10_1.tif:0005-0339	0.593	1174.3	127	2595	61.82	38.553	0.964	695.873	54018	1.136	0.88	0.979	0.711914
6	ANKRD26_KAN624-10_1.tif:0006-0372	0.76	1734.76	93	4907	76.379	42.227	0.994	1318.51	102351	1.034	0.967	0.959	1.3489
7	ANKRD26_KAN624-10_1.tif:0007-0385	0.464	1149	411	2184	4.654	43.698	0.965	532.861	41364	1	1	1	0.545145
8	ANKRD26_KAN624-10_1.tif:0008-0400	0.67	1300.38	206	3034	109.231	45.402	0.974	871.098	67620	1.179	0.848	0.963	0.891178
9	ANKRD26_KAN624-10_1.tif:0009-0446	0.58	1116.93	154	2393	130.809	50.678	0.943	647.488	50262	1.2	0.833	0.957	0.662413
10	ANKRD26_KAN624-10_1.tif:0010-0476	0.386	1113.13	410	1891	59.02	54.083	0.976	430.19	33394	1.2	0.833	1	0.440106
11	ANKRD26_KAN624-10_1.tif:0011-0682	0.232	102.778	10	345	123.318	77.407	1	23.832	1850	1.362	0.734	0.947	0.0243815
12	ANKRD26_KAN624-10_1.tif:0012-0780	0.515	1144.67	287	2661	4.029	88.53	0.994	589.84	45787	1.209	0.827	0.976	0.603436
13	ANKRD26_KAN624-10_1.tif:0013-0816	0.283	219.636	70	352	35.345	92.662	1	62.247	4832	1.101	0.908	0.936	0.0636819
14	ANKRD26_KAN624-10_1.tif:0014-0854	0.515	1313.85	238	2962	43.13	96.986	0.994	677.014	52554	1.209	0.827	0.976	0.69262
15	ANKRD26_KAN624-10_1.tif:0015-0937	0.683	1594.83	160	4776	126.22	106.413	0.993	1088.88	84526	1.148	0.871	0.972	1.11399
16	ANKRD26_KAN624-10_1.tif:0016-0999	0.683	1008.02	36	2800	16.964	113.413	0.893	688.234	53425	1.421	0.704	0.922	0.704099
17	ANKRD26_KAN624-10_1.tif:0017-1026	0.502	119.077	0	708	102.498	116.499	1	59.825	4644	1.174	0.852	0.963	0.0612042
18	ANKRD26_KAN624-10_1.tif:0018-1031	0.515	1355.22	245	2839	4.143	117.019	0.994	698.334	54209	1.209	0.827	0.976	0.714431
19	ANKRD26_KAN624-10_1.tif:0019-1032	0.747	1393.03	145	4611	90.252	117.107	0.96	1040.83	80796	1.121	0.892	0.906	1.06483
20	ANKRD26_KAN624-10_1.tif:0020-1177	0.515	1188.67	223	2555	66.071	133.66	0.944	612.512	47547	1.215	0.823	0.976	0.626632
21	ANKRD26_KAN624-10_1.tif:0021-1187	0.322	1274.28	245	2368	3.008	134.781	1	410.39	31857	1	1	1	0.41985
22	ANKRD26_KAN624-10_1.tif:0022-1207	0.593	1196.37	218	2914	110.107	136.995	0.964	708.949	55033	1.33	0.752	0.979	0.725291
23	ANKRD26_KAN624-10_3.tif:0001-0012	0.322	981.48	482	1398	130.468	1.419	1	316.092	24537	1	1	1	0.323378
24	ANKRD26_KAN624-10_3.tif:0002-0166	0.322	957.28	466	1326	124.453	18.898	1	308.298	23932	1	1	1	0.315405
25	ANKRD26_KAN624-10_3.tif:0003-0193	0.824	1532.56	0	4653	93.664	21.856	0.921	1263.54	98084	1.197	0.835	0.908	1.29267
26	ANKRD26_KAN624-10_3.tif:0004-0255	0.618	1213.02	335	2245	16.181	29.006	0.96	750.069	58225	1.049	0.953	0.99	0.767359
27	ANKRD26_KAN624-10_3.tif:0005-0271	0.76	1332.86	122	5200	24.632	30.817	0.976	1013.05	78639	1.174	0.852	0.908	1.0364
28	ANKRD26_KAN624-10_3.tif:0006-0372	0.863	1820.19	31	5509	54.837	42.274	0.98	1571.03	121953	1.162	0.86	0.971	1.60724
29	ANKRD26_KAN624-10_3.tif:0007-0382	1.095	1158.88	0	4125	97.536	43.326	0.781	1268.97	98505	1.603	0.624	0.859	1.29822
30	ANKRD26_KAN624-10_3.tif:0008-0427	0.528	1292.15	252	2856	11.003	48.513	0.968	682.476	52978	1.176	0.85	0.988	0.698208
31	ANKRD26_KAN624-10_3.tif:0009-0445	0.515	1181.88	272	2481	24.246	50.522	0.944	609.008	47275	1.215	0.823	0.976	0.623047
32	ANKRD26_KAN624-10_3.tif:0010-0513	0.386	1016.53	423	1385	84.217	58.282	0.976	392.857	30496	1.2	0.833	1	0.401913
33	ANKRD26_KAN624-10_3.tif:0011-0544	0.206	138	59	196	99.767	61.744	1	28.444	2208	1	1	1	0.0290997
34	ANKRD26_KAN624-10_3.tif:0012-0566	0.515	1447.62	87	3740	49.827	64.298	0.994	745.947	57905	1.209	0.827	0.976	0.763142
35	ANKRD26_KAN624-10_3.tif:0013-0829	1.314	977.627	0	3106	119.669	94.105	0.764	1284.59	99718	2.018	0.495	0.876	1.3142
36	ANKRD26_KAN624-10_3.tif:0014-0830	0.799	1145.02	0	3483	93.963	94.278	0.907	914.524	70991	1.283	0.779	0.939	0.935605
37	ANKRD26_KAN624-10_3.tif:0015-0833	0.67	1583.92	199	4857	69.632	94.559	0.974	1061.03	82364	1.176	0.85	0.963	1.08549
38	ANKRD26_KAN624-10_3.tif:0016-0898	0.593	1304.43	225	3340	24.857	101.935	0.964	772.987	60004	1.33	0.752	0.979	0.790805
39	ANKRD26_KAN624-10_3.tif:0017-0917	0.58	1356.93	139	3568	8.103	104.124	0.99	786.616	61062	1.202	0.832	0.968	0.804748
40	ANKRD26_KAN624-10_3.tif:0018-0929	0.683	1476.19	81	4138	143.245	105.494	0.949	1007.88	78238	1.185	0.844	0.972	1.03111
41	ANKRD26_KAN624-10_3.tif:0019-1037	0.567	1459.16	163	4107	107.99	117.764	0.968	827.079	64203	1.255	0.797	0.957	0.846144
42	ANKRD26_KAN624-10_3.tif:0020-1116	0.451	1087.63	264	2050	57.326	126.658	0.991	490.389	38067	1.065	0.939	0.986	0.501693
43	ANKRD26_KAN624-10_4.tif:0001-0026	0.58	1085.04	223	2902	69.758	2.995	0.99	629.002	48827	1.202	0.832	0.968	0.643501
44	ANKRD26_KAN624-10_4.tif:0002-0083	0.464	1200.69	195	2389	3.065	9.421	0.965	556.835	43225	1	1	1	0.569671
45	ANKRD26_KAN624-10_4.tif:0003-0208	0.824	1120.16	29	3752	64.75	23.702	0.885	923.529	71690	1.418	0.705	0.901	0.944817
46	ANKRD26_KAN624-10_4.tif:0004-0234	1.005	1108.78	0	3920	99.646	26.569	0.801	1114.12	86485	1.638	0.611	0.862	1.1398
47	ANKRD26_KAN624-10_4.tif:0005-0257	0.683	1329.23	273	2970	31.886	29.22	0.993	907.542	70449	1.148	0.871	0.972	0.928462
48	ANKRD26_KAN624-10_4.tif:0006-0349	0.773	1484.02	1	3604	1.489	39.613	0.969	1147.05	89041	1.075	0.931	0.968	1.17349
49	ANKRD26_KAN624-10_4.tif:0007-0388	0.734	1345.26	58	4786	75.451	44.043	1	987.811	76680	1.109	0.902	0.95	1.01058
50	ANKRD26_KAN624-10_4.tif:0008-0440	0.554	1414.61	374	3923	43.187	49.997	0.994	783.602	60828	1.319	0.758	0.956	0.801665
51	ANKRD26_KAN624-10_4.tif:0009-0464	0.58	1438.49	264	3761	18.091	52.733	0.99	833.894	64732	1.202	0.832	0.968	0.853116
52	ANKRD26_KAN624-10_4.tif:0010-0476	0.657	1507.77	178	4223	143.685	54.101	1	990.594	76896	1.194	0.837	0.962	1.01343
53	ANKRD26_KAN624-10_4.tif:0011-0576	0.786	1412.31	48	4360	95.544	65.412	1	1109.82	86151	1.137	0.879	0.938	1.1354
54	ANKRD26_KAN624-10_4.tif:0012-0778	0.773	1211.57	21	3619	61.29	88.369	0.877	936.462	72694	1.182	0.846	0.916	0.958049
55	ANKRD26_KAN624-10_4.tif:0013-0789	0.245	297.053	160	427	77.111	89.56	1	72.707	5644	1.273	0.785	0.974	0.0743834
56	ANKRD26_KAN624-10_4.tif:0014-0837	0.644	1392.6	217	4153	21.452	95.068	0.981	896.991	69630	1.237	0.808	0.952	0.917668
57	ANKRD26_KAN624-10_4.tif:0015-0884	0.155	1181.92	327	1942	0.454	100.334	0.809	182.709	14183	3	0.333	1	0.186921
58	ANKRD26_KAN624-10_4.tif:0016-0891	0.889	1310.84	38	3815	83.637	101.111	0.993	1165.17	90448	1.321	0.757	0.952	1.19203
59	ANKRD26_KAN624-10_4.tif:0017-0897	0.451	1084.77	357	1849	105.725	101.866	0.938	489.1	37967	1.4	0.714	1	0.500375
60	ANKRD26_KAN624-10_4.tif:0018-1029	0.657	1550.84	41	4204	138.462	116.855	0.955	1018.9	79093	1.215	0.823	0.953	1.04238
61	ANKRD26_KAN624-10_4.tif:0019-1057	0.322	1074.68	481	1710	2.554	120.026	1	346.107	26867	1	1	1	0.354086
62	ANKRD26_KAN624-10_4.tif:0020-1222	0.58	1206.6	109	3166	83.789	138.769	0.9	699.468	54297	1.144	0.874	0.957	0.715591
										58338.3				0.768852
63	ANKRD26_KAN624-11_1.tif:0001-0074	0.773	1222.92	174	2838	92.09	8.333	0.877	945.235	73375	1.444	0.693	0.945	0.967024
64	ANKRD26_KAN624-11_1.tif:0002-0080	0.799	907.532	0	1807	33.828	9.115	0.872	724.846	56267	1.246	0.803	0.947	0.741554
65	ANKRD26_KAN624-11_1.tif:0003-0121	0.515	995.425	456	1898	139.946	13.79	0.994	512.933	39817	1.209	0.827	0.976	0.524756
66	ANKRD26_KAN624-11_1.tif:0004-0161	0.515	1379.28	210	3401	139.492	18.33	0.994	710.727	55171	1.209	0.827	0.976	0.72711
67	ANKRD26_KAN624-11_1.tif:0005-0200	0.915	1637.63	127	5291	18.391	22.666	0.864	1497.85	116272	1.391	0.719	0.91	1.53237
68	ANKRD26_KAN624-11_1.tif:0006-0259	0.67	1520.73	152	4478	64.128	29.453	0.932	1018.7	79078	1.508	0.663	0.981	1.04218
69	ANKRD26_KAN624-11_1.tif:0007-0322	0.605	1157.34	208	2236	98.787	36.604	0.985	700.73	54395	1.002	0.998	0.979	0.716883
70	ANKRD26_KAN624-11_1.tif:0008-0409	0.528	1385.05	138	3255	31.828	46.415	0.968	731.544	56787	1.176	0.85	0.988	0.748407
71	ANKRD26_KAN624-11_1.tif:0009-0435	0.67	1150.06	235	2612	99.893	49.429	0.974	770.397	59803	1.176	0.85	0.963	0.788156
72	ANKRD26_KAN624-11_1.tif:0010-0449	0.67	1438.62	222	3802	119.9	50.964	0.974	963.696	74808	1.179	0.848	0.963	0.98591
73	ANKRD26_KAN624-11_1.tif:0011-0584	0.451	1414.91	229	3572	58.898	66.292	0.991	637.955	49522	1.065	0.939	0.986	0.65266
74	ANKRD26_KAN624-11_1.tif:0012-0590	0.193	86	0	161	58.237	66.954	1	16.618	1290	1.137	0.88	0.968	0.0170012
75	ANKRD26_KAN624-11_1.tif:0013-0606	0.528	1249.88	295	2654	13.273	68.846	0.968	660.151	51245	1.176	0.85	0.988	0.675368
76	ANKRD26_KAN624-11_1.tif:0014-0697	0.67	1535.56	18	4131	141.535	79.166	0.932	1028.63	79849	1.508	0.663	0.981	1.05235
77	ANKRD26_KAN624-11_1.tif:0015-0699	0.747	1174.31	57	3613	104.798	79.309	0.898	877.41	68110	1.19	0.84	0.967	0.897635
78	ANKRD26_KAN624-11_1.tif:0016-0806	0.979	900.171	0	3641	84.879	91.527	0.708	881.314	68413	2.268	0.441	0.894	0.901629
79	ANKRD26_KAN624-11_1.tif:0017-0941	0.58	1223.93	189	3068	97.377	106.81	0.99	709.516	55077	1.388	0.72	0.968	0.725871
80	ANKRD26_KAN624-11_1.tif:0018-0955	0.515	1345.25	182	3476	27.595	108.435	0.944	693.194	53810	1.215	0.823	0.976	0.709173
81	ANKRD26_KAN624-11_1.tif:0019-0998	0.554	1118.3	223	2989	39.782	113.33	0.994	619.469	48087	1.319	0.758	0.956	0.633748
82	ANKRD26_KAN624-11_1.tif:0020-1061	0.515	1294.47	200	2940	124.396	120.48	0.994	667.03	51779	1.209	0.827	0.976	0.682406
83	ANKRD26_KAN624-11_1.tif:0021-1073	0.618	1127.1	67	2195	141.13	121.849	0.96	696.943	54101	1.049	0.953	0.99	0.713008
84	ANKRD26_KAN624-11_1.tif:0022-1128	0.386	961.367	344	1685	119.856	128.085	0.976	371.537	28841	1.2	0.833	1	0.380101
85	ANKRD26_KAN624-11_1.tif:0023-1202	0.915	896.169	51	2932	97.261	136.404	0.765	819.672	63628	1.671	0.599	0.877	0.838566
86	ANKRD26_KAN624-11_1.tif:0024-1243	0.386	1340.17	446	2353	55.956	141.137	0.976	517.931	40205	1.2	0.833	1	0.52987
87	ANKRD26_KAN624-11_2.tif:0001-0017	0.322	917.32	507	1286	104.59	1.986	1	295.429	22933	1	1	1	0.302239
88	ANKRD26_KAN624-11_2.tif:0002-0023	0.322	1517.12	223	2888	11.407	2.667	1	488.598	37928	1	1	1	0.499861
89	ANKRD26_KAN624-11_2.tif:0003-0220	0.863	1361.46	61	4069	16.729	25	0.892	1175.09	91218	1.64	0.61	0.95	1.20218
90	ANKRD26_KAN624-11_2.tif:0004-0244	0.76	1194.58	340	2126	46.44	27.676	0.994	907.941	70480	1.024	0.976	0.967	0.92887
91	ANKRD26_KAN624-11_2.tif:0005-0306	0.515	1291.95	175	3322	121.786	34.788	0.994	665.729	51678	1.209	0.827	0.976	0.681075
92	ANKRD26_KAN624-11_2.tif:0006-0399	0.657	1536.04	157	4353	111.578	45.35	1	1009.17	78338	1.215	0.823	0.953	1.03243
93	ANKRD26_KAN624-11_2.tif:0007-0507	0.605	1434.34	122	3610	3.867	57.551	0.94	868.444	67414	1.336	0.748	0.989	0.888463
94	ANKRD26_KAN624-11_2.tif:0008-0546	0.322	1273.84	267	2797	50.905	62.028	1	410.248	31846	1	1	1	0.419705
95	ANKRD26_KAN624-11_2.tif:0009-0560	0.605	1535.38	182	4024	82.067	63.552	0.94	929.622	72163	1.336	0.748	0.989	0.951051
96	ANKRD26_KAN624-11_2.tif:0010-0578	0.928	1232.96	12	4333	104.125	65.622	0.909	1143.6	88773	1.359	0.736	0.917	1.16996
97	ANKRD26_KAN624-11_2.tif:0011-0687	0.786	83.672	0	413	144.537	77.962	0.812	65.751	5104	1.158	0.863	0.897	0.0672666
98	ANKRD26_KAN624-11_2.tif:0012-0703	0.76	1546.27	140	3778	63.919	79.795	0.994	1175.25	91230	1.112	0.899	0.967	1.20234
99	ANKRD26_KAN624-11_2.tif:0013-0740	0.67	1527.08	110	3809	8.002	83.977	0.974	1022.95	79408	1.176	0.85	0.963	1.04653
100	ANKRD26_KAN624-11_2.tif:0014-0880	0.438	1173.88	173	2336	127.12	99.88	1	514.156	39912	1.141	0.876	0.971	0.526008
101	ANKRD26_KAN624-11_2.tif:0015-0898	0.824	1140.97	0	3486	114.568	101.909	0.958	940.688	73022	1.238	0.808	0.914	0.962372
102	ANKRD26_KAN624-11_2.tif:0016-0934	0.928	1040.53	21	3277	136.739	106.042	0.776	965.113	74918	1.662	0.602	0.867	0.987359
103	ANKRD26_KAN624-11_2.tif:0017-0939	0.386	1396.33	174	3029	70.2	106.577	0.976	539.638	41890	1.2	0.833	1	0.552077
104	ANKRD26_KAN624-11_2.tif:0018-0951	0.515	1151.72	86	2706	45.982	108.009	0.944	593.472	46069	1.215	0.823	0.976	0.607153
105	ANKRD26_KAN624-11_2.tif:0019-1019	0.618	1260.92	333	2438	110.272	115.706	0.96	779.685	60524	1.049	0.953	0.99	0.797658
106	ANKRD26_KAN624-11_2.tif:0020-1185	0.451	1243.31	146	2660	106.747	134.554	0.938	560.584	43516	1.4	0.714	1	0.573506
107	ANKRD26_KAN624-11_2.tif:0021-1259	0.515	1163	113	2603	87.622	142.953	0.994	599.282	46520	1.209	0.827	0.976	0.613096
108	ANKRD26_KAN624-11_3.tif:0001-0087	0.322	1155.68	404	1915	49.316	9.931	1	372.194	28892	1	1	1	0.380774
109	ANKRD26_KAN624-11_3.tif:0002-0176	0.683	1296.53	203	3443	122.472	20.013	0.949	885.217	68716	1.162	0.861	0.972	0.905622
110	ANKRD26_KAN624-11_3.tif:0003-0225	0.605	1387.15	116	4304	13.372	25.587	0.88	839.871	65196	1.188	0.842	0.913	0.859231
111	ANKRD26_KAN624-11_3.tif:0004-0330	0.206	442.688	191	651	140.286	37.455	1	91.245	7083	1	1	1	0.0933483
112	ANKRD26_KAN624-11_3.tif:0005-0335	0.966	1172.76	43	4105	60.339	38.15	0.781	1133.08	87957	1.33	0.752	0.882	1.1592
113	ANKRD26_KAN624-11_3.tif:0006-0601	0.618	1534.85	196	3613	32.348	68.214	0.916	949.074	73673	1.333	0.75	1	0.970951
114	ANKRD26_KAN624-11_3.tif:0007-0666	0.696	1509.48	43	4970	113.401	75.646	0.95	1050.06	81512	1.318	0.759	0.923	1.07426
115	ANKRD26_KAN624-11_3.tif:0008-0834	0.515	1488.35	166	3525	54.026	94.716	0.994	766.932	59534	1.209	0.827	0.976	0.784611
116	ANKRD26_KAN624-11_3.tif:0009-0878	0.593	1402.11	119	3495	134.853	99.665	0.92	830.867	64497	1.363	0.734	0.979	0.850019
117	ANKRD26_KAN624-11_3.tif:0010-0945	0.605	1116.89	255	2342	98.114	107.322	0.922	676.241	52494	1.197	0.836	0.913	0.691829
118	ANKRD26_KAN624-11_3.tif:0011-1048	0.515	1699.47	155	4094	61.744	119.005	0.994	875.723	67979	1.209	0.827	0.976	0.895909
119	ANKRD26_KAN624-11_3.tif:0012-1080	0.438	1255.35	263	2503	40.179	122.58	1	549.84	42682	1.141	0.876	0.971	0.562515
120	ANKRD26_KAN624-11_3.tif:0013-1127	0.657	1171.29	243	2695	125.764	127.965	0.955	769.534	59736	1.259	0.794	0.962	0.787273
121	ANKRD26_KAN624-11_4.tif:0001-0018	0.657	1147.43	164	3118	6.577	2.106	1	753.857	58519	1.157	0.864	0.953	0.771234
122	ANKRD26_KAN624-11_4.tif:0002-0093	0.593	1550.96	228	4006	108.896	10.607	0.964	919.071	71344	1.15	0.87	0.968	0.940257
123	ANKRD26_KAN624-11_4.tif:0003-0207	0.67	1092.33	151	2517	14.875	23.545	0.956	731.725	56801	1.073	0.932	0.897	0.748592
124	ANKRD26_KAN624-11_4.tif:0004-0226	0.567	1215.82	137	2969	134.32	25.713	0.968	689.149	53496	1.255	0.797	0.957	0.705035
125	ANKRD26_KAN624-11_4.tif:0005-0285	0.309	358.25	0	739	56.797	32.414	1	110.762	8598	1.091	0.916	0.98	0.113315
126	ANKRD26_KAN624-11_4.tif:0006-0403	0.876	967.632	18	3507	80.218	45.791	0.905	847.639	65799	1.591	0.628	0.944	0.867178
127	ANKRD26_KAN624-11_4.tif:0007-0468	0.67	1602.79	56	4388	62.696	53.12	0.974	1073.67	83345	1.179	0.848	0.963	1.09842
128	ANKRD26_KAN624-11_4.tif:0008-0609	0.683	1240.57	0	2740	95.219	69.172	0.993	847.008	65750	1.148	0.871	0.972	0.866533
129	ANKRD26_KAN624-11_4.tif:0009-0726	0.193	637.333	384	813	109.062	82.412	1	123.154	9560	1.137	0.88	0.968	0.125993
130	ANKRD26_KAN624-11_4.tif:0010-0759	0.683	1469.15	71	4206	22.365	86.197	0.949	1003.08	77865	1.208	0.828	0.972	1.0262
131	ANKRD26_KAN624-11_4.tif:0011-0822	0.605	1274.79	211	2821	48.521	93.354	0.985	771.84	59915	1.104	0.906	0.979	0.789632
132	ANKRD26_KAN624-11_4.tif:0012-0895	1.005	1298	40	4865	111.076	101.571	0.841	1304.25	101244	1.533	0.652	0.912	1.33432
133	ANKRD26_KAN624-11_4.tif:0013-1030	0.644	1236.34	124	2994	88.8	116.921	0.981	796.342	61817	1.133	0.883	0.943	0.814699
134	ANKRD26_KAN624-11_4.tif:0014-1074	0.786	1197.77	0	3681	131.507	121.941	0.691	941.229	73064	1.464	0.683	0.819	0.962925
135	ANKRD26_KAN624-11_4.tif:0015-1155	0.515	1198.35	142	2628	12.485	131.149	0.994	617.498	47934	1.209	0.827	0.976	0.631732
										57005.2				0.751283
136	ANKRD26_KAN624-12_1.tif:0001-0088	0.747	1019	0	2446	74.57	10.041	0.92	761.367	59102	1.19	0.84	0.906	0.778917
137	ANKRD26_KAN624-12_1.tif:0002-0184	1.134	1024.95	0	4936	45.599	20.881	0.809	1161.93	90196	1.766	0.566	0.88	1.18871
138	ANKRD26_KAN624-12_1.tif:0003-0198	0.863	1025.33	28	4148	80.259	22.55	0.892	884.972	68697	1.656	0.604	0.937	0.905372
139	ANKRD26_KAN624-12_1.tif:0004-0243	0.271	381.143	83	713	15.931	27.637	1	103.11	8004	1.182	0.846	0.913	0.105486
140	ANKRD26_KAN624-12_1.tif:0005-0369	0.245	591.053	230	1193	130.683	41.89	1	144.668	11230	1.273	0.785	0.974	0.148002
141	ANKRD26_KAN624-12_1.tif:0006-0493	0.863	1418.52	49	4171	112.757	55.95	0.98	1224.34	95041	1.135	0.881	0.964	1.25256
142	ANKRD26_KAN624-12_1.tif:0007-0542	0.386	632.533	97	1094	49.49	61.502	1	244.454	18976	1.004	0.996	0.909	0.250089
143	ANKRD26_KAN624-12_1.tif:0008-0621	0.58	958.089	116	1945	20.209	70.482	0.925	555.405	43114	1.517	0.659	0.909	0.568208
144	ANKRD26_KAN624-12_1.tif:0009-0651	0.966	1192.52	0	5279	30.682	73.971	0.912	1152.18	89439	1.233	0.811	0.92	1.17873
145	ANKRD26_KAN624-12_1.tif:0010-0701	0.94	785.274	0	2936	12.543	79.675	0.844	738.475	57325	1.452	0.689	0.88	0.755498
146	ANKRD26_KAN624-12_1.tif:0011-0807	0.837	1096.12	311	2266	64.858	91.611	0.99	917.835	71248	1.136	0.88	0.956	0.938992
147	ANKRD26_KAN624-12_1.tif:0012-0875	0.953	1090.58	47	2814	10.008	99.336	0.9	1039.64	80703	1.439	0.695	0.919	1.0636
148	ANKRD26_KAN624-12_1.tif:0013-1053	0.747	1076.78	38	2135	136.147	119.537	0.936	804.535	62453	1.279	0.782	0.967	0.823081
149	ANKRD26_KAN624-12_1.tif:0014-1109	0.657	970.843	274	1635	112.371	125.922	1	637.839	49513	1.157	0.864	0.953	0.652542
150	ANKRD26_KAN624-12_1.tif:0015-1251	0.747	806.241	0	3090	25.913	141.945	0.68	602.4	46762	1.929	0.518	0.806	0.616286
151	ANKRD26_KAN624-12_1.tif:0016-1270	0.528	1261.78	190	3044	131.254	144.152	0.968	666.438	51733	1.176	0.85	0.988	0.6818
152	ANKRD26_KAN624-12_2.tif:0001-0106	0.915	1376.34	26	5287	31.124	12.072	0.945	1258.85	97720	1.253	0.798	0.94	1.28787
153	ANKRD26_KAN624-12_2.tif:0002-0236	0.593	1288.46	207	2984	76.272	26.786	0.964	763.518	59269	1.351	0.74	0.979	0.781118
154	ANKRD26_KAN624-12_2.tif:0003-0240	0.657	1398.1	217	3865	132.051	27.248	0.955	918.543	71303	1.215	0.823	0.953	0.939717
155	ANKRD26_KAN624-12_2.tif:0004-0294	0.773	1059	78	2635	106.192	33.36	0.83	818.538	63540	1.459	0.685	0.876	0.837407
156	ANKRD26_KAN624-12_2.tif:0005-0369	0.528	1315.54	370	2660	48.967	41.888	0.968	694.83	53937	1.176	0.85	0.988	0.710847
157	ANKRD26_KAN624-12_2.tif:0006-0583	0.786	1057.1	152	2025	134.063	66.166	0.945	830.686	64483	1.033	0.968	0.976	0.849834
158	ANKRD26_KAN624-12_2.tif:0007-0636	0.992	1104.16	12	4560	89.655	72.249	0.859	1095.25	85020	1.41	0.709	0.895	1.1205
159	ANKRD26_KAN624-12_2.tif:0008-0672	0.58	1128.51	249	2095	50.098	76.316	0.99	654.199	50783	1.202	0.832	0.968	0.669279
160	ANKRD26_KAN624-12_2.tif:0009-0769	0.361	856.036	17	2534	0.608	87.265	0.967	308.775	23969	1.274	0.785	0.966	0.315892
161	ANKRD26_KAN624-12_2.tif:0010-0813	0.85	1293.65	68	4075	32.657	92.337	0.949	1099.9	85381	1.231	0.812	0.91	1.12525
162	ANKRD26_KAN624-12_2.tif:0011-0931	0.837	1294.85	131	3903	66.032	105.662	0.99	1084.23	84165	1.119	0.894	0.963	1.10923
163	ANKRD26_KAN624-12_2.tif:0012-0974	0.631	1243.12	136	3853	4.597	110.555	0.901	784.697	60913	1.386	0.721	0.891	0.802785
164	ANKRD26_KAN624-12_2.tif:0013-1048	0.386	995.367	436	1603	44.038	119.005	0.976	384.677	29861	1.2	0.833	1	0.393544
165	ANKRD26_KAN624-12_2.tif:0014-1182	0.567	1033.18	42	3431	70.257	134.149	0.904	585.627	45460	1.541	0.649	0.907	0.599127
166	ANKRD26_KAN624-12_2.tif:0015-1217	0.515	1130.83	132	2563	27.112	138.172	0.944	582.703	45233	1.215	0.823	0.976	0.596135
167	ANKRD26_KAN624-12_3.tif:0001-0086	0.773	1221.37	0	3535	53.192	9.822	0.914	944.037	73282	1.16	0.862	0.923	0.965798
168	ANKRD26_KAN624-12_3.tif:0002-0113	0.528	1009.2	357	1521	75.543	12.832	0.968	533.029	41377	1.176	0.85	0.988	0.545316
169	ANKRD26_KAN624-12_3.tif:0003-0123	0.915	1305.24	0	5182	31.579	13.993	0.882	1193.82	92672	1.645	0.608	0.893	1.22134
170	ANKRD26_KAN624-12_3.tif:0004-0341	0.605	1290.81	315	2799	91.523	38.76	0.985	781.54	60668	1.002	0.998	0.979	0.799556
171	ANKRD26_KAN624-12_3.tif:0005-0547	1.121	785.253	0	3586	38.148	62.141	0.785	880.077	68317	1.844	0.542	0.926	0.900364
172	ANKRD26_KAN624-12_3.tif:0006-0562	0.322	971.76	483	1358	43.981	63.844	1	312.961	24294	1	1	1	0.320176
173	ANKRD26_KAN624-12_3.tif:0007-0655	0.593	1145.67	157	2925	137.283	74.392	0.964	678.908	52701	1.15	0.87	0.968	0.694557
174	ANKRD26_KAN624-12_3.tif:0008-0739	0.979	680.145	0	1875	53.075	83.902	0.677	665.896	51691	1.968	0.508	0.788	0.681246
175	ANKRD26_KAN624-12_3.tif:0009-0767	0.515	953.025	402	1722	73.605	87.055	0.994	491.084	38121	1.209	0.827	0.976	0.502404
176	ANKRD26_KAN624-12_3.tif:0010-0832	0.386	224.467	0	504	25.084	94.432	1	86.749	6734	1.122	0.891	0.909	0.0887487
177	ANKRD26_KAN624-12_3.tif:0011-0894	0.515	1096.88	368	2296	10.896	101.526	0.994	565.209	43875	1.209	0.827	0.976	0.578237
178	ANKRD26_KAN624-12_3.tif:0012-0975	0.49	858.316	306	1322	38.309	110.677	1	420.168	32616	1.22	0.82	0.95	0.429853
179	ANKRD26_KAN624-12_3.tif:0013-0988	1.172	747.176	11	3271	80.488	112.13	0.786	875.903	67993	2.108	0.474	0.91	0.896093
180	ANKRD26_KAN624-12_3.tif:0014-1078	0.528	1188.34	241	2538	104.128	122.36	0.968	627.649	48722	1.176	0.85	0.988	0.642117
181	ANKRD26_KAN624-12_3.tif:0015-1083	0.193	27.733	0	90	103.41	122.909	1	5.359	416	1.137	0.88	0.968	0.00548255
182	ANKRD26_KAN624-12_3.tif:0016-1192	0.644	696.18	6	1663	108.361	135.362	0.842	448.418	34809	1.619	0.618	0.885	0.458755
183	ANKRD26_KAN624-12_4.tif:0001-0004	0.232	1476	372	2949	32.688	0.511	0.923	342.256	26568	2	0.5	1	0.350145
184	ANKRD26_KAN624-12_4.tif:0002-0025	0.786	1137.85	0	4155	72.955	2.928	0.929	894.144	69409	1.541	0.649	0.938	0.914755
185	ANKRD26_KAN624-12_4.tif:0003-0155	1.108	1172.22	0	4236	35.636	17.574	0.843	1298.67	100811	1.49	0.671	0.869	1.32861
186	ANKRD26_KAN624-12_4.tif:0004-0154	0.528	325.659	0	949	51.846	17.516	0.948	172.004	13352	1.479	0.676	0.953	0.175969
187	ANKRD26_KAN624-12_4.tif:0005-0156	0.58	1159.71	175	2877	71.524	17.725	0.9	672.286	52187	1.405	0.712	0.968	0.687783
188	ANKRD26_KAN624-12_4.tif:0006-0177	0.747	941.5	0	2886	142.399	20.193	0.784	703.461	54607	1.575	0.635	0.906	0.719677
189	ANKRD26_KAN624-12_4.tif:0007-0218	0.94	1051.11	21	3676	102.3	24.727	0.844	988.468	76731	1.25	0.8	0.859	1.01125
190	ANKRD26_KAN624-12_4.tif:0008-0268	0.709	1078.36	0	3288	87.493	30.417	0.888	764.046	59310	1.315	0.76	0.932	0.781658
191	ANKRD26_KAN624-12_4.tif:0009-0296	0.657	1431.63	167	4071	48.895	33.639	0.955	940.572	73013	1.096	0.912	0.953	0.962253
192	ANKRD26_KAN624-12_4.tif:0010-0312	0.837	978.785	0	3600	36.014	35.408	0.82	819.582	63621	1.611	0.621	0.872	0.838474
193	ANKRD26_KAN624-12_4.tif:0011-0397	0.425	1028.39	322	1663	0.676	45.085	1	437.185	33937	1.057	0.946	0.957	0.447263
194	ANKRD26_KAN624-12_4.tif:0012-0409	1.056	1232.85	0	6093	70.687	46.361	0.826	1302.32	101094	1.578	0.634	0.927	1.33234
195	ANKRD26_KAN624-12_4.tif:0013-0445	0.966	886.24	0	3240	126.033	50.449	0.82	856.258	66468	1.716	0.583	0.949	0.875995
196	ANKRD26_KAN624-12_4.tif:0014-0546	0.734	923.035	95	2052	105.598	61.966	0.82	677.774	52613	1.85	0.54	0.877	0.693397
197	ANKRD26_KAN624-12_4.tif:0015-0574	0.296	789.696	485	1203	94.474	65.225	1	233.98	18163	1.163	0.86	0.958	0.239374
198	ANKRD26_KAN624-12_4.tif:0016-0591	0.657	778.824	1	2454	49.77	67.122	0.809	511.683	39720	1.886	0.53	0.864	0.523478
199	ANKRD26_KAN624-12_4.tif:0017-0691	1.056	1092.18	20	4195	32.979	78.417	0.778	1153.72	89559	1.463	0.684	0.837	1.18032
200	ANKRD26_KAN624-12_4.tif:0018-0754	0.271	311.048	177	480	115.6	85.636	1	84.147	6532	1	1	0.913	0.0860865
201	ANKRD26_KAN624-12_4.tif:0019-0773	1.082	1215.63	0	4904	77.162	87.706	0.937	1315.44	102113	1.517	0.659	0.944	1.34577
202	ANKRD26_KAN624-12_4.tif:0020-0882	0.593	1561.72	232	3850	16.62	100.171	1	925.448	71839	1.052	0.95	0.968	0.946781
203	ANKRD26_KAN624-12_4.tif:0021-0905	0.58	1267.64	107	3039	1.129	102.699	0.943	734.855	57044	1.352	0.74	0.968	0.751794
204	ANKRD26_KAN624-12_4.tif:0022-0910	0.902	1137.26	0	3706	46.702	103.262	0.755	1025.53	79608	1.446	0.692	0.824	1.04917
205	ANKRD26_KAN624-12_4.tif:0023-0957	0.683	1358.3	114	3303	56.757	108.67	0.993	927.393	71990	1.148	0.871	0.972	0.948771
206	ANKRD26_KAN624-12_4.tif:0024-1174	0.49	1125.21	322	2201	69.546	133.306	0.944	550.819	42758	1.217	0.822	0.95	0.563516
207	ANKRD26_KAN624-12_4.tif:0025-1225	0.451	1057.23	154	2287	27.978	139.094	0.938	476.682	37003	1.4	0.714	1	0.48767
208	ANKRD26_KAN624-12_4.tif:0026-1274	0.438	1048.53	310	2208	142.102	144.599	1	459.252	35650	1.141	0.876	0.971	0.469839
209	ANKRD26_KAN624-12_5.tif:0001-0017	0.515	1047.67	251	2248	143.464	1.986	0.994	539.857	41907	1.209	0.827	0.976	0.552301
210	ANKRD26_KAN624-12_5.tif:0002-0049	0.322	1123.6	360	1927	116.054	5.618	1	361.862	28090	1	1	1	0.370204
211	ANKRD26_KAN624-12_5.tif:0003-0092	0.605	1390.04	41	3543	15.543	10.45	0.94	841.623	65332	1.336	0.748	0.989	0.861024
212	ANKRD26_KAN624-12_5.tif:0004-0199	0.515	248.375	0	821	92.69	22.626	0.973	127.985	9935	1.486	0.673	0.941	0.130935
213	ANKRD26_KAN624-12_5.tif:0005-0296	0.863	607.985	0	1929	88.602	33.621	0.786	524.759	40735	1.807	0.553	0.876	0.536855
214	ANKRD26_KAN624-12_5.tif:0006-0363	0.799	928.903	25	2838	53.748	41.29	0.928	741.915	57592	1.371	0.729	0.886	0.759017
215	ANKRD26_KAN624-12_5.tif:0007-0369	0.605	1256.38	82	3850	24.063	41.953	0.88	760.697	59050	1.286	0.778	0.913	0.778232
216	ANKRD26_KAN624-12_5.tif:0008-0385	0.58	1378.2	228	3617	22.315	43.742	0.99	798.944	62019	1.202	0.832	0.968	0.817361
217	ANKRD26_KAN624-12_5.tif:0009-0489	0.683	1284.28	0	3540	97.943	55.518	0.807	876.856	68067	1.612	0.62	0.883	0.897069
218	ANKRD26_KAN624-12_5.tif:0010-0624	0.915	772.056	33	1911	137.102	70.814	0.851	706.154	54816	1.692	0.591	0.877	0.722431
219	ANKRD26_KAN624-12_5.tif:0011-0642	0.451	1091.49	304	2079	59.823	72.859	0.991	492.128	38202	1.065	0.939	0.986	0.503472
220	ANKRD26_KAN624-12_5.tif:0012-0655	0.541	1563.6	315	3740	90.573	74.399	0.943	845.99	65671	1.167	0.857	1	0.865491
221	ANKRD26_KAN624-12_5.tif:0013-0660	1.211	984.17	0	4558	104.438	74.924	0.778	1191.76	92512	1.804	0.554	0.862	1.21923
222	ANKRD26_KAN624-12_5.tif:0014-0766	0.644	1517.82	211	4421	66.284	86.998	0.981	977.647	75891	1.317	0.759	0.962	1.00018
223	ANKRD26_KAN624-12_5.tif:0015-0795	0.773	1017.03	0	2833	127.392	90.236	0.877	786.101	61022	1.659	0.603	0.938	0.804221
224	ANKRD26_KAN624-12_5.tif:0016-0808	1.031	1155.74	0	4588	41.467	91.692	0.795	1191.08	92459	1.574	0.635	0.879	1.21854
225	ANKRD26_KAN624-12_5.tif:0017-0975	1.159	1127.07	0	5017	122.406	110.588	0.685	1306.72	101436	2.193	0.456	0.818	1.33685
226	ANKRD26_KAN624-12_5.tif:0018-0992	1.043	1046.31	0	3341	104.07	112.617	0.936	1091.78	84751	1.213	0.825	0.91	1.11695
227	ANKRD26_KAN624-12_5.tif:0019-0995	0.644	733.62	0	1762	85.806	112.887	0.807	472.534	36681	1.831	0.546	0.909	0.483426
228	ANKRD26_KAN624-12_5.tif:0020-1025	0.683	1529.85	33	4534	63.51	116.345	0.993	1044.52	81082	1.148	0.871	0.972	1.0686
229	ANKRD26_KAN624-12_5.tif:0021-1084	0.58	1004.36	286	1967	31.61	123.078	0.99	582.226	45196	1.096	0.912	0.957	0.595647
										56606.5				0.746028
230	ANKRD26_KAN624-13_1.tif:0001-0055	0.824	1529.33	237	3816	30.134	6.264	1	1260.88	97877	1.122	0.891	0.955	1.28994
231	ANKRD26_KAN624-13_1.tif:0002-0111	0.696	1310.37	134	3298	137.165	12.599	0.967	911.548	70760	1.172	0.853	0.982	0.93256
232	ANKRD26_KAN624-13_1.tif:0003-0131	0.67	1929.83	74	6642	41.993	14.923	0.932	1292.75	100351	1.228	0.814	0.963	1.32255
233	ANKRD26_KAN624-13_1.tif:0004-0248	0.605	1653.68	193	4825	64.184	28.205	0.985	1001.25	77723	1.104	0.906	0.979	1.02433
234	ANKRD26_KAN624-13_1.tif:0005-0388	0.541	1144.52	349	2019	10.215	44.095	0.943	619.25	48070	1.167	0.857	1	0.633524
235	ANKRD26_KAN624-13_1.tif:0006-0485	0.734	1420.3	195	3975	113.607	55.054	1	1042.91	80957	1.195	0.837	0.958	1.06695
236	ANKRD26_KAN624-13_1.tif:0007-0488	0.58	1338.13	212	2950	45.331	55.432	0.99	775.718	60216	1.202	0.832	0.968	0.793599
237	ANKRD26_KAN624-13_1.tif:0008-0521	0.515	1068.78	513	1764	124.112	59.134	0.994	550.729	42751	1.209	0.827	0.976	0.563424
238	ANKRD26_KAN624-13_1.tif:0009-0551	1.52	1077.91	0	4930	94.509	62.564	0.859	1638.55	127194	1.753	0.57	0.948	1.67632
239	ANKRD26_KAN624-13_1.tif:0010-0690	0.928	1328.29	96	4321	76.294	78.378	0.909	1232.02	95637	1.492	0.67	0.923	1.26042
240	ANKRD26_KAN624-13_1.tif:0011-0703	0.863	1249.52	0	4514	38	79.813	0.892	1078.48	83718	1.495	0.669	0.937	1.10334
241	ANKRD26_KAN624-13_1.tif:0012-0841	0.683	1571.04	154	4428	4.774	95.504	0.993	1072.64	83265	1.148	0.871	0.972	1.09737
242	ANKRD26_KAN624-13_1.tif:0013-0870	0.773	1964.77	21	5672	123.414	98.807	0.929	1518.64	117886	1.298	0.77	0.976	1.55364
243	ANKRD26_KAN624-13_1.tif:0014-0926	0.928	962.347	0	3151	25.299	105.133	0.75	892.598	69289	1.674	0.598	0.867	0.913174
244	ANKRD26_KAN624-13_1.tif:0015-0950	0.618	1187.69	208	2291	119.175	107.825	0.916	734.404	57009	1.333	0.75	1	0.751333
245	ANKRD26_KAN624-13_1.tif:0016-0955	0.605	1485.57	148	3333	62.32	108.399	0.94	899.465	69822	1.336	0.748	0.989	0.920198
246	ANKRD26_KAN624-13_1.tif:0017-0961	0.76	1424.1	239	3873	67.703	109.13	0.994	1082.39	84022	1.278	0.782	0.967	1.10734
247	ANKRD26_KAN624-13_1.tif:0018-1030	0.709	1560.13	0	4144	84.938	116.92	0.967	1105.39	85807	1.345	0.743	0.957	1.13087
248	ANKRD26_KAN624-13_1.tif:0019-1060	0.631	1254.1	157	3656	29.673	120.313	0.961	791.627	61451	1.368	0.731	0.951	0.809875
249	ANKRD26_KAN624-13_1.tif:0020-1065	0.605	1083.62	298	2152	68.449	120.884	0.94	656.093	50930	1.336	0.748	0.989	0.671217
250	ANKRD26_KAN624-13_1.tif:0021-1117	0.58	1320.8	180	3377	36.73	126.824	0.99	765.67	59436	1.202	0.832	0.968	0.783319
251	ANKRD26_KAN624-13_1.tif:0022-1168	0.451	1212	408	2394	133.468	132.576	0.991	546.465	42420	1.065	0.939	0.986	0.559062
252	ANKRD26_KAN624-13_1.tif:0023-1214	0.515	1138.58	309	2510	83.891	137.846	0.994	586.696	45543	1.166	0.857	0.976	0.60022
253	ANKRD26_KAN624-13_1.tif:0024-1224	0.438	1331.71	185	2723	115.77	138.924	1	583.283	45278	1.141	0.876	0.971	0.596728
254	ANKRD26_KAN624-13_2.tif:0001-0154	0.863	1778.15	63	6958	28.891	17.475	0.892	1534.74	119136	1.059	0.944	0.912	1.57012
255	ANKRD26_KAN624-13_2.tif:0002-0201	0.863	1389.81	117	5115	67.55	22.85	1	1199.56	93117	1.071	0.934	0.937	1.22721
256	ANKRD26_KAN624-13_2.tif:0003-0237	1.237	1151.31	0	4537	133.474	26.923	0.855	1423.82	110526	1.545	0.647	0.923	1.45664
257	ANKRD26_KAN624-13_2.tif:0004-0328	0.786	1333.61	178	4097	93.88	37.315	0.968	1047.97	81350	1.173	0.853	0.931	1.07213
258	ANKRD26_KAN624-13_2.tif:0005-0528	0.644	1450.92	123	4809	34.334	59.928	0.981	934.556	72546	1.317	0.759	0.962	0.956098
259	ANKRD26_KAN624-13_2.tif:0006-0535	0.593	1790.41	131	4478	53.861	60.787	0.964	1060.97	82359	1.15	0.87	0.968	1.08543
260	ANKRD26_KAN624-13_2.tif:0007-0548	1.108	1117.74	0	5414	76.313	62.209	0.867	1238.32	96126	1.551	0.645	0.95	1.26686
261	ANKRD26_KAN624-13_2.tif:0008-0562	0.593	1212.78	463	2288	4.93	63.851	1	718.675	55788	1.052	0.95	0.968	0.735241
262	ANKRD26_KAN624-13_2.tif:0009-0645	0.966	1006.37	94	2677	101.887	73.181	0.88	972.327	75478	1.774	0.564	0.949	0.99474
263	ANKRD26_KAN624-13_2.tif:0010-0735	0.67	1398.08	261	3711	14.028	83.409	0.974	936.54	72700	1.231	0.812	0.972	0.958128
264	ANKRD26_KAN624-13_2.tif:0011-0928	0.67	1427.96	41	4258	2.327	105.328	0.932	956.559	74254	1.25	0.8	0.963	0.978608
265	ANKRD26_KAN624-13_2.tif:0012-0959	0.451	1076.49	432	1857	61.525	108.838	0.991	485.365	37677	1.065	0.939	0.986	0.496553
266	ANKRD26_KAN624-13_2.tif:0013-0980	0.773	1543.58	169	5480	39.038	111.213	0.914	1193.09	92615	1.074	0.931	0.909	1.22059
267	ANKRD26_KAN624-13_2.tif:0014-0989	0.786	1368.74	0	4293	138.397	112.212	0.929	1075.58	83493	1.222	0.818	0.931	1.10037
268	ANKRD26_KAN624-13_2.tif:0015-1024	0.747	1658.95	65	4837	88.53	116.224	0.977	1239.52	96219	1.241	0.805	0.967	1.26809
269	ANKRD26_KAN624-13_2.tif:0016-1164	0.747	1545.72	145	5080	114.293	132.11	0.936	1154.92	89652	1.226	0.816	0.959	1.18154
270	ANKRD26_KAN624-13_3.tif:0001-0175	1.082	1354.88	0	5207	18.519	19.876	0.808	1466.13	113810	1.755	0.57	0.903	1.49992
271	ANKRD26_KAN624-13_3.tif:0002-0364	1.147	1218.65	2	4927	45.99	41.279	0.686	1397.21	108460	2.042	0.49	0.824	1.42942
272	ANKRD26_KAN624-13_3.tif:0003-0367	0.915	1240.06	9	3995	93.072	41.69	0.93	1134.2	88044	1.475	0.678	0.934	1.16035
273	ANKRD26_KAN624-13_3.tif:0004-0378	0.438	1000.38	336	1916	24.743	42.903	1	438.164	34013	1.141	0.876	0.971	0.448264
274	ANKRD26_KAN624-13_3.tif:0005-0410	0.644	1562.56	125	5025	134.616	46.594	0.981	1006.47	78128	1.324	0.755	0.952	1.02966
275	ANKRD26_KAN624-13_3.tif:0006-0550	0.464	1275.67	347	2822	6.129	62.425	0.965	591.605	45924	1	1	1	0.605242
276	ANKRD26_KAN624-13_3.tif:0007-0626	0.58	1063.53	199	2488	39.782	71.108	1	616.532	47859	1	1	0.957	0.630743
277	ANKRD26_KAN624-13_3.tif:0008-0670	1.121	1211.48	0	4520	66.234	76.052	0.8	1357.78	105399	1.897	0.527	0.906	1.38907
278	ANKRD26_KAN624-13_3.tif:0009-0837	0.67	1750.06	206	5181	86.247	95.067	0.974	1172.32	91003	1.231	0.812	0.972	1.19935
279	ANKRD26_KAN624-13_3.tif:0010-0878	0.657	1272.57	134	3450	26.226	99.716	1	836.071	64901	1.215	0.823	0.953	0.855343
280	ANKRD26_KAN624-13_3.tif:0011-0914	0.67	1884.65	245	5374	41.382	103.726	0.974	1262.49	98002	1.231	0.812	0.972	1.29159
281	ANKRD26_KAN624-13_3.tif:0012-1024	0.657	1563.53	122	4710	105.516	116.218	1	1027.23	79740	1.194	0.837	0.962	1.05091
282	ANKRD26_KAN624-13_3.tif:0013-1109	0.67	1335.37	167	3558	83.252	125.872	1	894.531	69439	1.139	0.878	0.963	0.915151
283	ANKRD26_KAN624-13_3.tif:0014-1132	0.58	1269.4	156	2933	19.516	128.476	0.943	735.873	57123	1.388	0.72	0.968	0.752836
284	ANKRD26_KAN624-13_3.tif:0015-1140	0.67	1271	90	3841	125.431	129.383	0.956	851.414	66092	1.485	0.673	0.929	0.87104
285	ANKRD26_KAN624-13_3.tif:0016-1194	0.812	1275.94	0	4079	93.876	135.534	0.739	1035.53	80384	1.857	0.539	0.857	1.0594
286	ANKRD26_KAN624-13_3.tif:0017-1206	0.554	1084.84	459	2217	42.052	136.938	0.994	600.931	46648	1.319	0.758	0.956	0.614783
287	ANKRD26_KAN624-13_3.tif:0018-1236	0.502	1451.95	150	3974	52.444	140.337	0.969	729.47	56626	1.261	0.793	0.963	0.746285
288	ANKRD26_KAN624-13_4.tif:0001-0167	0.824	1432.75	0	5149	69.522	18.955	0.79	1181.25	91696	1.334	0.75	0.883	1.20848
289	ANKRD26_KAN624-13_4.tif:0002-0214	0.76	1443.58	0	4796	108.091	24.33	0.914	1097.19	85171	1.25	0.8	0.967	1.12249
290	ANKRD26_KAN624-13_4.tif:0003-0342	0.747	1167.05	201	3015	134.57	38.817	0.92	871.987	67689	1.485	0.673	0.935	0.892087
291	ANKRD26_KAN624-13_4.tif:0004-0541	0.966	1400.45	57	6359	74.87	61.463	0.781	1353.07	105034	1.446	0.692	0.882	1.38426
292	ANKRD26_KAN624-13_4.tif:0005-0548	0.979	1753.64	0	7120	94.411	62.231	0.792	1716.91	133277	1.639	0.61	0.899	1.75648
293	ANKRD26_KAN624-13_4.tif:0006-0561	1.327	859.417	0	4619	116.881	63.693	0.803	1140.34	88520	1.993	0.502	0.932	1.16662
294	ANKRD26_KAN624-13_4.tif:0007-0575	0.451	1020.94	460	1643	45.619	65.271	0.991	460.322	35733	1.065	0.939	0.986	0.470932
295	ANKRD26_KAN624-13_4.tif:0008-0648	1.185	1154.02	24	4889	12.464	73.607	0.748	1367.71	106170	1.96	0.51	0.925	1.39924
296	ANKRD26_KAN624-13_4.tif:0009-0657	0.915	841.239	0	2026	142.483	74.577	0.792	769.431	59728	1.466	0.682	0.861	0.787167
297	ANKRD26_KAN624-13_4.tif:0010-0747	0.593	1358.48	376	3258	54.707	84.785	0.964	805.012	62490	1.351	0.74	0.979	0.823568
298	ANKRD26_KAN624-13_4.tif:0011-0893	0.515	1400.3	176	3331	11.407	101.356	0.994	721.561	56012	1.209	0.827	0.976	0.738193
299	ANKRD26_KAN624-13_4.tif:0012-0940	0.747	1610.79	84	4976	42.975	106.741	0.977	1203.54	93426	1.306	0.765	0.967	1.23128
300	ANKRD26_KAN624-13_4.tif:0013-0972	0.451	1076	507	1727	102.272	110.314	0.991	485.146	37660	1.065	0.939	0.986	0.496329
301	ANKRD26_KAN624-13_4.tif:0014-0992	0.76	1773.17	56	6046	79.67	112.653	0.936	1347.7	104617	1.21	0.826	0.915	1.37877
302	ANKRD26_KAN624-13_4.tif:0015-1036	0.747	1492.81	82	4250	129.165	117.6	0.977	1115.38	86583	1.151	0.869	0.959	1.14109
303	ANKRD26_KAN624-13_4.tif:0016-1267	0.683	1397.11	163	3366	20.844	143.784	0.949	953.892	74047	1.188	0.841	0.981	0.97588
304	ANKRD26_KAN624-13_5.tif:0001-0058	0.657	1379.53	196	3614	105.561	6.658	1	906.344	70356	1.194	0.837	0.962	0.927236
305	ANKRD26_KAN624-13_5.tif:0002-0107	0.889	1399.22	8	5020	17.926	12.162	0.918	1243.73	96546	1.435	0.697	0.939	1.2724
306	ANKRD26_KAN624-13_5.tif:0003-0131	0.67	1106.48	202	2336	139.278	14.914	0.974	741.206	57537	1.231	0.812	0.972	0.758292
307	ANKRD26_KAN624-13_5.tif:0004-0276	0.786	907.508	15	2385	41.425	31.36	0.716	713.136	55358	1.808	0.553	0.841	0.729574
308	ANKRD26_KAN624-13_5.tif:0005-0285	0.322	990.92	415	1522	2.554	32.404	1	319.132	24773	1	1	1	0.326488
309	ANKRD26_KAN624-13_5.tif:0006-0302	0.773	1360.47	93	2919	68.881	34.266	0.969	1051.55	81628	1.014	0.986	0.968	1.07579
310	ANKRD26_KAN624-13_5.tif:0007-0353	0.747	1696.62	18	4502	25.496	40.116	0.977	1267.66	98404	1.306	0.765	0.967	1.29689
311	ANKRD26_KAN624-13_5.tif:0008-0361	0.618	1040.9	244	2082	128.144	41.016	0.883	643.636	49963	1.53	0.653	0.889	0.658472
312	ANKRD26_KAN624-13_5.tif:0009-0369	0.683	1223.89	248	2631	111.45	41.932	0.993	835.62	64866	1.148	0.871	0.972	0.854882
313	ANKRD26_KAN624-13_5.tif:0010-0472	1.082	1077.79	65	3706	76.053	53.637	0.726	1166.28	90534	1.909	0.524	0.87	1.19317
314	ANKRD26_KAN624-13_5.tif:0011-0647	0.747	1693.12	116	4396	5.321	73.433	0.977	1265.05	98201	1.151	0.869	0.959	1.29421
315	ANKRD26_KAN624-13_5.tif:0012-0710	0.67	1757.69	174	5448	119.291	80.629	0.974	1177.44	91400	1.179	0.848	0.963	1.20458
316	ANKRD26_KAN624-13_5.tif:0013-0797	0.541	2058.38	150	5122	106.463	90.516	0.943	1113.7	86452	1.167	0.857	1	1.13937
317	ANKRD26_KAN624-13_5.tif:0014-0813	0.837	1776.65	135	5947	72.421	92.337	0.951	1487.67	115482	1.459	0.685	0.963	1.52196
318	ANKRD26_KAN624-13_5.tif:0015-0895	0.734	1886.61	77	5787	122.627	101.661	1	1385.32	107537	1.344	0.744	0.958	1.41725
319	ANKRD26_KAN624-13_5.tif:0016-1111	0.631	1316.73	344	3342	79.046	126.102	0.961	831.163	64520	1.368	0.731	0.951	0.850322
320	ANKRD26_KAN624-13_5.tif:0017-1135	0.605	1339.51	173	3862	94.781	128.816	0.94	811.028	62957	1.336	0.748	0.989	0.829723
321	ANKRD26_KAN624-13_5.tif:0018-1166	0.618	1324.65	100	2969	4.767	132.341	0.916	819.092	63583	1.333	0.75	1	0.837973
322	ANKRD26_KAN624-13_5.tif:0019-1212	0.58	1254.22	162	3109	35.292	137.568	0.99	727.074	56440	1.388	0.72	0.968	0.743834
323	ANKRD26_KAN624-13_5.tif:0020-1223	0.67	1231.1	186	2662	1.192	138.797	0.974	824.683	64017	1.176	0.85	0.963	0.843693
324	ANKRD26_KAN624-13_5.tif:0021-1236	0.631	1383.37	233	4011	4.657	140.336	0.961	873.223	67785	1.368	0.731	0.951	0.893352
325	ANKRD26_KAN624-13_5.tif:0022-1260	0.67	1199.1	161	2641	107.428	143.01	1	803.247	62353	1.139	0.878	0.963	0.821763
326	ANKRD26_KAN624-13_5.tif:0023-1273	0.58	1352.22	257	2963	119.925	144.555	0.99	783.885	60850	1.202	0.832	0.968	0.801954
										75877.1				1

## Sheet: IF condition
Exp. number	Cell line	Gene induced	Culture condition, fixation condition	rabbit-Alexa488	mouse IgG1-Alexa568	mouse IgG2b-Alexa647	Nuclear stain	Date	Replicate
KAN624-1	RPE-BFP-Cas9 pMCB306 (pool)		Serum starved for 24 hours. Fixed in 100% methanol at -20C for 5 minutes.	ANKRD26, in house, M8, 1:1000	CEP170, Invitrogen, 41-3200, 1:1000	Ac-Tub, 6B-11, Santa Cruz, 1:1000	DAPI	No.6	2021-03-09
KAN624-2	RPE-BFP-Cas9 CEP164KO (pool)		Serum starved for 24 hours. Fixed in 100% methanol at -20C for 5 minutes.	ANKRD26, in house, M8, 1:1000	CEP170, Invitrogen, 41-3200, 1:1000	Ac-Tub, 6B-11, Santa Cruz, 1:1000	DAPI	No.6	2021-03-09
KAN624-3	RPE-BFP-Cas9 CEP83 KO (pool)		Serum starved for 24 hours. Fixed in 100% methanol at -20C for 5 minutes.	ANKRD26, in house, M8, 1:1000	CEP170, Invitrogen, 41-3200, 1:1000	Ac-Tub, 6B-11, Santa Cruz, 1:1000	DAPI	No.6	2021-03-09
KAN624-4	RPE-BFP-Cas9 SCLT1 KO (pool)		Serum starved for 24 hours. Fixed in 100% methanol at -20C for 5 minutes.	ANKRD26, in house, M8, 1:1000	CEP170, Invitrogen, 41-3200, 1:1000	Ac-Tub, 6B-11, Santa Cruz, 1:1000	DAPI	No.6	2021-03-09
KAN624-5	RPE-BFP-Cas9 FBF1 KO (pool)		Serum starved for 24 hours. Fixed in 100% methanol at -20C for 5 minutes.	ANKRD26, in house, M8, 1:1000	CEP170, Invitrogen, 41-3200, 1:1000	Ac-Tub, 6B-11, Santa Cruz, 1:1000	DAPI	No.6	2021-03-09
KAN624-6	RPE-BFP-Cas9 CEP89KO (pool)		Serum starved for 24 hours. Fixed in 100% methanol at -20C for 5 minutes.	ANKRD26, in house, M8, 1:1000	CEP170, Invitrogen, 41-3200, 1:1000	Ac-Tub, 6B-11, Santa Cruz, 1:1000	DAPI	No.6	2021-03-09
KAN624-7	RPE-BFP-Cas9 CCDC92 KO (pool)		Serum starved for 24 hours. Fixed in 100% methanol at -20C for 5 minutes.	ANKRD26, in house, M8, 1:1000	CEP170, Invitrogen, 41-3200, 1:1000	Ac-Tub, 6B-11, Santa Cruz, 1:1000	DAPI	No.6	2021-03-09
KAN624-8	RPE-BFP-Cas9 ANKRD26 KO (pool)		Serum starved for 24 hours. Fixed in 100% methanol at -20C for 5 minutes.	ANKRD26, in house, M8, 1:1000	CEP170, Invitrogen, 41-3200, 1:1000	Ac-Tub, 6B-11, Santa Cruz, 1:1000	DAPI	No.6	2021-03-09
KAN624-9	RPE-BFP-Cas9 TTBK2 KO (pool)		Serum starved for 24 hours. Fixed in 100% methanol at -20C for 5 minutes.	ANKRD26, in house, M8, 1:1000	CEP170, Invitrogen, 41-3200, 1:1000	Ac-Tub, 6B-11, Santa Cruz, 1:1000	DAPI	No.6	2021-03-09
KAN624-10	RPE-BFP-Cas9 INPP5E KO (pool)		Serum starved for 24 hours. Fixed in 100% methanol at -20C for 5 minutes.	ANKRD26, in house, M8, 1:1000	CEP170, Invitrogen, 41-3200, 1:1000	Ac-Tub, 6B-11, Santa Cruz, 1:1000	DAPI	No.6	2021-03-09
KAN624-11	RPE-BFP-Cas9 Kiz KO (pool)		Serum starved for 24 hours. Fixed in 100% methanol at -20C for 5 minutes.	ANKRD26, in house, M8, 1:1000	CEP170, Invitrogen, 41-3200, 1:1000	Ac-Tub, 6B-11, Santa Cruz, 1:1000	DAPI	No.6	2021-03-09
KAN624-12	RPE-BFP-Cas9 LRRC45 KO (pool)		Serum starved for 24 hours. Fixed in 100% methanol at -20C for 5 minutes.	ANKRD26, in house, M8, 1:1000	CEP170, Invitrogen, 41-3200, 1:1000	Ac-Tub, 6B-11, Santa Cruz, 1:1000	DAPI	No.6	2021-03-09
KAN624-13	RPE-BFP-Cas9 sgSafe (pool)		Serum starved for 24 hours. Fixed in 100% methanol at -20C for 5 minutes.	ANKRD26, in house, M8, 1:1000	CEP170, Invitrogen, 41-3200, 1:1000	Ac-Tub, 6B-11, Santa Cruz, 1:1000	DAPI	No.6	2021-03-09
