# Supplementary material for: A hierarchical pathway for assembly of the distal appendages that organize primary cilia
Source: eLife. 2025 Jan 30;14:e85999. doi: 10.7554/eLife.85999 (PMC11984956; doi:10.7554/eLife.85999)
Supplement: Figure 2—source data 8. [file elife-85999-fig2-data8.xlsx]

## Sheet: Raw data
	Label	Area	Mean	Min	Max	X	Y	Circ	IntDen	RawIntDen	AR	Round	Solidity
325	TTBK2_KAN550-1_1.tif:0001-0036	1.268	55.264	0	320	9.699	3.767	0.846	70.092	6687	1.671	0.598	0.917	0.464457
326	TTBK2_KAN550-1_1.tif:0002-0057	1.719	121.085	0	805	118.3	5.912	0.925	208.149	19858	1.22	0.82	0.94	1.37927
327	TTBK2_KAN550-1_1.tif:0003-0291	1.897	96.453	0	910	43.458	29.778	0.786	182.992	17458	1.505	0.665	0.883	1.21258
328	TTBK2_KAN550-1_1.tif:0004-0322	2.128	81.399	0	786	73.612	33.015	0.862	173.202	16524	1.479	0.676	0.942	1.1477
329	TTBK2_KAN550-1_1.tif:0005-0395	2.002	113.822	0	1196	127.228	40.426	0.867	227.876	21740	1.556	0.643	0.946	1.50999
330	TTBK2_KAN550-1_1.tif:0006-0473	1.855	101.514	0	849	88.425	48.392	0.829	188.338	17968	1.515	0.66	0.915	1.248
331	TTBK2_KAN550-1_1.tif:0007-0513	2.233	82.343	0	760	135.953	52.517	0.845	183.841	17539	1.395	0.717	0.92	1.2182
332	TTBK2_KAN550-1_1.tif:0008-0553	2.002	85.052	0	492	25.476	56.705	0.812	170.278	16245	1.497	0.668	0.912	1.12832
333	TTBK2_KAN550-1_1.tif:0009-0716	1.373	92.076	0	684	44.454	73.29	0.902	126.432	12062	1.381	0.724	0.974	0.837787
334	TTBK2_KAN550-1_1.tif:0010-0742	2.243	81.827	0	786	131.927	75.954	0.819	183.548	17511	1.608	0.622	0.971	1.21626
335	TTBK2_KAN550-1_1.tif:0011-0755	1.667	120.252	0	919	83.217	77.317	0.862	200.413	19120	1.354	0.738	0.958	1.32801
336	TTBK2_KAN550-1_1.tif:0012-0874	1.971	66.867	0	581	84.437	89.549	0.816	131.767	12571	1.494	0.669	0.917	0.873141
337	TTBK2_KAN550-1_2.tif:0001-0028	1.321	66.365	0	353	13.652	2.915	0.881	87.649	8362	1.416	0.706	0.93	0.580797
338	TTBK2_KAN550-1_2.tif:0002-0059	2.463	55.026	0	558	131.558	6.065	0.829	135.541	12931	1.524	0.656	0.914	0.898145
339	TTBK2_KAN550-1_2.tif:0003-0086	1.939	133.205	0	1153	92.895	8.811	0.847	258.304	24643	1.385	0.722	0.927	1.71162
340	TTBK2_KAN550-1_2.tif:0004-0175	1.719	76.884	0	576	93.244	17.934	0.828	132.166	12609	1.495	0.669	0.965	0.87578
341	TTBK2_KAN550-1_2.tif:0005-0265	1.866	73.298	0	637	41.111	27.207	0.893	136.757	13047	1.152	0.868	0.92	0.906202
342	TTBK2_KAN550-1_2.tif:0006-0473	1.604	154.745	0	1180	83.158	48.432	0.926	248.168	23676	1.178	0.849	0.962	1.64446
343	TTBK2_KAN550-1_2.tif:0007-0560	1.342	65.703	0	376	31.349	57.341	0.881	88.152	8410	1.423	0.703	0.962	0.584131
344	TTBK2_KAN550-1_2.tif:0008-0766	1.667	47.145	0	272	75.847	78.507	0.929	78.572	7496	1.063	0.941	0.958	0.520648
345	TTBK2_KAN550-1_2.tif:0009-0860	2.044	76.256	0	701	90.536	88.067	0.811	155.865	14870	1.443	0.693	0.933	1.03282
346	TTBK2_KAN550-1_2.tif:0010-1012	1.688	48.59	0	363	89.875	103.564	0.931	82	7823	1.218	0.821	0.939	0.54336
347	TTBK2_KAN550-1_3.tif:0001-0161	1.824	110.891	0	860	137.007	16.557	0.861	202.247	19295	1.423	0.703	0.938	1.34017
348	TTBK2_KAN550-1_3.tif:0002-0201	2.537	80.595	0	710	119.575	20.577	0.805	204.438	19504	1.627	0.615	0.911	1.35468
349	TTBK2_KAN550-1_3.tif:0003-0414	1.352	80.729	0	515	34.687	42.386	0.878	109.158	10414	1.406	0.711	0.942	0.723323
350	TTBK2_KAN550-1_3.tif:0004-0476	1.583	45.219	0	244	124.113	48.77	0.851	71.57	6828	1.424	0.702	0.907	0.474251
351	TTBK2_KAN550-1_3.tif:0005-0498	2.075	91.136	0	782	92.277	50.999	0.86	189.145	18045	1.316	0.76	0.921	1.25335
352	TTBK2_KAN550-1_3.tif:0006-0501	1.646	91.191	0	652	71.705	51.289	0.894	150.069	14317	1.212	0.825	0.94	0.994412
353	TTBK2_KAN550-1_3.tif:0007-0584	1.75	93	0	723	57.67	59.878	0.875	162.794	15531	1.228	0.814	0.949	1.07873
354	TTBK2_KAN550-1_3.tif:0008-0633	1.593	76.684	0	551	108.667	64.819	0.888	122.177	11656	1.127	0.887	0.933	0.809588
355	TTBK2_KAN550-1_3.tif:0009-0708	1.73	75.776	0	662	23.788	72.502	0.844	131.055	12503	1.379	0.725	0.93	0.868418
356	TTBK2_KAN550-1_3.tif:0010-0799	1.709	103.528	0	788	80.744	81.805	0.887	176.881	16875	1.534	0.652	0.934	1.17208
357	TTBK2_KAN550-1_3.tif:0011-0798	1.3	79.782	0	488	14.972	81.698	0.902	103.697	9893	1.45	0.69	0.943	0.687136
358	TTBK2_KAN550-1_3.tif:0012-0996	2.075	88.924	0	941	114.829	101.998	0.751	184.554	17607	1.928	0.519	0.919	1.22293
359	TTBK2_KAN550-1_4.tif:0001-0014	1.3	59.435	0	336	1.04	1.391	0.854	77.251	7370	1.425	0.702	0.95	0.511896
360	TTBK2_KAN550-1_4.tif:0002-0228	1.478	71.567	0	556	16.43	23.358	0.96	105.772	10091	1.091	0.916	0.966	0.700888
361	TTBK2_KAN550-1_4.tif:0003-0322	2.002	69.298	0	611	31.053	32.998	0.895	138.738	13236	1.392	0.718	0.946	0.91933
362	TTBK2_KAN550-1_4.tif:0004-0395	1.646	122.892	0	962	85.958	40.432	0.917	202.237	19294	1.087	0.92	0.946	1.3401
363	TTBK2_KAN550-1_4.tif:0005-0438	1.834	91.886	0	633	128.743	44.89	0.887	168.548	16080	1.224	0.817	0.943	1.11686
364	TTBK2_KAN550-1_4.tif:0006-0473	1.52	60.269	0	563	30.452	48.455	0.925	91.601	8739	1.256	0.796	0.957	0.606983
365	TTBK2_KAN550-1_4.tif:0007-0612	1.771	61.325	0	445	49.257	62.652	0.953	108.634	10364	1.037	0.965	0.952	0.71985
366	TTBK2_KAN550-1_4.tif:0008-0617	1.593	124.184	0	898	81.572	63.163	0.888	197.856	18876	1.112	0.899	0.93	1.31107
367	TTBK2_KAN550-1_4.tif:0009-0662	1.667	77.686	0	500	134.083	67.8	0.875	129.472	12352	1.388	0.72	0.93	0.85793
368	TTBK2_KAN550-1_4.tif:0010-0665	1.048	128.67	0	603	57.975	68.06	0.962	134.87	12867	1.163	0.86	0.966	0.8937
369	TTBK2_KAN550-1_4.tif:0011-0816	1.426	57.14	0	352	140.462	83.505	0.891	81.455	7771	1.183	0.845	0.916	0.539748
370	TTBK2_KAN550-1_4.tif:0012-0899	1.509	90.167	0	655	18.574	92.077	0.895	136.096	12984	1.179	0.848	0.932	0.901827
371	TTBK2_KAN550-1_5.tif:0001-0029	1.405	50.493	0	299	27.848	2.961	0.912	70.92	6766	1.148	0.871	0.95	0.469944
372	TTBK2_KAN550-1_5.tif:0002-0097	2.075	88.318	0	647	114.873	10.005	0.852	183.296	17487	1.574	0.635	0.921	1.21459
373	TTBK2_KAN550-1_5.tif:0003-0113	2.285	124.803	0	1261	56.038	11.462	0.797	285.18	27207	1.37	0.73	0.906	1.88971
374	TTBK2_KAN550-1_5.tif:0004-0433	1.426	61.478	0	456	58.23	44.367	0.845	87.639	8361	1.433	0.698	0.928	0.580728
375	TTBK2_KAN550-1_5.tif:0005-0470	1.143	55.413	0	334	17.144	48.167	0.913	63.31	6040	1.097	0.911	0.952	0.419519
376	TTBK2_KAN550-1_5.tif:0006-0669	1.09	81.923	0	283	126.937	68.536	0.939	89.305	8520	1.134	0.882	0.972	0.591772
377	TTBK2_KAN550-1_5.tif:0007-0693	1.709	67.491	0	558	93.59	70.954	0.919	115.311	11001	1.266	0.79	0.945	0.764094
378	TTBK2_KAN550-1_5.tif:0008-0717	1.677	99.369	0	734	39.878	73.386	0.911	166.651	15899	1.117	0.895	0.947	1.10429
379	TTBK2_KAN550-1_5.tif:0009-0915	1.635	120.333	0	974	126.312	93.675	0.867	196.765	18772	1.408	0.71	0.937	1.30384
380	TTBK2_KAN550-1_5.tif:0010-0919	1.289	84.537	0	465	67.067	94.064	0.921	108.99	10398	1.089	0.918	0.935	0.722211
381	TTBK2_KAN550-1_6.tif:0001-0104	1.75	140.527	0	1115	78.587	10.63	0.965	245.988	23468	1.072	0.932	0.952	1.63001
382	TTBK2_KAN550-1_6.tif:0002-0153	2.285	114.023	0	879	96.922	15.732	0.83	260.548	24857	1.286	0.778	0.895	1.72649
383	TTBK2_KAN550-1_6.tif:0003-0265	1.918	71.809	0	460	30.429	27.205	0.83	137.742	13141	1.705	0.587	0.91	0.912731
384	TTBK2_KAN550-1_6.tif:0004-0303	2.054	112.556	0	1457	136.763	31.082	0.889	231.24	22061	1.125	0.889	0.931	1.53229
385	TTBK2_KAN550-1_6.tif:0005-0404	1.939	85.643	0	855	46.798	41.327	0.847	166.075	15844	1.331	0.752	0.92	1.10047
386	TTBK2_KAN550-1_6.tif:0006-0505	1.75	167.814	0	1412	69.405	51.681	0.919	293.754	28025	1.359	0.736	0.952	1.94653
387	TTBK2_KAN550-1_6.tif:0007-0534	2.075	57.591	0	345	131.704	54.603	0.871	119.525	11403	1.266	0.79	0.921	0.792015
388	TTBK2_KAN550-1_6.tif:0008-0547	1.625	103.303	0	733	106.71	55.989	0.874	167.836	16012	1.415	0.706	0.914	1.11214
389	TTBK2_KAN550-1_6.tif:0009-0708	1.635	74.821	0	579	69.233	72.538	0.858	122.344	11672	1.353	0.739	0.918	0.810699
390	TTBK2_KAN550-1_6.tif:0010-0820	1.059	56.149	0	247	118.261	83.981	0.929	59.443	5671	1.263	0.792	0.935	0.393889
391	TTBK2_KAN550-1_6.tif:0011-0834	1.667	65.296	0	308	68.524	85.38	0.883	108.823	10382	1.264	0.791	0.952	0.7211
										14397.4				1
392	TTBK2_KAN550-2_1.tif:0001-0021	1.929	11.022	0	70	110.243	2.119	0.945	21.257	2028	1.103	0.906	0.939	0.140858
393	TTBK2_KAN550-2_1.tif:0002-0220	1.761	35.452	0	177	33.599	22.482	0.924	62.43	5956	1.104	0.906	0.957	0.413684
394	TTBK2_KAN550-2_1.tif:0003-0237	2.222	21.915	0	165	62.2	24.372	0.7	48.699	4646	1.557	0.642	0.864	0.322696
395	TTBK2_KAN550-2_1.tif:0004-0249	1.677	21.131	0	71	86.937	25.516	0.934	35.439	3381	1.201	0.832	0.958	0.234833
396	TTBK2_KAN550-2_1.tif:0005-0378	1.478	9	0	53	37.96	38.662	0.949	13.301	1269	1.187	0.843	0.946	0.0881406
397	TTBK2_KAN550-2_1.tif:0006-0387	1.132	8.843	0	45	107.393	39.571	0.878	10.01	955	1.198	0.834	0.952	0.0663312
398	TTBK2_KAN550-2_1.tif:0007-0494	1.488	13.007	0	110	77.491	50.63	0.93	19.36	1847	1.015	0.985	0.937	0.128287
399	TTBK2_KAN550-2_1.tif:0008-0585	1.551	11.811	0	100	92.688	59.846	0.934	18.322	1748	1.306	0.765	0.934	0.12141
400	TTBK2_KAN550-2_1.tif:0009-0668	1.604	14.549	0	139	106.341	68.374	0.926	23.333	2226	1.213	0.824	0.975	0.154611
401	TTBK2_KAN550-2_1.tif:0010-0682	1.069	9.431	0	46	56.833	69.856	0.95	10.084	962	1.103	0.906	0.967	0.0668174
402	TTBK2_KAN550-2_1.tif:0011-0929	1.101	6.181	0	35	10.792	95.152	0.935	6.803	649	1.072	0.933	0.942	0.0450774
403	TTBK2_KAN550-2_1.tif:0012-0955	1.048	7.72	0	28	22.114	97.874	0.813	8.092	772	1.644	0.608	0.939	0.0536206
404	TTBK2_KAN550-2_1.tif:0013-0963	1.646	8.255	0	77	135.598	98.653	0.931	13.584	1296	1.148	0.871	0.937	0.090016
405	TTBK2_KAN550-2_1.tif:0014-0988	1.509	15.875	0	116	94.386	101.216	0.885	23.962	2286	1.554	0.644	0.926	0.158778
406	TTBK2_KAN550-2_2.tif:0001-0079	1.237	67.246	0	253	61.96	8.11	0.696	83.174	7935	2.321	0.431	0.891	0.551139
407	TTBK2_KAN550-2_2.tif:0002-0122	1.866	20.264	0	134	80.635	12.495	0.924	37.808	3607	1.245	0.803	0.947	0.250531
408	TTBK2_KAN550-2_2.tif:0003-0197	1.866	12.09	0	128	54.465	20.144	0.969	22.557	2152	1.114	0.898	0.947	0.149471
409	TTBK2_KAN550-2_2.tif:0004-0237	1.625	18.239	0	202	134.55	24.294	0.905	29.632	2827	1.191	0.84	0.945	0.196354
410	TTBK2_KAN550-2_2.tif:0005-0254	1.069	17.971	0	119	18.228	26.055	0.921	19.213	1833	1.14	0.878	0.967	0.127314
411	TTBK2_KAN550-2_2.tif:0006-0371	1.405	20.03	0	151	123.091	37.961	0.964	28.133	2684	1.116	0.896	0.954	0.186422
412	TTBK2_KAN550-2_2.tif:0007-0442	1.824	22.626	0	166	108.118	45.228	0.894	41.267	3937	1.416	0.706	0.93	0.273451
413	TTBK2_KAN550-2_2.tif:0008-0486	1.572	8.013	0	50	43.698	49.749	0.932	12.599	1202	1.22	0.82	0.955	0.083487
414	TTBK2_KAN550-2_2.tif:0009-0544	1.467	10.671	0	68	87.319	55.71	0.927	15.66	1494	1.091	0.917	0.966	0.103768
415	TTBK2_KAN550-2_2.tif:0010-0611	1.237	8.11	0	47	27.099	62.523	0.948	10.031	957	1.149	0.87	0.955	0.0664701
416	TTBK2_KAN550-2_2.tif:0011-0646	1.331	10.913	0	110	54.167	66.213	0.967	14.528	1386	1.303	0.767	0.941	0.0962671
417	TTBK2_KAN550-2_2.tif:0012-0700	1.373	18.244	0	142	129.845	71.655	0.953	25.052	2390	1.018	0.982	0.967	0.166002
418	TTBK2_KAN550-2_2.tif:0013-0713	1.667	13.22	0	88	26.69	73.044	0.943	22.033	2102	1.169	0.855	0.938	0.145998
419	TTBK2_KAN550-2_2.tif:0014-0755	1.688	9.503	0	53	105.058	77.363	0.94	16.037	1530	1.24	0.806	0.961	0.106269
420	TTBK2_KAN550-2_2.tif:0015-0908	1.384	20.621	0	135	124.947	93.011	0.949	28.532	2722	1.058	0.945	0.943	0.189061
421	TTBK2_KAN550-2_3.tif:0001-0014	1.625	21.877	0	141	97.466	1.513	0.953	35.544	3391	1.174	0.852	0.954	0.235528
422	TTBK2_KAN550-2_3.tif:0002-0179	1.405	18.866	0	99	55.454	18.338	0.878	26.498	2528	1.44	0.694	0.921	0.175587
423	TTBK2_KAN550-2_3.tif:0003-0190	1.593	13.776	0	84	135.225	19.533	0.934	21.949	2094	1.236	0.809	0.95	0.145442
424	TTBK2_KAN550-2_3.tif:0004-0283	1.604	19.248	0	134	74.856	29.047	0.941	30.869	2945	1.248	0.801	0.95	0.20455
425	TTBK2_KAN550-2_3.tif:0005-0318	1.226	10.308	0	86	20.03	32.586	0.912	12.641	1206	1.175	0.851	0.951	0.0837648
426	TTBK2_KAN550-2_3.tif:0006-0375	1.143	7.844	0	58	7.486	38.416	0.942	8.962	855	1.19	0.841	0.965	0.0593855
427	TTBK2_KAN550-2_3.tif:0007-0455	1.562	14.517	0	147	67.996	46.579	0.976	22.672	2163	1.154	0.866	0.958	0.150235
428	TTBK2_KAN550-2_3.tif:0008-0497	1.08	7.369	0	51	25.232	50.887	0.96	7.956	759	1.123	0.89	0.972	0.0527177
429	TTBK2_KAN550-2_3.tif:0009-0503	1.258	9.433	0	41	84.798	51.564	0.936	11.865	1132	1.082	0.924	0.964	0.078625
430	TTBK2_KAN550-2_3.tif:0010-0670	1.331	10.929	0	75	39.728	68.609	0.979	14.549	1388	1.155	0.866	0.958	0.096406
431	TTBK2_KAN550-2_3.tif:0011-0675	1.405	8.022	0	47	8.428	69.106	0.964	11.268	1075	1.262	0.792	0.954	0.074666
432	TTBK2_KAN550-2_3.tif:0012-0682	1.342	16	0	134	125.892	69.844	0.921	21.467	2048	1.091	0.917	0.924	0.142247
433	TTBK2_KAN550-2_3.tif:0013-0696	1.289	7.203	0	83	72.148	71.317	0.921	9.287	886	1.204	0.83	0.939	0.0615387
434	TTBK2_KAN550-2_3.tif:0014-0717	1.415	10.178	0	61	86.244	73.409	0.884	14.402	1374	1.486	0.673	0.925	0.0954336
435	TTBK2_KAN550-2_3.tif:0015-0938	1.132	9.343	0	52	80.233	96.003	0.894	10.576	1009	1.309	0.764	0.923	0.0700819
436	TTBK2_KAN550-2_3.tif:0016-0954	1.373	7.382	0	31	40.138	97.75	0.969	10.136	967	1.276	0.783	0.946	0.0671647
437	TTBK2_KAN550-2_3.tif:0017-0963	1.069	8.539	0	34	109.715	98.653	0.968	9.13	871	1.123	0.89	0.932	0.0604968
438	TTBK2_KAN550-2_3.tif:0018-1000	1.08	5.641	0	21	127.782	102.368	0.978	6.09	581	1.206	0.829	0.949	0.0403544
439	TTBK2_KAN550-2_4.tif:0001-0029	1.247	4.63	0	21	7.784	2.982	0.973	5.776	551	1.083	0.924	0.93	0.0382707
440	TTBK2_KAN550-2_4.tif:0002-0064	1.656	16.987	0	210	79.967	6.547	0.961	28.133	2684	1.06	0.943	0.929	0.186422
441	TTBK2_KAN550-2_4.tif:0003-0280	1.384	26.939	0	118	117.778	28.74	0.961	37.273	3556	1.17	0.855	0.971	0.246988
442	TTBK2_KAN550-2_4.tif:0004-0293	1.467	11.507	0	62	37.606	30.037	0.917	16.886	1611	1.187	0.843	0.927	0.111895
443	TTBK2_KAN550-2_4.tif:0005-0337	1.75	8.365	0	67	70.033	34.486	0.941	14.643	1397	1.236	0.809	0.954	0.0970311
444	TTBK2_KAN550-2_4.tif:0006-0342	1.289	16.317	0	100	93.071	35.022	0.948	21.037	2007	1.04	0.961	0.943	0.1394
445	TTBK2_KAN550-2_4.tif:0007-0346	1.562	8.671	0	81	39.302	35.445	0.893	13.543	1292	1.223	0.817	0.925	0.0897381
446	TTBK2_KAN550-2_4.tif:0008-0644	1.834	29.697	0	128	122.265	65.97	0.921	54.474	5197	1.128	0.886	0.916	0.360967
447	TTBK2_KAN550-2_4.tif:0009-0701	1.069	14.373	0	107	14.504	71.778	0.95	15.366	1466	1.108	0.902	0.967	0.101824
448	TTBK2_KAN550-2_4.tif:0010-0843	1.195	8.184	0	45	37.051	86.288	0.9	9.78	933	1.212	0.825	0.979	0.0648032
449	TTBK2_KAN550-2_4.tif:0011-0869	1.279	8.189	0	45	108.426	88.951	0.863	10.471	999	1.562	0.64	0.942	0.0693873
450	TTBK2_KAN550-2_4.tif:0012-0911	1.289	9.138	0	74	55.529	93.326	0.976	11.782	1124	1.169	0.856	0.95	0.0780694
451	TTBK2_KAN550-2_4.tif:0013-0965	1.457	9.115	0	83	125.406	98.785	0.873	13.281	1267	1.146	0.873	0.952	0.0880017
452	TTBK2_KAN550-2_4.tif:0014-0972	1.048	8.97	0	43	56.229	99.496	0.853	9.402	897	1.396	0.716	0.885	0.0623027
453	TTBK2_KAN550-2_5.tif:0001-0202	1.897	10.602	0	99	39.16	20.696	0.879	20.115	1919	1.164	0.859	0.896	0.133288
454	TTBK2_KAN550-2_5.tif:0002-0284	1.971	18.261	0	112	65.184	29.143	0.861	35.984	3433	1.366	0.732	0.935	0.238445
455	TTBK2_KAN550-2_5.tif:0003-0286	1.321	17.46	0	78	110.597	29.248	0.943	23.06	2200	1.02	0.981	0.955	0.152805
456	TTBK2_KAN550-2_5.tif:0004-0399	1.08	17.515	0	64	15.018	40.919	0.978	18.909	1804	1.143	0.875	0.936	0.1253
457	TTBK2_KAN550-2_5.tif:0005-0413	1.74	21.331	0	121	109.921	42.331	0.913	37.116	3541	1.54	0.65	0.957	0.245946
458	TTBK2_KAN550-2_5.tif:0006-0494	1.646	11.732	0	61	44.286	50.584	0.917	19.308	1842	1.157	0.864	0.954	0.127939
459	TTBK2_KAN550-2_5.tif:0007-0503	1.656	20.494	0	126	96.278	51.545	0.933	33.94	3238	1.102	0.907	0.969	0.224901
460	TTBK2_KAN550-2_5.tif:0008-0511	1.52	17.034	0	95	141.62	52.344	0.976	25.89	2470	1.162	0.86	0.951	0.171558
461	TTBK2_KAN550-2_5.tif:0009-0704	1.855	12.124	0	66	116.735	72.122	0.888	22.494	2146	1.297	0.771	0.927	0.149054
462	TTBK2_KAN550-2_5.tif:0010-0775	1.426	15.426	0	71	49.552	79.402	0.978	21.991	2098	1.131	0.884	0.958	0.14572
463	TTBK2_KAN550-2_5.tif:0011-0792	1.52	14.614	0	92	27.851	81.095	0.901	22.211	2119	1.294	0.773	0.951	0.147179
464	TTBK2_KAN550-2_5.tif:0012-0825	1.667	7.698	0	39	119.686	84.42	0.943	12.83	1224	1.057	0.946	0.935	0.0850151
465	TTBK2_KAN550-2_5.tif:0013-0913	1.426	9.963	0	74	63.593	93.457	0.951	14.203	1355	1.075	0.93	0.951	0.0941139
466	TTBK2_KAN550-2_5.tif:0014-0913	1.153	6.536	0	37	69.222	93.443	0.894	7.536	719	1.257	0.795	0.961	0.0499394
467	TTBK2_KAN550-2_5.tif:0015-0969	1.216	5.052	0	37	52.929	99.27	0.932	6.142	586	1.082	0.924	0.947	0.0407017
468	TTBK2_KAN550-2_6.tif:0001-0084	1.426	12.691	0	68	19.317	8.555	0.901	18.092	1726	1.279	0.782	0.954	0.119882
469	TTBK2_KAN550-2_6.tif:0002-0090	2.013	17.536	0	119	49.103	9.128	0.844	35.292	3367	1.288	0.777	0.904	0.233861
470	TTBK2_KAN550-2_6.tif:0003-0182	1.331	19.315	0	134	47.72	18.62	0.951	25.712	2453	1.013	0.988	0.951	0.170377
471	TTBK2_KAN550-2_6.tif:0004-0313	2.128	5.562	0	52	102.965	32.128	0.873	11.834	1129	1.295	0.772	0.921	0.0784167
472	TTBK2_KAN550-2_6.tif:0005-0332	1.467	24.643	0	120	132.802	34.073	0.953	36.162	3450	1.147	0.872	0.959	0.239626
473	TTBK2_KAN550-2_6.tif:0006-0339	1.73	8.848	0	50	46.427	34.742	0.93	15.304	1460	1.208	0.828	0.943	0.101407
474	TTBK2_KAN550-2_6.tif:0007-0377	1.593	13.592	0	81	54.19	38.646	0.97	21.656	2066	1.095	0.913	0.962	0.143498
475	TTBK2_KAN550-2_6.tif:0008-0404	1.908	29.571	0	112	78.616	41.391	0.892	56.413	5382	1.204	0.831	0.929	0.373816
476	TTBK2_KAN550-2_6.tif:0009-0445	1.216	9.198	0	51	15.33	45.605	0.92	11.184	1067	1.205	0.83	0.924	0.0741104
477	TTBK2_KAN550-2_6.tif:0010-0610	1.321	18.794	0	123	43.755	62.5	0.906	24.821	2368	1.315	0.76	0.923	0.164474
478	TTBK2_KAN550-2_6.tif:0011-0651	1.792	15.854	0	114	31.471	66.676	0.9	28.416	2711	1.314	0.761	0.919	0.188297
479	TTBK2_KAN550-2_6.tif:0012-0740	1.75	14.042	0	109	90.007	75.805	0.919	24.58	2345	1.299	0.77	0.949	0.162876
480	TTBK2_KAN550-2_6.tif:0013-0902	1.446	15.601	0	75	101.534	92.341	0.965	22.567	2153	1.164	0.859	0.955	0.14954
481	TTBK2_KAN550-2_6.tif:0014-0978	1.132	9.38	0	68	116.73	100.135	0.962	10.618	1013	1.218	0.821	0.956	0.0703597
										2049.07				0.142322
482	TTBK2_KAN550-3_1.tif:0001-0062	1.101	21.486	0	102	7.126	6.407	0.907	23.647	2256	1.516	0.66	0.955	0.156694
483	TTBK2_KAN550-3_1.tif:0002-0099	2.013	30.896	0	208	56.933	10.199	0.785	62.178	5932	1.49	0.671	0.885	0.412017
484	TTBK2_KAN550-3_1.tif:0003-0170	1.834	103.223	0	1012	108.846	17.403	0.855	189.344	18064	1.346	0.743	0.959	1.25467
485	TTBK2_KAN550-3_1.tif:0004-0190	1.279	19.508	0	135	10.752	19.484	0.903	24.947	2380	1.155	0.866	0.907	0.165307
486	TTBK2_KAN550-3_1.tif:0005-0267	1.069	34.725	0	163	74.259	27.35	0.95	37.127	3542	1.119	0.893	0.967	0.246016
487	TTBK2_KAN550-3_1.tif:0006-0425	1.405	16.933	0	81	107.048	43.532	0.964	23.783	2269	1.082	0.924	0.95	0.157597
488	TTBK2_KAN550-3_1.tif:0007-0474	1.53	20.233	0	94	27.444	48.511	0.956	30.963	2954	1.203	0.831	0.948	0.205175
489	TTBK2_KAN550-3_1.tif:0008-0575	1.153	13.564	0	53	43.046	58.92	0.922	15.639	1492	1.058	0.945	0.957	0.103629
490	TTBK2_KAN550-3_1.tif:0009-0630	1.771	61.562	0	607	86.801	64.522	0.877	109.053	10404	1.507	0.664	0.934	0.722628
491	TTBK2_KAN550-3_1.tif:0010-0682	1.268	45.587	0	221	110.112	69.894	0.856	57.818	5516	1.737	0.576	0.949	0.383123
492	TTBK2_KAN550-3_1.tif:0011-0746	1.237	21.568	0	105	64.295	76.42	0.976	26.676	2545	1.293	0.773	0.963	0.176767
493	TTBK2_KAN550-3_1.tif:0012-0828	1.604	21.954	0	105	98.445	84.795	0.965	35.209	3359	1.176	0.85	0.944	0.233305
494	TTBK2_KAN550-3_1.tif:0013-0944	1.247	10.681	0	52	42.397	96.635	0.832	13.322	1271	1.602	0.624	0.912	0.0882795
495	TTBK2_KAN550-3_1.tif:0014-0955	1.3	11.984	0	84	75.37	97.799	0.902	15.576	1486	1.4	0.714	0.95	0.103213
496	TTBK2_KAN550-3_1.tif:0015-0985	1.3	15.226	0	78	64.96	100.902	0.882	19.79	1888	1.432	0.698	0.905	0.131134
497	TTBK2_KAN550-3_2.tif:0001-0102	1.3	28.476	0	147	48.831	10.478	0.913	37.011	3531	1.156	0.865	0.973	0.245252
498	TTBK2_KAN550-3_2.tif:0002-0161	1.509	10.194	0	61	139.119	16.524	0.895	15.387	1468	1.051	0.952	0.944	0.101963
499	TTBK2_KAN550-3_2.tif:0003-0203	1.73	25.806	0	143	130.797	20.842	0.93	44.632	4258	1.29	0.775	0.946	0.295747
500	TTBK2_KAN550-3_2.tif:0004-0222	1.394	32.797	0	316	35.141	22.715	0.915	45.722	4362	1.026	0.974	0.967	0.30297
501	TTBK2_KAN550-3_2.tif:0005-0300	1.436	34.401	0	235	54.684	30.725	0.897	49.401	4713	1.233	0.811	0.919	0.32735
502	TTBK2_KAN550-3_2.tif:0006-0318	1.153	23.918	0	156	90.806	32.605	0.91	27.578	2631	1.364	0.733	0.932	0.182741
503	TTBK2_KAN550-3_2.tif:0007-0388	1.677	30.15	0	264	85.096	39.747	0.911	50.564	4824	1.132	0.883	0.95	0.335059
504	TTBK2_KAN550-3_2.tif:0008-0602	1.845	25.193	0	176	112.141	61.687	0.892	46.477	4434	1.442	0.693	0.954	0.307971
505	TTBK2_KAN550-3_2.tif:0009-0611	1.405	11.896	0	69	29.542	62.557	0.888	16.708	1594	1.348	0.742	0.944	0.110714
506	TTBK2_KAN550-3_2.tif:0010-0679	1.625	46.832	0	389	130.711	69.539	0.883	76.088	7259	1.348	0.742	0.942	0.504187
507	TTBK2_KAN550-3_2.tif:0011-0751	1.205	14.165	0	101	81.815	77.006	0.861	17.075	1629	1.404	0.712	0.913	0.113145
508	TTBK2_KAN550-3_2.tif:0012-0844	1.446	18.087	0	119	49.278	86.378	0.88	26.163	2496	1.214	0.824	0.926	0.173364
509	TTBK2_KAN550-3_2.tif:0013-0954	1.436	14.146	0	91	56.727	97.665	0.922	20.314	1938	1.219	0.82	0.923	0.134607
510	TTBK2_KAN550-3_2.tif:0014-0988	1.499	19.049	0	87	130.129	101.214	0.947	28.553	2724	1.111	0.9	0.966	0.1892
511	TTBK2_KAN550-3_3.tif:0001-0018	1.845	15.716	0	96	94.882	1.897	0.883	28.993	2766	1.285	0.778	0.914	0.192117
512	TTBK2_KAN550-3_3.tif:0002-0074	1.845	24.244	0	193	37.74	7.669	0.835	44.726	4267	1.413	0.708	0.91	0.296372
513	TTBK2_KAN550-3_3.tif:0003-0093	1.488	28.162	0	321	96.201	9.584	0.86	41.917	3999	1.246	0.802	0.934	0.277758
514	TTBK2_KAN550-3_3.tif:0004-0161	1.405	71.149	0	433	75.618	16.436	0.912	99.934	9534	1.111	0.9	0.934	0.662201
515	TTBK2_KAN550-3_3.tif:0005-0163	1.824	35.069	0	212	140.274	16.739	0.894	63.96	6102	1.507	0.664	0.935	0.423825
516	TTBK2_KAN550-3_3.tif:0006-0230	1.845	21.119	0	127	65.815	23.515	0.895	38.961	3717	1.267	0.789	0.91	0.258171
517	TTBK2_KAN550-3_3.tif:0007-0320	1.52	34.614	0	326	135.286	32.786	0.925	52.608	5019	1.176	0.85	0.942	0.348603
518	TTBK2_KAN550-3_3.tif:0008-0345	1.247	14.412	0	63	34.496	35.379	0.866	17.976	1715	1.082	0.924	0.912	0.119118
519	TTBK2_KAN550-3_3.tif:0009-0525	1.153	12.482	0	71	92.047	53.774	0.967	14.392	1373	1.237	0.809	0.932	0.0953641
520	TTBK2_KAN550-3_3.tif:0010-0544	1.216	60.957	0	474	55.327	55.732	0.844	74.117	7071	1.435	0.697	0.913	0.491129
521	TTBK2_KAN550-3_3.tif:0011-0609	1.74	28.054	0	120	138.375	62.368	0.922	48.814	4657	1.442	0.694	0.979	0.32346
522	TTBK2_KAN550-3_3.tif:0012-0632	1.258	9.942	0	52	28.049	64.793	0.914	12.505	1193	1.327	0.754	0.913	0.0828619
523	TTBK2_KAN550-3_3.tif:0013-0779	1.226	20.701	0	107	45.3	79.709	0.886	25.387	2422	1.104	0.906	0.951	0.168224
524	TTBK2_KAN550-3_3.tif:0014-0801	1.709	24.853	0	160	115.132	81.984	0.91	42.462	4051	1.318	0.759	0.926	0.281369
525	TTBK2_KAN550-3_3.tif:0015-0901	1.499	13.343	0	74	75.429	92.287	0.937	19.999	1908	1.034	0.967	0.941	0.132523
526	TTBK2_KAN550-3_3.tif:0016-0971	1.163	16.108	0	77	14.743	99.462	0.947	18.742	1788	1.147	0.872	0.937	0.124189
527	TTBK2_KAN550-3_4.tif:0001-0007	1.174	11.545	0	66	15.193	0.688	0.838	13.553	1293	1.45	0.69	0.911	0.0898076
528	TTBK2_KAN550-3_4.tif:0002-0031	1.394	21.827	0	120	86.766	3.223	0.941	30.429	2903	1.207	0.828	0.971	0.201633
529	TTBK2_KAN550-3_4.tif:0003-0031	1.363	18.638	0	102	139.482	3.164	0.885	25.398	2423	1.581	0.632	0.939	0.168294
530	TTBK2_KAN550-3_4.tif:0004-0146	1.478	10.73	0	70	128.329	15	0.924	15.859	1513	1.362	0.734	0.949	0.105088
531	TTBK2_KAN550-3_4.tif:0005-0216	1.593	56.658	0	263	47.866	22.066	0.728	90.27	8612	1.783	0.561	0.861	0.598162
532	TTBK2_KAN550-3_4.tif:0006-0228	1.845	33.472	0	278	84.197	23.405	0.913	61.749	5891	1.277	0.783	0.944	0.40917
533	TTBK2_KAN550-3_4.tif:0007-0285	1.446	17.884	0	70	101.051	29.159	0.867	25.869	2468	1.32	0.758	0.962	0.171419
534	TTBK2_KAN550-3_4.tif:0008-0389	1.122	41.879	0	197	122.303	39.785	0.859	46.969	4481	1.19	0.84	0.915	0.311236
535	TTBK2_KAN550-3_4.tif:0009-0414	1.331	18.937	0	92	29.256	42.366	0.913	25.209	2405	1.133	0.882	0.92	0.167043
536	TTBK2_KAN550-3_4.tif:0010-0506	1.761	21.726	0	263	90.391	51.782	0.951	38.259	3650	1.241	0.806	0.918	0.253517
537	TTBK2_KAN550-3_4.tif:0011-0578	1.216	9	0	38	22.142	59.125	0.905	10.943	1044	1.118	0.894	0.951	0.0725129
538	TTBK2_KAN550-3_4.tif:0012-0737	1.52	26.8	0	215	104.376	75.493	0.901	40.733	3886	1.173	0.852	0.945	0.269909
539	TTBK2_KAN550-3_4.tif:0013-0755	1.08	12.039	0	54	4.063	77.312	0.901	12.998	1240	1.119	0.894	0.967	0.0861264
540	TTBK2_KAN550-3_4.tif:0014-0773	1.247	18.429	0	84	76.219	79.126	0.956	22.987	2193	1.077	0.929	0.96	0.152319
541	TTBK2_KAN550-3_4.tif:0015-0793	1.509	15.653	0	99	30.938	81.194	0.919	23.626	2254	1.238	0.808	0.941	0.156556
542	TTBK2_KAN550-3_4.tif:0016-0907	1.226	11.829	0	44	52.585	92.846	0.912	14.507	1384	1.246	0.802	0.959	0.0961281
543	TTBK2_KAN550-3_4.tif:0017-0942	1.436	23.796	0	141	122.151	96.454	0.893	34.171	3260	1.121	0.892	0.979	0.226429
544	TTBK2_KAN550-3_5.tif:0001-0016	1.782	56.524	0	485	106.709	1.645	0.903	100.72	9609	1.26	0.794	0.924	0.66741
545	TTBK2_KAN550-3_5.tif:0002-0016	1.195	45.816	0	383	18.053	1.617	0.972	54.747	5223	1.117	0.895	0.95	0.362773
546	TTBK2_KAN550-3_5.tif:0003-0046	1.761	50.226	0	652	75.936	4.674	0.893	88.446	8438	1.28	0.781	0.936	0.586076
547	TTBK2_KAN550-3_5.tif:0004-0121	1.101	15.876	0	65	5.757	12.403	0.907	17.473	1667	1.169	0.856	0.938	0.115784
548	TTBK2_KAN550-3_5.tif:0005-0195	1.583	44.709	0	548	67.158	19.991	0.914	70.763	6751	1.202	0.832	0.956	0.468903
549	TTBK2_KAN550-3_5.tif:0006-0219	1.478	17.199	0	118	26.939	22.47	0.795	25.419	2425	1.438	0.696	0.879	0.168433
550	TTBK2_KAN550-3_5.tif:0007-0255	1.541	16.578	0	166	117.429	26.116	0.938	25.544	2437	1.162	0.86	0.948	0.169266
551	TTBK2_KAN550-3_5.tif:0008-0335	1.74	24.699	0	139	84.341	34.283	0.913	42.976	4100	1.021	0.98	0.935	0.284773
552	TTBK2_KAN550-3_5.tif:0009-0378	1.342	23.586	0	119	17.707	38.738	0.921	31.645	3019	1.121	0.892	0.931	0.20969
553	TTBK2_KAN550-3_5.tif:0010-0511	1.237	18.966	0	106	42.807	52.38	0.976	23.458	2238	1.081	0.925	0.955	0.155444
554	TTBK2_KAN550-3_5.tif:0011-0526	1.667	63.044	0	460	99.561	53.834	0.875	105.07	10024	1.448	0.69	0.933	0.696235
555	TTBK2_KAN550-3_5.tif:0012-0572	1.478	14.482	0	74	55.093	58.615	0.934	21.404	2042	1.15	0.869	0.959	0.141831
556	TTBK2_KAN550-3_5.tif:0013-0663	1.478	19.567	0	90	109.024	67.929	0.949	28.919	2759	1.068	0.936	0.94	0.191631
557	TTBK2_KAN550-3_5.tif:0014-0711	1.625	33.91	0	315	22.693	72.793	0.896	55.093	5256	1.182	0.846	0.934	0.365065
558	TTBK2_KAN550-3_5.tif:0015-0715	1.782	26.576	0	116	128.728	73.169	0.882	47.357	4518	1.444	0.692	0.937	0.313806
559	TTBK2_KAN550-3_5.tif:0016-0833	1.122	41.234	0	228	93.39	85.323	0.924	46.246	4412	1.21	0.826	0.96	0.306443
560	TTBK2_KAN550-3_5.tif:0017-0904	1.635	24.199	0	153	57.794	92.608	0.821	39.569	3775	1.808	0.553	0.918	0.262199
561	TTBK2_KAN550-3_5.tif:0018-0958	1.709	18.147	0	117	140.021	98.093	0.932	31.005	2958	1.24	0.806	0.924	0.205453
562	TTBK2_KAN550-3_5.tif:0019-1033	1.153	51.064	0	203	79.801	105.814	0.922	58.877	5617	1.433	0.698	0.973	0.390139
563	TTBK2_KAN550-3_6.tif:0001-0301	1.478	9.582	0	40	21.907	30.853	0.867	14.161	1351	1.609	0.622	0.937	0.0938361
564	TTBK2_KAN550-3_6.tif:0002-0303	1.73	9.533	0	72	75.392	31.007	0.93	16.488	1573	1.041	0.96	0.94	0.109255
565	TTBK2_KAN550-3_6.tif:0003-0343	1.101	12.095	0	78	114.367	35.13	0.924	13.312	1270	1.126	0.888	0.901	0.0882101
566	TTBK2_KAN550-3_6.tif:0004-0378	1.226	9.906	0	52	49.617	38.728	0.901	12.148	1159	1.203	0.832	0.925	0.0805004
567	TTBK2_KAN550-3_6.tif:0005-0505	1.174	24.616	0	148	73.831	51.737	0.938	28.898	2757	1.084	0.923	0.974	0.191492
568	TTBK2_KAN550-3_6.tif:0006-0553	1.289	11.244	0	52	25.81	56.64	0.932	14.496	1383	1.11	0.901	0.972	0.0960587
569	TTBK2_KAN550-3_6.tif:0007-0562	1.625	16.032	0	77	126.057	57.552	0.883	26.047	2485	1.251	0.799	0.939	0.1726
570	TTBK2_KAN550-3_6.tif:0008-0670	1.52	11.972	0	94	93.802	68.625	0.925	18.197	1736	1.192	0.839	0.948	0.120577
571	TTBK2_KAN550-3_6.tif:0009-0759	1.247	15.034	0	106	49.125	77.726	0.944	18.752	1789	1.29	0.775	0.941	0.124258
572	TTBK2_KAN550-3_6.tif:0010-0777	1.593	19.303	0	103	93.507	79.552	0.866	30.754	2934	1.303	0.768	0.927	0.203786
573	TTBK2_KAN550-3_6.tif:0011-0934	1.331	10.843	0	62	118.963	95.672	0.924	14.434	1377	1.171	0.854	0.955	0.095642
										3617.21				0.251239
574	TTBK2_KAN550-4_1.tif:0001-0092	1.446	16.529	0	90	52.972	9.423	0.965	23.909	2281	1.119	0.893	0.958	0.158431
575	TTBK2_KAN550-4_1.tif:0002-0376	1.572	13.107	0	120	116.14	38.568	0.932	20.607	1966	1.11	0.901	0.955	0.136552
576	TTBK2_KAN550-4_1.tif:0003-0434	1.247	28.008	0	152	19.486	44.513	0.832	34.936	3333	1.495	0.669	0.905	0.231499
577	TTBK2_KAN550-4_1.tif:0004-0534	1.667	49.453	0	373	44.918	54.703	0.875	82.419	7863	1.279	0.782	0.941	0.546138
578	TTBK2_KAN550-4_1.tif:0005-0666	1.604	20.608	0	110	138.177	68.209	0.917	33.049	3153	1.126	0.888	0.939	0.218997
579	TTBK2_KAN550-4_1.tif:0006-0676	1.604	14.503	0	85	90.923	69.308	0.917	23.259	2219	1.286	0.778	0.947	0.154125
580	TTBK2_KAN550-4_1.tif:0007-0849	1.205	11.661	0	71	37.076	86.974	0.952	14.056	1341	1.128	0.887	0.95	0.0931415
581	TTBK2_KAN550-4_1.tif:0008-0867	1.352	14.527	0	86	51.44	88.801	0.913	19.643	1874	1.278	0.782	0.959	0.130162
582	TTBK2_KAN550-4_1.tif:0009-0901	1.478	42.78	0	313	114.411	92.248	0.886	63.227	6032	1.246	0.803	0.959	0.418963
583	TTBK2_KAN550-4_2.tif:0001-0095	1.677	10.469	0	64	120.146	9.751	0.902	17.557	1675	1.201	0.832	0.925	0.11634
584	TTBK2_KAN550-4_2.tif:0002-0174	1.457	18.763	0	124	37.459	17.816	0.911	27.337	2608	1.191	0.84	0.936	0.181143
585	TTBK2_KAN550-4_2.tif:0003-0312	1.436	19.175	0	100	43.078	31.984	0.884	27.536	2627	1.226	0.816	0.948	0.182463
586	TTBK2_KAN550-4_2.tif:0004-0361	1.667	17.648	0	79	73.54	37.011	0.814	29.412	2806	1.36	0.735	0.922	0.194896
587	TTBK2_KAN550-4_2.tif:0005-0367	1.75	43.85	0	329	92.82	37.636	0.896	76.759	7323	1.186	0.843	0.938	0.508632
588	TTBK2_KAN550-4_2.tif:0006-0537	1.373	16.947	0	131	61.764	55.005	0.916	23.27	2220	1.07	0.935	0.939	0.154194
589	TTBK2_KAN550-4_2.tif:0007-0562	1.709	11.086	0	72	108.698	57.57	0.942	18.941	1807	1.17	0.855	0.942	0.125508
590	TTBK2_KAN550-4_2.tif:0008-0562	1.635	29.006	0	197	129.135	57.601	0.949	47.43	4525	1.211	0.826	0.931	0.314292
591	TTBK2_KAN550-4_2.tif:0009-0585	1.792	28.901	0	219	84.536	59.859	0.887	51.801	4942	1.347	0.742	0.947	0.343255
592	TTBK2_KAN550-4_2.tif:0010-0716	1.614	24.552	0	140	127.974	73.319	0.987	39.632	3781	1.165	0.858	0.939	0.262616
593	TTBK2_KAN550-4_2.tif:0011-0747	1.352	27.814	0	162	104.6	76.469	0.928	37.609	3588	1.136	0.88	0.931	0.249211
594	TTBK2_KAN550-4_2.tif:0012-0867	1.467	22.236	0	126	137.041	88.805	0.927	32.63	3113	1.113	0.899	0.959	0.216219
595	TTBK2_KAN550-4_2.tif:0013-0875	1.289	15.228	0	85	73.3	89.558	0.948	19.633	1873	1.368	0.731	0.961	0.130093
596	TTBK2_KAN550-4_2.tif:0014-0920	1.048	6.46	0	28	1.489	94.305	0.803	6.771	646	1.22	0.819	0.889	0.0448691
597	TTBK2_KAN550-4_2.tif:0015-0926	1.237	6.729	0	37	57.891	94.81	0.909	8.323	794	1.153	0.867	0.925	0.0551487
598	TTBK2_KAN550-4_3.tif:0001-0030	1.153	10.982	0	107	6.144	3.07	0.791	12.662	1208	1.276	0.784	0.853	0.0839038
599	TTBK2_KAN550-4_3.tif:0002-0314	1.625	23.484	0	105	134.357	32.167	0.905	38.154	3640	1.124	0.89	0.937	0.252823
600	TTBK2_KAN550-4_3.tif:0003-0326	1.195	13.842	0	87	27.176	33.353	0.889	16.54	1578	1.174	0.852	0.934	0.109603
601	TTBK2_KAN550-4_3.tif:0004-0335	1.405	23.694	0	179	65.586	34.299	0.964	33.28	3175	1.073	0.932	0.95	0.220525
602	TTBK2_KAN550-4_3.tif:0005-0397	1.478	16.064	0	99	98.772	40.622	0.96	23.741	2265	1.086	0.921	0.966	0.15732
603	TTBK2_KAN550-4_3.tif:0006-0516	1.059	5.495	0	32	9.417	52.835	0.929	5.817	555	1.202	0.832	0.931	0.0385485
604	TTBK2_KAN550-4_3.tif:0007-0668	1.446	29.616	0	132	133.689	68.425	0.954	42.839	4087	1.255	0.797	0.939	0.28387
605	TTBK2_KAN550-4_3.tif:0008-0746	1.426	20.868	0	106	98.417	76.441	0.941	29.748	2838	1.038	0.963	0.932	0.197118
606	TTBK2_KAN550-4_3.tif:0009-0798	1.31	15.576	0	109	64.025	81.761	0.963	20.408	1947	1.207	0.828	0.951	0.135232
607	TTBK2_KAN550-4_3.tif:0010-0927	1.363	13.885	0	99	97.534	94.95	0.935	18.92	1805	1.105	0.905	0.939	0.125369
608	TTBK2_KAN550-4_4.tif:0001-0081	1.111	7.915	0	93	25.917	8.294	0.916	8.794	839	1.183	0.845	0.946	0.0582742
609	TTBK2_KAN550-4_4.tif:0002-0160	1.551	16.966	0	84	46.746	16.414	0.969	26.32	2511	1.018	0.982	0.958	0.174406
610	TTBK2_KAN550-4_4.tif:0003-0185	1.101	67.429	0	370	96.907	19.044	0.88	74.212	7080	1.067	0.937	0.946	0.491754
611	TTBK2_KAN550-4_4.tif:0004-0306	2.044	50.605	0	365	116.299	31.288	0.804	103.435	9868	1.393	0.718	0.909	0.685399
612	TTBK2_KAN550-4_4.tif:0005-0381	1.52	16.986	0	71	74.294	39.019	0.95	25.817	2463	1.072	0.933	0.948	0.171072
613	TTBK2_KAN550-4_4.tif:0006-0520	1.069	11.745	0	55	17.492	53.297	0.95	12.557	1198	1.156	0.865	0.967	0.0832092
614	TTBK2_KAN550-4_4.tif:0007-0591	1.908	109.566	0	914	133.828	60.535	0.901	209.019	19941	1.069	0.936	0.948	1.38504
615	TTBK2_KAN550-4_4.tif:0008-0624	1.593	66.533	0	467	48.76	63.954	0.944	106.003	10113	1.019	0.982	0.956	0.702416
616	TTBK2_KAN550-4_4.tif:0009-0694	1.426	12.235	0	66	97.237	71.131	0.978	17.442	1664	1.132	0.884	0.954	0.115576
617	TTBK2_KAN550-4_4.tif:0010-0855	1.3	18.919	0	115	115.318	87.622	0.892	24.59	2346	1.253	0.798	0.922	0.162946
618	TTBK2_KAN550-4_4.tif:0011-0896	1.457	33.835	0	144	57.729	91.716	0.887	49.296	4703	1.199	0.834	0.927	0.326655
619	TTBK2_KAN550-4_5.tif:0001-0105	1.321	9.81	0	94	56.707	10.751	0.906	12.956	1236	1.1	0.909	0.926	0.0858485
620	TTBK2_KAN550-4_5.tif:0002-0217	1.614	13.253	0	73	134.11	22.255	0.937	21.393	2041	1.16	0.862	0.919	0.141761
621	TTBK2_KAN550-4_5.tif:0003-0390	1.74	15.639	0	107	95.061	39.949	0.904	27.211	2596	1.459	0.685	0.933	0.18031
622	TTBK2_KAN550-4_5.tif:0004-0451	1.394	25.541	0	121	131.598	46.23	0.895	35.607	3397	1.191	0.84	0.914	0.235945
623	TTBK2_KAN550-4_5.tif:0005-0553	1.352	36.504	0	215	141.324	56.608	0.954	49.359	4709	1.19	0.84	0.938	0.327072
624	TTBK2_KAN550-4_5.tif:0006-0643	1.143	11.385	0	59	76.754	65.786	0.93	13.008	1241	1.136	0.881	0.928	0.0861958
625	TTBK2_KAN550-4_5.tif:0007-0813	1.373	15.817	0	112	74.733	83.231	0.927	21.718	2072	1.016	0.985	0.96	0.143914
626	TTBK2_KAN550-4_6.tif:0001-0066	1.457	13.77	0	135	111.655	6.781	0.946	20.062	1914	1.112	0.9	0.959	0.13294
627	TTBK2_KAN550-4_6.tif:0002-0086	1.656	22.399	0	220	79.867	8.788	0.848	37.095	3539	1.377	0.726	0.932	0.245807
628	TTBK2_KAN550-4_6.tif:0003-0093	1.3	50.742	0	230	121.361	9.539	0.967	65.952	6292	1.095	0.913	0.973	0.437022
629	TTBK2_KAN550-4_6.tif:0004-0164	1.31	21.832	0	120	24.967	16.868	0.936	28.605	2729	1.196	0.836	0.951	0.189547
630	TTBK2_KAN550-4_6.tif:0005-0224	1.268	7.777	0	35	131.341	22.943	0.96	9.863	941	1.09	0.917	0.934	0.0653588
631	TTBK2_KAN550-4_6.tif:0006-0576	1.73	17.806	0	278	92.718	59.026	0.954	30.796	2938	1.184	0.845	0.946	0.204064
632	TTBK2_KAN550-4_6.tif:0007-0581	1.719	43.348	0	323	73.151	59.533	0.925	74.516	7109	1.239	0.807	0.943	0.493768
633	TTBK2_KAN550-4_6.tif:0008-0585	1.247	21.21	0	124	33.537	59.914	0.902	26.456	2524	1.1	0.909	0.956	0.175309
634	TTBK2_KAN550-4_6.tif:0009-0774	1.143	24.174	0	120	58.202	79.293	0.942	27.62	2635	1.105	0.905	0.952	0.183019
635	TTBK2_KAN550-4_6.tif:0010-0780	1.677	28.956	0	168	124.877	79.925	0.948	48.562	4633	1.274	0.785	0.941	0.321793
										3431.61				0.238349
636	TTBK2_KAN550-5_1.tif:0001-0070	1.803	141.128	0	1180	68.343	7.298	0.872	254.437	24274	1.203	0.831	0.925	1.68599
637	TTBK2_KAN550-5_1.tif:0002-0096	1.667	108.956	0	733	122.157	9.885	0.906	181.588	17324	1.332	0.751	0.958	1.20327
638	TTBK2_KAN550-5_1.tif:0003-0196	1.268	83.099	0	385	7.872	20.122	0.944	105.395	10055	1.142	0.876	0.96	0.698388
639	TTBK2_KAN550-5_1.tif:0004-0239	1.583	183.245	0	1322	51.182	24.509	0.938	290.033	27670	1.208	0.828	0.965	1.92187
640	TTBK2_KAN550-5_1.tif:0005-0264	1.184	75.646	0	324	81.916	27.01	0.919	89.599	8548	1.233	0.811	0.974	0.593716
641	TTBK2_KAN550-5_1.tif:0006-0469	1.467	70.907	0	437	76.232	48.054	0.942	104.053	9927	1.023	0.977	0.927	0.689497
642	TTBK2_KAN550-5_1.tif:0007-0512	1.677	83.338	0	602	42.79	52.49	0.859	139.765	13334	1.32	0.758	0.912	0.926136
643	TTBK2_KAN550-5_1.tif:0008-0530	1.352	76.372	0	566	24.788	54.3	0.832	103.267	9852	1.528	0.654	0.931	0.684288
644	TTBK2_KAN550-5_1.tif:0009-0626	2.233	141.258	0	1345	134.732	64.133	0.86	315.378	30088	1.325	0.755	0.928	2.08981
645	TTBK2_KAN550-5_1.tif:0010-0684	1.488	106.063	0	695	24.284	70.021	0.906	157.867	15061	1.193	0.838	0.928	1.04609
646	TTBK2_KAN550-5_1.tif:0011-0695	1.551	120.135	0	988	53.452	71.18	0.896	186.367	17780	1.171	0.854	0.949	1.23494
647	TTBK2_KAN550-5_1.tif:0012-0870	1.363	89.969	0	553	69.461	89.144	0.946	122.596	11696	1.165	0.858	0.959	0.812366
648	TTBK2_KAN550-5_1.tif:0013-0890	1.373	38.863	0	242	36.739	91.127	0.892	53.363	5091	1.11	0.901	0.936	0.353604
649	TTBK2_KAN550-5_1.tif:0014-0923	1.782	75.106	0	570	101.72	94.561	0.842	133.832	12768	1.3	0.769	0.916	0.886824
650	TTBK2_KAN550-5_2.tif:0001-0073	2.149	119.439	0	1139	108.616	7.427	0.827	256.648	24485	1.396	0.716	0.917	1.70065
651	TTBK2_KAN550-5_2.tif:0002-0108	1.415	148.407	0	1056	80.47	11.12	0.919	210.004	20035	1.072	0.933	0.944	1.39157
652	TTBK2_KAN550-5_2.tif:0003-0368	1.908	124.78	0	671	130.83	37.687	0.901	238.043	22710	1.318	0.758	0.95	1.57736
653	TTBK2_KAN550-5_2.tif:0004-0403	2.358	108.791	0	915	113.409	41.258	0.8	256.575	24478	1.224	0.817	0.896	1.70016
654	TTBK2_KAN550-5_2.tif:0005-0454	1.289	103.585	0	604	18.679	46.52	0.895	133.549	12741	1.404	0.712	0.943	0.884949
655	TTBK2_KAN550-5_2.tif:0006-0585	1.677	133.644	0	983	81.962	59.9	0.934	224.134	21383	1.137	0.88	0.955	1.48519
656	TTBK2_KAN550-5_2.tif:0007-0639	1.31	56.296	0	349	33.16	65.462	0.91	73.761	7037	1.137	0.879	0.943	0.488767
657	TTBK2_KAN550-5_2.tif:0008-0828	1.646	46.873	0	449	47.87	84.79	0.864	77.136	7359	1.244	0.804	0.926	0.511132
658	TTBK2_KAN550-5_2.tif:0009-0932	1.352	108.233	0	617	96.207	95.437	0.81	146.348	13962	1.705	0.586	0.945	0.969755
659	TTBK2_KAN550-5_2.tif:0010-0988	1.184	63.363	0	400	0.775	101.177	0.856	75.05	7160	1.218	0.821	0.922	0.49731
660	TTBK2_KAN550-5_3.tif:0001-0036	1.499	60.322	0	268	91.569	3.732	0.857	90.417	8626	1.327	0.754	0.911	0.599134
661	TTBK2_KAN550-5_3.tif:0002-0068	1.75	162.91	0	1250	132.793	7.042	0.896	285.169	27206	1.316	0.76	0.954	1.88964
662	TTBK2_KAN550-5_3.tif:0003-0105	1.709	66.988	0	284	79.899	10.845	0.887	114.451	10919	1.326	0.754	0.918	0.758398
663	TTBK2_KAN550-5_3.tif:0004-0226	1.75	131.096	0	961	114.961	23.13	0.941	229.479	21893	1.09	0.917	0.941	1.52062
664	TTBK2_KAN550-5_3.tif:0005-0289	1.289	40.837	0	263	19.596	29.572	0.91	52.65	5023	1.164	0.859	0.914	0.348881
665	TTBK2_KAN550-5_3.tif:0006-0395	1.792	122.556	0	949	114.572	40.488	0.909	219.668	20957	1.078	0.927	0.919	1.45561
666	TTBK2_KAN550-5_3.tif:0007-0441	1.845	68.807	0	485	49.725	45.17	0.913	126.935	12110	1.375	0.727	0.941	0.841121
667	TTBK2_KAN550-5_3.tif:0008-0469	1.698	123.753	0	837	125.281	48.02	0.9	210.14	20048	1.171	0.854	0.95	1.39247
668	TTBK2_KAN550-5_3.tif:0009-0603	1.478	147.213	0	864	107.846	61.812	0.909	217.572	20757	1.132	0.883	0.962	1.44171
669	TTBK2_KAN550-5_3.tif:0010-0692	1.635	83.276	0	473	123.301	70.849	0.867	136.17	12991	1.401	0.714	0.943	0.902313
670	TTBK2_KAN550-5_3.tif:0011-0891	1.405	99.649	0	490	45.687	91.286	0.964	139.964	13353	1.086	0.921	0.95	0.927456
671	TTBK2_KAN550-5_4.tif:0001-0067	1.709	154.092	0	809	104.568	6.92	0.906	263.273	25117	1.439	0.695	0.973	1.74455
672	TTBK2_KAN550-5_4.tif:0002-0250	1.981	72.72	0	454	62.678	25.649	0.877	144.063	13744	1.584	0.631	0.938	0.954614
673	TTBK2_KAN550-5_4.tif:0003-0342	1.373	87.771	0	501	38.99	35.028	0.854	120.52	11498	1.467	0.681	0.97	0.798614
674	TTBK2_KAN550-5_4.tif:0004-0591	1.73	94.079	0	512	106.511	60.599	0.865	162.71	15523	1.28	0.781	0.927	1.07818
675	TTBK2_KAN550-5_4.tif:0005-0640	1.992	51.147	0	546	133.416	65.569	0.862	101.863	9718	1.265	0.79	0.92	0.674981
676	TTBK2_KAN550-5_4.tif:0006-0815	1.562	33.094	0	273	71.896	83.528	0.811	51.686	4931	1.347	0.742	0.869	0.342491
677	TTBK2_KAN550-5_4.tif:0007-0918	1.09	29.183	0	165	29.144	94.002	0.927	31.812	3035	1.07	0.935	0.95	0.210801
678	TTBK2_KAN550-5_4.tif:0008-0967	1.792	86.678	0	801	138.667	99.037	0.819	155.362	14822	1.651	0.606	0.893	1.02949
679	TTBK2_KAN550-5_4.tif:0009-1003	1.614	82.195	0	593	64.398	102.757	0.847	132.679	12658	1.424	0.702	0.909	0.879184
680	TTBK2_KAN550-5_5.tif:0001-0196	1.467	145.729	0	989	114.249	20.108	0.953	213.851	20402	1.113	0.898	0.959	1.41706
681	TTBK2_KAN550-5_5.tif:0002-0214	1.09	33.587	0	126	89.439	21.907	0.956	36.613	3493	1.198	0.835	0.954	0.242612
682	TTBK2_KAN550-5_5.tif:0003-0256	1.436	120.08	0	650	32.329	26.31	0.922	172.437	16451	1.018	0.982	0.935	1.14263
683	TTBK2_KAN550-5_5.tif:0004-0316	1.205	52.565	0	345	40.786	32.384	0.861	63.363	6045	1.154	0.867	0.906	0.419866
684	TTBK2_KAN550-5_5.tif:0005-0331	2.222	76.632	0	677	131.586	34.02	0.866	170.288	16246	1.385	0.722	0.922	1.12839
685	TTBK2_KAN550-5_5.tif:0006-0378	1.918	72.224	0	513	68.706	38.697	0.918	138.539	13217	1.36	0.735	0.941	0.91801
686	TTBK2_KAN550-5_5.tif:0007-0507	1.279	69.123	0	298	19.047	51.92	0.731	88.394	8433	1.636	0.611	0.819	0.585729
687	TTBK2_KAN550-5_5.tif:0008-0558	1.415	110.037	0	725	52.884	57.159	0.894	155.708	14855	1.352	0.74	0.951	1.03178
688	TTBK2_KAN550-5_5.tif:0009-0693	1.122	75.121	0	356	12.033	70.955	0.859	84.253	8038	1.232	0.811	0.903	0.558293
689	TTBK2_KAN550-5_5.tif:0010-0711	1.488	135.155	0	768	117.546	72.812	0.93	201.168	19192	1.022	0.978	0.947	1.33301
690	TTBK2_KAN550-5_5.tif:0011-0802	1.771	60.929	0	511	94.731	82.176	0.856	107.932	10297	1.143	0.875	0.923	0.715196
691	TTBK2_KAN550-5_5.tif:0012-0810	1.258	109.35	0	528	77.275	82.933	0.952	137.543	13122	1.031	0.97	0.927	0.911412
692	TTBK2_KAN550-5_6.tif:0001-0064	1.803	65.267	0	329	118.321	6.601	0.892	117.669	11226	1.079	0.927	0.925	0.779722
693	TTBK2_KAN550-5_6.tif:0002-0160	1.593	74.934	0	574	90.242	16.473	0.824	119.388	11390	1.418	0.705	0.93	0.791112
694	TTBK2_KAN550-5_6.tif:0003-0267	1.908	101.308	0	774	28.657	27.337	0.901	193.265	18438	1.252	0.799	0.953	1.28064
695	TTBK2_KAN550-5_6.tif:0004-0282	1.446	92.514	0	560	97.252	28.865	0.857	133.822	12767	1.386	0.721	0.923	0.886754
696	TTBK2_KAN550-5_6.tif:0005-0334	1.258	61.892	0	471	13.263	34.154	0.795	77.849	7427	1.433	0.698	0.879	0.515855
697	TTBK2_KAN550-5_6.tif:0006-0346	1.677	54.75	0	380	89.184	35.505	0.717	91.821	8760	2.232	0.448	0.914	0.608441
698	TTBK2_KAN550-5_6.tif:0007-0400	1.74	66.916	0	380	132.261	40.999	0.803	116.432	11108	1.723	0.581	0.92	0.771526
699	TTBK2_KAN550-5_6.tif:0008-0554	1.845	92.733	0	644	16.016	56.766	0.843	171.074	16321	1.53	0.654	0.917	1.1336
700	TTBK2_KAN550-5_6.tif:0009-0621	1.614	44.532	0	164	133.32	63.617	0.923	71.885	6858	1.297	0.771	0.948	0.476334
701	TTBK2_KAN550-5_6.tif:0010-0656	1.897	53.055	0	494	55.786	67.181	0.867	100.657	9603	1.515	0.66	0.938	0.666993
702	TTBK2_KAN550-5_6.tif:0011-0671	1.73	114.109	0	878	67.054	68.761	0.865	197.352	18828	1.259	0.794	0.932	1.30773
703	TTBK2_KAN550-5_6.tif:0012-0808	1.709	85.675	0	751	82.723	82.76	0.887	146.379	13965	1.431	0.699	0.921	0.969964
704	TTBK2_KAN550-5_6.tif:0013-0812	1.279	69.574	0	287	12.678	83.136	0.997	88.97	8488	1.055	0.948	0.946	0.589549
705	TTBK2_KAN550-5_6.tif:0014-0915	1.824	89.908	0	704	94.385	93.744	0.861	163.978	15644	1.307	0.765	0.93	1.08658
										11897.7				0.826378
706	TTBK2_KAN550-6_1.tif:0001-0036	1.373	56.336	0	357	48.935	3.66	0.953	77.356	7380	1.087	0.92	0.967	0.512591
707	TTBK2_KAN550-6_1.tif:0002-0075	1.572	95.68	0	554	132.217	7.707	0.957	150.436	14352	1.153	0.867	0.965	0.996843
708	TTBK2_KAN550-6_1.tif:0003-0085	1.08	47.039	0	158	2.152	8.714	0.947	50.785	4845	1.22	0.82	0.941	0.336518
709	TTBK2_KAN550-6_1.tif:0004-0151	1.457	130.194	0	600	83.507	15.505	0.946	189.69	18097	1.125	0.889	0.959	1.25696
710	TTBK2_KAN550-6_1.tif:0005-0195	1.583	77.278	0	387	118.355	19.954	0.938	122.313	11669	1.179	0.848	0.962	0.810491
711	TTBK2_KAN550-6_1.tif:0006-0264	1.216	60.966	0	310	40.512	27.087	0.905	74.128	7072	1.149	0.87	0.947	0.491198
712	TTBK2_KAN550-6_1.tif:0007-0404	1.321	68.143	0	359	51.069	41.417	0.917	89.997	8586	1.255	0.797	0.955	0.596356
713	TTBK2_KAN550-6_1.tif:0008-0536	1.541	114.735	0	712	83.071	54.916	0.89	176.787	16866	1.144	0.874	0.955	1.17146
714	TTBK2_KAN550-6_1.tif:0009-0656	1.562	82.315	0	502	16.895	67.166	0.87	128.56	12265	1.38	0.725	0.934	0.851887
715	TTBK2_KAN550-6_1.tif:0010-0675	1.625	80.323	0	686	130.543	69.156	0.905	130.499	12450	1.208	0.828	0.939	0.864737
716	TTBK2_KAN550-6_1.tif:0011-0732	1.509	100.389	0	650	56.695	74.944	0.895	151.526	14456	1.274	0.785	0.932	1.00407
717	TTBK2_KAN550-6_1.tif:0012-0807	1.583	83.099	0	351	56.68	82.587	0.928	131.526	12548	1.223	0.817	0.941	0.871543
718	TTBK2_KAN550-6_1.tif:0013-0908	1.321	99.389	0	595	96.105	93.013	0.917	131.264	12523	1.178	0.849	0.947	0.869807
719	TTBK2_KAN550-6_1.tif:0014-1030	1.73	131.533	0	572	122.758	105.466	0.844	227.488	21703	1.468	0.681	0.93	1.50742
720	TTBK2_KAN550-6_2.tif:0001-0077	2.191	106.144	0	877	132.699	7.879	0.844	232.53	22184	1.497	0.668	0.937	1.54083
721	TTBK2_KAN550-6_2.tif:0002-0169	1.405	59.754	0	339	110.797	17.333	0.888	83.928	8007	1.275	0.785	0.931	0.55614
722	TTBK2_KAN550-6_2.tif:0003-0199	1.709	194.184	0	1249	59.365	20.424	0.952	331.772	31652	1.137	0.879	0.959	2.19845
723	TTBK2_KAN550-6_2.tif:0004-0235	1.53	65.164	0	319	30.981	24.055	0.897	99.724	9514	1.183	0.845	0.91	0.660812
724	TTBK2_KAN550-6_2.tif:0005-0326	1.415	53.756	0	304	88.582	33.425	0.871	76.067	7257	1.529	0.654	0.954	0.504048
725	TTBK2_KAN550-6_2.tif:0006-0340	2.222	71.958	0	676	100.133	34.838	0.784	159.901	15255	1.802	0.555	0.896	1.05956
726	TTBK2_KAN550-6_2.tif:0007-0428	1.509	174.625	0	1201	52.471	43.812	0.954	263.577	25146	1.073	0.932	0.966	1.74656
727	TTBK2_KAN550-6_2.tif:0008-0549	1.698	67.284	0	399	31.997	56.25	0.96	114.252	10900	1.254	0.797	0.942	0.757079
728	TTBK2_KAN550-6_2.tif:0009-0664	2.044	98.626	0	941	103.638	68.002	0.804	201.587	19232	1.776	0.563	0.929	1.33579
729	TTBK2_KAN550-6_2.tif:0010-0801	1.709	86.135	0	774	45.288	82.029	0.834	147.165	14040	1.549	0.646	0.942	0.975173
730	TTBK2_KAN550-6_2.tif:0011-0878	1.813	90.225	0	759	104.741	89.872	0.848	163.611	15609	1.374	0.728	0.906	1.08415
731	TTBK2_KAN550-6_2.tif:0012-0899	1.488	84.486	0	482	136.252	92.034	0.93	125.751	11997	1.294	0.773	0.931	0.833273
732	TTBK2_KAN550-6_2.tif:0013-0990	1.813	62.104	0	621	88.061	101.391	0.829	112.617	10744	1.56	0.641	0.903	0.746243
733	TTBK2_KAN550-6_3.tif:0001-0075	2.138	57.289	0	350	120.69	7.694	0.859	122.501	11687	1.227	0.815	0.923	0.811741
734	TTBK2_KAN550-6_3.tif:0002-0115	1.709	78.607	0	555	62.424	11.857	0.884	134.304	12813	1.294	0.773	0.956	0.889949
735	TTBK2_KAN550-6_3.tif:0003-0416	2.096	104.065	0	850	97.599	42.564	0.824	218.159	20813	1.29	0.775	0.903	1.4456
736	TTBK2_KAN550-6_3.tif:0004-0753	1.3	54.548	0	307	30.059	77.1	0.944	70.899	6764	1.113	0.899	0.922	0.469805
737	TTBK2_KAN550-6_3.tif:0005-0901	1.321	47.008	0	362	123.593	92.255	0.943	62.084	5923	1.222	0.819	0.955	0.411392
738	TTBK2_KAN550-6_3.tif:0006-0961	1.436	75.299	0	481	118.164	98.439	0.821	108.131	10316	1.762	0.568	0.895	0.716516
739	TTBK2_KAN550-6_4.tif:0001-0051	2.191	92.397	0	924	87.335	5.213	0.812	202.415	19311	1.434	0.697	0.905	1.34128
740	TTBK2_KAN550-6_4.tif:0002-0088	1.163	22.622	0	130	124.783	9.098	0.918	26.32	2511	1.398	0.715	0.945	0.174406
741	TTBK2_KAN550-6_4.tif:0003-0124	1.373	79.237	0	391	56.59	12.703	0.793	108.802	10380	1.634	0.612	0.91	0.720961
742	TTBK2_KAN550-6_4.tif:0004-0309	1.73	93.606	0	772	58.23	31.608	0.856	161.892	15445	1.073	0.932	0.914	1.07276
743	TTBK2_KAN550-6_4.tif:0005-0353	1.499	57.294	0	278	127.041	36.147	0.912	85.878	8193	1.186	0.843	0.941	0.569059
744	TTBK2_KAN550-6_4.tif:0006-0383	1.541	102.639	0	970	96.77	39.223	0.928	158.15	15088	1.262	0.792	0.933	1.04796
745	TTBK2_KAN550-6_4.tif:0007-0522	1.509	58.215	0	337	47.004	53.422	0.895	87.869	8383	1.33	0.752	0.935	0.582256
746	TTBK2_KAN550-6_4.tif:0008-0641	1.373	49.473	0	260	128.07	65.626	0.882	67.933	6481	1.257	0.795	0.903	0.450149
747	TTBK2_KAN550-6_4.tif:0009-0706	1.226	55.103	0	315	19.266	72.262	0.851	67.577	6447	1.117	0.895	0.903	0.447788
748	TTBK2_KAN550-6_4.tif:0010-0802	1.247	52.95	0	341	33.165	82.2	0.739	66.046	6301	1.9	0.526	0.865	0.437647
749	TTBK2_KAN550-6_4.tif:0011-0959	1.803	76.122	0	419	98.418	98.187	0.851	137.239	13093	1.582	0.632	0.935	0.909397
750	TTBK2_KAN550-6_5.tif:0001-0091	2.013	135.052	0	953	68.107	9.277	0.899	271.795	25930	1.292	0.774	0.943	1.80101
751	TTBK2_KAN550-6_5.tif:0002-0128	1.656	115.101	0	883	76.74	13.206	0.937	190.623	18186	1.166	0.858	0.932	1.26314
752	TTBK2_KAN550-6_5.tif:0003-0143	1.52	111.724	0	668	106.367	14.632	0.901	169.806	16200	1.224	0.817	0.942	1.1252
753	TTBK2_KAN550-6_5.tif:0004-0142	1.059	48.347	0	212	127.729	14.552	0.941	51.183	4883	1.138	0.879	0.957	0.339157
754	TTBK2_KAN550-6_5.tif:0005-0177	2.013	123.401	0	1019	40.64	18.121	0.871	248.347	23693	1.298	0.77	0.921	1.64564
755	TTBK2_KAN550-6_5.tif:0006-0201	1.761	63.982	0	329	16.343	20.643	0.872	112.67	10749	1.39	0.719	0.926	0.746591
756	TTBK2_KAN550-6_5.tif:0007-0319	1.279	102.475	0	558	91.426	32.719	0.951	131.044	12502	1.08	0.926	0.968	0.868348
757	TTBK2_KAN550-6_5.tif:0008-0364	1.572	69.907	0	421	131.922	37.31	0.932	109.913	10486	1.035	0.966	0.946	0.728324
758	TTBK2_KAN550-6_5.tif:0009-0393	1.635	64.115	0	419	64.931	40.243	0.935	104.84	10002	1.222	0.818	0.957	0.694706
759	TTBK2_KAN550-6_5.tif:0010-0397	1.593	105.164	0	640	99.656	40.696	0.92	167.553	15985	1.042	0.959	0.956	1.11027
760	TTBK2_KAN550-6_5.tif:0011-0483	1.237	23.686	0	75	106.346	49.463	0.948	29.297	2795	1.128	0.887	0.952	0.194132
761	TTBK2_KAN550-6_5.tif:0012-0529	1.446	132.341	0	662	134.747	54.152	0.924	191.43	18263	1.067	0.938	0.982	1.26849
762	TTBK2_KAN550-6_5.tif:0013-0540	1.342	99.891	0	479	34.89	55.271	0.958	134.021	12786	1.038	0.963	0.959	0.888074
763	TTBK2_KAN550-6_5.tif:0014-0568	1.897	87.674	0	874	115.585	58.159	0.896	166.337	15869	1.284	0.779	0.948	1.10221
764	TTBK2_KAN550-6_5.tif:0015-0638	1.677	62.612	0	393	74.296	65.3	0.959	105.007	10018	1.115	0.897	0.961	0.695818
765	TTBK2_KAN550-6_5.tif:0016-0653	2.201	104.086	0	911	93.426	66.852	0.858	229.112	21858	1.551	0.645	0.921	1.51819
766	TTBK2_KAN550-6_5.tif:0017-0747	1.048	63.16	0	283	3.669	76.563	0.78	66.203	6316	1.802	0.555	0.889	0.438689
767	TTBK2_KAN550-6_5.tif:0018-0828	1.656	72.101	0	510	57.644	84.803	0.923	119.409	11392	1.089	0.918	0.946	0.791251
768	TTBK2_KAN550-6_5.tif:0019-0841	1.939	104.395	0	753	120.539	86.099	0.916	202.436	19313	1.436	0.696	0.964	1.34142
769	TTBK2_KAN550-6_6.tif:0001-0102	2.285	86.876	0	914	113.649	10.477	0.847	198.516	18939	1.66	0.603	0.936	1.31544
770	TTBK2_KAN550-6_6.tif:0002-0110	1.163	110.432	0	377	107.877	11.31	0.817	128.487	12258	1.681	0.595	0.937	0.851401
771	TTBK2_KAN550-6_6.tif:0003-0113	1.467	133.421	0	883	137.792	11.584	0.903	195.791	18679	1.125	0.889	0.959	1.29738
772	TTBK2_KAN550-6_6.tif:0004-0120	1.226	80.615	0	400	18.602	12.298	0.912	98.865	9432	1.21	0.826	0.951	0.655116
773	TTBK2_KAN550-6_6.tif:0005-0209	1.792	82.363	0	398	79.058	21.431	0.918	147.627	14084	1.283	0.779	0.969	0.978229
774	TTBK2_KAN550-6_6.tif:0006-0228	1.719	87.463	0	601	47.734	23.391	0.925	150.352	14344	1.208	0.828	0.943	0.996288
775	TTBK2_KAN550-6_6.tif:0007-0425	1.709	100.411	0	705	66.877	43.585	0.952	171.557	16367	1.099	0.91	0.959	1.1368
776	TTBK2_KAN550-6_6.tif:0008-0433	1.866	83.663	0	503	124.366	44.315	0.969	156.096	14892	1.081	0.925	0.96	1.03435
777	TTBK2_KAN550-6_6.tif:0009-0561	2.327	88.243	0	737	135.193	57.364	0.947	205.34	19590	1.125	0.889	0.953	1.36066
778	TTBK2_KAN550-6_6.tif:0010-0586	1.593	142.796	0	1018	93.468	60.041	0.897	227.509	21705	1.201	0.833	0.965	1.50756
779	TTBK2_KAN550-6_6.tif:0011-0643	1.929	166.777	0	1318	115.048	65.816	0.87	321.657	30687	1.328	0.753	0.953	2.13142
780	TTBK2_KAN550-6_6.tif:0012-0688	1.205	34.47	0	188	34.762	70.529	0.837	41.55	3964	1.238	0.807	0.935	0.275327
781	TTBK2_KAN550-6_6.tif:0013-0741	1.405	90.418	0	686	84.509	75.852	0.937	126.998	12116	1.217	0.821	0.937	0.841538
782	TTBK2_KAN550-6_6.tif:0014-0799	1.625	102.761	0	790	127.037	81.805	0.905	166.955	15928	1.288	0.777	0.939	1.10631
783	TTBK2_KAN550-6_6.tif:0015-0966	1.866	53.292	0	448	102.88	98.933	0.881	99.431	9486	1.398	0.715	0.957	0.658867
784	TTBK2_KAN550-6_6.tif:0016-1000	1.509	65.333	0	525	65.069	102.421	0.85	98.613	9408	1.327	0.754	0.941	0.653449
										13413.9				0.931685
785	TTBK2_KAN550-7_1.tif:0001-0102	1.95	102.747	0	839	118.296	10.436	0.924	200.319	19111	1.147	0.872	0.93	1.32739
786	TTBK2_KAN550-7_1.tif:0002-0113	1.698	73.636	0	663	14.912	11.635	0.849	125.038	11929	1.472	0.679	0.931	0.82855
787	TTBK2_KAN550-7_1.tif:0003-0143	2.474	139.157	0	1758	87.612	14.673	0.863	344.235	32841	1.425	0.702	0.937	2.28103
788	TTBK2_KAN550-7_1.tif:0004-0161	1.824	126.506	0	1073	75.96	16.528	0.834	230.727	22012	1.397	0.716	0.918	1.52888
789	TTBK2_KAN550-7_1.tif:0005-0222	2.002	112.649	0	918	127.492	22.763	0.895	225.528	21516	1.4	0.714	0.943	1.49443
790	TTBK2_KAN550-7_1.tif:0006-0259	1.971	75.771	0	411	56.113	26.47	0.892	149.314	14245	1.383	0.723	0.917	0.989411
791	TTBK2_KAN550-7_1.tif:0007-0354	1.509	82.326	0	572	35.11	36.268	0.919	124.262	11855	1.17	0.855	0.947	0.82341
792	TTBK2_KAN550-7_1.tif:0008-0367	1.321	85.222	0	474	76.77	37.589	0.892	112.554	10738	1.29	0.775	0.944	0.745827
793	TTBK2_KAN550-7_1.tif:0009-0537	1.069	62.578	0	285	12.124	55.02	0.881	66.906	6383	1.28	0.781	0.927	0.443342
794	TTBK2_KAN550-7_1.tif:0010-0538	1.604	94.51	0	603	130.154	55.119	0.813	151.568	14460	1.734	0.577	0.9	1.00434
795	TTBK2_KAN550-7_1.tif:0011-0550	1.897	80.58	0	789	105.47	56.32	0.84	152.878	14585	1.437	0.696	0.912	1.01303
796	TTBK2_KAN550-7_1.tif:0012-0564	1.667	158.258	0	742	59.101	57.784	0.906	263.755	25163	1.139	0.878	0.949	1.74774
797	TTBK2_KAN550-7_1.tif:0013-0778	1.803	100.413	0	836	19.683	79.683	0.824	181.032	17271	1.526	0.655	0.91	1.19959
798	TTBK2_KAN550-7_1.tif:0014-0780	1.95	118.5	0	1192	119.208	79.921	0.825	231.031	22041	1.404	0.712	0.912	1.5309
799	TTBK2_KAN550-7_1.tif:0015-0927	1.625	58.239	0	490	22.199	94.952	0.75	94.62	9027	1.843	0.542	0.901	0.626986
800	TTBK2_KAN550-7_1.tif:0016-1025	1.604	83.085	0	683	79.351	104.98	0.842	133.245	12712	1.268	0.788	0.916	0.882934
801	TTBK2_KAN550-7_2.tif:0001-0073	1.981	88.392	0	710	74.558	7.567	0.846	175.11	16706	1.216	0.822	0.933	1.16034
802	TTBK2_KAN550-7_2.tif:0002-0129	1.625	132.8	0	972	20.704	13.287	0.929	215.759	20584	1.272	0.786	0.948	1.4297
803	TTBK2_KAN550-7_2.tif:0003-0137	1.53	91.021	0	501	50.773	14.056	0.784	139.293	13289	1.67	0.599	0.885	0.923011
804	TTBK2_KAN550-7_2.tif:0004-0300	2.264	107.931	0	972	104.936	30.715	0.875	244.364	23313	1.557	0.642	0.915	1.61925
805	TTBK2_KAN550-7_2.tif:0005-0437	1.792	107.86	0	632	131.892	44.79	0.887	193.327	18444	1.281	0.781	0.937	1.28106
806	TTBK2_KAN550-7_2.tif:0006-0437	1.95	116.183	0	977	80.448	44.734	0.833	226.513	21610	1.573	0.636	0.935	1.50096
807	TTBK2_KAN550-7_2.tif:0007-0586	2.002	85.058	0	757	66.516	60.033	0.867	170.288	16246	1.457	0.686	0.927	1.12839
808	TTBK2_KAN550-7_2.tif:0008-0665	1.761	63.113	0	591	24.303	68.102	0.714	111.139	10603	1.876	0.533	0.851	0.73645
809	TTBK2_KAN550-7_2.tif:0009-0687	1.803	128.465	0	1084	115.857	70.294	0.914	231.607	22096	1.333	0.75	0.94	1.53472
810	TTBK2_KAN550-7_2.tif:0010-0815	1.111	49.066	0	280	140.18	83.471	0.827	54.516	5201	1.488	0.672	0.914	0.361245
811	TTBK2_KAN550-7_2.tif:0011-0826	1.74	101.711	0	627	135.817	84.564	0.861	176.976	16884	1.572	0.636	0.915	1.17271
812	TTBK2_KAN550-7_2.tif:0012-0873	1.467	112.629	0	596	118.634	89.343	0.917	165.278	15768	1.249	0.801	0.936	1.09519
813	TTBK2_KAN550-7_2.tif:0013-0988	1.174	47.188	0	273	77.862	101.174	0.955	55.397	5285	1.12	0.893	0.941	0.367079
814	TTBK2_KAN550-7_3.tif:0001-0049	2.589	222.931	0	2034	110.56	5.009	0.903	577.173	55064	1.282	0.78	0.959	3.82457
815	TTBK2_KAN550-7_3.tif:0002-0052	1.048	138.94	0	756	126.689	5.323	0.736	145.635	13894	2	0.5	0.885	0.965032
816	TTBK2_KAN550-7_3.tif:0003-0101	1.289	23.065	0	121	87.9	10.375	0.885	29.737	2837	1.461	0.684	0.921	0.197049
817	TTBK2_KAN550-7_3.tif:0004-0107	1.08	76.01	0	455	63.704	11.043	0.69	82.062	7829	2.247	0.445	0.892	0.543777
818	TTBK2_KAN550-7_3.tif:0005-0109	1.321	154.151	0	1026	59.652	11.218	0.707	203.589	19423	2.012	0.497	0.89	1.34906
819	TTBK2_KAN550-7_3.tif:0006-0111	1.289	61.203	0	318	11.208	11.44	0.895	78.907	7528	1.245	0.803	0.932	0.52287
820	TTBK2_KAN550-7_3.tif:0007-0111	1.216	153.69	0	994	116.848	11.364	0.748	186.871	17828	1.643	0.609	0.866	1.23828
821	TTBK2_KAN550-7_3.tif:0008-0121	1.08	139.806	0	502	122.253	12.434	0.93	150.939	14400	1.146	0.873	0.972	1.00018
822	TTBK2_KAN550-7_3.tif:0009-0146	1.918	142.568	0	1200	35.855	14.999	0.906	273.472	26090	1.269	0.788	0.951	1.81213
823	TTBK2_KAN550-7_3.tif:0010-0229	1.488	129.965	0	660	67.813	23.512	0.693	193.443	18455	2.041	0.49	0.866	1.28182
824	TTBK2_KAN550-7_3.tif:0011-0252	1.153	15.164	0	82	56.471	25.821	0.922	17.484	1668	1.134	0.882	0.965	0.115854
825	TTBK2_KAN550-7_3.tif:0012-0313	2.39	179.601	0	1938	62.417	32.025	0.893	429.222	40949	1.38	0.725	0.954	2.84418
826	TTBK2_KAN550-7_3.tif:0013-0331	1.174	138.438	0	522	110.972	33.889	0.967	162.521	15505	1.209	0.827	0.97	1.07693
827	TTBK2_KAN550-7_3.tif:0014-0390	1.059	86.475	0	455	9.022	39.984	0.872	91.549	8734	1.082	0.924	0.914	0.606635
828	TTBK2_KAN550-7_3.tif:0015-0454	1.646	71.72	0	488	34.481	46.463	0.907	118.026	11260	1.281	0.781	0.924	0.782083
829	TTBK2_KAN550-7_3.tif:0016-0467	1.122	281.71	0	2580	118.246	47.868	0.936	315.955	30143	1.102	0.907	0.986	2.09363
830	TTBK2_KAN550-7_3.tif:0017-0496	1.394	86.669	0	374	67.337	50.811	0.694	120.824	11527	2.434	0.411	0.96	0.800628
831	TTBK2_KAN550-7_3.tif:0018-0518	1.237	23.008	0	99	107.268	53.144	0.733	28.458	2715	1.729	0.579	0.846	0.188575
832	TTBK2_KAN550-7_3.tif:0019-0538	1.509	74.833	0	711	92.052	55	0.666	112.953	10776	1.942	0.515	0.83	0.748466
833	TTBK2_KAN550-7_3.tif:0020-0623	1.897	160.652	0	1128	27.149	63.729	0.829	304.791	29078	1.618	0.618	0.926	2.01966
834	TTBK2_KAN550-7_3.tif:0021-0635	1.614	126.377	0	925	66.958	65.098	0.947	203.998	19462	1.139	0.878	0.936	1.35177
835	TTBK2_KAN550-7_3.tif:0022-0769	1.981	103.18	0	885	90.135	78.724	0.858	204.407	19501	1.14	0.877	0.909	1.35448
836	TTBK2_KAN550-7_3.tif:0023-0780	2.044	157.518	0	1297	128.733	79.907	0.865	321.961	30716	1.469	0.681	0.938	2.13343
837	TTBK2_KAN550-7_3.tif:0024-0818	2.086	133.698	0	1020	44.44	83.806	0.845	278.88	26606	1.376	0.727	0.936	1.84797
838	TTBK2_KAN550-7_3.tif:0025-0848	2.033	154.299	0	1367	96.279	86.839	0.88	313.764	29934	1.291	0.775	0.926	2.07912
839	TTBK2_KAN550-7_3.tif:0026-0914	1.792	99.181	0	774	105.24	93.569	0.941	177.772	16960	1.111	0.9	0.945	1.17799
840	TTBK2_KAN550-7_3.tif:0027-0965	2.023	93.71	0	811	86.219	98.85	0.857	189.575	18086	1.401	0.714	0.923	1.25619
841	TTBK2_KAN550-7_3.tif:0028-0999	1.824	82.701	0	593	40.764	102.35	0.903	150.834	14390	1.069	0.936	0.933	0.999483
842	TTBK2_KAN550-7_4.tif:0001-0141	1.205	26.278	0	161	12.138	14.419	0.924	31.676	3022	1.069	0.935	0.943	0.209898
843	TTBK2_KAN550-7_4.tif:0002-0201	1.572	68.287	0	352	71.893	20.609	0.899	107.366	10243	1.468	0.681	0.946	0.711446
844	TTBK2_KAN550-7_4.tif:0003-0273	1.048	71.86	0	329	92.311	27.942	0.932	75.323	7186	1.332	0.751	0.966	0.499116
845	TTBK2_KAN550-7_4.tif:0004-0418	1.551	147.318	0	1130	60.58	42.804	0.969	228.536	21803	1.146	0.872	0.958	1.51437
846	TTBK2_KAN550-7_4.tif:0005-0433	1.834	79.223	0	671	140.054	44.353	0.827	145.32	13864	1.712	0.584	0.951	0.962948
847	TTBK2_KAN550-7_4.tif:0006-0452	1.667	124.075	0	949	47.264	46.256	0.919	206.786	19728	1.143	0.875	0.927	1.37024
848	TTBK2_KAN550-7_4.tif:0007-0456	1.908	97.121	0	716	123.543	46.699	0.892	185.277	17676	1.403	0.713	0.941	1.22772
849	TTBK2_KAN550-7_4.tif:0008-0460	2.033	150.093	0	1173	91.797	47.076	0.88	305.211	29118	1.353	0.739	0.93	2.02244
850	TTBK2_KAN550-7_4.tif:0009-0652	1.887	131	0	1042	67.41	66.81	0.879	247.162	23580	1.172	0.853	0.963	1.63779
851	TTBK2_KAN550-7_4.tif:0010-0719	1.635	116.731	0	907	31.134	73.69	0.959	190.875	18210	1.053	0.95	0.945	1.26481
852	TTBK2_KAN550-7_4.tif:0011-0724	1.562	61.389	0	447	108.741	74.159	0.889	95.878	9147	1.275	0.784	0.983	0.635321
853	TTBK2_KAN550-7_4.tif:0012-0842	1.698	76.71	0	561	45.751	86.197	0.913	130.258	12427	1.379	0.725	0.945	0.863139
854	TTBK2_KAN550-7_4.tif:0013-0853	1.73	77.745	0	654	116.071	87.322	0.873	134.461	12828	1.276	0.784	0.959	0.890991
855	TTBK2_KAN550-7_4.tif:0014-0925	1.352	102.248	0	636	21.325	94.828	0.81	138.256	13190	1.582	0.632	0.938	0.916135
856	TTBK2_KAN550-7_5.tif:0001-0007	1.268	198.405	0	1173	128.945	0.693	0.866	251.638	24007	1.249	0.8	0.968	1.66745
857	TTBK2_KAN550-7_5.tif:0002-0047	1.457	39.835	0	285	32.309	4.886	0.911	58.038	5537	1.264	0.791	0.942	0.384582
858	TTBK2_KAN550-7_5.tif:0003-0104	2.107	139.303	0	1143	74.747	10.674	0.9	293.492	28000	1.27	0.788	0.953	1.94479
859	TTBK2_KAN550-7_5.tif:0004-0193	1.247	57.521	0	370	14.368	19.801	0.891	71.748	6845	1.325	0.755	0.933	0.475431
860	TTBK2_KAN550-7_5.tif:0005-0241	1.834	149.063	0	1293	121.595	24.723	0.939	273.43	26086	1.182	0.846	0.959	1.81185
861	TTBK2_KAN550-7_5.tif:0006-0276	1.929	170.016	0	1014	61.952	28.215	0.923	327.904	31283	1.191	0.84	0.944	2.17282
862	TTBK2_KAN550-7_5.tif:0007-0327	1.667	129.252	0	651	122.292	33.501	0.906	215.413	20551	1.213	0.824	0.952	1.42741
863	TTBK2_KAN550-7_5.tif:0008-0356	1.226	40.709	0	92	114.113	36.505	0.985	49.925	4763	1.243	0.804	0.936	0.330823
864	TTBK2_KAN550-7_5.tif:0009-0479	1.604	142.654	0	1056	63.795	49.102	0.917	228.777	21826	1.2	0.833	0.936	1.51596
865	TTBK2_KAN550-7_5.tif:0010-0511	1.614	90.955	0	389	117.416	52.285	0.909	146.819	14007	1.142	0.876	0.969	0.972881
866	TTBK2_KAN550-7_5.tif:0011-0550	1.646	110.401	0	782	29.295	56.34	0.941	181.682	17333	1.144	0.874	0.952	1.20389
867	TTBK2_KAN550-7_5.tif:0012-0701	1.73	90.764	0	742	56.754	71.818	0.886	156.976	14976	1.327	0.754	0.94	1.04018
868	TTBK2_KAN550-7_5.tif:0013-0701	1.405	60.709	0	335	8.164	71.826	0.878	85.27	8135	1.306	0.766	0.908	0.565031
869	TTBK2_KAN550-7_5.tif:0014-0815	2.054	132.99	0	1022	135.632	83.542	0.775	273.22	26066	1.591	0.629	0.897	1.81046
870	TTBK2_KAN550-7_5.tif:0015-0821	1.499	107.063	0	649	100.949	84.05	0.889	160.477	15310	1.35	0.74	0.941	1.06338
871	TTBK2_KAN550-7_5.tif:0016-0888	1.111	79.189	0	441	6.633	90.888	0.916	87.985	8394	1.23	0.813	0.951	0.58302
872	TTBK2_KAN550-7_5.tif:0017-0993	1.132	42.102	0	190	48.872	101.714	0.962	47.661	4547	1.05	0.952	0.952	0.31582
873	TTBK2_KAN550-7_6.tif:0001-0060	1.436	64.044	0	452	18.058	6.121	0.861	91.968	8774	1.35	0.741	0.948	0.609414
874	TTBK2_KAN550-7_6.tif:0002-0121	1.258	109.342	0	339	123.955	12.437	0.849	137.532	13121	1.409	0.71	0.923	0.911342
875	TTBK2_KAN550-7_6.tif:0003-0198	1.216	57.888	0	173	24.607	20.299	0.932	70.386	6715	1.13	0.885	0.951	0.466402
876	TTBK2_KAN550-7_6.tif:0004-0236	1.677	108.2	0	478	113.917	24.172	0.934	181.462	17312	1.236	0.809	0.961	1.20244
877	TTBK2_KAN550-7_6.tif:0005-0256	1.488	72.937	0	550	18.287	26.168	0.916	108.561	10357	1.094	0.914	0.966	0.719364
878	TTBK2_KAN550-7_6.tif:0006-0306	1.195	69.482	0	295	66.205	31.288	0.807	83.027	7921	1.47	0.68	0.905	0.550167
879	TTBK2_KAN550-7_6.tif:0007-0460	1.981	91.587	0	833	55.181	47.119	0.858	181.441	17310	1.496	0.668	0.931	1.2023
880	TTBK2_KAN550-7_6.tif:0008-0512	1.509	112.396	0	616	52.515	52.405	0.8	169.649	16185	1.436	0.696	0.897	1.12416
881	TTBK2_KAN550-7_6.tif:0009-0657	1.415	185.407	0	1051	99.122	67.259	0.971	262.361	25030	1.084	0.922	0.947	1.7385
882	TTBK2_KAN550-7_6.tif:0010-0742	1.719	117.11	0	749	86.554	75.954	0.902	201.315	19206	1.171	0.854	0.932	1.33399
883	TTBK2_KAN550-7_6.tif:0011-0798	1.771	86.243	0	586	91.93	81.764	0.877	152.773	14575	1.359	0.736	0.936	1.01233
884	TTBK2_KAN550-7_6.tif:0012-0822	1.279	55.344	0	399	23.11	84.176	0.94	70.774	6752	1.167	0.857	0.942	0.468972
885	TTBK2_KAN550-7_6.tif:0013-0854	1.394	84.88	0	483	56.19	87.512	0.891	118.33	11289	1.24	0.806	0.974	0.784097
886	TTBK2_KAN550-7_6.tif:0014-0982	1.363	131.662	0	880	133.432	100.582	0.895	179.408	17116	1.095	0.913	0.959	1.18882
										16331				1.1343
887	TTBK2_KAN550-8_1.tif:0001-0063	1.268	47.025	0	216	23.281	6.48	0.88	59.642	5690	1.385	0.722	0.934	0.395209
888	TTBK2_KAN550-8_1.tif:0002-0089	1.321	94.278	0	547	129.109	9.086	0.943	124.514	11879	1.04	0.962	0.944	0.825077
889	TTBK2_KAN550-8_1.tif:0003-0194	1.813	66.353	0	476	129.958	19.926	0.856	120.321	11479	1.347	0.742	0.923	0.797294
890	TTBK2_KAN550-8_1.tif:0004-0250	1.415	102.644	0	499	105.883	25.659	0.919	145.247	13857	1.115	0.897	0.941	0.962462
891	TTBK2_KAN550-8_1.tif:0005-0529	1.96	50.963	0	442	55.84	54.257	0.795	99.892	9530	1.36	0.735	0.893	0.661923
892	TTBK2_KAN550-8_1.tif:0006-0561	1.268	35.868	0	220	78.06	57.415	0.944	45.491	4340	1.092	0.916	0.964	0.301442
893	TTBK2_KAN550-8_1.tif:0007-0569	1.394	50.752	0	273	88.267	58.285	0.93	70.753	6750	1.3	0.769	0.94	0.468833
894	TTBK2_KAN550-8_1.tif:0008-0578	1.373	27.634	0	172	117.446	59.17	0.927	37.944	3620	1.073	0.932	0.963	0.251433
895	TTBK2_KAN550-8_1.tif:0009-0687	1.331	77.378	0	409	52.971	70.372	0.841	103.005	9827	1.318	0.759	0.914	0.682552
896	TTBK2_KAN550-8_1.tif:0010-0722	1.834	75.76	0	641	85.735	73.933	0.838	138.968	13258	1.39	0.719	0.907	0.920858
897	TTBK2_KAN550-8_1.tif:0011-0935	1.488	43.613	0	282	100.206	95.72	0.809	64.914	6193	1.257	0.796	0.89	0.430146
898	TTBK2_KAN550-8_1.tif:0012-0981	1.321	26.54	0	206	132.688	100.436	0.943	35.051	3344	1.066	0.938	0.947	0.232263
899	TTBK2_KAN550-8_2.tif:0001-0108	2.453	81.376	0	1010	98.276	10.974	0.822	199.596	19042	1.581	0.632	0.936	1.3226
900	TTBK2_KAN550-8_2.tif:0002-0169	1.069	12.873	0	76	114.419	17.326	0.881	13.763	1313	1.263	0.792	0.923	0.0911967
901	TTBK2_KAN550-8_2.tif:0003-0304	1.132	47.981	0	237	57.772	31.196	0.962	54.317	5182	1.021	0.979	0.96	0.359925
902	TTBK2_KAN550-8_2.tif:0004-0348	1.163	62.64	0	446	83.287	35.659	0.831	72.88	6953	1.543	0.648	0.906	0.482933
903	TTBK2_KAN550-8_2.tif:0005-0485	1.918	83.235	0	720	124.6	49.799	0.838	159.66	15232	1.467	0.681	0.941	1.05797
904	TTBK2_KAN550-8_2.tif:0006-0530	1.929	38.658	0	233	38.161	54.239	0.743	74.557	7113	1.688	0.592	0.878	0.494046
905	TTBK2_KAN550-8_2.tif:0007-0550	2.149	53.888	0	403	111.373	56.274	0.735	115.793	11047	1.501	0.666	0.872	0.767289
906	TTBK2_KAN550-8_2.tif:0008-0566	2.222	72.005	0	805	126.725	57.915	0.705	160.006	15265	1.716	0.583	0.836	1.06026
907	TTBK2_KAN550-8_2.tif:0009-0607	1.813	89.983	0	862	72.574	62.141	0.829	163.171	15567	1.219	0.82	0.894	1.08123
908	TTBK2_KAN550-8_3.tif:0001-0168	1.426	84.426	0	472	87.232	17.259	0.951	120.353	11482	1.274	0.785	0.951	0.797502
909	TTBK2_KAN550-8_3.tif:0002-0339	1.153	21.3	0	135	129.976	34.737	0.894	24.559	2343	1.098	0.911	0.957	0.162737
910	TTBK2_KAN550-8_3.tif:0003-0450	1.625	31.806	0	166	83.55	46.156	0.953	51.676	4930	1.095	0.913	0.948	0.342422
911	TTBK2_KAN550-8_3.tif:0004-0570	1.824	55.322	0	406	126.412	58.314	0.861	100.898	9626	1.454	0.688	0.938	0.668591
912	TTBK2_KAN550-8_3.tif:0005-0723	1.75	91.401	0	872	114.397	74.081	0.896	159.995	15264	1.213	0.825	0.936	1.06019
913	TTBK2_KAN550-8_4.tif:0001-0101	1.771	44.225	0	432	111.358	10.388	0.92	78.341	7474	1.249	0.801	0.921	0.51912
914	TTBK2_KAN550-8_4.tif:0002-0104	1.677	93.206	0	938	128.367	10.58	0.88	156.316	14913	1.175	0.851	0.93	1.03581
915	TTBK2_KAN550-8_4.tif:0003-0180	2.201	62.762	0	763	88.985	18.436	0.793	138.151	13180	1.553	0.644	0.894	0.91544
916	TTBK2_KAN550-8_4.tif:0004-0200	2.065	70.929	0	735	50.862	20.436	0.837	146.463	13973	1.371	0.729	0.929	0.970519
917	TTBK2_KAN550-8_4.tif:0005-0243	2.117	78.946	0	790	68.162	24.904	0.869	167.154	15947	1.251	0.799	0.931	1.10763
918	TTBK2_KAN550-8_4.tif:0006-0314	1.111	16.566	0	119	124.829	32.226	0.975	18.406	1756	1.05	0.953	0.946	0.121966
919	TTBK2_KAN550-8_4.tif:0007-0456	1.405	37.366	0	196	79.078	46.726	0.948	52.483	5007	1.193	0.838	0.971	0.34777
920	TTBK2_KAN550-8_4.tif:0008-0498	1.132	55.537	0	336	34.729	51.004	0.993	62.87	5998	1.189	0.841	0.964	0.416602
921	TTBK2_KAN550-8_4.tif:0009-0564	2.327	58.824	0	601	115.052	57.705	0.73	136.883	13059	2.173	0.46	0.912	0.907036
922	TTBK2_KAN550-8_4.tif:0010-0710	1.384	11.439	0	57	103.152	72.738	0.913	15.828	1510	1.28	0.781	0.923	0.10488
923	TTBK2_KAN550-8_4.tif:0011-0857	1.604	34.961	0	382	43.928	87.744	0.775	56.067	5349	1.579	0.633	0.877	0.371524
924	TTBK2_KAN550-8_5.tif:0001-0086	1.457	40.331	0	240	77.229	8.793	0.921	58.761	5606	1.291	0.775	0.962	0.389375
925	TTBK2_KAN550-8_5.tif:0002-0127	1.876	102.508	0	862	70.77	13.128	0.878	192.332	18349	1.029	0.972	0.923	1.27446
926	TTBK2_KAN550-8_5.tif:0003-0345	2.337	48.413	0	500	123.306	35.252	0.756	113.162	10796	1.762	0.567	0.899	0.749855
927	TTBK2_KAN550-8_5.tif:0004-0467	1.457	40.655	0	252	53.444	47.793	0.961	59.233	5651	1.184	0.845	0.936	0.3925
928	TTBK2_KAN550-8_5.tif:0005-0596	1.31	49.848	0	227	29.801	61.019	0.936	65.312	6231	1.017	0.983	0.943	0.432785
929	TTBK2_KAN550-8_5.tif:0006-0674	2.013	88.979	0	810	105.161	69.052	0.798	179.072	17084	1.723	0.581	0.923	1.1866
930	TTBK2_KAN550-8_5.tif:0007-0799	1.405	38.455	0	357	137.341	81.886	0.902	54.013	5153	1.127	0.887	0.908	0.357911
931	TTBK2_KAN550-8_5.tif:0008-0814	1.771	50.787	0	426	47.32	83.308	0.837	89.966	8583	1.414	0.707	0.911	0.596147
932	TTBK2_KAN550-8_5.tif:0009-0830	2.358	56.311	0	571	80.894	84.899	0.749	132.805	12670	1.843	0.543	0.896	0.880017
933	TTBK2_KAN550-8_6.tif:0001-0041	1.855	81.667	0	599	71.426	4.24	0.811	151.515	14455	1.892	0.529	0.937	1.004
934	TTBK2_KAN550-8_6.tif:0002-0067	1.268	27.174	0	136	137.772	6.909	0.88	34.464	3288	1.425	0.702	0.927	0.228374
935	TTBK2_KAN550-8_6.tif:0003-0219	2.002	94.246	0	771	98.483	22.438	0.867	188.684	18001	1.393	0.718	0.932	1.25029
936	TTBK2_KAN550-8_6.tif:0004-0231	1.855	76.904	0	617	140.811	23.658	0.856	142.679	13612	1.235	0.81	0.929	0.945445
937	TTBK2_KAN550-8_6.tif:0005-0371	1.457	59.662	0	311	68.658	38.008	0.704	86.926	8293	1.908	0.524	0.85	0.576005
938	TTBK2_KAN550-8_6.tif:0006-0418	1.593	64.151	0	300	133.254	42.753	0.911	102.209	9751	1.188	0.842	0.935	0.677273
939	TTBK2_KAN550-8_6.tif:0007-0602	1.363	49.077	0	203	101.984	61.65	0.973	66.874	6380	1.049	0.953	0.959	0.443134
940	TTBK2_KAN550-8_6.tif:0008-0708	1.331	34.142	0	211	28.528	72.485	0.951	45.449	4336	1.06	0.943	0.951	0.301164
										11556.1				0.802649
941	TTBK2_KAN550-9_1.tif:0001-0037	1.405	5.575	0	25	100.136	3.816	0.888	7.83	747	1.496	0.668	0.957	0.0518842
942	TTBK2_KAN550-9_1.tif:0002-0129	1.321	9.016	0	35	140.205	13.23	0.917	11.907	1136	1.072	0.933	0.951	0.0789029
943	TTBK2_KAN550-9_1.tif:0003-0153	1.771	14.751	0	180	45.022	15.722	0.898	26.131	2493	1.315	0.76	0.923	0.173156
944	TTBK2_KAN550-9_1.tif:0004-0240	1.352	8.147	0	62	43.977	24.552	0.888	11.016	1051	1.063	0.94	0.949	0.072999
945	TTBK2_KAN550-9_1.tif:0005-0509	1.52	16.393	0	104	43.781	52.067	0.901	24.915	2377	1.284	0.779	0.948	0.165099
946	TTBK2_KAN550-9_1.tif:0006-0521	1.195	11.614	0	66	107.729	53.392	1	13.878	1324	1.184	0.845	0.958	0.0919607
947	TTBK2_KAN550-9_1.tif:0007-0587	1.352	12.543	0	105	65.543	60.135	0.966	16.96	1618	1.181	0.847	0.963	0.112381
948	TTBK2_KAN550-9_1.tif:0008-0614	1.667	13.195	0	80	120.479	62.925	0.866	21.991	2098	1.247	0.802	0.909	0.14572
949	TTBK2_KAN550-9_1.tif:0009-0651	1.426	20.699	0	100	70.165	66.679	0.926	29.506	2815	1.278	0.783	0.954	0.195521
950	TTBK2_KAN550-9_1.tif:0010-0902	1.488	9.07	0	68	113.554	92.294	0.86	13.501	1288	1.284	0.779	0.934	0.0894603
951	TTBK2_KAN550-9_1.tif:0011-0948	1.541	10.612	0	68	141.302	97.069	0.904	16.352	1560	1.329	0.752	0.93	0.108353
952	TTBK2_KAN550-9_1.tif:0012-0975	1.268	6.421	0	85	52.502	99.897	0.944	8.144	777	1.123	0.89	0.964	0.0539679
953	TTBK2_KAN550-9_1.tif:0013-1024	1.289	13.081	0	85	114.157	104.883	0.921	16.865	1609	1.097	0.912	0.939	0.111756
954	TTBK2_KAN550-9_2.tif:0001-0074	1.258	10.142	0	80	92.129	7.621	0.952	12.756	1217	1.207	0.829	0.934	0.0845289
955	TTBK2_KAN550-9_2.tif:0002-0137	1.059	7.723	0	39	25.683	13.971	0.9	8.176	780	1.242	0.805	0.927	0.0541763
956	TTBK2_KAN550-9_2.tif:0003-0158	1.499	22.091	0	167	130.775	16.253	0.889	33.112	3159	1.096	0.912	0.938	0.219414
957	TTBK2_KAN550-9_2.tif:0004-0188	2.149	9.376	0	101	52.921	19.27	0.856	20.146	1922	1.315	0.761	0.919	0.133496
958	TTBK2_KAN550-9_2.tif:0005-0273	2.107	12.234	0	72	77.755	28.042	0.814	25.775	2459	1.63	0.613	0.901	0.170794
959	TTBK2_KAN550-9_2.tif:0006-0376	1.436	18.956	0	110	109.753	38.57	0.932	27.221	2597	1.185	0.844	0.948	0.180379
960	TTBK2_KAN550-9_2.tif:0007-0493	1.53	14.349	0	95	141.219	50.47	0.942	21.959	2095	1.087	0.92	0.97	0.145512
961	TTBK2_KAN550-9_2.tif:0008-0505	1.446	11.638	0	61	45.074	51.725	0.929	16.834	1606	1.283	0.779	0.945	0.111548
962	TTBK2_KAN550-9_2.tif:0009-0528	1.488	10.577	0	91	83.573	54.111	0.93	15.744	1502	1.271	0.787	0.944	0.104324
963	TTBK2_KAN550-9_2.tif:0010-0594	1.268	9.992	0	70	57.907	60.866	0.906	12.673	1209	1.228	0.814	0.924	0.0839732
964	TTBK2_KAN550-9_2.tif:0011-0640	1.153	6.136	0	29	11.497	65.555	0.938	7.075	675	1.145	0.873	0.936	0.0468833
965	TTBK2_KAN550-9_2.tif:0012-0686	1.384	9.621	0	71	89.871	70.253	0.888	13.312	1270	1.495	0.669	0.913	0.0882101
966	TTBK2_KAN550-9_2.tif:0013-0724	1.237	28.237	0	293	118.969	74.191	0.976	34.926	3332	1.125	0.889	0.955	0.23143
967	TTBK2_KAN550-9_2.tif:0014-0765	1.373	7.275	0	33	85.051	78.355	0.892	9.989	953	1.195	0.836	0.926	0.0661923
968	TTBK2_KAN550-9_2.tif:0015-0877	1.08	12.505	0	80	40.274	89.816	0.93	13.501	1288	1.122	0.891	0.972	0.0894603
969	TTBK2_KAN550-9_3.tif:0001-0096	1.216	20.069	0	76	110.488	9.882	0.96	24.402	2328	1.289	0.776	0.963	0.161695
970	TTBK2_KAN550-9_3.tif:0002-0171	1.52	9.11	0	78	93.157	17.512	0.878	13.847	1321	1.441	0.694	0.957	0.0917524
971	TTBK2_KAN550-9_3.tif:0003-0196	1.101	6.733	0	35	46.325	20.163	0.843	7.411	707	1.671	0.598	0.917	0.0491059
972	TTBK2_KAN550-9_3.tif:0004-0227	1.551	7.858	0	43	55.701	23.302	0.91	12.19	1163	1.317	0.759	0.937	0.0807782
973	TTBK2_KAN550-9_3.tif:0005-0378	1.289	19.106	0	104	96.47	38.706	0.932	24.632	2350	1.101	0.909	0.969	0.163223
974	TTBK2_KAN550-9_3.tif:0006-0393	1.426	27.338	0	123	133.601	40.328	0.901	38.972	3718	1.129	0.886	0.938	0.25824
975	TTBK2_KAN550-9_3.tif:0007-0624	1.698	13.988	0	90	88.378	63.893	0.936	23.752	2266	1.158	0.864	0.942	0.157389
976	TTBK2_KAN550-9_3.tif:0008-0652	1.205	6.165	0	31	76.287	66.892	0.734	7.432	709	1.504	0.665	0.827	0.0492448
977	TTBK2_KAN550-9_3.tif:0009-0681	1.279	6.615	0	65	34.926	69.708	0.877	8.459	807	1.284	0.779	0.914	0.0560516
978	TTBK2_KAN550-9_3.tif:0010-0735	1.163	6.541	0	38	58.522	75.26	0.918	7.61	726	1.214	0.824	0.929	0.0504256
979	TTBK2_KAN550-9_3.tif:0011-0785	1.52	15.048	0	131	114.883	80.379	0.925	22.871	2182	1.185	0.844	0.945	0.151555
980	TTBK2_KAN550-9_4.tif:0001-0038	1.583	15.642	0	71	67.958	3.906	0.891	24.758	2362	1.102	0.907	0.953	0.164057
981	TTBK2_KAN550-9_4.tif:0002-0083	1.436	14.861	0	63	86.469	8.551	0.922	21.341	2036	1.3	0.769	0.926	0.141414
982	TTBK2_KAN550-9_4.tif:0003-0152	1.205	10.965	0	49	101.204	15.592	0.897	13.218	1261	1.316	0.76	0.947	0.087585
983	TTBK2_KAN550-9_4.tif:0004-0233	1.709	17.626	0	71	36.991	23.866	0.897	30.114	2873	1.277	0.783	0.924	0.199549
984	TTBK2_KAN550-9_4.tif:0005-0286	1.457	17.165	0	88	101.628	29.345	0.961	25.01	2386	1.105	0.905	0.942	0.165724
985	TTBK2_KAN550-9_4.tif:0006-0379	1.467	19.15	0	96	86.641	38.896	0.932	28.102	2681	1.318	0.759	0.933	0.186214
986	TTBK2_KAN550-9_4.tif:0007-0430	1.562	15.047	0	110	46.345	44.004	0.883	23.5	2242	1.21	0.826	0.9	0.155722
987	TTBK2_KAN550-9_4.tif:0008-0475	1.405	12.843	0	80	53.271	48.654	0.912	18.039	1721	1.314	0.761	0.947	0.119535
988	TTBK2_KAN550-9_4.tif:0009-0604	1.143	12.651	0	60	14.23	61.895	0.902	14.454	1379	1.109	0.902	0.92	0.0957809
989	TTBK2_KAN550-9_4.tif:0010-0624	1.698	10.395	0	76	68.713	63.955	0.841	17.651	1684	1.551	0.645	0.926	0.116965
990	TTBK2_KAN550-9_4.tif:0011-0685	1.226	12.214	0	50	79.285	70.171	0.94	14.979	1429	1.103	0.906	0.955	0.0992537
991	TTBK2_KAN550-9_4.tif:0012-0905	1.216	11.862	0	101	77.68	92.646	0.96	14.423	1376	1.203	0.831	0.955	0.0955725
992	TTBK2_KAN550-9_4.tif:0013-0945	1.467	11.371	0	59	137.699	96.743	0.917	16.687	1592	1.205	0.83	0.927	0.110575
993	TTBK2_KAN550-9_4.tif:0014-1032	1.122	10.888	0	71	94.534	105.729	0.953	12.211	1165	1.037	0.964	0.947	0.0809171
994	TTBK2_KAN550-9_5.tif:0001-0069	1.3	24.306	0	188	53.511	7.037	0.928	31.592	3014	1.043	0.959	0.943	0.209343
995	TTBK2_KAN550-9_5.tif:0002-0134	1.688	10.161	0	65	119.906	13.697	0.908	17.148	1636	1.132	0.883	0.936	0.113631
996	TTBK2_KAN550-9_5.tif:0003-0196	1.677	29.669	0	353	49.577	20.091	0.889	49.757	4747	1.252	0.799	0.95	0.329711
997	TTBK2_KAN550-9_5.tif:0004-0324	1.625	26.923	0	321	110.188	33.184	0.953	43.741	4173	1.085	0.921	0.951	0.289843
998	TTBK2_KAN550-9_5.tif:0005-0350	1.457	6.317	0	32	85.494	35.895	0.901	9.203	878	1.298	0.77	0.921	0.060983
999	TTBK2_KAN550-9_5.tif:0006-0499	1.646	15.611	0	81	116.403	51.2	0.894	25.691	2451	1.29	0.775	0.952	0.170239
1000	TTBK2_KAN550-9_5.tif:0007-0552	1.289	8.333	0	57	35.113	56.501	0.948	10.744	1025	1.074	0.931	0.943	0.0711932
1001	TTBK2_KAN550-9_5.tif:0008-0568	1.122	10.748	0	60	54.526	58.177	0.924	12.054	1150	1.068	0.937	0.947	0.0798753
1002	TTBK2_KAN550-9_5.tif:0009-0805	1.551	11.588	0	57	100.084	82.451	0.877	17.976	1715	1.174	0.852	0.905	0.119118
1003	TTBK2_KAN550-9_5.tif:0010-0916	1.247	9.975	0	50	113.185	93.756	0.832	12.442	1187	1.219	0.821	0.878	0.0824452
1004	TTBK2_KAN550-9_5.tif:0011-0997	1.279	8.967	0	52	126.253	102.033	0.94	11.467	1094	1.041	0.96	0.935	0.0759857
1005	TTBK2_KAN550-9_6.tif:0001-0042	1.625	22.587	0	192	48.724	4.388	0.874	36.697	3501	1.289	0.776	0.914	0.243168
1006	TTBK2_KAN550-9_6.tif:0002-0151	1.247	12.176	0	79	103.437	15.432	0.866	15.188	1449	1.16	0.862	0.926	0.100643
1007	TTBK2_KAN550-9_6.tif:0003-0328	1.31	15.584	0	102	106.479	33.646	0.92	20.419	1948	1.303	0.768	0.984	0.135302
1008	TTBK2_KAN550-9_6.tif:0004-0343	1.059	13.475	0	58	25.978	35.129	0.959	14.266	1361	1.192	0.839	0.935	0.0945306
1009	TTBK2_KAN550-9_6.tif:0005-0376	1.541	9.667	0	49	98.18	38.549	0.904	14.895	1421	1.314	0.761	0.93	0.098698
1010	TTBK2_KAN550-9_6.tif:0006-0411	1.467	24.829	0	206	130.016	42.111	0.917	36.435	3476	1.243	0.804	0.943	0.241432
1011	TTBK2_KAN550-9_6.tif:0007-0512	1.101	10.305	0	78	32.146	52.429	0.907	11.341	1082	1.221	0.819	0.942	0.0751522
1012	TTBK2_KAN550-9_6.tif:0008-0635	1.541	15.476	0	129	36.545	65.021	0.913	23.846	2275	1.262	0.793	0.964	0.158014
1013	TTBK2_KAN550-9_6.tif:0009-0668	1.405	14.381	0	91	137.583	68.378	0.874	20.199	1927	1.056	0.947	0.964	0.133843
1014	TTBK2_KAN550-9_6.tif:0010-0677	1.226	16.812	0	88	110.921	69.311	0.968	20.618	1967	1.092	0.916	0.951	0.136621
1015	TTBK2_KAN550-9_6.tif:0011-0680	1.205	5.809	0	32	72.889	69.651	0.912	7.002	668	1.051	0.952	0.913	0.0463971
1016	TTBK2_KAN550-9_6.tif:0012-0870	1.226	12.769	0	61	114.734	89.09	0.912	15.66	1494	1.183	0.846	0.947	0.103768
1017	TTBK2_KAN550-9_6.tif:0013-1031	1.08	7.893	0	34	95.098	105.678	0.827	8.522	813	1.339	0.747	0.892	0.0564683
										1790.56				0.124366
14	TTBK2_KAN550-10_1.tif:0001-0168	1.992	95.816	0	953	136.354	17.163	0.8	190.822	18205	1.688	0.592	0.896	1.26446
15	TTBK2_KAN550-10_1.tif:0002-0198	1.719	88.89	0	696	108.013	20.34	0.859	152.805	14578	1.092	0.916	0.924	1.01254
16	TTBK2_KAN550-10_1.tif:0003-0209	1.646	79.197	0	429	76.277	21.364	0.907	130.331	12434	1.356	0.737	0.926	0.863625
17	TTBK2_KAN550-10_1.tif:0004-0375	1.31	42.616	0	215	55.613	38.433	0.936	55.837	5327	1.2	0.833	0.947	0.369996
18	TTBK2_KAN550-10_1.tif:0005-0402	2.023	63.29	0	679	130.396	41.132	0.813	128.036	12215	1.607	0.622	0.906	0.848414
19	TTBK2_KAN550-10_1.tif:0006-0428	1.415	47.881	0	365	11.095	43.817	0.732	67.755	6464	2.065	0.484	0.903	0.448968
20	TTBK2_KAN550-10_1.tif:0007-0464	1.709	95.485	0	499	47.785	47.533	0.875	163.14	15564	1.203	0.831	0.929	1.08102
21	TTBK2_KAN550-10_1.tif:0008-0583	2.327	58.541	0	568	110.023	59.736	0.745	136.222	12996	1.909	0.524	0.895	0.90266
22	TTBK2_KAN550-10_1.tif:0009-0590	1.31	50.896	0	276	16.064	60.426	0.91	66.686	6362	1.398	0.715	0.951	0.441884
23	TTBK2_KAN550-10_1.tif:0010-0649	2.159	99.393	0	936	78.08	66.497	0.831	214.616	20475	1.468	0.681	0.922	1.42213
24	TTBK2_KAN550-10_1.tif:0011-0747	2.023	78.565	0	834	112.478	76.47	0.82	158.936	15163	1.721	0.581	0.935	1.05317
25	TTBK2_KAN550-10_1.tif:0012-0780	1.415	74.956	0	549	68.572	79.875	0.894	106.066	10119	1.128	0.886	0.944	0.702833
26	TTBK2_KAN550-10_1.tif:0013-0856	1.174	73.732	0	374	27.659	87.683	0.955	86.559	8258	1.152	0.868	0.929	0.573574
27	TTBK2_KAN550-10_1.tif:0014-0901	1.31	35.128	0	182	124.426	92.28	0.91	46.026	4391	1.291	0.775	0.947	0.304985
28	TTBK2_KAN550-10_2.tif:0001-0179	1.195	14.07	0	54	40.275	18.386	0.972	16.813	1604	1.119	0.894	0.95	0.111409
29	TTBK2_KAN550-10_2.tif:0002-0210	2.17	99.976	0	891	105.888	21.551	0.846	216.922	20695	1.517	0.659	0.93	1.43741
30	TTBK2_KAN550-10_2.tif:0003-0273	1.09	65.606	0	192	93.341	27.948	0.898	71.518	6823	1.278	0.782	0.933	0.473903
31	TTBK2_KAN550-10_2.tif:0004-0293	1.53	71.808	0	520	47.402	30.048	0.897	109.892	10484	1.334	0.75	0.921	0.728185
32	TTBK2_KAN550-10_2.tif:0005-0415	2.002	81.497	0	733	85.875	42.503	0.84	163.161	15566	1.412	0.708	0.912	1.08116
33	TTBK2_KAN550-10_2.tif:0006-0418	1.824	113.874	0	897	119.686	42.842	0.903	207.688	19814	1.353	0.739	0.948	1.37622
34	TTBK2_KAN550-10_2.tif:0007-0588	1.583	81.285	0	380	27.314	60.217	0.953	128.654	12274	1.262	0.792	0.941	0.852512
35	TTBK2_KAN550-10_2.tif:0008-0671	1.562	116.43	0	822	53.302	68.736	0.926	181.839	17348	1.003	0.997	0.952	1.20494
36	TTBK2_KAN550-10_2.tif:0009-0779	1.688	72.944	0	522	113.412	79.75	0.877	123.099	11744	1.38	0.725	0.925	0.8157
37	TTBK2_KAN550-10_2.tif:0010-0780	1.625	91.884	0	422	132.913	79.894	0.953	149.283	14242	1.076	0.93	0.942	0.989203
38	TTBK2_KAN550-10_2.tif:0011-0886	1.331	68.315	0	422	33.719	90.738	0.951	90.941	8676	1.216	0.822	0.958	0.602607
39	TTBK2_KAN550-10_2.tif:0012-0972	1.059	37.089	0	241	14.333	99.574	0.836	39.265	3746	1.463	0.684	0.886	0.260185
40	TTBK2_KAN550-10_2.tif:0013-0989	1.457	70.597	0	547	80.99	101.276	0.921	102.858	9813	1.143	0.875	0.955	0.681579
41	TTBK2_KAN550-10_3.tif:0001-0095	1.719	111.311	0	784	74.81	9.776	0.925	191.346	18255	1.307	0.765	0.945	1.26793
42	TTBK2_KAN550-10_3.tif:0002-0131	1.541	109.966	0	757	136.647	13.453	0.938	169.439	16165	1.087	0.92	0.948	1.12277
43	TTBK2_KAN550-10_3.tif:0003-0177	2.086	126.075	0	1281	116.211	18.166	0.903	262.979	25089	1.335	0.749	0.941	1.7426
44	TTBK2_KAN550-10_3.tif:0004-0203	1.635	84.494	0	639	35.8	20.812	0.935	138.161	13181	1.254	0.798	0.951	0.915509
45	TTBK2_KAN550-10_3.tif:0005-0288	2.065	120.076	0	1222	83.352	29.459	0.848	247.948	23655	1.476	0.677	0.912	1.643
46	TTBK2_KAN550-10_3.tif:0006-0326	1.761	105.905	0	931	126.634	33.385	0.851	186.493	17792	1.507	0.664	0.926	1.23577
47	TTBK2_KAN550-10_3.tif:0007-0418	1.667	119.031	0	563	54.94	42.769	0.906	198.38	18926	1.276	0.784	0.952	1.31454
48	TTBK2_KAN550-10_3.tif:0008-0572	1.635	61.788	0	471	93.409	58.61	0.858	101.035	9639	1.213	0.825	0.91	0.669494
49	TTBK2_KAN550-10_3.tif:0009-0688	1.342	103.148	0	673	14.354	70.444	0.906	138.392	13203	1.118	0.894	0.945	0.917038
50	TTBK2_KAN550-10_3.tif:0010-0839	1.625	68.129	0	536	136.197	85.959	0.832	110.688	10560	1.263	0.792	0.899	0.733463
51	TTBK2_KAN550-10_3.tif:0011-0847	1.122	88.533	0	448	22.802	86.742	0.896	99.295	9473	1.135	0.881	0.943	0.657964
52	TTBK2_KAN550-10_4.tif:0001-0091	1.488	60.331	0	324	97.778	9.394	0.892	89.798	8567	1.108	0.903	0.953	0.595036
53	TTBK2_KAN550-10_4.tif:0002-0120	1.635	71.885	0	646	119.357	12.344	0.858	117.544	11214	1.249	0.8	0.912	0.778888
54	TTBK2_KAN550-10_4.tif:0003-0154	1.572	89.02	0	795	17.272	15.735	0.854	139.964	13353	1.395	0.717	0.929	0.927456
55	TTBK2_KAN550-10_4.tif:0004-0194	1.95	75.457	0	832	136.986	19.911	0.912	147.113	14035	1.092	0.916	0.932	0.974826
56	TTBK2_KAN550-10_4.tif:0005-0207	2.673	81.749	0	955	67.663	21.053	0.664	218.505	20846	1.496	0.668	0.836	1.4479
57	TTBK2_KAN550-10_4.tif:0006-0355	1.698	71.321	0	568	45.573	36.357	0.891	121.107	11554	1.416	0.706	0.939	0.802503
58	TTBK2_KAN550-10_4.tif:0007-0441	2.054	92.281	0	720	90.111	45.167	0.898	189.585	18087	1.211	0.826	0.947	1.25626
59	TTBK2_KAN550-10_4.tif:0008-0526	1.992	93.353	0	757	102.704	53.853	0.89	185.917	17737	1.362	0.734	0.952	1.23195
60	TTBK2_KAN550-10_4.tif:0009-0580	2.316	73.801	0	477	117.592	59.388	0.831	170.959	16310	1.522	0.657	0.94	1.13284
61	TTBK2_KAN550-10_4.tif:0010-0705	1.625	54.8	0	368	64.743	72.246	0.905	89.033	8494	1.314	0.761	0.942	0.589966
62	TTBK2_KAN550-10_4.tif:0011-0792	1.75	95.323	0	628	108.424	81.093	0.808	166.861	15919	1.39	0.72	0.9	1.10568
63	TTBK2_KAN550-10_4.tif:0012-0836	1.331	60.622	0	407	23.687	85.634	0.924	80.7	7699	1.197	0.835	0.951	0.534748
64	TTBK2_KAN550-10_4.tif:0013-0972	1.268	79.744	0	343	58.055	99.548	0.944	101.139	9649	1.126	0.888	0.968	0.670188
65	TTBK2_KAN550-10_4.tif:0014-0977	1.289	47.439	0	281	28.657	100.067	0.91	61.162	5835	1.353	0.739	0.918	0.40528
66	TTBK2_KAN550-10_5.tif:0001-0091	1.226	62.35	0	292	24.768	9.363	0.901	76.465	7295	1.231	0.813	0.921	0.506687
67	TTBK2_KAN550-10_5.tif:0002-0160	1.73	186.485	0	1681	140.229	16.464	0.865	322.527	30770	1.219	0.82	0.924	2.13718
68	TTBK2_KAN550-10_5.tif:0003-0232	1.803	68.756	0	647	108.082	23.828	0.851	123.958	11826	1.355	0.738	0.945	0.821396
69	TTBK2_KAN550-10_5.tif:0004-0351	1.635	79.897	0	715	43.262	35.948	0.911	130.646	12464	1.292	0.774	0.943	0.865709
70	TTBK2_KAN550-10_5.tif:0005-0355	1.614	94.76	0	627	99.65	36.337	0.877	152.962	14593	1.231	0.812	0.939	1.01358
71	TTBK2_KAN550-10_5.tif:0006-0563	1.059	103.02	0	588	2.316	57.616	0.811	109.064	10405	1.415	0.707	0.878	0.722698
72	TTBK2_KAN550-10_5.tif:0007-0634	1.824	127.437	0	1039	82.416	65.002	0.882	232.425	22174	1.096	0.912	0.923	1.54013
73	TTBK2_KAN550-10_5.tif:0008-0855	1.478	82.177	0	643	136.184	87.533	0.924	121.453	11587	1.208	0.828	0.934	0.804795
74	TTBK2_KAN550-10_5.tif:0009-0887	1.457	66.317	0	453	50.724	90.866	0.935	96.622	9218	1.132	0.883	0.927	0.640252
75	TTBK2_KAN550-10_5.tif:0010-0973	1.488	80.282	0	668	87.857	99.662	0.966	119.493	11400	1.148	0.871	0.963	0.791807
76	TTBK2_KAN550-10_6.tif:0001-0045	2.054	60.27	0	529	35.258	4.663	0.881	123.822	11813	1.385	0.722	0.918	0.820493
77	TTBK2_KAN550-10_6.tif:0002-0077	1.834	51.743	0	334	73.414	7.94	0.858	94.913	9055	1.213	0.824	0.904	0.628931
78	TTBK2_KAN550-10_6.tif:0003-0182	1.834	89.429	0	826	96.611	18.666	0.895	164.041	15650	1.116	0.896	0.97	1.087
79	TTBK2_KAN550-10_6.tif:0004-0195	1.279	120.967	0	672	128.95	19.951	0.924	154.691	14758	1.117	0.895	0.964	1.02504
80	TTBK2_KAN550-10_6.tif:0005-0226	2.264	112.046	0	1054	65.522	23.205	0.806	253.682	24202	1.117	0.895	0.878	1.68099
81	TTBK2_KAN550-10_6.tif:0006-0338	1.53	75.041	0	549	28.874	34.592	0.956	114.839	10956	1.184	0.844	0.951	0.760968
82	TTBK2_KAN550-10_6.tif:0007-0369	1.478	58.355	0	253	115.021	37.83	0.854	86.245	8228	1.59	0.629	0.934	0.57149
83	TTBK2_KAN550-10_6.tif:0008-0443	1.394	108.632	0	814	87.304	45.361	0.905	151.442	14448	1.297	0.771	0.947	1.00351
84	TTBK2_KAN550-10_6.tif:0009-0566	1.541	56.769	0	475	60.822	57.976	0.881	87.471	8345	1.357	0.737	0.922	0.579617
85	TTBK2_KAN550-10_6.tif:0010-0608	1.111	65.377	0	293	23.898	62.247	0.877	72.639	6930	1.37	0.73	0.898	0.481335
86	TTBK2_KAN550-10_6.tif:0011-0705	1.342	62.219	0	338	15.392	72.19	0.775	83.478	7964	1.692	0.591	0.895	0.553154
87	TTBK2_KAN550-10_6.tif:0012-0729	2.243	112.734	0	1256	87.192	74.635	0.718	252.875	24125	1.776	0.563	0.865	1.67564
88	TTBK2_KAN550-10_6.tif:0013-0727	1.069	59.363	0	203	130.158	74.471	0.968	63.468	6055	1.054	0.949	0.936	0.420561
89	TTBK2_KAN550-10_6.tif:0014-0792	1.929	101.821	0	903	105.495	81.043	0.914	196.378	18735	1.329	0.753	0.92	1.30127
90	TTBK2_KAN550-10_6.tif:0015-0878	1.887	95.489	0	639	118.204	89.908	0.843	180.162	17188	1.6	0.625	0.925	1.19382
91	TTBK2_KAN550-10_6.tif:0016-0901	1.488	58.218	0	449	42.206	92.26	0.86	86.654	8267	1.331	0.751	0.937	0.574199
										13065				0.907451
92	TTBK2_KAN550-11_1.tif:0001-0097	1.572	60.613	0	353	46.657	9.9	0.908	95.301	9092	1.211	0.825	0.962	0.631501
93	TTBK2_KAN550-11_1.tif:0002-0148	2.044	78.179	0	769	95.604	15.173	0.764	159.796	15245	1.494	0.669	0.882	1.05887
94	TTBK2_KAN550-11_1.tif:0003-0201	1.614	78.318	0	465	110.788	20.645	0.856	126.422	12061	1.273	0.785	0.933	0.837718
95	TTBK2_KAN550-11_1.tif:0004-0416	1.52	136.448	0	940	122.718	42.566	0.878	207.384	19785	1.203	0.831	0.945	1.3742
96	TTBK2_KAN550-11_1.tif:0005-0442	1.394	71.534	0	457	41.659	45.237	0.858	99.724	9514	1.314	0.761	0.947	0.660812
97	TTBK2_KAN550-11_1.tif:0006-0458	1.237	54.39	0	247	74.093	46.93	0.909	67.273	6418	1.301	0.769	0.922	0.445773
98	TTBK2_KAN550-11_1.tif:0007-0652	1.719	69.939	0	594	104.837	66.795	0.911	120.227	11470	1.099	0.91	0.956	0.796669
99	TTBK2_KAN550-11_1.tif:0008-0755	1.436	77.715	0	363	53.424	77.292	0.932	111.6	10647	1.261	0.793	0.958	0.739506
100	TTBK2_KAN550-11_1.tif:0009-0948	1.132	77.213	0	391	132.635	97.074	0.867	87.408	8339	1.533	0.652	0.931	0.5792
101	TTBK2_KAN550-11_1.tif:0010-0961	1.342	46.789	0	313	79.014	98.466	0.974	62.776	5989	1.073	0.932	0.941	0.415977
102	TTBK2_KAN550-11_2.tif:0001-0094	1.268	57.975	0	246	128.064	9.65	0.891	73.53	7015	1.127	0.887	0.968	0.487239
103	TTBK2_KAN550-11_2.tif:0002-0141	1.782	78.112	0	512	27.355	14.484	0.853	139.189	13279	1.412	0.708	0.902	0.922316
104	TTBK2_KAN550-11_2.tif:0003-0346	1.153	69.209	0	301	123.339	35.453	0.833	79.798	7613	1.336	0.748	0.924	0.528774
105	TTBK2_KAN550-11_2.tif:0004-0351	1.457	115.626	0	709	88.697	35.935	0.921	168.464	16072	1.287	0.777	0.959	1.11631
106	TTBK2_KAN550-11_2.tif:0005-0375	1.08	66.078	0	311	40.029	38.351	0.89	71.34	6806	1.166	0.857	0.945	0.472723
107	TTBK2_KAN550-11_2.tif:0006-0433	1.059	65.604	0	293	64.003	44.376	0.9	69.453	6626	1.204	0.831	0.935	0.46022
108	TTBK2_KAN550-11_2.tif:0007-0493	2.033	120.49	0	1229	97.942	50.545	0.8	245.013	23375	1.656	0.604	0.909	1.62355
109	TTBK2_KAN550-11_2.tif:0008-0646	1.394	63.774	0	514	33.345	66.215	0.732	88.907	8482	1.907	0.524	0.853	0.589132
110	TTBK2_KAN550-11_2.tif:0009-0707	1.467	56.636	0	454	80.935	72.38	0.917	83.111	7929	1.147	0.872	0.933	0.550723
111	TTBK2_KAN550-11_2.tif:0010-0954	1.635	57.538	0	447	95.04	97.753	0.879	94.085	8976	1.231	0.812	0.912	0.623444
112	TTBK2_KAN550-11_2.tif:0011-1002	1.08	60.563	0	261	44.015	102.57	0.89	65.386	6238	1.375	0.727	0.936	0.433271
113	TTBK2_KAN550-11_2.tif:0012-1028	1.53	96.349	0	693	132.737	105.363	0.811	147.448	14067	1.547	0.646	0.918	0.977048
114	TTBK2_KAN550-11_3.tif:0001-0040	1.604	105.791	0	794	33.894	4.073	0.842	169.659	16186	1.435	0.697	0.905	1.12423
115	TTBK2_KAN550-11_3.tif:0002-0121	2.054	81.434	0	631	99.418	12.499	0.87	167.301	15961	1.116	0.896	0.927	1.1086
116	TTBK2_KAN550-11_3.tif:0003-0134	1.656	105.614	0	1074	55.191	13.713	0.891	174.911	16687	1.264	0.791	0.921	1.15902
117	TTBK2_KAN550-11_3.tif:0004-0141	1.436	47.496	0	310	16.954	14.503	0.718	68.205	6507	1.501	0.666	0.835	0.451955
118	TTBK2_KAN550-11_3.tif:0005-0141	1.342	97.969	0	662	126.932	14.489	0.947	131.443	12540	1.098	0.911	0.928	0.870988
119	TTBK2_KAN550-11_3.tif:0006-0330	1.887	56.122	0	357	118.766	33.874	0.835	105.888	10102	1.452	0.689	0.914	0.701652
120	TTBK2_KAN550-11_3.tif:0007-0488	1.719	43.104	0	301	79.366	50.009	0.872	74.096	7069	1.444	0.693	0.924	0.49099
121	TTBK2_KAN550-11_3.tif:0008-0502	1.719	95.335	0	708	50.722	51.381	0.872	163.884	15635	1.351	0.74	0.911	1.08596
122	TTBK2_KAN550-11_3.tif:0009-0603	1.415	155.4	0	1060	131.255	61.71	0.929	219.899	20979	1.02	0.98	0.975	1.45713
123	TTBK2_KAN550-11_3.tif:0010-0715	1.782	134.065	0	974	84.803	73.2	0.903	238.892	22791	1.35	0.741	0.924	1.58299
124	TTBK2_KAN550-11_3.tif:0011-0917	1.625	41.168	0	333	140.063	93.841	0.767	66.885	6381	1.648	0.607	0.899	0.443204
125	TTBK2_KAN550-11_3.tif:0012-0979	1.677	89.806	0	565	117.92	100.287	0.859	150.614	14369	1.361	0.735	0.928	0.998024
126	TTBK2_KAN550-11_3.tif:0013-1015	1.593	80.342	0	638	80.289	103.96	0.879	128.004	12212	1.413	0.708	0.899	0.848206
127	TTBK2_KAN550-11_4.tif:0001-0069	1.74	67.554	0	460	121.865	7.133	0.87	117.544	11214	1.419	0.705	0.943	0.778888
128	TTBK2_KAN550-11_4.tif:0002-0070	1.992	67.379	0	535	93.844	7.171	0.851	134.189	12802	1.398	0.715	0.943	0.889185
129	TTBK2_KAN550-11_4.tif:0003-0100	1.457	106.396	0	753	79.943	10.303	0.946	155.016	14789	1.159	0.863	0.959	1.0272
130	TTBK2_KAN550-11_4.tif:0004-0186	1.792	102.24	0	726	64.218	19.092	0.846	183.254	17483	1.254	0.798	0.929	1.21431
131	TTBK2_KAN550-11_4.tif:0005-0214	1.195	21.439	0	77	111.948	21.912	0.889	25.618	2444	1.2	0.833	0.942	0.169752
132	TTBK2_KAN550-11_4.tif:0006-0265	1.53	76.295	0	493	108.018	27.202	0.894	116.757	11139	1.289	0.776	0.977	0.773679
133	TTBK2_KAN550-11_4.tif:0007-0308	1.572	71.56	0	358	140.602	31.546	0.854	112.512	10734	1.294	0.773	0.909	0.745549
134	TTBK2_KAN550-11_4.tif:0008-0448	1.604	116.928	0	908	53.167	45.838	0.907	187.52	17890	1.301	0.769	0.919	1.24258
135	TTBK2_KAN550-11_4.tif:0009-0524	1.562	120.685	0	771	78.285	53.686	0.94	188.485	17982	1.208	0.828	0.934	1.24897
136	TTBK2_KAN550-11_4.tif:0010-0573	1.73	66	0	387	107.135	58.702	0.756	114.147	10890	1.556	0.643	0.875	0.756384
137	TTBK2_KAN550-11_4.tif:0011-0631	1.363	29.715	0	157	50.985	64.591	0.946	40.491	3863	1.038	0.963	0.959	0.268311
138	TTBK2_KAN550-11_4.tif:0012-0688	1.887	89	0	688	127.794	70.44	0.817	167.919	16020	1.619	0.618	0.909	1.1127
139	TTBK2_KAN550-11_4.tif:0013-0788	1.572	87.06	0	631	75.364	80.697	0.946	136.883	13059	1.278	0.783	0.94	0.907036
140	TTBK2_KAN550-11_4.tif:0014-0812	1.698	76.586	0	469	19.612	83.164	0.849	130.048	12407	1.532	0.653	0.936	0.86175
141	TTBK2_KAN550-11_4.tif:0015-0900	1.143	20.174	0	184	40.15	92.189	0.959	23.05	2199	1.097	0.912	0.936	0.152735
142	TTBK2_KAN550-11_4.tif:0016-0939	1.551	78.007	0	622	119.125	96.188	0.814	121.013	11545	1.4	0.714	0.905	0.801878
143	TTBK2_KAN550-11_4.tif:0017-0972	1.289	44.585	0	298	92.424	99.545	0.976	57.483	5484	1.233	0.811	0.95	0.380901
144	TTBK2_KAN550-11_5.tif:0001-0039	1.415	83.563	0	528	129.503	4.014	0.971	118.246	11281	1.11	0.901	0.951	0.783542
145	TTBK2_KAN550-11_5.tif:0002-0131	1.918	66.76	0	431	50.438	13.394	0.838	128.057	12217	1.299	0.77	0.922	0.848553
146	TTBK2_KAN550-11_5.tif:0003-0138	1.719	102.195	0	805	98.318	14.128	0.82	175.676	16760	1.597	0.626	0.945	1.1641
147	TTBK2_KAN550-11_5.tif:0004-0142	1.342	122.875	0	742	38.682	14.536	0.931	164.859	15728	1.156	0.865	0.959	1.09242
148	TTBK2_KAN550-11_5.tif:0005-0237	1.625	86.452	0	515	83.621	24.214	0.929	140.457	13400	1.131	0.884	0.939	0.930721
149	TTBK2_KAN550-11_5.tif:0006-0305	1.059	46.832	0	325	25.902	31.236	0.861	49.579	4730	1.336	0.748	0.89	0.32853
150	TTBK2_KAN550-11_5.tif:0007-0308	1.866	98.624	0	791	61.506	31.504	0.853	184.009	17555	1.207	0.829	0.913	1.21931
151	TTBK2_KAN550-11_5.tif:0008-0326	1.321	61.992	0	412	46.999	33.382	0.844	81.874	7811	1.288	0.776	0.94	0.542527
152	TTBK2_KAN550-11_5.tif:0009-0380	1.488	66.711	0	418	107.256	38.942	0.882	99.295	9473	1.468	0.681	0.944	0.657964
153	TTBK2_KAN550-11_5.tif:0010-0389	1.467	23.864	0	209	136.73	39.863	0.968	35.02	3341	1.02	0.98	0.943	0.232055
154	TTBK2_KAN550-11_5.tif:0011-0823	1.593	101.414	0	740	137.252	84.291	0.897	161.578	15415	1.184	0.845	0.959	1.07068
155	TTBK2_KAN550-11_5.tif:0012-0885	1.289	65.561	0	366	48.692	90.672	0.921	84.526	8064	1.252	0.799	0.935	0.560099
156	TTBK2_KAN550-11_6.tif:0001-0021	1.646	162.548	0	1186	105.177	2.156	0.894	267.497	25520	1.217	0.822	0.94	1.77254
157	TTBK2_KAN550-11_6.tif:0002-0110	1.876	77.279	0	617	71.625	11.219	0.907	144.996	13833	1.284	0.779	0.95	0.960795
158	TTBK2_KAN550-11_6.tif:0003-0263	1.069	64.686	0	364	18.236	26.919	0.855	69.159	6598	1.306	0.766	0.927	0.458276
159	TTBK2_KAN550-11_6.tif:0004-0288	1.635	121.231	0	1111	123.846	29.452	0.959	198.233	18912	1.259	0.794	0.954	1.31357
160	TTBK2_KAN550-11_6.tif:0005-0289	1.488	121.106	0	623	133.286	29.644	0.941	180.257	17197	1.111	0.9	0.959	1.19445
161	TTBK2_KAN550-11_6.tif:0006-0319	1.352	53.791	0	399	42.881	32.626	0.854	72.734	6939	1.35	0.741	0.918	0.48196
162	TTBK2_KAN550-11_6.tif:0007-0386	1.52	129.331	0	830	74.471	39.566	0.95	196.566	18753	1.079	0.926	0.939	1.30252
163	TTBK2_KAN550-11_6.tif:0008-0429	1.677	147.4	0	1165	133.079	43.953	0.934	247.204	23584	1.115	0.896	0.958	1.63807
164	TTBK2_KAN550-11_6.tif:0009-0566	1.331	95.15	0	517	55.545	57.96	0.935	126.663	12084	1.107	0.904	0.984	0.839315
165	TTBK2_KAN550-11_6.tif:0010-0629	1.541	112.388	0	817	110.289	64.471	0.9	173.171	16521	1.116	0.896	0.974	1.1475
166	TTBK2_KAN550-11_6.tif:0011-0847	1.52	72.11	0	639	64.337	86.787	0.901	109.598	10456	1.052	0.95	0.932	0.72624
167	TTBK2_KAN550-11_6.tif:0012-0911	1.478	59.404	0	438	109.53	93.31	0.89	87.796	8376	1.203	0.832	0.898	0.58177
168	TTBK2_KAN550-11_6.tif:0013-1005	1.572	53.107	0	412	129.131	102.909	0.922	83.498	7966	1.333	0.75	0.935	0.553293
										12037.9				0.83611
169	TTBK2_KAN550-12_1.tif:0001-0082	1.834	103.217	0	848	136.696	8.468	0.908	189.334	18063	1.356	0.737	0.943	1.2546
170	TTBK2_KAN550-12_1.tif:0002-0204	1.331	65.37	0	387	11.774	20.876	0.841	87.02	8302	1.648	0.607	0.937	0.57663
171	TTBK2_KAN550-12_1.tif:0003-0217	1.876	101.011	0	639	62.021	22.244	0.866	189.522	18081	1.396	0.716	0.935	1.25585
172	TTBK2_KAN550-12_1.tif:0004-0231	1.467	82.693	0	505	93.77	23.66	0.893	121.348	11577	1.317	0.76	0.927	0.804101
173	TTBK2_KAN550-12_1.tif:0005-0237	1.646	84.49	0	565	133.536	24.285	0.834	139.042	13265	1.502	0.666	0.897	0.921344
174	TTBK2_KAN550-12_1.tif:0006-0313	1.247	72.597	0	257	85.331	32.041	0.956	90.553	8639	1.315	0.761	0.964	0.600037
175	TTBK2_KAN550-12_1.tif:0007-0513	2.285	124.018	0	1266	116.56	52.579	0.847	283.388	27036	1.502	0.666	0.908	1.87783
176	TTBK2_KAN550-12_1.tif:0008-0590	1.604	91.353	0	581	65.143	60.427	0.894	146.505	13977	1.298	0.77	0.936	0.970797
177	TTBK2_KAN550-12_1.tif:0009-0618	1.541	108.578	0	877	44.65	63.316	0.881	167.301	15961	1.434	0.697	0.922	1.1086
178	TTBK2_KAN550-12_1.tif:0010-0687	1.761	101.369	0	601	95.929	70.339	0.947	178.506	17030	1.247	0.802	0.955	1.18285
179	TTBK2_KAN550-12_1.tif:0011-0826	1.237	64.941	0	464	87.528	84.63	0.936	80.322	7663	1.209	0.827	0.925	0.532247
180	TTBK2_KAN550-12_1.tif:0012-0880	1.352	129.163	0	653	123.327	90.114	0.939	174.649	16662	1.097	0.911	0.959	1.15729
181	TTBK2_KAN550-12_1.tif:0013-0889	1.184	66.283	0	305	134.261	90.992	0.908	78.509	7490	1.177	0.85	0.934	0.520231
182	TTBK2_KAN550-12_1.tif:0014-0919	1.698	59.296	0	333	67.046	94.136	0.794	100.689	9606	1.459	0.685	0.869	0.667202
183	TTBK2_KAN550-12_2.tif:0001-0046	1.698	131.364	0	754	138.901	4.754	0.9	223.064	21281	1.472	0.679	0.97	1.47811
184	TTBK2_KAN550-12_2.tif:0002-0141	1.698	134.142	0	723	135.066	14.39	0.87	227.781	21731	1.333	0.75	0.934	1.50936
185	TTBK2_KAN550-12_2.tif:0003-0159	1.069	54.039	0	349	117.265	16.354	0.71	57.776	5512	2.454	0.408	0.953	0.382846
186	TTBK2_KAN550-12_2.tif:0004-0203	1.572	109.233	0	644	84.897	20.764	0.922	171.745	16385	1.127	0.888	0.926	1.13805
187	TTBK2_KAN550-12_2.tif:0005-0207	2.149	86.878	0	782	115.416	21.217	0.856	186.682	17810	1.464	0.683	0.913	1.23702
188	TTBK2_KAN550-12_2.tif:0006-0277	1.405	97.679	0	556	47.104	28.393	0.842	137.197	13089	1.497	0.668	0.954	0.909119
189	TTBK2_KAN550-12_2.tif:0007-0417	1.53	141.829	0	877	75.161	42.692	0.862	217.048	20707	1.328	0.753	0.939	1.43824
190	TTBK2_KAN550-12_2.tif:0008-0573	1.321	108.492	0	571	40.91	58.693	0.917	143.287	13670	1.258	0.795	0.951	0.949474
191	TTBK2_KAN550-12_2.tif:0009-0648	1.562	71.262	0	396	18.519	66.396	0.849	111.296	10618	1.559	0.641	0.931	0.737492
192	TTBK2_KAN550-12_2.tif:0010-0650	1.405	46.59	0	346	101.072	66.557	0.953	65.438	6243	1.177	0.85	0.937	0.433619
193	TTBK2_KAN550-12_2.tif:0011-0681	1.415	83.948	0	471	126.464	69.674	0.908	118.791	11333	1.421	0.704	0.931	0.787153
194	TTBK2_KAN550-12_2.tif:0012-0872	1.562	70.456	0	261	134.741	89.239	0.849	110.039	10498	1.332	0.751	0.923	0.729157
195	TTBK2_KAN550-12_2.tif:0013-0913	1.226	81.761	0	448	2.377	93.535	0.928	100.269	9566	1.332	0.751	0.936	0.664423
196	TTBK2_KAN550-12_2.tif:0014-1022	1.415	91.889	0	422	129.247	104.685	0.908	130.027	12405	1.453	0.688	0.931	0.861611
197	TTBK2_KAN550-12_3.tif:0001-0038	1.373	84.542	0	654	141.804	3.968	0.845	116.087	11075	1.359	0.736	0.946	0.769234
198	TTBK2_KAN550-12_3.tif:0002-0175	2.013	126.948	0	1182	121.222	17.992	0.86	255.485	24374	1.415	0.707	0.941	1.69294
199	TTBK2_KAN550-12_3.tif:0003-0178	2.013	92.828	0	449	127.166	18.275	0.834	186.818	17823	1.638	0.611	0.939	1.23793
200	TTBK2_KAN550-12_3.tif:0004-0216	2.086	95.98	0	870	77.399	22.094	0.856	200.204	19100	1.456	0.687	0.934	1.32662
201	TTBK2_KAN550-12_3.tif:0005-0397	2.023	122.513	0	1167	118.536	40.693	0.849	247.844	23645	1.528	0.654	0.928	1.6423
202	TTBK2_KAN550-12_3.tif:0006-0405	1.792	87.064	0	552	30.27	41.527	0.684	156.054	14888	2.022	0.494	0.866	1.03407
203	TTBK2_KAN550-12_3.tif:0007-0444	1.677	69.956	0	373	75.786	45.494	0.819	117.323	11193	1.49	0.671	0.917	0.777429
204	TTBK2_KAN550-12_3.tif:0008-0601	1.95	52.629	0	427	30.172	61.529	0.78	102.607	9789	1.767	0.566	0.951	0.679912
205	TTBK2_KAN550-12_3.tif:0009-0620	2.589	154.777	0	1739	98.838	63.5	0.738	400.721	38230	1.845	0.542	0.881	2.65533
206	TTBK2_KAN550-12_3.tif:0010-0628	1.331	109.37	0	527	47.486	64.278	0.924	145.593	13890	1.028	0.973	0.948	0.964754
207	TTBK2_KAN550-12_3.tif:0011-0694	2.086	40.894	0	368	121.851	71.032	0.78	85.301	8138	1.619	0.618	0.902	0.565239
208	TTBK2_KAN550-12_3.tif:0012-0728	1.813	90.526	0	676	53.995	74.535	0.856	164.156	15661	1.479	0.676	0.928	1.08776
209	TTBK2_KAN550-12_3.tif:0013-0796	1.887	68.639	0	506	83.331	81.517	0.664	129.503	12355	1.924	0.52	0.831	0.858138
210	TTBK2_KAN550-12_3.tif:0014-0840	1.834	66.16	0	341	35.328	86.011	0.82	121.359	11578	1.771	0.565	0.923	0.80417
211	TTBK2_KAN550-12_3.tif:0015-0881	1.688	64.981	0	503	96.844	90.219	0.816	109.661	10462	1.508	0.663	0.907	0.726657
212	TTBK2_KAN550-12_3.tif:0016-0942	1.394	95.835	0	548	70.836	96.496	0.835	133.602	12746	1.618	0.618	0.943	0.885296
213	TTBK2_KAN550-12_4.tif:0001-0090	1.635	122.878	0	744	108.263	9.21	0.911	200.927	19169	1.306	0.766	0.945	1.33142
214	TTBK2_KAN550-12_4.tif:0002-0117	1.342	60.797	0	479	9.445	11.979	0.775	81.57	7782	1.527	0.655	0.883	0.540512
215	TTBK2_KAN550-12_4.tif:0003-0278	2.107	88.498	0	770	61.85	28.511	0.829	186.451	17788	1.567	0.638	0.922	1.2355
216	TTBK2_KAN550-12_4.tif:0004-0563	1.436	63.606	0	524	12.563	57.667	0.83	91.339	8714	1.473	0.679	0.926	0.605246
217	TTBK2_KAN550-12_4.tif:0005-0708	1.667	58.044	0	457	73.25	72.479	0.833	96.737	9229	1.622	0.616	0.938	0.641016
218	TTBK2_KAN550-12_4.tif:0006-0773	1.688	62.627	0	478	22.003	79.147	0.852	105.689	10083	1.676	0.596	0.985	0.700332
219	TTBK2_KAN550-12_4.tif:0007-0833	2.212	136.251	0	1027	133.944	85.342	0.908	301.343	28749	1.218	0.821	0.932	1.99681
220	TTBK2_KAN550-12_4.tif:0008-0869	1.174	92.705	0	491	104.015	89.011	0.927	108.833	10383	1.085	0.921	0.933	0.721169
221	TTBK2_KAN550-12_5.tif:0001-0157	1.855	71	0	516	103.794	16.108	0.918	131.726	12567	1.327	0.754	0.941	0.872863
222	TTBK2_KAN550-12_5.tif:0002-0228	1.363	117.938	0	735	133.039	23.395	0.946	160.708	15332	1.197	0.836	0.963	1.06491
223	TTBK2_KAN550-12_5.tif:0003-0270	2.096	52.82	0	613	118.821	27.75	0.777	110.73	10564	1.195	0.837	0.857	0.733741
224	TTBK2_KAN550-12_5.tif:0004-0299	1.09	82.529	0	508	22.142	30.61	0.871	89.966	8583	1.308	0.765	0.929	0.596147
225	TTBK2_KAN550-12_5.tif:0005-0449	1.572	113.42	0	608	73.592	45.952	0.946	178.328	17013	1.252	0.799	0.946	1.18167
226	TTBK2_KAN550-12_5.tif:0006-0462	1.226	51.009	0	212	32.46	47.266	0.901	62.556	5968	1.256	0.796	0.932	0.414518
227	TTBK2_KAN550-12_5.tif:0007-0488	1.709	124.982	0	946	114.994	50.03	0.875	213.536	20372	1.236	0.809	0.937	1.41497
228	TTBK2_KAN550-12_5.tif:0008-0720	1.614	117.188	0	830	63.37	73.829	0.762	189.166	18047	1.622	0.617	0.885	1.25349
229	TTBK2_KAN550-12_5.tif:0009-0878	1.122	23.776	0	211	41.828	89.893	0.859	26.666	2544	1.577	0.634	0.951	0.176698
230	TTBK2_KAN550-12_5.tif:0010-1028	1.446	56.442	0	455	137.528	105.262	0.818	81.643	7789	1.452	0.688	0.873	0.540999
231	TTBK2_KAN550-12_6.tif:0001-0039	1.572	48.707	0	236	92.903	4.044	0.899	76.58	7306	1.29	0.775	0.94	0.507451
232	TTBK2_KAN550-12_6.tif:0002-0110	1.813	86.821	0	396	47.103	11.288	0.898	157.438	15020	1.203	0.831	0.935	1.04324
233	TTBK2_KAN550-12_6.tif:0003-0193	1.405	75.59	0	495	12.655	19.85	0.855	106.171	10129	1.428	0.7	0.915	0.703527
234	TTBK2_KAN550-12_6.tif:0004-0214	1.792	95.789	0	750	36.503	21.895	0.931	171.693	16380	1.268	0.789	0.937	1.1377
235	TTBK2_KAN550-12_6.tif:0005-0236	1.551	83.757	0	624	126.131	24.235	0.822	129.933	12396	1.8	0.556	0.946	0.860986
236	TTBK2_KAN550-12_6.tif:0006-0309	1.541	103.177	0	699	137.558	31.651	0.89	158.978	15167	1.305	0.766	0.951	1.05345
237	TTBK2_KAN550-12_6.tif:0007-0482	1.52	32.428	0	222	28.655	49.396	0.915	49.286	4702	1.32	0.757	0.935	0.326586
238	TTBK2_KAN550-12_6.tif:0008-0511	1.457	67.216	0	434	50.24	52.358	0.864	97.932	9343	1.315	0.76	0.917	0.648934
239	TTBK2_KAN550-12_6.tif:0009-0517	1.845	88.614	0	643	130.726	52.947	0.892	163.475	15596	1.138	0.879	0.929	1.08325
240	TTBK2_KAN550-12_6.tif:0010-0540	1.698	99.457	0	733	66.284	55.372	0.913	168.884	16112	1.235	0.809	0.934	1.11909
241	TTBK2_KAN550-12_6.tif:0011-0549	1.583	83.53	0	401	102.644	56.256	0.963	132.208	12613	1.112	0.899	0.965	0.876058
242	TTBK2_KAN550-12_6.tif:0012-0794	1.53	71.877	0	496	34.739	81.29	0.884	109.997	10494	1.17	0.855	0.945	0.728879
243	TTBK2_KAN550-12_6.tif:0013-0860	1.446	99.384	0	493	101.055	88.088	0.914	143.759	13715	1.149	0.87	0.945	0.952599
244	TTBK2_KAN550-12_6.tif:0014-0975	1.184	66.327	0	382	125.605	99.82	0.881	78.562	7495	1.269	0.788	0.934	0.520578
245	TTBK2_KAN550-12_6.tif:0015-1009	1.394	81.692	0	305	71.369	103.359	0.93	113.885	10865	1.332	0.751	0.943	0.754648
										13599.4				0.944572
246	TTBK2_KAN550-13_1.tif:0001-0007	1.09	28.077	0	179	26.431	0.768	0.939	30.607	2920	1.116	0.896	0.977	0.202814
247	TTBK2_KAN550-13_1.tif:0002-0133	2.054	85.612	0	1031	87.331	13.612	0.833	175.886	16780	1.327	0.754	0.912	1.16548
248	TTBK2_KAN550-13_1.tif:0003-0177	2.086	73.176	0	495	60.513	18.166	0.911	152.637	14562	1.03	0.971	0.961	1.01143
249	TTBK2_KAN550-13_1.tif:0004-0202	2.128	71.69	0	538	105.382	20.682	0.77	152.542	14553	1.901	0.526	0.933	1.0108
250	TTBK2_KAN550-13_1.tif:0005-0208	1.855	82.989	0	610	26.601	21.332	0.811	153.968	14689	1.848	0.541	0.934	1.02025
251	TTBK2_KAN550-13_1.tif:0006-0299	1.771	59.722	0	427	134.115	30.612	0.856	105.793	10093	1.242	0.805	0.929	0.701027
252	TTBK2_KAN550-13_1.tif:0007-0436	1.604	49.399	0	420	27.929	44.652	0.723	79.222	7558	2.072	0.483	0.884	0.524954
253	TTBK2_KAN550-13_1.tif:0008-0471	1.446	33.13	0	220	93.325	48.264	0.954	47.923	4572	1.058	0.945	0.936	0.317556
254	TTBK2_KAN550-13_1.tif:0009-0598	1.604	64.013	0	380	61.652	61.234	0.85	102.659	9794	1.325	0.755	0.924	0.680259
255	TTBK2_KAN550-13_1.tif:0010-0786	1.593	58.105	0	349	57.948	80.542	0.77	92.576	8832	1.479	0.676	0.879	0.613442
256	TTBK2_KAN550-13_1.tif:0011-0871	1.635	76.417	0	600	79.049	89.176	0.858	124.954	11921	1.296	0.771	0.92	0.827994
257	TTBK2_KAN550-13_1.tif:0012-0922	1.771	57.509	0	272	118.5	94.339	0.877	101.873	9719	1.264	0.791	0.931	0.67505
258	TTBK2_KAN550-13_2.tif:0001-0107	1.572	25.62	0	196	76.746	10.934	0.922	40.282	3843	1.347	0.742	0.935	0.266922
259	TTBK2_KAN550-13_2.tif:0002-0122	1.981	110.656	0	887	46.992	12.535	0.786	219.218	20914	1.296	0.772	0.9	1.45262
260	TTBK2_KAN550-13_2.tif:0003-0153	1.971	54.176	0	495	112.426	15.689	0.792	106.758	10185	1.602	0.624	0.881	0.707417
261	TTBK2_KAN550-13_2.tif:0004-0201	1.226	105.906	0	726	32.877	20.625	0.886	129.881	12391	1.414	0.707	0.955	0.860639
262	TTBK2_KAN550-13_2.tif:0005-0303	2.044	102.482	0	526	102.267	31.042	0.828	209.469	19984	1.563	0.64	0.926	1.38802
263	TTBK2_KAN550-13_2.tif:0006-0402	1.656	82.209	0	654	87.858	41.225	0.923	136.149	12989	1.155	0.866	0.946	0.902174
264	TTBK2_KAN550-13_2.tif:0007-0492	1.824	94.724	0	504	126.149	50.394	0.739	172.762	16482	1.621	0.617	0.866	1.14479
265	TTBK2_KAN550-13_2.tif:0008-0535	1.572	80.12	0	680	46.893	54.768	0.908	125.971	12018	1.257	0.796	0.962	0.834731
266	TTBK2_KAN550-13_2.tif:0009-0549	1.195	10.474	0	37	90.977	56.245	0.96	12.515	1194	1.196	0.836	0.927	0.0829314
267	TTBK2_KAN550-13_2.tif:0010-0666	2.013	71.417	0	472	117.644	68.189	0.809	143.727	13712	1.55	0.645	0.91	0.952391
268	TTBK2_KAN550-13_2.tif:0011-0722	1.656	50.127	0	339	34.044	73.918	0.686	83.016	7920	1.65	0.606	0.823	0.550097
269	TTBK2_KAN550-13_2.tif:0012-0849	1.792	72.795	0	720	94.798	86.952	0.808	130.478	12448	1.625	0.615	0.917	0.864598
270	TTBK2_KAN550-13_2.tif:0013-0894	1.163	40.577	0	308	67.772	91.532	0.959	47.21	4504	1.222	0.818	0.965	0.312833
271	TTBK2_KAN550-13_2.tif:0014-0918	1.95	57.602	0	431	112.846	94.033	0.726	112.303	10714	2.261	0.442	0.961	0.74416
272	TTBK2_KAN550-13_2.tif:0015-0924	1.73	58.333	0	415	34.063	94.654	0.756	100.888	9625	1.979	0.505	0.897	0.668521
273	TTBK2_KAN550-13_3.tif:0001-0097	1.122	16.636	0	77	137.113	9.911	0.924	18.658	1780	1.226	0.816	0.955	0.123633
274	TTBK2_KAN550-13_3.tif:0002-0148	1.981	59.37	0	502	141.135	15.17	0.741	117.617	11221	1.775	0.563	0.873	0.779374
275	TTBK2_KAN550-13_3.tif:0003-0201	2.736	97.69	0	1295	125.626	20.595	0.741	267.256	25497	1.998	0.501	0.886	1.77094
276	TTBK2_KAN550-13_3.tif:0004-0210	2.233	116.441	0	776	71.851	21.499	0.878	259.971	24802	1.446	0.691	0.945	1.72267
277	TTBK2_KAN550-13_3.tif:0005-0219	1.656	90.57	0	704	19.827	22.436	0.913	149.995	14310	1.184	0.845	0.924	0.993926
278	TTBK2_KAN550-13_3.tif:0006-0286	2.275	86.797	0	891	108.274	29.318	0.816	197.426	18835	1.712	0.584	0.925	1.30822
279	TTBK2_KAN550-13_3.tif:0007-0461	1.992	60.758	0	481	55.02	47.25	0.843	121.003	11544	1.536	0.651	0.922	0.801809
280	TTBK2_KAN550-13_3.tif:0008-0481	1.405	39.836	0	196	128.853	49.248	0.937	55.952	5338	1.066	0.938	0.944	0.37076
281	TTBK2_KAN550-13_3.tif:0009-0595	2.306	64.7	0	528	84.647	60.948	0.767	149.199	14234	1.878	0.532	0.9	0.988647
282	TTBK2_KAN550-13_3.tif:0010-0658	2.39	78.175	0	782	130.021	67.425	0.834	186.829	17824	1.408	0.71	0.912	1.238
283	TTBK2_KAN550-13_3.tif:0011-0718	1.467	45.214	0	231	89.949	73.542	0.942	66.35	6330	1.028	0.973	0.93	0.439661
284	TTBK2_KAN550-13_3.tif:0012-0967	1.625	50.852	0	287	99.296	99.076	0.832	82.618	7882	1.445	0.692	0.914	0.547458
285	TTBK2_KAN550-13_4.tif:0001-0135	1.698	127.247	0	768	60.362	13.84	0.946	216.073	20614	1.092	0.916	0.961	1.43178
286	TTBK2_KAN550-13_4.tif:0002-0173	1.929	131.402	0	310	34.497	17.711	0.882	253.43	24178	1.547	0.646	0.946	1.67933
287	TTBK2_KAN550-13_4.tif:0003-0238	1.74	98.819	0	813	99.425	24.399	0.87	171.944	16404	1.425	0.702	0.938	1.13937
288	TTBK2_KAN550-13_4.tif:0004-0249	2.254	91.526	0	1076	79.565	25.568	0.802	206.262	19678	1.062	0.942	0.872	1.36677
289	TTBK2_KAN550-13_4.tif:0005-0249	1.331	111.118	0	752	131.054	25.502	0.899	147.92	14112	1.237	0.809	0.948	0.980174
290	TTBK2_KAN550-13_4.tif:0006-0507	1.3	65.597	0	469	54.177	51.943	0.902	85.259	8134	1.162	0.861	0.943	0.564961
291	TTBK2_KAN550-13_4.tif:0007-0633	1.771	117.077	0	817	110.52	64.775	0.92	207.394	19786	1.135	0.881	0.929	1.37427
292	TTBK2_KAN550-13_4.tif:0008-0633	1.709	74.025	0	477	139.184	64.827	0.897	126.474	12066	1.267	0.789	0.929	0.838065
293	TTBK2_KAN550-13_4.tif:0009-0682	1.971	81.287	0	645	48.231	69.859	0.922	160.184	15282	1.215	0.823	0.947	1.06144
294	TTBK2_KAN550-13_4.tif:0010-0700	1.499	64.888	0	312	78.123	71.663	0.902	97.261	9279	1.39	0.72	0.932	0.644489
295	TTBK2_KAN550-13_4.tif:0011-0909	1.143	63.725	0	334	23.929	93.025	0.93	72.807	6946	1.209	0.827	0.928	0.482447
296	TTBK2_KAN550-13_4.tif:0012-0972	1.53	63.322	0	487	93.306	99.514	0.875	96.905	9245	1.437	0.696	0.921	0.642128
297	TTBK2_KAN550-13_4.tif:0013-1025	1.174	42.5	0	174	31.489	104.972	0.899	49.894	4760	1.158	0.863	0.937	0.330614
298	TTBK2_KAN550-13_5.tif:0001-0041	1.541	74.891	0	473	23.175	4.208	0.978	115.395	11009	1.16	0.862	0.927	0.764649
299	TTBK2_KAN550-13_5.tif:0002-0127	1.667	94.358	0	754	93.459	13.007	0.929	157.259	15003	1.13	0.885	0.949	1.04206
300	TTBK2_KAN550-13_5.tif:0003-0208	1.53	93.322	0	519	82.525	21.267	0.907	142.815	13625	1.229	0.813	0.945	0.946348
301	TTBK2_KAN550-13_5.tif:0004-0212	1.74	68.446	0	620	47.563	21.804	0.853	119.095	11362	1.541	0.649	0.922	0.789168
302	TTBK2_KAN550-13_5.tif:0005-0340	1.237	110.542	0	593	24.263	34.862	0.948	136.725	13044	1.13	0.885	0.948	0.905994
303	TTBK2_KAN550-13_5.tif:0006-0360	1.562	103.671	0	737	121.703	36.852	0.902	161.913	15447	1.23	0.813	0.949	1.0729
304	TTBK2_KAN550-13_5.tif:0007-0436	1.604	111.144	0	744	44.432	44.608	0.871	178.244	17005	1.305	0.766	0.939	1.18111
305	TTBK2_KAN550-13_5.tif:0008-0639	1.509	86.25	0	553	29.427	65.41	0.929	130.185	12420	1.178	0.849	0.973	0.862653
306	TTBK2_KAN550-13_5.tif:0009-0656	1.405	71.821	0	344	68.915	67.186	0.888	100.877	9624	1.547	0.646	0.954	0.668452
307	TTBK2_KAN550-13_5.tif:0010-0758	1.31	91.6	0	495	102.574	77.608	0.91	120.017	11450	1.184	0.845	0.94	0.79528
308	TTBK2_KAN550-13_5.tif:0011-0778	1.394	74.729	0	479	69.484	79.674	0.93	104.179	9939	1.52	0.658	0.957	0.690331
309	TTBK2_KAN550-13_5.tif:0012-0803	1.331	86.992	0	417	35.941	82.288	0.979	115.804	11048	1.215	0.823	0.966	0.767358
310	TTBK2_KAN550-13_5.tif:0013-0937	1.415	116.948	0	769	82.891	96.015	0.826	165.488	15788	1.155	0.866	0.931	1.09658
311	TTBK2_KAN550-13_6.tif:0001-0023	1.331	84.031	0	557	4.448	2.409	0.81	111.862	10672	1.504	0.665	0.879	0.741242
312	TTBK2_KAN550-13_6.tif:0002-0069	1.918	82.115	0	729	126.357	7.105	0.82	157.511	15027	1.112	0.899	0.915	1.04373
313	TTBK2_KAN550-13_6.tif:0003-0088	1.541	68.435	0	536	87.041	9.013	0.913	105.448	10060	1.201	0.833	0.945	0.698735
314	TTBK2_KAN550-13_6.tif:0004-0177	1.646	64.408	0	346	86.497	18.197	0.917	105.993	10112	1.098	0.911	0.94	0.702347
315	TTBK2_KAN550-13_6.tif:0005-0233	1.08	68.252	0	399	2.989	23.944	0.89	73.687	7030	1.253	0.798	0.928	0.488281
316	TTBK2_KAN550-13_6.tif:0006-0234	1.635	76.679	0	552	81.118	23.951	0.826	125.384	11962	1.547	0.647	0.951	0.830842
317	TTBK2_KAN550-13_6.tif:0007-0341	1.73	148.218	0	1191	60.654	34.946	0.978	256.344	24456	1.173	0.853	0.946	1.69863
318	TTBK2_KAN550-13_6.tif:0008-0393	1.247	89.16	0	464	17.037	40.259	0.842	111.213	10610	1.159	0.863	0.908	0.736936
319	TTBK2_KAN550-13_6.tif:0009-0545	1.405	104.881	0	595	87.93	55.864	0.964	147.312	14054	1.102	0.908	0.947	0.976145
320	TTBK2_KAN550-13_6.tif:0010-0578	1.583	112.172	0	835	110.37	59.22	0.873	177.542	16938	1.299	0.77	0.901	1.17646
321	TTBK2_KAN550-13_6.tif:0011-0613	1.342	90.992	0	525	33.994	62.736	0.931	122.082	11647	1.161	0.861	0.959	0.808963
322	TTBK2_KAN550-13_6.tif:0012-0617	1.541	52.762	0	472	70.406	63.233	0.789	81.297	7756	1.58	0.633	0.907	0.538707
323	TTBK2_KAN550-13_6.tif:0013-0715	1.551	82.649	0	638	24.165	73.243	0.896	128.214	12232	1.204	0.83	0.946	0.849595
324	TTBK2_KAN550-13_6.tif:0014-0916	1.635	111.513	0	894	70.726	93.757	0.898	182.342	17396	1.169	0.855	0.969	1.20827
										12426.7				0.863122

## Sheet: IF condition
Exp. number	Cell line	Gene induced	Culture condition, fixation condition	rabbit-Alexa488	mouse IgG1-Alexa568	mouse IgG2b-Alexa647	Nuclear stain	Date	Replicate
KAN550-1	RPE-BFP-Cas9 pMCB306 (pool)		serum starved for 24 hours, Fixed in 4% PFA at RT for 15 minutes.	TTBK2, SIGMA,HPA018113, 1:1000	CEP170, Invitrogen, 41-3200, 1:1000	Ac-Tub, 6B-11, Santa Cruz, 1:1000	DAPI	2020-10-19	No.1
KAN550-2	RPE-BFP-Cas9 CEP164KO (pool)		serum starved for 24 hours, Fixed in 4% PFA at RT for 15 minutes.	TTBK2, SIGMA,HPA018113, 1:1000	CEP170, Invitrogen, 41-3200, 1:1000	Ac-Tub, 6B-11, Santa Cruz, 1:1000	DAPI	2020-10-19	No.1
KAN550-3	RPE-BFP-Cas9 CEP83 KO (pool)		serum starved for 24 hours, Fixed in 4% PFA at RT for 15 minutes.	TTBK2, SIGMA,HPA018113, 1:1000	CEP170, Invitrogen, 41-3200, 1:1000	Ac-Tub, 6B-11, Santa Cruz, 1:1000	DAPI	2020-10-19	No.1
KAN550-4	RPE-BFP-Cas9 SCLT1 KO (pool)		serum starved for 24 hours, Fixed in 4% PFA at RT for 15 minutes.	TTBK2, SIGMA,HPA018113, 1:1000	CEP170, Invitrogen, 41-3200, 1:1000	Ac-Tub, 6B-11, Santa Cruz, 1:1000	DAPI	2020-10-19	No.1
KAN550-5	RPE-BFP-Cas9 FBF1 KO (pool)		serum starved for 24 hours, Fixed in 4% PFA at RT for 15 minutes.	TTBK2, SIGMA,HPA018113, 1:1000	CEP170, Invitrogen, 41-3200, 1:1000	Ac-Tub, 6B-11, Santa Cruz, 1:1000	DAPI	2020-10-19	No.1
KAN550-6	RPE-BFP-Cas9 CEP89KO (pool)		serum starved for 24 hours, Fixed in 4% PFA at RT for 15 minutes.	TTBK2, SIGMA,HPA018113, 1:1000	CEP170, Invitrogen, 41-3200, 1:1000	Ac-Tub, 6B-11, Santa Cruz, 1:1000	DAPI	2020-10-19	No.1
KAN550-7	RPE-BFP-Cas9 CCDC92 KO (pool)		serum starved for 24 hours, Fixed in 4% PFA at RT for 15 minutes.	TTBK2, SIGMA,HPA018113, 1:1000	CEP170, Invitrogen, 41-3200, 1:1000	Ac-Tub, 6B-11, Santa Cruz, 1:1000	DAPI	2020-10-19	No.1
KAN550-8	RPE-BFP-Cas9 ANKRD26 KO (pool)		serum starved for 24 hours, Fixed in 4% PFA at RT for 15 minutes.	TTBK2, SIGMA,HPA018113, 1:1000	CEP170, Invitrogen, 41-3200, 1:1000	Ac-Tub, 6B-11, Santa Cruz, 1:1000	DAPI	2020-10-19	No.1
KAN550-9	RPE-BFP-Cas9 TTBK2 KO (pool)		serum starved for 24 hours, Fixed in 4% PFA at RT for 15 minutes.	TTBK2, SIGMA,HPA018113, 1:1000	CEP170, Invitrogen, 41-3200, 1:1000	Ac-Tub, 6B-11, Santa Cruz, 1:1000	DAPI	2020-10-19	No.1
KAN550-10	RPE-BFP-Cas9 INPP5E KO (pool)		serum starved for 24 hours, Fixed in 4% PFA at RT for 15 minutes.	TTBK2, SIGMA,HPA018113, 1:1000	CEP170, Invitrogen, 41-3200, 1:1000	Ac-Tub, 6B-11, Santa Cruz, 1:1000	DAPI	2020-10-19	No.1
KAN550-11	RPE-BFP-Cas9 Kiz KO (pool)		serum starved for 24 hours, Fixed in 4% PFA at RT for 15 minutes.	TTBK2, SIGMA,HPA018113, 1:1000	CEP170, Invitrogen, 41-3200, 1:1000	Ac-Tub, 6B-11, Santa Cruz, 1:1000	DAPI	2020-10-19	No.1
KAN550-12	RPE-BFP-Cas9 sgPDE6D#1		serum starved for 24 hours, Fixed in 4% PFA at RT for 15 minutes.	TTBK2, SIGMA,HPA018113, 1:1000	CEP170, Invitrogen, 41-3200, 1:1000	Ac-Tub, 6B-11, Santa Cruz, 1:1000	DAPI	2020-10-19	No.1
KAN550-13	RPE-BFP-Cas9 sgLRRC45#1		serum starved for 24 hours, Fixed in 4% PFA at RT for 15 minutes.	TTBK2, SIGMA,HPA018113, 1:1000	CEP170, Invitrogen, 41-3200, 1:1000	Ac-Tub, 6B-11, Santa Cruz, 1:1000	DAPI	2020-10-19	No.1

## Sheet: After ROUT
sgGFP	CEP164KO	CEP83KO	SCLT1KO	FBF1KO	CEP89KO	CCDC92KO	ANKRD26KO	TTBK2KO	INPP5EKO	KIZ KO	sgLRRC45
0.464457	0.140858	0.156694	0.158431	1.68599	0.512591	1.32739	0.395209	0.0518842	1.26446	0.631501	1.2546
1.37927		0.412017	0.136552	1.20327	0.996843	0.82855	0.825077	0.0789029	1.01254	1.05887	0.57663
1.21258	0.322696		0.231499	0.698388	0.336518	2.28103	0.797294	0.173156	0.863625	0.837718	1.25585
1.1477	0.234833	0.165307	0.546138	1.92187	1.25696	1.52888	0.962462	0.072999	0.369996	1.3742	0.804101
1.50999	0.0881406	0.246016	0.218997	0.593716	0.810491	1.49443	0.661923	0.165099	0.848414	0.660812	0.921344
1.248	0.0663312	0.157597	0.154125	0.689497	0.491198	0.989411	0.301442	0.0919607	0.448968	0.445773	0.600037
1.2182	0.128287	0.205175	0.0931415	0.926136	0.596356	0.82341	0.468833	0.112381	1.08102	0.796669	1.87783
1.12832	0.12141	0.103629	0.130162	0.684288	1.17146	0.745827	0.251433	0.14572	0.90266	0.739506	0.970797
0.837787	0.154611		0.418963	2.08981	0.851887	0.443342	0.682552	0.195521	0.441884	0.5792	1.1086
1.21626	0.0668174	0.383123	0.11634	1.04609	0.864737	1.00434	0.920858	0.0894603	1.42213	0.415977	1.18285
1.32801	0.0450774	0.176767	0.181143	1.23494	1.00407	1.01303	0.430146	0.108353	1.05317	0.487239	0.532247
0.873141	0.0536206	0.233305	0.182463	0.812366	0.871543	1.74774	0.232263	0.0539679	0.702833	0.922316	1.15729
0.580797	0.0900159	0.0882795	0.194896	0.353604	0.869807	1.19959	1.3226	0.111756	0.573574	0.528774	0.520231
0.898145	0.158778	0.103213	0.508632	0.886824	1.50742	1.5309	0.0911967	0.0845289	0.304985	1.11631	0.667202
1.71162		0.131134	0.154194	1.70065	1.54083	0.626986	0.359925	0.0541763	0.111409	0.472723	1.47811
0.87578	0.250531	0.245252	0.125508	1.39157	0.55614	0.882934	0.482933	0.219414	1.43741	0.46022	1.50936
0.906202	0.149471	0.101963	0.314292	1.57736	2.19845	1.16034	1.05797	0.133496	0.473903	1.62355	0.382846
1.64446	0.196354	0.295747	0.343255	1.70016	0.660812	1.4297	0.494046	0.170794	0.728185	0.589132	1.13805
0.584131	0.127314	0.30297	0.262616	0.884949	0.504048	0.923011	0.767289	0.180379	1.08116	0.550723	1.23702
0.520648	0.186422	0.32735	0.249211	1.48519	1.05956	1.61925	1.06026	0.145512	1.37622	0.623444	0.909119
1.03282	0.273451	0.182741	0.216219	0.488767	1.74656	1.28106	1.08123	0.111548	0.852512	0.433271	1.43824
0.54336	0.083487	0.335059	0.130092	0.511132	0.757079	1.50096	0.797502	0.104324	1.20494	0.977048	0.949474
1.34017	0.103768	0.307971	0.0448691	0.969755	1.33579	1.12839	0.162737	0.0839732	0.8157	1.12423	0.737492
1.35468	0.0664701	0.110714	0.0551487	0.49731	0.975173	0.73645	0.342422	0.0468833	0.989203	1.1086	0.433619
0.723323	0.0962671	0.504187	0.0839038	0.599134	1.08415	1.53472	0.668591	0.0882101	0.602607	1.15902	0.787153
0.474251	0.166002	0.113145	0.252823	1.88964	0.833273	0.361245	1.06019	0.23143	0.260185	0.451955	0.729157
1.25335	0.145998	0.173364	0.109603	0.758398	0.746243	1.17271	0.51912	0.0661923	0.681579	0.870988	0.664423
0.994412	0.106269	0.134607	0.220525	1.52062	0.811741	1.09519	1.03581	0.0894603	1.26793	0.701652	0.861611
1.07873	0.189061	0.1892	0.15732	0.348881	0.889949	0.367079	0.91544	0.161695	1.12277	0.49099	0.769234
0.809588	0.235528	0.192117	0.0385485	1.45561	1.4456		0.970519	0.0917524	1.7426	1.08596	1.69294
0.868418	0.175587	0.296372	0.28387	0.841121	0.469805	0.965032	1.10763	0.0491059	0.915509	1.45713	1.23793
1.17208	0.145442	0.277758	0.197118	1.39247	0.411392	0.197049	0.121966	0.0807782	1.643	1.58299	1.32662
0.687136	0.20455		0.135232	1.44171	0.716516	0.543777	0.34777	0.163223	1.23577	0.443204	1.6423
1.22293	0.0837649	0.423825	0.125369	0.902313	1.34128	1.34906	0.416602	0.25824	1.31454	0.998024	1.03407
0.511896	0.0593855	0.258171	0.0582742	0.927456	0.174406	0.52287	0.907036	0.157389	0.669494	0.848206	0.777429
0.700888	0.150235	0.348603	0.174406	1.74455	0.720961	1.23828	0.10488	0.0492448	0.917038	0.778888	0.679912
0.91933	0.0527177	0.119118	0.491754	0.954614	1.07276	1.00018	0.371524	0.0560516	0.733463	0.889185
1.3401	0.0786251	0.0953641		0.798614	0.569059	1.81213	0.389375	0.0504256	0.657964	1.0272	0.964754
1.11686	0.096406	0.491129	0.171072	1.07818	1.04796	1.28182	1.27446	0.151555	0.595036	1.21431	0.565239
0.606983	0.074666	0.32346	0.0832092	0.674981	0.582256	0.115854	0.749855	0.164057	0.778888	0.169752	1.08776
0.71985	0.142247	0.0828619		0.342491	0.450149	2.84418	0.3925	0.141414	0.927456	0.773679	0.858138
1.31107	0.0615387	0.168224		0.210801	0.447788	1.07693	0.432785	0.087585	0.974826	0.745549	0.80417
0.85793	0.0954336	0.281369	0.115576	1.02949	0.437647	0.606635	1.1866	0.199549	1.4479	1.24258	0.726657
0.8937	0.0700819	0.132523	0.162946	0.879184	0.909397	0.782083	0.357911	0.165724	0.802503	1.24897	0.885296
0.539748	0.0671647	0.124189	0.326655	1.41706	1.80101	2.09363	0.596147	0.186214	1.25626	0.756384	1.33142
0.901827	0.0604968	0.0898076	0.0858485	0.242612	1.26314	0.800628	0.880017	0.155722	1.23195	0.268311	0.540512
0.469944	0.0403544	0.201633	0.141761	1.14263	1.1252	0.188575	1.004	0.119535	1.13284	1.1127	1.2355
1.21459	0.0382707	0.168294	0.18031	0.419866	0.339157	0.748466	0.228374	0.0957809	0.589966	0.907036	0.605246
1.88971	0.186422	0.105088	0.235945	1.12839	1.64564	2.01966	1.25029	0.116965	1.10568	0.86175	0.641016
0.580728	0.246988		0.327072	0.91801	0.746591	1.35177	0.945445	0.0992537	0.534748	0.152735	0.700332
0.419519	0.111895	0.40917	0.0861958	0.585729	0.868348	1.35448	0.576005	0.0955725	0.670188	0.801878	1.99681
0.591772	0.0970311	0.171419	0.143914	1.03178	0.728324	2.13343	0.677273	0.110575	0.40528	0.380901	0.721169
0.764094	0.1394	0.311236	0.13294	0.558293	0.694706	1.84797	0.443134	0.0809171	0.506687	0.783542	0.872863
1.10429	0.0897381	0.167044	0.245807	1.33301	1.11027	2.07912	0.301164	0.209343	2.13718	0.848553	1.06491
1.30384		0.253517	0.437022	0.715196	0.194132	1.17799		0.113631	0.821396	1.1641	0.733741
0.722211	0.101824	0.0725129	0.189547	0.911412	1.26849	1.25619		0.329711	0.865709	1.09242	0.596147
1.63001	0.0648032	0.269909	0.0653588	0.779722	0.888074	0.999483		0.289843	1.01358	0.930721	1.18167
1.72649	0.0693873	0.0861264	0.204064	0.791112	1.10221	0.209898		0.060983	0.722698	0.32853	0.414518
0.912731	0.0780694	0.152319	0.493768	1.28064	0.695818	0.711446		0.170239	1.54013	1.21931	1.41497
1.53229	0.0880017	0.156556	0.175309	0.886754	1.51819	0.499116		0.0711932	0.804795	0.542527	1.25349
1.10047	0.0623027	0.0961281	0.183019	0.515855	0.438689	1.51437		0.0798753	0.640252	0.657964	0.176698
1.94653	0.133288	0.226429	0.321793	0.608441	0.791251	0.962948		0.119118	0.791807	0.232055	0.540999
0.792015	0.238445			0.771526	1.34142	1.37024		0.0824452	0.820493	1.07068	0.507451
1.11214	0.152805	0.362773		1.1336	1.31544	1.22772		0.0759857	0.628931	0.560099	1.04324
0.810699	0.1253			0.476334	0.851401	2.02244		0.243168	1.087	1.77254	0.703527
0.393889	0.245946	0.115784		0.666993	1.29738	1.63779		0.100643	1.02504	0.960795	1.1377
0.7211	0.127939	0.468903		1.30773	0.655116	1.26481		0.135302	1.68099	0.458276	0.860986
	0.224901	0.168433		0.969964	0.978229	0.635321		0.0945306	0.760968	1.31357	1.05345
	0.171558	0.169266		0.589549	0.996288	0.863139		0.098698	0.57149	1.19445	0.326586
	0.149054	0.284773		1.08658	1.1368	0.890991		0.241432	1.00351	0.48196	0.648934
	0.14572	0.20969			1.03435	0.916135		0.0751522	0.579617	1.30252	1.08325
	0.147179	0.155444			1.36066	1.66745		0.158014	0.481335	1.63807	1.11909
	0.0850151				1.50756	0.384582		0.133843	0.553154	0.839315	0.876058
	0.0941139	0.141831			2.13142	1.94479		0.136621	1.67564	1.1475	0.728879
	0.0499394	0.191631			0.275327	0.475431		0.0463971	0.420561	0.72624	0.952599
	0.0407017	0.365065			0.841538	1.81185		0.103768	1.30127	0.58177	0.520578
	0.119882	0.313806			1.10631	2.17282		0.0564683	1.19382	0.553293	0.754648
	0.233861	0.306443			0.658867	1.42741			0.574199
	0.170377	0.262199			0.653449	0.330823
	0.0784167	0.205453				1.51596
	0.239626	0.390139				0.972881
	0.101407	0.0938361				1.20389
	0.143498	0.109255				1.04018
		0.0882101				0.565031
	0.0741104	0.0805004				1.81046
	0.164474	0.191492				1.06338
	0.188297	0.0960587				0.58302
	0.162876	0.1726				0.31582
	0.14954	0.120577				0.609414
	0.0703597	0.124258				0.911342
		0.203786				0.466402
		0.095642				1.20244
						0.719364
						0.550167
						1.2023
						1.12416
						1.7385
						1.33399
						1.01233
						0.468972
						0.784097
						1.18882
