# Supplementary material for: A hierarchical pathway for assembly of the distal appendages that organize primary cilia
Source: eLife. 2025 Jan 30;14:e85999. doi: 10.7554/eLife.85999 (PMC11984956; doi:10.7554/eLife.85999)
Supplement: Figure 2—source data 9. [file elife-85999-fig2-data9.xlsx]

## Sheet: Raw Data
	Label	Area	Mean	Min	Max	X	Y	Circ	IntDen	RawIntDen	AR	Round	Solidity
319	KIZ_KAN623-1_1.tif:0001-0097	1.185	135.946	0	507	3.002	11.061	0.927	161.118	12507	1.286	0.778	0.963
320	KIZ_KAN623-1_1.tif:0002-0159	1.752	190.169	0	1346	32.882	18.031	0.911	333.174	25863	1.061	0.943	0.982
321	KIZ_KAN623-1_1.tif:0003-0186	1.907	123.777	0	669	49.004	21.095	0.852	235.99	18319	1.305	0.767	0.937
322	KIZ_KAN623-1_1.tif:0004-0206	2.113	101.091	0	705	122.992	23.356	0.775	213.575	16579	1.603	0.624	0.896
323	KIZ_KAN623-1_1.tif:0005-0273	1.816	129.872	0	1072	18.423	30.991	0.746	235.9	18312	1.647	0.607	0.879
324	KIZ_KAN623-1_1.tif:0006-0287	1.366	168.745	0	811	119.393	32.642	0.957	230.425	17887	1.094	0.914	0.981
325	KIZ_KAN623-1_1.tif:0007-0302	2.074	114.932	0	949	74.067	34.313	0.895	238.373	18504	1.194	0.837	0.95
326	KIZ_KAN623-1_1.tif:0008-0432	1.378	145.785	0	627	9.368	49.026	0.881	200.95	15599	1.334	0.75	0.995
327	KIZ_KAN623-1_1.tif:0009-0432	2.357	118.541	0	988	63.487	49.134	0.865	279.455	21693	1.376	0.727	0.943
328	KIZ_KAN623-1_1.tif:0010-0533	1.043	181.494	0	874	44.095	60.552	0.899	189.382	14701	1	1	1
329	KIZ_KAN623-1_1.tif:0011-0602	1.378	170.776	0	1037	28.37	68.388	0.908	235.397	18273	1.127	0.887	0.986
330	KIZ_KAN623-1_1.tif:0012-0706	1.971	137.817	0	870	133.65	80.202	0.859	271.635	21086	1.444	0.693	0.965
331	KIZ_KAN623-1_1.tif:0013-0741	1.997	132.458	0	981	112.345	84.166	0.82	264.486	20531	1.363	0.734	0.923
332	KIZ_KAN623-1_1.tif:0014-0758	1.855	146.271	0	1288	74.491	86.054	0.837	271.339	21063	1.551	0.645	0.98
333	KIZ_KAN623-1_1.tif:0015-0878	1.043	148.185	0	533	52.494	99.71	0.899	154.626	12003	1	1	1
334	KIZ_KAN623-1_1.tif:0016-1030	2.254	154.291	0	1357	89.193	116.91	0.875	347.834	27001	1.39	0.72	0.959
335	KIZ_KAN623-1_1.tif:0017-1097	1.211	101.872	0	349	4.53	124.5	0.979	123.36	9576	1.046	0.956	0.974
336	KIZ_KAN623-1_1.tif:0018-1229	1.043	180.556	0	780	105.952	139.548	0.899	188.403	14625	1	1	1
337	KIZ_KAN623-1_1.tif:0019-1265	1.275	163.727	0	872	87.679	143.634	0.877	208.808	16209	1.222	0.818	1
338	KIZ_KAN623-1_2.tif:0001-0149	1.378	170.178	0	787	16.916	16.963	0.936	234.573	18209	1.102	0.907	0.986
339	KIZ_KAN623-1_2.tif:0002-0160	2.177	189.852	0	1488	43.011	18.234	0.916	413.327	32085	1.113	0.898	0.968
340	KIZ_KAN623-1_2.tif:0003-0194	1.546	12.3	0	64	141.07	22.093	0.964	19.014	1476	1.104	0.906	0.96
341	KIZ_KAN623-1_2.tif:0004-0196	2.113	105.915	0	645	99.006	22.317	0.859	223.765	17370	1.433	0.698	0.937
342	KIZ_KAN623-1_2.tif:0005-0235	2.023	191.248	0	1474	105.294	26.761	0.904	386.802	30026	1.099	0.91	0.966
343	KIZ_KAN623-1_2.tif:0006-0383	1.366	149.981	0	805	24.026	43.487	0.899	204.802	15898	1.123	0.89	0.986
344	KIZ_KAN623-1_2.tif:0007-0404	1.804	150.071	0	987	84.223	45.873	0.741	270.656	21010	1.609	0.622	0.875
345	KIZ_KAN623-1_2.tif:0008-0409	1.275	192.949	0	875	52.318	46.427	0.905	246.077	19102	1.025	0.975	0.995
346	KIZ_KAN623-1_2.tif:0009-0421	1.159	174.578	0	770	5.448	47.84	0.89	202.406	15712	1.111	0.9	1
347	KIZ_KAN623-1_2.tif:0010-0491	0.631	48.449	0	120	138.073	55.785	0.935	30.582	2374	1	1	1
348	KIZ_KAN623-1_2.tif:0011-0497	2.383	197.638	0	2134	117.225	56.461	0.916	471.014	36563	1.283	0.779	0.961
349	KIZ_KAN623-1_2.tif:0012-0576	1.765	214.453	0	1440	91.112	65.357	0.918	378.481	29380	1.077	0.929	0.986
350	KIZ_KAN623-1_2.tif:0013-0604	1.043	202.852	0	530	59.531	68.611	0.899	211.668	16431	1	1	1
351	KIZ_KAN623-1_2.tif:0014-0645	1.868	162.814	0	1201	18.027	73.253	0.935	304.124	23608	1.29	0.775	0.973
352	KIZ_KAN623-1_2.tif:0015-0656	1.842	160.483	0	1010	67.95	74.459	0.922	295.635	22949	1.122	0.891	0.96
353	KIZ_KAN623-1_2.tif:0016-0706	2.061	116.975	0	741	111.77	80.204	0.889	241.104	18716	1.283	0.779	0.95
354	KIZ_KAN623-1_2.tif:0017-0787	2.37	168.402	0	1402	49.703	89.323	0.882	399.169	30986	1.371	0.73	0.927
355	KIZ_KAN623-1_2.tif:0018-0807	1.378	194.411	0	1223	32.352	91.647	0.908	267.977	20802	1.127	0.887	0.986
356	KIZ_KAN623-1_2.tif:0019-0888	1.262	173.888	0	1010	17.139	100.788	0.925	219.526	17041	1.052	0.95	0.99
357	KIZ_KAN623-1_2.tif:0020-0931	1.894	177.905	0	1575	87.448	105.653	0.9	336.897	26152	1.274	0.785	0.98
358	KIZ_KAN623-1_2.tif:0021-0967	1.275	167.566	0	663	37.852	109.811	0.877	213.704	16589	1.222	0.818	1
359	KIZ_KAN623-1_2.tif:0022-1001	1.147	35.461	0	154	125.315	113.619	0.927	40.656	3156	1.216	0.822	0.947
360	KIZ_KAN623-1_2.tif:0023-1149	1.159	183.622	0	1012	75.024	130.468	0.89	212.892	16526	1.111	0.9	1
361	KIZ_KAN623-1_3.tif:0001-0087	1.971	144.431	0	760	57.672	9.853	0.926	284.672	22098	1.228	0.814	0.965
362	KIZ_KAN623-1_3.tif:0002-0154	1.662	216.132	0	1176	34.346	17.465	0.898	359.17	27881	1.107	0.903	0.992
363	KIZ_KAN623-1_3.tif:0003-0284	2.1	158.945	0	1430	113.17	32.319	0.928	333.753	25908	1.062	0.941	0.959
364	KIZ_KAN623-1_3.tif:0004-0291	1.597	159.903	0	988	12.477	33.093	0.939	255.429	19828	1.089	0.918	0.973
365	KIZ_KAN623-1_3.tif:0005-0335	2.473	152.438	0	1395	83.087	38.001	0.86	377.038	29268	1.341	0.746	0.939
366	KIZ_KAN623-1_3.tif:0006-0351	2.873	149.502	0	1214	97.184	39.875	0.874	429.481	33339	1.402	0.713	0.947
367	KIZ_KAN623-1_3.tif:0007-0440	2.203	115.368	0	1001	26.115	49.893	0.733	254.141	19728	1.631	0.613	0.877
368	KIZ_KAN623-1_3.tif:0008-0450	2.177	207.651	0	1659	121.015	51.169	0.916	452.077	35093	1.137	0.879	0.98
369	KIZ_KAN623-1_3.tif:0009-0554	1.43	40.45	0	153	38.98	62.953	0.959	57.841	4490	1.164	0.859	0.974
370	KIZ_KAN623-1_3.tif:0010-0558	2.087	140.728	0	1261	134.933	63.384	0.878	293.69	22798	1.325	0.755	0.956
371	KIZ_KAN623-1_3.tif:0011-0585	2.525	154.622	0	1259	73.84	66.451	0.918	390.41	30306	1.205	0.83	0.951
372	KIZ_KAN623-1_3.tif:0012-0666	1.868	150.966	0	1014	132.201	75.669	0.935	281.992	21890	1.079	0.927	0.976
373	KIZ_KAN623-1_3.tif:0013-0784	1.881	169.822	0	1195	52.86	88.965	0.917	319.403	24794	1.105	0.905	0.97
374	KIZ_KAN623-1_3.tif:0014-0812	1.662	132.868	0	903	23.103	92.222	0.864	220.802	17140	1.245	0.803	0.952
375	KIZ_KAN623-1_3.tif:0015-0872	1.894	220.034	0	1273	130.447	98.947	0.9	416.676	32345	1.085	0.922	0.97
376	KIZ_KAN623-1_3.tif:0016-0917	1.868	151.455	0	1132	88.343	104.084	0.878	282.907	21961	1.093	0.915	0.932
377	KIZ_KAN623-1_3.tif:0017-0965	1.327	5.388	0	24	1.423	109.534	0.901	7.15	555	1.35	0.741	0.976
378	KIZ_KAN623-1_3.tif:0018-0982	1.301	58.693	0	145	15.497	111.462	0.972	76.366	5928	1.123	0.89	0.967
379	KIZ_KAN623-1_3.tif:0019-1006	2.242	186.822	0	1660	108.49	114.219	0.934	418.763	32507	1.038	0.963	0.959
380	KIZ_KAN623-1_3.tif:0020-1048	1.971	179.503	0	1024	68.869	118.931	0.926	353.798	27464	1.183	0.846	0.959
381	KIZ_KAN623-1_3.tif:0021-1087	1.211	10.074	0	55	31.019	123.437	0.917	12.199	947	1.229	0.814	0.979
382	KIZ_KAN623-1_3.tif:0022-1096	1.043	168.765	0	619	68.27	124.453	0.899	176.1	13670	1	1	1
383	KIZ_KAN623-1_3.tif:0023-1183	1.211	150.702	0	886	36.664	134.267	0.887	182.49	14166	1.138	0.879	0.969
384	KIZ_KAN623-1_3.tif:0024-1218	1.894	118.891	0	766	142.677	138.236	0.89	225.143	17477	1.355	0.738	0.951
385	KIZ_KAN623-1_4.tif:0001-0037	2.048	132.195	0	1028	37.332	4.241	0.862	270.772	21019	1.414	0.707	0.946
386	KIZ_KAN623-1_4.tif:0002-0131	0.992	68	0	295	15.782	14.863	0.917	67.451	5236	1.277	0.783	0.981
387	KIZ_KAN623-1_4.tif:0003-0147	2.164	119.75	0	828	75.946	16.736	0.933	259.165	20118	1.181	0.847	0.971
388	KIZ_KAN623-1_4.tif:0004-0263	1.262	190	0	864	11.918	29.851	0.925	239.868	18620	1.052	0.95	0.99
389	KIZ_KAN623-1_4.tif:0005-0264	1.804	175.607	0	908	60.27	30.039	0.903	316.71	24585	1.219	0.821	0.962
390	KIZ_KAN623-1_4.tif:0006-0320	1.816	95.78	0	1184	91.699	36.317	0.783	173.975	13505	1.43	0.699	0.887
391	KIZ_KAN623-1_4.tif:0007-0336	1.997	119.413	0	823	127.989	38.152	0.861	238.438	18509	1.305	0.766	0.939
392	KIZ_KAN623-1_4.tif:0008-0425	1.739	149.748	0	1143	21.866	48.28	0.904	260.428	20216	1.229	0.814	0.982
393	KIZ_KAN623-1_4.tif:0009-0443	2.164	134.923	0	708	58.217	50.347	0.889	292.002	22667	1.305	0.767	0.971
394	KIZ_KAN623-1_4.tif:0010-0489	1.816	163.83	0	1484	116.179	55.499	0.934	297.58	23100	1.072	0.933	0.956
395	KIZ_KAN623-1_4.tif:0011-0561	2.422	141.824	0	1355	91.676	63.751	0.806	343.479	26663	1.533	0.652	0.926
396	KIZ_KAN623-1_4.tif:0012-0633	2.28	182.712	0	1631	73.661	71.843	0.885	416.612	32340	1.401	0.714	0.962
397	KIZ_KAN623-1_4.tif:0013-0649	1.739	177.852	0	890	133.849	73.718	0.904	309.303	24010	1.203	0.831	0.975
398	KIZ_KAN623-1_4.tif:0014-0666	2.357	115.066	0	826	129.026	75.674	0.846	271.262	21057	1.3	0.769	0.943
399	KIZ_KAN623-1_4.tif:0015-0666	1.469	154.719	0	1085	34.42	75.57	0.874	227.217	17638	1.216	0.823	0.974
400	KIZ_KAN623-1_4.tif:0016-0710	1.958	125.908	0	788	97.511	80.584	0.897	246.541	19138	1.247	0.802	0.959
401	KIZ_KAN623-1_4.tif:0017-0725	2.628	160.525	0	1637	88.349	82.314	0.758	421.855	32747	1.615	0.619	0.905
402	KIZ_KAN623-1_4.tif:0018-0835	2.151	147.754	0	1451	112.881	94.761	0.79	317.87	24675	1.48	0.676	0.893
403	KIZ_KAN623-1_4.tif:0019-0971	1.765	181.73	0	1204	38.518	110.258	0.918	320.729	24897	1.201	0.832	0.982
404	KIZ_KAN623-1_4.tif:0020-0993	2.126	112.424	0	599	74.694	112.708	0.886	238.966	18550	1.321	0.757	0.935
405	KIZ_KAN623-1_4.tif:0021-1047	1.842	136.014	0	876	112.459	118.911	0.783	250.56	19450	1.563	0.64	0.929
406	KIZ_KAN623-1_4.tif:0022-1201	2.023	101.248	0	833	44.578	136.349	0.86	204.776	15896	1.402	0.713	0.978
407	KIZ_KAN623-1_4.tif:0023-1271	1.456	69.336	0	340	128.617	144.255	0.919	100.932	7835	1.222	0.818	0.974
408	KIZ_KAN623-1_5.tif:0001-0103	1.61	170.472	0	948	43.088	11.709	0.895	274.508	21309	1.302	0.768	0.98
409	KIZ_KAN623-1_5.tif:0002-0167	2.164	134.47	0	1155	127.717	19.032	0.813	291.023	22591	1.563	0.64	0.916
410	KIZ_KAN623-1_5.tif:0003-0193	1.765	134.073	0	655	134.796	21.955	0.788	236.621	18368	1.447	0.691	0.895
411	KIZ_KAN623-1_5.tif:0004-0239	1.739	171.748	0	1464	41.965	27.186	0.904	298.688	23186	1.183	0.845	0.975
412	KIZ_KAN623-1_5.tif:0005-0315	1.688	181.435	0	1514	101.879	35.847	0.927	306.185	23768	1.187	0.843	0.96
413	KIZ_KAN623-1_5.tif:0006-0400	2.499	127.448	0	1482	84.023	45.46	0.79	318.514	24725	1.646	0.608	0.924
414	KIZ_KAN623-1_5.tif:0007-0432	0.721	23.143	0	132	10.272	49.032	0.92	16.695	1296	1.143	0.875	1
415	KIZ_KAN623-1_5.tif:0008-0447	0.915	33.127	0	149	39.675	50.74	0.924	30.299	2352	1.13	0.885	0.993
416	KIZ_KAN623-1_5.tif:0009-0487	1.855	194.319	0	1021	108.02	55.268	0.98	360.471	27982	1.102	0.908	0.973
417	KIZ_KAN623-1_5.tif:0010-0495	1.391	209.296	0	1191	93.581	56.183	0.916	291.19	22604	1.112	0.9	0.991
418	KIZ_KAN623-1_5.tif:0011-0709	1.043	169.062	0	553	70.881	80.528	0.899	176.41	13694	1	1	1
419	KIZ_KAN623-1_5.tif:0012-0743	2.048	115.648	0	959	107.621	84.367	0.822	236.879	18388	1.597	0.626	0.949
420	KIZ_KAN623-1_5.tif:0013-0831	1.868	171.993	0	1267	139.645	94.349	0.834	321.27	24939	1.304	0.767	0.924
421	KIZ_KAN623-1_5.tif:0014-0846	2.448	118.126	0	1273	122.61	96.04	0.736	289.129	22444	1.751	0.571	0.876
422	KIZ_KAN623-1_5.tif:0015-0855	1.726	124.194	0	828	50.745	97.064	0.692	214.386	16642	1.74	0.575	0.854
423	KIZ_KAN623-1_5.tif:0016-0998	2.461	132.33	0	1145	115	113.277	0.855	325.599	25275	1.32	0.758	0.934
424	KIZ_KAN623-1_5.tif:0017-1011	2.538	114.147	0	1007	73.048	114.71	0.827	289.683	22487	1.55	0.645	0.963
										19798.1
425	KIZ_KAN623-2_1.tif:0001-0016	1.894	176.034	0	1118	56.868	1.867	0.923	333.354	25877	1.099	0.91	0.974
426	KIZ_KAN623-2_1.tif:0002-0016	2.538	155.873	0	1249	104.809	1.817	0.845	395.575	30707	1.529	0.654	0.966
427	KIZ_KAN623-2_1.tif:0003-0067	2.589	145.478	0	1529	139.103	7.601	0.818	376.69	29241	1.45	0.69	0.926
428	KIZ_KAN623-2_1.tif:0004-0138	1.765	167.423	0	939	21.32	15.641	0.918	295.48	22937	1.04	0.962	0.979
429	KIZ_KAN623-2_1.tif:0005-0138	1.481	143.2	0	388	69.992	15.713	0.935	212.145	16468	1.078	0.927	0.979
430	KIZ_KAN623-2_1.tif:0006-0207	1.765	150.007	0	1059	72.706	23.552	0.918	264.743	20551	1.179	0.848	0.979
431	KIZ_KAN623-2_1.tif:0007-0297	1.855	124.604	0	544	25.588	33.739	0.929	231.146	17943	1.121	0.892	0.97
432	KIZ_KAN623-2_1.tif:0008-0310	2.177	204.515	0	1583	80.264	35.187	0.886	445.249	34563	1.272	0.786	0.942
433	KIZ_KAN623-2_1.tif:0009-0320	1.842	184.944	0	1094	6.807	36.34	0.947	340.697	26447	1.083	0.923	0.969
434	KIZ_KAN623-2_1.tif:0010-0351	1.791	9.532	0	51	66.277	39.889	0.946	17.069	1325	1.191	0.84	0.962
435	KIZ_KAN623-2_1.tif:0011-0354	2.126	185.212	0	1699	41.448	40.261	0.94	393.682	30560	1.104	0.906	0.971
436	KIZ_KAN623-2_1.tif:0012-0372	1.778	242.254	0	2078	112.887	42.275	0.924	430.667	33431	1.189	0.841	0.986
437	KIZ_KAN623-2_1.tif:0013-0451	2.319	163.089	0	1542	127.811	51.275	0.789	378.171	29356	1.514	0.661	0.905
438	KIZ_KAN623-2_1.tif:0014-0469	2.254	191.8	0	1785	89.442	53.253	0.917	432.393	33565	1.162	0.861	0.964
439	KIZ_KAN623-2_1.tif:0015-0558	2.615	191.488	0	950	11.58	63.324	0.786	500.759	38872	1.552	0.644	0.91
440	KIZ_KAN623-2_1.tif:0016-0577	1.404	209.505	0	1145	32.352	65.541	0.897	294.179	22836	1.103	0.907	0.995
441	KIZ_KAN623-2_1.tif:0017-0607	1.726	196.888	0	1536	69.423	68.937	0.922	339.872	26383	1.182	0.846	0.971
442	KIZ_KAN623-2_1.tif:0018-0644	2.177	210.266	0	1584	111.177	73.098	0.916	457.771	35535	1.155	0.866	0.971
443	KIZ_KAN623-2_1.tif:0019-0796	2.345	162.593	0	1158	101.705	90.351	0.91	381.212	29592	1.32	0.757	0.978
444	KIZ_KAN623-2_1.tif:0020-0841	1.675	134.138	0	729	57.173	95.51	0.895	224.641	17438	1.256	0.796	0.959
445	KIZ_KAN623-2_1.tif:0021-0852	1.481	56.557	0	210	117.652	96.75	0.964	83.786	6504	1.039	0.963	0.979
446	KIZ_KAN623-2_1.tif:0022-0915	1.765	183.664	0	1225	73.279	103.918	0.918	324.143	25162	1.176	0.85	0.982
447	KIZ_KAN623-2_1.tif:0023-0947	1.237	83.833	0	216	37.611	107.546	0.906	103.676	8048	1.229	0.814	0.985
448	KIZ_KAN623-2_1.tif:0024-1026	1.945	188.907	0	1422	132.913	116.456	0.891	367.466	28525	1.211	0.826	0.953
449	KIZ_KAN623-2_1.tif:0025-1061	2.113	125.311	0	784	80.515	120.445	0.82	264.743	20551	1.515	0.66	0.932
450	KIZ_KAN623-2_2.tif:0001-0047	1.816	84.865	0	261	107.054	5.388	0.96	154.149	11966	1.101	0.908	0.966
451	KIZ_KAN623-2_2.tif:0002-0072	1.739	122.704	0	549	83.969	8.178	0.955	213.395	16565	1.018	0.982	0.971
452	KIZ_KAN623-2_2.tif:0003-0103	0.721	177.929	0	521	54.65	11.691	0.92	128.359	9964	1.143	0.875	1
453	KIZ_KAN623-2_2.tif:0004-0136	1.881	179.849	0	1025	48.58	15.509	0.942	338.262	26258	1.129	0.886	0.973
454	KIZ_KAN623-2_2.tif:0005-0209	2.293	206.933	0	1987	39.866	23.752	0.911	474.505	36834	1.137	0.879	0.965
455	KIZ_KAN623-2_2.tif:0006-0212	2.126	125.164	0	690	9.995	24.058	0.844	266.044	20652	1.34	0.746	0.919
456	KIZ_KAN623-2_2.tif:0007-0275	0.631	8.041	0	36	46.705	31.269	0.935	5.076	394	1	1	1
457	KIZ_KAN623-2_2.tif:0008-0307	1.855	223.486	0	1837	104.094	34.922	0.881	414.577	32182	1.165	0.858	0.963
458	KIZ_KAN623-2_2.tif:0009-0327	1.134	133.75	0	581	45.23	37.126	0.93	151.624	11770	1.11	0.901	0.989
459	KIZ_KAN623-2_2.tif:0010-0391	2.01	164.282	0	749	135.868	44.369	0.921	330.146	25628	1.18	0.847	0.969
460	KIZ_KAN623-2_2.tif:0011-0426	1.765	176.869	0	585	49.508	48.354	0.918	312.15	24231	1.026	0.975	0.979
461	KIZ_KAN623-2_2.tif:0012-0448	1.456	189.664	0	553	70.54	50.887	0.947	276.092	21432	1.081	0.925	0.966
462	KIZ_KAN623-2_2.tif:0013-0510	1.919	162.503	0	1164	48.144	57.953	0.866	311.918	24213	1.291	0.775	0.983
463	KIZ_KAN623-2_2.tif:0014-0543	2.203	175.854	0	1612	113.191	61.701	0.863	387.382	30071	1.283	0.78	0.977
464	KIZ_KAN623-2_2.tif:0015-0667	1.881	155.452	0	817	142.404	75.679	0.871	292.376	22696	1.298	0.77	0.977
465	KIZ_KAN623-2_2.tif:0016-0695	2.035	262.614	0	1794	108.211	78.95	0.957	534.523	41493	1.101	0.909	0.978
466	KIZ_KAN623-2_2.tif:0017-0696	2.151	171.365	0	1339	88.659	79.076	0.863	368.664	28618	1.496	0.668	0.977
467	KIZ_KAN623-2_2.tif:0018-0699	2.332	240.227	0	2285	77.668	79.366	0.926	560.133	43481	1.162	0.861	0.976
468	KIZ_KAN623-2_2.tif:0019-0714	1.507	160.35	0	740	19.29	81.043	0.924	241.684	18761	1.2	0.833	0.987
469	KIZ_KAN623-2_2.tif:0020-0789	2.512	161.267	0	1714	104.062	89.607	0.854	405.108	31447	1.393	0.718	0.944
470	KIZ_KAN623-2_2.tif:0021-0816	2.1	132.877	0	851	35.283	92.649	0.863	279.017	21659	1.332	0.751	0.95
471	KIZ_KAN623-2_2.tif:0022-0854	2.151	200.18	0	1451	79.586	97.006	0.928	430.654	33430	1.106	0.904	0.965
472	KIZ_KAN623-2_2.tif:0023-0921	1.301	141.723	0	709	137.837	104.535	0.912	184.397	14314	1.15	0.869	0.957
473	KIZ_KAN623-2_2.tif:0024-0959	1.791	142.065	0	641	71.693	108.903	0.82	254.386	19747	1.421	0.704	0.908
474	KIZ_KAN623-2_2.tif:0025-0986	1.984	150.162	0	1063	26.406	111.878	0.835	297.902	23125	1.402	0.713	0.942
475	KIZ_KAN623-2_2.tif:0026-1030	1.494	195.888	0	1314	99.388	116.976	0.889	292.723	22723	1.048	0.954	0.979
476	KIZ_KAN623-2_2.tif:0027-1122	1.765	194.146	0	945	134.72	127.351	0.943	342.642	26598	1.05	0.952	0.979
477	KIZ_KAN623-2_2.tif:0028-1155	1.391	186.824	0	1044	1.031	131.149	0.916	259.925	20177	1.1	0.909	0.991
478	KIZ_KAN623-2_2.tif:0029-1191	1.391	177.546	0	966	57.601	135.179	0.916	247.017	19175	1.112	0.9	0.991
479	KIZ_KAN623-2_2.tif:0030-1271	1.494	193.474	0	1210	135.003	144.319	0.916	289.116	22443	1.105	0.905	0.983
480	KIZ_KAN623-2_3.tif:0001-0046	2.19	199.4	0	1760	129.476	5.249	0.878	436.683	33898	1.28	0.782	0.977
481	KIZ_KAN623-2_3.tif:0002-0101	2.293	168.961	0	1511	83.141	11.527	0.869	387.434	30075	1.254	0.797	0.962
482	KIZ_KAN623-2_3.tif:0003-0159	1.907	160.676	0	1018	110.236	18.09	0.883	306.34	23780	1.275	0.784	0.983
483	KIZ_KAN623-2_3.tif:0004-0163	2.177	183.083	0	2055	137.749	18.569	0.865	398.59	30941	1.359	0.736	0.947
484	KIZ_KAN623-2_3.tif:0005-0258	2.01	200.75	0	1726	55.003	29.35	0.921	403.433	31317	1.067	0.937	0.969
485	KIZ_KAN623-2_3.tif:0006-0262	1.585	7.691	0	56	119.73	29.722	0.847	12.187	946	1.317	0.759	0.921
486	KIZ_KAN623-2_3.tif:0007-0272	2.216	208.872	0	1594	91.972	30.887	0.91	462.808	35926	1.071	0.933	0.975
487	KIZ_KAN623-2_3.tif:0008-0319	1.404	212.725	0	1092	20.822	36.202	0.897	298.701	23187	1.103	0.907	0.995
488	KIZ_KAN623-2_3.tif:0009-0357	2.512	12.221	0	69	84.738	40.589	0.934	30.698	2383	1.289	0.776	0.965
489	KIZ_KAN623-2_3.tif:0010-0401	1.907	232.311	0	1406	117.7	45.553	0.954	442.918	34382	1.081	0.925	0.98
490	KIZ_KAN623-2_3.tif:0011-0436	1.932	281.28	0	2001	67.93	49.486	0.942	543.528	42192	1.094	0.914	0.98
491	KIZ_KAN623-2_3.tif:0012-0577	1.404	204.734	0	981	48.413	65.494	0.897	287.48	22316	1.103	0.907	0.995
492	KIZ_KAN623-2_3.tif:0013-0606	1.675	5.931	0	30	58.74	68.849	0.92	9.932	771	1.24	0.807	0.963
493	KIZ_KAN623-2_3.tif:0014-0618	1.52	163.907	0	1234	8.853	70.134	0.905	249.156	19341	1.2	0.834	0.992
494	KIZ_KAN623-2_3.tif:0015-0688	1.932	232.893	0	2145	66.39	78.064	0.885	450.029	34934	1.266	0.79	0.949
495	KIZ_KAN623-2_3.tif:0016-0725	2.396	226.376	0	1665	91.18	82.34	0.9	542.42	42106	1.264	0.791	0.956
496	KIZ_KAN623-2_3.tif:0017-0792	1.237	40.969	0	116	32.45	89.883	0.936	50.666	3933	1.007	0.993	0.98
497	KIZ_KAN623-2_3.tif:0018-0797	1.61	168.336	0	924	128.969	90.492	0.895	271.068	21042	1.133	0.882	0.977
498	KIZ_KAN623-2_3.tif:0019-0929	1.417	220.845	0	1159	75.591	105.498	0.879	312.949	24293	1.1	0.909	1
499	KIZ_KAN623-2_3.tif:0020-0968	1.559	148.132	0	1096	55.758	109.883	0.842	230.901	17924	1.333	0.75	0.964
500	KIZ_KAN623-2_3.tif:0021-0983	0.902	158.271	4	435	35.639	111.627	0.947	142.722	11079	1.146	0.873	0.986
501	KIZ_KAN623-2_3.tif:0022-1018	1.958	228.033	0	1873	111.154	115.553	0.875	446.512	34661	1.19	0.84	0.95
502	KIZ_KAN623-2_3.tif:0023-1101	1.752	168.14	0	832	143.01	124.964	0.962	294.578	22867	1.068	0.936	0.978
503	KIZ_KAN623-2_3.tif:0024-1273	1.056	216.39	0	682	84.573	144.549	0.838	228.583	17744	1.699	0.589	0.988
504	KIZ_KAN623-2_4.tif:0001-0009	2.28	182.175	0	1286	42.826	0.982	0.864	415.388	32245	1.396	0.716	0.967
505	KIZ_KAN623-2_4.tif:0002-0081	1.868	200.359	0	1521	66.181	9.246	0.935	374.255	29052	1.171	0.854	0.976
506	KIZ_KAN623-2_4.tif:0003-0098	2.628	170.544	0	2095	95.629	11.171	0.841	448.186	34791	1.426	0.701	0.909
507	KIZ_KAN623-2_4.tif:0004-0117	1.275	222.848	0	1199	9.312	13.274	0.905	284.208	22062	1.025	0.975	0.995
508	KIZ_KAN623-2_4.tif:0005-0166	2.357	159.066	0	1609	38.249	18.916	0.885	374.989	29109	1.375	0.727	0.948
509	KIZ_KAN623-2_4.tif:0006-0183	2.113	226.585	0	1900	113.392	20.784	0.911	478.704	37160	1.276	0.783	0.965
510	KIZ_KAN623-2_4.tif:0007-0229	1.688	94.328	0	457	83.722	26.07	0.927	159.186	12357	1.199	0.834	0.963
511	KIZ_KAN623-2_4.tif:0008-0271	1.765	95.533	0	526	58.32	30.766	0.907	168.603	13088	1.289	0.776	0.961
512	KIZ_KAN623-2_4.tif:0009-0274	0.721	66.625	0	208	143.01	31.156	0.92	48.064	3731	1.143	0.875	1
513	KIZ_KAN623-2_4.tif:0010-0406	2.087	160	0	1105	68.242	46.122	0.749	333.908	25920	1.411	0.709	0.873
514	KIZ_KAN623-2_4.tif:0011-0411	2.087	128.191	0	1050	30.861	46.75	0.9	267.526	20767	1.072	0.933	0.953
515	KIZ_KAN623-2_4.tif:0012-0432	1.623	104.817	0	532	79.149	49.039	0.928	170.136	13207	1.123	0.89	0.981
516	KIZ_KAN623-2_4.tif:0013-0458	2.267	176.648	0	802	100.806	51.978	0.922	400.509	31090	1.14	0.877	0.957
517	KIZ_KAN623-2_4.tif:0014-0471	1.378	88.561	0	276	88.543	53.521	0.908	122.072	9476	1.097	0.911	0.986
518	KIZ_KAN623-2_4.tif:0015-0476	0.824	49.312	0	167	130.752	54.026	0.914	40.656	3156	1	1	1
519	KIZ_KAN623-2_4.tif:0016-0631	0.928	5.5	0	24	79.223	71.675	0.903	5.101	396	1.125	0.889	1
520	KIZ_KAN623-2_4.tif:0017-0677	2.409	213.048	0	1654	18.583	76.822	0.926	513.229	39840	1.181	0.846	0.959
521	KIZ_KAN623-2_4.tif:0018-0682	2.332	139.829	0	1226	52.999	77.377	0.844	326.037	25309	1.388	0.72	0.971
522	KIZ_KAN623-2_4.tif:0019-0788	2.28	149.525	0	1355	118.781	89.51	0.927	340.942	26466	1.257	0.795	0.97
523	KIZ_KAN623-2_4.tif:0020-0845	2.37	161.136	0	1002	81.61	95.953	0.911	381.946	29649	1.256	0.796	0.956
524	KIZ_KAN623-2_4.tif:0021-0899	2.448	150.716	0	1422	139.816	102.05	0.859	368.896	28636	1.455	0.687	0.969
525	KIZ_KAN623-2_4.tif:0022-0910	1.7	159.735	0	919	9.647	103.277	0.884	271.622	21085	1.139	0.878	0.96
526	KIZ_KAN623-2_4.tif:0023-1004	1.597	189.661	0	1483	23.022	113.988	0.913	302.965	23518	1.083	0.923	0.973
527	KIZ_KAN623-2_4.tif:0024-1034	1.739	208.526	0	1447	88.841	117.384	0.904	362.648	28151	1.069	0.936	0.971
528	KIZ_KAN623-2_4.tif:0025-1036	2.074	114.323	0	1111	27.548	117.581	0.761	237.111	18406	1.452	0.689	0.87
529	KIZ_KAN623-2_4.tif:0026-1071	1.778	160.674	0	1157	50.48	121.581	0.867	285.638	22173	1.241	0.806	0.945
530	KIZ_KAN623-2_4.tif:0027-1073	1.404	150.257	0	576	125.398	121.871	0.836	210.986	16378	1.501	0.666	0.965
531	KIZ_KAN623-2_4.tif:0028-1129	1.494	179.353	0	1275	104.173	128.126	0.889	268.015	20805	1.215	0.823	0.983
532	KIZ_KAN623-2_4.tif:0029-1221	1.945	125.808	0	933	19.135	138.64	0.891	244.724	18997	1.424	0.702	0.959
										23273.4
533	KIZ_KAN623-3_1.tif:0001-0019	1.636	53.953	0	285	31.898	2.137	0.924	88.269	6852	1.185	0.844	0.951
534	KIZ_KAN623-3_1.tif:0002-0094	1.121	15.264	0	108	55.826	10.711	0.919	17.108	1328	1.137	0.88	0.989
535	KIZ_KAN623-3_1.tif:0003-0137	1.61	35.6	0	210	87.948	15.617	0.947	57.326	4450	1.097	0.912	0.977
536	KIZ_KAN623-3_1.tif:0004-0229	1.237	55.885	0	194	88.374	26.053	0.906	69.113	5365	1.229	0.814	0.985
537	KIZ_KAN623-3_1.tif:0005-0258	1.43	30.261	0	134	27.41	29.333	0.959	43.271	3359	1.079	0.927	0.965
538	KIZ_KAN623-3_1.tif:0006-0277	1.572	24.32	0	105	68.9	31.48	0.898	38.222	2967	1.131	0.884	0.964
539	KIZ_KAN623-3_1.tif:0007-0318	1.443	26.304	0	124	104.812	36.146	0.967	37.951	2946	1.061	0.943	0.97
540	KIZ_KAN623-3_1.tif:0008-0381	1.7	48.045	0	171	115.124	43.296	0.961	81.699	6342	1.194	0.837	0.967
541	KIZ_KAN623-3_1.tif:0009-0427	1.597	22.234	0	93	56.051	48.54	0.939	35.516	2757	1.096	0.912	0.973
542	KIZ_KAN623-3_1.tif:0010-0444	1.456	29.469	0	138	89.696	50.467	0.947	42.898	3330	1.116	0.896	0.978
543	KIZ_KAN623-3_1.tif:0011-0447	1.456	32.876	0	131	113.434	50.799	0.947	47.858	3715	1.077	0.929	0.97
544	KIZ_KAN623-3_1.tif:0012-0459	1.533	13.37	0	55	67.034	52.099	0.928	20.496	1591	1.223	0.818	0.96
545	KIZ_KAN623-3_1.tif:0013-0476	1.752	28.566	0	209	19.206	54.094	0.877	50.048	3885	1.317	0.759	0.944
546	KIZ_KAN623-3_1.tif:0014-0555	1.031	39.975	0	164	10.391	63.044	0.919	41.197	3198	1.031	0.97	0.994
547	KIZ_KAN623-3_1.tif:0015-0562	1.378	35.692	0	209	34.045	63.849	0.936	49.197	3819	1.102	0.907	0.986
548	KIZ_KAN623-3_1.tif:0016-0621	1.043	33.025	0	247	108.563	70.54	0.899	34.46	2675	1	1	1
549	KIZ_KAN623-3_1.tif:0017-0628	1.301	31.465	0	159	11.411	71.283	0.972	40.94	3178	1.123	0.89	0.967
550	KIZ_KAN623-3_1.tif:0018-0654	1.211	63.16	0	367	63.64	74.3	0.887	76.482	5937	1.257	0.796	0.974
551	KIZ_KAN623-3_1.tif:0019-0701	1.211	30.84	0	136	8.633	79.574	0.917	37.346	2899	1.147	0.872	0.974
552	KIZ_KAN623-3_1.tif:0020-0781	1.031	142.213	0	564	89.665	88.644	0.887	146.561	11377	1.25	0.8	1
553	KIZ_KAN623-3_1.tif:0021-0832	1.61	17.944	0	164	118.529	94.435	0.92	28.895	2243	1.117	0.895	0.977
554	KIZ_KAN623-3_1.tif:0022-0846	1.198	63.946	0	170	59.592	96.007	0.937	76.611	5947	1.12	0.893	0.969
555	KIZ_KAN623-3_1.tif:0023-0934	0.631	30.571	0	115	12.201	106.066	0.935	19.298	1498	1	1	1
556	KIZ_KAN623-3_1.tif:0024-1008	0.992	29.065	0	138	78.3	114.403	0.917	28.83	2238	1.259	0.794	0.981
557	KIZ_KAN623-3_1.tif:0025-1196	0.721	27.5	0	66	115.089	135.803	0.92	19.839	1540	1.143	0.875	1
558	KIZ_KAN623-3_1.tif:0026-1198	1.031	41.075	0	188	53.964	136.035	0.919	42.331	3286	1.031	0.97	0.994
559	KIZ_KAN623-3_2.tif:0001-0104	1.585	31.407	0	141	38.183	11.81	0.932	49.764	3863	1.16	0.862	0.969
560	KIZ_KAN623-3_2.tif:0002-0110	1.185	28.076	0	144	93.557	12.537	0.927	33.275	2583	1.253	0.798	0.963
561	KIZ_KAN623-3_2.tif:0003-0214	1.288	14.33	0	56	103.059	24.347	0.962	18.46	1433	1.171	0.854	0.957
562	KIZ_KAN623-3_2.tif:0004-0218	1.494	32.957	0	180	121.84	24.814	0.943	49.249	3823	1.057	0.946	0.979
563	KIZ_KAN623-3_2.tif:0005-0301	1.34	41.144	0	188	20.931	34.18	0.939	55.123	4279	1.125	0.889	0.977
564	KIZ_KAN623-3_2.tif:0006-0305	1.791	18.496	0	105	53.568	34.614	0.931	33.12	2571	1.016	0.984	0.982
565	KIZ_KAN623-3_2.tif:0007-0391	1.597	48.371	0	264	74.935	44.442	0.863	77.268	5998	1.329	0.753	0.976
566	KIZ_KAN623-3_2.tif:0008-0395	1.082	38.155	0	181	124.681	44.835	0.919	41.288	3205	1.213	0.825	0.971
567	KIZ_KAN623-3_2.tif:0009-0420	0.992	40.857	0	204	142.169	47.716	0.951	40.528	3146	1.123	0.89	0.981
568	KIZ_KAN623-3_2.tif:0010-0536	1.327	42.942	0	157	9.555	60.925	0.901	56.978	4423	1.146	0.872	0.967
569	KIZ_KAN623-3_2.tif:0011-0549	1.224	21.453	0	72	125.185	62.298	0.926	26.254	2038	1.029	0.972	0.974
570	KIZ_KAN623-3_2.tif:0012-0594	1.868	46.434	0	201	83.15	67.423	0.96	86.736	6733	1.099	0.91	0.973
571	KIZ_KAN623-3_2.tif:0013-0624	1.7	45.53	0	309	141.169	70.838	0.934	77.422	6010	1.028	0.972	0.96
572	KIZ_KAN623-3_2.tif:0014-0646	1.237	30.51	0	127	52.735	73.392	0.878	37.732	2929	1.249	0.8	0.985
573	KIZ_KAN623-3_2.tif:0015-0760	1.597	26.226	0	140	123.772	86.268	0.939	41.893	3252	1.151	0.869	0.976
574	KIZ_KAN623-3_2.tif:0016-0800	1.61	32.16	0	190	22.752	90.769	0.92	51.787	4020	1.094	0.914	0.98
575	KIZ_KAN623-3_2.tif:0017-0828	1.559	14.95	0	87	57.824	93.982	0.944	23.304	1809	1.131	0.884	0.957
576	KIZ_KAN623-3_2.tif:0018-0855	1.481	27.087	0	111	121.118	97.045	0.908	40.128	3115	1.221	0.819	0.979
577	KIZ_KAN623-3_2.tif:0019-0953	0.992	37.792	0	124	78.991	108.15	0.917	37.487	2910	1.259	0.794	0.981
578	KIZ_KAN623-3_2.tif:0020-0989	1.069	21.867	0	72	127.177	112.308	0.836	23.381	1815	1.532	0.653	0.912
579	KIZ_KAN623-3_2.tif:0021-1173	0.812	12.016	0	51	130.531	133.142	0.937	9.752	757	1.039	0.963	0.992
580	KIZ_KAN623-3_2.tif:0022-1221	0.631	27.98	0	77	58.396	138.64	0.935	17.662	1371	1	1	1
581	KIZ_KAN623-3_3.tif:0001-0008	1.353	57.981	0	268	113.325	0.903	0.948	78.427	6088	1.106	0.904	0.977
582	KIZ_KAN623-3_3.tif:0002-0034	1.353	33.248	0	192	134.143	3.86	0.88	44.972	3491	1.371	0.729	0.933
583	KIZ_KAN623-3_3.tif:0003-0148	1.481	39.826	0	150	73.49	16.854	0.935	59.001	4580	1.038	0.964	0.975
584	KIZ_KAN623-3_3.tif:0004-0213	1.739	63.378	0	359	27.643	24.205	0.904	110.221	8556	1.193	0.838	0.975
585	KIZ_KAN623-3_3.tif:0005-0314	1.688	19.252	0	77	76.98	35.628	0.927	32.489	2522	1.15	0.869	0.963
586	KIZ_KAN623-3_3.tif:0006-0315	1.366	40.245	0	142	92.798	35.797	0.916	54.956	4266	1.177	0.85	0.938
587	KIZ_KAN623-3_3.tif:0007-0389	1.688	25.664	0	132	114.678	44.216	0.953	43.31	3362	1.203	0.831	0.97
588	KIZ_KAN623-3_3.tif:0008-0419	1.018	25.253	0	106	141.137	47.602	0.941	25.7	1995	1.001	0.999	0.988
589	KIZ_KAN623-3_3.tif:0009-0432	1.932	31.773	0	142	54.875	49.066	0.957	61.397	4766	1.094	0.914	0.955
590	KIZ_KAN623-3_3.tif:0010-0569	0.902	52.343	0	171	121.797	64.627	0.911	47.201	3664	1.149	0.87	0.986
591	KIZ_KAN623-3_3.tif:0011-0598	1.469	29.395	0	111	18.999	67.935	0.955	43.168	3351	1.099	0.91	0.974
592	KIZ_KAN623-3_3.tif:0012-0605	1.018	25.62	0	86	38.545	68.724	0.941	26.074	2024	1.001	0.999	0.988
593	KIZ_KAN623-3_3.tif:0013-0616	1.984	9.403	0	48	4.75	69.957	0.909	18.654	1448	1.22	0.82	0.975
594	KIZ_KAN623-3_3.tif:0014-0621	1.842	29.853	0	143	86.271	70.534	0.898	54.994	4269	1.278	0.783	0.966
595	KIZ_KAN623-3_3.tif:0015-0730	1.752	81.176	0	392	117.32	82.918	0.911	142.22	11040	1.171	0.854	0.978
596	KIZ_KAN623-3_3.tif:0016-0752	1.353	21.571	0	117	58.627	85.347	0.891	29.178	2265	1.347	0.742	0.986
597	KIZ_KAN623-3_3.tif:0017-0781	0.631	95.878	0	440	144.542	88.7	0.935	60.521	4698	1	1	1
598	KIZ_KAN623-3_3.tif:0018-0821	1.25	14.918	0	50	133.76	93.24	0.916	18.641	1447	1.229	0.814	0.99
599	KIZ_KAN623-3_3.tif:0019-0877	1.34	35.529	0	252	41.381	99.557	0.939	47.6	3695	1.094	0.914	0.977
600	KIZ_KAN623-3_3.tif:0020-0977	1.675	29.108	0	162	117.312	110.934	0.946	48.746	3784	1.196	0.836	0.967
601	KIZ_KAN623-3_3.tif:0021-1036	1.378	23.112	0	71	119.697	117.576	0.896	31.858	2473	1.265	0.79	0.943
602	KIZ_KAN623-3_3.tif:0022-1040	1.224	23.611	0	74	58.108	118.065	0.926	28.895	2243	1.023	0.978	0.979
603	KIZ_KAN623-3_3.tif:0023-1137	1.018	10.911	0	51	115.486	129.095	0.941	11.105	862	1.001	0.999	0.988
604	KIZ_KAN623-3_4.tif:0001-0036	1.353	32.819	0	93	142.041	4.108	0.919	44.392	3446	1.098	0.911	0.981
605	KIZ_KAN623-3_4.tif:0002-0060	1.855	17.847	0	75	73.433	6.823	0.895	33.107	2570	1.359	0.736	0.944
606	KIZ_KAN623-3_4.tif:0003-0074	1.366	52.406	0	254	106.426	8.429	0.916	71.561	5555	1.26	0.793	0.942
607	KIZ_KAN623-3_4.tif:0004-0100	1.945	29.768	0	192	43.407	11.398	0.963	57.906	4495	1.026	0.974	0.956
608	KIZ_KAN623-3_4.tif:0005-0171	0.786	20.525	0	110	144.62	19.456	0.857	16.129	1252	1.822	0.549	0.968
609	KIZ_KAN623-3_4.tif:0006-0193	1.353	32.314	0	132	11.062	21.889	0.891	43.709	3393	1.336	0.749	0.986
610	KIZ_KAN623-3_4.tif:0007-0212	1.855	38.174	0	215	52.729	24.079	0.98	70.814	5497	1.1	0.909	0.97
611	KIZ_KAN623-3_4.tif:0008-0294	1.61	21.528	0	106	90.465	33.368	0.91	34.666	2691	1.337	0.748	0.951
612	KIZ_KAN623-3_4.tif:0009-0365	1.469	69.64	0	264	18.131	41.435	0.927	102.272	7939	1.21	0.826	0.979
613	KIZ_KAN623-3_4.tif:0010-0433	1.43	37.315	0	196	58.988	49.186	0.902	53.358	4142	1.009	0.991	0.961
614	KIZ_KAN623-3_4.tif:0011-0440	1.572	17.123	0	86	124.558	49.958	0.951	26.911	2089	1.123	0.89	0.972
615	KIZ_KAN623-3_4.tif:0012-0467	0.631	46.918	0	160	140.002	53.061	0.935	29.616	2299	1	1	1
616	KIZ_KAN623-3_4.tif:0013-0528	1.134	14.114	0	56	24.005	59.928	0.93	16	1242	1.126	0.888	0.989
617	KIZ_KAN623-3_4.tif:0014-0596	2.138	18.518	0	107	85.963	67.71	0.922	39.6	3074	1.088	0.919	0.965
618	KIZ_KAN623-3_4.tif:0015-0615	1.159	176.044	0	948	66.511	69.859	0.89	204.106	15844	1.111	0.9	1
619	KIZ_KAN623-3_4.tif:0016-0616	0.721	33.643	0	136	1.703	69.973	0.92	24.27	1884	1.143	0.875	1
620	KIZ_KAN623-3_4.tif:0017-0737	1.778	36.5	0	177	5.371	83.69	0.857	64.888	5037	1.57	0.637	0.936
621	KIZ_KAN623-3_4.tif:0018-0760	1.237	22.615	0	110	35.628	86.259	0.936	27.967	2171	1.049	0.953	0.98
622	KIZ_KAN623-3_4.tif:0019-0801	1.108	37.407	0	119	112.989	90.904	0.909	41.442	3217	1.373	0.728	0.989
623	KIZ_KAN623-3_4.tif:0020-0808	1.43	23.622	0	96	92.13	91.758	0.93	33.777	2622	1.038	0.963	0.961
624	KIZ_KAN623-3_4.tif:0021-0966	1.353	36.429	0	153	72.767	109.693	0.948	49.275	3825	1.122	0.892	0.981
625	KIZ_KAN623-3_4.tif:0022-1050	1.469	11.421	0	89	108.663	119.228	0.985	16.773	1302	1.02	0.981	0.974
626	KIZ_KAN623-3_4.tif:0023-1090	1.25	14.124	0	90	144.253	123.7	0.916	17.649	1370	1.022	0.979	0.985
627	KIZ_KAN623-3_4.tif:0024-1187	1.147	17.978	0	85	37.857	134.719	0.909	20.612	1600	1.115	0.897	0.994
										3644.74
628	KIZ_KAN623-4_1.tif:0001-0044	1.224	27.4	0	126	75.299	5.062	0.926	33.533	2603	1.246	0.802	0.984
629	KIZ_KAN623-4_1.tif:0002-0195	1.61	17.52	0	123	29.969	22.168	0.947	28.212	2190	1.094	0.914	0.98
630	KIZ_KAN623-4_1.tif:0003-0271	1.881	18.87	0	115	14.568	30.772	0.942	35.491	2755	1.126	0.888	0.977
631	KIZ_KAN623-4_1.tif:0004-0273	1.816	16.759	0	108	139.393	31.046	0.934	30.441	2363	1.129	0.886	0.962
632	KIZ_KAN623-4_1.tif:0005-0298	1.778	16.681	0	65	118.88	33.884	0.924	29.655	2302	1.189	0.841	0.986
633	KIZ_KAN623-4_1.tif:0006-0411	1.494	31.207	0	119	93.411	46.632	0.889	46.634	3620	1.199	0.834	0.983
634	KIZ_KAN623-4_1.tif:0007-0471	0.966	16.373	0	73	144.55	53.5	0.862	15.819	1228	1.558	0.642	0.987
635	KIZ_KAN623-4_1.tif:0008-0569	1.301	20.198	0	86	6.284	64.617	0.821	26.28	2040	1.639	0.61	0.927
636	KIZ_KAN623-4_1.tif:0009-0587	1.829	22.683	0	112	95.629	66.595	0.941	41.494	3221	1.097	0.912	0.963
637	KIZ_KAN623-4_1.tif:0010-0673	1.327	15.252	0	96	60.842	76.465	0.93	20.238	1571	1.114	0.897	0.972
638	KIZ_KAN623-4_1.tif:0011-0821	1.533	19.134	0	98	13.956	93.178	0.887	29.333	2277	1.201	0.833	0.996
639	KIZ_KAN623-4_1.tif:0012-0835	1.366	17.443	0	77	74.55	94.822	0.899	23.819	1849	1.121	0.892	0.981
640	KIZ_KAN623-4_1.tif:0013-0912	1.713	23.248	0	143	125.181	103.524	0.968	39.832	3092	1.023	0.977	0.967
641	KIZ_KAN623-4_1.tif:0014-0931	1.469	11.886	0	40	43.29	105.72	0.9	17.455	1355	1.092	0.915	0.97
642	KIZ_KAN623-4_1.tif:0015-0965	1.005	17.436	0	64	19.913	109.578	0.963	17.52	1360	1.032	0.969	0.981
643	KIZ_KAN623-4_1.tif:0016-0989	1.881	14.938	0	112	94.846	112.266	0.931	28.096	2181	1.202	0.832	0.945
644	KIZ_KAN623-4_1.tif:0017-1168	0.631	12.837	0	57	27.07	132.625	0.935	8.103	629	1	1	1
645	KIZ_KAN623-4_1.tif:0018-1198	0.631	10.551	0	35	103.909	136.03	0.935	6.66	517	1	1	1
646	KIZ_KAN623-4_1.tif:0019-1214	1.353	11.419	0	38	60.954	137.833	0.919	15.446	1199	1.13	0.885	0.977
647	KIZ_KAN623-4_2.tif:0001-0015	1.494	26.25	0	128	60.707	1.744	0.905	39.226	3045	1.177	0.85	0.939
648	KIZ_KAN623-4_2.tif:0002-0045	1.366	25.858	0	126	98.565	5.108	0.957	35.31	2741	1.114	0.898	0.981
649	KIZ_KAN623-4_2.tif:0003-0248	1.288	26.15	0	141	125.414	28.214	0.875	33.687	2615	1.404	0.712	0.962
650	KIZ_KAN623-4_2.tif:0004-0286	0.812	54.714	0	191	72.987	32.455	0.937	44.405	3447	1.039	0.963	0.992
651	KIZ_KAN623-4_2.tif:0005-0379	1.108	13.151	0	47	104.998	43.073	0.94	14.57	1131	1.129	0.886	0.977
652	KIZ_KAN623-4_2.tif:0006-0470	0.915	14.803	0	92	81.941	53.408	0.924	13.539	1051	1.13	0.885	0.993
653	KIZ_KAN623-4_2.tif:0007-0491	1.147	33.27	0	130	7.383	55.79	0.909	38.144	2961	1.115	0.897	0.994
654	KIZ_KAN623-4_2.tif:0008-0500	0.721	23.071	0	89	19.579	56.75	0.92	16.644	1292	1.143	0.875	1
655	KIZ_KAN623-4_2.tif:0009-0521	1.005	9.5	0	39	106.504	59.184	0.929	9.546	741	1.026	0.975	0.981
656	KIZ_KAN623-4_2.tif:0010-0588	1.713	26.872	0	132	132.905	66.733	0.941	46.041	3574	1.046	0.956	0.964
657	KIZ_KAN623-4_2.tif:0011-0615	0.915	22.07	0	76	84.45	69.853	0.924	20.186	1567	1.13	0.885	0.993
658	KIZ_KAN623-4_2.tif:0012-0677	1.61	25.32	0	137	98.967	76.917	0.947	40.772	3165	1.094	0.914	0.98
659	KIZ_KAN623-4_2.tif:0013-0699	1.237	13.677	0	72	14.547	79.337	0.906	16.914	1313	1.009	0.991	0.98
660	KIZ_KAN623-4_2.tif:0014-0835	1.185	12.315	0	51	53.407	94.826	0.927	14.596	1133	1.301	0.769	0.974
661	KIZ_KAN623-4_2.tif:0015-0875	1.494	30.578	0	142	120.628	99.352	0.854	45.693	3547	1.311	0.763	0.947
662	KIZ_KAN623-4_2.tif:0016-1022	0.889	10.609	0	33	129.906	115.991	0.933	9.43	732	1.172	0.853	0.979
663	KIZ_KAN623-4_2.tif:0017-1057	1.005	21.769	0	116	144.208	120.032	0.963	21.874	1698	1.032	0.969	0.981
664	KIZ_KAN623-4_2.tif:0018-1058	0.631	29.143	0	99	54.991	120.14	0.935	18.396	1428	1	1	1
665	KIZ_KAN623-4_2.tif:0019-1098	0.915	10.324	0	50	85.415	124.617	0.924	9.443	733	1.13	0.885	0.993
666	KIZ_KAN623-4_2.tif:0020-1165	0.928	26.306	0	94	102.718	132.284	0.903	24.399	1894	1.125	0.889	1
667	KIZ_KAN623-4_3.tif:0001-0030	0.902	30.071	0	142	58.01	3.45	0.911	27.117	2105	1.149	0.87	0.986
668	KIZ_KAN623-4_3.tif:0002-0042	1.043	11.901	0	83	133.306	4.824	0.899	12.418	964	1	1	1
669	KIZ_KAN623-4_3.tif:0003-0209	1.739	26.089	0	121	104.424	23.772	0.894	45.371	3522	1.173	0.853	0.938
670	KIZ_KAN623-4_3.tif:0004-0215	1.726	15.075	0	112	82.719	24.403	0.975	26.022	2020	1.011	0.99	0.971
671	KIZ_KAN623-4_3.tif:0005-0269	1.095	32.388	0	98	41.243	30.536	0.962	35.465	2753	1.139	0.878	0.977
672	KIZ_KAN623-4_3.tif:0006-0292	1.52	18.102	0	99	135.94	33.12	0.92	27.516	2136	1.1	0.909	0.952
673	KIZ_KAN623-4_3.tif:0007-0423	1.481	18.513	0	79	8.114	48.074	0.908	27.426	2129	1.077	0.929	0.975
674	KIZ_KAN623-4_3.tif:0008-0477	1.688	17.206	0	114	61.921	54.189	0.877	29.037	2254	1.259	0.794	0.96
675	KIZ_KAN623-4_3.tif:0009-0535	1.726	12.037	0	81	96.179	60.795	0.922	20.779	1613	1.196	0.836	0.975
676	KIZ_KAN623-4_3.tif:0010-0562	1.443	17.179	0	107	39.262	63.803	0.911	24.785	1924	1.245	0.803	0.97
677	KIZ_KAN623-4_3.tif:0011-0609	1.018	6.228	0	29	18.217	69.19	0.941	6.338	492	1.001	0.999	0.988
678	KIZ_KAN623-4_3.tif:0012-0626	1.108	16.372	0	65	139.105	71.05	0.94	18.138	1408	1.13	0.885	0.977
679	KIZ_KAN623-4_3.tif:0013-0710	2.19	30.182	0	190	101.577	80.549	0.913	66.099	5131	1.107	0.904	0.947
680	KIZ_KAN623-4_3.tif:0014-0800	1.443	15.125	0	57	17.068	90.854	0.911	21.823	1694	1.138	0.879	0.966
681	KIZ_KAN623-4_3.tif:0015-0836	1.34	17.25	0	120	63.57	94.944	0.969	23.111	1794	1.131	0.884	0.977
682	KIZ_KAN623-4_3.tif:0016-0963	1.288	13.67	0	62	132.341	109.357	0.962	17.61	1367	1.117	0.895	0.962
683	KIZ_KAN623-4_3.tif:0017-1003	1.61	13.968	0	61	90.526	113.864	0.92	22.492	1746	1.122	0.892	0.977
684	KIZ_KAN623-4_3.tif:0018-1040	1.881	9.349	0	37	15.888	118.075	0.917	17.584	1365	1.279	0.782	0.98
685	KIZ_KAN623-4_3.tif:0019-1116	0.812	20.841	0	76	56.189	126.672	0.937	16.914	1313	1.039	0.963	0.992
686	KIZ_KAN623-4_3.tif:0020-1169	0.631	19.469	0	97	119.913	132.738	0.935	12.29	954	1	1	1
687	KIZ_KAN623-4_4.tif:0001-0073	1.61	21.792	0	164	109.533	8.33	0.947	35.091	2724	1.096	0.913	0.977
688	KIZ_KAN623-4_4.tif:0002-0114	1.804	13.257	0	76	42.661	13.024	0.953	23.909	1856	1.154	0.867	0.966
689	KIZ_KAN623-4_4.tif:0003-0136	1.314	17.49	0	59	69.849	15.418	0.95	22.982	1784	1.112	0.899	0.962
690	KIZ_KAN623-4_4.tif:0004-0156	0.915	11.254	0	70	82.691	17.7	0.924	10.293	799	1.13	0.885	0.993
691	KIZ_KAN623-4_4.tif:0005-0287	1.919	14.074	0	94	59.567	32.601	0.858	27.014	2097	1.285	0.778	0.949
692	KIZ_KAN623-4_4.tif:0006-0288	0.824	32.031	0	115	121.218	32.688	0.914	26.409	2050	1	1	1
693	KIZ_KAN623-4_4.tif:0007-0301	1.829	19.979	0	107	95.227	34.227	0.941	36.547	2837	1.092	0.916	0.963
694	KIZ_KAN623-4_4.tif:0008-0343	1.713	21.368	0	190	63.323	38.957	0.881	36.611	2842	1.212	0.825	0.924
695	KIZ_KAN623-4_4.tif:0009-0376	1.121	85.46	0	433	48.119	42.748	0.951	95.78	7435	1.121	0.892	0.983
696	KIZ_KAN623-4_4.tif:0010-0418	0.631	29.98	0	79	23.778	47.5	0.935	18.924	1469	1	1	1
697	KIZ_KAN623-4_4.tif:0011-0527	0.631	21.061	0	94	12.428	59.871	0.935	13.294	1032	1	1	1
698	KIZ_KAN623-4_4.tif:0012-0537	1.572	14.361	0	78	91.805	60.99	0.951	22.57	1752	1.108	0.902	0.964
699	KIZ_KAN623-4_4.tif:0013-0591	1.649	12.891	0	77	62.651	67.118	0.891	21.256	1650	1.091	0.916	0.985
700	KIZ_KAN623-4_4.tif:0014-0631	0.631	17.245	0	99	100.958	71.675	0.935	10.886	845	1	1	1
701	KIZ_KAN623-4_4.tif:0015-0700	1.469	15.711	0	98	46.772	79.443	0.9	23.072	1791	1.225	0.816	0.979
702	KIZ_KAN623-4_4.tif:0016-0741	1.056	34.329	0	116	106.405	84.105	0.928	36.264	2815	1.26	0.793	0.959
703	KIZ_KAN623-4_4.tif:0017-0745	1.159	18.278	0	113	141.932	84.558	0.89	21.191	1645	1.111	0.9	1
704	KIZ_KAN623-4_4.tif:0018-0839	1.533	18.244	0	83	130.937	95.233	0.956	27.967	2171	1.192	0.839	0.964
705	KIZ_KAN623-4_4.tif:0019-0898	1.546	33.283	0	147	85.871	101.914	0.883	51.452	3994	1.336	0.749	0.96
706	KIZ_KAN623-4_4.tif:0020-0985	0.631	10.429	0	48	103.682	111.854	0.935	6.583	511	1	1	1
707	KIZ_KAN623-4_4.tif:0021-1098	1.108	13.826	0	108	65.5	124.671	0.94	15.317	1189	1.16	0.862	0.983
708	KIZ_KAN623-4_4.tif:0022-1203	1.469	7.956	0	61	128.281	136.563	0.874	11.684	907	1.257	0.795	0.979
										2012.83
709	KIZ_KAN623-5_1.tif:0001-0177	1.958	188.316	0	1454	117.083	20.161	0.944	368.742	28624	1.121	0.892	0.953
710	KIZ_KAN623-5_1.tif:0002-0289	1.894	192.313	0	1594	72.734	32.893	0.877	364.181	28270	1.115	0.897	0.974
711	KIZ_KAN623-5_1.tif:0003-0327	2.37	161.571	0	1204	20.566	37.158	0.932	382.976	29729	1.221	0.819	0.958
712	KIZ_KAN623-5_1.tif:0004-0446	1.894	198.354	0	1379	97.591	50.665	0.923	375.621	29158	1.088	0.919	0.974
713	KIZ_KAN623-5_1.tif:0005-0466	1.919	234.282	0	1226	17.482	52.951	0.912	449.694	34908	1.122	0.891	0.98
714	KIZ_KAN623-5_1.tif:0006-0547	2.023	160.248	0	1233	134.16	62.101	0.904	324.105	25159	1.2	0.833	0.972
715	KIZ_KAN623-5_1.tif:0007-0556	1.713	187.534	0	1080	136.302	63.11	0.941	321.309	24942	1.155	0.866	0.974
716	KIZ_KAN623-5_1.tif:0008-0614	1.546	187	0	922	94.03	69.75	0.894	289.078	22440	1.021	0.979	0.996
717	KIZ_KAN623-5_1.tif:0009-0675	2.383	214.595	0	1828	69.272	76.553	0.875	511.425	39700	1.285	0.778	0.949
718	KIZ_KAN623-5_1.tif:0010-0765	1.778	171.674	0	811	80.289	86.896	0.924	305.193	23691	1.209	0.827	0.986
719	KIZ_KAN623-5_1.tif:0011-0783	1.108	131.058	0	451	107.816	88.915	0.879	145.196	11271	1.386	0.722	0.989
720	KIZ_KAN623-5_1.tif:0012-0802	0.631	242.347	74	448	32.177	91.084	0.935	152.977	11875	1	1	1
721	KIZ_KAN623-5_1.tif:0013-0880	1.791	192.496	0	854	126.337	99.858	0.906	344.69	26757	1.046	0.956	0.986
722	KIZ_KAN623-5_1.tif:0014-0937	1.894	170.449	0	926	103.449	106.344	0.923	322.778	25056	1.14	0.877	0.977
723	KIZ_KAN623-5_1.tif:0015-0942	1.7	179.28	0	1002	123.816	106.914	0.909	304.858	23665	1.09	0.918	0.96
724	KIZ_KAN623-5_1.tif:0016-0961	1.481	138.678	0	1150	144.388	109.09	0.882	205.446	15948	1.178	0.849	0.979
725	KIZ_KAN623-5_1.tif:0017-0964	1.262	209.378	0	972	2.497	109.414	0.925	264.331	20519	1.052	0.95	0.99
726	KIZ_KAN623-5_1.tif:0018-0981	2.035	158.886	0	1368	74.322	111.389	0.878	323.396	25104	1.205	0.83	0.935
727	KIZ_KAN623-5_1.tif:0019-1035	1.804	157.507	0	850	14.571	117.525	0.889	284.067	22051	1.185	0.844	0.989
728	KIZ_KAN623-5_1.tif:0020-1094	0.812	71.952	0	425	140.507	124.175	0.937	58.395	4533	1.039	0.963	0.992
729	KIZ_KAN623-5_1.tif:0021-1174	1.675	172.4	0	994	55.5	133.301	0.871	288.717	22412	1.194	0.838	0.956
730	KIZ_KAN623-5_2.tif:0001-0020	2.151	158.635	0	855	123.223	2.247	0.905	341.277	26492	1.273	0.786	0.971
731	KIZ_KAN623-5_2.tif:0002-0096	1.043	199.852	0	738	70.313	10.953	0.899	208.538	16188	1	1	1
732	KIZ_KAN623-5_2.tif:0003-0120	1.288	192.15	0	1161	5.902	13.62	0.886	247.532	19215	1	1	1
733	KIZ_KAN623-5_2.tif:0004-0212	2.177	150.68	0	1187	78.589	24.159	0.886	328.047	25465	1.323	0.756	0.944
734	KIZ_KAN623-5_2.tif:0005-0239	0.631	16.041	0	70	36.831	27.183	0.935	10.125	786	1	1	1
735	KIZ_KAN623-5_2.tif:0006-0253	1.713	131.368	0	592	128.069	28.762	0.835	225.079	17472	1.284	0.779	0.924
736	KIZ_KAN623-5_2.tif:0007-0257	2.19	143.871	0	794	44.484	29.218	0.804	315.074	24458	1.407	0.711	0.907
737	KIZ_KAN623-5_2.tif:0008-0290	1.546	130.342	0	601	134.558	32.916	0.883	201.491	15641	1.408	0.71	0.964
738	KIZ_KAN623-5_2.tif:0009-0416	1.262	193.908	0	1034	5.108	47.216	0.925	244.801	19003	1.052	0.95	0.99
739	KIZ_KAN623-5_2.tif:0010-0433	2.357	135.891	0	1017	71.475	49.202	0.802	320.356	24868	1.555	0.643	0.913
740	KIZ_KAN623-5_2.tif:0011-0560	2.357	188.033	0	1329	105.778	63.562	0.846	443.278	34410	1.461	0.684	0.951
741	KIZ_KAN623-5_2.tif:0012-0631	1.804	161.486	0	979	20.203	71.619	0.844	291.242	22608	1.4	0.714	1
742	KIZ_KAN623-5_2.tif:0013-0730	1.391	243.843	0	1335	88.871	82.912	0.916	339.254	26335	1.112	0.9	0.991
743	KIZ_KAN623-5_2.tif:0014-0803	1.262	199.184	0	1099	51.529	91.141	0.925	251.462	19520	1.052	0.95	0.99
744	KIZ_KAN623-5_2.tif:0015-0815	2.28	194.876	0	1233	126.205	92.518	0.927	444.348	34493	1.219	0.82	0.978
745	KIZ_KAN623-5_2.tif:0016-0909	1.275	176.091	0	769	36.882	103.177	0.905	224.576	17433	1.025	0.975	0.995
746	KIZ_KAN623-5_2.tif:0017-0932	1.958	173.474	0	1375	93.841	105.901	0.749	339.679	26368	1.572	0.636	0.927
747	KIZ_KAN623-5_2.tif:0018-1000	1.984	200.169	0	1394	55.73	113.49	0.886	397.108	30826	1.271	0.787	0.963
748	KIZ_KAN623-5_2.tif:0019-1217	1.018	79.975	0	282	139.435	138.186	0.941	81.39	6318	1.064	0.94	0.988
749	KIZ_KAN623-5_3.tif:0001-0046	1.275	180.253	0	1046	14.471	5.278	0.877	229.884	17845	1.222	0.818	1
750	KIZ_KAN623-5_3.tif:0002-0129	2.448	170.532	0	1092	94.428	14.705	0.941	417.398	32401	1.14	0.877	0.96
751	KIZ_KAN623-5_3.tif:0003-0130	2.113	158.695	0	910	68.601	14.724	0.934	335.273	26026	1.146	0.873	0.959
752	KIZ_KAN623-5_3.tif:0004-0137	1.623	172.159	0	774	37.405	15.54	0.928	279.442	21692	1.085	0.922	0.977
753	KIZ_KAN623-5_3.tif:0005-0171	1.945	150.285	0	566	104.907	19.436	0.914	292.337	22693	1.194	0.838	0.956
754	KIZ_KAN623-5_3.tif:0006-0326	1.752	176.86	0	657	43.504	36.979	0.911	309.857	24053	1.089	0.918	0.982
755	KIZ_KAN623-5_3.tif:0007-0432	1.778	240.659	0	1394	115.875	49.04	0.95	427.832	33211	1.033	0.968	0.982
756	KIZ_KAN623-5_3.tif:0008-0448	2.035	137.456	0	966	19.568	50.894	0.887	279.777	21718	1.38	0.725	0.978
757	KIZ_KAN623-5_3.tif:0009-0633	1.958	118.921	0	926	3.393	71.825	0.853	232.86	18076	1.3	0.769	0.95
758	KIZ_KAN623-5_3.tif:0010-0644	2.422	140.09	0	1218	117.341	73.184	0.842	339.28	26337	1.416	0.706	0.931
759	KIZ_KAN623-5_3.tif:0011-0652	1.597	149.04	0	537	88.387	74.073	0.854	238.077	18481	1.366	0.732	0.929
760	KIZ_KAN623-5_3.tif:0012-0672	1.675	149.323	0	808	84.718	76.301	0.871	250.07	19412	1.265	0.79	0.952
761	KIZ_KAN623-5_3.tif:0013-0773	1.391	188.981	0	1026	26.389	87.726	0.916	262.927	20410	1.1	0.909	0.991
762	KIZ_KAN623-5_3.tif:0014-0861	1.391	240.694	0	1445	67.476	97.724	0.916	334.874	25995	1.112	0.9	0.991
763	KIZ_KAN623-5_3.tif:0015-0953	1.984	154.916	0	973	125.487	108.227	0.932	307.332	23857	1.163	0.86	0.969
764	KIZ_KAN623-5_3.tif:0016-0981	0.812	17.746	0	82	86.481	111.337	0.937	14.402	1118	1.039	0.963	0.992
765	KIZ_KAN623-5_3.tif:0017-0993	1.275	184.737	0	946	138.238	112.7	0.905	235.604	18289	1.025	0.975	0.995
766	KIZ_KAN623-5_3.tif:0018-0996	2.164	159.107	0	1166	69.905	113.02	0.868	344.343	26730	1.28	0.781	0.974
767	KIZ_KAN623-5_3.tif:0019-1084	1.855	145.556	0	687	116.003	123.082	0.881	270.012	20960	1.333	0.75	0.97
768	KIZ_KAN623-5_3.tif:0020-1092	2.035	183.456	0	1921	59.177	124.052	0.816	373.405	28986	1.504	0.665	0.949
769	KIZ_KAN623-5_3.tif:0021-1120	1.275	202.626	0	699	138.073	127.177	0.877	258.418	20060	1.222	0.818	1
770	KIZ_KAN623-5_3.tif:0022-1205	1.262	155.99	0	775	33.71	136.768	0.925	196.931	15287	1.052	0.95	0.99
771	KIZ_KAN623-5_3.tif:0023-1233	1.159	169.889	0	617	78.883	140.002	0.89	196.97	15290	1.111	0.9	1
772	KIZ_KAN623-5_4.tif:0001-0042	1.932	151.827	0	765	108.368	4.744	0.842	293.38	22774	1.307	0.765	0.943
773	KIZ_KAN623-5_4.tif:0002-0062	1.159	174.967	0	510	28.489	7.094	0.89	202.857	15747	1.111	0.9	1
774	KIZ_KAN623-5_4.tif:0003-0099	2.203	211.725	0	1053	11.571	11.239	0.875	466.402	36205	1.499	0.667	0.961
775	KIZ_KAN623-5_4.tif:0004-0112	0.992	62.325	0	419	144.5	12.73	0.917	61.822	4799	1.265	0.791	0.987
776	KIZ_KAN623-5_4.tif:0005-0128	1.134	8.352	0	43	95.454	14.595	0.93	9.468	735	1.111	0.9	0.989
777	KIZ_KAN623-5_4.tif:0006-0198	1.7	160.212	0	1088	1.138	22.5	0.934	272.434	21148	1.098	0.911	0.971
778	KIZ_KAN623-5_4.tif:0007-0256	2.254	189.594	0	1523	61.693	29.078	0.875	427.42	33179	1.548	0.646	0.975
779	KIZ_KAN623-5_4.tif:0008-0477	1.043	170.593	0	518	28.999	54.196	0.899	178.007	13818	1	1	1
780	KIZ_KAN623-5_4.tif:0009-0483	1.623	222.714	0	1388	113.897	54.821	0.928	361.502	28062	1.15	0.869	0.984
781	KIZ_KAN623-5_4.tif:0010-0504	2.293	158.067	0	1130	76.437	57.295	0.823	362.455	28136	1.41	0.709	0.93
782	KIZ_KAN623-5_4.tif:0011-0555	2.254	113.069	0	1010	51.361	63.023	0.835	254.901	19787	1.589	0.629	0.97
783	KIZ_KAN623-5_4.tif:0012-0598	1.404	211.138	0	754	91.59	67.925	0.897	296.472	23014	1.103	0.907	0.995
784	KIZ_KAN623-5_4.tif:0013-0678	2.023	162.567	0	763	96.675	76.989	0.86	328.794	25523	1.402	0.713	0.978
785	KIZ_KAN623-5_4.tif:0014-0686	2.177	152.976	0	1419	8.121	77.867	0.781	333.045	25853	1.417	0.706	0.894
786	KIZ_KAN623-5_4.tif:0015-0702	2.332	159.674	0	1234	124.322	79.716	0.811	372.31	28901	1.412	0.708	0.905
787	KIZ_KAN623-5_4.tif:0016-0920	2.229	112.318	0	894	141.483	104.473	0.865	250.315	19431	1.3	0.769	0.945
788	KIZ_KAN623-5_4.tif:0017-0944	1.597	149.371	0	767	118.219	107.141	0.913	238.605	18522	1.098	0.91	0.969
789	KIZ_KAN623-5_4.tif:0018-0956	1.404	205.743	0	1065	19.697	108.501	0.897	288.897	22426	1.103	0.907	0.995
790	KIZ_KAN623-5_4.tif:0019-1032	2.345	129.577	0	785	113.344	117.186	0.869	303.802	23583	1.543	0.648	0.989
791	KIZ_KAN623-5_4.tif:0020-1208	1.597	137.395	0	1097	36.352	137.12	0.939	219.475	17037	1.095	0.913	0.973
792	KIZ_KAN623-5_4.tif:0021-1241	1.61	158.24	0	741	4.473	140.877	0.947	254.811	19780	1.122	0.892	0.977
										22036.9
793	KIZ_KAN623-6_1.tif:0001-0052	2.692	133.325	0	1342	130.875	5.908	0.826	358.964	27865	1.555	0.643	0.919
794	KIZ_KAN623-6_1.tif:0002-0082	1.894	137.687	0	576	133.105	9.365	0.718	260.737	20240	1.998	0.501	0.883
795	KIZ_KAN623-6_1.tif:0003-0138	1.855	209.285	0	1625	63.26	15.687	0.905	388.232	30137	1.218	0.821	0.966
796	KIZ_KAN623-6_1.tif:0004-0409	1.159	186.678	0	580	122.523	46.422	0.89	216.435	16801	1.111	0.9	1
797	KIZ_KAN623-6_1.tif:0005-0410	1.275	194.374	0	669	67.878	46.53	0.905	247.893	19243	1.025	0.975	0.995
798	KIZ_KAN623-6_1.tif:0006-0503	1.61	202.168	0	1229	19.26	57.094	0.92	325.547	25271	1.106	0.904	0.977
799	KIZ_KAN623-6_1.tif:0007-0545	2.396	127	0	994	128.422	61.842	0.879	304.305	23622	1.218	0.821	0.949
800	KIZ_KAN623-6_1.tif:0008-0570	2.087	183.377	0	1525	121.2	64.771	0.878	382.693	29707	1.297	0.771	0.956
801	KIZ_KAN623-6_1.tif:0009-0681	1.945	130.172	0	699	39.113	77.295	0.762	253.214	19656	1.902	0.526	0.944
802	KIZ_KAN623-6_1.tif:0010-0693	2.525	164.888	0	1529	68.542	78.643	0.815	416.329	32318	1.765	0.567	0.936
803	KIZ_KAN623-6_1.tif:0011-0775	2.177	138.018	0	694	140.768	88.021	0.799	300.479	23325	1.591	0.628	0.911
804	KIZ_KAN623-6_1.tif:0012-0840	1.018	159.127	0	452	12.253	95.346	0.908	161.943	12571	1.252	0.799	0.994
805	KIZ_KAN623-6_1.tif:0013-0886	1.069	59.506	0	307	114.122	100.553	0.908	63.625	4939	1.234	0.81	0.96
806	KIZ_KAN623-6_1.tif:0014-0935	1.907	140.905	0	1089	22.439	106.146	0.906	268.646	20854	1.105	0.905	0.974
807	KIZ_KAN623-6_1.tif:0015-0978	2.164	141.351	0	910	75.702	110.981	0.924	305.915	23747	1.247	0.802	0.944
808	KIZ_KAN623-6_1.tif:0016-0991	1.159	180.2	0	502	85.409	112.479	0.89	208.924	16218	1.111	0.9	1
809	KIZ_KAN623-6_1.tif:0017-1207	2.035	135.146	0	910	94.898	137.04	0.836	275.075	21353	1.59	0.629	0.946
810	KIZ_KAN623-6_1.tif:0018-1243	1.494	185.267	0	1373	50.982	141.088	0.916	276.852	21491	1.201	0.833	0.987
811	KIZ_KAN623-6_1.tif:0019-1268	1.752	147.243	0	1028	11.738	143.94	0.877	257.967	20025	1.404	0.712	0.958
812	KIZ_KAN623-6_2.tif:0001-0096	1.958	169.007	0	1389	66.362	10.942	0.944	330.932	25689	1.041	0.961	0.959
813	KIZ_KAN623-6_2.tif:0002-0143	1.7	201.833	0	1277	55.659	16.282	0.884	343.209	26642	1.295	0.772	0.967
814	KIZ_KAN623-6_2.tif:0003-0162	0.812	41.429	0	93	7.144	18.393	0.937	33.623	2610	1.039	0.963	0.992
815	KIZ_KAN623-6_2.tif:0004-0177	2.448	143.021	0	1072	25.25	20.141	0.832	350.062	27174	1.559	0.641	0.943
816	KIZ_KAN623-6_2.tif:0005-0207	1.842	172.552	0	1189	2.043	23.536	0.922	317.87	24675	1.198	0.835	0.966
817	KIZ_KAN623-6_2.tif:0006-0263	2.19	157.829	0	1149	53.333	29.855	0.87	345.644	26831	1.483	0.674	0.944
818	KIZ_KAN623-6_2.tif:0007-0332	2.074	165.317	0	937	95.335	37.704	0.844	342.874	26616	1.454	0.688	0.931
819	KIZ_KAN623-6_2.tif:0008-0347	1.52	197.695	0	919	43.584	39.393	0.905	300.517	23328	1.2	0.834	0.992
820	KIZ_KAN623-6_2.tif:0009-0354	1.559	59.132	0	169	138.419	40.173	0.972	92.173	7155	1.097	0.912	0.964
821	KIZ_KAN623-6_2.tif:0010-0369	2.126	159.321	0	1381	6.359	41.9	0.873	338.649	26288	1.295	0.772	0.965
822	KIZ_KAN623-6_2.tif:0011-0387	1.288	8.97	0	39	106.446	43.965	0.932	11.555	897	1.257	0.795	0.971
823	KIZ_KAN623-6_2.tif:0012-0440	1.481	186.052	0	846	2.018	49.943	0.908	275.629	21396	1.2	0.833	0.983
824	KIZ_KAN623-6_2.tif:0013-0469	2.267	210.5	0	2095	120.821	53.319	0.901	477.262	37048	1.208	0.828	0.954
825	KIZ_KAN623-6_2.tif:0014-0530	2.242	186.736	0	1526	104.243	60.212	0.912	418.57	32492	1.27	0.787	0.953
826	KIZ_KAN623-6_2.tif:0015-0534	1.224	7.674	0	41	16.051	60.665	0.926	9.391	729	1.233	0.811	0.979
827	KIZ_KAN623-6_2.tif:0016-0568	2.061	190.312	0	1570	25.632	64.452	0.781	392.265	30450	1.39	0.72	0.912
828	KIZ_KAN623-6_2.tif:0017-0582	2.37	172.701	0	1536	75.913	66.077	0.878	409.359	31777	1.375	0.727	0.981
829	KIZ_KAN623-6_2.tif:0018-0603	2.177	152.888	0	1204	143.87	68.422	0.916	332.852	25838	1.168	0.856	0.971
830	KIZ_KAN623-6_2.tif:0019-0711	1.636	222.472	0	1519	128.98	80.694	0.935	363.975	28254	1.108	0.903	0.984
831	KIZ_KAN623-6_2.tif:0020-0723	1.662	248.76	0	1534	78.263	82.065	0.923	413.391	32090	1.093	0.915	0.989
832	KIZ_KAN623-6_2.tif:0021-0738	1.726	120.358	0	498	46.383	83.742	0.842	207.765	16128	1.383	0.723	0.937
833	KIZ_KAN623-6_2.tif:0022-0786	1.043	193.593	0	766	8.002	89.268	0.899	202.007	15681	1	1	1
834	KIZ_KAN623-6_2.tif:0023-0788	1.868	219.028	0	1831	108.657	89.441	0.935	409.127	31759	1.144	0.874	0.97
835	KIZ_KAN623-6_2.tif:0024-0788	2.087	135.198	0	915	127.076	89.459	0.837	282.147	21902	1.408	0.71	0.959
836	KIZ_KAN623-6_2.tif:0025-0809	1.456	10.584	0	43	78.55	91.827	0.947	15.407	1196	1.237	0.808	0.974
837	KIZ_KAN623-6_2.tif:0026-0914	1.881	215.774	0	1772	128.947	103.791	0.894	405.83	31503	1.168	0.856	0.97
838	KIZ_KAN623-6_2.tif:0027-0951	2.164	134.089	0	860	49.936	107.973	0.777	290.198	22527	1.687	0.593	0.923
839	KIZ_KAN623-6_2.tif:0028-0957	1.971	10.967	0	45	124.861	108.61	0.903	21.616	1678	1.218	0.821	0.959
840	KIZ_KAN623-6_2.tif:0029-1014	2.126	165.345	0	1180	114.794	115.067	0.873	351.454	27282	1.457	0.686	0.973
841	KIZ_KAN623-6_2.tif:0030-1090	2.409	173.465	0	1150	90.307	123.726	0.926	417.874	32438	1.195	0.837	0.957
842	KIZ_KAN623-6_2.tif:0031-1175	1.971	124.105	0	817	128.928	133.374	0.926	244.608	18988	1.3	0.769	0.975
843	KIZ_KAN623-6_3.tif:0001-0022	2.422	136.596	0	811	105.631	2.551	0.901	330.816	25680	1.321	0.757	0.938
844	KIZ_KAN623-6_3.tif:0002-0025	1.984	113.058	0	794	50.261	2.919	0.815	224.293	17411	1.674	0.597	0.939
845	KIZ_KAN623-6_3.tif:0003-0089	1.378	210.916	0	1166	141.653	10.154	0.908	290.727	22568	1.127	0.887	0.986
846	KIZ_KAN623-6_3.tif:0004-0104	1.018	5.127	0	21	87.894	11.851	0.908	5.217	405	1.058	0.946	0.988
847	KIZ_KAN623-6_3.tif:0005-0113	0.812	49.667	0	239	20.714	12.882	0.9	40.309	3129	1.286	0.778	1
848	KIZ_KAN623-6_3.tif:0006-0118	0.915	91.592	0	382	83.019	13.399	0.924	83.773	6503	1.13	0.885	0.993
849	KIZ_KAN623-6_3.tif:0007-0214	2.306	134.028	0	1122	66.698	24.365	0.817	309.058	23991	1.6	0.625	0.978
850	KIZ_KAN623-6_3.tif:0008-0228	2.422	162.766	0	1455	38.893	25.857	0.824	394.197	30600	1.54	0.649	0.938
851	KIZ_KAN623-6_3.tif:0009-0326	1.134	81.284	0	224	76.487	37.058	0.93	92.147	7153	1.11	0.901	0.989
852	KIZ_KAN623-6_3.tif:0010-0357	2.293	135.579	0	1088	119.125	40.52	0.842	310.887	24133	1.569	0.637	0.934
853	KIZ_KAN623-6_3.tif:0011-0432	2.538	127.746	0	1244	86.188	49.132	0.802	324.195	25166	1.602	0.624	0.923
854	KIZ_KAN623-6_3.tif:0012-0439	1.275	191.485	0	882	1.305	49.883	0.877	244.209	18957	1.222	0.818	1
855	KIZ_KAN623-6_3.tif:0013-0481	1.752	164.081	0	1014	62.331	54.586	0.864	287.467	22315	1.409	0.71	0.986
856	KIZ_KAN623-6_3.tif:0014-0595	1.275	163.172	0	542	46.303	67.538	0.905	208.1	16154	1.025	0.975	0.995
857	KIZ_KAN623-6_3.tif:0015-0737	2.048	170.956	0	1174	116.359	83.695	0.862	350.165	27182	1.336	0.749	0.944
858	KIZ_KAN623-6_3.tif:0016-0742	2.409	130.316	0	1052	44.212	84.266	0.819	313.928	24369	1.559	0.641	0.923
859	KIZ_KAN623-6_3.tif:0017-0756	1.881	121.788	0	789	60.841	85.861	0.773	229.059	17781	1.794	0.557	0.915
860	KIZ_KAN623-6_3.tif:0018-0781	1.52	214.814	0	1138	130.01	88.695	0.905	326.539	25348	1.063	0.941	0.987
861	KIZ_KAN623-6_3.tif:0019-0783	1.404	194.55	0	856	39.607	88.932	0.897	273.181	21206	1.103	0.907	0.995
862	KIZ_KAN623-6_3.tif:0020-1005	1.623	120	0	518	81.516	114.123	0.791	194.78	15120	1.583	0.632	0.9
863	KIZ_KAN623-6_3.tif:0021-1042	1.868	182.366	0	920	50.871	118.344	0.887	340.645	26443	1.271	0.787	0.973
864	KIZ_KAN623-6_3.tif:0022-1272	0.721	7.5	0	63	142.045	144.372	0.92	5.411	420	1.143	0.875	1
865	KIZ_KAN623-6_4.tif:0001-0103	2.28	196.475	0	1188	47.697	11.718	0.906	447.993	34776	1.34	0.746	0.967
866	KIZ_KAN623-6_4.tif:0002-0153	1.726	194.134	0	1200	61.379	17.403	0.874	335.119	26014	1.208	0.828	0.968
867	KIZ_KAN623-6_4.tif:0003-0161	2.061	151.662	0	947	89.378	18.376	0.807	312.601	24266	1.514	0.661	0.952
868	KIZ_KAN623-6_4.tif:0004-0304	1.907	169.02	0	1284	116.224	34.568	0.93	322.25	25015	1.132	0.883	0.98
869	KIZ_KAN623-6_4.tif:0005-0309	1.804	195.6	0	1279	7.562	35.132	0.889	352.768	27384	1.185	0.844	0.989
870	KIZ_KAN623-6_4.tif:0006-0386	2.332	209.895	0	2045	94.148	43.851	0.884	489.41	37991	1.173	0.852	0.965
871	KIZ_KAN623-6_4.tif:0007-0428	2.499	176.897	0	1251	68.72	48.609	0.929	442.093	34318	1.152	0.868	0.946
872	KIZ_KAN623-6_4.tif:0008-0758	2.589	149.811	0	1128	80.686	86.087	0.854	387.91	30112	1.389	0.72	0.933
873	KIZ_KAN623-6_4.tif:0009-0778	1.378	49.364	0	139	100.602	88.307	0.908	68.044	5282	1.095	0.913	0.986
874	KIZ_KAN623-6_4.tif:0010-0804	1.804	194.521	0	1474	131.518	91.35	0.903	350.822	27233	1.249	0.801	0.966
875	KIZ_KAN623-6_4.tif:0011-0824	2.126	171.794	0	1266	54.501	93.559	0.787	365.16	28346	1.645	0.608	0.943
876	KIZ_KAN623-6_4.tif:0012-0846	1.262	224.776	0	1367	18.614	96.021	0.925	283.77	22028	1.052	0.95	0.99
877	KIZ_KAN623-6_4.tif:0013-1008	1.494	108.845	0	289	122.291	114.46	0.916	162.651	12626	1.061	0.942	0.979
878	KIZ_KAN623-6_4.tif:0014-1131	1.481	174.965	0	777	42.395	128.422	0.882	259.204	20121	1.116	0.896	0.975
879	KIZ_KAN623-6_4.tif:0015-1131	1.34	97.827	0	341	111.58	128.433	0.939	131.064	10174	1.12	0.893	0.972
										21335.2
880	KIZ_KAN623-7_1.tif:0001-0035	2.37	121.913	0	1088	135.131	4.085	0.87	288.975	22432	1.369	0.731	0.948
881	KIZ_KAN623-7_1.tif:0002-0110	2.242	148.069	0	1187	65.139	12.523	0.878	331.898	25764	1.232	0.812	0.983
882	KIZ_KAN623-7_1.tif:0003-0133	1.984	166.227	0	1251	101.714	15.076	0.909	329.773	25599	1.198	0.835	0.966
883	KIZ_KAN623-7_1.tif:0004-0218	1.159	184.167	0	653	38.136	24.8	0.89	213.523	16575	1.111	0.9	1
884	KIZ_KAN623-7_1.tif:0005-0291	2.203	141.105	0	1172	3.238	33.097	0.875	310.836	24129	1.31	0.763	0.942
885	KIZ_KAN623-7_1.tif:0006-0297	1.778	175.188	0	802	122.764	33.755	0.924	311.441	24176	1.18	0.847	0.986
886	KIZ_KAN623-7_1.tif:0007-0392	2.293	142.511	0	869	88.759	44.576	0.924	326.784	25367	1.249	0.801	0.944
887	KIZ_KAN623-7_1.tif:0008-0410	1.984	159.61	0	1360	9.81	46.614	0.886	316.646	24580	1.177	0.849	0.963
888	KIZ_KAN623-7_1.tif:0009-0423	1.237	87.417	0	224	63.623	48.072	0.936	108.108	8392	1.222	0.818	0.985
889	KIZ_KAN623-7_1.tif:0010-0508	1.945	193.073	0	1380	137.509	57.653	0.901	375.569	29154	1.272	0.786	0.99
890	KIZ_KAN623-7_1.tif:0011-0560	1.997	149.877	0	1202	9.76	63.601	0.801	299.268	23231	1.386	0.722	0.92
891	KIZ_KAN623-7_1.tif:0012-0612	1.881	257.13	0	1967	96.005	69.502	0.942	483.613	37541	1.095	0.913	0.977
892	KIZ_KAN623-7_1.tif:0013-0822	2.267	158.205	0	1423	49.268	93.318	0.788	358.693	27844	1.547	0.646	0.896
893	KIZ_KAN623-7_1.tif:0014-0822	1.662	75.566	0	915	116.418	93.277	0.841	125.576	9748	1.444	0.692	0.959
894	KIZ_KAN623-7_1.tif:0015-0971	2.048	173.057	0	1299	88.819	110.255	0.893	354.468	27516	1.35	0.741	0.981
895	KIZ_KAN623-7_1.tif:0016-1085	1.997	153.51	0	1181	122.783	123.13	0.87	306.52	23794	1.257	0.795	0.963
896	KIZ_KAN623-7_1.tif:0017-1091	1.404	207.716	0	868	133.254	123.88	0.897	291.667	22641	1.103	0.907	0.995
897	KIZ_KAN623-7_1.tif:0018-1142	1.829	179.465	0	1471	70.086	129.656	0.892	328.291	25484	1.304	0.767	0.966
898	KIZ_KAN623-7_1.tif:0019-1225	2.048	150.522	0	1061	100.698	139.09	0.883	308.311	23933	1.304	0.767	0.949
899	KIZ_KAN623-7_1.tif:0020-1228	1.804	146.85	0	890	141.326	139.437	0.903	264.846	20559	1.32	0.758	0.952
900	KIZ_KAN623-7_2.tif:0001-0008	2.035	166.38	0	1056	44.4	0.941	0.857	338.649	26288	1.578	0.634	0.955
901	KIZ_KAN623-7_2.tif:0002-0084	2.035	145.373	0	1025	79.376	9.52	0.816	295.892	22969	1.386	0.722	0.935
902	KIZ_KAN623-7_2.tif:0003-0106	2.048	144.887	0	1086	7.902	12.123	0.742	296.768	23037	1.661	0.602	0.919
903	KIZ_KAN623-7_2.tif:0004-0108	1.765	131.891	0	741	32.144	12.275	0.861	232.769	18069	1.227	0.815	0.935
904	KIZ_KAN623-7_2.tif:0005-0240	1.662	211.953	0	1027	59.868	27.245	0.923	352.227	27342	1.105	0.905	0.989
905	KIZ_KAN623-7_2.tif:0006-0265	1.481	104.304	0	474	144.088	30.144	0.964	154.523	11995	1.009	0.991	0.975
906	KIZ_KAN623-7_2.tif:0007-0271	1.597	169.911	0	635	123.177	30.759	0.888	271.416	21069	1.318	0.759	0.976
907	KIZ_KAN623-7_2.tif:0008-0508	1.159	186.267	0	773	48.465	57.715	0.89	215.958	16764	1.111	0.9	1
908	KIZ_KAN623-7_2.tif:0009-0526	1.417	186	0	840	99.142	59.701	0.879	263.571	20460	1.1	0.909	1
909	KIZ_KAN623-7_2.tif:0010-0566	1.404	203.119	0	730	114.063	64.303	0.897	285.213	22140	1.103	0.907	0.995
910	KIZ_KAN623-7_2.tif:0011-0621	1.597	230.113	0	1690	75.328	70.457	0.913	367.582	28534	1.165	0.859	0.98
911	KIZ_KAN623-7_2.tif:0012-0828	2.01	179.59	0	1279	108.903	94.089	0.826	360.909	28016	1.478	0.677	0.951
912	KIZ_KAN623-7_2.tif:0013-0927	0.824	184.828	6	407	49.032	105.215	0.914	152.384	11829	1	1	1
913	KIZ_KAN623-7_2.tif:0014-1061	1.275	208.96	0	1038	65.381	120.418	0.905	266.495	20687	1.025	0.975	0.995
914	KIZ_KAN623-7_2.tif:0015-1076	1.159	183.067	0	918	134.157	122.183	0.89	212.248	16476	1.111	0.9	1
915	KIZ_KAN623-7_2.tif:0016-1113	1.688	113.863	0	596	105.705	126.332	0.868	192.152	14916	1.394	0.717	0.926
916	KIZ_KAN623-7_2.tif:0017-1132	1.159	165.7	0	779	36.661	128.539	0.89	192.113	14913	1.111	0.9	1
917	KIZ_KAN623-7_2.tif:0018-1235	1.675	186.485	0	1147	104.736	140.182	0.848	312.304	24243	1.257	0.795	0.952
918	KIZ_KAN623-7_2.tif:0019-1254	1.404	188.661	0	959	4.318	142.381	0.897	264.911	20564	1.103	0.907	0.995
919	KIZ_KAN623-7_3.tif:0001-0053	2.229	123.936	0	819	119.923	6.015	0.8	276.208	21441	1.693	0.591	0.925
920	KIZ_KAN623-7_3.tif:0002-0145	2.151	158.635	0	1155	43.749	16.5	0.772	341.277	26492	1.833	0.546	0.925
921	KIZ_KAN623-7_3.tif:0003-0199	1.275	235.283	0	1344	31.785	22.581	0.905	300.066	23293	1.025	0.975	0.995
922	KIZ_KAN623-7_3.tif:0004-0304	1.52	203.856	0	1123	120.475	34.556	0.931	309.883	24055	1.022	0.979	0.987
923	KIZ_KAN623-7_3.tif:0005-0408	2.396	123.156	0	802	84.31	46.346	0.86	295.094	22907	1.377	0.726	0.954
924	KIZ_KAN623-7_3.tif:0006-0419	1.494	216.129	0	1465	66.459	47.609	0.943	322.971	25071	1.105	0.905	0.983
925	KIZ_KAN623-7_3.tif:0007-0428	1.378	219.766	0	1319	45.849	48.639	0.908	302.926	23515	1.127	0.887	0.986
926	KIZ_KAN623-7_3.tif:0008-0454	2.01	153.994	0	702	102.246	51.573	0.898	309.47	24023	1.211	0.826	0.969
927	KIZ_KAN623-7_3.tif:0009-0606	1.456	166.106	0	818	24.704	68.822	0.842	241.8	18770	1.478	0.677	0.983
928	KIZ_KAN623-7_3.tif:0010-0655	1.855	121.681	0	600	127.887	74.357	0.727	225.723	17522	2.018	0.496	0.917
929	KIZ_KAN623-7_3.tif:0011-0744	2.087	129.58	0	787	71.575	84.439	0.878	270.424	20992	1.367	0.731	0.95
930	KIZ_KAN623-7_3.tif:0012-0780	1.507	216.564	0	1186	38.14	88.526	0.897	326.411	25338	1.215	0.823	0.987
931	KIZ_KAN623-7_3.tif:0013-1023	1.043	182.099	0	930	20.146	116.167	0.899	190.013	14750	1	1	1
932	KIZ_KAN623-7_3.tif:0014-1164	1.507	174.829	0	917	63.957	132.171	0.951	263.506	20455	1	1	0.983
933	KIZ_KAN623-7_4.tif:0001-0026	1.469	165.491	0	747	78.323	2.931	0.927	243.037	18866	1.2	0.833	0.979
934	KIZ_KAN623-7_4.tif:0002-0204	1.52	199.669	0	829	129.452	23.216	0.931	303.519	23561	1.022	0.979	0.987
935	KIZ_KAN623-7_4.tif:0003-0273	2.319	163.517	0	966	41.117	30.992	0.9	379.163	29433	1.35	0.741	0.973
936	KIZ_KAN623-7_4.tif:0004-0306	0.812	89.46	0	216	77.867	34.725	0.937	72.604	5636	1.039	0.963	0.992
937	KIZ_KAN623-7_4.tif:0005-0309	2.383	171.584	0	1642	107.881	35.145	0.722	408.921	31743	1.707	0.586	0.883
938	KIZ_KAN623-7_4.tif:0006-0399	0.631	7.429	0	43	23.665	45.343	0.935	4.689	364	1	1	1
939	KIZ_KAN623-7_4.tif:0007-0513	2.345	179.72	0	1726	63.447	58.209	0.797	421.366	32709	1.463	0.684	0.905
940	KIZ_KAN623-7_4.tif:0008-0533	1.391	191.935	0	957	5.959	60.496	0.916	267.036	20729	1.112	0.9	0.991
941	KIZ_KAN623-7_4.tif:0009-0559	1.018	20.924	0	140	136.949	63.503	0.941	21.294	1653	1.001	0.999	0.988
942	KIZ_KAN623-7_4.tif:0010-0611	2.113	209.921	0	1528	108.445	69.336	0.911	443.497	34427	1.21	0.827	0.959
943	KIZ_KAN623-7_4.tif:0011-0710	2.023	175.656	0	1290	33.894	80.616	0.749	355.267	27578	1.537	0.651	0.9
944	KIZ_KAN623-7_4.tif:0012-0764	1.043	16.506	0	90	70.881	86.771	0.899	17.224	1337	1	1	1
945	KIZ_KAN623-7_4.tif:0013-0925	1.391	195.741	0	981	12.655	104.978	0.916	272.331	21140	1.1	0.909	0.991
946	KIZ_KAN623-7_4.tif:0014-0937	1.778	181.507	0	1351	39.398	106.411	0.867	322.675	25048	1.383	0.723	0.945
947	KIZ_KAN623-7_4.tif:0015-0982	1.494	217.026	0	1472	100.283	111.508	0.916	324.311	25175	1.06	0.943	0.979
948	KIZ_KAN623-7_4.tif:0016-1201	0.631	4.776	0	24	119.459	136.37	0.935	3.014	234	1	1	1
										21261.3
949	KIZ_KAN623-8_1.tif:0001-0014	1.417	134.218	0	780	16.25	1.643	0.81	190.194	14764	1.423	0.703	0.909
950	KIZ_KAN623-8_1.tif:0002-0064	1.713	82.406	0	569	115.872	7.259	0.941	141.189	10960	1.083	0.923	0.967
951	KIZ_KAN623-8_1.tif:0003-0106	1.752	144.147	0	688	38.145	12.031	0.936	252.544	19604	1.033	0.968	0.975
952	KIZ_KAN623-8_1.tif:0004-0224	2.138	129.916	0	1174	85.213	25.494	0.891	277.819	21566	1.308	0.764	0.933
953	KIZ_KAN623-8_1.tif:0005-0236	1.984	133.013	0	1241	137.237	26.839	0.815	263.88	20484	1.67	0.599	0.936
954	KIZ_KAN623-8_1.tif:0006-0337	2.087	119.586	0	1125	16.571	38.25	0.81	249.568	19373	1.459	0.685	0.92
955	KIZ_KAN623-8_1.tif:0007-0371	1.147	45.798	0	311	112.427	42.114	0.909	52.508	4076	1.115	0.897	0.994
956	KIZ_KAN623-8_1.tif:0008-0391	0.631	32.143	0	278	34.788	44.435	0.935	20.29	1575	1	1	1
957	KIZ_KAN623-8_1.tif:0009-0527	1.353	64.143	0	219	64.916	59.865	0.919	86.762	6735	1.12	0.893	0.977
958	KIZ_KAN623-8_1.tif:0010-0526	0.631	150.592	0	378	88.36	59.758	0.935	95.058	7379	1	1	1
959	KIZ_KAN623-8_1.tif:0011-0567	1.997	149.2	0	1185	76.122	64.419	0.915	297.915	23126	1.144	0.874	0.969
960	KIZ_KAN623-8_1.tif:0012-0594	0.812	114.079	0	510	105.902	67.425	0.937	92.585	7187	1.039	0.963	0.992
961	KIZ_KAN623-8_1.tif:0013-0616	2.383	100.978	0	542	20.867	69.936	0.855	240.653	18681	1.366	0.732	0.946
962	KIZ_KAN623-8_1.tif:0014-0657	1.005	38.346	0	126	115.43	74.57	0.929	38.531	2991	1.259	0.794	0.987
963	KIZ_KAN623-8_1.tif:0015-0703	1.597	119.258	0	1025	39.395	79.793	0.877	190.503	14788	1.315	0.76	0.932
964	KIZ_KAN623-8_1.tif:0016-0743	2.357	115.77	0	1242	18.215	84.423	0.745	272.923	21186	1.762	0.568	0.886
965	KIZ_KAN623-8_1.tif:0017-0806	1.043	152.691	0	568	98.575	91.538	0.899	159.328	12368	1	1	1
966	KIZ_KAN623-8_1.tif:0018-0845	2.435	108.921	0	1110	49.057	95.937	0.81	265.194	20586	1.659	0.603	0.938
967	KIZ_KAN623-8_1.tif:0019-0883	0.915	60.324	0	220	40.185	100.284	0.924	55.175	4283	1.13	0.885	0.993
968	KIZ_KAN623-8_1.tif:0020-0960	2.435	114.212	0	861	133.199	109.009	0.828	278.076	21586	1.518	0.659	0.931
969	KIZ_KAN623-8_1.tif:0021-1014	2.628	99.309	0	1230	79.509	115.076	0.767	260.982	20259	1.575	0.635	0.879
970	KIZ_KAN623-8_1.tif:0022-1117	2.422	102.261	0	1346	86.122	126.804	0.765	247.661	19225	1.75	0.571	0.895
971	KIZ_KAN623-8_1.tif:0023-1138	1.288	141.07	0	757	60.158	129.205	0.875	181.73	14107	1.242	0.805	0.952
972	KIZ_KAN623-8_2.tif:0001-0025	1.907	153.608	0	1303	61.768	2.82	0.831	292.865	22734	1.306	0.765	0.937
973	KIZ_KAN623-8_2.tif:0002-0053	0.631	66.633	0	135	6.64	6.072	0.935	42.061	3265	1	1	1
974	KIZ_KAN623-8_2.tif:0003-0064	1.043	183.63	0	514	88.019	7.321	0.899	191.611	14874	1	1	1
975	KIZ_KAN623-8_2.tif:0004-0101	1.688	83.901	0	459	15.835	11.507	0.927	141.589	10991	1.24	0.806	0.967
976	KIZ_KAN623-8_2.tif:0005-0164	1.095	137.106	0	688	83.919	18.628	0.929	150.13	11654	1.185	0.844	0.977
977	KIZ_KAN623-8_2.tif:0006-0213	1.726	135.813	0	1065	140.876	24.168	0.922	234.444	18199	1.036	0.966	0.968
978	KIZ_KAN623-8_2.tif:0007-0226	2.293	143.978	0	1156	43.416	25.683	0.911	330.146	25628	1.223	0.818	0.97
979	KIZ_KAN623-8_2.tif:0008-0271	1.7	93.273	0	347	123.645	30.83	0.934	158.606	12312	1.196	0.836	0.967
980	KIZ_KAN623-8_2.tif:0009-0291	2.087	145.488	0	1463	110.887	33.049	0.878	303.622	23569	1.295	0.772	0.956
981	KIZ_KAN623-8_2.tif:0010-0485	1.984	83.968	0	547	55.977	55.01	0.932	166.58	12931	1.195	0.837	0.972
982	KIZ_KAN623-8_2.tif:0011-0484	1.907	120.243	0	995	79.002	54.918	0.92	229.253	17796	1.267	0.789	0.952
983	KIZ_KAN623-8_2.tif:0012-0564	0.902	37.957	0	313	41.882	64.071	0.947	34.228	2657	1.146	0.873	0.986
984	KIZ_KAN623-8_2.tif:0013-0588	1.469	54.342	0	350	142.049	66.79	0.927	79.806	6195	1.019	0.981	0.97
985	KIZ_KAN623-8_2.tif:0014-0678	1.443	164.268	0	1057	32.015	76.964	0.884	237.008	18398	1.235	0.81	0.966
986	KIZ_KAN623-8_2.tif:0015-0762	0.631	78.082	0	292	10.612	86.544	0.935	49.287	3826	1	1	1
987	KIZ_KAN623-8_2.tif:0016-0819	1.791	112.799	0	848	124.168	93.026	0.946	201.981	15679	1.253	0.798	0.959
988	KIZ_KAN623-8_2.tif:0017-0864	1.958	120.862	0	630	55.908	98.132	0.897	236.66	18371	1.024	0.977	0.95
989	KIZ_KAN623-8_2.tif:0018-0931	1.804	132.071	0	879	91.28	105.719	0.927	238.193	18490	1.308	0.765	0.959
990	KIZ_KAN623-8_2.tif:0019-0995	1.378	177.252	0	1178	76.721	112.994	0.908	244.325	18966	1.127	0.887	0.986
991	KIZ_KAN623-8_2.tif:0020-1101	1.585	122.854	0	732	37.299	124.954	0.906	194.664	15111	1.139	0.878	0.969
992	KIZ_KAN623-8_2.tif:0021-1148	0.721	51	0	101	60.496	130.355	0.92	36.792	2856	1.143	0.875	1
993	KIZ_KAN623-8_2.tif:0022-1160	2.01	154.885	0	982	116.86	131.736	0.898	311.261	24162	1.032	0.969	0.963
994	KIZ_KAN623-8_2.tif:0023-1171	1.713	139.15	0	860	96.651	132.947	0.891	238.412	18507	1.245	0.803	0.964
995	KIZ_KAN623-8_2.tif:0024-1195	1.675	98.138	0	603	15.665	135.65	0.973	164.352	12758	1.098	0.911	0.967
996	KIZ_KAN623-8_2.tif:0025-1263	1.378	74.514	0	203	133.084	143.355	0.936	102.71	7973	1.102	0.907	0.986
997	KIZ_KAN623-8_3.tif:0001-0031	1.559	45.397	0	205	86.531	3.497	0.944	70.762	5493	1.12	0.893	0.968
998	KIZ_KAN623-8_3.tif:0002-0088	1.907	151.966	0	819	13.572	9.996	0.93	289.735	22491	1.109	0.902	0.98
999	KIZ_KAN623-8_3.tif:0003-0133	2.525	112.163	0	999	38.061	15.169	0.898	283.203	21984	1.297	0.771	0.956
1000	KIZ_KAN623-8_3.tif:0004-0152	1.546	189.558	0	968	122.982	17.304	0.894	293.033	22747	1.021	0.979	0.996
1001	KIZ_KAN623-8_3.tif:0005-0333	1.134	7.466	0	34	12.315	37.796	0.93	8.464	657	1.126	0.888	0.989
1002	KIZ_KAN623-8_3.tif:0006-0373	1.971	123.131	0	699	87.442	42.385	0.859	242.689	18839	1.437	0.696	0.962
1003	KIZ_KAN623-8_3.tif:0007-0378	1.572	98.697	0	461	35.984	42.961	0.924	155.115	12041	1.133	0.883	0.964
1004	KIZ_KAN623-8_3.tif:0008-0395	1.314	127.176	0	952	142.773	44.891	0.95	167.109	12972	1.176	0.85	0.971
1005	KIZ_KAN623-8_3.tif:0009-0437	1.043	61.988	0	159	73.491	49.656	0.899	64.682	5021	1	1	1
1006	KIZ_KAN623-8_3.tif:0010-0463	1.971	118.405	0	865	101.476	52.563	0.903	233.375	18116	1.249	0.8	0.962
1007	KIZ_KAN623-8_3.tif:0011-0501	1.868	131.828	0	1235	6.421	56.946	0.878	246.244	19115	1.255	0.797	0.935
1008	KIZ_KAN623-8_3.tif:0012-0513	1.559	116.926	0	850	142.065	58.243	0.866	182.258	14148	1.238	0.808	0.957
1009	KIZ_KAN623-8_3.tif:0013-0653	2.113	102.744	0	958	49.492	74.103	0.82	217.066	16850	1.574	0.635	0.927
1010	KIZ_KAN623-8_3.tif:0014-0848	1.108	73.674	0	461	63.494	96.237	0.94	81.622	6336	1.16	0.862	0.983
1011	KIZ_KAN623-8_3.tif:0015-0888	1.623	126.151	0	675	129.894	100.77	0.928	204.763	15895	1.116	0.896	0.977
1012	KIZ_KAN623-8_3.tif:0016-0981	1.043	159.173	0	905	35.242	111.4	0.899	166.091	12893	1	1	1
1013	KIZ_KAN623-8_3.tif:0017-1005	1.855	108.451	0	641	103.054	114.064	0.72	201.182	15617	1.746	0.573	0.867
1014	KIZ_KAN623-8_3.tif:0018-1122	0.631	155.245	6	410	4.71	127.404	0.935	97.995	7607	1	1	1
1015	KIZ_KAN623-8_3.tif:0019-1233	1.597	128.056	0	664	98.235	139.936	0.939	204.557	15879	1.146	0.872	0.973
1016	KIZ_KAN623-8_4.tif:0001-0071	1.662	95.674	0	274	42.837	8.117	0.966	158.993	12342	1.236	0.809	0.963
1017	KIZ_KAN623-8_4.tif:0002-0201	1.791	116.964	0	1002	144.342	22.834	0.896	209.44	16258	1.309	0.764	0.959
1018	KIZ_KAN623-8_4.tif:0003-0235	2.345	104.159	0	1095	34.919	26.74	0.852	244.209	18957	1.57	0.637	0.926
1019	KIZ_KAN623-8_4.tif:0004-0290	2.409	121.93	0	1298	119.917	32.901	0.864	293.728	22801	1.349	0.742	0.964
1020	KIZ_KAN623-8_4.tif:0005-0351	1.134	143.477	0	635	69.133	39.895	0.93	162.651	12626	1.11	0.901	0.989
1021	KIZ_KAN623-8_4.tif:0006-0370	2.1	116.282	0	762	3.063	42.021	0.906	244.17	18954	1.16	0.862	0.962
1022	KIZ_KAN623-8_4.tif:0007-0452	1.971	139.353	0	1019	22.156	51.322	0.859	274.662	21321	1.41	0.709	0.962
1023	KIZ_KAN623-8_4.tif:0008-0493	1.713	89.707	0	920	53.35	55.961	0.941	153.698	11931	1.048	0.954	0.964
1024	KIZ_KAN623-8_4.tif:0009-0531	1.932	133.66	0	1033	119.508	60.29	0.885	258.276	20049	1.324	0.755	0.958
1025	KIZ_KAN623-8_4.tif:0010-0614	1.971	118.176	0	873	74.351	69.773	0.881	232.924	18081	1.124	0.89	0.953
1026	KIZ_KAN623-8_4.tif:0011-0626	2.113	124.463	0	832	17.32	71.061	0.889	262.953	20412	1.333	0.75	0.965
1027	KIZ_KAN623-8_4.tif:0012-0685	2.1	127.804	0	1167	103.391	77.798	0.928	268.363	20832	1.25	0.8	0.962
1028	KIZ_KAN623-8_4.tif:0013-0738	1.971	94.81	0	925	132.347	83.757	0.765	186.87	14506	1.478	0.677	0.879
1029	KIZ_KAN623-8_4.tif:0014-0858	1.031	124.65	0	495	122.302	97.434	0.919	128.462	9972	1.031	0.97	0.994
1030	KIZ_KAN623-8_4.tif:0015-0870	1.52	117.254	0	329	48.106	98.73	0.948	178.239	13836	1.159	0.863	0.959
1031	KIZ_KAN623-8_4.tif:0016-0922	2.229	105.324	0	1201	128.831	104.689	0.865	234.728	18221	1.202	0.832	0.94
1032	KIZ_KAN623-8_4.tif:0017-0931	2.061	15.537	0	66	28.771	105.669	0.889	32.025	2486	1.412	0.708	0.961
1033	KIZ_KAN623-8_4.tif:0018-1036	1.211	116.309	0	516	39.394	117.576	0.979	140.842	10933	1.046	0.956	0.974
1034	KIZ_KAN623-8_4.tif:0019-1067	1.881	114.904	0	666	141.614	121.101	0.894	216.113	16776	1.291	0.775	0.977
1035	KIZ_KAN623-8_4.tif:0020-1100	1.958	134.276	0	813	103.227	124.912	0.97	262.927	20410	1.189	0.841	0.962
1036	KIZ_KAN623-8_4.tif:0021-1218	1.031	157.637	0	696	8.564	138.305	0.919	162.458	12611	1.031	0.97	0.994
1037	KIZ_KAN623-8_4.tif:0022-1221	1.945	96.993	0	678	55.342	138.564	0.839	188.673	14646	1.447	0.691	0.932
										14589.4
1038	KIZ_KAN623-9_1.tif:0001-0023	1.907	132.527	0	641	82.435	2.633	0.874	252.672	19614	1.304	0.767	0.952
1039	KIZ_KAN623-9_1.tif:0002-0032	2.087	70.537	0	695	143.131	3.632	0.829	147.205	11427	1.346	0.743	0.915
1040	KIZ_KAN623-9_1.tif:0003-0046	1.958	138.151	0	1414	32.516	5.295	0.944	270.514	20999	1.017	0.983	0.962
1041	KIZ_KAN623-9_1.tif:0004-0065	1.726	151.149	0	801	74.608	7.461	0.922	260.917	20254	1.233	0.811	0.971
1042	KIZ_KAN623-9_1.tif:0005-0101	1.932	132.533	0	1197	85.737	11.507	0.885	256.099	19880	1.172	0.853	0.94
1043	KIZ_KAN623-9_1.tif:0006-0268	1.597	116.806	0	525	62.355	30.443	0.888	186.587	14484	1.341	0.746	0.976
1044	KIZ_KAN623-9_1.tif:0007-0272	0.631	147.776	0	242	65.773	30.929	0.935	93.28	7241	1	1	1
1045	KIZ_KAN623-9_1.tif:0008-0349	1.005	104.782	0	347	51.519	39.6	0.896	105.287	8173	1.265	0.791	0.987
1046	KIZ_KAN623-9_1.tif:0009-0368	1.391	161.343	0	599	37.464	41.825	0.916	224.473	17425	1.1	0.909	0.991
1047	KIZ_KAN623-9_1.tif:0010-0398	1.7	136.311	0	1288	128.964	45.182	0.884	231.79	17993	1.412	0.708	0.974
1048	KIZ_KAN623-9_1.tif:0011-0421	1.391	175.593	0	659	53.402	47.784	0.916	244.299	18964	1.112	0.9	0.991
1049	KIZ_KAN623-9_1.tif:0012-0483	1.61	193.408	0	1282	91.878	54.826	0.92	311.441	24176	1.143	0.875	0.977
1050	KIZ_KAN623-9_1.tif:0013-0490	1.366	160.085	0	630	65.68	55.606	0.927	218.599	16969	1.106	0.904	0.986
1051	KIZ_KAN623-9_1.tif:0014-0615	0.915	121.789	0	527	43.476	69.866	0.924	111.393	8647	1.13	0.885	0.993
1052	KIZ_KAN623-9_1.tif:0015-0638	1.237	48.198	0	385	19.932	72.476	0.906	59.606	4627	1.216	0.823	0.985
1053	KIZ_KAN623-9_1.tif:0016-0812	1.404	106.817	0	503	106.998	92.123	0.886	149.988	11643	1.304	0.767	0.96
1054	KIZ_KAN623-9_1.tif:0017-0819	2.216	119.233	0	1127	79.39	93.011	0.901	264.189	20508	1.317	0.759	0.95
1055	KIZ_KAN623-9_1.tif:0018-0872	1.262	186.878	0	1200	121.445	98.972	0.925	235.926	18314	1.052	0.95	0.99
1056	KIZ_KAN623-9_1.tif:0019-0912	1.121	157.77	0	518	62.988	103.575	0.889	176.822	13726	1.375	0.727	0.994
1057	KIZ_KAN623-9_1.tif:0020-0946	1.417	169.082	0	897	34.107	107.371	0.879	239.597	18599	1.1	0.909	1
1058	KIZ_KAN623-9_1.tif:0021-0997	1.997	121.535	0	1349	141.9	113.176	0.757	242.676	18838	1.505	0.665	0.883
1059	KIZ_KAN623-9_1.tif:0022-1033	1.25	6.113	0	42	133.604	117.24	0.916	7.639	593	1.022	0.979	0.985
1060	KIZ_KAN623-9_1.tif:0023-1081	1.327	53.233	0	213	42.916	122.746	0.96	70.633	5483	1.139	0.878	0.972
1061	KIZ_KAN623-9_1.tif:0024-1197	1.378	139.804	0	690	65.494	135.912	0.908	192.706	14959	1.127	0.887	0.986
1062	KIZ_KAN623-9_1.tif:0025-1215	1.275	216.818	0	1246	115.084	137.908	0.905	276.518	21465	1.025	0.975	0.995
1063	KIZ_KAN623-9_2.tif:0001-0100	1.688	122.344	0	1024	125.778	11.345	0.927	206.464	16027	1.117	0.895	0.956
1064	KIZ_KAN623-9_2.tif:0002-0144	1.932	170.413	0	1347	134.439	16.392	0.863	329.296	25562	1.485	0.673	0.965
1065	KIZ_KAN623-9_2.tif:0003-0174	1.043	162.099	0	1070	69.065	19.806	0.899	169.144	13130	1	1	1
1066	KIZ_KAN623-9_2.tif:0004-0223	1.533	114.622	0	616	36.733	25.301	0.902	175.714	13640	1.403	0.713	0.967
1067	KIZ_KAN623-9_2.tif:0005-0280	1.765	137.584	0	519	55.764	31.82	0.87	242.818	18849	1.216	0.822	0.979
1068	KIZ_KAN623-9_2.tif:0006-0302	2.1	100.963	0	828	82.947	34.35	0.796	212.003	16457	1.695	0.59	0.931
1069	KIZ_KAN623-9_2.tif:0007-0419	1.159	175.267	0	924	8.002	47.557	0.89	203.205	15774	1.111	0.9	1
1070	KIZ_KAN623-9_2.tif:0008-0423	1.868	157.166	0	1185	107.891	48.009	0.911	293.574	22789	1.201	0.833	0.973
1071	KIZ_KAN623-9_2.tif:0009-0742	1.907	146.926	0	1101	126.592	84.284	0.802	280.125	21745	1.391	0.719	0.897
1072	KIZ_KAN623-9_2.tif:0010-0849	1.739	111.481	0	693	79.495	96.394	0.904	193.878	15050	1.23	0.813	0.975
1073	KIZ_KAN623-9_2.tif:0011-0869	1.597	209.935	0	1358	109.009	98.639	0.913	335.351	26032	1.185	0.844	0.976
1074	KIZ_KAN623-9_2.tif:0012-0942	1.134	148.273	0	508	23.447	106.905	0.899	168.088	13048	1.117	0.895	0.989
1075	KIZ_KAN623-9_2.tif:0013-1033	1.159	170.944	0	851	130.014	117.246	0.89	198.193	15385	1.111	0.9	1
1076	KIZ_KAN623-9_2.tif:0014-1041	1.572	155.697	0	972	34.711	118.155	0.873	244.698	18995	1.311	0.763	0.968
1077	KIZ_KAN623-9_3.tif:0001-0050	1.275	163.283	0	881	90.465	5.67	0.905	208.242	16165	1.025	0.975	0.995
1078	KIZ_KAN623-9_3.tif:0002-0067	1.404	120.505	0	490	133.593	7.618	0.913	169.208	13135	1.249	0.8	0.96
1079	KIZ_KAN623-9_3.tif:0003-0140	1.005	100.333	0	406	113.954	15.89	0.929	100.817	7826	1.259	0.794	0.987
1080	KIZ_KAN623-9_3.tif:0004-0159	1.121	40.69	0	131	34.499	18.108	0.951	45.603	3540	1.146	0.872	0.983
1081	KIZ_KAN623-9_3.tif:0005-0200	1.043	135.185	0	576	49.883	22.757	0.899	141.061	10950	1	1	1
1082	KIZ_KAN623-9_3.tif:0006-0217	1.327	45.233	0	148	141.597	24.634	0.96	60.018	4659	1.153	0.867	0.976
1083	KIZ_KAN623-9_3.tif:0007-0281	1.7	140.674	0	1191	27.588	31.869	0.861	239.211	18569	1.437	0.696	0.971
1084	KIZ_KAN623-9_3.tif:0008-0328	1.494	111.836	0	767	85.432	37.266	0.889	167.121	12973	1.09	0.918	0.983
1085	KIZ_KAN623-9_3.tif:0009-0443	1.043	163.951	0	735	27.524	50.337	0.899	171.076	13280	1	1	1
1086	KIZ_KAN623-9_3.tif:0010-0542	1.675	108.185	0	743	61.757	61.502	0.871	181.176	14064	1.244	0.804	0.952
1087	KIZ_KAN623-9_3.tif:0011-0629	1.765	122.409	0	1143	119.136	71.407	0.838	216.035	16770	1.324	0.755	0.938
1088	KIZ_KAN623-9_3.tif:0012-0761	1.366	165.028	0	948	119.042	86.353	0.862	225.349	17493	1.329	0.753	0.938
1089	KIZ_KAN623-9_3.tif:0013-0811	1.237	67.615	0	256	37.848	92.099	0.936	83.619	6491	1.222	0.818	0.985
1090	KIZ_KAN623-9_3.tif:0014-0817	1.043	163.272	0	753	45.457	92.786	0.899	170.368	13225	1	1	1
1091	KIZ_KAN623-9_3.tif:0015-0851	1.997	150.103	0	1097	100.98	96.644	0.915	299.718	23266	1.055	0.948	0.96
1092	KIZ_KAN623-9_3.tif:0016-1023	2.035	210.981	0	1491	50.663	116.114	0.878	429.43	33335	1.348	0.742	0.958
1093	KIZ_KAN623-9_3.tif:0017-1030	1.791	128.345	0	1036	121.977	116.859	0.896	229.819	17840	1.295	0.772	0.955
1094	KIZ_KAN623-9_3.tif:0018-1089	1.919	105.463	0	900	101.597	123.619	0.879	202.432	15714	1.271	0.787	0.949
1095	KIZ_KAN623-9_3.tif:0019-1235	1.275	142.515	0	621	35.923	140.229	0.877	181.756	14109	1.222	0.818	1
1096	KIZ_KAN623-9_3.tif:0020-1258	1.108	104.581	0	300	108.517	142.82	0.94	115.863	8994	1.123	0.891	0.983
1097	KIZ_KAN623-9_4.tif:0001-0052	1.366	134.434	0	908	114.283	5.951	0.873	183.572	14250	1.329	0.752	0.991
1098	KIZ_KAN623-9_4.tif:0002-0056	1.804	138.343	0	1149	72.509	6.311	0.857	249.503	19368	1.37	0.73	0.959
1099	KIZ_KAN623-9_4.tif:0003-0081	0.824	63.312	0	126	132.001	9.194	0.914	52.199	4052	1	1	1
1100	KIZ_KAN623-9_4.tif:0004-0157	1.25	66.021	0	394	50.224	17.888	0.916	82.498	6404	1.22	0.82	0.99
1101	KIZ_KAN623-9_4.tif:0005-0225	1.546	158.375	0	965	134.105	25.526	0.909	244.827	19005	1.252	0.799	0.964
1102	KIZ_KAN623-9_4.tif:0006-0281	1.868	84.903	0	591	49.05	31.921	0.806	158.593	12311	1.596	0.626	0.906
1103	KIZ_KAN623-9_4.tif:0007-0312	0.812	30.206	0	247	12.252	35.418	0.937	24.515	1903	1.039	0.963	0.992
1104	KIZ_KAN623-9_4.tif:0008-0348	1.752	243.059	0	1601	118.688	39.532	0.887	425.836	33056	1.187	0.843	0.975
1105	KIZ_KAN623-9_4.tif:0009-0553	1.868	110.497	0	754	103.548	62.836	0.834	206.399	16022	1.353	0.739	0.929
1106	KIZ_KAN623-9_4.tif:0010-0567	1.211	50.128	0	446	137.919	64.335	0.917	60.701	4712	1.144	0.874	0.974
1107	KIZ_KAN623-9_4.tif:0011-0650	1.159	191.422	0	970	83.082	73.832	0.89	221.935	17228	1.111	0.9	1
1108	KIZ_KAN623-9_4.tif:0012-0692	1.404	229.312	0	1365	73.042	78.547	0.897	321.992	24995	1.103	0.907	0.995
1109	KIZ_KAN623-9_4.tif:0013-0722	0.631	103.673	0	726	59.19	82.004	0.935	65.442	5080	1	1	1
1110	KIZ_KAN623-9_4.tif:0014-0833	1.134	151.023	0	643	119.629	94.602	0.93	171.205	13290	1.126	0.888	0.989
1111	KIZ_KAN623-9_4.tif:0015-0865	0.915	58.704	0	478	29.97	98.228	0.924	53.693	4168	1.13	0.885	0.993
1112	KIZ_KAN623-9_4.tif:0016-0898	2.705	7.724	0	41	38.854	101.913	0.892	20.895	1622	1.209	0.827	0.955
1113	KIZ_KAN623-9_4.tif:0017-0952	0.631	211.224	22	490	6.98	108.109	0.935	133.331	10350	1	1	1
1114	KIZ_KAN623-9_4.tif:0018-1018	1.391	175.565	0	1044	102.491	115.6	0.916	244.26	18961	1.112	0.9	0.991
1115	KIZ_KAN623-9_4.tif:0019-1093	1.159	149.8	0	600	78.145	124.056	0.89	173.679	13482	1.111	0.9	1
1116	KIZ_KAN623-9_4.tif:0020-1102	1.275	209.414	0	1150	63.225	125.072	0.905	267.075	20732	1.025	0.975	0.995
1117	KIZ_KAN623-9_4.tif:0021-1150	1.275	164.01	0	713	57.096	130.52	0.905	209.169	16237	1.025	0.975	0.995
										14838.9
1	KIZ_KAN623-10_1.tif:0001-0006	0.953	35.446	0	587	44.334	0.65	0.699	33.79	2623	2.429	0.412	0.937
2	KIZ_KAN623-10_1.tif:0002-0096	1.52	253.525	0	1722	131.485	10.957	0.905	385.385	29916	1.063	0.941	0.987
3	KIZ_KAN623-10_1.tif:0003-0099	1.043	198.741	0	594	74.967	11.293	0.899	207.378	16098	1	1	1
4	KIZ_KAN623-10_1.tif:0004-0168	1.778	236.572	0	1486	15.209	19.076	0.924	420.567	32647	1.069	0.935	0.982
5	KIZ_KAN623-10_1.tif:0005-0172	1.404	213.596	0	1105	57.266	19.527	0.897	299.925	23282	1.103	0.907	0.995
6	KIZ_KAN623-10_1.tif:0006-0225	1.507	234.094	0	1409	101.534	25.603	0.924	352.832	27389	1.084	0.923	0.987
7	KIZ_KAN623-10_1.tif:0007-0274	1.018	134.481	0	566	109.823	31.156	0.941	136.861	10624	1.001	0.999	0.988
8	KIZ_KAN623-10_1.tif:0008-0328	1.211	116.372	0	356	9.481	37.28	0.917	140.919	10939	1.233	0.811	0.974
9	KIZ_KAN623-10_1.tif:0009-0338	1.881	136.034	0	960	32.473	38.368	0.862	255.854	19861	1.366	0.732	0.936
10	KIZ_KAN623-10_1.tif:0010-0414	2.126	167.576	0	1364	123.952	47.042	0.895	356.194	27650	1.305	0.766	0.962
11	KIZ_KAN623-10_1.tif:0011-0554	1.147	207.876	0	895	0.846	62.873	0.909	238.335	18501	1.115	0.897	0.994
12	KIZ_KAN623-10_1.tif:0012-0575	1.559	151.355	0	509	25.809	65.272	0.891	235.926	18314	1.242	0.805	0.964
13	KIZ_KAN623-10_1.tif:0013-0715	1.662	163.752	0	1168	45.779	81.191	0.864	272.125	21124	1.286	0.778	0.949
14	KIZ_KAN623-10_1.tif:0014-0723	1.366	201.566	0	921	135.159	82.117	0.899	275.242	21366	1.111	0.9	0.981
15	KIZ_KAN623-10_1.tif:0015-0765	1.018	115.646	0	443	94.046	86.874	0.908	117.692	9136	1.058	0.946	0.988
16	KIZ_KAN623-10_1.tif:0016-0828	1.159	165.856	0	685	11.01	94.035	0.89	192.293	14927	1.111	0.9	1
17	KIZ_KAN623-10_1.tif:0017-0881	1.829	172.908	0	1153	96.123	100.074	0.892	316.298	24553	1.208	0.828	0.956
18	KIZ_KAN623-10_1.tif:0018-0965	2.023	201.503	0	1477	77.686	109.595	0.927	407.543	31636	1.104	0.906	0.966
19	KIZ_KAN623-10_1.tif:0019-0966	1.752	140.404	0	840	135.116	109.626	0.877	245.987	19095	1.317	0.759	0.944
20	KIZ_KAN623-10_1.tif:0020-1082	1.675	168.446	0	1114	50.36	122.817	0.871	282.096	21898	1.192	0.839	0.952
21	KIZ_KAN623-10_2.tif:0001-0042	1.726	158.545	0	1098	118.32	4.821	0.898	273.683	21245	1.225	0.816	0.968
22	KIZ_KAN623-10_2.tif:0002-0053	1.881	132.76	0	874	61.59	6.067	0.862	249.697	19383	1.476	0.677	0.948
23	KIZ_KAN623-10_2.tif:0003-0078	1.662	185.519	0	987	49.255	8.897	0.898	308.298	23932	1.096	0.912	0.989
24	KIZ_KAN623-10_2.tif:0004-0109	2.138	203.41	0	1696	21.025	12.395	0.922	434.982	33766	1.143	0.875	0.968
25	KIZ_KAN623-10_2.tif:0005-0154	1.52	217.39	0	1221	86.434	17.55	0.905	330.456	25652	1.019	0.982	0.987
26	KIZ_KAN623-10_2.tif:0006-0210	1.237	177.125	0	1107	112.593	23.836	0.936	219.05	17004	1.1	0.909	0.98
27	KIZ_KAN623-10_2.tif:0007-0278	1.224	144.663	0	424	13.378	31.576	0.926	177.041	13743	1.063	0.94	0.979
28	KIZ_KAN623-10_2.tif:0008-0362	1.791	209.842	0	936	98.182	41.083	0.931	375.75	29168	1.016	0.984	0.982
29	KIZ_KAN623-10_2.tif:0009-0396	1.984	188.63	0	1081	55.148	44.924	0.932	374.217	29049	1.177	0.85	0.969
30	KIZ_KAN623-10_2.tif:0010-0454	1.649	102.984	0	617	24.614	51.535	0.906	169.814	13182	1.242	0.805	0.952
31	KIZ_KAN623-10_2.tif:0011-0465	1.353	42.21	0	162	122.812	52.83	0.891	57.094	4432	1.347	0.742	0.986
32	KIZ_KAN623-10_2.tif:0012-0578	2.177	247.112	0	2251	88.943	65.608	0.916	537.989	41762	1.098	0.911	0.966
33	KIZ_KAN623-10_2.tif:0013-0584	1.662	186.667	0	1632	144.45	66.325	0.819	310.205	24080	1.706	0.586	0.977
34	KIZ_KAN623-10_2.tif:0014-0586	1.829	164.049	0	990	110.836	66.517	0.892	300.092	23295	1.159	0.863	0.953
35	KIZ_KAN623-10_2.tif:0015-0657	1.275	183.394	0	844	47.211	74.575	0.905	233.89	18156	1.025	0.975	0.995
36	KIZ_KAN623-10_2.tif:0016-0695	1.997	135.942	0	855	8.93	78.854	0.861	271.442	21071	1.274	0.785	0.928
37	KIZ_KAN623-10_2.tif:0017-0772	1.945	175.45	0	1401	93.137	87.681	0.914	341.29	26493	1.133	0.883	0.947
38	KIZ_KAN623-10_2.tif:0018-0789	2.01	138.314	0	1278	124.606	89.586	0.889	277.96	21577	1.408	0.71	0.943
39	KIZ_KAN623-10_2.tif:0019-0839	1.816	183.291	0	1604	52.472	95.212	0.934	332.929	25844	1.127	0.888	0.959
40	KIZ_KAN623-10_2.tif:0020-0859	1.597	165.766	0	874	7.781	97.478	0.939	264.795	20555	1.091	0.917	0.973
41	KIZ_KAN623-10_2.tif:0021-0942	1.494	168.56	0	641	13.558	106.988	0.943	251.887	19553	1.024	0.976	0.979
42	KIZ_KAN623-10_2.tif:0022-1185	1.404	142.165	0	644	106.34	134.499	0.86	199.623	15496	1.338	0.747	0.952
43	KIZ_KAN623-10_2.tif:0023-1195	1.043	211.951	3	582	75.648	135.689	0.899	221.163	17168	1	1	1
44	KIZ_KAN623-10_3.tif:0001-0033	1.636	149.346	0	780	42.1	3.69	0.828	244.338	18967	1.444	0.693	0.951
45	KIZ_KAN623-10_3.tif:0002-0049	1.507	176.299	0	936	117.424	5.627	0.924	265.722	20627	1.084	0.923	0.987
46	KIZ_KAN623-10_3.tif:0003-0179	0.812	90.349	0	220	133.924	20.323	0.937	73.326	5692	1.039	0.963	0.992
47	KIZ_KAN623-10_3.tif:0004-0205	1.275	196.717	0	958	77.526	23.273	0.905	250.882	19475	1.025	0.975	0.995
48	KIZ_KAN623-10_3.tif:0005-0270	1.726	231.91	0	1764	107.945	30.637	0.922	400.329	31076	1.176	0.85	0.978
49	KIZ_KAN623-10_3.tif:0006-0300	1.623	202.071	0	1267	47.311	34.091	0.928	327.995	25461	1.094	0.914	0.977
50	KIZ_KAN623-10_3.tif:0007-0432	1.739	161.793	0	661	58.526	49.106	0.88	281.374	21842	1.237	0.809	0.971
51	KIZ_KAN623-10_3.tif:0008-0572	1.262	228.765	0	923	98.291	64.922	0.925	288.807	22419	1.052	0.95	0.99
52	KIZ_KAN623-10_3.tif:0009-0593	1.585	186.358	0	1030	45.326	67.337	0.906	295.287	22922	1.089	0.918	0.965
53	KIZ_KAN623-10_3.tif:0010-0667	1.224	177.863	11	480	122.061	75.772	0.926	217.671	16897	1.246	0.802	0.984
54	KIZ_KAN623-10_3.tif:0011-0678	1.327	139.709	0	469	20.596	76.943	0.93	185.376	14390	1.105	0.905	0.967
55	KIZ_KAN623-10_3.tif:0012-0747	1.507	136.256	0	893	42.265	84.785	0.886	205.369	15942	1.275	0.785	0.94
56	KIZ_KAN623-10_3.tif:0013-0937	1.494	184.414	0	718	99.442	106.332	0.864	275.577	21392	1.236	0.809	0.983
57	KIZ_KAN623-10_3.tif:0014-0973	1.829	175.507	0	1158	62.914	110.455	0.892	321.051	24922	1.246	0.802	0.963
58	KIZ_KAN623-10_3.tif:0015-1124	1.739	158.481	0	1140	89.295	127.622	0.929	275.616	21395	1.183	0.846	0.978
59	KIZ_KAN623-10_3.tif:0016-1207	1.481	158.035	0	876	61.687	137.051	0.935	234.122	18174	1.128	0.887	0.983
60	KIZ_KAN623-10_3.tif:0017-1240	1.353	125.552	0	701	113.143	140.809	0.891	169.827	13183	1.339	0.747	0.991
61	KIZ_KAN623-10_4.tif:0001-0051	1.61	185.856	0	599	125.423	5.843	0.92	299.28	23232	1.16	0.862	0.98
62	KIZ_KAN623-10_4.tif:0002-0054	1.894	154.701	0	896	91.19	6.116	0.9	292.955	22741	1.175	0.851	0.977
63	KIZ_KAN623-10_4.tif:0003-0057	2.138	177.343	0	1639	111.638	6.518	0.858	379.241	29439	1.266	0.79	0.965
64	KIZ_KAN623-10_4.tif:0004-0083	1.765	218.693	0	1422	60.446	9.468	0.943	385.965	29961	1.183	0.845	0.982
65	KIZ_KAN623-10_4.tif:0005-0134	2.151	167.521	0	1060	87.926	15.227	0.884	360.394	27976	1.295	0.772	0.968
66	KIZ_KAN623-10_4.tif:0006-0174	1.043	179.593	0	588	22.189	19.806	0.899	187.398	14547	1	1	1
67	KIZ_KAN623-10_4.tif:0007-0358	2.177	165.817	0	1323	68.127	40.722	0.886	360.999	28023	1.372	0.729	0.944
68	KIZ_KAN623-10_4.tif:0008-0372	1.237	111.135	0	272	122.798	42.231	0.936	137.441	10669	1.101	0.908	0.985
69	KIZ_KAN623-10_4.tif:0009-0434	1.829	163.958	0	1079	22.543	49.219	0.869	299.925	23282	1.3	0.769	0.963
70	KIZ_KAN623-10_4.tif:0010-0457	2.242	11.224	0	67	130.736	51.926	0.943	25.159	1953	1.075	0.93	0.983
71	KIZ_KAN623-10_4.tif:0011-0463	1.984	125.084	0	1173	100.888	52.618	0.864	248.151	19263	1.394	0.717	0.972
72	KIZ_KAN623-10_4.tif:0012-0637	1.932	173.72	0	1137	139.87	72.29	0.908	335.686	26058	1.224	0.817	0.949
73	KIZ_KAN623-10_4.tif:0013-0675	2.074	156.491	0	1020	58.998	76.602	0.895	324.568	25195	1.365	0.732	0.955
74	KIZ_KAN623-10_4.tif:0014-0679	1.043	203.605	0	492	88.814	77.123	0.899	212.454	16492	1	1	1
75	KIZ_KAN623-10_4.tif:0015-0691	1.932	118.32	0	1010	43.975	78.466	0.842	228.634	17748	1.452	0.689	0.955
76	KIZ_KAN623-10_4.tif:0016-0813	2.151	170.138	0	1577	57.149	92.296	0.896	366.023	28413	1.313	0.762	0.946
77	KIZ_KAN623-10_4.tif:0017-0835	1.829	171.979	0	1307	25.032	94.824	0.838	314.597	24421	1.239	0.807	0.916
78	KIZ_KAN623-10_4.tif:0018-0848	2.138	188.627	0	1457	78.184	96.327	0.9	403.369	31312	1.316	0.76	0.979
79	KIZ_KAN623-10_4.tif:0019-0952	2.267	117.739	0	1110	1.778	108.042	0.892	266.946	20722	1.387	0.721	0.936
80	KIZ_KAN623-10_4.tif:0020-0995	1.559	170.694	0	881	124.421	112.988	0.891	266.07	20654	1.154	0.866	0.957
81	KIZ_KAN623-10_4.tif:0021-1002	1.816	102.894	0	765	143.647	113.787	0.832	186.896	14508	1.379	0.725	0.919
82	KIZ_KAN623-10_4.tif:0022-1015	1.559	150.099	0	758	6.631	115.195	0.891	233.967	18162	1.187	0.842	0.957
83	KIZ_KAN623-10_4.tif:0023-1136	1.043	183.926	0	867	34.901	128.993	0.899	191.92	14898	1	1	1
84	KIZ_KAN623-10_4.tif:0024-1140	1.288	218.47	0	887	21.452	129.39	0.886	281.439	21847	1	1	1
85	KIZ_KAN623-10_4.tif:0025-1177	1.894	125.02	0	956	51.308	133.628	0.805	236.75	18378	1.453	0.688	0.942
86	KIZ_KAN623-10_4.tif:0026-1239	0.812	177.556	0	513	124.289	140.62	0.937	144.101	11186	1.039	0.963	0.992
										20733
87	KIZ_KAN623-11_1.tif:0001-0033	1.443	22.527	0	119	96.736	3.791	0.938	32.502	2523	1.139	0.878	0.974
88	KIZ_KAN623-11_1.tif:0002-0069	1.108	16.721	0	65	133.579	7.897	0.94	18.525	1438	1.16	0.862	0.983
89	KIZ_KAN623-11_1.tif:0003-0135	1.456	13.584	0	63	25.231	15.38	0.947	19.774	1535	1.036	0.966	0.97
90	KIZ_KAN623-11_1.tif:0004-0261	1.494	20.224	0	76	39.191	29.692	0.916	30.222	2346	1.054	0.949	0.983
91	KIZ_KAN623-11_1.tif:0005-0305	1.121	24.874	0	97	100.896	34.669	0.951	27.877	2164	1.114	0.897	0.983
92	KIZ_KAN623-11_1.tif:0006-0576	1.353	11.829	0	50	93.936	65.372	0.948	16	1242	1.12	0.893	0.981
93	KIZ_KAN623-11_1.tif:0007-0599	1.636	18.598	0	127	99.317	68.047	0.935	30.428	2362	1.088	0.919	0.981
94	KIZ_KAN623-11_1.tif:0008-0625	1.481	18.174	0	92	16.331	70.924	0.908	26.924	2090	1.211	0.826	0.979
95	KIZ_KAN623-11_1.tif:0009-0729	0.812	21.429	0	63	49.946	82.735	0.937	17.391	1350	1.039	0.963	0.992
96	KIZ_KAN623-11_1.tif:0010-0730	0.721	12.179	0	45	90.743	82.855	0.92	8.786	682	1.143	0.875	1
97	KIZ_KAN623-11_1.tif:0011-0747	1.469	22.018	0	101	125.191	84.785	0.874	32.334	2510	1.261	0.793	0.974
98	KIZ_KAN623-11_1.tif:0012-0826	1.778	12.109	0	58	41.942	93.729	0.914	21.526	1671	1.162	0.86	0.945
99	KIZ_KAN623-11_1.tif:0013-0830	1.572	13.795	0	113	98.868	94.253	0.98	21.681	1683	1.096	0.912	0.972
100	KIZ_KAN623-11_1.tif:0014-0901	1.314	19.824	0	107	137.002	102.348	0.921	26.048	2022	1.108	0.902	0.962
101	KIZ_KAN623-11_1.tif:0015-1048	1.211	18.149	0	78	100.903	118.959	0.947	21.977	1706	1.098	0.911	0.974
102	KIZ_KAN623-11_1.tif:0016-1186	1.481	14.313	0	120	83.347	134.675	0.935	21.204	1646	1.078	0.927	0.979
103	KIZ_KAN623-11_1.tif:0017-1191	1.778	15.138	0	95	125.409	135.17	0.95	26.911	2089	1.033	0.968	0.982
104	KIZ_KAN623-11_2.tif:0001-0056	0.992	7.779	0	55	97.78	6.402	0.951	7.716	599	1.06	0.944	0.975
105	KIZ_KAN623-11_2.tif:0002-0113	1.507	12.214	0	105	39.545	12.891	0.924	18.409	1429	1.006	0.994	0.983
106	KIZ_KAN623-11_2.tif:0003-0141	1.366	7.755	0	63	143.464	16.06	0.957	10.589	822	1.099	0.91	0.981
107	KIZ_KAN623-11_2.tif:0004-0289	1.752	13.434	0	104	52.677	32.784	0.936	23.536	1827	1.06	0.944	0.975
108	KIZ_KAN623-11_2.tif:0005-0329	1.7	13.409	0	54	17.772	37.403	0.934	22.802	1770	1.187	0.842	0.967
109	KIZ_KAN623-11_2.tif:0006-0337	1.031	6.062	0	42	117.535	38.301	0.919	6.248	485	1.031	0.97	0.994
110	KIZ_KAN623-11_2.tif:0007-0489	0.721	7.857	0	33	63.049	55.502	0.92	5.668	440	1.143	0.875	1
111	KIZ_KAN623-11_2.tif:0008-0526	1.327	12.039	0	88	17.88	59.706	0.93	15.974	1240	1.134	0.882	0.967
112	KIZ_KAN623-11_2.tif:0009-0534	1.134	19.193	0	86	138.754	60.609	0.87	21.758	1689	1.375	0.727	1
113	KIZ_KAN623-11_2.tif:0010-0642	0.631	8.082	0	28	97.213	72.924	0.935	5.101	396	1	1	1
114	KIZ_KAN623-11_2.tif:0011-0875	1.301	9.98	0	101	111.924	99.358	0.912	12.985	1008	1.233	0.811	0.967
115	KIZ_KAN623-11_2.tif:0012-0902	1.327	8.155	0	93	50.294	102.422	0.93	10.821	840	1.191	0.84	0.972
116	KIZ_KAN623-11_2.tif:0013-0938	1.353	5.495	0	38	135.409	106.514	0.948	7.433	577	1.096	0.913	0.977
117	KIZ_KAN623-11_2.tif:0014-1048	0.979	15.197	0	65	131.774	118.948	0.905	14.879	1155	1.299	0.77	0.974
118	KIZ_KAN623-11_2.tif:0015-1113	0.812	6.698	0	42	105.788	126.319	0.937	5.436	422	1.039	0.963	0.992
119	KIZ_KAN623-11_2.tif:0016-1205	1.121	13.103	0	67	64.019	136.809	0.919	14.686	1140	1.121	0.892	0.983
120	KIZ_KAN623-11_2.tif:0017-1222	0.889	4.739	0	28	15.838	138.691	0.933	4.212	327	1.172	0.853	0.979
121	KIZ_KAN623-11_3.tif:0001-0276	1.378	14.981	0	92	81.09	31.331	0.936	20.65	1603	1.102	0.907	0.986
122	KIZ_KAN623-11_3.tif:0002-0347	1.211	22.681	0	133	99.661	39.385	0.947	27.465	2132	1.093	0.915	0.969
123	KIZ_KAN623-11_3.tif:0003-0379	0.992	29.662	0	124	51.937	43.073	0.951	29.423	2284	1.06	0.944	0.975
124	KIZ_KAN623-11_3.tif:0004-0445	0.631	25.571	0	52	112.762	50.564	0.935	16.141	1253	1	1	1
125	KIZ_KAN623-11_3.tif:0005-0452	1.494	15.233	0	70	78.542	51.302	0.943	22.763	1767	1.198	0.835	0.983
126	KIZ_KAN623-11_3.tif:0006-0600	0.915	20.028	0	94	22.296	68.106	0.924	18.319	1422	1.13	0.885	0.993
127	KIZ_KAN623-11_3.tif:0007-0682	1.675	17.138	0	111	28.337	77.424	0.973	28.702	2228	1.056	0.947	0.959
128	KIZ_KAN623-11_3.tif:0008-0708	0.824	24.641	0	95	39.952	80.358	0.914	20.315	1577	1	1	1
129	KIZ_KAN623-11_3.tif:0009-0758	0.721	9.964	0	62	109.357	86.033	0.92	7.188	558	1.143	0.875	1
130	KIZ_KAN623-11_3.tif:0010-0804	1.211	22.894	0	77	137.736	91.306	0.917	27.723	2152	1.233	0.811	0.974
131	KIZ_KAN623-11_3.tif:0011-0858	1.572	18.918	0	105	31.366	97.397	0.898	29.732	2308	1.11	0.901	0.964
132	KIZ_KAN623-11_3.tif:0012-0946	1.713	14.624	0	87	139.382	107.383	0.968	25.056	1945	1.049	0.953	0.971
133	KIZ_KAN623-11_3.tif:0013-1014	0.799	19.661	0	71	102.037	115.089	0.96	15.703	1219	1.081	0.925	0.984
134	KIZ_KAN623-11_3.tif:0014-1086	1.456	11.168	0	57	144.305	123.337	0.947	16.257	1262	1.043	0.959	0.974
135	KIZ_KAN623-11_3.tif:0015-1179	1.262	14.51	0	98	53.005	133.817	0.925	18.319	1422	1.052	0.95	0.99
136	KIZ_KAN623-11_4.tif:0001-0112	1.443	18.402	0	104	33.071	12.774	0.967	26.55	2061	1.02	0.981	0.97
137	KIZ_KAN623-11_4.tif:0002-0115	0.799	30.613	0	136	95	13.053	0.96	24.451	1898	1.081	0.925	0.984
138	KIZ_KAN623-11_4.tif:0003-0347	1.134	20.42	0	108	101.923	39.452	0.93	23.149	1797	1.111	0.9	0.989
139	KIZ_KAN623-11_4.tif:0004-0370	0.915	22.38	0	92	59.424	41.989	0.924	20.47	1589	1.13	0.885	0.993
140	KIZ_KAN623-11_4.tif:0005-0374	0.915	24.803	0	81	130.008	42.443	0.924	22.686	1761	1.13	0.885	0.993
141	KIZ_KAN623-11_4.tif:0006-0478	1.134	25.136	0	116	133.715	54.319	0.899	28.496	2212	1.117	0.895	0.989
142	KIZ_KAN623-11_4.tif:0007-0513	1.198	17.806	0	80	71.623	58.22	0.969	21.333	1656	1.07	0.934	0.969
143	KIZ_KAN623-11_4.tif:0008-0702	1.507	10.915	0	49	69.57	79.681	0.924	16.451	1277	1.2	0.833	0.987
144	KIZ_KAN623-11_4.tif:0009-0751	1.211	15.83	0	60	101.354	85.219	0.947	19.169	1488	1.051	0.951	0.974
145	KIZ_KAN623-11_4.tif:0010-0937	1.275	21.091	0	109	130.537	106.333	0.829	26.898	2088	1.486	0.673	0.904
146	KIZ_KAN623-11_4.tif:0011-0983	1.443	12.429	0	56	27.292	111.64	0.938	17.932	1392	1.057	0.946	0.966
147	KIZ_KAN623-11_4.tif:0012-1185	0.902	21.971	0	120	37.625	134.498	0.947	19.813	1538	1.146	0.873	0.986
148	KIZ_KAN623-11_4.tif:0013-1202	0.915	22.606	0	108	81.272	136.477	0.924	20.676	1605	1.13	0.885	0.993
149	KIZ_KAN623-11_4.tif:0014-1259	0.928	13.931	0	52	123.375	142.953	0.903	12.921	1003	1.125	0.889	1
										1519.4
150	KIZ_KAN623-12_1.tif:0001-0005	0.451	22.314	0	83	25.808	0.563	0.826	10.061	781	2.235	0.447	0.986
151	KIZ_KAN623-12_1.tif:0002-0017	1.881	132.027	0	611	74.789	1.985	0.917	248.318	19276	1.161	0.861	0.973
152	KIZ_KAN623-12_1.tif:0003-0137	1.842	120.007	0	1137	114.075	15.532	0.803	221.072	17161	1.767	0.566	0.953
153	KIZ_KAN623-12_1.tif:0004-0172	1.378	160.664	0	843	38.197	19.517	0.908	221.459	17191	1.127	0.887	0.986
154	KIZ_KAN623-12_1.tif:0005-0187	1.958	144.77	0	1417	7.242	21.244	0.853	283.474	22005	1.651	0.606	0.977
155	KIZ_KAN623-12_1.tif:0006-0272	1.726	180.754	0	868	128.265	30.863	0.948	312.021	24221	1.032	0.969	0.971
156	KIZ_KAN623-12_1.tif:0007-0421	2.023	171.223	0	1609	51.44	47.78	0.904	346.301	26882	1.209	0.827	0.969
157	KIZ_KAN623-12_1.tif:0008-0541	0.631	41.408	0	131	143.861	61.46	0.935	26.138	2029	1	1	1
158	KIZ_KAN623-12_1.tif:0009-0552	1.842	163.399	0	1121	93.699	62.652	0.898	301.007	23366	1.325	0.755	0.966
159	KIZ_KAN623-12_1.tif:0010-0555	2.01	144.442	0	1209	77.542	62.98	0.876	290.276	22533	1.244	0.804	0.963
160	KIZ_KAN623-12_1.tif:0011-0624	1.971	96.712	0	473	20.801	70.787	0.903	190.619	14797	1.268	0.789	0.962
161	KIZ_KAN623-12_1.tif:0012-0671	1.765	129.745	0	555	117.256	76.146	0.893	228.982	17775	1.121	0.892	0.979
162	KIZ_KAN623-12_1.tif:0013-0771	1.662	140.109	0	941	48.461	87.571	0.874	232.834	18074	1.3	0.769	0.996
163	KIZ_KAN623-12_1.tif:0014-0845	1.366	119.519	0	465	94.943	95.896	0.899	163.205	12669	1.331	0.751	0.991
164	KIZ_KAN623-12_1.tif:0015-0869	1.378	161.963	0	786	70.586	98.704	0.908	223.249	17330	1.104	0.905	0.986
165	KIZ_KAN623-12_1.tif:0016-0929	1.275	182.838	0	845	3.916	105.498	0.877	233.182	18101	1.222	0.818	1
166	KIZ_KAN623-12_1.tif:0017-0950	1.984	132.714	0	1043	122.023	107.787	0.909	263.287	20438	1.188	0.842	0.969
167	KIZ_KAN623-12_1.tif:0018-0950	1.275	180.061	0	820	142.159	107.882	0.877	229.639	17826	1.222	0.818	1
168	KIZ_KAN623-12_1.tif:0019-1115	1.7	121.167	0	758	40.107	126.542	0.808	206.039	15994	1.384	0.723	0.917
169	KIZ_KAN623-12_1.tif:0020-1156	0.631	55.327	0	164	101.753	131.263	0.935	34.924	2711	1	1	1
170	KIZ_KAN623-12_2.tif:0001-0106	2.486	112.938	0	1099	78.322	12.038	0.884	280.794	21797	1.341	0.746	0.939
171	KIZ_KAN623-12_2.tif:0002-0126	2.422	109.601	0	1335	23.973	14.316	0.789	265.439	20605	1.706	0.586	0.931
172	KIZ_KAN623-12_2.tif:0003-0214	1.623	143.667	0	1087	6.933	24.291	0.844	233.195	18102	1.558	0.642	0.955
173	KIZ_KAN623-12_2.tif:0004-0239	1.108	127.791	0	403	138.696	27.173	0.94	141.576	10990	1.13	0.885	0.977
174	KIZ_KAN623-12_2.tif:0005-0267	1.018	142.582	0	468	57.147	30.361	0.941	145.106	11264	1.064	0.94	0.988
175	KIZ_KAN623-12_2.tif:0006-0449	1.932	118.38	0	953	25.618	51.034	0.908	228.75	17757	1.247	0.802	0.962
176	KIZ_KAN623-12_2.tif:0007-0492	2.242	146.575	0	1096	75.75	55.794	0.85	328.549	25504	1.421	0.704	0.956
177	KIZ_KAN623-12_2.tif:0008-0666	1.971	125.418	0	1213	47.225	75.64	0.871	247.198	19189	1.257	0.795	0.916
178	KIZ_KAN623-12_2.tif:0009-0667	1.559	154.025	0	691	68.184	75.719	0.842	240.087	18637	1.333	0.75	0.964
179	KIZ_KAN623-12_2.tif:0010-0779	0.631	17.51	0	50	107.314	88.473	0.935	11.053	858	1	1	1
180	KIZ_KAN623-12_2.tif:0011-0829	1.275	157.162	0	833	42.165	94.148	0.877	200.435	15559	1.222	0.818	1
181	KIZ_KAN623-12_2.tif:0012-0978	2.744	121.925	0	1136	93.381	111.056	0.842	334.552	25970	1.344	0.744	0.922
182	KIZ_KAN623-12_2.tif:0013-1016	2.267	108.881	0	723	123.527	115.344	0.84	246.863	19163	1.611	0.621	0.972
183	KIZ_KAN623-12_3.tif:0001-0048	1.984	124.688	0	913	82.545	5.509	0.856	247.365	19202	1.325	0.755	0.931
184	KIZ_KAN623-12_3.tif:0002-0115	2.087	158.537	0	1574	53.184	13.107	0.81	330.855	25683	1.419	0.705	0.908
185	KIZ_KAN623-12_3.tif:0003-0163	2.306	103.709	0	1011	19.619	18.579	0.866	239.146	18564	1.419	0.705	0.937
186	KIZ_KAN623-12_3.tif:0004-0194	1.108	61.407	0	326	87.746	22.065	0.94	68.031	5281	1.116	0.896	0.977
187	KIZ_KAN623-12_3.tif:0005-0376	2.229	108.873	0	932	39.466	42.731	0.845	242.637	18835	1.417	0.706	0.951
188	KIZ_KAN623-12_3.tif:0006-0385	2.319	105.828	0	1160	96.305	43.698	0.814	245.394	19049	1.6	0.625	0.942
189	KIZ_KAN623-12_3.tif:0007-0475	2.422	113.787	0	1209	79.89	53.993	0.831	275.577	21392	1.698	0.589	0.974
190	KIZ_KAN623-12_3.tif:0008-0489	0.902	6.1	0	42	132.114	55.558	0.947	5.501	427	1.146	0.873	0.986
191	KIZ_KAN623-12_3.tif:0009-0494	0.824	93.266	0	296	13.053	56.069	0.914	76.894	5969	1	1	1
192	KIZ_KAN623-12_3.tif:0010-0581	1.533	131.941	0	943	117.765	66.01	0.887	202.264	15701	1.04	0.962	0.992
193	KIZ_KAN623-12_3.tif:0011-0629	1.198	101.323	0	409	54.162	71.369	0.937	121.389	9423	1.168	0.856	0.979
194	KIZ_KAN623-12_3.tif:0012-0839	0.631	42.694	0	231	37.171	95.283	0.935	26.95	2092	1	1	1
195	KIZ_KAN623-12_3.tif:0013-0905	2.023	113.752	0	608	92.431	102.747	0.803	230.064	17859	1.538	0.65	0.91
196	KIZ_KAN623-12_3.tif:0014-0949	2.718	113.962	0	1428	111.305	107.675	0.817	309.767	24046	1.525	0.656	0.925
197	KIZ_KAN623-12_3.tif:0015-1009	1.082	61.06	0	620	20.092	114.58	0.951	66.073	5129	1.213	0.825	0.971
198	KIZ_KAN623-12_3.tif:0016-1096	0.992	20.065	0	56	119.005	124.453	0.987	19.903	1545	1	1	0.975
199	KIZ_KAN623-12_3.tif:0017-1100	2.254	112.577	0	845	84.981	124.874	0.809	253.793	19701	1.507	0.663	0.919
200	KIZ_KAN623-12_3.tif:0018-1201	2.048	88.044	0	804	25.977	136.33	0.802	180.339	13999	1.758	0.569	0.97
201	KIZ_KAN623-12_4.tif:0001-0047	1.726	145.075	0	619	132.508	5.386	0.922	250.431	19440	1.215	0.823	0.971
202	KIZ_KAN623-12_4.tif:0002-0102	1.868	160.103	0	974	84.351	11.575	0.878	299.061	23215	1.394	0.718	0.945
203	KIZ_KAN623-12_4.tif:0003-0201	2.345	110.275	0	884	13.151	22.834	0.889	258.547	20070	1.377	0.726	0.973
204	KIZ_KAN623-12_4.tif:0004-0221	1.391	188.898	0	883	115.997	25.14	0.916	262.811	20401	1.112	0.9	0.991
205	KIZ_KAN623-12_4.tif:0005-0300	1.275	177.97	0	835	70.716	34.055	0.905	226.972	17619	1.025	0.975	0.995
206	KIZ_KAN623-12_4.tif:0006-0360	2.126	131.17	0	582	96.473	40.886	0.853	278.811	21643	1.505	0.664	0.971
207	KIZ_KAN623-12_4.tif:0007-0437	1.159	187.922	0	1097	2.043	49.656	0.89	217.878	16913	1.111	0.9	1
208	KIZ_KAN623-12_4.tif:0008-0502	0.902	63.771	0	265	71.108	56.966	0.947	57.506	4464	1.125	0.889	0.986
209	KIZ_KAN623-12_4.tif:0009-0505	1.662	100.946	0	875	140.005	57.325	0.854	167.753	13022	1.475	0.678	0.928
210	KIZ_KAN623-12_4.tif:0010-0566	1.868	231.055	0	1692	93.778	64.275	0.911	431.594	33503	1.196	0.836	0.973
211	KIZ_KAN623-12_4.tif:0011-0586	2.061	112.531	0	897	58.687	66.516	0.781	231.945	18005	1.608	0.622	0.909
212	KIZ_KAN623-12_4.tif:0012-0647	1.778	124.014	0	854	33.557	73.493	0.857	220.467	17114	1.477	0.677	0.929
213	KIZ_KAN623-12_4.tif:0013-0712	1.945	160.841	0	896	22.745	80.856	0.891	312.871	24287	1.177	0.85	0.947
214	KIZ_KAN623-12_4.tif:0014-0839	1.043	197.926	0	620	103.228	95.283	0.899	206.528	16032	1	1	1
215	KIZ_KAN623-12_4.tif:0015-0876	1.7	148.205	0	1009	132.943	99.398	0.838	252.015	19563	1.445	0.692	0.971
216	KIZ_KAN623-12_4.tif:0016-0896	1.726	122.94	0	657	33.785	101.713	0.864	212.222	16474	1.235	0.81	0.924
217	KIZ_KAN623-12_4.tif:0017-0943	1.636	182.039	0	1391	18.796	107.018	0.909	297.825	23119	1.132	0.883	0.981
218	KIZ_KAN623-12_4.tif:0018-0940	0.631	111.224	0	409	22.303	106.747	0.935	70.208	5450	1	1	1
219	KIZ_KAN623-12_4.tif:0019-0950	2.164	185.327	0	1703	81.239	107.836	0.933	401.089	31135	1.114	0.897	0.971
220	KIZ_KAN623-12_4.tif:0020-0968	2.473	109.177	0	1073	55.437	109.888	0.849	270.038	20962	1.494	0.669	0.972
221	KIZ_KAN623-12_4.tif:0021-1097	1.159	211.367	0	1036	109.074	124.566	0.89	245.059	19023	1.111	0.9	1
222	KIZ_KAN623-12_4.tif:0022-1111	1.945	131.53	0	1075	121.189	126.106	0.799	255.854	19861	1.524	0.656	0.921
223	KIZ_KAN623-12_4.tif:0023-1168	0.631	31.776	0	132	69.405	132.625	0.935	20.058	1557	1	1	1
224	KIZ_KAN623-12_4.tif:0024-1204	1.043	183.358	0	949	27.524	136.711	0.899	191.327	14852	1	1	1
										16509
225	KIZ_KAN623-13_1.tif:0001-0009	1.61	181.64	0	962	49.565	1.012	0.92	292.492	22705	1.139	0.878	0.977
226	KIZ_KAN623-13_1.tif:0002-0046	1.043	194.198	0	536	109.357	5.278	0.899	202.638	15730	1	1	1
227	KIZ_KAN623-13_1.tif:0003-0089	2.473	160.385	0	1889	25.409	10.141	0.816	396.696	30794	1.455	0.687	0.914
228	KIZ_KAN623-13_1.tif:0004-0119	1.469	68.763	0	691	66.853	13.516	0.955	100.984	7839	1.196	0.836	0.974
229	KIZ_KAN623-13_1.tif:0005-0185	1.043	240.704	0	628	138.413	21.054	0.899	251.165	19497	1	1	1
230	KIZ_KAN623-13_1.tif:0006-0234	2.035	134.905	0	775	128.245	26.647	0.79	274.585	21315	1.771	0.565	0.929
231	KIZ_KAN623-13_1.tif:0007-0261	2.576	123.205	0	1097	88.888	29.635	0.759	317.432	24641	1.962	0.51	0.926
232	KIZ_KAN623-13_1.tif:0008-0270	1.932	128.447	0	862	101.98	30.671	0.854	248.202	19267	1.479	0.676	0.923
233	KIZ_KAN623-13_1.tif:0009-0379	2.087	150.92	0	1780	143.847	43.117	0.837	314.958	24449	1.526	0.655	0.964
234	KIZ_KAN623-13_1.tif:0010-0391	2.087	122.377	0	710	6.883	44.383	0.766	255.391	19825	1.557	0.642	0.878
235	KIZ_KAN623-13_1.tif:0011-0394	2.461	147.487	0	1859	106.348	44.765	0.812	362.893	28170	1.502	0.666	0.907
236	KIZ_KAN623-13_1.tif:0012-0440	1.816	125.851	0	587	49.316	49.997	0.792	228.596	17745	1.629	0.614	0.922
237	KIZ_KAN623-13_1.tif:0013-0480	1.288	239.57	0	1386	42.676	54.48	0.886	308.62	23957	1	1	1
238	KIZ_KAN623-13_1.tif:0014-0525	1.391	174.667	0	855	75.431	59.579	0.889	243.011	18864	1.105	0.905	0.991
239	KIZ_KAN623-13_1.tif:0015-0562	2.074	167.435	0	1399	121.208	63.863	0.895	347.267	26957	1.307	0.765	0.955
240	KIZ_KAN623-13_1.tif:0016-0616	2.074	166.925	0	1125	100.349	69.98	0.895	346.211	26875	1.249	0.801	0.955
241	KIZ_KAN623-13_1.tif:0017-0661	1.121	121.736	0	267	85.063	75.028	0.919	136.436	10591	1.146	0.872	0.983
242	KIZ_KAN623-13_1.tif:0018-0686	1.391	217.5	0	1247	57.772	77.918	0.916	302.604	23490	1.112	0.9	0.991
243	KIZ_KAN623-13_1.tif:0019-0769	2.499	143.727	0	1755	110.512	87.342	0.721	359.196	27883	1.651	0.606	0.874
244	KIZ_KAN623-13_1.tif:0020-0840	1.804	158.464	0	1133	55.489	95.308	0.835	285.793	22185	1.55	0.645	0.976
245	KIZ_KAN623-13_1.tif:0021-0851	0.631	22.898	0	100	11.18	96.645	0.935	14.454	1122	1	1	1
246	KIZ_KAN623-13_1.tif:0022-0903	2.254	127.337	0	1067	31.591	102.479	0.846	287.068	22284	1.358	0.736	0.923
247	KIZ_KAN623-13_1.tif:0023-0919	2.177	221.118	0	1761	86.029	104.359	0.886	481.397	37369	1.198	0.835	0.936
248	KIZ_KAN623-13_1.tif:0024-1056	2.254	139.04	0	1151	105.04	119.954	0.917	313.451	24332	1.239	0.807	0.959
249	KIZ_KAN623-13_1.tif:0025-1072	0.992	81.662	0	218	114.238	121.729	0.987	81.004	6288	1	1	0.975
250	KIZ_KAN623-13_1.tif:0026-1264	1.275	189.111	0	979	19.125	143.521	0.877	241.182	18722	1.222	0.818	1
251	KIZ_KAN623-13_2.tif:0001-0055	1.726	187.873	0	1357	93.6	6.293	0.922	324.311	25175	1.199	0.834	0.975
252	KIZ_KAN623-13_2.tif:0002-0128	2.345	159.775	0	1536	24.754	14.58	0.86	374.603	29079	1.31	0.763	0.948
253	KIZ_KAN623-13_2.tif:0003-0150	2.254	115.577	0	1251	64.22	17	0.767	260.556	20226	1.57	0.637	0.888
254	KIZ_KAN623-13_2.tif:0004-0168	1.726	229.172	0	1356	42.912	19.067	0.948	395.601	30709	1.011	0.989	0.968
255	KIZ_KAN623-13_2.tif:0005-0200	2.525	116.622	0	1161	117.126	22.755	0.798	294.463	22858	1.611	0.621	0.916
256	KIZ_KAN623-13_2.tif:0006-0322	2.306	158.575	0	1043	135.107	36.537	0.835	365.663	28385	1.387	0.721	0.968
257	KIZ_KAN623-13_2.tif:0007-0337	1.907	140.027	0	815	72.543	38.324	0.723	266.972	20724	1.603	0.624	0.876
258	KIZ_KAN623-13_2.tif:0008-0428	1.52	202.483	0	1148	41.201	48.578	0.905	307.796	23893	1.205	0.83	0.992
259	KIZ_KAN623-13_2.tif:0009-0440	2.254	152.36	0	1136	108.801	50.032	0.875	343.479	26663	1.212	0.825	0.954
260	KIZ_KAN623-13_2.tif:0010-0510	1.159	183.978	0	787	34.618	57.942	0.89	213.304	16558	1.111	0.9	1
261	KIZ_KAN623-13_2.tif:0011-0576	2.023	104.688	0	964	9.798	65.41	0.872	211.733	16436	1.409	0.709	0.943
262	KIZ_KAN623-13_2.tif:0012-0591	1.095	9.812	0	45	23.263	67.121	0.929	10.744	834	1.114	0.897	0.971
263	KIZ_KAN623-13_2.tif:0013-0650	1.739	151.067	0	1278	47.822	73.788	0.777	262.721	20394	1.481	0.675	0.891
264	KIZ_KAN623-13_2.tif:0014-0703	1.649	232.359	0	1669	28.035	79.847	0.942	383.144	29742	1.09	0.917	0.985
265	KIZ_KAN623-13_2.tif:0015-0742	1.688	187.244	0	1245	140.241	84.276	0.953	315.989	24529	1.266	0.79	0.97
266	KIZ_KAN623-13_2.tif:0016-0760	1.134	181.943	0	727	71.553	86.272	0.93	206.258	16011	1.117	0.895	0.989
267	KIZ_KAN623-13_2.tif:0017-0780	1.919	114.389	0	1047	89.668	88.575	0.889	219.565	17044	1.097	0.912	0.977
268	KIZ_KAN623-13_2.tif:0018-0792	2.319	132.728	0	792	99.389	89.888	0.871	307.77	23891	1.553	0.644	0.952
269	KIZ_KAN623-13_2.tif:0019-0831	1.262	206.418	0	585	32.802	94.319	0.925	260.595	20229	1.052	0.95	0.99
270	KIZ_KAN623-13_2.tif:0020-0932	1.881	146.514	0	942	131.504	105.805	0.931	275.564	21391	1.16	0.862	0.948
271	KIZ_KAN623-13_2.tif:0021-0957	1.765	151.701	0	1029	42.228	108.559	0.817	267.732	20783	1.332	0.751	0.942
272	KIZ_KAN623-13_2.tif:0022-1032	1.804	188.243	0	1585	65.368	117.179	0.857	339.499	26354	1.187	0.843	0.946
273	KIZ_KAN623-13_2.tif:0023-1129	0.915	102.887	0	248	111.974	128.136	0.924	94.105	7305	1.13	0.885	0.993
274	KIZ_KAN623-13_2.tif:0024-1178	0.915	97.915	0	304	5.725	133.709	0.924	89.557	6952	1.13	0.885	0.993
275	KIZ_KAN623-13_2.tif:0025-1255	0.631	132.327	0	263	102.434	142.499	0.935	83.529	6484	1	1	1
276	KIZ_KAN623-13_3.tif:0001-0075	2.216	169.762	0	1782	116.59	8.578	0.777	376.149	29199	1.517	0.659	0.908
277	KIZ_KAN623-13_3.tif:0002-0096	1.391	209.074	0	969	61.12	10.896	0.916	290.881	22580	1.112	0.9	0.991
278	KIZ_KAN623-13_3.tif:0003-0292	2.087	182.765	0	1257	80.254	33.157	0.932	381.418	29608	1.168	0.856	0.985
279	KIZ_KAN623-13_3.tif:0004-0330	2.293	139.68	0	897	54.558	37.458	0.946	320.291	24863	1.297	0.771	0.954
280	KIZ_KAN623-13_3.tif:0005-0337	2.177	127.598	0	1420	27.865	38.329	0.886	277.793	21564	1.289	0.776	0.947
281	KIZ_KAN623-13_3.tif:0006-0353	2.216	177.826	0	1507	107.009	40.046	0.892	394.017	30586	1.256	0.796	0.93
282	KIZ_KAN623-13_3.tif:0007-0423	1.958	143.625	0	889	126.777	48.035	0.833	281.232	21831	1.396	0.716	0.959
283	KIZ_KAN623-13_3.tif:0008-0553	1.417	25.209	0	88	18.168	62.79	0.95	35.722	2773	1.209	0.827	0.965
284	KIZ_KAN623-13_3.tif:0009-0587	1.623	175.056	0	1070	6.688	66.662	0.877	284.144	22057	1.311	0.763	0.984
285	KIZ_KAN623-13_3.tif:0010-0653	1.52	204.924	0	1158	72.413	74.116	0.905	311.506	24181	1.205	0.83	0.992
286	KIZ_KAN623-13_3.tif:0011-0732	1.945	185.669	0	1656	133.49	83.143	0.878	361.167	28036	1.275	0.785	0.99
287	KIZ_KAN623-13_3.tif:0012-0741	2.357	143.049	0	1340	27.898	84.111	0.778	337.232	26178	1.683	0.594	0.897
288	KIZ_KAN623-13_3.tif:0013-0841	1.894	162.524	0	848	109.126	95.415	0.805	307.77	23891	1.681	0.595	0.964
289	KIZ_KAN623-13_3.tif:0014-0968	1.636	148.52	0	855	37.532	109.881	0.909	242.985	18862	1.105	0.905	0.981
290	KIZ_KAN623-13_3.tif:0015-1065	1.52	185.085	0	896	46.473	120.929	0.931	281.348	21840	1.022	0.979	0.987
291	KIZ_KAN623-13_3.tif:0016-1077	1.932	163.647	0	1104	50.548	122.267	0.908	316.221	24547	1.2	0.833	0.952
292	KIZ_KAN623-13_3.tif:0017-1083	2.087	159.043	0	1018	104.803	122.984	0.837	331.911	25765	1.514	0.66	0.961
293	KIZ_KAN623-13_3.tif:0018-1101	2.538	138.893	0	1665	83.556	125.031	0.819	352.484	27362	1.639	0.61	0.936
294	KIZ_KAN623-13_3.tif:0019-1266	1.275	187.354	0	1223	0.913	143.686	0.905	238.94	18548	1.025	0.975	0.995
295	KIZ_KAN623-13_4.tif:0001-0047	1.945	128.603	0	1018	117.552	5.324	0.86	250.16	19419	1.481	0.675	0.924
296	KIZ_KAN623-13_4.tif:0002-0096	1.572	61.893	0	160	54.821	10.975	0.951	97.274	7551	1.075	0.93	0.968
297	KIZ_KAN623-13_4.tif:0003-0181	1.481	171.304	0	1192	24.311	20.554	0.882	253.78	19700	1.23	0.813	0.979
298	KIZ_KAN623-13_4.tif:0004-0218	2.164	210.893	0	1408	22.332	24.743	0.911	456.418	35430	1.267	0.789	0.971
299	KIZ_KAN623-13_4.tif:0005-0276	0.631	204.653	33	424	143.18	31.383	0.935	129.183	10028	1	1	1
300	KIZ_KAN623-13_4.tif:0006-0289	0.812	68.222	0	361	27.473	32.808	0.937	55.368	4298	1.039	0.963	0.992
301	KIZ_KAN623-13_4.tif:0007-0361	1.623	220.54	0	1436	36.369	40.982	0.902	357.972	27788	1.155	0.866	0.981
302	KIZ_KAN623-13_4.tif:0008-0426	0.812	76.524	0	279	11.81	48.357	0.937	62.105	4821	1.039	0.963	0.992
303	KIZ_KAN623-13_4.tif:0009-0435	1.713	173.256	0	1383	94.759	49.375	0.941	296.846	23043	1.015	0.985	0.967
304	KIZ_KAN623-13_4.tif:0010-0460	2.19	114.129	0	703	111.699	52.27	0.811	249.941	19402	1.658	0.603	0.952
305	KIZ_KAN623-13_4.tif:0011-0525	1.546	146.692	0	623	53.245	59.648	0.909	226.766	17603	1.167	0.857	0.952
306	KIZ_KAN623-13_4.tif:0012-0592	0.721	93.768	0	273	135.86	67.249	0.92	67.645	5251	1.143	0.875	1
307	KIZ_KAN623-13_4.tif:0013-0617	2.1	123.368	0	891	55.246	70.086	0.854	259.049	20109	1.368	0.731	0.921
308	KIZ_KAN623-13_4.tif:0014-0619	2.383	128.292	0	880	98.404	70.251	0.829	305.747	23734	1.461	0.684	0.918
309	KIZ_KAN623-13_4.tif:0015-0708	0.902	17.857	0	87	141.989	80.415	0.878	16.103	1250	1.429	0.7	1
310	KIZ_KAN623-13_4.tif:0016-0738	1.61	194.568	0	1451	116.407	83.765	0.92	313.309	24321	1.098	0.91	0.973
311	KIZ_KAN623-13_4.tif:0017-0761	1.443	5.812	0	40	86.175	86.381	0.911	8.386	651	1.223	0.818	0.97
312	KIZ_KAN623-13_4.tif:0018-0855	2.435	125.122	0	1338	68.703	97.067	0.81	304.639	23648	1.656	0.604	0.938
313	KIZ_KAN623-13_4.tif:0019-0860	0.631	31.592	0	123	21.281	97.667	0.935	19.942	1548	1	1	1
314	KIZ_KAN623-13_4.tif:0020-0886	2.242	172.362	0	1595	94.689	100.598	0.769	386.352	29991	1.535	0.651	0.921
315	KIZ_KAN623-13_4.tif:0021-0919	2.499	139.284	0	1337	86.885	104.415	0.773	348.091	27021	1.581	0.632	0.909
316	KIZ_KAN623-13_4.tif:0022-1027	0.902	131.971	0	421	7.389	116.61	0.911	119.006	9238	1.149	0.87	0.986
317	KIZ_KAN623-13_4.tif:0023-1039	1.043	183.951	0	739	48.521	117.983	0.899	191.946	14900	1	1	1
318	KIZ_KAN623-13_4.tif:0024-1058	1.533	194.261	0	835	74.957	120.14	0.912	297.799	23117	1	1	0.992
										20039.1

## Sheet: IF condition
Exp. number	Cell line	Gene induced	Culture condition, fixation condition	rabbit-Alexa488	mouse IgG1-Alexa568	mouse IgG2b-Alexa647	Nuclear stain	Date	Replicate
KAN623-1	RPE-BFP-Cas9 pMCB306 (pool)		Serum starved for 24 hours. Fixed in 100% methanol at -20C for 5 minutes.	Kizuna, Proteintech, 21177-1-AP, 1:1000	CEP170, Invitrogen, 41-3200, 1:1000	Ac-Tub, 6B-11, Santa Cruz, 1:1000	DAPI	No.6	2021-03-09
KAN623-2	RPE-BFP-Cas9 CEP164KO (pool)		Serum starved for 24 hours. Fixed in 100% methanol at -20C for 5 minutes.	Kizuna, Proteintech, 21177-1-AP, 1:1000	CEP170, Invitrogen, 41-3200, 1:1000	Ac-Tub, 6B-11, Santa Cruz, 1:1000	DAPI	No.6	2021-03-09
KAN623-3	RPE-BFP-Cas9 CEP83 KO (pool)		Serum starved for 24 hours. Fixed in 100% methanol at -20C for 5 minutes.	Kizuna, Proteintech, 21177-1-AP, 1:1000	CEP170, Invitrogen, 41-3200, 1:1000	Ac-Tub, 6B-11, Santa Cruz, 1:1000	DAPI	No.6	2021-03-09
KAN623-4	RPE-BFP-Cas9 SCLT1 KO (pool)		Serum starved for 24 hours. Fixed in 100% methanol at -20C for 5 minutes.	Kizuna, Proteintech, 21177-1-AP, 1:1000	CEP170, Invitrogen, 41-3200, 1:1000	Ac-Tub, 6B-11, Santa Cruz, 1:1000	DAPI	No.6	2021-03-09
KAN623-5	RPE-BFP-Cas9 FBF1 KO (pool)		Serum starved for 24 hours. Fixed in 100% methanol at -20C for 5 minutes.	Kizuna, Proteintech, 21177-1-AP, 1:1000	CEP170, Invitrogen, 41-3200, 1:1000	Ac-Tub, 6B-11, Santa Cruz, 1:1000	DAPI	No.6	2021-03-09
KAN623-6	RPE-BFP-Cas9 CEP89KO (pool)		Serum starved for 24 hours. Fixed in 100% methanol at -20C for 5 minutes.	Kizuna, Proteintech, 21177-1-AP, 1:1000	CEP170, Invitrogen, 41-3200, 1:1000	Ac-Tub, 6B-11, Santa Cruz, 1:1000	DAPI	No.6	2021-03-09
KAN623-7	RPE-BFP-Cas9 CCDC92 KO (pool)		Serum starved for 24 hours. Fixed in 100% methanol at -20C for 5 minutes.	Kizuna, Proteintech, 21177-1-AP, 1:1000	CEP170, Invitrogen, 41-3200, 1:1000	Ac-Tub, 6B-11, Santa Cruz, 1:1000	DAPI	No.6	2021-03-09
KAN623-8	RPE-BFP-Cas9 ANKRD26 KO (pool)		Serum starved for 24 hours. Fixed in 100% methanol at -20C for 5 minutes.	Kizuna, Proteintech, 21177-1-AP, 1:1000	CEP170, Invitrogen, 41-3200, 1:1000	Ac-Tub, 6B-11, Santa Cruz, 1:1000	DAPI	No.6	2021-03-09
KAN623-9	RPE-BFP-Cas9 TTBK2 KO (pool)		Serum starved for 24 hours. Fixed in 100% methanol at -20C for 5 minutes.	Kizuna, Proteintech, 21177-1-AP, 1:1000	CEP170, Invitrogen, 41-3200, 1:1000	Ac-Tub, 6B-11, Santa Cruz, 1:1000	DAPI	No.6	2021-03-09
KAN623-10	RPE-BFP-Cas9 INPP5E KO (pool)		Serum starved for 24 hours. Fixed in 100% methanol at -20C for 5 minutes.	Kizuna, Proteintech, 21177-1-AP, 1:1000	CEP170, Invitrogen, 41-3200, 1:1000	Ac-Tub, 6B-11, Santa Cruz, 1:1000	DAPI	No.6	2021-03-09
KAN623-11	RPE-BFP-Cas9 Kiz KO (pool)		Serum starved for 24 hours. Fixed in 100% methanol at -20C for 5 minutes.	Kizuna, Proteintech, 21177-1-AP, 1:1000	CEP170, Invitrogen, 41-3200, 1:1000	Ac-Tub, 6B-11, Santa Cruz, 1:1000	DAPI	No.6	2021-03-09
KAN623-12	RPE-BFP-Cas9 LRRC45 KO (pool)		Serum starved for 24 hours. Fixed in 100% methanol at -20C for 5 minutes.	Kizuna, Proteintech, 21177-1-AP, 1:1000	CEP170, Invitrogen, 41-3200, 1:1000	Ac-Tub, 6B-11, Santa Cruz, 1:1000	DAPI	No.6	2021-03-09
KAN623-13	RPE-BFP-Cas9 sgSafe (pool)		Serum starved for 24 hours. Fixed in 100% methanol at -20C for 5 minutes.	Kizuna, Proteintech, 21177-1-AP, 1:1000	CEP170, Invitrogen, 41-3200, 1:1000	Ac-Tub, 6B-11, Santa Cruz, 1:1000	DAPI	No.6	2021-03-09
