# Supplementary material for: A hierarchical pathway for assembly of the distal appendages that organize primary cilia
Source: eLife. 2025 Jan 30;14:e85999. doi: 10.7554/eLife.85999 (PMC11984956; doi:10.7554/eLife.85999)
Supplement: Figure 2—source data 10. [file elife-85999-fig2-data10.xlsx]

## Sheet: Raw data
	Label	Area	Mean	Min	Max	X	Y	Circ	IntDen	RawIntDen	AR	Round	Solidity
283	LRRC45_KAN620-1_1.tif:0001-0213	0.732	91.674	0	400	61.185	15.375	0.886	67.127	12926	1.181	0.847	0.956	0.645442
284	LRRC45_KAN620-1_1.tif:0002-0226	0.561	159	0	737	73.763	16.292	0.889	89.177	17172	1.114	0.898	0.991	0.85746
285	LRRC45_KAN620-1_1.tif:0003-0706	0.421	195.346	0	566	74.045	50.913	0.899	82.171	15823	1	1	1	0.7901
286	LRRC45_KAN620-1_1.tif:0004-0901	0.447	114.826	0	286	17.829	64.936	0.94	51.282	9875	1.116	0.896	0.977	0.493095
287	LRRC45_KAN620-1_1.tif:0005-0955	0.904	133.402	0	563	85.961	68.804	0.83	120.543	23212	1.406	0.711	0.961	1.15906
288	LRRC45_KAN620-1_1.tif:0006-1062	0.691	126.752	0	473	43.639	76.577	0.747	87.546	16858	1.563	0.64	0.881	0.841781
289	LRRC45_KAN620-1_2.tif:0001-0116	0.254	8.796	0	39	19.565	8.395	0.935	2.238	431	1	1	1	0.0215214
290	LRRC45_KAN620-1_2.tif:0002-0299	0.254	9.571	0	38	47.166	21.583	0.935	2.436	469	1	1	1	0.0234189
291	LRRC45_KAN620-1_2.tif:0003-0675	1.085	119.928	0	878	69.644	48.626	0.761	130.166	25065	1.806	0.554	0.931	1.25159
292	LRRC45_KAN620-1_2.tif:0004-0987	0.883	88.135	0	490	68.853	71.13	0.786	77.809	14983	1.602	0.624	0.912	0.748156
293	LRRC45_KAN620-1_2.tif:0005-1157	0.888	119.48	0	762	55.176	83.38	0.668	106.101	20431	1.611	0.621	0.832	1.02019
294	LRRC45_KAN620-1_3.tif:0001-0072	0.602	134.853	0	665	53.826	5.184	0.889	81.236	15643	1.23	0.813	0.983	0.781112
295	LRRC45_KAN620-1_3.tif:0002-0244	0.665	196.445	0	936	5.121	17.625	0.891	130.582	25145	1.127	0.888	0.985	1.25558
296	LRRC45_KAN620-1_3.tif:0003-0602	0.706	132.132	0	768	53.736	43.401	0.887	93.321	17970	1.207	0.828	0.975	0.897307
297	LRRC45_KAN620-1_3.tif:0004-0774	0.675	118.338	0	525	86.567	55.812	0.712	79.891	15384	1.944	0.514	0.897	0.768179
298	LRRC45_KAN620-1_3.tif:0005-0825	0.706	9.044	0	71	73.311	59.473	0.901	6.388	1230	1.179	0.848	0.938	0.0614184
299	LRRC45_KAN620-1_3.tif:0006-0940	0.644	139.226	0	463	5.593	67.716	0.888	89.654	17264	1.1	0.909	0.969	0.862054
300	LRRC45_KAN620-1_3.tif:0007-1015	0.711	104.964	0	698	56.916	73.171	0.838	74.677	14380	1.446	0.691	0.948	0.718046
301	LRRC45_KAN620-1_3.tif:0008-1036	0.421	163.259	0	544	32.32	74.694	0.899	68.674	13224	1	1	1	0.660322
302	LRRC45_KAN620-1_3.tif:0009-1249	0.743	115.315	0	551	2.958	90.024	0.803	85.635	16490	1.39	0.719	0.92	0.823406
303	LRRC45_KAN620-1_4.tif:0001-0091	0.717	149.507	0	679	24.185	6.586	0.9	107.145	20632	1.191	0.84	0.982	1.03023
304	LRRC45_KAN620-1_4.tif:0002-0253	0.914	128.75	0	793	81.085	18.229	0.945	117.677	22660	1.045	0.957	0.959	1.1315
305	LRRC45_KAN620-1_4.tif:0003-0382	0.374	20.458	0	146	25.258	27.528	0.903	7.65	1473	1.125	0.889	1	0.0735522
306	LRRC45_KAN620-1_4.tif:0004-0573	0.327	122.667	0	251	75.519	41.296	0.937	40.133	7728	1.039	0.963	0.992	0.385887
307	LRRC45_KAN620-1_4.tif:0005-1171	0.254	63.122	0	233	28.717	84.422	0.935	16.062	3093	1	1	1	0.154445
308	LRRC45_KAN620-1_5.tif:0001-0206	0.509	140.847	0	645	46.985	14.845	0.925	71.681	13803	1.052	0.95	0.99	0.689234
309	LRRC45_KAN620-1_5.tif:0002-0308	1.163	99.853	0	769	7.947	22.179	0.757	116.155	22367	2.084	0.48	0.924	1.11687
310	LRRC45_KAN620-1_5.tif:0003-0368	0.55	159.811	0	682	27.24	26.555	0.899	87.972	16940	1.145	0.873	0.981	0.845876
311	LRRC45_KAN620-1_5.tif:0004-0906	0.924	127.017	0	577	60.098	65.3	0.933	117.412	22609	1.095	0.914	0.962	1.12895
312	LRRC45_KAN620-1_5.tif:0005-0941	1.039	126.495	0	796	86.014	67.793	0.729	131.381	25299	1.939	0.516	0.909	1.26327
313	LRRC45_KAN620-1_5.tif:0006-1038	0.93	84.307	0	578	2.938	74.772	0.767	78.37	15091	1.491	0.671	0.891	0.753548
314	LRRC45_KAN620-1_6.tif:0001-0027	0.55	106.981	0	573	71.841	1.93	0.837	58.89	11340	1.369	0.731	0.938	0.566247
315	LRRC45_KAN620-1_6.tif:0002-0164	0.608	157.598	0	609	47.814	11.849	0.924	95.756	18439	1.041	0.961	0.983	0.920726
316	LRRC45_KAN620-1_6.tif:0003-0605	0.254	90.224	18	205	59.849	43.634	0.935	22.959	4421	1	1	1	0.220757
317	LRRC45_KAN620-1_6.tif:0004-0824	0.561	149.935	0	639	15.386	59.38	0.916	84.093	16193	1.112	0.9	0.991	0.808575
318	LRRC45_KAN620-1_6.tif:0005-0922	0.945	121.72	0	720	77.587	66.427	0.726	115.044	22153	1.582	0.632	0.871	1.10618
319	LRRC45_KAN620-1_6.tif:0006-1135	0.493	51.347	0	136	68.285	81.828	0.926	25.332	4878	1.22	0.82	0.979	0.243576
										14678.2				0.732937
320	LRRC45_KAN620-2_1.tif:0001-0148	0.717	185.261	0	1019	89.834	10.699	0.924	132.768	25566	1.189	0.841	0.986	1.2766
321	LRRC45_KAN620-2_1.tif:0002-0257	0.826	164.736	0	682	16.76	18.551	0.963	136.024	26193	1.029	0.972	0.978	1.30791
322	LRRC45_KAN620-2_1.tif:0003-0373	0.467	130.367	0	525	51.742	26.916	0.89	60.931	11733	1.111	0.9	1	0.585871
323	LRRC45_KAN620-2_1.tif:0004-0394	0.904	135.138	0	673	74.878	28.374	0.89	122.112	23514	1.351	0.74	0.959	1.17414
324	LRRC45_KAN620-2_1.tif:0005-0434	0.711	185.526	0	950	32.752	31.312	0.893	131.994	25417	1.222	0.818	0.982	1.26916
325	LRRC45_KAN620-2_1.tif:0006-0791	0.909	6.503	0	48	61.679	56.998	0.963	5.91	1138	1.155	0.866	0.962	0.0568245
326	LRRC45_KAN620-2_1.tif:0007-0795	0.509	136.561	0	475	24.502	57.29	0.925	69.5	13383	1.052	0.95	0.99	0.668262
327	LRRC45_KAN620-2_1.tif:0008-0815	0.919	135.565	0	640	56.862	58.743	0.927	124.61	23995	1.106	0.904	0.965	1.19816
328	LRRC45_KAN620-2_1.tif:0009-1016	0.628	174.248	0	643	50.553	73.253	0.876	109.492	21084	1	1	1	1.0528
329	LRRC45_KAN620-2_1.tif:0010-1083	0.618	176.882	0	667	74.91	78.075	0.912	109.311	21049	1	1	0.992	1.05105
330	LRRC45_KAN620-2_2.tif:0001-0028	0.769	134.554	0	723	42.121	2.091	0.896	103.416	19914	1.077	0.929	0.955	0.994378
331	LRRC45_KAN620-2_2.tif:0002-0295	0.514	154.212	0	391	6.378	21.295	0.877	79.284	15267	1.222	0.818	1	0.762337
332	LRRC45_KAN620-2_2.tif:0003-0373	0.509	145.898	0	494	58.66	26.88	0.925	74.252	14298	1.052	0.95	0.99	0.713951
333	LRRC45_KAN620-2_2.tif:0004-0509	1.293	128.221	0	634	80.377	36.669	0.918	165.802	31927	1.085	0.921	0.965	1.59423
334	LRRC45_KAN620-2_2.tif:0005-0718	0.467	148.389	0	507	11.53	51.778	0.89	69.354	13355	1.111	0.9	1	0.666864
335	LRRC45_KAN620-2_2.tif:0006-0730	0.587	48.389	0	227	45.662	52.648	0.947	28.396	5468	1.037	0.964	0.97	0.273037
336	LRRC45_KAN620-2_2.tif:0007-1057	0.405	104.154	0	284	77.763	76.171	0.929	42.189	8124	1.249	0.801	0.987	0.405661
337	LRRC45_KAN620-2_2.tif:0008-1096	0.774	134.114	0	679	61.082	79.046	0.836	103.775	19983	1.421	0.704	0.949	0.997824
338	LRRC45_KAN620-2_3.tif:0001-0121	0.846	177.202	0	862	15.781	8.737	0.906	149.999	28884	1.273	0.785	0.959	1.44228
339	LRRC45_KAN620-2_3.tif:0002-0642	1.023	118.609	0	761	82.84	46.259	0.819	121.343	23366	1.404	0.712	0.927	1.16675
340	LRRC45_KAN620-2_3.tif:0003-0642	0.67	167.178	0	749	26.666	46.304	0.898	111.995	21566	1.112	0.899	0.989	1.07687
341	LRRC45_KAN620-2_3.tif:0004-0656	0.462	28.966	0	106	61.791	47.27	0.909	13.388	2578	1.115	0.897	0.994	0.128729
342	LRRC45_KAN620-2_3.tif:0005-0853	0.826	123.252	0	423	52.151	61.493	0.893	101.77	19597	1.142	0.875	0.978	0.978549
343	LRRC45_KAN620-2_3.tif:0006-1061	0.556	117.953	0	487	35.176	76.476	0.845	65.543	12621	1.349	0.741	0.943	0.630212
344	LRRC45_KAN620-2_3.tif:0007-1207	0.608	158.889	0	785	29.66	87.022	0.924	96.541	18590	1.084	0.923	0.987	0.928266
345	LRRC45_KAN620-2_4.tif:0001-0007	0.571	168.382	0	652	6.089	0.504	0.879	96.187	18522	1.1	0.909	1	0.924871
346	LRRC45_KAN620-2_4.tif:0002-0090	0.743	115.839	0	384	35.004	6.501	0.823	86.024	16565	1.452	0.689	0.923	0.827151
347	LRRC45_KAN620-2_4.tif:0003-0219	0.421	157.346	0	516	61.65	15.818	0.899	66.187	12745	1	1	1	0.636404
348	LRRC45_KAN620-2_4.tif:0004-0260	0.618	175.639	0	547	86.002	18.773	0.912	108.542	20901	1	1	0.992	1.04366
349	LRRC45_KAN620-2_4.tif:0005-0372	0.566	170.661	0	563	36.029	26.847	0.897	96.603	18602	1.103	0.907	0.995	0.928865
350	LRRC45_KAN620-2_4.tif:0006-0556	0.421	151.679	0	480	76.712	40.103	0.899	63.803	12286	1	1	1	0.613485
351	LRRC45_KAN620-2_4.tif:0007-0663	1.059	133.667	0	1024	9.434	47.754	0.841	141.607	27268	1.395	0.717	0.915	1.36159
352	LRRC45_KAN620-2_4.tif:0008-0838	0.623	183.383	0	969	29.186	60.389	0.869	114.28	22006	1.2	0.833	1	1.09884
353	LRRC45_KAN620-2_4.tif:0009-0880	0.696	169.888	0	892	43.964	63.427	0.922	118.222	22765	1.075	0.931	0.968	1.13674
354	LRRC45_KAN620-2_4.tif:0010-0984	0.862	122.476	0	606	43.93	70.959	0.767	105.582	20331	1.499	0.667	0.888	1.0152
355	LRRC45_KAN620-2_4.tif:0011-1185	0.722	177.612	0	741	61.323	85.393	0.931	128.208	24688	1.016	0.984	0.982	1.23276
356	LRRC45_KAN620-2_5.tif:0001-0397	0.93	93.117	0	566	62.71	28.629	0.735	86.559	16668	1.928	0.519	0.923	0.832294
357	LRRC45_KAN620-2_5.tif:0002-0534	0.254	142.714	0	351	51.633	38.518	0.935	36.316	6993	1	1	1	0.349186
358	LRRC45_KAN620-2_5.tif:0003-0556	0.665	165.156	0	914	33.443	40.098	0.916	109.783	21140	1.121	0.892	0.988	1.0556
359	LRRC45_KAN620-2_5.tif:0004-0628	1.241	114.519	0	583	80.727	45.259	0.808	142.136	27370	1.66	0.602	0.945	1.36668
360	LRRC45_KAN620-2_5.tif:0005-0684	0.66	180.008	0	950	25.801	49.33	0.884	118.721	22861	1.311	0.763	0.988	1.14153
361	LRRC45_KAN620-2_5.tif:0006-0912	0.997	120.885	0	734	65.378	65.777	0.735	120.533	23210	1.711	0.584	0.916	1.15896
362	LRRC45_KAN620-2_5.tif:0007-0963	1.039	132.705	0	730	82.904	69.431	0.824	137.831	26541	1.527	0.655	0.909	1.32529
363	LRRC45_KAN620-2_5.tif:0008-1049	0.493	5.842	0	36	85.353	75.63	0.926	2.882	555	1.233	0.811	0.979	0.0277132
364	LRRC45_KAN620-2_6.tif:0001-0443	1.2	123.247	0	919	87.031	31.925	0.7	147.849	28470	1.814	0.551	0.857	1.42161
365	LRRC45_KAN620-2_6.tif:0002-0446	0.608	138.906	0	561	46.19	32.138	0.897	84.399	16252	1.215	0.823	0.987	0.811521
366	LRRC45_KAN620-2_6.tif:0003-0612	0.717	153.942	0	507	61.26	44.114	0.876	110.323	21244	1.089	0.918	0.979	1.06079
367	LRRC45_KAN620-2_6.tif:0004-0777	0.514	150.707	0	497	78.697	55.997	0.905	77.482	14920	1.025	0.975	0.995	0.74501
368	LRRC45_KAN620-2_6.tif:0005-0846	0.748	127.271	0	752	74.513	61.014	0.872	95.175	18327	1.449	0.69	0.947	0.915134
369	LRRC45_KAN620-2_6.tif:0006-0857	0.795	128.699	0	610	87.293	61.762	0.903	102.258	19691	1.189	0.841	0.965	0.983243
370	LRRC45_KAN620-2_6.tif:0007-0923	0.883	149.112	0	891	9.501	66.513	0.87	131.641	25349	1.458	0.686	0.95	1.26577
371	LRRC45_KAN620-2_6.tif:0008-0955	0.68	190.908	0	816	45.115	68.859	0.887	129.875	25009	1.093	0.915	0.996	1.24879
372	LRRC45_KAN620-2_6.tif:0009-0997	0.717	123.652	0	380	50.376	71.896	0.845	88.616	17064	1.385	0.722	0.948	0.852067
										18810.4				0.939273
373	LRRC45_KAN620-3_1.tif:0001-0256	0.493	29.326	0	107	35.032	18.439	0.957	14.468	2786	1.018	0.983	0.979	0.139115
374	LRRC45_KAN620-3_1.tif:0002-0556	0.701	14.896	0	87	80.689	40.06	0.904	10.443	2011	1.044	0.958	0.971	0.100417
375	LRRC45_KAN620-3_1.tif:0003-0836	0.55	17.906	0	99	40.818	60.257	0.927	9.857	1898	1.109	0.902	0.986	0.094774
376	LRRC45_KAN620-3_1.tif:0004-0916	0.473	11.231	0	82	11.88	66.004	0.887	5.307	1022	1.213	0.824	0.953	0.0510322
377	LRRC45_KAN620-3_2.tif:0001-0199	0.623	38.5	0	192	21.845	14.333	0.849	23.992	4620	1.437	0.696	0.923	0.230693
378	LRRC45_KAN620-3_2.tif:0002-0364	0.685	20.508	0	101	80.068	26.237	0.961	14.058	2707	1.065	0.939	0.967	0.13517
379	LRRC45_KAN620-3_2.tif:0003-0477	0.545	10.419	0	47	84.419	34.377	0.948	5.681	1094	1.096	0.913	0.977	0.0546274
380	LRRC45_KAN620-3_2.tif:0004-0487	0.452	29	0	77	50.945	35.14	0.919	13.102	2523	1.107	0.903	0.983	0.125983
381	LRRC45_KAN620-3_2.tif:0005-0511	0.545	35.438	0	169	41.806	36.852	0.919	19.324	3721	1.114	0.898	0.977	0.185803
382	LRRC45_KAN620-3_2.tif:0006-0657	0.826	39.088	0	133	65.941	47.357	0.883	32.275	6215	1.277	0.783	0.946	0.310338
383	LRRC45_KAN620-3_2.tif:0007-1101	0.602	45.198	0	181	85.838	79.33	0.889	27.228	5243	1.223	0.817	0.987	0.261802
384	LRRC45_KAN620-3_2.tif:0008-1222	0.592	23.684	0	93	71.555	88.067	0.785	14.021	2700	1.741	0.574	0.901	0.134821
385	LRRC45_KAN620-3_3.tif:0001-0229	0.53	10.314	0	45	62.442	16.504	0.921	5.463	1052	1.21	0.826	0.971	0.0525302
386	LRRC45_KAN620-3_3.tif:0002-0269	0.447	55.57	0	188	2.883	19.421	0.909	24.818	4779	1.379	0.725	0.989	0.238633
387	LRRC45_KAN620-3_3.tif:0003-0334	0.561	13.843	0	52	84.828	24.054	0.933	7.764	1495	1.251	0.799	0.952	0.0746508
388	LRRC45_KAN620-3_3.tif:0004-0348	0.462	12.787	0	80	37.65	25.082	0.909	5.91	1138	1.115	0.897	0.994	0.0568245
389	LRRC45_KAN620-3_3.tif:0005-0787	0.254	59.408	0	115	58.696	56.75	0.935	15.117	2911	1	1	1	0.145357
390	LRRC45_KAN620-3_3.tif:0006-0842	0.519	24.88	0	79	3.464	60.719	0.962	12.921	2488	1.119	0.893	0.962	0.124235
391	LRRC45_KAN620-3_3.tif:0007-0868	0.254	20.98	0	56	43.851	62.587	0.935	5.339	1028	1	1	1	0.0513318
392	LRRC45_KAN620-3_3.tif:0008-0935	0.815	19.376	0	101	77.263	67.378	0.927	15.798	3042	1.167	0.857	0.972	0.151898
393	LRRC45_KAN620-3_4.tif:0001-0168	0.592	18.018	0	92	15.351	12.096	0.9	10.667	2054	1.211	0.826	0.974	0.102564
394	LRRC45_KAN620-3_4.tif:0002-0375	0.504	12.515	0	61	32.432	27.027	0.946	6.304	1214	1.026	0.974	0.985	0.0606194
395	LRRC45_KAN620-3_4.tif:0003-0729	0.525	17.614	0	96	81.6	52.537	0.912	9.239	1779	1.148	0.871	0.957	0.0888319
396	LRRC45_KAN620-3_4.tif:0004-0744	0.467	36.7	0	151	65.506	53.615	0.732	17.153	3303	1.771	0.565	0.857	0.164931
397	LRRC45_KAN620-3_4.tif:0005-0752	0.405	4.885	0	29	72.856	54.192	0.929	1.979	381	1.259	0.794	0.987	0.0190247
398	LRRC45_KAN620-3_4.tif:0006-1120	0.499	9.51	0	48	67.296	80.724	0.936	4.741	913	1.091	0.917	0.985	0.0455894
399	LRRC45_KAN620-3_5.tif:0001-0133	0.415	21.95	0	115	78.798	9.624	0.919	9.119	1756	1.031	0.97	0.994	0.0876835
400	LRRC45_KAN620-3_5.tif:0002-0460	0.587	14.699	0	76	72.87	33.156	0.919	8.626	1661	1.242	0.805	0.974	0.0829398
401	LRRC45_KAN620-3_5.tif:0003-0702	0.327	11.444	0	41	54.764	50.593	0.937	3.744	721	1.039	0.963	0.992	0.0360021
402	LRRC45_KAN620-3_5.tif:0004-0883	0.374	8.333	0	36	13.512	63.632	0.903	3.116	600	1.125	0.889	1	0.0299602
403	LRRC45_KAN620-3_5.tif:0005-1187	0.374	26.333	0	129	48.138	85.575	0.903	9.846	1896	1.125	0.889	1	0.0946742
404	LRRC45_KAN620-3_6.tif:0001-0064	0.815	18.248	0	155	24.27	4.648	0.917	14.878	2865	1.168	0.856	0.946	0.14306
405	LRRC45_KAN620-3_6.tif:0002-0564	0.291	16.107	0	82	75.847	40.644	0.92	4.684	902	1.143	0.875	1	0.0450401
406	LRRC45_KAN620-3_6.tif:0003-0743	0.909	19.211	0	102	47.063	53.546	0.895	17.459	3362	1.058	0.945	0.949	0.167877
407	LRRC45_KAN620-3_6.tif:0004-0935	0.415	17.137	0	54	53.936	67.419	0.919	7.12	1371	1.031	0.97	0.994	0.068459
408	LRRC45_KAN620-3_6.tif:0005-1099	0.369	8.986	0	33	36.972	79.23	0.924	3.313	638	1.13	0.885	0.993	0.0318577
										2219.14				0.11081
409	LRRC45_KAN620-4_1.tif:0001-0494	0.369	23.606	0	85	1.51	35.639	0.924	8.704	1676	1.13	0.885	0.993	0.0836888
410	LRRC45_KAN620-4_1.tif:0002-0586	0.535	13.903	0	57	52.399	42.257	0.96	7.437	1432	1.125	0.889	0.972	0.071505
411	LRRC45_KAN620-4_1.tif:0003-0768	0.743	24.175	0	99	34.355	55.321	0.823	17.953	3457	1.323	0.756	0.923	0.172621
412	LRRC45_KAN620-4_1.tif:0004-0900	0.332	134.75	0	484	0.355	64.903	0.833	44.786	8624	1.843	0.542	0.985	0.430628
413	LRRC45_KAN620-4_1.tif:0005-1096	0.535	22.311	0	85	78.6	78.995	0.93	11.934	2298	1.185	0.844	0.981	0.114747
414	LRRC45_KAN620-4_2.tif:0001-0082	0.374	35.278	0	112	81.828	5.909	0.903	13.191	2540	1.125	0.889	1	0.126831
415	LRRC45_KAN620-4_2.tif:0002-0656	0.457	36.148	0	102	43.78	47.314	0.887	16.519	3181	1.396	0.716	0.946	0.158839
416	LRRC45_KAN620-4_2.tif:0003-0755	0.649	32.192	0	122	11.589	54.423	0.806	20.897	4024	1.599	0.625	0.912	0.200933
417	LRRC45_KAN620-4_2.tif:0004-0883	0.493	17.526	0	63	81.5	63.624	0.926	8.647	1665	1.068	0.936	0.974	0.0831395
418	LRRC45_KAN620-4_2.tif:0005-1034	0.436	32.988	0	100	3.603	74.556	0.951	14.39	2771	1.163	0.86	0.971	0.138366
419	LRRC45_KAN620-4_3.tif:0001-0447	0.322	32	0	111	24.502	32.212	0.96	10.303	1984	1.081	0.925	0.984	0.0990683
420	LRRC45_KAN620-4_3.tif:0002-0784	0.421	136.568	0	546	69.289	56.534	0.899	57.447	11062	1	1	1	0.552366
421	LRRC45_KAN620-4_4.tif:0001-0466	0.327	32.222	0	82	26.956	33.586	0.937	10.542	2030	1.039	0.963	0.992	0.101365
422	LRRC45_KAN620-4_4.tif:0002-0488	0.369	14.085	0	43	72.888	35.171	0.924	5.193	1000	1.13	0.885	0.993	0.0499336
423	LRRC45_KAN620-4_4.tif:0003-0789	0.571	39.645	0	122	58.226	56.847	0.922	22.647	4361	1.249	0.8	0.965	0.217761
424	LRRC45_KAN620-4_4.tif:0004-0895	0.291	6.893	0	41	56.426	64.533	0.92	2.005	386	1.143	0.875	1	0.0192744
425	LRRC45_KAN620-4_4.tif:0005-0979	0.706	26.169	0	113	76.491	70.59	0.803	18.482	3559	1.469	0.681	0.901	0.177714
426	LRRC45_KAN620-4_4.tif:0006-1172	0.566	186.697	0	1163	35.308	84.498	0.897	105.681	20350	1.103	0.907	0.995	1.01615
427	LRRC45_KAN620-4_5.tif:0001-0244	0.54	25.865	0	145	68.959	17.608	0.882	13.97	2690	1.351	0.74	0.981	0.134321
428	LRRC45_KAN620-4_5.tif:0002-0471	0.405	25.141	0	92	2.28	33.982	0.929	10.184	1961	1.026	0.975	0.981	0.0979198
429	LRRC45_KAN620-4_5.tif:0003-0705	0.369	77.028	0	329	43.278	50.801	0.924	28.401	5469	1.13	0.885	0.993	0.273087
430	LRRC45_KAN620-4_5.tif:0004-1020	0.327	11.27	0	68	79.418	73.501	0.937	3.687	710	1.039	0.963	0.992	0.0354529
431	LRRC45_KAN620-4_5.tif:0005-1137	0.369	36.521	0	87	58.159	81.968	0.924	13.466	2593	1.13	0.885	0.993	0.129478
432	LRRC45_KAN620-4_6.tif:0001-0162	0.878	23.118	0	279	38.166	11.697	0.799	20.29	3907	1.485	0.673	0.923	0.195091
433	LRRC45_KAN620-4_6.tif:0002-0161	0.405	17.974	0	75	78.837	11.602	0.929	7.281	1402	1.259	0.794	0.987	0.0700069
434	LRRC45_KAN620-4_6.tif:0003-0539	0.452	15.483	0	72	86.299	38.846	0.919	6.995	1347	1.135	0.881	0.983	0.0672606
435	LRRC45_KAN620-4_6.tif:0004-0592	0.327	19.778	0	72	64.493	42.666	0.937	6.471	1246	1.039	0.963	0.992	0.0622173
436	LRRC45_KAN620-4_6.tif:0005-0943	0.447	21.326	0	121	78.807	67.949	0.94	9.524	1834	1.16	0.862	0.983	0.0915783
437	LRRC45_KAN620-4_6.tif:0006-1210	0.618	25.84	0	89	46.766	87.235	0.928	15.969	3075	1.352	0.739	0.964	0.153546
										3539.1				0.17672
														0
														0
														0
438	LRRC45_KAN620-5_1.tif:0001-0130	0.291	138.75	12	431	40.283	9.404	0.92	40.351	7770	1.143	0.875	1	0.387984
439	LRRC45_KAN620-5_1.tif:0002-0201	0.291	80.75	0	429	72.063	14.521	0.92	23.483	4522	1.143	0.875	1	0.2258
440	LRRC45_KAN620-5_1.tif:0003-0437	0.312	160.05	0	527	91.881	31.492	0.857	49.87	9603	1.667	0.6	1	0.479513
441	LRRC45_KAN620-5_1.tif:0004-0616	0.613	149.5	0	692	10.588	44.397	0.879	91.612	17641	1.209	0.827	0.992	0.880879
442	LRRC45_KAN620-5_1.tif:0005-0677	1.007	9.314	0	50	81.626	48.791	0.909	9.384	1807	1.26	0.793	0.951	0.0902301
443	LRRC45_KAN620-5_1.tif:0006-0793	0.509	145.755	0	619	23.132	57.146	0.925	74.179	14284	1.052	0.95	0.99	0.713252
444	LRRC45_KAN620-5_1.tif:0007-1108	0.421	144.481	0	471	70.658	79.882	0.899	60.775	11703	1	1	1	0.584373
445	LRRC45_KAN620-5_1.tif:0008-1129	0.914	93.131	0	489	33.966	81.363	0.732	85.121	16391	1.701	0.588	0.859	0.818462
446	LRRC45_KAN620-5_2.tif:0001-0324	0.867	99.749	0	437	16.243	23.365	0.816	86.507	16658	1.397	0.716	0.93	0.831794
447	LRRC45_KAN620-5_2.tif:0002-0575	0.924	99.725	0	574	48.022	41.453	0.78	92.184	17751	1.66	0.602	0.908	0.886372
448	LRRC45_KAN620-5_2.tif:0003-0664	0.608	54.59	0	306	9.982	47.863	0.94	33.169	6387	1.154	0.866	0.951	0.318926
449	LRRC45_KAN620-5_2.tif:0004-0831	1.018	103.408	0	575	62.894	59.937	0.805	105.255	20268	1.496	0.668	0.951	1.01205
450	LRRC45_KAN620-5_4.tif:0001-0659	1.288	119.06	0	1050	71.721	47.481	0.725	153.338	29527	1.967	0.508	0.894	1.47439
451	LRRC45_KAN620-5_4.tif:0002-0699	1.335	93.444	0	836	43.069	50.372	0.698	124.713	24015	1.941	0.515	0.858	1.19916
452	LRRC45_KAN620-5_4.tif:0003-0894	1.168	76.142	0	522	71.955	64.419	0.713	88.969	17132	1.923	0.52	0.87	0.855463
453	LRRC45_KAN620-5_4.tif:0004-0985	0.597	144.104	0	671	20.862	71.019	0.935	86.061	16572	1.128	0.887	0.983	0.8275
454	LRRC45_KAN620-5_4.tif:0005-1102	0.753	106.621	0	600	51.835	79.451	0.806	80.286	15460	1.595	0.627	0.915	0.771974
455	LRRC45_KAN620-5_5.tif:0001-0394	0.8	107.591	0	410	32.374	28.424	0.886	86.045	16569	1.366	0.732	0.972	0.82735
456	LRRC45_KAN620-5_5.tif:0002-0617	0.327	74.254	0	275	37.149	44.499	0.9	24.294	4678	1.286	0.778	1	0.23359
457	LRRC45_KAN620-5_5.tif:0003-0682	0.935	106.75	0	725	62.789	49.165	0.851	99.786	19215	1.438	0.696	0.935	0.959475
458	LRRC45_KAN620-5_5.tif:0004-1007	0.685	122.652	0	365	80.452	72.594	0.838	84.077	16190	1.175	0.851	0.957	0.808425
459	LRRC45_KAN620-5_6.tif:0001-0167	0.41	85.443	0	414	16.355	12.039	0.908	35.054	6750	1.252	0.799	0.994	0.337052
460	LRRC45_KAN620-5_6.tif:0002-0348	0.364	12.243	0	37	48.283	25.114	0.947	4.451	857	1.146	0.873	0.986	0.0427931
461	LRRC45_KAN620-5_6.tif:0003-0507	0.602	160.224	0	836	66.908	36.569	0.916	96.52	18586	1.105	0.905	0.983	0.928066
462	LRRC45_KAN620-5_6.tif:0004-0586	0.68	59.069	0	388	15.829	42.257	0.953	40.185	7738	1.192	0.839	0.967	0.386386
463	LRRC45_KAN620-5_6.tif:0005-0745	0.467	127.211	0	349	63.201	53.689	0.938	59.456	11449	1.254	0.797	0.957	0.57169
464	LRRC45_KAN620-5_6.tif:0006-1044	0.836	133.193	0	500	74.642	75.234	0.895	111.362	21444	1.298	0.77	0.955	1.07078
465	LRRC45_KAN620-5_6.tif:0007-1171	0.784	94.987	0	569	41.003	84.444	0.799	74.485	14343	1.626	0.615	0.926	0.716198
										13761.1				0.68714
														0
														0
														0
466	LRRC45_KAN620-6_1.tif:0001-0021	0.514	128.778	0	556	41.473	1.549	0.877	66.207	12749	1.222	0.818	1	0.636604
467	LRRC45_KAN620-6_1.tif:0002-0690	0.467	142.7	0	601	19.853	49.724	0.89	66.696	12843	1.111	0.9	1	0.641298
468	LRRC45_KAN620-6_1.tif:0003-0834	0.421	143.259	0	469	68.424	60.137	0.899	60.261	11604	1	1	1	0.57943
469	LRRC45_KAN620-6_2.tif:0001-0166	0.514	159.798	0	703	48.856	11.966	0.905	82.156	15820	1.025	0.975	0.995	0.78995
470	LRRC45_KAN620-6_2.tif:0002-0498	0.628	135.529	0	654	69.53	35.943	0.891	85.162	16399	1.344	0.744	0.968	0.818862
471	LRRC45_KAN620-6_2.tif:0003-0545	0.769	173.878	0	913	79.576	39.303	0.883	133.64	25734	1.268	0.789	0.983	1.28499
472	LRRC45_KAN620-6_2.tif:0004-0749	0.509	142.184	0	704	17.007	53.976	0.925	72.361	13934	1.052	0.95	0.99	0.695775
473	LRRC45_KAN620-6_2.tif:0005-0944	0.701	48.489	0	303	80.849	68.057	0.805	33.994	6546	1.627	0.614	0.947	0.326866
474	LRRC45_KAN620-6_2.tif:0006-1200	0.665	172.328	0	739	62.442	86.476	0.891	114.55	22058	1.12	0.893	0.985	1.10144
475	LRRC45_KAN620-6_3.tif:0001-0062	0.322	128.435	0	347	78.549	4.468	0.96	41.353	7963	1.081	0.925	0.984	0.397621
476	LRRC45_KAN620-6_3.tif:0002-0454	0.665	166.047	0	630	89.034	32.717	0.891	110.375	21254	1.127	0.888	0.985	1.06129
477	LRRC45_KAN620-6_3.tif:0003-0626	0.327	108.667	0	406	44.932	45.148	0.9	35.552	6846	1.286	0.778	1	0.341846
478	LRRC45_KAN620-6_3.tif:0004-0792	0.961	143.243	0	714	62.701	57.127	0.895	137.618	26500	1.157	0.864	0.946	1.32324
479	LRRC45_KAN620-6_3.tif:0005-1105	0.966	107.306	0	542	68.813	79.607	0.852	103.65	19959	1.475	0.678	0.942	0.996625
480	LRRC45_KAN620-6_4.tif:0001-0670	0.467	156.522	0	602	31.276	48.319	0.89	73.156	14087	1.111	0.9	1	0.703415
481	LRRC45_KAN620-6_4.tif:0002-0836	1.303	102.936	0	958	64.818	60.236	0.691	134.175	25837	2.226	0.449	0.926	1.29014
482	LRRC45_KAN620-6_4.tif:0003-0977	0.919	113.621	0	641	37.906	70.407	0.691	104.439	20111	1.984	0.504	0.874	1.00422
483	LRRC45_KAN620-6_4.tif:0004-1035	0.613	170.771	0	880	80.816	74.624	0.905	104.647	20151	1.063	0.941	0.987	1.00621
484	LRRC45_KAN620-6_5.tif:0001-0081	0.779	157.5	0	583	22.556	5.873	0.918	122.688	23625	1.271	0.787	0.987	1.17968
485	LRRC45_KAN620-6_5.tif:0002-0216	0.421	139.852	0	478	59.344	15.602	0.899	58.828	11328	1	1	1	0.565648
486	LRRC45_KAN620-6_5.tif:0003-0245	0.867	122.461	0	718	21.621	17.718	0.843	106.205	20451	1.306	0.766	0.965	1.02119
487	LRRC45_KAN620-6_5.tif:0004-0245	0.353	27.471	0	141	83.522	17.692	0.919	9.701	1868	1.203	0.831	0.971	0.093276
488	LRRC45_KAN620-6_5.tif:0005-0311	0.587	138.221	0	606	64.531	22.45	0.892	81.112	15619	1.106	0.904	0.966	0.779913
489	LRRC45_KAN620-6_5.tif:0006-0829	0.509	142.949	0	585	17.439	59.741	0.925	72.751	14009	1.052	0.95	0.99	0.69952
490	LRRC45_KAN620-6_5.tif:0007-0890	0.421	148	0	492	34.554	64.173	0.899	62.255	11988	1	1	1	0.598604
491	LRRC45_KAN620-6_5.tif:0008-0903	0.54	63.51	0	182	64.357	65.116	0.91	34.301	6605	1.167	0.857	0.977	0.329812
492	LRRC45_KAN620-6_5.tif:0009-1192	0.421	158.037	0	589	56.534	85.936	0.899	66.477	12801	1	1	1	0.6392
493	LRRC45_KAN620-6_6.tif:0001-0312	0.254	6.163	0	30	39.671	22.52	0.935	1.568	302	1	1	1	0.01508
494	LRRC45_KAN620-6_6.tif:0002-0473	0.467	145.811	0	530	66.226	34.122	0.89	68.15	13123	1.111	0.9	1	0.655279
495	LRRC45_KAN620-6_6.tif:0003-0526	0.613	155.822	0	678	8.005	37.912	0.879	95.486	18387	1.209	0.827	0.992	0.91813
496	LRRC45_KAN620-6_6.tif:0004-0655	0.831	177.906	0	1014	67.053	47.234	0.898	147.823	28465	1.357	0.737	0.985	1.42136
497	LRRC45_KAN620-6_6.tif:0005-0726	0.81	108.218	0	602	90.752	52.272	0.78	87.671	16882	1.58	0.633	0.907	0.84298
498	LRRC45_KAN620-6_6.tif:0006-0947	0.665	29.852	0	340	89.534	68.301	0.906	19.843	3821	1.259	0.795	0.959	0.190796
499	LRRC45_KAN620-6_6.tif:0007-0993	1.002	106.824	0	908	57.298	71.558	0.884	107.067	20617	1.536	0.651	0.963	1.02948
										15302.5				0.764111
														#VALUE!
														0
														0
500	LRRC45_KAN620-7_1.tif:0001-0235	0.971	149.599	0	936	18.202	16.858	0.761	145.278	27975	1.464	0.683	0.895	1.39689
501	LRRC45_KAN620-7_1.tif:0002-0868	0.893	125.523	0	756	86.45	62.591	0.84	112.12	21590	1.413	0.708	0.948	1.07807
502	LRRC45_KAN620-7_1.tif:0003-0951	0.644	133.887	0	602	59.77	68.536	0.888	86.217	16602	1.319	0.758	0.98	0.828998
503	LRRC45_KAN620-7_1.tif:0004-1116	0.654	181.714	0	1060	58.258	80.418	0.902	118.902	22896	1.155	0.866	0.981	1.14328
504	LRRC45_KAN620-7_2.tif:0001-0853	0.956	109.435	0	813	47.336	61.477	0.806	104.569	20136	1.488	0.672	0.913	1.00546
505	LRRC45_KAN620-7_2.tif:0002-0875	0.893	105.994	0	583	12.036	63.086	0.728	94.676	18231	2.054	0.487	0.95	0.91034
506	LRRC45_KAN620-7_2.tif:0003-0878	1.174	105.155	0	743	82.148	63.294	0.764	123.415	23765	1.657	0.603	0.904	1.18667
507	LRRC45_KAN620-7_2.tif:0004-1089	0.649	157.176	0	783	48.105	78.474	0.895	102.03	19647	1.173	0.853	0.977	0.981046
508	LRRC45_KAN620-7_3.tif:0001-0142	0.826	139.975	0	1006	32.792	10.257	0.862	115.579	22256	1.237	0.809	0.935	1.11132
509	LRRC45_KAN620-7_3.tif:0002-0145	0.467	157.211	0	583	72.063	10.485	0.89	73.478	14149	1.111	0.9	1	0.706511
510	LRRC45_KAN620-7_3.tif:0003-0486	0.467	132.567	0	491	44.968	35.059	0.89	61.959	11931	1.111	0.9	1	0.595758
511	LRRC45_KAN620-7_3.tif:0004-0678	0.862	147.916	0	746	75.747	48.914	0.9	127.513	24554	1.275	0.784	0.962	1.22607
512	LRRC45_KAN620-7_3.tif:0005-1041	0.545	126.238	0	308	54.598	75.01	0.948	68.835	13255	1.1	0.909	0.981	0.66187
513	LRRC45_KAN620-7_3.tif:0006-1102	0.566	184.119	0	893	91.734	79.447	0.897	104.221	20069	1.103	0.907	0.995	1.00212
514	LRRC45_KAN620-7_3.tif:0007-1181	0.556	138.467	0	419	22.378	85.104	0.908	76.942	14816	1.127	0.887	0.986	0.739817
515	LRRC45_KAN620-7_4.tif:0001-0244	0.41	12.519	0	160	70.514	17.612	0.941	5.136	989	1.001	0.999	0.988	0.0493844
516	LRRC45_KAN620-7_4.tif:0002-0389	1.044	99.423	0	596	35.995	28.019	0.706	103.78	19984	2.001	0.5	0.855	0.997874
517	LRRC45_KAN620-7_4.tif:0003-0562	0.618	179.479	0	838	65.863	40.497	0.887	110.915	21358	1.201	0.833	0.996	1.06648
518	LRRC45_KAN620-7_4.tif:0004-0654	1.35	89.8	0	902	81.567	47.144	0.755	121.25	23348	1.854	0.539	0.893	1.16585
519	LRRC45_KAN620-7_4.tif:0005-0730	1.283	99.866	0	623	8.977	52.646	0.835	128.099	24667	1.738	0.575	0.956	1.23171
520	LRRC45_KAN620-7_4.tif:0006-0835	0.436	29.643	0	398	76.495	60.171	0.919	12.931	2490	1.213	0.825	0.971	0.124335
521	LRRC45_KAN620-7_4.tif:0007-0849	0.836	113.739	0	563	41.429	61.204	0.768	95.097	18312	1.758	0.569	0.925	0.914385
522	LRRC45_KAN620-7_4.tif:0008-1120	0.608	147.718	0	706	62.116	80.708	0.897	89.753	17283	1.215	0.823	0.987	0.863003
523	LRRC45_KAN620-7_5.tif:0001-0306	0.696	129.291	0	609	22.189	22.124	0.82	89.971	17325	1.566	0.639	0.944	0.8651
524	LRRC45_KAN620-7_5.tif:0002-0381	0.675	195.838	0	951	85.431	27.456	0.905	132.212	25459	1.1	0.909	0.992	1.27126
525	LRRC45_KAN620-7_5.tif:0003-0542	0.514	122.828	0	601	38.446	39.094	0.877	63.149	12160	1.222	0.818	1	0.607193
526	LRRC45_KAN620-7_5.tif:0004-0776	0.706	184.022	0	957	75.378	55.921	0.911	129.969	25027	1.14	0.877	0.978	1.24969
527	LRRC45_KAN620-7_5.tif:0005-0939	0.561	152.593	0	503	2.588	67.704	0.916	85.583	16480	1.1	0.909	0.991	0.822906
528	LRRC45_KAN620-7_5.tif:0006-1067	0.779	130.34	0	729	44.363	76.962	0.842	101.531	19551	1.37	0.73	0.952	0.976252
529	LRRC45_KAN620-7_5.tif:0007-1192	0.421	145.79	0	496	13.368	85.936	0.899	61.326	11809	1	1	1	0.589666
530	LRRC45_KAN620-7_6.tif:0001-0304	0.566	161.147	0	691	62.224	21.904	0.897	91.218	17565	1.103	0.907	0.995	0.877084
531	LRRC45_KAN620-7_6.tif:0002-0580	0.966	129.226	0	700	86.514	41.819	0.879	124.822	24036	1.107	0.903	0.947	1.2002
532	LRRC45_KAN620-7_6.tif:0003-0579	0.509	10.122	0	43	14.983	41.731	0.925	5.152	992	1.048	0.955	0.99	0.0495342
533	LRRC45_KAN620-7_6.tif:0004-0654	0.841	158.049	0	860	49.085	47.154	0.9	132.965	25604	1.124	0.889	0.945	1.2785
534	LRRC45_KAN620-7_6.tif:0005-0856	0.945	158.038	0	1043	76.122	61.746	0.889	149.37	28763	1.134	0.882	0.976	1.43624
										18430.7				0.920311
														0
														0
														0
535	LRRC45_KAN620-8_1.tif:0001-0416	0.519	139.89	0	502	37.014	29.981	0.875	72.647	13989	1.242	0.805	0.952	0.698522
536	LRRC45_KAN620-8_1.tif:0002-0798	0.836	150.149	0	482	81.303	57.522	0.873	125.539	24174	1.448	0.691	0.961	1.2071
537	LRRC45_KAN620-8_1.tif:0003-1128	0.369	26.465	0	163	16.571	81.32	0.924	9.758	1879	1.13	0.885	0.993	0.0938253
538	LRRC45_KAN620-8_1.tif:0004-1205	0.685	75.242	0	322	82.834	86.87	0.961	51.578	9932	1.173	0.853	0.971	0.495941
539	LRRC45_KAN620-8_2.tif:0001-0320	0.784	160.755	0	930	3.353	23.081	0.869	126.058	24274	1.096	0.912	0.947	1.21209
540	LRRC45_KAN620-8_2.tif:0002-0514	0.634	125.336	0	523	39.335	37.039	0.84	79.408	15291	1.346	0.743	0.917	0.763535
541	LRRC45_KAN620-8_2.tif:0003-0633	0.945	136.115	0	817	14.202	45.606	0.787	128.65	24773	1.522	0.657	0.943	1.23701
542	LRRC45_KAN620-8_2.tif:0004-0914	0.758	121.575	0	660	46.105	65.917	0.713	92.178	17750	1.595	0.627	0.856	0.886322
543	LRRC45_KAN620-8_2.tif:0005-0984	0.421	155.753	0	571	11.422	70.947	0.899	65.517	12616	1	1	1	0.629963
544	LRRC45_KAN620-8_2.tif:0006-1151	0.608	142.641	0	677	88.02	82.976	0.924	86.668	16689	1.084	0.923	0.987	0.833342
545	LRRC45_KAN620-8_2.tif:0007-1215	0.514	177.586	0	675	67.887	87.554	0.905	91.301	17581	1.025	0.975	0.995	0.877883
546	LRRC45_KAN620-8_3.tif:0001-0429	0.254	21.633	0	175	80.459	30.951	0.935	5.505	1060	1	1	1	0.0529296
547	LRRC45_KAN620-8_3.tif:0002-0783	0.54	129.538	0	487	43.149	56.411	0.882	69.962	13472	1.147	0.872	0.972	0.672706
548	LRRC45_KAN620-8_3.tif:0003-0877	0.452	54.506	0	234	81.796	63.232	0.951	24.626	4742	1.114	0.897	0.983	0.236785
549	LRRC45_KAN620-8_3.tif:0004-1003	0.488	25.298	0	169	63.56	72.274	0.947	12.349	2378	1.011	0.989	0.969	0.118742
550	LRRC45_KAN620-8_4.tif:0001-0190	0.462	109.067	0	332	42.802	13.725	0.909	50.41	9707	1.115	0.897	0.994	0.484706
551	LRRC45_KAN620-8_4.tif:0002-0769	0.561	145.75	0	530	17.151	55.453	0.863	81.745	15741	1.333	0.75	1	0.786005
552	LRRC45_KAN620-8_4.tif:0003-0878	0.364	27.343	0	92	43.915	63.265	0.911	9.94	1914	1.149	0.87	0.986	0.095573
553	LRRC45_KAN620-8_4.tif:0004-1036	0.878	107.994	0	694	66.235	74.673	0.845	94.78	18251	1.489	0.672	0.942	0.911339
554	LRRC45_KAN620-8_5.tif:0001-0159	0.945	80.626	0	427	83.61	11.497	0.833	76.204	14674	1.283	0.78	0.912	0.732726
555	LRRC45_KAN620-8_5.tif:0002-0219	1.226	106.051	0	761	39.208	15.801	0.944	129.974	25028	1.243	0.805	0.959	1.24974
556	LRRC45_KAN620-8_5.tif:0003-0589	0.696	109.291	0	369	30.45	42.478	0.922	76.054	14645	1.233	0.811	0.975	0.731278
557	LRRC45_KAN620-8_5.tif:0004-0747	0.467	140.789	0	467	67.74	53.867	0.89	65.802	12671	1.111	0.9	1	0.632709
558	LRRC45_KAN620-8_5.tif:0005-0909	0.467	150.256	0	446	26.231	65.542	0.89	70.227	13523	1.111	0.9	1	0.675252
559	LRRC45_KAN620-8_5.tif:0006-1123	0.691	101.85	0	439	58.288	80.942	0.845	70.346	13546	1.274	0.785	0.971	0.676401
560	LRRC45_KAN620-8_6.tif:0001-0044	0.291	39.821	0	256	11.782	3.171	0.92	11.581	2230	1.143	0.875	1	0.111352
561	LRRC45_KAN620-8_6.tif:0002-0111	0.327	135.111	4	303	44.603	7.995	0.937	44.204	8512	1.039	0.963	0.992	0.425035
562	LRRC45_KAN620-8_6.tif:0003-0605	0.987	111.384	0	714	70.893	43.576	0.797	109.903	21163	1.41	0.709	0.936	1.05675
563	LRRC45_KAN620-8_6.tif:0004-0983	0.467	143.644	0	536	12.827	70.874	0.89	67.137	12928	1.111	0.9	1	0.645542
564	LRRC45_KAN620-8_6.tif:0005-1007	0.862	140.783	0	617	76.652	72.575	0.858	121.364	23370	1.283	0.779	0.96	1.16695
										13616.8				0.679935
														0
														0
														0
565	LRRC45_KAN620-9_1.tif:0001-0096	0.618	164.983	0	607	37.869	6.954	0.912	101.957	19633	1.044	0.958	0.992	0.980347
566	LRRC45_KAN620-9_1.tif:0002-0271	0.421	159.963	0	585	19.926	19.565	0.899	67.288	12957	1	1	1	0.64699
567	LRRC45_KAN620-9_1.tif:0003-0463	0.421	156.901	0	526	56.822	33.401	0.899	66	12709	1	1	1	0.634607
568	LRRC45_KAN620-9_1.tif:0004-0620	0.665	165.016	0	736	33.576	44.71	0.916	109.69	21122	1.121	0.892	0.988	1.0547
569	LRRC45_KAN620-9_1.tif:0005-0740	0.961	129.216	0	557	56.878	53.362	0.895	124.142	23905	1.225	0.816	0.951	1.19366
570	LRRC45_KAN620-9_1.tif:0006-0854	0.254	52.673	0	228	17.836	61.578	0.935	13.404	2581	1	1	1	0.128879
571	LRRC45_KAN620-9_1.tif:0007-0876	0.654	159.048	0	700	88.602	63.128	0.928	104.071	20040	1.15	0.869	0.984	1.00067
572	LRRC45_KAN620-9_1.tif:0008-0972	0.618	168.605	0	667	72.571	70.043	0.887	104.195	20064	1.201	0.833	0.996	1.00187
573	LRRC45_KAN620-9_1.tif:0009-1105	0.608	172.803	0	787	62.083	79.666	0.897	104.995	20218	1.084	0.923	0.983	1.00956
574	LRRC45_KAN620-9_2.tif:0001-0083	0.608	167.53	0	659	90.941	5.984	0.897	101.791	19601	1.215	0.823	0.987	0.978749
575	LRRC45_KAN620-9_2.tif:0002-0111	0.665	5.023	0	18	35.42	8.028	0.931	3.339	643	1.302	0.768	0.962	0.0321073
576	LRRC45_KAN620-9_2.tif:0003-0271	1.127	68.677	0	535	18.065	19.548	0.8	77.393	14903	1.463	0.684	0.914	0.744161
577	LRRC45_KAN620-9_2.tif:0004-0364	0.566	158.422	0	479	28.684	26.27	0.897	89.675	17268	1.103	0.907	0.995	0.862254
578	LRRC45_KAN620-9_2.tif:0005-0805	0.717	174.833	0	951	76.708	58.045	0.9	125.295	24127	1.208	0.828	0.986	1.20475
579	LRRC45_KAN620-9_2.tif:0006-1006	0.67	193.775	0	990	54.873	72.493	0.874	129.813	24997	1.3	0.769	0.996	1.24819
580	LRRC45_KAN620-9_2.tif:0007-1027	0.514	155.222	0	444	90.581	74.006	0.905	79.803	15367	1.025	0.975	0.995	0.76733
581	LRRC45_KAN620-9_3.tif:0001-0078	1.246	114.071	0	1201	30.461	5.671	0.702	142.173	27377	1.712	0.584	0.865	1.36703
582	LRRC45_KAN620-9_3.tif:0002-0214	0.556	173.935	0	672	10.302	15.46	0.908	96.65	18611	1.127	0.887	0.986	0.929315
583	LRRC45_KAN620-9_3.tif:0003-0281	1.319	51.799	0	457	35.415	20.329	0.699	68.326	13157	2.108	0.474	0.904	0.656977
584	LRRC45_KAN620-9_3.tif:0004-0360	0.509	135.112	0	498	77.973	25.943	0.925	68.762	13241	1.052	0.95	0.99	0.661171
585	LRRC45_KAN620-9_3.tif:0005-0494	0.571	149.945	0	562	63.092	35.599	0.879	85.656	16494	1.1	0.909	1	0.823605
586	LRRC45_KAN620-9_3.tif:0006-1169	0.561	146.028	0	563	37.005	84.242	0.863	81.901	15771	1.333	0.75	1	0.787503
587	LRRC45_KAN620-9_3.tif:0007-1183	0.618	179.908	0	852	59.384	85.254	0.887	111.18	21409	1.201	0.833	0.996	1.06903
588	LRRC45_KAN620-9_4.tif:0001-0193	0.649	155.088	0	821	88.322	13.912	0.895	100.674	19386	1.123	0.89	0.973	0.968013
589	LRRC45_KAN620-9_4.tif:0002-0369	0.561	168.954	0	714	29.15	26.591	0.916	94.759	18247	1.112	0.9	0.991	0.911139
590	LRRC45_KAN620-9_4.tif:0003-0500	0.421	135.049	0	425	78.081	36.068	0.899	56.808	10939	1	1	1	0.546224
591	LRRC45_KAN620-9_4.tif:0004-0711	0.55	145.726	0	643	5.585	51.237	0.927	80.219	15447	1.145	0.873	0.981	0.771325
592	LRRC45_KAN620-9_4.tif:0005-0934	0.608	149.538	0	458	43.341	67.349	0.924	90.859	17496	1.084	0.923	0.987	0.873639
593	LRRC45_KAN620-9_5.tif:0001-0261	0.846	143.988	0	986	7.555	18.852	0.796	121.883	23470	1.487	0.673	0.937	1.17194
594	LRRC45_KAN620-9_5.tif:0002-0455	0.561	156.315	0	600	71.271	32.825	0.916	87.671	16882	1.112	0.9	0.991	0.84298
595	LRRC45_KAN620-9_5.tif:0003-0463	0.623	168.417	0	538	89.752	33.398	0.894	104.953	20210	1.021	0.979	0.996	1.00916
596	LRRC45_KAN620-9_5.tif:0004-0541	0.561	146.324	0	724	23.277	39.022	0.916	82.067	15803	1.112	0.9	0.991	0.789101
597	LRRC45_KAN620-9_5.tif:0005-0825	0.53	71.069	0	334	27.932	59.481	0.938	37.645	7249	1.413	0.708	0.944	0.361969
598	LRRC45_KAN620-9_5.tif:0006-0945	0.639	146.301	0	612	79.527	68.1	0.932	93.451	17995	1.127	0.888	0.965	0.898556
599	LRRC45_KAN620-9_5.tif:0007-1247	0.514	169.525	0	600	34.482	89.899	0.877	87.157	16783	1.222	0.818	1	0.838036
600	LRRC45_KAN620-9_6.tif:0001-0141	0.561	147.583	0	602	61.362	10.161	0.916	82.774	15939	1.112	0.9	0.991	0.795892
601	LRRC45_KAN620-9_6.tif:0002-0188	1.091	140.914	0	792	32.173	13.534	0.932	153.676	29592	1.212	0.825	0.957	1.47764
602	LRRC45_KAN620-9_6.tif:0003-0692	0.665	177.312	0	820	73.036	49.862	0.916	117.864	22696	1.102	0.908	0.985	1.13329
603	LRRC45_KAN620-9_6.tif:0004-0794	0.753	196.703	0	1133	91.013	57.252	0.911	148.119	28522	1.198	0.835	0.976	1.42421
604	LRRC45_KAN620-9_6.tif:0005-0794	0.571	160.809	0	729	23.889	57.218	0.879	91.862	17689	1.1	0.909	1	0.883276
605	LRRC45_KAN620-9_6.tif:0006-0846	0.8	117.117	0	623	51.455	60.984	0.886	93.664	18036	1.231	0.812	0.966	0.900603
606	LRRC45_KAN620-9_6.tif:0007-1080	0.613	148.534	0	784	76.027	77.829	0.905	91.02	17527	1.205	0.83	0.992	0.875187
										17764.4				0.887039
														0
														0
														0
1	LRRC45_KAN620-10_1.tif:0001-0041	0.509	150.357	0	485	87.485	2.955	0.925	76.521	14735	1.052	0.95	0.99	0.735772
2	LRRC45_KAN620-10_1.tif:0002-0163	0.774	119.926	0	680	83.068	11.785	0.728	92.796	17869	1.688	0.593	0.876	0.892264
3	LRRC45_KAN620-10_1.tif:0003-0178	0.763	162.075	0	748	26.539	12.87	0.877	123.727	23825	1.28	0.782	0.98	1.18967
4	LRRC45_KAN620-10_1.tif:0004-0787	0.561	160.565	0	693	15.524	56.708	0.889	90.054	17341	1.114	0.898	0.991	0.865899
5	LRRC45_KAN620-10_1.tif:0005-0813	0.982	117.984	0	881	56.01	58.637	0.803	115.802	22299	1.389	0.72	0.892	1.11347
6	LRRC45_KAN620-10_1.tif:0006-0887	0.556	167.393	0	712	86.726	63.923	0.936	93.014	17911	1.127	0.887	0.986	0.894361
7	LRRC45_KAN620-10_1.tif:0007-0980	0.421	129.086	0	465	75.487	70.658	0.899	54.3	10456	1	1	1	0.522106
8	LRRC45_KAN620-10_1.tif:0008-1078	0.525	15.337	0	68	63.991	77.724	0.941	8.044	1549	1.236	0.809	0.967	0.0773472
9	LRRC45_KAN620-10_1.tif:0009-1086	0.421	161.654	0	565	27.78	78.297	0.899	67.999	13094	1	1	1	0.653831
10	LRRC45_KAN620-10_1.tif:0010-1151	0.421	153.111	0	557	74.045	82.981	0.899	64.405	12402	1	1	1	0.619277
11	LRRC45_KAN620-10_2.tif:0001-0593	0.576	113.874	0	512	87.345	42.735	0.876	65.641	12640	1.308	0.764	0.965	0.631161
12	LRRC45_KAN620-10_3.tif:0001-0100	0.654	144.73	0	642	6.161	7.206	0.928	94.702	18236	1.15	0.869	0.984	0.91059
13	LRRC45_KAN620-10_3.tif:0002-0273	0.608	162.009	0	693	20.436	19.704	0.924	98.436	18955	1.084	0.923	0.987	0.946492
14	LRRC45_KAN620-10_3.tif:0003-0350	0.364	19.114	0	95	87.809	25.229	0.947	6.948	1338	1.125	0.889	0.986	0.0668112
15	LRRC45_KAN620-10_3.tif:0004-0366	1.039	72.38	0	557	0.818	26.432	0.729	75.176	14476	1.571	0.637	0.895	0.722839
16	LRRC45_KAN620-10_3.tif:0005-0693	0.805	84.639	0	471	17.133	49.943	0.883	68.129	13119	1.277	0.783	0.948	0.655079
17	LRRC45_KAN620-10_3.tif:0006-0846	0.815	143.076	0	751	53.474	60.982	0.831	116.654	22463	1.307	0.765	0.929	1.12166
18	LRRC45_KAN620-10_3.tif:0007-0946	0.862	122.337	0	591	77.357	68.199	0.87	105.462	20308	1.388	0.72	0.93	1.01405
19	LRRC45_KAN620-10_4.tif:0001-0030	0.467	133.8	0	445	2.414	2.162	0.89	62.536	12042	1.111	0.9	1	0.601301
20	LRRC45_KAN620-10_4.tif:0002-0129	0.327	110.016	0	339	49.584	9.292	0.937	35.994	6931	1.039	0.963	0.992	0.34609
21	LRRC45_KAN620-10_4.tif:0003-0275	1.075	104.874	0	687	27.919	19.804	0.795	112.738	21709	1.549	0.645	0.894	1.08401
22	LRRC45_KAN620-10_4.tif:0004-0310	0.602	159.293	0	785	79.553	22.345	0.889	95.959	18478	1.23	0.813	0.983	0.922674
23	LRRC45_KAN620-10_4.tif:0005-0378	0.41	80.519	0	285	41.44	27.244	0.908	33.034	6361	1.252	0.799	0.994	0.317628
24	LRRC45_KAN620-10_4.tif:0006-0552	0.467	172.244	0	535	60.93	39.779	0.89	80.504	15502	1.111	0.9	1	0.774071
25	LRRC45_KAN620-10_4.tif:0007-0564	0.561	142.102	0	523	16.322	40.644	0.916	79.699	15347	1.112	0.9	0.991	0.766331
26	LRRC45_KAN620-10_4.tif:0008-0736	0.758	109.027	0	469	47.455	53.052	0.754	82.665	15918	1.746	0.573	0.915	0.794844
27	LRRC45_KAN620-10_4.tif:0009-0932	0.514	162.737	0	641	66.728	67.16	0.905	83.667	16111	1.025	0.975	0.995	0.804481
28	LRRC45_KAN620-10_4.tif:0010-1149	0.561	154.269	0	588	64.209	82.837	0.916	86.523	16661	1.112	0.9	0.991	0.831944
29	LRRC45_KAN620-10_4.tif:0011-1206	0.467	155.7	0	594	80.675	86.909	0.89	72.772	14013	1.111	0.9	1	0.69972
30	LRRC45_KAN620-10_5.tif:0001-0108	0.561	162.204	0	767	78.729	7.783	0.863	90.974	17518	1.333	0.75	1	0.874737
31	LRRC45_KAN620-10_5.tif:0002-0636	0.831	95.319	0	594	19.39	45.866	0.868	79.201	15251	1.377	0.726	0.941	0.761538
32	LRRC45_KAN620-10_5.tif:0003-0893	0.582	4.696	0	26	12.367	64.396	0.938	2.732	526	1.189	0.841	0.978	0.0262651
33	LRRC45_KAN620-10_5.tif:0004-1019	0.826	113.868	0	652	51.693	73.421	0.883	94.022	18105	1.236	0.809	0.941	0.904048
34	LRRC45_KAN620-10_5.tif:0005-1092	0.369	98.62	0	453	84.995	78.697	0.924	36.362	7002	1.13	0.885	0.993	0.349635
35	LRRC45_KAN620-10_6.tif:0001-0085	0.322	73.919	6	217	63.128	6.125	0.96	23.8	4583	1.081	0.925	0.984	0.228846
36	LRRC45_KAN620-10_6.tif:0002-0103	0.509	148.122	0	611	42.373	7.423	0.925	75.384	14516	1.052	0.95	0.99	0.724837
37	LRRC45_KAN620-10_6.tif:0003-0601	0.602	150.862	0	611	61.908	43.315	0.889	90.88	17500	1.23	0.813	0.983	0.873839
38	LRRC45_KAN620-10_6.tif:0004-0825	0.846	110.319	0	623	86.115	59.489	0.906	93.383	17982	1.184	0.845	0.953	0.897907
39	LRRC45_KAN620-10_6.tif:0005-0937	0.467	140.767	0	518	15.205	67.56	0.89	65.792	12669	1.111	0.9	1	0.632609
40	LRRC45_KAN620-10_6.tif:0006-1018	1.059	116.961	0	1026	58.643	73.396	0.806	123.908	23860	1.389	0.72	0.897	1.19142
41	LRRC45_KAN620-10_6.tif:0007-1068	0.254	35.98	0	97	39.815	77	0.935	9.156	1763	1	1	1	0.088033
										14228.4				0.710475
														0
														0
														0
42	LRRC45_KAN620-11_1.tif:0001-0025	0.769	134.628	0	753	18.148	1.838	0.896	103.473	19925	1.155	0.866	0.943	0.994928
43	LRRC45_KAN620-11_1.tif:0002-0289	1.117	146.112	0	1022	2.701	20.831	0.809	163.138	31414	1.414	0.707	0.905	1.56862
44	LRRC45_KAN620-11_1.tif:0003-0312	0.421	143.951	0	538	35.707	22.52	0.899	60.552	11660	1	1	1	0.582226
45	LRRC45_KAN620-11_1.tif:0004-0433	0.623	200.692	0	972	76.387	31.203	0.869	125.067	24083	1.2	0.833	1	1.20255
46	LRRC45_KAN620-11_1.tif:0005-0713	0.769	147.493	0	912	45.382	51.429	0.852	113.361	21829	1.192	0.839	0.94	1.09
47	LRRC45_KAN620-11_1.tif:0006-0840	0.779	143.28	0	900	77.671	60.599	0.842	111.611	21492	1.391	0.719	0.955	1.07317
48	LRRC45_KAN620-11_1.tif:0007-0881	0.55	126.962	0	576	44.283	63.488	0.899	69.889	13458	1.145	0.873	0.981	0.672007
49	LRRC45_KAN620-11_1.tif:0008-1173	0.291	46.518	0	188	82.369	84.567	0.92	13.528	2605	1.143	0.875	1	0.130077
50	LRRC45_KAN620-11_2.tif:0001-0300	0.41	9.456	0	42	13.007	21.662	0.941	3.879	747	1.001	0.999	0.988	0.0373004
51	LRRC45_KAN620-11_2.tif:0002-0602	0.727	235.45	0	1469	81.614	43.421	0.889	171.182	32963	1.194	0.838	0.989	1.64596
52	LRRC45_KAN620-11_2.tif:0003-0888	1.184	107.43	0	614	56.984	64.055	0.723	127.201	24494	1.751	0.571	0.882	1.22307
53	LRRC45_KAN620-11_2.tif:0004-0916	0.743	118.545	0	679	14.939	66.008	0.844	88.034	16952	1.462	0.684	0.941	0.846475
54	LRRC45_KAN620-11_2.tif:0005-0955	0.644	140.468	0	726	23.075	68.825	0.913	90.454	17418	1.106	0.904	0.976	0.869744
55	LRRC45_KAN620-11_2.tif:0006-1022	0.514	145.505	0	565	79.267	73.652	0.905	74.807	14405	1.025	0.975	0.995	0.719294
56	LRRC45_KAN620-11_3.tif:0001-0160	0.608	174.188	0	770	83.347	11.561	0.924	105.836	20380	1.084	0.923	0.987	1.01765
57	LRRC45_KAN620-11_3.tif:0002-0363	0.421	140.728	0	510	54.876	26.195	0.899	59.197	11399	1	1	1	0.569193
58	LRRC45_KAN620-11_3.tif:0003-0399	0.66	143.551	0	617	1.49	28.762	0.909	94.676	18231	1.098	0.911	0.984	0.91034
59	LRRC45_KAN620-11_3.tif:0004-0602	0.608	168.154	0	785	20.58	43.424	0.924	102.17	19674	1.084	0.923	0.987	0.982394
60	LRRC45_KAN620-11_3.tif:0005-0626	1.148	132.484	0	1062	87.006	45.136	0.892	152.05	29279	1.243	0.804	0.944	1.46201
61	LRRC45_KAN620-11_3.tif:0006-1000	0.846	161.589	0	931	75.525	72.066	0.815	136.782	26339	1.202	0.832	0.911	1.3152
62	LRRC45_KAN620-11_4.tif:0001-0234	0.514	128.485	0	590	60.858	16.899	0.877	66.057	12720	1.222	0.818	1	0.635156
63	LRRC45_KAN620-11_4.tif:0002-0459	0.966	136.392	0	855	79.945	33.071	0.921	131.745	25369	1.119	0.894	0.949	1.26677
64	LRRC45_KAN620-11_4.tif:0003-0551	0.613	159.593	0	649	86.082	39.74	0.905	97.797	18832	1.063	0.941	0.987	0.94035
65	LRRC45_KAN620-11_4.tif:0004-0742	0.717	130.899	0	533	52.664	53.458	0.89	93.809	18064	1.214	0.824	0.939	0.902001
66	LRRC45_KAN620-11_4.tif:0005-0909	0.467	169	0	543	18.16	65.542	0.89	78.988	15210	1.111	0.9	1	0.759491
67	LRRC45_KAN620-11_4.tif:0006-0987	1.075	105.86	0	819	70.773	71.094	0.7	113.797	21913	1.758	0.569	0.861	1.0942
68	LRRC45_KAN620-11_5.tif:0001-0107	0.935	151.517	0	1036	25.085	7.74	0.697	141.633	27273	1.612	0.621	0.845	1.36184
69	LRRC45_KAN620-11_5.tif:0002-0363	0.571	147.309	0	804	91.813	26.151	0.819	84.15	16204	1.739	0.575	0.991	0.809125
70	LRRC45_KAN620-11_5.tif:0003-0625	0.421	148.333	0	447	73.108	45.076	0.899	62.396	12015	1	1	1	0.599953
71	LRRC45_KAN620-11_5.tif:0004-0627	0.55	114.83	0	448	34.287	45.19	0.837	63.211	12172	1.369	0.731	0.938	0.607792
72	LRRC45_KAN620-11_5.tif:0005-0661	0.613	187.941	0	896	42.268	47.672	0.905	115.168	22177	1.063	0.941	0.987	1.10738
73	LRRC45_KAN620-11_5.tif:0006-0709	0.66	165.748	0	786	17.303	51.137	0.909	109.316	21050	1.137	0.879	0.984	1.0511
74	LRRC45_KAN620-11_5.tif:0007-0722	0.774	140.913	0	923	64.558	52.078	0.866	109.035	20996	1.309	0.764	0.983	1.04841
75	LRRC45_KAN620-11_5.tif:0008-0794	0.966	113.941	0	992	79.704	57.242	0.79	110.058	21193	1.519	0.659	0.899	1.05824
76	LRRC45_KAN620-11_5.tif:0009-1184	0.405	29.269	0	286	3.78	85.369	0.929	11.856	2283	1.026	0.975	0.981	0.113998
77	LRRC45_KAN620-11_6.tif:0001-0124	0.566	148.44	0	696	45.685	8.975	0.897	84.025	16180	1.103	0.907	0.995	0.807926
78	LRRC45_KAN620-11_6.tif:0002-0190	0.867	176.192	0	1208	25.168	13.74	0.835	152.803	29424	1.206	0.829	0.928	1.46925
79	LRRC45_KAN620-11_6.tif:0003-0244	0.613	158.364	0	770	74.58	17.583	0.905	97.044	18687	1.2	0.834	0.992	0.93311
80	LRRC45_KAN620-11_6.tif:0004-0351	0.561	168.435	0	704	32.218	25.336	0.889	94.469	18191	1.114	0.898	0.991	0.908343
81	LRRC45_KAN620-11_6.tif:0005-0620	0.561	161.269	0	735	12.467	44.715	0.916	90.449	17417	1.112	0.9	0.991	0.869694
82	LRRC45_KAN620-11_6.tif:0006-0680	0.665	171.023	0	839	8.102	49.009	0.916	113.683	21891	1.121	0.892	0.988	1.0931
83	LRRC45_KAN620-11_6.tif:0007-0807	0.748	169.569	0	772	62.043	58.179	0.881	126.806	24418	1.506	0.664	0.983	1.21928
84	LRRC45_KAN620-11_6.tif:0008-0816	0.644	131.194	0	370	47.66	58.782	0.888	84.482	16268	1.119	0.894	0.969	0.81232
										18780.2				0.937764
														0
														0
														0
85	LRRC45_KAN620-12_1.tif:0001-0110	0.447	26.43	0	104	24.184	7.926	0.94	11.804	2273	1.13	0.885	0.977	0.113499
86	LRRC45_KAN620-12_1.tif:0002-0185	0.592	14.982	0	50	67.43	13.385	0.9	8.87	1708	1.086	0.921	0.979	0.0852866
87	LRRC45_KAN620-12_1.tif:0003-0549	0.711	14.584	0	92	86.263	39.565	0.87	10.376	1998	1.399	0.715	0.989	0.0997674
88	LRRC45_KAN620-12_1.tif:0004-0931	0.291	23.482	0	88	9.729	67.127	0.92	6.829	1315	1.143	0.875	1	0.0656627
89	LRRC45_KAN620-12_1.tif:0005-1024	0.291	26.786	0	143	44.355	73.793	0.92	7.79	1500	1.143	0.875	1	0.0749004
90	LRRC45_KAN620-12_2.tif:0001-0022	0.369	18.944	0	107	39.387	1.582	0.924	6.985	1345	1.13	0.885	0.993	0.0671607
91	LRRC45_KAN620-12_2.tif:0002-0658	0.364	11.3	0	66	82.073	47.454	0.947	4.108	791	1.125	0.889	0.986	0.0394975
92	LRRC45_KAN620-12_2.tif:0003-0708	0.254	22.837	0	88	43.202	51.057	0.935	5.811	1119	1	1	1	0.0558757
93	LRRC45_KAN620-12_2.tif:0004-0814	0.452	16.08	0	113	9.955	58.705	0.919	7.265	1399	1.137	0.88	0.989	0.0698571
94	LRRC45_KAN620-12_2.tif:0005-0921	0.254	13.551	0	43	34.122	66.407	0.935	3.448	664	1	1	1	0.0331559
95	LRRC45_KAN620-12_2.tif:0006-1048	0.602	24.164	0	112	69.503	75.562	0.864	14.556	2803	1.444	0.692	0.996	0.139964
96	LRRC45_KAN620-12_3.tif:0001-0690	0.322	25.339	0	107	83.233	49.724	0.96	8.158	1571	1.081	0.925	0.984	0.0784457
97	LRRC45_KAN620-12_3.tif:0002-0967	0.322	20.032	0	58	44.968	69.685	0.96	6.45	1242	1.081	0.925	0.984	0.0620176
98	LRRC45_KAN620-12_4.tif:0001-0302	0.732	34.709	0	236	36.542	21.823	0.909	25.415	4894	1.287	0.777	0.969	0.244375
99	LRRC45_KAN620-12_4.tif:0002-0811	0.571	39.445	0	111	69.061	58.47	0.894	22.533	4339	1.463	0.684	0.973	0.216662
100	LRRC45_KAN620-12_4.tif:0003-0862	0.364	25.057	0	117	52.823	62.155	0.947	9.109	1754	1.146	0.873	0.986	0.0875836
101	LRRC45_KAN620-12_4.tif:0004-1046	0.914	26.46	0	117	65.371	75.315	0.778	24.184	4657	1.153	0.867	0.914	0.232541
102	LRRC45_KAN620-12_4.tif:0005-1145	0.369	38.549	0	129	73.652	82.553	0.924	14.214	2737	1.13	0.885	0.993	0.136668
103	LRRC45_KAN620-12_5.tif:0001-0262	0.41	50.051	0	177	10.846	18.917	0.941	20.534	3954	1.064	0.94	0.988	0.197438
104	LRRC45_KAN620-12_5.tif:0002-0792	0.493	29.316	0	132	25.226	57.078	0.957	14.463	2785	1.073	0.932	0.974	0.139065
105	LRRC45_KAN620-12_5.tif:0003-0795	0.369	31.944	0	82	72.355	57.331	0.924	11.778	2268	1.13	0.885	0.993	0.113249
106	LRRC45_KAN620-12_5.tif:0004-1031	0.447	18.023	0	51	67.691	74.298	0.94	8.049	1550	1.112	0.9	0.977	0.0773971
107	LRRC45_KAN620-12_6.tif:0001-0044	0.254	41.469	0	97	85.72	3.207	0.935	10.552	2032	1	1	1	0.101465
108	LRRC45_KAN620-12_6.tif:0002-0764	0.254	15.449	0	69	61.29	55.093	0.935	3.931	757	1	1	1	0.0377998
109	LRRC45_KAN620-12_6.tif:0003-0937	0.327	10.444	0	54	44.571	67.56	0.9	3.417	658	1.286	0.778	1	0.0328563
110	LRRC45_KAN620-12_6.tif:0004-1025	0.602	24.966	0	146	79.159	73.892	0.943	15.039	2896	1.061	0.942	0.983	0.144608
										2115.73				0.105646
														0
														0
														0
111	LRRC45_KAN620-13_1.tif:0001-0345	0.66	165.677	0	620	75.963	24.906	0.909	109.269	21041	1.137	0.879	0.984	1.05065
112	LRRC45_KAN620-13_1.tif:0002-0429	0.592	140.623	0	384	29.956	30.939	0.9	83.251	16031	1.136	0.88	0.97	0.800486
113	LRRC45_KAN620-13_1.tif:0003-0466	0.821	125.918	0	867	8.257	33.618	0.79	103.318	19895	1.447	0.691	0.895	0.99343
114	LRRC45_KAN620-13_1.tif:0004-0665	0.322	58.952	0	114	85.539	47.922	0.96	18.981	3655	1.081	0.925	0.984	0.182507
115	LRRC45_KAN620-13_1.tif:0005-0711	0.467	141.7	0	552	27.096	51.273	0.89	66.228	12753	1.111	0.9	1	0.636804
116	LRRC45_KAN620-13_1.tif:0006-0990	0.841	140.63	0	767	52.369	71.402	0.837	118.31	22782	1.239	0.807	0.942	1.13759
117	LRRC45_KAN620-13_1.tif:0007-1161	0.457	131.727	0	300	13.036	83.707	0.899	60.199	11592	1.117	0.895	0.989	0.578831
118	LRRC45_KAN620-13_2.tif:0001-0140	1.589	141.359	0	1473	31.063	10.206	0.701	224.635	43256	1.614	0.62	0.85	2.15993
119	LRRC45_KAN620-13_2.tif:0002-0255	0.561	147.352	0	682	69.607	18.418	0.889	82.644	15914	1.114	0.898	0.991	0.794644
120	LRRC45_KAN620-13_2.tif:0003-0387	0.322	103.468	0	403	24.141	27.889	0.96	33.314	6415	1.081	0.925	0.984	0.320324
121	LRRC45_KAN620-13_2.tif:0004-0415	0.831	176	0	1097	88.894	29.923	0.868	146.239	28160	1.258	0.795	0.947	1.40613
122	LRRC45_KAN620-13_2.tif:0005-0463	1.018	97.158	0	474	1.334	33.4	0.805	98.893	19043	1.586	0.63	0.956	0.950886
123	LRRC45_KAN620-13_2.tif:0006-0614	0.675	184.185	0	756	55.093	44.247	0.905	124.345	23944	1.1	0.909	0.992	1.19561
124	LRRC45_KAN620-13_2.tif:0007-0738	0.883	163.094	0	911	86.189	53.215	0.922	143.985	27726	1.28	0.781	0.977	1.38446
125	LRRC45_KAN620-13_2.tif:0008-0825	1.366	103.133	0	934	63.746	59.508	0.758	140.859	27124	1.671	0.599	0.872	1.3544
126	LRRC45_KAN620-13_2.tif:0009-0966	1.226	77.75	0	734	1.633	69.63	0.768	95.289	18349	1.607	0.622	0.915	0.916232
127	LRRC45_KAN620-13_2.tif:0010-1101	0.862	91.584	0	425	84.928	79.382	0.712	78.951	15203	1.859	0.538	0.874	0.759141
128	LRRC45_KAN620-13_3.tif:0001-0131	0.561	154.556	0	432	14.407	9.476	0.916	86.684	16692	1.1	0.909	0.991	0.833492
129	LRRC45_KAN620-13_3.tif:0002-0290	0.254	76.245	0	193	11.35	20.934	0.935	19.402	3736	1	1	1	0.186552
130	LRRC45_KAN620-13_3.tif:0003-0429	0.758	137.13	0	842	33.105	30.967	0.84	103.972	20021	1.13	0.885	0.93	0.999721
131	LRRC45_KAN620-13_3.tif:0004-0781	0.187	97.333	0	378	91.953	56.318	0.808	18.197	3504	2.25	0.444	1	0.174967
132	LRRC45_KAN620-13_3.tif:0005-0832	0.732	192.844	0	929	69.505	59.998	0.895	141.207	27191	1.181	0.846	0.993	1.35775
133	LRRC45_KAN620-13_3.tif:0006-1063	0.753	112.883	0	685	51.101	76.59	0.878	85.001	16368	1.343	0.745	0.935	0.817314
134	LRRC45_KAN620-13_3.tif:0007-1164	0.421	162.247	0	477	23.313	83.918	0.899	68.248	13142	1	1	1	0.656228
135	LRRC45_KAN620-13_4.tif:0001-0150	0.67	162.287	0	668	29.735	10.807	0.898	108.719	20935	1.096	0.912	0.989	1.04536
136	LRRC45_KAN620-13_4.tif:0002-0377	0.628	122.917	0	431	41.938	27.203	0.866	77.238	14873	1.388	0.72	0.968	0.742663
137	LRRC45_KAN620-13_4.tif:0003-0383	0.909	152.36	0	612	73.261	27.573	0.835	138.465	26663	1.405	0.712	0.954	1.33138
138	LRRC45_KAN620-13_4.tif:0004-0528	0.561	150.435	0	584	35.455	38.086	0.916	84.373	16247	1.112	0.9	0.991	0.811272
139	LRRC45_KAN620-13_4.tif:0005-0593	0.467	154.356	0	562	15.782	42.77	0.89	72.143	13892	1.111	0.9	1	0.693678
140	LRRC45_KAN620-13_4.tif:0006-0735	0.327	58.111	0	266	11.742	52.971	0.937	19.012	3661	1.039	0.963	0.992	0.182807
141	LRRC45_KAN620-13_4.tif:0007-0867	0.613	157.051	0	721	63.2	62.479	0.905	96.239	18532	1.205	0.83	0.992	0.92537
142	LRRC45_KAN620-13_4.tif:0008-0907	0.945	225.951	0	1222	77.339	65.441	0.901	213.558	41123	1.151	0.869	0.948	2.05342
143	LRRC45_KAN620-13_5.tif:0001-0713	0.795	123.307	0	705	11.422	51.438	0.838	97.974	18866	1.423	0.703	0.962	0.942048
144	LRRC45_KAN620-13_5.tif:0002-0947	0.608	153.017	0	726	24.283	68.241	0.897	92.973	17903	1.215	0.823	0.987	0.893962
145	LRRC45_KAN620-13_5.tif:0003-0972	0.763	157.116	0	565	50.844	70.048	0.948	119.941	23096	1.093	0.915	0.977	1.15327
146	LRRC45_KAN620-13_5.tif:0004-1028	0.862	108.084	0	555	19.395	74.129	0.879	93.175	17942	1.088	0.919	0.957	0.895909
147	LRRC45_KAN620-13_5.tif:0005-1151	0.831	112.681	0	649	69.51	83.007	0.819	93.627	18029	1.292	0.774	0.914	0.900253
148	LRRC45_KAN620-13_5.tif:0006-1185	0.421	147.901	0	528	82.477	85.431	0.899	62.214	11980	1	1	1	0.598205
149	LRRC45_KAN620-13_6.tif:0001-0058	0.717	121.065	0	583	76.692	4.212	0.914	86.762	16707	1.331	0.751	0.948	0.834241
150	LRRC45_KAN620-13_6.tif:0002-0423	0.592	49.377	0	220	86.443	30.526	0.927	29.232	5629	1.022	0.979	0.97	0.281076
151	LRRC45_KAN620-13_6.tif:0003-0429	0.878	108.621	0	517	37.287	30.908	0.894	95.331	18357	1.29	0.775	0.971	0.916632
152	LRRC45_KAN620-13_6.tif:0004-0651	0.898	164.775	0	1106	77.581	46.873	0.807	148.036	28506	1.423	0.703	0.948	1.42341
153	LRRC45_KAN620-13_6.tif:0005-0713	0.608	178.957	0	709	57.066	51.378	0.897	108.734	20938	1.205	0.83	0.987	1.04551
154	LRRC45_KAN620-13_6.tif:0006-0984	0.727	118.943	0	561	25.925	70.909	0.806	86.476	16652	1.432	0.698	0.912	0.831495
155	LRRC45_KAN620-13_6.tif:0007-0994	0.613	170.271	0	778	53.754	71.625	0.879	104.341	20092	1.209	0.827	0.992	1.00327
156	LRRC45_KAN620-13_6.tif:0008-1251	0.639	132.894	0	496	38.964	90.131	0.88	84.887	16346	1.162	0.86	0.965	0.816215
157	LRRC45_KAN620-13_6.tif:0009-1250	0.561	147.194	0	604	59.092	90.115	0.863	82.555	15897	1.333	0.75	1	0.793795
										18221.3				0.909858
														0
														0
														0
158	LRRC45_KAN620-14_1.tif:0001-0092	0.608	155.521	0	552	7.669	6.671	0.924	94.495	18196	1.084	0.923	0.987	0.908592
159	LRRC45_KAN620-14_1.tif:0002-0172	0.649	147.384	0	780	74.125	12.403	0.895	95.673	18423	1.169	0.855	0.977	0.919927
160	LRRC45_KAN620-14_1.tif:0003-0382	0.841	95.778	0	499	4.864	27.56	0.739	80.577	15516	1.964	0.509	0.947	0.77477
161	LRRC45_KAN620-14_1.tif:0004-0418	0.514	169.293	0	677	69.394	30.126	0.905	87.037	16760	1.025	0.975	0.995	0.836888
162	LRRC45_KAN620-14_1.tif:0005-0537	0.872	77.821	0	518	46.729	38.725	0.736	67.895	13074	1.627	0.615	0.87	0.652832
163	LRRC45_KAN620-14_1.tif:0006-0562	0.924	210.652	0	1356	80.315	40.528	0.933	194.722	37496	1.186	0.843	0.962	1.87231
164	LRRC45_KAN620-14_1.tif:0007-0571	0.421	161.222	0	444	68.064	41.184	0.899	67.817	13059	1	1	1	0.652083
165	LRRC45_KAN620-14_1.tif:0008-1017	0.649	152.008	0	868	49.794	73.322	0.92	98.675	19001	1.169	0.855	0.98	0.948789
166	LRRC45_KAN620-14_1.tif:0009-1029	0.914	87.438	0	752	4.193	74.187	0.702	79.917	15389	1.9	0.526	0.871	0.768429
167	LRRC45_KAN620-14_2.tif:0001-0082	0.467	158.522	0	432	40.32	5.909	0.89	74.091	14267	1.111	0.9	1	0.712403
168	LRRC45_KAN620-14_2.tif:0002-0351	0.421	158.346	0	548	20.862	25.33	0.899	66.607	12826	1	1	1	0.640449
169	LRRC45_KAN620-14_2.tif:0003-0369	0.467	145.844	0	547	51.67	26.627	0.89	68.165	13126	1.111	0.9	1	0.655429
170	LRRC45_KAN620-14_2.tif:0004-0605	0.514	157.636	0	567	82.621	43.634	0.877	81.044	15606	1.222	0.818	1	0.779264
171	LRRC45_KAN620-14_2.tif:0005-0948	0.602	158.948	0	768	32.173	68.35	0.916	95.751	18438	1.105	0.905	0.983	0.920676
172	LRRC45_KAN620-14_3.tif:0001-0407	0.909	100.303	0	486	32.984	29.373	0.767	91.155	17553	1.558	0.642	0.893	0.876485
173	LRRC45_KAN620-14_3.tif:0002-0807	0.94	121.127	0	931	29.379	58.148	0.884	113.855	21924	1.338	0.747	0.976	1.09474
174	LRRC45_KAN620-14_3.tif:0003-0888	0.976	119.564	0	800	81.991	64.007	0.824	116.732	22478	1.447	0.691	0.926	1.12241
175	LRRC45_KAN620-14_3.tif:0004-0931	1.091	117.695	0	1011	65.066	67.052	0.83	128.354	24716	1.113	0.898	0.911	1.23416
176	LRRC45_KAN620-14_3.tif:0005-1054	0.898	136.642	0	839	57.601	75.948	0.885	122.761	23639	1.156	0.865	0.961	1.18038
177	LRRC45_KAN620-14_4.tif:0001-0147	1.07	109.039	0	762	11.258	10.66	0.67	116.648	22462	1.839	0.544	0.849	1.12161
178	LRRC45_KAN620-14_4.tif:0002-0193	0.254	11.347	0	47	79.018	13.944	0.935	2.887	556	1	1	1	0.0277631
179	LRRC45_KAN620-14_4.tif:0003-0375	0.254	13.286	0	157	32.248	27.06	0.935	3.381	651	1	1	1	0.0325068
180	LRRC45_KAN620-14_4.tif:0004-0403	0.327	16.159	0	63	73.509	29.046	0.937	5.287	1018	1.039	0.963	0.992	0.0508324
181	LRRC45_KAN620-14_4.tif:0005-0755	0.364	127.614	0	312	77.389	54.444	0.947	46.39	8933	1.125	0.889	0.986	0.446057
182	LRRC45_KAN620-14_4.tif:0006-0801	0.421	175.037	0	442	46.805	57.759	0.899	73.628	14178	1	1	1	0.707959
183	LRRC45_KAN620-14_4.tif:0007-1035	0.556	157.682	0	630	18.74	74.624	0.908	87.619	16872	1.127	0.887	0.986	0.84248
184	LRRC45_KAN620-14_4.tif:0008-1250	0.628	95.678	0	563	91.705	90.126	0.856	60.121	11577	1.297	0.771	0.938	0.578082
185	LRRC45_KAN620-14_5.tif:0001-0139	0.815	21.592	0	123	26.985	10.009	0.965	17.605	3390	1.109	0.901	0.952	0.169275
186	LRRC45_KAN620-14_5.tif:0002-0501	1.527	105.33	0	1017	78.408	36.167	0.804	160.816	30967	1.707	0.586	0.936	1.54629
187	LRRC45_KAN620-14_5.tif:0003-0574	1.158	101.852	0	778	33.135	41.394	0.652	117.952	22713	2.075	0.482	0.843	1.13414
188	LRRC45_KAN620-14_5.tif:0004-0756	1.184	91.689	0	706	31.432	54.495	0.762	108.563	20905	2.068	0.484	0.974	1.04386
189	LRRC45_KAN620-14_5.tif:0005-0929	0.587	23.124	0	170	83.957	66.95	0.947	13.57	2613	1.201	0.833	0.974	0.130477
190	LRRC45_KAN620-14_5.tif:0006-1116	0.519	138.28	0	489	11.026	80.423	0.886	71.811	13828	1	1	1	0.690482
191	LRRC45_KAN620-14_5.tif:0007-1175	0.509	141.449	0	617	30.339	84.675	0.925	71.987	13862	1.052	0.95	0.99	0.69218
192	LRRC45_KAN620-14_6.tif:0001-0351	0.815	103.07	0	588	36.068	25.278	0.785	84.036	16182	1.659	0.603	0.918	0.808026
193	LRRC45_KAN620-14_6.tif:0002-0923	0.587	111.248	0	462	87.992	66.522	0.892	65.283	12571	1.249	0.801	0.97	0.627716
194	LRRC45_KAN620-14_6.tif:0003-1062	0.493	8.663	0	34	17.07	76.529	0.957	4.274	823	1.073	0.932	0.979	0.0410954
195	LRRC45_KAN620-14_6.tif:0004-1091	0.467	140.678	0	574	57.038	78.621	0.89	65.75	12661	1.111	0.9	1	0.63221
										15217.1				0.759844
														0
														0
														0
196	LRRC45_KAN620-15_1.tif:0001-0210	0.914	122.33	0	730	5.872	15.17	0.88	111.808	21530	1.251	0.799	0.951	1.07507
197	LRRC45_KAN620-15_1.tif:0002-0437	0.841	57.642	0	216	74.287	31.443	0.849	48.494	9338	1.382	0.724	0.928	0.46628
198	LRRC45_KAN620-15_1.tif:0003-0484	0.467	136.733	0	521	13.26	34.915	0.89	63.907	12306	1.111	0.9	1	0.614483
199	LRRC45_KAN620-15_1.tif:0004-0520	1.085	110.488	0	854	38.191	37.479	0.675	119.92	23092	1.663	0.601	0.821	1.15307
200	LRRC45_KAN620-15_1.tif:0005-0797	1.262	88.21	0	588	28.919	57.49	0.837	111.315	21435	1.749	0.572	0.953	1.07033
201	LRRC45_KAN620-15_1.tif:0006-0801	0.608	155.051	0	585	49.006	57.731	0.897	94.209	18141	1.205	0.83	0.987	0.905846
202	LRRC45_KAN620-15_1.tif:0007-0986	1.07	112.286	0	619	77.139	71.105	0.903	120.123	23131	1.36	0.735	0.969	1.15501
203	LRRC45_KAN620-15_1.tif:0008-1237	1.106	115.319	0	804	46.457	89.13	0.849	127.559	24563	1.622	0.616	0.97	1.22652
204	LRRC45_KAN620-15_2.tif:0001-0526	0.743	99.063	0	532	51.073	37.912	0.875	73.566	14166	1.319	0.758	0.966	0.70736
205	LRRC45_KAN620-15_2.tif:0002-0576	1.288	146.222	0	844	87.974	41.545	0.864	188.319	36263	1.384	0.723	0.941	1.81074
206	LRRC45_KAN620-15_2.tif:0003-0770	0.441	14.235	0	64	9.905	55.493	0.929	6.284	1210	1.15	0.87	0.971	0.0604197
207	LRRC45_KAN620-15_2.tif:0004-1063	1.096	96.085	0	732	20.355	76.629	0.8	105.286	20274	1.247	0.802	0.909	1.01235
208	LRRC45_KAN620-15_2.tif:0005-1100	0.364	13.957	0	57	54.307	79.277	0.911	5.074	977	1.149	0.87	0.986	0.0487852
209	LRRC45_KAN620-15_3.tif:0001-0087	1.002	130.389	0	645	14.165	6.276	0.925	130.686	25165	1.167	0.857	0.946	1.25658
210	LRRC45_KAN620-15_3.tif:0002-0163	1.215	85.714	0	568	33.092	11.797	0.697	104.159	20057	1.717	0.582	0.857	1.00152
211	LRRC45_KAN620-15_3.tif:0003-0251	0.364	6.357	0	30	46.978	18.124	0.947	2.311	445	1.125	0.889	0.986	0.0222205
212	LRRC45_KAN620-15_3.tif:0004-0566	0.66	167.614	0	841	63.809	40.786	0.884	110.547	21287	1.142	0.875	0.981	1.06294
213	LRRC45_KAN620-15_3.tif:0005-0683	0.623	29.458	0	104	11.263	49.228	0.909	18.358	3535	1.104	0.906	0.96	0.176515
214	LRRC45_KAN620-15_3.tif:0006-1128	0.535	9.087	0	67	14.057	81.326	0.803	4.861	936	1.726	0.58	0.907	0.0467379
215	LRRC45_KAN620-15_4.tif:0001-0482	0.67	161.891	0	640	19.707	34.738	0.923	108.454	20884	1.093	0.915	0.989	1.04281
216	LRRC45_KAN620-15_4.tif:0002-0504	1.21	105.12	0	724	60.873	36.32	0.694	127.196	24493	1.849	0.541	0.866	1.22302
217	LRRC45_KAN620-15_4.tif:0003-0755	0.691	7.436	0	46	6.425	54.39	0.826	5.136	989	1.544	0.648	0.911	0.0493844
218	LRRC45_KAN620-15_4.tif:0004-0937	0.867	117.509	0	786	59.558	67.507	0.732	101.91	19624	1.629	0.614	0.859	0.979898
219	LRRC45_KAN620-15_4.tif:0005-1152	0.493	23.642	0	112	22.892	83.053	0.897	11.664	2246	1.234	0.81	0.979	0.112151
220	LRRC45_KAN620-15_5.tif:0001-0284	0.961	124.032	0	638	82.188	20.506	0.844	119.162	22946	1.544	0.648	0.995	1.14578
221	LRRC45_KAN620-15_5.tif:0002-0499	0.509	28.388	0	228	45.832	35.96	0.925	14.447	2782	1.052	0.95	0.99	0.138915
222	LRRC45_KAN620-15_5.tif:0003-0704	0.691	5.466	0	30	52.434	50.757	0.915	3.775	727	1.247	0.802	0.978	0.0363017
223	LRRC45_KAN620-15_5.tif:0004-0711	0.956	131.022	0	647	42.703	51.239	0.932	125.196	24108	1.187	0.842	0.956	1.2038
224	LRRC45_KAN620-15_5.tif:0005-0810	1.418	99.832	0	737	79.62	58.414	0.746	141.534	27254	1.92	0.521	0.918	1.36089
225	LRRC45_KAN620-15_5.tif:0006-0927	1.21	112.536	0	905	10.159	66.79	0.653	136.17	26221	1.769	0.565	0.82	1.30931
226	LRRC45_KAN620-15_5.tif:0007-1073	1.189	120.921	0	788	68.107	77.368	0.916	143.803	27691	1.316	0.76	0.942	1.38271
227	LRRC45_KAN620-15_5.tif:0008-1255	1.184	106.039	0	757	79.496	90.427	0.841	125.555	24177	1.511	0.662	0.942	1.20725
228	LRRC45_KAN620-15_6.tif:0001-0166	1.168	90.351	0	630	45.857	11.973	0.682	105.571	20329	1.796	0.557	0.843	1.0151
229	LRRC45_KAN620-15_6.tif:0002-0292	0.582	31.366	0	157	23.098	21.082	0.967	18.244	3513	1.098	0.91	0.97	0.175417
230	LRRC45_KAN620-15_6.tif:0003-0545	1.283	121.818	0	806	35.596	39.298	0.783	156.257	30089	1.772	0.564	0.925	1.50245
231	LRRC45_KAN620-15_6.tif:0004-0553	1.215	130.662	0	1257	65.005	39.9	0.697	158.78	30575	1.98	0.505	0.88	1.52672
232	LRRC45_KAN620-15_6.tif:0005-0930	1.049	142.797	0	1027	87.138	67.025	0.866	149.796	28845	1.343	0.745	0.971	1.44034
233	LRRC45_KAN620-15_6.tif:0006-1074	0.535	52.553	0	245	10.457	77.435	0.96	28.111	5413	1.096	0.913	0.972	0.270291
234	LRRC45_KAN620-15_6.tif:0007-1175	0.504	48.691	0	169	65.037	84.717	0.916	24.527	4723	1.221	0.819	0.99	0.235837
										16419.7				0.819897
235	LRRC45_KAN620-16_1.tif:0001-0076	0.717	149.71	0	681	70.95	5.515	0.924	107.29	20660	1.177	0.85	0.982	1.03163
236	LRRC45_KAN620-16_1.tif:0002-0546	0.608	165.812	0	738	77.865	39.383	0.847	100.747	19400	1.444	0.692	1	0.968712
237	LRRC45_KAN620-16_1.tif:0003-0578	0.421	156.198	0	409	35.563	41.689	0.899	65.704	12652	1	1	1	0.63176
238	LRRC45_KAN620-16_1.tif:0004-0677	0.665	174.172	0	801	46.482	48.817	0.916	115.776	22294	1.102	0.907	0.985	1.11322
239	LRRC45_KAN620-16_1.tif:0005-0992	0.623	194.525	0	911	82.297	71.487	0.869	121.224	23343	1.2	0.833	1	1.1656
240	LRRC45_KAN620-16_2.tif:0001-0073	0.623	203	0	853	79.126	5.261	0.869	126.505	24360	1.2	0.833	1	1.21638
241	LRRC45_KAN620-16_2.tif:0002-0122	0.805	184.755	0	959	30.576	8.787	0.915	148.716	28637	1.186	0.843	0.969	1.42995
242	LRRC45_KAN620-16_2.tif:0003-0370	0.421	122.333	0	425	51.417	26.7	0.899	51.459	9909	1	1	1	0.494792
243	LRRC45_KAN620-16_2.tif:0004-0515	0.732	120.95	0	406	76.622	37.14	0.909	88.564	17054	1.207	0.828	0.956	0.851568
244	LRRC45_KAN620-16_2.tif:0005-0630	0.514	153.354	0	676	42.049	45.436	0.877	78.842	15182	1.222	0.818	1	0.758092
245	LRRC45_KAN620-16_2.tif:0006-0992	0.909	162.789	0	950	67.55	71.531	0.809	147.942	28488	1.354	0.739	0.916	1.42251
246	LRRC45_KAN620-16_2.tif:0007-1035	0.608	162.897	0	696	85.897	74.594	0.924	98.976	19059	1.205	0.83	0.987	0.951685
247	LRRC45_KAN620-16_3.tif:0001-0095	0.789	129.993	0	801	31.131	6.882	0.884	102.611	19759	1.275	0.784	0.993	0.986639
248	LRRC45_KAN620-16_3.tif:0002-0254	0.421	143.42	0	540	53.867	18.34	0.899	60.329	11617	1	1	1	0.580079
249	LRRC45_KAN620-16_3.tif:0003-0279	0.706	176.169	0	883	85.002	20.149	0.887	124.423	23959	1.22	0.819	0.975	1.19636
250	LRRC45_KAN620-16_3.tif:0004-0557	0.291	82.554	0	357	81.576	40.175	0.92	24.008	4623	1.143	0.875	1	0.230843
251	LRRC45_KAN620-16_3.tif:0005-0659	0.888	132.327	0	791	14.472	47.531	0.875	117.511	22628	1.312	0.762	0.95	1.1299
252	LRRC45_KAN620-16_3.tif:0006-0743	0.711	170.453	0	793	35.275	53.579	0.918	121.27	23352	1.191	0.84	0.979	1.16605
253	LRRC45_KAN620-16_3.tif:0007-0770	1.205	136.306	0	999	73.347	55.441	0.822	164.223	31623	1.347	0.743	0.947	1.57905
254	LRRC45_KAN620-16_3.tif:0008-0934	0.706	122.007	0	626	43.563	67.299	0.877	86.17	16593	1.334	0.75	0.944	0.828549
255	LRRC45_KAN620-16_3.tif:0009-1116	0.597	153.939	0	800	5.945	80.459	0.935	91.934	17703	1.128	0.887	0.983	0.883975
256	LRRC45_KAN620-16_4.tif:0001-0280	0.753	187.455	0	1105	31.9	20.171	0.887	141.155	27181	1.314	0.761	0.976	1.35725
257	LRRC45_KAN620-16_4.tif:0002-0476	0.711	240.788	0	1489	87.8	34.328	0.893	171.312	32988	1.217	0.822	0.982	1.64721
258	LRRC45_KAN620-16_4.tif:0003-0572	0.608	159.376	0	705	44.538	41.212	0.897	96.837	18647	1.205	0.83	0.987	0.931112
259	LRRC45_KAN620-16_4.tif:0004-0732	0.66	178.622	0	921	9.839	52.747	0.909	117.807	22685	1.137	0.879	0.984	1.13274
260	LRRC45_KAN620-16_4.tif:0005-0872	0.904	119.466	0	736	45.95	62.826	0.823	107.95	20787	1.37	0.73	0.911	1.03797
261	LRRC45_KAN620-16_4.tif:0006-0908	0.608	151.658	0	658	79.345	65.436	0.897	92.147	17744	1.215	0.823	0.987	0.886022
262	LRRC45_KAN620-16_4.tif:0007-1003	0.514	144.596	0	567	8.684	72.316	0.877	74.34	14315	1.222	0.818	1	0.7148
263	LRRC45_KAN620-16_4.tif:0008-1114	0.737	122.599	0	738	35.912	80.284	0.869	90.407	17409	1.139	0.878	0.953	0.869295
264	LRRC45_KAN620-16_4.tif:0009-1124	0.561	169.176	0	691	91.124	80.999	0.916	94.884	18271	1.112	0.9	0.991	0.912337
265	LRRC45_KAN620-16_4.tif:0010-1269	0.421	166.457	0	611	20.358	91.485	0.899	70.019	13483	1	1	1	0.673255
266	LRRC45_KAN620-16_5.tif:0001-0257	0.872	146.524	0	752	15.01	18.575	0.889	127.835	24616	1.266	0.79	0.971	1.22917
267	LRRC45_KAN620-16_5.tif:0002-0282	0.826	208.132	0	982	33.58	20.325	0.915	171.857	33093	1.173	0.852	0.975	1.65245
268	LRRC45_KAN620-16_5.tif:0003-0352	0.576	130.009	0	565	25.759	25.408	0.902	74.942	14431	1.206	0.829	0.957	0.720592
269	LRRC45_KAN620-16_5.tif:0004-0590	0.613	156.585	0	583	20.682	42.512	0.905	95.954	18477	1.2	0.834	0.992	0.922624
270	LRRC45_KAN620-16_5.tif:0005-0632	1.033	121.181	0	829	90.362	45.596	0.872	125.233	24115	1.38	0.725	0.964	1.20415
271	LRRC45_KAN620-16_5.tif:0006-0723	0.421	156.444	0	544	57.254	52.138	0.899	65.808	12672	1	1	1	0.632759
272	LRRC45_KAN620-16_5.tif:0007-0920	0.561	169.463	0	646	84.675	66.334	0.916	95.045	18302	1.112	0.9	0.991	0.913885
273	LRRC45_KAN620-16_5.tif:0008-0944	0.737	127.394	0	625	41.766	68.086	0.734	93.944	18090	1.722	0.581	0.893	0.903299
274	LRRC45_KAN620-16_6.tif:0001-0030	0.561	146.954	0	666	11.782	2.168	0.916	82.42	15871	1.189	0.841	0.991	0.792497
275	LRRC45_KAN620-16_6.tif:0002-0299	0.961	161.135	0	1186	31.615	21.589	0.829	154.808	29810	1.249	0.8	0.907	1.48852
276	LRRC45_KAN620-16_6.tif:0003-0431	0.789	138.737	0	656	73.094	31.119	0.875	109.513	21088	1.37	0.73	0.962	1.053
277	LRRC45_KAN620-16_6.tif:0004-0771	1.091	127.943	0	986	50.083	55.556	0.827	139.529	26868	1.241	0.806	0.968	1.34162
278	LRRC45_KAN620-16_6.tif:0005-0804	0.701	173.519	0	959	2.337	57.98	0.904	121.649	23425	1.241	0.806	0.978	1.1697
279	LRRC45_KAN620-16_6.tif:0006-0858	0.852	153.665	0	1070	43.14	61.835	0.889	130.872	25201	1.169	0.856	0.956	1.25838
280	LRRC45_KAN620-16_6.tif:0007-1037	0.846	129.92	0	786	70.328	74.798	0.705	109.975	21177	1.536	0.651	0.879	1.05744
281	LRRC45_KAN620-16_6.tif:0008-1053	0.556	161.514	0	855	35.74	75.922	0.908	89.748	17282	1.127	0.887	0.986	0.862953
282	LRRC45_KAN620-16_6.tif:0009-1134	0.364	5.043	0	22	5.117	81.756	0.947	1.833	353	1.146	0.873	0.986	0.0176266
										20026.6				1

## Sheet: IF condition
Exp. number	Cell line	Gene induced	Culture condition, fixation condition	rabbit-Alexa488	mouse IgG1-Alexa568	mouse IgG2b-Alexa647	Nuclear stain	Date	Replicate
KAN620-1	RPE-BFP-Cas9 pMCB306 (pool)		Serum starved for 24 hours. Fixed in 100% methanol at -20C for 5 minutes.	LRRC45, anti-rabbit, gift from Dr. Pereira, 1:1000	CEP170, Invitrogen, 41-3200, 1:1000	Ac-Tub, 6B-11, Santa Cruz, 1:1000	DAPI	No.6	2021-03-04
KAN620-2	RPE-BFP-Cas9 CEP164KO (pool)		Serum starved for 24 hours. Fixed in 100% methanol at -20C for 5 minutes.	LRRC45, anti-rabbit, gift from Dr. Pereira, 1:1000	CEP170, Invitrogen, 41-3200, 1:1000	Ac-Tub, 6B-11, Santa Cruz, 1:1000	DAPI	No.6	2021-03-04
KAN620-3	RPE-BFP-Cas9 CEP83 KO (pool)		Serum starved for 24 hours. Fixed in 100% methanol at -20C for 5 minutes.	LRRC45, anti-rabbit, gift from Dr. Pereira, 1:1000	CEP170, Invitrogen, 41-3200, 1:1000	Ac-Tub, 6B-11, Santa Cruz, 1:1000	DAPI	No.6	2021-03-04
KAN620-4	RPE-BFP-Cas9 SCLT1 KO (pool)		Serum starved for 24 hours. Fixed in 100% methanol at -20C for 5 minutes.	LRRC45, anti-rabbit, gift from Dr. Pereira, 1:1000	CEP170, Invitrogen, 41-3200, 1:1000	Ac-Tub, 6B-11, Santa Cruz, 1:1000	DAPI	No.6	2021-03-04
KAN620-5	RPE-BFP-Cas9 FBF1 KO (pool)		Serum starved for 24 hours. Fixed in 100% methanol at -20C for 5 minutes.	LRRC45, anti-rabbit, gift from Dr. Pereira, 1:1000	CEP170, Invitrogen, 41-3200, 1:1000	Ac-Tub, 6B-11, Santa Cruz, 1:1000	DAPI	No.6	2021-03-04
KAN620-6	RPE-BFP-Cas9 CEP89KO (pool)		Serum starved for 24 hours. Fixed in 100% methanol at -20C for 5 minutes.	LRRC45, anti-rabbit, gift from Dr. Pereira, 1:1000	CEP170, Invitrogen, 41-3200, 1:1000	Ac-Tub, 6B-11, Santa Cruz, 1:1000	DAPI	No.6	2021-03-04
KAN620-7	RPE-BFP-Cas9 CCDC92 KO (pool)		Serum starved for 24 hours. Fixed in 100% methanol at -20C for 5 minutes.	LRRC45, anti-rabbit, gift from Dr. Pereira, 1:1000	CEP170, Invitrogen, 41-3200, 1:1000	Ac-Tub, 6B-11, Santa Cruz, 1:1000	DAPI	No.6	2021-03-04
KAN620-8	RPE-BFP-Cas9 ANKRD26 KO (pool)		Serum starved for 24 hours. Fixed in 100% methanol at -20C for 5 minutes.	LRRC45, anti-rabbit, gift from Dr. Pereira, 1:1000	CEP170, Invitrogen, 41-3200, 1:1000	Ac-Tub, 6B-11, Santa Cruz, 1:1000	DAPI	No.6	2021-03-04
KAN620-9	RPE-BFP-Cas9 TTBK2 KO (pool)		Serum starved for 24 hours. Fixed in 100% methanol at -20C for 5 minutes.	LRRC45, anti-rabbit, gift from Dr. Pereira, 1:1000	CEP170, Invitrogen, 41-3200, 1:1000	Ac-Tub, 6B-11, Santa Cruz, 1:1000	DAPI	No.6	2021-03-04
KAN620-10	RPE-BFP-Cas9 INPP5E KO (pool)		Serum starved for 24 hours. Fixed in 100% methanol at -20C for 5 minutes.	LRRC45, anti-rabbit, gift from Dr. Pereira, 1:1000	CEP170, Invitrogen, 41-3200, 1:1000	Ac-Tub, 6B-11, Santa Cruz, 1:1000	DAPI	No.6	2021-03-04
KAN620-11	RPE-BFP-Cas9 Kiz KO (pool)		Serum starved for 24 hours. Fixed in 100% methanol at -20C for 5 minutes.	LRRC45, anti-rabbit, gift from Dr. Pereira, 1:1000	CEP170, Invitrogen, 41-3200, 1:1000	Ac-Tub, 6B-11, Santa Cruz, 1:1000	DAPI	No.6	2021-03-04
KAN620-12	RPE-BFP-Cas9 LRRC45 KO (pool)		Serum starved for 24 hours. Fixed in 100% methanol at -20C for 5 minutes.	LRRC45, anti-rabbit, gift from Dr. Pereira, 1:1000	CEP170, Invitrogen, 41-3200, 1:1000	Ac-Tub, 6B-11, Santa Cruz, 1:1000	DAPI	No.6	2021-03-04
KAN620-13	RPE-BFP-Cas9 NCS1 KO (pool)		Serum starved for 24 hours. Fixed in 100% methanol at -20C for 5 minutes.	LRRC45, anti-rabbit, gift from Dr. Pereira, 1:1000	CEP170, Invitrogen, 41-3200, 1:1000	Ac-Tub, 6B-11, Santa Cruz, 1:1000	DAPI	No.6	2021-03-04
KAN620-14	RPE-BFP-Cas9 C3orf14 KO (pool)		Serum starved for 24 hours. Fixed in 100% methanol at -20C for 5 minutes.	LRRC45, anti-rabbit, gift from Dr. Pereira, 1:1000	CEP170, Invitrogen, 41-3200, 1:1000	Ac-Tub, 6B-11, Santa Cruz, 1:1000	DAPI	No.6	2021-03-04
KAN620-15	RPE-BFP-Cas9 FOP KO (pool)		Serum starved for 24 hours. Fixed in 100% methanol at -20C for 5 minutes.	LRRC45, anti-rabbit, gift from Dr. Pereira, 1:1000	CEP170, Invitrogen, 41-3200, 1:1000	Ac-Tub, 6B-11, Santa Cruz, 1:1000	DAPI	No.6	2021-03-04
KAN620-16	RPE-BFP-Cas9 sgSafe (pool)		Serum starved for 24 hours. Fixed in 100% methanol at -20C for 5 minutes.	LRRC45, anti-rabbit, gift from Dr. Pereira, 1:1000	CEP170, Invitrogen, 41-3200, 1:1000	Ac-Tub, 6B-11, Santa Cruz, 1:1000	DAPI	No.6	2021-03-04
