# Supplementary material for: A hierarchical pathway for assembly of the distal appendages that organize primary cilia
Source: eLife. 2025 Jan 30;14:e85999. doi: 10.7554/eLife.85999 (PMC11984956; doi:10.7554/eLife.85999)
Supplement: Figure 2—source data 11. [file elife-85999-fig2-data11.xlsx]

## Sheet: Raw Data
	Label	Area	Mean	Min	Max	X	Y	Circ	IntDen	RawIntDen	AR	Round	Solidity
582	PIDD1_KAN626-1_1.tif:0001-0091	0.721	18.018	0	163	124.283	10.385	0.92	12.998	1009	1.143	0.875	1
583	PIDD1_KAN626-1_1.tif:0002-0265	1.275	83.323	0	491	101.928	30.083	0.905	106.266	8249	1.025	0.975	0.995
584	PIDD1_KAN626-1_1.tif:0003-0324	1.971	71.222	0	445	120.925	36.768	0.791	140.378	10897	1.5	0.666	0.933
585	PIDD1_KAN626-1_1.tif:0004-0461	1.391	39.176	0	243	5.969	52.324	0.916	54.505	4231	1.099	0.91	0.991
586	PIDD1_KAN626-1_1.tif:0005-0593	1.713	71.594	0	478	141.124	67.327	0.915	122.665	9522	1.186	0.843	0.974
587	PIDD1_KAN626-1_1.tif:0006-0605	1.275	99.657	0	463	124.401	68.673	0.905	127.096	9866	1.025	0.975	0.995
588	PIDD1_KAN626-1_1.tif:0007-0616	1.804	68.357	0	426	58.233	69.982	0.857	123.283	9570	1.183	0.846	0.946
589	PIDD1_KAN626-1_1.tif:0008-0753	2.048	95.748	0	831	25.413	85.463	0.915	196.119	15224	1.177	0.85	0.975
590	PIDD1_KAN626-1_1.tif:0009-0915	2.138	58.307	0	551	139.116	103.833	0.83	124.687	9679	1.462	0.684	0.927
591	PIDD1_KAN626-1_1.tif:0010-0922	1.159	76.822	0	322	37.852	104.647	0.89	89.068	6914	1.111	0.9	1
592	PIDD1_KAN626-1_1.tif:0011-1122	1.159	80.678	0	204	137.165	127.347	0.89	93.538	7261	1.111	0.9	1
593	PIDD1_KAN626-1_1.tif:0012-1159	3.053	53.895	0	484	95.648	131.635	0.833	164.545	12773	1.368	0.731	0.937
594	PIDD1_KAN626-1_1.tif:0013-1171	0.631	21.714	0	51	17.422	132.965	0.935	13.707	1064	1	1	1
595	PIDD1_KAN626-1_2.tif:0001-0099	2.216	54.43	0	363	126.987	11.254	0.86	120.604	9362	1.477	0.677	0.961
596	PIDD1_KAN626-1_2.tif:0002-0223	1.52	73.669	0	298	89.5	25.362	0.931	111.985	8693	1.022	0.979	0.987
597	PIDD1_KAN626-1_2.tif:0003-0328	1.147	49.494	0	246	87.401	37.28	0.909	56.746	4405	1.115	0.897	0.994
598	PIDD1_KAN626-1_2.tif:0004-0449	1.275	76.99	0	325	138.362	50.967	0.905	98.189	7622	1.025	0.975	0.995
599	PIDD1_KAN626-1_2.tif:0005-0488	1.546	73.192	0	259	101.417	55.375	0.909	113.145	8783	1.206	0.829	0.956
600	PIDD1_KAN626-1_2.tif:0006-0536	1.752	56.228	0	507	114.589	60.897	0.887	98.511	7647	1.22	0.819	0.975
601	PIDD1_KAN626-1_2.tif:0007-0555	1.726	50.373	0	239	48.163	63.015	0.864	86.955	6750	1.474	0.678	0.95
602	PIDD1_KAN626-1_2.tif:0008-0649	1.726	75.843	0	490	14.956	73.722	0.922	130.922	10163	1.189	0.841	0.975
603	PIDD1_KAN626-1_2.tif:0009-0682	1.404	86.477	0	449	72.068	77.459	0.897	121.428	9426	1.103	0.907	0.995
604	PIDD1_KAN626-1_2.tif:0010-0841	2.293	81.77	0	426	110.603	95.508	0.955	187.501	14555	1.181	0.847	0.967
605	PIDD1_KAN626-1_2.tif:0011-0958	2.28	57.565	0	365	99.065	108.801	0.856	131.257	10189	1.451	0.689	0.932
606	PIDD1_KAN626-1_2.tif:0012-1039	2.126	100.479	0	317	90.282	117.991	0.904	213.575	16579	1.061	0.943	0.991
607	PIDD1_KAN626-1_2.tif:0013-1161	2.293	57.927	0	484	72.52	131.773	0.797	132.829	10311	1.535	0.652	0.906
608	PIDD1_KAN626-1_2.tif:0014-1163	1.559	67.463	0	414	22.259	132.056	0.866	105.158	8163	1.372	0.729	0.964
609	PIDD1_KAN626-1_2.tif:0015-1210	1.585	79.764	0	547	61.281	137.344	0.847	126.388	9811	1.285	0.778	0.921
610	PIDD1_KAN626-1_2.tif:0016-1275	0.541	14.905	0	57	1.759	144.713	0.943	8.064	626	1.167	0.857	1
611	PIDD1_KAN626-1_3.tif:0001-0004	0.631	57.265	0	445	132.351	0.506	0.84	36.148	2806	1.993	0.502	0.99
612	PIDD1_KAN626-1_3.tif:0002-0111	1.585	42.87	0	254	29.182	12.669	0.932	67.928	5273	1.12	0.893	0.972
613	PIDD1_KAN626-1_3.tif:0003-0189	2.692	57.153	0	648	106.45	21.552	0.747	153.879	11945	1.726	0.579	0.917
614	PIDD1_KAN626-1_3.tif:0004-0200	2.048	83.969	0	575	73.974	22.747	0.915	171.991	13351	1.012	0.988	0.972
615	PIDD1_KAN626-1_3.tif:0005-0415	2.138	67.289	0	659	26.688	47.217	0.757	143.895	11170	1.674	0.598	0.941
616	PIDD1_KAN626-1_3.tif:0006-0489	2.435	41.931	0	248	90.239	55.563	0.865	102.092	7925	1.116	0.896	0.929
617	PIDD1_KAN626-1_3.tif:0007-0617	2.319	56.606	0	485	27.775	70.035	0.871	131.257	10189	1.338	0.747	0.94
618	PIDD1_KAN626-1_3.tif:0008-0631	1.391	89.574	0	236	140.92	71.609	0.889	124.623	9674	1.114	0.898	0.991
619	PIDD1_KAN626-1_3.tif:0009-0660	1.739	76.637	0	596	107.896	74.94	0.826	133.28	10346	1.384	0.723	0.934
620	PIDD1_KAN626-1_3.tif:0010-0700	1.752	94.419	0	617	81.667	79.503	0.911	165.421	12841	1.23	0.813	0.982
621	PIDD1_KAN626-1_3.tif:0011-0768	2.242	70.351	0	527	68.335	87.231	0.882	157.692	12241	1.457	0.687	0.93
622	PIDD1_KAN626-1_3.tif:0012-0807	1.907	51.635	0	407	48.172	91.622	0.822	98.446	7642	1.562	0.64	0.914
623	PIDD1_KAN626-1_3.tif:0013-1073	1.262	88.214	0	535	7.832	121.786	0.925	111.367	8645	1.052	0.95	0.99
624	PIDD1_KAN626-1_3.tif:0014-1097	1.494	69.621	0	241	74.395	124.57	0.916	104.037	8076	1.061	0.943	0.979
625	PIDD1_KAN626-1_3.tif:0015-1123	1.159	69.633	0	296	35.696	127.461	0.89	80.733	6267	1.111	0.9	1
626	PIDD1_KAN626-1_3.tif:0016-1139	2.177	45.331	0	313	136.352	129.303	0.788	98.691	7661	1.879	0.532	0.971
627	PIDD1_KAN626-1_4.tif:0001-0015	2.95	96.69	0	327	49.606	1.785	0.897	285.239	22142	1.276	0.784	0.96
628	PIDD1_KAN626-1_4.tif:0002-0032	1.907	68.784	0	396	102.535	3.675	0.852	131.141	10180	1.27	0.787	0.934
629	PIDD1_KAN626-1_4.tif:0003-0044	1.404	81.174	0	196	53.964	4.989	0.897	113.982	8848	1.103	0.907	0.995
630	PIDD1_KAN626-1_4.tif:0004-0052	1.932	67.38	0	576	111.065	5.958	0.885	130.201	10107	1.464	0.683	0.962
631	PIDD1_KAN626-1_4.tif:0005-0063	1.907	88.169	0	236	57.78	7.2	0.906	168.101	13049	1.301	0.768	0.983
632	PIDD1_KAN626-1_4.tif:0006-0102	1.881	70.616	0	561	4.089	11.616	0.84	132.816	10310	1.395	0.717	0.939
633	PIDD1_KAN626-1_4.tif:0007-0116	2.023	72.459	0	739	42.465	13.164	0.767	146.548	11376	1.463	0.684	0.89
634	PIDD1_KAN626-1_4.tif:0008-0386	1.546	109.983	0	592	45.688	43.872	0.894	170.02	13198	1.021	0.979	0.996
635	PIDD1_KAN626-1_4.tif:0009-0500	1.456	68.858	0	226	121.213	56.753	0.866	100.237	7781	1.279	0.782	0.97
636	PIDD1_KAN626-1_4.tif:0010-0505	1.018	17.772	0	154	68.963	57.364	0.908	18.087	1404	1.058	0.946	0.988
637	PIDD1_KAN626-1_4.tif:0011-0507	1.52	87.864	0	584	88.644	57.545	0.905	133.563	10368	1.205	0.83	0.992
638	PIDD1_KAN626-1_4.tif:0012-0650	1.713	50.398	0	299	26.285	73.84	0.867	86.35	6703	1.263	0.792	0.964
639	PIDD1_KAN626-1_4.tif:0013-0673	1.816	85.631	0	284	19.194	76.398	0.895	155.54	12074	1.051	0.952	0.993
640	PIDD1_KAN626-1_4.tif:0014-0843	2.113	65.409	0	441	105.397	95.688	0.889	138.188	10727	1.34	0.746	0.962
641	PIDD1_KAN626-1_4.tif:0015-0897	1.778	59.507	0	247	29.673	101.792	0.89	105.789	8212	1.311	0.763	0.952
642	PIDD1_KAN626-1_4.tif:0016-1093	1.919	83.725	0	603	47.201	124.092	0.902	160.706	12475	1.238	0.808	0.952
643	PIDD1_KAN626-1_4.tif:0017-1140	1.288	76.37	0	422	12.599	129.39	0.886	98.382	7637	1	1	1
644	PIDD1_KAN626-1_5.tif:0001-0057	1.765	93.599	0	573	75.027	6.482	0.943	165.189	12823	1.017	0.983	0.979
645	PIDD1_KAN626-1_5.tif:0002-0140	2.486	75.373	0	945	111.835	15.878	0.838	187.398	14547	1.326	0.754	0.908
646	PIDD1_KAN626-1_5.tif:0003-0151	2.744	90.573	0	1088	48.8	17.168	0.886	248.524	19292	1.155	0.866	0.949
647	PIDD1_KAN626-1_5.tif:0004-0182	1.919	68.49	0	474	128.575	20.716	0.858	131.463	10205	1.211	0.826	0.94
648	PIDD1_KAN626-1_5.tif:0005-0207	1.34	47.077	0	246	31.562	23.541	0.969	63.072	4896	1.108	0.903	0.977
649	PIDD1_KAN626-1_5.tif:0006-0228	1.894	111.891	0	856	23.153	25.963	0.923	211.887	16448	1.096	0.913	0.974
650	PIDD1_KAN626-1_5.tif:0007-0298	2.177	98.473	0	504	68.38	33.804	0.963	214.386	16642	1.119	0.894	0.977
651	PIDD1_KAN626-1_5.tif:0008-0385	2.216	68.872	0	479	94.361	43.709	0.84	152.603	11846	1.402	0.713	0.948
652	PIDD1_KAN626-1_5.tif:0009-0389	1.52	113.305	0	984	44.081	44.222	0.905	172.236	13370	1.06	0.944	0.992
653	PIDD1_KAN626-1_5.tif:0010-0419	2.332	49.243	0	372	18.251	47.647	0.864	114.82	8913	1.235	0.81	0.963
654	PIDD1_KAN626-1_5.tif:0011-0516	1.275	84.848	0	437	7.269	58.561	0.905	108.211	8400	1.025	0.975	0.995
655	PIDD1_KAN626-1_5.tif:0012-0597	2.68	127.293	0	678	54.218	67.832	0.892	341.083	26477	1.336	0.748	0.972
656	PIDD1_KAN626-1_5.tif:0013-0602	1.52	81.153	0	498	57.02	68.397	0.905	123.36	9576	1.06	0.944	0.992
657	PIDD1_KAN626-1_5.tif:0014-0632	1.623	80.698	0	487	134.554	71.732	0.928	130.987	10168	1.15	0.869	0.984
658	PIDD1_KAN626-1_5.tif:0015-0661	1.043	66.037	0	251	89.608	75.08	0.899	68.907	5349	1	1	1
659	PIDD1_KAN626-1_5.tif:0016-0750	2.937	96.145	0	1116	124.395	85.147	0.841	282.392	21921	1.293	0.774	0.927
660	PIDD1_KAN626-1_5.tif:0017-0814	1.804	111.229	0	882	90.633	92.441	0.889	200.602	15572	1.187	0.843	0.989
661	PIDD1_KAN626-1_5.tif:0018-0842	1.404	83.56	0	467	43.986	95.562	0.897	117.332	9108	1.103	0.907	0.995
662	PIDD1_KAN626-1_5.tif:0019-0916	1.043	69.21	0	218	76.556	104.023	0.899	72.218	5606	1	1	1
663	PIDD1_KAN626-1_5.tif:0020-0961	1.262	75.408	0	403	9.307	109.074	0.925	95.2	7390	1.052	0.95	0.99
664	PIDD1_KAN626-1_5.tif:0021-1056	1.868	60.414	0	406	96.834	119.917	0.887	112.849	8760	1.296	0.771	0.97
665	PIDD1_KAN626-1_5.tif:0022-1225	1.52	80.254	0	408	86.155	139.038	0.905	121.995	9470	1.2	0.834	0.992
666	PIDD1_KAN626-1_5.tif:0023-1242	1.739	62.348	0	551	52.948	141.046	0.88	108.43	8417	1.21	0.826	0.971
667	PIDD1_KAN626-1_5.tif:0024-1262	1.159	70.778	0	290	107.768	143.237	0.89	82.06	6370	1.111	0.9	1
										9925.03
668	PIDD1_KAN626-2_1.tif:0001-0061	1.52	60.822	0	235	74.456	6.924	0.905	92.456	7177	1.205	0.83	0.992
669	PIDD1_KAN626-2_1.tif:0002-0091	1.469	66.333	0	344	130.646	10.348	0.927	97.416	7562	1.2	0.833	0.979
670	PIDD1_KAN626-2_1.tif:0003-0156	2.113	52.854	0	373	36.885	17.73	0.868	111.663	8668	1.49	0.671	0.97
671	PIDD1_KAN626-2_1.tif:0004-0160	2.319	61.078	0	523	49.375	18.215	0.871	141.627	10994	1.408	0.71	0.938
672	PIDD1_KAN626-2_1.tif:0005-0276	1.597	38.71	0	197	112.14	31.392	0.967	61.835	4800	1.151	0.868	0.976
673	PIDD1_KAN626-2_1.tif:0006-0325	1.494	38.793	0	264	64.756	36.958	0.943	57.97	4500	1.061	0.942	0.983
674	PIDD1_KAN626-2_1.tif:0007-0494	1.52	63.102	0	272	83.371	56.121	0.931	95.921	7446	1.022	0.979	0.987
675	PIDD1_KAN626-2_1.tif:0008-0505	1.546	55.717	0	258	125.663	57.399	0.859	86.131	6686	1.257	0.796	0.956
676	PIDD1_KAN626-2_1.tif:0009-0575	1.804	75.743	0	461	132.21	65.217	0.857	136.603	10604	1.37	0.73	0.959
677	PIDD1_KAN626-2_1.tif:0010-0782	1.919	68.309	0	520	48.027	88.77	0.858	131.116	10178	1.381	0.724	0.952
678	PIDD1_KAN626-2_1.tif:0011-0803	0.631	23.694	0	126	98.007	91.197	0.935	14.956	1161	1	1	1
679	PIDD1_KAN626-2_1.tif:0012-0912	1.791	62.576	0	440	37.673	103.51	0.82	112.05	8698	1.482	0.675	0.911
680	PIDD1_KAN626-2_1.tif:0013-1004	1.958	62.967	0	306	102.28	113.979	0.92	123.296	9571	1.236	0.809	0.959
681	PIDD1_KAN626-2_1.tif:0014-1017	1.765	68.584	0	469	82.851	115.424	0.893	121.042	9396	1.398	0.715	0.989
682	PIDD1_KAN626-2_1.tif:0015-1082	1.688	51	0	293	132.27	122.851	0.877	86.066	6681	1.304	0.767	0.96
683	PIDD1_KAN626-2_1.tif:0016-1214	1.52	65.305	0	434	55.658	137.851	0.931	99.271	7706	1.018	0.982	0.987
684	PIDD1_KAN626-2_2.tif:0001-0129	1.688	27.153	0	131	30.178	14.647	0.953	45.822	3557	1.08	0.926	0.963
685	PIDD1_KAN626-2_2.tif:0002-0284	1.945	52.795	0	323	95.11	32.282	0.839	102.697	7972	1.451	0.689	0.924
686	PIDD1_KAN626-2_2.tif:0003-0418	1.417	41.955	0	146	46.786	47.426	0.922	59.452	4615	1.273	0.785	0.969
687	PIDD1_KAN626-2_2.tif:0004-0467	1.25	66.557	0	350	62.709	53.073	0.916	83.168	6456	1.22	0.82	0.99
688	PIDD1_KAN626-2_2.tif:0005-0483	0.721	17.036	0	83	130.582	54.821	0.92	12.29	954	1.143	0.875	1
689	PIDD1_KAN626-2_2.tif:0006-0821	1.043	61.481	0	248	62.255	93.24	0.899	64.154	4980	1	1	1
690	PIDD1_KAN626-2_2.tif:0007-0865	2.048	52.83	0	328	18.2	98.249	0.833	108.211	8400	1.459	0.685	0.922
691	PIDD1_KAN626-2_2.tif:0008-1011	1.25	49.546	0	155	80.703	114.743	0.916	61.912	4806	1.076	0.93	0.985
692	PIDD1_KAN626-2_2.tif:0009-1086	1.031	28.113	0	193	100.612	123.323	0.919	28.972	2249	1.031	0.97	0.994
693	PIDD1_KAN626-2_2.tif:0010-1208	0.915	18.662	0	105	27.586	137.158	0.924	17.069	1325	1.13	0.885	0.993
694	PIDD1_KAN626-2_3.tif:0001-0076	1.353	44.152	0	167	58.012	8.678	0.948	59.722	4636	1.122	0.892	0.981
695	PIDD1_KAN626-2_3.tif:0002-0132	1.159	67	0	323	134.781	14.982	0.89	77.68	6030	1.111	0.9	1
696	PIDD1_KAN626-2_3.tif:0003-0180	0.812	70.889	0	250	106.684	20.436	0.937	57.532	4466	1.039	0.963	0.992
697	PIDD1_KAN626-2_3.tif:0004-0278	1.159	88.689	0	481	126.553	31.61	0.89	102.826	7982	1.111	0.9	1
698	PIDD1_KAN626-2_3.tif:0005-0289	0.631	16.959	0	90	65.773	32.858	0.935	10.705	831	1	1	1
699	PIDD1_KAN626-2_3.tif:0006-0314	1.907	63.804	0	309	94.941	35.678	0.896	121.647	9443	1.228	0.814	0.94
700	PIDD1_KAN626-2_3.tif:0007-0358	1.958	50.434	0	415	58.668	40.693	0.833	98.755	7666	1.427	0.701	0.962
701	PIDD1_KAN626-2_3.tif:0008-0447	1.134	67.477	0	273	106.792	50.8	0.899	76.495	5938	1.117	0.895	0.989
702	PIDD1_KAN626-2_3.tif:0009-0466	1.585	60.496	0	246	71.097	52.87	0.932	95.857	7441	1.097	0.912	0.965
703	PIDD1_KAN626-2_3.tif:0010-0573	1.005	46.923	0	125	113.563	65.098	0.963	47.149	3660	1.032	0.969	0.981
704	PIDD1_KAN626-2_3.tif:0011-0707	1.031	36.475	0	139	49.259	80.245	0.887	37.59	2918	1.25	0.8	1
705	PIDD1_KAN626-2_3.tif:0012-0747	0.721	21.804	0	123	69.065	84.785	0.92	15.729	1221	1.143	0.875	1
706	PIDD1_KAN626-2_3.tif:0013-0819	1.237	25.5	0	178	100.572	92.966	0.936	31.536	2448	1.007	0.993	0.98
707	PIDD1_KAN626-2_3.tif:0014-0853	0.631	5.939	0	27	8.683	96.872	0.935	3.749	291	1	1	1
708	PIDD1_KAN626-2_3.tif:0015-0872	1.791	50.626	0	259	137.794	98.976	0.86	90.652	7037	1.4	0.714	0.996
709	PIDD1_KAN626-2_3.tif:0016-0925	0.824	10.203	0	84	49.373	104.988	0.914	8.412	653	1	1	1
710	PIDD1_KAN626-2_3.tif:0017-0974	1.224	60.432	0	250	83.316	110.551	0.897	73.957	5741	1.119	0.894	0.974
711	PIDD1_KAN626-2_3.tif:0018-1021	1.378	76.794	0	350	32.466	115.945	0.908	105.853	8217	1.127	0.887	0.986
712	PIDD1_KAN626-2_3.tif:0019-1062	0.631	13.122	0	57	78.372	120.594	0.935	8.283	643	1	1	1
713	PIDD1_KAN626-2_4.tif:0001-0013	1.095	17.024	0	116	51.43	1.538	0.898	18.641	1447	1.381	0.724	0.983
714	PIDD1_KAN626-2_4.tif:0002-0131	1.778	67.478	0	507	61.665	14.914	0.9	119.96	9312	1.192	0.839	0.986
715	PIDD1_KAN626-2_4.tif:0003-0209	1.043	93.506	0	797	43.3	23.778	0.899	97.57	7574	1	1	1
716	PIDD1_KAN626-2_4.tif:0004-0298	1.121	39.644	0	146	125.753	33.885	0.951	44.431	3449	1.146	0.872	0.983
717	PIDD1_KAN626-2_4.tif:0005-0307	1.327	38.262	0	227	58.39	34.831	0.96	50.769	3941	1.106	0.904	0.972
718	PIDD1_KAN626-2_4.tif:0006-0420	1.005	61.167	0	207	82.35	47.721	0.963	61.461	4771	1.032	0.969	0.981
719	PIDD1_KAN626-2_4.tif:0007-0629	1.121	39.736	0	192	126.547	71.434	0.919	44.534	3457	1.107	0.903	0.983
720	PIDD1_KAN626-2_4.tif:0008-0649	1.121	26.333	0	175	93.801	73.666	0.889	29.513	2291	1.375	0.727	0.994
721	PIDD1_KAN626-2_4.tif:0009-0656	1.121	25.264	0	82	17.408	74.472	0.919	28.315	2198	1.137	0.88	0.989
722	PIDD1_KAN626-2_4.tif:0010-0752	1.121	28.92	0	126	133.131	85.414	0.951	32.412	2516	1.146	0.872	0.983
723	PIDD1_KAN626-2_4.tif:0011-0858	1.018	34.481	0	103	59.883	97.43	0.908	35.091	2724	1.058	0.946	0.988
724	PIDD1_KAN626-2_4.tif:0012-0899	1.159	87.389	0	730	61.687	102.037	0.89	101.319	7865	1.111	0.9	1
725	PIDD1_KAN626-2_4.tif:0013-0919	1.739	71.711	0	497	97.015	104.373	0.904	124.713	9681	1.177	0.85	0.978
726	PIDD1_KAN626-2_4.tif:0014-0984	1.726	44.716	0	346	28.911	111.675	0.864	77.19	5992	1.339	0.747	0.934
727	PIDD1_KAN626-2_4.tif:0015-1020	0.824	27.562	0	131	119.289	115.77	0.914	22.724	1764	1	1	1
728	PIDD1_KAN626-2_4.tif:0016-1059	0.631	13.816	0	48	25.254	120.253	0.935	8.721	677	1	1	1
729	PIDD1_KAN626-2_4.tif:0017-1102	1.43	54.559	0	333	64.932	125.07	0.902	78.015	6056	1.265	0.79	0.961
730	PIDD1_KAN626-2_4.tif:0018-1139	1.159	66.822	0	350	96.475	129.333	0.89	77.474	6014	1.111	0.9	1
731	PIDD1_KAN626-2_4.tif:0019-1218	1.378	58.925	0	235	69.334	138.269	0.845	81.223	6305	1.349	0.741	0.943
732	PIDD1_KAN626-2_5.tif:0001-0078	1.469	40.026	0	216	47.373	8.906	0.985	58.782	4563	1.02	0.981	0.974
733	PIDD1_KAN626-2_5.tif:0002-0291	1.34	27.404	0	135	95.124	33.089	0.939	36.714	2850	1.139	0.878	0.972
734	PIDD1_KAN626-2_5.tif:0003-0300	1.662	84.798	0	542	127.295	34.045	0.923	140.919	10939	1.093	0.915	0.989
735	PIDD1_KAN626-2_5.tif:0004-0490	1.108	26.977	0	117	6.422	55.604	0.94	29.887	2320	1.16	0.862	0.983
736	PIDD1_KAN626-2_5.tif:0005-0521	1.597	62.903	0	317	50.204	59.216	0.863	100.482	7800	1.139	0.878	0.969
737	PIDD1_KAN626-2_5.tif:0006-0540	1.366	40.075	0	157	66.738	61.347	0.957	54.724	4248	1.099	0.91	0.981
738	PIDD1_KAN626-2_5.tif:0007-0788	1.481	40.035	0	231	70.095	89.504	0.964	59.31	4604	1.038	0.963	0.979
739	PIDD1_KAN626-2_5.tif:0008-0789	1.031	29.175	0	118	10.731	89.603	0.919	30.067	2334	1.031	0.97	0.994
740	PIDD1_KAN626-2_5.tif:0009-0912	1.404	48.376	0	396	52.423	103.501	0.913	67.928	5273	1.264	0.791	0.952
741	PIDD1_KAN626-2_5.tif:0010-0917	0.928	63.167	0	218	77.861	104.136	0.903	58.588	4548	1.125	0.889	1
742	PIDD1_KAN626-2_5.tif:0011-1004	1.804	56.257	0	375	121.304	113.98	0.835	101.461	7876	1.271	0.787	0.946
										5330.57
743	PIDD1_KAN626-3_1.tif:0001-0008	1.134	9.568	0	41	51.995	0.965	0.93	10.847	842	1.11	0.901	0.989
744	PIDD1_KAN626-3_1.tif:0002-0085	0.915	13.211	0	59	43.351	9.711	0.924	12.084	938	1.13	0.885	0.993
745	PIDD1_KAN626-3_1.tif:0003-0172	1.237	17.458	0	123	72.422	19.513	0.936	21.591	1676	1.101	0.908	0.985
746	PIDD1_KAN626-3_1.tif:0004-0189	0.915	9.479	0	72	103.404	21.515	0.924	8.67	673	1.13	0.885	0.993
747	PIDD1_KAN626-3_1.tif:0005-0214	0.721	20.446	0	57	131.49	24.289	0.92	14.75	1145	1.143	0.875	1
748	PIDD1_KAN626-3_1.tif:0006-0344	0.824	8.656	0	37	1.022	39.044	0.914	7.137	554	1	1	1
749	PIDD1_KAN626-3_1.tif:0007-0350	1.031	11.95	0	42	125.366	39.776	0.919	12.315	956	1.031	0.97	0.994
750	PIDD1_KAN626-3_1.tif:0008-0387	1.095	26.271	0	96	78.83	43.918	0.929	28.766	2233	1.186	0.843	0.977
751	PIDD1_KAN626-3_1.tif:0009-0393	1.224	15.779	0	81	140.859	44.61	0.957	19.31	1499	1.023	0.978	0.974
752	PIDD1_KAN626-3_1.tif:0010-0456	1.005	30.577	0	133	40.447	51.797	0.929	30.724	2385	1.086	0.921	0.987
753	PIDD1_KAN626-3_1.tif:0011-0513	1.456	29.504	0	207	64.9	58.238	0.947	42.949	3334	1.239	0.807	0.974
754	PIDD1_KAN626-3_1.tif:0012-0554	1.34	26.885	0	211	87.452	62.871	0.939	36.019	2796	1.2	0.833	0.972
755	PIDD1_KAN626-3_1.tif:0013-0608	1.018	32.785	0	272	114.794	69.065	0.941	33.365	2590	1.001	0.999	0.988
756	PIDD1_KAN626-3_1.tif:0014-0748	1.507	38.624	0	193	26.538	84.937	0.94	58.215	4519	1.107	0.903	0.944
757	PIDD1_KAN626-3_1.tif:0015-0806	0.721	27.929	0	200	35.526	91.538	0.92	20.148	1564	1.143	0.875	1
758	PIDD1_KAN626-3_1.tif:0016-0810	0.812	21.937	0	90	87.174	91.929	0.937	17.803	1382	1.039	0.963	0.992
759	PIDD1_KAN626-3_1.tif:0017-0851	0.824	19.484	0	124	113.273	96.589	0.914	16.064	1247	1	1	1
760	PIDD1_KAN626-3_1.tif:0018-1082	1.237	7.865	0	40	58.627	122.858	0.936	9.726	755	1.222	0.818	0.985
761	PIDD1_KAN626-3_1.tif:0019-1107	0.451	5.514	0	23	144.769	125.701	0.938	2.486	193	1.4	0.714	1
762	PIDD1_KAN626-3_1.tif:0020-1145	0.631	21.469	0	111	99.142	130.014	0.935	13.552	1052	1	1	1
763	PIDD1_KAN626-3_2.tif:0001-0006	0.812	6.143	0	33	87.162	0.675	0.937	4.985	387	1.039	0.963	0.992
764	PIDD1_KAN626-3_2.tif:0002-0091	1.224	13.705	0	86	115.661	10.333	0.926	16.773	1302	1.072	0.932	0.974
765	PIDD1_KAN626-3_2.tif:0003-0140	0.902	13.086	0	45	5.845	15.879	0.947	11.8	916	1.125	0.889	0.986
766	PIDD1_KAN626-3_2.tif:0004-0222	1.7	33.273	0	161	54.716	25.218	0.909	56.579	4392	1.401	0.714	0.978
767	PIDD1_KAN626-3_2.tif:0005-0344	0.721	12.25	0	82	118.721	39.101	0.92	8.837	686	1.143	0.875	1
768	PIDD1_KAN626-3_2.tif:0006-0501	1.481	14.026	0	68	112.674	56.895	0.908	20.779	1613	1.113	0.899	0.987
769	PIDD1_KAN626-3_2.tif:0007-0562	1.585	14.764	0	87	112.946	63.826	0.932	23.394	1816	1.15	0.87	0.969
770	PIDD1_KAN626-3_2.tif:0008-0573	1.198	13.398	0	81	52.101	65.04	0.937	16.051	1246	1.178	0.849	0.969
771	PIDD1_KAN626-3_2.tif:0009-0640	1.366	10.311	0	50	91.944	72.687	0.927	14.08	1093	1.137	0.879	0.986
772	PIDD1_KAN626-3_2.tif:0010-0840	1.546	9.925	0	57	66.531	95.402	0.909	15.343	1191	1.217	0.822	0.964
773	PIDD1_KAN626-3_2.tif:0011-0866	1.134	21.295	0	79	124.453	98.303	0.93	24.141	1874	1.11	0.901	0.989
774	PIDD1_KAN626-3_2.tif:0012-1040	1.275	71.162	0	289	88.184	118.045	0.905	90.755	7045	1.025	0.975	0.995
775	PIDD1_KAN626-3_2.tif:0013-1089	0.631	10.49	0	48	29.113	123.658	0.935	6.621	514	1	1	1
776	PIDD1_KAN626-3_2.tif:0014-1099	0.812	29.016	0	104	132.007	124.73	0.937	23.549	1828	1.039	0.963	0.992
777	PIDD1_KAN626-3_3.tif:0001-0054	0.721	11.464	0	37	69.576	6.186	0.92	8.27	642	1.143	0.875	1
778	PIDD1_KAN626-3_3.tif:0002-0122	0.824	25.078	0	69	91.822	13.847	0.914	20.676	1605	1	1	1
779	PIDD1_KAN626-3_3.tif:0003-0236	1.25	26.99	0	173	63.225	26.791	0.946	33.726	2618	1.026	0.974	0.985
780	PIDD1_KAN626-3_3.tif:0004-0244	1.237	15.823	0	73	16.818	27.703	0.936	19.568	1519	1.044	0.957	0.985
781	PIDD1_KAN626-3_3.tif:0005-0432	1.005	13.256	0	51	73.548	49.032	0.929	13.32	1034	1.259	0.794	0.987
782	PIDD1_KAN626-3_3.tif:0006-0462	0.721	34.179	0	169	19.465	52.437	0.92	24.657	1914	1.143	0.875	1
783	PIDD1_KAN626-3_3.tif:0007-0538	1.043	18.407	0	73	143.18	61.12	0.899	19.207	1491	1	1	1
784	PIDD1_KAN626-3_3.tif:0008-0568	1.108	21.535	0	72	38.07	64.479	0.94	23.858	1852	1.16	0.862	0.983
785	PIDD1_KAN626-3_3.tif:0009-0650	1.198	31.097	0	122	96.211	73.805	0.907	37.255	2892	1.25	0.8	0.974
786	PIDD1_KAN626-3_3.tif:0010-0732	1.121	16.138	0	62	22.638	83.087	0.919	18.087	1404	1.146	0.872	0.983
787	PIDD1_KAN626-3_3.tif:0011-0791	1.237	33.083	0	159	74.22	89.788	0.936	40.914	3176	1.101	0.908	0.985
788	PIDD1_KAN626-3_3.tif:0012-0841	0.953	22.284	0	69	5.221	95.454	0.881	21.243	1649	1.356	0.738	0.961
789	PIDD1_KAN626-3_3.tif:0013-0858	0.631	35.122	0	95	55.672	97.44	0.935	22.17	1721	1	1	1
790	PIDD1_KAN626-3_3.tif:0014-1029	1.572	31.951	0	142	90.062	116.792	0.951	50.215	3898	1.104	0.906	0.968
791	PIDD1_KAN626-3_3.tif:0015-1109	1.005	21.795	0	98	56.12	125.934	0.963	21.9	1700	1.032	0.969	0.981
792	PIDD1_KAN626-3_3.tif:0016-1242	0.812	21.667	0	88	115.146	141.024	0.9	17.584	1365	1.286	0.778	1
793	PIDD1_KAN626-3_4.tif:0001-0025	1.043	19.543	0	71	35.696	2.894	0.899	20.393	1583	1	1	1
794	PIDD1_KAN626-3_4.tif:0002-0061	1.108	44.907	0	188	80.766	6.925	0.94	49.751	3862	1.13	0.885	0.977
795	PIDD1_KAN626-3_4.tif:0003-0108	1.224	21.474	0	86	99.771	12.253	0.926	26.28	2040	1.126	0.888	0.979
796	PIDD1_KAN626-3_4.tif:0004-0136	2.113	66.817	0	484	15.295	15.48	0.801	141.164	10958	1.741	0.574	0.934
797	PIDD1_KAN626-3_4.tif:0005-0138	1.005	6.346	0	52	129.907	15.726	0.963	6.377	495	1.032	0.969	0.981
798	PIDD1_KAN626-3_4.tif:0006-0222	1.314	22.608	0	119	69.205	25.277	0.865	29.706	2306	1.369	0.73	0.971
799	PIDD1_KAN626-3_4.tif:0007-0241	1.585	48.268	0	367	111.436	27.424	0.856	76.482	5937	1.37	0.73	0.972
800	PIDD1_KAN626-3_4.tif:0008-0308	1.121	19.874	0	90	5.613	34.952	0.951	22.273	1729	1.114	0.897	0.983
801	PIDD1_KAN626-3_4.tif:0009-0316	1.237	13.99	0	71	34.225	35.929	0.936	17.301	1343	1.222	0.818	0.985
802	PIDD1_KAN626-3_4.tif:0010-0317	1.121	10.08	0	47	134.776	35.974	0.951	11.298	877	1.114	0.897	0.983
803	PIDD1_KAN626-3_4.tif:0011-0399	1.108	21.837	0	97	51.256	45.285	0.94	24.193	1878	1.13	0.885	0.977
804	PIDD1_KAN626-3_4.tif:0012-0435	1.34	23.865	0	99	87.404	49.439	0.969	31.974	2482	1.108	0.903	0.977
805	PIDD1_KAN626-3_4.tif:0013-0556	0.812	11.952	0	35	1.368	63.1	0.937	9.7	753	1.039	0.963	0.992
806	PIDD1_KAN626-3_4.tif:0014-0562	1.237	24.031	0	96	12.267	63.767	0.936	29.719	2307	1.044	0.957	0.985
807	PIDD1_KAN626-3_4.tif:0015-0597	1.237	21.688	0	134	100.159	67.83	0.936	26.821	2082	1.229	0.814	0.985
808	PIDD1_KAN626-3_4.tif:0016-0614	0.824	9.547	0	35	38.817	69.689	0.914	7.871	611	1	1	1
809	PIDD1_KAN626-3_4.tif:0017-0673	1.288	22.3	0	154	138.403	76.392	0.932	28.727	2230	1.26	0.794	0.971
810	PIDD1_KAN626-3_4.tif:0018-0841	1.275	31.515	0	261	39.606	95.448	0.905	40.193	3120	1.025	0.975	0.995
811	PIDD1_KAN626-3_4.tif:0019-1014	1.507	14.197	0	51	113.32	115.137	0.924	21.397	1661	1.006	0.994	0.983
812	PIDD1_KAN626-3_4.tif:0020-1023	0.721	15.482	0	65	15.379	116.111	0.92	11.169	867	1.143	0.875	1
813	PIDD1_KAN626-3_4.tif:0021-1057	0.915	33.817	0	254	56.744	120.033	0.924	30.93	2401	1.13	0.885	0.993
										1975.18
814	PIDD1_KAN626-4_1.tif:0001-0033	1.043	79.333	0	525	66.227	3.802	0.899	82.781	6426	1	1	1
815	PIDD1_KAN626-4_1.tif:0002-0079	1.043	82.272	0	683	33.312	9.023	0.899	85.847	6664	1	1	1
816	PIDD1_KAN626-4_1.tif:0003-0170	1.211	12.106	0	43	92.955	19.284	0.947	14.66	1138	1.098	0.911	0.974
817	PIDD1_KAN626-4_1.tif:0004-0204	1.043	86.025	0	228	55.218	23.211	0.899	89.764	6968	1	1	1
818	PIDD1_KAN626-4_1.tif:0005-0207	1.043	66.716	0	300	63.163	23.551	0.899	69.616	5404	1	1	1
819	PIDD1_KAN626-4_1.tif:0006-0226	1.043	66.556	0	513	117.189	25.708	0.899	69.448	5391	1	1	1
820	PIDD1_KAN626-4_1.tif:0007-0272	0.721	21.857	0	83	123.431	30.872	0.92	15.768	1224	1.143	0.875	1
821	PIDD1_KAN626-4_1.tif:0008-0297	1.121	20.644	0	69	54.882	33.715	0.951	23.137	1796	1.114	0.897	0.983
822	PIDD1_KAN626-4_1.tif:0009-0305	1.043	72.296	0	596	9.477	34.674	0.899	75.438	5856	1	1	1
823	PIDD1_KAN626-4_1.tif:0010-0356	1.043	81.654	0	432	42.846	40.463	0.899	85.203	6614	1	1	1
824	PIDD1_KAN626-4_1.tif:0011-0360	0.915	6.93	0	27	140.734	40.923	0.924	6.338	492	1.13	0.885	0.993
825	PIDD1_KAN626-4_1.tif:0012-0363	1.043	96.272	0	745	124.112	41.257	0.899	100.456	7798	1	1	1
826	PIDD1_KAN626-4_1.tif:0013-0374	1.353	31.638	0	156	70.941	42.511	0.948	42.795	3322	1.096	0.913	0.977
827	PIDD1_KAN626-4_1.tif:0014-0392	0.631	8.857	0	33	46.819	44.549	0.935	5.591	434	1	1	1
828	PIDD1_KAN626-4_1.tif:0015-0575	1.932	47.86	0	377	101.65	65.322	0.908	92.482	7179	1.253	0.798	0.955
829	PIDD1_KAN626-4_1.tif:0016-0592	1.378	85.29	0	667	118.716	67.253	0.908	117.563	9126	1.127	0.887	0.986
830	PIDD1_KAN626-4_1.tif:0017-0600	1.327	13	0	85	81.62	68.151	0.96	17.249	1339	1.106	0.904	0.972
831	PIDD1_KAN626-4_1.tif:0018-0642	1.366	8.783	0	61	120.632	72.933	0.927	11.993	931	1.109	0.902	0.986
832	PIDD1_KAN626-4_1.tif:0019-0651	0.631	30.041	0	120	35.242	73.945	0.935	18.963	1472	1	1	1
833	PIDD1_KAN626-4_1.tif:0020-0783	1.043	71.395	0	529	112.876	88.927	0.899	74.498	5783	1	1	1
834	PIDD1_KAN626-4_1.tif:0021-0846	1.159	118.856	0	1046	48.294	96.021	0.89	137.801	10697	1.111	0.9	1
835	PIDD1_KAN626-4_1.tif:0022-0914	0.721	18.339	0	89	41.825	103.739	0.92	13.23	1027	1.143	0.875	1
836	PIDD1_KAN626-4_1.tif:0023-0981	1.043	95.951	0	761	14.358	111.4	0.899	100.121	7772	1	1	1
837	PIDD1_KAN626-4_1.tif:0024-1078	1.043	60.025	0	481	71.335	122.41	0.899	62.634	4862	1	1	1
838	PIDD1_KAN626-4_2.tif:0001-0037	1.25	24.082	0	83	13.852	4.195	0.916	30.093	2336	1.076	0.93	0.985
839	PIDD1_KAN626-4_2.tif:0002-0051	1.597	17.218	0	97	47.5	5.789	0.967	27.504	2135	1.117	0.895	0.976
840	PIDD1_KAN626-4_2.tif:0003-0108	1.147	14.787	0	53	117.024	12.31	0.909	16.953	1316	1.115	0.897	0.994
841	PIDD1_KAN626-4_2.tif:0004-0239	1.043	96.79	0	760	31.383	27.183	0.899	100.997	7840	1	1	1
842	PIDD1_KAN626-4_2.tif:0005-0254	1.791	100.899	0	839	69.021	28.825	0.931	180.674	14025	1.052	0.951	0.986
843	PIDD1_KAN626-4_2.tif:0006-0252	1.043	65.173	0	475	100.958	28.659	0.899	68.005	5279	1	1	1
844	PIDD1_KAN626-4_2.tif:0007-0254	1.043	73	0	437	58.736	28.886	0.899	76.173	5913	1	1	1
845	PIDD1_KAN626-4_2.tif:0008-0270	1.353	33.981	0	182	40.791	30.662	0.891	45.964	3568	1.339	0.747	0.991
846	PIDD1_KAN626-4_2.tif:0009-0296	1.327	10.932	0	57	105.504	33.601	0.96	14.505	1126	1.153	0.867	0.976
847	PIDD1_KAN626-4_2.tif:0010-0347	1.121	16.322	0	149	74.347	39.446	0.919	18.293	1420	1.146	0.872	0.983
848	PIDD1_KAN626-4_2.tif:0011-0390	0.824	9.906	0	61	6.356	44.265	0.914	8.167	634	1	1	1
849	PIDD1_KAN626-4_2.tif:0012-0432	1.043	67.296	0	582	37.285	49.089	0.899	70.221	5451	1	1	1
850	PIDD1_KAN626-4_2.tif:0013-0601	1.043	50.531	0	396	75.307	68.27	0.899	52.727	4093	1	1	1
851	PIDD1_KAN626-4_2.tif:0014-0677	1.043	78.444	0	592	56.807	76.896	0.899	81.854	6354	1	1	1
852	PIDD1_KAN626-4_2.tif:0015-0697	1.121	13.379	0	61	77.128	79.104	0.951	14.995	1164	1.114	0.897	0.983
853	PIDD1_KAN626-4_2.tif:0016-0704	1.134	19.523	0	93	52.937	79.904	0.93	22.132	1718	1.111	0.9	0.989
854	PIDD1_KAN626-4_2.tif:0017-0723	1.121	17.69	0	126	114.299	82.112	0.919	19.826	1539	1.146	0.872	0.983
855	PIDD1_KAN626-4_2.tif:0018-0725	1.043	51.716	0	384	70.994	82.344	0.899	53.964	4189	1	1	1
856	PIDD1_KAN626-4_2.tif:0019-0736	1.288	69.13	0	226	49.486	83.536	0.886	89.055	6913	1	1	1
857	PIDD1_KAN626-4_2.tif:0020-0768	0.721	20.661	0	56	5.505	87.168	0.92	14.905	1157	1.143	0.875	1
858	PIDD1_KAN626-4_2.tif:0021-0853	0.915	27.676	0	119	44.088	96.821	0.924	25.314	1965	1.13	0.885	0.993
859	PIDD1_KAN626-4_2.tif:0022-0907	1.043	64	0	568	105.839	103.001	0.899	66.782	5184	1	1	1
860	PIDD1_KAN626-4_2.tif:0023-0998	1.043	55.272	0	486	62.141	113.33	0.899	57.674	4477	1	1	1
861	PIDD1_KAN626-4_2.tif:0024-1010	1.25	17.969	0	80	120.017	114.692	0.916	22.454	1743	1.221	0.819	0.99
862	PIDD1_KAN626-4_2.tif:0025-1041	1.237	47.219	0	299	68.72	118.204	0.936	58.395	4533	1.222	0.818	0.985
863	PIDD1_KAN626-4_2.tif:0026-1159	0.721	13.411	0	42	97.326	131.547	0.92	9.675	751	1.143	0.875	1
864	PIDD1_KAN626-4_2.tif:0027-1228	1.043	52.765	0	468	86.998	139.435	0.899	55.059	4274	1	1	1
865	PIDD1_KAN626-4_3.tif:0001-0039	0.631	69.204	0	238	85.522	4.483	0.935	43.684	3391	1	1	1
866	PIDD1_KAN626-4_3.tif:0002-0086	1.288	78.72	0	395	44.606	9.761	0.886	101.409	7872	1	1	1
867	PIDD1_KAN626-4_3.tif:0003-0115	1.043	53.704	0	448	106.179	13.109	0.899	56.038	4350	1	1	1
868	PIDD1_KAN626-4_3.tif:0004-0177	1.159	66.1	0	363	15.493	20.09	0.89	76.637	5949	1.111	0.9	1
869	PIDD1_KAN626-4_3.tif:0005-0188	1.262	78.52	0	746	77.294	21.338	0.925	99.129	7695	1.052	0.95	0.99
870	PIDD1_KAN626-4_3.tif:0006-0269	1.121	14.667	0	50	70.716	30.593	0.951	16.438	1276	1.114	0.897	0.983
871	PIDD1_KAN626-4_3.tif:0007-0324	1.159	57.567	0	445	51.359	36.774	0.89	66.743	5181	1.111	0.9	1
872	PIDD1_KAN626-4_3.tif:0008-0346	1.275	83.848	0	746	101.577	39.276	0.905	106.936	8301	1.025	0.975	0.995
873	PIDD1_KAN626-4_3.tif:0009-0360	1.262	61.602	0	478	44.719	40.86	0.925	77.77	6037	1.052	0.95	0.99
874	PIDD1_KAN626-4_3.tif:0010-0410	1.082	18.988	0	57	44.312	46.516	0.888	20.547	1595	1.398	0.715	0.977
875	PIDD1_KAN626-4_3.tif:0011-0518	1.043	67.901	0	578	61.006	58.85	0.899	70.852	5500	1	1	1
876	PIDD1_KAN626-4_3.tif:0012-0548	1.043	55	0	208	89.835	62.255	0.899	57.39	4455	1	1	1
877	PIDD1_KAN626-4_3.tif:0013-0682	1.262	63.786	0	313	30.645	77.407	0.925	80.527	6251	1.052	0.95	0.99
878	PIDD1_KAN626-4_3.tif:0014-0768	1.224	31.105	0	147	108.975	87.183	0.957	38.067	2955	1.018	0.983	0.979
879	PIDD1_KAN626-4_3.tif:0015-0809	1.043	54.951	0	368	108.449	91.878	0.899	57.339	4451	1	1	1
880	PIDD1_KAN626-4_3.tif:0016-0822	1.043	88.852	0	546	20.033	93.354	0.899	92.714	7197	1	1	1
881	PIDD1_KAN626-4_3.tif:0017-0832	1.043	38.519	0	182	47.84	94.489	0.899	40.193	3120	1	1	1
882	PIDD1_KAN626-4_3.tif:0018-0901	1.275	74.343	0	625	142.788	102.258	0.905	94.813	7360	1.025	0.975	0.995
883	PIDD1_KAN626-4_3.tif:0019-0952	1.043	82.111	0	285	61.687	108.109	0.899	85.68	6651	1	1	1
884	PIDD1_KAN626-4_3.tif:0020-1093	1.391	58	0	282	84.444	124.112	0.916	80.694	6264	1.112	0.9	0.991
885	PIDD1_KAN626-4_3.tif:0021-1096	1.031	37.938	0	225	81.204	124.458	0.919	39.098	3035	1.031	0.97	0.994
886	PIDD1_KAN626-4_3.tif:0022-1156	0.928	59.986	0	221	133.419	131.206	0.903	55.638	4319	1.125	0.889	1
887	PIDD1_KAN626-4_3.tif:0023-1228	0.824	6.875	0	23	54.821	139.378	0.914	5.668	440	1	1	1
888	PIDD1_KAN626-4_4.tif:0001-0037	1.25	15.351	0	104	144.16	4.185	0.916	19.182	1489	1.071	0.934	0.99
889	PIDD1_KAN626-4_4.tif:0002-0047	1.043	58.025	0	465	75.988	5.391	0.899	60.547	4700	1	1	1
890	PIDD1_KAN626-4_4.tif:0003-0056	1.159	104.2	0	947	17.876	6.356	0.89	120.81	9378	1.111	0.9	1
891	PIDD1_KAN626-4_4.tif:0004-0138	1.043	66.852	0	415	59.644	15.72	0.899	69.757	5415	1	1	1
892	PIDD1_KAN626-4_4.tif:0005-0209	1.134	21.307	0	56	56.342	23.722	0.93	24.154	1875	1.111	0.9	0.989
893	PIDD1_KAN626-4_4.tif:0006-0245	0.812	16.651	0	54	107.478	27.801	0.937	13.513	1049	1.039	0.963	0.992
894	PIDD1_KAN626-4_4.tif:0007-0292	1.005	27.795	0	142	17.416	33.193	0.963	27.929	2168	1.032	0.969	0.981
895	PIDD1_KAN626-4_4.tif:0008-0481	1.159	71.533	0	495	89.835	54.594	0.89	82.936	6438	1.111	0.9	1
896	PIDD1_KAN626-4_4.tif:0009-0516	1.262	81.235	0	637	96.021	58.566	0.925	102.556	7961	1.052	0.95	0.99
897	PIDD1_KAN626-4_4.tif:0010-0530	1.159	64.356	0	405	118.778	60.155	0.89	74.614	5792	1.111	0.9	1
898	PIDD1_KAN626-4_4.tif:0011-0552	1.108	24.837	0	127	44.276	62.709	0.94	27.516	2136	1.129	0.886	0.977
899	PIDD1_KAN626-4_4.tif:0012-0617	1.043	49.481	0	385	128.993	70.086	0.899	51.632	4008	1	1	1
900	PIDD1_KAN626-4_4.tif:0013-0654	1.275	91.545	0	289	53.226	74.234	0.905	116.752	9063	1.025	0.975	0.995
901	PIDD1_KAN626-4_4.tif:0014-0676	0.824	25.125	0	136	4.654	76.726	0.914	20.715	1608	1	1	1
902	PIDD1_KAN626-4_4.tif:0015-0706	1.404	86.578	0	539	102.439	80.136	0.897	121.57	9437	1.103	0.907	0.995
903	PIDD1_KAN626-4_4.tif:0016-0731	1.005	15.218	0	64	119.805	83.019	0.963	15.291	1187	1.032	0.969	0.981
904	PIDD1_KAN626-4_4.tif:0017-0748	0.721	15.625	0	102	133.419	84.898	0.92	11.272	875	1.143	0.875	1
905	PIDD1_KAN626-4_4.tif:0018-0758	1.572	17.254	0	129	21.331	86.074	0.951	27.117	2105	1.178	0.849	0.976
906	PIDD1_KAN626-4_4.tif:0019-0798	1.159	64.233	0	386	18.841	90.63	0.89	74.472	5781	1.111	0.9	1
907	PIDD1_KAN626-4_4.tif:0020-0813	1.147	19.101	0	97	108.234	92.325	0.897	21.9	1700	1.384	0.723	0.957
908	PIDD1_KAN626-4_4.tif:0021-0825	1.43	32.441	0	128	35.172	93.631	0.93	46.389	3601	1.215	0.823	0.965
909	PIDD1_KAN626-4_4.tif:0022-0913	1.043	91.778	0	773	92.105	103.682	0.899	95.767	7434	1	1	1
910	PIDD1_KAN626-4_4.tif:0023-0971	1.224	19.6	0	72	85.348	110.203	0.957	23.987	1862	1.023	0.978	0.974
911	PIDD1_KAN626-4_4.tif:0024-0987	1.288	65.83	0	313	6.473	112.067	0.875	84.804	6583	1.242	0.805	0.952
912	PIDD1_KAN626-4_5.tif:0001-0008	1.159	84.811	0	659	109.244	0.908	0.89	98.33	7633	1.111	0.9	1
913	PIDD1_KAN626-4_5.tif:0002-0039	0.812	15.444	0	77	97.717	4.433	0.937	12.534	973	1.039	0.963	0.992
914	PIDD1_KAN626-4_5.tif:0003-0083	1.043	50.753	0	276	79.166	9.477	0.899	52.959	4111	1	1	1
915	PIDD1_KAN626-4_5.tif:0004-0090	1.043	57.852	0	451	11.407	10.272	0.899	60.366	4686	1	1	1
916	PIDD1_KAN626-4_5.tif:0005-0165	1.043	72.284	0	531	28.659	18.784	0.899	75.426	5855	1	1	1
917	PIDD1_KAN626-4_5.tif:0006-0252	1.043	81.877	0	434	60.439	28.659	0.899	85.435	6632	1	1	1
918	PIDD1_KAN626-4_5.tif:0007-0266	1.043	80.086	0	713	104.704	30.248	0.899	83.567	6487	1	1	1
919	PIDD1_KAN626-4_5.tif:0008-0298	1.237	17.167	0	87	48.579	33.834	0.967	21.23	1648	1.049	0.953	0.98
920	PIDD1_KAN626-4_5.tif:0009-0399	1.52	82.831	0	572	132.298	45.33	0.905	125.911	9774	1.06	0.944	0.992
921	PIDD1_KAN626-4_5.tif:0010-0421	0.915	17.521	0	63	111.066	47.778	0.924	16.026	1244	1.13	0.885	0.993
922	PIDD1_KAN626-4_5.tif:0011-0427	1.043	84.901	0	708	54.537	48.521	0.899	88.591	6877	1	1	1
923	PIDD1_KAN626-4_5.tif:0012-0445	1.043	64.79	0	365	17.649	50.564	0.899	67.606	5248	1	1	1
924	PIDD1_KAN626-4_5.tif:0013-0449	1.353	38.857	0	231	90.236	51.013	0.919	52.56	4080	1.158	0.863	0.981
925	PIDD1_KAN626-4_5.tif:0014-0468	1.043	72.79	0	605	71.789	53.175	0.899	75.954	5896	1	1	1
926	PIDD1_KAN626-4_5.tif:0015-0498	1.043	68.123	0	492	47.727	56.58	0.899	71.084	5518	1	1	1
927	PIDD1_KAN626-4_5.tif:0016-0560	1.043	83.815	0	719	45.911	63.617	0.899	87.458	6789	1	1	1
928	PIDD1_KAN626-4_5.tif:0017-0639	1.043	88.802	0	602	79.62	72.583	0.899	92.662	7193	1	1	1
929	PIDD1_KAN626-4_5.tif:0018-0669	1.043	73.938	0	558	83.139	75.988	0.899	77.152	5989	1	1	1
930	PIDD1_KAN626-4_5.tif:0019-0677	0.464	27.472	0	266	144.826	76.896	0.808	12.741	989	2.25	0.444	1
931	PIDD1_KAN626-4_5.tif:0020-0772	1.288	67.87	0	300	58.68	87.622	0.886	87.432	6787	1	1	1
932	PIDD1_KAN626-4_5.tif:0021-0784	1.043	71.383	0	504	80.528	89.041	0.899	74.485	5782	1	1	1
933	PIDD1_KAN626-4_5.tif:0022-0852	1.262	79.265	0	695	118.494	96.702	0.925	100.069	7768	1.052	0.95	0.99
934	PIDD1_KAN626-4_5.tif:0023-0859	1.043	98.667	0	736	25.367	97.553	0.899	102.955	7992	1	1	1
935	PIDD1_KAN626-4_5.tif:0024-0865	1.391	86.935	0	268	82.174	98.234	0.863	120.951	9389	1.333	0.75	1
936	PIDD1_KAN626-4_5.tif:0025-0874	1.043	54.185	0	453	69.746	99.256	0.899	56.54	4389	1	1	1
937	PIDD1_KAN626-4_5.tif:0026-0908	1.043	81.691	0	433	63.276	103.115	0.899	85.242	6617	1	1	1
938	PIDD1_KAN626-4_5.tif:0027-0916	0.721	12.268	0	44	67.646	104.023	0.92	8.85	687	1.143	0.875	1
939	PIDD1_KAN626-4_5.tif:0028-0977	1.121	14.805	0	97	101.351	110.951	0.951	16.592	1288	1.146	0.872	0.983
940	PIDD1_KAN626-4_5.tif:0029-1052	0.824	13.344	0	45	44.492	119.402	0.914	11.001	854	1	1	1
941	PIDD1_KAN626-4_5.tif:0030-1076	1.378	72.075	0	421	78.822	122.131	0.936	99.348	7712	1.127	0.887	0.986
942	PIDD1_KAN626-4_5.tif:0031-1095	1.043	92.938	0	524	91.538	124.339	0.899	96.978	7528	1	1	1
943	PIDD1_KAN626-4_5.tif:0032-1103	1.159	84.933	0	685	14.188	125.247	0.89	98.472	7644	1.111	0.9	1
944	PIDD1_KAN626-4_5.tif:0033-1168	1.262	75.51	0	535	111.344	132.568	0.925	95.329	7400	1.052	0.95	0.99
945	PIDD1_KAN626-4_5.tif:0034-1201	0.812	101.968	0	465	0.624	136.37	0.9	82.756	6424	1.286	0.778	1
946	PIDD1_KAN626-4_5.tif:0035-1201	0.812	7.032	0	32	112.939	136.307	0.937	5.707	443	1.039	0.963	0.992
947	PIDD1_KAN626-4_5.tif:0036-1247	1.043	77.679	0	695	132.625	141.591	0.899	81.055	6292	1	1	1
										4632.24
948	PIDD1_KAN626-5_1.tif:0001-0103	2.164	152.31	0	1389	11.534	11.684	0.933	329.631	25588	1.181	0.847	0.971
949	PIDD1_KAN626-5_1.tif:0002-0203	2.692	63.498	0	695	82.061	23.038	0.809	170.96	13271	1.525	0.656	0.921
950	PIDD1_KAN626-5_1.tif:0003-0222	0.799	6.161	0	47	120.764	25.197	0.96	4.921	382	1.081	0.925	0.984
951	PIDD1_KAN626-5_1.tif:0004-0445	2.357	62.093	0	472	55.273	50.569	0.865	146.381	11363	1.391	0.719	0.941
952	PIDD1_KAN626-5_1.tif:0005-0450	1.288	69.46	0	299	17.82	51.075	0.886	89.48	6946	1	1	1
953	PIDD1_KAN626-5_1.tif:0006-0452	1.25	26.258	0	121	142.448	51.307	0.946	32.811	2547	1.026	0.974	0.985
954	PIDD1_KAN626-5_1.tif:0007-0463	2.061	64	0	478	97.934	52.621	0.868	131.914	10240	1.22	0.82	0.938
955	PIDD1_KAN626-5_1.tif:0008-0596	1.752	97.206	0	792	118.433	67.698	0.887	170.303	13220	1.22	0.82	0.975
956	PIDD1_KAN626-5_1.tif:0009-0721	1.752	90.463	0	531	10.94	81.9	0.887	158.49	12303	1.23	0.813	0.978
957	PIDD1_KAN626-5_1.tif:0010-0756	2.602	95.797	0	1022	73.39	85.9	0.805	249.284	19351	1.544	0.648	0.937
958	PIDD1_KAN626-5_1.tif:0011-0780	1.881	94.87	0	695	110.854	88.553	0.871	178.432	13851	1.319	0.758	0.977
959	PIDD1_KAN626-5_1.tif:0012-0881	2.963	48.726	0	590	36.829	100.092	0.824	144.371	11207	1.443	0.693	0.909
960	PIDD1_KAN626-5_1.tif:0013-0979	2.808	102.959	0	1054	89.766	111.201	0.827	289.142	22445	1.566	0.638	0.944
961	PIDD1_KAN626-5_1.tif:0014-1030	1.043	66.963	0	583	11.18	116.962	0.899	69.873	5424	1	1	1
962	PIDD1_KAN626-5_1.tif:0015-1062	4.109	93.335	0	549	32.401	120.629	0.698	383.556	29774	1.371	0.729	0.859
963	PIDD1_KAN626-5_1.tif:0016-1064	1.043	71.84	0	490	10.726	120.821	0.899	74.962	5819	1	1	1
964	PIDD1_KAN626-5_1.tif:0017-1066	1.159	83.322	0	261	66.625	121.048	0.89	96.604	7499	1.111	0.9	1
965	PIDD1_KAN626-5_2.tif:0001-0084	1.52	86.585	0	412	121.969	9.604	0.905	131.618	10217	1.06	0.944	0.992
966	PIDD1_KAN626-5_2.tif:0002-0155	1.662	82.341	0	456	87.854	17.645	0.923	136.835	10622	1.093	0.915	0.989
967	PIDD1_KAN626-5_2.tif:0003-0164	1.043	49.025	0	384	22.87	18.671	0.899	51.155	3971	1	1	1
968	PIDD1_KAN626-5_2.tif:0004-0236	1.662	110.465	0	728	121.724	26.791	0.923	183.572	14250	1.093	0.915	0.989
969	PIDD1_KAN626-5_2.tif:0005-0345	1.262	82.969	0	289	98.291	39.158	0.925	104.746	8131	1.052	0.95	0.99
970	PIDD1_KAN626-5_2.tif:0006-0401	2.242	131.575	0	1208	69.902	45.57	0.921	294.926	22894	1.082	0.924	0.98
971	PIDD1_KAN626-5_2.tif:0007-0507	1.636	97.543	0	650	22.639	57.549	0.909	159.585	12388	1.131	0.884	0.984
972	PIDD1_KAN626-5_2.tif:0008-0544	1.765	57.679	0	297	28.716	61.724	0.788	101.796	7902	1.478	0.677	0.898
973	PIDD1_KAN626-5_2.tif:0009-0595	2.19	93.371	0	689	6.088	67.575	0.87	204.48	15873	1.288	0.777	0.944
974	PIDD1_KAN626-5_2.tif:0010-0599	1.043	82.074	0	656	97.213	68.043	0.899	85.641	6648	1	1	1
975	PIDD1_KAN626-5_2.tif:0011-0635	1.018	58.076	0	145	58.86	72.118	0.908	59.104	4588	1.058	0.946	0.988
976	PIDD1_KAN626-5_2.tif:0012-0677	1.984	63.448	0	428	32.911	76.828	0.864	125.872	9771	1.287	0.777	0.963
977	PIDD1_KAN626-5_2.tif:0013-0781	2.074	110.435	0	1033	17.754	88.715	0.873	229.046	17780	1.127	0.887	0.947
978	PIDD1_KAN626-5_2.tif:0014-0790	1.043	66.617	0	449	35.242	89.722	0.899	69.513	5396	1	1	1
979	PIDD1_KAN626-5_2.tif:0015-0795	1.816	103.972	0	707	96.124	90.246	0.895	188.854	14660	1.048	0.954	0.989
980	PIDD1_KAN626-5_2.tif:0016-0813	1.791	95.942	0	555	63.452	92.27	0.906	171.798	13336	1.051	0.951	0.982
981	PIDD1_KAN626-5_2.tif:0017-1081	2.19	72.265	0	587	29.178	122.756	0.922	158.258	12285	1.08	0.926	0.971
982	PIDD1_KAN626-5_3.tif:0001-0013	1.52	96.669	0	684	130.472	1.537	0.905	146.948	11407	1.063	0.941	0.987
983	PIDD1_KAN626-5_3.tif:0002-0095	2.37	60.918	0	506	46.703	10.749	0.734	144.397	11209	1.598	0.626	0.878
984	PIDD1_KAN626-5_3.tif:0003-0170	1.043	89.395	0	194	42.733	19.352	0.899	93.28	7241	1	1	1
985	PIDD1_KAN626-5_3.tif:0004-0205	1.971	95.529	0	738	34.01	23.302	0.903	188.287	14616	1.088	0.919	0.959
986	PIDD1_KAN626-5_3.tif:0005-0218	2.087	72.809	0	521	11.103	24.736	0.9	151.946	11795	1.269	0.788	0.956
987	PIDD1_KAN626-5_3.tif:0006-0231	3.066	73.87	0	801	53.733	26.327	0.796	226.483	17581	1.662	0.602	0.96
988	PIDD1_KAN626-5_3.tif:0007-0340	1.043	73.679	0	243	74.172	38.647	0.899	76.881	5968	1	1	1
989	PIDD1_KAN626-5_3.tif:0008-0351	1.726	94.343	0	227	67.919	39.906	0.898	162.857	12642	1.253	0.798	0.971
990	PIDD1_KAN626-5_3.tif:0009-0376	2.151	82.898	0	689	48.211	42.693	0.79	178.342	13844	1.702	0.588	0.92
991	PIDD1_KAN626-5_3.tif:0010-0554	2.435	89.307	0	260	71.893	62.899	0.936	217.44	16879	1.075	0.931	0.964
992	PIDD1_KAN626-5_3.tif:0011-0617	2.886	86.21	0	1145	24.603	70.149	0.672	248.769	19311	2.034	0.492	0.878
993	PIDD1_KAN626-5_3.tif:0012-0651	2.293	43.876	0	226	95.908	73.889	0.701	100.61	7810	2.264	0.442	0.942
994	PIDD1_KAN626-5_3.tif:0013-0654	1.675	66.931	0	495	126.708	74.186	0.796	112.088	8701	1.494	0.669	0.919
995	PIDD1_KAN626-5_3.tif:0014-0681	1.159	72.156	0	182	86.147	77.35	0.89	83.657	6494	1.111	0.9	1
996	PIDD1_KAN626-5_3.tif:0015-0792	2.332	54.414	0	520	94.95	89.872	0.707	126.877	9849	1.642	0.609	0.86
997	PIDD1_KAN626-5_3.tif:0016-0936	1.662	104.806	0	676	59.203	106.25	0.898	174.168	13520	1.107	0.903	0.992
998	PIDD1_KAN626-5_3.tif:0017-0995	1.043	86.358	0	307	45.116	112.989	0.899	90.111	6995	1	1	1
999	PIDD1_KAN626-5_3.tif:0018-1124	2.564	74.402	0	963	84.96	127.59	0.686	190.735	14806	1.749	0.572	0.838
1000	PIDD1_KAN626-5_4.tif:0001-0015	1.533	99.63	0	694	34.901	1.759	0.912	152.732	11856	1.044	0.958	0.992
1001	PIDD1_KAN626-5_4.tif:0002-0025	2.035	88.247	0	722	115.611	2.905	0.887	179.617	13943	1.38	0.725	0.978
1002	PIDD1_KAN626-5_4.tif:0003-0045	2.409	97.016	0	914	73.939	5.149	0.864	233.71	18142	1.293	0.773	0.949
1003	PIDD1_KAN626-5_4.tif:0004-0139	2.242	84.19	0	843	140.223	15.79	0.903	188.712	14649	1.335	0.749	0.928
1004	PIDD1_KAN626-5_4.tif:0005-0194	1.262	122.408	0	1187	59.361	22.019	0.925	154.535	11996	1.052	0.95	0.99
1005	PIDD1_KAN626-5_4.tif:0006-0272	1.881	73.164	0	309	91.14	30.913	0.917	137.608	10682	1.134	0.882	0.973
1006	PIDD1_KAN626-5_4.tif:0007-0295	2.113	105.89	0	882	119.202	33.531	0.911	223.713	17366	1.172	0.853	0.953
1007	PIDD1_KAN626-5_4.tif:0008-0297	1.752	100.404	0	651	4.767	33.71	0.962	175.907	13655	1.068	0.936	0.978
1008	PIDD1_KAN626-5_4.tif:0009-0385	2.383	100.092	0	814	45.222	43.73	0.937	238.541	18517	1.137	0.879	0.959
1009	PIDD1_KAN626-5_4.tif:0010-0442	2.28	72.186	0	692	141.438	50.166	0.885	164.597	12777	1.415	0.707	0.967
1010	PIDD1_KAN626-5_4.tif:0011-0691	2.267	101.784	0	856	112.503	78.419	0.922	230.773	17914	1.214	0.824	0.962
1011	PIDD1_KAN626-5_4.tif:0012-0698	1.688	107.832	0	657	18.448	79.228	0.887	181.975	14126	1.093	0.915	0.996
1012	PIDD1_KAN626-5_4.tif:0013-0806	1.752	108.184	0	901	130.071	91.481	0.936	189.537	14713	1.14	0.877	0.978
1013	PIDD1_KAN626-5_4.tif:0014-0892	1.288	78.15	0	291	58.68	101.242	0.886	100.675	7815	1	1	1
1014	PIDD1_KAN626-5_4.tif:0015-0994	1.7	65.583	0	277	32.059	112.836	0.909	111.522	8657	1.185	0.844	0.967
1015	PIDD1_KAN626-5_4.tif:0016-0994	1.507	70.829	0	343	11.747	112.876	0.951	106.755	8287	1	1	0.983
1016	PIDD1_KAN626-5_4.tif:0017-1005	1.984	82.903	0	600	139.034	114.068	0.886	164.468	12767	1.253	0.798	0.96
1017	PIDD1_KAN626-5_4.tif:0018-1129	2.035	63.715	0	517	75.661	128.099	0.79	129.686	10067	1.612	0.62	0.921
1018	PIDD1_KAN626-5_4.tif:0019-1138	2.023	66.573	0	532	115.726	129.192	0.86	134.645	10452	1.386	0.721	0.978
1019	PIDD1_KAN626-5_4.tif:0020-1274	0.631	85.041	10	223	5.051	144.656	0.935	53.68	4167	1	1	1
										12016.1
1020	PIDD1_KAN626-6_1.tif:0001-0015	1.043	68.753	0	657	14.244	1.759	0.899	71.741	5569	1	1	1
1021	PIDD1_KAN626-6_1.tif:0002-0036	2.035	60.354	0	476	87.708	4.107	0.836	122.845	9536	1.433	0.698	0.946
1022	PIDD1_KAN626-6_1.tif:0003-0187	1.043	63.815	0	351	47.273	21.281	0.899	66.588	5169	1	1	1
1023	PIDD1_KAN626-6_1.tif:0004-0229	1.275	98.354	0	871	69.797	25.997	0.905	125.434	9737	1.025	0.975	0.995
1024	PIDD1_KAN626-6_1.tif:0005-0248	1.52	234.237	0	2856	16.282	28.209	0.905	356.065	27640	1.063	0.941	0.987
1025	PIDD1_KAN626-6_1.tif:0006-0250	1.533	106.496	0	947	44.435	28.432	0.912	163.257	12673	1.044	0.958	0.992
1026	PIDD1_KAN626-6_1.tif:0007-0310	1.043	73.235	0	607	55.558	35.242	0.899	76.418	5932	1	1	1
1027	PIDD1_KAN626-6_1.tif:0008-0330	1.726	49.851	0	199	83.439	37.521	0.842	86.053	6680	1.38	0.725	0.931
1028	PIDD1_KAN626-6_1.tif:0009-0345	1.043	54.679	0	409	123.772	39.214	0.899	57.055	4429	1	1	1
1029	PIDD1_KAN626-6_1.tif:0010-0353	1.043	64.235	0	334	67.022	40.122	0.899	67.026	5203	1	1	1
1030	PIDD1_KAN626-6_1.tif:0011-0356	1.043	58.481	0	406	124.907	40.463	0.899	61.023	4737	1	1	1
1031	PIDD1_KAN626-6_1.tif:0012-0382	2.048	83.698	0	574	76.046	43.32	0.862	171.437	13308	1.362	0.734	0.961
1032	PIDD1_KAN626-6_1.tif:0013-0419	2.267	58.068	0	441	113.673	47.59	0.771	131.657	10220	1.549	0.646	0.898
1033	PIDD1_KAN626-6_1.tif:0014-0443	0.812	5.524	0	36	134.958	50.287	0.937	4.483	348	1.039	0.963	0.992
1034	PIDD1_KAN626-6_1.tif:0015-0501	1.881	85.11	0	449	89.772	56.928	0.894	160.075	12426	1.174	0.851	0.97
1035	PIDD1_KAN626-6_1.tif:0016-0558	1.043	62.259	0	395	137.051	63.39	0.899	64.965	5043	1	1	1
1036	PIDD1_KAN626-6_1.tif:0017-0581	1.275	109.939	0	1008	24.397	65.949	0.905	140.21	10884	1.025	0.975	0.995
1037	PIDD1_KAN626-6_1.tif:0018-0708	1.752	100.522	0	732	108.445	80.419	0.936	176.113	13671	1.191	0.839	0.975
1038	PIDD1_KAN626-6_1.tif:0019-0749	1.378	87.832	0	505	24.682	85.016	0.936	121.067	9398	1.127	0.887	0.986
1039	PIDD1_KAN626-6_1.tif:0020-0779	1.043	79.963	0	589	114.692	88.473	0.899	83.438	6477	1	1	1
1040	PIDD1_KAN626-6_1.tif:0021-0816	1.404	95.596	0	426	57.549	92.668	0.897	134.233	10420	1.103	0.907	0.995
1041	PIDD1_KAN626-6_1.tif:0022-0915	2.538	56.274	0	488	116.612	103.833	0.802	142.813	11086	1.534	0.652	0.918
1042	PIDD1_KAN626-6_1.tif:0023-1061	1.043	73.284	0	497	109.357	120.48	0.899	76.469	5936	1	1	1
1043	PIDD1_KAN626-6_1.tif:0024-1095	1.417	95.382	0	537	47.386	124.283	0.879	135.161	10492	1.1	0.909	1
1044	PIDD1_KAN626-6_1.tif:0025-1101	1.391	72.139	0	377	96.825	125.02	0.916	100.366	7791	1.1	0.909	0.991
1045	PIDD1_KAN626-6_1.tif:0026-1148	1.404	85.862	0	429	47.561	130.35	0.897	120.565	9359	1.103	0.907	0.995
1046	PIDD1_KAN626-6_1.tif:0027-1249	1.275	78.606	0	444	28.432	141.818	0.877	100.25	7782	1.222	0.818	1
1047	PIDD1_KAN626-6_1.tif:0028-1273	1.507	90	0	527	3.636	144.499	0.897	135.65	10530	1.205	0.83	0.987
1048	PIDD1_KAN626-6_2.tif:0001-0076	1.043	64.963	0	199	9.477	8.683	0.899	67.786	5262	1	1	1
1049	PIDD1_KAN626-6_2.tif:0002-0161	1.868	111.262	0	885	54.863	18.25	0.887	207.829	16133	1.304	0.767	0.98
1050	PIDD1_KAN626-6_2.tif:0003-0177	2.138	69.446	0	420	40.019	20.084	0.9	148.507	11528	1.208	0.827	0.962
1051	PIDD1_KAN626-6_2.tif:0004-0197	0.824	22.688	0	103	134.157	22.36	0.914	18.705	1452	1	1	1
1052	PIDD1_KAN626-6_2.tif:0005-0369	2.126	59.6	0	484	97.971	41.884	0.77	126.684	9834	1.66	0.603	0.938
1053	PIDD1_KAN626-6_2.tif:0006-0392	0.631	44.306	0	112	83.933	44.549	0.935	27.967	2171	1	1	1
1054	PIDD1_KAN626-6_2.tif:0007-0418	0.812	14.619	0	65	42.001	47.449	0.937	11.865	921	1.039	0.963	0.992
1055	PIDD1_KAN626-6_2.tif:0008-0424	1.456	73.788	0	290	27.302	48.184	0.919	107.412	8338	1.154	0.867	0.97
1056	PIDD1_KAN626-6_2.tif:0009-0439	1.907	88.162	0	553	116.905	49.883	0.954	168.088	13048	1.105	0.905	0.98
1057	PIDD1_KAN626-6_2.tif:0010-0460	2.113	47.787	0	395	132.283	52.235	0.725	100.958	7837	1.955	0.511	0.906
1058	PIDD1_KAN626-6_2.tif:0011-0589	1.404	79.174	0	414	64.813	66.913	0.897	111.174	8630	1.103	0.907	0.995
1059	PIDD1_KAN626-6_2.tif:0012-0602	1.043	58.309	0	498	139.321	68.384	0.899	60.843	4723	1	1	1
1060	PIDD1_KAN626-6_2.tif:0013-0651	1.275	104.394	0	926	98.637	73.894	0.905	133.138	10335	1.025	0.975	0.995
1061	PIDD1_KAN626-6_2.tif:0014-0654	1.52	75.602	0	479	47.784	74.229	0.905	114.923	8921	1.205	0.83	0.992
1062	PIDD1_KAN626-6_2.tif:0015-0686	1.636	80.606	0	455	8.849	77.905	0.935	131.876	10237	1.108	0.903	0.984
1063	PIDD1_KAN626-6_2.tif:0016-0701	2.267	73.591	0	554	102.366	79.529	0.813	166.851	12952	1.593	0.628	0.936
1064	PIDD1_KAN626-6_2.tif:0017-0716	1.043	62.79	0	547	135.803	81.323	0.899	65.519	5086	1	1	1
1065	PIDD1_KAN626-6_2.tif:0018-0737	1.159	70.611	0	428	136.03	83.65	0.89	81.867	6355	1.111	0.9	1
1066	PIDD1_KAN626-6_2.tif:0019-0916	2.126	70.333	0	339	88.52	103.968	0.873	149.499	11605	1.286	0.778	0.965
1067	PIDD1_KAN626-6_2.tif:0020-1052	1.043	77.284	0	611	131.263	119.459	0.899	80.643	6260	1	1	1
1068	PIDD1_KAN626-6_2.tif:0021-1100	0.812	78.524	0	327	130.292	124.844	0.937	63.729	4947	1.039	0.963	0.992
1069	PIDD1_KAN626-6_2.tif:0022-1116	2.087	56.006	0	420	44.818	126.662	0.716	116.881	9073	1.791	0.558	0.885
1070	PIDD1_KAN626-6_2.tif:0023-1145	1.366	67.679	0	334	10.231	129.994	0.899	92.417	7174	1.123	0.89	0.986
1071	PIDD1_KAN626-6_2.tif:0024-1226	1.391	74.056	0	455	76.613	139.208	0.916	103.032	7998	1.112	0.9	0.991
1072	PIDD1_KAN626-6_3.tif:0001-0017	1.417	71.691	0	339	131.376	1.93	0.879	101.589	7886	1.1	0.909	1
1073	PIDD1_KAN626-6_3.tif:0002-0033	2.074	46.87	0	230	76.412	3.762	0.786	97.209	7546	1.619	0.618	0.92
1074	PIDD1_KAN626-6_3.tif:0003-0098	1.894	78.19	0	646	6.559	11.211	0.825	148.069	11494	1.224	0.817	0.93
1075	PIDD1_KAN626-6_3.tif:0004-0182	1.52	105.136	0	616	54.759	20.719	0.931	159.817	12406	1.022	0.979	0.987
1076	PIDD1_KAN626-6_3.tif:0005-0252	2.512	62.328	0	605	123.72	28.587	0.801	156.571	12154	1.64	0.61	0.951
1077	PIDD1_KAN626-6_3.tif:0006-0275	2.035	69.272	0	385	103.93	31.252	0.887	140.996	10945	1.376	0.727	0.981
1078	PIDD1_KAN626-6_3.tif:0007-0278	1.378	73.607	0	470	38.197	31.548	0.908	101.461	7876	1.127	0.887	0.986
1079	PIDD1_KAN626-6_3.tif:0008-0496	2.138	58.06	0	312	68.969	56.266	0.662	124.159	9638	1.811	0.552	0.828
1080	PIDD1_KAN626-6_3.tif:0009-0518	2.306	45.765	0	251	90.308	58.803	0.846	105.531	8192	1.329	0.753	0.927
1081	PIDD1_KAN626-6_3.tif:0010-0632	2.087	68.877	0	457	9.314	71.74	0.829	143.74	11158	1.451	0.689	0.926
1082	PIDD1_KAN626-6_3.tif:0011-0646	0.915	8.986	0	56	133.822	73.371	0.924	8.219	638	1.13	0.885	0.993
1083	PIDD1_KAN626-6_3.tif:0012-0690	1.159	57.367	0	338	111.627	78.315	0.89	66.511	5163	1.111	0.9	1
1084	PIDD1_KAN626-6_3.tif:0013-0703	1.043	73.679	0	455	19.919	79.847	0.899	76.881	5968	1	1	1
1085	PIDD1_KAN626-6_3.tif:0014-0737	1.043	88.716	0	743	17.536	83.706	0.899	92.572	7186	1	1	1
1086	PIDD1_KAN626-6_3.tif:0015-0778	1.649	84.078	0	506	138.771	88.312	0.916	138.639	10762	1.098	0.911	0.988
1087	PIDD1_KAN626-6_3.tif:0016-0892	2.396	70.414	0	584	107.411	101.282	0.742	168.719	13097	1.754	0.57	0.888
1088	PIDD1_KAN626-6_3.tif:0017-0934	1.043	80.877	0	275	4.483	106.066	0.899	84.392	6551	1	1	1
1089	PIDD1_KAN626-6_3.tif:0018-1004	1.391	73.694	0	381	73.094	114.011	0.863	102.53	7959	1.333	0.75	1
1090	PIDD1_KAN626-6_3.tif:0019-1023	1.52	86.814	0	527	37.29	116.162	0.931	131.966	10244	1.022	0.979	0.987
1091	PIDD1_KAN626-6_3.tif:0020-1109	1.971	39.386	0	241	25.457	125.941	0.81	77.628	6026	1.656	0.604	0.939
1092	PIDD1_KAN626-6_3.tif:0021-1161	1.043	77.617	0	383	22.53	131.83	0.899	80.991	6287	1	1	1
1093	PIDD1_KAN626-6_4.tif:0001-0024	1.043	69.815	0	478	70.313	2.781	0.899	72.849	5655	1	1	1
1094	PIDD1_KAN626-6_4.tif:0002-0057	1.52	92.966	0	559	8.399	6.478	0.905	141.318	10970	1.2	0.834	0.992
1095	PIDD1_KAN626-6_4.tif:0003-0064	1.391	82.63	0	467	57.828	7.264	0.863	114.961	8924	1.333	0.75	1
1096	PIDD1_KAN626-6_4.tif:0004-0111	2.087	76.049	0	514	8.802	12.631	0.791	158.709	12320	1.542	0.649	0.923
1097	PIDD1_KAN626-6_4.tif:0005-0182	1.043	74.938	0	572	18.784	20.714	0.899	78.195	6070	1	1	1
1098	PIDD1_KAN626-6_4.tif:0006-0249	1.159	74.033	0	655	107.371	28.318	0.89	85.834	6663	1.111	0.9	1
1099	PIDD1_KAN626-6_4.tif:0007-0262	1.043	56.086	0	417	111.4	29.794	0.899	58.524	4543	1	1	1
1100	PIDD1_KAN626-6_4.tif:0008-0267	1.868	112.545	0	1034	54.369	30.357	0.911	210.225	16319	1.204	0.831	0.976
1101	PIDD1_KAN626-6_4.tif:0009-0309	1.366	76.236	0	529	142.645	35.062	0.837	104.101	8081	1.369	0.731	0.938
1102	PIDD1_KAN626-6_4.tif:0010-0319	0.915	29.775	0	114	128.192	36.212	0.924	27.233	2114	1.13	0.885	0.993
1103	PIDD1_KAN626-6_4.tif:0011-0329	1.765	139.036	0	1615	41.082	37.344	0.918	245.381	19048	1.124	0.89	0.982
1104	PIDD1_KAN626-6_4.tif:0012-0346	0.721	84.429	4	311	78.939	39.271	0.92	60.907	4728	1.143	0.875	1
1105	PIDD1_KAN626-6_4.tif:0013-0357	1.043	78.778	0	217	84.16	40.576	0.899	82.202	6381	1	1	1
1106	PIDD1_KAN626-6_4.tif:0014-0361	1.52	108.737	0	802	40.066	40.974	0.905	165.292	12831	1.205	0.83	0.992
1107	PIDD1_KAN626-6_4.tif:0015-0513	1.043	57.469	0	457	58.736	58.282	0.899	59.967	4655	1	1	1
1108	PIDD1_KAN626-6_4.tif:0016-0518	1.043	80.704	0	606	74.399	58.85	0.899	84.211	6537	1	1	1
1109	PIDD1_KAN626-6_4.tif:0017-0543	1.675	125.931	0	814	18.33	61.64	0.905	210.895	16371	1.09	0.917	0.992
1110	PIDD1_KAN626-6_4.tif:0018-0556	1.507	120.094	0	1232	128.312	63.163	0.897	181.009	14051	1.084	0.923	0.983
1111	PIDD1_KAN626-6_4.tif:0019-0569	2.126	55.958	0	438	132.178	64.619	0.825	118.942	9233	1.452	0.689	0.93
1112	PIDD1_KAN626-6_4.tif:0020-0601	1.043	74.63	0	519	136.257	68.27	0.899	77.873	6045	1	1	1
1113	PIDD1_KAN626-6_4.tif:0021-0679	1.043	66.691	0	425	61.801	77.123	0.899	69.59	5402	1	1	1
1114	PIDD1_KAN626-6_4.tif:0022-0691	1.649	95.086	0	593	59.588	78.485	0.891	156.79	12171	1.114	0.898	0.985
1115	PIDD1_KAN626-6_4.tif:0023-0743	1.507	82.556	0	359	5.566	84.326	0.897	124.43	9659	1.215	0.823	0.987
1116	PIDD1_KAN626-6_4.tif:0024-0755	1.971	101.183	0	843	105.826	85.668	0.791	199.43	15481	1.37	0.73	0.913
1117	PIDD1_KAN626-6_4.tif:0025-0783	1.043	68.136	0	589	25.935	88.927	0.899	71.097	5519	1	1	1
1118	PIDD1_KAN626-6_4.tif:0026-0800	2.267	71.693	0	433	23.047	90.828	0.901	162.548	12618	1.14	0.877	0.954
1119	PIDD1_KAN626-6_4.tif:0027-0818	1.919	102.282	0	837	80.514	92.903	0.879	196.326	15240	1.208	0.828	0.937
1120	PIDD1_KAN626-6_4.tif:0028-0847	1.778	83.551	0	410	65.542	96.187	0.924	148.532	11530	1.185	0.844	0.982
1121	PIDD1_KAN626-6_4.tif:0029-0902	1.043	52.901	0	367	54.31	102.434	0.899	55.2	4285	1	1	1
1122	PIDD1_KAN626-6_4.tif:0030-0924	1.043	90.975	0	798	100.504	104.931	0.899	94.929	7369	1	1	1
1123	PIDD1_KAN626-6_4.tif:0031-0938	1.043	70.025	0	622	100.731	106.52	0.899	73.068	5672	1	1	1
1124	PIDD1_KAN626-6_4.tif:0032-0994	1.237	82.656	0	444	43.358	112.818	0.906	102.221	7935	1.1	0.909	0.98
1125	PIDD1_KAN626-6_4.tif:0033-1024	1.043	68.84	0	561	68.951	116.281	0.899	71.831	5576	1	1	1
1126	PIDD1_KAN626-6_4.tif:0034-1056	2.357	75.202	0	456	107.234	119.852	0.838	177.286	13762	1.448	0.691	0.922
1127	PIDD1_KAN626-6_4.tif:0035-1094	1.404	69.789	0	403	3.069	124.221	0.897	97.995	7607	1.103	0.907	0.995
1128	PIDD1_KAN626-6_4.tif:0036-1147	1.713	74.128	0	273	77.803	130.24	0.891	127.006	9859	1.276	0.784	0.971
1129	PIDD1_KAN626-6_4.tif:0037-1199	1.481	77.078	0	517	60.458	136.15	0.908	114.188	8864	1.012	0.988	0.975
										8750.55
1130	PIDD1_KAN626-7_1.tif:0001-0182	1.984	61.435	0	602	9.936	20.7	0.788	121.879	9461	1.543	0.648	0.888
1131	PIDD1_KAN626-7_1.tif:0002-0187	2.68	101.346	0	943	34.523	21.218	0.873	271.558	21080	1.176	0.851	0.965
1132	PIDD1_KAN626-7_1.tif:0003-0216	1.765	93.212	0	929	133.755	24.527	0.884	164.506	12770	1.236	0.809	0.938
1133	PIDD1_KAN626-7_1.tif:0004-0342	2.486	88.943	0	1012	80.479	38.877	0.82	221.137	17166	1.388	0.72	0.908
1134	PIDD1_KAN626-7_1.tif:0005-0382	1.507	70.197	0	382	31.147	43.405	0.924	105.802	8213	1.084	0.923	0.987
1135	PIDD1_KAN626-7_1.tif:0006-0474	1.842	92.252	0	932	55.099	53.866	0.757	169.943	13192	1.454	0.688	0.88
1136	PIDD1_KAN626-7_1.tif:0007-0647	2.113	73.774	0	700	95.303	73.48	0.934	155.862	12099	1.114	0.898	0.956
1137	PIDD1_KAN626-7_1.tif:0008-0653	1.417	76.782	0	324	47.273	74.116	0.879	108.804	8446	1.1	0.909	1
1138	PIDD1_KAN626-7_1.tif:0009-0680	1.456	74.204	0	320	2.908	77.255	0.892	108.018	8385	1.159	0.863	0.966
1139	PIDD1_KAN626-7_1.tif:0010-0714	2.293	77.708	0	658	133.394	81.007	0.869	178.187	13832	1.39	0.719	0.965
1140	PIDD1_KAN626-7_1.tif:0011-0857	1.726	80.209	0	294	79.149	97.347	0.898	138.458	10748	1.235	0.81	0.975
1141	PIDD1_KAN626-7_1.tif:0012-0965	1.7	97.356	0	451	97.553	109.528	0.87	165.55	12851	1.091	0.917	1
1142	PIDD1_KAN626-7_1.tif:0013-1003	1.816	58.44	0	430	68.469	113.843	0.96	106.15	8240	1.172	0.854	0.966
1143	PIDD1_KAN626-7_1.tif:0014-1198	1.159	79.422	0	472	121.105	136.03	0.89	92.082	7148	1.111	0.9	1
1144	PIDD1_KAN626-7_2.tif:0001-0025	1.391	77.093	0	456	123.706	2.894	0.916	107.258	8326	1.1	0.909	0.991
1145	PIDD1_KAN626-7_2.tif:0002-0177	1.018	51.544	0	145	76.794	20.136	0.908	52.457	4072	1.058	0.946	0.988
1146	PIDD1_KAN626-7_2.tif:0003-0295	2.242	72.989	0	616	4.765	33.471	0.87	163.605	12700	1.404	0.712	0.959
1147	PIDD1_KAN626-7_2.tif:0004-0308	2.357	60.923	0	567	87.17	34.967	0.885	143.624	11149	1.473	0.679	0.956
1148	PIDD1_KAN626-7_2.tif:0005-0321	2.229	85.064	0	634	45.173	36.427	0.885	189.575	14716	1.302	0.768	0.958
1149	PIDD1_KAN626-7_2.tif:0006-0408	1.159	63.222	0	281	119.97	46.365	0.89	73.3	5690	1.111	0.9	1
1150	PIDD1_KAN626-7_2.tif:0007-0447	1.739	65.978	0	432	96.105	50.802	0.805	114.742	8907	1.453	0.688	0.934
1151	PIDD1_KAN626-7_2.tif:0008-0464	1.971	61.235	0	342	122.484	52.663	0.903	120.694	9369	1.282	0.78	0.962
1152	PIDD1_KAN626-7_2.tif:0009-0493	2.023	64.726	0	481	42.039	55.953	0.872	130.909	10162	1.387	0.721	0.94
1153	PIDD1_KAN626-7_2.tif:0010-0538	2.151	75.886	0	769	64.216	61.136	0.884	163.257	12673	1.494	0.669	0.977
1154	PIDD1_KAN626-7_2.tif:0011-0635	1.159	61.933	0	241	25.197	72.129	0.89	71.806	5574	1.111	0.9	1
1155	PIDD1_KAN626-7_2.tif:0012-0771	1.829	107.662	0	938	90.466	87.532	0.966	196.944	15288	1.091	0.917	0.959
1156	PIDD1_KAN626-7_2.tif:0013-0809	2.448	72.863	0	546	55.126	91.822	0.87	178.342	13844	1.424	0.702	0.943
1157	PIDD1_KAN626-7_2.tif:0014-0838	2.126	95.024	0	799	44.181	95.125	0.825	201.981	15679	1.363	0.734	0.924
1158	PIDD1_KAN626-7_2.tif:0015-0863	1.52	80.924	0	455	117.7	97.951	0.905	123.013	9549	1.205	0.83	0.992
1159	PIDD1_KAN626-7_2.tif:0016-0942	1.585	56.642	0	258	83.457	106.913	0.906	89.751	6967	1.32	0.758	0.972
1160	PIDD1_KAN626-7_2.tif:0017-0947	1.791	75.158	0	327	95.572	107.479	0.906	134.581	10447	1.051	0.951	0.982
1161	PIDD1_KAN626-7_2.tif:0018-0972	0.928	23.569	0	157	29.624	110.379	0.903	21.861	1697	1.125	0.889	1
1162	PIDD1_KAN626-7_2.tif:0019-1080	1.842	55.028	0	243	62.409	122.643	0.795	101.37	7869	1.553	0.644	0.899
1163	PIDD1_KAN626-7_2.tif:0020-1186	1.043	80.025	0	213	98.461	134.668	0.899	83.503	6482	1	1	1
1164	PIDD1_KAN626-7_2.tif:0021-1192	1.778	86.5	0	510	27.695	135.301	0.924	153.775	11937	1.069	0.935	0.982
1165	PIDD1_KAN626-7_2.tif:0022-1199	1.469	60.842	0	254	96.072	136.136	0.927	89.351	6936	1.099	0.91	0.974
1166	PIDD1_KAN626-7_2.tif:0023-1212	0.992	23.935	0	179	131.263	137.608	0.951	23.742	1843	1.06	0.944	0.975
1167	PIDD1_KAN626-7_2.tif:0024-1261	1.043	71.901	0	202	128.198	143.18	0.899	75.026	5824	1	1	1
1168	PIDD1_KAN626-7_3.tif:0001-0087	1.636	68.976	0	307	123.654	9.879	0.909	112.849	8760	1.131	0.884	0.984
1169	PIDD1_KAN626-7_3.tif:0002-0124	1.031	51.15	0	143	82.804	14.125	0.919	52.714	4092	1.031	0.97	0.994
1170	PIDD1_KAN626-7_3.tif:0003-0263	2.035	59.38	0	469	15.219	29.883	0.878	120.861	9382	1.421	0.704	0.963
1171	PIDD1_KAN626-7_3.tif:0004-0279	1.275	65.172	0	258	49.367	31.661	0.905	83.116	6452	1.025	0.975	0.995
1172	PIDD1_KAN626-7_3.tif:0005-0340	1.481	59.504	0	206	108.857	38.612	0.882	88.153	6843	1.23	0.813	0.979
1173	PIDD1_KAN626-7_3.tif:0006-0400	1.494	87.922	0	642	84.269	45.461	0.916	131.386	10199	1.105	0.905	0.983
1174	PIDD1_KAN626-7_3.tif:0007-0574	1.237	23.208	0	105	5.901	65.138	0.936	28.702	2228	1.049	0.953	0.98
1175	PIDD1_KAN626-7_3.tif:0008-0627	1.726	77.993	0	756	38.475	71.146	0.898	134.632	10451	1.055	0.948	0.968
1176	PIDD1_KAN626-7_3.tif:0009-0633	2.151	78.82	0	536	94.792	71.893	0.843	169.569	13163	1.47	0.68	0.974
1177	PIDD1_KAN626-7_3.tif:0010-0697	2.203	89.094	0	641	80.054	79.127	0.835	196.261	15235	1.296	0.772	0.942
1178	PIDD1_KAN626-7_3.tif:0011-0761	1.159	80.567	0	246	57.374	86.374	0.89	93.409	7251	1.111	0.9	1
1179	PIDD1_KAN626-7_3.tif:0012-0796	1.907	97.318	0	633	134.157	90.395	0.93	185.543	14403	1.132	0.883	0.98
1180	PIDD1_KAN626-7_3.tif:0013-0948	1.211	44.255	0	224	100.963	107.641	0.947	53.59	4160	1.234	0.81	0.979
1181	PIDD1_KAN626-7_3.tif:0014-0958	2.19	92.553	0	981	61.257	108.738	0.822	202.689	15734	1.423	0.703	0.909
1182	PIDD1_KAN626-7_3.tif:0015-0988	1.494	67.56	0	259	16.387	112.199	0.943	100.958	7837	1.061	0.942	0.983
1183	PIDD1_KAN626-7_3.tif:0016-1025	1.765	98.555	0	724	12.823	116.342	0.943	173.936	13502	1.124	0.89	0.982
1184	PIDD1_KAN626-7_3.tif:0017-1222	1.868	55.276	0	376	59.348	138.725	0.767	103.251	8015	1.578	0.634	0.892
1185	PIDD1_KAN626-7_3.tif:0018-1225	1.275	70.202	0	284	90.351	139.043	0.905	89.532	6950	1.025	0.975	0.995
1186	PIDD1_KAN626-7_4.tif:0001-0024	2.087	87.574	0	647	37.359	2.707	0.923	182.761	14187	1.248	0.801	0.953
1187	PIDD1_KAN626-7_4.tif:0002-0058	1.018	41.316	0	128	56.126	6.651	0.941	42.048	3264	1.001	0.999	0.988
1188	PIDD1_KAN626-7_4.tif:0003-0088	1.52	85.508	0	473	121.497	10.041	0.905	129.982	10090	1.063	0.941	0.987
1189	PIDD1_KAN626-7_4.tif:0004-0104	1.572	66.041	0	287	104.673	11.875	0.924	103.792	8057	1.175	0.851	0.968
1190	PIDD1_KAN626-7_4.tif:0005-0221	1.52	74.017	0	390	82.052	25.084	0.905	112.514	8734	1.2	0.834	0.992
1191	PIDD1_KAN626-7_4.tif:0006-0339	1.404	82.67	0	444	31.889	38.538	0.897	116.082	9011	1.103	0.907	0.995
1192	PIDD1_KAN626-7_4.tif:0007-0395	1.829	82.634	0	542	87.732	44.896	0.892	151.16	11734	1.245	0.803	0.963
1193	PIDD1_KAN626-7_4.tif:0008-0449	1.778	65.094	0	397	52.217	51.012	0.89	115.721	8983	1.221	0.819	0.939
1194	PIDD1_KAN626-7_4.tif:0009-0525	2.01	83.327	0	735	109.67	59.524	0.846	167.456	12999	1.484	0.674	0.945
1195	PIDD1_KAN626-7_4.tif:0010-0623	2.113	85.494	0	434	90.482	70.728	0.911	180.622	14021	1.317	0.76	0.968
1196	PIDD1_KAN626-7_4.tif:0011-0646	1.649	84.188	0	443	32.413	73.312	0.916	138.819	10776	1.094	0.914	0.985
1197	PIDD1_KAN626-7_4.tif:0012-0759	2.126	103.103	0	762	108.757	86.207	0.917	219.153	17012	1.085	0.921	0.954
1198	PIDD1_KAN626-7_4.tif:0013-0845	1.404	63.661	0	381	115.56	95.909	0.886	89.39	6939	1.3	0.769	0.952
1199	PIDD1_KAN626-7_4.tif:0014-0907	1.623	88.222	0	565	48.862	102.945	0.928	143.199	11116	1.104	0.905	0.977
1200	PIDD1_KAN626-7_4.tif:0015-0931	1.752	101.949	0	750	71.104	105.722	0.911	178.612	13865	1.201	0.833	0.975
1201	PIDD1_KAN626-7_4.tif:0016-1043	2.1	85.767	0	650	83.448	118.375	0.884	180.094	13980	1.281	0.781	0.953
1202	PIDD1_KAN626-7_4.tif:0017-1116	1.533	77.16	0	315	104.24	126.723	0.912	118.285	9182	1	1	0.992
1203	PIDD1_KAN626-7_4.tif:0018-1209	1.804	51.279	0	344	129.661	137.183	0.879	92.482	7179	1.31	0.763	0.952
1204	PIDD1_KAN626-7_4.tif:0019-1227	1.533	84.218	0	559	90.341	139.269	0.887	129.106	10022	1.201	0.833	0.996
1205	PIDD1_KAN626-7_4.tif:0020-1270	1.636	91.134	0	637	48.129	144.206	0.935	149.099	11574	1.114	0.898	0.981
										9983.07
1206	PIDD1_KAN626-8_1.tif:0001-0095	1.25	12.825	0	45	143.923	10.788	0.946	16.026	1244	1.026	0.974	0.985
1207	PIDD1_KAN626-8_1.tif:0002-0172	1.224	14.274	0	76	133.831	19.507	0.957	17.468	1356	1.018	0.983	0.979
1208	PIDD1_KAN626-8_1.tif:0003-0221	1.005	12.269	0	40	134.23	25.124	0.929	12.328	957	1.086	0.921	0.987
1209	PIDD1_KAN626-8_1.tif:0004-0223	0.631	21.041	0	64	34.22	25.367	0.935	13.282	1031	1	1	1
1210	PIDD1_KAN626-8_1.tif:0005-0314	0.902	14.1	0	46	128.652	35.639	0.947	12.715	987	1.146	0.873	0.986
1211	PIDD1_KAN626-8_1.tif:0006-0397	1.237	20.5	0	88	107.712	45.06	0.967	25.352	1968	1	1	0.98
1212	PIDD1_KAN626-8_1.tif:0007-0591	0.915	18.873	0	66	32.467	67.129	0.924	17.262	1340	1.13	0.885	0.993
1213	PIDD1_KAN626-8_1.tif:0008-0651	0.631	16.163	0	49	17.422	73.945	0.935	10.203	792	1	1	1
1214	PIDD1_KAN626-8_1.tif:0009-0881	1.198	12.688	0	73	31.218	99.999	0.969	15.201	1180	1.125	0.889	0.974
1215	PIDD1_KAN626-8_1.tif:0010-0928	1.031	16.212	0	79	74.178	105.379	0.919	16.708	1297	1.031	0.97	0.994
1216	PIDD1_KAN626-8_1.tif:0011-1115	0.631	31.02	0	149	61.347	126.609	0.935	19.581	1520	1	1	1
1217	PIDD1_KAN626-8_1.tif:0012-1118	0.928	15.361	0	56	82.004	126.893	0.903	14.248	1106	1.125	0.889	1
1218	PIDD1_KAN626-8_1.tif:0013-1215	0.812	10.143	0	38	24.636	137.896	0.937	8.232	639	1.039	0.963	0.992
1219	PIDD1_KAN626-8_2.tif:0001-0070	1.147	13.326	0	63	99.205	7.997	0.909	15.278	1186	1.115	0.897	0.994
1220	PIDD1_KAN626-8_2.tif:0002-0105	0.915	15.127	0	64	140.973	11.968	0.924	13.836	1074	1.13	0.885	0.993
1221	PIDD1_KAN626-8_2.tif:0003-0123	1.031	7.362	0	35	128.317	14.012	0.919	7.588	589	1.031	0.97	0.994
1222	PIDD1_KAN626-8_2.tif:0004-0273	1.353	23.229	0	95	100.348	31.038	0.948	31.42	2439	1.122	0.892	0.981
1223	PIDD1_KAN626-8_2.tif:0005-0303	1.018	14.025	0	48	34.459	34.437	0.908	14.274	1108	1.058	0.946	0.988
1224	PIDD1_KAN626-8_2.tif:0006-0337	1.043	94.247	0	202	55.899	38.306	0.899	98.343	7634	1	1	1
1225	PIDD1_KAN626-8_2.tif:0007-0351	1.108	31.488	0	155	62.641	39.885	0.94	34.885	2708	1.116	0.896	0.977
1226	PIDD1_KAN626-8_2.tif:0008-0399	1.095	32.059	0	109	88.034	45.291	0.962	35.104	2725	1.139	0.878	0.977
1227	PIDD1_KAN626-8_2.tif:0009-0501	1.366	22	0	94	134.942	56.938	0.899	30.041	2332	1.118	0.894	0.981
1228	PIDD1_KAN626-8_2.tif:0010-0538	0.721	21.786	0	55	51.699	61.063	0.92	15.716	1220	1.143	0.875	1
1229	PIDD1_KAN626-8_2.tif:0011-0627	0.928	16.819	0	64	125.247	71.165	0.903	15.6	1211	1.125	0.889	1
1230	PIDD1_KAN626-8_2.tif:0012-0634	2.087	96.389	0	356	112.599	71.942	0.909	201.156	15615	1.167	0.857	0.985
1231	PIDD1_KAN626-8_2.tif:0013-0857	1.456	22.195	0	118	41.152	97.326	0.947	32.309	2508	1.123	0.891	0.974
1232	PIDD1_KAN626-8_2.tif:0014-0886	1.34	17.221	0	59	49.997	100.553	0.939	23.072	1791	1.2	0.833	0.972
1233	PIDD1_KAN626-8_2.tif:0015-0899	0.812	13.111	0	67	112.712	102.03	0.937	10.641	826	1.039	0.963	0.992
1234	PIDD1_KAN626-8_2.tif:0016-0948	0.812	33.413	0	77	25.645	107.604	0.937	27.117	2105	1.039	0.963	0.992
1235	PIDD1_KAN626-8_2.tif:0017-1020	1.159	12.878	0	52	119.743	115.827	0.89	14.931	1159	1.111	0.9	1
1236	PIDD1_KAN626-8_2.tif:0018-1172	0.721	11.357	0	43	18.614	133.079	0.92	8.193	636	1.143	0.875	1
1237	PIDD1_KAN626-8_2.tif:0019-1211	1.018	21.949	0	82	112.525	137.517	0.941	22.338	1734	1.058	0.946	0.988
1238	PIDD1_KAN626-8_3.tif:0001-0301	0.915	19.817	0	53	114.743	34.227	0.924	18.125	1407	1.13	0.885	0.993
1239	PIDD1_KAN626-8_3.tif:0002-0304	1.005	10.205	0	54	37.972	34.567	0.963	10.254	796	1.032	0.969	0.981
1240	PIDD1_KAN626-8_3.tif:0003-0332	1.031	19.288	0	53	59.99	37.733	0.919	19.877	1543	1.031	0.97	0.994
1241	PIDD1_KAN626-8_3.tif:0004-0375	1.031	19.675	0	66	127.069	42.614	0.919	20.277	1574	1.031	0.97	0.994
1242	PIDD1_KAN626-8_3.tif:0005-0393	1.649	22.656	0	82	85.118	44.621	0.958	37.359	2900	1.094	0.914	0.959
1243	PIDD1_KAN626-8_3.tif:0006-0439	0.721	47.232	0	173	6.413	49.827	0.92	34.074	2645	1.143	0.875	1
1244	PIDD1_KAN626-8_3.tif:0007-0448	0.812	26.778	0	74	140.507	50.854	0.937	21.732	1687	1.039	0.963	0.992
1245	PIDD1_KAN626-8_3.tif:0008-0497	1.018	21.354	0	78	32.848	56.478	0.941	21.732	1687	1.058	0.946	0.988
1246	PIDD1_KAN626-8_3.tif:0009-0513	1.005	8.628	0	26	125.014	58.287	0.929	8.67	673	1.093	0.915	0.981
1247	PIDD1_KAN626-8_3.tif:0010-0572	1.327	30.748	0	192	65.834	64.984	0.96	40.798	3167	1.123	0.89	0.972
1248	PIDD1_KAN626-8_3.tif:0011-0858	1.43	20.838	0	94	64.134	97.404	0.959	29.797	2313	1.221	0.819	0.969
1249	PIDD1_KAN626-8_3.tif:0012-0871	0.902	27.257	0	71	33.766	98.87	0.947	24.579	1908	1.125	0.889	0.986
1250	PIDD1_KAN626-8_3.tif:0013-0875	0.928	15.306	0	55	121.105	99.369	0.903	14.196	1102	1.125	0.889	1
1251	PIDD1_KAN626-8_3.tif:0014-0960	0.915	23.056	0	109	89.784	109.01	0.924	21.088	1637	1.13	0.885	0.993
1252	PIDD1_KAN626-8_3.tif:0015-0990	0.631	19.286	0	47	20.6	112.422	0.935	12.174	945	1	1	1
1253	PIDD1_KAN626-8_3.tif:0016-1009	1.043	24.691	0	123	51.472	114.578	0.899	25.765	2000	1	1	1
1254	PIDD1_KAN626-8_4.tif:0001-0027	0.915	16.451	0	70	143.174	3.07	0.924	15.046	1168	1.13	0.885	0.993
1255	PIDD1_KAN626-8_4.tif:0002-0079	1.031	25.387	0	84	100.221	8.967	0.887	26.164	2031	1.25	0.8	1
1256	PIDD1_KAN626-8_4.tif:0003-0194	0.631	33.551	0	90	91.765	22.076	0.935	21.178	1644	1	1	1
1257	PIDD1_KAN626-8_4.tif:0004-0279	1.237	24.688	0	114	48.29	31.74	0.906	30.531	2370	1.226	0.815	0.985
1258	PIDD1_KAN626-8_4.tif:0005-0280	1.005	10.59	0	47	121.281	31.843	0.963	10.641	826	1.032	0.969	0.981
1259	PIDD1_KAN626-8_4.tif:0006-0335	0.915	21.901	0	86	27.007	38.086	0.924	20.032	1555	1.13	0.885	0.993
1260	PIDD1_KAN626-8_4.tif:0007-0438	0.824	33.125	0	93	98.518	49.713	0.914	27.31	2120	1	1	1
1261	PIDD1_KAN626-8_4.tif:0008-0463	1.25	24.144	0	127	124.287	52.535	0.916	30.17	2342	1.022	0.978	0.985
1262	PIDD1_KAN626-8_4.tif:0009-0718	0.631	20.633	0	54	127.063	81.55	0.935	13.024	1011	1	1	1
1263	PIDD1_KAN626-8_4.tif:0010-0753	0.824	15.188	0	57	93.524	85.466	0.914	12.522	972	1	1	1
1264	PIDD1_KAN626-8_4.tif:0011-0779	0.721	32.982	0	86	73.208	88.473	0.92	23.794	1847	1.143	0.875	1
1265	PIDD1_KAN626-8_4.tif:0012-0830	1.507	23.094	0	113	141.582	94.263	0.924	34.808	2702	1.041	0.961	0.983
1266	PIDD1_KAN626-8_4.tif:0013-0838	1.237	14.844	0	69	45.504	95.122	0.936	18.357	1425	1.101	0.908	0.985
1267	PIDD1_KAN626-8_4.tif:0014-0842	0.721	16.679	0	53	28.262	95.624	0.92	12.032	934	1.143	0.875	1
1268	PIDD1_KAN626-8_4.tif:0015-1074	1.469	19.702	0	79	127.502	121.941	0.927	28.934	2246	1.022	0.979	0.974
1269	PIDD1_KAN626-8_4.tif:0016-1101	0.824	20.844	0	79	60.269	124.964	0.914	17.185	1334	1	1	1
1270	PIDD1_KAN626-8_4.tif:0017-1132	1.366	17.849	0	66	47.784	128.539	0.957	24.373	1892	1.099	0.91	0.981
1271	PIDD1_KAN626-8_5.tif:0001-0093	0.928	27.458	0	84	9.421	10.612	0.903	25.468	1977	1.125	0.889	1
1272	PIDD1_KAN626-8_5.tif:0002-0273	1.25	14.124	0	67	57.828	31.054	0.916	17.649	1370	1.22	0.82	0.99
1273	PIDD1_KAN626-8_5.tif:0003-0286	1.25	35.99	0	149	49.027	32.456	0.946	44.972	3491	1.026	0.974	0.985
1274	PIDD1_KAN626-8_5.tif:0004-0555	0.824	27.031	0	95	93.751	62.993	0.914	22.286	1730	1	1	1
1275	PIDD1_KAN626-8_5.tif:0005-0589	0.812	16.333	0	68	27.461	66.858	0.937	13.256	1029	1.039	0.963	0.992
1276	PIDD1_KAN626-8_5.tif:0006-0591	0.631	24.878	0	70	78.599	67.135	0.935	15.703	1219	1	1	1
1277	PIDD1_KAN626-8_5.tif:0007-0802	1.147	32.281	0	138	20.776	91.079	0.909	37.011	2873	1.115	0.897	0.994
1278	PIDD1_KAN626-8_5.tif:0008-0871	1.481	19.983	0	95	53.76	98.906	0.935	29.603	2298	1.005	0.995	0.979
1279	PIDD1_KAN626-8_5.tif:0009-0911	1.34	23.106	0	95	38.505	103.407	0.939	30.956	2403	1.116	0.896	0.977
1280	PIDD1_KAN626-8_5.tif:0010-1174	0.799	12.323	0	53	94.546	133.249	0.96	9.842	764	1.081	0.925	0.984
										1887.65
1281	PIDD1_KAN626-9_1.tif:0001-0147	1.791	80.151	0	377	141.416	16.679	0.906	143.521	11141	1.051	0.951	0.982
1282	PIDD1_KAN626-9_1.tif:0002-0215	1.095	29.035	0	136	41.016	24.407	0.962	31.793	2468	1.139	0.878	0.977
1283	PIDD1_KAN626-9_1.tif:0003-0237	1.018	37.62	0	126	73.945	26.968	0.941	38.286	2972	1.001	0.999	0.988
1284	PIDD1_KAN626-9_1.tif:0004-0350	1.262	53.224	0	218	64.241	39.725	0.925	67.194	5216	1.052	0.95	0.99
1285	PIDD1_KAN626-9_1.tif:0005-0377	1.533	70.983	0	364	42.052	42.846	0.912	108.816	8447	1.044	0.958	0.992
1286	PIDD1_KAN626-9_1.tif:0006-0439	1.018	51.468	0	181	78.702	49.872	0.908	52.379	4066	1.058	0.946	0.988
1287	PIDD1_KAN626-9_1.tif:0007-0459	1.649	53.805	0	342	54.265	52.101	0.931	88.72	6887	1.238	0.808	0.952
1288	PIDD1_KAN626-9_1.tif:0008-0533	1.481	79.078	0	534	121.956	60.552	0.935	117.151	9094	1.128	0.887	0.983
1289	PIDD1_KAN626-9_1.tif:0009-0610	1.018	24	0	85	25.645	69.24	0.908	24.425	1896	1.252	0.799	0.994
1290	PIDD1_KAN626-9_1.tif:0010-0673	1.391	66.907	0	392	84.331	76.442	0.863	93.087	7226	1.333	0.75	1
1291	PIDD1_KAN626-9_1.tif:0011-0707	1.842	68.888	0	546	117.294	80.214	0.875	126.903	9851	1.279	0.782	0.966
1292	PIDD1_KAN626-9_1.tif:0012-0832	0.902	16.671	0	67	40.009	94.443	0.947	15.034	1167	1.125	0.889	0.986
1293	PIDD1_KAN626-9_1.tif:0013-1257	1.043	70.593	0	288	71.902	142.726	0.899	73.661	5718	1	1	1
1294	PIDD1_KAN626-9_2.tif:0001-0069	0.824	46.641	0	160	71.165	7.832	0.914	38.454	2985	1	1	1
1295	PIDD1_KAN626-9_2.tif:0002-0653	0.721	35.411	0	142	30.078	74.172	0.92	25.546	1983	1.143	0.875	1
1296	PIDD1_KAN626-9_2.tif:0003-0836	1.25	53.969	0	263	69.336	94.902	0.916	67.439	5235	1.066	0.938	0.985
1297	PIDD1_KAN626-9_2.tif:0004-1079	1.25	30.371	0	174	96.016	122.461	0.946	37.951	2946	1.026	0.974	0.985
1298	PIDD1_KAN626-9_2.tif:0005-1235	1.031	46.75	0	175	111.519	140.224	0.919	48.18	3740	1.031	0.97	0.994
1299	PIDD1_KAN626-9_3.tif:0001-0112	1.25	61.866	0	243	29.856	12.717	0.946	77.306	6001	1.026	0.974	0.985
1300	PIDD1_KAN626-9_3.tif:0002-0370	1.636	64.386	0	311	86.483	42.064	0.935	105.338	8177	1.108	0.903	0.984
1301	PIDD1_KAN626-9_3.tif:0003-0440	0.824	75.453	0	199	112.252	49.94	0.914	62.208	4829	1	1	1
1302	PIDD1_KAN626-9_3.tif:0004-0611	1.147	44.36	0	133	22.194	69.343	0.909	50.859	3948	1.115	0.897	0.994
1303	PIDD1_KAN626-9_3.tif:0005-0694	0.812	15.238	0	82	45.293	78.763	0.937	12.367	960	1.039	0.963	0.992
1304	PIDD1_KAN626-9_3.tif:0006-0741	1.52	88.28	0	597	88.695	84.155	0.931	134.194	10417	1.022	0.979	0.987
1305	PIDD1_KAN626-9_3.tif:0007-0744	1.932	69.853	0	582	134.265	84.427	0.863	134.98	10478	1.257	0.796	0.946
1306	PIDD1_KAN626-9_3.tif:0008-0894	0.928	20.278	0	136	10.215	101.526	0.903	18.808	1460	1.125	0.889	1
1307	PIDD1_KAN626-9_3.tif:0009-0969	0.824	50.484	0	208	113.046	109.982	0.914	41.623	3231	1	1	1
1308	PIDD1_KAN626-9_3.tif:0010-1063	1.739	59.993	0	353	80.163	120.706	0.929	104.333	8099	1.198	0.835	0.975
1309	PIDD1_KAN626-9_3.tif:0011-1128	1.043	62.951	0	308	27.978	128.085	0.899	65.687	5099	1	1	1
1310	PIDD1_KAN626-9_4.tif:0001-0007	1.649	16.266	0	76	47.071	0.766	0.881	26.821	2082	1.455	0.687	0.959
1311	PIDD1_KAN626-9_4.tif:0002-0028	1.108	46.802	0	135	88.651	3.245	0.909	51.851	4025	1.169	0.855	0.977
1312	PIDD1_KAN626-9_4.tif:0003-0121	0.812	17.159	0	57	19.528	13.727	0.937	13.926	1081	1.039	0.963	0.992
1313	PIDD1_KAN626-9_4.tif:0004-0140	1.507	61.538	0	489	68.497	15.947	0.847	92.752	7200	1.444	0.692	1
1314	PIDD1_KAN626-9_4.tif:0005-0199	1.907	56.277	0	344	36.184	22.619	0.93	107.296	8329	1.099	0.91	0.983
1315	PIDD1_KAN626-9_4.tif:0006-0265	1.726	48.739	0	245	119.345	30.078	0.82	84.134	6531	1.498	0.667	0.931
1316	PIDD1_KAN626-9_4.tif:0007-0306	1.636	50.717	0	369	8.17	34.801	0.935	82.975	6441	1.116	0.896	0.981
1317	PIDD1_KAN626-9_4.tif:0008-0374	2.138	80.169	0	574	97.677	42.479	0.922	171.437	13308	1.07	0.935	0.962
1318	PIDD1_KAN626-9_4.tif:0009-0602	1.043	65.358	0	309	53.856	68.384	0.899	68.199	5294	1	1	1
1319	PIDD1_KAN626-9_4.tif:0010-0670	1.417	80.582	0	533	130.468	76.045	0.879	114.188	8864	1.1	0.909	1
1320	PIDD1_KAN626-9_4.tif:0011-0809	1.816	67.887	0	421	101.63	91.833	0.863	123.309	9572	1.172	0.853	0.949
1321	PIDD1_KAN626-9_4.tif:0012-0814	1.855	42.799	0	284	83.828	92.428	0.895	79.393	6163	1.349	0.741	0.944
1322	PIDD1_KAN626-9_4.tif:0013-0876	1.778	42.246	0	299	46.762	99.426	0.775	75.104	5830	1.534	0.652	0.902
1323	PIDD1_KAN626-9_4.tif:0014-0951	1.018	38.671	0	174	19.125	107.984	0.941	39.355	3055	1.001	0.999	0.988
1324	PIDD1_KAN626-9_4.tif:0015-1053	0.721	21.161	0	74	41.825	119.516	0.92	15.265	1185	1.143	0.875	1
1325	PIDD1_KAN626-9_4.tif:0016-1066	1.378	55.57	0	246	113.949	121.052	0.908	76.598	5946	1.127	0.887	0.986
1326	PIDD1_KAN626-9_4.tif:0017-1193	1.327	52.117	0	307	91.938	135.478	0.93	69.152	5368	1.153	0.867	0.967
1327	PIDD1_KAN626-9_5.tif:0001-0068	1.018	13.722	0	61	52.267	7.763	0.941	13.964	1084	1.001	0.999	0.988
1328	PIDD1_KAN626-9_5.tif:0002-0081	1.945	55.788	0	424	21.524	9.227	0.914	108.52	8424	1.118	0.895	0.953
1329	PIDD1_KAN626-9_5.tif:0003-0091	2.035	66.038	0	289	143.095	10.312	0.933	134.413	10434	1.166	0.857	0.981
1330	PIDD1_KAN626-9_5.tif:0004-0130	1.34	30.26	0	162	103.729	14.811	0.939	40.54	3147	1.131	0.884	0.977
1331	PIDD1_KAN626-9_5.tif:0005-0158	0.721	34.036	0	118	2.1	17.933	0.92	24.554	1906	1.143	0.875	1
1332	PIDD1_KAN626-9_5.tif:0006-0183	1.108	47.779	0	271	19.692	20.76	0.94	52.933	4109	1.129	0.886	0.977
1333	PIDD1_KAN626-9_5.tif:0007-0193	1.804	44.557	0	157	45.455	21.914	0.857	80.359	6238	1.581	0.633	0.969
1334	PIDD1_KAN626-9_5.tif:0008-0239	1.816	56.348	0	344	90.67	27.165	0.909	102.349	7945	1.187	0.842	0.949
1335	PIDD1_KAN626-9_5.tif:0009-0252	1.018	23.747	0	138	7.661	28.67	0.941	24.167	1876	1.001	0.999	0.988
1336	PIDD1_KAN626-9_5.tif:0010-0331	1.443	48.723	0	270	106.193	37.616	0.911	70.298	5457	1.183	0.845	0.974
1337	PIDD1_KAN626-9_5.tif:0011-0485	1.211	35.213	0	190	76.386	55.039	0.917	42.64	3310	1.093	0.915	0.969
1338	PIDD1_KAN626-9_5.tif:0012-0691	0.812	20.492	0	168	4.534	78.435	0.937	16.631	1291	1.039	0.963	0.992
1339	PIDD1_KAN626-9_5.tif:0013-0857	1.494	67.216	0	344	44.047	97.279	0.916	100.443	7797	1.203	0.831	0.983
1340	PIDD1_KAN626-9_5.tif:0014-0913	1.739	58.23	0	419	66.167	103.672	0.871	101.267	7861	1.325	0.755	0.931
										5448.17
1	PIDD1_KAN626-10_1.tif:0001-0070	1.391	91.046	0	747	116.905	8.002	0.916	126.671	9833	1.112	0.9	0.991
2	PIDD1_KAN626-10_1.tif:0002-0146	1.275	87.798	0	437	73.77	16.576	0.905	111.973	8692	1.025	0.975	0.995
3	PIDD1_KAN626-10_1.tif:0003-0215	1.739	67.696	0	477	3.887	24.433	0.904	117.731	9139	1.201	0.833	0.978
4	PIDD1_KAN626-10_1.tif:0004-0342	2.01	96.641	0	724	119.382	38.785	0.898	194.213	15076	1.176	0.851	0.969
5	PIDD1_KAN626-10_1.tif:0005-0357	2.435	63.799	0	434	52.327	40.524	0.882	155.334	12058	1.333	0.75	0.992
6	PIDD1_KAN626-10_1.tif:0006-0435	1.765	74.139	0	497	20.373	49.454	0.87	130.845	10157	1.198	0.835	0.979
7	PIDD1_KAN626-10_1.tif:0007-0457	1.7	47.273	0	309	42.261	51.908	0.76	80.385	6240	1.472	0.679	0.877
8	PIDD1_KAN626-10_1.tif:0008-0498	1.688	58.046	0	373	114.612	56.539	0.877	97.957	7604	1.203	0.831	0.963
9	PIDD1_KAN626-10_1.tif:0009-0776	1.507	73.538	0	306	109.742	88.071	0.897	110.839	8604	1.195	0.837	0.987
10	PIDD1_KAN626-10_1.tif:0010-0778	2.113	102.652	0	913	56.452	88.317	0.889	216.873	16835	1.321	0.757	0.968
11	PIDD1_KAN626-10_1.tif:0011-0846	1.868	79.138	0	557	60.154	96.086	0.935	147.824	11475	1.139	0.878	0.967
12	PIDD1_KAN626-10_1.tif:0012-0862	1.984	68.974	0	410	32.456	97.849	0.843	136.835	10622	1.297	0.771	0.957
13	PIDD1_KAN626-10_1.tif:0013-1038	2.1	88.945	0	844	134.272	117.89	0.884	186.767	14498	1.163	0.86	0.956
14	PIDD1_KAN626-10_1.tif:0014-1049	2.01	94.744	0	790	104.493	119.03	0.898	190.4	14780	1.183	0.845	0.969
15	PIDD1_KAN626-10_1.tif:0015-1065	1.662	87.093	0	472	38.319	120.873	0.898	144.732	11235	1.089	0.918	0.989
16	PIDD1_KAN626-10_2.tif:0001-0065	1.108	18.988	0	150	108.609	7.443	0.94	21.037	1633	1.16	0.862	0.983
17	PIDD1_KAN626-10_2.tif:0002-0257	1.391	83.528	0	431	122.58	29.226	0.916	116.211	9021	1.112	0.9	0.991
18	PIDD1_KAN626-10_2.tif:0003-0349	1.404	87.376	0	449	84.382	39.616	0.897	122.691	9524	1.103	0.907	0.995
19	PIDD1_KAN626-10_2.tif:0004-0476	1.971	52.68	0	235	37.642	54.031	0.871	103.831	8060	1.394	0.717	0.927
20	PIDD1_KAN626-10_2.tif:0005-0508	1.778	88.594	0	473	38.477	57.665	0.924	157.498	12226	1.006	0.994	0.979
21	PIDD1_KAN626-10_2.tif:0006-0528	2.602	90.396	0	922	101.772	59.977	0.815	235.23	18260	1.54	0.649	0.916
22	PIDD1_KAN626-10_2.tif:0007-0611	1.043	74.074	0	533	88.019	69.405	0.899	77.294	6000	1	1	1
23	PIDD1_KAN626-10_2.tif:0008-0835	2.795	73.12	0	781	99.019	94.729	0.807	204.403	15867	1.772	0.564	0.954
24	PIDD1_KAN626-10_2.tif:0009-0891	1.404	21.899	0	228	18.784	101.185	1	30.75	2387	1	1	0.965
25	PIDD1_KAN626-10_2.tif:0010-0902	2.242	58.483	0	539	65.395	102.43	0.842	131.09	10176	1.488	0.672	0.933
26	PIDD1_KAN626-10_2.tif:0011-1066	2.409	73.524	0	688	61.929	120.989	0.746	177.118	13749	1.626	0.615	0.888
27	PIDD1_KAN626-10_2.tif:0012-1101	1.159	66.689	0	233	13.166	125.02	0.89	77.319	6002	1.111	0.9	1
28	PIDD1_KAN626-10_2.tif:0013-1126	1.829	63.599	0	298	37.981	127.893	0.734	116.34	9031	1.762	0.567	0.902
29	PIDD1_KAN626-10_2.tif:0014-1197	0.902	15.243	0	71	142.783	135.916	0.947	13.745	1067	1.146	0.873	0.986
30	PIDD1_KAN626-10_2.tif:0015-1266	0.812	12.952	0	48	117.012	143.697	0.937	10.512	816	1.039	0.963	0.992
31	PIDD1_KAN626-10_3.tif:0001-0040	1.649	99.664	0	761	43.859	4.539	0.916	164.339	12757	1.102	0.907	0.985
32	PIDD1_KAN626-10_3.tif:0002-0188	1.52	90.907	0	555	110.933	21.381	0.905	138.188	10727	1.06	0.944	0.992
33	PIDD1_KAN626-10_3.tif:0003-0224	2.151	106.21	0	941	21.306	25.481	0.855	228.493	17737	1.333	0.75	0.946
34	PIDD1_KAN626-10_3.tif:0004-0427	2.087	84.204	0	754	59.642	48.439	0.81	175.727	13641	1.504	0.665	0.915
35	PIDD1_KAN626-10_3.tif:0005-0542	1.945	78.536	0	385	118.767	61.531	0.878	152.771	11859	1.276	0.783	0.993
36	PIDD1_KAN626-10_3.tif:0006-0542	1.623	78.516	0	448	24.467	61.517	0.928	127.444	9893	1.122	0.891	0.981
37	PIDD1_KAN626-10_3.tif:0007-0742	2.151	75.096	0	693	46.521	84.25	0.896	161.556	12541	1.347	0.743	0.941
38	PIDD1_KAN626-10_3.tif:0008-0749	0.631	10.245	0	71	57.601	85.068	0.935	6.467	502	1	1	1
39	PIDD1_KAN626-10_3.tif:0009-0815	1.752	102.147	0	803	78.794	92.497	0.911	178.96	13892	1.066	0.938	0.975
40	PIDD1_KAN626-10_3.tif:0010-0840	1.224	29.758	0	126	126.197	95.344	0.957	36.418	2827	1.073	0.932	0.979
41	PIDD1_KAN626-10_3.tif:0011-0866	2.023	74.287	0	570	79.231	98.349	0.917	150.246	11663	1.369	0.731	0.96
42	PIDD1_KAN626-10_3.tif:0012-0873	1.378	67.43	0	408	9.822	99.081	0.908	92.945	7215	1.127	0.887	0.986
43	PIDD1_KAN626-10_3.tif:0013-1049	0.824	30.516	0	120	127.347	119.062	0.914	25.159	1953	1	1	1
44	PIDD1_KAN626-10_3.tif:0014-1102	2.126	49.339	0	437	54.154	125.034	0.763	104.874	8141	1.68	0.595	0.894
45	PIDD1_KAN626-10_3.tif:0015-1153	1.159	73.156	0	344	4.937	130.866	0.89	84.817	6584	1.111	0.9	1
46	PIDD1_KAN626-10_3.tif:0016-1165	1.159	84.289	0	515	81.096	132.228	0.89	97.725	7586	1.111	0.9	1
47	PIDD1_KAN626-10_4.tif:0001-0036	1.404	85.532	0	436	132.79	4.148	0.897	120.101	9323	1.103	0.907	0.995
48	PIDD1_KAN626-10_4.tif:0002-0107	1.159	82.378	0	385	64.014	12.201	0.89	95.509	7414	1.111	0.9	1
49	PIDD1_KAN626-10_4.tif:0003-0162	1.907	70.959	0	630	102.871	18.454	0.802	135.289	10502	1.391	0.719	0.897
50	PIDD1_KAN626-10_4.tif:0004-0164	1.043	78.346	0	626	13.336	18.671	0.899	81.751	6346	1	1	1
51	PIDD1_KAN626-10_4.tif:0005-0175	1.043	70.877	0	575	11.066	19.919	0.899	73.957	5741	1	1	1
52	PIDD1_KAN626-10_4.tif:0006-0195	1.159	91.1	0	895	111.571	22.189	0.89	105.622	8199	1.111	0.9	1
53	PIDD1_KAN626-10_4.tif:0007-0264	1.043	56.642	0	432	41.938	30.021	0.899	59.104	4588	1	1	1
54	PIDD1_KAN626-10_4.tif:0008-0280	1.043	67.259	0	292	122.069	31.837	0.899	70.183	5448	1	1	1
55	PIDD1_KAN626-10_4.tif:0009-0311	1.623	59.77	0	277	44.946	35.355	0.955	97.016	7531	1.104	0.905	0.977
56	PIDD1_KAN626-10_4.tif:0010-0313	1.134	34.489	0	121	85.579	35.572	0.93	39.098	3035	1.111	0.9	0.989
57	PIDD1_KAN626-10_4.tif:0011-0341	1.378	70.215	0	521	33.543	38.699	0.908	96.784	7513	1.127	0.887	0.986
58	PIDD1_KAN626-10_4.tif:0012-0343	1.159	68.289	0	334	74.853	38.931	0.89	79.174	6146	1.111	0.9	1
59	PIDD1_KAN626-10_4.tif:0013-0351	1.159	76.8	0	710	23.324	39.839	0.89	89.042	6912	1.111	0.9	1
60	PIDD1_KAN626-10_4.tif:0014-0384	1.159	68.589	0	313	127.631	43.584	0.89	79.522	6173	1.111	0.9	1
61	PIDD1_KAN626-10_4.tif:0015-0385	1.043	77.321	0	552	15.379	43.754	0.899	80.682	6263	1	1	1
62	PIDD1_KAN626-10_4.tif:0016-0388	1.043	55.778	0	387	100.958	44.095	0.899	58.202	4518	1	1	1
63	PIDD1_KAN626-10_4.tif:0017-0463	1.043	75	0	417	133.873	52.607	0.899	78.26	6075	1	1	1
64	PIDD1_KAN626-10_4.tif:0018-0515	1.159	75.156	0	668	118.267	58.509	0.89	87.136	6764	1.111	0.9	1
65	PIDD1_KAN626-10_4.tif:0019-0547	1.043	74.481	0	727	87.338	62.141	0.899	77.719	6033	1	1	1
66	PIDD1_KAN626-10_4.tif:0020-0568	1.159	110.222	0	1034	89.154	64.468	0.89	127.792	9920	1.111	0.9	1
67	PIDD1_KAN626-10_4.tif:0021-0577	1.043	64.383	0	398	85.068	65.546	0.899	67.181	5215	1	1	1
68	PIDD1_KAN626-10_4.tif:0022-0661	2.357	107.656	0	1171	75.8	75.006	0.885	253.793	19701	1.109	0.902	0.943
69	PIDD1_KAN626-10_4.tif:0023-0682	0.721	21.911	0	60	113.557	77.407	0.92	15.807	1227	1.143	0.875	1
70	PIDD1_KAN626-10_4.tif:0024-0700	1.25	12.144	0	47	34.799	79.507	0.916	15.175	1178	1.22	0.82	0.99
71	PIDD1_KAN626-10_4.tif:0025-0704	1.043	72.037	0	695	5.845	79.961	0.899	75.168	5835	1	1	1
72	PIDD1_KAN626-10_4.tif:0026-0738	1.262	93.612	0	1076	76.386	83.763	0.925	118.182	9174	1.052	0.95	0.99
73	PIDD1_KAN626-10_4.tif:0027-0839	1.043	71.012	0	437	97.78	95.283	0.899	74.099	5752	1	1	1
74	PIDD1_KAN626-10_4.tif:0028-0861	0.928	65.222	0	210	92.73	97.78	0.903	60.495	4696	1.125	0.889	1
75	PIDD1_KAN626-10_4.tif:0029-0862	1.043	61.914	0	319	99.256	97.894	0.899	64.604	5015	1	1	1
76	PIDD1_KAN626-10_4.tif:0030-0868	1.636	78.504	0	417	138.636	98.523	0.909	128.436	9970	1.114	0.898	0.981
77	PIDD1_KAN626-10_4.tif:0031-0933	1.043	69.185	0	243	91.878	105.952	0.899	72.192	5604	1	1	1
78	PIDD1_KAN626-10_4.tif:0032-0984	1.971	93.641	0	877	71.86	111.721	0.903	184.564	14327	1.017	0.983	0.953
79	PIDD1_KAN626-10_4.tif:0033-0998	1.404	136.972	0	1563	91.486	113.325	0.897	192.332	14930	1.103	0.907	0.995
80	PIDD1_KAN626-10_4.tif:0034-1030	1.52	95.271	0	604	115.875	116.915	0.879	144.822	11242	1.209	0.827	0.992
81	PIDD1_KAN626-10_4.tif:0035-1044	1.043	81.58	0	616	17.195	118.551	0.899	85.126	6608	1	1	1
82	PIDD1_KAN626-10_4.tif:0036-1103	1.043	73.284	0	297	56.353	125.247	0.899	76.469	5936	1	1	1
83	PIDD1_KAN626-10_4.tif:0037-1137	1.378	76.159	0	551	23.726	129.102	0.908	104.977	8149	1.127	0.887	0.986
84	PIDD1_KAN626-10_4.tif:0038-1173	1.366	68.896	0	512	107.825	133.192	0.899	94.079	7303	1.145	0.873	0.981
85	PIDD1_KAN626-10_4.tif:0039-1193	1.043	50.432	0	389	134.441	135.462	0.899	52.624	4085	1	1	1
86	PIDD1_KAN626-10_5.tif:0001-0130	1.043	70.642	0	277	43.754	14.812	0.899	73.712	5722	1	1	1
87	PIDD1_KAN626-10_5.tif:0002-0131	0.721	55.339	0	146	91.822	14.925	0.92	39.922	3099	1.143	0.875	1
88	PIDD1_KAN626-10_5.tif:0003-0145	1.043	54.556	0	245	48.181	16.514	0.899	56.927	4419	1	1	1
89	PIDD1_KAN626-10_5.tif:0004-0148	1.043	70.148	0	274	42.733	16.855	0.899	73.197	5682	1	1	1
90	PIDD1_KAN626-10_5.tif:0005-0160	1.159	110.422	0	890	23.949	18.217	0.89	128.024	9938	1.111	0.9	1
91	PIDD1_KAN626-10_5.tif:0006-0179	2.151	89.557	0	527	15.328	20.386	0.951	192.667	14956	1.11	0.901	0.971
92	PIDD1_KAN626-10_5.tif:0007-0183	1.043	51.148	0	437	114.919	20.827	0.899	53.371	4143	1	1	1
93	PIDD1_KAN626-10_5.tif:0008-0189	2.499	74.789	0	493	45.855	21.449	0.888	186.909	14509	1.278	0.782	0.939
94	PIDD1_KAN626-10_5.tif:0009-0207	1.262	71.01	0	606	79.223	23.495	0.925	89.648	6959	1.052	0.95	0.99
95	PIDD1_KAN626-10_5.tif:0010-0233	1.533	95.824	0	669	24.469	26.494	0.887	146.896	11403	1.04	0.962	0.992
96	PIDD1_KAN626-10_5.tif:0011-0260	1.121	53.908	0	178	94.939	29.516	0.951	60.418	4690	1.135	0.881	0.983
97	PIDD1_KAN626-10_5.tif:0012-0293	1.623	92.413	0	708	30.693	33.232	0.877	150.001	11644	1.115	0.897	0.977
98	PIDD1_KAN626-10_5.tif:0013-0312	1.262	74.776	0	477	16.458	35.412	0.925	94.401	7328	1.052	0.95	0.99
99	PIDD1_KAN626-10_5.tif:0014-0323	1.043	77.16	0	653	41.938	36.717	0.899	80.514	6250	1	1	1
100	PIDD1_KAN626-10_5.tif:0015-0354	1.275	84.909	0	236	125.02	40.236	0.877	108.288	8406	1.222	0.818	1
101	PIDD1_KAN626-10_5.tif:0016-0363	2.242	91.149	0	690	70.599	41.261	0.912	204.313	15860	1.175	0.851	0.961
102	PIDD1_KAN626-10_5.tif:0017-0390	0.721	27.214	0	115	113.5	44.322	0.92	19.633	1524	1.143	0.875	1
103	PIDD1_KAN626-10_5.tif:0018-0455	1.043	62.247	0	486	45.911	51.699	0.899	64.952	5042	1	1	1
104	PIDD1_KAN626-10_5.tif:0019-0515	1.507	83.256	0	543	19.509	58.448	0.897	125.486	9741	1.205	0.83	0.987
105	PIDD1_KAN626-10_5.tif:0020-0522	1.043	63.296	0	573	142.272	59.304	0.899	66.047	5127	1	1	1
106	PIDD1_KAN626-10_5.tif:0021-0543	1.945	52.49	0	478	74.904	61.648	0.848	102.105	7926	1.44	0.695	0.962
107	PIDD1_KAN626-10_5.tif:0022-0579	1.262	80.888	0	784	74.57	65.717	0.925	102.118	7927	1.052	0.95	0.99
108	PIDD1_KAN626-10_5.tif:0023-0695	2.486	67.539	0	719	103.021	78.93	0.904	167.92	13035	1.41	0.709	0.951
109	PIDD1_KAN626-10_5.tif:0024-0697	1.043	53.815	0	344	20.373	79.166	0.899	56.154	4359	1	1	1
110	PIDD1_KAN626-10_5.tif:0025-0727	1.816	64.745	0	395	11.173	82.562	0.841	117.602	9129	1.315	0.761	0.956
111	PIDD1_KAN626-10_5.tif:0026-0814	2.061	75.356	0	534	79.708	92.483	0.847	155.321	12057	1.195	0.837	0.938
112	PIDD1_KAN626-10_5.tif:0027-0880	1.804	132.514	0	883	57.87	99.897	0.913	238.992	18552	1.065	0.939	0.989
113	PIDD1_KAN626-10_5.tif:0028-0949	1.043	59.123	0	519	130.241	107.768	0.899	61.693	4789	1	1	1
114	PIDD1_KAN626-10_5.tif:0029-1045	1.043	47.654	0	445	111.968	118.664	0.899	49.725	3860	1	1	1
115	PIDD1_KAN626-10_5.tif:0030-1070	1.391	65.861	0	393	30.588	121.454	0.916	91.631	7113	1.189	0.841	0.991
116	PIDD1_KAN626-10_5.tif:0031-1123	1.043	69.37	0	343	107.768	127.517	0.899	72.385	5619	1	1	1
117	PIDD1_KAN626-10_5.tif:0032-1178	1.675	108.785	0	743	104.477	133.703	0.905	182.181	14142	1.1	0.909	0.992
118	PIDD1_KAN626-10_5.tif:0033-1204	1.52	90.127	0	686	54.192	136.716	0.931	137.003	10635	1.063	0.941	0.987
										8442.04
119	PIDD1_KAN626-11_1.tif:0001-0101	2.345	93.247	0	872	42.617	11.466	0.922	218.625	16971	1.332	0.751	0.95
120	PIDD1_KAN626-11_1.tif:0002-0147	1.778	91.92	0	597	35.056	16.7	0.924	163.411	12685	1.101	0.908	0.982
121	PIDD1_KAN626-11_1.tif:0003-0221	1.919	117.329	0	1076	74.914	25.145	0.936	225.208	17482	1.117	0.895	0.983
122	PIDD1_KAN626-11_1.tif:0004-0260	1.043	69.259	0	274	126.269	29.567	0.899	72.269	5610	1	1	1
123	PIDD1_KAN626-11_1.tif:0005-0295	2.512	67.662	0	515	101.732	33.485	0.854	169.968	13194	1.574	0.635	0.956
124	PIDD1_KAN626-11_1.tif:0006-0327	2.319	56.733	0	339	8.522	37.171	0.851	131.554	10212	1.405	0.712	0.933
125	PIDD1_KAN626-11_1.tif:0007-0345	1.997	69.006	0	309	42.418	39.269	0.782	137.789	10696	1.542	0.649	0.945
126	PIDD1_KAN626-11_1.tif:0008-0399	1.443	26.098	0	112	138.12	45.276	0.938	37.655	2923	1.22	0.819	0.974
127	PIDD1_KAN626-11_1.tif:0009-0542	1.456	64.805	0	436	111.463	61.509	0.919	94.337	7323	1.237	0.808	0.974
128	PIDD1_KAN626-11_1.tif:0010-0663	1.585	95.577	0	731	47.717	75.273	0.932	151.444	11756	1.16	0.862	0.976
129	PIDD1_KAN626-11_1.tif:0011-0703	1.52	83.483	0	538	90.076	79.842	0.905	126.903	9851	1.018	0.982	0.987
130	PIDD1_KAN626-11_1.tif:0012-0737	2.061	64.144	0	578	25.368	83.65	0.911	132.211	10263	1.328	0.753	0.964
131	PIDD1_KAN626-11_1.tif:0013-0868	1.443	35.214	0	280	114.644	98.526	0.938	50.808	3944	1.216	0.822	0.97
132	PIDD1_KAN626-11_1.tif:0014-0947	1.907	67.236	0	489	17.757	107.557	0.896	128.191	9951	1.307	0.765	0.955
133	PIDD1_KAN626-11_1.tif:0015-0960	1.147	15.753	0	69	70.818	109.012	0.909	18.061	1402	1.115	0.897	0.994
134	PIDD1_KAN626-11_2.tif:0001-0024	2.1	47.589	0	345	78.138	2.747	0.684	99.928	7757	1.986	0.504	0.86
135	PIDD1_KAN626-11_2.tif:0002-0038	0.902	11.057	0	44	129.265	4.37	0.947	9.971	774	1.125	0.889	0.986
136	PIDD1_KAN626-11_2.tif:0003-0097	2.718	68.919	0	809	24.147	11.126	0.719	187.334	14542	1.828	0.547	0.904
137	PIDD1_KAN626-11_2.tif:0004-0145	1.121	29.092	0	119	112.191	16.463	0.951	32.605	2531	1.135	0.881	0.983
138	PIDD1_KAN626-11_2.tif:0005-0262	2.68	78.721	0	666	11.412	29.775	0.789	210.934	16374	1.481	0.675	0.912
139	PIDD1_KAN626-11_2.tif:0006-0268	2.654	79.864	0	597	105.482	30.401	0.875	211.939	16452	1.27	0.787	0.936
140	PIDD1_KAN626-11_2.tif:0007-0349	2.332	82.039	0	798	74.422	39.606	0.896	191.289	14849	1.341	0.746	0.943
141	PIDD1_KAN626-11_2.tif:0008-0352	1.404	77.982	0	338	39.266	40.014	0.897	109.499	8500	1.103	0.907	0.995
142	PIDD1_KAN626-11_2.tif:0009-0406	2.396	97.258	0	959	2.075	46.127	0.815	233.04	18090	1.4	0.714	0.919
143	PIDD1_KAN626-11_2.tif:0010-0411	1.894	100.612	0	580	57.425	46.719	0.923	190.529	14790	1.146	0.872	0.977
144	PIDD1_KAN626-11_2.tif:0011-0608	1.662	105.744	0	612	5.291	69.004	0.898	175.727	13641	1.096	0.912	0.989
145	PIDD1_KAN626-11_2.tif:0012-0649	1.353	11.048	0	89	29.495	73.72	0.919	14.943	1160	1.131	0.884	0.977
146	PIDD1_KAN626-11_2.tif:0013-0709	2.473	66.995	0	695	91.501	80.474	0.714	165.704	12863	1.687	0.593	0.867
147	PIDD1_KAN626-11_2.tif:0014-0708	1.662	86.535	0	391	109.135	80.363	0.923	143.805	11163	1.093	0.915	0.989
148	PIDD1_KAN626-11_2.tif:0015-0798	2.396	50.586	0	299	80.061	90.578	0.691	121.209	9409	1.734	0.577	0.849
149	PIDD1_KAN626-11_2.tif:0016-0811	2.448	62.7	0	666	129.07	92.1	0.79	153.466	11913	1.684	0.594	0.905
150	PIDD1_KAN626-11_2.tif:0017-0988	2.576	66.605	0	823	51.305	112.164	0.737	171.604	13321	1.628	0.614	0.866
151	PIDD1_KAN626-11_2.tif:0018-0998	2.422	50.059	0	336	108.801	113.333	0.789	121.235	9411	1.906	0.525	0.949
152	PIDD1_KAN626-11_2.tif:0019-1084	1.597	79.355	0	451	78.488	123.031	0.913	126.761	9840	1.111	0.9	0.969
153	PIDD1_KAN626-11_2.tif:0020-1084	1.043	62.889	0	257	3.235	123.091	0.899	65.622	5094	1	1	1
154	PIDD1_KAN626-11_2.tif:0021-1161	1.275	69.515	0	321	35.077	131.779	0.905	88.656	6882	1.025	0.975	0.995
155	PIDD1_KAN626-11_3.tif:0001-0099	1.275	68.303	0	400	106.241	11.242	0.905	87.11	6762	1.025	0.975	0.995
156	PIDD1_KAN626-11_3.tif:0002-0307	1.507	47.41	0	208	92.332	34.901	0.847	71.458	5547	1.444	0.692	1
157	PIDD1_KAN626-11_3.tif:0003-0368	2.383	78.184	0	674	116.559	41.719	0.855	186.329	14464	1.471	0.68	0.966
158	PIDD1_KAN626-11_3.tif:0004-0374	1.533	92.118	0	730	43.195	42.496	0.887	141.215	10962	1.04	0.962	0.992
159	PIDD1_KAN626-11_3.tif:0005-0550	1.031	10.7	0	60	129.277	62.425	0.887	11.027	856	1.25	0.8	1
160	PIDD1_KAN626-11_3.tif:0006-0631	2.164	81.78	0	969	76.102	71.704	0.777	176.989	13739	1.514	0.661	0.901
161	PIDD1_KAN626-11_3.tif:0007-0691	1.288	101.09	0	626	130.071	78.429	0.886	130.227	10109	1	1	1
162	PIDD1_KAN626-11_3.tif:0008-0787	1.275	64.586	0	316	55.62	89.33	0.905	82.369	6394	1.025	0.975	0.995
163	PIDD1_KAN626-11_3.tif:0009-0791	1.765	78.81	0	632	21.221	89.773	0.893	139.09	10797	1.398	0.715	0.989
164	PIDD1_KAN626-11_3.tif:0010-0926	1.404	76.44	0	336	48.072	105.106	0.897	107.335	8332	1.103	0.907	0.995
165	PIDD1_KAN626-11_3.tif:0011-0983	2.19	111.6	0	819	115.811	111.583	0.922	244.402	18972	1.128	0.887	0.974
166	PIDD1_KAN626-11_3.tif:0012-1039	0.812	33.159	0	80	26.212	117.933	0.937	26.911	2089	1.039	0.963	0.992
167	PIDD1_KAN626-11_3.tif:0013-1171	1.275	86.374	0	504	18.33	132.965	0.877	110.156	8551	1.222	0.818	1
168	PIDD1_KAN626-11_3.tif:0014-1176	1.688	98.87	0	558	68.322	133.528	0.887	166.851	12952	1.093	0.915	0.996
169	PIDD1_KAN626-11_3.tif:0015-1189	1.404	78.661	0	403	34.84	135.003	0.897	110.452	8574	1.103	0.907	0.995
170	PIDD1_KAN626-11_3.tif:0016-1240	1.391	79.074	0	388	124.065	140.787	0.889	110.014	8540	1.114	0.898	0.991
171	PIDD1_KAN626-11_3.tif:0017-1242	1.043	81.136	0	461	16.06	141.024	0.899	84.662	6572	1	1	1
172	PIDD1_KAN626-11_4.tif:0001-0215	0.631	81.735	0	603	144.774	24.413	0.84	51.593	4005	1.993	0.502	0.99
173	PIDD1_KAN626-11_4.tif:0002-0217	2.126	64.473	0	526	80.595	24.625	0.77	137.041	10638	1.669	0.599	0.938
174	PIDD1_KAN626-11_4.tif:0003-0353	1.662	93.109	0	523	69.855	40.07	0.923	154.729	12011	1.093	0.915	0.989
175	PIDD1_KAN626-11_4.tif:0004-0362	0.812	64.524	0	139	16.792	41.093	0.937	52.366	4065	1.039	0.963	0.992
176	PIDD1_KAN626-11_4.tif:0005-0405	0.721	14.536	0	54	31.269	45.968	0.92	10.486	814	1.143	0.875	1
177	PIDD1_KAN626-11_4.tif:0006-0440	1.018	65.722	0	285	137.619	50.008	0.941	66.885	5192	1.001	0.999	0.988
178	PIDD1_KAN626-11_4.tif:0007-0538	2.01	98.955	0	754	8.981	61.072	0.945	198.863	15437	1.177	0.85	0.972
179	PIDD1_KAN626-11_4.tif:0008-0598	1.919	70.899	0	620	123.189	67.838	0.789	136.088	10564	1.412	0.708	0.9
180	PIDD1_KAN626-11_4.tif:0009-0737	1.224	18.263	0	168	55.95	83.637	0.926	22.351	1735	1.068	0.936	0.974
181	PIDD1_KAN626-11_4.tif:0010-0773	2.138	48.952	0	250	42.829	87.722	0.75	104.681	8126	1.758	0.569	0.897
182	PIDD1_KAN626-11_4.tif:0011-0845	1.649	64.641	0	258	88.871	95.964	0.891	106.588	8274	1.303	0.768	0.992
183	PIDD1_KAN626-11_4.tif:0012-0858	1.134	72.068	0	405	32.527	97.371	0.899	81.699	6342	1.117	0.895	0.989
184	PIDD1_KAN626-11_4.tif:0013-0928	1.726	106.634	0	919	139.946	105.348	0.922	184.074	14289	1.024	0.977	0.968
185	PIDD1_KAN626-11_4.tif:0014-0936	1.262	56.367	0	252	129.617	106.236	0.925	71.162	5524	1.052	0.95	0.99
186	PIDD1_KAN626-11_4.tif:0015-0962	1.159	84.667	0	265	28.262	109.244	0.89	98.163	7620	1.111	0.9	1
187	PIDD1_KAN626-11_4.tif:0016-1115	2.203	79.55	0	608	82.9	126.591	0.808	175.237	13603	1.456	0.687	0.91
										9363.33
188	PIDD1_KAN626-12_1.tif:0001-0074	1.391	69.444	0	464	97.099	8.399	0.916	96.617	7500	1.112	0.9	0.991
189	PIDD1_KAN626-12_1.tif:0002-0154	1.997	78.594	0	634	46.401	17.536	0.915	156.932	12182	1.057	0.946	0.969
190	PIDD1_KAN626-12_1.tif:0003-0174	1.894	103.272	0	737	142.092	19.817	0.923	195.565	15181	1.171	0.854	0.983
191	PIDD1_KAN626-12_1.tif:0004-0218	1.636	85.378	0	575	23.385	24.787	0.935	139.682	10843	1.108	0.903	0.984
192	PIDD1_KAN626-12_1.tif:0005-0240	2.087	80.13	0	563	60.598	27.217	0.866	167.225	12981	1.196	0.836	0.982
193	PIDD1_KAN626-12_1.tif:0006-0307	1.404	84.697	0	531	99.989	34.896	0.897	118.929	9232	1.103	0.907	0.995
194	PIDD1_KAN626-12_1.tif:0007-0496	2.113	74.439	0	715	16.092	56.288	0.758	157.267	12208	1.459	0.686	0.877
195	PIDD1_KAN626-12_1.tif:0008-0564	0.915	37.183	0	112	60.944	64.064	0.924	34.009	2640	1.13	0.885	0.993
196	PIDD1_KAN626-12_1.tif:0009-0768	1.52	76.5	0	489	6.758	87.22	0.931	116.288	9027	1.022	0.979	0.987
197	PIDD1_KAN626-12_1.tif:0010-0771	1.868	100.338	0	701	128.442	87.486	0.935	187.424	14549	1.279	0.782	0.98
198	PIDD1_KAN626-12_1.tif:0011-0772	0.631	28.612	0	61	47.727	87.679	0.935	18.061	1402	1	1	1
199	PIDD1_KAN626-12_1.tif:0012-0974	1.018	22.532	0	92	131.944	110.606	0.941	22.93	1780	1.064	0.94	0.988
200	PIDD1_KAN626-12_1.tif:0013-1054	1.404	91.404	0	552	33.828	119.691	0.897	128.346	9963	1.103	0.907	0.995
201	PIDD1_KAN626-12_1.tif:0014-1120	1.649	69.516	0	380	125.029	127.121	0.916	114.626	8898	1.102	0.907	0.985
202	PIDD1_KAN626-12_1.tif:0015-1246	1.159	71.689	0	254	114.408	141.478	0.89	83.116	6452	1.111	0.9	1
203	PIDD1_KAN626-12_2.tif:0001-0029	2.113	53.817	0	376	37.062	3.35	0.801	113.699	8826	1.476	0.678	0.919
204	PIDD1_KAN626-12_2.tif:0002-0088	1.031	71.188	0	163	128.771	10.05	0.919	73.364	5695	1.031	0.97	0.994
205	PIDD1_KAN626-12_2.tif:0003-0108	2.113	72.152	0	564	52.253	12.272	0.889	152.436	11833	1.321	0.757	0.968
206	PIDD1_KAN626-12_2.tif:0004-0204	2.319	69.817	0	777	82.764	23.109	0.796	161.891	12567	1.407	0.711	0.928
207	PIDD1_KAN626-12_2.tif:0005-0297	1.262	32.347	0	164	54.14	33.71	0.925	40.837	3170	1.052	0.95	0.99
208	PIDD1_KAN626-12_2.tif:0006-0311	2.267	90.239	0	648	70.972	35.292	0.88	204.596	15882	1.358	0.736	0.962
209	PIDD1_KAN626-12_2.tif:0007-0330	1.855	77.549	0	340	7.727	37.508	0.929	143.856	11167	1.125	0.889	0.966
210	PIDD1_KAN626-12_2.tif:0008-0359	1.275	78.323	0	423	121.894	40.752	0.905	99.889	7754	1.025	0.975	0.995
211	PIDD1_KAN626-12_2.tif:0009-0612	1.043	61.457	0	479	71.902	69.519	0.899	64.128	4978	1	1	1
212	PIDD1_KAN626-12_2.tif:0010-0617	1.043	80.704	0	353	51.586	70.086	0.899	84.211	6537	1	1	1
213	PIDD1_KAN626-12_2.tif:0011-0645	0.992	16.766	0	95	72.583	73.264	0.987	16.631	1291	1	1	0.975
214	PIDD1_KAN626-12_2.tif:0012-0681	1.043	61.642	0	488	16.174	77.35	0.899	64.321	4993	1	1	1
215	PIDD1_KAN626-12_2.tif:0013-0718	2.074	71.41	0	600	85.147	81.479	0.844	148.107	11497	1.324	0.755	0.912
216	PIDD1_KAN626-12_2.tif:0014-0753	1.881	59.842	0	375	7.072	85.514	0.894	112.552	8737	1.28	0.781	0.98
217	PIDD1_KAN626-12_2.tif:0015-0835	2.01	65.673	0	576	101.423	94.888	0.787	131.979	10245	1.592	0.628	0.943
218	PIDD1_KAN626-12_2.tif:0016-0839	1.043	81.827	0	395	77.464	95.283	0.899	85.384	6628	1	1	1
219	PIDD1_KAN626-12_2.tif:0017-0962	1.932	62.9	0	443	66.88	109.19	0.813	121.544	9435	1.454	0.688	0.923
220	PIDD1_KAN626-12_2.tif:0018-0974	2.357	84.874	0	807	132.587	110.564	0.802	200.087	15532	1.387	0.721	0.91
221	PIDD1_KAN626-12_2.tif:0019-0972	1.043	51.802	0	383	43.414	110.379	0.899	54.054	4196	1	1	1
222	PIDD1_KAN626-12_2.tif:0020-0988	1.662	42.667	0	309	30.567	112.171	0.798	70.904	5504	1.728	0.579	0.977
223	PIDD1_KAN626-12_2.tif:0021-1125	1.043	57.457	0	404	89.041	127.744	0.899	59.954	4654	1	1	1
224	PIDD1_KAN626-12_3.tif:0001-0053	1.829	89.761	0	439	113.172	6.104	0.916	164.197	12746	1.091	0.916	0.959
225	PIDD1_KAN626-12_3.tif:0002-0138	1.043	67.049	0	328	137.959	15.72	0.899	69.964	5431	1	1	1
226	PIDD1_KAN626-12_3.tif:0003-0219	1.417	92.4	0	604	14.698	24.857	0.879	130.935	10164	1.1	0.909	1
227	PIDD1_KAN626-12_3.tif:0004-0255	1.043	90.272	0	593	20.033	28.999	0.899	94.195	7312	1	1	1
228	PIDD1_KAN626-12_3.tif:0005-0310	1.366	58.802	0	332	125.795	35.185	0.927	80.295	6233	1.107	0.903	0.981
229	PIDD1_KAN626-12_3.tif:0006-0328	1.546	108.725	0	534	79.956	37.28	0.894	168.075	13047	1.021	0.979	0.996
230	PIDD1_KAN626-12_3.tif:0007-0348	1.881	94.815	0	841	66.277	39.577	0.917	178.329	13843	1.1	0.909	0.97
231	PIDD1_KAN626-12_3.tif:0008-0367	0.915	44.113	0	106	8.462	41.66	0.924	40.347	3132	1.13	0.885	0.993
232	PIDD1_KAN626-12_3.tif:0009-0528	1.043	91.358	0	474	20.26	59.985	0.899	95.329	7400	1	1	1
233	PIDD1_KAN626-12_3.tif:0010-0624	1.043	39.802	0	172	81.777	70.881	0.899	41.532	3224	1	1	1
234	PIDD1_KAN626-12_3.tif:0011-0712	2.19	77.182	0	658	18.384	80.788	0.85	169.028	13121	1.3	0.769	0.934
235	PIDD1_KAN626-12_3.tif:0012-0717	2.847	62.887	0	545	55.28	81.386	0.688	179.038	13898	2.335	0.428	0.925
236	PIDD1_KAN626-12_3.tif:0013-0757	0.631	83.02	21	150	86.09	85.976	0.935	52.405	4068	1	1	1
237	PIDD1_KAN626-12_3.tif:0014-0859	1.765	81.255	0	622	33.931	97.479	0.893	143.405	11132	1.044	0.957	0.975
238	PIDD1_KAN626-12_3.tif:0015-0864	1.791	91.281	0	625	139.244	98.083	0.883	163.45	12688	1.081	0.925	0.986
239	PIDD1_KAN626-12_3.tif:0016-0998	1.417	113.936	0	698	11.918	113.33	0.879	161.453	12533	1.1	0.909	1
240	PIDD1_KAN626-12_3.tif:0017-1106	1.275	84.566	0	313	135.287	125.536	0.905	107.85	8372	1.025	0.975	0.995
241	PIDD1_KAN626-12_3.tif:0018-1116	1.507	79.812	0	666	62.019	126.731	0.924	120.294	9338	1.084	0.923	0.987
242	PIDD1_KAN626-12_3.tif:0019-1275	0.58	92.6	0	298	52.494	144.769	0.859	53.68	4167	1.8	0.556	1
243	PIDD1_KAN626-12_4.tif:0001-0077	1.043	60.914	0	224	29.907	8.796	0.899	63.561	4934	1	1	1
244	PIDD1_KAN626-12_4.tif:0002-0127	1.636	79.535	0	515	80.191	14.419	0.909	130.124	10101	1.137	0.879	0.984
245	PIDD1_KAN626-12_4.tif:0003-0141	1.391	81.778	0	388	36.32	16.06	0.916	113.776	8832	1.112	0.9	0.991
246	PIDD1_KAN626-12_4.tif:0004-0219	1.043	102.481	0	975	17.763	24.913	0.899	106.936	8301	1	1	1
247	PIDD1_KAN626-12_4.tif:0005-0225	1.043	56.864	0	362	60.893	25.594	0.899	59.336	4606	1	1	1
248	PIDD1_KAN626-12_4.tif:0006-0240	1.765	100.898	0	1080	6.237	27.214	0.893	178.071	13823	1.016	0.984	0.979
249	PIDD1_KAN626-12_4.tif:0007-0294	1.649	97.273	0	634	31.391	33.36	0.916	160.397	12451	1.121	0.892	0.988
250	PIDD1_KAN626-12_4.tif:0008-0319	2.074	61.652	0	620	96.399	36.222	0.786	127.869	9926	1.486	0.673	0.912
251	PIDD1_KAN626-12_4.tif:0009-0356	1.043	61.235	0	491	90.176	40.463	0.899	63.896	4960	1	1	1
252	PIDD1_KAN626-12_4.tif:0010-0366	1.907	79.203	0	354	48.586	41.612	0.883	151.006	11722	1.102	0.907	0.974
253	PIDD1_KAN626-12_4.tif:0011-0410	1.043	68.877	0	377	48.067	46.592	0.899	71.87	5579	1	1	1
254	PIDD1_KAN626-12_4.tif:0012-0510	1.765	84.606	0	542	134.258	57.89	0.943	149.318	11591	1.017	0.983	0.979
255	PIDD1_KAN626-12_4.tif:0013-0538	2.048	38.975	0	329	98.684	61.107	0.814	79.831	6197	1.518	0.659	0.911
256	PIDD1_KAN626-12_4.tif:0014-0539	1.043	58.691	0	292	49.656	61.233	0.899	61.242	4754	1	1	1
257	PIDD1_KAN626-12_4.tif:0015-0699	1.043	67.889	0	382	127.404	79.393	0.899	70.84	5499	1	1	1
258	PIDD1_KAN626-12_4.tif:0016-0737	1.481	73.643	0	511	124.68	83.706	0.935	109.1	8469	1.128	0.887	0.983
259	PIDD1_KAN626-12_4.tif:0017-0753	1.043	75.852	0	346	131.036	85.522	0.899	79.149	6144	1	1	1
260	PIDD1_KAN626-12_4.tif:0018-0856	1.043	52.926	0	431	84.614	97.213	0.899	55.226	4287	1	1	1
261	PIDD1_KAN626-12_4.tif:0019-0864	1.391	79.88	0	300	96.248	98.121	0.916	111.135	8627	1.112	0.9	0.991
262	PIDD1_KAN626-12_4.tif:0020-1030	1.881	74.027	0	486	82.252	116.931	0.871	139.231	10808	1.139	0.878	0.967
263	PIDD1_KAN626-12_4.tif:0021-1045	1.919	72.215	0	586	116.608	118.617	0.879	138.613	10760	1.397	0.716	0.955
264	PIDD1_KAN626-12_4.tif:0022-1152	1.391	65.926	0	321	14.292	130.799	0.889	91.722	7120	1.114	0.898	0.991
265	PIDD1_KAN626-12_4.tif:0023-1198	1.52	65.271	0	342	50.796	136.035	0.931	99.219	7702	1.022	0.979	0.987
266	PIDD1_KAN626-12_5.tif:0001-0063	2.023	150.975	0	1513	35.348	7.229	0.927	305.348	23703	1.115	0.897	0.975
267	PIDD1_KAN626-12_5.tif:0002-0065	1.894	88.884	0	490	102.997	7.373	0.948	168.32	13066	1.098	0.911	0.977
268	PIDD1_KAN626-12_5.tif:0003-0103	1.043	46.457	0	385	133.306	11.747	0.899	48.476	3763	1	1	1
269	PIDD1_KAN626-12_5.tif:0004-0117	1.778	100.435	0	669	85.465	13.256	0.9	178.548	13860	1.008	0.992	0.982
270	PIDD1_KAN626-12_5.tif:0005-0229	1.043	51.765	0	395	126.95	26.048	0.899	54.015	4193	1	1	1
271	PIDD1_KAN626-12_5.tif:0006-0304	1.507	90.521	0	711	136.187	34.491	0.872	136.436	10591	1.221	0.819	0.987
272	PIDD1_KAN626-12_5.tif:0007-0373	1.636	82.74	0	358	64.132	42.388	0.909	135.367	10508	1.114	0.898	0.981
273	PIDD1_KAN626-12_5.tif:0008-0404	1.971	62.948	0	562	93.294	45.883	0.85	124.069	9631	1.48	0.676	0.942
274	PIDD1_KAN626-12_5.tif:0009-0415	1.507	88.188	0	539	13.336	47.159	0.951	132.919	10318	1	1	0.983
275	PIDD1_KAN626-12_5.tif:0010-0515	1.043	56.333	0	471	139.548	58.509	0.899	58.782	4563	1	1	1
276	PIDD1_KAN626-12_5.tif:0011-0571	1.043	85	0	678	55.558	64.865	0.899	88.694	6885	1	1	1
277	PIDD1_KAN626-12_5.tif:0012-0594	1.262	67.592	0	296	132.455	67.419	0.925	85.332	6624	1.052	0.95	0.99
278	PIDD1_KAN626-12_5.tif:0013-0610	1.52	113.059	0	1180	104.49	69.305	0.905	171.862	13341	1.06	0.944	0.992
279	PIDD1_KAN626-12_5.tif:0014-0655	1.829	55.056	0	329	109.213	74.347	0.838	100.713	7818	1.444	0.692	0.934
280	PIDD1_KAN626-12_5.tif:0015-0731	1.391	77.824	0	307	103.853	83.025	0.916	108.275	8405	1.112	0.9	0.991
281	PIDD1_KAN626-12_5.tif:0016-0767	1.958	96.559	0	576	24.289	87.119	0.907	189.073	14677	1.092	0.916	0.987
282	PIDD1_KAN626-12_5.tif:0017-0932	1.159	104.911	0	1002	128.596	105.839	0.89	121.634	9442	1.111	0.9	1
283	PIDD1_KAN626-12_5.tif:0018-0951	1.159	82.6	0	292	66.568	107.939	0.89	95.767	7434	1.111	0.9	1
284	PIDD1_KAN626-12_5.tif:0019-0969	0.915	22.648	0	83	17.371	110.032	0.924	20.715	1608	1.13	0.885	0.993
285	PIDD1_KAN626-12_5.tif:0020-1066	1.494	73.276	0	293	142.504	121.044	0.943	109.499	8500	1.105	0.905	0.983
286	PIDD1_KAN626-12_5.tif:0021-1095	1.262	75.5	0	234	49.146	124.283	0.925	95.316	7399	1.052	0.95	0.99
										8700.3
287	PIDD1_KAN626-13_1.tif:0001-0129	2.035	110.329	0	879	89.008	14.624	0.887	224.563	17432	1.212	0.825	0.978
288	PIDD1_KAN626-13_1.tif:0002-0224	2.01	71.628	0	693	132.268	25.431	0.745	143.946	11174	1.532	0.653	0.889
289	PIDD1_KAN626-13_1.tif:0003-0300	2.061	60.869	0	540	36.391	34.119	0.838	125.46	9739	1.448	0.691	0.914
290	PIDD1_KAN626-13_1.tif:0004-0486	1.675	108.869	0	727	102.547	55.171	0.905	182.323	14153	1.09	0.917	0.992
291	PIDD1_KAN626-13_1.tif:0005-0581	1.275	81.394	0	442	47.613	66	0.877	103.805	8058	1.222	0.818	1
292	PIDD1_KAN626-13_1.tif:0006-0716	1.675	79.892	0	429	3.348	81.256	0.905	133.795	10386	1.09	0.917	0.992
293	PIDD1_KAN626-13_1.tif:0007-0751	2.705	89.252	0	909	113.759	85.264	0.83	241.452	18743	1.448	0.69	0.927
294	PIDD1_KAN626-13_1.tif:0008-0813	1.301	25.871	0	116	108.674	92.261	0.941	33.661	2613	1.195	0.837	0.967
295	PIDD1_KAN626-13_1.tif:0009-0922	3.079	81.757	0	684	76.548	104.666	0.824	251.719	19540	1.56	0.641	0.932
296	PIDD1_KAN626-13_1.tif:0010-1010	1.262	85.755	0	591	42.336	114.635	0.925	108.262	8404	1.052	0.95	0.99
297	PIDD1_KAN626-13_1.tif:0011-1015	2.01	91.942	0	693	73.101	115.285	0.846	184.77	14343	1.34	0.746	0.934
298	PIDD1_KAN626-13_1.tif:0012-1078	1.404	77.89	0	265	72.522	122.415	0.897	109.37	8490	1.103	0.907	0.995
299	PIDD1_KAN626-13_1.tif:0013-1125	1.147	7.393	0	45	137.964	127.682	0.909	8.477	658	1.115	0.897	0.994
300	PIDD1_KAN626-13_1.tif:0014-1142	1.868	72.931	0	601	66.583	129.683	0.901	136.23	10575	1.318	0.759	0.942
301	PIDD1_KAN626-13_1.tif:0015-1168	1.043	75.741	0	388	24.686	132.625	0.899	79.033	6135	1	1	1
302	PIDD1_KAN626-13_2.tif:0001-0098	2.254	83.869	0	907	21.798	11.09	0.75	189.073	14677	1.515	0.66	0.877
303	PIDD1_KAN626-13_2.tif:0002-0164	1.919	131.322	0	931	98.863	18.667	0.889	252.067	19567	1.283	0.78	0.987
304	PIDD1_KAN626-13_2.tif:0003-0164	1.507	86.248	0	426	114.456	18.662	0.924	129.995	10091	1.084	0.923	0.987
305	PIDD1_KAN626-13_2.tif:0004-0175	1.791	95.928	0	481	40.053	19.859	0.931	171.772	13334	1.052	0.951	0.986
306	PIDD1_KAN626-13_2.tif:0005-0298	1.675	91.154	0	467	104.023	33.823	0.905	152.655	11850	1.1	0.909	0.992
307	PIDD1_KAN626-13_2.tif:0006-0312	1.417	72.464	0	283	67.76	35.469	0.879	102.684	7971	1.1	0.909	1
308	PIDD1_KAN626-13_2.tif:0007-0341	1.34	84.808	0	460	39.931	38.769	0.91	113.621	8820	1.347	0.742	0.981
309	PIDD1_KAN626-13_2.tif:0008-0438	1.507	81.658	0	405	136.597	49.752	0.897	123.077	9554	1.007	0.993	0.983
310	PIDD1_KAN626-13_2.tif:0009-0484	1.623	81.19	0	548	46.77	55.01	0.877	131.785	10230	1.311	0.763	0.984
311	PIDD1_KAN626-13_2.tif:0010-0549	1.636	79.031	0	413	2.098	62.326	0.935	129.299	10037	1.095	0.914	0.981
312	PIDD1_KAN626-13_2.tif:0011-0559	1.649	99.641	0	618	65.084	63.438	0.916	164.3	12754	1.121	0.892	0.988
313	PIDD1_KAN626-13_2.tif:0012-0669	1.842	63.497	0	384	71.676	76.021	0.823	116.971	9080	1.325	0.755	0.917
314	PIDD1_KAN626-13_2.tif:0013-0714	1.997	94.303	0	780	53.214	81.029	0.939	188.3	14617	1.191	0.84	0.969
315	PIDD1_KAN626-13_2.tif:0014-0735	1.778	81.63	0	464	96.483	83.431	0.95	145.119	11265	1.033	0.968	0.982
316	PIDD1_KAN626-13_2.tif:0015-0751	1.868	91.09	0	715	133.913	85.33	0.911	170.149	13208	1.136	0.881	0.97
317	PIDD1_KAN626-13_2.tif:0016-0760	1.288	73.83	0	322	2.838	86.26	0.886	95.11	7383	1	1	1
318	PIDD1_KAN626-13_2.tif:0017-0823	1.121	38.425	0	72	119.851	93.472	0.951	43.065	3343	1.146	0.872	0.983
319	PIDD1_KAN626-13_2.tif:0018-0862	1.881	60.685	0	334	19.578	97.877	0.862	114.137	8860	1.338	0.748	0.948
320	PIDD1_KAN626-13_2.tif:0019-0867	2.164	79.839	0	763	36.94	98.35	0.82	172.79	13413	1.402	0.713	0.936
321	PIDD1_KAN626-13_2.tif:0020-0883	1.662	94.76	0	490	136.205	100.282	0.923	157.473	12224	1.093	0.915	0.989
322	PIDD1_KAN626-13_2.tif:0021-0888	2.1	88.086	0	688	100.143	100.848	0.863	184.963	14358	1.476	0.677	0.967
323	PIDD1_KAN626-13_2.tif:0022-0913	1.507	88.41	0	415	3.453	103.674	0.924	133.254	10344	1.084	0.923	0.987
324	PIDD1_KAN626-13_2.tif:0023-1037	1.288	85.13	0	315	55.956	117.7	0.886	109.667	8513	1	1	1
325	PIDD1_KAN626-13_2.tif:0024-1180	1.378	74.766	0	323	89.045	133.935	0.908	103.058	8000	1.127	0.887	0.986
326	PIDD1_KAN626-13_2.tif:0025-1189	1.275	77.889	0	351	65.495	134.946	0.905	99.335	7711	1.025	0.975	0.995
327	PIDD1_KAN626-13_2.tif:0026-1229	1.275	86.869	0	498	8.394	139.497	0.905	110.787	8600	1.025	0.975	0.995
328	PIDD1_KAN626-13_3.tif:0001-0014	2.242	49.753	0	466	14.144	1.573	0.694	111.522	8657	1.756	0.57	0.845
329	PIDD1_KAN626-13_3.tif:0002-0077	2.19	76.053	0	715	59.338	8.706	0.858	166.555	12929	1.305	0.766	0.983
330	PIDD1_KAN626-13_3.tif:0003-0149	2.396	64.935	0	553	135.774	16.945	0.841	155.592	12078	1.679	0.595	0.974
331	PIDD1_KAN626-13_3.tif:0004-0231	1.945	51.954	0	263	128.274	26.199	0.762	101.061	7845	1.795	0.557	0.944
332	PIDD1_KAN626-13_3.tif:0005-0277	1.804	107.593	0	616	117.254	31.431	0.913	194.045	15063	1.071	0.934	0.989
333	PIDD1_KAN626-13_3.tif:0006-0427	2.512	97.108	0	927	83.77	48.442	0.893	243.938	18936	1.264	0.791	0.944
334	PIDD1_KAN626-13_3.tif:0007-0433	2.087	83.333	0	746	49.199	49.153	0.9	173.91	13500	1.396	0.716	0.967
335	PIDD1_KAN626-13_3.tif:0008-0700	1.211	16.404	0	75	73.765	79.46	0.979	19.864	1542	1.046	0.956	0.974
336	PIDD1_KAN626-13_3.tif:0009-0702	2.641	73.2	0	486	14.519	79.681	0.853	193.311	15006	1.644	0.608	0.958
337	PIDD1_KAN626-13_3.tif:0010-0729	2.151	78.862	0	689	101.121	82.757	0.827	169.659	13170	1.456	0.687	0.91
338	PIDD1_KAN626-13_3.tif:0011-0800	1.404	88.642	0	593	7.836	90.852	0.897	124.468	9662	1.103	0.907	0.995
339	PIDD1_KAN626-13_3.tif:0012-0876	1.494	13.534	0	156	75.302	99.471	0.916	20.225	1570	1.057	0.946	0.979
340	PIDD1_KAN626-13_3.tif:0013-0911	2.28	62.734	0	613	135.654	103.364	0.685	143.045	11104	1.72	0.582	0.825
341	PIDD1_KAN626-13_3.tif:0014-0969	2.242	44	0	411	28.218	109.965	0.694	98.627	7656	1.756	0.57	0.845
342	PIDD1_KAN626-13_3.tif:0015-0998	2.035	44.804	0	384	132.891	113.348	0.663	91.193	7079	2.291	0.436	0.861
343	PIDD1_KAN626-13_3.tif:0016-1106	0.915	10.789	0	63	122.857	125.537	0.924	9.868	766	1.13	0.885	0.993
344	PIDD1_KAN626-13_3.tif:0017-1154	1.765	115.599	0	784	74.145	130.997	0.893	204.016	15837	1.075	0.931	0.975
345	PIDD1_KAN626-13_3.tif:0018-1155	0.799	36.661	0	309	125.304	131.093	0.96	29.281	2273	1.081	0.925	0.984
346	PIDD1_KAN626-13_3.tif:0019-1173	2.254	81.72	0	710	102.289	133.118	0.827	184.229	14301	1.481	0.675	0.933
347	PIDD1_KAN626-13_3.tif:0020-1238	1.688	74.107	0	386	60.739	140.505	0.902	125.061	9708	1.146	0.872	0.956
348	PIDD1_KAN626-13_4.tif:0001-0108	2.113	118.963	0	981	47.28	12.252	0.911	251.333	19510	1.137	0.88	0.959
349	PIDD1_KAN626-13_4.tif:0002-0169	1.688	66.679	0	413	80.44	19.152	0.854	112.526	8735	1.439	0.695	0.967
350	PIDD1_KAN626-13_4.tif:0003-0174	2.229	79.052	0	822	111.614	19.714	0.8	176.178	13676	1.414	0.707	0.908
351	PIDD1_KAN626-13_4.tif:0004-0383	2.641	104.741	0	1008	57.809	43.479	0.871	276.608	21472	1.403	0.713	0.949
352	PIDD1_KAN626-13_4.tif:0005-0391	2.396	101.355	0	978	104.948	44.335	0.9	242.856	18852	1.271	0.787	0.954
353	PIDD1_KAN626-13_4.tif:0006-0547	1.546	104.575	0	564	48.805	62.085	0.869	161.659	12549	1.2	0.833	1
354	PIDD1_KAN626-13_4.tif:0007-0676	1.159	79.3	0	390	56.637	76.783	0.89	91.941	7137	1.111	0.9	1
355	PIDD1_KAN626-13_4.tif:0008-0747	1.791	92.266	0	455	133.837	84.781	0.906	165.215	12825	1.016	0.984	0.986
356	PIDD1_KAN626-13_4.tif:0009-0995	2.216	62.93	0	503	102.332	112.978	0.923	139.437	10824	1.255	0.797	0.956
357	PIDD1_KAN626-13_4.tif:0010-0998	1.804	105.357	0	678	65.49	113.273	0.938	190.013	14750	1	1	0.986
358	PIDD1_KAN626-13_4.tif:0011-1028	1.675	70.146	0	280	141.024	116.688	0.905	117.473	9119	1.09	0.917	0.992
359	PIDD1_KAN626-13_4.tif:0012-1117	1.378	79.43	0	560	37.573	126.832	0.908	109.486	8499	1.127	0.887	0.986
360	PIDD1_KAN626-13_4.tif:0013-1237	1.391	90.324	0	526	83.65	140.456	0.916	125.666	9755	1.112	0.9	0.991
										10900.4
361	PIDD1_KAN626-14_1.tif:0001-0072	1.585	72.366	0	421	129.903	8.253	0.824	114.665	8901	1.392	0.718	0.925
362	PIDD1_KAN626-14_1.tif:0002-0095	1.224	60.789	0	302	9.002	10.856	0.897	74.395	5775	1.241	0.806	0.979
363	PIDD1_KAN626-14_1.tif:0003-0180	0.915	27.887	0	97	106.117	20.493	0.924	25.507	1980	1.13	0.885	0.993
364	PIDD1_KAN626-14_1.tif:0004-0188	1.52	92.466	0	572	133.206	21.408	0.905	140.558	10911	1.06	0.944	0.992
365	PIDD1_KAN626-14_1.tif:0005-0230	0.631	76.224	0	154	100.277	26.162	0.935	48.115	3735	1	1	1
366	PIDD1_KAN626-14_1.tif:0006-0344	2.448	76.411	0	683	12.194	39.027	0.774	187.025	14518	1.436	0.696	0.886
367	PIDD1_KAN626-14_1.tif:0007-0356	1.932	128.34	0	914	48.751	40.422	0.918	247.996	19251	1.094	0.914	0.98
368	PIDD1_KAN626-14_1.tif:0008-0417	2.074	72.18	0	706	25.871	47.345	0.852	149.705	11621	1.299	0.77	0.947
369	PIDD1_KAN626-14_1.tif:0009-0445	2.499	63.789	0	396	100.542	50.571	0.869	159.418	12375	1.111	0.9	0.93
370	PIDD1_KAN626-14_1.tif:0010-0508	2.048	86.491	0	710	63.989	57.685	0.883	177.157	13752	1.339	0.747	0.952
371	PIDD1_KAN626-14_1.tif:0011-0530	2.396	78.887	0	528	114.236	60.15	0.921	189.021	14673	1.248	0.801	0.959
372	PIDD1_KAN626-14_1.tif:0012-0558	1.275	86.505	0	203	107.263	63.338	0.905	110.324	8564	1.025	0.975	0.995
373	PIDD1_KAN626-14_1.tif:0013-0609	1.675	60.531	0	239	36.774	69.09	0.848	101.37	7869	1.449	0.69	0.963
374	PIDD1_KAN626-14_1.tif:0014-0630	1.005	17.128	0	83	112.756	71.568	0.963	17.211	1336	1.032	0.969	0.981
375	PIDD1_KAN626-14_1.tif:0015-0731	1.881	98.158	0	770	78.827	82.992	0.967	184.616	14331	1.089	0.918	0.97
376	PIDD1_KAN626-14_1.tif:0016-0744	1.726	87.463	0	555	126.25	84.52	0.898	150.98	11720	1.246	0.803	0.978
377	PIDD1_KAN626-14_1.tif:0017-0866	2.576	85.47	0	942	43.157	98.262	0.876	220.209	17094	1.523	0.657	0.971
378	PIDD1_KAN626-14_1.tif:0018-0959	1.907	103.372	0	806	136.364	108.87	0.93	197.086	15299	1.107	0.903	0.977
379	PIDD1_KAN626-14_1.tif:0019-0970	1.907	98.466	0	853	97.006	110.127	0.811	187.733	14573	1.215	0.823	0.937
380	PIDD1_KAN626-14_1.tif:0020-1080	1.829	89.641	0	800	125.512	122.659	0.892	163.978	12729	1.231	0.812	0.963
381	PIDD1_KAN626-14_1.tif:0021-1112	1.378	93.411	0	447	62.866	126.284	0.908	128.758	9995	1.12	0.893	0.991
382	PIDD1_KAN626-14_1.tif:0022-1179	1.855	96.632	0	627	91.364	133.872	0.881	179.257	13915	1.178	0.849	0.963
383	PIDD1_KAN626-14_2.tif:0001-0105	1.662	98.752	0	618	42.567	11.97	0.923	164.107	12739	1.093	0.915	0.989
384	PIDD1_KAN626-14_2.tif:0002-0202	1.765	100.343	0	560	81.488	22.924	0.918	177.092	13747	1.124	0.89	0.982
385	PIDD1_KAN626-14_2.tif:0003-0254	1.159	71.667	0	404	103.001	28.829	0.89	83.091	6450	1.111	0.9	1
386	PIDD1_KAN626-14_2.tif:0004-0260	2.473	105.219	0	1330	14.43	29.515	0.667	260.247	20202	1.701	0.588	0.828
387	PIDD1_KAN626-14_2.tif:0005-0284	1.52	94.144	0	506	128.998	32.286	0.931	143.109	11109	1.022	0.979	0.987
388	PIDD1_KAN626-14_2.tif:0006-0581	1.842	100.86	0	585	106.572	65.939	0.885	185.801	14423	1.018	0.982	0.997
389	PIDD1_KAN626-14_2.tif:0007-0646	1.533	108.311	0	706	128.548	73.386	0.887	166.039	12889	1.04	0.962	0.992
390	PIDD1_KAN626-14_2.tif:0008-0660	1.275	72	0	410	39.049	74.905	0.905	91.825	7128	1.025	0.975	0.995
391	PIDD1_KAN626-14_2.tif:0009-0754	1.932	112.593	0	707	79.579	85.62	0.918	217.568	16889	1.092	0.916	0.984
392	PIDD1_KAN626-14_2.tif:0010-0768	1.043	84.333	0	232	49.316	87.225	0.899	87.999	6831	1	1	1
393	PIDD1_KAN626-14_2.tif:0011-0779	1.855	72.972	0	449	107.632	88.449	0.859	135.367	10508	1.312	0.762	0.966
394	PIDD1_KAN626-14_2.tif:0012-0816	0.721	44.696	0	230	72.867	92.673	0.92	32.244	2503	1.143	0.875	1
395	PIDD1_KAN626-14_2.tif:0013-1036	1.404	95.358	0	638	79.899	117.648	0.897	133.898	10394	1.103	0.907	0.995
396	PIDD1_KAN626-14_2.tif:0014-1097	1.043	88.025	0	268	97.553	124.566	0.899	91.85	7130	1	1	1
397	PIDD1_KAN626-14_2.tif:0015-1154	1.52	124.127	0	848	85.239	130.979	0.905	188.686	14647	1.205	0.83	0.992
398	PIDD1_KAN626-14_2.tif:0016-1226	1.043	85.321	0	182	36.944	139.208	0.899	89.029	6911	1	1	1
399	PIDD1_KAN626-14_2.tif:0017-1246	1.159	90.789	0	366	59.077	141.421	0.89	105.261	8171	1.111	0.9	1
400	PIDD1_KAN626-14_3.tif:0001-0040	1.378	72.271	0	417	45.282	4.601	0.908	99.618	7733	1.127	0.887	0.986
401	PIDD1_KAN626-14_3.tif:0002-0047	2.448	81.742	0	824	27.652	5.404	0.78	200.074	15531	1.637	0.611	0.943
402	PIDD1_KAN626-14_3.tif:0003-0129	1.649	81.062	0	373	112.414	14.642	0.916	133.666	10376	1.095	0.913	0.985
403	PIDD1_KAN626-14_3.tif:0004-0274	1.662	94.194	0	587	13.114	31.104	0.923	156.532	12151	1.093	0.915	0.989
404	PIDD1_KAN626-14_3.tif:0005-0339	1.816	132.908	0	1163	111.688	38.472	0.895	241.413	18740	1.054	0.949	0.989
405	PIDD1_KAN626-14_3.tif:0006-0345	1.649	98.836	0	567	88.368	39.166	0.916	162.973	12651	1.121	0.892	0.988
406	PIDD1_KAN626-14_3.tif:0007-0351	0.721	13.946	0	52	130.128	39.839	0.92	10.061	781	1.143	0.875	1
407	PIDD1_KAN626-14_3.tif:0008-0358	1.765	117.474	0	876	55.383	40.628	0.943	207.327	16094	1.088	0.919	0.982
408	PIDD1_KAN626-14_3.tif:0009-0478	1.636	96.638	0	710	25.153	54.249	0.935	158.104	12273	1.108	0.903	0.984
409	PIDD1_KAN626-14_3.tif:0010-0619	1.404	94.835	0	548	94.2	70.318	0.897	133.164	10337	1.103	0.907	0.995
410	PIDD1_KAN626-14_3.tif:0011-0708	1.765	94.423	0	608	9.023	80.422	0.918	166.645	12936	1.199	0.834	0.982
411	PIDD1_KAN626-14_3.tif:0012-0719	1.649	97.109	0	623	116.735	81.615	0.916	160.126	12430	1.102	0.908	0.985
412	PIDD1_KAN626-14_3.tif:0013-0729	0.812	32.984	0	91	48.244	82.735	0.937	26.769	2078	1.039	0.963	0.992
413	PIDD1_KAN626-14_3.tif:0014-0734	1.997	60.052	0	376	75.943	83.312	0.892	119.908	9308	1.227	0.815	0.963
414	PIDD1_KAN626-14_3.tif:0015-0742	1.391	85.056	0	421	127.461	84.274	0.916	118.336	9186	1.112	0.9	0.991
415	PIDD1_KAN626-14_3.tif:0016-1140	1.945	56.464	0	422	59.236	129.487	0.839	109.834	8526	1.424	0.702	0.926
416	PIDD1_KAN626-14_3.tif:0017-1186	1.159	75	0	422	30.532	134.668	0.89	86.955	6750	1.111	0.9	1
417	PIDD1_KAN626-14_3.tif:0018-1274	0.889	82.783	0	457	49.479	144.661	0.898	73.583	5712	1.429	0.7	0.993
418	PIDD1_KAN626-14_4.tif:0001-0005	0.902	19.9	0	166	114.635	0.624	0.878	17.945	1393	1.429	0.7	1
419	PIDD1_KAN626-14_4.tif:0002-0050	0.824	35.953	0	176	65.263	5.675	0.914	29.642	2301	1	1	1
420	PIDD1_KAN626-14_4.tif:0003-0126	1.919	63.839	0	422	119.813	14.251	0.879	122.536	9512	1.268	0.789	0.952
421	PIDD1_KAN626-14_4.tif:0004-0250	2.023	68.408	0	252	133.437	28.377	0.872	138.355	10740	1.422	0.703	0.94
422	PIDD1_KAN626-14_4.tif:0005-0278	2.319	64.928	0	512	37.647	31.545	0.934	150.555	11687	1.352	0.74	0.963
423	PIDD1_KAN626-14_4.tif:0006-0300	1.043	88.025	0	809	14.471	34.107	0.899	91.85	7130	1	1	1
424	PIDD1_KAN626-14_4.tif:0007-0342	1.675	124.385	0	1040	98.802	38.807	0.905	208.306	16170	1.09	0.917	0.992
425	PIDD1_KAN626-14_4.tif:0008-0401	2.435	74.058	0	640	9.969	45.481	0.874	180.313	13997	1.464	0.683	0.969
426	PIDD1_KAN626-14_4.tif:0009-0449	2.705	83.429	0	891	108.516	51.006	0.79	225.697	17520	1.591	0.629	0.903
427	PIDD1_KAN626-14_4.tif:0010-0525	1.829	68.739	0	493	16.546	59.639	0.916	125.744	9761	1.16	0.862	0.959
428	PIDD1_KAN626-14_4.tif:0011-0544	2.1	69.086	0	506	55.39	61.805	0.842	145.067	11261	1.561	0.641	0.964
429	PIDD1_KAN626-14_4.tif:0012-0701	0.915	44.958	0	136	98.468	79.558	0.924	41.12	3192	1.13	0.885	0.993
430	PIDD1_KAN626-14_4.tif:0013-0793	0.721	45.964	0	251	49.77	90.006	0.92	33.159	2574	1.143	0.875	1
431	PIDD1_KAN626-14_4.tif:0014-0807	1.404	97.092	0	518	0.79	91.646	0.897	136.333	10583	1.103	0.907	0.995
432	PIDD1_KAN626-14_4.tif:0015-0823	2.1	60.344	0	346	123.438	93.459	0.796	126.71	9836	1.474	0.678	0.916
433	PIDD1_KAN626-14_4.tif:0016-0853	2.113	104.305	0	818	79.211	96.842	0.934	220.364	17106	1.259	0.794	0.968
434	PIDD1_KAN626-14_4.tif:0017-0928	1.353	54.99	0	233	11.913	105.388	0.891	74.382	5774	1.165	0.858	0.977
435	PIDD1_KAN626-14_4.tif:0018-1001	1.404	97.991	0	519	42.397	113.618	0.897	137.595	10681	1.103	0.907	0.995
436	PIDD1_KAN626-14_4.tif:0019-1050	1.932	81.18	0	747	109.95	119.218	0.932	156.867	12177	1.25	0.8	0.965
437	PIDD1_KAN626-14_4.tif:0020-1097	2.01	70.699	0	522	12.899	124.474	0.78	142.078	11029	1.561	0.641	0.907
438	PIDD1_KAN626-14_4.tif:0021-1184	2.048	73.679	0	719	70.425	134.379	0.682	150.916	11715	1.616	0.619	0.832
439	PIDD1_KAN626-14_4.tif:0022-1194	1.546	98.25	0	486	1.196	135.58	0.894	151.882	11790	1.021	0.979	0.996
440	PIDD1_KAN626-14_4.tif:0023-1195	1.507	75.205	0	592	40.227	135.698	0.924	113.351	8799	1.084	0.923	0.987
										10703.9
441	PIDD1_KAN626-15_1.tif:0001-0037	1.533	69.025	0	325	130.591	4.256	0.912	105.815	8214	1	1	0.992
442	PIDD1_KAN626-15_1.tif:0002-0072	1.262	82.796	0	560	132.455	8.172	0.925	104.527	8114	1.052	0.95	0.99
443	PIDD1_KAN626-15_1.tif:0003-0153	1.507	75.393	0	275	82.23	17.421	0.897	113.634	8821	1.083	0.923	0.983
444	PIDD1_KAN626-15_1.tif:0004-0167	2.383	78.632	0	823	7.019	19.027	0.776	187.398	14547	1.622	0.616	0.93
445	PIDD1_KAN626-15_1.tif:0005-0223	1.159	69.156	0	262	16.401	25.311	0.89	80.179	6224	1.111	0.9	1
446	PIDD1_KAN626-15_1.tif:0006-0307	2.177	72.509	0	366	112.23	34.871	0.894	157.859	12254	1.29	0.775	0.985
447	PIDD1_KAN626-15_1.tif:0007-0336	1.52	71.288	0	540	1.973	38.198	0.931	108.366	8412	1.018	0.982	0.987
448	PIDD1_KAN626-15_1.tif:0008-0433	2.087	64.278	0	298	58.07	49.157	0.9	134.143	10413	1.334	0.75	0.953
449	PIDD1_KAN626-15_1.tif:0009-0449	2.216	67.419	0	629	133.806	50.981	0.901	149.383	11596	1.28	0.781	0.958
450	PIDD1_KAN626-15_1.tif:0010-0464	1.275	89.535	0	200	70.767	52.721	0.877	114.188	8864	1.222	0.818	1
451	PIDD1_KAN626-15_1.tif:0011-0604	2.267	78.682	0	785	99.309	68.546	0.702	178.393	13848	1.713	0.584	0.854
452	PIDD1_KAN626-15_1.tif:0012-0660	1.675	64.923	0	252	7.681	74.972	0.871	108.726	8440	1.295	0.772	0.963
453	PIDD1_KAN626-15_1.tif:0013-0766	2.461	73.042	0	607	106.322	86.897	0.915	179.72	13951	1.292	0.774	0.946
454	PIDD1_KAN626-15_1.tif:0014-0836	2.061	86.219	0	708	75.436	94.892	0.911	177.711	13795	1.368	0.731	0.955
455	PIDD1_KAN626-15_1.tif:0015-0839	1.739	71.333	0	382	18.103	95.265	0.955	124.056	9630	1.177	0.85	0.978
456	PIDD1_KAN626-15_1.tif:0016-0893	0.631	39.02	0	135	142.613	101.412	0.935	24.631	1912	1	1	1
457	PIDD1_KAN626-15_1.tif:0017-1001	1.675	75.846	0	400	63.116	113.67	0.905	127.019	9860	1.163	0.86	0.992
458	PIDD1_KAN626-15_1.tif:0018-1136	1.971	55.765	0	335	28.001	128.963	0.81	109.911	8532	1.519	0.658	0.936
459	PIDD1_KAN626-15_1.tif:0019-1146	1.275	85.333	0	567	104.766	130.076	0.905	108.829	8448	1.025	0.975	0.995
460	PIDD1_KAN626-15_2.tif:0001-0040	1.378	66.888	0	267	93.131	4.526	0.908	92.198	7157	1.107	0.903	0.986
461	PIDD1_KAN626-15_2.tif:0002-0048	0.824	23.234	0	122	41.201	5.448	0.914	19.156	1487	1	1	1
462	PIDD1_KAN626-15_2.tif:0003-0128	1.778	60.514	0	435	91.448	14.544	0.845	107.58	8351	1.549	0.646	0.958
463	PIDD1_KAN626-15_2.tif:0004-0155	1.649	74.547	0	426	112.252	17.649	0.942	122.922	9542	1.09	0.917	0.985
464	PIDD1_KAN626-15_2.tif:0005-0223	2.061	56.769	0	387	10.798	25.389	0.889	117.009	9083	1.192	0.839	0.944
465	PIDD1_KAN626-15_2.tif:0006-0266	1.997	92.568	0	742	6.12	30.224	0.915	184.835	14348	1.189	0.841	0.969
466	PIDD1_KAN626-15_2.tif:0007-0379	1.031	18.75	0	179	40.066	43.017	0.887	19.323	1500	1.25	0.8	1
467	PIDD1_KAN626-15_2.tif:0008-0387	1.275	81.212	0	271	4.545	43.93	0.905	103.573	8040	1.025	0.975	0.995
468	PIDD1_KAN626-15_2.tif:0009-0410	1.507	70.812	0	386	50.452	46.591	0.897	106.729	8285	1.083	0.923	0.983
469	PIDD1_KAN626-15_2.tif:0010-0596	1.25	39.959	0	126	117.818	67.641	0.946	49.932	3876	1.026	0.974	0.985
470	PIDD1_KAN626-15_2.tif:0011-0602	2.074	71.211	0	486	13.062	68.279	0.832	147.695	11465	1.303	0.767	0.944
471	PIDD1_KAN626-15_2.tif:0012-0616	1.353	63.324	0	310	62.658	69.971	0.919	85.654	6649	1.157	0.865	0.977
472	PIDD1_KAN626-15_2.tif:0013-0648	1.752	79.287	0	379	31.009	73.556	0.911	138.909	10783	1.066	0.938	0.975
473	PIDD1_KAN626-15_2.tif:0014-0740	1.159	61.5	0	267	25.651	84.047	0.89	71.303	5535	1.111	0.9	1
474	PIDD1_KAN626-15_2.tif:0015-0814	0.915	13.366	0	47	34.567	92.383	0.924	12.225	949	1.13	0.885	0.993
475	PIDD1_KAN626-15_2.tif:0016-0828	2.216	71.36	0	541	110.186	93.978	0.88	158.117	12274	1.251	0.799	0.948
476	PIDD1_KAN626-15_2.tif:0017-0934	1.842	57.308	0	365	67.968	106.038	0.823	105.57	8195	1.425	0.702	0.929
477	PIDD1_KAN626-15_2.tif:0018-1155	2.01	53.885	0	475	83.929	131.202	0.806	108.288	8406	1.592	0.628	0.945
478	PIDD1_KAN626-15_2.tif:0019-1207	1.52	70.847	0	315	134.725	136.995	0.905	107.696	8360	1.205	0.83	0.992
479	PIDD1_KAN626-15_3.tif:0001-0012	1.043	74.247	0	338	123.204	1.419	0.899	77.474	6014	1	1	1
480	PIDD1_KAN626-15_3.tif:0002-0094	1.031	25.962	0	98	61.806	10.72	0.919	26.756	2077	1.031	0.97	0.994
481	PIDD1_KAN626-15_3.tif:0003-0173	1.7	58.924	0	368	125.829	19.684	0.934	100.198	7778	1.273	0.785	0.971
482	PIDD1_KAN626-15_3.tif:0004-0185	1.404	99.239	0	691	98.466	21.002	0.897	139.347	10817	1.103	0.907	0.995
483	PIDD1_KAN626-15_3.tif:0005-0314	1.043	84.284	0	235	48.181	35.696	0.899	87.947	6827	1	1	1
484	PIDD1_KAN626-15_3.tif:0006-0358	1.275	67.051	0	307	75.256	40.628	0.905	85.512	6638	1.025	0.975	0.995
485	PIDD1_KAN626-15_3.tif:0007-0409	2.138	55.03	0	405	64.602	46.431	0.9	117.679	9135	1.166	0.857	0.965
486	PIDD1_KAN626-15_3.tif:0008-0440	0.902	21.957	0	79	100.731	49.951	0.947	19.8	1537	1.125	0.889	0.986
487	PIDD1_KAN626-15_3.tif:0009-0448	1.816	91.262	0	355	78.765	50.852	0.919	165.769	12868	1.019	0.982	0.989
488	PIDD1_KAN626-15_3.tif:0010-0550	1.443	50.143	0	248	12.863	62.506	0.859	72.347	5616	1.476	0.677	0.982
489	PIDD1_KAN626-15_3.tif:0011-0728	1.791	95.029	0	391	72.199	82.632	0.931	170.162	13209	1.052	0.951	0.986
490	PIDD1_KAN626-15_3.tif:0012-0872	1.159	72.633	0	344	115.94	98.972	0.89	84.211	6537	1.111	0.9	1
491	PIDD1_KAN626-15_3.tif:0013-0888	1.52	69.915	0	328	113.335	100.85	0.931	106.279	8250	1.022	0.979	0.987
492	PIDD1_KAN626-15_3.tif:0014-0890	1.404	87.422	0	272	33.364	101.077	0.897	122.755	9529	1.103	0.907	0.995
493	PIDD1_KAN626-15_3.tif:0015-0918	1.752	64	0	528	95.355	104.185	0.864	112.127	8704	1.411	0.709	0.986
494	PIDD1_KAN626-15_3.tif:0016-0953	1.842	97.049	0	331	80.036	108.127	0.853	178.78	13878	1.214	0.824	0.957
495	PIDD1_KAN626-15_3.tif:0017-1010	1.662	79.535	0	270	92.611	114.696	0.923	132.172	10260	1.093	0.915	0.989
496	PIDD1_KAN626-15_3.tif:0018-1184	1.043	68.074	0	200	18.444	134.441	0.899	71.033	5514	1	1	1
497	PIDD1_KAN626-15_3.tif:0019-1215	1.7	63.977	0	363	115.571	137.903	0.884	108.791	8445	1.411	0.709	0.974
498	PIDD1_KAN626-15_4.tif:0001-0200	0.631	51.082	0	394	22.984	22.757	0.935	32.244	2503	1	1	1
499	PIDD1_KAN626-15_4.tif:0002-0356	1.52	70.568	0	330	83.579	40.476	0.905	107.271	8327	1.06	0.944	0.992
500	PIDD1_KAN626-15_4.tif:0003-0504	1.791	116.784	0	711	117.8	57.217	0.931	209.118	16233	1.013	0.987	0.986
501	PIDD1_KAN626-15_4.tif:0004-0575	1.159	66.522	0	279	5.845	65.263	0.89	77.126	5987	1.111	0.9	1
502	PIDD1_KAN626-15_4.tif:0005-0815	1.765	76.956	0	275	47.202	92.516	0.918	135.818	10543	1.019	0.982	0.979
503	PIDD1_KAN626-15_4.tif:0006-0864	2.164	53.548	0	415	24.062	98.086	0.67	115.889	8996	1.798	0.556	0.834
504	PIDD1_KAN626-15_4.tif:0007-1003	0.631	31.245	0	64	15.379	113.897	0.935	19.723	1531	1	1	1
505	PIDD1_KAN626-15_4.tif:0008-1026	1.262	69.327	0	245	13.961	116.451	0.925	87.522	6794	1.052	0.95	0.99
506	PIDD1_KAN626-15_4.tif:0009-1042	1.572	68.139	0	286	102.335	118.248	0.826	107.09	8313	1.585	0.631	0.984
507	PIDD1_KAN626-15_4.tif:0010-1089	1.932	53.407	0	490	18.221	123.649	0.863	103.2	8011	1.439	0.695	0.955
508	PIDD1_KAN626-15_4.tif:0011-1156	1.391	66.491	0	358	116.054	131.206	0.916	92.507	7181	1.112	0.9	0.991
509	PIDD1_KAN626-15_4.tif:0012-1232	1.159	86	0	470	63.276	139.832	0.89	99.709	7740	1.111	0.9	1
										8347.13
510	PIDD1_KAN626-16_1.tif:0001-0220	1.391	77.824	0	446	67.249	24.97	0.916	108.275	8405	1.112	0.9	0.991
511	PIDD1_KAN626-16_1.tif:0002-0297	0.631	25.878	0	101	1.305	33.766	0.935	16.335	1268	1	1	1
512	PIDD1_KAN626-16_1.tif:0003-0326	2.048	105.566	0	843	20.295	37.087	0.893	216.229	16785	1.103	0.907	0.978
513	PIDD1_KAN626-16_1.tif:0004-0405	1.971	60.386	0	590	30.544	45.961	0.783	119.019	9239	1.508	0.663	0.884
514	PIDD1_KAN626-16_1.tif:0005-0497	2.1	96.632	0	794	75.836	56.441	0.884	202.908	15751	1.207	0.829	0.948
515	PIDD1_KAN626-16_1.tif:0006-0564	1.816	69.624	0	510	135.222	64.105	0.841	126.465	9817	1.35	0.741	0.956
516	PIDD1_KAN626-16_1.tif:0007-0649	1.031	26.4	0	204	4.364	73.713	0.919	27.207	2112	1.031	0.97	0.994
517	PIDD1_KAN626-16_1.tif:0008-0662	1.816	62.305	0	550	60.121	75.081	0.792	113.171	8785	1.368	0.731	0.913
518	PIDD1_KAN626-16_1.tif:0009-0874	1.971	77.438	0	626	125.269	99.182	0.951	152.629	11848	1.175	0.851	0.965
519	PIDD1_KAN626-16_1.tif:0010-0877	1.791	139.317	0	1017	86.588	99.527	0.931	249.465	19365	1.013	0.987	0.986
520	PIDD1_KAN626-16_1.tif:0011-0960	1.868	107.862	0	993	30.343	108.989	0.814	201.478	15640	1.349	0.741	0.927
521	PIDD1_KAN626-16_1.tif:0012-1004	1.224	37.316	0	201	128.156	113.967	0.926	45.668	3545	1.121	0.892	0.979
522	PIDD1_KAN626-16_1.tif:0013-1148	1.417	82.564	0	501	105.669	130.355	0.879	116.997	9082	1.1	0.909	1
523	PIDD1_KAN626-16_1.tif:0014-1172	1.636	82.913	0	488	27.398	133.018	0.935	135.65	10530	1.108	0.903	0.984
524	PIDD1_KAN626-16_2.tif:0001-0064	2.023	108.701	0	855	29.664	7.312	0.951	219.849	17066	1.03	0.971	0.969
525	PIDD1_KAN626-16_2.tif:0002-0120	1.043	28.086	0	143	140.343	13.677	0.899	29.307	2275	1	1	1
526	PIDD1_KAN626-16_2.tif:0003-0175	1.52	82.254	0	525	73.775	19.863	0.905	125.035	9706	1.205	0.83	0.992
527	PIDD1_KAN626-16_2.tif:0004-0237	2.023	93.822	0	576	13.22	26.948	0.927	189.756	14730	1.082	0.924	0.966
528	PIDD1_KAN626-16_2.tif:0005-0290	2.1	73.055	0	411	45.959	32.947	0.906	153.402	11908	1.279	0.782	0.962
529	PIDD1_KAN626-16_2.tif:0006-0304	1.778	77.949	0	512	105.088	34.56	0.89	138.574	10757	1.228	0.814	0.945
530	PIDD1_KAN626-16_2.tif:0007-0391	1.043	69.407	0	431	16.855	44.435	0.899	72.424	5622	1	1	1
531	PIDD1_KAN626-16_2.tif:0008-0437	1.507	76.359	0	412	83.593	49.656	0.897	115.09	8934	1.084	0.923	0.983
532	PIDD1_KAN626-16_2.tif:0009-0480	1.649	91.992	0	468	31.78	54.545	0.916	151.689	11775	1.095	0.913	0.985
533	PIDD1_KAN626-16_2.tif:0010-0618	2.087	73.216	0	625	23.23	70.199	0.849	152.796	11861	1.403	0.713	0.918
534	PIDD1_KAN626-16_2.tif:0011-0656	1.829	58.782	0	211	128.605	74.506	0.892	107.528	8347	1.311	0.763	0.963
535	PIDD1_KAN626-16_2.tif:0012-0665	1.507	112.855	0	865	57.723	75.526	0.924	170.097	13204	1.084	0.923	0.987
536	PIDD1_KAN626-16_2.tif:0013-0671	1.984	74.091	0	614	101.035	76.184	0.843	146.986	11410	1.419	0.705	0.966
537	PIDD1_KAN626-16_2.tif:0014-0957	1.649	47.945	0	295	142.502	108.585	0.661	79.058	6137	1.812	0.552	0.826
538	PIDD1_KAN626-16_2.tif:0015-1055	1.945	76.026	0	609	40.633	119.766	0.78	147.888	11480	1.42	0.704	0.912
539	PIDD1_KAN626-16_2.tif:0016-1082	1.868	69.738	0	505	121.456	122.825	0.856	130.265	10112	1.37	0.73	0.932
540	PIDD1_KAN626-16_3.tif:0001-0044	2.242	65.569	0	551	49.733	5.006	0.934	146.974	11409	1.142	0.875	0.956
541	PIDD1_KAN626-16_3.tif:0002-0092	1.842	109.538	0	894	1.893	10.445	0.973	201.788	15664	1.111	0.9	0.973
542	PIDD1_KAN626-16_3.tif:0003-0126	2.126	87.958	0	691	17.061	14.384	0.917	186.96	14513	1.251	0.799	0.965
543	PIDD1_KAN626-16_3.tif:0004-0245	1.417	95.645	0	492	112.649	27.808	0.879	135.534	10521	1.1	0.909	1
544	PIDD1_KAN626-16_3.tif:0005-0272	1.34	38.038	0	190	16.694	30.93	0.969	50.962	3956	1.131	0.884	0.977
545	PIDD1_KAN626-16_3.tif:0006-0291	1.958	56.974	0	279	92.073	33.105	0.875	111.56	8660	1.21	0.826	0.95
546	PIDD1_KAN626-16_3.tif:0007-0305	1.868	69.931	0	575	63.63	34.659	0.935	130.626	10140	1.093	0.915	0.976
547	PIDD1_KAN626-16_3.tif:0008-0385	1.932	65.64	0	451	133.686	43.692	0.885	126.839	9846	1.229	0.813	0.946
548	PIDD1_KAN626-16_3.tif:0009-0475	1.945	123	0	1125	72.694	53.92	0.891	239.262	18573	1.178	0.849	0.953
549	PIDD1_KAN626-16_3.tif:0010-0516	2.319	87.061	0	908	109.328	58.543	0.814	201.878	15671	1.349	0.741	0.93
550	PIDD1_KAN626-16_3.tif:0011-0533	1.971	89.895	0	715	23.72	60.503	0.926	177.182	13754	1.248	0.801	0.962
551	PIDD1_KAN626-16_3.tif:0012-0558	1.675	74.062	0	372	40.227	63.333	0.905	124.03	9628	1.091	0.917	0.992
552	PIDD1_KAN626-16_3.tif:0013-0819	2.267	76.909	0	653	37.563	92.946	0.859	174.374	13536	1.378	0.725	0.959
553	PIDD1_KAN626-16_3.tif:0014-0851	1.778	117.659	0	998	119.69	96.649	0.924	209.169	16237	1.185	0.844	0.982
554	PIDD1_KAN626-16_3.tif:0015-0876	1.778	78.362	0	545	6.649	99.41	0.845	139.309	10814	1.379	0.725	0.945
555	PIDD1_KAN626-16_3.tif:0016-0911	2.048	78.906	0	758	26.504	103.408	0.883	161.621	12546	1.181	0.847	0.935
556	PIDD1_KAN626-16_3.tif:0017-0981	2.164	76.22	0	460	78.839	111.407	0.88	164.957	12805	1.261	0.793	0.933
557	PIDD1_KAN626-16_3.tif:0018-1100	2.01	72.923	0	627	73.416	124.903	0.867	146.548	11376	1.293	0.773	0.931
558	PIDD1_KAN626-16_3.tif:0019-1159	1.713	69.594	0	569	46.825	131.627	0.891	119.238	9256	1.194	0.837	0.964
559	PIDD1_KAN626-16_3.tif:0020-1211	0.928	53.194	0	126	107.768	137.449	0.903	49.339	3830	1.125	0.889	1
560	PIDD1_KAN626-16_3.tif:0021-1260	0.631	45.245	0	106	128.652	143.067	0.935	28.56	2217	1	1	1
561	PIDD1_KAN626-16_4.tif:0001-0008	1.739	93.407	0	573	65.607	0.897	0.904	162.445	12610	1.114	0.898	0.971
562	PIDD1_KAN626-16_4.tif:0002-0036	1.52	82.822	0	427	84.453	4.086	0.905	125.898	9773	1.2	0.834	0.992
563	PIDD1_KAN626-16_4.tif:0003-0071	1.533	86.597	0	414	138.867	8.115	0.912	132.752	10305	1.044	0.958	0.992
564	PIDD1_KAN626-16_4.tif:0004-0133	1.688	62.557	0	222	105.889	15.082	0.927	105.57	8195	1.156	0.865	0.967
565	PIDD1_KAN626-16_4.tif:0005-0147	1.159	72.4	0	277	134.1	16.685	0.89	83.941	6516	1.111	0.9	1
566	PIDD1_KAN626-16_4.tif:0006-0180	1.61	60.856	0	367	143.734	20.441	0.92	97.995	7607	1.324	0.755	0.984
567	PIDD1_KAN626-16_4.tif:0007-0199	1.829	87.282	0	557	25.529	22.662	0.916	159.663	12394	1.159	0.863	0.956
568	PIDD1_KAN626-16_4.tif:0008-0243	1.675	101.277	0	693	45.797	27.571	0.905	169.608	13166	1.09	0.917	0.992
569	PIDD1_KAN626-16_4.tif:0009-0317	1.546	96.275	0	448	45.793	36.041	0.894	148.829	11553	1.021	0.979	0.996
570	PIDD1_KAN626-16_4.tif:0010-0403	1.765	83.891	0	536	107.41	45.788	0.893	148.056	11493	1.185	0.844	0.979
571	PIDD1_KAN626-16_4.tif:0011-0440	1.919	75.846	0	761	1.952	49.96	0.836	145.582	11301	1.321	0.757	0.94
572	PIDD1_KAN626-16_4.tif:0012-0515	2.177	81.13	0	701	134.339	58.521	0.845	176.629	13711	1.372	0.729	0.931
573	PIDD1_KAN626-16_4.tif:0013-0595	1.842	68.105	0	465	37.25	67.565	0.922	125.46	9739	1.284	0.779	0.969
574	PIDD1_KAN626-16_4.tif:0014-0603	2.048	135.302	0	1172	87.573	68.491	0.938	277.136	21513	1.15	0.869	0.981
575	PIDD1_KAN626-16_4.tif:0015-0781	1.713	49.113	0	267	36.906	88.613	0.867	84.147	6532	1.432	0.698	0.978
576	PIDD1_KAN626-16_4.tif:0016-0860	2.486	67.731	0	599	80.378	97.708	0.872	168.397	13072	1.257	0.796	0.965
577	PIDD1_KAN626-16_4.tif:0017-0896	1.275	85.242	0	381	0.965	101.753	0.877	108.713	8439	1.222	0.818	1
578	PIDD1_KAN626-16_4.tif:0018-1034	1.804	89.193	0	799	14.313	117.447	0.903	160.861	12487	1.103	0.907	0.956
579	PIDD1_KAN626-16_4.tif:0019-1059	0.812	21.841	0	131	95.17	120.253	0.9	17.726	1376	1.286	0.778	1
580	PIDD1_KAN626-16_4.tif:0020-1149	1.366	69.547	0	348	78.144	130.393	0.899	94.968	7372	1.1	0.909	0.981
581	PIDD1_KAN626-16_4.tif:0021-1270	1.043	51.111	0	220	26.956	144.202	0.899	53.333	4140	1	1	1
										10496.4

## Sheet: IF condition
Exp. number	Cell line	Gene induced	Culture condition, fixation condition	mouse IgG1-Alexa488	Rabbit-Alexa568	mouse IgG2b-Alexa647	Nuclear stain	Date	Replicate
KAN626-1	RPE-BFP-Cas9 pMCB306 (pool)		Serum starved for 24 hours. Fixed in 100% methanol at -20C for 5 minutes.	PIDD1, Enzo Life Sciences, ALX-804-837-C100, 1:500	Ninein, Abcam, ab52473, 1:1000	FGFR1OP, Abnova, H00011116-M01, 1:1000	DAPI	No.6
KAN626-2	RPE-BFP-Cas9 CEP164KO (pool)		Serum starved for 24 hours. Fixed in 100% methanol at -20C for 5 minutes.	PIDD1, Enzo Life Sciences, ALX-804-837-C100, 1:500	Ninein, Abcam, ab52473, 1:1000	FGFR1OP, Abnova, H00011116-M01, 1:1000	DAPI	No.6
KAN626-3	RPE-BFP-Cas9 CEP83 KO (pool)		Serum starved for 24 hours. Fixed in 100% methanol at -20C for 5 minutes.	PIDD1, Enzo Life Sciences, ALX-804-837-C100, 1:500	Ninein, Abcam, ab52473, 1:1000	FGFR1OP, Abnova, H00011116-M01, 1:1000	DAPI	No.6
KAN626-4	RPE-BFP-Cas9 SCLT1 KO (pool)		Serum starved for 24 hours. Fixed in 100% methanol at -20C for 5 minutes.	PIDD1, Enzo Life Sciences, ALX-804-837-C100, 1:500	Ninein, Abcam, ab52473, 1:1000	FGFR1OP, Abnova, H00011116-M01, 1:1000	DAPI	No.6
KAN626-5	RPE-BFP-Cas9 FBF1 KO (pool)		Serum starved for 24 hours. Fixed in 100% methanol at -20C for 5 minutes.	PIDD1, Enzo Life Sciences, ALX-804-837-C100, 1:500	Ninein, Abcam, ab52473, 1:1000	FGFR1OP, Abnova, H00011116-M01, 1:1000	DAPI	No.6
KAN626-6	RPE-BFP-Cas9 CEP89KO (pool)		Serum starved for 24 hours. Fixed in 100% methanol at -20C for 5 minutes.	PIDD1, Enzo Life Sciences, ALX-804-837-C100, 1:500	Ninein, Abcam, ab52473, 1:1000	FGFR1OP, Abnova, H00011116-M01, 1:1000	DAPI	No.6
KAN626-7	RPE-BFP-Cas9 CCDC92 KO (pool)		Serum starved for 24 hours. Fixed in 100% methanol at -20C for 5 minutes.	PIDD1, Enzo Life Sciences, ALX-804-837-C100, 1:500	Ninein, Abcam, ab52473, 1:1000	FGFR1OP, Abnova, H00011116-M01, 1:1000	DAPI	No.6
KAN626-8	RPE-BFP-Cas9 ANKRD26 KO (pool)		Serum starved for 24 hours. Fixed in 100% methanol at -20C for 5 minutes.	PIDD1, Enzo Life Sciences, ALX-804-837-C100, 1:500	Ninein, Abcam, ab52473, 1:1000	FGFR1OP, Abnova, H00011116-M01, 1:1000	DAPI	No.6
KAN626-9	RPE-BFP-Cas9 TTBK2 KO (pool)		Serum starved for 24 hours. Fixed in 100% methanol at -20C for 5 minutes.	PIDD1, Enzo Life Sciences, ALX-804-837-C100, 1:500	Ninein, Abcam, ab52473, 1:1000	FGFR1OP, Abnova, H00011116-M01, 1:1000	DAPI	No.6
KAN626-10	RPE-BFP-Cas9 INPP5E KO (pool)		Serum starved for 24 hours. Fixed in 100% methanol at -20C for 5 minutes.	PIDD1, Enzo Life Sciences, ALX-804-837-C100, 1:500	Ninein, Abcam, ab52473, 1:1000	FGFR1OP, Abnova, H00011116-M01, 1:1000	DAPI	No.6
KAN626-11	RPE-BFP-Cas9 Kiz KO (pool)		Serum starved for 24 hours. Fixed in 100% methanol at -20C for 5 minutes.	PIDD1, Enzo Life Sciences, ALX-804-837-C100, 1:500	Ninein, Abcam, ab52473, 1:1000	FGFR1OP, Abnova, H00011116-M01, 1:1000	DAPI	No.6
KAN626-12	RPE-BFP-Cas9 LRRC45 KO (pool)		Serum starved for 24 hours. Fixed in 100% methanol at -20C for 5 minutes.	PIDD1, Enzo Life Sciences, ALX-804-837-C100, 1:500	Ninein, Abcam, ab52473, 1:1000	FGFR1OP, Abnova, H00011116-M01, 1:1000	DAPI	No.6
KAN626-13	RPE-BFP-Cas9 NCS1 KO (pool)		Serum starved for 24 hours. Fixed in 100% methanol at -20C for 5 minutes.	PIDD1, Enzo Life Sciences, ALX-804-837-C100, 1:500	Ninein, Abcam, ab52473, 1:1000	FGFR1OP, Abnova, H00011116-M01, 1:1000	DAPI	No.6
KAN626-14	RPE-BFP-Cas9 C3orf14 KO (pool)		Serum starved for 24 hours. Fixed in 100% methanol at -20C for 5 minutes.	PIDD1, Enzo Life Sciences, ALX-804-837-C100, 1:500	Ninein, Abcam, ab52473, 1:1000	FGFR1OP, Abnova, H00011116-M01, 1:1000	DAPI	No.6
KAN626-15	RPE-BFP-Cas9 FOP KO (pool)		Serum starved for 24 hours. Fixed in 100% methanol at -20C for 5 minutes.	PIDD1, Enzo Life Sciences, ALX-804-837-C100, 1:500	Ninein, Abcam, ab52473, 1:1000	FGFR1OP, Abnova, H00011116-M01, 1:1000	DAPI	No.6
KAN626-16	RPE-BFP-Cas9 sgSafe (pool)		Serum starved for 24 hours. Fixed in 100% methanol at -20C for 5 minutes.	PIDD1, Enzo Life Sciences, ALX-804-837-C100, 1:500	Ninein, Abcam, ab52473, 1:1000	FGFR1OP, Abnova, H00011116-M01, 1:1000	DAPI	No.6
