# Supplementary material for: A hierarchical pathway for assembly of the distal appendages that organize primary cilia
Source: eLife. 2025 Jan 30;14:e85999. doi: 10.7554/eLife.85999 (PMC11984956; doi:10.7554/eLife.85999)
Supplement: Figure 2—source data 12. [file elife-85999-fig2-data12.xlsx]

## Sheet: CEP170
	Label	Area	Mean	Min	Max	X	Y	Circ	IntDen	RawIntDen	AR	Round	Solidity
811	CEP170_KAN619-1_1.tif:0001-0153	0.976	147.761	0	497	20.422	11.069	0.901	144.26	27779	1.023	0.978	0.926	1.35099
812	CEP170_KAN619-1_1.tif:0002-0306	0.872	123.673	0	341	58.549	22.01	0.88	107.898	20777	1.226	0.815	0.955	1.01046
813	CEP170_KAN619-1_1.tif:0003-0431	0.737	139.711	0	459	86.816	31.051	0.93	103.027	19839	1.192	0.839	0.937	0.964841
814	CEP170_KAN619-1_1.tif:0004-0504	0.711	101.825	0	230	64.524	36.319	0.754	72.444	13950	1.773	0.564	0.87	0.678438
815	CEP170_KAN619-1_1.tif:0005-0528	0.691	100.188	0	246	40.252	38.107	0.826	69.199	13325	1.4	0.714	0.914	0.648042
816	CEP170_KAN619-1_1.tif:0006-0751	0.535	108.252	6	204	4.906	54.131	0.794	57.904	11150	1.613	0.62	0.866	0.542264
817	CEP170_KAN619-1_1.tif:0007-0769	0.956	129.016	0	454	33.071	55.429	0.835	123.28	23739	1.487	0.672	0.918	1.15451
818	CEP170_KAN619-1_1.tif:0008-0968	0.971	154.032	0	503	21.286	69.775	0.917	149.583	28804	1.023	0.978	0.935	1.40084
819	CEP170_KAN619-1_1.tif:0009-1030	0.919	131.26	0	414	76.88	74.205	0.868	120.652	23233	1.104	0.906	0.929	1.1299
820	CEP170_KAN619-1_1.tif:0010-1046	1.246	111.158	0	342	56.823	75.365	0.763	138.543	26678	1.381	0.724	0.863	1.29745
832	CEP170_KAN619-1_2.tif:0001-0089	1.527	92.629	0	444	17.863	6.362	0.685	141.425	27233	1.771	0.565	0.87	1.32444
833	CEP170_KAN619-1_2.tif:0002-0208	1.329	119.406	0	661	79.935	15.019	0.667	158.744	30568	1.961	0.51	0.839	1.48663
834	CEP170_KAN619-1_2.tif:0003-0375	1.096	134.583	0	385	31.065	26.999	0.881	147.47	28397	1.142	0.876	0.908	1.38105
835	CEP170_KAN619-1_2.tif:0004-0402	0.815	114.745	0	297	11.072	28.911	0.803	93.555	18015	1.369	0.73	0.915	0.876133
836	CEP170_KAN619-1_2.tif:0005-0484	1.516	114.647	0	492	74.545	34.759	0.696	173.851	33477	1.603	0.624	0.885	1.62811
837	CEP170_KAN619-1_2.tif:0006-0502	0.821	158.082	0	555	18.908	36.176	0.947	129.709	24977	1.351	0.74	0.958	1.21472
838	CEP170_KAN619-1_2.tif:0007-0671	1.2	106.095	0	413	60.957	48.417	0.74	127.274	24508	1.729	0.578	0.899	1.19191
839	CEP170_KAN619-1_2.tif:0008-0815	1.35	93.519	0	372	32.467	58.729	0.651	126.271	24315	1.678	0.596	0.811	1.18252
840	CEP170_KAN619-1_2.tif:0009-1036	0.821	112.411	0	262	50.873	74.678	0.79	92.235	17761	1.673	0.598	0.927	0.86378
841	CEP170_KAN619-1_2.tif:0010-1060	0.898	124.347	0	463	9.816	76.377	0.868	111.715	21512	1.329	0.752	0.93	1.0462
842	CEP170_KAN619-1_2.tif:0011-1147	0.789	101.809	0	332	76.546	82.715	0.866	80.364	15475	1.222	0.818	0.938	0.752604
853	CEP170_KAN619-1_3.tif:0001-0047	0.53	125.725	0	462	78.803	3.369	0.95	66.597	12824	1.12	0.893	0.971	0.623677
854	CEP170_KAN619-1_3.tif:0002-0177	1.007	160.16	0	621	65.818	12.771	0.9	161.356	31071	1.069	0.936	0.924	1.51109
855	CEP170_KAN619-1_3.tif:0003-0194	0.878	147.746	0	430	46.284	13.992	0.943	129.668	24969	1.141	0.876	0.936	1.21433
856	CEP170_KAN619-1_3.tif:0004-0394	1.345	122.456	0	577	80.814	28.34	0.823	164.706	31716	1.423	0.703	0.914	1.54246
857	CEP170_KAN619-1_3.tif:0005-0556	0.582	115.286	0	316	13.659	40.098	0.899	67.054	12912	1.146	0.872	0.937	0.627956
858	CEP170_KAN619-1_3.tif:0006-0662	0.966	125.301	0	564	26.121	47.677	0.852	121.031	23306	1.203	0.831	0.928	1.13345
859	CEP170_KAN619-1_3.tif:0007-0724	1.158	130.821	0	415	47.772	52.139	0.842	151.5	29173	1.508	0.663	0.91	1.41879
860	CEP170_KAN619-1_3.tif:0008-0982	1.075	99.531	0	286	70.955	70.757	0.716	106.994	20603	1.822	0.549	0.857	1.002
861	CEP170_KAN619-1_3.tif:0009-1104	1.262	143.951	0	516	59.321	79.615	0.773	181.656	34980	1.381	0.724	0.879	1.7012
862	CEP170_KAN619-1_3.tif:0010-1129	1.132	124.202	0	336	42.987	81.338	0.754	140.61	27076	1.667	0.6	0.869	1.3168
875	CEP170_KAN619-1_4.tif:0001-0113	0.919	160.023	0	792	64.453	8.15	0.848	147.091	28324	1.36	0.735	0.912	1.3775
876	CEP170_KAN619-1_4.tif:0002-0130	0.743	121.545	0	313	88.705	9.388	0.912	90.262	17381	1.128	0.886	0.941	0.8453
877	CEP170_KAN619-1_4.tif:0003-0233	1.324	125.016	0	403	13.551	16.762	0.858	165.552	31879	1.091	0.916	0.909	1.55039
878	CEP170_KAN619-1_4.tif:0004-0334	0.846	157.681	0	495	38.301	24.103	0.942	133.474	25702	1.169	0.856	0.95	1.24998
879	CEP170_KAN619-1_4.tif:0005-0518	0.914	151.625	0	469	27.551	37.324	0.913	138.584	26686	1.144	0.874	0.941	1.29783
880	CEP170_KAN619-1_4.tif:0006-0534	0.95	149.191	0	541	43.126	38.505	0.909	141.783	27302	1.168	0.856	0.917	1.32779
881	CEP170_KAN619-1_4.tif:0007-0561	1.033	175.111	0	880	73.728	40.468	0.915	180.966	34847	1.163	0.86	0.93	1.69473
882	CEP170_KAN619-1_4.tif:0008-0699	0.904	124.966	0	455	13.273	50.368	0.834	112.92	21744	1.298	0.771	0.906	1.05749
883	CEP170_KAN619-1_4.tif:0009-0720	0.867	122.216	0	418	23.955	51.877	0.846	105.992	20410	1.12	0.893	0.9	0.992611
884	CEP170_KAN619-1_4.tif:0010-0755	0.914	155.818	0	576	83.765	54.412	0.883	142.417	27424	1.245	0.803	0.926	1.33373
885	CEP170_KAN619-1_4.tif:0011-0809	1.262	103.893	0	339	54.559	58.237	0.824	131.106	25246	1.345	0.744	0.907	1.2278
886	CEP170_KAN619-1_4.tif:0012-1263	0.883	127.135	0	494	30.885	91.038	0.861	112.239	21613	1.436	0.696	0.95	1.05112
899	CEP170_KAN619-1_5.tif:0001-0064	1.07	144.175	0	423	58.977	4.608	0.842	154.236	29700	1.462	0.684	0.914	1.44442
900	CEP170_KAN619-1_5.tif:0002-0161	0.878	136.053	0	498	56.424	11.621	0.967	119.406	22993	1.098	0.911	0.934	1.11823
901	CEP170_KAN619-1_5.tif:0003-0246	0.888	149.129	0	612	30.465	17.786	0.931	132.43	25501	1.303	0.768	0.934	1.2402
902	CEP170_KAN619-1_5.tif:0004-0283	0.826	146.113	0	448	9.958	20.369	0.896	120.647	23232	1.144	0.874	0.935	1.12985
903	CEP170_KAN619-1_5.tif:0005-0471	0.867	107.06	0	296	27.623	33.99	0.782	92.848	17879	1.8	0.555	0.908	0.869519
904	CEP170_KAN619-1_5.tif:0006-0637	0.763	128.061	0	414	43.553	45.96	0.89	97.761	18825	1.264	0.791	0.951	0.915527
905	CEP170_KAN619-1_5.tif:0007-0734	1.174	142.969	0	520	63.028	52.902	0.668	167.796	32311	1.492	0.67	0.829	1.5714
906	CEP170_KAN619-1_5.tif:0008-0808	1.402	131.959	0	701	84.068	58.32	0.772	185.027	35629	1.384	0.722	0.893	1.73276
907	CEP170_KAN619-1_5.tif:0009-0879	1.059	133.275	0	402	30.54	63.302	0.851	141.191	27188	1.461	0.685	0.907	1.32225
908	CEP170_KAN619-1_5.tif:0010-1020	0.883	121.047	0	391	24.69	73.478	0.882	106.865	20578	1.072	0.933	0.924	1.00078
909	CEP170_KAN619-1_5.tif:0011-1178	0.556	100.589	0	290	18.395	84.905	0.924	55.894	10763	1.246	0.803	0.955	0.523443
910	CEP170_KAN619-1_5.tif:0012-1199	0.748	118.479	0	343	91.279	86.49	0.773	88.6	17061	1.425	0.702	0.892	0.829737
922	CEP170_KAN619-1_6.tif:0001-0111	0.55	104.962	0	243	51.954	7.979	0.888	57.779	11126	1.261	0.793	0.942	0.541097
923	CEP170_KAN619-1_6.tif:0002-0225	1.428	158.091	0	887	37.984	16.24	0.773	225.772	43475	1.712	0.584	0.903	2.11434
924	CEP170_KAN619-1_6.tif:0003-0383	0.691	5.286	0	28	35.094	27.624	0.704	3.651	703	2.18	0.459	0.893	0.0341894
925	CEP170_KAN619-1_6.tif:0004-0435	0.935	150.267	0	641	67.568	31.368	0.862	140.464	27048	1.126	0.888	0.918	1.31544
926	CEP170_KAN619-1_6.tif:0005-0672	0.67	115.155	0	266	35.673	48.39	0.902	77.144	14855	1.286	0.777	0.938	0.722451
927	CEP170_KAN619-1_6.tif:0006-0674	0.831	131.656	0	378	8.789	48.611	0.925	109.394	21065	1.244	0.804	0.928	1.02447
928	CEP170_KAN619-1_6.tif:0007-0758	0.909	149.429	0	457	65.85	54.699	0.908	135.801	26150	1.165	0.858	0.938	1.27177
929	CEP170_KAN619-1_6.tif:0008-0782	0.758	135.507	0	351	59.971	56.371	0.907	102.741	19784	1.188	0.842	0.948	0.962166
930	CEP170_KAN619-1_6.tif:0009-0950	1.148	127.376	0	441	36.123	68.496	0.795	146.187	28150	1.18	0.848	0.863	1.36903
931	CEP170_KAN619-1_6.tif:0010-1020	0.966	177.651	0	674	71.198	73.558	0.883	171.597	33043	1.044	0.958	0.916	1.607
932	CEP170_KAN619-1_6.tif:0011-1150	0.717	117.022	0	341	14.616	82.9	0.904	83.864	16149	1.372	0.729	0.939	0.785383
										23574.4				1.1465
														0
														0
														0
941	CEP170_KAN619-2_1.tif:0001-0490	1.563	84.532	0	421	67.229	35.297	0.809	132.134	25444	1.654	0.605	0.947	1.23743
942	CEP170_KAN619-2_1.tif:0002-0517	1.303	123.506	0	515	88.677	37.314	0.892	160.988	31000	1.369	0.73	0.945	1.50764
943	CEP170_KAN619-2_1.tif:0003-0552	1.2	87.268	0	388	11.353	39.707	0.685	104.689	20159	1.959	0.511	0.84	0.980404
944	CEP170_KAN619-2_1.tif:0004-0616	1.407	85.376	0	376	41.955	44.356	0.746	120.154	23137	2.145	0.466	0.971	1.12523
945	CEP170_KAN619-2_1.tif:0005-0722	0.587	111.372	0	300	2.594	52.086	0.79	65.356	12585	1.522	0.657	0.886	0.612053
946	CEP170_KAN619-2_1.tif:0006-0913	1.303	124.458	0	366	83.079	65.763	0.848	162.229	31239	1.505	0.665	0.951	1.51926
947	CEP170_KAN619-2_1.tif:0007-0966	1.226	117.585	0	494	15.228	69.635	0.692	144.11	27750	1.611	0.621	0.828	1.34958
948	CEP170_KAN619-2_1.tif:0008-1180	1.444	83.363	0	399	61.293	85.122	0.773	120.351	23175	1.734	0.577	0.913	1.12708
959	CEP170_KAN619-2_2.tif:0001-0071	0.914	142.648	0	405	80.265	5.124	0.892	130.379	25106	1.461	0.685	0.949	1.22099
960	CEP170_KAN619-2_2.tif:0002-0482	0.649	113.104	0	256	14.698	34.815	0.841	73.421	14138	1.244	0.804	0.883	0.687581
961	CEP170_KAN619-2_2.tif:0003-0489	1.044	156.05	0	560	84.636	35.334	0.846	162.888	31366	1.164	0.859	0.916	1.52544
962	CEP170_KAN619-2_2.tif:0004-0521	0.898	142.757	0	411	44.649	37.528	0.965	128.255	24697	1.223	0.818	0.948	1.2011
963	CEP170_KAN619-2_2.tif:0005-0568	1.122	123.324	0	640	59.45	41.003	0.822	138.335	26638	1.497	0.668	0.919	1.2955
964	CEP170_KAN619-2_2.tif:0006-0758	0.758	117.63	0	285	42.814	54.671	0.875	89.187	17174	1.242	0.805	0.904	0.835233
965	CEP170_KAN619-2_2.tif:0007-0953	1.371	108.742	0	506	38.032	68.714	0.809	149.085	28708	1.442	0.693	0.904	1.39617
966	CEP170_KAN619-2_2.tif:0008-1022	1.049	79.257	0	310	55.117	73.617	0.775	83.142	16010	1.358	0.736	0.871	0.778623
967	CEP170_KAN619-2_2.tif:0009-1058	1.246	97.392	0	345	80.843	76.139	0.799	121.385	23374	1.35	0.741	0.894	1.13676
968	CEP170_KAN619-2_2.tif:0010-1066	0.826	124.667	0	365	32.348	76.9	0.875	102.939	19822	1.2	0.834	0.919	0.964014
979	CEP170_KAN619-2_3.tif:0001-0192	0.956	82.913	0	312	11.16	13.865	0.758	79.227	15256	1.393	0.718	0.868	0.741953
980	CEP170_KAN619-2_3.tif:0002-0267	1.272	120.653	0	469	7.172	19.217	0.831	153.509	29560	1.316	0.76	0.906	1.43761
981	CEP170_KAN619-2_3.tif:0003-0274	1.257	112.364	0	438	73.582	19.778	0.844	141.212	27192	1.399	0.715	0.929	1.32244
982	CEP170_KAN619-2_3.tif:0004-0438	1.002	96.176	0	297	38.643	31.612	0.82	96.395	18562	1.345	0.744	0.915	0.902736
983	CEP170_KAN619-2_3.tif:0005-0545	0.701	124.111	0	361	82.336	39.294	0.971	87.011	16755	1.199	0.834	0.951	0.814855
984	CEP170_KAN619-2_3.tif:0006-0573	1.397	120.807	0	359	15.093	41.275	0.772	168.762	32497	1.858	0.538	0.883	1.58044
985	CEP170_KAN619-2_3.tif:0007-0737	0.623	76.7	0	220	56.72	53.103	0.826	47.798	9204	2.026	0.494	0.972	0.447623
986	CEP170_KAN619-2_3.tif:0008-0798	1.163	107.696	0	363	32.818	57.494	0.836	125.279	24124	1.302	0.768	0.918	1.17324
987	CEP170_KAN619-2_3.tif:0009-0844	0.634	97.844	0	207	52.494	60.821	0.77	61.991	11937	2.127	0.47	0.9	0.580539
988	CEP170_KAN619-2_3.tif:0010-1189	0.561	120.046	0	287	39.201	85.75	0.894	67.329	12965	1.352	0.74	0.931	0.630534
994	CEP170_KAN619-2_4.tif:0001-0105	0.8	120.558	0	314	60.756	7.636	0.89	96.416	18566	1.203	0.831	0.911	0.90293
995	CEP170_KAN619-2_4.tif:0002-0312	1.283	77.567	0	420	18.993	22.496	0.735	99.496	19159	2.075	0.482	0.917	0.93177
996	CEP170_KAN619-2_4.tif:0003-0449	1.2	97.909	0	634	58.209	32.419	0.675	117.453	22617	1.825	0.548	0.868	1.09994
997	CEP170_KAN619-2_4.tif:0004-0841	1.527	129.653	0	649	77.443	60.558	0.787	197.952	38118	1.7	0.588	0.883	1.85381
998	CEP170_KAN619-2_4.tif:0005-1270	1.039	97.585	0	488	58.373	91.45	0.703	101.355	19517	2.23	0.448	0.909	0.949181
1008	CEP170_KAN619-2_5.tif:0001-0072	1.096	148.507	0	534	35.701	5.216	0.94	162.727	31335	1.162	0.86	0.925	1.52393
1009	CEP170_KAN619-2_5.tif:0002-0212	1.132	116.495	0	372	53.437	15.305	0.737	131.885	25396	1.71	0.585	0.888	1.2351
1010	CEP170_KAN619-2_5.tif:0003-0282	0.997	171.281	0	590	36.788	20.348	0.92	170.782	32886	1.224	0.817	0.95	1.59936
1011	CEP170_KAN619-2_5.tif:0004-0421	0.961	71.422	0	267	27.236	30.366	0.786	68.617	13213	1.696	0.59	0.892	0.642595
1012	CEP170_KAN619-2_5.tif:0005-0438	0.556	112.626	0	285	72.178	31.562	0.885	62.583	12051	1.391	0.719	0.922	0.586083
1013	CEP170_KAN619-2_5.tif:0006-0656	0.945	119.571	0	427	52.802	47.347	0.864	113.013	21762	1.215	0.823	0.905	1.05836
1014	CEP170_KAN619-2_5.tif:0007-0842	1.018	152.73	0	496	47.679	60.695	0.862	155.457	29935	1.324	0.755	0.903	1.45585
1015	CEP170_KAN619-2_5.tif:0008-1018	0.732	124.865	0	307	82.788	73.324	0.876	91.431	17606	1.232	0.811	0.931	0.856242
1016	CEP170_KAN619-2_5.tif:0009-1174	0.779	95.38	0	371	25.865	84.611	0.833	74.298	14307	1.216	0.823	0.923	0.6958
1023	CEP170_KAN619-2_6.tif:0001-0341	1.381	92.297	0	556	78.224	24.574	0.666	127.497	24551	2.356	0.424	0.842	1.194
1024	CEP170_KAN619-2_6.tif:0002-0485	1.236	127.147	0	543	48.057	34.916	0.863	157.15	30261	1.262	0.793	0.914	1.4717
1025	CEP170_KAN619-2_6.tif:0003-0571	0.945	87.824	0	301	6.164	41.116	0.766	83.007	15984	1.48	0.676	0.867	0.777359
1026	CEP170_KAN619-2_6.tif:0004-0856	1.189	85.188	0	381	26.132	61.706	0.702	101.308	19508	1.917	0.522	0.851	0.948743
1027	CEP170_KAN619-2_6.tif:0005-1038	1.288	95.294	0	492	34.536	74.77	0.848	122.73	23633	1.595	0.627	0.938	1.14936
1028	CEP170_KAN619-2_6.tif:0006-1072	1.387	130.846	0	699	55.187	77.181	0.745	181.428	34936	1.437	0.696	0.887	1.69906
										22602.4				1.09923
														0
														0
														0
1036	CEP170_KAN619-3_1.tif:0001-0527	0.711	106.467	0	342	37.643	37.932	0.851	75.747	14586	1.202	0.832	0.913	0.709369
1037	CEP170_KAN619-3_1.tif:0002-0624	0.982	107.169	0	427	68.425	45.005	0.858	105.187	20255	1.519	0.658	0.926	0.985073
1038	CEP170_KAN619-3_1.tif:0003-0842	0.727	200.736	0	791	91.621	60.727	0.87	145.943	28103	1.072	0.933	0.949	1.36675
1039	CEP170_KAN619-3_1.tif:0004-0847	0.904	103.69	0	265	4.182	61.041	0.873	93.695	18042	1.586	0.631	0.923	0.877446
1040	CEP170_KAN619-3_1.tif:0005-0904	0.872	129.679	0	341	57.133	65.148	0.863	113.138	21786	1.515	0.66	0.911	1.05953
1041	CEP170_KAN619-3_1.tif:0006-1072	0.956	138.755	0	469	44.518	77.27	0.906	132.586	25531	1.499	0.667	0.918	1.24166
1042	CEP170_KAN619-3_1.tif:0007-1181	0.743	115.392	0	273	74.031	85.15	0.787	85.692	16501	1.783	0.561	0.902	0.802502
1054	CEP170_KAN619-3_2.tif:0001-0036	1.158	227.045	0	732	81.69	2.592	0.931	262.934	50631	1.327	0.754	0.953	2.46237
1055	CEP170_KAN619-3_2.tif:0002-0052	0.649	108.84	0	251	35.582	3.742	0.806	70.653	13605	1.747	0.573	0.933	0.661659
1056	CEP170_KAN619-3_2.tif:0003-0279	1.168	157.889	0	507	12.358	20.105	0.849	184.487	35525	1.515	0.66	0.928	1.72771
1057	CEP170_KAN619-3_2.tif:0004-0373	0.748	116.431	0	406	71.58	26.943	0.781	87.068	16766	1.705	0.586	0.929	0.81539
1058	CEP170_KAN619-3_2.tif:0005-0730	0.815	149.013	0	467	66.848	52.66	0.843	121.494	23395	1.578	0.634	0.932	1.13778
1059	CEP170_KAN619-3_2.tif:0006-0740	1.127	147.424	0	645	49.818	53.306	0.843	166.134	31991	1.156	0.865	0.9	1.55584
1060	CEP170_KAN619-3_2.tif:0007-0906	0.95	142.137	0	509	35.667	65.248	0.83	135.079	26011	1.35	0.741	0.908	1.26501
1061	CEP170_KAN619-3_2.tif:0008-1033	0.571	91.445	0	279	20.25	74.446	0.843	52.238	10059	1.746	0.573	0.991	0.489205
1062	CEP170_KAN619-3_2.tif:0009-1076	0.717	135.319	0	513	16.554	77.497	0.848	96.977	18674	1.506	0.664	0.905	0.908183
1063	CEP170_KAN619-3_2.tif:0010-1182	0.94	137.287	0	443	65.121	85.186	0.93	129.045	24849	1.202	0.832	0.943	1.2085
1064	CEP170_KAN619-3_2.tif:0011-1228	1.08	121.639	0	378	65.265	88.546	0.887	131.392	25301	1.262	0.792	0.912	1.23048
1077	CEP170_KAN619-3_3.tif:0001-0128	0.935	157.733	0	520	66.304	9.274	0.871	147.444	28392	1.51	0.662	0.955	1.3808
1078	CEP170_KAN619-3_3.tif:0002-0273	0.576	133.82	0	440	81.557	19.68	0.902	77.139	14854	1.248	0.801	0.969	0.722403
1079	CEP170_KAN619-3_3.tif:0003-0331	1.106	151.155	0	474	88.278	23.871	0.881	167.199	32196	1.353	0.739	0.912	1.56581
1080	CEP170_KAN619-3_3.tif:0004-0364	1.018	180.434	0	791	42.906	26.234	0.881	183.656	35365	1.43	0.699	0.918	1.71993
1081	CEP170_KAN619-3_3.tif:0005-0467	0.748	116.007	0	362	70.621	33.703	0.872	86.752	16705	1.426	0.701	0.944	0.812423
1082	CEP170_KAN619-3_3.tif:0006-0473	0.982	155.323	0	489	7.287	34.04	0.885	152.45	29356	1.189	0.841	0.938	1.42769
1083	CEP170_KAN619-3_3.tif:0007-0614	1.309	143.766	0	527	11.709	44.294	0.734	188.143	36229	2.261	0.442	0.887	1.76194
1084	CEP170_KAN619-3_3.tif:0008-0696	0.774	167.705	0	586	47.961	50.168	0.926	129.766	24988	1.047	0.955	0.955	1.21526
1085	CEP170_KAN619-3_3.tif:0009-0716	0.992	175.168	0	568	41.649	51.644	0.972	173.747	33457	1.175	0.851	0.941	1.62713
1086	CEP170_KAN619-3_3.tif:0010-0752	0.971	176.005	0	647	26.665	54.265	0.888	170.922	32913	1.234	0.81	0.919	1.60068
1087	CEP170_KAN619-3_3.tif:0011-0924	0.883	165.471	0	618	67.825	66.596	0.935	146.083	28130	1.159	0.863	0.955	1.36806
1088	CEP170_KAN619-3_3.tif:0012-1064	0.852	110.799	0	446	20.801	76.655	0.728	94.365	18171	1.598	0.626	0.843	0.88372
1103	CEP170_KAN619-3_4.tif:0001-0064	0.54	136.144	0	474	87.731	4.607	0.969	73.53	14159	1.108	0.903	0.977	0.688602
1104	CEP170_KAN619-3_4.tif:0002-0107	0.852	133.122	0	432	8.3	7.713	0.872	113.377	21832	1.593	0.628	0.934	1.06177
1105	CEP170_KAN619-3_4.tif:0003-0241	1.366	228	0	1048	35.879	17.43	0.843	311.402	59964	1.593	0.628	0.946	2.91626
1106	CEP170_KAN619-3_4.tif:0004-0586	1.215	188.402	0	784	42.026	42.292	0.848	228.945	44086	1.514	0.66	0.923	2.14406
1107	CEP170_KAN619-3_4.tif:0005-0619	1.023	146.893	0	513	69.181	44.652	0.866	150.279	28938	1.518	0.659	0.929	1.40736
1108	CEP170_KAN619-3_4.tif:0006-0641	0.545	6.905	0	35	68.347	46.229	0.703	3.765	725	2.185	0.458	0.875	0.0352593
1109	CEP170_KAN619-3_4.tif:0007-0685	0.639	111.236	10	247	89.715	49.431	0.745	71.053	13682	2.025	0.494	0.918	0.665404
1110	CEP170_KAN619-3_4.tif:0008-0732	1.158	176.188	0	682	71.527	52.696	0.832	204.039	39290	1.505	0.664	0.937	1.91081
1111	CEP170_KAN619-3_4.tif:0009-0840	1.059	137.005	0	349	19.604	60.491	0.87	145.143	27949	1.291	0.775	0.919	1.35926
1112	CEP170_KAN619-3_4.tif:0010-0981	0.904	261.511	0	1302	53.736	70.72	0.957	236.304	45503	1.185	0.844	0.967	2.21297
1113	CEP170_KAN619-3_4.tif:0011-1093	0.878	148.325	0	547	73.092	78.76	0.856	130.177	25067	1.163	0.86	0.923	1.2191
1114	CEP170_KAN619-3_4.tif:0012-1157	0.8	111.39	0	324	63.542	83.388	0.868	89.083	17154	1.484	0.674	0.922	0.83426
1115	CEP170_KAN619-3_4.tif:0013-1263	0.831	124.069	0	344	28.339	91.016	0.902	103.089	19851	1.155	0.866	0.92	0.965425
1116	CEP170_KAN619-3_4.tif:0014-1267	0.737	109.683	0	368	18.917	91.284	0.789	80.883	15575	1.206	0.829	0.887	0.757468
1131	CEP170_KAN619-3_5.tif:0001-0197	0.976	179.793	0	639	42.666	14.189	0.913	175.534	33801	1.121	0.892	0.926	1.64386
1132	CEP170_KAN619-3_5.tif:0002-0201	1.132	172.174	0	575	78.41	14.47	0.83	194.92	37534	1.604	0.623	0.938	1.82541
1133	CEP170_KAN619-3_5.tif:0003-0238	1.023	156.152	0	634	10.176	17.151	0.83	159.752	30762	1.499	0.667	0.923	1.49607
1134	CEP170_KAN619-3_5.tif:0004-0351	0.717	118.522	0	338	16.312	25.305	0.836	84.939	16356	1.924	0.52	0.955	0.79545
1135	CEP170_KAN619-3_5.tif:0005-0451	1.345	118.398	0	526	33.009	32.563	0.823	159.248	30665	1.749	0.572	0.928	1.49135
1136	CEP170_KAN619-3_5.tif:0006-0541	0.836	141.957	0	449	57.395	38.966	0.873	118.689	22855	1.3	0.769	0.955	1.11152
1137	CEP170_KAN619-3_5.tif:0007-0549	0.711	141.803	0	449	19.633	39.573	0.907	100.887	19427	1.167	0.857	0.955	0.944804
1138	CEP170_KAN619-3_5.tif:0008-0623	0.867	109.198	0	273	81.672	44.896	0.765	94.702	18236	1.435	0.697	0.881	0.886881
1139	CEP170_KAN619-3_5.tif:0009-0648	0.613	143.551	0	562	40.344	46.732	0.976	87.967	16939	1.12	0.893	0.955	0.823804
1140	CEP170_KAN619-3_5.tif:0010-0772	0.924	180.264	0	623	12.585	55.68	0.893	166.633	32087	1.378	0.726	0.93	1.5605
1141	CEP170_KAN619-3_5.tif:0011-0866	0.904	165.287	0	659	63.138	62.435	0.894	149.355	28760	1.116	0.896	0.921	1.3987
1142	CEP170_KAN619-3_5.tif:0012-0916	1.054	178.665	0	689	46.165	65.998	0.946	188.35	36269	1.122	0.891	0.921	1.76389
1143	CEP170_KAN619-3_5.tif:0013-0982	0.696	126.164	0	369	32.451	70.78	0.937	87.795	16906	1.322	0.756	0.95	0.822199
1144	CEP170_KAN619-3_5.tif:0014-1138	0.685	113.886	0	332	7.096	81.982	0.865	78.069	15033	1.299	0.77	0.907	0.731108
1152	CEP170_KAN619-3_6.tif:0001-0178	1.018	171.194	0	707	60.694	12.819	0.843	174.251	33554	1.235	0.81	0.912	1.63185
1153	CEP170_KAN619-3_6.tif:0002-0220	0.737	3.507	0	18	31.458	15.888	0.797	2.586	498	1.947	0.514	0.963	0.0242195
1154	CEP170_KAN619-3_6.tif:0003-0381	0.924	186.191	0	745	38.28	27.483	0.969	172.111	33142	1.228	0.814	0.954	1.61181
1155	CEP170_KAN619-3_6.tif:0004-0556	0.743	116.538	0	346	26.291	40.09	0.815	86.544	16665	1.115	0.897	0.899	0.810478
1156	CEP170_KAN619-3_6.tif:0005-0653	1.283	161.215	0	501	57.974	47.061	0.825	206.791	39820	1.175	0.851	0.887	1.93659
1157	CEP170_KAN619-3_6.tif:0006-0911	1.101	145	0	505	66.156	65.615	0.866	159.637	30740	1.309	0.764	0.918	1.495
1158	CEP170_KAN619-3_6.tif:0007-1036	0.867	126.521	0	487	33.605	74.631	0.875	109.726	21129	1.375	0.728	0.944	1.02758
										25497.2				1.24002
														0
														0
														0
1167	CEP170_KAN619-4_1.tif:0001-0245	0.753	135.593	0	472	80.769	17.659	0.847	102.102	19661	1.344	0.744	0.909	0.956184
1168	CEP170_KAN619-4_1.tif:0002-0411	1.08	131.221	0	366	37.828	29.613	0.825	141.742	27294	1.186	0.843	0.887	1.3274
1169	CEP170_KAN619-4_1.tif:0003-0541	0.94	122.215	0	336	24.835	38.992	0.803	114.878	22121	1.331	0.752	0.892	1.07582
1170	CEP170_KAN619-4_1.tif:0004-0704	1.059	178.309	0	698	70.728	50.765	0.859	188.901	36375	1.086	0.921	0.915	1.76905
1171	CEP170_KAN619-4_1.tif:0005-0773	0.795	111.725	0	348	8.938	55.697	0.821	88.772	17094	1.369	0.73	0.897	0.831342
1172	CEP170_KAN619-4_1.tif:0006-0828	0.758	125.199	0	326	41.872	59.64	0.884	94.926	18279	1.166	0.858	0.939	0.888973
1173	CEP170_KAN619-4_1.tif:0007-0892	1.039	147.88	0	584	53.612	64.247	0.817	153.593	29576	1.585	0.631	0.924	1.43839
1174	CEP170_KAN619-4_1.tif:0008-1218	0.956	106.043	0	367	80.956	87.77	0.799	101.329	19512	1.633	0.612	0.918	0.948938
1181	CEP170_KAN619-4_2.tif:0001-0102	0.753	136.697	0	434	62.04	7.402	0.915	102.933	19821	1.278	0.782	0.927	0.963966
1182	CEP170_KAN619-4_2.tif:0002-0259	0.696	120.343	0	355	23.613	18.667	0.855	83.745	16126	1.622	0.616	0.931	0.784265
1183	CEP170_KAN619-4_2.tif:0003-0291	0.685	120.879	0	364	89.211	21.002	0.898	82.862	15956	1.283	0.78	0.953	0.775997
1184	CEP170_KAN619-4_2.tif:0004-0306	0.987	121.295	0	367	44.149	22.093	0.818	119.681	23046	1.243	0.805	0.886	1.12081
1185	CEP170_KAN619-4_2.tif:0005-0672	0.784	118.887	0	435	20.067	48.38	0.783	93.227	17952	1.218	0.821	0.873	0.873069
1186	CEP170_KAN619-4_2.tif:0006-1179	0.997	146.74	0	520	64.658	85.023	0.871	146.312	28174	1.456	0.687	0.939	1.3702
1195	CEP170_KAN619-4_3.tif:0001-0460	0.769	98.061	0	282	41.258	33.147	0.776	75.368	14513	1.894	0.528	0.916	0.705819
1196	CEP170_KAN619-4_3.tif:0002-0654	0.628	103.074	0	229	80.469	47.145	0.78	64.769	12472	1.967	0.508	0.927	0.606558
1197	CEP170_KAN619-4_3.tif:0003-0715	1.158	159.749	0	541	77.858	51.474	0.786	185.001	35624	1.469	0.681	0.875	1.73252
1198	CEP170_KAN619-4_3.tif:0004-0754	0.774	106.752	0	284	2.757	54.28	0.82	82.602	15906	1.159	0.863	0.884	0.773565
1199	CEP170_KAN619-4_3.tif:0005-0857	0.597	114.843	0	263	55.188	61.769	0.924	68.586	13207	1.077	0.928	0.947	0.642303
1200	CEP170_KAN619-4_3.tif:0006-0963	0.821	99.525	0	327	38.828	69.338	0.73	81.662	15725	1.185	0.844	0.866	0.764763
1201	CEP170_KAN619-4_3.tif:0007-1141	0.691	133.812	0	429	90.63	82.231	0.915	92.422	17797	1.053	0.95	0.971	0.865531
1202	CEP170_KAN619-4_3.tif:0008-1207	0.582	123.241	0	390	52.142	86.99	0.927	71.681	13803	1.311	0.763	0.945	0.671289
1209	CEP170_KAN619-4_4.tif:0001-0144	0.774	120.174	0	348	71.889	10.46	0.893	92.988	17906	1.281	0.78	0.94	0.870832
1210	CEP170_KAN619-4_4.tif:0002-0321	1.039	198.035	0	694	27.774	23.16	0.919	205.685	39607	1.206	0.829	0.932	1.92623
1211	CEP170_KAN619-4_4.tif:0003-0602	1.007	154.304	0	639	22.184	43.435	0.853	155.457	29935	1.247	0.802	0.911	1.45585
1212	CEP170_KAN619-4_4.tif:0004-0642	0.966	215.602	0	865	57.915	46.307	0.912	208.256	40102	1.338	0.747	0.947	1.9503
1213	CEP170_KAN619-4_4.tif:0005-0860	0.68	151.389	0	441	91.728	62.014	0.814	102.99	19832	1.874	0.534	0.953	0.964501
1214	CEP170_KAN619-4_4.tif:0006-0930	0.769	116.973	0	395	24.348	67.032	0.874	89.904	17312	1.187	0.843	0.946	0.841944
1221	CEP170_KAN619-4_5.tif:0001-0314	0.924	138.202	0	458	79.667	22.706	0.915	127.751	24600	1.11	0.901	0.925	1.19639
1222	CEP170_KAN619-4_5.tif:0002-0339	0.945	126.44	0	378	52.589	24.407	0.884	119.505	23012	1.07	0.935	0.912	1.11916
1223	CEP170_KAN619-4_5.tif:0003-0631	0.561	6.093	0	24	84.422	45.472	0.661	3.417	658	2.157	0.464	0.837	0.0320009
1224	CEP170_KAN619-4_5.tif:0004-0723	0.758	148.212	0	485	58.34	52.114	0.931	112.375	21639	1.16	0.862	0.951	1.05238
1225	CEP170_KAN619-4_5.tif:0005-0959	0.95	160.792	0	482	57.918	69.102	0.857	152.808	29425	1.129	0.886	0.915	1.43104
1226	CEP170_KAN619-4_5.tif:0006-0980	0.748	124.674	0	362	18.179	70.67	0.909	93.233	17953	1.265	0.791	0.923	0.873118
1235	CEP170_KAN619-4_6.tif:0001-0058	0.727	108.836	0	254	69.712	4.206	0.809	79.128	15237	1.325	0.755	0.862	0.741029
1236	CEP170_KAN619-4_6.tif:0002-0297	0.763	139.184	0	414	36.75	21.395	0.913	106.252	20460	1.166	0.858	0.945	0.995042
1237	CEP170_KAN619-4_6.tif:0003-0338	0.846	139.006	0	382	55.496	24.352	0.966	117.666	22658	1.109	0.902	0.945	1.10194
1238	CEP170_KAN619-4_6.tif:0004-0408	0.602	101.629	0	231	78.219	29.448	0.868	61.222	11789	1.273	0.786	0.917	0.573341
1239	CEP170_KAN619-4_6.tif:0005-0612	0.831	201.719	0	764	52.244	44.092	0.889	167.609	32275	1.174	0.852	0.955	1.56965
1240	CEP170_KAN619-4_6.tif:0006-0846	1.002	155.539	0	537	84.185	60.927	0.83	155.893	30019	1.763	0.567	0.932	1.45993
1241	CEP170_KAN619-4_6.tif:0007-0915	1.059	168.319	0	650	68.869	65.959	0.897	178.317	34337	1.314	0.761	0.938	1.66993
1242	CEP170_KAN619-4_6.tif:0008-0991	0.535	6.243	0	29	86.525	71.431	0.874	3.339	643	1.359	0.736	0.981	0.0312714
1253	CEP170_KAN619-4_7.tif:0001-0168	0.525	91.96	0	224	22.354	12.143	0.811	48.234	9288	1.915	0.522	0.91	0.451708
1254	CEP170_KAN619-4_7.tif:0002-0197	0.904	122.011	0	320	63.283	14.215	0.826	110.251	21230	1.257	0.796	0.874	1.03249
1255	CEP170_KAN619-4_7.tif:0003-0208	0.769	117.291	0	325	14.036	14.997	0.896	90.148	17359	1.203	0.831	0.949	0.84423
1256	CEP170_KAN619-4_7.tif:0004-0485	0.909	157.343	0	517	87.853	34.991	0.908	142.993	27535	1.214	0.824	0.943	1.33912
1257	CEP170_KAN619-4_7.tif:0005-0511	0.587	96.345	0	231	25.161	36.82	0.8	56.538	10887	1.721	0.581	0.919	0.529473
1258	CEP170_KAN619-4_7.tif:0006-0761	0.613	103.78	0	280	17.838	54.866	0.733	63.595	12246	1.852	0.54	0.849	0.595566
1259	CEP170_KAN619-4_7.tif:0007-0804	1.205	141.621	0	508	67.453	57.944	0.809	170.626	32856	1.198	0.835	0.892	1.5979
1260	CEP170_KAN619-4_7.tif:0008-0860	0.639	90.398	0	208	59.337	62.018	0.729	57.743	11119	2.414	0.414	0.875	0.540756
1261	CEP170_KAN619-4_7.tif:0009-1007	0.68	121.092	0	375	26.702	72.589	0.892	82.379	15863	1.295	0.772	0.932	0.771474
1262	CEP170_KAN619-4_7.tif:0010-1134	0.628	112.124	0	371	9.83	81.693	0.88	70.455	13567	1.458	0.686	0.945	0.659811
										20603.5				1.00202
														0
														0
														0
1272	CEP170_KAN619-5_1.tif:0001-0283	0.914	166.352	0	529	25.21	20.399	0.901	152.045	29278	1.299	0.77	0.962	1.42389
1273	CEP170_KAN619-5_1.tif:0002-0288	1.049	80.728	0	258	68.403	20.811	0.718	84.685	16307	1.854	0.539	0.861	0.793067
1274	CEP170_KAN619-5_1.tif:0003-0420	0.94	120.028	0	359	89.849	30.272	0.829	112.821	21725	1.286	0.778	0.912	1.05656
1275	CEP170_KAN619-5_1.tif:0004-0666	0.706	115.699	0	260	65.778	48.032	0.891	81.714	15735	1.457	0.686	0.928	0.765249
1276	CEP170_KAN619-5_1.tif:0005-0720	1.091	134.143	0	434	24.106	51.877	0.861	146.291	28170	1.555	0.643	0.903	1.37001
1277	CEP170_KAN619-5_1.tif:0006-0742	1.205	148.017	0	730	79.02	53.491	0.883	178.333	34340	1.158	0.863	0.93	1.67008
1278	CEP170_KAN619-5_1.tif:0007-0788	0.945	156.692	0	528	1.744	56.821	0.905	148.098	28518	1.274	0.785	0.919	1.38693
1279	CEP170_KAN619-5_1.tif:0008-0960	0.769	118.074	0	332	21.677	69.183	0.92	90.75	17475	1.186	0.843	0.946	0.849871
1280	CEP170_KAN619-5_1.tif:0009-0965	0.982	107.545	0	363	62.359	69.552	0.858	105.556	20326	1.166	0.858	0.913	0.988526
1289	CEP170_KAN619-5_2.tif:0001-0130	0.862	124.145	0	533	60.285	9.379	0.891	107.02	20608	1.17	0.854	0.941	1.00224
1290	CEP170_KAN619-5_2.tif:0002-0169	1.117	135.167	0	396	86.764	12.168	0.818	150.918	29061	1.668	0.599	0.923	1.41334
1291	CEP170_KAN619-5_2.tif:0003-0344	0.961	124.47	0	385	9.694	24.748	0.796	119.583	23027	1.729	0.578	0.907	1.11988
1292	CEP170_KAN619-5_2.tif:0004-0452	0.805	121.6	0	318	61.163	32.565	0.874	97.88	18848	1.24	0.807	0.906	0.916645
1293	CEP170_KAN619-5_2.tif:0005-0775	0.909	157.703	0	558	9.022	55.87	0.878	143.32	27598	1.216	0.822	0.911	1.34219
1294	CEP170_KAN619-5_2.tif:0006-0885	0.696	137.799	0	439	52.063	63.795	0.937	95.891	18465	1.097	0.911	0.957	0.898018
1295	CEP170_KAN619-5_2.tif:0007-0929	0.904	164.316	0	701	78.767	66.99	0.912	148.477	28591	1.188	0.842	0.956	1.39048
1296	CEP170_KAN619-5_2.tif:0008-1187	0.644	111.5	0	286	63.018	85.548	0.892	71.8	13826	1.702	0.588	0.943	0.672407
1307	CEP170_KAN619-5_3.tif:0001-0044	1.08	100.952	0	369	61.005	3.194	0.808	109.046	20998	1.681	0.595	0.904	1.02121
1308	CEP170_KAN619-5_3.tif:0002-0222	0.971	128.834	0	326	48.847	16.018	0.841	125.113	24092	1.351	0.74	0.908	1.17168
1309	CEP170_KAN619-5_3.tif:0003-0361	0.67	98.256	0	339	2.568	26.053	0.854	65.823	12675	1.397	0.716	0.918	0.61643
1310	CEP170_KAN619-5_3.tif:0004-0412	1.122	145.681	0	497	37.547	29.694	0.857	163.413	31467	1.625	0.615	0.917	1.53035
1311	CEP170_KAN619-5_3.tif:0005-0418	1.2	171.065	0	702	75.88	30.114	0.815	205.212	39516	1.134	0.882	0.888	1.9218
1312	CEP170_KAN619-5_3.tif:0006-0456	1.132	117.56	0	391	67.596	32.925	0.862	133.09	25628	1.306	0.766	0.954	1.24638
1313	CEP170_KAN619-5_3.tif:0007-0669	0.696	138.41	0	416	38.539	48.227	0.964	96.317	18547	1.092	0.916	0.947	0.902006
1314	CEP170_KAN619-5_3.tif:0008-0778	0.67	128.256	0	355	43.918	56.097	0.939	85.921	16545	1.265	0.79	0.963	0.804642
1315	CEP170_KAN619-5_3.tif:0009-0813	0.982	88.804	0	283	28.927	58.582	0.779	87.162	16784	1.286	0.777	0.881	0.816265
1316	CEP170_KAN619-5_3.tif:0010-1048	1.111	86.439	0	400	65.027	75.491	0.808	96.063	18498	1.539	0.65	0.89	0.899623
1327	CEP170_KAN619-5_4.tif:0001-0208	1.142	154.005	0	614	26.673	14.993	0.91	175.949	33881	1.136	0.88	0.919	1.64775
1328	CEP170_KAN619-5_4.tif:0002-0222	0.945	84.769	0	315	77.444	15.968	0.699	80.12	15428	1.781	0.562	0.835	0.750318
1329	CEP170_KAN619-5_4.tif:0003-0270	1.532	105.807	0	532	42.625	19.438	0.683	162.094	31213	2.115	0.473	0.866	1.518
1330	CEP170_KAN619-5_4.tif:0004-0472	1.21	83.266	0	306	72.114	33.983	0.747	100.752	19401	2.146	0.466	0.923	0.943539
1331	CEP170_KAN619-5_4.tif:0005-0702	1.376	140.642	0	547	64.556	50.612	0.833	193.549	37270	1.226	0.816	0.923	1.81257
1332	CEP170_KAN619-5_4.tif:0006-0716	1.241	170.452	0	690	45.3	51.64	0.811	211.558	40738	1.471	0.68	0.905	1.98123
1333	CEP170_KAN619-5_4.tif:0007-0771	1.189	138.336	0	473	16.983	55.583	0.814	164.514	31679	1.445	0.692	0.898	1.54066
1334	CEP170_KAN619-5_4.tif:0008-0933	1.179	125.467	0	560	68.756	67.22	0.9	147.906	28481	1.336	0.749	0.928	1.38513
1335	CEP170_KAN619-5_4.tif:0009-1093	0.592	107.439	0	271	34.34	78.746	0.932	63.606	12248	1.136	0.88	0.908	0.595664
1336	CEP170_KAN619-5_4.tif:0010-1259	0.919	126.446	0	345	76.134	90.715	0.909	116.228	22381	1.226	0.816	0.924	1.08847
1347	CEP170_KAN619-5_5.tif:0001-0083	1.288	110.129	0	406	82.826	5.98	0.81	141.835	27312	1.244	0.804	0.9	1.32828
1348	CEP170_KAN619-5_5.tif:0002-0238	0.867	105.024	0	282	61.186	17.2	0.884	91.083	17539	1.156	0.865	0.96	0.852984
1349	CEP170_KAN619-5_5.tif:0003-0383	0.852	152.36	0	539	41.698	27.611	0.925	129.761	24987	1.104	0.906	0.948	1.21521
1350	CEP170_KAN619-5_5.tif:0004-0529	1.34	157.407	0	642	73.608	38.076	0.805	210.899	40611	1.303	0.768	0.913	1.97506
1351	CEP170_KAN619-5_5.tif:0005-0533	0.566	132.798	0	358	56.236	38.433	0.971	75.171	14475	1.024	0.976	0.96	0.703971
1352	CEP170_KAN619-5_5.tif:0006-0699	0.919	120.079	0	413	6.608	50.401	0.885	110.375	21254	1.166	0.858	0.957	1.03366
1353	CEP170_KAN619-5_5.tif:0007-0754	0.779	133.92	0	469	33.943	54.329	0.854	104.32	20088	1.364	0.733	0.92	0.976951
1354	CEP170_KAN619-5_5.tif:0008-0904	1.049	154.931	0	549	15.019	65.154	0.92	162.525	31296	1.234	0.81	0.927	1.52204
1355	CEP170_KAN619-5_5.tif:0009-0910	0.701	132.97	0	463	71.542	65.582	0.919	93.222	17951	1.125	0.889	0.938	0.873021
1356	CEP170_KAN619-5_5.tif:0010-1221	1.096	109.024	0	538	55.935	88.041	0.834	119.463	23004	1.121	0.892	0.927	1.11877
1365	CEP170_KAN619-5_6.tif:0001-0035	0.649	135.232	0	477	1.127	2.548	0.86	87.785	16904	1.213	0.824	0.94	0.822102
1366	CEP170_KAN619-5_6.tif:0002-0268	0.826	123.629	0	363	46.644	19.354	0.875	102.082	19657	1.453	0.688	0.935	0.95599
1367	CEP170_KAN619-5_6.tif:0003-0336	0.711	110.314	0	288	62.918	24.253	0.821	78.484	15113	1.256	0.796	0.884	0.734999
1368	CEP170_KAN619-5_6.tif:0004-0369	0.893	136.692	0	473	13.036	26.61	0.884	122.096	23511	1.62	0.617	0.932	1.14342
1369	CEP170_KAN619-5_6.tif:0005-0514	0.556	104.822	0	275	69.521	37.049	0.859	58.246	11216	1.372	0.729	0.922	0.545474
1370	CEP170_KAN619-5_6.tif:0006-0616	1.142	121.064	0	468	65.682	44.452	0.873	138.314	26634	1.451	0.689	0.928	1.29531
1371	CEP170_KAN619-5_6.tif:0007-0682	0.654	123.913	0	377	22.579	49.176	0.932	81.081	15613	1.137	0.88	0.926	0.759316
1372	CEP170_KAN619-5_6.tif:0008-0952	0.55	118.075	0	338	22.558	68.591	0.944	64.997	12516	1.25	0.8	0.955	0.608698
										23073.6				1.12215
														0
														0
														0
1384	CEP170_KAN619-6_1.tif:0001-0151	0.857	136.279	0	464	83.672	10.896	0.886	116.773	22486	1.245	0.803	0.938	1.09357
1385	CEP170_KAN619-6_1.tif:0002-0176	0.748	122.847	0	332	39.272	12.728	0.958	91.867	17690	1.188	0.842	0.932	0.860327
1386	CEP170_KAN619-6_1.tif:0003-0177	1.08	124.942	0	625	43.668	12.735	0.745	134.96	25988	1.589	0.629	0.881	1.26389
1387	CEP170_KAN619-6_1.tif:0004-0392	0.722	6.935	0	36	83.845	28.31	0.754	5.006	964	1.755	0.57	0.894	0.0468827
1388	CEP170_KAN619-6_1.tif:0005-0419	1.023	84.036	0	318	67.805	30.184	0.735	85.973	16555	1.665	0.6	0.845	0.805128
1389	CEP170_KAN619-6_1.tif:0006-0427	0.592	120.886	0	310	32.917	30.792	0.889	71.567	13781	1.286	0.777	0.946	0.670219
1390	CEP170_KAN619-6_1.tif:0007-0489	0.945	76.324	0	280	15.516	35.212	0.741	72.138	13891	1.938	0.516	0.91	0.675569
1391	CEP170_KAN619-6_1.tif:0008-0588	0.525	3.327	0	19	75.803	42.406	0.857	1.745	336	1.628	0.614	0.985	0.0163409
1392	CEP170_KAN619-6_1.tif:0009-0940	1.246	83.871	0	393	36.408	67.75	0.808	104.533	20129	1.202	0.832	0.863	0.978945
1393	CEP170_KAN619-6_1.tif:0010-1122	1.08	88.851	0	324	49.88	80.813	0.884	95.975	18481	1.335	0.749	0.95	0.898797
1394	CEP170_KAN619-6_1.tif:0011-1175	0.608	123.205	0	330	7.553	84.714	0.886	74.859	14415	1.398	0.715	0.955	0.701053
1404	CEP170_KAN619-6_2.tif:0001-0075	0.919	137.254	0	407	21.131	5.363	0.931	126.162	24294	1.17	0.855	0.934	1.1815
1405	CEP170_KAN619-6_2.tif:0002-0259	1.309	128.468	0	503	38.464	18.65	0.758	168.123	32374	1.617	0.618	0.918	1.57446
1406	CEP170_KAN619-6_2.tif:0003-0320	0.821	120.646	0	365	83.182	23.081	0.82	98.992	19062	1.486	0.673	0.911	0.927053
1407	CEP170_KAN619-6_2.tif:0004-0500	0.836	166.366	0	690	7.147	36.039	0.931	139.098	26785	1.15	0.869	0.933	1.30265
1408	CEP170_KAN619-6_2.tif:0005-0650	1.314	104.739	0	431	58.303	46.889	0.82	137.613	26499	1.282	0.78	0.912	1.28874
1409	CEP170_KAN619-6_2.tif:0006-0802	0.815	129.089	0	448	11.221	57.829	0.927	105.25	20267	1.05	0.952	0.969	0.985656
1410	CEP170_KAN619-6_2.tif:0007-1030	0.852	135.128	0	482	75.751	74.278	0.804	115.085	22161	1.515	0.66	0.906	1.07777
1411	CEP170_KAN619-6_2.tif:0008-1101	1.387	83.479	0	355	48.524	79.374	0.789	115.75	22289	1.906	0.525	0.937	1.08399
1412	CEP170_KAN619-6_2.tif:0009-1197	1.117	86.74	0	424	66.707	86.311	0.818	96.847	18649	1.422	0.703	0.903	0.906967
1424	CEP170_KAN619-6_3.tif:0001-0183	1.049	225.381	0	875	24.943	13.182	0.869	236.428	45527	1.398	0.716	0.918	2.21414
1425	CEP170_KAN619-6_3.tif:0002-0193	1.007	131.649	0	496	58.426	13.923	0.835	132.633	25540	1.34	0.746	0.907	1.2421
1426	CEP170_KAN619-6_3.tif:0003-0370	0.878	110.195	0	281	33.78	26.669	0.868	96.712	18623	1.215	0.823	0.901	0.905703
1427	CEP170_KAN619-6_3.tif:0004-0382	1.148	115.109	0	388	79.895	27.59	0.884	132.108	25439	1.261	0.793	0.925	1.23719
1428	CEP170_KAN619-6_3.tif:0005-0563	0.888	96.228	0	331	64.93	40.569	0.819	85.453	16455	1.498	0.668	0.912	0.800265
1429	CEP170_KAN619-6_3.tif:0006-0609	0.805	89.026	0	213	6.366	43.908	0.767	71.66	13799	1.434	0.697	0.861	0.671094
1430	CEP170_KAN619-6_3.tif:0007-0644	0.919	130.124	0	484	40.96	46.361	0.829	119.609	23032	1.477	0.677	0.924	1.12013
1431	CEP170_KAN619-6_3.tif:0008-0696	0.966	102.962	0	430	0.836	50.185	0.852	99.454	19151	1.262	0.792	0.919	0.931381
1432	CEP170_KAN619-6_3.tif:0009-0945	0.582	110.661	0	216	48.274	68.145	0.985	64.364	12394	1.097	0.912	0.941	0.602764
1433	CEP170_KAN619-6_3.tif:0010-1131	0.904	112.81	0	305	68.438	81.578	0.853	101.936	19629	1.113	0.898	0.902	0.954628
1434	CEP170_KAN619-6_3.tif:0011-1153	0.795	132.124	0	391	0.545	83.109	0.842	104.979	20215	1.777	0.563	0.953	0.983127
1445	CEP170_KAN619-6_4.tif:0001-0044	0.54	91.885	0	192	9.284	3.187	0.956	49.626	9556	1.147	0.872	0.937	0.464742
1446	CEP170_KAN619-6_4.tif:0002-0131	1.049	134.54	0	385	34.777	9.439	0.769	141.134	27177	1.95	0.513	0.92	1.32171
1447	CEP170_KAN619-6_4.tif:0003-0142	0.893	140.343	0	394	89.025	10.252	0.936	125.357	24139	1.152	0.868	0.937	1.17397
1448	CEP170_KAN619-6_4.tif:0004-0512	0.769	129.405	0	368	45.957	36.892	0.887	99.459	19152	1.446	0.692	0.937	0.93143
1449	CEP170_KAN619-6_4.tif:0005-0672	0.961	139.238	0	485	7.665	48.403	0.814	133.77	25759	1.233	0.811	0.883	1.25275
1450	CEP170_KAN619-6_4.tif:0006-0747	0.852	81.805	0	302	24.531	53.809	0.793	69.671	13416	1.438	0.695	0.901	0.652468
1451	CEP170_KAN619-6_4.tif:0007-0763	1.101	147.17	0	590	51.665	55.019	0.807	162.026	31200	1.683	0.594	0.914	1.51737
1452	CEP170_KAN619-6_4.tif:0008-0887	0.826	81.025	0	299	72.61	63.937	0.833	66.903	12883	1.37	0.73	0.927	0.626546
1453	CEP170_KAN619-6_4.tif:0009-1127	0.878	119.136	0	338	8.525	81.248	0.898	104.559	20134	1.119	0.894	0.923	0.979188
1454	CEP170_KAN619-6_4.tif:0010-1216	0.815	158.624	0	629	89.722	87.618	0.843	129.33	24904	1.425	0.702	0.924	1.21117
1464	CEP170_KAN619-6_5.tif:0001-0130	1.241	138.778	0	589	33.966	9.379	0.833	172.246	33168	1.256	0.796	0.909	1.61308
1465	CEP170_KAN619-6_5.tif:0002-0135	1.168	88.351	0	261	67.012	9.687	0.677	103.235	19879	1.837	0.544	0.851	0.966786
1466	CEP170_KAN619-6_5.tif:0003-0175	0.67	110.767	0	232	54.611	12.634	0.868	74.205	14289	1.616	0.619	0.918	0.694925
1467	CEP170_KAN619-6_5.tif:0004-0478	0.675	134.823	0	473	83.279	34.497	0.92	91.02	17527	1.193	0.838	0.963	0.8524
1468	CEP170_KAN619-6_5.tif:0005-0727	0.904	150.184	0	609	6.688	52.426	0.882	135.707	26132	1.214	0.824	0.941	1.27089
1469	CEP170_KAN619-6_5.tif:0006-0788	1.049	115.104	0	391	50.258	56.818	0.869	120.746	23251	1.158	0.864	0.916	1.13078
1470	CEP170_KAN619-6_5.tif:0007-0801	0.571	131.718	0	396	26.585	57.767	0.922	75.244	14489	1.048	0.954	0.969	0.704651
1471	CEP170_KAN619-6_5.tif:0008-0922	1.132	87.133	0	444	3.229	66.431	0.781	98.644	18995	1.377	0.726	0.886	0.923794
1472	CEP170_KAN619-6_5.tif:0009-1066	0.821	126.019	0	351	49.591	76.848	0.947	103.401	19911	1.141	0.876	0.952	0.968343
1483	CEP170_KAN619-6_6.tif:0001-0208	1.397	117.357	0	679	26.457	15.097	0.73	163.942	31569	1.277	0.783	0.855	1.53531
1484	CEP170_KAN619-6_6.tif:0002-0207	0.519	113.28	0	250	90.57	14.96	0.919	58.828	11328	1.294	0.773	0.935	0.550921
1485	CEP170_KAN619-6_6.tif:0003-0322	0.743	120.14	0	429	71.573	23.171	0.768	89.218	17180	1.277	0.783	0.883	0.835524
1486	CEP170_KAN619-6_6.tif:0004-0444	0.706	123.316	0	450	42.822	31.991	0.794	87.094	16771	1.308	0.764	0.877	0.815633
1487	CEP170_KAN619-6_6.tif:0005-0755	0.53	128.304	0	355	68.424	54.403	0.95	67.963	13087	1.108	0.903	0.967	0.636467
1488	CEP170_KAN619-6_6.tif:0006-0772	0.904	123.667	0	350	37.072	55.563	0.853	111.746	21518	1.326	0.754	0.928	1.0465
1489	CEP170_KAN619-6_6.tif:0007-0811	0.701	120.511	0	292	7.543	58.423	0.861	84.487	16269	1.331	0.752	0.912	0.791219
1490	CEP170_KAN619-6_6.tif:0008-0889	0.862	138.831	0	447	80.557	64.078	0.833	119.681	23046	1.397	0.716	0.902	1.12081
1491	CEP170_KAN619-6_6.tif:0009-0899	0.592	6.667	0	27	45.109	64.815	0.839	3.947	760	1.689	0.592	0.954	0.0369615
1492	CEP170_KAN619-6_6.tif:0010-1026	1.158	81.937	0	379	47.835	73.955	0.722	94.889	18272	1.51	0.662	0.831	0.888632
1503	CEP170_KAN619-6_7.tif:0001-0083	0.571	117.573	0	300	48.371	6.014	0.967	67.163	12933	1.313	0.761	0.94	0.628978
1504	CEP170_KAN619-6_7.tif:0002-0107	0.862	142.181	0	507	2.732	7.679	0.959	122.569	23602	1.138	0.879	0.957	1.14785
1505	CEP170_KAN619-6_7.tif:0003-0145	1.065	130.351	0	480	62.31	10.48	0.765	138.771	26722	1.376	0.727	0.874	1.29959
1506	CEP170_KAN619-6_7.tif:0004-0178	1.148	117.706	0	439	36.269	12.828	0.741	135.089	26013	1.882	0.531	0.902	1.2651
1507	CEP170_KAN619-6_7.tif:0005-0347	1.091	121.91	0	398	38.218	25.064	0.848	132.95	25601	1.251	0.799	0.94	1.24507
1508	CEP170_KAN619-6_7.tif:0006-0606	0.966	95.409	0	280	51.154	43.669	0.729	92.158	17746	1.304	0.767	0.834	0.863051
1509	CEP170_KAN619-6_7.tif:0007-0808	0.753	122.255	0	350	24.487	58.26	0.856	92.059	17727	1.186	0.843	0.932	0.862127
1510	CEP170_KAN619-6_7.tif:0008-0864	0.789	118.691	0	316	43.351	62.334	0.888	93.69	18041	1.333	0.75	0.935	0.877398
1511	CEP170_KAN619-6_7.tif:0009-1061	0.831	93.806	0	306	0.749	76.507	0.701	77.944	15009	1.377	0.726	0.856	0.729941
1512	CEP170_KAN619-6_7.tif:0010-1140	0.68	126.061	0	363	74.041	82.199	0.814	85.76	16514	1.031	0.97	0.888	0.803134
1521	CEP170_KAN619-6_8.tif:0001-0217	0.888	62.216	0	240	63.87	15.664	0.749	55.25	10639	1.998	0.5	0.907	0.517412
1522	CEP170_KAN619-6_8.tif:0002-0301	0.618	122.773	0	334	9.91	21.689	0.956	75.872	14610	1.105	0.905	0.96	0.710536
1523	CEP170_KAN619-6_8.tif:0003-0460	0.696	122.791	0	381	35.441	33.145	0.888	85.448	16454	1.136	0.88	0.934	0.800216
1524	CEP170_KAN619-6_8.tif:0004-0739	0.654	119.611	0	367	86.346	53.282	0.835	78.266	15071	1.243	0.805	0.916	0.732956
1525	CEP170_KAN619-6_8.tif:0005-0848	1.091	103.171	0	388	47.198	61.19	0.799	112.515	21666	1.382	0.724	0.894	1.05369
1526	CEP170_KAN619-6_8.tif:0006-0912	0.81	106.071	0	332	27.082	65.726	0.902	85.931	16547	1.082	0.924	0.92	0.804739
1527	CEP170_KAN619-6_8.tif:0007-0991	0.758	84.295	0	342	54.823	71.527	0.69	63.912	12307	1.463	0.683	0.832	0.598533
1528	CEP170_KAN619-6_8.tif:0008-1098	0.872	120.22	0	357	49.346	79.144	0.872	104.886	20197	1.122	0.891	0.913	0.982252
										19359.7				0.941533
														0
														0
														0
1541	CEP170_KAN619-7_1.tif:0001-0048	0.961	100.746	0	393	39.687	3.488	0.839	96.79	18638	1.277	0.783	0.92	0.906432
1542	CEP170_KAN619-7_1.tif:0002-0194	0.696	125.052	0	353	4.584	13.999	0.888	87.022	16757	1.404	0.712	0.954	0.814952
1543	CEP170_KAN619-7_1.tif:0003-0380	0.763	112.272	0	275	24.7	27.456	0.77	85.708	16504	1.334	0.75	0.894	0.802648
1544	CEP170_KAN619-7_1.tif:0004-0429	0.852	121.598	0	337	76.419	30.939	0.893	103.562	19942	1.4	0.714	0.924	0.96985
1545	CEP170_KAN619-7_1.tif:0005-0534	1.174	114.823	0	502	56.738	38.498	0.853	134.762	25950	1.299	0.77	0.908	1.26204
1546	CEP170_KAN619-7_1.tif:0006-0581	0.758	166.5	0	664	12.806	41.903	0.921	126.24	24309	1.154	0.867	0.927	1.18223
1547	CEP170_KAN619-7_1.tif:0007-0654	1.059	99.475	0	403	71.016	47.065	0.74	105.385	20293	1.659	0.603	0.883	0.986921
1548	CEP170_KAN619-7_1.tif:0008-0661	0.93	93.33	0	245	36.417	47.649	0.77	86.757	16706	1.516	0.66	0.867	0.812472
1549	CEP170_KAN619-7_1.tif:0009-0865	0.691	111.865	0	307	22.661	62.362	0.805	77.264	14878	1.374	0.728	0.89	0.72357
1550	CEP170_KAN619-7_1.tif:0010-0884	0.919	132.768	0	429	36.807	63.765	0.84	122.039	23500	1.267	0.789	0.917	1.14289
1551	CEP170_KAN619-7_1.tif:0011-1185	0.857	108.042	0	371	73.294	85.419	0.877	92.578	17827	1.193	0.838	0.912	0.86699
1552	CEP170_KAN619-7_1.tif:0012-1201	0.784	106.364	0	405	62.908	86.555	0.791	83.407	16061	1.118	0.895	0.888	0.781103
1563	CEP170_KAN619-7_2.tif:0001-0122	1.2	123.355	0	555	33.044	8.731	0.796	147.979	28495	1.319	0.758	0.922	1.38581
1564	CEP170_KAN619-7_2.tif:0002-0394	0.675	141.146	0	448	21.436	28.431	0.946	95.289	18349	1.17	0.855	0.963	0.892377
1565	CEP170_KAN619-7_2.tif:0003-0587	1.018	134.454	0	448	75.821	42.304	0.87	136.855	26353	1.206	0.829	0.92	1.28164
1566	CEP170_KAN619-7_2.tif:0004-0614	0.976	137.686	0	532	51.364	44.301	0.889	134.425	25885	1.416	0.706	0.967	1.25888
1567	CEP170_KAN619-7_2.tif:0005-0697	0.831	110.425	0	329	57.89	50.208	0.859	91.753	17668	1.374	0.728	0.933	0.859258
1568	CEP170_KAN619-7_2.tif:0006-0841	0.846	111.442	0	341	24.735	60.628	0.866	94.334	18165	1.209	0.827	0.911	0.883428
1569	CEP170_KAN619-7_2.tif:0007-0882	1.117	133.07	0	496	80.14	63.54	0.764	148.576	28610	2.039	0.49	0.901	1.39141
1570	CEP170_KAN619-7_2.tif:0008-0979	0.898	103.775	0	283	12.619	70.517	0.729	93.233	17953	1.342	0.745	0.854	0.873118
1571	CEP170_KAN619-7_2.tif:0009-1229	1.007	171.902	0	644	90.871	88.534	0.942	173.186	33349	1.131	0.884	0.949	1.62188
1572	CEP170_KAN619-7_2.tif:0010-1241	0.8	136.221	0	568	22.308	89.444	0.868	108.942	20978	1.407	0.711	0.919	1.02023
1582	CEP170_KAN619-7_3.tif:0001-0010	0.576	122.847	0	290	20.553	0.734	0.891	70.814	13636	1.152	0.868	0.929	0.663167
1583	CEP170_KAN619-7_3.tif:0002-0018	0.924	87.421	0	353	64.826	1.309	0.773	80.811	15561	1.506	0.664	0.875	0.756787
1584	CEP170_KAN619-7_3.tif:0003-0032	1.096	115.052	0	357	40.307	2.311	0.889	126.069	24276	1.259	0.794	0.94	1.18063
1585	CEP170_KAN619-7_3.tif:0004-0434	0.582	84.259	0	282	19.917	31.324	0.815	49.008	9437	1.649	0.606	0.907	0.458955
1586	CEP170_KAN619-7_3.tif:0005-0528	1.007	101.402	0	343	66.411	38.089	0.817	102.16	19672	1.499	0.667	0.902	0.956719
1587	CEP170_KAN619-7_3.tif:0006-0847	1.293	115.249	0	537	61.394	61.03	0.885	149.028	28697	1.433	0.698	0.938	1.39564
1588	CEP170_KAN619-7_3.tif:0007-0858	0.696	114.739	0	319	54.094	61.855	0.888	79.845	15375	1.076	0.93	0.94	0.747741
1589	CEP170_KAN619-7_3.tif:0008-1122	0.956	87.804	0	406	35.283	80.869	0.775	83.9	16156	1.691	0.591	0.88	0.785724
1590	CEP170_KAN619-7_3.tif:0009-1217	0.821	110.924	0	265	15.401	87.679	0.891	91.015	17526	1.187	0.843	0.913	0.852352
1600	CEP170_KAN619-7_4.tif:0001-0247	1.08	166.904	0	675	42.505	17.808	0.857	180.285	34716	1.249	0.8	0.933	1.68836
1601	CEP170_KAN619-7_4.tif:0002-0537	0.95	82.24	0	264	31.592	38.79	0.709	78.157	15050	1.202	0.832	0.851	0.731935
1602	CEP170_KAN619-7_4.tif:0003-0630	1.137	119.187	0	487	84.758	45.394	0.807	135.552	26102	1.776	0.563	0.952	1.26943
1603	CEP170_KAN619-7_4.tif:0004-0661	0.909	106.617	0	371	49.055	47.645	0.831	96.894	18658	1.484	0.674	0.882	0.907405
1604	CEP170_KAN619-7_4.tif:0005-0735	1.371	108.955	0	411	78.146	52.955	0.717	149.376	28764	1.988	0.503	0.892	1.3989
1605	CEP170_KAN619-7_4.tif:0006-0918	0.582	140.732	0	457	7.24	66.181	0.938	81.854	15762	1.059	0.944	0.966	0.766562
1606	CEP170_KAN619-7_4.tif:0007-0991	1.007	109.119	0	423	35.865	71.405	0.8	109.934	21169	1.436	0.696	0.907	1.02952
1607	CEP170_KAN619-7_4.tif:0008-1030	0.525	112.168	0	286	72.103	74.271	0.959	58.833	11329	1.272	0.786	0.935	0.550969
1608	CEP170_KAN619-7_4.tif:0009-1185	1.002	120.813	0	363	45.891	85.408	0.868	121.089	23317	1.598	0.626	0.915	1.13399
1619	CEP170_KAN619-7_5.tif:0001-0239	1.283	89.887	0	512	42.582	17.181	0.682	115.298	22202	2.066	0.484	0.856	1.07976
1620	CEP170_KAN619-7_5.tif:0002-0346	0.919	106.678	0	222	5.728	24.913	0.73	98.057	18882	1.61	0.621	0.87	0.918299
1621	CEP170_KAN619-7_5.tif:0003-0398	0.654	118.317	0	319	81.946	28.625	0.881	77.419	14908	1.295	0.772	0.94	0.725029
1622	CEP170_KAN619-7_5.tif:0004-0399	1.127	108.198	0	474	75.475	28.716	0.809	121.93	23479	1.756	0.569	0.927	1.14187
1623	CEP170_KAN619-7_5.tif:0005-0463	0.893	140.785	0	396	38.366	33.376	0.884	125.752	24215	1.253	0.798	0.901	1.17766
1624	CEP170_KAN619-7_5.tif:0006-0695	1.651	126.236	0	546	50.504	50.196	0.79	208.468	40143	1.243	0.804	0.898	1.9523
1625	CEP170_KAN619-7_5.tif:0007-0770	1.724	111.889	0	663	85.451	55.521	0.695	192.91	37147	2.222	0.45	0.897	1.80659
1626	CEP170_KAN619-7_5.tif:0008-0911	0.805	115.748	0	365	32.807	65.668	0.883	93.17	17941	1.246	0.803	0.937	0.872535
1627	CEP170_KAN619-7_5.tif:0009-1149	0.68	108.962	0	367	12	82.832	0.814	74.127	14274	1.117	0.895	0.897	0.694195
1628	CEP170_KAN619-7_5.tif:0010-1203	1.127	80.092	0	315	54.379	86.657	0.69	90.257	17380	1.582	0.632	0.849	0.845251
1639	CEP170_KAN619-7_6.tif:0001-0144	1.397	109.26	0	406	82.063	10.363	0.703	152.632	29391	1.973	0.507	0.862	1.42939
1640	CEP170_KAN619-7_6.tif:0002-0337	1.246	139.733	0	556	38.731	24.278	0.814	174.157	33536	1.598	0.626	0.899	1.63097
1641	CEP170_KAN619-7_6.tif:0003-0358	0.971	121.011	0	407	75.128	25.795	0.848	117.516	22629	1.415	0.707	0.901	1.10053
1642	CEP170_KAN619-7_6.tif:0004-0441	0.665	123.406	0	328	14.387	31.781	0.921	82.031	15796	1.293	0.773	0.931	0.768216
1643	CEP170_KAN619-7_6.tif:0005-0487	0.898	79.225	0	341	50.587	35.091	0.885	71.177	13706	1.378	0.725	0.953	0.666571
1644	CEP170_KAN619-7_6.tif:0006-0752	0.639	91.797	0	250	4.157	54.214	0.885	58.636	11291	1.145	0.873	0.901	0.549121
1645	CEP170_KAN619-7_6.tif:0007-0824	0.94	110.646	0	447	42.274	59.355	0.896	104.003	20027	1.107	0.903	0.94	0.973984
1646	CEP170_KAN619-7_6.tif:0008-0953	0.53	105.294	0	230	80.507	68.674	0.751	55.774	10740	2.001	0.5	0.923	0.522324
1647	CEP170_KAN619-7_6.tif:0009-1047	0.55	119.33	0	378	54.842	75.426	0.888	65.688	12649	1.217	0.821	0.946	0.615166
1648	CEP170_KAN619-7_6.tif:0010-1126	0.841	108.938	0	283	20.545	81.157	0.813	91.649	17648	1.644	0.608	0.908	0.858285
										20672.6				1.00538
														0
														0
														0
1658	CEP170_KAN619-8_1.tif:0001-0050	1.252	95.693	0	386	34.434	3.628	0.752	119.764	23062	1.606	0.623	0.884	1.12159
1659	CEP170_KAN619-8_1.tif:0002-0382	1.023	157.497	0	477	37.674	27.525	0.848	161.128	31027	1.123	0.89	0.906	1.50895
1660	CEP170_KAN619-8_1.tif:0003-0409	1.117	114.851	0	373	43.601	29.475	0.802	128.234	24693	1.657	0.603	0.905	1.20091
1661	CEP170_KAN619-8_1.tif:0004-0409	0.53	105.627	0	278	16.377	29.493	0.909	55.951	10774	1.233	0.811	0.932	0.523978
1662	CEP170_KAN619-8_1.tif:0005-0423	0.888	126.526	0	350	73.526	30.505	0.819	112.359	21636	1.128	0.886	0.893	1.05224
1663	CEP170_KAN619-8_1.tif:0006-0747	0.67	136.287	0	494	6.036	53.832	0.954	91.301	17581	1.211	0.826	0.931	0.855026
1664	CEP170_KAN619-8_1.tif:0007-0812	0.55	124.057	0	359	72.617	58.56	1	68.29	13150	1.092	0.916	0.955	0.639531
1665	CEP170_KAN619-8_1.tif:0008-0931	0.706	132.324	0	420	40.256	67.111	0.891	93.456	17996	1.264	0.791	0.932	0.875209
1666	CEP170_KAN619-8_1.tif:0009-1023	0.841	86.698	0	272	25.676	73.671	0.861	72.938	14045	1.315	0.761	0.918	0.683058
1674	CEP170_KAN619-8_2.tif:0001-0302	0.727	98.836	0	250	51.709	21.775	0.87	71.858	13837	1.202	0.832	0.921	0.672942
1675	CEP170_KAN619-8_2.tif:0002-0426	1.007	157.454	0	543	85.758	30.678	0.955	158.63	30546	1.021	0.98	0.913	1.48556
1676	CEP170_KAN619-8_2.tif:0003-0524	0.592	107.088	0	247	28.406	37.773	0.785	63.398	12208	1.798	0.556	0.923	0.593718
1677	CEP170_KAN619-8_2.tif:0004-0646	1.018	135.74	0	626	44.714	46.563	0.87	138.164	26605	1.319	0.758	0.931	1.2939
1678	CEP170_KAN619-8_2.tif:0005-0854	0.737	106.599	0	304	11.37	61.568	0.882	78.609	15137	1.307	0.765	0.931	0.736166
1679	CEP170_KAN619-8_2.tif:0006-0950	1.49	127.906	0	511	65.462	68.477	0.725	190.635	36709	1.834	0.545	0.874	1.78529
1680	CEP170_KAN619-8_2.tif:0007-1080	0.639	120.821	0	337	28.275	77.889	0.91	77.175	14861	1.354	0.739	0.925	0.722743
1687	CEP170_KAN619-8_3.tif:0001-0232	0.602	123.845	0	395	79.158	16.775	0.905	74.605	14366	1.187	0.843	0.955	0.69867
1688	CEP170_KAN619-8_3.tif:0002-0262	0.94	168.249	0	623	36.411	18.906	0.867	158.147	30453	1.059	0.945	0.921	1.48104
1689	CEP170_KAN619-8_3.tif:0003-0586	0.654	113.833	0	356	32.509	42.273	0.881	74.485	14343	1.398	0.715	0.926	0.697551
1690	CEP170_KAN619-8_3.tif:0004-0768	0.576	141.91	0	547	8.701	55.366	0.959	81.802	15752	1.107	0.903	0.969	0.766076
1691	CEP170_KAN619-8_3.tif:0005-0830	0.691	140.226	0	468	31.343	59.842	0.93	96.852	18650	1.088	0.919	0.937	0.907016
1692	CEP170_KAN619-8_3.tif:0006-0945	0.623	128.783	0	405	65.954	68.112	0.936	80.255	15454	1.093	0.914	0.96	0.751583
1702	CEP170_KAN619-8_4.tif:0001-0148	0.924	85.837	0	265	72.249	10.616	0.656	79.346	15279	1.701	0.588	0.828	0.743072
1703	CEP170_KAN619-8_4.tif:0002-0293	0.66	130.669	0	353	17.209	21.108	0.874	86.18	16595	1.462	0.684	0.955	0.807074
1704	CEP170_KAN619-8_4.tif:0003-0433	0.53	95.951	0	270	52.996	31.223	0.795	50.825	9787	1.552	0.645	0.876	0.475977
1705	CEP170_KAN619-8_4.tif:0004-0476	0.743	120.273	0	309	27.483	34.354	0.937	89.317	17199	1.051	0.952	0.944	0.836448
1706	CEP170_KAN619-8_4.tif:0005-0524	0.898	105.717	0	370	41.165	37.723	0.81	94.977	18289	1.478	0.676	0.901	0.889459
1707	CEP170_KAN619-8_4.tif:0006-0680	0.841	125.481	0	436	83.781	49.009	0.891	105.566	20328	1.186	0.844	0.928	0.988623
1708	CEP170_KAN619-8_4.tif:0007-0920	0.997	115.943	0	446	39.537	66.295	0.954	115.605	22261	1.127	0.887	0.932	1.08263
1709	CEP170_KAN619-8_4.tif:0008-1054	0.997	83.198	0	252	16.884	75.986	0.816	82.955	15974	1.649	0.607	0.937	0.776872
1710	CEP170_KAN619-8_4.tif:0009-1187	0.613	99.432	0	212	53.908	85.586	0.812	60.931	11733	1.462	0.684	0.918	0.570617
1721	CEP170_KAN619-8_5.tif:0001-0296	0.961	108.822	0	403	81.229	21.349	0.847	104.548	20132	1.13	0.885	0.925	0.979091
1722	CEP170_KAN619-8_5.tif:0002-0321	0.66	124.252	0	382	44.912	23.157	0.913	81.948	15780	1.117	0.895	0.924	0.767437
1723	CEP170_KAN619-8_5.tif:0003-0337	0.909	127.937	0	438	18.016	24.362	0.838	116.269	22389	1.416	0.706	0.916	1.08886
1724	CEP170_KAN619-8_5.tif:0004-0557	0.94	124.006	0	319	74.005	40.134	0.917	116.56	22445	1.161	0.862	0.955	1.09158
1725	CEP170_KAN619-8_5.tif:0005-0706	0.982	120.259	0	371	6.057	50.911	0.839	118.035	22729	1.398	0.715	0.911	1.10539
1726	CEP170_KAN619-8_5.tif:0006-0839	1.142	100.332	0	362	46.401	60.448	0.738	114.628	22073	1.761	0.568	0.894	1.07349
1727	CEP170_KAN619-8_5.tif:0007-0841	1.065	161.634	0	530	68.77	60.606	0.83	172.075	33135	1.341	0.746	0.901	1.61147
1728	CEP170_KAN619-8_5.tif:0008-0932	0.779	89.64	0	263	8.339	67.121	0.709	69.827	13446	1.758	0.569	0.847	0.653927
1729	CEP170_KAN619-8_5.tif:0009-1120	0.576	113.378	0	322	30.122	80.754	0.947	65.356	12585	1.171	0.854	0.933	0.612053
1730	CEP170_KAN619-8_5.tif:0010-1272	0.618	144.697	0	436	59.358	91.677	0.902	89.421	17219	1.349	0.741	0.96	0.837421
1739	CEP170_KAN619-8_6.tif:0001-0392	0.81	120.788	0	321	46.021	28.294	0.79	97.854	18843	1.63	0.614	0.91	0.916402
1740	CEP170_KAN619-8_6.tif:0002-0412	0.634	122.328	0	386	65.781	29.734	0.863	77.503	14924	1.252	0.798	0.942	0.725807
1741	CEP170_KAN619-8_6.tif:0003-0430	0.748	113.208	0	307	72.274	30.998	0.895	84.659	16302	1.277	0.783	0.944	0.792824
1742	CEP170_KAN619-8_6.tif:0004-0622	0.701	123.356	0	340	22.378	44.838	0.894	86.481	16653	1.33	0.752	0.947	0.809894
1743	CEP170_KAN619-8_6.tif:0005-0753	1.194	121.309	0	414	57.043	54.287	0.78	144.894	27901	1.251	0.799	0.883	1.35692
1744	CEP170_KAN619-8_6.tif:0006-0794	0.753	147.69	0	493	45.802	57.23	0.925	111.211	21415	1.169	0.856	0.951	1.04149
1745	CEP170_KAN619-8_6.tif:0007-0986	0.898	102.879	0	334	81.041	71.116	0.713	92.428	17798	1.75	0.572	0.869	0.86558
1746	CEP170_KAN619-8_6.tif:0008-1005	0.924	137.051	0	400	31.831	72.424	0.893	126.687	24395	1.325	0.755	0.927	1.18642
										19193.8				0.93346
														0
														0
														0
1756	CEP170_KAN619-9_1.tif:0001-0038	1.252	151.033	0	525	35.696	2.737	0.802	189.025	36399	1.533	0.652	0.904	1.77021
1757	CEP170_KAN619-9_1.tif:0002-0191	1.132	142.812	0	621	28.106	13.75	0.891	161.678	31133	1.238	0.808	0.938	1.51411
1758	CEP170_KAN619-9_1.tif:0003-0244	1.241	113.31	0	417	20.589	17.616	0.82	140.636	27081	1.653	0.605	0.905	1.31705
1759	CEP170_KAN619-9_1.tif:0004-0333	0.602	123.069	0	367	73.141	23.988	0.92	74.137	14276	1.202	0.832	0.921	0.694293
1760	CEP170_KAN619-9_1.tif:0005-0546	0.914	95.381	0	386	27.656	39.313	0.871	87.177	16787	1.621	0.617	0.97	0.816411
1761	CEP170_KAN619-9_1.tif:0006-0814	1.142	137.8	0	457	85.675	58.653	0.821	157.435	30316	1.446	0.691	0.911	1.47437
1762	CEP170_KAN619-9_1.tif:0007-0836	0.935	136.606	0	586	42.422	60.235	0.912	127.694	24589	1.39	0.719	0.95	1.19585
1763	CEP170_KAN619-9_1.tif:0008-1052	0.914	125.023	0	377	42.657	75.889	0.799	114.27	22004	1.698	0.589	0.903	1.07013
1764	CEP170_KAN619-9_1.tif:0009-1219	0.628	79.876	0	280	34.366	87.8	0.801	50.192	9665	1.357	0.737	0.9	0.470043
1771	CEP170_KAN619-9_2.tif:0001-0023	1.303	94.725	0	396	35.535	1.676	0.721	123.472	23776	2.131	0.469	0.949	1.15631
1772	CEP170_KAN619-9_2.tif:0002-0723	1.127	128.161	0	446	67.319	52.185	0.826	144.427	27811	1.281	0.781	0.91	1.35255
1773	CEP170_KAN619-9_2.tif:0003-0737	0.956	105.228	0	380	30.985	53.115	0.817	100.55	19362	1.393	0.718	0.904	0.941643
1774	CEP170_KAN619-9_2.tif:0004-1030	0.821	97.627	0	350	68.473	74.286	0.913	80.104	15425	1.143	0.875	0.924	0.750172
1775	CEP170_KAN619-9_2.tif:0005-1049	0.94	92.337	0	444	33.966	75.554	0.867	86.793	16713	1.608	0.622	0.938	0.812813
1776	CEP170_KAN619-9_2.tif:0006-1250	0.675	104.3	0	319	80.837	90.114	0.829	70.414	13559	1.535	0.652	0.897	0.659422
1786	CEP170_KAN619-9_3.tif:0001-0129	0.701	75.022	0	217	11.092	9.355	0.725	52.596	10128	1.586	0.631	0.846	0.492561
1787	CEP170_KAN619-9_3.tif:0002-0263	1.137	115.114	0	522	19.61	18.958	0.77	130.919	25210	1.794	0.557	0.912	1.22605
1788	CEP170_KAN619-9_3.tif:0003-0320	1.117	117.781	0	378	41.982	23.046	0.795	131.506	25323	1.616	0.619	0.907	1.23155
1789	CEP170_KAN619-9_3.tif:0004-0446	1.397	79.089	0	425	72.186	32.12	0.781	110.484	21275	2.122	0.471	0.961	1.03468
1790	CEP170_KAN619-9_3.tif:0005-0516	0.545	120.724	0	332	7.522	37.21	0.935	65.828	12676	1.116	0.896	0.946	0.616479
1791	CEP170_KAN619-9_3.tif:0006-0658	1.106	81.671	0	308	36.676	47.497	0.728	90.34	17396	1.552	0.644	0.877	0.846029
1792	CEP170_KAN619-9_3.tif:0007-0806	0.992	109.466	0	410	81.79	58.102	0.829	108.578	20908	1.665	0.601	0.929	1.01683
1793	CEP170_KAN619-9_3.tif:0008-0906	0.841	121.414	0	395	32.653	65.278	0.882	102.144	19669	1.287	0.777	0.915	0.956573
1794	CEP170_KAN619-9_3.tif:0009-1090	0.846	95.104	0	290	73.242	78.57	0.875	80.504	15502	1.303	0.767	0.921	0.753917
1803	CEP170_KAN619-9_4.tif:0001-0099	1.122	104.565	0	278	42.521	7.184	0.7	117.292	22586	2.158	0.463	0.85	1.09844
1804	CEP170_KAN619-9_4.tif:0002-0194	0.602	107.078	0	206	65.244	13.975	0.96	64.504	12421	1.058	0.945	0.943	0.604077
1805	CEP170_KAN619-9_4.tif:0003-0404	0.81	106.083	0	416	28.873	29.115	0.837	85.941	16549	1.628	0.614	0.937	0.804837
1806	CEP170_KAN619-9_4.tif:0004-0427	1.329	106.605	0	335	84.579	30.697	0.732	141.726	27291	1.889	0.529	0.868	1.32726
1807	CEP170_KAN619-9_4.tif:0005-0531	1.028	83.985	0	318	58.185	38.205	0.852	86.357	16629	1.365	0.733	0.917	0.808727
1808	CEP170_KAN619-9_4.tif:0006-0847	0.997	117.156	0	392	41.152	61.019	0.775	116.815	22494	1.867	0.536	0.908	1.09396
1809	CEP170_KAN619-9_4.tif:0007-0872	0.576	103.622	0	241	12.088	62.861	0.935	59.732	11502	1.421	0.704	0.921	0.559383
1810	CEP170_KAN619-9_4.tif:0008-0999	0.93	102.777	0	425	26.783	71.983	0.794	95.538	18397	1.68	0.595	0.906	0.894711
1823	CEP170_KAN619-9_5.tif:0001-0020	0.862	133.343	0	461	25.451	1.448	0.922	114.95	22135	1.121	0.892	0.971	1.0765
1824	CEP170_KAN619-9_5.tif:0002-0283	1.231	141.405	0	500	9.012	20.372	0.82	174.038	33513	1.349	0.741	0.898	1.62986
1825	CEP170_KAN619-9_5.tif:0003-0320	0.701	113.311	0	342	24.378	23.105	0.839	79.44	15297	1.465	0.683	0.925	0.743947
1826	CEP170_KAN619-9_5.tif:0004-0413	0.763	169.571	0	657	72.584	29.762	0.938	129.45	24927	1.243	0.805	0.958	1.21229
1827	CEP170_KAN619-9_5.tif:0005-0504	0.805	112.671	0	344	74.537	36.291	0.896	90.693	17464	1.175	0.851	0.925	0.849336
1828	CEP170_KAN619-9_5.tif:0006-0542	0.727	110.35	0	258	56.49	39.051	0.893	80.229	15449	1.183	0.846	0.933	0.75134
1829	CEP170_KAN619-9_5.tif:0007-0695	0.722	104.187	0	230	19.247	50.058	0.812	75.207	14482	1.759	0.569	0.924	0.704311
1830	CEP170_KAN619-9_5.tif:0008-0861	0.867	141.269	0	423	74.432	62.077	0.941	122.517	23592	1.223	0.817	0.963	1.14736
1831	CEP170_KAN619-9_5.tif:0009-0870	1.018	100.765	0	408	38.012	62.694	0.791	102.565	19750	1.332	0.751	0.885	0.960513
1832	CEP170_KAN619-9_5.tif:0010-1020	0.54	107.606	0	281	1.957	73.526	0.898	58.117	11191	1.208	0.828	0.945	0.544258
1833	CEP170_KAN619-9_5.tif:0011-1080	0.857	120.248	0	325	48.125	77.843	0.856	103.037	19841	1.338	0.747	0.909	0.964938
1834	CEP170_KAN619-9_5.tif:0012-1253	0.571	82.645	0	182	23.931	90.28	0.778	47.211	9091	1.284	0.779	0.891	0.442128
1845	CEP170_KAN619-9_6.tif:0001-0051	0.582	114.643	0	332	8.863	3.7	0.927	66.68	12840	1.322	0.757	0.941	0.624455
1846	CEP170_KAN619-9_6.tif:0002-0270	0.597	117.104	0	303	16.374	19.498	0.924	69.936	13467	1.156	0.865	0.947	0.654948
1847	CEP170_KAN619-9_6.tif:0003-0367	0.971	105.904	0	501	77.436	26.476	0.819	102.845	19804	1.783	0.561	0.959	0.963139
1848	CEP170_KAN619-9_6.tif:0004-0395	0.805	117.032	0	344	33.169	28.507	0.905	94.204	18140	1.127	0.887	0.939	0.882213
1849	CEP170_KAN619-9_6.tif:0005-0626	0.8	93.149	0	274	45.414	45.117	0.807	74.496	14345	1.278	0.782	0.914	0.697648
1850	CEP170_KAN619-9_6.tif:0006-0688	0.748	131.104	0	377	8.87	49.595	0.919	98.041	18879	1.198	0.835	0.944	0.918153
1851	CEP170_KAN619-9_6.tif:0007-0771	0.623	103.467	0	230	62.115	55.617	0.839	64.478	12416	1.306	0.766	0.889	0.603834
1852	CEP170_KAN619-9_6.tif:0008-0801	0.961	96.676	0	256	34.223	57.758	0.878	92.879	17885	1.186	0.843	0.902	0.869811
1853	CEP170_KAN619-9_6.tif:0009-0982	0.711	106.248	0	245	66.885	70.768	0.851	75.591	14556	1.36	0.735	0.923	0.70791
1854	CEP170_KAN619-9_6.tif:0010-1265	0.727	99.757	0	269	91.544	91.207	0.848	72.527	13966	1.403	0.713	0.924	0.679216
										19034.9				0.925732
														0
														0
														0
8	CEP170_KAN619-10_1.tif:0001-0196	1.226	100	0	416	72.739	14.132	0.856	122.558	23600	1.482	0.675	0.918	1.14775
9	CEP170_KAN619-10_1.tif:0002-0286	1.065	143.38	0	512	31.153	20.647	0.845	152.642	29393	1.184	0.845	0.928	1.42949
10	CEP170_KAN619-10_1.tif:0003-0433	1.013	106.344	0	433	8.448	31.237	0.85	107.69	20737	1.077	0.929	0.892	1.00851
11	CEP170_KAN619-10_1.tif:0004-0496	0.815	114.955	0	534	54.466	35.807	0.917	93.726	18048	1.079	0.927	0.946	0.877738
12	CEP170_KAN619-10_1.tif:0005-0828	0.846	126.399	0	425	47.498	59.646	0.854	106.994	20603	1.178	0.849	0.926	1.002
13	CEP170_KAN619-10_1.tif:0006-0844	0.857	116.158	0	418	13.466	60.85	0.873	99.532	19166	1.234	0.81	0.957	0.932111
14	CEP170_KAN619-10_1.tif:0007-1209	1.101	136.344	0	372	65.339	87.127	0.859	150.108	28905	1.41	0.709	0.904	1.40575
26	CEP170_KAN619-10_2.tif:0001-0056	0.758	139.671	0	432	44.087	4.085	0.907	105.899	20392	1.013	0.988	0.945	0.991735
27	CEP170_KAN619-10_2.tif:0002-0122	0.623	100.392	0	329	78.949	8.764	0.898	62.562	12047	1.172	0.853	0.93	0.585888
28	CEP170_KAN619-10_2.tif:0003-0299	1.163	147.183	0	571	32.456	21.546	0.822	171.213	32969	1.275	0.784	0.882	1.6034
29	CEP170_KAN619-10_2.tif:0004-0470	0.992	119.597	0	341	37.771	33.91	0.797	118.627	22843	1.822	0.549	0.905	1.11094
30	CEP170_KAN619-10_2.tif:0005-0547	0.982	111.169	0	411	9.011	39.434	0.779	109.113	21011	1.542	0.648	0.889	1.02184
31	CEP170_KAN619-10_2.tif:0006-0550	1.231	137.857	0	632	62.354	39.62	0.842	169.67	32672	1.404	0.712	0.926	1.58896
32	CEP170_KAN619-10_2.tif:0007-0765	0.608	100.248	0	229	6.375	55.17	0.805	60.91	11729	1.531	0.653	0.921	0.570423
33	CEP170_KAN619-10_2.tif:0008-0807	1.241	140.456	0	458	62.389	58.166	0.817	174.329	33569	1.441	0.694	0.907	1.63258
34	CEP170_KAN619-10_2.tif:0009-1031	1.054	128.369	0	441	39.654	74.331	0.829	135.328	26059	1.361	0.735	0.894	1.26734
35	CEP170_KAN619-10_2.tif:0010-1103	0.665	111.875	0	292	12.218	79.485	0.921	74.366	14320	1.409	0.71	0.945	0.696432
36	CEP170_KAN619-10_2.tif:0011-1150	1.215	138.979	0	511	64.618	82.872	0.816	168.886	32521	1.708	0.585	0.927	1.58161
44	CEP170_KAN619-10_3.tif:0001-0175	1.101	98.311	0	330	42.969	12.565	0.731	108.236	20842	1.48	0.675	0.865	1.01362
45	CEP170_KAN619-10_3.tif:0002-0231	1.278	125.411	0	477	29.939	16.66	0.851	160.214	30851	1.398	0.715	0.921	1.50039
46	CEP170_KAN619-10_3.tif:0003-0460	0.644	127.21	0	360	67.037	33.127	0.928	81.917	15774	1.011	0.989	0.947	0.767146
47	CEP170_KAN619-10_3.tif:0004-0689	1.226	105.195	0	376	21.306	49.611	0.77	128.925	24826	1.077	0.928	0.897	1.20738
48	CEP170_KAN619-10_3.tif:0005-0786	1.506	108.31	0	504	59.299	56.584	0.726	163.117	31410	1.98	0.505	0.879	1.52758
49	CEP170_KAN619-10_3.tif:0006-0990	1.329	106.371	0	521	26.841	71.428	0.776	141.415	27231	1.865	0.536	0.936	1.32434
50	CEP170_KAN619-10_3.tif:0007-1103	1.262	74.823	0	426	57.457	79.497	0.764	94.422	18182	2.055	0.487	0.933	0.884255
64	CEP170_KAN619-10_4.tif:0001-0154	0.826	117.308	0	366	76.568	11.122	0.878	96.863	18652	1.651	0.606	0.914	0.907113
65	CEP170_KAN619-10_4.tif:0002-0154	0.592	91.298	0	208	89.719	11.134	0.816	54.05	10408	1.723	0.58	0.95	0.506178
66	CEP170_KAN619-10_4.tif:0003-0206	1.096	122.777	0	404	47.098	14.858	0.81	134.534	25906	1.148	0.871	0.911	1.2599
67	CEP170_KAN619-10_4.tif:0004-0274	0.878	134.544	0	409	30.646	19.755	0.92	118.082	22738	1.104	0.906	0.936	1.10583
68	CEP170_KAN619-10_4.tif:0005-0296	0.727	153.343	0	520	11.17	21.377	0.903	111.486	21468	1.077	0.928	0.952	1.04407
69	CEP170_KAN619-10_4.tif:0006-0431	0.597	86.957	0	303	1.547	31.113	0.861	51.931	10000	1.408	0.71	0.916	0.486335
70	CEP170_KAN619-10_4.tif:0007-0440	0.935	99.783	0	324	73.769	31.774	0.789	93.274	17961	1.315	0.761	0.911	0.873507
71	CEP170_KAN619-10_4.tif:0008-0572	0.696	139.701	0	456	46.485	41.233	0.937	97.216	18720	1.113	0.898	0.944	0.91042
72	CEP170_KAN619-10_4.tif:0009-0779	0.727	97.829	0	242	22.601	56.132	0.893	71.125	13696	1.447	0.691	0.94	0.666085
73	CEP170_KAN619-10_4.tif:0010-0967	0.717	110	0	292	44.207	69.679	0.848	78.832	15180	1.206	0.829	0.893	0.738257
74	CEP170_KAN619-10_4.tif:0011-1019	0.893	87.32	0	276	68.519	73.429	0.872	77.996	15019	1.2	0.834	0.917	0.730427
75	CEP170_KAN619-10_4.tif:0012-1083	0.831	93.819	0	294	12.52	78.088	0.838	77.954	15011	1.483	0.674	0.933	0.730038
76	CEP170_KAN619-10_4.tif:0013-1230	0.685	123.386	0	331	3.731	88.67	0.842	84.581	16287	1.345	0.744	0.91	0.792095
88	CEP170_KAN619-10_5.tif:0001-0022	0.831	115.356	0	302	90.89	1.655	0.838	95.85	18457	1.662	0.602	0.955	0.897629
89	CEP170_KAN619-10_5.tif:0002-0028	0.784	86.371	0	289	68.847	2.036	0.783	67.729	13042	1.648	0.607	0.873	0.634279
90	CEP170_KAN619-10_5.tif:0003-0342	0.826	136.893	0	404	45.674	24.655	0.919	113.034	21766	1.178	0.849	0.924	1.05856
91	CEP170_KAN619-10_5.tif:0004-0466	0.893	109.733	0	338	34.22	33.6	0.824	98.015	18874	1.528	0.654	0.903	0.91791
92	CEP170_KAN619-10_5.tif:0005-0473	1.106	153.329	0	519	82.116	34.13	0.828	169.603	32659	1.361	0.735	0.901	1.58832
93	CEP170_KAN619-10_5.tif:0006-0558	0.789	128.296	0	355	67.822	40.196	0.934	101.272	19501	1.129	0.886	0.941	0.948403
94	CEP170_KAN619-10_5.tif:0007-0776	0.737	115.754	0	341	21.137	55.927	0.92	85.36	16437	1.398	0.715	0.925	0.79939
95	CEP170_KAN619-10_5.tif:0008-0822	0.971	91.342	0	290	46.379	59.277	0.868	88.704	17081	1.169	0.856	0.908	0.83071
96	CEP170_KAN619-10_5.tif:0009-0845	0.935	80.278	0	277	70.981	60.945	0.806	75.041	14450	1.282	0.78	0.891	0.702755
97	CEP170_KAN619-10_5.tif:0010-1243	0.602	118.974	0	344	71.337	89.603	0.92	71.671	13801	1.305	0.766	0.935	0.671192
98	CEP170_KAN619-10_5.tif:0011-1258	0.841	93.13	0	275	15.112	90.627	0.742	78.349	15087	1.347	0.742	0.855	0.733734
107	CEP170_KAN619-10_6.tif:0001-0026	1.137	90.393	0	313	34.054	1.915	0.785	102.804	19796	1.513	0.661	0.903	0.96275
108	CEP170_KAN619-10_6.tif:0002-0168	0.706	126.404	0	390	48.1	12.149	0.905	89.275	17191	1.106	0.904	0.889	0.836059
109	CEP170_KAN619-10_6.tif:0003-0279	0.68	112.183	0	335	64.527	20.118	0.868	76.318	14696	1.448	0.691	0.936	0.714719
110	CEP170_KAN619-10_6.tif:0004-0616	1.023	125.289	0	459	26.824	44.348	0.75	128.177	24682	1.365	0.733	0.874	1.20037
111	CEP170_KAN619-10_6.tif:0005-0640	1.153	114.374	0	674	81.62	46.1	0.828	131.859	25391	1.21	0.826	0.919	1.23485
112	CEP170_KAN619-10_6.tif:0006-0754	0.893	104.831	0	396	72.029	54.348	0.936	93.638	18031	1.174	0.851	0.927	0.876912
113	CEP170_KAN619-10_6.tif:0007-1031	1.127	111.977	0	421	27.174	74.244	0.816	126.188	24299	1.11	0.901	0.923	1.18175
114	CEP170_KAN619-10_6.tif:0008-1059	0.945	118.703	0	375	54.777	76.323	0.844	112.193	21604	1.463	0.684	0.91	1.05068
										20659.5				1.00474
														0
														0
														0
121	CEP170_KAN619-11_1.tif:0001-0241	1.392	62.414	0	236	54.23	17.401	0.664	86.866	16727	2.437	0.41	0.898	0.813493
122	CEP170_KAN619-11_1.tif:0002-0273	0.665	117.234	0	329	3.486	19.671	0.848	77.928	15006	1.536	0.651	0.938	0.729795
123	CEP170_KAN619-11_1.tif:0003-0349	1.677	78.526	0	451	81.031	25.17	0.729	131.719	25364	2.177	0.459	0.922	1.23354
124	CEP170_KAN619-11_1.tif:0004-0530	0.826	72.836	0	242	49.89	38.178	0.893	60.142	11581	1.198	0.835	0.981	0.563225
125	CEP170_KAN619-11_1.tif:0005-0559	1.252	55.71	0	289	13.969	40.312	0.717	69.723	13426	2.075	0.482	0.931	0.652954
126	CEP170_KAN619-11_1.tif:0006-0762	1.423	113.485	0	515	55.611	54.916	0.738	161.481	31095	1.865	0.536	0.904	1.51226
136	CEP170_KAN619-11_2.tif:0001-0225	1.013	128	0	428	71.094	16.209	0.925	129.621	24960	1.053	0.949	0.929	1.21389
137	CEP170_KAN619-11_2.tif:0002-0315	1.246	138.762	0	466	14.857	22.66	0.763	172.947	33303	2.082	0.48	0.909	1.61964
138	CEP170_KAN619-11_2.tif:0003-0422	0.883	109.747	0	296	44.533	30.397	0.853	96.889	18657	1.321	0.757	0.904	0.907356
139	CEP170_KAN619-11_2.tif:0004-0464	1.018	83.781	0	319	76.564	33.425	0.87	85.277	16421	1.282	0.78	0.922	0.798612
140	CEP170_KAN619-11_2.tif:0005-0871	0.997	109.703	0	417	51.792	62.748	0.899	109.383	21063	1.144	0.874	0.948	1.02437
141	CEP170_KAN619-11_2.tif:0006-0905	0.898	98.838	0	353	19.656	65.28	0.848	88.798	17099	1.131	0.884	0.899	0.831585
142	CEP170_KAN619-11_2.tif:0007-1007	0.898	98.538	0	310	75.071	72.626	0.919	88.528	17047	1.13	0.885	0.935	0.829056
143	CEP170_KAN619-11_2.tif:0008-1082	0.914	99.466	0	335	61.014	78.016	0.913	90.911	17506	1.117	0.895	0.936	0.851379
144	CEP170_KAN619-11_2.tif:0009-1143	0.95	138.022	0	499	68.899	82.437	0.906	131.169	25258	1.142	0.876	0.951	1.22839
158	CEP170_KAN619-11_3.tif:0001-0151	0.795	100.039	0	246	80.378	10.942	0.863	79.486	15306	1.166	0.858	0.911	0.744385
159	CEP170_KAN619-11_3.tif:0002-0175	1.215	143.372	0	547	38.628	12.58	0.891	174.225	33549	1.214	0.824	0.929	1.63161
160	CEP170_KAN619-11_3.tif:0003-0218	1.148	196.339	0	732	20.215	15.715	0.942	225.336	43391	1.029	0.972	0.944	2.11026
161	CEP170_KAN619-11_3.tif:0004-0300	1.215	157.017	0	632	12.205	21.568	0.816	190.807	36742	1.324	0.755	0.914	1.78689
162	CEP170_KAN619-11_3.tif:0005-0345	1.355	109.617	0	586	77.667	24.842	0.859	148.576	28610	1.237	0.808	0.942	1.39141
163	CEP170_KAN619-11_3.tif:0006-0446	0.592	115.86	0	282	66.089	32.106	0.916	68.591	13208	1.209	0.827	0.942	0.642352
164	CEP170_KAN619-11_3.tif:0007-0461	0.883	112.359	0	382	53.196	33.253	0.861	99.194	19101	1.097	0.912	0.919	0.928949
165	CEP170_KAN619-11_3.tif:0008-0536	0.732	105.922	0	216	89.392	38.555	0.721	77.56	14935	1.624	0.616	0.857	0.726342
166	CEP170_KAN619-11_3.tif:0009-0700	1.028	128.712	0	505	18.766	50.459	0.841	132.347	25485	1.252	0.799	0.943	1.23943
167	CEP170_KAN619-11_3.tif:0010-0762	1.355	148.046	0	610	74.261	54.979	0.845	200.663	38640	1.371	0.729	0.908	1.8792
168	CEP170_KAN619-11_3.tif:0011-0931	0.722	119.683	0	347	10.671	67.092	0.935	86.393	16636	1.333	0.75	0.946	0.809068
169	CEP170_KAN619-11_3.tif:0012-1102	0.987	108.721	0	415	66.705	79.427	0.862	107.275	20657	1.383	0.723	0.92	1.00462
170	CEP170_KAN619-11_3.tif:0013-1237	0.878	68.124	0	240	44.871	89.162	0.856	59.789	11513	1.132	0.883	0.909	0.559918
184	CEP170_KAN619-11_4.tif:0001-0079	0.618	67.126	0	212	9.608	5.708	0.661	41.483	7988	2.052	0.487	0.821	0.388485
185	CEP170_KAN619-11_4.tif:0002-0108	1.496	139.014	0	756	26.769	7.778	0.801	207.913	40036	1.545	0.647	0.923	1.94709
186	CEP170_KAN619-11_4.tif:0003-0211	0.956	56.364	0	231	91.211	15.264	0.665	53.858	10371	2.071	0.483	0.84	0.504379
187	CEP170_KAN619-11_4.tif:0004-0225	1.059	99.652	0	364	57.677	16.232	0.777	105.571	20329	1.491	0.671	0.887	0.988671
188	CEP170_KAN619-11_4.tif:0005-0341	0.68	76.092	0	226	27.505	24.6	0.814	51.765	9968	1.61	0.621	0.916	0.484779
189	CEP170_KAN619-11_4.tif:0006-0396	0.93	99.061	0	345	81.276	28.628	0.831	92.085	17732	1.447	0.691	0.918	0.86237
190	CEP170_KAN619-11_4.tif:0007-0497	0.717	95.384	0	348	65.961	35.795	0.806	68.357	13163	1.475	0.678	0.887	0.640163
191	CEP170_KAN619-11_4.tif:0008-0807	1.117	131.242	0	427	36.849	58.101	0.802	146.535	28217	1.658	0.603	0.925	1.37229
192	CEP170_KAN619-11_4.tif:0009-0886	0.618	120.37	0	269	15.933	63.892	0.956	74.387	14324	1.193	0.838	0.96	0.696627
193	CEP170_KAN619-11_4.tif:0010-0992	1.179	130.115	0	458	88.333	71.581	0.908	153.385	29536	1.2	0.834	0.954	1.43644
194	CEP170_KAN619-11_4.tif:0011-0998	1.049	137.569	0	566	56.021	71.922	0.822	144.312	27789	1.196	0.836	0.92	1.35148
195	CEP170_KAN619-11_4.tif:0012-1143	1.137	87.342	0	438	21.669	82.427	0.807	99.335	19128	1.677	0.596	0.926	0.930263
196	CEP170_KAN619-11_4.tif:0013-1198	0.795	132.046	0	414	71.093	86.386	0.907	104.917	20203	1.202	0.832	0.916	0.982544
206	CEP170_KAN619-11_5.tif:0001-0267	0.649	113.16	0	334	53.075	19.253	0.884	73.457	14145	1.288	0.777	0.94	0.687922
207	CEP170_KAN619-11_5.tif:0002-0332	1.106	148.286	0	538	21.274	23.947	0.835	164.026	31585	1.699	0.589	0.93	1.53609
208	CEP170_KAN619-11_5.tif:0003-0390	1.366	78.757	0	454	85.473	28.181	0.777	107.566	20713	1.712	0.584	0.916	1.00735
209	CEP170_KAN619-11_5.tif:0004-0426	0.982	146.82	0	500	30.309	30.668	0.906	144.105	27749	1.134	0.882	0.931	1.34953
210	CEP170_KAN619-11_5.tif:0005-0555	0.872	116.833	0	323	56.527	39.939	0.805	101.931	19628	1.248	0.801	0.88	0.954579
211	CEP170_KAN619-11_5.tif:0006-0712	1.174	140.558	0	544	6.824	51.337	0.923	164.966	31766	1.224	0.817	0.95	1.54489
212	CEP170_KAN619-11_5.tif:0007-0792	0.8	104.519	0	389	65.598	57.057	0.818	83.589	16096	1.158	0.863	0.885	0.782806
213	CEP170_KAN619-11_5.tif:0008-1002	0.737	123.007	0	271	12.735	72.25	0.906	90.709	17467	1.289	0.776	0.94	0.849482
214	CEP170_KAN619-11_5.tif:0009-1069	0.992	98.293	0	393	35.475	77.053	0.924	97.496	18774	1.167	0.857	0.962	0.913046
225	CEP170_KAN619-11_6.tif:0001-0259	1.148	89.421	0	403	77.55	18.685	0.786	102.627	19762	1.619	0.618	0.893	0.961096
226	CEP170_KAN619-11_6.tif:0002-0483	1.111	82.164	0	366	15.375	34.862	0.789	91.311	17583	1.685	0.593	0.918	0.855124
227	CEP170_KAN619-11_6.tif:0003-0529	0.935	103.211	0	390	34.056	38.087	0.862	96.478	18578	1.46	0.685	0.938	0.903514
228	CEP170_KAN619-11_6.tif:0004-0562	1.194	141.317	0	559	87.047	40.573	0.872	168.793	32503	1.175	0.851	0.96	1.58074
229	CEP170_KAN619-11_6.tif:0005-0561	1.174	78.664	0	352	47.099	40.441	0.833	92.324	17778	1.79	0.559	0.958	0.864607
230	CEP170_KAN619-11_6.tif:0006-0628	0.93	109.352	0	303	1.438	45.289	0.878	101.651	19574	1.309	0.764	0.935	0.951953
231	CEP170_KAN619-11_6.tif:0007-0657	0.737	102.085	0	281	10.943	47.39	0.966	75.28	14496	1.102	0.908	0.963	0.704992
232	CEP170_KAN619-11_6.tif:0008-0922	0.935	131.3	0	511	18.897	66.504	0.862	122.735	23634	1.348	0.742	0.94	1.14941
233	CEP170_KAN619-11_6.tif:0009-0993	0.597	127.087	0	375	61.934	71.569	0.981	75.898	14615	1.103	0.906	0.947	0.710779
234	CEP170_KAN619-11_6.tif:0010-1009	0.997	118.75	0	376	41.452	72.719	0.826	118.404	22800	1.686	0.593	0.93	1.10884
										21338.6				1.03777
														0
														0
														0
237	CEP170_KAN619-12_1.tif:0001-0580	1.007	131.49	0	415	88.46	41.809	0.793	132.472	25509	1.678	0.596	0.9	1.24059
238	CEP170_KAN619-12_1.tif:0002-0692	0.556	114.822	0	301	37.508	49.908	0.924	63.803	12286	1.24	0.806	0.955	0.597512
248	CEP170_KAN619-12_2.tif:0001-0186	0.909	95.789	0	301	56.607	13.439	0.838	87.053	16763	1.484	0.674	0.907	0.815244
249	CEP170_KAN619-12_2.tif:0002-0317	1.132	136.706	0	653	74.232	22.853	0.806	154.766	29802	1.365	0.732	0.876	1.44938
250	CEP170_KAN619-12_2.tif:0003-0699	0.634	141.09	0	541	44.355	50.359	0.924	89.39	17213	1.289	0.776	0.976	0.837129
251	CEP170_KAN619-12_2.tif:0004-0713	0.701	124.933	0	397	50.716	51.422	0.861	87.588	16866	1.574	0.635	0.934	0.820253
252	CEP170_KAN619-12_2.tif:0005-0785	0.857	117.794	0	342	1.522	56.614	0.791	100.934	19436	1.558	0.642	0.897	0.945242
253	CEP170_KAN619-12_2.tif:0006-0837	0.997	108.958	0	408	22.977	60.29	0.819	108.641	20920	1.712	0.584	0.895	1.01741
254	CEP170_KAN619-12_2.tif:0007-1016	0.836	162.615	0	607	50.059	73.219	0.917	135.962	26181	1.126	0.888	0.95	1.27327
255	CEP170_KAN619-12_2.tif:0008-1137	0.81	98.705	0	290	73.333	82.015	0.837	79.964	15398	1.194	0.838	0.904	0.748859
256	CEP170_KAN619-12_2.tif:0009-1163	0.727	92.9	0	256	14.963	83.817	0.893	67.542	13006	1.243	0.805	0.927	0.632528
267	CEP170_KAN619-12_3.tif:0001-0204	0.685	67.311	0	219	67.101	14.703	0.861	46.141	8885	1.44	0.694	0.971	0.432109
268	CEP170_KAN619-12_3.tif:0002-0417	0.519	102.26	4	209	10.402	30.068	0.78	53.105	10226	1.784	0.56	0.905	0.497327
269	CEP170_KAN619-12_3.tif:0003-0471	0.888	162.982	0	528	61.147	33.976	0.964	144.733	27870	1.142	0.876	0.955	1.35542
270	CEP170_KAN619-12_3.tif:0004-0817	0.976	121.888	0	484	79.819	58.929	0.872	119.001	22915	1.331	0.751	0.917	1.11444
271	CEP170_KAN619-12_3.tif:0005-0820	0.821	133.519	0	435	10.581	59.093	0.891	109.555	21096	1.215	0.823	0.924	1.02597
272	CEP170_KAN619-12_3.tif:0006-0897	0.826	90.906	0	235	70.906	64.658	0.825	75.062	14454	1.441	0.694	0.891	0.702949
273	CEP170_KAN619-12_3.tif:0007-1010	0.582	99.5	0	186	40.052	72.774	0.734	57.872	11144	1.893	0.528	0.848	0.541972
274	CEP170_KAN619-12_3.tif:0008-1074	0.841	112.494	0	332	12.346	77.399	0.861	94.64	18224	1.334	0.749	0.913	0.886298
275	CEP170_KAN619-12_3.tif:0009-1201	0.582	132.661	0	408	28.817	86.526	0.884	77.16	14858	1.25	0.8	0.97	0.722597
276	CEP170_KAN619-12_3.tif:0010-1265	0.893	99.872	0	354	72.792	91.184	0.788	89.208	17178	1.474	0.679	0.887	0.835427
286	CEP170_KAN619-12_4.tif:0001-0216	0.587	96.345	0	293	66.295	15.577	0.769	56.538	10887	1.736	0.576	0.869	0.529473
287	CEP170_KAN619-12_4.tif:0002-0282	0.665	136.797	0	484	48.059	20.335	0.921	90.932	17510	1.309	0.764	0.938	0.851573
288	CEP170_KAN619-12_4.tif:0003-0596	0.805	109.219	0	241	81.155	42.92	0.865	87.915	16929	1.131	0.884	0.886	0.823317
289	CEP170_KAN619-12_4.tif:0004-0607	0.971	145.299	0	486	41.874	43.735	0.876	141.103	27171	1.247	0.802	0.935	1.32142
290	CEP170_KAN619-12_4.tif:0005-0797	0.867	105.659	0	317	83.133	57.479	0.8	91.633	17645	1.27	0.787	0.868	0.858139
291	CEP170_KAN619-12_4.tif:0006-0847	1.2	117.645	0	528	40.748	61.018	0.775	141.129	27176	1.45	0.69	0.892	1.32167
292	CEP170_KAN619-12_4.tif:0007-0892	1.028	99.869	0	384	15.55	64.265	0.91	102.689	19774	1.027	0.974	0.912	0.96168
293	CEP170_KAN619-12_4.tif:0008-0969	0.831	138.9	0	480	1.242	69.887	0.902	115.412	22224	1.217	0.822	0.928	1.08083
294	CEP170_KAN619-12_4.tif:0009-1115	1.132	143.413	0	609	65.125	80.359	0.883	162.359	31264	1.11	0.901	0.905	1.52048
306	CEP170_KAN619-12_5.tif:0001-0124	1.516	57.449	0	304	4.025	8.934	0.724	87.115	16775	1.36	0.735	0.859	0.815828
307	CEP170_KAN619-12_5.tif:0002-0202	1.033	131.317	0	471	37.166	14.543	0.813	135.707	26132	1.525	0.656	0.888	1.27089
308	CEP170_KAN619-12_5.tif:0003-0232	0.732	130.199	0	373	72.895	16.739	0.876	95.336	18358	1.393	0.718	0.94	0.892815
309	CEP170_KAN619-12_5.tif:0004-0495	1.168	93.729	0	373	73.532	35.666	0.769	109.518	21089	1.734	0.577	0.904	1.02563
310	CEP170_KAN619-12_5.tif:0005-0503	0.826	129.019	0	372	47.922	36.275	0.866	106.532	20514	1.425	0.702	0.909	0.997669
311	CEP170_KAN619-12_5.tif:0006-0554	0.914	136.858	0	552	16.989	39.897	0.843	125.087	24087	1.581	0.632	0.926	1.17144
312	CEP170_KAN619-12_5.tif:0007-0570	0.644	109.323	0	283	91.607	41.136	0.867	70.398	13556	1.209	0.827	0.908	0.659276
313	CEP170_KAN619-12_5.tif:0008-0958	0.654	118.675	0	285	68.905	69.036	0.943	77.653	14953	1.025	0.976	0.951	0.727217
314	CEP170_KAN619-12_5.tif:0009-0960	0.54	117.154	0	319	21.602	69.171	0.956	63.273	12184	1.23	0.813	0.95	0.592551
315	CEP170_KAN619-12_5.tif:0010-1007	0.66	119.071	0	276	58.803	72.599	0.864	78.531	15122	1.418	0.705	0.937	0.735437
316	CEP170_KAN619-12_5.tif:0011-1091	0.914	130.176	0	478	4.792	78.623	0.799	118.98	22911	1.529	0.654	0.9	1.11424
326	CEP170_KAN619-12_6.tif:0001-0093	0.872	96.619	0	300	42.688	6.744	0.872	84.295	16232	1.391	0.719	0.926	0.78942
327	CEP170_KAN619-12_6.tif:0002-0114	1.018	136.781	0	682	27.282	8.256	0.93	139.223	26809	1.227	0.815	0.951	1.30382
328	CEP170_KAN619-12_6.tif:0003-0291	0.893	134.163	0	402	56.573	20.967	0.863	119.837	23076	1.203	0.831	0.908	1.12227
329	CEP170_KAN619-12_6.tif:0004-0407	0.878	120.189	0	379	67.754	29.352	0.848	105.483	20312	1.535	0.652	0.916	0.987845
330	CEP170_KAN619-12_6.tif:0005-0671	0.67	139.519	0	379	0.523	48.392	0.761	93.466	17998	2.102	0.476	0.928	0.875307
331	CEP170_KAN619-12_6.tif:0006-0710	1.044	95.766	0	345	70.117	51.14	0.788	99.963	19249	1.639	0.61	0.889	0.936147
332	CEP170_KAN619-12_6.tif:0007-0878	0.722	152.928	0	527	4.072	63.274	0.972	110.391	21257	1.109	0.902	0.955	1.0338
333	CEP170_KAN619-12_6.tif:0008-0928	0.93	113.156	0	346	46.771	66.867	0.858	105.187	20255	1.569	0.637	0.937	0.985073
334	CEP170_KAN619-12_6.tif:0009-1126	0.602	103.431	0	256	13.345	81.127	0.844	62.307	11998	1.088	0.919	0.921	0.583505
										19073.5				0.927614
														0
														0
														0
341	CEP170_KAN619-13_1.tif:0001-0147	1.21	94.133	0	359	51.53	10.594	0.788	113.901	21933	1.799	0.556	0.943	1.06668
342	CEP170_KAN619-13_1.tif:0002-0166	0.769	118.209	0	427	74.698	11.955	0.855	90.854	17495	1.159	0.863	0.892	0.850844
343	CEP170_KAN619-13_1.tif:0003-0385	1.194	83.591	0	355	72.473	27.833	0.687	99.843	19226	1.445	0.692	0.82	0.935029
344	CEP170_KAN619-13_1.tif:0004-0563	0.81	144.654	0	492	21.387	40.584	0.889	117.189	22566	1.495	0.669	0.954	1.09746
345	CEP170_KAN619-13_1.tif:0005-0719	1.413	137.11	0	622	62.742	51.811	0.704	193.673	37294	1.907	0.524	0.877	1.81374
346	CEP170_KAN619-13_1.tif:0006-0973	0.789	172.921	0	684	69.178	70.169	0.959	136.497	26284	1.262	0.792	0.953	1.27828
357	CEP170_KAN619-13_2.tif:0001-0133	1.08	102.707	0	330	10.253	9.536	0.745	110.941	21363	1.587	0.63	0.881	1.03896
358	CEP170_KAN619-13_2.tif:0002-0218	0.997	169.641	0	839	43.816	15.721	0.871	169.146	32571	1.294	0.773	0.919	1.58404
359	CEP170_KAN619-13_2.tif:0003-0428	0.602	115.672	0	312	21.653	30.897	0.894	69.682	13418	1.244	0.804	0.921	0.652565
360	CEP170_KAN619-13_2.tif:0004-0557	0.769	139.243	0	409	40.725	40.128	0.944	107.02	20608	1.176	0.85	0.958	1.00224
361	CEP170_KAN619-13_2.tif:0005-0563	0.878	114.296	0	306	63.617	40.602	0.848	100.311	19316	1.067	0.937	0.899	0.939406
362	CEP170_KAN619-13_2.tif:0006-0945	1.423	84.394	0	360	59.219	68.236	0.726	120.086	23124	1.558	0.642	0.859	1.1246
363	CEP170_KAN619-13_2.tif:0007-1036	1.007	119.995	0	412	0.833	74.706	0.817	120.891	23279	1.634	0.612	0.911	1.13214
364	CEP170_KAN619-13_2.tif:0008-1065	1.132	93.927	0	341	21.643	76.729	0.731	106.335	20476	1.643	0.609	0.867	0.995821
365	CEP170_KAN619-13_2.tif:0009-1137	0.737	102.761	0	293	73.312	81.972	0.829	75.778	14592	1.766	0.566	0.934	0.709661
366	CEP170_KAN619-13_2.tif:0010-1179	1.007	103.603	0	334	74.477	85.001	0.807	104.377	20099	1.16	0.862	0.913	0.977486
378	CEP170_KAN619-13_3.tif:0001-0133	0.919	116.316	0	379	55.651	9.626	0.829	106.917	20588	1.421	0.704	0.917	1.00127
379	CEP170_KAN619-13_3.tif:0002-0154	0.685	133.068	0	419	14.323	11.122	0.949	91.218	17565	1.113	0.898	0.946	0.854248
380	CEP170_KAN619-13_3.tif:0003-0478	0.961	120.914	0	396	37.171	34.433	0.89	116.166	22369	1.095	0.913	0.896	1.08788
381	CEP170_KAN619-13_3.tif:0004-0541	0.888	124.661	0	323	50.913	39.008	0.887	110.702	21317	1.281	0.781	0.932	1.03672
382	CEP170_KAN619-13_3.tif:0005-0630	0.914	110.193	0	278	84.331	45.454	0.664	100.716	19394	2.22	0.45	0.863	0.943199
383	CEP170_KAN619-13_3.tif:0006-0668	0.93	130.039	0	396	87.813	48.125	0.878	120.881	23277	1.173	0.852	0.932	1.13204
384	CEP170_KAN619-13_3.tif:0007-0816	0.935	110.056	0	330	5.205	58.833	0.775	102.876	19810	1.779	0.562	0.893	0.963431
385	CEP170_KAN619-13_3.tif:0008-0833	0.81	144.205	0	433	81.666	60.06	0.959	116.825	22496	1.111	0.9	0.948	1.09406
386	CEP170_KAN619-13_3.tif:0009-0906	1.054	93.345	0	409	34.545	65.217	0.786	98.405	18949	1.387	0.721	0.923	0.921557
387	CEP170_KAN619-13_3.tif:0010-1107	0.774	153.913	0	491	64.432	79.779	0.902	119.094	22933	1.235	0.81	0.952	1.11531
388	CEP170_KAN619-13_3.tif:0011-1124	0.831	112.544	0	314	10.941	81.007	0.83	93.513	18007	1.504	0.665	0.907	0.875744
396	CEP170_KAN619-13_4.tif:0001-0220	1.059	143.824	0	527	86.758	15.902	0.909	152.367	29340	1.117	0.896	0.909	1.42691
397	CEP170_KAN619-13_4.tif:0002-0248	0.763	128.905	0	459	63.704	17.865	0.881	98.405	18949	1.35	0.741	0.922	0.921557
398	CEP170_KAN619-13_4.tif:0003-0416	0.867	105.551	0	335	42.434	29.993	0.79	91.54	17627	1.515	0.66	0.905	0.857264
399	CEP170_KAN619-13_4.tif:0004-0435	0.914	78.301	0	321	57.437	31.337	0.748	71.567	13781	1.941	0.515	0.896	0.670219
400	CEP170_KAN619-13_4.tif:0005-0463	0.618	133.739	0	405	3.002	33.354	0.902	82.649	15915	1.131	0.884	0.952	0.774003
401	CEP170_KAN619-13_4.tif:0006-0968	1.158	129.982	0	714	54.186	69.786	0.849	150.529	28986	1.477	0.677	0.925	1.40969
402	CEP170_KAN619-13_4.tif:0007-1173	0.966	108.844	0	340	87.936	84.605	0.883	105.135	20245	1.042	0.96	0.916	0.984586
413	CEP170_KAN619-13_5.tif:0001-0294	0.644	164.508	0	644	39.253	21.217	0.913	105.935	20399	1.105	0.905	0.976	0.992076
414	CEP170_KAN619-13_5.tif:0002-0376	1.054	129.02	0	435	80.956	27.121	0.873	136.014	26191	1.171	0.854	0.919	1.27376
415	CEP170_KAN619-13_5.tif:0003-0467	0.68	131.511	0	427	8.333	33.659	0.916	89.468	17228	1.11	0.901	0.929	0.837859
416	CEP170_KAN619-13_5.tif:0004-0632	0.706	151.037	0	478	77.378	45.571	0.951	106.672	20541	1.093	0.915	0.951	0.998982
417	CEP170_KAN619-13_5.tif:0005-0691	1.065	152.932	0	571	68.064	49.825	0.838	162.81	31351	1.135	0.881	0.899	1.52471
418	CEP170_KAN619-13_5.tif:0006-0749	0.93	158.989	0	530	45.711	54.016	0.92	147.792	28459	1.177	0.849	0.932	1.38406
419	CEP170_KAN619-13_5.tif:0007-0764	1.148	121.498	0	358	88.598	55.058	0.786	139.441	26851	1.336	0.748	0.87	1.30586
420	CEP170_KAN619-13_5.tif:0008-1048	0.888	148.778	0	462	26.187	75.521	0.887	132.119	25441	1.464	0.683	0.937	1.23729
421	CEP170_KAN619-13_5.tif:0009-1092	0.966	135.242	0	361	77.909	78.681	0.883	130.634	25155	1.397	0.716	0.921	1.22338
422	CEP170_KAN619-13_5.tif:0010-1158	0.639	127.642	0	440	5.269	83.437	0.948	81.532	15700	1.101	0.908	0.939	0.763547
429	CEP170_KAN619-13_6.tif:0001-0212	0.904	124.546	0	381	22.446	15.333	0.823	112.541	21671	1.068	0.936	0.923	1.05394
430	CEP170_KAN619-13_6.tif:0002-0462	0.592	112.421	0	285	19.302	33.336	0.816	66.555	12816	1.351	0.74	0.934	0.623288
431	CEP170_KAN619-13_6.tif:0003-0637	1.059	147.534	0	541	42.303	45.896	0.851	156.298	30097	1.458	0.686	0.919	1.46372
432	CEP170_KAN619-13_6.tif:0004-1021	0.841	131.469	0	344	32.765	73.582	0.96	110.604	21298	1.166	0.858	0.947	1.0358
433	CEP170_KAN619-13_6.tif:0005-1117	0.743	93.14	0	309	90.144	80.526	0.835	69.168	13319	1.514	0.661	0.908	0.64775
434	CEP170_KAN619-13_6.tif:0006-1120	0.769	122.466	0	334	70.912	80.702	0.877	94.126	18125	1.181	0.847	0.905	0.881483
443	CEP170_KAN619-13_7.tif:0001-0227	0.888	163.462	0	601	70.515	16.373	0.896	145.159	27952	1.259	0.794	0.961	1.3594
444	CEP170_KAN619-13_7.tif:0002-0546	1.059	120.662	0	491	65.564	39.399	0.761	127.829	24615	1.403	0.713	0.861	1.19711
445	CEP170_KAN619-13_7.tif:0003-0591	0.93	154.888	0	546	48.203	42.63	0.898	143.98	27725	1.361	0.735	0.94	1.34837
446	CEP170_KAN619-13_7.tif:0004-0675	0.909	71.634	0	258	15.86	48.759	0.767	65.101	12536	1.387	0.721	0.904	0.60967
447	CEP170_KAN619-13_7.tif:0005-0846	0.966	144.478	0	393	34.967	60.975	0.933	139.555	26873	1.328	0.753	0.947	1.30693
448	CEP170_KAN619-13_7.tif:0006-0852	0.717	126.268	0	344	12.2	61.405	0.914	90.491	17425	1.314	0.761	0.962	0.84744
449	CEP170_KAN619-13_7.tif:0007-1033	1.065	105.4	0	356	76.867	74.457	0.78	112.208	21607	1.501	0.666	0.891	1.05083
450	CEP170_KAN619-13_7.tif:0008-1247	0.763	131.687	0	402	43.519	89.809	0.817	100.529	19358	1.181	0.847	0.899	0.941448
										21688.4				1.05478
														0
														0
														0
459	CEP170_KAN619-14_1.tif:0001-0268	0.94	118.746	0	341	16.891	19.297	0.803	111.616	21493	1.424	0.702	0.905	1.04528
460	CEP170_KAN619-14_1.tif:0002-0294	0.784	146.51	0	496	59.242	21.235	0.978	114.888	22123	1.179	0.848	0.947	1.07592
461	CEP170_KAN619-14_1.tif:0003-0307	1.018	71.143	0	316	77.306	22.186	0.898	72.413	13944	1.178	0.849	0.947	0.678146
462	CEP170_KAN619-14_1.tif:0004-0464	0.556	110.701	0	282	16.652	33.413	0.924	61.513	11845	1.241	0.806	0.951	0.576064
463	CEP170_KAN619-14_1.tif:0005-0535	0.976	133.846	0	478	71	38.58	0.762	130.675	25163	1.571	0.636	0.87	1.22377
464	CEP170_KAN619-14_1.tif:0006-0848	1.246	56.487	0	253	25.026	61.155	0.761	70.403	13557	2.145	0.466	0.966	0.659325
465	CEP170_KAN619-14_1.tif:0007-0955	0.971	138.112	0	440	44.167	68.825	0.908	134.123	25827	1.092	0.916	0.926	1.25606
466	CEP170_KAN619-14_1.tif:0008-1091	1.21	143.382	0	739	73.427	78.703	0.828	173.493	33408	1.439	0.695	0.914	1.62475
475	CEP170_KAN619-14_2.tif:0001-0210	1.049	127.104	0	512	58.403	15.158	0.843	133.334	25675	1.44	0.694	0.904	1.24867
476	CEP170_KAN619-14_2.tif:0002-0327	1.075	163.778	0	514	3.847	23.576	0.899	176.058	33902	1.041	0.96	0.945	1.64877
477	CEP170_KAN619-14_2.tif:0003-0486	0.971	140.39	0	510	28.995	35.046	0.908	136.336	26253	1.166	0.857	0.928	1.27678
478	CEP170_KAN619-14_2.tif:0004-0528	1.091	102.981	0	422	41.508	38.062	0.866	112.307	21626	1.407	0.711	0.933	1.05175
479	CEP170_KAN619-14_2.tif:0005-0594	0.608	126.564	0	392	64.02	42.826	0.968	76.9	14808	1.164	0.859	0.951	0.720166
480	CEP170_KAN619-14_2.tif:0006-0857	1.117	154.833	0	561	68.51	61.764	0.853	172.875	33289	1.166	0.858	0.909	1.61896
481	CEP170_KAN619-14_2.tif:0007-0929	0.623	121.308	0	264	37.845	66.997	0.936	75.597	14557	1.077	0.928	0.96	0.707959
482	CEP170_KAN619-14_2.tif:0008-1088	0.95	105.923	0	405	22.499	78.473	0.869	100.664	19384	1.576	0.635	0.931	0.942713
493	CEP170_KAN619-14_3.tif:0001-0019	1.2	110.844	0	535	23.745	1.358	0.734	132.971	25605	1.767	0.566	0.888	1.24526
494	CEP170_KAN619-14_3.tif:0002-0055	0.602	110.319	0	274	47.593	4.008	0.894	66.457	12797	1.241	0.806	0.921	0.622364
495	CEP170_KAN619-14_3.tif:0003-0344	1.48	123.456	0	499	79.539	24.744	0.755	182.721	35185	1.738	0.575	0.909	1.71117
496	CEP170_KAN619-14_3.tif:0004-0448	0.914	77.102	0	233	54.299	32.243	0.717	70.471	13570	1.231	0.812	0.85	0.659957
497	CEP170_KAN619-14_3.tif:0005-0487	0.94	112.525	0	393	63.044	35.14	0.887	105.769	20367	1.189	0.841	0.933	0.990519
498	CEP170_KAN619-14_3.tif:0006-0571	0.576	120.414	0	332	7.986	41.179	0.93	69.412	13366	1.015	0.985	0.961	0.650036
499	CEP170_KAN619-14_3.tif:0007-0657	0.691	98.759	0	291	84.3	47.374	0.881	68.212	13135	1.39	0.72	0.94	0.638802
500	CEP170_KAN619-14_3.tif:0008-0935	1.033	147.276	0	561	75.271	67.369	0.813	152.201	29308	1.651	0.606	0.911	1.42535
501	CEP170_KAN619-14_3.tif:0009-0965	0.779	127.54	0	338	8.475	69.568	0.932	99.35	19131	1.051	0.952	0.952	0.930408
502	CEP170_KAN619-14_3.tif:0010-1019	1.226	111.72	0	415	41.688	73.385	0.807	136.923	26366	1.072	0.933	0.891	1.28227
514	CEP170_KAN619-14_4.tif:0001-0097	0.556	113.355	0	249	12.635	6.972	0.834	62.988	12129	1.13	0.885	0.911	0.589876
515	CEP170_KAN619-14_4.tif:0002-0147	1.111	110.35	0	398	53.051	10.607	0.822	122.636	23615	1.723	0.58	0.926	1.14848
516	CEP170_KAN619-14_4.tif:0003-0185	0.904	71.414	0	233	13.818	13.414	0.715	64.53	12426	1.322	0.757	0.877	0.60432
517	CEP170_KAN619-14_4.tif:0004-0334	1.397	102.758	0	392	32.059	24.085	0.789	143.549	27642	1.587	0.63	0.907	1.34433
518	CEP170_KAN619-14_4.tif:0005-0548	1.2	140.857	0	622	66.792	39.522	0.862	168.975	32538	1.023	0.978	0.909	1.58244
519	CEP170_KAN619-14_4.tif:0006-0552	1.215	83.671	0	337	55.251	39.856	0.722	101.677	19579	1.305	0.766	0.848	0.952196
520	CEP170_KAN619-14_4.tif:0007-0734	1.506	112.721	0	619	39.222	52.865	0.721	169.759	32689	1.748	0.572	0.858	1.58978
521	CEP170_KAN619-14_4.tif:0008-0794	1.433	107.707	0	485	10.091	57.195	0.702	154.377	29727	1.891	0.529	0.853	1.44573
522	CEP170_KAN619-14_4.tif:0009-0948	0.961	155.027	0	517	65.871	68.292	0.898	148.939	28680	1.05	0.952	0.914	1.39481
523	CEP170_KAN619-14_4.tif:0010-1146	0.826	139.937	0	399	82.351	82.565	0.919	115.548	22250	1.145	0.874	0.933	1.0821
524	CEP170_KAN619-14_4.tif:0011-1146	0.846	98.656	0	275	12.937	82.652	0.919	83.511	16081	1.272	0.786	0.939	0.782076
535	CEP170_KAN619-14_5.tif:0001-0060	1.262	65.251	0	272	54.412	4.293	0.77	82.343	15856	1.782	0.561	0.92	0.771134
536	CEP170_KAN619-14_5.tif:0002-0285	0.608	116.957	0	307	70.784	20.6	0.805	71.063	13684	1.744	0.574	0.951	0.665501
537	CEP170_KAN619-14_5.tif:0003-0438	0.883	126.047	0	365	13.215	31.602	0.882	111.279	21428	1.463	0.684	0.942	1.04212
538	CEP170_KAN619-14_5.tif:0004-0655	0.935	150.722	0	556	52.927	47.212	0.903	140.89	27130	1.188	0.842	0.938	1.31943
539	CEP170_KAN619-14_5.tif:0005-0868	1.122	86.255	0	413	25.804	62.515	0.711	96.754	18631	1.813	0.551	0.876	0.906092
540	CEP170_KAN619-14_5.tif:0006-0880	0.857	116.333	0	350	17.053	63.395	0.817	99.682	19195	1.266	0.79	0.904	0.933521
541	CEP170_KAN619-14_5.tif:0007-0893	1.355	97.732	0	405	81.351	64.329	0.808	132.467	25508	1.571	0.637	0.895	1.24054
542	CEP170_KAN619-14_5.tif:0008-1086	0.909	89.48	0	366	41.229	78.33	0.801	81.319	15659	1.498	0.668	0.902	0.761553
543	CEP170_KAN619-14_5.tif:0009-1100	1.179	78.035	0	318	54.067	79.213	0.701	91.991	17714	1.559	0.641	0.858	0.861495
544	CEP170_KAN619-14_5.tif:0010-1121	1.002	106.005	0	343	20.056	80.836	0.82	106.247	20459	1.533	0.652	0.928	0.994994
555	CEP170_KAN619-14_6.tif:0001-0167	1.215	190.962	0	835	11.223	12.067	0.928	232.056	44685	1.147	0.872	0.929	2.17319
556	CEP170_KAN619-14_6.tif:0002-0477	1.085	149.44	0	710	78.291	34.352	0.854	162.198	31233	1.268	0.789	0.915	1.51897
557	CEP170_KAN619-14_6.tif:0003-0481	0.711	93.861	0	346	38.198	34.674	0.874	66.779	12859	1.456	0.687	0.926	0.625379
558	CEP170_KAN619-14_6.tif:0004-0522	0.867	116.126	0	417	66.058	37.633	0.905	100.711	19393	1.136	0.88	0.965	0.94315
559	CEP170_KAN619-14_6.tif:0005-0659	0.66	8.244	0	40	59.061	47.53	0.806	5.437	1047	1.739	0.575	0.969	0.0509193
560	CEP170_KAN619-14_6.tif:0006-0666	1.111	167.827	0	657	29.799	47.984	0.846	186.512	35915	1.253	0.798	0.937	1.74667
561	CEP170_KAN619-14_6.tif:0007-0875	1.205	127.918	0	436	88.743	63.037	0.841	154.117	29677	1.204	0.83	0.901	1.4433
562	CEP170_KAN619-14_6.tif:0008-0931	1.34	171.326	0	1015	38.166	67.119	0.836	229.547	44202	1.297	0.771	0.905	2.1497
563	CEP170_KAN619-14_6.tif:0009-1065	1.148	158.271	0	803	68.785	76.729	0.911	181.646	34978	1.086	0.921	0.942	1.7011
564	CEP170_KAN619-14_6.tif:0010-1112	0.618	3.21	0	21	60.677	80.17	0.661	1.984	382	2.001	0.5	0.815	0.018578
										22327.6				1.08587
														0
														0
														0
576	CEP170_KAN619-15_1.tif:0001-0020	0.587	146.142	0	349	91.655	1.417	0.908	85.76	16514	1.242	0.805	0.95	0.803134
577	CEP170_KAN619-15_1.tif:0002-0105	0.769	127.412	0	378	50.66	7.59	0.91	97.927	18857	1.304	0.767	0.937	0.917083
578	CEP170_KAN619-15_1.tif:0003-0181	1.205	150.892	0	750	22.267	13.013	0.793	181.796	35007	1.654	0.604	0.906	1.70251
579	CEP170_KAN619-15_1.tif:0004-0463	1.059	203.422	0	771	9.798	33.383	0.897	215.505	41498	1.274	0.785	0.936	2.0182
580	CEP170_KAN619-15_1.tif:0005-0541	1.044	186.517	0	701	58.538	38.965	0.884	194.691	37490	1.325	0.755	0.937	1.82327
581	CEP170_KAN619-15_1.tif:0006-0547	0.623	3.25	0	17	89.118	39.445	0.873	2.025	390	1.494	0.669	0.949	0.0189671
582	CEP170_KAN619-15_1.tif:0007-0575	0.997	160.859	0	600	30.832	41.465	0.911	160.39	30885	1.405	0.712	0.941	1.50205
583	CEP170_KAN619-15_1.tif:0008-0788	0.945	137.11	0	514	28.879	56.858	0.892	129.59	24954	1.018	0.983	0.924	1.2136
584	CEP170_KAN619-15_1.tif:0009-0952	0.685	132.917	0	399	76.151	68.648	0.949	91.114	17545	1.126	0.888	0.943	0.853276
585	CEP170_KAN619-15_1.tif:0010-0970	1.085	135.196	0	616	50.733	69.885	0.869	146.738	28256	1.427	0.701	0.957	1.37419
586	CEP170_KAN619-15_1.tif:0011-1185	0.893	146.14	0	632	72.16	85.422	0.863	130.535	25136	1.676	0.597	0.922	1.22245
596	CEP170_KAN619-15_2.tif:0001-0272	0.795	134.987	0	459	6.745	19.592	0.907	107.254	20653	1.112	0.9	0.911	1.00443
597	CEP170_KAN619-15_2.tif:0002-0288	0.67	3.992	0	19	33.329	20.785	0.939	2.674	515	1.29	0.775	0.97	0.0250463
598	CEP170_KAN619-15_2.tif:0003-0351	1.179	180.947	0	653	31.904	25.313	0.864	213.309	41075	1.528	0.655	0.934	1.99762
599	CEP170_KAN619-15_2.tif:0004-0636	1.091	200.21	0	846	41.078	45.847	0.896	218.341	42044	1.214	0.823	0.931	2.04475
600	CEP170_KAN619-15_2.tif:0005-0799	1.267	80.975	0	253	32.467	57.608	0.698	102.606	19758	1.466	0.682	0.829	0.960902
601	CEP170_KAN619-15_2.tif:0006-0821	1.314	180.806	0	718	51.247	59.213	0.848	237.555	45744	1.358	0.737	0.948	2.22469
602	CEP170_KAN619-15_2.tif:0007-1030	1.262	217.366	0	757	46.342	74.247	0.857	274.302	52820	1.567	0.638	0.927	2.56882
603	CEP170_KAN619-15_2.tif:0008-1047	0.935	131.889	0	626	18.886	75.489	0.912	123.285	23740	1.142	0.875	0.942	1.15456
604	CEP170_KAN619-15_2.tif:0009-1238	1.158	116.063	0	486	70.521	89.284	0.815	134.409	25882	1.453	0.688	0.929	1.25873
611	CEP170_KAN619-15_3.tif:0001-0046	1.22	164.638	0	553	42.416	3.353	0.813	200.923	38690	1.686	0.593	0.9	1.88163
612	CEP170_KAN619-15_3.tif:0002-0343	1.293	188.333	0	847	75.746	24.712	0.792	243.533	46895	1.219	0.82	0.892	2.28067
613	CEP170_KAN619-15_3.tif:0003-0503	0.898	199.491	0	767	35.3	36.277	0.965	179.226	34512	1.108	0.903	0.943	1.67844
614	CEP170_KAN619-15_3.tif:0004-0891	1.137	175.963	0	638	54.1	64.252	0.824	200.123	38536	1.771	0.565	0.948	1.87414
615	CEP170_KAN619-15_3.tif:0005-0935	0.706	158.515	0	592	13.094	67.406	0.901	111.954	21558	1.342	0.745	0.954	1.04844
616	CEP170_KAN619-15_3.tif:0006-1147	0.556	112.953	0	339	55.706	82.65	0.953	62.764	12086	1.225	0.816	0.955	0.587785
627	CEP170_KAN619-15_4.tif:0001-0079	0.779	127.753	0	441	61.652	5.706	0.899	99.516	19163	1.375	0.727	0.932	0.931965
628	CEP170_KAN619-15_4.tif:0002-0154	1.137	181.356	0	758	76.488	11.078	0.794	206.256	39717	1.148	0.871	0.869	1.93158
629	CEP170_KAN619-15_4.tif:0003-0403	0.779	157.92	0	567	66.487	29.063	0.922	123.015	23688	1.332	0.751	0.938	1.15203
630	CEP170_KAN619-15_4.tif:0004-0426	1.07	223.053	0	970	35.015	30.722	0.906	238.62	45949	1.203	0.831	0.934	2.23466
631	CEP170_KAN619-15_4.tif:0005-0572	0.878	131.58	0	508	20.342	41.234	0.829	115.48	22237	1.549	0.645	0.909	1.08146
632	CEP170_KAN619-15_4.tif:0006-0695	0.774	134.463	0	316	68.14	50.108	0.94	104.045	20035	1.343	0.745	0.949	0.974373
633	CEP170_KAN619-15_4.tif:0007-0723	1.007	224.722	0	966	5.708	52.148	0.942	226.4	43596	1.236	0.809	0.937	2.12023
634	CEP170_KAN619-15_4.tif:0008-0769	0.831	145.081	0	508	42.724	55.445	0.85	120.549	23213	1.639	0.61	0.92	1.12893
635	CEP170_KAN619-15_4.tif:0009-1122	1.054	140.517	0	581	45.89	80.868	0.837	148.135	28525	1.41	0.709	0.916	1.38727
636	CEP170_KAN619-15_4.tif:0010-1225	0.94	106.122	0	301	1.2	88.279	0.829	99.75	19208	1.722	0.581	0.948	0.934153
645	CEP170_KAN619-15_5.tif:0001-0164	0.867	109.593	0	341	49.262	11.823	0.896	95.045	18302	1.197	0.835	0.946	0.890091
646	CEP170_KAN619-15_5.tif:0002-0218	1.381	201.677	0	964	23.207	15.77	0.855	278.592	53646	1.235	0.81	0.905	2.609
647	CEP170_KAN619-15_5.tif:0003-0389	1.158	148.834	0	599	79.965	27.982	0.78	172.361	33190	1.477	0.677	0.871	1.61415
648	CEP170_KAN619-15_5.tif:0004-0437	1.007	145.526	0	474	54.931	31.527	0.853	146.613	28232	1.168	0.856	0.9	1.37302
649	CEP170_KAN619-15_5.tif:0005-0847	0.8	147.026	0	432	14.754	61.072	0.923	117.583	22642	1.244	0.804	0.945	1.10116
650	CEP170_KAN619-15_5.tif:0006-0854	0.649	120.016	2	334	56.329	61.523	0.797	77.908	15002	1.41	0.709	0.874	0.729601
651	CEP170_KAN619-15_5.tif:0007-1023	0.815	201.312	0	750	42.613	73.725	0.894	164.135	31606	1.227	0.815	0.943	1.53711
652	CEP170_KAN619-15_5.tif:0008-1084	1.028	164.5	0	585	72.425	78.051	0.871	169.146	32571	1.254	0.797	0.927	1.58404
663	CEP170_KAN619-15_6.tif:0001-0179	0.924	202.225	0	779	26.118	12.879	0.881	186.933	35996	1.303	0.768	0.939	1.75061
664	CEP170_KAN619-15_6.tif:0002-0187	0.836	148.043	0	513	89.966	13.48	0.908	123.779	23835	1.049	0.953	0.928	1.15918
665	CEP170_KAN619-15_6.tif:0003-0235	0.893	154.61	0	499	67.348	16.984	0.914	138.101	26593	1.338	0.747	0.948	1.29331
666	CEP170_KAN619-15_6.tif:0004-0346	1.246	145.504	0	540	81.129	24.954	0.877	181.35	34921	1.408	0.71	0.95	1.69833
667	CEP170_KAN619-15_6.tif:0005-0380	0.763	148.667	0	475	46.39	27.427	0.89	113.491	21854	1.39	0.719	0.955	1.06284
668	CEP170_KAN619-15_6.tif:0006-0429	0.992	169.775	0	823	28.901	30.915	0.928	168.398	32427	1.12	0.893	0.929	1.57704
669	CEP170_KAN619-15_6.tif:0007-0616	0.872	155.762	0	517	67.721	44.417	0.851	135.894	26168	1.409	0.71	0.933	1.27264
670	CEP170_KAN619-15_6.tif:0008-0917	0.997	161.729	0	547	23.362	66.149	0.891	161.258	31052	1.483	0.674	0.946	1.51017
671	CEP170_KAN619-15_6.tif:0009-1043	0.8	114.987	0	290	87.688	75.202	0.818	91.96	17708	1.655	0.604	0.906	0.861203
672	CEP170_KAN619-15_6.tif:0010-1150	0.597	113.565	0	301	10.372	82.85	0.837	67.822	13060	1.527	0.655	0.92	0.635154
										28244				1.37361
684	CEP170_KAN619-16_1.tif:0001-0070	0.883	111.771	0	344	86.593	5.064	0.891	98.675	19001	1.265	0.79	0.939	0.924086
685	CEP170_KAN619-16_1.tif:0002-0168	0.758	134.096	0	401	83.164	12.13	0.946	101.671	19578	1.132	0.883	0.933	0.952148
686	CEP170_KAN619-16_1.tif:0003-0208	0.654	96.897	0	306	3.088	15.065	0.858	63.403	12209	1.556	0.643	0.933	0.593767
687	CEP170_KAN619-16_1.tif:0004-0292	0.987	101.111	0	448	64.341	21.069	0.862	99.766	19211	1.331	0.751	0.918	0.934299
688	CEP170_KAN619-16_1.tif:0005-0354	1.028	128.182	0	529	82.152	25.52	0.823	131.802	25380	1.663	0.601	0.938	1.23432
689	CEP170_KAN619-16_1.tif:0006-0533	0.592	103.781	0	268	30.815	38.405	0.853	61.44	11831	1.463	0.684	0.912	0.575384
690	CEP170_KAN619-16_1.tif:0007-0610	0.852	142.512	0	431	56.928	44.008	0.925	121.374	23372	1.196	0.836	0.943	1.13666
691	CEP170_KAN619-16_1.tif:0008-0647	1.085	110.66	0	384	76.28	46.622	0.862	120.107	23128	1.384	0.722	0.939	1.1248
692	CEP170_KAN619-16_1.tif:0009-0846	1.231	148.899	0	561	45.116	60.989	0.859	183.261	35289	1.356	0.738	0.931	1.71623
693	CEP170_KAN619-16_1.tif:0010-1097	0.727	123.536	0	370	56.392	79.04	0.942	89.815	17295	1.192	0.839	0.952	0.841117
694	CEP170_KAN619-16_1.tif:0011-1150	0.737	113.317	0	293	40.859	82.887	0.801	83.563	16091	1.584	0.631	0.874	0.782562
705	CEP170_KAN619-16_2.tif:0001-0055	1.309	101.5	0	439	84.114	3.933	0.832	132.83	25578	1.323	0.756	0.902	1.24395
706	CEP170_KAN619-16_2.tif:0002-0227	0.519	65.09	0	166	55.567	16.41	0.813	33.802	6509	1.368	0.731	0.917	0.316556
707	CEP170_KAN619-16_2.tif:0003-0284	0.924	107.287	0	381	52.848	20.517	0.881	99.174	19097	1.433	0.698	0.952	0.928755
708	CEP170_KAN619-16_2.tif:0004-0333	0.628	115.529	0	385	91.719	24.016	0.752	72.595	13979	1.406	0.711	0.917	0.679848
709	CEP170_KAN619-16_2.tif:0005-0579	0.68	132.084	0	407	21.009	41.758	0.942	89.857	17303	1.088	0.92	0.939	0.841506
710	CEP170_KAN619-16_2.tif:0006-0736	1.319	131.587	0	560	72.156	53.05	0.732	173.571	33423	2.054	0.487	0.922	1.62548
711	CEP170_KAN619-16_2.tif:0007-0863	1.153	160.662	0	814	55.636	62.231	0.78	185.224	35667	1.67	0.599	0.923	1.73461
712	CEP170_KAN619-16_2.tif:0008-0973	0.836	149.168	0	497	21.788	70.156	0.908	124.719	24016	1.095	0.914	0.944	1.16798
713	CEP170_KAN619-16_2.tif:0009-1000	0.982	173.058	0	655	63.481	72.082	0.877	169.857	32708	1.272	0.786	0.924	1.59071
714	CEP170_KAN619-16_2.tif:0010-1225	1.163	145.83	0	737	74.728	88.359	0.819	169.639	32666	1.717	0.583	0.943	1.58866
725	CEP170_KAN619-16_3.tif:0001-0013	0.945	143.088	0	478	91.063	0.964	0.935	135.24	26042	1.136	0.88	0.931	1.26651
726	CEP170_KAN619-16_3.tif:0002-0145	0.795	125.19	0	339	54.48	10.447	0.917	99.47	19154	1.247	0.802	0.947	0.931527
727	CEP170_KAN619-16_3.tif:0003-0254	0.924	93.455	0	257	67.516	18.358	0.834	86.388	16635	1.162	0.861	0.901	0.809019
728	CEP170_KAN619-16_3.tif:0004-0273	0.722	122.245	0	361	20.45	19.693	0.935	88.242	16992	1.403	0.713	0.939	0.826381
729	CEP170_KAN619-16_3.tif:0005-0504	0.935	131.2	0	509	28.584	36.399	0.903	122.641	23616	1.382	0.724	0.933	1.14853
730	CEP170_KAN619-16_3.tif:0006-0644	0.997	134.703	0	400	37.9	46.416	0.891	134.31	25863	1.241	0.806	0.937	1.25781
731	CEP170_KAN619-16_3.tif:0007-0733	1.044	104.478	0	466	68.277	52.838	0.873	109.056	21000	1.433	0.698	0.946	1.0213
732	CEP170_KAN619-16_3.tif:0008-0835	0.639	129.732	0	376	26.429	60.193	0.906	82.867	15957	1.184	0.845	0.976	0.776046
733	CEP170_KAN619-16_3.tif:0009-0948	0.717	76.957	0	224	21.914	68.263	0.88	55.151	10620	1.177	0.85	0.926	0.516488
734	CEP170_KAN619-16_3.tif:0010-0971	0.561	112.602	0	253	48.649	69.979	0.962	63.154	12161	1.206	0.829	0.96	0.591433
744	CEP170_KAN619-16_4.tif:0001-0110	0.862	142.777	0	392	21.382	7.912	0.882	123.083	23701	1.487	0.672	0.933	1.15266
745	CEP170_KAN619-16_4.tif:0002-0175	0.852	147.646	0	493	38.088	12.631	0.902	125.747	24214	1.146	0.872	0.94	1.17761
746	CEP170_KAN619-16_4.tif:0003-0285	1.106	110.047	0	390	74.682	20.552	0.845	121.727	23440	1.145	0.874	0.897	1.13997
747	CEP170_KAN619-16_4.tif:0004-0640	1.075	105.377	0	328	13.072	46.057	0.818	113.278	21813	1.39	0.719	0.937	1.06084
748	CEP170_KAN619-16_4.tif:0005-0779	0.628	118.413	0	308	57.688	56.134	0.906	74.407	14328	1.138	0.879	0.927	0.696821
749	CEP170_KAN619-16_4.tif:0006-0823	0.976	192.537	0	725	72.713	59.284	0.88	187.976	36197	1.128	0.887	0.945	1.76039
750	CEP170_KAN619-16_4.tif:0007-0907	0.587	95.283	0	285	25.02	65.378	0.935	55.915	10767	1.31	0.764	0.95	0.523637
751	CEP170_KAN619-16_4.tif:0008-1028	1.096	119.886	0	478	22.94	74.113	0.862	131.366	25296	1.261	0.793	0.915	1.23023
752	CEP170_KAN619-16_4.tif:0009-1096	0.784	142.192	0	565	46.521	79.005	0.905	111.502	21471	1.12	0.893	0.929	1.04421
766	CEP170_KAN619-16_5.tif:0001-0110	0.732	126.248	0	422	0.61	7.936	0.886	92.443	17801	1.32	0.758	0.959	0.865726
767	CEP170_KAN619-16_5.tif:0002-0151	0.737	140.697	0	458	49.448	10.903	0.956	103.754	19979	1.243	0.805	0.947	0.97165
768	CEP170_KAN619-16_5.tif:0003-0168	0.753	152.248	0	531	69.079	12.137	0.901	114.644	22076	1.176	0.851	0.945	1.07363
769	CEP170_KAN619-16_5.tif:0004-0257	0.743	148.881	0	500	80.962	18.552	0.912	110.562	21290	1.41	0.709	0.947	1.03541
770	CEP170_KAN619-16_5.tif:0005-0542	0.836	93.236	0	276	1.019	39.147	0.816	77.954	15011	1.191	0.839	0.892	0.730038
771	CEP170_KAN619-16_5.tif:0006-0586	0.737	118.648	0	336	55.722	42.238	0.966	87.494	16848	1.092	0.916	0.966	0.819378
772	CEP170_KAN619-16_5.tif:0007-0616	0.992	89.079	0	373	30.608	44.423	0.755	88.356	17014	1.729	0.578	0.895	0.827451
773	CEP170_KAN619-16_5.tif:0008-0618	1.065	133.922	0	560	81.799	44.572	0.89	142.573	27454	1.191	0.839	0.94	1.33519
774	CEP170_KAN619-16_5.tif:0009-0754	0.634	109.393	0	273	66.358	54.372	0.853	69.308	13346	1.612	0.62	0.914	0.649063
775	CEP170_KAN619-16_5.tif:0010-1023	1.257	131.69	0	524	24.559	73.687	0.827	165.5	31869	1.581	0.632	0.931	1.5499
776	CEP170_KAN619-16_5.tif:0011-1053	1.2	110.29	0	301	87.722	75.935	0.734	132.306	25477	1.984	0.504	0.887	1.23904
777	CEP170_KAN619-16_5.tif:0012-1075	0.997	65.974	0	278	62.119	77.536	0.849	65.782	12667	1.276	0.784	0.962	0.616041
778	CEP170_KAN619-16_5.tif:0013-1212	0.623	108.283	0	279	44.612	87.396	0.888	67.48	12994	1.438	0.695	0.916	0.631944
790	CEP170_KAN619-16_6.tif:0001-0047	0.55	106.368	0	262	46.741	3.372	0.944	58.553	11275	1.231	0.812	0.951	0.548343
791	CEP170_KAN619-16_6.tif:0002-0154	1.21	95.927	0	447	40.243	11.115	0.822	116.072	22351	1.364	0.733	0.891	1.08701
792	CEP170_KAN619-16_6.tif:0003-0525	1.096	87.578	0	348	38.377	37.839	0.881	95.964	18479	1.548	0.646	0.94	0.898699
793	CEP170_KAN619-16_6.tif:0004-0523	0.737	132.261	0	312	8.51	37.662	0.93	97.532	18781	1.222	0.818	0.947	0.913387
794	CEP170_KAN619-16_6.tif:0005-0644	0.836	125.497	0	379	27.796	46.431	0.969	104.928	20205	1.201	0.833	0.931	0.982641
795	CEP170_KAN619-16_6.tif:0006-0759	1.267	109.664	0	470	47.306	54.69	0.742	138.958	26758	1.889	0.529	0.887	1.30134
796	CEP170_KAN619-16_6.tif:0007-0948	1.132	102.67	0	374	69.146	68.282	0.837	116.233	22382	1.519	0.659	0.938	1.08852
797	CEP170_KAN619-16_6.tif:0008-1007	0.592	103.491	0	219	81.784	72.581	0.853	61.269	11798	1.638	0.611	0.919	0.573779
798	CEP170_KAN619-16_6.tif:0009-1131	0.722	127.18	0	408	70.326	81.491	0.82	91.804	17678	1.377	0.726	0.939	0.859744
799	CEP170_KAN619-16_6.tif:0010-1257	1.018	106	0	412	20.134	90.599	0.889	107.893	20776	1.15	0.869	0.929	1.01041
800	CEP170_KAN619-16_6.tif:0011-1263	0.81	122.16	0	327	80.025	91.038	0.79	98.966	19057	1.481	0.675	0.872	0.92681
										20561.9				1

## Sheet: KAN619
Exp. number	Cell line	Gene induced	Culture condition, fixation condition	rabbit-Alexa488	mouse IgG1-Alexa568	mouse IgG2b-Alexa647	Nuclear stain	Date	Replicate
KAN619-1	RPE-BFP-Cas9 pMCB306 (pool)		Serum starved for 24 hours. Fixed in 100% methanol at -20C for 5 minutes.	SCLT1, HPA036561, SIGMA, 1:500	CEP170, Invitrogen, 41-3200, 1:1000	Ac-Tub, 6B-11, Santa Cruz, 1:1000	DAPI	No.6	2021-03-04
KAN619-2	RPE-BFP-Cas9 CEP164KO (pool)		Serum starved for 24 hours. Fixed in 100% methanol at -20C for 5 minutes.	SCLT1, HPA036561, SIGMA, 1:500	CEP170, Invitrogen, 41-3200, 1:1000	Ac-Tub, 6B-11, Santa Cruz, 1:1000	DAPI	No.6	2021-03-04
KAN619-3	RPE-BFP-Cas9 CEP83 KO (pool)		Serum starved for 24 hours. Fixed in 100% methanol at -20C for 5 minutes.	SCLT1, HPA036561, SIGMA, 1:500	CEP170, Invitrogen, 41-3200, 1:1000	Ac-Tub, 6B-11, Santa Cruz, 1:1000	DAPI	No.6	2021-03-04
KAN619-4	RPE-BFP-Cas9 SCLT1 KO (pool)		Serum starved for 24 hours. Fixed in 100% methanol at -20C for 5 minutes.	SCLT1, HPA036561, SIGMA, 1:500	CEP170, Invitrogen, 41-3200, 1:1000	Ac-Tub, 6B-11, Santa Cruz, 1:1000	DAPI	No.6	2021-03-04
KAN619-5	RPE-BFP-Cas9 FBF1 KO (pool)		Serum starved for 24 hours. Fixed in 100% methanol at -20C for 5 minutes.	SCLT1, HPA036561, SIGMA, 1:500	CEP170, Invitrogen, 41-3200, 1:1000	Ac-Tub, 6B-11, Santa Cruz, 1:1000	DAPI	No.6	2021-03-04
KAN619-6	RPE-BFP-Cas9 CEP89KO (pool)		Serum starved for 24 hours. Fixed in 100% methanol at -20C for 5 minutes.	SCLT1, HPA036561, SIGMA, 1:500	CEP170, Invitrogen, 41-3200, 1:1000	Ac-Tub, 6B-11, Santa Cruz, 1:1000	DAPI	No.6	2021-03-04
KAN619-7	RPE-BFP-Cas9 CCDC92 KO (pool)		Serum starved for 24 hours. Fixed in 100% methanol at -20C for 5 minutes.	SCLT1, HPA036561, SIGMA, 1:500	CEP170, Invitrogen, 41-3200, 1:1000	Ac-Tub, 6B-11, Santa Cruz, 1:1000	DAPI	No.6	2021-03-04
KAN619-8	RPE-BFP-Cas9 ANKRD26 KO (pool)		Serum starved for 24 hours. Fixed in 100% methanol at -20C for 5 minutes.	SCLT1, HPA036561, SIGMA, 1:500	CEP170, Invitrogen, 41-3200, 1:1000	Ac-Tub, 6B-11, Santa Cruz, 1:1000	DAPI	No.6	2021-03-04
KAN619-9	RPE-BFP-Cas9 TTBK2 KO (pool)		Serum starved for 24 hours. Fixed in 100% methanol at -20C for 5 minutes.	SCLT1, HPA036561, SIGMA, 1:500	CEP170, Invitrogen, 41-3200, 1:1000	Ac-Tub, 6B-11, Santa Cruz, 1:1000	DAPI	No.6	2021-03-04
KAN619-10	RPE-BFP-Cas9 INPP5E KO (pool)		Serum starved for 24 hours. Fixed in 100% methanol at -20C for 5 minutes.	SCLT1, HPA036561, SIGMA, 1:500	CEP170, Invitrogen, 41-3200, 1:1000	Ac-Tub, 6B-11, Santa Cruz, 1:1000	DAPI	No.6	2021-03-04
KAN619-11	RPE-BFP-Cas9 Kiz KO (pool)		Serum starved for 24 hours. Fixed in 100% methanol at -20C for 5 minutes.	SCLT1, HPA036561, SIGMA, 1:500	CEP170, Invitrogen, 41-3200, 1:1000	Ac-Tub, 6B-11, Santa Cruz, 1:1000	DAPI	No.6	2021-03-04
KAN619-12	RPE-BFP-Cas9 LRRC45 KO (pool)		Serum starved for 24 hours. Fixed in 100% methanol at -20C for 5 minutes.	SCLT1, HPA036561, SIGMA, 1:500	CEP170, Invitrogen, 41-3200, 1:1000	Ac-Tub, 6B-11, Santa Cruz, 1:1000	DAPI	No.6	2021-03-04
KAN619-13	RPE-BFP-Cas9 NCS1 KO (pool)		Serum starved for 24 hours. Fixed in 100% methanol at -20C for 5 minutes.	SCLT1, HPA036561, SIGMA, 1:500	CEP170, Invitrogen, 41-3200, 1:1000	Ac-Tub, 6B-11, Santa Cruz, 1:1000	DAPI	No.6	2021-03-04
KAN619-14	RPE-BFP-Cas9 C3orf14 KO (pool)		Serum starved for 24 hours. Fixed in 100% methanol at -20C for 5 minutes.	SCLT1, HPA036561, SIGMA, 1:500	CEP170, Invitrogen, 41-3200, 1:1000	Ac-Tub, 6B-11, Santa Cruz, 1:1000	DAPI	No.6	2021-03-04
KAN619-15	RPE-BFP-Cas9 FOP KO (pool)		Serum starved for 24 hours. Fixed in 100% methanol at -20C for 5 minutes.	SCLT1, HPA036561, SIGMA, 1:500	CEP170, Invitrogen, 41-3200, 1:1000	Ac-Tub, 6B-11, Santa Cruz, 1:1000	DAPI	No.6	2021-03-04
KAN619-16	RPE-BFP-Cas9 sgSafe (pool)		Serum starved for 24 hours. Fixed in 100% methanol at -20C for 5 minutes.	SCLT1, HPA036561, SIGMA, 1:500	CEP170, Invitrogen, 41-3200, 1:1000	Ac-Tub, 6B-11, Santa Cruz, 1:1000	DAPI	No.6	2021-03-04
