# Supplementary material for: A hierarchical pathway for assembly of the distal appendages that organize primary cilia
Source: eLife. 2025 Jan 30;14:e85999. doi: 10.7554/eLife.85999 (PMC11984956; doi:10.7554/eLife.85999)
Supplement: Figure 3—figure supplement 1—source data 1. [file elife-85999-fig3-figsupp1-data1.xlsx]

## Sheet: Sheet1
Exp. number	Cell line	Gene induced	Culture condition, fixation condition	rabbit-Alexa488	mouse IgG1-Alexa568	mouse IgG2b-Alexa647	Nuclear stain	Date	Replicate
Fig.3S1A
KAN611-1	RPE-BFP-Cas9 pMCB306 (pool)		Confluent, Fixed in 4% PFA at RT for 15 minutes.	Myosin Va, sc-365986, Santa Cruz, 1:1000	Rab34, 27435-1-AP, Proteintech, 1:1000	CEP170, Invitrogen, 41-3200, 1:1000	DAPI	No.6	2021-03-01
KAN611-3	RPE-BFP-Cas9 CEP83 KO (pool)		Confluent, Fixed in 4% PFA at RT for 15 minutes.	Myosin Va, sc-365986, Santa Cruz, 1:1000	Rab34, 27435-1-AP, Proteintech, 1:1000	CEP170, Invitrogen, 41-3200, 1:1000	DAPI	No.6	2021-03-01
Fig.3S1B
KAN441-1	RPE-BFP-Cas9 pMCB306 (pool)		Fixed in 4% PFA, confluent	Rab34, sc-376710, Santa Cruz, 1:1000	CEP164, HPA037605, SIGMA, 1:1000		DAPI	2019-02-11
KAN441-2	RPE-BFP-Cas9 Rab34KO (pool)		Fixed in 4% PFA, confluent	Rab34, sc-376710, Santa Cruz, 1:1000	CEP164, HPA037605, SIGMA, 1:1000		DAPI	2019-02-11
Fig.3S1C
KAN441-5	RPE-BFP-Cas9 pMCB306 (pool)		Fixed in 4% PFA, confluent	Myosin Va, sc-365986, Santa Cruz, 1:1000	CEP164, HPA037605, SIGMA, 1:1000		DAPI	2019-02-11
KAN441-7	RPE-BFP-Cas9 Myo5AKO (pool)		Fixed in 4% PFA, confluent	Myosin Va, sc-365986, Santa Cruz, 1:1000	CEP164, HPA037605, SIGMA, 1:1000		DAPI	2019-02-11
