# Supplementary material for: A hierarchical pathway for assembly of the distal appendages that organize primary cilia
Source: eLife. 2025 Jan 30;14:e85999. doi: 10.7554/eLife.85999 (PMC11984956; doi:10.7554/eLife.85999)
Supplement: Figure 3—figure supplement 2—source data 1. [file elife-85999-fig3-figsupp2-data1.xlsx]

## Sheet: Raw Data
Subconfluent	cell counts	Rab34+	Confluent	cell counts	Rab34+	Subconfluent	cell counts	Rab34+	Confluent	cell counts	Rab34+
KAN395-1	10	3	KAN395-2	12	4	KAN395-8	7	4	KAN395-9	15	5
2	6	2	2	16	6	2	9	1	2	9	5
3	7	3	3	10	4	3	9	2	3	8	4
4	9	8	4	14	8	4	6	2	4	10	1							empty					AVERAGE	S.D.
5	10	4	5	10	2	5	5	2	5	13	7						RPE-hTERT	Asynchronus	48	30.2326			39.1163	12.5635
6	8	4	6	10	4	6	7	2	6	11	5						RPE-hTERT	confluent	38.8889	40.9091			39.899	1.4285
7			7			7			7
8			8			8			8
9			9			9			9
10			10			10			10
	50	24		72	28		43	13		66	27
	48			38.8889			30.2326			40.9091

## Sheet: Immunofluorescence condition
Experimental number	Cell	Condition	Fixation	Primary Antibody for 488 channel	Primary Antibody for 568 channel	Primary Antibody for 647 channel	Nuclear Stain
KAN395-1	RPE-hTERT	Subconfluent	Fixed in 4% PFA at RT for 15 minutes	Rab34, 27435-1-AP, Proteintech, 1:1000	CEP164, sc-515403, Santa Cruz, 1:500	FGFR1OP, H00011116-M01, NOVUS, 1:1000	DAPI		Replicate 1
KAN395-2	RPE-hTERT	confluent	Fixed in 4% PFA at RT for 15 minutes	Rab34, 27435-1-AP, Proteintech, 1:1000	CEP164, sc-515403, Santa Cruz, 1:500	FGFR1OP, H00011116-M01, NOVUS, 1:1000	DAPI		Replicate 1
KAN395-8	RPE-hTERT	Subconfluent	Fixed in 4% PFA at RT for 15 minutes	Rab34, 27435-1-AP, Proteintech, 1:1000	CEP164, sc-515403, Santa Cruz, 1:500	FGFR1OP, H00011116-M01, NOVUS, 1:1000	DAPI		Replicate 2
KAN395-9	RPE-hTERT	confluent	Fixed in 4% PFA at RT for 15 minutes	Rab34, 27435-1-AP, Proteintech, 1:1000	CEP164, sc-515403, Santa Cruz, 1:500	FGFR1OP, H00011116-M01, NOVUS, 1:1000	DAPI		Replicate 2
