# Supplementary material for: A hierarchical pathway for assembly of the distal appendages that organize primary cilia
Source: eLife. 2025 Jan 30;14:e85999. doi: 10.7554/eLife.85999 (PMC11984956; doi:10.7554/eLife.85999)
Supplement: Figure 3—figure supplement 2—source data 2. [file elife-85999-fig3-figsupp2-data2.xlsx]

## Sheet: Raw data and statistics
Confluent											Figure 3-sigur esupplement 2D
	cell counts	Myo5A (-) Rab34 (+) dot	Myo5A (+) Rab34 (-) dot	Myo5A (+) Rab34 (+) dot	Myo5A (-) Rab34 (+) ext	Myo5A (+) Rab34 (-) ext	Myo5A (+) Rab34 (+) ext				Myo5A positive centriole
KAN669-1	21	3		6	1
2	24	3	1	7			2				0 hour				average	SEM		Within each row, compare columns (simple effects within rows)
3	17			5			1				Myo5A negative	66.4634	61.8056	68.4211	64.1345	2.32893
4	15		1	3							Myo5A positive	33.5366	38.1944	31.5789	35.8655	2.32893		Number of families	2
5	22			8														Number of comparisons per family	3
6	20	1	1	3	1		1											Alpha	0.05
7	25	2		4			1
8	20			11							3 hour							Tukey's multiple comparisons test	Mean Diff.	95.00% CI of diff.	Below threshold?	Summary	Adjusted P Value
9
10											Myo5A negative	76.0331	70.9302	57.7982	73.4816	2.55141		Myo5A negative
											Myo5A positive	23.9669	29.0698	42.2018	26.5184	2.55141		Confluent vs. 3 hour serum starvation	-2.69	-15.29 to 9.908	No	ns	0.8384
	164	9	3	47	2	0	5											Confluent vs. 6 hour serum starvation	-15.31	-27.91 to -2.715	Yes	*	0.0179
																		3 hour serum starvation vs. 6 hour serum starvation	-12.62	-25.22 to -0.02420	Yes	*	0.0496
	cell counts	Myo5A (-) Rab34 (+) dot	Myo5A (+) Rab34 (-) dot	Myo5A (+) Rab34 (+) dot	Myo5A (-) Rab34 (+) ext	Myo5A (+) Rab34 (-) ext	Myo5A (+) Rab34 (+) ext											Myo5A positive
KAN669-2	20	3	1	7							6 hour							Confluent vs. 3 hour serum starvation	2.69	-9.908 to 15.29	No	ns	0.8384
2	16		1	6														Confluent vs. 6 hour serum starvation	15.31	2.715 to 27.91	Yes	*	0.0179
3	21	1		7			1				Myo5A negative	80.315	81.4159	80.8989	80.8654	0.550484		3 hour serum starvation vs. 6 hour serum starvation	12.62	0.02420 to 25.22	Yes	*	0.0496
4	15	1		4							Myo5A positive	19.685	18.5841	19.1011	19.1346	0.550484
5	15	1	1	4
6	23	2	1	8			1
7	18	2	2	3			2
8	16			6	1
9
10
	144	10	6	45	1
	144	10	6	45	1	0	4
											Figure 3-sigur esupplement 2E
											Rab34 positive centriole							Within each row, compare columns (simple effects within rows)
	cell counts	Myo5A (-) Rab34 (+) dot	Myo5A (+) Rab34 (-) dot	Myo5A (+) Rab34 (+) dot	Myo5A (-) Rab34 (+) ext	Myo5A (+) Rab34 (-) ext	Myo5A (+) Rab34 (+) ext
KAN669-3	13	2		3			1				0 hour				average	SEM		Number of families	2
2	20	1	1	6							Rab34 negative	61.5854	58.3333	63.1579	59.9593	1.62602		Number of comparisons per family	3
3	18	2	1	6							Rab34 positive	38.4146	41.6667	36.8421	40.0407	1.62602		Alpha	0.05
4	15	1		4			1
5	20	2	1	4			1											Tukey's multiple comparisons test	Mean Diff.	95.00% CI of diff.	Below threshold?	Summary	Adjusted P Value
6	19	2	1	4
7	16			5							3 hour							Rab34 negative
8	12	1		3														Confluent vs. 3 hour serum starvation	-10.15	-16.01 to -4.299	Yes	**	0.0016
9											Rab34 negative	73.5537	72.093	67.8899	72.8234	0.730348		Confluent vs. 6 hour serum starvation	-17.42	-23.27 to -11.56	Yes	****	<0.0001
10											Rab34 positive	26.4463	27.907	32.1101	27.1766	0.730348		3 hour serum starvation vs. 6 hour serum starvation	-7.262	-13.12 to -1.407	Yes	*	0.0159
	133	11	4	35	0
	133	11	4	35	0	0	3											Rab34 positive
																		Confluent vs. 3 hour serum starvation	10.15	4.299 to 16.01	Yes	**	0.0016
																		Confluent vs. 6 hour serum starvation	17.42	11.56 to 23.27	Yes	****	<0.0001
											6 hour							3 hour serum starvation vs. 6 hour serum starvation	7.262	1.407 to 13.12	Yes	*	0.0159
											Rab34 negative	76.378	81.4159	77.5281	78.8969	2.51899
											Rab34 positive	23.622	18.5841	22.4719	21.1031	2.51899
3 hours serum starvation
	cell counts	Myo5A (-) Rab34 (+) dot	Myo5A (+) Rab34 (-) dot	Myo5A (+) Rab34 (+) dot	Myo5A (-) Rab34 (+) ext	Myo5A (+) Rab34 (-) ext	Myo5A (+) Rab34 (+) ext
KAN684-1	13	1		2
2	15		1	2
3	17			4	1	1
4	14			3
5	12		1	4			2
6	18	1		3
7	16	1		3	1
8	16	1		1			2
9
10
	121	4	2	22	2	1	4
	cell counts	Myo5A (-) Rab34 (+) dot	Myo5A (+) Rab34 (-) dot	Myo5A (+) Rab34 (+) dot	Myo5A (-) Rab34 (+) ext	Myo5A (+) Rab34 (-) ext	Myo5A (+) Rab34 (+) ext
KAN684-2	14	1	2	2			1
2	16			4			2
3	13	2		1
4	14	2	1	1			2
5	16		1	3
6	13		2	3
7
8
9
10
	86	5	6	14	0
	86	5	6	14	0	0	5
	cell counts	Myo5A (-) Rab34 (+) dot	Myo5A (+) Rab34 (-) dot	Myo5A (+) Rab34 (+) dot	Myo5A (-) Rab34 (+) ext	Myo5A (+) Rab34 (-) ext	Myo5A (+) Rab34 (+) ext
KAN684-3	16			6			1
2	14		4	3
3	18	1	2	4			1
4	11			3	1
5	10	1	2	2			1
6	10		3	1
7	13		1	5
8	17		2	5
9
10
	109	2	14	29	1
	109	2	14	29	1	0	3
6 hours serum starvation
	cell counts	Myo5A (-) Rab34 (+) dot	Myo5A (+) Rab34 (-) dot	Myo5A (+) Rab34 (+) dot	Myo5A (-) Rab34 (+) ext	Myo5A (+) Rab34 (-) ext	Myo5A (+) Rab34 (+) ext
KAN684-4	17	1		4			1
2	14			3			1
3	13		1	4
4	15	1	1	2
5	12
6	16	1		1			1
7	22	3		3			1
8	18			2	1
9
10
	127	6	2	19	1	0	4
	cell counts	Myo5A (-) Rab34 (+) dot	Myo5A (+) Rab34 (-) dot	Myo5A (+) Rab34 (+) dot	Myo5A (-) Rab34 (+) ext	Myo5A (+) Rab34 (-) ext	Myo5A (+) Rab34 (+) ext
KAN684-5	14			1
2	16			2
3	12			1
4	13			2			1
5	13	2	1	2			1
6	14	1		2			2
7	16		2	1			1
8	15			1			1
9
10
	113	3	3	12	0
	113	3	3	12	0	0	6
	cell counts	Myo5A (-) Rab34 (+) dot	Myo5A (+) Rab34 (-) dot	Myo5A (+) Rab34 (+) dot	Myo5A (-) Rab34 (+) ext	Myo5A (+) Rab34 (-) ext	Myo5A (+) Rab34 (+) ext
KAN684-6	10	2		3
2	14	1
3	18			4	1
4	12		1	1
5	14	1	1	2
6	10			1			1
7	11			1			2
8
9
10
	89	4	2	12	1
	89	4	2	12	1	0	3
