# Supplementary material for: A hierarchical pathway for assembly of the distal appendages that organize primary cilia
Source: eLife. 2025 Jan 30;14:e85999. doi: 10.7554/eLife.85999 (PMC11984956; doi:10.7554/eLife.85999)
Supplement: Figure 3—figure supplement 2—source data 3. [file elife-85999-fig3-figsupp2-data3.xlsx]

## Sheet: Raw data and statistics
Confluent
	cell counts	EHD1 (-) Rab34 (+) dot	EHD1 (+) Rab34 (-) dot	EHD1 (+) Rab34 (+) dot	EHD1 (-) Rab34 (+) ext	EHD1 (+) Rab34 (-) ext	EHD1 (+) Rab34 (+) ext
KAN670-1	16	5									EHD1 positive centriole
2	14	5
3	20	6									0 hour				average	SEM		Within each row, compare columns (simple effects within rows)
4	16	5									EHD1 negative	99.2806	97.3684	93.1298	98.3245	0.956077
5	21	7									EHD1 positive	0.719424	2.63158	6.87023	1.6755	0.956077		Number of families	2
6	18	4																Number of comparisons per family	3
7	20	9																Alpha	0.05
8	14	3	1
9											3 hour							Tukey's multiple comparisons test	Mean Diff.	95.00% CI of diff.	Below threshold?	Summary	Adjusted P Value
10
											EHD1 negative	95	94	98.2906	94.5	0.5		Row 1
	139	44	1	0	0	0	0				EHD1 positive	5	6	1.7094	5.5	0.5		Confluent vs. 3 hour serum starvation	0.8294	-5.082 to 6.740	No	ns	0.9261
																		Confluent vs. 6 hour serum starvation	3.659	-2.252 to 9.570	No	ns	0.263
																		3 hour serum starvation vs. 6 hour serum starvation	2.83	-3.081 to 8.741	No	ns	0.4337
	cell counts	EHD1 (-) Rab34 (+) dot	EHD1 (+) Rab34 (-) dot	EHD1 (+) Rab34 (+) dot	EHD1 (-) Rab34 (+) ext	EHD1 (+) Rab34 (-) ext	EHD1 (+) Rab34 (+) ext
KAN670-2	15	4			1													Row 2
2											6 hour							Confluent vs. 3 hour serum starvation	-0.8294	-6.740 to 5.082	No	ns	0.9261
3	15	4					1											Confluent vs. 6 hour serum starvation	-3.659	-9.570 to 2.252	No	ns	0.263
4	18	5									EHD1 negative	93.0693	90.1961	95.5357	91.6327	1.43661		3 hour serum starvation vs. 6 hour serum starvation	-2.83	-8.741 to 3.081	No	ns	0.4337
5	17	9					1				EHD1 positive	6.93069	9.80392	4.46429	8.36731	1.43661
6	15	4	1
7	17	4			1
8	17	4			2
9
10
	114	34	1	0	4
	114	34	1	0	4	0	2
	cell counts	EHD1 (-) Rab34 (+) dot	EHD1 (+) Rab34 (-) dot	EHD1 (+) Rab34 (+) dot	EHD1 (-) Rab34 (+) ext	EHD1 (+) Rab34 (-) ext	EHD1 (+) Rab34 (+) ext
KAN670-3	19	6
2	15	1	1	1
3	14	3	2
4	20	7
5	15	2		1			2
6	14	3	1	1	2
7	20	8
8	14	2
9
10
	131	32	4	3	2
	131	32	4	3	2	0	2
3 hours serum starvation
	cell counts	EHD1 (-) Rab34 (+) dot	EHD1 (+) Rab34 (-) dot	EHD1 (+) Rab34 (+) dot	EHD1 (-) Rab34 (+) ext	EHD1 (+) Rab34 (-) ext	EHD1 (+) Rab34 (+) ext
KAN681-1	19	3		1			1
2	15	3
3	12	7
4	15	3	1	1
5	12	2
6	16	3	1
7	18	3
8	13						1
9
10
	120	24	2	2	0	0	2
	cell counts	EHD1 (-) Rab34 (+) dot	EHD1 (+) Rab34 (-) dot	EHD1 (+) Rab34 (+) dot	EHD1 (-) Rab34 (+) ext	EHD1 (+) Rab34 (-) ext	EHD1 (+) Rab34 (+) ext
KAN681-2	13	1			2		1
2	12	4
3	11	1					1
4	15	2			2		1
5	10	3
6	12	3
7	15	1		3
8	12	3
9
10
	100	18	0	3	4
	100	18	0	3	4	0	3
	cell counts	EHD1 (-) Rab34 (+) dot	EHD1 (+) Rab34 (-) dot	EHD1 (+) Rab34 (+) dot	EHD1 (-) Rab34 (+) ext	EHD1 (+) Rab34 (-) ext	EHD1 (+) Rab34 (+) ext
KAN681-3	11	2
2	11	1			1
3	18	3
4	21	3	1				1
5	13
6	18	3
7	14	6
8	11	2			2
9
10
	117	20	1	0	3
	117	20	1	0	3	0	1
6 hours serum starvation
	cell counts	EHD1 (-) Rab34 (+) dot	EHD1 (+) Rab34 (-) dot	EHD1 (+) Rab34 (+) dot	EHD1 (-) Rab34 (+) ext	EHD1 (+) Rab34 (-) ext	EHD1 (+) Rab34 (+) ext
KAN681-1	10	1			2
2	9	1					1
3	14			1			1
4	14	3		1
5	12		1
6	13	3					1
7	16	3					1
8	13	1
9
10
	101	12	1	2	2	0	4
	cell counts	EHD1 (-) Rab34 (+) dot	EHD1 (+) Rab34 (-) dot	EHD1 (+) Rab34 (+) dot	EHD1 (-) Rab34 (+) ext	EHD1 (+) Rab34 (-) ext	EHD1 (+) Rab34 (+) ext
KAN681-2	11						1
2	11	3
3	13	2
4	14	2			1
5	10	2					1
6	12	2		1	1		1
7	13	2					2
8	18		1	1			2
9
10
	102	13	1	2	2
	102	13	1	2	2	0	7
	cell counts	EHD1 (-) Rab34 (+) dot	EHD1 (+) Rab34 (-) dot	EHD1 (+) Rab34 (+) dot	EHD1 (-) Rab34 (+) ext	EHD1 (+) Rab34 (-) ext	EHD1 (+) Rab34 (+) ext
KAN681-3	19	5		1
2	16	1			1
3	12	2
4	9	2
5	14	2					1
6	13	3	1
7	12	2					1
8	17	4		1
9
10
	112	21	1	2	1
	112	21	1	2	1	0	2
