# Supplementary material for: A hierarchical pathway for assembly of the distal appendages that organize primary cilia
Source: eLife. 2025 Jan 30;14:e85999. doi: 10.7554/eLife.85999 (PMC11984956; doi:10.7554/eLife.85999)
Supplement: Figure 3—figure supplement 2—source data 4. [file elife-85999-fig3-figsupp2-data4.xlsx]

## Sheet: Raw data and statistics
Confluent											0 hour				average	SEM
	cell counts	PACSIN2 (-) Rab34 (+) dot	PACSIN2 (+) Rab34 (-) dot	PACSIN2 (+) Rab34 (+) dot	PACSIN2 (-) Rab34 (+) ext	PACSIN2 (+) Rab34 (-) ext	PACSIN2 (+) Rab34 (+) ext				PACSIN2 negative	92.5926	94.7368	97.561	93.6647	1.07212
KAN671-1	16	6		1							PACSIN2 positive	7.40741	5.26316	2.43902	6.33528	1.07212
2	16	2	2	1
3	17	6			1
4	17	5
5	18	4		1			1				3 hour
6	13	3					2
7	18	5									PACSIN2 negative	90.0901	91.8919	89.4737	90.991	0.900901
8	20	4	1				1				PACSIN2 positive	9.90991	8.10811	10.5263	9.00901	0.900901
9
10
	135	35	3	3	1	0	4
											6 hour
	cell counts	PACSIN2 (-) Rab34 (+) dot	PACSIN2 (+) Rab34 (-) dot	PACSIN2 (+) Rab34 (+) dot	PACSIN2 (-) Rab34 (+) ext	PACSIN2 (+) Rab34 (-) ext	PACSIN2 (+) Rab34 (+) ext				PACSIN2 negative	87.3874	81.9672	83.9623	84.6773	2.71009
KAN670-2	19	5									PACSIN2 positive	12.6126	18.0328	16.0377	15.3227	2.71009
2	16	1	1	1			1
3	12	2
4	16	4	1
5	11	2					1
6	11	4	1								Within each row, compare columns (simple effects within rows)
7	15	7
8	14	10									Number of families	2
9											Number of comparisons per family	3
10											Alpha	0.05				N1	N2	q	DF
	114	35	3	1	0
	114	35	3	1	0	0	2				Tukey's multiple comparisons test	Mean Diff.	95.00% CI of diff.	Below threshold?	Summary
																3	3	3.434	12
											PACSIN2 negative					3	3	8.071	12
											Confluent vs. 3 hour serum starvation	4.478	-0.4417 to 9.398	No	ns	3	3	4.637	12
											Confluent vs. 6 hour serum starvation	10.52	5.605 to 15.44	Yes	***
	cell counts	PACSIN2 (-) Rab34 (+) dot	PACSIN2 (+) Rab34 (-) dot	PACSIN2 (+) Rab34 (+) dot	PACSIN2 (-) Rab34 (+) ext	PACSIN2 (+) Rab34 (-) ext	PACSIN2 (+) Rab34 (+) ext				3 hour serum starvation vs. 6 hour serum starvation	6.046	1.126 to 10.97	Yes	*
KAN670-3	12	3	1													3	3	3.434	12
2	11	3									PACSIN2 positive					3	3	8.071	12
3	19	3			1		1				Confluent vs. 3 hour serum starvation	-4.478	-9.398 to 0.4417	No	ns	3	3	4.637	12
4	17	6									Confluent vs. 6 hour serum starvation	-10.52	-15.44 to -5.605	Yes	***
5	17	3	1								3 hour serum starvation vs. 6 hour serum starvation	-6.046	-10.97 to -1.126	Yes	*
6	17	1
7	17	3
8	13	2									Test details	Mean 1	Mean 2	Mean Diff.	SE of diff.
9
10											PACSIN2 negative
	123	24	2	0	1						Confluent vs. 3 hour serum starvation	94.96	90.49	4.478	1.844
	123	24	2	0	1	0	1				Confluent vs. 6 hour serum starvation	94.96	84.44	10.52	1.844
											3 hour serum starvation vs. 6 hour serum starvation	90.49	84.44	6.046	1.844
											PACSIN2 positive
											Confluent vs. 3 hour serum starvation	5.037	9.515	-4.478	1.844
											Confluent vs. 6 hour serum starvation	5.037	15.56	-10.52	1.844
											3 hour serum starvation vs. 6 hour serum starvation	9.515	15.56	-6.046	1.844
3 hours serum starvation
	cell counts	PACSIN2 (-) Rab34 (+) dot	PACSIN2 (+) Rab34 (-) dot	PACSIN2 (+) Rab34 (+) dot	PACSIN2 (-) Rab34 (+) ext	PACSIN2 (+) Rab34 (-) ext	PACSIN2 (+) Rab34 (+) ext
KAN682-1	10	2		1			1
2	13	1
3	15	3					2
4	13	2	1		2		1
5	12	2		1
6	15		1			1	1
7	10	1		1
8	11	1			1
9	12				1
10
	111	12	2	3	4	1	5
	cell counts	PACSIN2 (-) Rab34 (+) dot	PACSIN2 (+) Rab34 (-) dot	PACSIN2 (+) Rab34 (+) dot	PACSIN2 (-) Rab34 (+) ext	PACSIN2 (+) Rab34 (-) ext	PACSIN2 (+) Rab34 (+) ext
KAN682-2	17	3		1
2	16	2	1	1
3	13	1					2
4	13	3				1
5	9	2
6	17	4		1
7	15	1		1			1
8	11	2
9
10
	111	18	1	4	0	1	3
	cell counts	PACSIN2 (-) Rab34 (+) dot	PACSIN2 (+) Rab34 (-) dot	PACSIN2 (+) Rab34 (+) dot	PACSIN2 (-) Rab34 (+) ext	PACSIN2 (+) Rab34 (-) ext	PACSIN2 (+) Rab34 (+) ext
KAN682-3	10	1		1			1
2	9	1					2
3	12	2		1
4	14	5		2			1
5	13	1		1
6	12	1		1		1
7	15	1					1
8	13	2
9	16	3
10
	114	17	0	6	0
	114	17	0	6	0	1	5
6 hours serum starvation
	cell counts	PACSIN2 (-) Rab34 (+) dot	PACSIN2 (+) Rab34 (-) dot	PACSIN2 (+) Rab34 (+) dot	PACSIN2 (-) Rab34 (+) ext	PACSIN2 (+) Rab34 (-) ext	PACSIN2 (+) Rab34 (+) ext
KAN682-4	16	5					1
2	17	2	2
3	15	2				1	2
4	19	1					3
5	14	2	2
6	9	2			1	1
7	8	2
8	13	1	1				1
9
10
	111	17	5	0	1	2	7
	cell counts	PACSIN2 (-) Rab34 (+) dot	PACSIN2 (+) Rab34 (-) dot	PACSIN2 (+) Rab34 (+) dot	PACSIN2 (-) Rab34 (+) ext	PACSIN2 (+) Rab34 (-) ext	PACSIN2 (+) Rab34 (+) ext
KAN682-5	19	2			1	2	1
2	17	6				3
3	14	3					1
4	13	2			2	1
5	16	1		1		1	1
6	13				1	3
7	11			1		2
8	19	1					5
9
10
	122	15	0	2	4
	122	15	0	2	4	12	8
	cell counts	PACSIN2 (-) Rab34 (+) dot	PACSIN2 (+) Rab34 (-) dot	PACSIN2 (+) Rab34 (+) dot	PACSIN2 (-) Rab34 (+) ext	PACSIN2 (+) Rab34 (-) ext	PACSIN2 (+) Rab34 (+) ext
KAN682-6	14	3		1			1
2	19	3	1			1
3	14	3		1		2	1
4	9	2	1
5	13	2				2
6	12	1					1
7	11	2		1		1
8	14	2				2	1
9
10
	106	18	2	3	0
	106	18	2	3	0	8	4
