# Supplementary material for: A hierarchical pathway for assembly of the distal appendages that organize primary cilia
Source: eLife. 2025 Jan 30;14:e85999. doi: 10.7554/eLife.85999 (PMC11984956; doi:10.7554/eLife.85999)
Supplement: Figure 3—figure supplement 3—source data 1. [file elife-85999-fig3-figsupp3-data1.xlsx]

## Sheet: Sheet1
Exp. number	Cell line	Gene induced	Culture condition, fixation condition	rabbit-Alexa488	mouse IgG1-Alexa568	mouse IgG2b-Alexa647	Nuclear stain	Date	Replicate
Fig.3S3A
KAN421-2	RPE-hTERT	Structured illumination	Fixed in 4% PFA, confluent	Rab34, sc-376710, Santa Cruz, 1:1000	CEP164, HPA037605, SIGMA, 1:1000	CEP170, Invitrogen, 41-3200, 1:1000		2018-12-17
Fig.3S3B-E
KAN421-3	RPE-hTERT	Structured illumination	Fixed in 4% PFA, confluent	Rab34, sc-376710, Santa Cruz, 1:1000	MyosinVa, NOVUS, NBP1-92156, 1:500	CEP170, Invitrogen, 41-3200, 1:1000		2018-12-17
Fig.3S3F-J
KAN505-1	RPE-BFP-Cas9 pMCB306 (pool)	Structured illumination	Fixed in 4% PFA, confluent	Rab34, sc-376710, Santa Cruz, 1:250	CEP164, 22227-1-AP, Proteintech, 1:1000	ARL13B, Santa Cruz, sc-515784, 1:500		2019-06-04
