# Supplementary material for: A hierarchical pathway for assembly of the distal appendages that organize primary cilia
Source: eLife. 2025 Jan 30;14:e85999. doi: 10.7554/eLife.85999 (PMC11984956; doi:10.7554/eLife.85999)
Supplement: Figure 3—source data 2. [file elife-85999-fig3-data2.xlsx]

## Sheet: Raw data
Confluent
	cell counts	Myo5A (-) Rab34 (+) dot	Myo5A (+) Rab34 (-) dot	Myo5A (+) Rab34 (+) dot	Myo5A (-) Rab34 (+) ext	Myo5A (+) Rab34 (-) ext	Myo5A (+) Rab34 (+) ext
KAN669-1	21	3		6	1				0 hour		Myo5A (-) Rab34(-)	Myo5A (-) Rab34 (+)	Myo5A (+) Rab34 (-)	Myo5A (+) Rab34 (+)		3 hour		Myo5A (-) Rab34(-)	Myo5A (-) Rab34 (+)	Myo5A (+) Rab34 (-)	Myo5A (+) Rab34 (+)			6 hour		Myo5A (-) Rab34(-)	Myo5A (-) Rab34 (+)	Myo5A (+) Rab34 (-)	Myo5A (+) Rab34 (+)
2	24	3	1	7			2			KAN669-1	59.7561	6.70732	1.82927	31.7073			KAN684-1	71.0744	4.95868	2.47934	21.4876				KAN684-4	74.8031	5.51181	1.5748	18.1102
3	17			5			1			KAN669-2	54.1667	7.63889	4.16667	34.0278			KAN684-2	65.1163	5.81395	6.97674	22.093				KAN684-5	78.7611	2.65487	2.65487	15.9292
4	15		1	3						KAN669-3	60.1504	8.27068	3.00752	28.5714			KAN684-3	55.0459	2.75229	12.844	29.3578				KAN684-6	75.2809	5.61798	2.24719	16.8539
5	22			8						average	58.0244	7.53896	3.00115	31.4355			average	63.7455	4.50831	7.43337	24.3128				average	76.2817	4.59489	2.15895	16.9645
6	20	1	1	3	1		1			SEM	1.93221	0.45406	0.674756	1.58096			SEM	4.67752	0.912061	3.00073	2.52854				SEM	1.24733	0.970493	0.314894	0.632031
7	25	2		4			1
8	20			11
9
10
																																Within each row, compare columns (simple effects within rows)
	164	9	3	47	2	0	5
																																Number of families	4
																																Number of comparisons per family	3
	cell counts	Myo5A (-) Rab34 (+) dot	Myo5A (+) Rab34 (-) dot	Myo5A (+) Rab34 (+) dot	Myo5A (-) Rab34 (+) ext	Myo5A (+) Rab34 (-) ext	Myo5A (+) Rab34 (+) ext																		0 hour							Alpha	0.05
KAN669-2	20	3	1	7																						KAN669-1	KAN669-2	KAN669-3	average	SEM
2	16		1	6																					Myo5A (-) Rab34(-)	59.7561	54.1667	60.1504	58.0244	1.93221		Tukey's multiple comparisons test	Mean Diff.	95.00% CI of diff.	Below threshold?	Summary	Adjusted P Value
3	21	1		7			1																		Myo5A (-) Rab34 (+)	6.70732	7.63889	8.27068	7.53896	0.45406
4	15	1		4																					Myo5A (+) Rab34 (-)	1.82927	4.16667	3.00752	3.00115	0.674756		Myo5A (-) Rab34(-)
5	15	1	1	4																					Myo5A (+) Rab34 (+)	31.7073	34.0278	28.5714	31.4355	1.58096		Confluent vs. 3 hour serum starvation	-5.721	-12.78 to 1.342	No	ns	0.1284
6	23	2	1	8			1																									Confluent vs. 6 hour serum starvation	-18.26	-25.32 to -11.19	Yes	****	<0.0001
7	18	2	2	3			2																		3 hour							3 hour serum starvation vs. 6 hour serum starvation	-12.54	-19.60 to -5.473	Yes	***	0.0005
8	16			6	1																					KAN684-1	KAN684-2	KAN684-3	average	SEM
9																									Myo5A (-) Rab34(-)	71.0744	65.1163	55.0459	63.7455	4.67752		Myo5A (-) Rab34 (+)
10																									Myo5A (-) Rab34 (+)	4.95868	5.81395	2.75229	4.50831	0.912061		Confluent vs. 3 hour serum starvation	3.031	-4.033 to 10.09	No	ns	0.5404
	144	10	6	45	1																				Myo5A (+) Rab34 (-)	2.47934	6.97674	12.844	7.43337	3.00073		Confluent vs. 6 hour serum starvation	2.944	-4.119 to 10.01	No	ns	0.559
	144	10	6	45	1	0	4																		Myo5A (+) Rab34 (+)	21.4876	22.093	29.3578	24.3128	2.52854		3 hour serum starvation vs. 6 hour serum starvation	-0.08658	-7.150 to 6.977	No	ns	0.9995
																																Myo5A (+) Rab34 (-)
																									6 hour							Confluent vs. 3 hour serum starvation	-4.432	-11.50 to 2.631	No	ns	0.2789
																										KAN684-4	KAN684-5	KAN684-6	average	SEM		Confluent vs. 6 hour serum starvation	0.8422	-6.221 to 7.906	No	ns	0.9524
	cell counts	Myo5A (-) Rab34 (+) dot	Myo5A (+) Rab34 (-) dot	Myo5A (+) Rab34 (+) dot	Myo5A (-) Rab34 (+) ext	Myo5A (+) Rab34 (-) ext	Myo5A (+) Rab34 (+) ext																		Myo5A (-) Rab34(-)	74.8031	78.7611	75.2809	76.2817	1.24733		3 hour serum starvation vs. 6 hour serum starvation	5.274	-1.789 to 12.34	No	ns	0.1707
KAN669-3	13	2		3			1																		Myo5A (-) Rab34 (+)	5.51181	2.65487	5.61798	4.59489	0.970493
2	20	1	1	6																					Myo5A (+) Rab34 (-)	1.5748	2.65487	2.24719	2.15895	0.314894		Myo5A (+) Rab34 (+)
3	18	2	1	6																					Myo5A (+) Rab34 (+)	18.1102	15.9292	16.8539	16.9645	0.632031		Confluent vs. 3 hour serum starvation	7.123	0.05934 to 14.19	Yes	*	0.0478
4	15	1		4			1																									Confluent vs. 6 hour serum starvation	14.47	7.408 to 21.53	Yes	****	<0.0001
5	20	2	1	4			1																									3 hour serum starvation vs. 6 hour serum starvation	7.348	0.2850 to 14.41	Yes	*	0.0403
6	19	2	1	4
7	16			5
8	12	1		3
9
10
	133	11	4	35	0
	133	11	4	35	0	0	3
3 hours serum starvation
	cell counts	Myo5A (-) Rab34 (+) dot	Myo5A (+) Rab34 (-) dot	Myo5A (+) Rab34 (+) dot	Myo5A (-) Rab34 (+) ext	Myo5A (+) Rab34 (-) ext	Myo5A (+) Rab34 (+) ext
KAN684-1	13	1		2
2	15		1	2
3	17			4	1	1
4	14			3
5	12		1	4			2
6	18	1		3
7	16	1		3	1
8	16	1		1			2
9
10
	121	4	2	22	2	1	4
	cell counts	Myo5A (-) Rab34 (+) dot	Myo5A (+) Rab34 (-) dot	Myo5A (+) Rab34 (+) dot	Myo5A (-) Rab34 (+) ext	Myo5A (+) Rab34 (-) ext	Myo5A (+) Rab34 (+) ext
KAN684-2	14	1	2	2			1
2	16			4			2
3	13	2		1
4	14	2	1	1			2
5	16		1	3
6	13		2	3
7
8
9
10
	86	5	6	14	0
	86	5	6	14	0	0	5
																									Myo5A positive centriole
																									0 hour				average	SEM		Within each row, compare columns (simple effects within rows)
	cell counts	Myo5A (-) Rab34 (+) dot	Myo5A (+) Rab34 (-) dot	Myo5A (+) Rab34 (+) dot	Myo5A (-) Rab34 (+) ext	Myo5A (+) Rab34 (-) ext	Myo5A (+) Rab34 (+) ext																		Myo5A negative	66.4634	61.8056	68.4211	64.1345	2.32893
KAN684-3	16			6			1																		Myo5A positive	33.5366	38.1944	31.5789	35.8655	2.32893		Number of families	2
2	14		4	3																												Number of comparisons per family	3
3	18	1	2	4			1																									Alpha	0.05
4	11			3	1
5	10	1	2	2			1																		3 hour							Tukey's multiple comparisons test	Mean Diff.	95.00% CI of diff.	Below threshold?	Summary	Adjusted P Value
6	10		3	1
7	13		1	5																					Myo5A negative	76.0331	70.9302	57.7982	73.4816	2.55141		Myo5A negative
8	17		2	5																					Myo5A positive	23.9669	29.0698	42.2018	26.5184	2.55141		Confluent vs. 3 hour serum starvation	-2.69	-15.29 to 9.908	No	ns	0.8384
9																																Confluent vs. 6 hour serum starvation	-15.31	-27.91 to -2.715	Yes	*	0.0179
10																																3 hour serum starvation vs. 6 hour serum starvation	-12.62	-25.22 to -0.02420	Yes	*	0.0496
	109	2	14	29	1
	109	2	14	29	1	0	3																									Myo5A positive
																									6 hour							Confluent vs. 3 hour serum starvation	2.69	-9.908 to 15.29	No	ns	0.8384
																																Confluent vs. 6 hour serum starvation	15.31	2.715 to 27.91	Yes	*	0.0179
																									Myo5A negative	80.315	81.4159	80.8989	80.8654	0.550484		3 hour serum starvation vs. 6 hour serum starvation	12.62	0.02420 to 25.22	Yes	*	0.0496
																									Myo5A positive	19.685	18.5841	19.1011	19.1346	0.550484
6 hours serum starvation
	cell counts	Myo5A (-) Rab34 (+) dot	Myo5A (+) Rab34 (-) dot	Myo5A (+) Rab34 (+) dot	Myo5A (-) Rab34 (+) ext	Myo5A (+) Rab34 (-) ext	Myo5A (+) Rab34 (+) ext
KAN684-4	17	1		4			1
2	14			3			1
3	13		1	4
4	15	1	1	2
5	12
6	16	1		1			1
7	22	3		3			1
8	18			2	1
9
10
	127	6	2	19	1	0	4
	cell counts	Myo5A (-) Rab34 (+) dot	Myo5A (+) Rab34 (-) dot	Myo5A (+) Rab34 (+) dot	Myo5A (-) Rab34 (+) ext	Myo5A (+) Rab34 (-) ext	Myo5A (+) Rab34 (+) ext
KAN684-5	14			1
2	16			2
3	12			1
4	13			2			1
5	13	2	1	2			1
6	14	1		2			2
7	16		2	1			1
8	15			1			1
9																									Rab34 positive centriole							Within each row, compare columns (simple effects within rows)
10
	113	3	3	12	0																				0 hour				average	SEM		Number of families	2
	113	3	3	12	0	0	6																		Rab34 negative	61.5854	58.3333	63.1579	59.9593	1.62602		Number of comparisons per family	3
																									Rab34 positive	38.4146	41.6667	36.8421	40.0407	1.62602		Alpha	0.05
																																Tukey's multiple comparisons test	Mean Diff.	95.00% CI of diff.	Below threshold?	Summary	Adjusted P Value
	cell counts	Myo5A (-) Rab34 (+) dot	Myo5A (+) Rab34 (-) dot	Myo5A (+) Rab34 (+) dot	Myo5A (-) Rab34 (+) ext	Myo5A (+) Rab34 (-) ext	Myo5A (+) Rab34 (+) ext																		3 hour							Rab34 negative
KAN684-6	10	2		3																												Confluent vs. 3 hour serum starvation	-10.15	-16.01 to -4.299	Yes	**	0.0016
2	14	1																							Rab34 negative	73.5537	72.093	67.8899	72.8234	0.730348		Confluent vs. 6 hour serum starvation	-17.42	-23.27 to -11.56	Yes	****	<0.0001
3	18			4	1																				Rab34 positive	26.4463	27.907	32.1101	27.1766	0.730348		3 hour serum starvation vs. 6 hour serum starvation	-7.262	-13.12 to -1.407	Yes	*	0.0159
4	12		1	1
5	14	1	1	2																												Rab34 positive
6	10			1			1																									Confluent vs. 3 hour serum starvation	10.15	4.299 to 16.01	Yes	**	0.0016
7	11			1			2																									Confluent vs. 6 hour serum starvation	17.42	11.56 to 23.27	Yes	****	<0.0001
8																									6 hour							3 hour serum starvation vs. 6 hour serum starvation	7.262	1.407 to 13.12	Yes	*	0.0159
9
10																									Rab34 negative	76.378	81.4159	77.5281	78.8969	2.51899
	89	4	2	12	1																				Rab34 positive	23.622	18.5841	22.4719	21.1031	2.51899
	89	4	2	12	1	0	3

## Sheet: IF condition
Exp. number	Cell line	Gene induced	Culture condition, fixation condition	rabbit-Alexa488	mouse IgG1-Alexa568	mouse IgG2b-Alexa647	Nuclear stain	Date	Replicate
Confluent
KAN669-1	RPE-hTERT		+ FBS for 24 hours, fixed in 4% PFA at RT for 15 minutes.	Myosin Va, sc-365986, Santa Cruz, 1:1000	Rab34, 27435-1-AP, Proteintech, 1:1000	CEP170, Invitrogen, 41-3200, 1:1000	DAPI	2021-05-21	No.1
KAN669-2	RPE-hTERT		+ FBS for 24 hours, fixed in 4% PFA at RT for 15 minutes.	Myosin Va, sc-365986, Santa Cruz, 1:1000	Rab34, 27435-1-AP, Proteintech, 1:1000	CEP170, Invitrogen, 41-3200, 1:1000	DAPI	2021-05-21	No.2
KAN669-3	RPE-hTERT		+ FBS for 24 hours, fixed in 4% PFA at RT for 15 minutes.	Myosin Va, sc-365986, Santa Cruz, 1:1000	Rab34, 27435-1-AP, Proteintech, 1:1000	CEP170, Invitrogen, 41-3200, 1:1000	DAPI	2021-05-21	No.3
serum starved for 3 hours
KAN684-1	RPE-hTERT		serum starved for 3 hours, fixed in 4% PFA at RT for 15 mintues	Myosin Va, sc-365986, Santa Cruz, 1:1000	Rab34, 27435-1-AP, Proteintech, 1:1000	CEP170, Invitrogen, 41-3200, 1:1000	DAPI
KAN684-2	RPE-hTERT		serum starved for 3 hours, fixed in 4% PFA at RT for 15 mintues	Myosin Va, sc-365986, Santa Cruz, 1:1000	Rab34, 27435-1-AP, Proteintech, 1:1000	CEP170, Invitrogen, 41-3200, 1:1000	DAPI
KAN684-3	RPE-hTERT		serum starved for 3 hours, fixed in 4% PFA at RT for 15 mintues	Myosin Va, sc-365986, Santa Cruz, 1:1000	Rab34, 27435-1-AP, Proteintech, 1:1000	CEP170, Invitrogen, 41-3200, 1:1000	DAPI
serum starved for 6 hours
KAN684-4	RPE-hTERT		serum starved for 6 hours, fixed in 4% PFA at RT for 15 mintues	Myosin Va, sc-365986, Santa Cruz, 1:1000	Rab34, 27435-1-AP, Proteintech, 1:1000	CEP170, Invitrogen, 41-3200, 1:1000	DAPI
KAN684-5	RPE-hTERT		serum starved for 6 hours, fixed in 4% PFA at RT for 15 mintues	Myosin Va, sc-365986, Santa Cruz, 1:1000	Rab34, 27435-1-AP, Proteintech, 1:1000	CEP170, Invitrogen, 41-3200, 1:1000	DAPI
KAN684-6	RPE-hTERT		serum starved for 6 hours, fixed in 4% PFA at RT for 15 mintues	Myosin Va, sc-365986, Santa Cruz, 1:1000	Rab34, 27435-1-AP, Proteintech, 1:1000	CEP170, Invitrogen, 41-3200, 1:1000	DAPI

## Sheet: Statistics
Within each row, compare columns (simple effects within rows)
Number of families	4
Number of comparisons per family	3
Alpha	0.05
Two-way ANOVA
Tukey's multiple comparisons test	Mean Diff.	95.00% CI of diff.	Below threshold?	Summary	Adjusted P Value
Myo5A (-) Rab34(-)
Confluent vs. 3 hour serum starvation	-5.721	-12.78 to 1.342	No	ns	0.1284
Confluent vs. 6 hour serum starvation	-18.26	-25.32 to -11.19	Yes	****	<0.0001
3 hour serum starvation vs. 6 hour serum starvation	-12.54	-19.60 to -5.473	Yes	***	0.0005
Myo5A (-) Rab34 (+)
Confluent vs. 3 hour serum starvation	3.031	-4.033 to 10.09	No	ns	0.5404
Confluent vs. 6 hour serum starvation	2.944	-4.119 to 10.01	No	ns	0.559
3 hour serum starvation vs. 6 hour serum starvation	-0.08658	-7.150 to 6.977	No	ns	0.9995
Myo5A (+) Rab34 (-)
Confluent vs. 3 hour serum starvation	-4.432	-11.50 to 2.631	No	ns	0.2789
Confluent vs. 6 hour serum starvation	0.8422	-6.221 to 7.906	No	ns	0.9524
3 hour serum starvation vs. 6 hour serum starvation	5.274	-1.789 to 12.34	No	ns	0.1707
Myo5A (+) Rab34 (+)
Confluent vs. 3 hour serum starvation	7.123	0.05934 to 14.19	Yes	*	0.0478
Confluent vs. 6 hour serum starvation	14.47	7.408 to 21.53	Yes	****	<0.0001
3 hour serum starvation vs. 6 hour serum starvation	7.348	0.2850 to 14.41	Yes	*	0.0403
