# Supplementary material for: A hierarchical pathway for assembly of the distal appendages that organize primary cilia
Source: eLife. 2025 Jan 30;14:e85999. doi: 10.7554/eLife.85999 (PMC11984956; doi:10.7554/eLife.85999)
Supplement: Figure 3—source data 3. [file elife-85999-fig3-data3.xlsx]

## Sheet: Raw data
Confluent
	cell counts	EHD1 (-) Rab34 (+) dot	EHD1 (+) Rab34 (-) dot	EHD1 (+) Rab34 (+) dot	EHD1 (-) Rab34 (+) ext	EHD1 (+) Rab34 (-) ext	EHD1 (+) Rab34 (+) ext
KAN670-1	16	5							0 hour		EHD1 (-) Rab34(-)	EHD1 (-) Rab34 (+)	EHD1 (+) Rab34 (-)	EHD1 (+) Rab34 (+)		3 hour		EHD1 (-) Rab34(-)	EHD1 (-) Rab34 (+)	EHD1 (+) Rab34 (-)	EHD1 (+) Rab34 (+)			6 hour		EHD1 (-) Rab34(-)	EHD1 (-) Rab34 (+)	EHD1 (+) Rab34 (-)	EHD1 (+) Rab34 (+)
2	14	5								KAN670-1	67.6259	31.6547	0.719424	0			KAN681-1	75	20	1.66667	3.33333				KAN681-4	79.2079	13.8614	0.990099	5.94059
3	20	6								KAN670-2	64.0351	33.3333	0.877193	1.75439			KAN681-2	72	22	0	6				KAN681-5	75.4902	14.7059	0.980392	8.82353
4	16	5								KAN670-3	67.1756	25.9542	3.05344	3.81679			KAN681-3	78.6325	19.6581	0.854701	0.854701				KAN681-6	75.8929	19.6429	0.892857	3.57143
5	21	7								average	66.2789	30.3141	1.55002	1.85706			average	75.2108	20.5527	0.840456	3.39601				average	76.8637	16.07	0.954449	6.11185
6	18	4								SEM	1.12939	2.23315	0.753087	1.10301			SEM	1.91753	0.730346	0.481178	1.48565				SEM	1.17788	1.80297	0.0309234	1.51857
7	20	9
8	14	3	1
9
10
	139	44	1	0	0	0	0
																																Within each row, compare columns (simple effects within rows)
	cell counts	EHD1 (-) Rab34 (+) dot	EHD1 (+) Rab34 (-) dot	EHD1 (+) Rab34 (+) dot	EHD1 (-) Rab34 (+) ext	EHD1 (+) Rab34 (-) ext	EHD1 (+) Rab34 (+) ext																		0 hour							Number of families	4
KAN670-2	15	4			1																					KAN670-1	KAN670-2	KAN670-3	average	SEM		Number of comparisons per family	3
2																									EHD1 (-) Rab34(-)	67.6259	64.0351	67.1756	66.2789	1.12939		Alpha	0.05
3	15	4					1																		EHD1 (-) Rab34 (+)	31.6547	33.3333	25.9542	30.3141	2.23315
4	18	5																							EHD1 (+) Rab34 (-)	0.719424	0.877193	3.05344	1.55002	0.753087		Tukey's multiple comparisons test	Mean Diff.	95.00% CI of diff.	Below threshold?	Summary	Adjusted P Value
5	17	9					1																		EHD1 (+) Rab34 (+)	0	1.75439	3.81679	1.85706	1.10301
6	15	4	1																													EHD1 (-) Rab34(-)
7	17	4			1																				3 hour							Confluent vs. 3 hour serum starvation	-8.932	-13.67 to -4.189	Yes	***	0.0003
8	17	4			2																					KAN681-1	KAN681-2	KAN681-3	average	SEM		Confluent vs. 6 hour serum starvation	-10.58	-15.33 to -5.842	Yes	****	<0.0001
9																									EHD1 (-) Rab34(-)	75	72	78.6325	75.2108	1.91753		3 hour serum starvation vs. 6 hour serum starvation	-1.653	-6.396 to 3.090	No	ns	0.6638
10																									EHD1 (-) Rab34 (+)	20	22	19.6581	20.5527	0.730346
	114	34	1	0	4																				EHD1 (+) Rab34 (-)	1.66667	0	0.854701	0.840456	0.481178		EHD1 (-) Rab34 (+)
	114	34	1	0	4	0	2																		EHD1 (+) Rab34 (+)	3.33333	6	0.854701	3.39601	1.48565		Confluent vs. 3 hour serum starvation	9.761	5.019 to 14.50	Yes	****	<0.0001
																																Confluent vs. 6 hour serum starvation	14.24	9.501 to 18.99	Yes	****	<0.0001
																																3 hour serum starvation vs. 6 hour serum starvation	4.483	-0.2600 to 9.225	No	ns	0.0664
																									6 hour
																										KAN681-4	KAN681-5	KAN681-6	average	SEM		EHD1 (+) Rab34 (-)
	cell counts	EHD1 (-) Rab34 (+) dot	EHD1 (+) Rab34 (-) dot	EHD1 (+) Rab34 (+) dot	EHD1 (-) Rab34 (+) ext	EHD1 (+) Rab34 (-) ext	EHD1 (+) Rab34 (+) ext																		EHD1 (-) Rab34(-)	79.2079	75.4902	75.8929	76.8637	1.17788		Confluent vs. 3 hour serum starvation	0.7096	-4.033 to 5.452	No	ns	0.9262
KAN670-3	19	6																							EHD1 (-) Rab34 (+)	13.8614	14.7059	19.6429	16.07	1.80297		Confluent vs. 6 hour serum starvation	0.5956	-4.147 to 5.338	No	ns	0.9474
2	15	1	1	1																					EHD1 (+) Rab34 (-)	0.990099	0.980392	0.892857	0.954449	0.0309234		3 hour serum starvation vs. 6 hour serum starvation	-0.114	-4.857 to 4.629	No	ns	0.998
3	14	3	2																						EHD1 (+) Rab34 (+)	5.94059	8.82353	3.57143	6.11185	1.51857
4	20	7																														EHD1 (+) Rab34 (+)
5	15	2		1			2																									Confluent vs. 3 hour serum starvation	-1.539	-6.282 to 3.204	No	ns	0.7004
6	14	3	1	1	2																											Confluent vs. 6 hour serum starvation	-4.255	-8.997 to 0.4879	No	ns	0.0846
7	20	8																														3 hour serum starvation vs. 6 hour serum starvation	-2.716	-7.459 to 2.027	No	ns	0.3419
8	14	2
9
10
	131	32	4	3	2
	131	32	4	3	2	0	2
3 hours serum starvation
	cell counts	EHD1 (-) Rab34 (+) dot	EHD1 (+) Rab34 (-) dot	EHD1 (+) Rab34 (+) dot	EHD1 (-) Rab34 (+) ext	EHD1 (+) Rab34 (-) ext	EHD1 (+) Rab34 (+) ext
KAN681-1	19	3		1			1
2	15	3
3	12	7
4	15	3	1	1
5	12	2
6	16	3	1
7	18	3
8	13						1
9
10
	120	24	2	2	0	0	2
	cell counts	EHD1 (-) Rab34 (+) dot	EHD1 (+) Rab34 (-) dot	EHD1 (+) Rab34 (+) dot	EHD1 (-) Rab34 (+) ext	EHD1 (+) Rab34 (-) ext	EHD1 (+) Rab34 (+) ext
KAN681-2	13	1			2		1
2	12	4
3	11	1					1
4	15	2			2		1
5	10	3
6	12	3
7	15	1		3
8	12	3
9
10
	100	18	0	3	4
	100	18	0	3	4	0	3
																									EHD1 positive centriole
																									0 hour				average	SEM		Within each row, compare columns (simple effects within rows)
	cell counts	EHD1 (-) Rab34 (+) dot	EHD1 (+) Rab34 (-) dot	EHD1 (+) Rab34 (+) dot	EHD1 (-) Rab34 (+) ext	EHD1 (+) Rab34 (-) ext	EHD1 (+) Rab34 (+) ext																		EHD1 negative	99.2806	97.3684	93.1298	98.3245	0.956077
KAN681-3	11	2																							EHD1 positive	0.719424	2.63158	6.87023	1.6755	0.956077		Number of families	2
2	11	1			1																											Number of comparisons per family	3
3	18	3																														Alpha	0.05
4	21	3	1				1
5	13																								3 hour							Tukey's multiple comparisons test	Mean Diff.	95.00% CI of diff.	Below threshold?	Summary	Adjusted P Value
6	18	3
7	14	6																							EHD1 negative	95	94	98.2906	94.5	0.5		Row 1
8	11	2			2																				EHD1 positive	5	6	1.7094	5.5	0.5		Confluent vs. 3 hour serum starvation	0.8294	-5.082 to 6.740	No	ns	0.9261
9																																Confluent vs. 6 hour serum starvation	3.659	-2.252 to 9.570	No	ns	0.263
10																																3 hour serum starvation vs. 6 hour serum starvation	2.83	-3.081 to 8.741	No	ns	0.4337
	117	20	1	0	3
	117	20	1	0	3	0	1																									Row 2
																									6 hour							Confluent vs. 3 hour serum starvation	-0.8294	-6.740 to 5.082	No	ns	0.9261
																																Confluent vs. 6 hour serum starvation	-3.659	-9.570 to 2.252	No	ns	0.263
																									EHD1 negative	93.0693	90.1961	95.5357	91.6327	1.43661		3 hour serum starvation vs. 6 hour serum starvation	-2.83	-8.741 to 3.081	No	ns	0.4337
																									EHD1 positive	6.93069	9.80392	4.46429	8.36731	1.43661
6 hours serum starvation
	cell counts	EHD1 (-) Rab34 (+) dot	EHD1 (+) Rab34 (-) dot	EHD1 (+) Rab34 (+) dot	EHD1 (-) Rab34 (+) ext	EHD1 (+) Rab34 (-) ext	EHD1 (+) Rab34 (+) ext
KAN681-4	10	1			2
2	9	1					1
3	14			1			1
4	14	3		1
5	12		1
6	13	3					1
7	16	3					1
8	13	1
9
10
	101	12	1	2	2	0	4
	cell counts	EHD1 (-) Rab34 (+) dot	EHD1 (+) Rab34 (-) dot	EHD1 (+) Rab34 (+) dot	EHD1 (-) Rab34 (+) ext	EHD1 (+) Rab34 (-) ext	EHD1 (+) Rab34 (+) ext
KAN681-5	11						1
2	11	3
3	13	2
4	14	2			1
5	10	2					1
6	12	2		1	1		1
7	13	2					2
8	18		1	1			2
9
10
	102	13	1	2	2
	102	13	1	2	2	0	7
	cell counts	EHD1 (-) Rab34 (+) dot	EHD1 (+) Rab34 (-) dot	EHD1 (+) Rab34 (+) dot	EHD1 (-) Rab34 (+) ext	EHD1 (+) Rab34 (-) ext	EHD1 (+) Rab34 (+) ext
KAN681-6	19	5		1
2	16	1			1
3	12	2
4	9	2
5	14	2					1
6	13	3	1
7	12	2					1
8	17	4		1
9
10
	112	21	1	2	1
	112	21	1	2	1	0	2

## Sheet: IF condition
Exp. number	Cell line	Gene induced	Culture condition, fixation condition	rabbit-Alexa488	mouse IgG1-Alexa568	mouse IgG2b-Alexa647	Nuclear stain	Date	Replicate
Confluent
KAN670-1	RPE-hTERT		+ FBS for 24 hours, fixed in 4% PFA at RT for 15 minutes.	Rab34, Santa Cruz, sc-376710, 1:250	EHD1, Steve Caplan, 1:1000	CEP170, Invitrogen, 41-3200, 1:1000	DAPI	2021-05-21	No.1
KAN670-2	RPE-hTERT		+ FBS for 24 hours, fixed in 4% PFA at RT for 15 minutes.	Rab34, Santa Cruz, sc-376710, 1:250	EHD1, Steve Caplan, 1:1000	CEP170, Invitrogen, 41-3200, 1:1000	DAPI	2021-05-21	No.2
KAN670-3	RPE-hTERT		+ FBS for 24 hours, fixed in 4% PFA at RT for 15 minutes.	Rab34, Santa Cruz, sc-376710, 1:250	EHD1, Steve Caplan, 1:1000	CEP170, Invitrogen, 41-3200, 1:1000	DAPI	2021-05-21	No.3
serum starved for 3 hours
KAN681-1	RPE-hTERT		serum starved for 3 hours, fixed in 4% PFA at RT for 15 mintues	Rab34, Santa Cruz, sc-376710, 1:250	EHD1, Steve Caplan, 1:1000	CEP170, Invitrogen, 41-3200, 1:1000	DAPI
KAN681-2	RPE-hTERT		serum starved for 3 hours, fixed in 4% PFA at RT for 15 mintues	Rab34, Santa Cruz, sc-376710, 1:250	EHD1, Steve Caplan, 1:1000	CEP170, Invitrogen, 41-3200, 1:1000	DAPI
KAN681-3	RPE-hTERT		serum starved for 3 hours, fixed in 4% PFA at RT for 15 mintues	Rab34, Santa Cruz, sc-376710, 1:250	EHD1, Steve Caplan, 1:1000	CEP170, Invitrogen, 41-3200, 1:1000	DAPI
serum starved for 6 hours
KAN681-4	RPE-hTERT		serum starved for 6 hours, fixed in 4% PFA at RT for 15 mintues	Rab34, Santa Cruz, sc-376710, 1:250	EHD1, Steve Caplan, 1:1000	CEP170, Invitrogen, 41-3200, 1:1000	DAPI
KAN681-5	RPE-hTERT		serum starved for 6 hours, fixed in 4% PFA at RT for 15 mintues	Rab34, Santa Cruz, sc-376710, 1:250	EHD1, Steve Caplan, 1:1000	CEP170, Invitrogen, 41-3200, 1:1000	DAPI
KAN681-6	RPE-hTERT		serum starved for 6 hours, fixed in 4% PFA at RT for 15 mintues	Rab34, Santa Cruz, sc-376710, 1:250	EHD1, Steve Caplan, 1:1000	CEP170, Invitrogen, 41-3200, 1:1000	DAPI

## Sheet: Statistics
Within each row, compare columns (simple effects within rows)
Number of families	4
Number of comparisons per family	3
Alpha	0.05
Two-way ANOVA
Tukey's multiple comparisons test	Mean Diff.	95.00% CI of diff.	Below threshold?	Summary	Adjusted P Value
EHD1 (-) Rab34(-)
Confluent vs. 3 hour serum starvation	-8.932	-13.67 to -4.189	Yes	***	0.0003
Confluent vs. 6 hour serum starvation	-10.58	-15.33 to -5.842	Yes	****	<0.0001
3 hour serum starvation vs. 6 hour serum starvation	-1.653	-6.396 to 3.090	No	ns	0.6638
EHD1 (-) Rab34 (+)
Confluent vs. 3 hour serum starvation	9.761	5.019 to 14.50	Yes	****	<0.0001
Confluent vs. 6 hour serum starvation	14.24	9.501 to 18.99	Yes	****	<0.0001
3 hour serum starvation vs. 6 hour serum starvation	4.483	-0.2600 to 9.225	No	ns	0.0664
EHD1 (+) Rab34 (-)
Confluent vs. 3 hour serum starvation	0.7096	-4.033 to 5.452	No	ns	0.9262
Confluent vs. 6 hour serum starvation	0.5956	-4.147 to 5.338	No	ns	0.9474
3 hour serum starvation vs. 6 hour serum starvation	-0.114	-4.857 to 4.629	No	ns	0.998
EHD1 (+) Rab34 (+)
Confluent vs. 3 hour serum starvation	-1.539	-6.282 to 3.204	No	ns	0.7004
Confluent vs. 6 hour serum starvation	-4.255	-8.997 to 0.4879	No	ns	0.0846
3 hour serum starvation vs. 6 hour serum starvation	-2.716	-7.459 to 2.027	No	ns	0.3419
