# Supplementary material for: A hierarchical pathway for assembly of the distal appendages that organize primary cilia
Source: eLife. 2025 Jan 30;14:e85999. doi: 10.7554/eLife.85999 (PMC11984956; doi:10.7554/eLife.85999)
Supplement: Figure 3—source data 4. [file elife-85999-fig3-data4.xlsx]

## Sheet: Raw data
Confluent
	cell counts	PACSIN2 (-) Rab34 (+) dot	PACSIN2 (+) Rab34 (-) dot	PACSIN2 (+) Rab34 (+) dot	PACSIN2 (-) Rab34 (+) ext	PACSIN2 (+) Rab34 (-) ext	PACSIN2 (+) Rab34 (+) ext
KAN671-1	16	6		1					0 hour		PACSIN2 (-) Rab34(-)	PACSIN2 (-) Rab34 (+)	PACSIN2 (+) Rab34 (-)	PACSIN2 (+) Rab34 (+)		3 hour		PACSIN2 (-) Rab34(-)	PACSIN2 (-) Rab34 (+)	PACSIN2 (+) Rab34 (-)	PACSIN2 (+) Rab34 (+)			6 hour		PACSIN2 (-) Rab34(-)	PACSIN2 (-) Rab34 (+)	PACSIN2 (+) Rab34 (-)	PACSIN2 (+) Rab34 (+)
2	16	2	2	1						KAN671-1	65.9259	26.6667	2.22222	5.18519			KAN682-1	75.6757	14.4144	2.7027	7.20721				KAN682-4	71.1712	16.2162	6.30631	6.30631
3	17	6			1					KAN671-2	64.0351	30.7018	2.63158	2.63158			KAN682-2	75.6757	16.2162	1.8018	6.30631				KAN682-5	66.3934	15.5738	9.83607	8.19672
4	17	5								KAN671-3	77.2358	20.3252	1.62602	0.813008			KAN682-3	74.5614	14.9123	0.877193	9.64912				KAN682-6	66.9811	16.9811	9.43396	6.60377
5	18	4		1			1			average	69.0656	25.8979	2.15994	2.87659			average	75.3043	15.181	1.7939	7.72088				average	68.1819	16.257	8.52544	7.0356
6	13	3					2			SEM	4.12139	3.02002	0.291947	1.26807			SEM	0.371424	0.537205	0.526994	0.998582				SEM	1.50423	0.406783	1.11562	0.586877
7	18	5
8	20	4	1				1
9
10
	135	35	3	3	1	0	4
	cell counts	PACSIN2 (-) Rab34 (+) dot	PACSIN2 (+) Rab34 (-) dot	PACSIN2 (+) Rab34 (+) dot	PACSIN2 (-) Rab34 (+) ext	PACSIN2 (+) Rab34 (-) ext	PACSIN2 (+) Rab34 (+) ext																		0 hour
KAN671-2	19	5																								KAN671-1	KAN671-2	KAN671-3	average	SEM
2	16	1	1	1			1																		PACSIN2 (-) Rab34(-)	65.9259	64.0351	77.2358	69.0656	4.12139		Within each row, compare columns (simple effects within rows)
3	12	2																							PACSIN2 (-) Rab34 (+)	26.6667	30.7018	20.3252	25.8979	3.02002
4	16	4	1																						PACSIN2 (+) Rab34 (-)	2.22222	2.63158	1.62602	2.15994	0.291947		Number of families	4
5	11	2					1																		PACSIN2 (+) Rab34 (+)	5.18519	2.63158	0.813008	2.87659	1.26807		Number of comparisons per family	3
6	11	4	1																													Alpha	0.05
7	15	7																							3 hour
8	14	10																								KAN682-1	KAN682-2	KAN682-3	average	SEM		Tukey's multiple comparisons test	Mean Diff.	95.00% CI of diff.	Below threshold?	Summary	Adjusted P Value
9																									PACSIN2 (-) Rab34(-)	75.6757	75.6757	74.5614	75.3043	0.371424
10																									PACSIN2 (-) Rab34 (+)	14.4144	16.2162	14.9123	15.181	0.537205		PACSIN2 (-) Rab34(-)
	114	35	3	1	0																				PACSIN2 (+) Rab34 (-)	2.7027	1.8018	0.877193	1.7939	0.526994		Confluent vs. 3 hour serum starvation	-6.239	-12.14 to -0.3362	Yes	*	0.0369
	114	35	3	1	0	0	2																		PACSIN2 (+) Rab34 (+)	7.20721	6.30631	9.64912	7.72088	0.998582		Confluent vs. 6 hour serum starvation	0.8837	-5.019 to 6.786	No	ns	0.9261
																																3 hour serum starvation vs. 6 hour serum starvation	7.122	1.220 to 13.02	Yes	*	0.016
																									6 hour							PACSIN2 (-) Rab34 (+)
																										KAN682-4	KAN682-5	KAN682-6	average	SEM		Confluent vs. 3 hour serum starvation	10.72	4.814 to 16.62	Yes	***	0.0004
	cell counts	PACSIN2 (-) Rab34 (+) dot	PACSIN2 (+) Rab34 (-) dot	PACSIN2 (+) Rab34 (+) dot	PACSIN2 (-) Rab34 (+) ext	PACSIN2 (+) Rab34 (-) ext	PACSIN2 (+) Rab34 (+) ext																		PACSIN2 (-) Rab34(-)	71.1712	66.3934	66.9811	68.1819	1.50423		Confluent vs. 6 hour serum starvation	9.641	3.738 to 15.54	Yes	**	0.0012
KAN671-3	12	3	1																						PACSIN2 (-) Rab34 (+)	16.2162	15.5738	16.9811	16.257	0.406783		3 hour serum starvation vs. 6 hour serum starvation	-1.076	-6.979 to 4.826	No	ns	0.8925
2	11	3																							PACSIN2 (+) Rab34 (-)	6.30631	9.83607	9.43396	8.52544	1.11562
3	19	3			1		1																		PACSIN2 (+) Rab34 (+)	6.30631	8.19672	6.60377	7.0356	0.586877		PACSIN2 (+) Rab34 (-)
4	17	6																														Confluent vs. 3 hour serum starvation	0.366	-5.536 to 6.269	No	ns	0.9869
5	17	3	1																													Confluent vs. 6 hour serum starvation	-6.366	-12.27 to -0.4630	Yes	*	0.0328
6	17	1																														3 hour serum starvation vs. 6 hour serum starvation	-6.732	-12.63 to -0.8291	Yes	*	0.0233
7	17	3
8	13	2																														PACSIN2 (+) Rab34 (+)
9																																Confluent vs. 3 hour serum starvation	-4.844	-10.75 to 1.058	No	ns	0.1221
10																																Confluent vs. 6 hour serum starvation	-4.159	-10.06 to 1.743	No	ns	0.2045
	123	24	2	0	1																											3 hour serum starvation vs. 6 hour serum starvation	0.6853	-5.217 to 6.588	No	ns	0.9548
	123	24	2	0	1	0	1
																																Test details	Mean 1	Mean 2	Mean Diff.	SE of diff.	N1	N2	q	DF
																																PACSIN2 (-) Rab34(-)
																																Confluent vs. 3 hour serum starvation	69.07	75.3	-6.239	2.364	3	3	3.733	24
																																Confluent vs. 6 hour serum starvation	69.07	68.18	0.8837	2.364	3	3	0.5287	24
																																3 hour serum starvation vs. 6 hour serum starvation	75.3	68.18	7.122	2.364	3	3	4.262	24
																																PACSIN2 (-) Rab34 (+)
3 hours serum starvation																																Confluent vs. 3 hour serum starvation	25.9	15.18	10.72	2.364	3	3	6.412	24
																																Confluent vs. 6 hour serum starvation	25.9	16.26	9.641	2.364	3	3	5.769	24
	cell counts	PACSIN2 (-) Rab34 (+) dot	PACSIN2 (+) Rab34 (-) dot	PACSIN2 (+) Rab34 (+) dot	PACSIN2 (-) Rab34 (+) ext	PACSIN2 (+) Rab34 (-) ext	PACSIN2 (+) Rab34 (+) ext																									3 hour serum starvation vs. 6 hour serum starvation	15.18	16.26	-1.076	2.364	3	3	0.6439	24
KAN682-1	10	2		1			1
2	13	1																														PACSIN2 (+) Rab34 (-)
3	15	3					2																									Confluent vs. 3 hour serum starvation	2.16	1.794	0.366	2.364	3	3	0.219	24
4	13	2	1		2		1																									Confluent vs. 6 hour serum starvation	2.16	8.525	-6.366	2.364	3	3	3.809	24
5	12	2		1																												3 hour serum starvation vs. 6 hour serum starvation	1.794	8.525	-6.732	2.364	3	3	4.028	24
6	15		1			1	1
7	10	1		1																												PACSIN2 (+) Rab34 (+)
8	11	1			1																											Confluent vs. 3 hour serum starvation	2.877	7.721	-4.844	2.364	3	3	2.899	24
9	12				1																											Confluent vs. 6 hour serum starvation	2.877	7.036	-4.159	2.364	3	3	2.489	24
10																																3 hour serum starvation vs. 6 hour serum starvation	7.721	7.036	0.6853	2.364	3	3	0.41	24
	111	12	2	3	4	1	5
	cell counts	PACSIN2 (-) Rab34 (+) dot	PACSIN2 (+) Rab34 (-) dot	PACSIN2 (+) Rab34 (+) dot	PACSIN2 (-) Rab34 (+) ext	PACSIN2 (+) Rab34 (-) ext	PACSIN2 (+) Rab34 (+) ext
KAN682-2	17	3		1
2	16	2	1	1
3	13	1					2
4	13	3				1
5	9	2
6	17	4		1
7	15	1		1			1
8	11	2
9
10
	111	18	1	4	0	1	3
																									0 hour				average	SEM
	cell counts	PACSIN2 (-) Rab34 (+) dot	PACSIN2 (+) Rab34 (-) dot	PACSIN2 (+) Rab34 (+) dot	PACSIN2 (-) Rab34 (+) ext	PACSIN2 (+) Rab34 (-) ext	PACSIN2 (+) Rab34 (+) ext																		PACSIN2 negative	92.5926	94.7368	97.561	93.6647	1.07212		Within each row, compare columns (simple effects within rows)
KAN682-3	10	1		1			1																		PACSIN2 positive	7.40741	5.26316	2.43902	6.33528	1.07212
2	9	1					2																									Number of families	2
3	12	2		1																												Number of comparisons per family	3
4	14	5		2			1																									Alpha	0.05
5	13	1		1																					3 hour
6	12	1		1		1																										Tukey's multiple comparisons test	Mean Diff.	95.00% CI of diff.	Below threshold?	Summary	Adjusted P Value
7	15	1					1																		PACSIN2 negative	90.0901	91.8919	89.4737	90.991	0.900901
8	13	2																							PACSIN2 positive	9.90991	8.10811	10.5263	9.00901	0.900901		PACSIN2 negative
9	16	3																														Confluent vs. 3 hour serum starvation	4.478	-0.4417 to 9.398	No	ns	0.0758
10																																Confluent vs. 6 hour serum starvation	10.52	5.605 to 15.44	Yes	***	0.0003
	114	17	0	6	0																											3 hour serum starvation vs. 6 hour serum starvation	6.046	1.126 to 10.97	Yes	*	0.0168
	114	17	0	6	0	1	5
																									6 hour							PACSIN2 positive
																																Confluent vs. 3 hour serum starvation	-4.478	-9.398 to 0.4417	No	ns	0.0758
																									PACSIN2 negative	87.3874	81.9672	83.9623	84.6773	2.71009		Confluent vs. 6 hour serum starvation	-10.52	-15.44 to -5.605	Yes	***	0.0003
																									PACSIN2 positive	12.6126	18.0328	16.0377	15.3227	2.71009		3 hour serum starvation vs. 6 hour serum starvation	-6.046	-10.97 to -1.126	Yes	*	0.0168
6 hours serum starvation
																																Test details	Mean 1	Mean 2	Mean Diff.	SE of diff.	N1	N2	q	DF
	cell counts	PACSIN2 (-) Rab34 (+) dot	PACSIN2 (+) Rab34 (-) dot	PACSIN2 (+) Rab34 (+) dot	PACSIN2 (-) Rab34 (+) ext	PACSIN2 (+) Rab34 (-) ext	PACSIN2 (+) Rab34 (+) ext																									PACSIN2 negative
KAN682-4	16	5					1																									Confluent vs. 3 hour serum starvation	94.96	90.49	4.478	1.844	3	3	3.434	12
2	17	2	2																													Confluent vs. 6 hour serum starvation	94.96	84.44	10.52	1.844	3	3	8.071	12
3	15	2				1	2																									3 hour serum starvation vs. 6 hour serum starvation	90.49	84.44	6.046	1.844	3	3	4.637	12
4	19	1					3
5	14	2	2																													PACSIN2 positive
6	9	2			1	1																										Confluent vs. 3 hour serum starvation	5.037	9.515	-4.478	1.844	3	3	3.434	12
7	8	2																														Confluent vs. 6 hour serum starvation	5.037	15.56	-10.52	1.844	3	3	8.071	12
8	13	1	1				1																									3 hour serum starvation vs. 6 hour serum starvation	9.515	15.56	-6.046	1.844	3	3	4.637	12
9
10
	111	17	5	0	1	2	7
	cell counts	PACSIN2 (-) Rab34 (+) dot	PACSIN2 (+) Rab34 (-) dot	PACSIN2 (+) Rab34 (+) dot	PACSIN2 (-) Rab34 (+) ext	PACSIN2 (+) Rab34 (-) ext	PACSIN2 (+) Rab34 (+) ext
KAN682-5	19	2			1	2	1
2	17	6				3
3	14	3					1
4	13	2			2	1
5	16	1		1		1	1
6	13				1	3
7	11			1		2
8	19	1					5
9
10
	122	15	0	2	4
	122	15	0	2	4	12	8
	cell counts	PACSIN2 (-) Rab34 (+) dot	PACSIN2 (+) Rab34 (-) dot	PACSIN2 (+) Rab34 (+) dot	PACSIN2 (-) Rab34 (+) ext	PACSIN2 (+) Rab34 (-) ext	PACSIN2 (+) Rab34 (+) ext
KAN682-6	14	3		1			1
2	19	3	1			1
3	14	3		1		2	1
4	9	2	1
5	13	2				2
6	12	1					1
7	11	2		1		1
8	14	2				2	1
9
10
	106	18	2	3	0
	106	18	2	3	0	8	4

## Sheet: IF condition
Exp. number	Cell line	Gene induced	Culture condition, fixation condition	rabbit-Alexa488	mouse IgG1-Alexa568	mouse IgG2b-Alexa647	Nuclear stain	Date	Replicate
Confluent
KAN671-1	RPE-hTERT		+ FBS for 24 hours, fixed in '[List of the antiboidies.xlsx]Sheet1'!$E$24% PFA at RT for 15 minutes.	Rab34, Santa Cruz, sc-376710, 1:250	PACSIN2, abcam, ab37615, 1:1000	CEP170, Invitrogen, 41-3200, 1:1000	DAPI	2021-05-21	No.1
KAN671-2	RPE-hTERT		+ FBS for 24 hours, fixed in 4% PFA at RT for 15 minutes.	Rab34, Santa Cruz, sc-376710, 1:250	PACSIN2, abcam, ab37615, 1:1000	CEP170, Invitrogen, 41-3200, 1:1000	DAPI	2021-05-21	No.2
KAN671-3	RPE-BFP-Cas9 pMCB306 (pool)		confluent, Fixed in 4% PFA at RT for 15 minutes.	Rab34, Santa Cruz, sc-376710, 1:250	PACSIN2, abcam, ab37615, 1:1000	CEP170, Invitrogen, 41-3200, 1:1000	DAPI	2021-05-21	No.5
serum starved for 3 hours
KAN682-1	RPE-hTERT		serum starved for 3 hours, fixed in 4% PFA at RT for 15 mintues	Rab34, Santa Cruz, sc-376710, 1:250	PACSIN2, abcam, ab37615, 1:1000	CEP170, Invitrogen, 41-3200, 1:1000	DAPI
KAN682-2	RPE-hTERT		serum starved for 3 hours, fixed in 4% PFA at RT for 15 mintues	Rab34, Santa Cruz, sc-376710, 1:250	PACSIN2, abcam, ab37615, 1:1000	CEP170, Invitrogen, 41-3200, 1:1000	DAPI
KAN682-3	RPE-hTERT		serum starved for 3 hours, fixed in 4% PFA at RT for 15 mintues	Rab34, Santa Cruz, sc-376710, 1:250	PACSIN2, abcam, ab37615, 1:1000	CEP170, Invitrogen, 41-3200, 1:1000	DAPI
serum starved for 6 hours
KAN682-4	RPE-hTERT		serum starved for 6 hours, fixed in 4% PFA at RT for 15 mintues	Rab34, Santa Cruz, sc-376710, 1:250	PACSIN2, abcam, ab37615, 1:1000	CEP170, Invitrogen, 41-3200, 1:1000	DAPI
KAN682-5	RPE-hTERT		serum starved for 6 hours, fixed in 4% PFA at RT for 15 mintues	Rab34, Santa Cruz, sc-376710, 1:250	PACSIN2, abcam, ab37615, 1:1000	CEP170, Invitrogen, 41-3200, 1:1000	DAPI
KAN682-6	RPE-hTERT		serum starved for 6 hours, fixed in 4% PFA at RT for 15 mintues	Rab34, Santa Cruz, sc-376710, 1:250	PACSIN2, abcam, ab37615, 1:1000	CEP170, Invitrogen, 41-3200, 1:1000	DAPI

## Sheet: Statistics
Within each row, compare columns (simple effects within rows)
Number of families	4
Number of comparisons per family	3
Alpha	0.05
Two-way ANOVA
Tukey's multiple comparisons test	Mean Diff.	95.00% CI of diff.	Below threshold?	Summary	Adjusted P Value
PACSIN2 (-) Rab34(-)
Confluent vs. 3 hour serum starvation	-6.239	-12.14 to -0.3362	Yes	*	0.0369
Confluent vs. 6 hour serum starvation	0.8837	-5.019 to 6.786	No	ns	0.9261
3 hour serum starvation vs. 6 hour serum starvation	7.122	1.220 to 13.02	Yes	*	0.016
PACSIN2 (-) Rab34 (+)
Confluent vs. 3 hour serum starvation	10.72	4.814 to 16.62	Yes	***	0.0004
Confluent vs. 6 hour serum starvation	9.641	3.738 to 15.54	Yes	**	0.0012
3 hour serum starvation vs. 6 hour serum starvation	-1.076	-6.979 to 4.826	No	ns	0.8925
PACSIN2 (+) Rab34 (-)
Confluent vs. 3 hour serum starvation	0.366	-5.536 to 6.269	No	ns	0.9869
Confluent vs. 6 hour serum starvation	-6.366	-12.27 to -0.4630	Yes	*	0.0328
3 hour serum starvation vs. 6 hour serum starvation	-6.732	-12.63 to -0.8291	Yes	*	0.0233
PACSIN2 (+) Rab34 (+)
Confluent vs. 3 hour serum starvation	-4.844	-10.75 to 1.058	No	ns	0.1221
Confluent vs. 6 hour serum starvation	-4.159	-10.06 to 1.743	No	ns	0.2045
3 hour serum starvation vs. 6 hour serum starvation	0.6853	-5.217 to 6.588	No	ns	0.9548
Test details	Mean 1	Mean 2	Mean Diff.	SE of diff.	N1	N2	q	DF
PACSIN2 (-) Rab34(-)
Confluent vs. 3 hour serum starvation	69.07	75.3	-6.239	2.364	3	3	3.733	24
Confluent vs. 6 hour serum starvation	69.07	68.18	0.8837	2.364	3	3	0.5287	24
3 hour serum starvation vs. 6 hour serum starvation	75.3	68.18	7.122	2.364	3	3	4.262	24
PACSIN2 (-) Rab34 (+)
Confluent vs. 3 hour serum starvation	25.9	15.18	10.72	2.364	3	3	6.412	24
Confluent vs. 6 hour serum starvation	25.9	16.26	9.641	2.364	3	3	5.769	24
3 hour serum starvation vs. 6 hour serum starvation	15.18	16.26	-1.076	2.364	3	3	0.6439	24
PACSIN2 (+) Rab34 (-)
Confluent vs. 3 hour serum starvation	2.16	1.794	0.366	2.364	3	3	0.219	24
Confluent vs. 6 hour serum starvation	2.16	8.525	-6.366	2.364	3	3	3.809	24
3 hour serum starvation vs. 6 hour serum starvation	1.794	8.525	-6.732	2.364	3	3	4.028	24
PACSIN2 (+) Rab34 (+)
Confluent vs. 3 hour serum starvation	2.877	7.721	-4.844	2.364	3	3	2.899	24
Confluent vs. 6 hour serum starvation	2.877	7.036	-4.159	2.364	3	3	2.489	24
3 hour serum starvation vs. 6 hour serum starvation	7.721	7.036	0.6853	2.364	3	3	0.41	24
