# Supplementary material for: A hierarchical pathway for assembly of the distal appendages that organize primary cilia
Source: eLife. 2025 Jan 30;14:e85999. doi: 10.7554/eLife.85999 (PMC11984956; doi:10.7554/eLife.85999)
Supplement: Figure 4—source data 1. [file elife-85999-fig4-data1.xlsx]

## Sheet: Raw data
sgGFP (pMCB306)				RAB34 KO				MYO5A KO
	Ciliated	cell counts	ARL13B+ Ac-Tub- dot		Ciliated	cell counts	ARL13B+ Ac-Tub- dot		Ciliated	cell counts	ARL13B+ Ac-Tub- dot																Table Analyzed	KAN500			Table Analyzed	KAN500
KAN500-19	15	23		KAN500-20	5	36		KAN500-21	27	34
2	26	35		2	1	35		2	26	30																	Column B	RAB34KO			Column C	MYO5AKO
3	21	28		3	1	31		3	25	34																	vs.	vs.			vs.	vs.
4	17	26		4	1	33		4	18	29													pMCB306	Rab34KO	Myo5A KO		Column A	sgGFP			Column A	sgGFP
5	24	29		5	2	33		5	31	39												KAN500_19-21	72.1893	5.58376	79.4872
6	19	28		6	1	29		6	28	29												KAN500_22-24	65.641	7.05882	71.2195		Unpaired t test with Welch's correction				Unpaired t test with Welch's correction
7				7				7														KAN429_1-3	78.5714	10.3586	81.3853		P value	0.0012			P value	0.3447
8				8				8														Average	72.1339	7.66705	77.364		P value summary	**			P value summary	ns
9				9				9														SEM	3.73279	1.41152	3.12072		Significantly different (P < 0.05)?	Yes			Significantly different (P < 0.05)?	No
10				10				10																			One- or two-tailed P value?	Two-tailed			One- or two-tailed P value?	Two-tailed
	122	169	0		11	197	0		155	195	0																Welch-corrected t, df	t=16.15, df=2.561			Welch-corrected t, df	t=1.075, df=3.878
		72.1893				5.58376				79.4872
																											How big is the difference?				How big is the difference?
																											Mean of column A	72.13			Mean of column A	72.13
	Ciliated	cell counts	ARL13B+ Ac-Tub- dot		Ciliated	cell counts	ARL13B+ Ac-Tub- dot		Ciliated	cell counts	ARL13B+ Ac-Tub- dot																Mean of column B	7.667			Mean of column C	77.36
KAN500-22	16	30		KAN500-23	2	33		KAN500-24	32	39																	Difference between means (B - A) ± SEM	-64.47 ± 3.991			Difference between means (C - A) ± SEM	5.230 ± 4.865
2	23	29		2	2	36		2	24	35																	95% confidence interval	-78.49 to -50.44			95% confidence interval	-8.448 to 18.91
3	23	35		3	0	33		3	22	27																	R squared (eta squared)	0.9903			R squared (eta squared)	0.2296
4	23	33		4	1	35		4	27	36
5	23	36		5	2	0		5	15	30																	F test to compare variances				F test to compare variances
6	20	32		6	5	33		6	26	38																	F, DFn, Dfd	6.993, 2, 2			F, DFn, Dfd	1.431, 2, 2
7				7				7																			P value	0.2502			P value	0.8228
8				8				8																			P value summary	ns			P value summary	ns
9				9				9																			Significantly different (P < 0.05)?	No			Significantly different (P < 0.05)?	No
10				10				10
	128	195	0		12	170	0		146	205	0																Data analyzed				Data analyzed
		65.641				7.05882				71.2195																	Sample size, column A	3			Sample size, column A	3
																											Sample size, column B	3			Sample size, column C	3
	Ciliated	cell counts	ARL13B+ Ac-Tub- dot		Ciliated	cell counts	ARL13B+ Ac-Tub- dot		Ciliated	cell counts	ARL13B+ Ac-Tub- dot
KAN429-1	21	33	2	KAN429-2	3	39	1	KAN429-3	25	32
2	29	35	1	2	6	47		2	30	39
3	34	40		3	6	45	1	3	31	35	1
4	33	40		4	2	39	1	4	39	47
5	27	36	1	5	1	34		5	39	42
6	32	40		6	8	47	1	6	24	36	1
7				7				7
8				8				8
9				9				9
10				10				10
	176	224	4		26	251	4		188	231	2
		78.5714				10.3586				81.3853

## Sheet: IF condition
Exp. number	Cell line	Gene induced	Culture condition, fixation condition	rabbit-Alexa488	mouse IgG1-Alexa568	mouse IgG2b-Alexa647	Nuclear stain	Date	Replicate
Exp.1
KAN500-19	RPE-BFP-Cas9 pMCB306 (pool)		Serum starved for 24 hours. Fixed in 4% PFA at RT for 15 minutes.	ARL13B, Proteintech, 17711-1-AP, 1:1000	CEP170, Invitrogen, 41-3200, 1:1000	Ac-Tub, 6B-11, SIGMA, 1:2000	DAPI	2019-05-29	No.2	cilia count
KAN500-20	RPE-BFP-Cas9 Rab34KO (pool)		Serum starved for 24 hours. Fixed in 4% PFA at RT for 15 minutes.	ARL13B, Proteintech, 17711-1-AP, 1:1000	CEP170, Invitrogen, 41-3200, 1:1000	Ac-Tub, 6B-11, SIGMA, 1:2000	DAPI	2019-05-29	No.2	cilia count
KAN500-21	RPE-BFP-Cas9 Myo5AKO (pool)		Serum starved for 24 hours. Fixed in 4% PFA at RT for 15 minutes.	ARL13B, Proteintech, 17711-1-AP, 1:1000	CEP170, Invitrogen, 41-3200, 1:1000	Ac-Tub, 6B-11, SIGMA, 1:2000	DAPI	2019-05-29	No.2	cilia count
Exp.2
KAN500-22	RPE-BFP-Cas9 pMCB306 (pool)		Serum starved for 24 hours. Fixed in 4% PFA at RT for 15 minutes.	ARL13B, Proteintech, 17711-1-AP, 1:1000	CEP170, Invitrogen, 41-3200, 1:1000	Ac-Tub, 6B-11, SIGMA, 1:2000	DAPI	2019-05-29	No.4	cilia count
KAN500-23	RPE-BFP-Cas9 Rab34KO (pool)		Serum starved for 24 hours. Fixed in 4% PFA at RT for 15 minutes.	ARL13B, Proteintech, 17711-1-AP, 1:1000	CEP170, Invitrogen, 41-3200, 1:1000	Ac-Tub, 6B-11, SIGMA, 1:2000	DAPI	2019-05-29	No.4	cilia count
KAN500-24	RPE-BFP-Cas9 Myo5AKO (pool)		Serum starved for 24 hours. Fixed in 4% PFA at RT for 15 minutes.	ARL13B, Proteintech, 17711-1-AP, 1:1000	CEP170, Invitrogen, 41-3200, 1:1000	Ac-Tub, 6B-11, SIGMA, 1:2000	DAPI	2019-05-29	No.4	cilia count
Exp.3
KAN429-1	RPE-BFP-Cas9 pMCB306 (pool)		Fixed in 4% PFA, 24 hour serum starvation	ARL13B, Proteintech, 17711-1-AP, 1:1000	CEP170, Invitrogen, 41-3200, 1:1000	Ac-Tub, 6B-11, SIGMA, 1:2000	DAPI	2019-01-03
KAN429-2	RPE-BFP-Cas9 Rab34KO (pool)		Fixed in 4% PFA, 24 hour serum starvation	ARL13B, Proteintech, 17711-1-AP, 1:1000	CEP170, Invitrogen, 41-3200, 1:1000	Ac-Tub, 6B-11, SIGMA, 1:2000	DAPI	2019-01-03
KAN429-3	RPE-BFP-Cas9 Myo5AKO (pool)		Fixed in 4% PFA, 24 hour serum starvation	ARL13B, Proteintech, 17711-1-AP, 1:1000	CEP170, Invitrogen, 41-3200, 1:1000	Ac-Tub, 6B-11, SIGMA, 1:2000	DAPI	2019-01-03

## Sheet: Statistics
	Table Analyzed	KAN500			Table Analyzed	KAN500
	Column B	RAB34KO			Column C	MYO5AKO
	vs.	vs.			vs.	vs.
	Column A	sgGFP			Column A	sgGFP
	Unpaired t test with Welch's correction				Unpaired t test with Welch's correction
	P value	0.0012			P value	0.3447
	P value summary	**			P value summary	ns
	Significantly different (P < 0.05)?	Yes			Significantly different (P < 0.05)?	No
	One- or two-tailed P value?	Two-tailed			One- or two-tailed P value?	Two-tailed
	Welch-corrected t, df	t=16.15, df=2.561			Welch-corrected t, df	t=1.075, df=3.878
	How big is the difference?				How big is the difference?
	Mean of column A	72.13			Mean of column A	72.13
	Mean of column B	7.667			Mean of column C	77.36
	Difference between means (B - A) ± SEM	-64.47 ± 3.991			Difference between means (C - A) ± SEM	5.230 ± 4.865
	95% confidence interval	-78.49 to -50.44			95% confidence interval	-8.448 to 18.91
	R squared (eta squared)	0.9903			R squared (eta squared)	0.2296
	F test to compare variances				F test to compare variances
	F, DFn, Dfd	6.993, 2, 2			F, DFn, Dfd	1.431, 2, 2
	P value	0.2502			P value	0.8228
	P value summary	ns			P value summary	ns
	Significantly different (P < 0.05)?	No			Significantly different (P < 0.05)?	No
	Data analyzed				Data analyzed
	Sample size, column A	3			Sample size, column A	3
	Sample size, column B	3			Sample size, column C	3

## Sheet: Statistics 2 (ANOVA)
Table Analyzed	KAN500						Number of families	1
Data sets analyzed	A-C						Number of comparisons per family	2
							Alpha	0.05
ANOVA summary
F	176.1						Dunnett's multiple comparisons test	Mean Diff.	95.00% CI of diff.	Below threshold?	Summary	Adjusted P Value	A-?
P value	<0.0001						sgGFP vs. RAB34KO	64.47	52.62 to 76.31	Yes	****	<0.0001	B	RAB34KO
P value summary	****						sgGFP vs. MYO5AKO	-5.23	-17.07 to 6.613	No	ns	0.3987	C	MYO5AKO
Significant diff. among means (P < 0.05)?	Yes
R squared	0.9833						Test details	Mean 1	Mean 2	Mean Diff.	SE of diff.	n1	n2	q	DF
							sgGFP vs. RAB34KO	72.13	7.667	64.47	4.136	3	3	15.59	6
Brown-Forsythe test							sgGFP vs. MYO5AKO	72.13	77.36	-5.23	4.136	3	3	1.264	6
F (DFn, DFd)	0.4856 (2, 6)
P value	0.6376
P value summary	ns
Are SDs significantly different (P < 0.05)?	No
Bartlett's test
Bartlett's statistic (corrected)
P value
P value summary
Are SDs significantly different (P < 0.05)?
ANOVA table	SS	DF	MS	F (DFn, DFd)	P value
Treatment (between columns)	9041	2	4520	F (2, 6) = 176.1	P<0.0001
Residual (within columns)	154	6	25.66
Total	9195	8
Data summary
Number of treatments (columns)	3
Number of values (total)	9
