# Supplementary material for: A hierarchical pathway for assembly of the distal appendages that organize primary cilia
Source: eLife. 2025 Jan 30;14:e85999. doi: 10.7554/eLife.85999 (PMC11984956; doi:10.7554/eLife.85999)
Supplement: Figure 4—source data 2. [file elife-85999-fig4-data2.xlsx]

## Sheet: Raw data
sgGFP (pMCB306)	no vesicle	unfused vesicle	fused vesicle	Cilia		NCS1KO	no vesicle	unfused vesicle	fused vesicle	Cilia			Rab34KO	no vesicle	unfused vesicle	fused vesicle	Cilia
Slide#1 cell1	1					Slide#1 cell1	1						Slide#1 cell1	1
Slide#1 cell2			1			Slide#1 cell2	1						Slide#1 cell2	1
Slide#2 cell3	1					Slide#1 cell3	1						Slide#1 cell5	1
Slide#2 cell4			1			Slide#1 cell4			1				Slide#1 cell6	1
Slide#2 cell7			1			Slide#1 cell5	1						Slide#1 cell7	1
Slide#2 cell8		1				Slide#1 cell6	1						Slide#1 cell8	1
Slide#2 cell9	1					Slide#1 cell7	1						Slide#1 cell9	1
Slide#2 cell10	1					Slide#1 cell8	1						Slide#3 cell1	1
Slide#3 Cell1	1												Slide#3 cell4			1
Slide#3 Cell2			1			Slide#1 cell10							Slide#3 cell5	1
Slide#3 Cell3	1					Slide#2 cell1	1						Slide#3 cell6	1
Slide#3 Cell4	1					Slide#2 cell2	1						Slide#2 cell1	1
Slide#3 Cell5	1					Slide#2 cell3	1						Slide#3 cell7	1
Slide#3 Cell6	1					Slide#2 cell4			1				Slide#3 cell8	1
Slide#4 cell1	1					Slide#2 cell5	1						Slide#3 cell9	1
Slide#4 cell2		1				Slide#2 cell6	1						Slide#3 cell10	1
Slide#4 cell3			1			Slide#2 cell7	1						Slide#3 cell11	1
Slide#4 cell4	1					Slide#2 cell8	1						Slide#3 cell12	1
Slide#4 cell5				1		Slide#2 cell9	1
Slide#4 cell6	1					Slide#2 cell10	1
Slide#4 cell7			1			Slide#2 cell11	1
Slide#4 cell8			1			Slide#2 cell12	1
Slide#5 cell1	1					Slide#2 cell13	1
Slide#5 cell2	1					Slide#2 cell14			1
Slide#5 cell3	1					Slide#2 cell15	1
Slide#6 cell1	1					Slide#2 cell16	1
Slide#6 cell2	1					Slide#3 cell1	1
Silde#6 cell5	1					Slide#3 cell2	1
Silde#6 cell8	1					Slide#4 cell1	1
Silde#6 cell9		1				Slide#4 cell2	1
Silde#6 cell10		1				Slide#4 cell3	1
Silde#6 cell11	1
Silde#7 cell1			1
Silde#7 cell2				1
Silde#7 cell3				1
Silde#7 cell4		1
Silde#7 cell5		1
Silde#7 cell6			1
Silde#7 cell7	1
Silde#7 cell8	1
Silde#7 cell9			1
	22	6	10	3			26	0	3	0				17	0	1	0
	No vesicle	Unfused vesicle	Fused vesicle	Cilium	Total
sgGFP (pMCB306)	22	6	10	3	41
NCS1 KO	26	0	3	0	29
Rab34	17	0	1	0	18

## Sheet: Table for Fig.4B and
	No	Veicle		Cilium	Total
	vesicle	Unfused	Fused
sgGFP	22	6	10	3	41
Rab34	17	0	1	0	18

## Sheet: Statistics (4 columns)
	Total analysis
		No vesicle	Unfused vesicle	Fused vesicle	Cilium	Total		Table Analyzed	sgGFP v.s. RAB34 KO			Table Analyzed	sgGFP v.s. NCS1 KO
	sgGFP (pMCB306)	22	6	10	3	41
	NCS1 KO	26	0	3	0	29		P value and statistical significance				P value and statistical significance
	Rab34	17	0	1	0	18		Test	Chi-square			Test	Chi-square
								Chi-square, df	9.479, 3			Chi-square, df	11.38, 3
								P value	0.0236			P value	0.0098
								P value summary	*			P value summary	**
								One- or two-sided	NA			One- or two-sided	NA
								Statistically significant (P < 0.05)?	Yes			Statistically significant (P < 0.05)?	Yes
								Data analyzed				Data analyzed
								Number of rows	2			Number of rows	2
								Number of columns	4			Number of columns	4

## Sheet: Statistics (two columns)
	Two columns (no vesicle v.s. with vesicle)						Table Analyzed	sgGFP v.s. RAB34 KO (two columns)				Table Analyzed	sgGFP v.s. NCS1 KO (two columns)
		No vesicle at mother centriole	With vesicle at mother centriole	Total
	sgGFP (pMCB306)	22	16	38			P value and statistical significance					P value and statistical significance
	NCS1 KO	26	3	29			Test	Fisher's exact test				Test	Fisher's exact test
	RAB34 KO	17	1	18			P value	0.0054				P value	0.0058
							P value summary	**				P value summary	**
							One- or two-sided	Two-sided				One- or two-sided	Two-sided
							Statistically significant (P < 0.05)?	Yes				Statistically significant (P < 0.05)?	Yes
							Data analyzed	No vesicle	Centrosome with vesicle	Total		Data analyzed	No vesicle	Centrosome with vesicle	Total
							sgGFP (pMCB306)	22	16	38		sgGFP (pMCB306)	22	16	38
							RAB34 KO	17	1	18		NCS1 KO	26	3	29
							Total	39	17	56		Total	48	19	67
							Percentage of row total	No vesicle	Centrosome with vesicle			Percentage of row total	No vesicle	Centrosome with vesicle
							sgGFP (pMCB306)	57.89%	42.11%			sgGFP (pMCB306)	57.89%	42.11%
							RAB34 KO	94.44%	5.56%			NCS1 KO	89.66%	10.34%
							Percentage of column total	No vesicle	Centrosome with vesicle			Percentage of column total	No vesicle	Centrosome with vesicle
							sgGFP (pMCB306)	56.41%	94.12%			sgGFP (pMCB306)	45.83%	84.21%
							RAB34 KO	43.59%	5.88%			NCS1 KO	54.17%	15.79%
							Percentage of grand total	No vesicle	Centrosome with vesicle			Percentage of grand total	No vesicle	Centrosome with vesicle
							sgGFP (pMCB306)	39.29%	28.57%			sgGFP (pMCB306)	32.84%	23.88%
							RAB34 KO	30.36%	1.79%			NCS1 KO	38.81%	4.48%
