# Supplementary material for: A hierarchical pathway for assembly of the distal appendages that organize primary cilia
Source: eLife. 2025 Jan 30;14:e85999. doi: 10.7554/eLife.85999 (PMC11984956; doi:10.7554/eLife.85999)
Supplement: Figure 4—source data 3. [file elife-85999-fig4-data3.xlsx]

## Sheet: Raw Data
pMCB306				CEP89 KO				NCS1 KO				C3ORF14 KO				RAB34 KO				MYO5A KO
	CP110 2 dots	CP110 1 dot	cell number		CP110 2 dots	CP110 1 dot	cell number		CP110 2 dots	CP110 1 dot	cell number		CP110 2 dots	CP110 1 dot	cell number		CP110 2 dots	CP110 1 dot	cell number		CP110 2 dots	CP110 1 dot	cell number
KAN489-1	1	5	6	KAN489-2	2	4	6	KAN489-3	4	4	8	KAN489-4		6	6	KAN489-5	6	5	11	KAN489-6	1	12	13
2	1	10	11	2	3	4	7	2	4	5	9	2		7	7	2	4	6	10	2	1	7	8					CP110 2 dots	CP110 1 dot
3		8	8	3	2	8	10	3	2	4	6	3	2	9	11	3	3	5	8	3	1	7	8			KAN489-1	pMCB306	3.77358	96.2264
4		9	9	4	3	5	8	4	5	5	10	4		9	9	4	8	4	12	4	0	9	9			KAN489-7	pMCB306	7.14286	92.8571
5		10	10	5	1	7	8	5	5	4	9	5	2	10	12	5	3	6	9	5	0	8	8			KAN489-13	pMCB306	11.1111	88.8889
6		9	9	6	2	7	9	6	3	6	9	6	1	2	3	6	8	4	12	6	0	11	11			Average		7.34252	92.6575
7			0	7				7				7				7				7						s.d.		3.67284	3.67284
8			0	8				8				8				8				8
9			0	9				9				9				9				9
10			0	10				10				10				10				10								CP110 2 dots	CP110 1 dot
	2	51	53		13	35	48		23	28	51		5	43	48		32	30	62		3	54	57			KAN489-2	CEP89KO	27.0833	72.9167
	3.77358	96.2264			27.0833	72.9167			45.098	54.902			10.4167	89.5833			51.6129	48.3871			5.26316	94.7368				KAN489-8	CEP89KO	48.2759	51.7241
																										KAN489-14	CEP89KO	29.4118	70.5882
																										Average		34.9237	65.0763
	CP110 2 dots	CP110 1 dot	cell number		CP110 2 dots	CP110 1 dot	cell number		CP110 2 dots	CP110 1 dot	cell number		CP110 2 dots	CP110 1 dot	cell number		CP110 2 dots	CP110 1 dot	cell number		CP110 2 dots	CP110 1 dot	cell number			s.d.		5.81091	11.6218
KAN489-7	1	7	8	KAN489-8	4	9	13	KAN489-9	4	2	6	KAN489-10	2	6	8	KAN489-11	4	2	6	KAN489-12	1	8	9
2	2	7	9	2	4	4	8	2	3	7	10	2	0	6	6	2	1	3	4	2	0	12	12
3	0	6	6	3	6	5	11	3	4	6	10	3	1	8	9	3	2	3	5	3	0	11	11
4	0	6	6	4	4	4	8	4	4	2	6	4	1	6	7	4	4	4	8	4	2	9	11					CP110 2 dots	CP110 1 dot
5	0	5	5	5	7	3	10	5	1	3	4	5	4	5	9	5	1	2	3	5	1	11	12			KAN489-3	NCS1KO	45.098	54.902
6	0	4	4	6	3	5	8	6	5	4	9	6	3	5	8	6			0	6	1	11	12			KAN489-9	NCS1KO	46.6667	53.3333
7	0	4	4	7				7				7				7				7						KAN489-15	NCS1KO	51.8519	48.1481
8				8				8				8				8				8						Average		47.8722	52.1278
9				9				9				9				9				9						SEM		1.7673	3.53461
10				10				10				10				10				10
	3	39	42		28	30	58		21	24	45		11	36	47		12	14	26		5	62	67
	7.14286	92.8571			48.2759	51.7241			46.6667	53.3333			23.4043	76.5957			46.1538	53.8462			7.46269	92.5373
																												CP110 2 dots	CP110 1 dot
																										KAN489-4	C3orf14KO	10.4167	89.5833
	CP110 2 dots	CP110 1 dot	cell number		CP110 2 dots	CP110 1 dot	cell number		CP110 2 dots	CP110 1 dot	cell number		CP110 2 dots	CP110 1 dot	cell number		CP110 2 dots	CP110 1 dot	cell number		CP110 2 dots	CP110 1 dot	cell number			KAN489-10	C3orf14KO	23.4043	76.5957
KAN489-13	1	9	10	KAN489-14	0	6	6	KAN489-15	4	7	11	KAN489-16	1	8	9	KAN489-17	9	3	12	KAN489-18	0	15	15			KAN489-16	C3orf14KO	15.2778	84.7222
2	1	9	10	2	5	3	8	2	6	1	7	2	3	9	12	2	5	2	7	2	1	11	12			Average		16.3662	83.6338
3	1	12	13	3	1	8	9	3	0	4	4	3	2	10	12	3	8	1	9	3	1	11	12			SEM		3.28093	6.56185
4	1	10	11	4	2	5	7	4	4	3	7	4	1	10	11	4	5	1	6	4	1	14	15
5	2	9	11	5	3	7	10	5	5	4	9	5	2	12	14	5	6	1	7	5	3	10	13
6	1	7	8	6	4	7	11	6	9	7	16	6	2	12	14	6	4	3	7	6	0	8	8
7				7				7				7				7				7								CP110 2 dots	CP110 1 dot
8				8				8				8				8				8						KAN489-5	Rab34 KO	51.6129	48.3871
9				9				9				9				9				9						KAN489-11	Rab34 KO	46.1538	53.8462
10				10				10				10				10				10						KAN489-17	Rab34 KO	77.0833	22.9167
	7	56	63		15	36	51		28	26	54		11	61	72		37	11	48		6	69	75			Average		58.2834	41.7166
	11.1111	88.8889			29.4118	70.5882			51.8519	48.1481			15.2778	84.7222			77.0833	22.9167			8	92				SEM		8.25423	16.5085
																												CP110 2 dots	CP110 1 dot
																										KAN489-6	Myo5A KO	5.26316	94.7368
																										KAN489-12	Myo5A KO	7.46269	92.5373
																										KAN489-18	Myo5A KO	8	92
																										Average		6.90861	93.0914
																										s.d.		0.837222	1.45011

## Sheet: IF condition
Exp. number	Cell line	Gene induced	Culture condition, fixation condition	rabbit-Alexa488	mouse IgG2a-Alexa568	mouse IgG2b-Alexa647	Nuclear stain	Date	Replicate
KAN489-1	RPE-BFP-Cas9 pMCB306 (pool)	Serum starved for 24 hours	Fixed in 100% methanol at -20C for 5 minutes.	CP110, Proteintech, 12780-1-AP, 1:1000	CEP164, sc-515403, Santa Cruz, 1:500	FGFR1OP,H00011116-M01, 1:1000	DAPI	2019-05-14	No.2
KAN489-2	RPE-BFP-Cas9 CEP89KO (pool)	Serum starved for 24 hours	Fixed in 100% methanol at -20C for 5 minutes.	CP110, Proteintech, 12780-1-AP, 1:1000	CEP164, sc-515403, Santa Cruz, 1:500	FGFR1OP,H00011116-M01, 1:1000	DAPI	2019-05-14	No.2
KAN489-3	RPE-BFP-Cas9 NCS1KO (pool)	Serum starved for 24 hours	Fixed in 100% methanol at -20C for 5 minutes.	CP110, Proteintech, 12780-1-AP, 1:1000	CEP164, sc-515403, Santa Cruz, 1:500	FGFR1OP,H00011116-M01, 1:1000	DAPI	2019-05-14	No.2
KAN489-4	RPE-BFP-Cas9 C3orf14KO (pool)	Serum starved for 24 hours	Fixed in 100% methanol at -20C for 5 minutes.	CP110, Proteintech, 12780-1-AP, 1:1000	CEP164, sc-515403, Santa Cruz, 1:500	FGFR1OP,H00011116-M01, 1:1000	DAPI	2019-05-14	No.2
KAN489-5	RPE-BFP-Cas9 Rab34KO (pool)	Serum starved for 24 hours	Fixed in 100% methanol at -20C for 5 minutes.	CP110, Proteintech, 12780-1-AP, 1:1000	CEP164, sc-515403, Santa Cruz, 1:500	FGFR1OP,H00011116-M01, 1:1000	DAPI	2019-05-14	No.2
KAN489-6	RPE-BFP-Cas9 Myo5AKO (pool)	Serum starved for 24 hours	Fixed in 100% methanol at -20C for 5 minutes.	CP110, Proteintech, 12780-1-AP, 1:1000	CEP164, sc-515403, Santa Cruz, 1:500	FGFR1OP,H00011116-M01, 1:1000	DAPI	2019-05-14	No.2
KAN489-7	RPE-BFP-Cas9 pMCB306 (pool)	Serum starved for 24 hours	Fixed in 100% methanol at -20C for 5 minutes.	CP110, Proteintech, 12780-1-AP, 1:1000	CEP164, sc-515403, Santa Cruz, 1:500	FGFR1OP,H00011116-M01, 1:1000	DAPI	2019-05-14	No.3
KAN489-8	RPE-BFP-Cas9 CEP89KO (pool)	Serum starved for 24 hours	Fixed in 100% methanol at -20C for 5 minutes.	CP110, Proteintech, 12780-1-AP, 1:1000	CEP164, sc-515403, Santa Cruz, 1:500	FGFR1OP,H00011116-M01, 1:1000	DAPI	2019-05-14	No.3
KAN489-9	RPE-BFP-Cas9 NCS1KO (pool)	Serum starved for 24 hours	Fixed in 100% methanol at -20C for 5 minutes.	CP110, Proteintech, 12780-1-AP, 1:1000	CEP164, sc-515403, Santa Cruz, 1:500	FGFR1OP,H00011116-M01, 1:1000	DAPI	2019-05-14	No.3
KAN489-10	RPE-BFP-Cas9 C3orf14KO (pool)	Serum starved for 24 hours	Fixed in 100% methanol at -20C for 5 minutes.	CP110, Proteintech, 12780-1-AP, 1:1000	CEP164, sc-515403, Santa Cruz, 1:500	FGFR1OP,H00011116-M01, 1:1000	DAPI	2019-05-14	No.3
KAN489-11	RPE-BFP-Cas9 Rab34KO (pool)	Serum starved for 24 hours	Fixed in 100% methanol at -20C for 5 minutes.	CP110, Proteintech, 12780-1-AP, 1:1000	CEP164, sc-515403, Santa Cruz, 1:500	FGFR1OP,H00011116-M01, 1:1000	DAPI	2019-05-14	No.3
KAN489-12	RPE-BFP-Cas9 Myo5AKO (pool)	Serum starved for 24 hours	Fixed in 100% methanol at -20C for 5 minutes.	CP110, Proteintech, 12780-1-AP, 1:1000	CEP164, sc-515403, Santa Cruz, 1:500	FGFR1OP,H00011116-M01, 1:1000	DAPI	2019-05-14	No.3
KAN489-13	RPE-BFP-Cas9 pMCB306 (pool)	Serum starved for 24 hours	Fixed in 100% methanol at -20C for 5 minutes.	CP110, Proteintech, 12780-1-AP, 1:1000	CEP164, sc-515403, Santa Cruz, 1:500	FGFR1OP,H00011116-M01, 1:1000	DAPI	2019-05-14	No.4
KAN489-14	RPE-BFP-Cas9 CEP89KO (pool)	Serum starved for 24 hours	Fixed in 100% methanol at -20C for 5 minutes.	CP110, Proteintech, 12780-1-AP, 1:1000	CEP164, sc-515403, Santa Cruz, 1:500	FGFR1OP,H00011116-M01, 1:1000	DAPI	2019-05-14	No.4
KAN489-15	RPE-BFP-Cas9 NCS1KO (pool)	Serum starved for 24 hours	Fixed in 100% methanol at -20C for 5 minutes.	CP110, Proteintech, 12780-1-AP, 1:1000	CEP164, sc-515403, Santa Cruz, 1:500	FGFR1OP,H00011116-M01, 1:1000	DAPI	2019-05-14	No.4
KAN489-16	RPE-BFP-Cas9 C3orf14KO (pool)	Serum starved for 24 hours	Fixed in 100% methanol at -20C for 5 minutes.	CP110, Proteintech, 12780-1-AP, 1:1000	CEP164, sc-515403, Santa Cruz, 1:500	FGFR1OP,H00011116-M01, 1:1000	DAPI	2019-05-14	No.4
KAN489-17	RPE-BFP-Cas9 Rab34KO (pool)	Serum starved for 24 hours	Fixed in 100% methanol at -20C for 5 minutes.	CP110, Proteintech, 12780-1-AP, 1:1000	CEP164, sc-515403, Santa Cruz, 1:500	FGFR1OP,H00011116-M01, 1:1000	DAPI	2019-05-14	No.4
KAN489-18	RPE-BFP-Cas9 Myo5AKO (pool)	Serum starved for 24 hours	Fixed in 100% methanol at -20C for 5 minutes.	CP110, Proteintech, 12780-1-AP, 1:1000	CEP164, sc-515403, Santa Cruz, 1:500	FGFR1OP,H00011116-M01, 1:1000	DAPI	2019-05-14	No.4

## Sheet: Statistics(Rab34-Myo5A, Fig.4D)
	sgGFP v.s. RAB34 KO				sgGFP v.s. MYO5A KO
	Table Analyzed	Data 1			Table Analyzed	Data 1
	Column B	RAB34 KO			Column C	MYO5A KO
	vs.	vs.			vs.	vs.
	Column A	sgGFP			Column A	sgGFP
	Unpaired t test with Welch's correction				Unpaired t test with Welch's correction
	P value	0.0284			P value	0.8629
	P value summary	*			P value summary	ns
	Significantly different (P < 0.05)?	Yes			Significantly different (P < 0.05)?	No
	One- or two-tailed P value?	Two-tailed			One- or two-tailed P value?	Two-tailed
	Welch-corrected t, df	t=5.217, df=2.198			Welch-corrected t, df	t=0.1903, df=2.609
	How big is the difference?				How big is the difference?
	Mean of column A	7.343			Mean of column A	7.343
	Mean of column B	58.28			Mean of column C	6.909
	Difference between means (B - A) ± SEM	50.94 ± 9.764			Difference between means (C - A) ± SEM	-0.4339 ± 2.280
	95% confidence interval	12.35 to 89.53			95% confidence interval	-8.345 to 7.478
	R squared (eta squared)	0.9253			R squared (eta squared)	0.0137

## Sheet: Statistics#2 (ANOVA with multi)
Table Analyzed	Data 1		Number of families	1
Data sets analyzed	A-C		Number of comparisons per family	2
			Alpha	0.05
ANOVA summary
F	27.25		Šídák's multiple comparisons test	Mean Diff.	95.00% CI of diff.	Below threshold?	Summary	Adjusted P Value	A-?
P value	0.001		sgGFP vs. RAB34 KO	-50.94	-74.62 to -27.27	Yes	**	0.0014	B	RAB34 KO
P value summary	***		sgGFP vs. MYO5A KO	0.4339	-23.24 to 24.11	No	ns	0.9983	C	MYO5A KO
Significant diff. among means (P < 0.05)?	Yes
R squared	0.9008		Test details	Mean 1	Mean 2	Mean Diff.	SE of diff.	n1	n2	t	DF
			sgGFP vs. RAB34 KO	7.343	58.28	-50.94	8.002	3	3	6.366	6
Brown-Forsythe test			sgGFP vs. MYO5A KO	7.343	6.909	0.4339	8.002	3	3	0.05423	6
F (DFn, DFd)	1.232 (2, 6)
P value	0.3563
P value summary	ns
Are SDs significantly different (P < 0.05)?	No
Bartlett's test
Bartlett's statistic (corrected)
P value
P value summary
Are SDs significantly different (P < 0.05)?
ANOVA table	SS
Treatment (between columns)	5235
Residual (within columns)	576.2
Total	5811
Data summary
Number of treatments (columns)	3
Number of values (total)	9
