# Supplementary material for: A hierarchical pathway for assembly of the distal appendages that organize primary cilia
Source: eLife. 2025 Jan 30;14:e85999. doi: 10.7554/eLife.85999 (PMC11984956; doi:10.7554/eLife.85999)
Supplement: Figure 4—source data 4. [file elife-85999-fig4-data4.xlsx]

## Sheet: Raw data
		Label	Area	Mean	Min	Max	X	Y	Circ	IntDen	RawIntDen	AR	Round	Noramlized Intensity
	sgGFP
1	IFT88_KAN487-1_2.tif:0001-0101	1.027	212.857	0	1128	100.285	10.357	0.873	218.652	20860	1.317	0.759	0.912	1.14917
2	IFT88_KAN487-1_2.tif:0002-0410	1.457	195.065	0	1203	113.268	41.983	0.891	284.205	27114	1.316	0.76	0.894	1.4937
3	IFT88_KAN487-1_2.tif:0003-0458	0.985	198.947	0	957	87.717	46.913	0.966	196.021	18701	1.097	0.911	0.935	1.03023
4	IFT88_KAN487-1_2.tif:0004-0481	1.195	126.518	0	523	32.414	49.312	0.96	151.18	14423	1.296	0.771	0.931	0.794556
5	IFT88_KAN487-1_2.tif:0005-0637	0.901	188.209	0	633	58.494	65.25	0.96	169.659	16186	1.25	0.8	0.945	0.891679
6	IFT88_KAN487-1_2.tif:0006-0670	1.038	218.364	0	1016	15.277	68.621	0.86	226.597	21618	1.447	0.691	0.888	1.19093
7	IFT88_KAN487-1_2.tif:0007-0730	1.226	213.752	0	1333	96.152	74.732	0.901	262.141	25009	1.407	0.71	0.936	1.37773
8	IFT88_KAN487-1_2.tif:0008-0806	1.394	145.872	0	1375	135.746	82.557	0.885	203.359	19401	1.466	0.682	0.911	1.06879
9	IFT88_KAN487-1_2.tif:0009-0814	0.755	118.833	0	691	63.075	83.368	0.923	89.683	8556	1.275	0.784	0.954	0.471346
10	IFT88_KAN487-1_2.tif:0010-0994	1.373	295.527	0	1391	104.677	101.83	0.827	405.795	38714	1.64	0.61	0.897	2.13274
11	IFT88_KAN487-1_3.tif:0001-0050	1.09	127.087	0	850	12.284	5.12	0.861	138.539	13217	1.181	0.847	0.904	0.728118
12	IFT88_KAN487-1_3.tif:0002-0352	0.839	111.287	0	423	54.042	36.117	0.973	93.32	8903	1.176	0.85	0.952	0.490462
13	IFT88_KAN487-1_3.tif:0003-0384	0.943	227.489	0	1051	98.297	39.329	0.925	214.606	20474	1.117	0.896	0.933	1.1279
14	IFT88_KAN487-1_3.tif:0004-0434	1.122	146.056	0	1011	26.181	44.455	0.859	163.81	15628	1.641	0.609	0.926	0.860939
15	IFT88_KAN487-1_3.tif:0005-0480	1.069	120	0	578	61.437	49.181	1	128.298	12240	1.161	0.861	0.949	0.674296
16	IFT88_KAN487-1_3.tif:0006-0603	1.069	233.765	0	1277	108.115	61.755	0.938	249.929	23844	1.179	0.848	0.936	1.31355
17	IFT88_KAN487-1_3.tif:0007-0685	1.08	144.379	0	956	16.011	70.19	0.878	155.876	14871	1.304	0.767	0.924	0.819236
18	IFT88_KAN487-1_3.tif:0008-0695	0.629	1093.52	28	3770	97.17	71.133	0.969	687.725	65611	1.066	0.938	0.976	3.61448
19	IFT88_KAN487-1_3.tif:0009-0847	1.184	165.124	0	930	116.58	86.75	0.896	195.581	18659	1.094	0.914	0.915	1.02792
20	IFT88_KAN487-1_3.tif:0010-0898	0.996	195.958	0	1026	47.937	91.966	0.902	195.13	18616	1.216	0.822	0.922	1.02555
21	IFT88_KAN487-1_3.tif:0011-1003	0.786	80.987	0	440	77.85	102.776	0.867	63.667	6074	1.296	0.772	0.893	0.334614
22	IFT88_KAN487-1_4.tif:0001-0140	1.132	351.898	0	1618	96.618	14.312	0.883	398.363	38005	1.205	0.83	0.889	2.09368
23	IFT88_KAN487-1_4.tif:0002-0270	1.132	125.269	0	590	40.819	27.657	0.921	141.809	13529	1.298	0.77	0.935	0.745306
24	IFT88_KAN487-1_4.tif:0003-0419	1.163	140.622	0	918	94.3	42.894	0.831	163.611	15609	1.347	0.742	0.899	0.859892
25	IFT88_KAN487-1_4.tif:0004-0502	1.101	255.895	0	1177	122.211	51.446	0.833	281.637	26869	1.409	0.71	0.897	1.4802
26	IFT88_KAN487-1_4.tif:0005-0565	1.027	97.735	0	608	34.92	57.854	0.993	100.395	9578	1.168	0.856	0.942	0.527647
27	IFT88_KAN487-1_4.tif:0006-0586	0.88	13.036	0	74	72.695	60.044	0.971	11.478	1095	1.014	0.986	0.933	0.060323
28	IFT88_KAN487-1_4.tif:0007-0667	0.985	71.149	0	224	117.87	68.367	0.985	70.103	6688	1.185	0.844	0.922	0.368439
29	IFT88_KAN487-1_4.tif:0008-0876	1.09	218.375	0	1145	96.391	89.695	0.915	238.054	22711	1.13	0.885	0.904	1.25114
30	IFT88_KAN487-1_4.tif:0009-0956	0.828	305.291	0	1209	17.379	97.935	0.961	252.801	24118	1.255	0.797	0.958	1.32865
31	IFT88_KAN487-1_5.tif:0001-0227	0.765	61.877	0	324	59.978	23.237	0.942	47.347	4517	1.365	0.733	0.89	0.248839
32	IFT88_KAN487-1_5.tif:0002-0339	1.174	149.429	0	721	114.338	34.745	0.889	175.424	16736	1.421	0.704	0.914	0.921978
33	IFT88_KAN487-1_5.tif:0003-0419	0.692	215.818	0	830	11.813	42.964	0.865	149.304	14244	1.182	0.846	0.886	0.784695
34	IFT88_KAN487-1_5.tif:0004-0487	1.132	138.574	0	848	69.633	49.876	0.735	156.872	14966	2.344	0.427	0.908	0.82447
35	IFT88_KAN487-1_5.tif:0005-0506	0.912	257.621	0	1155	101.607	51.816	0.894	234.93	22413	1.211	0.826	0.911	1.23472
36	IFT88_KAN487-1_5.tif:0006-0856	1.08	109.621	0	621	96.829	87.61	0.867	118.351	11291	1.524	0.656	0.888	0.622016
37	IFT88_KAN487-1_5.tif:0007-0927	0.839	262.625	0	1186	64.349	94.885	0.939	220.224	21010	1.122	0.892	0.947	1.15743
38	IFT88_KAN487-1_5.tif:0008-0927	0.943	92.589	0	550	101.472	94.956	0.976	87.345	8333	1.158	0.864	0.905	0.459061
39	IFT88_KAN487-1_5.tif:0009-0987	0.734	41.357	0	375	38.092	101.135	0.821	30.345	2895	1.372	0.729	0.892	0.159484
40	IFT88_KAN487-1_6.tif:0001-0069	0.87	148.59	0	871	47.417	7.054	0.895	129.273	12333	1.198	0.835	0.922	0.679419
41	IFT88_KAN487-1_6.tif:0002-0152	0.901	79.988	0	515	108.665	15.632	0.927	72.105	6879	1.399	0.715	0.945	0.378961
42	IFT88_KAN487-1_6.tif:0003-0158	1.038	116.273	0	315	54.042	16.219	0.971	120.657	11511	1.029	0.972	0.934	0.634135
43	IFT88_KAN487-1_6.tif:0004-0241	1.048	137.42	0	678	18.356	24.677	0.967	144.042	13742	1.11	0.901	0.922	0.75704
44	IFT88_KAN487-1_6.tif:0005-0437	0.975	117.376	0	813	59.462	44.752	0.969	114.42	10916	1.114	0.898	0.969	0.601357
45	IFT88_KAN487-1_6.tif:0006-0506	1.3	211.694	0	1274	127.563	51.857	0.867	275.149	26250	1.4	0.714	0.932	1.4461
46	IFT88_KAN487-1_6.tif:0007-0517	0.639	214.607	0	807	13.144	52.944	0.892	137.218	13091	1.387	0.721	0.931	0.721177
47	IFT88_KAN487-1_6.tif:0008-0560	1.08	225.466	0	1187	85.276	57.309	0.852	243.42	23223	1.2	0.834	0.888	1.27934
48	IFT88_KAN487-1_6.tif:0009-0574	1.195	218.114	0	1360	139.219	58.811	0.932	260.631	24865	1.255	0.797	0.931	1.3698
49	IFT88_KAN487-1_6.tif:0010-0869	1.384	243.136	0	1643	80.315	89.02	0.888	336.405	32094	1.052	0.951	0.92	1.76804
50	IFT88_KAN487-1_6.tif:0011-0915	1.08	192.097	0	1077	40.551	93.668	0.852	207.394	19786	1.402	0.713	0.916	1.09
51	IFT88_KAN487-1_6.tif:0012-1008	1.415	205.556	0	1381	104.17	103.263	0.923	290.872	27750	1.14	0.877	0.906	1.52873
										18152.3				1
	CEP89 KO
52	IFT88_KAN487-2_1.tif:0001-0016	1.331	167.866	0	1163	111.692	1.664	0.832	223.463	21319	1.159	0.863	0.882	1.17445
53	IFT88_KAN487-2_1.tif:0002-0152	1.017	187	0	936	9.895	15.601	0.951	190.13	18139	1.054	0.949	0.928	0.999269
54	IFT88_KAN487-2_1.tif:0003-0331	1.163	163.207	0	1048	117.882	33.913	0.881	189.889	18116	1.416	0.706	0.925	0.998002
55	IFT88_KAN487-2_1.tif:0004-0411	0.88	149.548	10	425	126.604	42.109	0.957	131.673	12562	1.104	0.906	0.918	0.692034
56	IFT88_KAN487-2_1.tif:0005-0493	1.09	161.942	0	864	4.982	50.451	0.887	176.535	16842	1.405	0.712	0.929	0.927818
57	IFT88_KAN487-2_1.tif:0006-0545	0.849	162.889	0	804	13.713	55.807	0.861	138.298	13194	1.514	0.661	0.885	0.726851
58	IFT88_KAN487-2_1.tif:0007-0560	1.006	102.198	0	475	116.043	57.299	0.899	102.838	9811	1.306	0.766	0.901	0.540483
59	IFT88_KAN487-2_1.tif:0008-0562	0.818	91.795	0	609	87.407	57.602	0.915	75.05	7160	1.278	0.783	0.934	0.394441
60	IFT88_KAN487-2_1.tif:0009-0586	1.205	134.313	0	853	69.993	60.021	0.841	161.903	15446	1.472	0.679	0.885	0.850913
61	IFT88_KAN487-2_1.tif:0010-0621	1.006	102.656	0	791	31.304	63.565	0.911	103.299	9855	1.272	0.786	0.914	0.542907
62	IFT88_KAN487-2_1.tif:0011-0834	0.922	204.17	0	637	101.094	85.402	0.917	188.328	17967	1.136	0.88	0.951	0.989793
63	IFT88_KAN487-2_1.tif:0012-0882	0.943	158.989	0	752	35.947	90.319	1	149.985	14309	1.098	0.91	0.963	0.788276
64	IFT88_KAN487-2_1.tif:0013-0909	1.247	129	0	1009	63.918	93.034	0.856	160.907	15351	1.598	0.626	0.919	0.845679
65	IFT88_KAN487-2_1.tif:0014-0925	0.964	156.109	0	806	37.804	94.74	0.82	150.54	14362	1.599	0.625	0.902	0.791196
66	IFT88_KAN487-2_2.tif:0001-0126	0.912	64.989	0	527	15.711	12.917	0.925	59.264	5654	1.091	0.916	0.921	0.311476
67	IFT88_KAN487-2_2.tif:0002-0140	1.143	146.33	0	963	131.225	14.38	0.742	167.186	15950	1.697	0.589	0.852	0.878678
68	IFT88_KAN487-2_2.tif:0003-0239	0.702	180.284	15	432	86.661	24.5	1	126.61	12079	1.101	0.909	0.924	0.665426
69	IFT88_KAN487-2_2.tif:0004-0264	0.839	86.138	0	719	17.778	27.044	0.959	72.23	6891	1.101	0.908	0.925	0.379622
70	IFT88_KAN487-2_2.tif:0005-0307	0.818	105.09	0	525	75.663	31.441	0.935	85.92	8197	1.029	0.972	0.907	0.451569
71	IFT88_KAN487-2_2.tif:0006-0388	0.891	192.365	0	893	38.278	39.769	0.845	171.389	16351	1.45	0.689	0.89	0.900769
72	IFT88_KAN487-2_2.tif:0007-0467	1.216	130.828	0	791	141.571	47.733	0.894	159.073	15176	1.167	0.857	0.935	0.836038
73	IFT88_KAN487-2_2.tif:0008-0611	1.027	83.673	0	303	3.615	62.613	0.93	85.951	8200	1.435	0.697	0.933	0.451734
74	IFT88_KAN487-2_2.tif:0009-0648	1.499	147.818	0	1287	44.995	66.322	0.827	221.566	21138	1.501	0.666	0.914	1.16448
75	IFT88_KAN487-2_2.tif:0010-0691	1.205	117.052	0	650	74.32	70.816	0.928	141.096	13461	1.039	0.963	0.906	0.74156
76	IFT88_KAN487-2_2.tif:0011-0798	0.86	180.22	0	445	11.986	81.795	0.948	154.901	14778	1.234	0.811	0.932	0.814113
77	IFT88_KAN487-2_2.tif:0012-0812	1.258	150.983	0	1125	101.949	83.094	0.863	189.91	18118	1.451	0.689	0.927	0.998112
78	IFT88_KAN487-2_2.tif:0013-0926	1.069	40.578	0	132	132.665	94.828	0.955	43.384	4139	1.113	0.898	0.915	0.228016
79	IFT88_KAN487-2_2.tif:0014-0939	1.006	155.969	0	525	79.968	96.154	0.941	156.945	14973	1.169	0.856	0.923	0.824855
80	IFT88_KAN487-2_2.tif:0015-1013	1.174	245.679	0	1182	14.54	103.778	0.899	288.419	27516	1.306	0.765	0.937	1.51584
81	IFT88_KAN487-2_3.tif:0001-0117	1.205	203.835	0	1195	114.817	12.003	0.912	245.705	23441	1.17	0.855	0.913	1.29135
82	IFT88_KAN487-2_3.tif:0002-0183	1.163	114.568	0	772	83.529	18.72	0.881	133.298	12717	1.407	0.711	0.917	0.700573
83	IFT88_KAN487-2_3.tif:0003-0285	1.226	169.436	0	963	45.252	29.169	0.928	207.792	19824	1.204	0.831	0.925	1.09209
84	IFT88_KAN487-2_3.tif:0004-0325	1.363	246.977	0	1948	122.034	33.305	0.865	336.541	32107	1.648	0.607	0.919	1.76876
85	IFT88_KAN487-2_3.tif:0005-0446	1.268	109.215	0	654	73.22	45.678	0.814	138.518	13215	1.542	0.648	0.89	0.728008
86	IFT88_KAN487-2_3.tif:0006-0552	1.006	67.583	0	239	97.091	56.557	0.941	68.006	6488	1.069	0.935	0.919	0.357421
87	IFT88_KAN487-2_3.tif:0007-0569	1.069	158.912	0	1060	11.882	58.259	0.938	169.9	16209	1.214	0.823	0.927	0.892946
88	IFT88_KAN487-2_3.tif:0008-0699	1.069	192.794	0	1210	49.671	71.548	0.909	206.126	19665	1.263	0.792	0.936	1.08334
89	IFT88_KAN487-2_3.tif:0009-0758	1.101	43.448	0	192	137.274	77.652	0.884	47.818	4562	1.429	0.7	0.909	0.251318
90	IFT88_KAN487-2_3.tif:0010-0800	1.499	178.608	0	1127	109.525	81.858	0.76	267.717	25541	1.543	0.648	0.875	1.40704
91	IFT88_KAN487-2_3.tif:0011-0874	1.163	161.369	0	1012	51.671	89.482	0.947	187.751	17912	1.101	0.908	0.953	0.986763
92	IFT88_KAN487-2_3.tif:0012-0996	1.132	243.269	0	1544	113.882	102.022	0.95	275.39	26273	1.133	0.883	0.927	1.44737
93	IFT88_KAN487-2_4.tif:0001-0100	0.964	159.304	0	691	133.283	10.223	0.964	153.622	14656	1.24	0.807	0.911	0.807392
94	IFT88_KAN487-2_4.tif:0002-0234	0.807	83.948	0	296	130.18	23.98	0.937	67.755	6464	1.416	0.706	0.939	0.356099
95	IFT88_KAN487-2_4.tif:0003-0238	0.86	156.598	0	792	86.986	24.382	0.854	134.598	12841	1.636	0.611	0.937	0.707404
96	IFT88_KAN487-2_4.tif:0004-0270	0.943	161.656	0	945	55.916	27.693	0.957	152.501	14549	1.417	0.706	0.942	0.801497
97	IFT88_KAN487-2_4.tif:0005-0318	0.996	128.842	0	447	12.751	32.585	0.932	128.298	12240	1.232	0.812	0.927	0.674296
98	IFT88_KAN487-2_4.tif:0006-0342	0.681	147.123	0	529	125.487	35.072	0.99	100.238	9563	1.114	0.898	0.963	0.526821
99	IFT88_KAN487-2_4.tif:0007-0417	1.017	180.299	0	974	93.279	42.699	0.983	183.317	17489	1.289	0.776	0.928	0.963461
100	IFT88_KAN487-2_4.tif:0008-0573	0.839	211.975	0	934	20.192	58.634	0.862	177.751	16958	1.566	0.638	0.93	0.934208
101	IFT88_KAN487-2_4.tif:0009-0588	0.639	115.082	0	497	41.522	60.199	0.929	73.583	7020	1.503	0.665	0.938	0.386728
102	IFT88_KAN487-2_4.tif:0010-0706	1.101	182.486	0	1145	90.54	72.278	0.953	200.843	19161	1.153	0.867	0.933	1.05557
103	IFT88_KAN487-2_4.tif:0011-0752	1.101	188	0	1114	10.358	77.038	0.924	206.912	19740	1.147	0.872	0.909	1.08747
104	IFT88_KAN487-2_4.tif:0012-0924	1.111	344.934	0	1958	102.468	94.667	0.962	383.248	36563	1.366	0.732	0.938	2.01424
105	IFT88_KAN487-2_5.tif:0001-0093	1.069	205.765	0	1221	51.307	9.568	0.844	219.993	20988	1.272	0.786	0.895	1.15622
106	IFT88_KAN487-2_5.tif:0002-0094	1.488	346.585	0	2489	105.061	9.657	0.851	515.865	49215	1.857	0.539	0.95	2.71123
107	IFT88_KAN487-2_5.tif:0003-0096	1.331	213.874	0	1557	134.999	9.885	0.913	284.708	27162	1.313	0.761	0.927	1.49634
108	IFT88_KAN487-2_5.tif:0004-0198	0.964	195.033	0	927	2.402	20.34	0.927	188.076	17943	1.213	0.824	0.968	0.988471
109	IFT88_KAN487-2_5.tif:0005-0231	1.457	227.295	0	1349	141.063	23.644	0.784	331.164	31594	1.531	0.653	0.869	1.7405
110	IFT88_KAN487-2_5.tif:0006-0341	0.713	123.956	0	401	99.269	34.978	0.941	88.352	8429	1.307	0.765	0.938	0.46435
111	IFT88_KAN487-2_5.tif:0007-0374	0.943	68.511	0	293	12.551	38.271	0.99	64.631	6166	1.202	0.832	0.933	0.339682
112	IFT88_KAN487-2_5.tif:0008-0417	0.996	208.095	0	1371	93.105	42.708	0.862	207.216	19769	1.284	0.779	0.884	1.08906
113	IFT88_KAN487-2_5.tif:0009-0509	1.059	71.98	0	343	24.522	52.133	0.917	76.203	7270	1.222	0.819	0.91	0.400501
114	IFT88_KAN487-2_5.tif:0010-0579	1.352	173.744	0	1233	97.804	59.34	0.845	234.93	22413	1.36	0.735	0.905	1.23472
115	IFT88_KAN487-2_5.tif:0011-0727	1.373	141.038	0	1017	48.094	74.488	0.805	193.663	18476	1.653	0.605	0.913	1.01783
116	IFT88_KAN487-2_5.tif:0012-0733	0.996	160.895	0	819	6.388	75.136	0.902	160.215	15285	1.552	0.644	0.931	0.842043
117	IFT88_KAN487-2_5.tif:0013-0837	1.499	226.448	0	1870	131.394	85.771	0.87	339.424	32382	1.493	0.67	0.923	1.78391
118	IFT88_KAN487-2_5.tif:0014-0989	1.52	227.338	0	1617	79.783	101.396	0.711	345.524	32964	1.293	0.773	0.826	1.81597
119	IFT88_KAN487-2_5.tif:0015-1001	0.996	197.979	0	1029	16.8	102.525	0.944	197.143	18808	1.135	0.881	0.941	1.03612
120	IFT88_KAN487-2_6.tif:0001-0104	0.912	306.517	0	1410	5.035	10.687	0.894	279.52	26667	1.336	0.748	0.902	1.46907
121	IFT88_KAN487-2_6.tif:0002-0105	1.216	146.112	0	893	75.351	10.779	0.858	177.657	16949	1.47	0.68	0.91	0.933712
122	IFT88_KAN487-2_6.tif:0003-0221	1.038	253.727	0	1587	116.287	22.694	0.91	263.294	25119	1.445	0.692	0.938	1.38379
123	IFT88_KAN487-2_6.tif:0004-0282	1.583	138.073	0	1104	43.769	28.824	0.795	218.536	20849	1.583	0.632	0.886	1.14856
124	IFT88_KAN487-2_6.tif:0005-0348	1.027	221.378	0	1299	107.254	35.664	0.873	227.404	21695	1.464	0.683	0.92	1.19517
125	IFT88_KAN487-2_6.tif:0006-0438	0.828	221.418	0	971	9.12	44.871	0.927	183.349	17492	1.139	0.878	0.952	0.963626
126	IFT88_KAN487-2_6.tif:0007-0502	1.059	124.158	0	927	66.945	51.4	0.929	131.443	12540	1.269	0.788	0.931	0.690823
127	IFT88_KAN487-2_6.tif:0008-0516	1.111	235.547	0	1452	123.588	52.851	0.893	261.711	24968	1.27	0.788	0.918	1.37548
128	IFT88_KAN487-2_6.tif:0009-0686	0.933	119.36	0	631	74.521	70.189	0.873	111.349	10623	1.33	0.752	0.918	0.585216
129	IFT88_KAN487-2_6.tif:0010-0731	0.964	133.348	0	647	7.104	74.872	0.873	128.591	12268	1.123	0.89	0.889	0.675838
130	IFT88_KAN487-2_6.tif:0011-0826	1.216	203.379	0	1339	129.603	84.615	0.92	247.288	23592	1.355	0.738	0.932	1.29967
131	IFT88_KAN487-2_6.tif:0012-0900	0.975	121.903	0	720	23.917	92.227	0.866	118.833	11337	1.406	0.711	0.949	0.62455
										17065.2				0.940113
	C3ORF14 KO
132	IFT88_KAN487-3_1.tif:0001-0058	1.027	165.173	0	882	126.573	5.979	0.901	169.67	16187	1.023	0.977	0.916	0.891734
133	IFT88_KAN487-3_1.tif:0002-0129	0.912	132	0	855	99.882	13.197	0.837	120.374	11484	1.699	0.588	0.941	0.632648
134	IFT88_KAN487-3_1.tif:0003-0176	0.88	122.464	0	559	15.048	18.029	0.992	107.827	10287	1.113	0.899	0.918	0.566706
135	IFT88_KAN487-3_1.tif:0004-0270	1.216	155.086	0	875	52.869	27.698	0.92	188.569	17990	1.084	0.922	0.921	0.99106
136	IFT88_KAN487-3_1.tif:0005-0312	0.975	87.71	0	231	86.533	31.892	0.924	85.501	8157	1.366	0.732	0.954	0.449365
137	IFT88_KAN487-3_1.tif:0006-0410	1.09	164.904	0	883	140.475	42.005	0.956	179.764	17150	1.156	0.865	0.95	0.944785
138	IFT88_KAN487-3_1.tif:0007-0414	0.912	103.782	0	550	68.974	42.444	0.957	94.641	9029	1.303	0.767	0.93	0.497403
139	IFT88_KAN487-3_1.tif:0008-0431	0.964	116.261	0	649	36.893	44.206	0.82	112.114	10696	1.21	0.826	0.889	0.589237
140	IFT88_KAN487-3_1.tif:0009-0447	1.069	176.127	0	825	14.188	45.804	0.926	188.307	17965	1.378	0.725	0.923	0.989683
141	IFT88_KAN487-3_1.tif:0010-0541	1.059	156.248	0	662	127.912	55.449	0.929	165.414	15781	1.089	0.918	0.931	0.869368
142	IFT88_KAN487-3_1.tif:0011-0650	1.122	257.486	0	1402	97.709	66.546	0.953	288.786	27551	1.205	0.83	0.96	1.51777
143	IFT88_KAN487-3_1.tif:0012-0742	1.247	286.731	0	1451	89.923	76.052	0.856	357.652	34121	1.068	0.936	0.905	1.87971
144	IFT88_KAN487-3_1.tif:0013-0749	0.922	125.716	0	579	18.785	76.725	0.935	115.961	11063	1.351	0.74	0.931	0.609455
145	IFT88_KAN487-3_1.tif:0014-0757	1.321	194.563	0	1387	118.79	77.473	0.871	256.963	24515	1.292	0.774	0.913	1.35052
146	IFT88_KAN487-3_1.tif:0015-0760	1.289	206.276	0	984	40.865	77.801	0.86	265.946	25372	1.378	0.726	0.928	1.39773
147	IFT88_KAN487-3_1.tif:0016-0795	1.163	74.505	0	264	56.937	81.366	0.821	86.685	8270	1.531	0.653	0.888	0.45559
148	IFT88_KAN487-3_1.tif:0017-0914	1.006	188.906	0	509	16.74	93.607	1	190.089	18135	1.084	0.922	0.928	0.999048
149	IFT88_KAN487-3_1.tif:0018-1027	1.184	99.088	0	414	123.942	105.177	0.896	117.365	11197	1.29	0.775	0.922	0.616837
150	IFT88_KAN487-3_2.tif:0001-0136	0.964	200.707	0	827	134.443	13.944	0.885	193.548	18465	1.47	0.68	0.939	1.01723
151	IFT88_KAN487-3_2.tif:0002-0145	0.797	105.658	0	377	79.364	14.872	0.996	84.169	8030	1.088	0.919	0.944	0.442369
152	IFT88_KAN487-3_2.tif:0003-0172	1.101	97.6	0	451	23.112	17.599	0.953	107.418	10248	1.222	0.819	0.917	0.564557
153	IFT88_KAN487-3_2.tif:0004-0374	1.09	88.702	0	907	47.713	38.263	0.876	96.695	9225	1.279	0.782	0.912	0.508201
154	IFT88_KAN487-3_2.tif:0005-0509	1.499	200.196	0	1672	115.126	52.104	0.87	300.075	28628	1.394	0.717	0.905	1.5771
155	IFT88_KAN487-3_2.tif:0006-0575	1.038	220.414	0	868	33.35	58.934	0.927	228.725	21821	1.327	0.754	0.908	1.20211
156	IFT88_KAN487-3_2.tif:0007-0588	1.143	127.064	0	578	88.994	60.197	0.946	145.174	13850	1.178	0.849	0.912	0.76299
157	IFT88_KAN487-3_2.tif:0008-0610	1.069	291.343	0	1074	140.465	62.48	0.955	311.489	29717	1.095	0.913	0.923	1.6371
158	IFT88_KAN487-3_2.tif:0009-0685	1.279	162.975	0	1153	59.175	70.074	0.94	208.411	19883	1.103	0.907	0.953	1.09534
159	IFT88_KAN487-3_2.tif:0010-0868	1.195	197.447	0	1212	33.983	88.868	0.868	235.936	22509	1.198	0.835	0.898	1.24001
160	IFT88_KAN487-3_2.tif:0011-0900	1.122	169.561	0	598	88.168	92.201	0.971	190.172	18143	1.099	0.91	0.926	0.999489
161	IFT88_KAN487-3_2.tif:0012-1005	1.09	181.288	0	1114	22.378	102.956	0.987	197.625	18854	1.182	0.846	0.95	1.03866
162	IFT88_KAN487-3_3.tif:0001-0044	0.86	100.183	0	411	119.515	4.509	0.983	86.108	8215	1.084	0.923	0.927	0.45256
163	IFT88_KAN487-3_3.tif:0002-0262	0.744	204.155	0	811	128.408	26.881	0.864	151.935	14495	1.149	0.87	0.887	0.798523
164	IFT88_KAN487-3_3.tif:0003-0315	0.922	261.545	0	1201	91.281	32.234	0.728	241.25	23016	2.029	0.493	0.85	1.26794
165	IFT88_KAN487-3_3.tif:0004-0509	1.038	169.081	0	751	42.335	52.136	0.971	175.456	16739	1.055	0.948	0.934	0.922143
166	IFT88_KAN487-3_3.tif:0005-0609	0.964	204.62	0	1238	69.855	62.398	0.945	197.321	18825	1.078	0.928	0.939	1.03706
167	IFT88_KAN487-3_3.tif:0006-0614	1.027	250.48	0	1459	99.476	62.906	0.993	257.298	24547	1.059	0.944	0.938	1.35228
168	IFT88_KAN487-3_3.tif:0007-0760	0.943	99.878	0	850	52.818	77.905	0.895	94.221	8989	1.143	0.875	0.914	0.4952
169	IFT88_KAN487-3_3.tif:0008-0860	1.3	200.218	0	1236	78.673	88.003	0.917	260.233	24827	1.358	0.736	0.925	1.36771
170	IFT88_KAN487-3_3.tif:0009-0944	0.943	158.6	0	652	20.077	96.673	0.99	149.618	14274	1.113	0.899	0.938	0.786348
171	IFT88_KAN487-3_3.tif:0010-1018	1.478	318.759	0	1348	118.409	104.309	0.824	471.107	44945	1.343	0.745	0.895	2.476
172	IFT88_KAN487-3_4.tif:0001-0033	0.964	60.837	0	286	124.086	3.396	0.902	58.667	5597	1.361	0.735	0.915	0.308336
173	IFT88_KAN487-3_4.tif:0002-0075	0.818	271.872	0	1108	29.173	7.68	0.915	222.278	21206	1.34	0.746	0.951	1.16823
174	IFT88_KAN487-3_4.tif:0003-0158	1.3	197.669	0	1447	5.974	16.142	0.917	256.921	24511	1.226	0.816	0.922	1.3503
175	IFT88_KAN487-3_4.tif:0004-0224	0.943	165.056	0	777	102.127	22.947	0.882	155.708	14855	1.328	0.753	0.891	0.818355
176	IFT88_KAN487-3_4.tif:0005-0334	0.818	36.667	0	252	27.39	34.256	0.984	29.978	2860	1.137	0.879	0.951	0.157556
177	IFT88_KAN487-3_4.tif:0006-0457	1.457	224.237	0	1246	112.011	46.764	0.901	326.709	31169	1.265	0.791	0.924	1.71709
178	IFT88_KAN487-3_4.tif:0007-0616	1.153	207.555	0	1368	56.741	63.091	0.91	239.311	22831	1.367	0.731	0.928	1.25775
179	IFT88_KAN487-3_4.tif:0008-0670	1.268	274.769	0	1784	43.025	68.696	0.895	348.49	33247	1.354	0.739	0.924	1.83156
180	IFT88_KAN487-3_4.tif:0009-0679	1.446	198.877	0	1293	116.671	69.628	0.827	287.675	27445	1.418	0.705	0.893	1.51193
181	IFT88_KAN487-3_4.tif:0010-0811	1.216	125.759	0	460	105.299	83.031	0.96	152.909	14588	1.085	0.922	0.951	0.803646
182	IFT88_KAN487-3_4.tif:0011-0818	0.901	66.744	0	221	67.857	83.825	0.946	60.166	5740	1.189	0.841	0.91	0.316214
183	IFT88_KAN487-3_4.tif:0012-0839	1.048	185.4	0	1081	26.953	85.866	0.88	194.334	18540	1.337	0.748	0.893	1.02136
184	IFT88_KAN487-3_4.tif:0013-0987	0.891	124.565	0	558	3.132	101.047	0.949	110.982	10588	1.102	0.908	0.934	0.583288
185	IFT88_KAN487-3_4.tif:0014-0996	0.985	119.149	0	437	44.036	102.052	0.966	117.397	11200	1.148	0.871	0.945	0.617003
186	IFT88_KAN487-3_4.tif:0015-1000	1.646	319.089	0	1761	125.727	102.461	0.788	525.11	50097	1.399	0.715	0.867	2.75982
187	IFT88_KAN487-3_5.tif:0001-0050	1.268	248.025	0	1668	56.273	5.133	0.948	314.571	30011	1.154	0.866	0.927	1.65329
188	IFT88_KAN487-3_5.tif:0002-0130	1.467	490.643	0	3234	140.814	13.341	0.893	719.999	68690	1.274	0.785	0.94	3.7841
189	IFT88_KAN487-3_5.tif:0003-0217	0.87	265.807	0	1017	83.283	22.216	0.959	231.251	22062	1.037	0.965	0.938	1.21538
190	IFT88_KAN487-3_5.tif:0004-0292	0.755	230.333	0	844	82.562	29.945	0.909	173.831	16584	1.237	0.808	0.923	0.913605
191	IFT88_KAN487-3_5.tif:0005-0315	1.153	180.618	0	1259	22.644	32.21	0.926	208.254	19868	1.011	0.989	0.905	1.09452
192	IFT88_KAN487-3_5.tif:0006-0395	1.027	163.622	0	992	116.021	40.489	0.901	168.077	16035	1.463	0.683	0.929	0.88336
193	IFT88_KAN487-3_5.tif:0007-0512	1.289	423.431	0	2106	32.054	52.519	0.793	545.916	52082	1.784	0.56	0.935	2.86917
194	IFT88_KAN487-3_5.tif:0008-0520	1.101	103.867	0	435	118.669	53.283	0.912	114.315	10906	1.162	0.861	0.909	0.600806
195	IFT88_KAN487-3_5.tif:0009-0574	1.216	159.586	0	933	77.047	58.75	0.965	194.04	18512	1.211	0.826	0.928	1.01982
196	IFT88_KAN487-3_5.tif:0010-0641	0.849	88.531	0	340	54.24	65.684	0.923	75.165	7171	1.608	0.622	0.915	0.395047
197	IFT88_KAN487-3_5.tif:0011-0742	1.426	169.287	0	1214	129.472	75.907	0.827	241.324	23023	1.146	0.873	0.863	1.26833
198	IFT88_KAN487-3_5.tif:0012-0747	1.216	185.19	0	1138	82.44	76.533	0.858	225.171	21482	1.551	0.645	0.906	1.18343
199	IFT88_KAN487-3_5.tif:0013-0783	0.985	109.096	0	391	51.01	80.219	0.922	107.491	10255	1.145	0.873	0.908	0.564943
200	IFT88_KAN487-3_5.tif:0014-0900	1.258	258.6	0	1531	6.025	92.17	0.925	325.273	31032	1.041	0.96	0.927	1.70954
201	IFT88_KAN487-3_5.tif:0015-0928	1.195	216.193	0	932	44.502	95.042	0.893	258.336	24646	1.443	0.693	0.905	1.35774
202	IFT88_KAN487-3_5.tif:0016-0950	0.996	95.758	0	468	124.392	97.241	0.902	95.353	9097	1.189	0.841	0.896	0.501149
203	IFT88_KAN487-3_5.tif:0017-1001	1.436	255.146	0	1853	110.028	102.531	0.864	366.393	34955	1.2	0.833	0.895	1.92565
204	IFT88_KAN487-3_6.tif:0001-0069	0.818	119.449	0	523	0.923	7.129	0.984	97.659	9317	1.115	0.897	0.945	0.513269
205	IFT88_KAN487-3_6.tif:0002-0093	1.216	160.284	0	1083	86.12	9.504	0.894	194.889	18593	1.146	0.872	0.928	1.02428
206	IFT88_KAN487-3_6.tif:0003-0108	1.226	265.188	0	1331	118.054	11.04	0.901	325.221	31027	1.511	0.662	0.947	1.70926
207	IFT88_KAN487-3_6.tif:0004-0181	1.143	248.908	0	1261	46.498	18.529	0.942	284.383	27131	1.2	0.833	0.96	1.49463
208	IFT88_KAN487-3_6.tif:0005-0201	1.321	254.944	0	1394	58.235	20.544	0.921	336.709	32123	1.218	0.821	0.91	1.76964
209	IFT88_KAN487-3_6.tif:0006-0382	0.943	221.2	0	897	88.626	39.11	0.938	208.673	19908	1.053	0.95	0.957	1.09672
210	IFT88_KAN487-3_6.tif:0007-0397	0.954	265.527	0	1297	24.644	40.658	0.967	253.273	24163	1.113	0.898	0.933	1.33113
211	IFT88_KAN487-3_6.tif:0008-0434	1.205	184.191	0	1177	71.718	44.486	0.876	222.027	21182	1.331	0.751	0.909	1.16691
212	IFT88_KAN487-3_6.tif:0009-0565	0.818	177.949	0	990	114.276	57.791	0.902	145.488	13880	1.157	0.864	0.902	0.764642
213	IFT88_KAN487-3_6.tif:0010-0662	1.101	91.886	0	449	11.957	67.741	0.953	101.129	9648	1.232	0.812	0.933	0.531504
214	IFT88_KAN487-3_6.tif:0011-0775	1.446	153.899	0	1102	46.166	79.33	0.884	222.614	21238	1.238	0.808	0.89	1.16999
215	IFT88_KAN487-3_6.tif:0012-0789	1.3	199.379	0	1085	79.299	80.727	0.917	259.143	24723	1.326	0.754	0.936	1.36198
216	IFT88_KAN487-3_6.tif:0013-0804	1.331	153.11	0	877	130.045	82.361	0.868	203.82	19445	1.394	0.717	0.898	1.07122
217	IFT88_KAN487-3_6.tif:0014-0871	1.289	107.789	0	615	97.152	89.186	0.818	138.968	13258	1.605	0.623	0.895	0.730377
218	IFT88_KAN487-3_6.tif:0015-0904	1.247	265.571	0	1570	125.398	92.611	0.944	331.258	31603	1.052	0.951	0.937	1.74099
219	IFT88_KAN487-3_6.tif:0016-1026	1.132	167.528	0	939	23.359	105.051	0.905	189.648	18093	1.236	0.809	0.956	0.996735
										19993.3				1.10142
	NCS1 KO
220	IFT88_KAN487-4_1.tif:0001-0252	1.174	32.884	0	442	84.588	25.792	0.889	38.605	3683	1.538	0.65	0.929	0.202895
221	IFT88_KAN487-4_1.tif:0002-0269	1.446	138.978	0	622	122.724	27.546	0.839	201.032	19179	1.62	0.617	0.887	1.05656
222	IFT88_KAN487-4_1.tif:0003-0324	1.174	91.536	0	761	54.507	33.225	0.889	107.46	10252	1.478	0.677	0.922	0.564778
223	IFT88_KAN487-4_1.tif:0004-0357	1.163	208.207	0	1215	100.417	36.682	0.831	242.246	23111	1.592	0.628	0.933	1.27317
224	IFT88_KAN487-4_1.tif:0005-0530	1.153	154.218	0	940	58.528	54.255	0.915	177.814	16964	1.395	0.717	0.894	0.934539
225	IFT88_KAN487-4_1.tif:0006-0539	1.174	117.321	0	628	81.337	55.171	0.904	137.732	13140	1.305	0.766	0.907	0.723876
226	IFT88_KAN487-4_1.tif:0007-0565	0.755	134.403	0	415	12.078	57.844	0.958	101.433	9677	1.239	0.807	0.954	0.533101
227	IFT88_KAN487-4_1.tif:0008-0672	1.09	173.385	0	898	43.932	68.893	0.915	189.009	18032	1.249	0.801	0.929	0.993374
228	IFT88_KAN487-4_1.tif:0009-0830	1.184	347.779	0	1805	126.898	85.003	0.935	411.927	39299	1.201	0.833	0.942	2.16496
229	IFT88_KAN487-4_1.tif:0010-0933	1.184	196.558	0	1067	77.935	95.555	0.923	232.813	22211	1.143	0.875	0.915	1.22359
230	IFT88_KAN487-4_2.tif:0001-0034	1.31	212.168	0	1161	35.901	3.537	0.819	277.989	26521	1.251	0.799	0.883	1.46103
231	IFT88_KAN487-4_2.tif:0002-0183	1.184	216.77	0	1233	119.031	18.765	0.846	256.753	24495	1.449	0.69	0.922	1.34942
232	IFT88_KAN487-4_2.tif:0003-0219	0.901	153.907	0	924	91.273	22.421	0.974	138.738	13236	1.11	0.901	0.977	0.729165
233	IFT88_KAN487-4_2.tif:0004-0286	0.713	31.941	0	265	71.204	29.319	0.905	22.767	2172	1.072	0.933	0.919	0.119654
234	IFT88_KAN487-4_2.tif:0005-0419	0.86	131.171	4	408	135.08	42.97	0.983	112.743	10756	1.24	0.807	0.937	0.592543
235	IFT88_KAN487-4_2.tif:0006-0431	1.174	185.509	0	966	7.353	44.073	0.878	217.782	20777	1.632	0.613	0.918	1.14459
236	IFT88_KAN487-4_2.tif:0007-0459	0.88	236.548	0	996	56.568	47.046	0.906	208.275	19870	1.307	0.765	0.923	1.09463
237	IFT88_KAN487-4_2.tif:0008-0594	1.101	237.448	0	1166	67.181	60.789	1	261.334	24932	1.083	0.924	0.938	1.37349
238	IFT88_KAN487-4_2.tif:0009-0778	1.279	254.385	0	1614	103.864	79.714	0.956	325.304	31035	1.071	0.934	0.928	1.7097
239	IFT88_KAN487-4_2.tif:0010-0788	1.038	213.616	0	1239	43.658	80.707	0.94	221.67	21148	1.426	0.701	0.943	1.16503
240	IFT88_KAN487-4_2.tif:0011-0914	1.143	195.697	0	1245	126.288	93.515	0.865	223.589	21331	1.408	0.71	0.912	1.17511
241	IFT88_KAN487-4_2.tif:0012-0949	1.122	182.654	0	758	81.727	97.211	0.941	204.857	19544	1.141	0.876	0.922	1.07667
242	IFT88_KAN487-4_2.tif:0013-0962	1.247	318.723	0	2039	113.154	98.464	0.902	397.556	37928	1.207	0.828	0.96	2.08944
243	IFT88_KAN487-4_2.tif:0014-0967	1.163	243.045	0	1421	22.247	99.036	0.896	282.78	26978	1.104	0.905	0.871	1.4862
244	IFT88_KAN487-4_2.tif:0015-1033	0.818	141.179	0	1331	64.97	105.812	0.87	115.426	11012	1.48	0.676	0.923	0.606646
245	IFT88_KAN487-4_3.tif:0001-0026	0.912	208.828	0	1090	138.056	2.792	0.81	190.434	18168	1.282	0.78	0.902	1.00087
246	IFT88_KAN487-4_3.tif:0002-0149	0.912	143.839	0	878	29.453	15.247	0.971	131.17	12514	1.036	0.965	0.941	0.68939
247	IFT88_KAN487-4_3.tif:0003-0162	1.184	133.602	0	918	71.861	16.631	0.886	158.245	15097	1.353	0.739	0.89	0.831686
248	IFT88_KAN487-4_3.tif:0004-0232	0.933	102.169	0	694	128.919	23.746	0.959	95.312	9093	1.025	0.976	0.952	0.500929
249	IFT88_KAN487-4_3.tif:0005-0493	0.975	83.71	0	650	37.539	50.553	0.883	81.601	7785	1.126	0.888	0.903	0.428872
250	IFT88_KAN487-4_3.tif:0006-0521	0.901	46.733	0	167	122.87	53.34	0.901	42.127	4019	1.622	0.616	0.905	0.221405
251	IFT88_KAN487-4_3.tif:0007-0708	1.122	189.561	0	1177	46.104	72.437	0.901	212.604	20283	1.383	0.723	0.903	1.11738
252	IFT88_KAN487-4_3.tif:0008-0754	1.426	214.596	0	1403	115.144	77.182	0.915	305.913	29185	1.2	0.833	0.925	1.60779
253	IFT88_KAN487-4_3.tif:0009-0795	1.006	77.979	0	667	84.235	81.383	0.844	78.467	7486	1.464	0.683	0.897	0.4124
254	IFT88_KAN487-4_3.tif:0010-1017	0.954	55.868	0	197	46.255	104.186	0.922	53.29	5084	1.212	0.825	0.901	0.280075
255	IFT88_KAN487-4_4.tif:0001-0134	1.415	217.659	0	1518	61.24	13.695	0.83	307.999	29384	1.351	0.74	0.903	1.61875
256	IFT88_KAN487-4_4.tif:0002-0152	0.985	212.138	0	874	99.284	15.652	0.934	209.019	19941	1.357	0.737	0.949	1.09854
257	IFT88_KAN487-4_4.tif:0003-0306	1.226	152.154	0	1226	125.668	31.377	0.866	186.598	17802	1.284	0.779	0.89	0.980704
258	IFT88_KAN487-4_4.tif:0004-0517	0.86	69.524	0	677	6.495	52.94	0.884	59.757	5701	1.102	0.907	0.916	0.314065
259	IFT88_KAN487-4_4.tif:0005-0543	1.384	257.379	0	1803	25.197	55.637	0.811	356.111	33974	1.837	0.544	0.91	1.87161
260	IFT88_KAN487-4_4.tif:0006-0573	0.744	173.887	0	734	41.328	58.646	0.91	129.409	12346	1.214	0.824	0.959	0.680135
261	IFT88_KAN487-4_4.tif:0007-0602	1.289	152.033	0	811	81.025	61.695	0.874	196.011	18700	1.104	0.906	0.882	1.03017
262	IFT88_KAN487-4_4.tif:0008-0600	0.912	388.563	0	1775	118.671	61.436	0.877	354.339	33805	1.298	0.77	0.951	1.8623
263	IFT88_KAN487-4_4.tif:0009-0812	0.975	89.312	0	324	1.182	83.149	0.943	87.062	8306	1.285	0.778	0.935	0.457574
264	IFT88_KAN487-4_4.tif:0010-0886	1.08	149.718	0	735	116.633	90.751	0.918	161.641	15421	1.445	0.692	0.945	0.849535
265	IFT88_KAN487-4_4.tif:0011-0914	1.31	178.648	0	1177	78.16	93.536	0.952	234.07	22331	1.121	0.892	0.933	1.2302
266	IFT88_KAN487-4_4.tif:0012-1015	1.153	195.809	0	1132	27.252	103.963	0.91	225.769	21539	1.27	0.787	0.94	1.18657
267	IFT88_KAN487-4_5.tif:0001-0022	0.692	125.394	0	474	12.109	2.336	0.988	86.748	8276	1.113	0.899	0.923	0.455921
268	IFT88_KAN487-4_5.tif:0002-0126	1.279	198.992	0	1270	76.373	12.956	0.903	254.468	24277	1.403	0.713	0.924	1.33741
269	IFT88_KAN487-4_5.tif:0003-0156	1.216	299.845	0	1827	118.237	15.942	0.834	364.58	34782	1.614	0.62	0.913	1.91612
270	IFT88_KAN487-4_5.tif:0004-0253	1.017	181.031	0	871	14.572	25.928	0.904	184.061	17560	1.342	0.745	0.956	0.967372
271	IFT88_KAN487-4_5.tif:0005-0273	1.09	182.423	0	940	103.365	27.974	0.815	198.862	18972	1.332	0.751	0.849	1.04516
272	IFT88_KAN487-4_5.tif:0006-0286	0.975	188.226	0	989	54.965	29.339	0.956	183.485	17505	1.083	0.923	0.93	0.964342
273	IFT88_KAN487-4_5.tif:0007-0296	1.31	109.432	0	704	65.926	30.284	0.81	143.381	13679	1.749	0.572	0.896	0.753569
274	IFT88_KAN487-4_5.tif:0008-0488	1.132	266.741	0	1431	119.911	49.986	0.867	301.961	28808	1.376	0.727	0.939	1.58702
275	IFT88_KAN487-4_5.tif:0009-0658	1.163	182.306	0	1005	44.855	67.392	0.935	212.111	20236	1.231	0.812	0.917	1.11479
276	IFT88_KAN487-4_5.tif:0010-0668	0.776	180.473	0	650	2.894	68.421	0.969	139.985	13355	1.099	0.91	0.931	0.73572
277	IFT88_KAN487-4_5.tif:0011-0715	1.352	289.264	0	1432	98.554	73.216	0.845	391.131	37315	1.55	0.645	0.928	2.05567
278	IFT88_KAN487-4_5.tif:0012-0864	1.331	205.835	0	1231	118.576	88.415	0.903	274.006	26141	1.251	0.799	0.907	1.4401
279	IFT88_KAN487-4_5.tif:0013-0966	1.478	152.39	0	1223	72.09	98.823	0.815	225.224	21487	1.398	0.715	0.898	1.18371
280	IFT88_KAN487-4_5.tif:0014-0991	0.985	117	0	615	49.834	101.45	0.922	115.279	10998	1.221	0.819	0.908	0.605874
281	IFT88_KAN487-4_6.tif:0001-0136	1.143	160.862	0	1053	123.713	13.976	0.784	183.789	17534	1.842	0.543	0.901	0.96594
282	IFT88_KAN487-4_6.tif:0002-0164	1.038	266.273	0	1159	20.671	16.781	0.855	276.312	26361	1.276	0.784	0.917	1.45221
283	IFT88_KAN487-4_6.tif:0003-0202	0.954	256.538	0	1201	62.163	20.742	0.967	244.699	23345	1.306	0.765	0.938	1.28606
284	IFT88_KAN487-4_6.tif:0004-0294	1.195	220.009	0	1149	29.417	30.157	0.82	262.896	25081	1.26	0.794	0.887	1.3817
285	IFT88_KAN487-4_6.tif:0005-0359	1.426	192.39	0	1091	138.847	36.764	0.881	274.258	26165	1.262	0.792	0.901	1.44142
286	IFT88_KAN487-4_6.tif:0006-0525	1.247	208.714	0	1133	76.64	53.825	0.917	260.338	24837	1.198	0.835	0.93	1.36826
287	IFT88_KAN487-4_6.tif:0007-0548	1.059	196.218	0	1167	107.127	56.139	0.788	207.729	19818	1.765	0.567	0.91	1.09176
288	IFT88_KAN487-4_6.tif:0008-0562	1.205	175.313	0	1032	9.152	57.55	0.94	211.325	20161	1.236	0.809	0.935	1.11066
289	IFT88_KAN487-4_6.tif:0009-0590	1.698	240.13	0	1196	44.325	60.359	0.824	407.755	38901	1.093	0.915	0.866	2.14304
290	IFT88_KAN487-4_6.tif:0010-0607	0.901	122.849	0	496	138.654	62.186	0.994	110.741	10565	1.291	0.775	0.95	0.582021
291	IFT88_KAN487-4_6.tif:0011-0816	0.755	40.542	0	198	9.611	83.591	0.909	30.597	2919	1.276	0.784	0.9	0.160806
292	IFT88_KAN487-4_6.tif:0012-0901	1.446	141.536	0	1168	68.011	92.302	0.839	204.732	19532	1.607	0.622	0.911	1.07601
293	IFT88_KAN487-4_6.tif:0013-0996	1.352	185.651	0	1596	132.221	101.992	0.917	251.03	23949	1.078	0.928	0.908	1.31934
294	IFT88_KAN487-4_6.tif:0014-1001	1.268	190.694	0	1105	29.363	102.551	0.921	241.858	23074	1.371	0.729	0.924	1.27114
										19345.1				1.06571
	RAB34 KO
295	IFT88_KAN487-5_1.tif:0001-0020	1.499	200.832	0	1030	137.206	2.155	0.827	301.029	28719	1.733	0.577	0.935	1.58212
296	IFT88_KAN487-5_1.tif:0002-0131	0.964	237.087	0	1292	39.919	13.402	0.873	228.63	21812	1.536	0.651	0.911	1.20161
297	IFT88_KAN487-5_1.tif:0003-0332	1.006	155.344	0	566	96.984	34.029	0.973	156.316	14913	1.026	0.975	0.928	0.82155
298	IFT88_KAN487-5_1.tif:0004-0461	1.08	159.874	0	919	35.747	47.171	0.89	172.605	16467	1.26	0.794	0.936	0.907159
299	IFT88_KAN487-5_1.tif:0005-0519	0.912	145.828	0	693	79.387	53.218	0.882	132.983	12687	1.502	0.666	0.892	0.698921
300	IFT88_KAN487-5_1.tif:0006-0525	1.059	202.149	0	784	125.557	53.843	0.9	214.008	20417	1.435	0.697	0.94	1.12476
301	IFT88_KAN487-5_1.tif:0007-0616	1.247	198.992	0	1331	91.396	63.143	0.933	248.21	23680	1.293	0.773	0.915	1.30452
302	IFT88_KAN487-5_1.tif:0008-0615	0.828	135.367	0	874	57.606	63.034	0.947	112.093	10694	1.289	0.776	0.913	0.589127
303	IFT88_KAN487-5_1.tif:0009-0721	0.996	132.905	0	661	18.439	73.827	0.902	132.344	12626	1.22	0.82	0.909	0.69556
304	IFT88_KAN487-5_1.tif:0010-0727	1.048	266.22	0	1283	36.879	74.4	0.891	279.048	26622	1.193	0.838	0.93	1.46659
305	IFT88_KAN487-5_1.tif:0011-0815	0.933	176.607	0	1013	11.448	83.472	0.993	164.754	15718	1.105	0.905	0.957	0.865897
306	IFT88_KAN487-5_1.tif:0012-0932	0.954	228.901	0	841	90.658	95.404	0.935	218.337	20830	1.138	0.879	0.924	1.14751
307	IFT88_KAN487-5_2.tif:0001-0022	0.744	55.451	0	188	30.23	2.295	0.93	41.267	3937	1.383	0.723	0.922	0.216887
308	IFT88_KAN487-5_2.tif:0002-0035	1.006	213.083	0	1021	52.761	3.583	0.911	214.417	20456	1.384	0.722	0.923	1.12691
309	IFT88_KAN487-5_2.tif:0003-0069	1.174	167.375	0	1092	97.673	7.084	0.927	196.493	18746	1.112	0.899	0.945	1.03271
310	IFT88_KAN487-5_2.tif:0004-0250	1.038	151.293	0	796	1.42	25.583	0.94	156.997	14978	1.161	0.861	0.93	0.825131
311	IFT88_KAN487-5_2.tif:0005-0322	1.174	125.393	0	782	34.89	33.005	0.927	147.207	14044	1.066	0.938	0.941	0.773677
312	IFT88_KAN487-5_2.tif:0006-0402	1.111	159.821	0	920	33.563	41.172	0.893	177.573	16941	1.407	0.711	0.91	0.933271
313	IFT88_KAN487-5_2.tif:0007-0424	0.964	99.848	0	341	61.817	43.402	0.945	96.286	9186	1.348	0.742	0.948	0.506052
314	IFT88_KAN487-5_2.tif:0008-0435	1.258	173.533	0	1104	107.84	44.578	0.969	218.274	20824	1.191	0.839	0.92	1.14718
315	IFT88_KAN487-5_2.tif:0009-0467	1.069	148.412	0	822	71.934	47.795	0.938	158.674	15138	1.246	0.803	0.949	0.833945
316	IFT88_KAN487-5_2.tif:0010-0663	1.132	179.991	0	887	88.415	67.892	0.921	203.757	19439	1.318	0.759	0.931	1.07089
317	IFT88_KAN487-5_2.tif:0011-0679	0.912	159.563	0	811	54.102	69.583	0.971	145.509	13882	1.265	0.79	0.946	0.764753
318	IFT88_KAN487-5_2.tif:0012-0735	0.88	165.667	0	550	29.848	75.226	0.992	145.866	13916	1.226	0.816	0.923	0.766626
319	IFT88_KAN487-5_2.tif:0013-0795	0.985	245.489	0	1217	66.213	81.452	0.999	241.879	23076	1.14	0.877	0.945	1.27125
320	IFT88_KAN487-5_2.tif:0014-0905	1.457	176.827	0	1047	131.18	92.632	0.854	257.634	24579	1.085	0.921	0.9	1.35405
321	IFT88_KAN487-5_2.tif:0015-0942	1.3	255.855	0	1548	113.03	96.44	0.955	332.547	31726	1.231	0.812	0.95	1.74777
322	IFT88_KAN487-5_2.tif:0016-0972	0.985	223.415	0	1230	49.64	99.509	0.934	220.13	21001	1.183	0.845	0.945	1.15693
323	IFT88_KAN487-5_3.tif:0001-0114	1.174	351.214	0	1398	64.595	11.698	0.889	412.314	39336	1.438	0.695	0.918	2.167
324	IFT88_KAN487-5_3.tif:0002-0153	1.122	181.346	0	1040	21.595	15.674	0.913	203.39	19404	1.207	0.829	0.926	1.06896
325	IFT88_KAN487-5_3.tif:0003-0301	0.985	169.128	0	772	55.168	30.813	0.934	166.641	15898	1.223	0.818	0.945	0.875813
326	IFT88_KAN487-5_3.tif:0004-0309	1.048	122.23	0	846	94.238	31.651	0.937	128.12	12223	1.297	0.771	0.913	0.673359
327	IFT88_KAN487-5_3.tif:0005-0316	1.027	176.224	0	988	131.593	32.336	0.93	181.022	17270	1.225	0.816	0.933	0.951396
328	IFT88_KAN487-5_3.tif:0006-0336	1.08	133.204	0	470	12.107	34.484	0.978	143.811	13720	1.015	0.986	0.941	0.755828
329	IFT88_KAN487-5_3.tif:0007-0525	1.09	205.76	0	1233	116.021	53.739	0.927	224.301	21399	1.252	0.799	0.945	1.17886
330	IFT88_KAN487-5_3.tif:0008-0623	1.048	275.54	0	1614	61.191	63.807	0.949	288.817	27554	1.034	0.967	0.935	1.51794
331	IFT88_KAN487-5_3.tif:0009-0685	1.352	151.581	0	1019	132.51	70.065	0.836	204.962	19554	1.256	0.796	0.881	1.07722
332	IFT88_KAN487-5_3.tif:0010-0751	1.027	218.122	0	1200	53.503	76.964	0.885	224.06	21376	1.293	0.773	0.966	1.17759
333	IFT88_KAN487-5_3.tif:0011-0756	0.88	173.881	0	792	22.324	77.438	0.924	153.098	14606	1.191	0.84	0.903	0.804637
334	IFT88_KAN487-5_3.tif:0012-0853	1.122	208.953	0	1030	82.072	87.392	0.941	234.353	22358	1.061	0.942	0.926	1.23169
335	IFT88_KAN487-5_3.tif:0013-0908	1.059	106.248	0	406	15.911	92.96	0.888	112.481	10731	1.389	0.72	0.914	0.591166
336	IFT88_KAN487-5_3.tif:0014-0937	1.237	155.797	0	699	63.039	96.012	0.925	192.698	18384	1.382	0.723	0.922	1.01277
337	IFT88_KAN487-5_4.tif:0001-0133	1.184	120.894	0	736	95.895	13.639	0.896	143.193	13661	1.355	0.738	0.915	0.752578
338	IFT88_KAN487-5_4.tif:0002-0140	1.184	195.062	0	1166	32.172	14.327	0.981	231.041	22042	1.093	0.915	0.922	1.21428
339	IFT88_KAN487-5_4.tif:0003-0162	1.363	218.577	0	1423	60.065	16.612	0.875	297.842	28415	1.454	0.688	0.929	1.56537
340	IFT88_KAN487-5_4.tif:0004-0239	1.184	179.142	0	888	17.492	24.483	0.896	212.184	20243	1.33	0.752	0.93	1.11518
341	IFT88_KAN487-5_4.tif:0005-0366	0.964	120.717	0	724	68.794	37.513	0.945	116.412	11106	1.08	0.926	0.934	0.611824
342	IFT88_KAN487-5_4.tif:0006-0434	1.111	105.472	0	334	30.003	44.487	0.932	117.187	11180	1.338	0.747	0.93	0.615901
343	IFT88_KAN487-5_4.tif:0007-0606	0.912	285.391	0	1491	76.672	62.043	0.938	260.254	24829	1.032	0.969	0.941	1.36782
344	IFT88_KAN487-5_4.tif:0008-0634	1.195	144.254	0	642	138.758	64.936	0.893	172.374	16445	1.309	0.764	0.901	0.905947
345	IFT88_KAN487-5_4.tif:0009-0667	1.268	64.562	0	428	11.147	68.369	0.837	81.884	7812	1.461	0.685	0.89	0.430359
346	IFT88_KAN487-5_4.tif:0010-0781	1.153	235.673	0	1504	110.914	80	0.873	271.732	25924	1.448	0.691	0.917	1.42814
347	IFT88_KAN487-5_4.tif:0011-0813	1.205	165.296	0	1033	65.9	83.206	0.901	199.25	19009	1.41	0.709	0.916	1.0472
348	IFT88_KAN487-5_4.tif:0012-0851	0.765	193.973	0	754	46.766	87.141	0.888	148.423	14160	1.292	0.774	0.907	0.780068
349	IFT88_KAN487-5_5.tif:0001-0063	0.996	225.263	0	1020	65.601	6.455	0.932	224.312	21400	1.13	0.885	0.905	1.17892
350	IFT88_KAN487-5_5.tif:0002-0076	0.933	61.371	0	175	119.217	7.839	0.915	57.252	5462	1.169	0.855	0.932	0.300899
351	IFT88_KAN487-5_5.tif:0003-0256	1.09	197.942	0	849	34.442	26.214	0.974	215.78	20586	1.14	0.878	0.933	1.13407
352	IFT88_KAN487-5_5.tif:0004-0271	1.226	117.12	0	905	117.427	27.726	0.928	143.633	13703	1.409	0.71	0.944	0.754892
353	IFT88_KAN487-5_5.tif:0005-0346	1.122	145.15	0	626	96.849	35.462	0.901	162.794	15531	1.27	0.787	0.911	0.855595
354	IFT88_KAN487-5_5.tif:0006-0426	1.017	107.474	0	509	5.26	43.655	0.951	109.273	10425	1.075	0.93	0.915	0.574308
355	IFT88_KAN487-5_5.tif:0007-0483	1.153	109.945	0	629	62.264	49.509	0.899	126.768	12094	1.364	0.733	0.924	0.666253
356	IFT88_KAN487-5_5.tif:0008-0656	1.216	167.819	0	1221	42.98	67.175	0.894	204.05	19467	1.174	0.852	0.917	1.07243
357	IFT88_KAN487-5_5.tif:0009-0664	1.132	175.602	0	966	70.543	68.053	0.921	198.788	18965	1.145	0.873	0.919	1.04477
358	IFT88_KAN487-5_5.tif:0010-0775	1.132	156.278	0	550	130.552	79.378	0.95	176.913	16878	1.124	0.89	0.931	0.929801
359	IFT88_KAN487-5_5.tif:0011-0850	1.226	170.786	0	1029	117.879	87.03	0.956	209.449	19982	1.143	0.875	0.932	1.1008
360	IFT88_KAN487-5_5.tif:0012-0894	1.017	98.969	0	408	54.379	91.583	0.964	100.626	9600	1.336	0.748	0.96	0.528859
361	IFT88_KAN487-5_5.tif:0013-0912	1.153	114.009	0	529	25.344	93.361	0.938	131.453	12541	1.141	0.876	0.936	0.690878
362	IFT88_KAN487-5_5.tif:0014-0946	0.964	188.957	0	1119	11.377	96.866	0.914	182.217	17384	1.185	0.844	0.934	0.957676
363	IFT88_KAN487-5_6.tif:0001-0089	1.247	9.16	0	84	101.716	9.145	0.949	11.425	1090	1.084	0.923	0.902	0.0600476
364	IFT88_KAN487-5_6.tif:0002-0216	1.184	118.912	0	559	44.398	22.099	0.964	140.845	13437	1.197	0.836	0.942	0.740238
365	IFT88_KAN487-5_6.tif:0003-0248	1.08	169.748	0	1024	109.141	25.406	0.918	183.265	17484	1.228	0.814	0.936	0.963185
366	IFT88_KAN487-5_6.tif:0004-0312	1.027	150.867	0	763	30.148	31.993	0.901	154.974	14785	1.434	0.697	0.938	0.814498
367	IFT88_KAN487-5_6.tif:0005-0399	1.436	214.007	0	968	128.21	40.879	0.784	307.318	29319	1.697	0.589	0.873	1.61517
368	IFT88_KAN487-5_6.tif:0006-0420	1.163	238.937	0	1062	98.728	42.972	0.881	278	26522	1.289	0.776	0.921	1.46108
369	IFT88_KAN487-5_6.tif:0007-0431	0.975	172.925	0	1144	74.98	44.107	0.956	168.569	16082	1.154	0.867	0.939	0.88595
370	IFT88_KAN487-5_6.tif:0008-0475	0.891	135.647	0	356	36.911	48.673	0.983	120.856	11530	1.202	0.832	0.944	0.635182
371	IFT88_KAN487-5_6.tif:0009-0516	0.692	220.136	0	888	5.873	52.846	0.988	152.291	14529	1.06	0.944	0.923	0.800396
372	IFT88_KAN487-5_6.tif:0010-0557	0.964	239	0	1163	103.701	57.095	0.978	230.475	21988	1.065	0.939	0.934	1.21131
373	IFT88_KAN487-5_6.tif:0011-0580	1.017	125.299	0	684	55.57	59.329	0.938	127.397	12154	1.209	0.827	0.898	0.669558
374	IFT88_KAN487-5_6.tif:0012-0676	1.111	295.396	0	1142	96.249	69.228	0.932	328.208	31312	1.305	0.767	0.93	1.72496
375	IFT88_KAN487-5_6.tif:0013-0733	0.975	204.57	0	884	30.927	75.12	0.988	199.417	19025	1.17	0.855	0.939	1.04808
376	IFT88_KAN487-5_6.tif:0014-0748	1.08	274	0	1323	137.439	76.618	0.978	295.819	28222	1.032	0.969	0.945	1.55474
										17892.6				0.985693
	MYO5A KO
377	IFT88_KAN487-6_1.tif:0001-0080	1.174	147.518	0	937	6.25	8.231	0.838	173.181	16522	1.437	0.696	0.9	0.910189
378	IFT88_KAN487-6_1.tif:0002-0130	0.975	329.763	0	1480	45.834	13.389	0.855	321.458	30668	1.432	0.698	0.912	1.68949
379	IFT88_KAN487-6_1.tif:0003-0131	0.901	216.233	0	921	130.852	13.395	0.927	194.921	18596	1.085	0.922	0.935	1.02444
380	IFT88_KAN487-6_1.tif:0004-0281	1.153	216.291	0	1076	96.069	28.797	0.858	249.384	23792	1.477	0.677	0.924	1.31069
381	IFT88_KAN487-6_1.tif:0005-0369	1.226	146.752	0	937	6.848	37.772	0.876	179.974	17170	1.369	0.73	0.936	0.945887
382	IFT88_KAN487-6_1.tif:0006-0451	1.143	150.651	0	1080	67.613	46.182	0.806	172.123	16421	1.641	0.609	0.879	0.904625
383	IFT88_KAN487-6_1.tif:0007-0459	1.069	162.441	0	740	31.216	46.989	0.955	173.674	16569	1.098	0.911	0.911	0.912778
384	IFT88_KAN487-6_1.tif:0008-0627	0.639	25.803	0	182	72.483	64.283	0.968	16.498	1574	1.185	0.844	0.946	0.0867109
385	IFT88_KAN487-6_1.tif:0009-0668	0.839	91.725	0	387	61.45	68.407	0.939	76.916	7338	1.136	0.88	0.952	0.404247
386	IFT88_KAN487-6_1.tif:0010-0816	1.111	329.387	0	1477	104.488	83.553	0.962	365.974	34915	1.361	0.735	0.942	1.92345
387	IFT88_KAN487-6_1.tif:0011-0874	1.069	205.216	0	1148	34.384	89.507	0.897	219.406	20932	1.369	0.73	0.915	1.15313
388	IFT88_KAN487-6_1.tif:0012-0972	1.226	157.846	0	1009	24.645	99.506	0.818	193.579	18468	1.525	0.656	0.903	1.01739
389	IFT88_KAN487-6_1.tif:0013-1008	0.996	116.316	0	299	90.754	103.21	0.914	115.825	11050	1.14	0.877	0.941	0.608739
390	IFT88_KAN487-6_2.tif:0001-0008	0.996	233.021	0	1288	53.758	0.833	0.857	232.037	22137	1.203	0.832	0.931	1.21952
391	IFT88_KAN487-6_2.tif:0002-0177	1.3	160.847	0	1031	24.26	18.164	0.812	209.061	19945	1.486	0.673	0.876	1.09876
392	IFT88_KAN487-6_2.tif:0003-0235	0.891	375.388	0	1631	98.822	24.053	0.935	334.455	31908	1.332	0.751	0.914	1.7578
393	IFT88_KAN487-6_2.tif:0004-0419	0.797	89.145	0	466	4.7	42.947	0.924	71.015	6775	1.39	0.719	0.944	0.373231
394	IFT88_KAN487-6_2.tif:0005-0480	1.446	270.058	0	1620	27.47	49.174	0.818	390.638	37268	1.5	0.667	0.896	2.05308
395	IFT88_KAN487-6_2.tif:0006-0506	0.786	419.067	0	1496	108.746	51.808	0.961	329.445	31430	1.262	0.793	0.974	1.73146
396	IFT88_KAN487-6_2.tif:0007-0588	1.09	160.673	0	716	19.145	60.194	0.887	175.152	16710	1.145	0.873	0.904	0.920546
397	IFT88_KAN487-6_2.tif:0008-0648	1.069	141.735	0	763	62.708	66.334	0.809	151.536	14457	1.684	0.594	0.879	0.796429
398	IFT88_KAN487-6_2.tif:0009-0855	1.122	121.131	0	574	75.812	87.564	0.958	135.855	12961	1.134	0.882	0.903	0.714015
399	IFT88_KAN487-6_2.tif:0010-0895	1.017	226.093	0	1210	103.686	91.644	0.921	229.878	21931	1.408	0.71	0.924	1.20817
400	IFT88_KAN487-6_2.tif:0011-0909	1.321	185.73	0	1263	122.383	93.031	0.871	245.296	23402	1.452	0.689	0.91	1.2892
401	IFT88_KAN487-6_3.tif:0001-0063	0.713	177.779	0	617	16.684	6.447	0.978	126.715	12089	1.318	0.759	0.932	0.665977
402	IFT88_KAN487-6_3.tif:0002-0069	1.363	140.308	0	1040	81.757	7.116	0.771	191.189	18240	1.765	0.567	0.864	1.00483
403	IFT88_KAN487-6_3.tif:0003-0418	0.922	184.705	0	809	87.781	42.795	0.935	170.372	16254	1.196	0.836	0.907	0.895425
404	IFT88_KAN487-6_3.tif:0004-0447	0.87	51.12	0	753	0.657	45.817	0.825	44.475	4243	1.598	0.626	0.922	0.233745
405	IFT88_KAN487-6_3.tif:0005-0531	0.755	48.653	0	211	42.144	54.418	0.958	36.718	3503	1.209	0.827	0.954	0.192979
406	IFT88_KAN487-6_3.tif:0006-0573	1.321	239.389	0	1964	132.305	58.68	0.848	316.164	30163	1.433	0.698	0.9	1.66167
407	IFT88_KAN487-6_3.tif:0007-0670	1.143	104.743	0	587	59.899	68.624	0.93	119.671	11417	1.312	0.762	0.936	0.628957
408	IFT88_KAN487-6_3.tif:0008-0764	0.933	72.989	0	320	129.544	78.23	0.927	68.09	6496	1.207	0.829	0.962	0.357861
409	IFT88_KAN487-6_3.tif:0009-0828	1.027	157.378	0	1047	26.036	84.731	0.901	161.662	15423	1.326	0.754	0.925	0.849646
410	IFT88_KAN487-6_3.tif:0010-0997	1.352	177.651	0	1184	24.789	102.146	0.773	240.213	22917	1.64	0.61	0.878	1.26249
411	IFT88_KAN487-6_4.tif:0001-0062	1.143	205.936	0	1103	127.567	6.375	0.85	235.286	22447	1.557	0.642	0.932	1.23659
412	IFT88_KAN487-6_4.tif:0002-0274	0.86	173.427	0	972	90.867	28.061	0.934	149.063	14221	1.169	0.856	0.891	0.783428
413	IFT88_KAN487-6_4.tif:0003-0307	1.027	106.898	0	641	39.335	31.452	0.901	109.808	10476	1.149	0.87	0.925	0.577118
414	IFT88_KAN487-6_4.tif:0004-0353	0.786	256.613	0	1081	124.77	36.125	0.899	201.734	19246	1.373	0.728	0.904	1.06025
415	IFT88_KAN487-6_4.tif:0005-0537	1.174	248.286	0	1595	111.588	55.044	0.955	291.48	27808	1.156	0.865	0.941	1.53193
416	IFT88_KAN487-6_4.tif:0006-0576	1.373	185.634	0	1276	91.711	58.959	0.906	254.898	24318	1.386	0.721	0.929	1.33967
417	IFT88_KAN487-6_4.tif:0007-0650	1.205	235.113	0	1425	53.45	66.586	0.912	283.409	27038	1.521	0.657	0.939	1.48951
418	IFT88_KAN487-6_4.tif:0008-0658	1.059	165.723	0	908	7.366	67.326	0.851	175.445	16738	1.437	0.696	0.886	0.922088
419	IFT88_KAN487-6_4.tif:0009-0749	1.027	214.031	0	1020	20.653	76.742	0.993	219.857	20975	1.011	0.989	0.92	1.1555
420	IFT88_KAN487-6_4.tif:0010-0816	0.933	152.865	0	759	83.953	83.594	0.946	142.606	13605	1.341	0.746	0.922	0.749493
421	IFT88_KAN487-6_4.tif:0011-0883	1.635	479.019	0	2413	109.861	90.454	0.949	783.278	74727	1.2	0.833	0.94	4.11667
422	IFT88_KAN487-6_4.tif:0012-1025	0.943	141.711	0	759	0.718	104.938	0.957	133.686	12754	1.352	0.74	0.942	0.702612
423	IFT88_KAN487-6_5.tif:0001-0042	0.985	282.819	0	1297	107.168	4.338	0.853	278.66	26585	1.164	0.859	0.891	1.46455
424	IFT88_KAN487-6_5.tif:0002-0102	0.818	83.744	0	626	37.65	10.431	0.935	68.468	6532	1.097	0.911	0.907	0.359845
425	IFT88_KAN487-6_5.tif:0003-0117	0.681	238.662	0	810	88.228	12.034	0.935	162.605	15513	1.283	0.779	0.922	0.854604
426	IFT88_KAN487-6_5.tif:0004-0193	1.069	170.314	0	831	59.395	19.813	0.87	182.091	17372	1.296	0.772	0.911	0.957015
427	IFT88_KAN487-6_5.tif:0005-0240	1.122	127.14	0	912	125.601	24.566	0.757	142.595	13604	1.902	0.526	0.907	0.749438
428	IFT88_KAN487-6_5.tif:0006-0339	1.059	175.475	0	904	125.368	34.769	0.765	185.77	17723	1.319	0.758	0.898	0.976351
429	IFT88_KAN487-6_5.tif:0007-0430	0.818	82.667	0	449	38.537	44.093	0.801	67.587	6448	1.272	0.786	0.862	0.355217
430	IFT88_KAN487-6_5.tif:0008-0536	1.467	247.179	0	1865	84.679	54.89	0.778	362.725	34605	1.964	0.509	0.921	1.90637
431	IFT88_KAN487-6_5.tif:0009-0553	1.048	80.28	0	373	132.607	56.669	0.937	84.148	8028	1.222	0.818	0.905	0.442259
432	IFT88_KAN487-6_5.tif:0010-0619	0.66	79.476	0	358	7.45	63.375	0.871	52.483	5007	1.427	0.701	0.9	0.275833
433	IFT88_KAN487-6_5.tif:0011-0743	1.279	204.23	0	1159	104.722	76.067	0.844	261.166	24916	1.398	0.715	0.881	1.37261
434	IFT88_KAN487-6_5.tif:0012-0885	0.922	241.443	0	929	107.87	90.647	0.949	222.708	21247	1.246	0.803	0.951	1.17049
435	IFT88_KAN487-6_5.tif:0013-0942	1.614	187.909	0	1711	88.833	96.447	0.731	303.324	28938	1.892	0.529	0.885	1.59418
436	IFT88_KAN487-6_6.tif:0001-0102	0.985	257.915	0	1491	54.488	10.447	0.892	254.122	24244	1.311	0.763	0.917	1.33559
437	IFT88_KAN487-6_6.tif:0002-0256	1.499	183.72	0	1374	55.627	26.264	0.787	275.379	26272	1.526	0.655	0.885	1.44731
438	IFT88_KAN487-6_6.tif:0003-0257	1.457	189.633	0	1344	114.576	26.341	0.877	276.291	26359	1.266	0.79	0.93	1.4521
439	IFT88_KAN487-6_6.tif:0004-0403	1.52	139.91	0	1022	22.49	41.302	0.782	212.645	20287	2.053	0.487	0.89	1.1176
440	IFT88_KAN487-6_6.tif:0005-0505	1.321	263.175	0	1813	77.511	51.699	0.775	347.578	33160	1.912	0.523	0.881	1.82677
441	IFT88_KAN487-6_6.tif:0006-0511	0.765	111.973	0	335	125.433	52.345	0.994	85.679	8174	1.224	0.817	0.918	0.450302
442	IFT88_KAN487-6_6.tif:0007-0645	1.027	44.357	0	428	15.366	66.088	0.974	45.565	4347	1.122	0.891	0.951	0.239474
443	IFT88_KAN487-6_6.tif:0008-0689	1.321	220.278	0	1577	137.342	70.527	0.921	290.924	27755	1.234	0.811	0.91	1.52901
444	IFT88_KAN487-6_6.tif:0009-0788	1.467	260.264	0	1635	81.004	80.656	0.797	381.928	36437	1.514	0.661	0.909	2.0073
445	IFT88_KAN487-6_6.tif:0010-0823	0.786	74.147	0	680	14.43	84.272	0.912	58.29	5561	1.169	0.856	0.932	0.306353
446	IFT88_KAN487-6_6.tif:0011-0870	1.174	165.527	0	918	34.183	89.071	0.943	194.323	18539	1.103	0.907	0.914	1.0213
447	IFT88_KAN487-6_6.tif:0012-0913	1.331	174.906	0	978	131.379	93.481	0.855	232.834	22213	1.323	0.756	0.904	1.2237
										19407.1				1.06913

## Sheet: IF condition
Exp. number	Cell line	Culture condition	Fixation condition	rabbit-Alexa488	mouse IgG1-Alexa568	mouse IgG2b-Alexa647	Nuclear stain	Date	Replicate
KAN487-1	RPE-BFP-Cas9 pMCB306 (pool)	Serum starved for 24 hours	Fixed in 4% PFA at RT for 15 minutes.	IFT88, Proteintech, 13967-1-AP, 1:1000	CEP170, Invitrogen, 41-3200, 1:1000	Ac-Tub, 6B-11, SIGMA, 1:2000	DAPI	2019-05-13	No.2
KAN487-2	RPE-BFP-Cas9 CEP89KO (pool)	Serum starved for 24 hours	Fixed in 4% PFA at RT for 15 minutes.	IFT88, Proteintech, 13967-1-AP, 1:1000	CEP170, Invitrogen, 41-3200, 1:1000	Ac-Tub, 6B-11, SIGMA, 1:2000	DAPI	2019-05-13	No.2
KAN487-3	RPE-BFP-Cas9 NCS1KO (pool)	Serum starved for 24 hours	Fixed in 4% PFA at RT for 15 minutes.	IFT88, Proteintech, 13967-1-AP, 1:1000	CEP170, Invitrogen, 41-3200, 1:1000	Ac-Tub, 6B-11, SIGMA, 1:2000	DAPI	2019-05-13	No.2
KAN487-4	RPE-BFP-Cas9 C3orf14KO (pool)	Serum starved for 24 hours	Fixed in 4% PFA at RT for 15 minutes.	IFT88, Proteintech, 13967-1-AP, 1:1000	CEP170, Invitrogen, 41-3200, 1:1000	Ac-Tub, 6B-11, SIGMA, 1:2000	DAPI	2019-05-13	No.2
KAN487-5	RPE-BFP-Cas9 Rab34KO (pool)	Serum starved for 24 hours	Fixed in 4% PFA at RT for 15 minutes.	IFT88, Proteintech, 13967-1-AP, 1:1000	CEP170, Invitrogen, 41-3200, 1:1000	Ac-Tub, 6B-11, SIGMA, 1:2000	DAPI	2019-05-13	No.2
KAN487-6	RPE-BFP-Cas9 Myo5AKO (pool)	Serum starved for 24 hours	Fixed in 4% PFA at RT for 15 minutes.	IFT88, Proteintech, 13967-1-AP, 1:1000	CEP170, Invitrogen, 41-3200, 1:1000	Ac-Tub, 6B-11, SIGMA, 1:2000	DAPI	2019-05-13	No.2
