# Supplementary material for: A hierarchical pathway for assembly of the distal appendages that organize primary cilia
Source: eLife. 2025 Jan 30;14:e85999. doi: 10.7554/eLife.85999 (PMC11984956; doi:10.7554/eLife.85999)
Supplement: Figure 4—source data 5. [file elife-85999-fig4-data5.xlsx]

## Sheet: Raw data
	Label	Area	Mean	Min	Max	X	Y	Circ	IntDen	RawIntDen	AR	Round	Noramlized Intensity
	sgGFP (pMCB306)
1	CEP19_KAN497-13_1.tif:0001-0098	0.66	219.968	8	754	5.432	10.039	0.937	145.258	13858	1.039	0.963	0.992	0.830134
2	CEP19_KAN497-13_1.tif:0002-0146	1.101	290.038	0	953	87.386	14.935	0.948	319.215	30454	1.122	0.892	0.981	1.82428
3	CEP19_KAN497-13_1.tif:0003-0190	0.587	263.375	0	898	140.979	19.504	0.92	154.597	14749	1.143	0.875	1	0.883508
4	CEP19_KAN497-13_1.tif:0004-0215	0.818	245.59	0	926	113.782	22.068	0.963	200.79	19156	1.026	0.975	0.981	1.1475
5	CEP19_KAN497-13_1.tif:0005-0293	0.514	223.163	14	495	51.242	30.049	0.935	114.619	10935	1	1	1	0.655038
6	CEP19_KAN497-13_1.tif:0006-0441	0.912	274.931	0	1135	117.324	45.215	0.951	250.716	23919	1.121	0.892	0.983	1.43282
7	CEP19_KAN497-13_1.tif:0007-0619	0.514	192.98	0	943	103.251	63.425	0.935	99.116	9456	1	1	1	0.566442
8	CEP19_KAN497-13_1.tif:0008-0629	0.891	283.694	0	1162	98.546	64.392	0.929	252.76	24114	1.15	0.87	0.971	1.4445
9	CEP19_KAN497-13_1.tif:0009-0714	0.66	215.317	0	617	71.456	73.094	0.937	142.186	13565	1.039	0.963	0.992	0.812583
10	CEP19_KAN497-13_1.tif:0010-0815	1.111	311.858	0	1364	127.617	83.432	0.927	346.499	33057	1.115	0.897	0.981	1.98021
11	CEP19_KAN497-13_1.tif:0011-0861	0.514	218.429	30	579	41.311	88.201	0.935	112.187	10703	1	1	1	0.641141
12	CEP19_KAN497-13_1.tif:0012-0916	0.839	331.288	0	1246	106.01	93.827	0.919	277.801	26503	1.031	0.97	0.994	1.58761
13	CEP19_KAN497-13_1.tif:0013-1027	0.587	248.304	0	738	62.708	105.145	0.92	145.75	13905	1.143	0.875	1	0.83295
14	CEP19_KAN497-13_2.tif:0001-0114	0.356	232.324	0	958	142.011	11.702	0.803	82.796	7899	2.264	0.442	0.971	0.473173
15	CEP19_KAN497-13_2.tif:0002-0227	0.755	287.694	0	985	68.288	23.292	0.903	217.121	20714	1.125	0.889	1	1.24083
16	CEP19_KAN497-13_2.tif:0003-0360	0.891	267.235	0	1242	117.845	36.913	0.962	238.095	22715	1.119	0.894	0.971	1.36069
17	CEP19_KAN497-13_2.tif:0004-0446	0.514	248	0	727	52.368	45.713	0.935	127.376	12152	1	1	1	0.72794
18	CEP19_KAN497-13_2.tif:0005-0448	0.514	202.041	6	501	2.406	45.918	0.935	103.77	9900	1	1	1	0.593039
19	CEP19_KAN497-13_2.tif:0006-0643	0.514	236.918	27	563	42.335	65.882	0.935	121.684	11609	1	1	1	0.695413
20	CEP19_KAN497-13_2.tif:0007-0650	0.912	302.77	0	1145	125.873	66.553	0.951	276.103	26341	1.114	0.897	0.983	1.5779
21	CEP19_KAN497-13_2.tif:0008-0793	0.514	174.408	11	561	50.423	81.239	0.935	89.578	8546	1	1	1	0.51193
22	CEP19_KAN497-13_2.tif:0009-0803	0.587	225.643	0	595	105.196	82.212	0.92	132.449	12636	1.143	0.875	1	0.756933
23	CEP19_KAN497-13_3.tif:0001-0006	0.566	225.944	0	759	133.287	0.656	0.926	127.889	12201	1.152	0.868	0.982	0.730875
24	CEP19_KAN497-13_3.tif:0002-0072	0.755	305.944	0	1353	49.194	7.371	0.903	230.894	22028	1.125	0.889	1	1.31954
25	CEP19_KAN497-13_3.tif:0003-0120	0.66	203.238	9	734	66.542	12.291	0.937	134.21	12804	1.039	0.963	0.992	0.766997
26	CEP19_KAN497-13_3.tif:0004-0263	0.514	222.796	30	556	98.337	26.977	0.935	114.43	10917	1	1	1	0.65396
27	CEP19_KAN497-13_3.tif:0005-0748	0.262	58.92	0	223	89.43	76.632	1	15.44	1473	1	1	1	0.088237
28	CEP19_KAN497-13_3.tif:0006-0773	0.86	266.89	0	1328	118.196	79.152	0.962	229.395	21885	1.19	0.841	0.965	1.31097
29	CEP19_KAN497-13_3.tif:0007-1030	0.514	205.184	6	570	85.539	105.504	0.935	105.385	10054	1	1	1	0.602264
30	CEP19_KAN497-13_4.tif:0001-0019	0.734	240.286	0	890	63.568	1.996	0.947	176.305	16820	1.125	0.889	0.986	1.00757
31	CEP19_KAN497-13_4.tif:0002-0033	0.65	196.194	0	843	57.743	3.379	0.96	127.501	12164	1.081	0.925	0.984	0.728659
32	CEP19_KAN497-13_4.tif:0003-0159	0.755	202.361	0	836	17.046	16.279	0.903	152.721	14570	1.125	0.889	1	0.872785
33	CEP19_KAN497-13_4.tif:0004-0181	0.514	182.898	2	894	67.93	18.582	0.935	93.938	8962	1	1	1	0.53685
34	CEP19_KAN497-13_4.tif:0005-0210	0.933	382.753	0	1740	89.281	21.547	0.909	357.065	34065	1.115	0.897	0.994	2.04059
35	CEP19_KAN497-13_4.tif:0006-0224	0.912	363.851	0	1672	110.105	22.929	0.889	331.803	31655	1.375	0.727	0.994	1.89623
36	CEP19_KAN497-13_4.tif:0007-0278	0.514	255.673	0	866	114.104	28.513	0.935	131.317	12528	1	1	1	0.750463
37	CEP19_KAN497-13_4.tif:0008-0285	0.514	252.204	0	732	37.318	29.23	0.935	129.535	12358	1	1	1	0.74028
38	CEP19_KAN497-13_4.tif:0009-0290	1.122	160.645	0	737	123.429	29.734	0.834	180.173	17189	1.634	0.612	0.922	1.02967
39	CEP19_KAN497-13_4.tif:0010-0304	0.985	273.085	0	1218	47.923	31.133	0.979	269.069	25670	1.046	0.956	0.974	1.53771
40	CEP19_KAN497-13_4.tif:0011-0451	0.723	239.101	0	896	80.989	46.229	0.933	172.93	16498	1.172	0.853	0.979	0.988278
41	CEP19_KAN497-13_4.tif:0012-0598	0.985	279.989	0	1116	82.613	61.233	0.979	275.872	26319	1.046	0.956	0.974	1.57658
42	CEP19_KAN497-13_4.tif:0013-0663	0.786	198.24	0	667	2.406	67.93	0.961	155.844	14868	1.19	0.84	0.974	0.890636
43	CEP19_KAN497-13_4.tif:0014-0768	0.514	136.939	0	736	87.485	78.68	0.935	70.333	6710	1	1	1	0.401948
44	CEP19_KAN497-13_4.tif:0015-0853	1.006	249.583	0	1390	97.377	87.28	0.815	251.145	23960	1.427	0.701	0.941	1.43527
45	CEP19_KAN497-13_4.tif:0016-0900	1.153	248.345	0	1470	126.089	92.183	0.691	286.343	27318	1.596	0.627	0.833	1.63643
46	CEP19_KAN497-13_4.tif:0017-0934	0.807	223.065	0	1004	64.291	95.619	0.917	180.036	17176	1.277	0.783	0.981	1.02889
47	CEP19_KAN497-13_4.tif:0018-0951	0.828	242.456	0	949	102.739	97.415	0.941	200.77	19154	1.064	0.94	0.988	1.14738
48	CEP19_KAN497-13_4.tif:0019-0996	0.901	250.372	0	1053	26.405	102.005	0.94	225.695	21532	1.123	0.891	0.983	1.28983
49	CEP19_KAN497-13_5.tif:0001-0004	0.22	103.524	3	489	36.806	0.461	0.846	22.788	2174	2.333	0.429	1	0.130229
50	CEP19_KAN497-13_5.tif:0002-0073	0.514	232.816	0	631	124.035	7.525	0.935	119.577	11408	1	1	1	0.683372
51	CEP19_KAN497-13_5.tif:0003-0089	0.587	194.375	0	483	47.812	9.163	0.92	114.095	10885	1.143	0.875	1	0.652043
52	CEP19_KAN497-13_5.tif:0004-0203	0.88	244.714	0	951	70.293	20.783	0.951	215.465	20556	1.163	0.86	0.971	1.23136
53	CEP19_KAN497-13_5.tif:0005-0250	0.514	232.49	0	1123	33.735	25.646	0.935	119.409	11392	1	1	1	0.682414
54	CEP19_KAN497-13_5.tif:0006-0387	0.65	270.29	0	868	128.693	39.621	0.96	175.655	16758	1.081	0.925	0.984	1.00385
55	CEP19_KAN497-13_5.tif:0007-0458	0.514	204.163	0	636	16.432	46.942	0.935	104.861	10004	1	1	1	0.599268
56	CEP19_KAN497-13_5.tif:0008-0508	0.807	268.584	10	1030	107.495	52.014	0.917	216.775	20681	1.277	0.783	0.981	1.23885
57	CEP19_KAN497-13_5.tif:0009-0643	0.734	236.214	0	925	86.512	65.882	0.947	173.318	16535	1.146	0.873	0.986	0.990494
58	CEP19_KAN497-13_5.tif:0010-0765	0.514	193.857	18	541	66.394	78.373	0.935	99.567	9499	1	1	1	0.569018
59	CEP19_KAN497-13_5.tif:0011-0828	1.405	288.224	0	1295	128.127	84.829	0.864	404.83	38622	1.32	0.758	0.937	2.31357
60	CEP19_KAN497-13_5.tif:0012-0902	0.744	258.986	0	1036	19.305	92.343	0.924	192.74	18388	1.13	0.885	0.993	1.10149
61	CEP19_KAN497-13_6.tif:0001-0026	0.514	192.633	0	506	83.389	2.713	0.935	98.938	9439	1	1	1	0.565423
62	CEP19_KAN497-13_6.tif:0002-0063	1.31	222.408	0	1148	86.041	6.412	0.86	291.406	27801	1.481	0.675	0.951	1.66536
63	CEP19_KAN497-13_6.tif:0003-0266	0.587	218.446	0	710	117.277	27.233	0.92	128.225	12233	1.143	0.875	1	0.732792
64	CEP19_KAN497-13_6.tif:0004-0377	0.87	266.108	15	930	79.956	38.644	0.94	231.513	22087	1.237	0.809	0.971	1.32308
65	CEP19_KAN497-13_6.tif:0005-0577	0.514	186.408	0	821	12.439	59.125	0.935	95.741	9134	1	1	1	0.547153
66	CEP19_KAN497-13_6.tif:0006-0703	0.587	232.357	8	789	125.826	72.025	0.92	136.39	13012	1.143	0.875	1	0.779456
67	CEP19_KAN497-13_6.tif:0007-0765	0.514	206.224	0	1007	11.62	78.373	0.935	105.919	10105	1	1	1	0.605319
										16693.7				1
	CEP89 KO
68	CEP19_KAN497-14_1.tif:0001-0076	0.734	223.057	0	763	10.023	7.822	0.911	163.664	15614	1.149	0.87	0.986	0.935324
69	CEP19_KAN497-14_1.tif:0002-0379	0.734	248.743	0	862	74.789	38.802	0.947	182.51	17412	1.146	0.873	0.986	1.04303
70	CEP19_KAN497-14_1.tif:0003-0599	0.587	205.089	7	580	37.523	61.326	0.92	120.384	11485	1.143	0.875	1	0.687985
71	CEP19_KAN497-14_1.tif:0004-0605	0.786	208.547	0	842	11.006	61.992	0.961	163.947	15641	1.19	0.84	0.974	0.936941
72	CEP19_KAN497-14_1.tif:0005-0633	0.66	252.349	8	965	80.932	64.858	0.9	166.641	15898	1.286	0.778	1	0.952336
73	CEP19_KAN497-14_1.tif:0006-0755	0.587	202.482	0	717	122.755	77.349	0.92	118.854	11339	1.143	0.875	1	0.679239
74	CEP19_KAN497-14_1.tif:0007-0874	0.818	226.179	0	727	42.349	89.537	0.929	184.921	17642	1.026	0.975	0.981	1.05681
75	CEP19_KAN497-14_1.tif:0008-0929	0.744	308.859	0	1261	99.202	95.169	0.924	229.857	21929	1.13	0.885	0.993	1.31361
76	CEP19_KAN497-14_1.tif:0009-1026	0.66	208.794	0	785	37.477	105.037	0.937	137.878	13154	1.039	0.963	0.992	0.787963
77	CEP19_KAN497-14_2.tif:0001-0068	0.734	235.657	15	705	5.733	7.013	0.947	172.909	16496	1.146	0.873	0.986	0.988158
78	CEP19_KAN497-14_2.tif:0002-0078	0.744	279.127	0	1017	75.295	7.991	0.924	207.729	19818	1.13	0.885	0.993	1.18716
79	CEP19_KAN497-14_2.tif:0003-0086	0.828	275.81	0	1050	123.727	8.856	0.941	228.389	21789	1.064	0.94	0.988	1.30522
80	CEP19_KAN497-14_2.tif:0004-0307	0.807	223.26	0	943	2.257	31.417	0.917	180.194	17191	1.259	0.794	0.981	1.02979
81	CEP19_KAN497-14_2.tif:0005-0319	0.514	230.02	30	626	103.456	32.711	0.935	118.141	11271	1	1	1	0.675165
82	CEP19_KAN497-14_2.tif:0006-0445	0.744	203.042	0	667	73.31	45.605	0.924	151.106	14416	1.13	0.885	0.993	0.86356
83	CEP19_KAN497-14_2.tif:0007-0542	0.514	217.245	2	541	35.065	55.542	0.935	111.579	10645	1	1	1	0.637666
84	CEP19_KAN497-14_2.tif:0008-0747	0.65	217.726	8	698	109.65	76.479	0.96	141.495	13499	1.081	0.925	0.984	0.808629
85	CEP19_KAN497-14_2.tif:0009-0821	0.66	215.873	0	645	22.837	84.06	0.937	142.553	13600	1.039	0.963	0.992	0.814679
86	CEP19_KAN497-14_2.tif:0010-0893	0.818	254.526	3	1133	120.707	91.426	0.929	208.096	19853	1.259	0.794	0.987	1.18925
87	CEP19_KAN497-14_3.tif:0001-0232	0.901	206.093	0	567	119.427	23.752	0.974	185.78	17724	1.11	0.901	0.977	1.06172
88	CEP19_KAN497-14_3.tif:0002-0264	0.807	241	0	1028	27.843	27.015	0.917	194.512	18557	1.259	0.794	0.981	1.11162
89	CEP19_KAN497-14_3.tif:0003-0415	0.514	196.327	0	438	94.242	42.539	0.935	100.835	9620	1	1	1	0.576266
90	CEP19_KAN497-14_3.tif:0004-0642	0.514	179.469	4	529	31.482	65.78	0.935	92.177	8794	1	1	1	0.526786
91	CEP19_KAN497-14_3.tif:0005-0808	0.671	211.625	0	634	98.183	82.724	0.914	141.966	13544	1	1	1	0.811325
92	CEP19_KAN497-14_3.tif:0006-0850	0.66	224.667	0	763	73.97	87.075	0.9	148.36	14154	1.286	0.778	1	0.847865
93	CEP19_KAN497-14_4.tif:0001-0186	0.818	212	0	702	55.946	19.099	0.963	173.328	16536	1.032	0.969	0.981	0.990554
94	CEP19_KAN497-14_4.tif:0002-0529	0.587	247.25	15	732	53.289	54.16	0.92	145.132	13846	1.143	0.875	1	0.829415
95	CEP19_KAN497-14_4.tif:0003-0623	0.587	216.143	0	656	94.037	63.783	0.92	126.872	12104	1.143	0.875	1	0.725065
96	CEP19_KAN497-14_4.tif:0004-0698	0.839	304.65	0	1183	111.39	71.462	0.887	255.464	24372	1.25	0.8	1	1.45995
97	CEP19_KAN497-14_4.tif:0005-0831	0.66	197.365	0	687	17.194	85.073	0.937	130.331	12434	1.039	0.963	0.992	0.744832
98	CEP19_KAN497-14_4.tif:0006-0842	1.195	291.202	0	1041	51.711	86.212	0.955	347.966	33197	1.201	0.833	0.979	1.9886
99	CEP19_KAN497-14_4.tif:0007-0848	1.289	421.78	0	1738	54.857	86.853	0.959	543.788	51879	1.125	0.889	0.976	3.1077
100	CEP19_KAN497-14_4.tif:0008-0985	0.671	236.547	0	912	42.693	100.845	0.914	158.685	15139	1	1	1	0.90687
101	CEP19_KAN497-14_4.tif:0009-1003	0.734	219.671	0	756	95.829	102.739	0.947	161.18	15377	1.146	0.873	0.986	0.921127
102	CEP19_KAN497-14_5.tif:0001-0211	1.73	243.03	0	1397	106.27	21.592	0.664	420.323	40100	2.602	0.384	0.935	2.40211
103	CEP19_KAN497-14_5.tif:0002-0259	0.985	306.351	0	1687	36.299	26.555	0.917	301.846	28797	1.235	0.81	0.974	1.72502
104	CEP19_KAN497-14_5.tif:0003-0259	0.514	247.429	11	729	74.892	26.568	0.935	127.082	12124	1	1	1	0.726263
105	CEP19_KAN497-14_5.tif:0004-0403	0.514	232.061	28	790	103.763	41.311	0.935	119.189	11371	1	1	1	0.681156
106	CEP19_KAN497-14_5.tif:0005-0536	0.514	184.061	0	740	104.685	54.927	0.935	94.536	9019	1	1	1	0.540264
107	CEP19_KAN497-14_5.tif:0006-0586	0.514	233.245	0	789	100.896	60.046	0.935	119.797	11429	1	1	1	0.68463
108	CEP19_KAN497-14_5.tif:0007-0608	0.514	248.918	0	756	14.487	62.299	0.935	127.847	12197	1	1	1	0.730635
109	CEP19_KAN497-14_5.tif:0008-0794	0.273	158.308	0	596	142.058	81.326	0.736	43.143	4116	2.952	0.339	0.981	0.24656
110	CEP19_KAN497-14_5.tif:0009-0803	0.744	284.761	0	1121	82.678	82.217	0.924	211.922	20218	1.13	0.885	0.993	1.21112
111	CEP19_KAN497-14_5.tif:0010-0866	0.797	272.895	0	1040	107.352	88.717	0.939	217.394	20740	1.155	0.866	0.974	1.24239
112	CEP19_KAN497-14_6.tif:0001-0256	0.65	237.032	8	842	100.129	26.21	0.96	154.041	14696	1.081	0.925	0.984	0.880333
113	CEP19_KAN497-14_6.tif:0002-0287	0.514	193.612	0	577	31.687	29.435	0.935	99.441	9487	1	1	1	0.568299
114	CEP19_KAN497-14_6.tif:0003-0375	1.006	275.562	0	1036	124.905	38.393	0.967	277.287	26454	1	1	0.98	1.58467
115	CEP19_KAN497-14_6.tif:0004-0497	0.66	192.127	4	488	43.518	50.878	0.937	126.872	12104	1.039	0.963	0.992	0.725065
116	CEP19_KAN497-14_6.tif:0005-0575	0.818	195.474	0	677	64.556	58.935	0.929	159.817	15247	1.026	0.975	0.981	0.913339
117	CEP19_KAN497-14_6.tif:0006-0600	0.587	208.821	0	742	15.204	61.429	0.92	122.575	11694	1.143	0.875	1	0.700504
118	CEP19_KAN497-14_6.tif:0007-0674	0.514	197.796	0	655	136.73	69.056	0.935	101.59	9692	1	1	1	0.580579
119	CEP19_KAN497-14_6.tif:0008-0793	0.912	288.621	0	1123	84.766	81.226	0.919	263.199	25110	1.107	0.903	0.983	1.50416
120	CEP19_KAN497-14_6.tif:0009-0871	0.723	211.565	0	750	35.828	89.221	0.933	153.014	14598	1.172	0.853	0.979	0.874462
										16701.2				1.00045
	NCS1 KO
121	CEP19_KAN497-15_1.tif:0001-0033	0.818	243.808	0	783	117.124	3.379	0.929	199.334	19017	1.259	0.794	0.987	1.13917
122	CEP19_KAN497-15_1.tif:0002-0105	1.258	250.7	0	1646	89.618	10.738	0.898	315.336	30084	1.459	0.685	0.934	1.80212
123	CEP19_KAN497-15_1.tif:0003-0134	0.797	183.513	0	660	130.285	13.699	0.861	146.19	13947	1.287	0.777	0.916	0.835466
124	CEP19_KAN497-15_1.tif:0004-0222	0.65	270.452	2	723	20.169	22.729	0.96	175.76	16768	1.081	0.925	0.984	1.00445
125	CEP19_KAN497-15_1.tif:0005-0355	0.734	196.214	4	569	52.204	36.396	0.947	143.968	13735	1.125	0.889	0.986	0.822766
126	CEP19_KAN497-15_1.tif:0006-0483	0.65	275.5	0	963	103.405	49.45	0.96	179.041	17081	1.081	0.925	0.984	1.0232
127	CEP19_KAN497-15_1.tif:0007-0721	0.65	210.145	0	596	76.683	73.817	0.96	136.568	13029	1.081	0.925	0.984	0.780475
128	CEP19_KAN497-15_1.tif:0008-0723	0.514	216.061	0	716	27.899	74.073	0.935	110.971	10587	1	1	1	0.634192
129	CEP19_KAN497-15_1.tif:0009-0944	0.985	214.074	0	649	23.556	96.656	0.979	210.926	20123	1.046	0.956	0.974	1.20543
130	CEP19_KAN497-15_2.tif:0001-0092	0.985	250.053	0	841	131.671	9.428	0.979	246.376	23505	1.046	0.956	0.974	1.40802
131	CEP19_KAN497-15_2.tif:0002-0093	0.514	224.143	41	599	1.587	9.573	0.935	115.122	10983	1	1	1	0.657913
132	CEP19_KAN497-15_2.tif:0003-0110	0.262	165.36	65	241	97.415	11.313	1	43.332	4134	1	1	1	0.247639
133	CEP19_KAN497-15_2.tif:0004-0146	1.101	344.61	0	1502	112.837	15.001	0.919	379.276	36184	1.131	0.884	0.977	2.16753
134	CEP19_KAN497-15_2.tif:0005-0210	0.912	294.494	0	1076	119.432	21.505	0.951	268.556	25621	1.114	0.897	0.983	1.53477
135	CEP19_KAN497-15_2.tif:0006-0216	0.901	363.43	0	2215	26.014	22.157	0.94	327.611	31255	1.16	0.862	0.983	1.87226
136	CEP19_KAN497-15_2.tif:0007-0464	1.006	298.073	0	1022	62.248	47.505	0.967	299.938	28615	1	1	0.98	1.71412
137	CEP19_KAN497-15_2.tif:0008-0642	0.88	245.214	0	838	132.541	65.729	0.951	215.905	20598	1.163	0.86	0.971	1.23388
138	CEP19_KAN497-15_2.tif:0009-0785	0.367	8.486	0	37	139.187	80.42	0.938	3.113	297	1.4	0.714	1	0.0177912
139	CEP19_KAN497-15_2.tif:0010-0791	0.377	4.722	0	22	140.057	80.983	0.965	1.782	170	1	1	1	0.0101835
140	CEP19_KAN497-15_2.tif:0011-0805	0.891	209.8	0	669	25.344	82.412	0.962	186.923	17833	1.119	0.894	0.971	1.06825
141	CEP19_KAN497-15_2.tif:0012-0897	0.514	222.551	14	639	52.982	91.887	0.935	114.305	10905	1	1	1	0.653241
142	CEP19_KAN497-15_2.tif:0013-0947	0.818	214.321	0	727	40.338	96.964	0.929	175.225	16717	1.249	0.801	0.987	1.0014
143	CEP19_KAN497-15_3.tif:0001-0007	0.356	207.118	0	898	0.503	0.747	0.803	73.813	7042	2.264	0.442	0.971	0.421836
144	CEP19_KAN497-15_3.tif:0002-0011	1.216	300.853	0	1621	66.684	1.079	0.844	365.806	34899	1.416	0.706	0.921	2.09055
145	CEP19_KAN497-15_3.tif:0003-0028	0.933	260.18	0	854	9.27	2.872	0.909	242.718	23156	1.115	0.897	0.994	1.38711
146	CEP19_KAN497-15_3.tif:0004-0045	0.587	268.411	3	931	47.761	4.607	0.92	157.553	15031	1.143	0.875	1	0.9004
147	CEP19_KAN497-15_3.tif:0005-0135	1.122	268.355	0	1365	91.736	13.799	0.953	300.976	28714	1.198	0.834	0.955	1.72005
148	CEP19_KAN497-15_3.tif:0006-0359	0.744	236.972	0	702	64.136	36.75	0.924	176.357	16825	1.13	0.885	0.993	1.00787
149	CEP19_KAN497-15_3.tif:0007-0377	0.797	229.25	0	819	93.78	38.575	0.905	182.625	17423	1.24	0.806	0.974	1.04369
150	CEP19_KAN497-15_3.tif:0008-0397	0.514	202.429	7	748	134.58	40.696	0.935	103.97	9919	1	1	1	0.594177
151	CEP19_KAN497-15_3.tif:0009-0420	0.514	175.061	0	770	134.682	43.051	0.935	89.913	8578	1	1	1	0.513847
152	CEP19_KAN497-15_3.tif:0010-0435	0.901	325.884	0	1081	133.863	44.536	0.974	293.765	28026	1.11	0.901	0.977	1.67884
153	CEP19_KAN497-15_3.tif:0011-0489	0.839	325.137	9	1313	28.667	50.064	0.887	272.644	26011	1.25	0.8	1	1.55813
154	CEP19_KAN497-15_3.tif:0012-0490	0.891	239.647	0	855	121.42	50.223	0.997	213.515	20370	1.119	0.894	0.971	1.22022
155	CEP19_KAN497-15_3.tif:0013-0525	0.472	260.111	0	626	141.951	53.801	0.859	122.69	11705	1.8	0.556	1	0.701163
156	CEP19_KAN497-15_3.tif:0014-0718	0.901	268.326	5	1160	129.563	73.519	0.94	241.879	23076	1.129	0.886	0.977	1.38232
157	CEP19_KAN497-15_3.tif:0015-0735	0.734	207.114	0	615	5.262	75.24	0.911	151.966	14498	1.149	0.87	0.986	0.868472
158	CEP19_KAN497-15_3.tif:0016-0747	0.66	222.079	3	470	85.482	76.473	0.937	146.652	13991	1.039	0.963	0.992	0.838101
159	CEP19_KAN497-15_3.tif:0017-0797	0.744	228.972	0	778	47.397	81.655	0.924	170.404	16257	1.13	0.885	0.993	0.973841
160	CEP19_KAN497-15_3.tif:0018-0823	0.514	193.061	0	936	98.337	84.311	0.935	99.158	9460	1	1	1	0.566681
161	CEP19_KAN497-15_3.tif:0019-0875	0.66	214.317	35	573	72.799	89.589	0.937	141.526	13502	1.039	0.963	0.992	0.808809
162	CEP19_KAN497-15_3.tif:0020-0913	0.786	226.293	0	1038	106.835	93.525	0.961	177.898	16972	1.19	0.84	0.974	1.01667
163	CEP19_KAN497-15_4.tif:0001-0005	0.409	486.59	0	3155	37.664	0.508	0.78	198.914	18977	2.482	0.403	0.987	1.13678
164	CEP19_KAN497-15_4.tif:0002-0024	1.101	399.514	0	2100	65.921	2.504	0.948	439.704	41949	1.122	0.892	0.981	2.51287
165	CEP19_KAN497-15_4.tif:0003-0070	0.734	267.571	0	1174	88.662	7.218	0.947	196.325	18730	1.146	0.873	0.986	1.12198
166	CEP19_KAN497-15_4.tif:0004-0222	0.514	142.061	6	821	61.48	22.78	0.935	72.964	6961	1	1	1	0.416984
167	CEP19_KAN497-15_4.tif:0005-0312	0.514	216.673	15	658	54.62	31.994	0.935	111.286	10617	1	1	1	0.635989
168	CEP19_KAN497-15_4.tif:0006-0448	0.776	128.041	0	378	20.165	45.893	0.838	99.316	9475	1.598	0.626	0.914	0.56758
169	CEP19_KAN497-15_4.tif:0007-0557	0.587	247.054	0	1384	124.188	57.077	0.92	145.017	13835	1.143	0.875	1	0.828756
170	CEP19_KAN497-15_4.tif:0008-0607	0.66	234.937	0	834	79.704	62.196	0.9	155.142	14801	1.286	0.778	1	0.886623
171	CEP19_KAN497-15_4.tif:0009-0637	0.797	306.092	0	1331	42.033	65.264	0.974	243.839	23263	1.155	0.866	0.974	1.39352
172	CEP19_KAN497-15_4.tif:0010-0813	0.901	179.64	0	922	61.802	83.248	0.867	161.934	15449	1.225	0.816	0.925	0.92544
173	CEP19_KAN497-15_4.tif:0011-0853	0.514	212.408	0	602	41.823	87.382	0.935	109.095	10408	1	1	1	0.623469
174	CEP19_KAN497-15_4.tif:0012-0938	0.66	252.476	0	972	79.089	96.085	0.9	166.724	15906	1.286	0.778	1	0.952815
175	CEP19_KAN497-15_4.tif:0013-0988	0.367	106.857	27	179	129.314	101.16	0.991	39.202	3740	1.065	0.939	0.986	0.224037
176	CEP19_KAN497-15_4.tif:0014-1028	0.587	220.125	0	790	7.064	105.299	0.92	129.21	12327	1.143	0.875	1	0.738423
177	CEP19_KAN497-15_5.tif:0001-0006	0.65	276.274	0	626	68.039	0.661	0.922	179.544	17129	1.288	0.776	0.992	1.02608
178	CEP19_KAN497-15_5.tif:0002-0081	1.09	233.173	0	1084	10.527	8.253	0.898	254.185	24250	1.255	0.797	0.937	1.45264
179	CEP19_KAN497-15_5.tif:0003-0148	0.514	192.571	3	959	127.311	15.204	0.935	98.907	9436	1	1	1	0.565244
180	CEP19_KAN497-15_5.tif:0004-0162	1.006	283.896	0	1458	110.24	16.586	0.924	285.673	27254	1.212	0.825	0.955	1.63259
181	CEP19_KAN497-15_5.tif:0005-0201	1.048	270.24	0	934	47.443	20.65	0.848	283.262	27024	1.316	0.76	0.962	1.61882
182	CEP19_KAN497-15_5.tif:0006-0244	0.514	189.347	7	575	5.17	25.032	0.935	97.251	9278	1	1	1	0.555779
183	CEP19_KAN497-15_5.tif:0007-0642	0.828	295.506	0	999	118.506	65.78	0.941	244.699	23345	1.064	0.94	0.988	1.39843
184	CEP19_KAN497-15_5.tif:0008-0717	0.514	246.653	3	554	93.627	73.458	0.935	126.684	12086	1	1	1	0.723986
185	CEP19_KAN497-15_5.tif:0009-0789	0.912	272.057	0	846	76.944	80.784	0.951	248.095	23669	1.114	0.897	0.983	1.41784
186	CEP19_KAN497-15_5.tif:0010-0880	0.514	182.98	3	1036	121.782	90.146	0.935	93.98	8966	1	1	1	0.537089
187	CEP19_KAN497-15_5.tif:0011-0932	0.65	211.226	17	497	42.181	95.419	0.96	137.27	13096	1.081	0.925	0.984	0.784488
188	CEP19_KAN497-15_5.tif:0012-1002	0.922	323.784	0	1538	121.424	102.637	0.93	298.66	28493	1.126	0.888	0.989	1.70681
189	CEP19_KAN497-15_6.tif:0001-0241	0.66	220.841	0	630	110.566	24.668	0.937	145.834	13913	1.039	0.963	0.992	0.833429
190	CEP19_KAN497-15_6.tif:0002-0248	0.734	240.1	0	910	79.448	25.442	0.947	176.169	16807	1.146	0.873	0.986	1.00679
191	CEP19_KAN497-15_6.tif:0003-0434	0.744	232.507	0	800	39.576	44.438	0.924	173.035	16508	1.13	0.885	0.993	0.988877
192	CEP19_KAN497-15_6.tif:0004-0713	0.828	237.342	0	794	72.082	73.002	0.908	196.535	18750	1.252	0.799	0.994	1.12318
193	CEP19_KAN497-15_6.tif:0005-0807	0.891	210.412	0	461	137.861	82.617	0.962	187.468	17885	1.119	0.894	0.971	1.07136
194	CEP19_KAN497-15_6.tif:0006-0814	0.66	270.937	18	763	80.671	83.332	0.937	178.915	17069	1.039	0.963	0.992	1.02248
195	CEP19_KAN497-15_6.tif:0007-0871	0.828	254.076	0	942	123.011	89.225	0.941	210.392	20072	1.064	0.94	0.988	1.20237
196	CEP19_KAN497-15_6.tif:0008-0889	0.66	190.984	0	558	8.651	91.068	0.9	126.118	12032	1.286	0.778	1	0.720752
										17238.7				1.03265
	C3ORF14 KO
197	CEP19_KAN497-16_1.tif:0001-0045	0.514	187.388	0	724	61.275	4.658	0.935	96.244	9182	1	1	1	0.550028
198	CEP19_KAN497-16_1.tif:0002-0049	0.66	338.032	0	1694	79.556	5.022	0.937	223.222	21296	1.039	0.963	0.992	1.27569
199	CEP19_KAN497-16_1.tif:0003-0081	0.587	322.304	14	1732	80.523	8.293	0.92	189.187	18049	1.143	0.875	1	1.08119
200	CEP19_KAN497-16_1.tif:0004-0084	0.587	221.911	2	662	91.529	8.651	0.92	130.258	12427	1.143	0.875	1	0.744413
201	CEP19_KAN497-16_1.tif:0005-0138	0.587	278.75	0	1442	84.669	14.18	0.92	163.622	15610	1.143	0.875	1	0.935084
202	CEP19_KAN497-16_1.tif:0006-0177	0.891	257.812	0	1294	124.84	18.126	0.962	229.699	21914	1.139	0.878	0.977	1.31271
203	CEP19_KAN497-16_1.tif:0007-0194	0.587	249	22	934	85.846	19.862	0.92	146.159	13944	1.143	0.875	1	0.835286
204	CEP19_KAN497-16_1.tif:0008-0216	0.514	247.959	9	792	83.492	22.165	0.935	127.355	12150	1	1	1	0.72782
205	CEP19_KAN497-16_1.tif:0009-0258	0.514	214.531	0	900	78.27	26.465	0.935	110.185	10512	1	1	1	0.629699
206	CEP19_KAN497-16_1.tif:0010-0275	0.514	196.041	0	1056	82.775	28.206	0.935	100.689	9606	1	1	1	0.575427
207	CEP19_KAN497-16_1.tif:0011-0332	0.514	214.531	0	1114	87.792	34.042	0.935	110.185	10512	1	1	1	0.629699
208	CEP19_KAN497-16_1.tif:0012-0349	1.247	186.563	0	1257	88.713	35.782	0.717	232.708	22201	2.429	0.412	1	1.3299
209	CEP19_KAN497-16_1.tif:0013-0360	0.514	231.551	0	460	79.601	36.908	0.935	118.927	11346	1	1	1	0.679658
210	CEP19_KAN497-16_1.tif:0014-0378	0.66	298.444	0	2116	85.084	38.706	0.937	197.08	18802	1.039	0.963	0.992	1.12629
211	CEP19_KAN497-16_1.tif:0015-0435	0.514	187.041	0	767	85.539	44.587	0.935	96.066	9165	1	1	1	0.54901
212	CEP19_KAN497-16_1.tif:0016-0450	0.723	237.681	5	1045	87.131	46.127	0.933	171.902	16400	1.172	0.853	0.979	0.982407
213	CEP19_KAN497-16_1.tif:0017-0451	0.514	155.776	0	482	88.611	46.225	0.935	80.008	7633	1	1	1	0.457239
214	CEP19_KAN497-16_1.tif:0018-0463	0.514	254.02	0	1309	95.061	47.454	0.935	130.468	12447	1	1	1	0.745611
215	CEP19_KAN497-16_1.tif:0019-0509	0.587	273.196	0	1288	84.925	52.112	0.92	160.362	15299	1.143	0.875	1	0.916454
216	CEP19_KAN497-16_1.tif:0020-0607	0.587	217.071	12	639	15.152	62.196	0.92	127.417	12156	1.143	0.875	1	0.728179
217	CEP19_KAN497-16_1.tif:0021-0617	0.671	225.312	0	414	42.693	63.169	0.914	151.148	14420	1	1	1	0.8638
218	CEP19_KAN497-16_1.tif:0022-0723	0.734	235.486	0	913	1.485	74.021	0.947	172.783	16484	1.146	0.873	0.986	0.987439
219	CEP19_KAN497-16_1.tif:0023-0775	1.017	279.155	0	1053	123.988	79.34	0.946	283.828	27078	1.026	0.974	0.985	1.62205
220	CEP19_KAN497-16_1.tif:0024-0870	0.723	202.739	0	748	74.948	89.118	0.933	146.631	13989	1.172	0.853	0.979	0.837981
221	CEP19_KAN497-16_1.tif:0025-0983	0.587	228.554	0	1179	101.511	100.64	0.92	134.157	12799	1.143	0.875	1	0.766697
222	CEP19_KAN497-16_1.tif:0026-0990	0.514	259.408	7	1329	96.392	101.408	0.935	133.235	12711	1	1	1	0.761426
223	CEP19_KAN497-16_2.tif:0001-0068	0.901	232.709	1	676	66.198	6.952	0.94	209.773	20013	1.16	0.862	0.983	1.19884
224	CEP19_KAN497-16_2.tif:0002-0257	0.996	291.705	0	1039	58.204	26.353	0.926	290.473	27712	1.232	0.812	0.979	1.66003
225	CEP19_KAN497-16_2.tif:0003-0418	0.901	299.86	0	1308	83.143	42.864	0.94	270.306	25788	1.123	0.891	0.983	1.54478
226	CEP19_KAN497-16_2.tif:0004-0586	0.734	253.771	0	874	87.587	59.995	0.947	186.2	17764	1.146	0.873	0.986	1.06411
227	CEP19_KAN497-16_2.tif:0005-0630	0.734	275.7	0	1161	20.824	64.51	0.947	202.289	19299	1.149	0.87	0.986	1.15607
228	CEP19_KAN497-16_2.tif:0006-0757	0.514	203.776	11	1090	133.556	77.554	0.935	104.661	9985	1	1	1	0.59813
229	CEP19_KAN497-16_2.tif:0007-0774	0.744	249.577	0	939	10.643	79.3	0.924	185.739	17720	1.13	0.885	0.993	1.06148
230	CEP19_KAN497-16_2.tif:0008-0803	0.514	166.469	0	1056	138.163	82.263	0.935	85.501	8157	1	1	1	0.488628
231	CEP19_KAN497-16_2.tif:0009-0829	0.514	233.878	7	1238	135.706	84.925	0.935	120.122	11460	1	1	1	0.686487
232	CEP19_KAN497-16_3.tif:0001-0095	0.807	229.156	0	847	4.761	9.787	0.951	184.952	17645	1.06	0.944	0.975	1.05699
233	CEP19_KAN497-16_3.tif:0002-0133	0.985	319.415	0	1430	112.925	13.616	0.947	314.718	30025	1.045	0.957	0.969	1.79858
234	CEP19_KAN497-16_3.tif:0003-0223	0.891	258.388	0	1099	64.974	22.835	0.962	230.213	21963	1.139	0.878	0.977	1.31565
235	CEP19_KAN497-16_3.tif:0004-0525	0.807	237.455	0	958	12.579	53.764	0.917	191.65	18284	1.286	0.778	0.981	1.09526
236	CEP19_KAN497-16_3.tif:0005-0597	0.639	360.738	0	1272	141.857	61.159	0.907	230.653	22005	1.28	0.781	0.984	1.31816
237	CEP19_KAN497-16_3.tif:0006-0706	0.734	217.914	2	921	20.773	72.332	0.947	159.89	15254	1.125	0.889	0.986	0.913759
238	CEP19_KAN497-16_3.tif:0007-0917	0.692	204.227	0	705	107.283	93.931	0.892	141.285	13479	1.247	0.802	0.957	0.807431
239	CEP19_KAN497-16_3.tif:0008-0924	0.912	234.517	0	762	130.377	94.595	0.951	213.861	20403	1.114	0.897	0.983	1.2222
240	CEP19_KAN497-16_3.tif:0009-1033	0.744	274.352	13	833	25.55	105.765	0.924	204.176	19479	1.13	0.885	0.993	1.16685
241	CEP19_KAN497-16_4.tif:0001-0006	0.556	240.925	0	883	1.902	0.609	0.909	133.843	12769	1.5	0.667	0.991	0.7649
242	CEP19_KAN497-16_4.tif:0002-0238	0.985	187.404	0	750	109.438	24.334	0.798	184.648	17616	1.729	0.578	0.949	1.05525
243	CEP19_KAN497-16_4.tif:0003-0250	0.828	290.62	0	1205	130.03	25.591	0.908	240.653	22959	1.252	0.799	0.994	1.37531
244	CEP19_KAN497-16_4.tif:0004-0285	0.734	269.143	0	1039	4.443	29.189	0.947	197.478	18840	1.149	0.87	0.986	1.12857
245	CEP19_KAN497-16_4.tif:0005-0292	0.744	253.099	13	748	21.198	29.941	0.924	188.359	17970	1.13	0.885	0.993	1.07645
246	CEP19_KAN497-16_4.tif:0006-0410	0.901	299.64	1	1184	133.65	41.967	0.94	270.107	25769	1.16	0.862	0.983	1.54364
247	CEP19_KAN497-16_4.tif:0007-0437	0.828	282.506	0	1520	71.923	44.781	0.941	233.934	22318	1.001	0.999	0.988	1.33691
248	CEP19_KAN497-16_4.tif:0008-0542	0.734	248.471	0	889	61.541	55.531	0.911	182.311	17393	1.149	0.87	0.986	1.04189
249	CEP19_KAN497-16_4.tif:0009-0576	1.509	453.111	0	2657	137.864	59.028	0.895	683.92	65248	1.431	0.699	0.947	3.90854
250	CEP19_KAN497-16_4.tif:0010-0593	0.744	237.479	16	657	108.262	60.717	0.924	176.735	16861	1.13	0.885	0.993	1.01002
251	CEP19_KAN497-16_4.tif:0011-0744	1.038	139.707	0	701	138.126	76.167	0.759	144.975	13831	1.633	0.612	0.917	0.828517
252	CEP19_KAN497-16_4.tif:0012-0771	0.66	208.476	0	761	19.196	78.987	0.9	137.669	13134	1.286	0.778	1	0.786765
253	CEP19_KAN497-16_4.tif:0013-0822	0.66	257.159	0	842	128.289	84.151	0.937	169.817	16201	1.039	0.963	0.992	0.970487
254	CEP19_KAN497-16_4.tif:0014-0911	0.587	271.446	0	1261	117.533	93.32	0.92	159.335	15201	1.143	0.875	1	0.910584
255	CEP19_KAN497-16_4.tif:0015-0924	0.514	205.633	0	851	108.677	94.651	0.935	105.615	10076	1	1	1	0.603581
256	CEP19_KAN497-16_4.tif:0016-0942	0.65	238.242	0	1095	106.783	96.443	0.96	154.828	14771	1.081	0.925	0.984	0.884826
257	CEP19_KAN497-16_5.tif:0001-0040	0.891	327.941	0	1595	134.593	4.108	0.929	292.182	27875	1.185	0.844	0.977	1.66979
258	CEP19_KAN497-16_5.tif:0002-0042	0.734	217.4	0	634	77.144	4.29	0.947	159.513	15218	1.125	0.889	0.986	0.911602
259	CEP19_KAN497-16_5.tif:0003-0048	0.514	186.204	0	639	69.056	4.965	0.935	95.636	9124	1	1	1	0.546554
260	CEP19_KAN497-16_5.tif:0004-0122	0.713	240.265	0	1074	67.725	12.49	0.919	171.253	16338	1.203	0.831	0.971	0.978693
261	CEP19_KAN497-16_5.tif:0005-0220	0.734	254.8	0	1077	0.973	22.524	0.947	186.954	17836	1.146	0.873	0.986	1.06843
262	CEP19_KAN497-16_5.tif:0006-0326	0.514	213.143	16	563	50.935	33.427	0.935	109.473	10444	1	1	1	0.625626
263	CEP19_KAN497-16_5.tif:0007-0328	0.912	362.644	0	1958	82.863	33.593	0.889	330.703	31550	1.149	0.87	0.983	1.88994
264	CEP19_KAN497-16_5.tif:0008-0428	0.587	265.982	18	780	99.975	43.819	0.92	156.127	14895	1.143	0.875	1	0.892253
265	CEP19_KAN497-16_5.tif:0009-0522	0.807	262.091	0	1123	137.763	53.503	0.951	211.534	20181	1.123	0.89	0.981	1.2089
266	CEP19_KAN497-16_5.tif:0010-0531	0.849	141.901	0	516	33.036	54.38	0.816	120.478	11494	1.422	0.703	0.9	0.688524
267	CEP19_KAN497-16_5.tif:0011-0718	0.514	195.592	41	437	120.144	73.561	0.935	100.458	9584	1	1	1	0.574109
268	CEP19_KAN497-16_5.tif:0012-0839	0.734	259.986	9	1116	99.832	85.959	0.911	190.759	18199	1.149	0.87	0.986	1.09017
269	CEP19_KAN497-16_6.tif:0001-0071	0.587	226.304	2	677	11.108	7.269	0.92	132.837	12673	1.143	0.875	1	0.759149
270	CEP19_KAN497-16_6.tif:0002-0106	0.744	227.676	14	626	54.922	10.857	0.924	169.439	16165	1.13	0.885	0.993	0.96833
271	CEP19_KAN497-16_6.tif:0003-0167	0.514	213.429	3	787	22.063	17.149	0.935	109.619	10458	1	1	1	0.626464
272	CEP19_KAN497-16_6.tif:0004-0182	0.587	209.75	0	750	35.373	18.633	0.92	123.12	11746	1.143	0.875	1	0.703619
273	CEP19_KAN497-16_6.tif:0005-0230	0.587	210.357	15	804	13.258	23.548	0.92	123.476	11780	1.143	0.875	1	0.705656
274	CEP19_KAN497-16_6.tif:0006-0263	0.514	190.735	0	781	40.492	26.977	0.935	97.963	9346	1	1	1	0.559852
275	CEP19_KAN497-16_6.tif:0007-0265	0.514	157.796	0	898	45.918	27.182	0.935	81.046	7732	1	1	1	0.463169
276	CEP19_KAN497-16_6.tif:0008-0271	0.671	275.906	0	1299	43.614	27.745	0.914	185.089	17658	1	1	1	1.05777
277	CEP19_KAN497-16_6.tif:0009-0374	0.807	276	0	1225	107.868	38.351	0.951	222.76	21252	1.123	0.89	0.981	1.27306
278	CEP19_KAN497-16_6.tif:0010-0428	0.818	248.936	0	1164	9.829	43.819	0.929	203.526	19417	1.259	0.794	0.987	1.16313
279	CEP19_KAN497-16_6.tif:0011-0507	0.514	225.673	19	906	24.725	51.958	0.935	115.908	11058	1	1	1	0.662406
280	CEP19_KAN497-16_6.tif:0012-0561	1.027	229.643	0	745	117.482	57.436	0.722	235.894	22505	2.06	0.485	0.875	1.34811
281	CEP19_KAN497-16_6.tif:0013-0773	0.587	204.893	0	636	46.02	79.14	0.92	120.269	11474	1.143	0.875	1	0.687326
282	CEP19_KAN497-16_6.tif:0014-0919	1.09	221.462	0	1223	109.215	94.135	0.788	241.418	23032	1.447	0.691	0.881	1.37968
										16797.2				1.0062
	RAB34 KO
283	CEP19_KAN497-17_1.tif:0001-0146	0.828	262.823	0	878	100.794	14.999	0.941	217.635	20763	1.064	0.94	0.988	1.24376
284	CEP19_KAN497-17_1.tif:0002-0458	1.006	297.99	0	1353	121.832	46.9	0.936	299.855	28607	1.049	0.953	0.98	1.71364
285	CEP19_KAN497-17_1.tif:0003-0564	0.912	265.333	0	1024	67.115	57.748	0.951	241.963	23084	1.114	0.897	0.983	1.3828
286	CEP19_KAN497-17_1.tif:0004-0602	0.514	138.531	1	842	72.742	61.685	0.935	71.151	6788	1	1	1	0.406621
287	CEP19_KAN497-17_1.tif:0005-0715	0.734	205.229	0	877	72.383	73.254	0.947	150.582	14366	1.146	0.873	0.986	0.860565
288	CEP19_KAN497-17_1.tif:0006-0810	0.587	224.125	5	728	25.339	82.929	0.92	131.558	12551	1.143	0.875	1	0.751841
289	CEP19_KAN497-17_1.tif:0007-0917	1.006	298.417	0	1014	133.504	93.893	0.936	300.284	28648	1.049	0.953	0.98	1.7161
290	CEP19_KAN497-17_1.tif:0008-0968	0.514	159.918	0	732	13.975	99.156	0.935	82.136	7836	1	1	1	0.469399
291	CEP19_KAN497-17_1.tif:0009-0981	0.514	174.082	2	671	21.961	100.487	0.935	89.41	8530	1	1	1	0.510972
292	CEP19_KAN497-17_1.tif:0010-0997	0.901	244.395	0	948	75.394	102.073	0.94	220.308	21018	1.13	0.885	0.977	1.25904
293	CEP19_KAN497-17_2.tif:0001-0126	0.65	219.387	23	572	40.645	12.9	0.96	142.574	13602	1.081	0.925	0.984	0.814799
294	CEP19_KAN497-17_2.tif:0002-0326	0.514	227.265	2	865	134.068	33.427	0.935	116.726	11136	1	1	1	0.667079
295	CEP19_KAN497-17_2.tif:0003-0346	0.922	248.682	0	903	67.07	35.475	0.93	229.385	21884	1.11	0.901	0.989	1.31091
296	CEP19_KAN497-17_2.tif:0004-0381	0.734	230.2	0	846	124.854	39.007	0.947	168.905	16114	1.146	0.873	0.986	0.965275
297	CEP19_KAN497-17_2.tif:0005-0576	0.514	235.245	9	654	32.711	59.023	0.935	120.824	11527	1	1	1	0.690501
298	CEP19_KAN497-17_2.tif:0006-0639	0.744	234.408	0	794	74.579	65.426	0.924	174.45	16643	1.13	0.885	0.993	0.996964
299	CEP19_KAN497-17_2.tif:0007-0794	0.66	241.698	0	877	56.258	81.342	0.9	159.607	15227	1.286	0.778	1	0.912141
300	CEP19_KAN497-17_2.tif:0008-0935	0.807	259.364	11	1006	109.431	95.712	0.885	209.333	19971	1.286	0.778	0.981	1.19632
301	CEP19_KAN497-17_3.tif:0001-0074	0.744	269.507	3	1009	55.291	7.622	0.924	200.57	19135	1.13	0.885	0.993	1.14624
302	CEP19_KAN497-17_3.tif:0002-0273	0.755	303	0	1043	49.604	27.95	0.903	228.672	21816	1.125	0.889	1	1.30684
303	CEP19_KAN497-17_3.tif:0003-0316	0.744	255.817	8	940	104.793	32.347	0.924	190.382	18163	1.13	0.885	0.993	1.08802
304	CEP19_KAN497-17_3.tif:0004-0487	0.671	228.875	0	674	133.402	49.86	0.914	153.538	14648	1	1	1	0.877457
305	CEP19_KAN497-17_3.tif:0005-0646	0.744	244.831	0	589	43.609	66.195	0.924	182.206	17383	1.13	0.885	0.993	1.04129
306	CEP19_KAN497-17_3.tif:0006-0670	0.66	248.794	20	631	102.33	68.646	0.9	164.293	15674	1.286	0.778	1	0.938918
307	CEP19_KAN497-17_3.tif:0007-0797	0.587	245.464	25	587	53.904	81.598	0.92	144.084	13746	1.143	0.875	1	0.823425
308	CEP19_KAN497-17_3.tif:0008-0865	0.66	205.27	10	637	11.984	88.565	0.937	135.551	12932	1.039	0.963	0.992	0.774664
309	CEP19_KAN497-17_4.tif:0001-0023	0.587	184.143	0	749	98.286	2.406	0.92	108.089	10312	1.143	0.875	1	0.617719
310	CEP19_KAN497-17_4.tif:0002-0064	0.734	285.843	3	984	44.28	6.552	0.878	209.732	20009	1.429	0.7	1	1.1986
311	CEP19_KAN497-17_4.tif:0003-0172	1.153	284.773	0	1102	112.989	17.657	0.98	328.344	31325	1.058	0.945	0.965	1.87646
312	CEP19_KAN497-17_4.tif:0004-0280	0.66	225.651	5	618	40.799	28.718	0.9	149.01	14216	1.286	0.778	1	0.851579
313	CEP19_KAN497-17_4.tif:0005-0449	0.818	260.603	0	1151	75.66	45.969	0.929	213.065	20327	1.259	0.794	0.987	1.21765
314	CEP19_KAN497-17_4.tif:0006-0456	0.996	295.947	0	1323	110.157	46.682	0.957	294.697	28115	1.023	0.978	0.974	1.68417
315	CEP19_KAN497-17_4.tif:0007-0721	0.514	216.347	44	570	26.67	73.868	0.935	111.118	10601	1	1	1	0.63503
316	CEP19_KAN497-17_4.tif:0008-0736	0.755	234.861	4	713	117.38	75.352	0.903	177.248	16910	1.125	0.889	1	1.01296
317	CEP19_KAN497-17_4.tif:0009-0791	0.514	244.776	0	1246	123.113	81.035	0.935	125.719	11994	1	1	1	0.718475
318	CEP19_KAN497-17_4.tif:0010-0817	0.514	233.367	0	1192	101.92	83.696	0.935	119.86	11435	1	1	1	0.684989
319	CEP19_KAN497-17_4.tif:0011-0845	0.587	275.518	16	937	89.942	86.512	0.92	161.725	15429	1.143	0.875	1	0.924242
320	CEP19_KAN497-17_4.tif:0012-0890	0.514	192.347	1	757	121.27	91.17	0.935	98.792	9425	1	1	1	0.564585
321	CEP19_KAN497-17_4.tif:0013-0948	0.912	323.126	0	1481	84.919	97.053	0.889	294.666	28112	1.375	0.727	0.994	1.68399
322	CEP19_KAN497-17_5.tif:0001-0007	0.66	232.587	0	973	138.88	0.768	0.9	153.591	14653	1.286	0.778	1	0.877757
323	CEP19_KAN497-17_5.tif:0002-0136	0.734	245.914	0	746	98.378	13.975	0.947	180.435	17214	1.125	0.889	0.986	1.03117
324	CEP19_KAN497-17_5.tif:0003-0160	0.828	243.013	0	1014	66.794	16.443	0.941	201.231	19198	1.058	0.946	0.988	1.15002
325	CEP19_KAN497-17_5.tif:0004-0235	0.514	206.531	11	407	139.699	24.111	0.935	106.076	10120	1	1	1	0.606217
326	CEP19_KAN497-17_5.tif:0005-0288	0.723	265.638	0	831	26.265	29.481	0.933	192.122	18329	1.172	0.853	0.979	1.09796
327	CEP19_KAN497-17_5.tif:0006-0558	0.828	194.38	0	474	98.019	57.18	0.941	160.959	15356	1.001	0.999	0.988	0.919869
328	CEP19_KAN497-17_5.tif:0007-0570	0.975	282.753	0	1135	139.101	58.401	0.937	275.631	26296	1.254	0.797	0.974	1.57521
329	CEP19_KAN497-17_5.tif:0008-0659	0.587	197.304	0	584	9.726	67.52	0.92	115.814	11049	1.143	0.875	1	0.661867
330	CEP19_KAN497-17_5.tif:0009-0727	0.734	216.771	14	707	53.914	74.421	0.911	159.052	15174	1.149	0.87	0.986	0.908966
331	CEP19_KAN497-17_5.tif:0010-1029	0.514	232.204	19	604	118.199	105.401	0.935	119.263	11378	1	1	1	0.681575
332	CEP19_KAN497-17_6.tif:0001-0012	0.587	288.732	0	1111	91.017	1.28	0.92	169.481	16169	1.143	0.875	1	0.96857
333	CEP19_KAN497-17_6.tif:0002-0053	0.514	196.694	4	845	87.996	5.477	0.935	101.024	9638	1	1	1	0.577344
334	CEP19_KAN497-17_6.tif:0003-0061	0.66	221.365	0	1013	89.578	6.24	0.937	146.18	13946	1.039	0.963	0.992	0.835406
335	CEP19_KAN497-17_6.tif:0004-0068	0.65	229.79	25	638	13.31	6.962	0.96	149.335	14247	1.081	0.925	0.984	0.853436
336	CEP19_KAN497-17_6.tif:0005-0076	0.514	199.143	19	672	129.358	7.832	0.935	102.282	9758	1	1	1	0.584532
337	CEP19_KAN497-17_6.tif:0006-0163	0.514	207.612	17	752	137.446	16.739	0.935	106.632	10173	1	1	1	0.609392
338	CEP19_KAN497-17_6.tif:0007-0232	0.514	207.429	3	964	69.568	23.804	0.935	106.538	10164	1	1	1	0.608853
339	CEP19_KAN497-17_6.tif:0008-0328	0.922	250.102	0	908	68.032	33.57	0.93	230.695	22009	1.11	0.901	0.989	1.3184
340	CEP19_KAN497-17_6.tif:0009-0387	0.912	244.402	0	950	115.02	39.616	0.951	222.876	21263	1.114	0.897	0.983	1.27372
341	CEP19_KAN497-17_6.tif:0010-0437	0.828	262.089	15	999	74.64	44.746	0.908	217.027	20705	1.252	0.799	0.994	1.24029
342	CEP19_KAN497-17_6.tif:0011-0500	0.922	271.386	0	901	137.642	51.19	0.93	250.328	23882	1.111	0.9	0.989	1.4306
343	CEP19_KAN497-17_6.tif:0012-0645	0.807	195.792	0	691	1.587	66.087	0.987	158.025	15076	1	1	0.975	0.903096
344	CEP19_KAN497-17_6.tif:0013-0657	0.514	185.776	0	521	88.304	67.315	0.935	95.416	9103	1	1	1	0.545296
345	CEP19_KAN497-17_6.tif:0014-0769	0.514	267.51	0	945	14.077	78.782	0.935	137.396	13108	1	1	1	0.785207
346	CEP19_KAN497-17_6.tif:0015-0782	0.671	203.656	19	454	105.452	80.062	0.914	136.621	13034	1	1	1	0.780774
347	CEP19_KAN497-17_6.tif:0016-0982	0.901	217.919	0	747	92.092	100.538	0.974	196.441	18741	1.11	0.901	0.977	1.12264
										16304.4				0.97668
	C3ORF14 KO
348	CEP19_KAN497-18_1.tif:0001-0009	0.514	173.857	0	896	51.549	0.973	0.935	89.295	8519	1	1	1	0.510313
349	CEP19_KAN497-18_1.tif:0002-0170	0.514	227.551	0	798	114.411	17.456	0.935	116.873	11150	1	1	1	0.667917
350	CEP19_KAN497-18_1.tif:0003-0178	1.09	192.74	0	1108	110.469	18.275	0.724	210.109	20045	2.184	0.458	0.929	1.20075
351	CEP19_KAN497-18_1.tif:0004-0174	0.514	248.347	0	1154	119.939	17.865	0.935	127.554	12169	1	1	1	0.728958
352	CEP19_KAN497-18_1.tif:0005-0185	0.66	280.603	0	1306	111.999	18.935	0.937	185.298	17678	1.039	0.963	0.992	1.05896
353	CEP19_KAN497-18_1.tif:0006-0201	0.891	326.282	0	1409	59.948	20.584	0.929	290.704	27734	1.186	0.843	0.977	1.66135
354	CEP19_KAN497-18_1.tif:0007-0200	0.587	255.839	0	808	33.99	20.527	0.92	150.174	14327	1.143	0.875	1	0.858229
355	CEP19_KAN497-18_1.tif:0008-0380	0.514	162.633	0	1011	108.165	38.956	0.935	83.53	7969	1	1	1	0.477366
356	CEP19_KAN497-18_1.tif:0009-0487	0.818	286.256	0	1123	74.497	49.925	0.929	234.039	22328	1.086	0.921	0.987	1.33751
357	CEP19_KAN497-18_1.tif:0010-0602	0.419	259.3	0	913	0.563	61.633	0.898	108.718	10372	1.6	0.625	1	0.621313
358	CEP19_KAN497-18_1.tif:0011-0639	0.891	298.012	0	1384	130.907	65.426	0.962	265.516	25331	1.139	0.878	0.977	1.5174
359	CEP19_KAN497-18_1.tif:0012-0680	0.514	221.347	0	608	34.758	69.67	0.935	113.686	10846	1	1	1	0.649707
360	CEP19_KAN497-18_1.tif:0013-0777	0.587	248.857	0	912	127.72	79.55	0.92	146.075	13936	1.143	0.875	1	0.834807
361	CEP19_KAN497-18_1.tif:0014-0782	0.514	203.122	19	748	130.689	80.113	0.935	104.326	9953	1	1	1	0.596213
362	CEP19_KAN497-18_1.tif:0015-0842	0.514	139.163	0	735	141.235	86.256	0.935	71.476	6819	1	1	1	0.408478
363	CEP19_KAN497-18_1.tif:0016-0860	0.514	196.653	0	1186	122.601	88.099	0.935	101.003	9636	1	1	1	0.577224
364	CEP19_KAN497-18_1.tif:0017-0936	0.807	223.883	0	849	130.894	95.88	0.917	180.697	17239	1.123	0.891	0.975	1.03267
365	CEP19_KAN497-18_1.tif:0018-1003	0.964	246.696	0	1018	8.387	102.688	0.959	237.896	22696	1.147	0.872	0.968	1.35956
366	CEP19_KAN497-18_1.tif:0019-1019	0.66	241.365	10	806	65.473	104.377	0.9	159.387	15206	1.286	0.778	1	0.910883
367	CEP19_KAN497-18_2.tif:0001-0210	0.66	230.27	2	534	22.939	21.494	0.937	152.06	14507	1.039	0.963	0.992	0.869011
368	CEP19_KAN497-18_2.tif:0002-0255	0.734	213.929	0	651	129.932	26.158	0.947	156.966	14975	1.125	0.889	0.986	0.897046
369	CEP19_KAN497-18_2.tif:0003-0286	0.587	217.179	9	644	109.906	29.281	0.92	127.48	12162	1.143	0.875	1	0.728539
370	CEP19_KAN497-18_2.tif:0004-0306	0.514	209.245	0	907	90.658	31.38	0.935	107.471	10253	1	1	1	0.614184
371	CEP19_KAN497-18_2.tif:0005-0404	0.88	228.44	0	879	103.251	41.362	0.951	201.136	19189	1.207	0.828	0.977	1.14948
372	CEP19_KAN497-18_2.tif:0006-0423	0.66	260.667	0	923	91.523	43.301	0.937	172.133	16422	1.039	0.963	0.992	0.983725
373	CEP19_KAN497-18_2.tif:0007-0578	0.734	200.714	0	631	32.035	59.227	0.947	147.27	14050	1.125	0.889	0.986	0.841636
374	CEP19_KAN497-18_2.tif:0008-0795	0.86	201.293	0	782	104.284	81.385	0.928	173.014	16506	1.262	0.792	0.965	0.988757
375	CEP19_KAN497-18_2.tif:0009-0798	0.744	250.69	0	748	134.79	81.705	0.924	186.567	17799	1.13	0.885	0.993	1.06621
376	CEP19_KAN497-18_2.tif:0010-1034	0.545	317.173	46	979	67.111	105.872	0.932	172.877	16493	1.494	0.669	0.981	0.987978
377	CEP19_KAN497-18_3.tif:0001-0074	0.514	262.184	0	1022	95.777	7.627	0.935	134.66	12847	1	1	1	0.769572
378	CEP19_KAN497-18_3.tif:0002-0187	0.891	232.2	0	974	98.401	19.183	0.929	206.88	19737	1.185	0.844	0.977	1.1823
379	CEP19_KAN497-18_3.tif:0003-0379	0.744	230.817	0	722	37.926	38.797	0.924	171.777	16388	1.13	0.885	0.993	0.981688
380	CEP19_KAN497-18_3.tif:0004-0479	0.587	243.25	14	766	9.88	49.04	0.92	142.784	13622	1.143	0.875	1	0.815997
381	CEP19_KAN497-18_3.tif:0005-0520	0.901	287.581	0	1343	94.669	53.229	0.94	259.237	24732	1.123	0.891	0.983	1.48152
382	CEP19_KAN497-18_3.tif:0006-0589	0.744	259.549	4	927	51.043	60.307	0.924	193.16	18428	1.13	0.885	0.993	1.10389
383	CEP19_KAN497-18_3.tif:0007-0639	0.964	230.793	0	952	8.498	65.421	0.992	222.561	21233	1.096	0.912	0.968	1.27192
384	CEP19_KAN497-18_3.tif:0008-0673	0.723	208.652	0	752	31.231	68.958	0.933	150.907	14397	1.172	0.853	0.979	0.862422
385	CEP19_KAN497-18_3.tif:0009-0851	0.65	207.742	0	788	48.426	87.126	0.96	135.006	12880	1.081	0.925	0.984	0.771549
386	CEP19_KAN497-18_3.tif:0010-0925	0.514	258.735	8	812	110.725	94.754	0.935	132.889	12678	1	1	1	0.759449
387	CEP19_KAN497-18_3.tif:0011-0958	1.174	468.107	0	2430	104.69	98.128	0.967	549.543	52428	1.021	0.98	0.966	3.14059
388	CEP19_KAN497-18_3.tif:0012-0998	0.734	282.971	0	1099	139.351	102.217	0.911	207.625	19808	1.149	0.87	0.986	1.18656
389	CEP19_KAN497-18_3.tif:0013-1029	0.514	200.327	7	603	113.592	105.401	0.935	102.89	9816	1	1	1	0.588007
390	CEP19_KAN497-18_4.tif:0001-0037	0.65	246.258	0	948	100.538	3.788	0.96	160.037	15268	1.081	0.925	0.984	0.914597
391	CEP19_KAN497-18_4.tif:0002-0056	0.818	216.615	0	520	120.958	5.779	0.963	177.101	16896	1.032	0.969	0.981	1.01212
392	CEP19_KAN497-18_4.tif:0003-0074	0.514	283.796	11	1560	65.268	7.627	0.935	145.761	13906	1	1	1	0.83301
393	CEP19_KAN497-18_4.tif:0004-0080	0.744	242.648	0	867	109.4	8.185	0.924	180.581	17228	1.13	0.885	0.993	1.03201
394	CEP19_KAN497-18_4.tif:0005-0203	1.017	278.237	0	1059	55.746	20.835	0.916	282.895	26989	1.229	0.814	0.99	1.61672
395	CEP19_KAN497-18_4.tif:0006-0241	0.514	173.265	10	601	110.418	24.725	0.935	88.991	8490	1	1	1	0.508576
396	CEP19_KAN497-18_4.tif:0007-0253	0.514	216.898	11	708	43.973	25.954	0.935	111.401	10628	1	1	1	0.636648
397	CEP19_KAN497-18_4.tif:0008-0281	0.66	199.476	3	631	117.528	28.763	0.937	131.726	12567	1.039	0.963	0.992	0.7528
398	CEP19_KAN497-18_4.tif:0009-0289	0.65	241.645	0	885	47.914	29.588	0.96	157.039	14982	1.081	0.925	0.984	0.897465
399	CEP19_KAN497-18_4.tif:0010-0318	0.514	205.653	24	782	43.461	32.608	0.935	105.626	10077	1	1	1	0.603641
400	CEP19_KAN497-18_4.tif:0011-0410	0.65	218.161	0	873	25.083	41.976	0.96	141.778	13526	1.081	0.925	0.984	0.810246
401	CEP19_KAN497-18_4.tif:0012-0486	0.262	4.84	0	12	96.904	49.808	1	1.268	121	1	1	1	0.00724825
402	CEP19_KAN497-18_4.tif:0013-0490	0.514	208.898	24	591	22.677	50.218	0.935	107.292	10236	1	1	1	0.613166
403	CEP19_KAN497-18_4.tif:0014-0622	0.723	335.362	0	1174	141.853	63.688	0.898	242.55	23140	1.429	0.7	0.993	1.38615
404	CEP19_KAN497-18_4.tif:0015-0689	0.514	220.98	5	486	114.411	70.592	0.935	113.498	10828	1	1	1	0.648628
405	CEP19_KAN497-18_4.tif:0016-0696	0.587	239.554	0	902	9.982	71.257	0.92	140.614	13415	1.143	0.875	1	0.803597
406	CEP19_KAN497-18_4.tif:0017-0774	0.65	215.887	0	649	88.764	79.243	0.96	140.3	13385	1.081	0.925	0.984	0.8018
407	CEP19_KAN497-18_4.tif:0018-0905	0.514	243.714	0	714	11.927	92.706	0.935	125.174	11942	1	1	1	0.71536
408	CEP19_KAN497-18_4.tif:0019-0952	0.807	258.935	0	1141	70.396	97.527	0.951	208.987	19938	1.123	0.89	0.981	1.19434
409	CEP19_KAN497-18_5.tif:0001-0122	0.755	292.181	0	1363	115.025	12.49	0.903	220.507	21037	1.125	0.889	1	1.26018
410	CEP19_KAN497-18_5.tif:0002-0140	0.807	292.481	0	1266	11.834	14.394	0.951	236.062	22521	1.123	0.89	0.981	1.34907
411	CEP19_KAN497-18_5.tif:0003-0173	0.912	255.069	0	761	73.983	17.707	0.919	232.603	22191	1.107	0.903	0.983	1.3293
412	CEP19_KAN497-18_5.tif:0004-0437	0.996	264.937	0	979	42.846	44.792	0.957	263.818	25169	1.219	0.82	0.979	1.5077
413	CEP19_KAN497-18_5.tif:0005-0483	0.66	212.714	0	655	119.894	49.456	0.937	140.467	13401	1.039	0.963	0.992	0.802759
414	CEP19_KAN497-18_5.tif:0006-0485	0.912	254.345	0	953	87.439	49.701	0.951	231.943	22128	1.114	0.897	0.983	1.32553
415	CEP19_KAN497-18_5.tif:0007-0489	0.66	279.746	0	1083	94.697	50.07	0.937	184.732	17624	1.039	0.963	0.992	1.05573
416	CEP19_KAN497-18_5.tif:0008-0554	0.66	193.841	0	530	6.046	56.725	0.937	128.004	12212	1.039	0.963	0.992	0.731534
417	CEP19_KAN497-18_5.tif:0009-0777	0.514	232.041	25	752	104.582	79.601	0.935	119.179	11370	1	1	1	0.681096
418	CEP19_KAN497-18_5.tif:0010-0836	0.514	198.163	17	675	95.265	85.642	0.935	101.779	9710	1	1	1	0.581657
419	CEP19_KAN497-18_5.tif:0011-0885	0.66	188.317	0	646	107.096	90.613	0.937	124.357	11864	1.039	0.963	0.992	0.710688
420	CEP19_KAN497-18_5.tif:0012-0924	0.514	232.061	40	457	76.018	94.651	0.935	119.189	11371	1	1	1	0.681156
421	CEP19_KAN497-18_5.tif:0013-0939	0.514	235.102	16	547	99.77	96.187	0.935	120.751	11520	1	1	1	0.690081
422	CEP19_KAN497-18_6.tif:0001-0026	0.828	294.595	0	1269	74.585	2.713	0.941	243.944	23273	1.064	0.94	0.988	1.39412
423	CEP19_KAN497-18_6.tif:0002-0118	0.797	244.211	0	989	128.943	12.128	0.939	194.543	18560	1.155	0.866	0.974	1.1118
424	CEP19_KAN497-18_6.tif:0003-0126	0.514	195.857	4	1138	99.463	12.951	0.935	100.594	9597	1	1	1	0.574888
425	CEP19_KAN497-18_6.tif:0004-0172	0.807	253.13	0	1134	45.313	17.651	0.951	204.302	19491	1.123	0.89	0.981	1.16757
426	CEP19_KAN497-18_6.tif:0005-0232	0.514	217.755	0	1275	91.989	23.804	0.935	111.841	10670	1	1	1	0.639164
427	CEP19_KAN497-18_6.tif:0006-0384	0.901	356.826	0	2080	87.075	39.314	0.974	321.657	30687	1.11	0.901	0.977	1.83824
428	CEP19_KAN497-18_6.tif:0007-0393	0.88	268.702	0	1001	119.163	40.295	0.951	236.586	22571	1.214	0.824	0.971	1.35207
429	CEP19_KAN497-18_6.tif:0008-0520	0.514	236.776	17	710	30.151	53.289	0.935	121.611	11602	1	1	1	0.694993
430	CEP19_KAN497-18_6.tif:0009-0837	0.723	185.304	0	546	84.879	85.74	0.933	134.021	12786	1.172	0.853	0.979	0.765918
431	CEP19_KAN497-18_6.tif:0010-0873	0.587	264.911	0	1011	67.827	89.379	0.92	155.498	14835	1.143	0.875	1	0.888659
										15893.5				0.952067

## Sheet: IF condition
Exp. number	Cell line	Culture condition	Fixation condition	rabbit-Alexa488	mouse IgG1-Alexa568	mouse IgG2b-Alexa647	Nuclear stain	Date	Replicate
KAN497-13	RPE-BFP-Cas9 pMCB306 (pool)	Serum starved for 24 hours	Fixed in 4% PFA at RT for 15 minutes.	CEP19,CA5883, third bleed, 1:500	CEP170, Invitrogen, 41-3200, 1:1000	Ac-Tub, 6B-11, SIGMA, 1:2000	DAPI	2019-05-20	No.3	CEP19: box4, E9
KAN497-14	RPE-BFP-Cas9 CEP89KO (pool)	Serum starved for 24 hours	Fixed in 4% PFA at RT for 15 minutes.	CEP19,CA5883, third bleed, 1:500	CEP170, Invitrogen, 41-3200, 1:1000	Ac-Tub, 6B-11, SIGMA, 1:2000	DAPI	2019-05-20	No.3
KAN497-15	RPE-BFP-Cas9 NCS1KO (pool)	Serum starved for 24 hours	Fixed in 4% PFA at RT for 15 minutes.	CEP19,CA5883, third bleed, 1:500	CEP170, Invitrogen, 41-3200, 1:1000	Ac-Tub, 6B-11, SIGMA, 1:2000	DAPI	2019-05-20	No.3
KAN497-16	RPE-BFP-Cas9 C3orf14KO (pool)	Serum starved for 24 hours	Fixed in 4% PFA at RT for 15 minutes.	CEP19,CA5883, third bleed, 1:500	CEP170, Invitrogen, 41-3200, 1:1000	Ac-Tub, 6B-11, SIGMA, 1:2000	DAPI	2019-05-20	No.3
KAN497-17	RPE-BFP-Cas9 Rab34KO (pool)	Serum starved for 24 hours	Fixed in 4% PFA at RT for 15 minutes.	CEP19,CA5883, third bleed, 1:500	CEP170, Invitrogen, 41-3200, 1:1000	Ac-Tub, 6B-11, SIGMA, 1:2000	DAPI	2019-05-20	No.3
KAN497-18	RPE-BFP-Cas9 Myo5AKO (pool)	Serum starved for 24 hours	Fixed in 4% PFA at RT for 15 minutes.	CEP19,CA5883, third bleed, 1:500	CEP170, Invitrogen, 41-3200, 1:1000	Ac-Tub, 6B-11, SIGMA, 1:2000	DAPI	2019-05-20	No.3
