# Supplementary material for: A hierarchical pathway for assembly of the distal appendages that organize primary cilia
Source: eLife. 2025 Jan 30;14:e85999. doi: 10.7554/eLife.85999 (PMC11984956; doi:10.7554/eLife.85999)
Supplement: Figure 4—source data 6. [file elife-85999-fig4-data6.xlsx]

## Sheet: Raw data
	Label	Area	Mean	Min	Max	X	Y	Circ	IntDen	RawIntDen	AR	Round	Solidity
		RPE-BFP-Cas9 none
130	IFT88_KAN310-4_1.tif:0001-0118	2.054	239.352	0	2133	70.463	12.144	0.87	491.735	46913	1.464	0.683	0.936	1.67207
131	IFT88_KAN310-4_1.tif:0002-0167	2.013	168.51	0	1673	97.68	17.138	0.826	339.13	32354	1.237	0.808	0.887	1.15316
132	IFT88_KAN310-4_1.tif:0003-0180	1.111	63.953	0	278	47.594	18.487	0.702	71.057	6779	2.321	0.431	0.858	0.241617
133	IFT88_KAN310-4_1.tif:0004-0203	1.237	61.839	0	374	38.044	20.791	0.803	76.486	7297	1.825	0.548	0.908	0.260079
134	IFT88_KAN310-4_1.tif:0005-0393	0.912	155.333	0	614	135.321	40.288	0.8	141.652	13514	1.78	0.562	0.87	0.481665
135	IFT88_KAN310-4_1.tif:0006-0413	2.285	266.472	0	2479	49.134	42.339	0.837	608.902	58091	1.571	0.637	0.934	2.07047
136	IFT88_KAN310-4_1.tif:0007-0413	1.855	263.311	0	2179	24.472	42.369	0.876	488.518	46606	1.51	0.662	0.947	1.66113
137	IFT88_KAN310-4_1.tif:0008-0462	2.013	255.464	0	2090	92.445	47.274	0.841	514.125	49049	1.538	0.65	0.948	1.7482
138	IFT88_KAN310-4_1.tif:0009-0539	1.698	212.08	0	1605	41.084	55.228	0.9	360.125	34357	1.273	0.786	0.961	1.22455
139	IFT88_KAN310-4_1.tif:0010-0541	2.159	60.165	0	454	37.348	55.432	0.947	129.912	12394	1.214	0.824	0.945	0.441746
140	IFT88_KAN310-4_1.tif:0011-0588	1.771	283.45	0	2125	57.38	60.228	0.865	502.112	47903	1.583	0.632	0.96	1.70735
141	IFT88_KAN310-4_1.tif:0012-0655	0.985	196.489	0	833	7.062	67.1	0.876	193.6	18470	1.288	0.776	0.922	0.658306
142	IFT88_KAN310-4_1.tif:0013-0657	1.017	43.629	0	301	16.32	67.256	0.679	44.359	4232	2.24	0.446	0.819	0.150837
143	IFT88_KAN310-4_1.tif:0014-0669	1.195	120.57	0	427	76.393	68.531	0.916	144.073	13745	1.328	0.753	0.95	0.489898
144	IFT88_KAN310-4_1.tif:0015-0682	1.006	56.333	0	195	52.47	69.85	0.749	56.686	5408	1.751	0.571	0.869	0.192751
145	IFT88_KAN310-4_1.tif:0016-0714	1.992	150.011	0	1071	58.929	73.12	0.79	298.754	28502	1.899	0.526	0.938	1.01587
146	IFT88_KAN310-4_1.tif:0017-0720	1.667	221.233	0	1582	99.912	73.738	0.896	368.71	35176	1.195	0.837	0.933	1.25374
147	IFT88_KAN310-4_1.tif:0018-0744	0.901	395.442	0	1494	19.555	76.231	0.94	356.467	34008	1.117	0.895	0.977	1.21211
148	IFT88_KAN310-4_1.tif:0019-0747	1.52	69.345	0	321	61.456	76.559	0.925	105.395	10055	1.236	0.809	0.948	0.358379
149	IFT88_KAN310-4_1.tif:0020-0852	0.87	26.554	0	152	16.274	87.169	0.704	23.102	2204	2.278	0.439	0.922	0.0785548
150	IFT88_KAN310-4_1.tif:0021-0880	1.184	84	0	366	32.558	90.159	0.964	99.494	9492	1.106	0.904	0.942	0.338313
151	IFT88_KAN310-4_1.tif:0022-0915	1.646	161.42	0	1213	85.27	93.657	0.894	265.642	25343	1.108	0.902	0.943	0.903273
152	IFT88_KAN310-4_1.tif:0023-0928	1.971	224.697	0	1705	48.47	95.036	0.88	442.785	42243	1.236	0.809	0.935	1.50562
153	IFT88_KAN310-4_2.tif:0001-0055	1.174	136.357	0	795	70.029	5.629	0.938	160.079	15272	1.197	0.835	0.97	0.544323
154	IFT88_KAN310-4_2.tif:0002-0075	1.226	129.658	0	878	99.401	7.733	0.968	159.01	15170	1.104	0.906	0.951	0.540688
155	IFT88_KAN310-4_2.tif:0003-0101	1.646	262.185	0	2223	39.529	10.333	0.851	431.465	41163	1.486	0.673	0.954	1.46713
156	IFT88_KAN310-4_2.tif:0004-0213	1.457	34.748	0	171	50.54	21.85	0.887	50.627	4830	1.422	0.703	0.939	0.17215
157	IFT88_KAN310-4_2.tif:0005-0245	1.226	118.872	0	1024	23.408	25.135	0.743	145.782	13908	2.418	0.414	0.992	0.495708
158	IFT88_KAN310-4_2.tif:0006-0269	2.096	267.62	0	2022	23.259	27.484	0.8	561.031	53524	1.851	0.54	0.92	1.9077
159	IFT88_KAN310-4_2.tif:0007-0322	1.74	299.512	0	2549	55.096	33.04	0.922	521.148	49719	1.132	0.883	0.965	1.77208
160	IFT88_KAN310-4_2.tif:0008-0388	1.405	227.754	0	1532	5.215	39.768	0.912	319.896	30519	1.301	0.769	0.94	1.08776
161	IFT88_KAN310-4_2.tif:0009-0456	1.111	90.613	0	438	87.371	46.678	0.659	100.678	9605	2.473	0.404	0.845	0.342341
162	IFT88_KAN310-4_2.tif:0010-0462	0.996	214.6	0	766	123.051	47.323	0.957	213.694	20387	1.064	0.94	0.979	0.726632
163	IFT88_KAN310-4_2.tif:0011-0566	1.593	252.197	0	2126	95.589	57.998	0.796	401.812	38334	1.596	0.626	0.899	1.3663
164	IFT88_KAN310-4_2.tif:0012-0622	1.226	52.65	0	257	37.005	63.678	0.763	64.568	6160	1.858	0.538	0.932	0.219554
165	IFT88_KAN310-4_2.tif:0013-0693	1.96	326.701	0	2879	31.41	70.894	0.896	640.368	61093	1.29	0.775	0.944	2.17747
166	IFT88_KAN310-4_2.tif:0014-0797	1.132	141.861	0	731	123.006	81.65	0.809	160.593	15321	1.718	0.582	0.893	0.54607
167	IFT88_KAN310-4_2.tif:0015-0824	1.331	249.331	0	1337	82.956	84.352	0.924	331.908	31665	1.128	0.887	0.951	1.1286
168	IFT88_KAN310-4_2.tif:0016-0861	1.017	44.124	0	218	63.942	88.141	0.933	44.862	4280	1.144	0.874	0.946	0.152547
169	IFT88_KAN310-4_2.tif:0017-0920	1.792	237.602	0	1796	27.168	94.221	0.909	425.878	40630	1.328	0.753	0.94	1.44813
170	IFT88_KAN310-4_3.tif:0001-0177	1.583	220.477	0	1711	27.976	18.097	0.819	348.962	33292	1.573	0.636	0.932	1.18659
171	IFT88_KAN310-4_3.tif:0002-0211	0.88	370.286	0	1396	39.007	21.654	0.951	326.028	31104	1.207	0.828	0.977	1.10861
172	IFT88_KAN310-4_3.tif:0003-0257	2.086	214.935	0	2068	66.216	26.293	0.831	448.33	42772	1.605	0.623	0.896	1.52448
173	IFT88_KAN310-4_3.tif:0004-0402	1.184	33.496	0	207	39.598	41.127	0.721	39.674	3785	2.232	0.448	0.893	0.134905
174	IFT88_KAN310-4_3.tif:0005-0426	0.839	29.575	0	115	42.437	43.614	0.973	24.8	2366	1.211	0.826	0.952	0.0843288
175	IFT88_KAN310-4_3.tif:0006-0430	1.509	149.611	0	912	23.047	44.089	0.885	225.821	21544	1.134	0.882	0.923	0.767869
176	IFT88_KAN310-4_3.tif:0007-0450	1.635	319.538	0	2156	59.514	46.113	0.898	522.5	49848	1.358	0.736	0.978	1.77668
177	IFT88_KAN310-4_3.tif:0008-0495	1.216	365.147	0	1794	92.302	50.677	0.879	443.98	42357	1.415	0.707	0.947	1.50968
178	IFT88_KAN310-4_3.tif:0009-0507	1.74	246.946	0	1484	123.204	51.899	0.841	429.683	40993	1.553	0.644	0.925	1.46107
179	IFT88_KAN310-4_3.tif:0010-0578	1.929	316.022	0	2569	40.671	59.212	0.902	609.499	58148	1.363	0.734	0.946	2.07251
180	IFT88_KAN310-4_3.tif:0011-0622	1.698	190.432	0	1421	2.796	63.69	0.784	323.365	30850	1.785	0.56	0.918	1.09955
181	IFT88_KAN310-4_3.tif:0012-0794	1.457	373.849	0	2467	29.737	81.351	0.887	544.69	51965	1.515	0.66	0.946	1.85213
182	IFT88_KAN310-4_3.tif:0013-0800	1.467	260.179	0	1941	74.825	81.979	0.87	381.802	36425	1.31	0.763	0.94	1.29826
183	IFT88_KAN310-4_3.tif:0014-0836	1.467	197.893	0	1484	112.713	85.576	0.87	290.4	27705	1.342	0.745	0.927	0.987459
184	IFT88_KAN310-4_3.tif:0015-0911	1.845	194.648	0	1563	41.522	93.264	0.871	359.088	34258	1.614	0.62	0.946	1.22102
										28056.9				1
		RPE-BFP-Cas9 sgIFT52
185	IFT88_KAN310-5_1.tif:0001-0075	1.53	20.11	0	113	38.678	7.707	0.931	30.775	2936	1.051	0.951	0.945	0.104645
186	IFT88_KAN310-5_1.tif:0002-0197	1.394	24.842	0	124	62.052	20.218	1	34.632	3304	1.074	0.931	0.953	0.117761
187	IFT88_KAN310-5_1.tif:0003-0219	1.509	31.854	0	202	74.292	22.437	0.958	48.08	4587	1.148	0.871	0.938	0.163489
188	IFT88_KAN310-5_1.tif:0004-0236	1.017	25.732	0	133	97.293	24.155	0.904	26.163	2496	1.383	0.723	0.951	0.0889622
189	IFT88_KAN310-5_1.tif:0005-0297	1.122	23.785	0	141	36.782	30.442	0.953	26.676	2545	1.086	0.921	0.951	0.0907087
190	IFT88_KAN310-5_1.tif:0006-0389	1.352	71.884	0	331	66.03	39.851	0.939	97.198	9273	1.12	0.893	0.963	0.330507
191	IFT88_KAN310-5_1.tif:0007-0461	1.478	39.546	0	308	117.968	47.275	0.876	58.447	5576	1.188	0.842	0.934	0.198739
192	IFT88_KAN310-5_1.tif:0008-0584	2.212	287.758	0	2884	86.842	59.775	0.8	636.427	60717	1.783	0.561	0.955	2.16407
193	IFT88_KAN310-5_1.tif:0009-0614	1.52	37.697	0	240	31.601	62.864	0.869	57.294	5466	1.528	0.654	0.932	0.194819
194	IFT88_KAN310-5_1.tif:0010-0782	2.379	39.656	0	473	51.456	79.989	0.678	94.358	9002	1.409	0.71	0.86	0.320849
195	IFT88_KAN310-5_1.tif:0011-0887	1.583	28.828	0	139	88.062	90.833	0.905	45.628	4353	1.266	0.79	0.938	0.155149
196	IFT88_KAN310-5_2.tif:0001-0019	1.059	83.119	0	541	87.36	2.036	0.9	87.995	8395	1.174	0.852	0.927	0.299214
197	IFT88_KAN310-5_2.tif:0002-0023	1.373	22.58	0	144	31.853	2.334	0.927	31.005	2958	1.016	0.985	0.96	0.105429
198	IFT88_KAN310-5_2.tif:0003-0113	1.153	76.245	0	244	65.737	11.608	0.938	87.911	8387	1.239	0.807	0.936	0.298929
199	IFT88_KAN310-5_2.tif:0004-0121	0.901	9.267	0	60	119.085	12.398	0.994	8.354	797	1.089	0.918	0.935	0.0284066
200	IFT88_KAN310-5_2.tif:0005-0206	1.038	73	0	221	23.037	21.149	0.729	75.752	7227	2.255	0.443	0.912	0.257584
201	IFT88_KAN310-5_2.tif:0006-0234	1.635	54.128	0	225	64.003	24.022	0.959	88.509	8444	1.205	0.83	0.96	0.30096
202	IFT88_KAN310-5_2.tif:0007-0271	1.488	345.507	0	1498	61.65	27.648	0.789	514.261	49062	1.574	0.636	0.907	1.74866
203	IFT88_KAN310-5_2.tif:0008-0422	1.667	324.629	0	2209	61.828	43.251	0.929	541.032	51616	1.324	0.755	0.952	1.83969
204	IFT88_KAN310-5_2.tif:0009-0423	1.446	15.007	0	177	87.983	43.326	0.993	21.708	2071	1.091	0.917	0.958	0.0738144
205	IFT88_KAN310-5_2.tif:0010-0438	1.258	34.725	0	142	10.694	44.835	0.936	43.678	4167	1.158	0.864	0.96	0.14852
206	IFT88_KAN310-5_2.tif:0011-0497	1.279	16.221	0	101	123.332	50.908	0.98	20.744	1979	1.107	0.903	0.972	0.0705353
207	IFT88_KAN310-5_2.tif:0012-0693	1.646	23.51	0	148	82.32	71.014	0.894	38.689	3691	1.249	0.8	0.954	0.131554
208	IFT88_KAN310-5_2.tif:0013-0716	2.013	35.568	0	413	31.725	73.333	0.932	71.581	6829	1.217	0.822	0.939	0.243399
209	IFT88_KAN310-5_2.tif:0014-0753	0.901	26.314	0	149	38.956	77.13	0.927	23.72	2263	1.268	0.789	0.945	0.0806577
210	IFT88_KAN310-5_2.tif:0015-0810	1.101	32.657	0	484	72.33	82.936	0.695	35.942	3429	2.411	0.415	0.85	0.122216
211	IFT88_KAN310-5_2.tif:0016-0844	1.572	29.627	0	276	85.139	86.397	0.946	46.581	4444	1.228	0.815	0.935	0.158393
212	IFT88_KAN310-5_2.tif:0017-0947	1.384	31.742	0	135	49.961	96.924	0.874	43.919	4190	1.436	0.696	0.953	0.14934
213	IFT88_KAN310-5_2.tif:0018-0953	1.258	35.925	0	170	20.23	97.544	0.936	45.187	4311	1.116	0.896	0.964	0.153652
214	IFT88_KAN310-5_2.tif:0019-0960	0.933	18.978	0	123	93.979	98.287	0.959	17.704	1689	1.164	0.859	0.952	0.0601992
215	IFT88_KAN310-5_2.tif:0020-0968	1.122	11.458	0	56	112.078	99.142	0.941	12.851	1226	1.139	0.878	0.939	0.043697
216	IFT88_KAN310-5_2.tif:0021-0978	1.174	7.17	0	48	71.141	100.146	0.651	8.417	803	2.829	0.353	0.941	0.0286205
217	IFT88_KAN310-5_3.tif:0001-0015	1.08	22.214	0	144	69.668	1.541	0.901	23.982	2288	1.327	0.753	0.976	0.0815487
218	IFT88_KAN310-5_3.tif:0002-0103	0.954	21.462	0	85	77.639	10.619	0.848	20.471	1953	1.273	0.785	0.91	0.0696087
219	IFT88_KAN310-5_3.tif:0003-0136	1.279	23.246	0	156	43.811	13.899	0.94	29.727	2836	1.392	0.718	0.957	0.10108
220	IFT88_KAN310-5_3.tif:0004-0202	1.331	65.252	0	436	31.751	20.692	0.979	86.863	8287	1.015	0.985	0.951	0.295365
221	IFT88_KAN310-5_3.tif:0005-0370	1.426	40.206	0	184	11.72	37.889	0.978	57.315	5468	1.089	0.918	0.951	0.19489
222	IFT88_KAN310-5_3.tif:0006-0387	1.426	33.713	0	195	63.594	39.615	0.941	48.059	4585	1.412	0.708	0.944	0.163418
223	IFT88_KAN310-5_3.tif:0007-0386	0.88	328.631	1	1079	25.288	39.57	0.951	289.352	27605	1.207	0.828	0.977	0.983895
224	IFT88_KAN310-5_3.tif:0008-0598	1.342	30.156	0	203	71.3	61.225	0.916	40.46	3860	1.102	0.907	0.985	0.137578
225	IFT88_KAN310-5_3.tif:0009-0651	1.457	28.662	0	155	37.657	66.672	0.877	41.76	3984	1.318	0.759	0.908	0.141997
226	IFT88_KAN310-5_3.tif:0010-0709	1.069	35.029	0	133	90.2	72.65	0.95	37.452	3573	1.09	0.918	0.962	0.127349
227	IFT88_KAN310-5_3.tif:0011-0881	1.52	26.566	0	185	11.311	90.186	0.925	40.376	3852	1.166	0.857	0.954	0.137293
228	IFT88_KAN310-5_3.tif:0012-0906	1.059	18.406	0	98	60.877	92.83	0.9	19.486	1859	1.142	0.876	0.918	0.0662583
229	IFT88_KAN310-5_3.tif:0013-1024	1.415	26.956	0	187	5.604	104.845	0.919	38.143	3639	1.311	0.763	0.954	0.129701
										8044.93				0.286737

## Sheet: IF condition
Exp. number	Cell line	Culture condition	Fixation condition	rabbit-Alexa488	mouse IgG1-Alexa568	mouse IgG2b-Alexa647	Nuclear stain	Date	Replicate
KAN310-4	RPE-BFP-Cas9	serum starvation for 24 hours	Fixed with 4% PFA at RT for 15 minutes	IFT88, Proteintech, 1:500	CEP170, Invitrogen, 41-3200, 1:1000	Ac-Tub, 6B-11, SIGMA, 1:2000	DAPI
KAN310-5	RPE-BFP-Cas9 sgIFT52#1 (post-Cre)	serum starvation for 24 hours	Fixed with 4% PFA at RT for 15 minutes	IFT88, Proteintech, 1:500	CEP170, Invitrogen, 41-3200, 1:1000	Ac-Tub, 6B-11, SIGMA, 1:2000	DAPI
