# Supplementary material for: A hierarchical pathway for assembly of the distal appendages that organize primary cilia
Source: eLife. 2025 Jan 30;14:e85999. doi: 10.7554/eLife.85999 (PMC11984956; doi:10.7554/eLife.85999)
Supplement: Figure 4—source data 7. [file elife-85999-fig4-data7.xlsx]

## Sheet: Raw data
	Label	Area	Mean	Min	Max	X	Y	Circ	IntDen	RawIntDen	AR	Round	Solidity
		RPE-BFP-Cas9 none
117	IFT57_KAN310-29_1.tif:0001-0077	1.719	131.457	0	735	69.363	7.896	0.831	225.978	21559	1.57	0.637	0.921	1.11407
118	IFT57_KAN310-29_1.tif:0002-0127	0.912	132.138	0	541	123.121	13.038	0.938	120.499	11496	1.29	0.775	0.951	0.594059
119	IFT57_KAN310-29_1.tif:0003-0140	0.943	174.756	0	495	18.82	14.325	0.938	164.859	15728	1.093	0.915	0.952	0.812749
120	IFT57_KAN310-29_1.tif:0004-0237	1.384	103.955	0	700	130.008	24.253	0.865	143.832	13722	1.601	0.625	0.93	0.709088
121	IFT57_KAN310-29_1.tif:0005-0242	1.405	118.06	0	679	4.403	24.827	0.888	165.823	15820	1.292	0.774	0.95	0.817503
122	IFT57_KAN310-29_1.tif:0006-0280	1.698	128.302	0	984	81.315	28.629	0.878	217.865	20785	1.221	0.819	0.959	1.07407
123	IFT57_KAN310-29_1.tif:0007-0383	1.74	185.349	0	908	53.667	39.223	0.882	322.506	30768	1.364	0.733	0.93	1.58995
124	IFT57_KAN310-29_1.tif:0008-0507	1.247	98.294	0	601	1.287	51.964	0.944	122.606	11697	1.289	0.776	0.933	0.604446
125	IFT57_KAN310-29_1.tif:0009-0527	1.75	60.15	0	308	28.308	53.95	0.816	105.29	10045	1.586	0.631	0.952	0.519078
126	IFT57_KAN310-29_1.tif:0010-0649	1.509	92.035	0	845	94.799	66.51	0.933	138.916	13253	1.216	0.822	0.92	0.684853
127	IFT57_KAN310-29_1.tif:0011-0739	1.625	156.652	0	836	25.541	75.677	0.883	254.51	24281	1.319	0.758	0.942	1.25473
128	IFT57_KAN310-29_1.tif:0012-0744	1.656	150.146	0	1040	70.703	76.136	0.923	248.661	23723	1.205	0.83	0.949	1.22589
129	IFT57_KAN310-29_1.tif:0013-0829	1.027	86.49	0	485	124.188	84.874	0.925	88.844	8476	1.052	0.95	0.99	0.438
130	IFT57_KAN310-29_1.tif:0014-0895	1.342	98.648	0	341	60.606	91.69	0.947	132.354	12627	1.302	0.768	0.934	0.652504
131	IFT57_KAN310-29_1.tif:0015-0945	1.017	95.959	0	460	138.107	96.828	0.933	97.565	9308	1.133	0.883	0.951	0.480994
132	IFT57_KAN310-29_1.tif:0016-0994	1.509	139.958	0	627	93.575	101.769	0.943	211.251	20154	1.221	0.819	0.947	1.04146
133	IFT57_KAN310-29_1.tif:0017-1008	1.426	175.331	0	914	35.057	103.227	0.978	249.94	23845	1.095	0.913	0.951	1.2322
134	IFT57_KAN310-29_2.tif:0001-0035	1.059	87.871	0	492	125.861	3.596	0.821	93.026	8875	1.789	0.559	0.962	0.458618
135	IFT57_KAN310-29_2.tif:0002-0091	1.688	148.54	0	979	78.588	9.325	0.931	250.674	23915	1.222	0.818	0.942	1.23581
136	IFT57_KAN310-29_2.tif:0003-0113	1.363	201.492	0	1155	36.189	11.623	0.946	274.562	26194	1.251	0.799	0.959	1.35358
137	IFT57_KAN310-29_2.tif:0004-0180	1.604	184.575	0	1142	71.413	18.434	0.926	296.008	28240	1.026	0.975	0.968	1.45931
138	IFT57_KAN310-29_2.tif:0005-0337	1.111	111.981	0	488	117.745	34.527	0.975	124.42	11870	1.234	0.81	0.959	0.613386
139	IFT57_KAN310-29_2.tif:0006-0429	0.985	84.191	0	510	33.692	43.93	0.979	82.953	7914	1.046	0.956	0.974	0.408958
140	IFT57_KAN310-29_2.tif:0007-0551	1.709	222.442	0	1419	47.289	56.439	0.906	380.051	36258	1.113	0.898	0.956	1.87364
141	IFT57_KAN310-29_2.tif:0008-0617	1.006	103.01	0	339	13.242	63.153	0.954	103.655	9889	1.118	0.895	0.946	0.511017
142	IFT57_KAN310-29_2.tif:0009-0627	1.824	204.184	0	1509	70.926	64.164	0.861	372.399	35528	1.485	0.673	0.946	1.83592
143	IFT57_KAN310-29_2.tif:0010-0683	1.08	134.748	0	607	100.703	69.968	0.837	145.478	13879	1.62	0.617	0.941	0.717202
144	IFT57_KAN310-29_2.tif:0011-0736	1.73	243.206	0	1853	31.444	75.424	0.908	420.627	40129	1.185	0.844	0.94	2.07368
145	IFT57_KAN310-29_2.tif:0012-0867	1.572	215.367	0	1543	10.942	88.755	0.957	338.616	32305	1.18	0.848	0.962	1.66937
146	IFT57_KAN310-29_2.tif:0013-0965	1.09	134.269	0	679	126.069	98.852	0.871	146.369	13964	1.597	0.626	0.945	0.721594
147	IFT57_KAN310-29_2.tif:0014-1019	1.247	229.462	0	821	73.907	104.36	0.917	286.218	27306	1.06	0.943	0.933	1.41105
148	IFT57_KAN310-29_3.tif:0001-0139	1.52	88.2	0	604	94.897	14.276	0.925	134.052	12789	1.155	0.866	0.954	0.660875
149	IFT57_KAN310-29_3.tif:0002-0175	1.625	158.832	0	868	37.731	17.903	0.874	258.053	24619	1.254	0.797	0.923	1.27219
150	IFT57_KAN310-29_3.tif:0003-0274	1.782	114.835	0	865	83.576	28.069	0.778	204.627	19522	1.621	0.617	0.899	1.00881
151	IFT57_KAN310-29_3.tif:0004-0418	1.3	139.96	0	616	117.354	42.788	0.955	181.913	17355	1.147	0.872	0.943	0.896825
152	IFT57_KAN310-29_3.tif:0005-0491	1.52	119.869	0	769	122.927	50.288	0.869	182.185	17381	1.504	0.665	0.924	0.898168
153	IFT57_KAN310-29_3.tif:0006-0499	1.761	149.958	0	779	71.291	51.133	0.824	264.069	25193	1.344	0.744	0.884	1.30186
154	IFT57_KAN310-29_3.tif:0007-0575	1.866	162.287	0	1230	32.854	58.943	0.902	302.789	28887	1.432	0.698	0.957	1.49274
155	IFT57_KAN310-29_3.tif:0008-0644	1.677	198.794	0	1277	58.109	65.924	0.934	333.396	31807	1.203	0.832	0.955	1.64364
156	IFT57_KAN310-29_3.tif:0009-0716	1.289	123.854	0	676	14.576	73.362	0.948	159.681	15234	1.192	0.839	0.943	0.787222
157	IFT57_KAN310-29_3.tif:0010-0896	1.415	134.23	0	465	42.422	91.71	0.944	189.942	18121	1.14	0.877	0.951	0.936408
158	IFT57_KAN310-29_3.tif:0011-0915	0.849	33.568	0	167	72.448	93.727	0.873	28.5	2719	1.475	0.678	0.926	0.140505
159	IFT57_KAN310-29_3.tif:0012-0992	1.394	112.323	0	737	118.905	101.533	0.858	156.588	14939	1.373	0.728	0.933	0.771977
										19351.6				1
		RPE-BFP-Cas9 sgIFT52
160	IFT57_KAN310-30_1.tif:0001-0176	1.268	74.851	0	352	57.381	18.006	0.944	94.934	9057	1.08	0.926	0.964	0.468023
161	IFT57_KAN310-30_1.tif:0002-0230	1.08	43.233	0	204	115.224	23.589	0.863	46.676	4453	1.425	0.702	0.945	0.23011
162	IFT57_KAN310-30_1.tif:0003-0330	0.975	41.333	0	171	84.518	33.76	0.956	40.292	3844	1.149	0.87	0.939	0.19864
163	IFT57_KAN310-30_1.tif:0004-0487	0.86	63.476	0	224	103.711	49.908	0.962	54.558	5205	1.131	0.884	0.959	0.26897
164	IFT57_KAN310-30_1.tif:0005-0637	1.101	47.667	0	190	113.676	65.247	0.809	52.462	5005	1.362	0.734	0.879	0.258635
165	IFT57_KAN310-30_1.tif:0006-0689	1.3	52.718	0	298	46.068	70.607	0.844	68.52	6537	1.738	0.575	0.922	0.337801
166	IFT57_KAN310-30_1.tif:0007-0705	0.933	46.921	0	131	123.593	72.183	0.959	43.772	4176	1.116	0.896	0.957	0.215796
167	IFT57_KAN310-30_1.tif:0008-0735	1.562	209.966	0	1223	73.036	75.285	0.87	327.925	31285	1.157	0.864	0.925	1.61666
168	IFT57_KAN310-30_1.tif:0009-0971	1.3	88.677	0	319	72.679	99.414	0.902	115.259	10996	1.088	0.919	0.936	0.568222
169	IFT57_KAN310-30_2.tif:0001-0065	1.153	47.818	0	339	54.459	6.655	0.98	55.135	5260	1.225	0.816	0.965	0.271812
170	IFT57_KAN310-30_2.tif:0002-0125	1.331	59.299	0	274	100.807	12.826	0.864	78.939	7531	1.415	0.706	0.934	0.389167
171	IFT57_KAN310-30_2.tif:0003-0176	0.996	42.8	0	158	66.459	18.023	0.957	42.619	4066	1.073	0.932	0.979	0.210112
172	IFT57_KAN310-30_2.tif:0004-0191	1.363	34.731	0	169	30.743	19.591	0.935	47.326	4515	1.243	0.804	0.942	0.233314
173	IFT57_KAN310-30_2.tif:0005-0361	1.342	71.07	0	299	64.767	37.022	0.958	95.353	9097	1.193	0.838	0.955	0.47009
174	IFT57_KAN310-30_2.tif:0006-0399	1.226	32.282	0	160	99.065	40.858	0.886	39.59	3777	1.215	0.823	0.947	0.195178
175	IFT57_KAN310-30_2.tif:0007-0453	1.132	22.009	0	134	122.066	46.428	0.867	24.915	2377	1.229	0.814	0.919	0.122832
176	IFT57_KAN310-30_2.tif:0008-0572	1.331	48.047	0	239	77.953	58.55	0.913	63.96	6102	1.199	0.834	0.914	0.315323
177	IFT57_KAN310-30_2.tif:0009-0605	1.352	44.729	0	318	40.69	61.953	0.939	60.48	5770	1.186	0.843	0.963	0.298166
178	IFT57_KAN310-30_2.tif:0010-0636	1.488	146.218	0	848	46.991	65.165	0.882	217.635	20763	1.093	0.915	0.922	1.07293
179	IFT57_KAN310-30_2.tif:0011-0638	1.216	73.845	0	198	25.097	65.371	0.96	89.788	8566	1.107	0.903	0.955	0.442651
180	IFT57_KAN310-30_2.tif:0012-0645	1.446	82.717	0	337	5.001	66.051	0.929	119.65	11415	1.192	0.839	0.929	0.589874
181	IFT57_KAN310-30_2.tif:0013-0646	1.226	66.162	0	279	92.919	66.173	0.924	81.14	7741	1.038	0.964	0.987	0.400019
182	IFT57_KAN310-30_2.tif:0014-0683	1.258	22.858	0	109	20.695	69.949	0.909	28.752	2743	1.292	0.774	0.968	0.141745
183	IFT57_KAN310-30_2.tif:0015-0808	0.839	51.987	0	158	87.218	82.808	0.806	43.594	4159	1.549	0.646	0.899	0.214918
184	IFT57_KAN310-30_2.tif:0016-0873	1.111	93.283	0	329	25.52	89.422	0.888	103.645	9888	1.242	0.805	0.951	0.510965
185	IFT57_KAN310-30_2.tif:0017-0887	1.059	36.604	0	148	103.918	90.853	0.959	38.751	3697	1.243	0.805	0.94	0.191044
186	IFT57_KAN310-30_2.tif:0018-1026	1.237	101.661	0	400	57.91	105.026	0.948	125.74	11996	1.072	0.933	0.955	0.619897
187	IFT57_KAN310-30_3.tif:0001-0110	1.363	152.154	0	990	45.442	11.305	0.895	207.331	19780	1.184	0.844	0.959	1.02214
188	IFT57_KAN310-30_3.tif:0002-0315	1.415	65.474	0	331	68.893	32.3	0.894	92.649	8839	1.271	0.787	0.957	0.456758
189	IFT57_KAN310-30_3.tif:0003-0373	1.163	32.432	0	148	94.605	38.2	0.902	37.735	3600	1.239	0.807	0.965	0.186031
190	IFT57_KAN310-30_3.tif:0004-0403	1.436	121.672	0	551	39.777	41.252	0.958	174.722	16669	1.186	0.843	0.958	0.861376
191	IFT57_KAN310-30_3.tif:0005-0488	0.88	10.869	0	40	89.715	49.994	0.655	9.57	913	2.46	0.407	0.812	0.0471796
192	IFT57_KAN310-30_3.tif:0006-0615	1.08	57.019	0	157	93.618	62.935	0.901	61.56	5873	1.131	0.885	0.972	0.303489
193	IFT57_KAN310-30_3.tif:0007-0668	1.415	48.244	0	198	14.928	68.386	0.934	68.268	6513	1.179	0.848	0.922	0.336561
194	IFT57_KAN310-30_3.tif:0008-0693	1.541	73.204	0	270	57.086	71.022	0.963	112.795	10761	1.137	0.88	0.951	0.556078
195	IFT57_KAN310-30_3.tif:0009-0777	1.258	14.708	0	67	87.137	79.643	0.883	18.5	1765	1.112	0.899	0.964	0.0912069
196	IFT57_KAN310-30_3.tif:0010-0841	0.985	43.745	0	207	22.341	86.194	0.837	43.101	4112	1.578	0.634	0.913	0.212489
197	IFT57_KAN310-30_3.tif:0011-0888	1.405	54.015	0	196	32.401	90.949	0.937	75.868	7238	1.183	0.845	0.95	0.374026
										7791.68				0.402638

## Sheet: IF condition
Exp. number	Cell line	Culture condition	Fixation condition	rabbit-Alexa488	mouse IgG1-Alexa568	mouse IgG2b-Alexa647	Nuclear stain	Date	Replicate
KAN310-29	RPE-BFP-Cas9	serum starvation for 24 hours	Fixed with 4% PFA at RT for 15 minutes	IFT57 Antibody, 11083-1-AP, Proteintech, 1:500	CEP170, Invitrogen, 41-3200, 1:1000	Ac-Tub, 6B-11, SIGMA, 1:2000	DAPI
KAN310-30	RPE-BFP-Cas9 sgIFT52#1 (post-Cre)	serum starvation for 24 hours	Fixed with 4% PFA at RT for 15 minutes	IFT57 Antibody, 11083-1-AP, Proteintech, 1:500	CEP170, Invitrogen, 41-3200, 1:1000	Ac-Tub, 6B-11, SIGMA, 1:2000	DAPI
