# Supplementary material for: A hierarchical pathway for assembly of the distal appendages that organize primary cilia
Source: eLife. 2025 Jan 30;14:e85999. doi: 10.7554/eLife.85999 (PMC11984956; doi:10.7554/eLife.85999)
Supplement: Figure 4—source data 8. [file elife-85999-fig4-data8.xlsx]

## Sheet: Raw data
sgGFP (pMCB306)	Label	Area	Mean	Min	Max	X	Y	Circ	IntDen	RawIntDen	AR	Round	Solidity
616	CEP19_KAN631-1_1.tif:0001-0015	1.121	243.023	0	1171	77.469	1.686	0.919	272.369	21143	1.118	0.895	0.983	#REF!
617	CEP19_KAN631-1_1.tif:0002-0193	1.404	169.725	0	1025	84.289	21.947	0.886	238.322	18500	1.522	0.657	0.969	#REF!
618	CEP19_KAN631-1_1.tif:0003-0272	1.121	196.862	0	848	16.292	30.878	0.951	220.634	17127	1.114	0.897	0.983	#REF!
619	CEP19_KAN631-1_1.tif:0004-0369	0.889	159.348	6	551	35.747	41.933	0.933	141.64	10995	1.172	0.853	0.979	#REF!
620	CEP19_KAN631-1_1.tif:0005-0438	1.005	204.423	0	774	55.161	49.713	0.929	205.408	15945	1.259	0.794	0.987	#REF!
621	CEP19_KAN631-1_1.tif:0006-0504	1.507	120.496	0	662	119.622	57.212	0.666	181.614	14098	1.998	0.501	0.812	#REF!
622	CEP19_KAN631-1_1.tif:0007-0505	1.108	242.314	0	1044	85.068	57.307	0.94	268.453	20839	1.129	0.886	0.977	#REF!
623	CEP19_KAN631-1_1.tif:0008-0543	1.378	176.935	0	1023	107.152	61.628	0.766	243.887	18932	1.972	0.507	0.947	#REF!
624	CEP19_KAN631-1_1.tif:0009-0624	0.915	219.986	0	844	128.715	70.887	0.924	201.208	15619	1.13	0.885	0.993	#REF!
625	CEP19_KAN631-1_1.tif:0010-0774	0.721	169.875	10	504	60.439	87.849	0.92	122.549	9513	1.143	0.875	1	#REF!
626	CEP19_KAN631-1_1.tif:0011-0777	0.902	220.171	0	910	6.98	88.19	0.947	198.541	15412	1.146	0.873	0.986	#REF!
627	CEP19_KAN631-1_1.tif:0012-0801	0.799	174.774	0	707	42.563	90.914	0.96	139.592	10836	1.081	0.925	0.984	#REF!
628	CEP19_KAN631-1_1.tif:0013-0894	0.915	247.479	0	1293	17.36	101.532	0.924	226.354	17571	1.13	0.885	0.993	#REF!
629	CEP19_KAN631-1_1.tif:0014-0917	0.94	160.575	0	583	100.59	104.093	0.936	151.006	11722	1.299	0.77	0.961	#REF!
630	CEP19_KAN631-1_1.tif:0015-1025	0.799	165.839	0	549	110.89	116.338	0.96	132.455	10282	1.081	0.925	0.984	#REF!
631	CEP19_KAN631-1_2.tif:0001-0051	1.417	173.555	0	877	33.566	5.834	0.757	245.935	19091	1.575	0.635	0.87	#REF!
632	CEP19_KAN631-1_2.tif:0002-0073	1.005	280.192	0	1207	122.807	8.286	0.929	281.542	21855	1.259	0.794	0.987	#REF!
633	CEP19_KAN631-1_2.tif:0003-0181	1.095	178.282	0	811	82.235	20.548	0.929	195.218	15154	1.137	0.879	0.971	#REF!
634	CEP19_KAN631-1_2.tif:0004-0196	1.546	142.642	0	757	21.112	22.344	0.826	220.506	17117	1.746	0.573	0.949	#REF!
635	CEP19_KAN631-1_2.tif:0005-0251	1.533	129.664	0	911	132.828	28.518	0.819	198.773	15430	1.514	0.661	0.915	#REF!
636	CEP19_KAN631-1_2.tif:0006-0253	0.812	183.222	0	509	107.024	28.722	0.937	148.7	11543	1.039	0.963	0.992	#REF!
637	CEP19_KAN631-1_2.tif:0007-0343	1.043	161.654	0	649	90.347	38.996	0.95	168.68	13094	1.277	0.783	0.959	#REF!
638	CEP19_KAN631-1_2.tif:0008-0357	1.262	175.163	0	918	49.495	40.565	0.885	221.137	17166	1.418	0.705	0.951	#REF!
639	CEP19_KAN631-1_2.tif:0009-0472	1.507	187.222	0	1211	71.054	53.559	0.735	282.186	21905	1.51	0.662	0.857	#REF!
640	CEP19_KAN631-1_3.tif:0001-0095	1.52	138.008	0	973	8.057	10.859	0.696	209.787	16285	1.905	0.525	0.837	#REF!
641	CEP19_KAN631-1_3.tif:0002-0225	1.314	192.725	0	1075	14.699	25.568	0.892	253.239	19658	1.066	0.938	0.967	#REF!
642	CEP19_KAN631-1_3.tif:0003-0289	1.726	148.433	0	1030	105.254	32.885	0.833	256.228	19890	1.666	0.6	0.915	#REF!
643	CEP19_KAN631-1_3.tif:0004-0339	1.095	256.729	0	1126	84.609	38.483	0.929	281.117	21822	1.15	0.87	0.971	#REF!
644	CEP19_KAN631-1_3.tif:0005-0535	1.069	148.313	0	678	55.836	60.76	0.908	158.581	12310	1.365	0.733	0.971	#REF!
645	CEP19_KAN631-1_3.tif:0006-0626	0.966	238.453	0	1075	130.203	71.055	0.926	230.386	17884	1.244	0.804	0.968	#REF!
646	CEP19_KAN631-1_3.tif:0007-0636	1.559	137.471	0	710	105.222	72.171	0.88	214.283	16634	1.333	0.75	0.931	#REF!
647	CEP19_KAN631-1_3.tif:0008-0906	1.868	114.076	0	1107	89.558	102.844	0.834	213.085	16541	1.658	0.603	0.96	#REF!
648	CEP19_KAN631-1_3.tif:0009-1064	0.889	202.043	0	748	37.79	120.826	0.933	179.591	13941	1.172	0.853	0.979	#REF!
649	CEP19_KAN631-1_3.tif:0010-1076	0.799	62.452	0	381	81.755	122.135	0.984	49.88	3872	1.202	0.832	0.932	#REF!
650	CEP19_KAN631-1_4.tif:0001-0042	1.597	222.065	0	1320	104.102	4.734	0.955	354.726	27536	1.192	0.839	0.95	#REF!
651	CEP19_KAN631-1_4.tif:0002-0068	1.868	170.69	0	1231	74.925	7.784	0.826	318.836	24750	1.317	0.759	0.918	#REF!
652	CEP19_KAN631-1_4.tif:0003-0261	1.469	204.64	0	1247	47.361	29.769	0.83	300.53	23329	1.265	0.791	0.905	#REF!
653	CEP19_KAN631-1_4.tif:0004-0358	1.765	161.657	0	1236	118.722	40.686	0.884	285.303	22147	1.358	0.736	0.945	#REF!
654	CEP19_KAN631-1_4.tif:0005-0396	1.816	303.27	0	2286	86.548	45.006	0.899	550.858	42761	1.223	0.818	0.937	#REF!
655	CEP19_KAN631-1_4.tif:0006-0413	0.979	167.868	0	600	5.57	46.85	0.939	164.352	12758	1.249	0.801	0.981	#REF!
656	CEP19_KAN631-1_4.tif:0007-0444	1.507	124.496	0	750	20.839	50.411	0.886	187.643	14566	1.276	0.784	0.947	#REF!
657	CEP19_KAN631-1_4.tif:0008-0578	1.597	128.161	0	745	49.08	65.69	0.779	204.725	15892	1.896	0.527	0.925	#REF!
658	CEP19_KAN631-1_4.tif:0009-0707	0.799	121.048	4	333	1.703	80.245	0.96	96.681	7505	1.081	0.925	0.984	#REF!
659	CEP19_KAN631-1_4.tif:0010-0738	1.456	178.956	0	924	89.596	83.8	0.964	260.505	20222	1.11	0.901	0.95	#REF!
660	CEP19_KAN631-1_4.tif:0011-0758	1.572	204.689	0	837	126.597	86.089	0.863	321.696	24972	1.448	0.691	0.935	#REF!
661	CEP19_KAN631-1_4.tif:0012-0809	1.301	219.99	0	1348	99.742	91.85	0.884	286.231	22219	1.361	0.735	0.967	#REF!
662	CEP19_KAN631-1_4.tif:0013-0868	1.726	134.604	0	873	111.516	98.57	0.898	232.357	18037	1.245	0.803	0.975	#REF!
663	CEP19_KAN631-1_4.tif:0014-0929	1.185	212.272	0	1177	73.422	105.449	0.897	251.577	19529	1.509	0.663	0.984	#REF!
664	CEP19_KAN631-1_4.tif:0015-1163	1.056	184.293	0	932	70.54	132.001	0.928	194.677	15112	1.268	0.789	0.965	#REF!
										17368.6				#REF!
														#REF!
										#REF!				#REF!
														#REF!
														#REF!
FOP KO														#REF!
444	CEP19_KAN631-15_1.tif:0001-0066	1.919	23.785	0	92	15.135	7.533	0.811	45.655	3544	1.746	0.573	0.911	#REF!
445	CEP19_KAN631-15_1.tif:0002-0071	1.211	37.468	0	174	74.64	8.132	0.947	45.371	3522	1.218	0.821	0.979	#REF!
446	CEP19_KAN631-15_1.tif:0003-0137	1.172	29.176	0	118	100.794	15.554	0.948	34.202	2655	1.113	0.898	0.958	#REF!
447	CEP19_KAN631-15_1.tif:0004-0256	1.134	35.364	0	163	142.891	29.06	0.917	40.09	3112	1.233	0.811	0.941	#REF!
448	CEP19_KAN631-15_1.tif:0005-0325	1.945	35.887	0	134	65.058	36.865	0.905	69.809	5419	1.469	0.681	0.947	#REF!
449	CEP19_KAN631-15_1.tif:0006-0356	1.43	29.315	0	108	22.032	40.464	0.947	41.919	3254	1.221	0.819	0.941	#REF!
450	CEP19_KAN631-15_1.tif:0007-0471	1.082	16.345	0	73	41.938	53.471	0.985	17.687	1373	1.093	0.915	0.966	#REF!
451	CEP19_KAN631-15_1.tif:0008-0478	1.636	35.126	0	132	85.31	54.332	0.913	57.468	4461	1.289	0.776	0.93	#REF!
452	CEP19_KAN631-15_1.tif:0009-0478	1.095	22.918	0	125	118.718	54.29	0.949	25.095	1948	1.04	0.962	0.934	#REF!
453	CEP19_KAN631-15_1.tif:0010-0745	1.417	9.973	0	59	143.979	84.638	0.883	14.132	1097	1.335	0.749	0.936	#REF!
454	CEP19_KAN631-15_1.tif:0011-0767	1.971	21.235	0	138	104.894	87.115	0.941	41.854	3249	1.148	0.871	0.942	#REF!
455	CEP19_KAN631-15_1.tif:0012-0845	1.456	12.735	0	99	53.087	95.964	0.947	18.538	1439	1.039	0.962	0.974	#REF!
456	CEP19_KAN631-15_1.tif:0013-0851	1.481	33.826	0	114	20.597	96.631	0.924	50.112	3890	1.347	0.742	0.954	#REF!
457	CEP19_KAN631-15_1.tif:0014-0909	1.585	21.61	0	105	122.213	103.161	0.91	34.241	2658	1.561	0.641	0.935	#REF!
458	CEP19_KAN631-15_1.tif:0015-0975	1.507	18.188	0	96	72.471	110.689	0.886	27.413	2128	1.361	0.735	0.955	#REF!
459	CEP19_KAN631-15_1.tif:0016-1178	0.966	17.827	0	92	109.978	133.722	0.961	17.224	1337	1.262	0.793	0.974	#REF!
460	CEP19_KAN631-15_2.tif:0001-0018	1.069	24.036	0	83	59.216	2.059	0.94	25.7	1995	1.132	0.884	0.965	#REF!
461	CEP19_KAN631-15_2.tif:0002-0058	1.43	21.117	0	99	95.52	6.647	0.959	30.196	2344	1.047	0.955	0.965	#REF!
462	CEP19_KAN631-15_2.tif:0003-0173	1.765	23.394	0	136	22.964	19.602	0.958	41.288	3205	1.133	0.882	0.961	#REF!
463	CEP19_KAN631-15_2.tif:0004-0344	1.533	24.655	0	157	106.928	39.065	0.956	37.797	2934	1.156	0.865	0.964	#REF!
464	CEP19_KAN631-15_2.tif:0005-0367	1.237	24.49	0	83	136.347	41.727	0.855	30.286	2351	1.472	0.679	0.919	#REF!
465	CEP19_KAN631-15_2.tif:0006-0548	1.224	17.074	0	80	38.435	62.203	1	20.895	1622	1.178	0.849	0.95	#REF!
466	CEP19_KAN631-15_2.tif:0007-0587	0.837	30.831	0	139	8.8	66.62	0.951	25.816	2004	1.226	0.816	0.956	#REF!
467	CEP19_KAN631-15_2.tif:0008-0633	1.752	41.36	0	188	80.787	71.931	0.951	72.463	5625	1.278	0.782	0.954	#REF!
468	CEP19_KAN631-15_2.tif:0009-0637	1.082	350.798	0	2547	56.447	72.318	0.919	379.601	29467	1.206	0.829	0.971	#REF!
469	CEP19_KAN631-15_2.tif:0010-0742	1.443	50.009	0	146	30.806	84.224	0.985	72.153	5601	1.148	0.871	0.941	#REF!
470	CEP19_KAN631-15_2.tif:0011-0770	1.366	367.198	0	1781	132.463	87.431	0.927	501.416	38923	1.106	0.904	0.986	#REF!
471	CEP19_KAN631-15_2.tif:0012-0874	1.443	25.839	0	101	113.712	99.16	0.927	37.281	2894	1.346	0.743	0.961	#REF!
472	CEP19_KAN631-15_2.tif:0013-0968	1.327	19	0	80	48.872	109.874	0.901	25.211	1957	1.318	0.759	0.976	#REF!
473	CEP19_KAN631-15_2.tif:0014-1009	0.876	20.191	0	60	95.724	114.532	0.956	17.687	1373	1.113	0.899	0.971	#REF!
474	CEP19_KAN631-15_2.tif:0015-1033	0.812	244.635	0	1223	102.27	117.239	0.937	198.541	15412	1.039	0.963	0.992	#REF!
475	CEP19_KAN631-15_2.tif:0016-1087	1.391	14.769	0	54	134.499	123.367	0.933	20.547	1595	1.206	0.829	0.956	#REF!
476	CEP19_KAN631-15_2.tif:0017-1103	1.095	15.588	0	88	20.878	125.195	0.949	17.069	1325	1.11	0.901	0.934	#REF!
477	CEP19_KAN631-15_2.tif:0018-1119	0.824	170.391	0	588	50.281	127.007	0.914	140.481	10905	1	1	1	#REF!
478	CEP19_KAN631-15_2.tif:0019-1198	0.915	16.437	0	59	49.891	136.02	0.982	15.034	1167	1.055	0.948	0.947	#REF!
479	CEP19_KAN631-15_2.tif:0020-1226	0.902	194.071	0	398	93.467	139.151	0.947	175.005	13585	1.146	0.873	0.986	#REF!
480	CEP19_KAN631-15_3.tif:0001-0107	1.34	14.288	0	68	41.482	12.22	0.927	19.143	1486	1.217	0.821	0.95	#REF!
481	CEP19_KAN631-15_3.tif:0002-0181	1.791	42.547	0	233	109.169	20.537	0.887	76.186	5914	1.649	0.607	0.949	#REF!
482	CEP19_KAN631-15_3.tif:0003-0256	1.636	41.024	0	189	14.869	29.102	0.913	67.117	5210	1.479	0.676	0.937	#REF!
483	CEP19_KAN631-15_3.tif:0004-0274	1.636	18.898	0	96	86.569	31.162	0.899	30.917	2400	1.222	0.818	0.948	#REF!
484	CEP19_KAN631-15_3.tif:0005-0316	1.288	15.33	0	101	123.053	35.907	0.932	19.748	1533	1.136	0.88	0.957	#REF!
485	CEP19_KAN631-15_3.tif:0006-0396	1.7	20.856	0	111	13.484	44.961	0.949	35.465	2753	1.114	0.898	0.943	#REF!
486	CEP19_KAN631-15_3.tif:0007-0403	0.889	194.333	0	672	92.735	45.792	0.933	172.738	13409	1.172	0.853	0.979	#REF!
487	CEP19_KAN631-15_3.tif:0008-0456	1.829	23.12	0	97	127.582	51.79	0.945	42.292	3283	1.108	0.902	0.922	#REF!
488	CEP19_KAN631-15_3.tif:0009-0576	1.34	14.394	0	63	35.134	65.429	0.987	19.285	1497	1.085	0.922	0.941	#REF!
489	CEP19_KAN631-15_3.tif:0010-0612	0.992	235.169	1	1105	113.959	69.467	0.917	233.272	18108	1.277	0.783	0.981	#REF!
490	CEP19_KAN631-15_3.tif:0011-0683	1.443	33.464	0	88	68.363	77.518	0.873	48.283	3748	1.193	0.838	0.926	#REF!
491	CEP19_KAN631-15_3.tif:0012-0805	1.7	28.985	0	130	127.844	91.428	0.961	49.287	3826	1.193	0.838	0.967	#REF!
492	CEP19_KAN631-15_3.tif:0013-0818	1.404	21	0	66	4.72	92.902	0.971	29.487	2289	1.116	0.896	0.956	#REF!
493	CEP19_KAN631-15_3.tif:0014-0819	1.456	33.097	0	104	134.74	92.977	0.935	48.18	3740	1.246	0.802	0.95	#REF!
494	CEP19_KAN631-15_3.tif:0015-0948	1.404	15.899	0	86	18.276	107.584	0.942	22.325	1733	1.223	0.818	0.96	#REF!
495	CEP19_KAN631-15_3.tif:0016-1073	1.7	23.008	0	131	65.783	121.806	0.923	39.123	3037	1.347	0.742	0.957	#REF!
496	CEP19_KAN631-15_3.tif:0017-1239	1.056	11.427	0	84	8.56	140.604	0.997	12.071	937	1.113	0.898	0.965	#REF!
497	CEP19_KAN631-15_3.tif:0018-1268	1.507	11.829	0	45	90.127	144.014	0.828	17.829	1384	1.335	0.749	0.903	#REF!
498	CEP19_KAN631-15_4.tif:0001-0025	0.721	188.143	7	542	33.029	2.894	0.92	135.727	10536	1.143	0.875	1	#REF!
499	CEP19_KAN631-15_4.tif:0002-0034	1.52	18.983	0	109	31.192	3.854	0.92	28.856	2240	1.311	0.763	0.963	#REF!
500	CEP19_KAN631-15_4.tif:0003-0057	1.481	19.165	0	84	12.032	6.518	0.981	28.392	2204	1.184	0.845	0.95	#REF!
501	CEP19_KAN631-15_4.tif:0004-0410	1.636	24.228	0	110	87.479	46.604	0.951	39.639	3077	1.164	0.859	0.958	#REF!
502	CEP19_KAN631-15_4.tif:0005-0427	1.636	40.764	0	231	61.301	48.452	0.888	66.691	5177	1.113	0.899	0.927	#REF!
503	CEP19_KAN631-15_4.tif:0006-0503	1.623	57.135	0	258	128.713	57.072	0.943	92.739	7199	1.159	0.863	0.955	#REF!
504	CEP19_KAN631-15_4.tif:0007-0610	0.721	156.571	0	557	86.43	69.235	0.92	112.952	8768	1.143	0.875	1	#REF!
505	CEP19_KAN631-15_4.tif:0008-0641	0.812	228.762	0	1010	48.004	72.76	0.937	185.659	14412	1.039	0.963	0.992	#REF!
506	CEP19_KAN631-15_4.tif:0009-0708	1.069	22.928	0	109	32.248	80.422	0.908	24.515	1903	1.387	0.721	0.971	#REF!
507	CEP19_KAN631-15_4.tif:0010-0728	1.456	17.584	0	130	53.671	82.69	0.935	25.597	1987	1.328	0.753	0.958	#REF!
508	CEP19_KAN631-15_4.tif:0011-0756	1.597	22.315	0	88	127.449	85.854	0.917	35.645	2767	1.271	0.787	0.919	#REF!
509	CEP19_KAN631-15_4.tif:0012-0766	1.198	24	0	168	35.587	86.94	0.895	28.753	2232	1.29	0.775	0.935	#REF!
510	CEP19_KAN631-15_4.tif:0013-0778	1.585	48.35	0	183	75.952	88.373	0.895	76.611	5947	1.242	0.805	0.939	#REF!
511	CEP19_KAN631-15_4.tif:0014-0872	1.546	21.925	0	104	53.135	98.966	0.952	33.893	2631	1.095	0.913	0.938	#REF!
512	CEP19_KAN631-15_4.tif:0015-0919	1.456	13.354	0	69	135.678	104.285	0.881	19.439	1509	1.251	0.8	0.926	#REF!
513	CEP19_KAN631-15_4.tif:0016-0930	2.151	26.461	0	167	94.464	105.67	0.716	56.927	4419	2.479	0.403	0.946	#REF!
514	CEP19_KAN631-15_4.tif:0017-0963	1.069	50.024	0	137	142.9	109.352	0.94	53.487	4152	1.237	0.809	0.971	#REF!
515	CEP19_KAN631-15_4.tif:0018-0999	0.76	20.644	0	65	6.578	113.405	0.994	15.691	1218	1.112	0.899	0.967	#REF!
516	CEP19_KAN631-15_4.tif:0019-1105	1.082	30.893	0	90	46.788	125.409	0.846	33.429	2595	1.582	0.632	0.939	#REF!
517	CEP19_KAN631-15_4.tif:0020-1224	1.314	12.029	0	48	54.089	138.905	0.921	15.807	1227	1.17	0.855	0.967	#REF!
										4781.85				#REF!

## Sheet: IF condition
Exp. number	Cell line	Culture condition	Fixation condition	rabbit-Alexa488	mouse IgG1-Alexa568	mouse IgG2b-Alexa647	Nuclear stain	Date	Replicate
KAN631-1	RPE-BFP-Cas9 pMCB306 (pool)	serum starved for 24 hours	fixed in 4% PFA at RT for 15 mintues	CEP19, CA5883, in house, 1:1000	CEP170, Invitrogen, 41-3200, 1:1000	Ac-Tub, 6B-11, Santa Cruz, 1:1000	DAPI	No.6	2021-03-17
KAN631-15	RPE-BFP-Cas9 FOP KO (pool)	serum starved for 24 hours	fixed in 4% PFA at RT for 15 mintues	CEP19, CA5883, in house, 1:1000	CEP170, Invitrogen, 41-3200, 1:1000	Ac-Tub, 6B-11, Santa Cruz, 1:1000	DAPI	No.6	2021-03-17
