# Supplementary material for: A hierarchical pathway for assembly of the distal appendages that organize primary cilia
Source: eLife. 2025 Jan 30;14:e85999. doi: 10.7554/eLife.85999 (PMC11984956; doi:10.7554/eLife.85999)
Supplement: Figure 4—source data 9. [file elife-85999-fig4-data9.xlsx]

## Sheet: Raw data
	Label	Area	Mean	Min	Max	X	Y	Circ	IntDen	RawIntDen	AR	Round	Solidity
	sgGFP
499	IFT88_KAN627-1_1.tif:0001-0023	0.876	62	0	454	126.621	2.599	0.956	54.312	4216	1.132	0.883	0.971	0.350814
500	IFT88_KAN627-1_1.tif:0002-0034	0.915	116.141	0	421	14.059	3.913	0.715	106.227	8246	1.794	0.557	0.835	0.686151
501	IFT88_KAN627-1_1.tif:0003-0036	1.198	208	0	849	54.999	4.124	0.937	249.194	19344	1.254	0.797	0.974	1.60962
502	IFT88_KAN627-1_1.tif:0004-0074	1.043	26.951	0	113	33.249	8.45	0.985	28.122	2183	1.238	0.808	0.959	0.181648
503	IFT88_KAN627-1_1.tif:0005-0167	0.438	4.853	0	32	77.748	18.955	1	2.126	165	1.141	0.876	0.971	0.0137297
504	IFT88_KAN627-1_1.tif:0006-0199	1.868	119.903	0	861	112.261	22.676	0.806	223.971	17386	1.714	0.584	0.912	1.44669
505	IFT88_KAN627-1_1.tif:0007-0215	0.631	200.367	1	656	25.14	24.459	0.935	126.478	9818	1	1	1	0.816957
506	IFT88_KAN627-1_1.tif:0008-0275	1.855	92.528	0	638	57.513	31.283	0.755	171.643	13324	1.94	0.515	0.892	1.10869
507	IFT88_KAN627-1_1.tif:0009-0367	1.327	141.738	0	782	83.541	41.65	0.709	188.068	14599	1.727	0.579	0.834	1.21478
508	IFT88_KAN627-1_1.tif:0010-0423	1.623	86.365	0	545	55.556	48.065	0.804	140.185	10882	1.613	0.62	0.887	0.905493
509	IFT88_KAN627-1_1.tif:0011-0442	1.469	108.456	0	624	93.751	50.205	0.755	159.276	12364	1.727	0.579	0.857	1.02881
510	IFT88_KAN627-1_1.tif:0012-0509	1.572	113.082	0	800	85.332	57.843	0.758	177.724	13796	1.691	0.592	0.865	1.14797
511	IFT88_KAN627-1_1.tif:0013-0635	0.631	155.592	15	537	83.706	72.129	0.935	98.214	7624	1	1	1	0.634394
512	IFT88_KAN627-1_1.tif:0014-0660	0.992	26.675	0	120	132.234	74.915	0.951	26.46	2054	1.25	0.8	0.981	0.170914
513	IFT88_KAN627-1_1.tif:0015-0675	1.198	205.86	0	851	82.441	76.659	0.937	246.631	19145	1.242	0.805	0.969	1.59306
514	IFT88_KAN627-1_1.tif:0016-0704	1.507	98.855	0	547	29.553	79.883	0.755	148.996	11566	1.552	0.644	0.87	0.962409
515	IFT88_KAN627-1_1.tif:0017-0939	0.85	146.97	0	524	64.16	106.568	0.846	124.958	9700	1.522	0.657	0.904	0.807138
516	IFT88_KAN627-1_1.tif:0018-1039	1.069	115.169	0	431	45.795	117.97	0.836	123.141	9559	1.5	0.666	0.917	0.795406
517	IFT88_KAN627-1_1.tif:0019-1077	1.559	88.521	0	493	99.413	122.342	0.714	137.982	10711	1.665	0.601	0.849	0.891264
518	IFT88_KAN627-1_1.tif:0020-1091	1.185	166.652	0	775	123.001	123.829	0.945	197.511	15332	1.376	0.727	0.934	1.27578
519	IFT88_KAN627-1_1.tif:0021-1186	0.76	105.525	0	323	8.844	134.602	0.953	80.205	6226	1.109	0.902	0.959	0.518066
520	IFT88_KAN627-1_2.tif:0001-0040	1.52	120.195	0	830	124.457	4.574	0.803	182.709	14183	1.278	0.783	0.884	1.18017
521	IFT88_KAN627-1_2.tif:0002-0121	1.262	197.429	0	971	50.653	13.761	0.913	249.246	19348	1.379	0.725	0.956	1.60995
522	IFT88_KAN627-1_2.tif:0003-0319	0.631	207.102	6	639	17.876	36.263	0.935	130.729	10148	1	1	1	0.844417
523	IFT88_KAN627-1_2.tif:0004-0362	1.456	106.752	0	567	107.799	41.119	0.871	155.399	12063	1.586	0.631	0.93	1.00376
524	IFT88_KAN627-1_2.tif:0005-0380	0.902	209.8	0	721	109.528	43.187	0.947	189.189	14686	1.146	0.873	0.986	1.22202
525	IFT88_KAN627-1_2.tif:0006-0470	0.593	111.565	0	558	83.033	53.407	0.964	66.112	5132	1.15	0.87	0.968	0.427034
526	IFT88_KAN627-1_2.tif:0007-0594	1.211	133.766	0	590	125.964	67.512	0.934	161.981	12574	1.327	0.753	0.945	1.04628
527	IFT88_KAN627-1_2.tif:0008-0652	0.322	124.84	22	288	58.396	74.059	1	40.206	3121	1	1	1	0.259699
528	IFT88_KAN627-1_2.tif:0009-0765	1.559	106.19	0	641	96.912	86.881	0.793	165.524	12849	1.651	0.606	0.874	1.06917
529	IFT88_KAN627-1_2.tif:0010-0969	0.824	175.406	0	594	129.617	109.982	0.914	144.616	11226	1	1	1	0.934117
530	IFT88_KAN627-1_2.tif:0011-1098	0.721	179.536	0	589	43.527	124.623	0.92	129.518	10054	1.143	0.875	1	0.836595
531	IFT88_KAN627-1_3.tif:0001-0033	0.721	17.554	0	77	9.421	3.756	0.985	12.663	983	1.229	0.814	0.949	0.0817956
532	IFT88_KAN627-1_3.tif:0002-0050	1.378	198.579	0	1161	52.726	5.734	0.953	273.722	21248	1.11	0.901	0.947	1.76805
533	IFT88_KAN627-1_3.tif:0003-0061	0.696	34.296	0	148	78.332	6.902	0.836	23.858	1852	1.82	0.549	0.947	0.154105
534	IFT88_KAN627-1_3.tif:0004-0074	0.631	192.449	0	476	51.699	8.456	0.935	121.48	9430	1	1	1	0.784672
535	IFT88_KAN627-1_3.tif:0005-0242	1.366	104.425	0	548	122.986	27.465	0.851	142.594	11069	1.381	0.724	0.902	0.921053
536	IFT88_KAN627-1_3.tif:0006-0263	1.224	233.653	0	1080	22.297	29.895	0.897	285.947	22197	1.225	0.816	0.979	1.84702
537	IFT88_KAN627-1_3.tif:0007-0271	1.018	127.152	0	393	65.174	30.837	0.807	129.402	10045	1.798	0.556	0.969	0.835846
538	IFT88_KAN627-1_3.tif:0008-0377	1.791	140.82	0	1059	48.046	42.786	0.765	252.157	19574	1.719	0.582	0.874	1.62876
539	IFT88_KAN627-1_3.tif:0009-0389	1.881	103.534	0	791	73.701	44.185	0.654	194.728	15116	1.809	0.553	0.802	1.2578
540	IFT88_KAN627-1_3.tif:0010-0399	0.322	7.24	0	33	25.821	45.343	1	2.332	181	1	1	1	0.015061
541	IFT88_KAN627-1_3.tif:0011-0473	1.713	107.662	0	708	95.064	53.763	0.848	184.461	14319	1.623	0.616	0.92	1.19149
542	IFT88_KAN627-1_3.tif:0012-0503	2.048	375.679	0	1812	32.759	57.14	0.915	769.496	59733	1.055	0.948	0.972	4.97039
543	IFT88_KAN627-1_3.tif:0013-0612	0.812	209.492	0	781	55.268	69.468	0.937	170.02	13198	1.039	0.963	0.992	1.09821
544	IFT88_KAN627-1_3.tif:0014-0620	1.095	40.141	0	178	4.125	70.412	0.916	43.954	3412	1.37	0.73	0.929	0.283913
545	IFT88_KAN627-1_3.tif:0015-0741	1.159	137.767	0	643	111.006	84.106	1	159.727	12399	1.139	0.878	0.957	1.03172
546	IFT88_KAN627-1_3.tif:0016-0825	1.804	349.914	0	1957	42.115	93.685	0.979	631.076	48988	1.104	0.905	0.966	4.0763
547	IFT88_KAN627-1_3.tif:0017-0934	0.773	191.783	0	644	84.372	106.087	0.929	148.236	11507	1.305	0.766	0.984	0.957499
548	IFT88_KAN627-1_3.tif:0018-0997	1.494	133.043	0	657	46.459	113.138	0.821	198.812	15433	1.7	0.588	0.917	1.28418
549	IFT88_KAN627-1_3.tif:0019-1046	0.953	104.635	0	482	23.323	118.667	0.668	99.747	7743	1.988	0.503	0.813	0.644296
550	IFT88_KAN627-1_3.tif:0020-1094	0.863	11.09	0	60	95.573	124.221	0.98	9.572	743	1.211	0.826	0.971	0.0618251
551	IFT88_KAN627-1_4.tif:0001-0078	0.451	29.914	0	174	49.494	8.845	0.991	13.488	1047	1.065	0.939	0.986	0.087121
552	IFT88_KAN627-1_4.tif:0002-0118	0.812	171.952	2	446	125.298	13.387	0.937	139.553	10833	1.039	0.963	0.992	0.901416
553	IFT88_KAN627-1_4.tif:0003-0202	1.121	248.011	0	1031	106.684	22.979	0.951	277.96	21577	1.114	0.897	0.983	1.79543
554	IFT88_KAN627-1_4.tif:0004-0215	0.721	198.357	8	438	8.456	24.403	0.92	143.096	11108	1.143	0.875	1	0.924298
555	IFT88_KAN627-1_4.tif:0005-0477	1.237	120.438	0	594	73.354	54.136	0.771	148.945	11562	1.728	0.579	0.861	0.962076
556	IFT88_KAN627-1_4.tif:0006-0541	0.915	139.535	0	591	25.02	61.449	0.91	127.624	9907	1.309	0.764	0.934	0.824363
557	IFT88_KAN627-1_4.tif:0007-0684	0.915	226.225	0	665	13.058	77.697	0.924	206.915	16062	1.13	0.885	0.993	1.33652
558	IFT88_KAN627-1_4.tif:0008-0692	0.902	205.014	5	698	135.53	78.599	0.947	184.873	14351	1.125	0.889	0.986	1.19415
559	IFT88_KAN627-1_4.tif:0009-0736	1.288	164.86	0	969	111.945	83.503	0.932	212.377	16486	1.331	0.751	0.976	1.3718
560	IFT88_KAN627-1_4.tif:0010-0847	1.211	121.862	0	678	35.914	96.174	0.837	147.566	11455	1.589	0.629	0.917	0.953172
561	IFT88_KAN627-1_4.tif:0011-0863	1.378	176.187	0	953	86.755	98.023	0.924	242.856	18852	1.499	0.667	0.96	1.56868
562	IFT88_KAN627-1_4.tif:0012-0922	0.721	227.196	11	1047	61.404	104.704	0.92	163.901	12723	1.143	0.875	1	1.05868
563	IFT88_KAN627-1_4.tif:0013-1014	0.631	181.143	0	952	60.212	115.146	0.935	114.343	8876	1	1	1	0.738573
564	IFT88_KAN627-1_4.tif:0014-1027	0.528	20.829	0	162	6.576	116.63	0.968	11.001	854	1.176	0.85	0.988	0.0710615
565	IFT88_KAN627-1_4.tif:0015-1100	0.76	98.22	0	413	117.389	124.907	0.953	74.653	5795	1.297	0.771	0.967	0.482203
566	IFT88_KAN627-1_4.tif:0016-1146	0.386	97.533	0	270	47.046	130.071	0.976	37.693	2926	1.2	0.833	1	0.243473
										12017.8				1
	FOP KO
367	IFT88_KAN627-15_1.tif:0001-0094	1.829	286.035	0	835	31.511	10.671	0.941	523.238	40617	1.281	0.781	0.969	3.37975
368	IFT88_KAN627-15_1.tif:0002-0116	0.605	80.298	0	242	67.831	13.223	0.985	48.618	3774	1.002	0.998	0.979	0.314035
369	IFT88_KAN627-15_1.tif:0003-0118	1.546	101.45	0	390	123.741	13.415	0.909	156.829	12174	1.147	0.872	0.96	1.013
370	IFT88_KAN627-15_1.tif:0004-0159	0.747	87.897	0	249	12.385	18.035	0.936	65.674	5098	1.077	0.928	0.951	0.424205
371	IFT88_KAN627-15_1.tif:0005-0165	1.043	112.395	0	284	37.405	18.732	0.95	117.28	9104	1.398	0.716	0.97	0.757545
372	IFT88_KAN627-15_1.tif:0006-0323	0.979	105.724	0	275	57.079	36.716	0.959	103.509	8035	1.364	0.733	0.938	0.668594
373	IFT88_KAN627-15_1.tif:0007-0341	0.631	91.612	0	284	76.912	38.686	0.918	57.828	4489	1.368	0.731	0.942	0.37353
374	IFT88_KAN627-15_1.tif:0008-0376	0.451	66.086	0	121	15.087	42.684	0.991	29.797	2313	1.065	0.939	0.986	0.192465
375	IFT88_KAN627-15_1.tif:0009-0422	0.953	127.054	0	324	88.55	47.978	0.948	121.119	9402	1.127	0.887	0.974	0.782342
376	IFT88_KAN627-15_1.tif:0010-0546	0.322	104.8	13	225	32.177	62.028	1	33.752	2620	1	1	1	0.218011
377	IFT88_KAN627-15_1.tif:0011-0586	0.928	53.014	0	122	75.189	66.561	0.996	49.172	3817	1.09	0.918	0.954	0.317613
378	IFT88_KAN627-15_1.tif:0012-0781	0.94	98.37	0	284	141.106	88.713	1	92.507	7181	1.016	0.984	0.961	0.597532
379	IFT88_KAN627-15_1.tif:0013-0794	1.237	127.135	0	420	101.597	90.138	0.924	157.228	12205	1.148	0.871	0.941	1.01558
380	IFT88_KAN627-15_1.tif:0014-0872	0.786	102.934	9	285	55.298	99.012	0.825	80.888	6279	1.9	0.526	0.961	0.522477
381	IFT88_KAN627-15_1.tif:0015-0922	1.134	103.602	0	333	89.675	104.7	0.875	117.447	9117	1.419	0.705	0.921	0.758627
382	IFT88_KAN627-15_1.tif:0016-0984	0.593	112.261	22	217	137.399	111.733	1	66.524	5164	1.052	0.95	0.968	0.429697
383	IFT88_KAN627-15_1.tif:0017-1044	0.876	87.456	0	232	30.532	118.562	0.956	76.611	5947	1.149	0.87	0.971	0.494851
384	IFT88_KAN627-15_1.tif:0018-1133	0.528	100.561	10	257	36.028	128.602	0.968	53.114	4123	1.176	0.85	0.988	0.343075
385	IFT88_KAN627-15_1.tif:0019-1156	0.593	37.717	0	73	70.496	131.191	0.92	22.351	1735	1.363	0.734	0.979	0.14437
386	IFT88_KAN627-15_1.tif:0020-1210	0.438	34.824	0	87	139.151	137.335	1	15.253	1184	1.141	0.876	0.971	0.0985208
387	IFT88_KAN627-15_1.tif:0021-1226	0.605	61.638	0	155	104.59	139.208	0.985	37.32	2897	1.104	0.906	0.979	0.24106
388	IFT88_KAN627-15_2.tif:0001-0047	0.85	23.333	0	105	107.237	5.39	0.965	19.839	1540	1.136	0.88	0.964	0.128144
389	IFT88_KAN627-15_2.tif:0002-0136	0.966	54.56	0	165	8.394	15.429	0.961	52.714	4092	1.244	0.804	0.968	0.340496
390	IFT88_KAN627-15_2.tif:0003-0214	0.837	118.785	0	465	89.715	24.272	0.99	99.464	7721	1.136	0.88	0.956	0.642466
391	IFT88_KAN627-15_2.tif:0004-0244	0.322	104.68	0	301	134.214	27.751	1	33.713	2617	1	1	1	0.217761
392	IFT88_KAN627-15_2.tif:0005-0412	0.876	56.897	0	249	114.817	46.772	0.956	49.841	3869	1.189	0.841	0.978	0.32194
393	IFT88_KAN627-15_2.tif:0006-0526	0.605	12.681	0	78	142.627	59.758	0.985	7.678	596	1.002	0.998	0.979	0.0495932
394	IFT88_KAN627-15_2.tif:0007-0532	0.605	77.021	0	306	14.812	60.439	0.985	46.634	3620	1.104	0.906	0.979	0.301221
395	IFT88_KAN627-15_2.tif:0008-0595	0.747	60.052	0	193	42.572	67.521	0.977	44.869	3483	1.229	0.814	0.959	0.289821
396	IFT88_KAN627-15_2.tif:0009-0705	1.378	90.86	0	380	32.495	80.039	0.757	125.241	9722	1.606	0.623	0.866	0.808969
397	IFT88_KAN627-15_2.tif:0010-0710	1.198	59.269	0	260	19.906	80.582	0.924	71.007	5512	1.362	0.734	0.939	0.458654
398	IFT88_KAN627-15_2.tif:0011-0751	1.7	117.333	0	553	112.762	85.245	0.851	199.52	15488	1.669	0.599	0.943	1.28876
399	IFT88_KAN627-15_2.tif:0012-0761	1.211	124.351	0	377	89.083	86.353	0.788	150.581	11689	1.612	0.62	0.879	0.972643
400	IFT88_KAN627-15_2.tif:0013-0852	0.876	54.368	0	251	73.82	96.69	0.956	47.626	3697	1.132	0.883	0.971	0.307628
401	IFT88_KAN627-15_2.tif:0014-0950	1.327	92.155	0	380	136.177	107.853	0.803	122.278	9492	1.5	0.667	0.888	0.789831
402	IFT88_KAN627-15_2.tif:0015-0961	1.855	840.653	0	7379	3.477	109.066	0.954	1559.45	121054	1.098	0.91	0.97	10.0729
403	IFT88_KAN627-15_2.tif:0016-1093	0.683	91.264	0	236	54.372	124.106	0.949	62.311	4837	1.208	0.828	0.972	0.402487
404	IFT88_KAN627-15_2.tif:0017-1179	0.528	61.024	0	193	14.067	133.865	0.968	32.231	2502	1.176	0.85	0.988	0.208192
405	IFT88_KAN627-15_2.tif:0018-1194	0.515	20.225	0	58	138.3	135.519	0.994	10.422	809	1.209	0.827	0.976	0.067317
406	IFT88_KAN627-15_2.tif:0019-1220	0.812	43.81	0	165	86.935	138.476	0.937	35.555	2760	1.039	0.963	0.992	0.22966
407	IFT88_KAN627-15_2.tif:0020-1236	0.915	32.338	0	124	43.425	140.324	0.982	29.578	2296	1.233	0.811	0.953	0.191051
408	IFT88_KAN627-15_3.tif:0001-0115	0.837	85.354	0	349	117.119	13.039	0.865	71.471	5548	1.608	0.622	0.909	0.46165
409	IFT88_KAN627-15_3.tif:0002-0117	0.747	33.897	0	111	48.361	13.28	0.977	25.327	1966	1.142	0.876	0.951	0.163591
410	IFT88_KAN627-15_3.tif:0003-0163	0.812	277.794	0	1590	140.961	18.507	0.937	225.452	17501	1.039	0.963	0.992	1.45626
411	IFT88_KAN627-15_3.tif:0004-0241	0.696	44.778	0	231	75.875	27.339	0.967	31.149	2418	1.139	0.878	0.982	0.201202
412	IFT88_KAN627-15_3.tif:0005-0247	0.631	208.898	0	915	87.225	28.091	0.935	131.863	10236	1	1	1	0.851739
413	IFT88_KAN627-15_3.tif:0006-0296	1.005	69.231	0	303	63.86	33.669	0.929	69.564	5400	1.086	0.921	0.987	0.449335
414	IFT88_KAN627-15_3.tif:0007-0424	1.043	66.099	0	229	88.183	48.118	0.936	68.972	5354	1.197	0.835	0.915	0.445507
415	IFT88_KAN627-15_3.tif:0008-0500	1.378	108.682	0	366	14.063	56.796	0.672	149.808	11629	1.91	0.524	0.82	0.967651
416	IFT88_KAN627-15_3.tif:0009-0546	0.618	90.354	0	230	64.291	62.035	0.96	55.87	4337	1.049	0.953	0.99	0.360882
417	IFT88_KAN627-15_3.tif:0010-0623	1.623	145.476	0	510	137.037	70.701	0.858	236.132	18330	1.481	0.675	0.913	1.52524
418	IFT88_KAN627-15_3.tif:0011-0677	1.237	518.104	0	4222	65.252	76.838	0.936	640.737	49738	1.049	0.953	0.98	4.13871
419	IFT88_KAN627-15_3.tif:0012-0682	1.7	554.083	0	4828	136.207	77.398	0.961	942.195	73139	1.134	0.882	0.971	6.08591
420	IFT88_KAN627-15_3.tif:0013-0707	0.863	45.373	0	147	44.53	80.24	0.98	39.162	3040	1.159	0.863	0.971	0.252959
421	IFT88_KAN627-15_3.tif:0014-0744	0.541	89.571	0	226	77.748	84.501	0.943	48.463	3762	1.167	0.857	1	0.313037
422	IFT88_KAN627-15_3.tif:0015-0796	0.709	20.673	0	65	17.303	90.353	0.943	14.647	1137	1.15	0.87	0.991	0.0946099
423	IFT88_KAN627-15_3.tif:0016-0892	0.593	104.63	0	294	59.511	101.318	0.964	62.002	4813	1.136	0.88	0.979	0.40049
424	IFT88_KAN627-15_3.tif:0017-1072	1.056	135.902	0	408	106.452	121.737	0.928	143.56	11144	1.266	0.79	0.959	0.927294
425	IFT88_KAN627-15_4.tif:0001-0059	1.018	64.405	0	234	14.332	6.733	0.835	65.545	5088	1.759	0.568	0.975	0.423373
426	IFT88_KAN627-15_4.tif:0002-0136	1.185	63.348	0	238	57.982	15.517	0.945	75.078	5828	1.165	0.859	0.934	0.484949
427	IFT88_KAN627-15_4.tif:0003-0228	0.76	50.797	0	129	121.265	25.948	0.953	38.608	2997	1.329	0.752	0.975	0.249381
428	IFT88_KAN627-15_4.tif:0004-0262	0.889	102.986	0	301	76.551	29.731	0.933	91.541	7106	1.172	0.853	0.979	0.591291
429	IFT88_KAN627-15_4.tif:0005-0399	0.94	57.945	0	156	54.991	45.332	0.972	54.492	4230	1.173	0.852	0.954	0.351979
430	IFT88_KAN627-15_4.tif:0006-0487	0.58	62.333	0	124	1.923	55.268	0.943	36.135	2805	1.388	0.72	0.968	0.233404
431	IFT88_KAN627-15_4.tif:0007-0669	0.786	92.508	0	384	19.88	75.998	0.892	72.695	5643	1.429	0.7	0.924	0.469555
432	IFT88_KAN627-15_4.tif:0008-0718	0.721	331.804	0	1939	43.698	81.55	0.92	239.365	18581	1.143	0.875	1	1.54613
433	IFT88_KAN627-15_4.tif:0009-0789	0.464	114.25	0	220	54.253	89.552	0.965	52.985	4113	1	1	1	0.342243
434	IFT88_KAN627-15_4.tif:0010-0817	1.739	494.852	0	4010	126.215	92.725	0.955	860.599	66805	1.083	0.923	0.975	5.55885
435	IFT88_KAN627-15_4.tif:0011-0853	0.58	47.444	0	222	80.642	96.872	1	27.504	2135	1	1	0.957	0.177654
436	IFT88_KAN627-15_4.tif:0012-1073	1.108	53.895	0	206	100.88	121.786	0.671	59.709	4635	2.081	0.481	0.804	0.385679
437	IFT88_KAN627-15_4.tif:0013-1179	0.593	85.652	0	270	39.498	133.817	0.964	50.756	3940	1.351	0.74	0.979	0.327848
438	IFT88_KAN627-15_4.tif:0014-1237	1.829	313.585	0	1910	38.945	140.449	0.966	573.634	44529	1.104	0.906	0.969	3.70526
439	IFT88_KAN627-15_4.tif:0015-1255	0.631	192.531	0	933	119.913	142.499	0.935	121.531	9434	1	1	1	0.785005
										10849.8				0.90281

## Sheet: IF condition
Exp. number	Cell line	Culture condition	Fixation condition	rabbit-Alexa488	mouse IgG1-Alexa568	mouse IgG2b-Alexa647	Nuclear stain	Date	Replicate
KAN627-1	RPE-BFP-Cas9 pMCB306 (pool)	serum starved for 24 hours	fixed in 4% PFA at RT for 15 mintues	IFT88, Proteintech, 13967-1-AP, 1:1000	CEP170, Invitrogen, 41-3200, 1:1000	Ac-Tub, 6B-11, Santa Cruz, 1:1000	DAPI	No.6	2021-03-10
KAN627-15	RPE-BFP-Cas9 FOP KO (pool)	serum starved for 24 hours	fixed in 4% PFA at RT for 15 mintues	IFT88, Proteintech, 13967-1-AP, 1:1000	CEP170, Invitrogen, 41-3200, 1:1000	Ac-Tub, 6B-11, Santa Cruz, 1:1000	DAPI	No.6	2021-03-10
