# Supplementary material for: A hierarchical pathway for assembly of the distal appendages that organize primary cilia
Source: eLife. 2025 Jan 30;14:e85999. doi: 10.7554/eLife.85999 (PMC11984956; doi:10.7554/eLife.85999)
Supplement: Figure 4—source data 10. [file elife-85999-fig4-data10.xlsx]

## Sheet: Raw data
Replicate 1
sgGFP (pMCB306)							LRRC45 KO							FOP KO							sgIFT52							sgSafe
	Rab34+ centriole	cell counts	Dot	Extension	tunnel?	preciliary vesicle??		Rab34+ centriole	cell counts	Dot	Extension	tunnel?	preciliary vesicle??		Rab34+ centriole	cell counts	Dot	Extension	tunnel?	preciliary vesicle??		Rab34+ centriole	cell counts	Dot	Extension	tunnel?	preciliary vesicle??		Rab34+ centriole	cell counts	Dot	Extension	tunnel?	preciliary vesicle??				pMCB306	LRRC45 KO	FOP KO	sgIFT52	sgSafe
KAN646-1		12	3				KAN646-2		17	3				KAN646-3		16	9				KAN646-4		21	5				KAN646-5		17	2							36.0825	26.8908	48.4615	25.3086	22.5352
2		11	3				2		15	5				2		22	12				2		20	7				2		16	6	1						23.7288	17.8808	50.3937	15.1724	17.3611
3		14	4				3		15	3				3		14	8				3		20	3				3		17	1							29.3651	15.1515	37.3333	18.705	21.2121
4		12	5	2			4		21	1	1			4		17	9	1			4		15	2				4		17	7	1						28.5714	26.257	49.5868	21.6667	18
5		13	2	1			5		14	8				5		17	5				5		19	5	1			5		15	3							27.0492	21.831	39.0244		16.5354
6		9	6				6		15	4				6		15	5	2			6		23	3	1			6		20	2
7		13	5				7		11	3				7		15	6				7		24	8	1			7		18	5
8		13	3	1			8		11	4				8		14	6				8		20	5				8		22	4
9							9							9							9							9
10							10							10							10							10
	35	97	31	4	0	0		32	119	31	1	0	0		63	130	60	3	0	0		41	162	38	3	0	0		32	142	30	2	0	0
		36.0825	31.9588	4.12371					26.8908	26.0504	0.840336					48.4615	46.1538	2.30769					25.3086	23.4568	1.85185					22.5352	21.1268	1.40845
Replicate 2
	Rab34+ centriole	cell counts	Dot	Extension	tunnel?	preciliary vesicle??		Rab34+ centriole	cell counts	Dot	Extension	tunnel?	preciliary vesicle??		Rab34+ centriole	cell counts	Dot	Extension	tunnel?	preciliary vesicle??		Rab34+ centriole	cell counts	Dot	Extension	tunnel?	preciliary vesicle??		Rab34+ centriole	cell counts	Dot	Extension
KAN646-6		15	4	1			KAN646-7		20	2				KAN646-8		12	6				KAN646-9		21	2				KAN646-10		17	6
2		15	5				2		15	1	1			2		17	6				2		18	2				2		16	2
3		11	2				3		16	2				3		20	8				3		16	1				3		21	6
4		13	2				4		24	4				4		14	3				4		18	5				4		17	2
5		20	5				5		22	5	1			5		16	10	1			5		22	3				5		16	3
6		14	2	2			6		21	3				6		16	11	1			6		18	5				6		17	2	1
7		14	4				7		18	4				7		12	5				7		16	2				7		20	2
8		16	1				8		15	3	1			8		20	13				8		16	2				8		20	1
9							9							9							9							9
10							10							10							10							10						0
	28	118	25	3	0	0		27	151	24	3	0	0		64	127	62	2	0	0		22	145	22	0	0	0		25	144	24	1	0	0
		23.7288	21.1864	2.54237					17.8808	15.894	1.98675					50.3937	48.8189	1.5748					15.1724	15.1724	0					17.3611	16.6667	0.694444
Replicate 3
	Rab34+ centriole	cell counts	Dot	Extension	tunnel?	preciliary vesicle??		Rab34+ centriole	cell counts	Dot	Extension	tunnel?	preciliary vesicle??		Rab34+ centriole	cell counts	Dot	Extension	tunnel?	preciliary vesicle??		Rab34+ centriole	cell counts	Dot	Extension	tunnel?	preciliary vesicle??		Rab34+ centriole	cell counts	Dot	Extension	tunnel?	preciliary vesicle??
KAN646-11		14	5				KAN646-12		14	3				KAN646-13		18	7	2			KAN646-14		15	3				KAN646-15		19	2
2		18	7	1			2		20	3				2		18	5				2		16	3				2		13	3
3		12	3				3		15	1				3		18	6				3		21	4	1			3		20	2	1
4		16	4				4		19	1				4		15	3	1			4		19	5				4		13	3
5		16	4				5		15	0				5		15	7				5		19	2	1			5		17	1
6		17	3				6		13	3				6		19	6				6		17	2				6		16	4
7		14	5				7		16	5				7		14	5				7		16	3				7		19	4
8		19	5				8		20	4				8		16	5				8		16	1	1			8		15	8
9							9							9		17	9				9							9
10							10							10							10							10
	37	126	36	1	0	0		20	132	20	0	0	0		56	150	53	3	0	0		26	139	23	3	0	0		28	132	27	1	0	0
		29.3651	28.5714	0.793651					15.1515	15.1515	0					37.3333	35.3333	2					18.705	16.5468	2.15827					21.2121	20.4545	0.757576
Replicate 4
	Rab34+ centriole	cell counts	Dot	Extension	tunnel?	preciliary vesicle??		Rab34+ centriole	cell counts	Dot	Extension	tunnel?	preciliary vesicle??		Rab34+ centriole	cell counts	Dot	Extension	tunnel?	preciliary vesicle??		Rab34+ centriole	cell counts	Dot	Extension	tunnel?	preciliary vesicle??		Rab34+ centriole	cell counts	Dot	Extension	tunnel?	preciliary vesicle??
KAN668-1		18	3	1			KAN668-2		23	5				KAN668-3		18	8	2			KAN668-4		25	4				KAN668-5		16	2	1
2		18	2	2			2		24	5	1			2		14	10				2		20	1	2			2		19	5
3		15	5				3		23	6				3		14	6				3		22	8				3		22	3
4		20	7	1			4		26	6	1			4		17	9				4		20	4	2			4		19	4
5		22	3				5		21	8				5							5		22	3	1			5		16	4
6		12	6				6		19	6				6		19	4	2			6		21	4				6		22	3
7							7		23	1	1			7		16	8	1			7		25	5	1			7		15	1	1
8							8		20	7				8		23	10				8		25	4				8		21	1	2
9							9							9							9							9
10							10							10							10							10
	30	105	26	4	0	0		47	179	44	3	0	0		60	121	55	5	0	0		39	180	33	6	0	0		27	150	23	4	0	0
		28.5714	24.7619	3.80952					26.257	24.581	1.67598					49.5868	45.4545	4.13223					21.6667	18.3333	3.33333					18	15.3333	2.66667
Replicate 5
	Rab34+ centriole	cell counts	Dot	Extension	tunnel?	preciliary vesicle??		Rab34+ centriole	cell counts	Dot	Extension	tunnel?	preciliary vesicle??		Rab34+ centriole	cell counts	Dot	Extension	tunnel?	preciliary vesicle??									Rab34+ centriole	cell counts	Dot	Extension	tunnel?	preciliary vesicle??
KAN668-6		17	6				KAN668-7		21	5				KAN668-8		13	3											KAN668-9		11	3
2		13	2				2		14	4				2		21	9											2		14	4
3		16	3	1			3		20	2				3		11	6											3		16	1
4		10	2				4		14	2				4		17	6											4		17	3
5		12	4				5		17	2				5		16	3	2										5		19	2
6		20	4	2			6		21	3	1			6		14	6											6		17	2
7		18	6				7		19	5				7		15	6											7		13	2
8		16	3				8		16	6	1			8		16	6	1										8		20	3	1
9							9							9														9
10							10							10														10
	33	122	30	3	0	0		31	142	29	2	0	0		48	123	45	3	0	0									21	127	20	1	0	0
		27.0492	24.5902	2.45902					21.831	20.4225	1.40845					39.0244	36.5854	2.43902												16.5354	15.748	0.787402

## Sheet: IF condition
Exp. number	Cell line	Culture condition	Fixation condition	Mouse IgG2a-Alexa488	Rabbit-Alexa568	mouse IgG1-Alexa647	Nuclear stain	Date	Replicate
Rep.1
KAN646-1	RPE-BFP-Cas9 pMCB306 (pool)		confluent, Fixed in 4% PFA at RT for 15 minutes.	Myosin Va, sc-365986, Santa Cruz, 1:1000	Rab34, 27435-1-AP, Proteintech, 1:1000	CEP170, Invitrogen, 41-3200, 1:1000	DAPI	2021-05-10	No.1
KAN646-2	RPE-BFP-Cas9 LRRC45 KO (pool)		confluent, Fixed in 4% PFA at RT for 15 minutes.	Myosin Va, sc-365986, Santa Cruz, 1:1000	Rab34, 27435-1-AP, Proteintech, 1:1000	CEP170, Invitrogen, 41-3200, 1:1000	DAPI	2021-05-10	No.1
KAN646-3	RPE-BFP-Cas9 FOP KO (pool)		confluent, Fixed in 4% PFA at RT for 15 minutes.	Myosin Va, sc-365986, Santa Cruz, 1:1000	Rab34, 27435-1-AP, Proteintech, 1:1000	CEP170, Invitrogen, 41-3200, 1:1000	DAPI	2021-05-10	No.1
KAN646-4	RPE-BFP-Cas9 sgIFT52#1		confluent, Fixed in 4% PFA at RT for 15 minutes.	Myosin Va, sc-365986, Santa Cruz, 1:1000	Rab34, 27435-1-AP, Proteintech, 1:1000	CEP170, Invitrogen, 41-3200, 1:1000	DAPI	2021-05-10	No.1
KAN646-5	RPE-BFP-Cas9 sgSafe (pool)		confluent, Fixed in 4% PFA at RT for 15 minutes.	Myosin Va, sc-365986, Santa Cruz, 1:1000	Rab34, 27435-1-AP, Proteintech, 1:1000	CEP170, Invitrogen, 41-3200, 1:1000	DAPI	2021-05-10	No.1
Rep.2
KAN646-6	RPE-BFP-Cas9 pMCB306 (pool)		confluent, Fixed in 4% PFA at RT for 15 minutes.	Myosin Va, sc-365986, Santa Cruz, 1:1000	Rab34, 27435-1-AP, Proteintech, 1:1000	CEP170, Invitrogen, 41-3200, 1:1000	DAPI	2021-05-10	No.2
KAN646-7	RPE-BFP-Cas9 LRRC45 KO (pool)		confluent, Fixed in 4% PFA at RT for 15 minutes.	Myosin Va, sc-365986, Santa Cruz, 1:1000	Rab34, 27435-1-AP, Proteintech, 1:1000	CEP170, Invitrogen, 41-3200, 1:1000	DAPI	2021-05-10	No.2
KAN646-8	RPE-BFP-Cas9 FOP KO (pool)		confluent, Fixed in 4% PFA at RT for 15 minutes.	Myosin Va, sc-365986, Santa Cruz, 1:1000	Rab34, 27435-1-AP, Proteintech, 1:1000	CEP170, Invitrogen, 41-3200, 1:1000	DAPI	2021-05-10	No.2
KAN646-9	RPE-BFP-Cas9 sgIFT52#1		confluent, Fixed in 4% PFA at RT for 15 minutes.	Myosin Va, sc-365986, Santa Cruz, 1:1000	Rab34, 27435-1-AP, Proteintech, 1:1000	CEP170, Invitrogen, 41-3200, 1:1000	DAPI	2021-05-10	No.2
KAN646-10	RPE-BFP-Cas9 sgSafe (pool)		confluent, Fixed in 4% PFA at RT for 15 minutes.	Myosin Va, sc-365986, Santa Cruz, 1:1000	Rab34, 27435-1-AP, Proteintech, 1:1000	CEP170, Invitrogen, 41-3200, 1:1000	DAPI	2021-05-10	No.2
Rep.3
KAN646-11	RPE-BFP-Cas9 pMCB306 (pool)		confluent, Fixed in 4% PFA at RT for 15 minutes.	Myosin Va, sc-365986, Santa Cruz, 1:1000	Rab34, 27435-1-AP, Proteintech, 1:1000	CEP170, Invitrogen, 41-3200, 1:1000	DAPI	2021-05-10	No.3
KAN646-12	RPE-BFP-Cas9 LRRC45 KO (pool)		confluent, Fixed in 4% PFA at RT for 15 minutes.	Myosin Va, sc-365986, Santa Cruz, 1:1000	Rab34, 27435-1-AP, Proteintech, 1:1000	CEP170, Invitrogen, 41-3200, 1:1000	DAPI	2021-05-10	No.3
KAN646-13	RPE-BFP-Cas9 FOP KO (pool)		confluent, Fixed in 4% PFA at RT for 15 minutes.	Myosin Va, sc-365986, Santa Cruz, 1:1000	Rab34, 27435-1-AP, Proteintech, 1:1000	CEP170, Invitrogen, 41-3200, 1:1000	DAPI	2021-05-10	No.3
KAN646-14	RPE-BFP-Cas9 sgIFT52#1		confluent, Fixed in 4% PFA at RT for 15 minutes.	Myosin Va, sc-365986, Santa Cruz, 1:1000	Rab34, 27435-1-AP, Proteintech, 1:1000	CEP170, Invitrogen, 41-3200, 1:1000	DAPI	2021-05-10	No.3
KAN646-15	RPE-BFP-Cas9 sgSafe (pool)		confluent, Fixed in 4% PFA at RT for 15 minutes.	Myosin Va, sc-365986, Santa Cruz, 1:1000	Rab34, 27435-1-AP, Proteintech, 1:1000	CEP170, Invitrogen, 41-3200, 1:1000	DAPI	2021-05-10	No.3
Rep.4
KAN668-1	RPE-BFP-Cas9 pMCB306 (pool)		confluent, Fixed in 4% PFA at RT for 15 minutes.	Myosin Va, sc-365986, Santa Cruz, 1:1000	Rab34, 27435-1-AP, Proteintech, 1:1000	CEP170, Invitrogen, 41-3200, 1:1000	DAPI	2021-05-18	No.4
KAN668-2	RPE-BFP-Cas9 LRRC45 KO (pool)		confluent, Fixed in 4% PFA at RT for 15 minutes.	Myosin Va, sc-365986, Santa Cruz, 1:1000	Rab34, 27435-1-AP, Proteintech, 1:1000	CEP170, Invitrogen, 41-3200, 1:1000	DAPI	2021-05-18	No.4
KAN668-3	RPE-BFP-Cas9 FOP KO (pool)		confluent, Fixed in 4% PFA at RT for 15 minutes.	Myosin Va, sc-365986, Santa Cruz, 1:1000	Rab34, 27435-1-AP, Proteintech, 1:1000	CEP170, Invitrogen, 41-3200, 1:1000	DAPI	2021-05-18	No.4
KAN668-4	RPE-BFP-Cas9 sgIFT52#1		confluent, Fixed in 4% PFA at RT for 15 minutes.	Myosin Va, sc-365986, Santa Cruz, 1:1000	Rab34, 27435-1-AP, Proteintech, 1:1000	CEP170, Invitrogen, 41-3200, 1:1000	DAPI	2021-05-18	No.4
KAN668-5	RPE-BFP-Cas9 sgSafe (pool)		confluent, Fixed in 4% PFA at RT for 15 minutes.	Myosin Va, sc-365986, Santa Cruz, 1:1000	Rab34, 27435-1-AP, Proteintech, 1:1000	CEP170, Invitrogen, 41-3200, 1:1000	DAPI	2021-05-18	No.4
Rep.5
KAN668-6	RPE-BFP-Cas9 pMCB306 (pool)		confluent, Fixed in 4% PFA at RT for 15 minutes.	Myosin Va, sc-365986, Santa Cruz, 1:1000	Rab34, 27435-1-AP, Proteintech, 1:1000	CEP170, Invitrogen, 41-3200, 1:1000	DAPI	2021-05-18	No.5
KAN668-7	RPE-BFP-Cas9 LRRC45 KO (pool)		confluent, Fixed in 4% PFA at RT for 15 minutes.	Myosin Va, sc-365986, Santa Cruz, 1:1000	Rab34, 27435-1-AP, Proteintech, 1:1000	CEP170, Invitrogen, 41-3200, 1:1000	DAPI	2021-05-18	No.5
KAN668-8	RPE-BFP-Cas9 FOP KO (pool)		confluent, Fixed in 4% PFA at RT for 15 minutes.	Myosin Va, sc-365986, Santa Cruz, 1:1000	Rab34, 27435-1-AP, Proteintech, 1:1000	CEP170, Invitrogen, 41-3200, 1:1000	DAPI	2021-05-18	No.5
KAN668-9	RPE-BFP-Cas9 sgSafe (pool)		confluent, Fixed in 4% PFA at RT for 15 minutes.	Myosin Va, sc-365986, Santa Cruz, 1:1000	Rab34, 27435-1-AP, Proteintech, 1:1000	CEP170, Invitrogen, 41-3200, 1:1000	DAPI	2021-05-18	No.5

## Sheet: Statistics
Table Analyzed	Data 1		Table Analyzed	Data 1
Column E	sgSafe		Column E	sgSafe
vs.	vs.		vs.	vs.
Column D	sgIFT52		Column C	FOP KO
Unpaired t test with Welch's correction			Unpaired t test with Welch's correction
P value	0.6776		P value	0.0003
P value summary	ns		P value summary	***
Significantly different (P < 0.05)?	No		Significantly different (P < 0.05)?	Yes
One- or two-tailed P value?	Two-tailed		One- or two-tailed P value?	Two-tailed
Welch-corrected t, df	t=0.4427, df=4.703		Welch-corrected t, df	t=8.524, df=5.343
How big is the difference?			How big is the difference?
Mean of column D	20.21		Mean of column C	44.96
Mean of column E	19.13		Mean of column E	19.13
Difference between means (E - D) ± SEM	-1.084 ± 2.450		Difference between means (E - C) ± SEM	-25.83 ± 3.030
95% confidence interval	-7.503 to 5.334		95% confidence interval	-33.47 to -18.19
R squared (eta squared)	0.04001		R squared (eta squared)	0.9315
F test to compare variances			F test to compare variances
F, DFn, Dfd	2.747, 3, 4		F, DFn, Dfd	5.785, 4, 4
P value	0.3538		P value	0.1175
P value summary	ns		P value summary	ns
Significantly different (P < 0.05)?	No		Significantly different (P < 0.05)?	No
Data analyzed			Data analyzed
Sample size, column D	4		Sample size, column C	5
Sample size, column E	5		Sample size, column E	5
