# Supplementary material for: A hierarchical pathway for assembly of the distal appendages that organize primary cilia
Source: eLife. 2025 Jan 30;14:e85999. doi: 10.7554/eLife.85999 (PMC11984956; doi:10.7554/eLife.85999)
Supplement: Figure 5—figure supplement 1—source data 1. [file elife-85999-fig5-figsupp1-data1.xlsx]

## Sheet: Raw data
	Label	Area	Mean	IntDen	RawIntDen	Length
1	KAN700-1_1.tif:0003-0414-0799:c:3/4 - KAN700-1_1	0.541	1053.91	570.225	44264.4	4.751
2	KAN700-1_1.tif:0002-0529-0635:c:2/4 - KAN700-1_1	0.515	980.088	505.029	39203.5	4.445
3	KAN700-1_1.tif:0002-0217-0635:c:2/4 - KAN700-1_1	0.386	550.561	212.774	16516.8	3.338
4	KAN700-1_1.tif:0002-0261-0067:c:2/4 - KAN700-1_1	0.283	2366.37	670.651	52060.1	2.489
5	KAN700-1_1.tif:0002-0646-0177:c:2/4 - KAN700-1_1	0.283	1833.38	519.598	40334.4	2.437
6	KAN700-1_1.tif:0002-0880-0204:c:2/4 - KAN700-1_1	0.374	669.932	250.277	19428	3.2
7	KAN700-1_1.tif:0003-0695-1044:c:3/4 - KAN700-1_1	0.464	1399.07	648.833	50366.4	3.982
8	KAN700-1_1.tif:0003-1167-1123:c:3/4 - KAN700-1_1	0.464	1131.7	524.84	40741.3	4.063
9	KAN700-1_1.tif:0003-0681-0447:c:3/4 - KAN700-1_1	0.309	518.41	160.279	12441.8	2.64
10	KAN700-1_1.tif:0003-0215-0628:c:3/4 - KAN700-1_1	0.361	614.316	221.586	17200.9	3.088
11	KAN700-1_2.tif:0003-0119-0157:c:3/4 - KAN700-1_2	0.541	613.216	331.783	25755.1	4.744
12	KAN700-1_2.tif:0003-0200-0261:c:3/4 - KAN700-1_2	0.412	954.293	393.39	30537.4	3.564
13	KAN700-1_2.tif:0003-0409-0439:c:3/4 - KAN700-1_2	0.412	953.401	393.022	30508.8	3.526
14	KAN700-1_2.tif:0003-0470-0713:c:3/4 - KAN700-1_2	0.541	1278.69	691.842	53705.1	4.666
15	KAN700-1_2.tif:0003-0560-0471:c:3/4 - KAN700-1_2	0.386	1136.68	439.291	34100.5	3.354
16	KAN700-1_2.tif:0003-0362-0760:c:3/4 - KAN700-1_2	0.412	905.85	373.421	28987.2	3.593
17	KAN700-1_2.tif:0003-0600-1037:c:3/4 - KAN700-1_2	0.386	1124.85	434.719	33745.6	3.335
18	KAN700-1_2.tif:0003-0706-1070:c:3/4 - KAN700-1_2	0.258	277.698	71.548	5553.96	2.253
19	KAN700-1_2.tif:0003-0538-1226:c:3/4 - KAN700-1_2	0.348	893.549	310.795	24125.8	2.991
20	KAN700-1_2.tif:0003-0919-1173:c:3/4 - KAN700-1_2	0.605	1010.79	611.997	47507	5.306
21	KAN700-1_2.tif:0003-0971-0586:c:3/4 - KAN700-1_2	0.412	643.558	265.295	20593.9	3.599
22	KAN700-1_2.tif:0003-1077-0625:c:3/4 - KAN700-1_2	0.502	525.883	264.208	20509.4	4.576
23	KAN700-1_2.tif:0002-1132-0163:c:2/4 - KAN700-1_2	0.412	499.258	205.81	15976.3	3.564
24	KAN700-1_2.tif:0002-0963-0281:c:2/4 - KAN700-1_2	0.451	580.12	261.564	20304.2	3.914
25	KAN700-1_2.tif:0002-0097-0368:c:2/4 - KAN700-1_2	0.631	1288.05	813.058	63114.6	5.479
26	KAN700-1_2.tif:0002-0155-0832:c:2/4 - KAN700-1_2	0.361	1417.55	511.313	39691.3	3.092
27	KAN700-1_2.tif:0002-0282-1109:c:2/4 - KAN700-1_2	0.412	2117.75	873.004	67768	3.555
28	KAN700-1_2.tif:0002-0046-1010:c:2/4 - KAN700-1_2	0.49	906.587	443.797	34450.3	4.212
29	KAN700-1_2.tif:0002-1060-1027:c:2/4 - KAN700-1_2	0.438	1012.76	443.586	34433.9	3.788
30	KAN700-1_3.tif:0002-0363-0186:c:2/4 - KAN700-1_3	0.477	1583.65	754.837	58595.1	4.218
31	KAN700-1_3.tif:0002-0356-0365:c:2/4 - KAN700-1_3	0.399	1119.52	447.081	34705.2	3.432
32	KAN700-1_3.tif:0002-0580-0148:c:2/4 - KAN700-1_3	0.335	1184.58	396.763	30799.2	2.858
33	KAN700-1_3.tif:0002-0390-0691:c:2/4 - KAN700-1_3	0.477	1217.95	580.527	45064.1	4.185
34	KAN700-1_3.tif:0002-0183-0774:c:2/4 - KAN700-1_3	0.399	2339.2	934.157	72515.1	3.47
35	KAN700-1_3.tif:0002-0110-0968:c:2/4 - KAN700-1_3	0.258	1290.31	332.442	25806.2	2.22
36	KAN700-1_3.tif:0002-0154-1120:c:2/4 - KAN700-1_3	0.438	2374.98	1040.23	80749.3	3.807
37	KAN700-1_3.tif:0002-0525-0988:c:2/4 - KAN700-1_3	0.348	1654.05	575.312	44659.3	2.985
38	KAN700-1_3.tif:0002-0084-0484:c:2/4 - KAN700-1_3	0.386	1165.91	450.587	34977.3	3.331
39	KAN700-1_3.tif:0002-0080-0596:c:2/4 - KAN700-1_3	0.374	717.495	268.046	20807.4	3.259
40	KAN700-1_3.tif:0003-0441-0390:c:3/4 - KAN700-1_3	0.425	657.28	279.419	21690.2	3.67
41	KAN700-1_3.tif:0003-0621-0646:c:3/4 - KAN700-1_3	0.464	784.15	363.658	28229.4	4.003
42	KAN700-1_3.tif:0002-0991-0704:c:2/4 - KAN700-1_3	0.438	1272.55	557.371	43266.6	3.811
43	KAN700-1_3.tif:0002-1187-0145:c:2/4 - KAN700-1_3	0.567	754.847	427.862	33213.3	4.945
44	KAN700-1_3.tif:0002-1052-0497:c:2/4 - KAN700-1_3	0.425	836.868	355.765	27616.7	3.733
45	KAN700-1_3.tif:0003-0812-0803:c:3/4 - KAN700-1_3	0.296	794.87	235.513	18282	2.588
46	KAN700-1_3.tif:0003-1169-0869:c:3/4 - KAN700-1_3	0.206	1340.56	276.311	21449	1.767
47	KAN700-1_3.tif:0003-0775-1052:c:3/4 - KAN700-1_3	0.515	1074.31	553.583	42972.5	4.49
48	KAN700-1_3.tif:0003-0272-0041:c:3/4 - KAN700-1_3	0.399	671.519	268.171	20817.1	3.461
49	KAN700-1_4.tif:0002-0086-0034:c:2/4 - KAN700-1_4	0.49	2124.75	1040.12	80740.7	4.234
50	KAN700-1_4.tif:0002-0043-0265:c:2/4 - KAN700-1_4	0.399	1771.39	707.403	54913	3.52
51	KAN700-1_4.tif:0002-0440-0123:c:2/4 - KAN700-1_4	0.438	1290.34	565.163	43871.4	3.789
52	KAN700-1_4.tif:0002-0393-0274:c:2/4 - KAN700-1_4	0.232	1005.99	233.269	18107.7	2.031
53	KAN700-1_4.tif:0002-0552-0347:c:2/4 - KAN700-1_4	0.605	865.037	523.75	40656.7	5.281
54	KAN700-1_4.tif:0002-1233-0171:c:2/4 - KAN700-1_4	0.438	1408.75	617.028	47897.5	3.861
55	KAN700-1_4.tif:0002-0607-0669:c:2/4 - KAN700-1_4	0.502	2334.18	1172.71	91033.1	4.355
56	KAN700-1_4.tif:0002-0389-0462:c:2/4 - KAN700-1_4	0.361	667.09	240.621	18678.5	3.081
57	KAN700-1_4.tif:0002-0405-0704:c:2/4 - KAN700-1_4	0.386	979.786	378.655	29393.6	3.393
58	KAN700-1_4.tif:0002-0194-0760:c:2/4 - KAN700-1_4	0.451	2201.67	992.687	77058.5	3.892
59	KAN700-1_4.tif:0002-0039-0888:c:2/4 - KAN700-1_4	0.593	904.883	536.219	41624.6	5.227
60	KAN700-1_4.tif:0002-0038-1051:c:2/4 - KAN700-1_4	0.309	1362.02	421.1	32688.4	2.653
61	KAN700-1_4.tif:0002-0285-0892:c:2/4 - KAN700-1_4	0.49	1089.39	533.286	41397	4.308
62	KAN700-1_4.tif:0002-0487-1086:c:2/4 - KAN700-1_4	0.644	2274.51	1465.04	113725	5.585
63	KAN700-1_4.tif:0002-0363-1005:c:2/4 - KAN700-1_4	0.502	1102.54	553.923	42998.9	4.335
64	KAN700-1_4.tif:0002-1118-1022:c:2/4 - KAN700-1_4	0.348	1398.87	486.556	37769.5	3.063
						3.69352
65	KAN700-5_1.tif:0002-0458-0068:c:2/4 - KAN700-5_1	0.554	883.05	489.154	37971.2	4.802
66	KAN700-5_1.tif:0002-0471-0809:c:2/4 - KAN700-5_1	0.425	2457.73	1044.82	81105	3.718
67	KAN700-5_1.tif:0002-0218-0578:c:2/4 - KAN700-5_1	0.412	968.715	399.335	30998.9	3.52
68	KAN700-5_1.tif:0002-0870-0750:c:2/4 - KAN700-5_1	0.438	1200	525.594	40799.9	3.812
69	KAN700-5_1.tif:0002-0516-1106:c:2/4 - KAN700-5_1	0.335	718.254	240.571	18674.6	2.843
70	KAN700-5_1.tif:0002-1078-0853:c:2/4 - KAN700-5_1	0.348	856.465	297.896	23124.5	3.026
71	KAN700-5_1.tif:0002-0917-1231:c:2/4 - KAN700-5_1	0.335	1022.35	342.424	26581.1	2.921
72	KAN700-5_2.tif:0003-0097-0312:c:3/4 - KAN700-5_2	0.296	957.678	283.752	22026.6	2.6
73	KAN700-5_2.tif:0003-0119-0455:c:3/4 - KAN700-5_2	0.322	1076.35	346.644	26908.7	2.79
74	KAN700-5_2.tif:0002-0560-0623:c:2/4 - KAN700-5_2	0.605	1311.3	793.947	61631.1	5.258
75	KAN700-5_2.tif:0002-0868-0289:c:2/4 - KAN700-5_2	0.67	919.956	616.257	47837.7	5.828
76	KAN700-5_2.tif:0002-0962-0503:c:2/4 - KAN700-5_2	0.464	1708.48	792.328	61505.4	4.035
77	KAN700-5_2.tif:0002-0894-0782:c:2/4 - KAN700-5_2	0.309	1034.89	319.961	24837.3	2.613
78	KAN700-5_2.tif:0002-0071-0689:c:2/4 - KAN700-5_2	0.374	824.904	308.172	23922.2	3.212
79	KAN700-5_2.tif:0002-0553-1089:c:2/4 - KAN700-5_2	0.361	1052.23	379.542	29462.4	3.083
80	KAN700-5_3.tif:0002-0525-0179:c:2/4 - KAN700-5_3	0.374	1246.12	465.532	36137.4	3.262
81	KAN700-5_3.tif:0002-0865-0606:c:2/4 - KAN700-5_3	0.412	1160.08	478.222	37122.6	3.541
82	KAN700-5_3.tif:0002-1091-0793:c:2/4 - KAN700-5_3	0.219	1021.26	223.655	17361.5	1.824
83	KAN700-5_3.tif:0002-0177-0913:c:2/4 - KAN700-5_3	0.283	1660.68	470.651	36534.9	2.419
84	KAN700-5_3.tif:0002-0060-1247:c:2/4 - KAN700-5_3	0.283	1056.33	299.375	23239.3	2.45
85	KAN700-5_3.tif:0003-0678-1096:c:3/4 - KAN700-5_3	0.309	1074.81	332.302	25795.3	2.62
86	KAN700-5_4.tif:0002-0171-0566:c:2/4 - KAN700-5_4	0.412	2390.37	985.385	76491.7	3.548
87	KAN700-5_4.tif:0002-0741-0707:c:2/4 - KAN700-5_4	0.283	876.087	248.291	19273.9	2.395
88	KAN700-5_4.tif:0002-0551-0976:c:2/4 - KAN700-5_4	0.348	1638.76	569.995	44246.5	2.969
89	KAN700-5_4.tif:0002-0296-1125:c:2/4 - KAN700-5_4	0.206	1860.96	383.573	29775.3	1.797
90	KAN700-5_4.tif:0002-0810-0062:c:2/4 - KAN700-5_4	0.142	2398.97	339.945	26388.6	1.228
91	KAN700-5_5.tif:0002-0048-0545:c:2/4 - KAN700-5_5	0.232	2879.62	667.728	51833.2	1.953
92	KAN700-5_5.tif:0002-0195-0385:c:2/4 - KAN700-5_5	0.386	1605.5	620.474	48165	3.335
93	KAN700-5_5.tif:0002-0343-0383:c:2/4 - KAN700-5_5	0.438	866.84	379.673	29472.6	3.792
94	KAN700-5_5.tif:0002-0524-0080:c:2/4 - KAN700-5_5	0.206	2145.14	442.149	34322.3	1.757
95	KAN700-5_5.tif:0002-0804-0073:c:2/4 - KAN700-5_5	0.477	918.189	437.649	33973	4.135
96	KAN700-5_5.tif:0002-0875-0234:c:2/4 - KAN700-5_5	0.451	1179.04	531.606	41266.5	3.916
97	KAN700-5_5.tif:0002-0921-0578:c:2/4 - KAN700-5_5	0.438	1498.95	656.533	50964.2	3.759
98	KAN700-5_5.tif:0002-0040-0874:c:2/4 - KAN700-5_5	0.528	1220.91	644.849	50057.1	4.586
99	KAN700-5_5.tif:0002-0156-1135:c:2/4 - KAN700-5_5	0.296	1756.82	520.532	40406.9	2.589
100	KAN700-5_5.tif:0002-0578-0301:c:2/4 - KAN700-5_5	0.193	1442.52	278.744	21637.8	1.629
101	KAN700-5_6.tif:0002-0173-0339:c:2/4 - KAN700-5_6	0.271	746.15	201.854	15669.2	2.27
102	KAN700-5_6.tif:0003-0521-0483:c:3/4 - KAN700-5_6	0.296	1214.72	359.912	27938.6	2.573
103	KAN700-5_6.tif:0002-0825-0142:c:2/4 - KAN700-5_6	0.374	847.182	316.495	24568.3	3.195
104	KAN700-5_6.tif:0002-0826-0229:c:2/4 - KAN700-5_6	0.412	1102.72	454.575	35286.9	3.596
105	KAN700-5_6.tif:0002-1119-0427:c:2/4 - KAN700-5_6	0.464	795.783	369.053	28648.2	4.045
106	KAN700-5_6.tif:0002-1117-0871:c:2/4 - KAN700-5_6	0.155	1036.9	160.292	12442.8	1.258
107	KAN700-5_6.tif:0002-0934-1018:c:2/4 - KAN700-5_6	0.335	1143.23	382.912	29724	2.911
108	KAN700-5_6.tif:0002-0976-1219:c:2/4 - KAN700-5_6	0.206	2396.45	493.947	38343.2	1.792
109	KAN700-5_6.tif:0002-0368-0736:c:2/4 - KAN700-5_6	0.399	1153.07	460.478	35745.2	3.426
110	KAN700-5_6.tif:0002-0412-0775:c:2/4 - KAN700-5_6	0.58	1385.09	802.937	62328.9	5.094
111	KAN700-5_6.tif:0002-0407-1053:c:2/4 - KAN700-5_6	0.541	1003.33	542.855	42139.7	4.733
112	KAN700-5_7.tif:0002-0422-0556:c:2/4 - KAN700-5_7	0.515	971.929	500.826	38877.2	4.44
113	KAN700-5_7.tif:0002-0894-0704:c:2/4 - KAN700-5_7	0.283	1472.33	417.272	32391.2	2.456
114	KAN700-5_7.tif:0002-1159-0770:c:2/4 - KAN700-5_7	0.464	1438.22	666.991	51776	3.976
115	KAN700-5_7.tif:0002-0972-1105:c:2/4 - KAN700-5_7	0.142	1835.04	260.034	20185.4	1.232
116	KAN700-5_7.tif:0002-0290-1022:c:2/4 - KAN700-5_7	0.296	1518.02	449.777	34914.5	2.553
117	KAN700-5_8.tif:0002-0164-0374:c:2/4 - KAN700-5_8	0.49	831.964	407.267	31614.6	4.314
118	KAN700-5_8.tif:0002-0608-0407:c:2/4 - KAN700-5_8	0.541	851.435	460.673	35760.3	4.666
119	KAN700-5_8.tif:0002-0773-0062:c:2/4 - KAN700-5_8	0.696	888.31	617.945	47968.7	6.053
120	KAN700-5_8.tif:0002-0841-0426:c:2/4 - KAN700-5_8	0.477	1011.55	482.149	37427.4	4.144
121	KAN700-5_8.tif:0002-0899-0641:c:2/4 - KAN700-5_8	0.412	1914.64	789.275	61268.4	3.559
122	KAN700-5_8.tif:0002-1002-0625:c:2/4 - KAN700-5_8	0.502	1124.17	564.79	43842.5	4.374
123	KAN700-5_8.tif:0002-0312-0899:c:2/4 - KAN700-5_8	0.618	1185.15	732.836	56887.3	5.389
124	KAN700-5_8.tif:0002-0531-0995:c:2/4 - KAN700-5_8	0.438	882.1	386.357	29991.4	3.778
125	KAN700-5_8.tif:0002-0263-1195:c:2/4 - KAN700-5_8	0.438	1771.91	776.09	60244.9	3.863
						3.33352
						0.044454
129	KAN700-6_1.tif:0002-0095-0113:c:2/4 - KAN700-6_1	0.464	752.512	348.986	27090.4	4.102
130	KAN700-6_1.tif:0002-0483-0405:c:2/4 - KAN700-6_1	0.232	628.221	145.672	11308	1.989
131	KAN700-6_1.tif:0002-0596-0358:c:2/4 - KAN700-6_1	0.245	498.78	122.083	9476.81	2.161
132	KAN700-6_1.tif:0002-0378-0247:c:2/4 - KAN700-6_1	0.438	1275.57	558.695	43369.4	3.798
133	KAN700-6_1.tif:0002-0509-0089:c:2/4 - KAN700-6_1	0.309	1414.89	437.448	33957.4	2.688
134	KAN700-6_1.tif:0002-0735-0388:c:2/4 - KAN700-6_1	0.219	691.952	151.536	11763.2	1.867
135	KAN700-6_1.tif:0002-0863-0964:c:2/4 - KAN700-6_1	0.412	1963.23	809.308	62823.5	3.696
136	KAN700-6_1.tif:0002-1141-0796:c:2/4 - KAN700-6_1	0.219	1068.05	233.9	18156.8	1.907
137	KAN700-6_1.tif:0002-0999-1090:c:2/4 - KAN700-6_1	0.296	1160	343.698	26679.9	2.528
138	KAN700-6_1.tif:0002-1256-1184:c:2/4 - KAN700-6_1	0.567	881.182	499.471	38772	4.976
139	KAN700-6_1.tif:0002-0813-0749:c:2/4 - KAN700-6_1	0.322	841.216	270.919	21030.4	2.778
140	KAN700-6_1.tif:0002-0377-0840:c:2/4 - KAN700-6_1	0.502	767.604	385.65	29936.5	4.379
141	KAN700-6_2.tif:0002-0411-0215:c:2/4 - KAN700-6_2	0.361	1238.68	446.795	34683	3.158
142	KAN700-6_2.tif:0002-0971-0752:c:2/4 - KAN700-6_2	0.374	937.989	350.419	27201.7	3.278
143	KAN700-6_2.tif:0003-0575-0888:c:3/4 - KAN700-6_2	0.283	563.987	159.839	12407.7	2.455
144	KAN700-6_2.tif:0002-0288-0982:c:2/4 - KAN700-6_2	0.593	852.161	504.977	39199.4	5.202
145	KAN700-6_3.tif:0002-0096-0085:c:2/4 - KAN700-6_3	0.541	743.945	402.515	31245.7	4.723
146	KAN700-6_3.tif:0002-0186-0187:c:2/4 - KAN700-6_3	0.464	778.478	361.028	28025.2	4.091
147	KAN700-6_3.tif:0002-0061-0214:c:2/4 - KAN700-6_3	0.193	1015.88	196.302	15238.2	1.696
148	KAN700-6_3.tif:0002-0406-0204:c:2/4 - KAN700-6_3	0.528	955.128	504.472	39160.2	4.579
149	KAN700-6_3.tif:0002-0424-0343:c:2/4 - KAN700-6_3	0.593	1169.62	693.1	53802.7	5.222
150	KAN700-6_3.tif:0002-0610-0276:c:2/4 - KAN700-6_3	0.502	586.825	294.825	22886.2	4.396
151	KAN700-6_3.tif:0002-0588-0579:c:2/4 - KAN700-6_3	0.515	2049.47	1056.07	81978.8	4.547
152	KAN700-6_3.tif:0002-0839-0053:c:2/4 - KAN700-6_3	0.348	1467.59	510.457	39624.8	2.982
153	KAN700-6_3.tif:0002-1127-0179:c:2/4 - KAN700-6_3	0.361	638.081	230.158	17866.3	3.155
154	KAN700-6_3.tif:0002-0903-0378:c:2/4 - KAN700-6_3	0.258	832.494	214.488	16649.9	2.202
155	KAN700-6_3.tif:0002-0223-0558:c:2/4 - KAN700-6_3	0.451	631.905	284.912	22116.7	3.938
156	KAN700-6_3.tif:0002-0233-1236:c:2/4 - KAN700-6_3	0.438	1016.11	445.051	34547.6	3.846
157	KAN700-6_3.tif:0003-0340-1238:c:3/4 - KAN700-6_3	0.425	1448.74	615.879	47808.4	3.738
158	KAN700-6_3.tif:0002-0524-0807:c:2/4 - KAN700-6_3	0.129	1094.37	140.979	10943.6	1.047
159	KAN700-6_4.tif:0002-0852-0294:c:2/4 - KAN700-6_4	0.412	759.132	312.939	24292.2	3.554
160	KAN700-6_4.tif:0002-0621-0595:c:2/4 - KAN700-6_4	0.464	774.585	359.222	27885	4.015
161	KAN700-6_4.tif:0002-0790-0714:c:2/4 - KAN700-6_4	0.425	598.389	254.384	19746.8	3.7
162	KAN700-6_4.tif:0002-1001-0738:c:2/4 - KAN700-6_4	0.335	818.31	274.084	21276.1	2.932
163	KAN700-6_4.tif:0003-1225-0633:c:3/4 - KAN700-6_4	0.541	1057.95	572.408	44433.8	4.773
164	KAN700-6_4.tif:0002-0431-1046:c:2/4 - KAN700-6_4	0.618	1006.67	622.475	48320.4	5.394
165	KAN700-6_4.tif:0002-0202-1093:c:2/4 - KAN700-6_4	0.399	1143.97	456.846	35463.2	3.509
166	KAN700-6_4.tif:0002-0627-1174:c:2/4 - KAN700-6_4	0.425	959.821	408.034	31674.1	3.742
167	KAN700-6_5.tif:0002-0610-0729:c:2/4 - KAN700-6_5	0.67	902.734	604.721	46942.1	5.838
168	KAN700-6_5.tif:0002-0625-0689:c:2/4 - KAN700-6_5	0.322	1345.14	433.213	33628.6	2.794
169	KAN700-6_5.tif:0002-0920-0954:c:2/4 - KAN700-6_5	0.374	2096.25	783.129	60791.3	3.247
170	KAN700-6_5.tif:0002-0648-0938:c:2/4 - KAN700-6_5	0.283	934.326	264.797	20555.2	2.407
171	KAN700-6_5.tif:0002-0975-0824:c:2/4 - KAN700-6_5	0.309	673.769	208.312	16170.5	2.638
172	KAN700-6_5.tif:0002-1128-0811:c:2/4 - KAN700-6_5	0.425	887.438	377.263	29285.5	3.737
173	KAN700-6_5.tif:0002-0818-1100:c:2/4 - KAN700-6_5	0.374	679.893	253.998	19716.9	3.241
174	KAN700-6_5.tif:0002-0888-0408:c:2/4 - KAN700-6_5	0.232	871.313	202.041	15683.6	1.975
175	KAN700-6_6.tif:0002-0189-0659:c:2/4 - KAN700-6_6	0.386	1128.68	436.198	33860.4	3.338
176	KAN700-6_6.tif:0002-0374-0593:c:2/4 - KAN700-6_6	0.477	1620.18	772.247	59946.6	4.123
177	KAN700-6_6.tif:0002-0183-0998:c:2/4 - KAN700-6_6	0.451	1391.66	627.472	48708.3	3.913
178	KAN700-6_6.tif:0002-0054-1158:c:2/4 - KAN700-6_6	0.451	730.72	329.466	25575.2	3.947
179	KAN700-6_6.tif:0002-0470-1138:c:2/4 - KAN700-6_6	0.438	705.329	308.931	23981.2	3.823
180	KAN700-6_6.tif:0002-0610-0888:c:2/4 - KAN700-6_6	0.528	750.299	396.287	30762.3	4.568
181	KAN700-6_6.tif:0002-0651-1148:c:2/4 - KAN700-6_6	0.232	1075.45	249.377	19358.2	2.018
182	KAN700-6_6.tif:0002-0731-0733:c:2/4 - KAN700-6_6	0.49	515.556	252.378	19591.1	4.258
183	KAN700-6_6.tif:0002-0721-0616:c:2/4 - KAN700-6_6	0.361	793.795	286.324	22226.3	3.083
184	KAN700-6_6.tif:0002-1111-0592:c:2/4 - KAN700-6_6	0.361	1698.84	612.777	47567.6	3.136
185	KAN700-6_6.tif:0002-1056-0740:c:2/4 - KAN700-6_6	0.412	990.726	408.409	31703.2	3.584
186	KAN700-6_6.tif:0002-1107-0873:c:2/4 - KAN700-6_6	0.477	1036.27	493.931	38342	4.149
187	KAN700-6_6.tif:0002-1151-1028:c:2/4 - KAN700-6_6	0.451	449.607	202.718	15736.3	3.928
188	KAN700-6_6.tif:0002-1251-0548:c:2/4 - KAN700-6_6	0.348	649.342	225.855	17532.2	3.017
189	KAN700-6_6.tif:0002-0700-0294:c:2/4 - KAN700-6_6	0.593	674.461	399.675	31025.2	5.196
190	KAN700-6_6.tif:0002-0709-0117:c:2/4 - KAN700-6_6	0.348	1026.33	356.98	27711	3.073
191	KAN700-6_6.tif:0002-0890-0306:c:2/4 - KAN700-6_6	0.438	677.544	296.762	23036.5	3.764
						3.51648	3.696
						0.288309
1	KAN700-7_1.tif:0002-0199-0124:c:2/4 - KAN700-7_1	0.206	1206.28	248.634	19300.5	1.719
2	KAN700-7_1.tif:0002-0782-0203:c:2/4 - KAN700-7_1	0.245	1567.33	383.625	29779.3	2.101
3	KAN700-7_1.tif:0002-1113-0367:c:2/4 - KAN700-7_1	0.348	533.857	185.687	14414.1	3.012
4	KAN700-7_1.tif:0002-0906-0491:c:2/4 - KAN700-7_1	0.386	700.687	270.793	21020.6	3.401
5	KAN700-7_1.tif:0002-0955-0769:c:2/4 - KAN700-7_1	0.541	1872.84	1013.31	78659.3	4.751
6	KAN700-7_1.tif:0003-1137-0962:c:3/4 - KAN700-7_1	0.348	485.262	168.784	13102.1	2.993
7	KAN700-7_1.tif:0002-0987-1128:c:2/4 - KAN700-7_1	0.683	909.573	621.019	48207.4	5.905
8	KAN700-7_1.tif:0002-0803-1253:c:2/4 - KAN700-7_1	0.528	683.599	361.058	28027.5	4.57
9	KAN700-7_1.tif:0002-0565-0498:c:2/4 - KAN700-7_1	0.412	778.816	321.053	24922.1	3.536
10	KAN700-7_1.tif:0002-0379-0727:c:2/4 - KAN700-7_1	0.361	708.83	255.677	19847.2	3.133
11	KAN700-7_1.tif:0002-0113-0995:c:2/4 - KAN700-7_1	0.361	868.009	313.093	24304.2	3.129
12	KAN700-7_1.tif:0002-0301-1108:c:2/4 - KAN700-7_1	0.412	988.735	407.588	31639.5	3.646
13	KAN700-7_1.tif:0002-0261-1271:c:2/4 - KAN700-7_1	0.49	791.38	387.401	30072.5	4.204
14	KAN700-7_1.tif:0002-0190-0343:c:2/4 - KAN700-7_1	0.232	529.752	122.839	9535.54	2.011
15	KAN700-7_1.tif:0002-0578-1186:c:2/4 - KAN700-7_1	0.335	568.464	190.401	14780.1	2.943
16	KAN700-7_2.tif:0002-0185-0122:c:2/4 - KAN700-7_2	0.541	2075.92	1123.19	87188.7	4.725
17	KAN700-7_2.tif:0002-0421-0163:c:2/4 - KAN700-7_2	0.644	518.982	334.283	25949.1	5.626
18	KAN700-7_2.tif:0002-0790-0112:c:2/4 - KAN700-7_2	0.477	1075.88	512.813	39807.7	4.16
19	KAN700-7_2.tif:0003-0837-0185:c:3/4 - KAN700-7_2	0.502	872.256	438.228	34018	4.349
20	KAN700-7_2.tif:0002-0532-0714:c:2/4 - KAN700-7_2	0.412	1505.73	620.71	48183.4	3.581
21	KAN700-7_2.tif:0002-0646-0825:c:2/4 - KAN700-7_2	0.438	521.949	228.612	17746.3	3.756
22	KAN700-7_2.tif:0002-0662-0989:c:2/4 - KAN700-7_2	0.464	1029.13	477.272	37048.8	4.051
23	KAN700-7_2.tif:0002-0785-0515:c:2/4 - KAN700-7_2	0.438	911.206	399.105	30981	3.825
24	KAN700-7_2.tif:0002-0018-0401:c:2/4 - KAN700-7_2	0.412	1212.79	499.953	38809.4	3.528
25	KAN700-7_2.tif:0002-0147-0730:c:2/4 - KAN700-7_2	0.734	348.173	255.66	19845.9	6.388
26	KAN700-7_2.tif:0002-0573-1245:c:2/4 - KAN700-7_2	0.193	953.109	184.173	14296.6	1.613
27	KAN700-7_3.tif:0002-0539-0232:c:2/4 - KAN700-7_3	0.361	1345.97	485.497	37687.2	3.15
28	KAN700-7_3.tif:0002-0802-0083:c:2/4 - KAN700-7_3	0.67	584.238	391.368	30380.4	5.877
29	KAN700-7_3.tif:0002-0946-0212:c:2/4 - KAN700-7_3	0.593	804.155	476.529	36991.1	5.186
30	KAN700-7_3.tif:0002-1168-0659:c:2/4 - KAN700-7_3	0.593	1132.65	671.188	52101.8	5.129
31	KAN700-7_3.tif:0002-0894-0955:c:2/4 - KAN700-7_3	0.605	929.371	562.702	43680.4	5.35
32	KAN700-7_3.tif:0002-0973-1055:c:2/4 - KAN700-7_3	0.992	1174.08	1164.61	90404.2	8.659
33	KAN700-7_3.tif:0002-1260-0944:c:2/4 - KAN700-7_3	0.567	1146.88	650.071	50462.6	4.929
34	KAN700-7_3.tif:0002-0425-0584:c:2/4 - KAN700-7_3	0.593	1593.46	944.259	73299.2	5.205
35	KAN700-7_3.tif:0003-0692-1087:c:3/4 - KAN700-7_3	0.361	709.805	256.029	19874.5	3.169
36	KAN700-7_3.tif:0002-0640-0928:c:2/4 - KAN700-7_3	0.631	649.309	409.863	31816.1	5.479
37	KAN700-7_4.tif:0002-0281-0169:c:2/4 - KAN700-7_4	0.374	1543	576.442	44747	3.239
38	KAN700-7_4.tif:0002-0329-0287:c:2/4 - KAN700-7_4	0.412	693.766	285.993	22200.5	3.56
39	KAN700-7_4.tif:0002-0485-0401:c:2/4 - KAN700-7_4	0.49	1277.67	625.452	48551.5	4.221
40	KAN700-7_4.tif:0002-0760-0290:c:2/4 - KAN700-7_4	0.451	688.713	310.526	24105	3.895
41	KAN700-7_4.tif:0002-0844-0461:c:2/4 - KAN700-7_4	0.451	1169.05	527.098	40916.6	3.968
42	KAN700-7_4.tif:0002-0961-0607:c:2/4 - KAN700-7_4	0.721	887.307	640.109	49689.2	6.282
43	KAN700-7_4.tif:0002-0103-0615:c:2/4 - KAN700-7_4	0.348	1028.31	357.668	27764.4	3.027
44	KAN700-7_4.tif:0002-0344-0745:c:2/4 - KAN700-7_4	0.425	1127.78	479.434	37216.7	3.682
45	KAN700-7_4.tif:0002-0360-0948:c:2/4 - KAN700-7_4	0.399	1031.31	411.852	31970.5	3.486
46	KAN700-7_4.tif:0002-0592-0841:c:2/4 - KAN700-7_4	0.605	787.863	477.024	37029.6	5.329
47	KAN700-7_4.tif:0002-0796-0855:c:2/4 - KAN700-7_4	0.348	2383.61	829.068	64357.4	3.06
48	KAN700-7_4.tif:0003-0773-0956:c:3/4 - KAN700-7_4	0.451	807.133	363.919	28249.6	3.965
49	KAN700-7_4.tif:0003-1010-1077:c:3/4 - KAN700-7_4	0.374	941.205	351.62	27294.9	3.249
50	KAN700-7_4.tif:0003-1208-0944:c:3/4 - KAN700-7_4	0.515	899.101	463.298	35964	4.526
51	KAN700-7_4.tif:0002-0104-1139:c:2/4 - KAN700-7_4	0.824	1295.04	1067.71	82882.2	7.207
52	KAN700-7_4.tif:0002-0567-1212:c:2/4 - KAN700-7_4	0.85	692.77	589.013	45722.8	7.396
53	KAN700-7_4.tif:0002-0546-0987:c:2/4 - KAN700-7_4	0.193	1199.67	231.817	17995.1	1.698
54	KAN700-7_4.tif:0002-0754-1196:c:2/4 - KAN700-7_4	0.271	1044.82	282.652	21941.2	2.35
55	KAN700-7_4.tif:0002-0897-0479:c:2/4 - KAN700-7_4	0.374	761.967	284.66	22097	3.288
56	KAN700-7_4.tif:0002-1209-0850:c:2/4 - KAN700-7_4	0.464	650.695	301.767	23425	4.072
						4.03487
						0.0512828
1	KAN700-8_1.tif:0002-0422-0022:c:2/4 - KAN700-8_1	0.283	582.205	165.002	12808.5	2.439
2	KAN700-8_1.tif:0002-0261-0186:c:2/4 - KAN700-8_1	0.245	797.473	195.192	15152	2.049
3	KAN700-8_1.tif:0002-0248-0427:c:2/4 - KAN700-8_1	0.386	619.375	239.368	18581.2	3.315
4	KAN700-8_1.tif:0002-0698-0602:c:2/4 - KAN700-8_1	0.206	651.869	134.361	10429.9	1.777
5	KAN700-8_1.tif:0002-0832-0290:c:2/4 - KAN700-8_1	0.296	900.152	266.708	20703.5	2.557
6	KAN700-8_1.tif:0002-1134-0050:c:2/4 - KAN700-8_1	0.309	541.131	167.304	12987.2	2.684
7	KAN700-8_1.tif:0002-1093-0105:c:2/4 - KAN700-8_1	0.464	1072.22	497.254	38599.9	4.062
8	KAN700-8_1.tif:0002-1256-0433:c:2/4 - KAN700-8_1	0.245	809.956	198.247	15389.2	2.051
9	KAN700-8_1.tif:0002-0614-1218:c:2/4 - KAN700-8_1	0.219	783.664	171.621	13322.3	1.839
10	KAN700-8_2.tif:0002-0114-0228:c:2/4 - KAN700-8_2	0.18	753.829	135.954	10553.6	1.544
11	KAN700-8_2.tif:0002-0542-0037:c:2/4 - KAN700-8_2	0.167	542.619	90.872	7054.05	1.425
12	KAN700-8_2.tif:0002-0601-0118:c:2/4 - KAN700-8_2	0.258	738.115	190.172	14762.3	2.188
13	KAN700-8_2.tif:0002-0655-0466:c:2/4 - KAN700-8_2	0.283	1317.75	373.463	28990.5	2.465
14	KAN700-8_2.tif:0002-0903-0455:c:2/4 - KAN700-8_2	0.438	630.012	275.943	21420.4	3.776
15	KAN700-8_2.tif:0002-0541-0837:c:2/4 - KAN700-8_2	0.464	1662.92	771.198	59865.2	4.062
16	KAN700-8_2.tif:0002-0735-1147:c:2/4 - KAN700-8_2	0.49	1047.28	512.671	39796.7	4.294
17	KAN700-8_2.tif:0002-0915-1210:c:2/4 - KAN700-8_2	0.155	881.197	136.222	10574.4	1.253
18	KAN700-8_3.tif:0002-0756-0162:c:2/4 - KAN700-8_3	0.386	544.575	210.461	16337.2	3.361
19	KAN700-8_3.tif:0002-1000-0358:c:2/4 - KAN700-8_3	0.219	416.503	91.213	7080.54	1.864
20	KAN700-8_3.tif:0002-0895-0980:c:2/4 - KAN700-8_3	0.399	1437.44	574.041	44560.6	3.474
21	KAN700-8_3.tif:0002-0533-1189:c:2/4 - KAN700-8_3	0.283	553.168	156.773	12169.7	2.426
22	KAN700-8_3.tif:0002-0748-1216:c:2/4 - KAN700-8_3	0.245	1010.99	247.453	19208.9	2.168
23	KAN700-8_4.tif:0002-0511-0122:c:2/4 - KAN700-8_4	0.528	692.38	365.696	28387.6	4.659
24	KAN700-8_4.tif:0002-0459-0343:c:2/4 - KAN700-8_4	0.361	731.99	264.031	20495.7	3.112
25	KAN700-8_4.tif:0002-0276-0396:c:2/4 - KAN700-8_4	0.155	841.538	130.091	10098.5	1.26
26	KAN700-8_4.tif:0002-0068-0710:c:2/4 - KAN700-8_4	0.502	739.769	371.666	28851	4.32
27	KAN700-8_4.tif:0002-0482-0667:c:2/4 - KAN700-8_4	0.348	714.46	248.504	19290.4	3.02
28	KAN700-8_4.tif:0002-0636-0705:c:2/4 - KAN700-8_4	0.541	1197.81	648.081	50308.1	4.738
29	KAN700-8_4.tif:0002-0869-0848:c:2/4 - KAN700-8_4	0.451	1134.72	511.619	39715.1	3.878
30	KAN700-8_4.tif:0002-0781-0917:c:2/4 - KAN700-8_4	0.361	662.663	239.025	18554.6	3.15
31	KAN700-8_4.tif:0002-1033-0672:c:2/4 - KAN700-8_4	0.399	870.624	347.684	26989.3	3.478
32	KAN700-8_4.tif:0002-0829-0551:c:2/4 - KAN700-8_4	0.374	560.169	209.271	16244.9	3.193
33	KAN700-8_4.tif:0002-0721-0505:c:2/4 - KAN700-8_4	0.129	657.053	84.643	6570.53	1.038
34	KAN700-8_4.tif:0002-0084-0222:c:2/4 - KAN700-8_4	0.335	608.024	203.651	15808.6	2.838
35	KAN700-8_5.tif:0002-0191-0173:c:2/4 - KAN700-8_5	0.322	850.279	273.838	21257	2.803
36	KAN700-8_5.tif:0002-0067-0603:c:2/4 - KAN700-8_5	0.49	501.855	245.671	19070.5	4.247
37	KAN700-8_5.tif:0002-0149-0715:c:2/4 - KAN700-8_5	0.296	642.528	190.376	14778.1	2.524
38	KAN700-8_5.tif:0002-0226-0683:c:2/4 - KAN700-8_5	0.49	798.894	391.079	30358	4.281
39	KAN700-8_5.tif:0002-0085-1063:c:2/4 - KAN700-8_5	0.361	1213.56	437.734	33979.6	3.124
40	KAN700-8_5.tif:0002-0501-0844:c:2/4 - KAN700-8_5	0.18	456.328	82.299	6388.59	1.514
41	KAN700-8_5.tif:0002-0980-0441:c:2/4 - KAN700-8_5	0.361	622.466	224.525	17429	3.106
42	KAN700-8_5.tif:0002-0975-0659:c:2/4 - KAN700-8_5	0.412	641.284	264.358	20521.1	3.564
43	KAN700-8_5.tif:0002-0889-0815:c:2/4 - KAN700-8_5	0.438	831.477	364.184	28270.2	3.799
44	KAN700-8_5.tif:0002-1001-0927:c:2/4 - KAN700-8_5	0.361	897.993	323.909	25143.8	3.152
45	KAN700-8_5.tif:0002-1004-1091:c:2/4 - KAN700-8_5	0.451	1062.64	479.12	37192.3	3.916
46	KAN700-8_6.tif:0002-0531-0501:c:2/4 - KAN700-8_6	0.258	842.253	217.002	16845.1	2.168
47	KAN700-8_6.tif:0002-0514-0285:c:2/4 - KAN700-8_6	0.335	758.003	253.885	19708.1	2.894
48	KAN700-8_6.tif:0002-0695-0049:c:2/4 - KAN700-8_6	0.477	630.49	300.519	23328.1	4.162
49	KAN700-8_6.tif:0002-0882-0736:c:2/4 - KAN700-8_6	0.477	1242.83	592.388	45984.8	4.121
50	KAN700-8_6.tif:0002-0879-0505:c:2/4 - KAN700-8_6	0.425	517.981	220.201	17093.4	3.654
51	KAN700-8_6.tif:0002-1072-0302:c:2/4 - KAN700-8_6	0.335	489.895	164.085	12737.3	2.88
52	KAN700-8_6.tif:0003-0027-0674:c:3/4 - KAN700-8_6	0.232	654.683	151.808	11784.3	2.03
53	KAN700-8_6.tif:0002-0181-0765:c:2/4 - KAN700-8_6	0.219	556.76	121.929	9464.91	1.928
54	KAN700-8_7.tif:0002-0820-0160:c:2/4 - KAN700-8_7	0.167	776.402	130.024	10093.2	1.445
55	KAN700-8_7.tif:0002-0138-0506:c:2/4 - KAN700-8_7	0.129	1233.86	158.949	12338.6	1.041
56	KAN700-8_7.tif:0002-0393-0688:c:2/4 - KAN700-8_7	0.232	889.988	206.371	16019.8	1.945
57	KAN700-8_7.tif:0002-0234-1077:c:2/4 - KAN700-8_7	0.374	698.858	261.083	20266.9	3.261
58	KAN700-8_7.tif:0002-0380-1023:c:2/4 - KAN700-8_7	0.309	872.285	269.688	20934.8	2.617
59	KAN700-8_7.tif:0002-0731-1081:c:2/4 - KAN700-8_7	0.412	1477.63	609.127	47284.2	3.558
60	KAN700-8_8.tif:0002-0868-0260:c:2/4 - KAN700-8_8	0.477	1052.42	501.631	38939.7	4.116
61	KAN700-8_8.tif:0002-0342-0500:c:2/4 - KAN700-8_8	0.412	476.962	196.619	15262.8	3.562
62	KAN700-8_8.tif:0002-0135-1190:c:2/4 - KAN700-8_8	0.335	705.113	236.169	18332.9	2.909
63	KAN700-8_8.tif:0002-0414-1114:c:2/4 - KAN700-8_8	0.399	1808.04	722.04	56049.2	3.47
64	KAN700-8_8.tif:0002-0320-0932:c:2/4 - KAN700-8_8	0.271	700.773	189.578	14716.2	2.337
65	KAN700-8_8.tif:0002-0959-1058:c:2/4 - KAN700-8_8	0.322	1258.87	405.427	31471.7	2.767
66	KAN700-8_8.tif:0002-1180-0864:c:2/4 - KAN700-8_8	0.554	583.753	323.362	25101.4	4.796
67	KAN700-8_8.tif:0002-0794-0695:c:2/4 - KAN700-8_8	0.155	845.041	130.632	10140.5	1.294
						2.9066
						3.49053e-06
1	KAN700-10_1.tif:0002-0433-0112:c:2/4 - KAN700-10_1	0.49	1111.1	543.912	42221.8	4.225
2	KAN700-10_1.tif:0002-0339-0292:c:2/4 - KAN700-10_1	0.567	590.633	334.782	25987.9	4.976
3	KAN700-10_1.tif:0002-0765-0252:c:2/4 - KAN700-10_1	0.309	2155.87	666.539	51740.9	2.691
4	KAN700-10_1.tif:0002-0888-0458:c:2/4 - KAN700-10_1	0.374	1234.99	461.375	35814.7	3.22
5	KAN700-10_1.tif:0002-0454-0522:c:2/4 - KAN700-10_1	0.155	1186.24	183.378	14234.9	1.31
6	KAN700-10_1.tif:0002-0354-0470:c:2/4 - KAN700-10_1	0.374	742.45	277.369	21531.1	3.233
7	KAN700-10_1.tif:0002-0293-0671:c:2/4 - KAN700-10_1	0.322	594.394	191.428	14859.9	2.795
8	KAN700-10_1.tif:0002-0643-0627:c:2/4 - KAN700-10_1	0.335	2650.7	887.822	68918.3	2.892
9	KAN700-10_1.tif:0002-0430-0842:c:2/4 - KAN700-10_1	0.258	1814.26	467.436	36285.3	2.256
10	KAN700-10_1.tif:0002-0381-0945:c:2/4 - KAN700-10_1	0.399	2302.69	919.577	71383.3	3.415
11	KAN700-10_1.tif:0002-0513-1072:c:2/4 - KAN700-10_1	0.605	880.642	533.199	41390.2	5.33
12	KAN700-10_1.tif:0002-0464-1179:c:2/4 - KAN700-10_1	0.361	1195.83	431.338	33483.1	3.073
13	KAN700-10_1.tif:0002-0607-1236:c:2/4 - KAN700-10_1	0.399	1575.07	629.003	48827.1	3.506
14	KAN700-10_2.tif:0002-0387-0036:c:2/4 - KAN700-10_2	0.477	694.037	330.808	25679.4	4.177
15	KAN700-10_2.tif:0002-0318-0302:c:2/4 - KAN700-10_2	0.155	1292.48	199.801	15509.8	1.359
16	KAN700-10_2.tif:0002-0082-0411:c:2/4 - KAN700-10_2	0.322	767.712	247.247	19192.8	2.743
17	KAN700-10_2.tif:0002-0254-0501:c:2/4 - KAN700-10_2	0.219	1856.24	406.513	31556	1.88
18	KAN700-10_2.tif:0002-0719-0217:c:2/4 - KAN700-10_2	0.258	1276.66	328.926	25533.3	2.253
19	KAN700-10_2.tif:0002-0892-0580:c:2/4 - KAN700-10_2	0.245	1857.96	454.759	35301.2	2.107
20	KAN700-10_2.tif:0002-0930-0700:c:2/4 - KAN700-10_2	0.322	1025.19	330.169	25629.8	2.809
21	KAN700-10_2.tif:0002-0652-0794:c:2/4 - KAN700-10_2	0.374	1210.38	452.18	35101	3.258
22	KAN700-10_2.tif:0002-0327-0779:c:2/4 - KAN700-10_2	0.167	2238.74	374.921	29103.7	1.576
23	KAN700-10_2.tif:0002-0191-0670:c:2/4 - KAN700-10_2	0.348	971.468	337.897	26229.6	2.993
24	KAN700-10_2.tif:0002-0207-0814:c:2/4 - KAN700-10_2	0.438	1416.56	620.449	48163.1	3.813
25	KAN700-10_2.tif:0002-0166-0990:c:2/4 - KAN700-10_2	0.399	1136.07	453.69	35218.2	3.51
26	KAN700-10_2.tif:0002-0425-0819:c:2/4 - KAN700-10_2	0.142	2737.78	387.956	30115.6	1.175
27	KAN700-10_2.tif:0002-0507-0912:c:2/4 - KAN700-10_2	0.18	1845.46	332.831	25836.4	1.493
28	KAN700-10_2.tif:0002-0564-1072:c:2/4 - KAN700-10_2	0.348	1217.1	423.334	32861.8	2.962
29	KAN700-10_2.tif:0002-0889-0896:c:2/4 - KAN700-10_2	0.541	548.754	296.906	23047.7	4.747
30	KAN700-10_2.tif:0002-0966-1087:c:2/4 - KAN700-10_2	0.283	1875.97	531.668	41271.4	2.473
31	KAN700-10_2.tif:0002-0894-1262:c:2/4 - KAN700-10_2	0.361	1473.2	531.388	41249.6	3.133
32	KAN700-10_2.tif:0002-1129-0160:c:2/4 - KAN700-10_2	0.696	798.765	555.654	43133.3	6.127
33	KAN700-10_3.tif:0002-0033-0172:c:2/4 - KAN700-10_3	0.399	1069.25	427.006	33146.8	3.508
34	KAN700-10_3.tif:0002-0186-0308:c:2/4 - KAN700-10_3	0.361	1520.69	548.518	42579.4	3.126
35	KAN700-10_3.tif:0002-0274-0510:c:2/4 - KAN700-10_3	0.593	931.823	552.183	42863.9	5.121
36	KAN700-10_3.tif:0002-0313-0645:c:2/4 - KAN700-10_3	0.219	1526.66	334.335	25953.2	1.855
37	KAN700-10_3.tif:0002-0378-0722:c:2/4 - KAN700-10_3	0.348	2296.67	798.829	62010	3.019
38	KAN700-10_3.tif:0002-0421-0793:c:2/4 - KAN700-10_3	0.167	2427.09	406.463	31552.1	1.447
39	KAN700-10_3.tif:0002-0494-0556:c:2/4 - KAN700-10_3	0.399	1225.76	489.505	37998.4	3.466
40	KAN700-10_3.tif:0002-0481-0794:c:2/4 - KAN700-10_3	0.386	2940.27	1136.32	88208.1	3.4
41	KAN700-10_3.tif:0002-0259-0885:c:2/4 - KAN700-10_3	0.309	1267.35	391.83	30416.3	2.646
42	KAN700-10_3.tif:0002-0199-1070:c:2/4 - KAN700-10_3	0.386	2764.28	1068.31	82928.4	3.411
43	KAN700-10_3.tif:0002-0680-1144:c:2/4 - KAN700-10_3	0.477	1144.52	545.529	42347.3	4.119
44	KAN700-10_3.tif:0002-0764-1131:c:2/4 - KAN700-10_3	0.322	1524.32	490.916	38107.9	2.806
45	KAN700-10_3.tif:0002-0771-1000:c:2/4 - KAN700-10_3	0.451	849.252	382.91	29723.8	3.927
46	KAN700-10_3.tif:0002-0875-0939:c:2/4 - KAN700-10_3	0.309	679.458	210.071	16307	2.649
47	KAN700-10_3.tif:0002-1001-0832:c:2/4 - KAN700-10_3	0.322	1114.16	358.823	27854	2.814
48	KAN700-10_3.tif:0002-0955-0701:c:2/4 - KAN700-10_3	0.348	685.748	238.518	18515.2	2.984
49	KAN700-10_4.tif:0002-0138-0218:c:2/4 - KAN700-10_4	0.554	1128.25	624.979	48514.7	4.867
50	KAN700-10_4.tif:0002-0273-0167:c:2/4 - KAN700-10_4	0.399	1153.77	460.759	35767	3.443
51	KAN700-10_4.tif:0002-0112-0375:c:2/4 - KAN700-10_4	0.399	1999.19	798.376	61974.9	3.483
52	KAN700-10_4.tif:0002-0428-0302:c:2/4 - KAN700-10_4	0.348	1080.52	375.827	29174	2.973
53	KAN700-10_4.tif:0002-0517-0506:c:2/4 - KAN700-10_4	0.528	694.203	366.659	28462.3	4.596
54	KAN700-10_4.tif:0002-0555-0640:c:2/4 - KAN700-10_4	0.232	1550.57	359.547	27910.2	1.93
55	KAN700-10_4.tif:0002-0735-0550:c:2/4 - KAN700-10_4	0.425	1029.59	437.695	33976.6	3.648
56	KAN700-10_4.tif:0002-1012-0314:c:2/4 - KAN700-10_4	0.386	856.1	330.855	25683	3.354
57	KAN700-10_4.tif:0002-0720-0071:c:2/4 - KAN700-10_4	0.541	498.477	269.703	20936	4.713
58	KAN700-10_4.tif:0002-0620-0718:c:2/4 - KAN700-10_4	0.348	2214.44	770.227	59789.8	3.015
59	KAN700-10_4.tif:0002-0662-0789:c:2/4 - KAN700-10_4	0.206	2102.88	433.436	33646	1.759
60	KAN700-10_4.tif:0002-0721-0788:c:2/4 - KAN700-10_4	0.386	2463.17	951.935	73895.1	3.424
61	KAN700-10_4.tif:0002-0077-0704:c:2/4 - KAN700-10_4	0.322	1189.16	382.976	29728.9	2.752
62	KAN700-10_4.tif:0002-0500-0877:c:2/4 - KAN700-10_4	0.245	1024.46	250.751	19464.8	2.078
63	KAN700-10_4.tif:0002-0441-1066:c:2/4 - KAN700-10_4	0.399	2723.45	1087.61	84426.9	3.417
64	KAN700-10_4.tif:0002-0119-1105:c:2/4 - KAN700-10_4	0.438	1628.11	713.107	55355.8	3.863
65	KAN700-10_4.tif:0002-0207-0936:c:2/4 - KAN700-10_4	0.477	743.38	354.327	27505	4.11
66	KAN700-10_4.tif:0002-0921-1139:c:2/4 - KAN700-10_4	0.451	1190.93	536.967	41682.7	3.924
67	KAN700-10_4.tif:0002-1005-1126:c:2/4 - KAN700-10_4	0.361	1340.09	483.376	37522.6	3.088
68	KAN700-10_4.tif:0002-1012-0996:c:2/4 - KAN700-10_4	0.464	812.447	376.781	29248.1	4.09
						3.1814
						0.0022822
1	KAN700-11_1.tif:0002-0650-0127:c:2/4 - KAN700-11_1	0.477	768.726	366.408	28442.9	4.131
2	KAN700-11_1.tif:0002-0789-0134:c:2/4 - KAN700-11_1	0.451	1186.63	535.027	41532.1	3.949
3	KAN700-11_1.tif:0002-0245-0458:c:2/4 - KAN700-11_1	0.451	1138.12	513.156	39834.3	3.974
4	KAN700-11_1.tif:0002-0035-0571:c:2/4 - KAN700-11_1	0.374	763.038	285.06	22128.1	3.28
5	KAN700-11_1.tif:0002-0063-0681:c:2/4 - KAN700-11_1	0.464	1034.63	479.82	37246.6	3.994
6	KAN700-11_1.tif:0002-0570-0540:c:2/4 - KAN700-11_1	0.374	876.685	327.517	25423.9	3.243
7	KAN700-11_1.tif:0002-0438-0710:c:2/4 - KAN700-11_1	0.283	2950.3	836.143	64906.6	2.408
8	KAN700-11_1.tif:0002-0248-0689:c:2/4 - KAN700-11_1	0.374	1033.62	386.143	29974.8	3.251
9	KAN700-11_1.tif:0002-0485-1042:c:2/4 - KAN700-11_1	0.464	2221.54	1030.26	79975.3	3.981
10	KAN700-11_1.tif:0002-0153-1190:c:2/4 - KAN700-11_1	0.386	1458.05	563.487	43741.4	3.372
11	KAN700-11_1.tif:0002-0942-0903:c:2/4 - KAN700-11_1	0.515	1389.32	715.903	55572.8	4.507
12	KAN700-11_1.tif:0002-0838-1059:c:2/4 - KAN700-11_1	0.386	2113.18	816.675	63395.4	3.409
13	KAN700-11_1.tif:0002-1229-0786:c:2/4 - KAN700-11_1	0.567	1144.61	648.786	50362.8	4.886
14	KAN700-11_1.tif:0002-1224-1103:c:2/4 - KAN700-11_1	0.451	1094.96	493.693	38323.5	3.926
15	KAN700-11_1.tif:0002-0739-0807:c:2/4 - KAN700-11_1	0.309	857.891	265.238	20589.4	2.622
16	KAN700-11_1.tif:0002-1046-1247:c:2/4 - KAN700-11_1	0.438	809.297	354.469	27516.1	3.803
17	KAN700-11_2.tif:0002-0326-0448:c:2/4 - KAN700-11_2	0.361	1640.23	591.637	45926.5	3.106
18	KAN700-11_2.tif:0002-0317-1003:c:2/4 - KAN700-11_2	0.554	2058.48	1140.27	88514.6	4.867
19	KAN700-11_2.tif:0002-0626-0824:c:2/4 - KAN700-11_2	0.515	1521.01	783.762	60840.5	4.524
20	KAN700-11_2.tif:0002-0840-0953:c:2/4 - KAN700-11_2	0.412	1600.49	659.774	51215.7	3.692
21	KAN700-11_2.tif:0002-1075-0703:c:2/4 - KAN700-11_2	0.644	1061.99	684.041	53099.5	5.716
22	KAN700-11_2.tif:0002-0429-1233:c:2/4 - KAN700-11_2	0.605	1777.58	1076.27	83546.4	5.244
23	KAN700-11_2.tif:0002-0591-1247:c:2/4 - KAN700-11_2	0.554	1317.36	729.733	56646.4	4.847
24	KAN700-11_2.tif:0002-0744-1234:c:2/4 - KAN700-11_2	0.335	1639.67	549.189	42631.4	2.844
25	KAN700-11_2.tif:0002-0858-1123:c:2/4 - KAN700-11_2	0.515	1797.74	926.36	71909.8	4.52
26	KAN700-11_2.tif:0002-1124-1158:c:2/4 - KAN700-11_2	0.502	808.431	406.162	31528.8	4.422
27	KAN700-11_3.tif:0002-0346-0397:c:2/4 - KAN700-11_3	0.683	980.94	669.746	51989.8	5.935
28	KAN700-11_3.tif:0002-0747-0332:c:2/4 - KAN700-11_3	0.438	1194.77	523.306	40622.3	3.852
29	KAN700-11_3.tif:0002-0689-0395:c:2/4 - KAN700-11_3	0.567	908.167	514.766	39959.3	4.912
30	KAN700-11_3.tif:0002-0589-0486:c:2/4 - KAN700-11_3	0.412	1253.69	516.812	40118.2	3.647
31	KAN700-11_3.tif:0002-0858-0612:c:2/4 - KAN700-11_3	0.515	961.915	495.665	38476.6	4.461
32	KAN700-11_3.tif:0002-0803-0761:c:2/4 - KAN700-11_3	0.425	1404.49	597.07	46348.3	3.683
33	KAN700-11_3.tif:0002-0153-0670:c:2/4 - KAN700-11_3	0.425	1134.99	482.502	37454.8	3.731
34	KAN700-11_3.tif:0002-0368-1150:c:2/4 - KAN700-11_3	0.49	1227.64	600.961	46650.3	4.229
35	KAN700-11_3.tif:0002-0563-1235:c:2/4 - KAN700-11_3	0.399	1578.67	630.442	48938.8	3.471
36	KAN700-11_3.tif:0002-0742-1015:c:2/4 - KAN700-11_3	0.438	1783.8	781.296	60649	3.817
37	KAN700-11_3.tif:0002-1208-0360:c:2/4 - KAN700-11_3	0.502	988.197	496.478	38539.7	4.37
38	KAN700-11_3.tif:0002-1244-0563:c:2/4 - KAN700-11_3	0.283	1028.43	291.468	22625.6	2.386
39	KAN700-11_3.tif:0002-0831-0922:c:2/4 - KAN700-11_3	0.438	763.577	334.444	25961.6	3.828
40	KAN700-11_3.tif:0002-1159-1076:c:2/4 - KAN700-11_3	0.477	1056.44	503.546	39088.4	4.19
41	KAN700-11_4.tif:0002-0112-0065:c:2/4 - KAN700-11_4	0.425	763.961	324.771	25210.7	3.734
42	KAN700-11_4.tif:0002-0062-0335:c:2/4 - KAN700-11_4	0.322	777.609	250.434	19440.2	2.843
43	KAN700-11_4.tif:0002-0078-0567:c:2/4 - KAN700-11_4	0.502	1147.68	576.604	44759.5	4.398
44	KAN700-11_4.tif:0002-0293-0684:c:2/4 - KAN700-11_4	0.696	1465.91	1019.75	79159.1	6.058
45	KAN700-11_4.tif:0002-0374-0889:c:2/4 - KAN700-11_4	0.412	1862.07	767.607	59586.4	3.59
46	KAN700-11_4.tif:0002-0435-1032:c:2/4 - KAN700-11_4	0.232	1020.36	236.602	18366.5	1.974
47	KAN700-11_4.tif:0002-0088-1099:c:2/4 - KAN700-11_4	0.386	2874.22	1110.79	86226.5	3.315
48	KAN700-11_4.tif:0002-0744-0486:c:2/4 - KAN700-11_4	0.361	1363.12	491.681	38167.3	3.082
49	KAN700-11_4.tif:0002-1126-0203:c:2/4 - KAN700-11_4	0.386	893.701	345.386	26811	3.345
50	KAN700-11_4.tif:0002-1185-0600:c:2/4 - KAN700-11_4	0.438	1088.61	476.807	37012.7	3.783
51	KAN700-11_4.tif:0002-0994-0827:c:2/4 - KAN700-11_4	0.348	1764.61	613.767	47644.4	3.005
52	KAN700-11_4.tif:0002-0911-1064:c:2/4 - KAN700-11_4	0.657	1610.7	1058.22	82145.8	5.72
53	KAN700-11_4.tif:0002-0546-0958:c:2/4 - KAN700-11_4	0.438	883.761	387.084	30047.9	3.758
54	KAN700-11_4.tif:0004-0921-1103:c:4/4 - KAN700-11_4	0.361	197.129	71.105	5519.61	3.088
55	KAN700-11_5.tif:0002-0102-0700:c:2/4 - KAN700-11_5	0.451	1667.37	751.783	58358.1	3.91
56	KAN700-11_5.tif:0002-0431-0633:c:2/4 - KAN700-11_5	0.567	1175.66	666.388	51729.2	4.886
57	KAN700-11_5.tif:0002-0133-1145:c:2/4 - KAN700-11_5	0.515	1087.81	560.535	43512.2	4.495
58	KAN700-11_5.tif:0002-0248-1231:c:2/4 - KAN700-11_5	0.348	1476.88	513.688	39875.6	2.982
59	KAN700-11_5.tif:0002-0631-0802:c:2/4 - KAN700-11_5	0.477	3596.68	1714.33	133077	4.104
60	KAN700-11_5.tif:0002-0901-0114:c:2/4 - KAN700-11_5	0.567	1573.98	892.164	69255.3	4.972
61	KAN700-11_5.tif:0002-0797-0202:c:2/4 - KAN700-11_5	0.412	1272.08	524.393	40706.6	3.601
62	KAN700-11_5.tif:0002-1065-0213:c:2/4 - KAN700-11_5	0.541	1193.88	645.955	50143	4.714
63	KAN700-11_5.tif:0002-0803-0500:c:2/4 - KAN700-11_5	0.283	1499.07	424.85	32979.5	2.421
64	KAN700-11_5.tif:0002-0795-0867:c:2/4 - KAN700-11_5	0.206	1461.39	301.216	23382.2	1.736
65	KAN700-11_5.tif:0002-1005-1138:c:2/4 - KAN700-11_5	0.451	970.597	437.622	33970.9	3.947
						3.88448
						0.218618
1	KAN700-12_1.tif:0002-0212-0215:c:2/4 - KAN700-12_1	0.464	1279.26	593.271	46053.4	4.043
2	KAN700-12_1.tif:0002-0593-0089:c:2/4 - KAN700-12_1	0.605	1773.82	1073.99	83369.4	5.307
3	KAN700-12_1.tif:0002-0792-0062:c:2/4 - KAN700-12_1	0.683	1232.28	841.354	65311.1	6.011
4	KAN700-12_1.tif:0002-0720-0169:c:2/4 - KAN700-12_1	0.412	1574.13	648.907	50372.2	3.564
5	KAN700-12_1.tif:0002-0913-0317:c:2/4 - KAN700-12_1	0.464	794.721	368.561	28610	4.09
6	KAN700-12_1.tif:0002-0835-0700:c:2/4 - KAN700-12_1	0.322	1712.21	551.427	42805.2	2.759
7	KAN700-12_1.tif:0002-0903-0679:c:2/4 - KAN700-12_1	0.618	1720.49	1063.86	82583.6	5.457
8	KAN700-12_1.tif:0002-0239-0419:c:2/4 - KAN700-12_1	0.399	1054.14	420.972	32678.5	3.484
9	KAN700-12_1.tif:0002-0237-0520:c:2/4 - KAN700-12_1	0.528	1072.73	566.588	43982.1	4.575
10	KAN700-12_1.tif:0002-0467-0498:c:2/4 - KAN700-12_1	0.374	2111.42	788.795	61231.2	3.219
11	KAN700-12_1.tif:0002-0559-0893:c:2/4 - KAN700-12_1	0.58	1123.7	651.413	50566.7	5.041
12	KAN700-12_1.tif:0002-0923-1142:c:2/4 - KAN700-12_1	0.322	1943.79	626.01	48594.8	2.772
13	KAN700-12_1.tif:0002-1164-0516:c:2/4 - KAN700-12_1	0.412	1258.02	518.597	40256.7	3.555
14	KAN700-12_1.tif:0002-0022-0955:c:2/4 - KAN700-12_1	0.412	1508.15	621.707	48260.7	3.607
15	KAN700-12_1.tif:0002-0141-1092:c:2/4 - KAN700-12_1	0.232	3137.68	727.567	56478.3	2.107
16	KAN700-12_2.tif:0002-0804-0205:c:2/4 - KAN700-12_2	0.49	1043.29	510.717	39645	4.26
17	KAN700-12_2.tif:0002-0484-0177:c:2/4 - KAN700-12_2	0.541	922.48	499.112	38744.1	4.73
18	KAN700-12_2.tif:0002-0350-0389:c:2/4 - KAN700-12_2	0.348	1755.91	610.743	47409.6	3.053
19	KAN700-12_2.tif:0002-0532-0430:c:2/4 - KAN700-12_2	0.322	910.735	293.308	22768.4	2.839
20	KAN700-12_2.tif:0002-0707-0458:c:2/4 - KAN700-12_2	0.618	1503.15	929.471	72151.2	5.366
21	KAN700-12_2.tif:0002-0912-0559:c:2/4 - KAN700-12_2	0.386	2714.96	1049.24	81448.8	3.393
22	KAN700-12_2.tif:0002-1084-0714:c:2/4 - KAN700-12_2	0.786	1182.17	928.968	72112.3	6.832
23	KAN700-12_2.tif:0002-0586-0741:c:2/4 - KAN700-12_2	0.502	1910.92	960.061	74525.9	4.384
24	KAN700-12_2.tif:0002-0179-0668:c:2/4 - KAN700-12_2	0.438	982.713	430.425	33412.3	3.84
25	KAN700-12_2.tif:0002-0054-0842:c:2/4 - KAN700-12_2	0.386	786.208	303.844	23586.2	3.338
26	KAN700-12_2.tif:0002-0023-0929:c:2/4 - KAN700-12_2	0.322	1791.5	576.963	44787.5	2.787
27	KAN700-12_2.tif:0002-0451-0943:c:2/4 - KAN700-12_2	0.335	1946.12	651.831	50599.2	2.928
28	KAN700-12_2.tif:0002-0390-1148:c:2/4 - KAN700-12_2	0.49	1660.48	812.848	63098.3	4.297
29	KAN700-12_2.tif:0002-0020-1220:c:2/4 - KAN700-12_2	0.477	2116.92	1009.01	78325.9	4.135
30	KAN700-12_3.tif:0002-0143-0513:c:2/4 - KAN700-12_3	0.116	1570.09	182.037	14130.8	1
31	KAN700-12_3.tif:0002-0033-0333:c:2/4 - KAN700-12_3	0.374	2269.61	847.891	65818.6	3.193
32	KAN700-12_3.tif:0002-0264-0615:c:2/4 - KAN700-12_3	0.399	2108.02	841.838	65348.6	3.522
33	KAN700-12_3.tif:0002-0779-0622:c:2/4 - KAN700-12_3	0.554	1551.07	859.195	66696	4.773
34	KAN700-12_3.tif:0002-0143-0406:c:2/4 - KAN700-12_3	0.412	1578.95	650.893	50526.3	3.566
35	KAN700-12_3.tif:0002-0691-0198:c:2/4 - KAN700-12_3	0.528	928.944	490.642	38086.7	4.589
36	KAN700-12_3.tif:0002-0462-0094:c:2/4 - KAN700-12_3	0.502	1106.44	555.887	43151.4	4.37
37	KAN700-12_3.tif:0002-0702-0105:c:2/4 - KAN700-12_3	0.477	1011.98	482.354	37443.3	4.146
38	KAN700-12_3.tif:0002-1110-0155:c:2/4 - KAN700-12_3	0.425	1215.15	516.579	40100	3.723
39	KAN700-12_3.tif:0002-0927-0775:c:2/4 - KAN700-12_3	0.515	850.88	438.45	34035.2	4.523
40	KAN700-12_3.tif:0002-1248-0852:c:2/4 - KAN700-12_3	0.49	1780.57	871.633	67661.5	4.27
41	KAN700-12_3.tif:0002-1191-1113:c:2/4 - KAN700-12_3	0.232	2019.45	468.272	36350.2	1.982
42	KAN700-12_3.tif:0002-0437-1186:c:2/4 - KAN700-12_3	0.554	1716.62	950.901	73814.8	4.873
43	KAN700-12_3.tif:0002-0205-1105:c:2/4 - KAN700-12_3	0.374	975.468	364.421	28288.6	3.291
44	KAN700-12_3.tif:0002-0064-1251:c:2/4 - KAN700-12_3	0.477	1988.88	947.987	73588.6	4.121
45	KAN700-12_4.tif:0002-0411-0115:c:2/4 - KAN700-12_4	0.335	1260.02	422.03	32760.6	2.847
46	KAN700-12_4.tif:0002-0665-0141:c:2/4 - KAN700-12_4	0.386	1120.95	433.213	33628.7	3.361
47	KAN700-12_4.tif:0002-0865-0249:c:2/4 - KAN700-12_4	0.49	725.818	355.306	27581.1	4.294
48	KAN700-12_4.tif:0002-0758-0384:c:2/4 - KAN700-12_4	0.322	1204.45	387.9	30111.2	2.844
49	KAN700-12_4.tif:0002-0079-0179:c:2/4 - KAN700-12_4	0.335	861.32	288.489	22394.3	2.982
50	KAN700-12_4.tif:0002-0224-0642:c:2/4 - KAN700-12_4	0.412	1265.78	521.795	40505	3.611
51	KAN700-12_4.tif:0002-0672-0979:c:2/4 - KAN700-12_4	0.49	1085.71	531.482	41256.9	4.319
52	KAN700-12_4.tif:0002-0172-1176:c:2/4 - KAN700-12_4	0.49	1068.43	523.025	40600.4	4.305
53	KAN700-12_4.tif:0002-0917-1059:c:2/4 - KAN700-12_4	0.399	1322.55	528.159	40999	3.475
54	KAN700-12_4.tif:0002-1044-0803:c:2/4 - KAN700-12_4	0.232	1284.16	297.771	23114.8	1.931
55	KAN700-12_4.tif:0002-1212-1138:c:2/4 - KAN700-12_4	0.502	2204.94	1107.78	85992.6	4.389
56	KAN700-12_5.tif:0002-0227-0050:c:2/4 - KAN700-12_5	0.477	1226.08	584.402	45364.9	4.086
57	KAN700-12_5.tif:0002-0601-0100:c:2/4 - KAN700-12_5	0.554	1113.11	616.59	47863.5	4.845
58	KAN700-12_5.tif:0002-0493-0331:c:2/4 - KAN700-12_5	0.412	1582.32	652.284	50634.3	3.528
59	KAN700-12_5.tif:0002-0664-0432:c:2/4 - KAN700-12_5	0.335	781.519	261.761	20319.5	2.884
60	KAN700-12_5.tif:0002-0831-0359:c:2/4 - KAN700-12_5	0.348	2457.47	854.759	66351.7	3.018
61	KAN700-12_5.tif:0002-0920-0261:c:2/4 - KAN700-12_5	0.193	1584.33	306.145	23764.9	1.597
62	KAN700-12_5.tif:0002-0787-0121:c:2/4 - KAN700-12_5	0.296	1001.1	296.618	23025.3	2.548
63	KAN700-12_5.tif:0002-0803-0526:c:2/4 - KAN700-12_5	0.399	2180.98	870.972	67610.3	3.522
64	KAN700-12_5.tif:0002-0934-0636:c:2/4 - KAN700-12_5	0.348	2981.1	1036.89	80489.7	3.038
65	KAN700-12_5.tif:0002-1059-0803:c:2/4 - KAN700-12_5	0.451	1300.52	586.375	45518	3.934
66	KAN700-12_5.tif:0002-1226-0711:c:2/4 - KAN700-12_5	0.386	1732.01	669.366	51960.3	3.345
67	KAN700-12_5.tif:0002-1065-0286:c:2/4 - KAN700-12_5	0.502	1236	620.975	48203.9	4.429
68	KAN700-12_5.tif:0002-0301-0536:c:2/4 - KAN700-12_5	0.425	3611.43	1535.27	119177	3.738
69	KAN700-12_5.tif:0002-0185-0557:c:2/4 - KAN700-12_5	0.335	1593.2	533.625	41423.3	2.944
70	KAN700-12_5.tif:0002-0104-0835:c:2/4 - KAN700-12_5	0.322	3500.85	1127.47	87521.2	2.765
71	KAN700-12_5.tif:0002-0175-1031:c:2/4 - KAN700-12_5	0.271	2788.44	754.349	58557.2	2.363
72	KAN700-12_5.tif:0002-0041-1247:c:2/4 - KAN700-12_5	0.528	1800.1	950.762	73804	4.629
73	KAN700-12_5.tif:0002-0612-1188:c:2/4 - KAN700-12_5	0.322	1597.56	514.505	39939	2.838
74	KAN700-12_5.tif:0002-0733-1027:c:2/4 - KAN700-12_5	0.271	2255.44	610.157	47364.2	2.3
						3.68141
						0.940088

## Sheet: IF condition
Exp. number	Cell line	Culture condition	Fixation condition	rabbit-Alexa488	mouse IgG1-Alexa568	mouse IgG2b-Alexa647	Nuclear stain	Date	Replicate
KAN700-1	RPE-BFP-Cas9 sgSafe (pool)	serum starved for 24 hours	fixed in 4% PFA at RT for 15 mintues	ARL13B, Proteintech, 17711-1-AP, 1:1000	CEP170, Invitrogen, 41-3200, 1:1000	Ac-Tub, 6B-11, Santa Cruz, 1:1000	DAPI	2021-10-04
KAN700-2	RPE-BFP-Cas9 CEP164KO (pool)	serum starved for 24 hours	fixed in 4% PFA at RT for 15 mintues	ARL13B, Proteintech, 17711-1-AP, 1:1000	CEP170, Invitrogen, 41-3200, 1:1000	Ac-Tub, 6B-11, Santa Cruz, 1:1000	DAPI	2021-10-04
KAN700-3	RPE-BFP-Cas9 CEP83 KO (pool)	serum starved for 24 hours	fixed in 4% PFA at RT for 15 mintues	ARL13B, Proteintech, 17711-1-AP, 1:1000	CEP170, Invitrogen, 41-3200, 1:1000	Ac-Tub, 6B-11, Santa Cruz, 1:1000	DAPI	2021-10-04
KAN700-4	RPE-BFP-Cas9 SCLT1 KO (pool)	serum starved for 24 hours	fixed in 4% PFA at RT for 15 mintues	ARL13B, Proteintech, 17711-1-AP, 1:1000	CEP170, Invitrogen, 41-3200, 1:1000	Ac-Tub, 6B-11, Santa Cruz, 1:1000	DAPI	2021-10-04
KAN700-5	RPE-BFP-Cas9 FBF1 KO (pool)	serum starved for 24 hours	fixed in 4% PFA at RT for 15 mintues	ARL13B, Proteintech, 17711-1-AP, 1:1000	CEP170, Invitrogen, 41-3200, 1:1000	Ac-Tub, 6B-11, Santa Cruz, 1:1000	DAPI	2021-10-04
KAN700-6	RPE-BFP-Cas9 CEP89KO (pool)	serum starved for 24 hours	fixed in 4% PFA at RT for 15 mintues	ARL13B, Proteintech, 17711-1-AP, 1:1000	CEP170, Invitrogen, 41-3200, 1:1000	Ac-Tub, 6B-11, Santa Cruz, 1:1000	DAPI	2021-10-04
KAN700-7	RPE-BFP-Cas9 CCDC92 KO (pool)	serum starved for 24 hours	fixed in 4% PFA at RT for 15 mintues	ARL13B, Proteintech, 17711-1-AP, 1:1000	CEP170, Invitrogen, 41-3200, 1:1000	Ac-Tub, 6B-11, Santa Cruz, 1:1000	DAPI	2021-10-04
KAN700-8	RPE-BFP-Cas9 ANKRD26 KO (pool)	serum starved for 24 hours	fixed in 4% PFA at RT for 15 mintues	ARL13B, Proteintech, 17711-1-AP, 1:1000	CEP170, Invitrogen, 41-3200, 1:1000	Ac-Tub, 6B-11, Santa Cruz, 1:1000	DAPI	2021-10-04
KAN700-9	RPE-BFP-Cas9 TTBK2 KO (pool)	serum starved for 24 hours	fixed in 4% PFA at RT for 15 mintues	ARL13B, Proteintech, 17711-1-AP, 1:1000	CEP170, Invitrogen, 41-3200, 1:1000	Ac-Tub, 6B-11, Santa Cruz, 1:1000	DAPI	2021-10-04
KAN700-10	RPE-BFP-Cas9 INPP5E KO (pool)	serum starved for 24 hours	fixed in 4% PFA at RT for 15 mintues	ARL13B, Proteintech, 17711-1-AP, 1:1000	CEP170, Invitrogen, 41-3200, 1:1000	Ac-Tub, 6B-11, Santa Cruz, 1:1000	DAPI	2021-10-04
KAN700-11	RPE-BFP-Cas9 Kiz KO (pool)	serum starved for 24 hours	fixed in 4% PFA at RT for 15 mintues	ARL13B, Proteintech, 17711-1-AP, 1:1000	CEP170, Invitrogen, 41-3200, 1:1000	Ac-Tub, 6B-11, Santa Cruz, 1:1000	DAPI	2021-10-04
KAN700-12	RPE-BFP-Cas9 LRRC45 KO (pool)	serum starved for 24 hours	fixed in 4% PFA at RT for 15 mintues	ARL13B, Proteintech, 17711-1-AP, 1:1000	CEP170, Invitrogen, 41-3200, 1:1000	Ac-Tub, 6B-11, Santa Cruz, 1:1000	DAPI	2021-10-04

## Sheet: Statistics#1
	Table Analyzed	Data 1		Table Analyzed	Data 1		Table Analyzed	Data 1		Table Analyzed	Data 1		Table Analyzed	Data 1		Table Analyzed	Data 1
	Column B	FBF1 KO		Column C	CEP89 KO		Column E	ANKRD26 KO		Column F	INPP5E KO		Column G	KIZ KO		Column H	LRRC45 KO
	vs.	vs.		vs.	vs.		vs.	vs.		vs.	vs.		vs.	vs.		vs.	vs.
	Column A	sgSafe		Column A	sgSafe		Column A	sgSafe		Column A	sgSafe		Column A	sgSafe		Column A	sgSafe
	Unpaired t test with Welch's correction			Unpaired t test with Welch's correction			Unpaired t test with Welch's correction			Unpaired t test with Welch's correction			Unpaired t test with Welch's correction			Unpaired t test with Welch's correction
	P value	0.0461		P value	0.2891		P value	<0.0001		P value	0.0022		P value	0.2184		P value	0.9393
	P value summary	*		P value summary	ns		P value summary	****		P value summary	**		P value summary	ns		P value summary	ns
	Significantly different (P < 0.05)?	Yes		Significantly different (P < 0.05)?	No		Significantly different (P < 0.05)?	Yes		Significantly different (P < 0.05)?	Yes		Significantly different (P < 0.05)?	No		Significantly different (P < 0.05)?	No
	One- or two-tailed P value?	Two-tailed		One- or two-tailed P value?	Two-tailed		One- or two-tailed P value?	Two-tailed		One- or two-tailed P value?	Two-tailed		One- or two-tailed P value?	Two-tailed		One- or two-tailed P value?	Two-tailed
	Welch-corrected t, df	t=2.017, df=111.4		Welch-corrected t, df	t=1.065, df=120.5		Welch-corrected t, df	t=4.868, df=127.3		Welch-corrected t, df	t=3.130, df=127.9		Welch-corrected t, df	t=1.237, df=126.7		Welch-corrected t, df	t=0.07628, df=135.9
	How big is the difference?			How big is the difference?			How big is the difference?			How big is the difference?			How big is the difference?			How big is the difference?
	Mean of column A	3.694		Mean of column A	3.694		Mean of column A	3.694		Mean of column A	3.694		Mean of column A	3.694		Mean of column A	3.694
	Mean of column B	3.332		Mean of column C	3.516		Mean of column E	2.907		Mean of column F	3.181		Mean of column G	3.884		Mean of column H	3.681
	Difference between means (B - A) ± SEM	-0.3615 ± 0.1792		Difference between means (C - A) ± SEM	-0.1770 ± 0.1663		Difference between means (E - A) ± SEM	-0.7869 ± 0.1616		Difference between means (F - A) ± SEM	-0.5121 ± 0.1636		Difference between means (G - A) ± SEM	0.1910 ± 0.1544		Difference between means (H - A) ± SEM	-0.01211 ± 0.1588
	95% confidence interval	-0.7166 to -0.006370		95% confidence interval	-0.5062 to 0.1521		95% confidence interval	-1.107 to -0.4671		95% confidence interval	-0.8358 to -0.1884		95% confidence interval	-0.1145 to 0.4965		95% confidence interval	-0.3261 to 0.3019
	R squared (eta squared)	0.03524		R squared (eta squared)	0.009322		R squared (eta squared)	0.1569		R squared (eta squared)	0.07115		R squared (eta squared)	0.01193		R squared (eta squared)	4.283e-05
	F test to compare variances			F test to compare variances			F test to compare variances			F test to compare variances			F test to compare variances			F test to compare variances
	F, DFn, Dfd	1.764, 60, 63		F, DFn, Dfd	1.431, 62, 63		F, DFn, Dfd	1.382, 66, 63		F, DFn, Dfd	1.462, 67, 63		F, DFn, Dfd	1.133, 64, 63		F, DFn, Dfd	1.431, 73, 63
	P value	0.0272		P value	0.159		P value	0.1984		P value	0.1299		P value	0.6202		P value	0.1466
	P value summary	*		P value summary	ns		P value summary	ns		P value summary	ns		P value summary	ns		P value summary	ns
	Significantly different (P < 0.05)?	Yes		Significantly different (P < 0.05)?	No		Significantly different (P < 0.05)?	No		Significantly different (P < 0.05)?	No		Significantly different (P < 0.05)?	No		Significantly different (P < 0.05)?	No
	Data analyzed			Data analyzed			Data analyzed			Data analyzed			Data analyzed			Data analyzed
	Sample size, column A	64		Sample size, column A	64		Sample size, column A	64		Sample size, column A	64		Sample size, column A	64		Sample size, column A	64
	Sample size, column B	61		Sample size, column C	63		Sample size, column E	67		Sample size, column F	68		Sample size, column G	65		Sample size, column H	74
