# Supplementary material for: A hierarchical pathway for assembly of the distal appendages that organize primary cilia
Source: eLife. 2025 Jan 30;14:e85999. doi: 10.7554/eLife.85999 (PMC11984956; doi:10.7554/eLife.85999)
Supplement: Figure 5—figure supplement 1—source data 2. [file elife-85999-fig5-figsupp1-data2.xlsx]

## Sheet: Raw data
	Label	Area	Mean	IntDen	RawIntDen	Length
1	KAN583-1_1.tif:0002-0103-0134:c:2/4 - KAN583-1_1	0.52	1168.85	607.839	23377	3.08
2	KAN583-1_1.tif:0002-0122-0341:c:2/4 - KAN583-1_1	0.572	2708.13	1549.15	59579	3.536
3	KAN583-1_1.tif:0002-0210-0275:c:2/4 - KAN583-1_1	0.364	1860.19	677.149	26042.6	2.214
4	KAN583-1_1.tif:0002-0442-0204:c:2/4 - KAN583-1_1	0.65	1609.04	1045.94	40225.9	3.916
5	KAN583-1_1.tif:0002-0616-0325:c:2/4 - KAN583-1_1	0.442	2097.03	926.944	35649.6	2.718
6	KAN583-1_1.tif:0002-0559-0115:c:2/4 - KAN583-1_1	0.494	1842.26	910.132	35003	2.909
7	KAN583-1_1.tif:0002-0715-0135:c:2/4 - KAN583-1_1	0.468	776.625	363.482	13979.2	2.841
8	KAN583-1_1.tif:0002-0918-0216:c:2/4 - KAN583-1_1	0.39	1054.2	411.161	15812.9	2.4
9	KAN583-1_1.tif:0002-0574-0419:c:2/4 - KAN583-1_1	0.65	1210.09	786.606	30252.2	4.022
10	KAN583-1_1.tif:0002-0389-0648:c:2/4 - KAN583-1_1	0.624	2201.79	1374	52842.9	3.815
11	KAN583-1_1.tif:0002-0143-0580:c:2/4 - KAN583-1_1	0.442	1748.88	773.053	29731	2.631
12	KAN583-1_1.tif:0002-0019-0785:c:2/4 - KAN583-1_1	0.598	1728.25	1033.56	39749.8	3.711
13	KAN583-1_1.tif:0002-0124-0965:c:2/4 - KAN583-1_1	0.442	1762.14	778.913	29956.4	2.737
14	KAN583-1_1.tif:0002-0061-1009:c:2/4 - KAN583-1_1	0.39	1405.48	548.169	21082.2	2.311
15	KAN583-1_1.tif:0002-0269-1055:c:2/4 - KAN583-1_1	0.39	2544	992.22	38160	2.292
16	KAN583-1_1.tif:0002-0395-1039:c:2/4 - KAN583-1_1	0.572	3754.18	2147.52	82591.9	3.424
17	KAN583-1_1.tif:0002-0523-0982:c:2/4 - KAN583-1_1	0.416	1245.63	518.212	19930	2.569
18	KAN583-1_1.tif:0002-0630-0707:c:2/4 - KAN583-1_1	0.468	1094.51	512.26	19701.1	2.899
19	KAN583-1_1.tif:0002-0982-0741:c:2/4 - KAN583-1_1	0.52	1752.39	911.298	35047.8	3.144
20	KAN583-1_1.tif:0002-0680-0960:c:2/4 - KAN583-1_1	0.468	1098	513.894	19764	2.903
21	KAN583-1_1.tif:0002-0735-1008:c:2/4 - KAN583-1_1	0.364	1137.87	414.211	15930.2	2.096
22	KAN583-1_1.tif:0002-0452-1309:c:2/4 - KAN583-1_1	0.442	1933.37	854.601	32867.3	2.737
23	KAN583-1_1.tif:0002-0663-1364:c:2/4 - KAN583-1_1	0.416	993.917	413.495	15902.7	2.54
24	KAN583-1_2.tif:0002-0170-0268:c:2/4 - KAN583-1_2	0.416	1778.19	739.772	28451	2.524
25	KAN583-1_2.tif:0002-0143-0398:c:2/4 - KAN583-1_2	0.468	2414.67	1130.13	43464	2.849
26	KAN583-1_2.tif:0002-0189-0547:c:2/4 - KAN583-1_2	0.208	2302.45	478.938	18419.6	1.219
27	KAN583-1_2.tif:0002-0257-0705:c:2/4 - KAN583-1_2	0.416	2403.55	999.936	38456.8	2.435
28	KAN583-1_2.tif:0002-0011-0877:c:2/4 - KAN583-1_2	0.468	1074.48	502.889	19340.7	2.798
29	KAN583-1_2.tif:0002-0238-0928:c:2/4 - KAN583-1_2	0.52	1882.24	978.821	37644.7	3.113
30	KAN583-1_2.tif:0002-0254-1342:c:2/4 - KAN583-1_2	0.416	1514.49	630.067	24231.9	2.547
31	KAN583-1_2.tif:0002-0510-0521:c:2/4 - KAN583-1_2	0.572	1352.84	773.869	29762.4	3.399
32	KAN583-1_2.tif:0002-0520-0309:c:2/4 - KAN583-1_2	0.39	1676.59	653.911	25148.9	2.305
33	KAN583-1_2.tif:0002-0525-0157:c:2/4 - KAN583-1_2	0.416	1258.53	523.582	20136.5	2.476
34	KAN583-1_2.tif:0002-0489-0689:c:2/4 - KAN583-1_2	0.312	3271.38	1020.73	39256.5	1.911
35	KAN583-1_2.tif:0002-0399-1132:c:2/4 - KAN583-1_2	0.442	2057.88	909.639	34984	2.713
36	KAN583-1_2.tif:0002-0517-0990:c:2/4 - KAN583-1_2	0.416	2989.59	1243.74	47833.4	2.478
37	KAN583-1_2.tif:0002-0730-1267:c:2/4 - KAN583-1_2	0.442	1930.57	853.363	32819.7	2.643
38	KAN583-1_2.tif:0002-0796-0984:c:2/4 - KAN583-1_2	0.494	1251.97	618.51	23787.4	2.954
39	KAN583-1_2.tif:0002-0698-0687:c:2/4 - KAN583-1_2	0.52	1428.66	742.95	28573.3	3.224
40	KAN583-1_2.tif:0002-0892-0673:c:2/4 - KAN583-1_2	0.598	935.585	559.514	21518.5	3.699
41	KAN583-1_2.tif:0002-0929-0769:c:2/4 - KAN583-1_2	0.598	1480.48	885.378	34051	3.618
42	KAN583-1_2.tif:0002-0989-0274:c:2/4 - KAN583-1_2	0.546	1414.71	772.479	29708.9	3.276
43	KAN583-1_2.tif:0002-0863-0182:c:2/4 - KAN583-1_2	0.364	1326.78	482.976	18574.9	2.23
44	KAN583-1_2.tif:0002-0945-0393:c:2/4 - KAN583-1_2	0.338	805.592	272.306	10472.7	2.059
45	KAN583-1_2.tif:0002-0399-0950:c:2/4 - KAN583-1_2	0.338	1190.46	402.4	15476	1.943
46	KAN583-1_3.tif:0002-0121-0219:c:2/4 - KAN583-1_3	0.572	1002.6	573.52	22057.1	3.505
47	KAN583-1_3.tif:0002-0282-0025:c:2/4 - KAN583-1_3	0.364	978.896	356.339	13704.5	2.182
48	KAN583-1_3.tif:0002-0465-0180:c:2/4 - KAN583-1_3	0.416	1382.44	575.132	22119.1	2.552
49	KAN583-1_3.tif:0002-0454-0402:c:2/4 - KAN583-1_3	0.52	1599.43	831.755	31988.7	3.116
50	KAN583-1_3.tif:0002-0202-0391:c:2/4 - KAN583-1_3	0.364	3565.09	1297.77	49911.2	2.135
51	KAN583-1_3.tif:0002-0887-0078:c:2/4 - KAN583-1_3	0.416	2474.26	1029.35	39588.1	2.544
52	KAN583-1_3.tif:0002-0767-0386:c:2/4 - KAN583-1_3	0.572	1669.63	955.088	36732	3.501
53	KAN583-1_3.tif:0002-0634-0487:c:2/4 - KAN583-1_3	0.442	1910.18	844.349	32473	2.655
54	KAN583-1_3.tif:0002-0605-0586:c:2/4 - KAN583-1_3	0.52	1356.47	705.407	27129.4	3.082
55	KAN583-1_3.tif:0002-0576-0673:c:2/4 - KAN583-1_3	0.572	1776.85	1016.42	39090.8	3.493
56	KAN583-1_3.tif:0002-0515-0722:c:2/4 - KAN583-1_3	0.442	1788.55	790.589	30405.4	2.614
57	KAN583-1_3.tif:0002-0249-0670:c:2/4 - KAN583-1_3	0.468	2010.7	941.063	36192.6	2.785
58	KAN583-1_3.tif:0002-0109-0722:c:2/4 - KAN583-1_3	0.754	1138.84	858.739	33026.4	4.563
59	KAN583-1_3.tif:0002-0208-0764:c:2/4 - KAN583-1_3	0.806	1117.87	901.056	34653.9	4.907
60	KAN583-1_3.tif:0002-0152-0899:c:2/4 - KAN583-1_3	0.26	1740.41	452.534	17404.1	1.497
61	KAN583-1_3.tif:0002-0268-0955:c:2/4 - KAN583-1_3	0.728	1171.29	852.747	32796	4.386
62	KAN583-1_3.tif:0002-0399-0838:c:2/4 - KAN583-1_3	0.234	2656.03	621.547	23904.2	1.371
63	KAN583-1_3.tif:0002-0490-0917:c:2/4 - KAN583-1_3	0.39	1896.41	739.645	28446.2	2.36
64	KAN583-1_3.tif:0002-0105-1236:c:2/4 - KAN583-1_3	0.312	2680.42	836.343	32165.1	1.817
65	KAN583-1_3.tif:0004-0198-1223:c:4/4 - KAN583-1_3	0.39	274.946	107.235	4124.19	2.38
66	KAN583-1_3.tif:0003-0415-1128:c:3/4 - KAN583-1_3	0.572	1104.41	631.76	24297	3.469
67	KAN583-1_3.tif:0003-0390-1172:c:3/4 - KAN583-1_3	0.494	699.121	345.387	13283.3	2.921
68	KAN583-1_3.tif:0003-0611-1210:c:3/4 - KAN583-1_3	0.442	2336.81	1032.93	39725.7	2.671
69	KAN583-1_3.tif:0003-0853-1094:c:3/4 - KAN583-1_3	0.468	1732.81	811.001	31190.5	2.96
70	KAN583-1_3.tif:0003-0980-0978:c:3/4 - KAN583-1_3	0.39	1774.68	692.168	26620.2	2.332
71	KAN583-1_3.tif:0003-0940-0694:c:3/4 - KAN583-1_3	0.338	1805.52	610.302	23471.7	2.044
72	KAN583-1_3.tif:0003-1004-0565:c:3/4 - KAN583-1_3	0.598	1420.05	849.243	32661.2	3.566
73	KAN583-1_3.tif:0003-0644-1070:c:3/4 - KAN583-1_3	0.442	2190.3	968.169	37235	2.726
						2.82181
1	KAN583-5_1.tif:0002-0090-0015:c:2/4 - KAN583-5_1	0.442	1237.82	547.151	21043	2.666
2	KAN583-5_1.tif:0002-0150-0044:c:2/4 - KAN583-5_1	0.572	1121.01	641.254	24662.1	3.424
3	KAN583-5_1.tif:0002-0019-0281:c:2/4 - KAN583-5_1	0.676	804.413	543.816	20914.7	4.168
4	KAN583-5_1.tif:0002-0183-0412:c:2/4 - KAN583-5_1	0.39	2195.82	856.422	32937.3	2.392
5	KAN583-5_1.tif:0002-0117-0510:c:2/4 - KAN583-5_1	0.494	804.329	397.363	15282.3	3.008
6	KAN583-5_1.tif:0002-0173-0722:c:2/4 - KAN583-5_1	0.728	1358.33	988.926	38033.3	4.508
7	KAN583-5_1.tif:0002-0055-0949:c:2/4 - KAN583-5_1	0.416	1355.79	564.041	21692.6	2.487
8	KAN583-5_1.tif:0002-0042-1127:c:2/4 - KAN583-5_1	0.39	1037.07	404.482	15556.1	2.263
9	KAN583-5_1.tif:0002-0225-1155:c:2/4 - KAN583-5_1	0.598	846.086	505.99	19460	3.605
10	KAN583-5_1.tif:0002-0360-0558:c:2/4 - KAN583-5_1	0.234	771.053	180.437	6939.48	1.434
11	KAN583-5_1.tif:0002-0371-0274:c:2/4 - KAN583-5_1	0.39	691.235	269.598	10368.5	2.296
12	KAN583-5_1.tif:0002-0388-0129:c:2/4 - KAN583-5_1	0.364	865.317	314.994	12114.4	2.223
13	KAN583-5_1.tif:0002-0632-0227:c:2/4 - KAN583-5_1	0.494	1179.04	582.479	22401.7	3.007
14	KAN583-5_1.tif:0002-0677-0096:c:2/4 - KAN583-5_1	0.858	965.222	828.21	31852.3	5.255
15	KAN583-5_1.tif:0002-0737-0214:c:2/4 - KAN583-5_1	0.676	1382.01	934.293	35932.2	4.083
16	KAN583-5_1.tif:0002-0725-0458:c:2/4 - KAN583-5_1	0.572	1398.48	799.98	30766.6	3.456
17	KAN583-5_1.tif:0002-0494-0506:c:2/4 - KAN583-5_1	0.494	1414.12	698.619	26868.3	2.909
18	KAN583-5_1.tif:0002-0633-0608:c:2/4 - KAN583-5_1	0.546	1637.9	894.35	34396	3.31
19	KAN583-5_1.tif:0002-0617-0892:c:2/4 - KAN583-5_1	0.52	1389.24	722.446	27784.7	3.111
20	KAN583-5_1.tif:0002-0309-0946:c:2/4 - KAN583-5_1	0.572	681.419	389.795	14991.2	3.5
21	KAN583-5_1.tif:0002-0905-0560:c:2/4 - KAN583-5_1	0.286	1553.43	444.307	17087.7	1.613
22	KAN583-5_1.tif:0002-0407-0671:c:2/4 - KAN583-5_1	0.208	1830.44	380.754	14643.5	1.186
23	KAN583-5_1.tif:0002-0441-1085:c:2/4 - KAN583-5_1	0.286	1142.63	326.812	12568.9	1.682
24	KAN583-5_1.tif:0002-0708-1259:c:2/4 - KAN583-5_1	0.442	1616.76	714.65	27484.9	2.707
25	KAN583-5_1.tif:0002-0855-1086:c:2/4 - KAN583-5_1	0.364	2110.68	768.332	29549.5	2.234
26	KAN583-5_1.tif:0002-0965-1314:c:2/4 - KAN583-5_1	0.572	1252.73	716.608	27560.2	3.435
27	KAN583-5_1.tif:0002-0853-0862:c:2/4 - KAN583-5_1	0.52	724.379	376.7	14487.6	3.165
28	KAN583-5_2.tif:0002-0023-0707:c:2/4 - KAN583-5_2	0.572	1309.13	748.867	28800.9	3.452
29	KAN583-5_2.tif:0002-0228-0785:c:2/4 - KAN583-5_2	0.416	1547.39	643.755	24758.3	2.448
30	KAN583-5_2.tif:0002-0495-0872:c:2/4 - KAN583-5_2	0.442	2488.34	1099.91	42301.8	2.686
31	KAN583-5_2.tif:0002-0627-0829:c:2/4 - KAN583-5_2	0.442	2695.23	1191.36	45818.8	2.645
32	KAN583-5_2.tif:0002-0612-0458:c:2/4 - KAN583-5_2	0.442	2023.15	894.286	34393.6	2.656
33	KAN583-5_2.tif:0002-0798-0212:c:2/4 - KAN583-5_2	0.442	1823.09	805.853	30992.5	2.594
34	KAN583-5_2.tif:0002-0794-0481:c:2/4 - KAN583-5_2	0.39	1081.96	421.992	16229.5	2.35
35	KAN583-5_2.tif:0002-0806-0537:c:2/4 - KAN583-5_2	0.286	3672.84	1050.49	40401.2	1.64
36	KAN583-5_2.tif:0002-0962-0457:c:2/4 - KAN583-5_2	0.338	2694.23	910.704	35025	2.012
37	KAN583-5_2.tif:0002-0905-0898:c:2/4 - KAN583-5_2	0.416	1811.18	753.497	28978.9	2.486
38	KAN583-5_2.tif:0002-0768-0971:c:2/4 - KAN583-5_2	0.468	1999.13	935.648	35984.3	2.759
39	KAN583-5_2.tif:0002-0306-0998:c:2/4 - KAN583-5_2	0.338	2570.04	868.725	33410.5	1.94
40	KAN583-5_2.tif:0002-0087-1122:c:2/4 - KAN583-5_2	0.494	1179.16	582.54	22404	3.061
41	KAN583-5_2.tif:0002-0483-1329:c:2/4 - KAN583-5_2	0.442	1027.97	454.389	17475.5	2.668
42	KAN583-5_3.tif:0002-0302-0129:c:2/4 - KAN583-5_3	0.546	1190.23	649.905	24994.8	3.255
43	KAN583-5_3.tif:0002-0103-0175:c:2/4 - KAN583-5_3	0.468	1597.05	747.466	28747	2.892
44	KAN583-5_3.tif:0002-0647-0323:c:2/4 - KAN583-5_3	0.52	3010.67	1565.64	60213.3	3.078
45	KAN583-5_3.tif:0002-0849-0177:c:2/4 - KAN583-5_3	0.494	1732.92	856.114	32925.5	2.977
46	KAN583-5_3.tif:0002-0776-0350:c:2/4 - KAN583-5_3	0.52	1367.18	710.977	27343.6	3.177
47	KAN583-5_3.tif:0002-0769-0621:c:2/4 - KAN583-5_3	0.416	1671.13	695.234	26738.2	2.446
48	KAN583-5_3.tif:0002-0764-0752:c:2/4 - KAN583-5_3	0.312	4004.08	1249.35	48049	1.799
49	KAN583-5_3.tif:0002-0605-0777:c:2/4 - KAN583-5_3	0.338	1297.8	438.682	16871.4	2.092
50	KAN583-5_3.tif:0002-0308-0454:c:2/4 - KAN583-5_3	0.39	2071.39	807.893	31070.9	2.317
51	KAN583-5_3.tif:0002-0356-0688:c:2/4 - KAN583-5_3	0.442	2544.9	1124.91	43263.2	2.653
52	KAN583-5_3.tif:0002-0204-0864:c:2/4 - KAN583-5_3	0.338	1701.94	575.292	22125.3	2.063
53	KAN583-5_3.tif:0002-0459-1008:c:2/4 - KAN583-5_3	0.312	1262.78	394.011	15153.4	1.829
54	KAN583-5_3.tif:0002-0308-1252:c:2/4 - KAN583-5_3	0.39	1489.09	580.781	22336.4	2.329
55	KAN583-5_3.tif:0002-0814-1267:c:2/4 - KAN583-5_3	0.624	1355.97	846.177	32543.3	3.798
56	KAN583-5_3.tif:0003-0100-1169:c:3/4 - KAN583-5_3	0.234	1226.12	286.928	11035	1.444
						2.7263
						0.468551
1	KAN583-6_1.tif:0002-0131-0348:c:2/4 - KAN583-6_1	0.312	2053.61	640.766	24643.4	1.987
2	KAN583-6_1.tif:0002-0185-0118:c:2/4 - KAN583-6_1	0.39	1090.93	425.49	16364	2.373
3	KAN583-6_1.tif:0002-0479-0075:c:2/4 - KAN583-6_1	0.468	1105.85	517.567	19905.2	2.812
4	KAN583-6_1.tif:0002-0640-0207:c:2/4 - KAN583-6_1	0.364	1171.54	426.467	16401.6	2.173
5	KAN583-6_1.tif:0002-0564-0319:c:2/4 - KAN583-6_1	0.676	653.548	441.825	16992.2	4.102
6	KAN583-6_1.tif:0002-0692-0503:c:2/4 - KAN583-6_1	0.546	1589.58	867.965	33381.3	3.243
7	KAN583-6_1.tif:0002-0219-0637:c:2/4 - KAN583-6_1	0.52	1959.82	1019.17	39196.4	3.195
8	KAN583-6_1.tif:0002-0259-0539:c:2/4 - KAN583-6_1	0.338	1052.62	355.807	13684.1	2.006
9	KAN583-6_1.tif:0002-0051-0560:c:2/4 - KAN583-6_1	0.338	2345.83	792.939	30495.8	2.073
10	KAN583-6_1.tif:0002-0101-0693:c:2/4 - KAN583-6_1	0.598	1421.86	850.322	32702.7	3.636
11	KAN583-6_1.tif:0002-0207-0744:c:2/4 - KAN583-6_1	0.442	1358.56	600.521	23095.6	2.662
12	KAN583-6_1.tif:0002-0331-0802:c:2/4 - KAN583-6_1	0.286	3682.53	1053.27	40507.8	1.692
13	KAN583-6_1.tif:0002-0416-0820:c:2/4 - KAN583-6_1	0.39	2429.49	947.557	36442.3	2.348
14	KAN583-6_1.tif:0002-0489-0880:c:2/4 - KAN583-6_1	0.598	707.248	422.96	16266.7	3.55
15	KAN583-6_1.tif:0002-0635-0911:c:2/4 - KAN583-6_1	0.52	1366.87	710.813	27337.3	3.121
16	KAN583-6_1.tif:0002-0934-0869:c:2/4 - KAN583-6_1	0.416	1663.6	692.098	26617.5	2.473
17	KAN583-6_1.tif:0002-0943-0564:c:2/4 - KAN583-6_1	0.39	1300.67	507.29	19510	2.313
18	KAN583-6_1.tif:0002-0834-0802:c:2/4 - KAN583-6_1	0.208	1410.5	293.402	11284	1.283
19	KAN583-6_1.tif:0002-0596-1058:c:2/4 - KAN583-6_1	0.416	2996.17	1246.48	47938.7	2.507
20	KAN583-6_1.tif:0002-0461-1137:c:2/4 - KAN583-6_1	0.468	2480.91	1161.14	44656.4	2.785
21	KAN583-6_1.tif:0002-0370-1015:c:2/4 - KAN583-6_1	0.416	1301.4	541.416	20822.4	2.458
22	KAN583-6_1.tif:0002-0268-1038:c:2/4 - KAN583-6_1	0.416	1411.99	587.423	22591.8	2.527
23	KAN583-6_1.tif:0002-0225-0913:c:2/4 - KAN583-6_1	0.39	1139.1	444.275	17086.5	2.333
24	KAN583-6_1.tif:0002-0116-0988:c:2/4 - KAN583-6_1	0.416	1711.52	712.035	27384.3	2.537
25	KAN583-6_1.tif:0002-0174-1210:c:2/4 - KAN583-6_1	0.598	1717.62	1027.2	39505.3	3.586
26	KAN583-6_1.tif:0002-0082-1083:c:2/4 - KAN583-6_1	0.598	1837.45	1098.86	42261.4	3.66
27	KAN583-6_1.tif:0002-0357-1217:c:2/4 - KAN583-6_1	0.52	1483.37	771.398	29667.4	3.2
28	KAN583-6_1.tif:0002-0038-1150:c:2/4 - KAN583-6_1	0.468	1718.42	804.271	30931.6	2.804
29	KAN583-6_2.tif:0002-0078-0156:c:2/4 - KAN583-6_2	0.416	1261.78	524.933	20188.5	2.448
30	KAN583-6_2.tif:0002-0046-0205:c:2/4 - KAN583-6_2	0.494	1055.89	521.642	20062	2.962
31	KAN583-6_2.tif:0002-0227-0397:c:2/4 - KAN583-6_2	0.572	1122.2	641.936	24688.4	3.557
32	KAN583-6_2.tif:0003-0070-0569:c:3/4 - KAN583-6_2	0.572	1454.58	832.067	32000.6	3.444
33	KAN583-6_2.tif:0003-0175-0658:c:3/4 - KAN583-6_2	0.416	2210.71	919.712	35371.4	2.582
34	KAN583-6_2.tif:0003-0179-0830:c:3/4 - KAN583-6_2	0.494	2451.26	1211	46574	2.916
35	KAN583-6_2.tif:0003-0243-0836:c:3/4 - KAN583-6_2	0.39	1460.76	569.729	21911.3	2.356
36	KAN583-6_2.tif:0003-0409-0700:c:3/4 - KAN583-6_2	0.312	2607.93	813.722	31295.1	1.85
37	KAN583-6_2.tif:0003-0555-0328:c:3/4 - KAN583-6_2	0.442	1606.32	710.036	27307.4	2.728
38	KAN583-6_2.tif:0003-0605-0264:c:3/4 - KAN583-6_2	0.364	1603.01	583.531	22442.1	2.187
39	KAN583-6_2.tif:0003-0667-0331:c:3/4 - KAN583-6_2	0.494	1624.44	802.523	30864.4	2.949
40	KAN583-6_2.tif:0003-0843-0158:c:3/4 - KAN583-6_2	0.546	1196.81	653.498	25133	3.342
41	KAN583-6_2.tif:0003-0751-0371:c:3/4 - KAN583-6_2	0.468	1751.03	819.531	31518.5	2.818
42	KAN583-6_2.tif:0003-0630-0458:c:3/4 - KAN583-6_2	0.442	1680.14	742.668	28562.4	2.593
43	KAN583-6_2.tif:0003-0559-0497:c:3/4 - KAN583-6_2	0.364	1854.54	675.093	25963.6	2.256
44	KAN583-6_2.tif:0003-0719-0459:c:3/4 - KAN583-6_2	0.416	2726.28	1134.2	43620.4	2.569
45	KAN583-6_2.tif:0003-0426-0966:c:3/4 - KAN583-6_2	0.416	1714.64	713.335	27434.3	2.562
46	KAN583-6_2.tif:0003-0610-1026:c:3/4 - KAN583-6_2	0.442	2469.12	1091.42	41975.1	2.714
47	KAN583-6_2.tif:0003-0857-0633:c:3/4 - KAN583-6_2	0.39	2493.4	972.486	37401	2.274
48	KAN583-6_2.tif:0003-0676-0608:c:3/4 - KAN583-6_2	0.286	1810.28	517.771	19913.1	1.666
49	KAN583-6_2.tif:0003-0612-0795:c:3/4 - KAN583-6_2	0.234	1202.95	281.507	10826.5	1.392
50	KAN583-6_2.tif:0003-0764-1123:c:3/4 - KAN583-6_2	0.494	1158.01	572.092	22002.2	2.924
51	KAN583-6_3.tif:0002-0080-0220:c:2/4 - KAN583-6_3	0.494	1289.84	637.219	24507	2.998
52	KAN583-6_3.tif:0002-0573-0083:c:2/4 - KAN583-6_3	0.598	709.207	424.131	16311.8	3.665
53	KAN583-6_3.tif:0002-0652-0063:c:2/4 - KAN583-6_3	0.546	1300.76	710.258	27316	3.23
54	KAN583-6_3.tif:0002-0702-0084:c:2/4 - KAN583-6_3	0.52	790.548	411.11	15811	3.07
55	KAN583-6_3.tif:0002-0744-0227:c:2/4 - KAN583-6_3	0.52	1651.23	858.692	33024.6	3.093
56	KAN583-6_3.tif:0002-0827-0226:c:2/4 - KAN583-6_3	0.364	1574.05	572.989	22036.7	2.256
57	KAN583-6_3.tif:0002-0935-0049:c:2/4 - KAN583-6_3	0.702	1223.96	859.272	33046.9	4.353
58	KAN583-6_3.tif:0002-0932-0367:c:2/4 - KAN583-6_3	0.494	1371.32	677.471	26055	3.02
59	KAN583-6_3.tif:0002-0812-0394:c:2/4 - KAN583-6_3	0.442	824.217	364.326	14011.7	2.672
60	KAN583-6_3.tif:0003-0964-0554:c:3/4 - KAN583-6_3	0.52	1394.26	725.057	27885.1	3.203
61	KAN583-6_3.tif:0003-0421-0255:c:3/4 - KAN583-6_3	0.39	1128.96	440.322	16934.5	2.392
62	KAN583-6_3.tif:0003-0376-0342:c:3/4 - KAN583-6_3	0.416	1525.73	634.742	24411.7	2.49
63	KAN583-6_3.tif:0003-0253-0129:c:3/4 - KAN583-6_3	0.52	1493.37	776.597	29867.3	3.115
64	KAN583-6_3.tif:0003-0377-0431:c:3/4 - KAN583-6_3	0.52	959.45	498.944	19189	3.164
65	KAN583-6_3.tif:0003-0558-0260:c:3/4 - KAN583-6_3	0.364	1348.17	490.764	18874.4	2.245
66	KAN583-6_3.tif:0003-0594-0392:c:3/4 - KAN583-6_3	0.494	1313.59	648.951	24958.2	3.004
67	KAN583-6_3.tif:0003-0428-0703:c:3/4 - KAN583-6_3	0.442	964.523	426.345	16396.9	2.602
68	KAN583-6_3.tif:0003-0265-0766:c:3/4 - KAN583-6_3	0.494	1881.59	929.563	35750.3	3.036
69	KAN583-6_3.tif:0003-0363-0931:c:3/4 - KAN583-6_3	0.468	1475.71	690.676	26562.9	2.882
70	KAN583-6_3.tif:0003-0304-0643:c:3/4 - KAN583-6_3	0.494	1787.43	883.042	33961.1	2.943
71	KAN583-6_3.tif:0003-0030-0671:c:3/4 - KAN583-6_3	0.624	1806.77	1127.49	43362.5	3.785
72	KAN583-6_3.tif:0003-0789-1083:c:3/4 - KAN583-6_3	0.52	1795.7	933.823	35914.1	3.213
73	KAN583-6_3.tif:0003-0488-1003:c:3/4 - KAN583-6_3	0.442	1268.88	560.878	21570.9	2.695
74	KAN583-6_3.tif:0003-0723-1253:c:3/4 - KAN583-6_3	0.468	1233.38	577.256	22200.8	2.78
75	KAN583-6_3.tif:0003-0822-1313:c:3/4 - KAN583-6_3	0.39	1220.07	475.855	18301	2.395
						2.75772
						0.545116
1	KAN583-8_1.tif:0002-0462-0179:c:2/4 - KAN583-8_1	0.416	1117.56	464.932	17880.9	2.51
2	KAN583-8_1.tif:0002-0653-0034:c:2/4 - KAN583-8_1	0.442	907.93	401.329	15434.8	2.719
3	KAN583-8_1.tif:0002-0619-0238:c:2/4 - KAN583-8_1	0.52	664.986	345.813	13299.7	3.194
4	KAN583-8_1.tif:0002-0820-0211:c:2/4 - KAN583-8_1	0.442	658.278	290.976	11190.7	2.684
5	KAN583-8_1.tif:0002-0701-0553:c:2/4 - KAN583-8_1	0.39	1563.61	609.844	23454.1	2.391
6	KAN583-8_1.tif:0002-0822-0680:c:2/4 - KAN583-8_1	0.39	1232.63	480.756	18489.5	2.424
7	KAN583-8_1.tif:0002-0966-0887:c:2/4 - KAN583-8_1	0.52	1515.22	787.96	30304.3	3.162
8	KAN583-8_1.tif:0002-0443-0988:c:2/4 - KAN583-8_1	0.364	938.377	341.59	13137.3	2.177
9	KAN583-8_1.tif:0003-0227-1371:c:3/4 - KAN583-8_1	0.728	862.739	628.112	24156.7	4.423
10	KAN583-8_1.tif:0003-0280-1275:c:3/4 - KAN583-8_1	0.338	1201.6	406.166	15620.8	2.095
11	KAN583-8_1.tif:0002-0095-1143:c:2/4 - KAN583-8_1	0.416	757.754	315.245	12124.1	2.541
12	KAN583-8_1.tif:0002-0350-0408:c:2/4 - KAN583-8_1	0.546	624.975	341.257	13124.5	3.353
13	KAN583-8_1.tif:0002-0201-0628:c:2/4 - KAN583-8_1	0.286	637.986	182.475	7017.84	1.731
14	KAN583-8_1.tif:0002-0084-0346:c:2/4 - KAN583-8_1	0.416	489.485	203.638	7831.76	2.451
15	KAN583-8_2.tif:0002-0040-0409:c:2/4 - KAN583-8_2	0.52	907.822	472.096	18156.4	3.216
16	KAN583-8_2.tif:0002-0095-0276:c:2/4 - KAN583-8_2	0.39	634.326	247.402	9514.9	2.383
17	KAN583-8_2.tif:0002-0174-0100:c:2/4 - KAN583-8_2	0.546	581.611	317.579	12213.8	3.265
18	KAN583-8_2.tif:0002-0380-0066:c:2/4 - KAN583-8_2	0.494	602.726	297.765	11451.8	2.95
19	KAN583-8_2.tif:0002-0433-0316:c:2/4 - KAN583-8_2	0.39	991.998	386.902	14880	2.392
20	KAN583-8_2.tif:0003-0170-0648:c:3/4 - KAN583-8_2	0.598	1117.05	668.034	25692.1	3.629
21	KAN583-8_2.tif:0003-0023-0554:c:3/4 - KAN583-8_2	0.364	1423.76	518.281	19932.7	2.213
22	KAN583-8_2.tif:0003-0339-0717:c:3/4 - KAN583-8_2	0.494	1382.9	683.193	26275.1	3.034
23	KAN583-8_2.tif:0003-0433-0664:c:3/4 - KAN583-8_2	0.338	1726.73	583.67	22447.5	2.091
24	KAN583-8_2.tif:0003-0451-0640:c:3/4 - KAN583-8_2	0.338	1618.1	546.949	21035.2	2.031
25	KAN583-8_2.tif:0003-0554-0868:c:3/4 - KAN583-8_2	0.364	1366.17	497.316	19126.4	2.21
26	KAN583-8_2.tif:0003-0396-0931:c:3/4 - KAN583-8_2	0.442	2009.05	888.053	34153.8	2.615
27	KAN583-8_2.tif:0003-0303-1247:c:3/4 - KAN583-8_2	0.338	1448.01	489.457	18824.1	2.09
28	KAN583-8_2.tif:0002-0130-1308:c:2/4 - KAN583-8_2	0.312	720.826	224.911	8649.91	1.823
29	KAN583-8_2.tif:0002-0236-1348:c:2/4 - KAN583-8_2	0.39	1111.44	433.49	16671.7	2.28
30	KAN583-8_2.tif:0002-0030-1117:c:2/4 - KAN583-8_2	0.39	1184.8	462.101	17772	2.42
31	KAN583-8_2.tif:0002-0147-0919:c:2/4 - KAN583-8_2	0.494	419.047	207.022	7961.89	2.971
32	KAN583-8_2.tif:0002-0101-0892:c:2/4 - KAN583-8_2	0.286	779.222	222.871	8571.44	1.776
33	KAN583-8_2.tif:0002-0370-1199:c:2/4 - KAN583-8_2	0.416	838.596	348.877	13417.5	2.491
34	KAN583-8_2.tif:0002-0597-1373:c:2/4 - KAN583-8_2	0.286	2025.28	579.264	22278	1.647
35	KAN583-8_2.tif:0002-0778-1048:c:2/4 - KAN583-8_2	0.26	1069.59	278.11	10695.9	1.546
36	KAN583-8_2.tif:0002-0959-1133:c:2/4 - KAN583-8_2	0.39	1008.72	393.424	15130.8	2.29
37	KAN583-8_3.tif:0002-0027-0163:c:2/4 - KAN583-8_3	0.52	1179.01	613.124	23580.3	3.188
38	KAN583-8_3.tif:0002-0330-0146:c:2/4 - KAN583-8_3	0.468	484.973	226.981	8729.51	2.89
39	KAN583-8_3.tif:0002-0388-0164:c:2/4 - KAN583-8_3	0.364	637.921	232.217	8930.89	2.123
40	KAN583-8_3.tif:0002-0479-0366:c:2/4 - KAN583-8_3	0.546	1046.85	571.613	21983.8	3.416
41	KAN583-8_3.tif:0002-0666-0351:c:2/4 - KAN583-8_3	0.468	907.213	424.601	16329.8	2.803
42	KAN583-8_3.tif:0002-0707-0593:c:2/4 - KAN583-8_3	0.286	2312.84	661.513	25441.3	1.767
43	KAN583-8_3.tif:0002-0865-0606:c:2/4 - KAN583-8_3	0.416	1806.31	751.472	28901	2.579
44	KAN583-8_3.tif:0002-0705-0911:c:2/4 - KAN583-8_3	0.312	1311.2	409.12	15734.4	1.914
45	KAN583-8_3.tif:0002-0133-0533:c:2/4 - KAN583-8_3	0.364	950.6	346.039	13308.4	2.154
46	KAN583-8_3.tif:0002-0299-0622:c:2/4 - KAN583-8_3	0.39	979.12	381.88	14686.8	2.414
47	KAN583-8_3.tif:0002-0364-0733:c:2/4 - KAN583-8_3	0.468	1157.66	541.817	20837.8	2.812
48	KAN583-8_3.tif:0002-0154-0918:c:2/4 - KAN583-8_3	0.494	1461.97	722.255	27777.4	3.063
49	KAN583-8_3.tif:0002-0270-1117:c:2/4 - KAN583-8_3	0.39	1378.45	537.626	20676.7	2.342
50	KAN583-8_3.tif:0002-0179-1182:c:2/4 - KAN583-8_3	0.468	925.617	433.215	16661.1	2.792
51	KAN583-8_3.tif:0002-0023-0941:c:2/4 - KAN583-8_3	0.52	634.297	329.854	12685.9	3.083
52	KAN583-8_3.tif:0002-0678-1312:c:2/4 - KAN583-8_3	0.286	1483.52	424.312	16318.7	1.665
53	KAN583-8_3.tif:0002-0068-0690:c:2/4 - KAN583-8_3	0.494	1246.95	616.032	23692.1	3.051
						2.55234
						0.0232871
1	KAN583-10_1.tif:0002-0149-0142:c:2/4 - KAN583-10_1	0.312	1051.63	328.129	12619.6	1.828
2	KAN583-10_1.tif:0002-0258-0217:c:2/4 - KAN583-10_1	0.598	781.142	467.151	17966.3	3.578
3	KAN583-10_1.tif:0002-0414-0146:c:2/4 - KAN583-10_1	0.52	842.353	438.05	16847.1	3.183
4	KAN583-10_1.tif:0002-0465-0152:c:2/4 - KAN583-10_1	0.442	2160.38	954.944	36726.4	2.671
5	KAN583-10_1.tif:0002-0636-0207:c:2/4 - KAN583-10_1	0.52	922.484	479.721	18449.7	3.068
6	KAN583-10_1.tif:0002-0668-0145:c:2/4 - KAN583-10_1	0.494	699.384	345.517	13288.3	2.942
7	KAN583-10_1.tif:0002-0822-0128:c:2/4 - KAN583-10_1	0.338	1019.75	344.696	13256.7	2.056
8	KAN583-10_1.tif:0002-0858-0383:c:2/4 - KAN583-10_1	0.39	1962.47	765.408	29437	2.342
9	KAN583-10_1.tif:0002-0691-0463:c:2/4 - KAN583-10_1	0.442	1655.32	731.695	28140.4	2.593
10	KAN583-10_1.tif:0002-0476-0390:c:2/4 - KAN583-10_1	0.234	1331.93	311.69	11987.4	1.337
11	KAN583-10_1.tif:0002-0327-0487:c:2/4 - KAN583-10_1	0.494	1597.03	788.981	30343.6	3.032
12	KAN583-10_1.tif:0002-0140-0634:c:2/4 - KAN583-10_1	0.416	986.804	410.535	15788.9	2.518
13	KAN583-10_1.tif:0002-0060-0752:c:2/4 - KAN583-10_1	0.26	1262.87	328.365	12628.7	1.453
14	KAN583-10_1.tif:0002-0183-0936:c:2/4 - KAN583-10_1	0.468	1393.63	652.258	25085.4	2.846
15	KAN583-10_1.tif:0002-0446-0959:c:2/4 - KAN583-10_1	0.338	2102.38	710.646	27330.9	1.949
16	KAN583-10_1.tif:0002-0505-0955:c:2/4 - KAN583-10_1	0.494	2729.66	1348.53	51863.5	2.957
17	KAN583-10_1.tif:0002-0701-1042:c:2/4 - KAN583-10_1	0.572	1798.78	1028.96	39573.2	3.498
18	KAN583-10_1.tif:0002-0763-1062:c:2/4 - KAN583-10_1	0.442	2174.43	961.157	36965.4	2.695
19	KAN583-10_1.tif:0002-0513-1210:c:2/4 - KAN583-10_1	0.39	1543.18	601.875	23147.7	2.35
20	KAN583-10_1.tif:0002-0307-1214:c:2/4 - KAN583-10_1	0.364	2427.68	883.73	33987.6	2.154
21	KAN583-10_1.tif:0002-0200-1260:c:2/4 - KAN583-10_1	0.39	2941.93	1147.42	44128.9	2.356
22	KAN583-10_1.tif:0002-0245-1338:c:2/4 - KAN583-10_1	0.65	1421.64	924.121	35541	3.992
23	KAN583-10_1.tif:0002-0102-1207:c:2/4 - KAN583-10_1	0.468	1002.21	469.062	18039.7	2.889
24	KAN583-10_1.tif:0002-0249-1136:c:2/4 - KAN583-10_1	0.442	1295.6	572.691	22025.2	2.656
25	KAN583-10_1.tif:0002-0310-0719:c:2/4 - KAN583-10_1	0.312	735.31	229.43	8823.72	1.802
26	KAN583-10_2.tif:0002-0178-0144:c:2/4 - KAN583-10_2	0.442	1638.33	724.186	27851.6	2.729
27	KAN583-10_2.tif:0002-0032-0279:c:2/4 - KAN583-10_2	0.39	1374.22	535.979	20613.3	2.416
28	KAN583-10_2.tif:0002-0155-0370:c:2/4 - KAN583-10_2	0.494	2101.03	1037.97	39919.6	2.958
29	KAN583-10_2.tif:0002-0331-0098:c:2/4 - KAN583-10_2	0.598	721.166	431.283	16586.8	3.679
30	KAN583-10_2.tif:0002-0532-0040:c:2/4 - KAN583-10_2	0.39	1256.31	489.989	18844.6	2.292
31	KAN583-10_2.tif:0002-0516-0217:c:2/4 - KAN583-10_2	0.416	1413.03	587.856	22608.5	2.474
32	KAN583-10_2.tif:0002-0422-0430:c:2/4 - KAN583-10_2	0.416	1027.74	427.564	16443.8	2.551
33	KAN583-10_2.tif:0002-0367-0536:c:2/4 - KAN583-10_2	0.442	1083.65	479.003	18422.1	2.631
34	KAN583-10_2.tif:0002-0326-0638:c:2/4 - KAN583-10_2	0.494	2330.57	1151.37	44280.8	3.019
35	KAN583-10_2.tif:0002-0237-0589:c:2/4 - KAN583-10_2	0.39	1685.35	657.324	25280.2	2.283
36	KAN583-10_2.tif:0002-0137-0639:c:2/4 - KAN583-10_2	0.442	1258.4	556.249	21392.9	2.609
37	KAN583-10_2.tif:0002-0054-0667:c:2/4 - KAN583-10_2	0.676	1971.86	1333.06	51268.5	4.165
38	KAN583-10_2.tif:0002-0085-0753:c:2/4 - KAN583-10_2	0.624	2873.82	1793.37	68971.6	3.86
39	KAN583-10_2.tif:0002-0077-0976:c:2/4 - KAN583-10_2	0.52	1105.68	574.986	22113.5	3.076
40	KAN583-10_2.tif:0002-0292-1053:c:2/4 - KAN583-10_2	0.39	2791.98	1088.94	41879.7	2.424
41	KAN583-10_2.tif:0002-0515-1051:c:2/4 - KAN583-10_2	0.546	1712.21	934.924	35956.4	3.382
42	KAN583-10_2.tif:0002-0745-0409:c:2/4 - KAN583-10_2	0.39	1261.19	491.896	18917.9	2.386
43	KAN583-10_2.tif:0002-0901-0617:c:2/4 - KAN583-10_2	0.546	1164.02	635.594	24444.5	3.358
44	KAN583-10_2.tif:0002-0807-0709:c:2/4 - KAN583-10_2	0.494	1987.73	981.999	37766.9	2.979
45	KAN583-10_2.tif:0002-0848-1042:c:2/4 - KAN583-10_2	0.338	1523.08	514.83	19800	2.031
46	KAN583-10_2.tif:0002-0793-1363:c:2/4 - KAN583-10_2	0.52	1417.91	737.358	28358.2	3.104
47	KAN583-10_2.tif:0002-0556-0942:c:2/4 - KAN583-10_2	0.442	1076.4	475.798	18298.8	2.595
48	KAN583-10_2.tif:0002-0335-0938:c:2/4 - KAN583-10_2	0.52	875.056	455.057	17501.1	3.128
49	KAN583-10_2.tif:0002-0243-1375:c:2/4 - KAN583-10_2	0.39	1704.18	664.671	25562.7	2.419
50	KAN583-10_2.tif:0002-0535-1328:c:2/4 - KAN583-10_2	0.286	1902.59	544.173	20928.5	1.749
51	KAN583-10_3.tif:0002-0365-0208:c:2/4 - KAN583-10_3	0.468	1335.99	625.283	24047.9	2.788
52	KAN583-10_3.tif:0002-0201-0295:c:2/4 - KAN583-10_3	0.39	1450.13	565.584	21751.9	2.38
53	KAN583-10_3.tif:0002-0208-0520:c:2/4 - KAN583-10_3	0.468	1686.21	789.194	30351.8	2.747
54	KAN583-10_3.tif:0002-0092-0644:c:2/4 - KAN583-10_3	0.442	2832.92	1252.22	48159.6	2.6
55	KAN583-10_3.tif:0002-0010-0820:c:2/4 - KAN583-10_3	0.416	1927.77	801.999	30844.3	2.49
56	KAN583-10_3.tif:0002-0123-0820:c:2/4 - KAN583-10_3	0.494	2477.1	1223.76	47064.9	3.06
57	KAN583-10_3.tif:0002-0412-0838:c:2/4 - KAN583-10_3	0.416	1816.98	755.911	29071.7	2.581
58	KAN583-10_3.tif:0002-0467-0542:c:2/4 - KAN583-10_3	0.442	2370.2	1047.69	40293.3	2.616
59	KAN583-10_3.tif:0002-0511-0439:c:2/4 - KAN583-10_3	0.442	2262.77	1000.21	38467.1	2.704
60	KAN583-10_3.tif:0002-0594-0296:c:2/4 - KAN583-10_3	0.26	2535.32	659.224	25353.2	1.566
61	KAN583-10_3.tif:0002-0795-0543:c:2/4 - KAN583-10_3	0.39	2262.85	882.565	33942.7	2.348
62	KAN583-10_3.tif:0002-0903-0384:c:2/4 - KAN583-10_3	0.39	1475.21	575.368	22128.2	2.328
63	KAN583-10_3.tif:0002-0545-0810:c:2/4 - KAN583-10_3	0.598	1169.28	699.271	26893.4	3.723
64	KAN583-10_3.tif:0002-0568-0948:c:2/4 - KAN583-10_3	0.468	1953.27	914.183	35158.8	2.784
65	KAN583-10_3.tif:0002-0738-0999:c:2/4 - KAN583-10_3	0.468	1853.57	867.523	33364.3	2.775
66	KAN583-10_3.tif:0002-0621-1106:c:2/4 - KAN583-10_3	0.546	1242.15	678.257	26085.2	3.236
67	KAN583-10_3.tif:0002-0399-1148:c:2/4 - KAN583-10_3	0.468	1545.29	723.24	27815.2	2.829
68	KAN583-10_3.tif:0002-0298-1205:c:2/4 - KAN583-10_3	0.468	805.849	377.16	14505.3	2.862
69	KAN583-10_3.tif:0002-0833-1091:c:2/4 - KAN583-10_3	0.52	1284.85	668.164	25697.1	3.162
70	KAN583-10_3.tif:0002-0836-1127:c:2/4 - KAN583-10_3	0.572	1075.25	615.079	23655.4	3.397
71	KAN583-10_3.tif:0002-0605-1289:c:2/4 - KAN583-10_3	0.416	1583.01	658.574	25328.2	2.444
72	KAN583-10_3.tif:0002-0327-1378:c:2/4 - KAN583-10_3	0.416	1202.12	500.112	19233.9	2.544
						2.75679
						0.284501
1	KAN583-11_1.tif:0002-0155-0168:c:2/4 - KAN583-11_1	0.754	714.976	539.124	20734.3	4.533
2	KAN583-11_1.tif:0002-0615-0229:c:2/4 - KAN583-11_1	0.364	1247.51	454.12	17465.1	2.166
3	KAN583-11_1.tif:0002-0724-0184:c:2/4 - KAN583-11_1	0.442	1374.55	607.589	23367.4	2.715
4	KAN583-11_1.tif:0002-0815-0336:c:2/4 - KAN583-11_1	0.338	1959.74	662.433	25476.6	2.06
5	KAN583-11_1.tif:0002-0695-0538:c:2/4 - KAN583-11_1	0.702	2238.74	1571.69	60445.9	4.268
6	KAN583-11_1.tif:0002-0741-0664:c:2/4 - KAN583-11_1	0.728	1836.91	1337.35	51433.5	4.388
7	KAN583-11_1.tif:0002-0460-0898:c:2/4 - KAN583-11_1	0.442	2948.15	1303.16	50118.6	2.701
8	KAN583-11_1.tif:0002-0598-0860:c:2/4 - KAN583-11_1	0.546	2051.76	1120.33	43087	3.335
9	KAN583-11_1.tif:0003-0330-1035:c:3/4 - KAN583-11_1	0.468	2056.21	962.363	37011.7	2.824
10	KAN583-11_1.tif:0003-0242-0594:c:3/4 - KAN583-11_1	0.312	2119.48	661.318	25433.8	1.985
11	KAN583-11_1.tif:0003-0447-0505:c:3/4 - KAN583-11_1	0.468	1816.66	850.249	32699.9	2.824
12	KAN583-11_1.tif:0003-0783-0768:c:3/4 - KAN583-11_1	0.416	1642.72	683.414	26283.6	2.463
13	KAN583-11_1.tif:0003-0840-0737:c:3/4 - KAN583-11_1	0.286	1773.3	507.195	19506.3	1.625
14	KAN583-11_1.tif:0002-1008-0594:c:2/4 - KAN583-11_1	0.52	1607.85	836.131	32156.9	3.139
15	KAN583-11_1.tif:0002-0986-0637:c:2/4 - KAN583-11_1	0.39	1221.69	476.486	18325.3	2.35
16	KAN583-11_1.tif:0002-1000-1188:c:2/4 - KAN583-11_1	0.494	942.642	465.693	17910.2	2.936
17	KAN583-11_1.tif:0002-0905-1303:c:2/4 - KAN583-11_1	0.442	1494	660.388	25398	2.632
18	KAN583-11_1.tif:0002-0985-1381:c:2/4 - KAN583-11_1	0.624	1364.91	851.758	32758	3.758
19	KAN583-11_1.tif:0002-0969-1061:c:2/4 - KAN583-11_1	0.442	1090.45	482.01	18537.7	2.667
20	KAN583-11_1.tif:0002-0258-0910:c:2/4 - KAN583-11_1	0.572	862.029	493.11	18964.6	3.434
21	KAN583-11_1.tif:0002-0694-1285:c:2/4 - KAN583-11_1	0.546	1016.44	555.009	21345.2	3.382
22	KAN583-11_1.tif:0002-0786-1148:c:2/4 - KAN583-11_1	0.364	1920.43	699.08	26886.1	2.155
23	KAN583-11_2.tif:0002-0310-0073:c:2/4 - KAN583-11_2	0.468	788.337	368.964	14190.1	2.796
24	KAN583-11_2.tif:0002-0340-0191:c:2/4 - KAN583-11_2	0.52	1049.28	545.657	20985.5	3.21
25	KAN583-11_2.tif:0002-0507-0283:c:2/4 - KAN583-11_2	0.572	977.599	559.22	21507.2	3.536
26	KAN583-11_2.tif:0002-0365-0445:c:2/4 - KAN583-11_2	0.442	1167.04	515.864	19839.7	2.734
27	KAN583-11_2.tif:0002-0102-0572:c:2/4 - KAN583-11_2	0.572	1561.17	893.041	34345.7	3.528
28	KAN583-11_2.tif:0002-0154-0752:c:2/4 - KAN583-11_2	0.52	2179.77	1133.55	43595.3	3.093
29	KAN583-11_2.tif:0002-0277-0903:c:2/4 - KAN583-11_2	0.676	2501.33	1691	65034.6	4.147
30	KAN583-11_2.tif:0002-0455-1064:c:2/4 - KAN583-11_2	0.338	2306.82	779.751	29988.6	2.083
31	KAN583-11_2.tif:0002-0724-0873:c:2/4 - KAN583-11_2	0.572	1242.35	710.667	27331.7	3.505
32	KAN583-11_2.tif:0002-0650-1150:c:2/4 - KAN583-11_2	0.494	1367.44	675.554	25981.3	2.914
33	KAN583-11_2.tif:0002-0569-1139:c:2/4 - KAN583-11_2	0.676	950.217	642.385	24705.6	4.095
34	KAN583-11_2.tif:0002-0720-1306:c:2/4 - KAN583-11_2	0.598	1402.08	838.495	32247.9	3.627
35	KAN583-11_2.tif:0002-0852-1125:c:2/4 - KAN583-11_2	0.702	997.153	700.044	26923.1	4.319
36	KAN583-11_2.tif:0002-0901-1265:c:2/4 - KAN583-11_2	0.52	1283.51	667.468	25670.3	3.092
37	KAN583-11_2.tif:0002-0881-0732:c:2/4 - KAN583-11_2	0.65	1483.24	964.161	37080.9	3.88
38	KAN583-11_2.tif:0002-0887-0237:c:2/4 - KAN583-11_2	0.468	1652.86	773.584	29751.5	2.852
39	KAN583-11_2.tif:0002-0920-0338:c:2/4 - KAN583-11_2	0.494	1127.03	556.788	21413.6	3.129
40	KAN583-11_2.tif:0002-0561-0572:c:2/4 - KAN583-11_2	0.416	836.466	347.991	13383.5	2.464
41	KAN583-11_2.tif:0002-0633-0634:c:2/4 - KAN583-11_2	0.624	1063.42	663.616	25522.1	3.761
42	KAN583-11_2.tif:0002-0939-0082:c:2/4 - KAN583-11_2	0.728	1048.28	763.193	29351.8	4.473
43	KAN583-11_2.tif:0002-0798-0056:c:2/4 - KAN583-11_2	0.442	783.765	346.445	13324	2.723
44	KAN583-11_2.tif:0002-0022-0920:c:2/4 - KAN583-11_2	0.416	1526.88	635.222	24430.1	2.46
45	KAN583-11_3.tif:0002-0072-0187:c:2/4 - KAN583-11_3	0.624	1096.98	684.555	26327.5	3.743
46	KAN583-11_3.tif:0002-0030-0408:c:2/4 - KAN583-11_3	0.416	1371.51	570.581	21944.1	2.437
47	KAN583-11_3.tif:0002-0021-0703:c:2/4 - KAN583-11_3	0.494	2451.35	1211.04	46575.7	2.967
48	KAN583-11_3.tif:0002-0078-0861:c:2/4 - KAN583-11_3	0.468	1319.96	617.777	23759.2	2.768
49	KAN583-11_3.tif:0002-0077-0991:c:2/4 - KAN583-11_3	0.39	1799.97	702.03	26999.5	2.286
50	KAN583-11_3.tif:0002-0223-0784:c:2/4 - KAN583-11_3	0.364	1490.32	542.509	20864.5	2.162
51	KAN583-11_3.tif:0002-0362-0795:c:2/4 - KAN583-11_3	0.416	3064.53	1274.92	49032.5	2.564
52	KAN583-11_3.tif:0002-0103-1296:c:2/4 - KAN583-11_3	0.572	1527.7	873.895	33609.3	3.472
53	KAN583-11_3.tif:0002-0168-1266:c:2/4 - KAN583-11_3	0.364	1660.36	604.407	23245	2.261
54	KAN583-11_3.tif:0002-0140-1361:c:2/4 - KAN583-11_3	0.494	1797.74	888.136	34157	3.012
55	KAN583-11_3.tif:0002-0391-1161:c:2/4 - KAN583-11_3	0.416	1785.55	742.831	28568.7	2.478
56	KAN583-11_3.tif:0002-0387-1225:c:2/4 - KAN583-11_3	0.52	1469.69	764.286	29393.9	3.108
57	KAN583-11_3.tif:0002-0583-0730:c:2/4 - KAN583-11_3	0.702	1580.86	1109.83	42683.3	4.354
58	KAN583-11_3.tif:0002-0740-0950:c:2/4 - KAN583-11_3	0.468	2981.86	1395.6	53673.5	2.886
59	KAN583-11_3.tif:0002-0663-1137:c:2/4 - KAN583-11_3	0.494	1124	555.291	21356.1	2.965
60	KAN583-11_3.tif:0002-0881-1022:c:2/4 - KAN583-11_3	0.624	1409.06	879.306	33817.4	3.736
61	KAN583-11_3.tif:0002-0620-1290:c:2/4 - KAN583-11_3	0.364	1617.05	588.641	22638.7	2.123
62	KAN583-11_3.tif:0002-0227-0398:c:2/4 - KAN583-11_3	0.416	1843.02	766.741	29488.3	2.527
63	KAN583-11_3.tif:0002-0455-0328:c:2/4 - KAN583-11_3	0.338	2643.05	893.406	34359.7	2.043
64	KAN583-11_3.tif:0002-0577-0244:c:2/4 - KAN583-11_3	0.338	1597.01	539.82	20761.1	1.98
						3.00989
						0.123638
1	KAN583-13_1.tif:0002-0087-0094:c:2/4 - KAN583-13_1	0.52	982.181	510.765	19643.6	3.148
2	KAN583-13_1.tif:0002-0455-0298:c:2/4 - KAN583-13_1	0.416	1617.59	672.959	25881.5	2.428
3	KAN583-13_1.tif:0002-0540-0297:c:2/4 - KAN583-13_1	0.572	1576.16	901.617	34675.5	3.431
4	KAN583-13_1.tif:0002-0245-0493:c:2/4 - KAN583-13_1	0.39	1043.29	406.909	15649.4	2.291
5	KAN583-13_1.tif:0002-0358-0540:c:2/4 - KAN583-13_1	0.416	2546.64	1059.46	40746.2	2.577
6	KAN583-13_1.tif:0002-0065-0598:c:2/4 - KAN583-13_1	0.572	1069.88	612.006	23537.3	3.534
7	KAN583-13_1.tif:0002-0182-0711:c:2/4 - KAN583-13_1	0.338	2183.09	737.929	28380.2	2.043
8	KAN583-13_1.tif:0002-0433-0895:c:2/4 - KAN583-13_1	0.442	2996.64	1324.6	50942.9	2.737
9	KAN583-13_1.tif:0002-0603-0664:c:2/4 - KAN583-13_1	0.416	2076.28	863.784	33220.4	2.55
10	KAN583-13_1.tif:0002-0900-0299:c:2/4 - KAN583-13_1	0.494	1485.57	733.918	28225.9	2.923
11	KAN583-13_1.tif:0002-0797-0071:c:2/4 - KAN583-13_1	0.338	1126.45	380.763	14643.8	2.014
12	KAN583-13_1.tif:0002-1004-0377:c:2/4 - KAN583-13_1	0.598	1561.18	933.642	35907.1	3.678
13	KAN583-13_1.tif:0002-0936-0549:c:2/4 - KAN583-13_1	0.624	1377.94	859.89	33070.7	3.759
14	KAN583-13_1.tif:0002-0715-0781:c:2/4 - KAN583-13_1	0.572	1331.08	761.422	29283.7	3.559
15	KAN583-13_1.tif:0002-0896-0963:c:2/4 - KAN583-13_1	0.598	2220.38	1327.87	51068.8	3.561
16	KAN583-13_1.tif:0002-0612-1028:c:2/4 - KAN583-13_1	0.39	3143.08	1225.88	47146.2	2.316
17	KAN583-13_1.tif:0002-0628-1234:c:2/4 - KAN583-13_1	0.468	2112.58	988.748	38026.5	2.78
18	KAN583-13_1.tif:0002-0639-1320:c:2/4 - KAN583-13_1	0.624	905.839	565.278	21740.1	3.771
19	KAN583-13_1.tif:0002-0875-1090:c:2/4 - KAN583-13_1	0.676	801.584	541.903	20841.2	4.086
20	KAN583-13_1.tif:0002-0218-1285:c:2/4 - KAN583-13_1	0.39	2477.27	966.194	37159.1	2.273
21	KAN583-13_2.tif:0002-0061-0170:c:2/4 - KAN583-13_2	0.442	1976.69	873.75	33603.7	2.6
22	KAN583-13_2.tif:0002-0100-0202:c:2/4 - KAN583-13_2	0.39	2017.1	786.718	30256.6	2.402
23	KAN583-13_2.tif:0002-0185-0366:c:2/4 - KAN583-13_2	0.442	1650.24	729.45	28054.1	2.702
24	KAN583-13_2.tif:0002-0219-0576:c:2/4 - KAN583-13_2	0.754	2272.56	1713.61	65904.1	4.567
25	KAN583-13_2.tif:0002-0200-0630:c:2/4 - KAN583-13_2	0.494	3438.38	1698.66	65329.2	2.913
26	KAN583-13_2.tif:0002-0115-0787:c:2/4 - KAN583-13_2	0.65	1496.16	972.562	37404	3.983
27	KAN583-13_2.tif:0002-0375-0324:c:2/4 - KAN583-13_2	0.468	1313.68	614.84	23646.3	2.863
28	KAN583-13_2.tif:0002-0456-0430:c:2/4 - KAN583-13_2	0.442	1568.8	693.449	26669.5	2.632
29	KAN583-13_2.tif:0002-0396-0488:c:2/4 - KAN583-13_2	0.598	1813.63	1084.62	41713.5	3.671
30	KAN583-13_2.tif:0002-0456-0563:c:2/4 - KAN583-13_2	0.52	1262.29	656.432	25245.8	3.066
31	KAN583-13_2.tif:0002-0687-0168:c:2/4 - KAN583-13_2	0.832	1434.14	1193.28	45892.5	5.176
32	KAN583-13_2.tif:0002-0728-0357:c:2/4 - KAN583-13_2	0.442	3469.85	1533.77	58987.4	2.713
33	KAN583-13_2.tif:0002-0850-0168:c:2/4 - KAN583-13_2	0.494	1579.12	780.132	30003.3	3.044
34	KAN583-13_2.tif:0002-0940-0201:c:2/4 - KAN583-13_2	0.286	2480.39	709.435	27284.3	1.737
35	KAN583-13_2.tif:0002-0903-0556:c:2/4 - KAN583-13_2	0.702	1581.77	1110.47	42707.8	4.202
36	KAN583-13_2.tif:0002-0558-0716:c:2/4 - KAN583-13_2	0.442	2217.5	980.193	37697.5	2.621
37	KAN583-13_2.tif:0002-0537-0786:c:2/4 - KAN583-13_2	0.494	3838.2	1896.18	72925.8	2.963
38	KAN583-13_2.tif:0002-0835-0790:c:2/4 - KAN583-13_2	1.3	992.292	1290.06	49614.6	8.04
39	KAN583-13_2.tif:0002-0408-0842:c:2/4 - KAN583-13_2	0.624	1805.06	1126.43	43321.5	3.814
40	KAN583-13_2.tif:0002-0423-0972:c:2/4 - KAN583-13_2	0.546	3358.22	1833.7	70522.6	3.317
41	KAN583-13_2.tif:0002-0369-1145:c:2/4 - KAN583-13_2	0.52	2275.65	1183.41	45513	3.11
42	KAN583-13_2.tif:0002-0347-1249:c:2/4 - KAN583-13_2	0.494	1939.97	958.404	36859.5	2.974
43	KAN583-13_2.tif:0002-0394-1350:c:2/4 - KAN583-13_2	0.338	2781.32	940.141	36157.1	2.1
44	KAN583-13_2.tif:0002-0623-1264:c:2/4 - KAN583-13_2	0.442	2692.07	1189.97	45765.2	2.591
45	KAN583-13_2.tif:0002-0720-1208:c:2/4 - KAN583-13_2	0.494	2328.54	1150.37	44242.3	3.019
46	KAN583-13_2.tif:0002-0883-0997:c:2/4 - KAN583-13_2	0.52	2930.68	1524.04	58613.5	3.15
47	KAN583-13_2.tif:0002-0848-1059:c:2/4 - KAN583-13_2	0.442	2602.95	1150.57	44250.1	2.693
48	KAN583-13_3.tif:0002-0069-0492:c:2/4 - KAN583-13_3	0.416	2315.94	963.49	37055.1	2.431
49	KAN583-13_3.tif:0002-0197-0641:c:2/4 - KAN583-13_3	0.546	2148.14	1172.95	45110.8	3.286
50	KAN583-13_3.tif:0002-0229-0637:c:2/4 - KAN583-13_3	0.312	2179.59	680.072	26155	1.919
51	KAN583-13_3.tif:0002-0314-0479:c:2/4 - KAN583-13_3	0.598	946.057	565.776	21759.3	3.635
52	KAN583-13_3.tif:0002-0590-0395:c:2/4 - KAN583-13_3	0.52	1725.13	897.122	34502.6	3.155
53	KAN583-13_3.tif:0003-0735-0439:c:3/4 - KAN583-13_3	0.624	1356.91	846.76	32565.7	3.78
54	KAN583-13_3.tif:0003-0931-0502:c:3/4 - KAN583-13_3	0.39	1998.19	779.342	29972.9	2.403
55	KAN583-13_3.tif:0003-0699-0612:c:3/4 - KAN583-13_3	0.312	3783.81	1180.62	45405.7	1.888
56	KAN583-13_3.tif:0003-0529-0687:c:3/4 - KAN583-13_3	0.546	2712	1480.84	56952	3.28
57	KAN583-13_3.tif:0003-0245-0874:c:3/4 - KAN583-13_3	0.494	2048.49	1012.01	38921.3	2.997
58	KAN583-13_3.tif:0003-0342-0685:c:3/4 - KAN583-13_3	0.442	3152.78	1393.61	53597.2	2.707
59	KAN583-13_3.tif:0003-0438-0847:c:3/4 - KAN583-13_3	0.442	1997.19	882.811	33952.2	2.669
60	KAN583-13_3.tif:0003-0581-0938:c:3/4 - KAN583-13_3	0.468	3050.29	1427.62	54905.2	2.794
61	KAN583-13_3.tif:0003-0625-0948:c:3/4 - KAN583-13_3	0.468	3201.68	1498.48	57630.3	2.895
62	KAN583-13_3.tif:0003-0715-0841:c:3/4 - KAN583-13_3	0.546	2831.16	1545.91	59454.3	3.359
63	KAN583-13_3.tif:0003-0827-0810:c:3/4 - KAN583-13_3	0.416	2916.05	1213.15	46656.9	2.446
64	KAN583-13_3.tif:0003-0776-1019:c:3/4 - KAN583-13_3	0.546	1599.94	873.618	33598.7	3.266
65	KAN583-13_3.tif:0003-0890-1154:c:3/4 - KAN583-13_3	0.312	1665.79	519.758	19989.5	1.814
66	KAN583-13_3.tif:0003-0727-1314:c:3/4 - KAN583-13_3	0.598	2434.47	1455.9	55992.9	3.668
						3.06839
						0.0750627

## Sheet: IF condition
Exp. number	Cell line	Culture condition	Fixation condition	rabbit-Alexa488	mouse IgG1-Alexa568	mouse IgG2b-Alexa647	Nuclear stain	Date	Replicate
KAN583-1	RPE-BFP-Cas9 pMCB306 (pool)	serum starved for 48 hours	Fixed in 4% PFA at RT for 15 minutes.	ARL13B, Proteintech, 17711-1-AP, 1:2000	CEP170, Invitrogen, 41-3200, 1:1000	Ac-Tub, 6B-11, Santa Cruz, 1:1000	DAPI	No.3
KAN583-2	RPE-BFP-Cas9 CEP164KO (pool)	serum starved for 48 hours	Fixed in 4% PFA at RT for 15 minutes.	ARL13B, Proteintech, 17711-1-AP, 1:2000	CEP170, Invitrogen, 41-3200, 1:1000	Ac-Tub, 6B-11, Santa Cruz, 1:1000	DAPI	No.3
KAN583-3	RPE-BFP-Cas9 CEP83 KO (pool)	serum starved for 48 hours	Fixed in 4% PFA at RT for 15 minutes.	ARL13B, Proteintech, 17711-1-AP, 1:2000	CEP170, Invitrogen, 41-3200, 1:1000	Ac-Tub, 6B-11, Santa Cruz, 1:1000	DAPI	No.3
KAN583-4	RPE-BFP-Cas9 SCLT1 KO (pool)	serum starved for 48 hours	Fixed in 4% PFA at RT for 15 minutes.	ARL13B, Proteintech, 17711-1-AP, 1:2000	CEP170, Invitrogen, 41-3200, 1:1000	Ac-Tub, 6B-11, Santa Cruz, 1:1000	DAPI	No.3
KAN583-5	RPE-BFP-Cas9 FBF1 KO (pool)	serum starved for 48 hours	Fixed in 4% PFA at RT for 15 minutes.	ARL13B, Proteintech, 17711-1-AP, 1:2000	CEP170, Invitrogen, 41-3200, 1:1000	Ac-Tub, 6B-11, Santa Cruz, 1:1000	DAPI	No.3
KAN583-6	RPE-BFP-Cas9 CEP89KO (pool)	serum starved for 48 hours	Fixed in 4% PFA at RT for 15 minutes.	ARL13B, Proteintech, 17711-1-AP, 1:2000	CEP170, Invitrogen, 41-3200, 1:1000	Ac-Tub, 6B-11, Santa Cruz, 1:1000	DAPI	No.3
KAN583-7	RPE-BFP-Cas9 CCDC92 KO (pool)	serum starved for 48 hours	Fixed in 4% PFA at RT for 15 minutes.	ARL13B, Proteintech, 17711-1-AP, 1:2000	CEP170, Invitrogen, 41-3200, 1:1000	Ac-Tub, 6B-11, Santa Cruz, 1:1000	DAPI	No.3
KAN583-8	RPE-BFP-Cas9 ANKRD26 KO (pool)	serum starved for 48 hours	Fixed in 4% PFA at RT for 15 minutes.	ARL13B, Proteintech, 17711-1-AP, 1:2000	CEP170, Invitrogen, 41-3200, 1:1000	Ac-Tub, 6B-11, Santa Cruz, 1:1000	DAPI	No.3
KAN583-9	RPE-BFP-Cas9 TTBK2 KO (pool)	serum starved for 48 hours	Fixed in 4% PFA at RT for 15 minutes.	ARL13B, Proteintech, 17711-1-AP, 1:2000	CEP170, Invitrogen, 41-3200, 1:1000	Ac-Tub, 6B-11, Santa Cruz, 1:1000	DAPI	No.3
KAN583-10	RPE-BFP-Cas9 INPP5E KO (pool)	serum starved for 48 hours	Fixed in 4% PFA at RT for 15 minutes.	ARL13B, Proteintech, 17711-1-AP, 1:2000	CEP170, Invitrogen, 41-3200, 1:1000	Ac-Tub, 6B-11, Santa Cruz, 1:1000	DAPI	No.3
KAN583-11	RPE-BFP-Cas9 Kiz KO (pool)	serum starved for 48 hours	Fixed in 4% PFA at RT for 15 minutes.	ARL13B, Proteintech, 17711-1-AP, 1:2000	CEP170, Invitrogen, 41-3200, 1:1000	Ac-Tub, 6B-11, Santa Cruz, 1:1000	DAPI	No.3
KAN583-12	RPE-BFP-Cas9 sgPDE6D#1	serum starved for 48 hours	Fixed in 4% PFA at RT for 15 minutes.	ARL13B, Proteintech, 17711-1-AP, 1:2000	CEP170, Invitrogen, 41-3200, 1:1000	Ac-Tub, 6B-11, Santa Cruz, 1:1000	DAPI	No.3
KAN583-13	RPE-BFP-Cas9 sgLRRC45#1	serum starved for 48 hours	Fixed in 4% PFA at RT for 15 minutes.	ARL13B, Proteintech, 17711-1-AP, 1:2000	CEP170, Invitrogen, 41-3200, 1:1000	Ac-Tub, 6B-11, Santa Cruz, 1:1000	DAPI	No.3

## Sheet: Statistics
	Table Analyzed	Data 1		Table Analyzed	Data 1		Table Analyzed	Data 1		Table Analyzed	Data 1		Table Analyzed	Data 1		Table Analyzed	Data 1
	Column B	FBF1 KO		Column C	CEP89 KO		Column D	ANKRD26 KO		Column E	INPP5E KO		Column F	KIZ KO		Column G	sgLRRC45
	vs.	vs.		vs.	vs.		vs.	vs.		vs.	vs.		vs.	vs.		vs.	vs.
	Column A	sgSafe		Column A	sgSafe		Column A	sgSafe		Column A	sgSafe		Column A	sgSafe		Column A	sgSafe
	Unpaired t test with Welch's correction			Unpaired t test with Welch's correction			Unpaired t test with Welch's correction			Unpaired t test with Welch's correction			Unpaired t test with Welch's correction			Unpaired t test with Welch's correction
	P value	0.476		P value	0.5461		P value	0.0195		P value	0.2839		P value	0.1245		P value	0.0793
	P value summary	ns		P value summary	ns		P value summary	*		P value summary	ns		P value summary	ns		P value summary	ns
	Significantly different (P < 0.05)?	No		Significantly different (P < 0.05)?	No		Significantly different (P < 0.05)?	Yes		Significantly different (P < 0.05)?	No		Significantly different (P < 0.05)?	No		Significantly different (P < 0.05)?	No
	One- or two-tailed P value?	Two-tailed		One- or two-tailed P value?	Two-tailed		One- or two-tailed P value?	Two-tailed		One- or two-tailed P value?	Two-tailed		One- or two-tailed P value?	Two-tailed		One- or two-tailed P value?	Two-tailed
	Welch-corrected t, df	t=0.7152, df=110.3		Welch-corrected t, df	t=0.6051, df=140.2		Welch-corrected t, df	t=2.368, df=121.9		Welch-corrected t, df	t=1.076, df=137.8		Welch-corrected t, df	t=1.546, df=131.4		Welch-corrected t, df	t=1.770, df=121.0
	How big is the difference?			How big is the difference?			How big is the difference?			How big is the difference?			How big is the difference?			How big is the difference?
	Mean of column A	2.822		Mean of column A	2.822		Mean of column A	2.822		Mean of column A	2.822		Mean of column A	2.822		Mean of column A	2.822
	Mean of column B	2.726		Mean of column C	2.758		Mean of column D	2.552		Mean of column E	2.708		Mean of column F	3.01		Mean of column G	3.068
	Difference between means (B - A) ± SEM	-0.09550 ± 0.1335		Difference between means (C - A) ± SEM	-0.06409 ± 0.1059		Difference between means (D - A) ± SEM	-0.2695 ± 0.1138		Difference between means (E - A) ± SEM	-0.1134 ± 0.1054		Difference between means (F - A) ± SEM	0.1881 ± 0.1217		Difference between means (G - A) ± SEM	0.2466 ± 0.1393
	95% confidence interval	-0.3601 to 0.1691		95% confidence interval	-0.2735 to 0.1453		95% confidence interval	-0.4948 to -0.04415		95% confidence interval	-0.3218 to 0.09501		95% confidence interval	-0.05257 to 0.4287		95% confidence interval	-0.02927 to 0.5224
	R squared (eta squared)	0.004614		R squared (eta squared)	0.002605		R squared (eta squared)	0.04397		R squared (eta squared)	0.008332		R squared (eta squared)	0.01786		R squared (eta squared)	0.02523
	F test to compare variances			F test to compare variances			F test to compare variances			F test to compare variances			F test to compare variances			F test to compare variances
	F, DFn, Dfd	1.282, 55, 72		F, DFn, Dfd	1.430, 72, 74		F, DFn, Dfd	1.465, 72, 52		F, DFn, Dfd	1.527, 72, 71		F, DFn, Dfd	1.067, 63, 72		F, DFn, Dfd	1.725, 65, 72
	P value	0.3213		P value	0.1279		P value	0.1488		P value	0.0757		P value	0.7879		P value	0.0247
	P value summary	ns		P value summary	ns		P value summary	ns		P value summary	ns		P value summary	ns		P value summary	*
	Significantly different (P < 0.05)?	No		Significantly different (P < 0.05)?	No		Significantly different (P < 0.05)?	No		Significantly different (P < 0.05)?	No		Significantly different (P < 0.05)?	No		Significantly different (P < 0.05)?	Yes
	Data analyzed			Data analyzed			Data analyzed			Data analyzed			Data analyzed			Data analyzed
	Sample size, column A	73		Sample size, column A	73		Sample size, column A	73		Sample size, column A	73		Sample size, column A	73		Sample size, column A	73
	Sample size, column B	56		Sample size, column C	75		Sample size, column D	53		Sample size, column E	72		Sample size, column F	64		Sample size, column G	66
