# Supplementary material for: A hierarchical pathway for assembly of the distal appendages that organize primary cilia
Source: eLife. 2025 Jan 30;14:e85999. doi: 10.7554/eLife.85999 (PMC11984956; doi:10.7554/eLife.85999)
Supplement: Figure 5—figure supplement 1—source data 3. [file elife-85999-fig5-figsupp1-data3.xlsx]

## Sheet: KAN546
1	ARL13B_KAN546-10_1.tif:0001-0017	1.17	1249.84	662	2347	139.243	2.729	0.59	1462.41	56243	1.891	0.529	0.738	#DIV/0!
2	ARL13B_KAN546-10_1.tif:0002-0100	3.38	1933.1	527	5013	93.598	16.255	0.327	6534.27	251303	6.563	0.152	0.765	#DIV/0!
3	ARL13B_KAN546-10_1.tif:0003-0151	2.314	1179.24	525	3173	154.611	24.293	0.233	2728.92	104952	9.808	0.102	0.643	#DIV/0!
4	ARL13B_KAN546-10_1.tif:0004-0160	2.106	980.765	602	1479	182.134	25.656	0.437	2065.62	79442	3.518	0.284	0.63	#DIV/0!
5	ARL13B_KAN546-10_1.tif:0005-0216	1.014	939.897	657	1550	141.778	34.886	0.398	953.113	36656	5.752	0.174	0.69	#DIV/0!
6	ARL13B_KAN546-10_1.tif:0006-0229	0.962	1450.32	702	3264	140.277	37.081	0.567	1395.3	53662	3.377	0.296	0.771	#DIV/0!
7	ARL13B_KAN546-10_1.tif:0007-0281	1.664	1400.84	651	2681	205.521	45.344	0.419	2331.14	89654	4.582	0.218	0.692	#DIV/0!
8	ARL13B_KAN546-10_1.tif:0008-0320	3.484	1292.33	425	3215	127.732	51.545	0.156	4502.74	173172	12.718	0.079	0.576	#DIV/0!
9	ARL13B_KAN546-10_1.tif:0009-0358	2.054	1891.03	681	3676	86.121	57.914	0.436	3884.4	149391	4.846	0.206	0.731	#DIV/0!
10	ARL13B_KAN546-10_1.tif:0010-0453	1.092	1055.55	475	2316	56.568	72.889	0.265	1152.73	44333	5.996	0.167	0.549	#DIV/0!
11	ARL13B_KAN546-10_1.tif:0011-0489	1.326	1227.88	508	2562	162.589	79.008	0.531	1628.27	62622	3.764	0.266	0.85	#DIV/0!
12	ARL13B_KAN546-10_1.tif:0012-0530	1.04	1838.28	450	5175	128.444	85.483	0.497	1911.92	73531	2.643	0.378	0.741	#DIV/0!
13	ARL13B_KAN546-10_1.tif:0013-0544	0.988	1556.5	680	3369	127.472	87.983	0.487	1537.91	59147	3.671	0.272	0.784	#DIV/0!
14	ARL13B_KAN546-10_1.tif:0014-0738	0.624	1166.46	658	2310	60.415	119.083	0.39	727.914	27995	4.878	0.205	0.578	#DIV/0!
15	ARL13B_KAN546-10_1.tif:0015-0952	1.17	1071.78	662	1726	193.53	153.781	0.361	1254.06	48230	5.556	0.18	0.709	#DIV/0!
16	ARL13B_KAN546-10_1.tif:0016-1014	1.482	1080.65	461	2474	196.098	163.69	0.242	1601.62	61597	6.903	0.145	0.582	#DIV/0!
17	ARL13B_KAN546-10_1.tif:0017-1016	1.274	1072.69	655	1898	156.342	164.049	0.447	1366.69	52562	4.71	0.212	0.71	#DIV/0!
18	ARL13B_KAN546-10_2.tif:0001-0100	2.262	2019.81	581	5218	133.054	16.074	0.588	4569.07	175723	2.948	0.339	0.817	#DIV/0!
19	ARL13B_KAN546-10_2.tif:0002-0120	3.562	1541.53	369	3815	77.798	19.366	0.317	5491.24	211189	7.063	0.142	0.685	#DIV/0!
20	ARL13B_KAN546-10_2.tif:0003-0144	1.378	1042.04	266	2448	85.869	23.301	0.338	1436.01	55228	4.805	0.208	0.596	#DIV/0!
21	ARL13B_KAN546-10_2.tif:0004-0176	1.898	1325.85	379	2923	31.065	28.483	0.396	2516.61	96787	5.635	0.177	0.777	#DIV/0!
22	ARL13B_KAN546-10_2.tif:0005-0228	2.444	1254.34	603	3247	8.052	36.868	0.507	3065.79	117908	3.776	0.265	0.77	#DIV/0!
23	ARL13B_KAN546-10_2.tif:0006-0239	2.314	1014.44	275	2189	112.503	38.362	0.362	2347.55	90285	3.431	0.291	0.587	#DIV/0!
24	ARL13B_KAN546-10_2.tif:0007-0312	2.392	2004.1	656	7073	106.269	50.475	0.371	4794.09	184377	5.433	0.184	0.639	#DIV/0!
25	ARL13B_KAN546-10_2.tif:0008-0365	1.352	1743.96	662	3233	142.7	58.887	0.553	2357.98	90686	3.457	0.289	0.782	#DIV/0!
26	ARL13B_KAN546-10_2.tif:0009-0389	1.742	1315.91	654	3021	201.135	62.631	0.479	2292.45	88166	4.045	0.247	0.713	#DIV/0!
27	ARL13B_KAN546-10_2.tif:0010-0391	0.884	840.353	631	1176	178.48	63.049	0.539	742.917	28572	3.735	0.268	0.773	#DIV/0!
28	ARL13B_KAN546-10_2.tif:0011-0527	1.846	1642.14	651	4380	39.187	85.007	0.329	3031.57	116592	4.55	0.22	0.57	#DIV/0!
29	ARL13B_KAN546-10_2.tif:0012-0661	1.378	922.811	467	1740	24.332	106.539	0.216	1271.71	48909	9.461	0.106	0.596	#DIV/0!
30	ARL13B_KAN546-10_2.tif:0013-0675	0.52	714.65	591	785	180.544	108.868	0.513	371.64	14293	1.256	0.796	0.615	#DIV/0!
31	ARL13B_KAN546-10_2.tif:0014-0729	1.508	914.862	453	1799	156.418	117.601	0.246	1379.69	53062	8.221	0.122	0.586	#DIV/0!
32	ARL13B_KAN546-10_2.tif:0015-0725	1.612	1261.74	714	2589	189.958	116.945	0.251	2034.05	78228	7.488	0.134	0.544	#DIV/0!
33	ARL13B_KAN546-10_2.tif:0016-0802	0.962	1261.84	457	2160	222.257	129.268	0.597	1213.96	46688	3.202	0.312	0.881	#DIV/0!
34	ARL13B_KAN546-10_2.tif:0017-0838	1.482	1015.14	648	1541	120.826	135.149	0.597	1504.53	57863	3.183	0.314	0.82	#DIV/0!
35	ARL13B_KAN546-10_2.tif:0018-0859	1.69	1439.32	281	3545	66.885	138.669	0.376	2432.6	93556	3.349	0.299	0.596	#DIV/0!
36	ARL13B_KAN546-10_2.tif:0019-0930	0.806	1123.1	612	2353	59.728	150.064	0.264	905.271	34816	3.756	0.266	0.466	#DIV/0!
37	ARL13B_KAN546-10_2.tif:0020-0933	0.728	757.429	362	1112	204.482	150.798	0.341	551.441	21208	3.922	0.255	0.571	#DIV/0!
38	ARL13B_KAN546-10_2.tif:0021-1026	1.04	998.65	670	1638	118.245	165.628	0.226	1038.66	39946	9.669	0.103	0.597	#DIV/0!
39	ARL13B_KAN546-10_3.tif:0001-0015	2.132	1571.46	663	3451	191.587	2.334	0.347	3350.56	128860	6.046	0.165	0.698	#DIV/0!
40	ARL13B_KAN546-10_3.tif:0002-0124	3.25	1288.27	350	5634	73.127	19.95	0.25	4187.14	161034	7.995	0.125	0.585	#DIV/0!
41	ARL13B_KAN546-10_3.tif:0003-0177	3.068	1438.64	433	3449	207.264	28.783	0.275	4414.03	169760	4.293	0.233	0.5	#DIV/0!
42	ARL13B_KAN546-10_3.tif:0004-0188	2.158	1178.89	160	3419	96.088	30.388	0.368	2544.2	97848	5.625	0.178	0.703	#DIV/0!
43	ARL13B_KAN546-10_3.tif:0005-0223	1.248	839.854	190	1672	185.569	36.214	0.471	1048.2	40313	3.058	0.327	0.722	#DIV/0!
44	ARL13B_KAN546-10_3.tif:0006-0358	1.404	1058.85	425	2171	89.694	57.605	0.342	1486.72	57178	4.542	0.22	0.603	#DIV/0!
45	ARL13B_KAN546-10_3.tif:0007-0386	1.924	1383.03	223	2911	160.23	62.299	0.594	2661.1	102344	2.467	0.405	0.881	#DIV/0!
46	ARL13B_KAN546-10_3.tif:0008-0485	2.678	1515.15	255	3431	155.966	77.963	0.455	4057.83	156061	3.095	0.323	0.68	#DIV/0!
47	ARL13B_KAN546-10_3.tif:0009-0595	1.612	1209.64	291	3072	204.049	95.598	0.294	1950.07	74998	5.214	0.192	0.629	#DIV/0!
48	ARL13B_KAN546-10_3.tif:0010-0612	0.676	677.577	430	918	127.332	98.79	0.232	458.07	17617	8.403	0.119	0.571	#DIV/0!
49	ARL13B_KAN546-10_3.tif:0011-0621	0.858	754.394	345	1057	86.682	100.339	0.524	647.309	24895	2.66	0.376	0.667	#DIV/0!
50	ARL13B_KAN546-10_3.tif:0012-0702	1.794	2031.46	680	4682	213.078	113.192	0.502	3644.66	140171	4.311	0.232	0.812	#DIV/0!
51	ARL13B_KAN546-10_3.tif:0013-0825	1.898	1157.3	650	2223	185.721	133.021	0.359	2196.69	84483	3.785	0.264	0.579	#DIV/0!
52	ARL13B_KAN546-10_3.tif:0014-1017	1.17	898.022	156	1652	32.865	163.968	0.441	1050.75	40411	2.904	0.344	0.657	#DIV/0!
53	ARL13B_KAN546-10_4.tif:0001-0016	1.612	1364.45	653	3262	143.515	2.533	0.288	2199.63	84596	7.293	0.137	0.608	#DIV/0!
54	ARL13B_KAN546-10_4.tif:0002-0069	2.002	1898.45	618	3708	132.513	11.129	0.445	3800.93	146181	4.765	0.21	0.794	#DIV/0!
55	ARL13B_KAN546-10_4.tif:0003-0213	2.444	1219.47	373	2349	130.856	34.528	0.254	2980.56	114630	9.717	0.103	0.752	#DIV/0!
56	ARL13B_KAN546-10_4.tif:0004-0221	1.716	1602.71	650	3790	108.985	35.739	0.379	2750.42	105779	5.164	0.194	0.638	#DIV/0!
57	ARL13B_KAN546-10_4.tif:0005-0231	2.6	1543.97	316	3740	201.4	37.486	0.343	4014.56	154397	5.558	0.18	0.733	#DIV/0!
58	ARL13B_KAN546-10_4.tif:0006-0307	0.936	633.778	236	1166	164.574	49.634	0.311	593.252	22816	5.919	0.169	0.637	#DIV/0!
59	ARL13B_KAN546-10_4.tif:0007-0324	3.042	1676.99	222	4524	137.438	52.429	0.28	5101.72	196208	3.282	0.305	0.521	#DIV/0!
60	ARL13B_KAN546-10_4.tif:0008-0375	2.496	1543.24	194	4042	144.787	60.383	0.325	3852.16	148151	5.871	0.17	0.744	#DIV/0!
61	ARL13B_KAN546-10_4.tif:0009-0401	1.742	2027.15	653	4439	208.974	64.67	0.582	3531.51	135819	2.963	0.337	0.802	#DIV/0!
62	ARL13B_KAN546-10_4.tif:0010-0437	1.04	1375.6	720	2664	110.605	70.527	0.557	1430.71	55024	3.241	0.309	0.734	#DIV/0!
63	ARL13B_KAN546-10_4.tif:0011-0476	1.664	1130.95	650	2108	174.039	76.798	0.599	1882.02	72381	3.013	0.332	0.853	#DIV/0!
64	ARL13B_KAN546-10_4.tif:0012-0489	1.352	714.769	578	876	100.111	78.913	0.418	966.426	37168	5.024	0.199	0.727	#DIV/0!
65	ARL13B_KAN546-10_4.tif:0013-0499	0.728	878.929	654	1311	44.983	80.539	0.356	639.899	24610	5.694	0.176	0.571	#DIV/0!
66	ARL13B_KAN546-10_4.tif:0014-0509	0.572	900.636	574	1468	43.142	82.098	0.456	515.195	19814	4.425	0.226	0.667	#DIV/0!
67	ARL13B_KAN546-10_4.tif:0015-0550	0.676	954.5	575	1725	190.734	88.632	0.487	645.281	24817	3.394	0.295	0.765	#DIV/0!
68	ARL13B_KAN546-10_4.tif:0016-0562	1.196	1130.89	501	2630	126.984	90.633	0.392	1352.63	52021	5.461	0.183	0.657	#DIV/0!
69	ARL13B_KAN546-10_4.tif:0017-0565	1.144	1368.66	563	3134	77.451	91.143	0.399	1565.84	60221	4.979	0.201	0.667	#DIV/0!
70	ARL13B_KAN546-10_4.tif:0018-0614	0.884	1124.5	670	2128	23.106	99.15	0.367	994.118	38233	5.272	0.19	0.694	#DIV/0!
71	ARL13B_KAN546-10_4.tif:0019-0646	1.534	1258.47	495	2514	137.889	104.256	0.386	1930.62	74250	5.519	0.181	0.694	#DIV/0!
72	ARL13B_KAN546-10_4.tif:0020-0711	1.664	2466.97	317	5718	148.327	114.845	0.546	4105.28	157886	2.726	0.367	0.81	#DIV/0!
73	ARL13B_KAN546-10_4.tif:0021-0722	1.404	1166.13	653	2435	161.083	116.437	0.409	1637.35	62971	5.295	0.189	0.777	#DIV/0!
74	ARL13B_KAN546-10_4.tif:0022-0725	1.17	1256.64	740	2464	189.524	116.937	0.355	1470.36	56549	6.729	0.149	0.841	#DIV/0!
75	ARL13B_KAN546-10_4.tif:0023-0771	0.936	832.75	157	1368	142.527	124.252	0.571	779.501	29979	2.647	0.378	0.774	#DIV/0!
76	ARL13B_KAN546-10_4.tif:0024-0776	1.326	1543.02	390	3795	51.921	125.09	0.377	2046.17	78694	4.37	0.229	0.618	#DIV/0!
77	ARL13B_KAN546-10_4.tif:0025-0790	0.806	1287.07	655	2776	143.109	127.525	0.5	1037.44	39899	3.447	0.29	0.805	#DIV/0!
78	ARL13B_KAN546-10_4.tif:0026-0825	1.976	1651.79	446	4316	165.998	132.902	0.416	3264.13	125536	3.657	0.273	0.626	#DIV/0!
79	ARL13B_KAN546-10_4.tif:0027-0826	0.546	1146.48	700	1893	44.424	133.335	0.522	626.014	24076	3.998	0.25	0.84	#DIV/0!
80	ARL13B_KAN546-10_4.tif:0028-0837	0.832	1097.06	678	2301	41.013	135.002	0.347	912.811	35106	5.507	0.182	0.64	#DIV/0!
81	ARL13B_KAN546-10_4.tif:0029-0918	1.612	909.79	490	1700	59.556	148.015	0.302	1466.67	56407	6.495	0.154	0.571	#DIV/0!
82	ARL13B_KAN546-10_4.tif:0030-0942	1.014	857.179	652	1314	76.625	151.895	0.307	869.232	33430	6.447	0.155	0.591	#DIV/0!
83	ARL13B_KAN546-10_4.tif:0031-1021	1.04	1130.9	484	3427	131.991	164.423	0.269	1176.21	45236	5.429	0.184	0.506	#DIV/0!
84	ARL13B_KAN546-10_4.tif:0032-1025	0.702	1078.44	680	2162	95.421	165.32	0.479	757.114	29118	3.996	0.25	0.675	#DIV/0!
85	ARL13B_KAN546-10_5.tif:0001-0042	1.924	1231.95	336	2502	81.553	7.134	0.512	2370.41	91164	2.793	0.358	0.718	#DIV/0!
86	ARL13B_KAN546-10_5.tif:0002-0100	2.99	1959.82	653	4606	173.9	16.182	0.4	5860.21	225379	4.904	0.204	0.674	#DIV/0!
87	ARL13B_KAN546-10_5.tif:0003-0116	3.068	1269.99	654	2658	127.106	18.756	0.516	3896.57	149859	3.852	0.26	0.776	#DIV/0!
88	ARL13B_KAN546-10_5.tif:0004-0159	0.884	1225.47	723	2440	24.965	25.568	0.429	1083.38	41666	3.886	0.257	0.642	#DIV/0!
89	ARL13B_KAN546-10_5.tif:0005-0280	1.43	1977.87	653	6679	114.254	45.254	0.568	2828.53	108783	3.005	0.333	0.719	#DIV/0!
90	ARL13B_KAN546-10_5.tif:0006-0306	1.794	1851.09	652	5213	204.826	49.524	0.528	3321.05	127725	2.873	0.348	0.66	#DIV/0!
91	ARL13B_KAN546-10_5.tif:0007-0335	1.04	865.55	253	1733	22.773	54.22	0.553	900.226	34622	3.629	0.276	0.792	#DIV/0!
92	ARL13B_KAN546-10_5.tif:0008-0432	2.132	1288.23	156	3008	136.343	69.56	0.254	2746.68	105635	8.557	0.117	0.646	#DIV/0!
93	ARL13B_KAN546-10_5.tif:0009-0430	1.534	1350.29	578	3742	73.403	69.484	0.309	2071.47	79667	6.961	0.144	0.652	#DIV/0!
94	ARL13B_KAN546-10_5.tif:0010-0616	1.014	967.385	650	1942	33.798	99.311	0.33	980.987	37728	5.874	0.17	0.561	#DIV/0!
95	ARL13B_KAN546-10_5.tif:0011-0680	1.612	879.806	537	1826	120.168	109.632	0.273	1418.33	54548	4.501	0.222	0.523	#DIV/0!
96	ARL13B_KAN546-10_5.tif:0012-0728	1.17	1257.13	666	2437	202.525	117.374	0.59	1470.93	56571	3.355	0.298	0.811	#DIV/0!
97	ARL13B_KAN546-10_5.tif:0013-0993	1.222	1105.38	650	1937	118.5	160.164	0.502	1350.86	51953	3.871	0.258	0.671	#DIV/0!
98	ARL13B_KAN546-10_5.tif:0014-0993	0.52	1016.95	704	1501	5.499	160.162	0.476	528.846	20339	3.639	0.275	0.69	#DIV/0!
99	ARL13B_KAN546-10_5.tif:0015-1032	0.754	1017.21	694	1813	175.22	166.535	0.463	767.02	29499	4.064	0.246	0.667	#DIV/0!
100	ARL13B_KAN546-10_6.tif:0001-0131	1.924	1269.16	460	2776	193.921	21.028	0.257	2442.01	93918	5.332	0.188	0.497	#DIV/0!
101	ARL13B_KAN546-10_6.tif:0002-0147	2.21	1460.94	393	4779	178.423	23.817	0.307	3228.87	124180	5.225	0.191	0.556	#DIV/0!
102	ARL13B_KAN546-10_6.tif:0003-0166	0.702	893.593	522	1210	206.385	26.723	0.571	627.34	24127	2.613	0.383	0.72	#DIV/0!
103	ARL13B_KAN546-10_6.tif:0004-0173	0.598	1076.91	468	2045	207.89	27.942	0.521	644.033	24769	2.773	0.361	0.697	#DIV/0!
104	ARL13B_KAN546-10_6.tif:0005-0240	1.846	1163.35	287	2686	60.443	38.615	0.316	2147.68	82598	5.682	0.176	0.592	#DIV/0!
105	ARL13B_KAN546-10_6.tif:0006-0239	1.014	1160.38	684	1853	215.358	38.59	0.574	1176.7	45255	3.048	0.328	0.78	#DIV/0!
106	ARL13B_KAN546-10_6.tif:0007-0276	1.82	1531.17	357	4549	153.664	44.618	0.419	2786.9	107182	4.483	0.223	0.7	#DIV/0!
107	ARL13B_KAN546-10_6.tif:0008-0318	0.884	1114.56	653	2366	174.515	51.353	0.577	985.329	37895	2.729	0.366	0.731	#DIV/0!
108	ARL13B_KAN546-10_6.tif:0009-0333	1.924	1336.81	413	3351	60.408	53.72	0.411	2572.18	98924	4.661	0.215	0.763	#DIV/0!
109	ARL13B_KAN546-10_6.tif:0010-0347	2.782	1103.28	647	2607	123.021	55.831	0.397	3069.51	118051	4.916	0.203	0.746	#DIV/0!
110	ARL13B_KAN546-10_6.tif:0011-0374	2.002	1068.73	33	2165	148.565	60.317	0.57	2139.72	82292	2.801	0.357	0.794	#DIV/0!
111	ARL13B_KAN546-10_6.tif:0012-0473	1.378	1041.57	81	2351	16.2	76.34	0.563	1435.36	55203	2.857	0.35	0.785	#DIV/0!
112	ARL13B_KAN546-10_6.tif:0013-0523	1.898	1828.77	347	4786	122.757	84.45	0.531	3471.21	133500	3.659	0.273	0.901	#DIV/0!
113	ARL13B_KAN546-10_6.tif:0014-0583	1.014	1302.33	696	2305	44.751	94.069	0.531	1320.65	50791	2.432	0.411	0.65	#DIV/0!
114	ARL13B_KAN546-10_6.tif:0015-0606	1.794	2072.91	657	3931	78.392	97.894	0.547	3719.03	143031	3.324	0.301	0.798	#DIV/0!
115	ARL13B_KAN546-10_6.tif:0016-0716	0.65	973.48	656	1457	8.124	115.465	0.271	632.8	24337	8.056	0.124	0.588	#DIV/0!
116	ARL13B_KAN546-10_6.tif:0017-0825	1.222	1282.68	662	2224	167.722	133.15	0.37	1567.53	60286	5.63	0.178	0.681	#DIV/0!
117	ARL13B_KAN546-10_6.tif:0018-0839	0.936	965.111	382	1787	83.886	135.387	0.346	903.398	34744	5.908	0.169	0.621	#DIV/0!
118	ARL13B_KAN546-10_6.tif:0019-0922	0.572	1105.09	664	1765	120.703	148.636	0.552	632.15	24312	3.717	0.269	0.746	#DIV/0!
										79551.6				#DIV/0!

## Sheet: KAN565
	Label	Area	Mean	Min	Max	X	Y	Circ	IntDen	RawIntDen	AR	Round	Solidity						Label	Area	Mean	Min	Max	X	Y	Circ	IntDen	RawIntDen	AR	Round	Solidity
409	ARL13B_KAN565-1_1.tif:0001-0017	4.42	772.835	321	1337	140.354	2.98	0.409	3416.14	131382	3.926	0.255	0.704	1.09049
410	ARL13B_KAN565-1_1.tif:0002-0081	7.306	805.085	0	2021	38.971	13.475	0.296	5882.31	226229	3.633	0.275	0.601	1.87773
411	ARL13B_KAN565-1_1.tif:0003-0132	3.432	652.121	127	1507	48.52	21.239	0.39	2238.22	86080	5.205	0.192	0.774	0.714474
412	ARL13B_KAN565-1_1.tif:0004-0238	3.926	995.219	186	3493	92.277	38.296	0.475	3907.46	150278	4.747	0.211	0.837	1.24732
413	ARL13B_KAN565-1_1.tif:0005-0279	1.196	513.391	230	997	14.663	45.066	0.473	614.053	23616	3.476	0.288	0.767	0.196015
414	ARL13B_KAN565-1_1.tif:0006-0288	4.082	1042.06	352	2401	166.274	46.35	0.393	4253.93	163603	5.276	0.19	0.787	1.35792
415	ARL13B_KAN565-1_1.tif:0007-0307	2.886	831.126	163	2843	181.118	49.804	0.415	2398.77	92255	4.468	0.224	0.74	0.765727
416	ARL13B_KAN565-1_1.tif:0008-0388	2.002	635.701	355	1201	2.311	62.721	0.401	1272.75	48949	4.614	0.217	0.691	0.406282
417	ARL13B_KAN565-1_1.tif:0009-0436	3.328	823.359	222	2283	66.737	70.367	0.432	2740.3	105390	3.921	0.255	0.717	0.874749
418	ARL13B_KAN565-1_1.tif:0010-0476	1.664	855.359	69	2086	163.558	76.44	0.357	1423.4	54743	3.068	0.326	0.561	0.454373
419	ARL13B_KAN565-1_1.tif:0011-0483	2.574	886.273	352	2102	173.048	78.122	0.494	2281.4	87741	3.608	0.277	0.728	0.72826
420	ARL13B_KAN565-1_1.tif:0012-0516	1.768	901.941	322	2523	203.462	83.376	0.434	1594.73	61332	3.972	0.252	0.683	0.509062
421	ARL13B_KAN565-1_1.tif:0013-0639	3.718	795.077	233	2044	117.339	103.267	0.308	2956.27	113696	5.051	0.198	0.598	0.94369
422	ARL13B_KAN565-1_1.tif:0014-0727	1.612	1065.23	354	3012	1.756	117.169	0.472	1717.25	66044	4.099	0.244	0.765	0.548173
423	ARL13B_KAN565-1_1.tif:0015-0776	2.86	775.509	262	1543	167.866	125.255	0.453	2218.09	85306	3.861	0.259	0.83	0.708049
424	ARL13B_KAN565-1_1.tif:0016-0807	3.614	1157.07	149	3473	95.789	130.272	0.387	4181.91	160833	5.259	0.19	0.788	1.33493
425	ARL13B_KAN565-1_1.tif:0017-0817	2.678	1247.04	310	3303	181.041	131.643	0.489	3339.77	128445	3.631	0.275	0.811	1.06611
426	ARL13B_KAN565-1_1.tif:0018-0812	3.146	673.455	193	2490	32.085	130.936	0.29	2118.82	81488	7.228	0.138	0.783	0.67636
427	ARL13B_KAN565-1_1.tif:0019-0822	2.912	843.732	119	1957	145.757	132.651	0.301	2457.1	94498	5.482	0.182	0.548	0.784344
428	ARL13B_KAN565-1_1.tif:0020-0829	2.6	837.5	31	2561	79.741	133.546	0.307	2177.63	83750	3.247	0.308	0.51	0.695134
429	ARL13B_KAN565-1_1.tif:0021-0981	3.224	1306.37	177	3763	59.011	158.043	0.357	4211.99	161990	5.613	0.178	0.81	1.34454
430	ARL13B_KAN565-1_1.tif:0022-0997	2.028	1113.1	355	2555	88.855	160.7	0.462	2257.51	86822	4.143	0.241	0.726	0.720632
431	ARL13B_KAN565-1_1.tif:0023-1026	3.12	854.625	134	2917	193.918	165.218	0.227	2666.59	102555	7.384	0.135	0.55	0.851218
432	ARL13B_KAN565-1_2.tif:0001-0052	3.614	651.921	332	1249	149.506	8.474	0.406	2356.18	90617	2.719	0.368	0.73	0.752131
433	ARL13B_KAN565-1_2.tif:0002-0176	3.874	1543.87	76	4008	148.697	28.785	0.47	5981.32	230037	2.181	0.458	0.658	1.90933
434	ARL13B_KAN565-1_2.tif:0003-0180	2.704	1074.72	55	5320	153.315	29.146	0.444	2906.22	111771	2.892	0.346	0.703	0.927712
435	ARL13B_KAN565-1_2.tif:0004-0318	2.08	871.312	18	3287	117.93	51.527	0.415	1812.44	69705	3.519	0.284	0.632	0.578559
436	ARL13B_KAN565-1_2.tif:0005-0348	0.598	400.522	353	502	27.458	56.104	0.496	239.526	9212	2.713	0.369	0.697	0.0764606
437	ARL13B_KAN565-1_2.tif:0006-0411	3.328	551.852	291	872	128.55	66.396	0.426	1836.67	70637	4.818	0.208	0.788	0.586295
438	ARL13B_KAN565-1_2.tif:0007-0443	2.964	798.158	346	2895	197.453	71.502	0.365	2365.88	90990	5.148	0.194	0.646	0.755227
439	ARL13B_KAN565-1_2.tif:0008-0538	2.964	1244.42	139	4252	177.393	86.622	0.454	3688.69	141864	3.482	0.287	0.679	1.17749
440	ARL13B_KAN565-1_2.tif:0009-0575	4.368	800.905	354	2410	127.529	92.974	0.413	3498.56	134552	3.921	0.255	0.712	1.1168
441	ARL13B_KAN565-1_2.tif:0010-0623	1.534	842.339	352	1528	38.037	100.537	0.465	1292.23	49698	4.437	0.225	0.72	0.412499
442	ARL13B_KAN565-1_2.tif:0011-0655	2.158	771.988	239	1887	168.4	105.478	0.352	1666.05	64075	5.435	0.184	0.648	0.53183
443	ARL13B_KAN565-1_2.tif:0012-0860	2.262	689.069	351	1224	182.808	138.752	0.33	1558.77	59949	4.973	0.201	0.621	0.497583
444	ARL13B_KAN565-1_2.tif:0013-1003	1.664	449.406	210	772	163.933	161.472	0.234	747.857	28762	5.271	0.19	0.536	0.238728
445	ARL13B_KAN565-1_3.tif:0001-0056	3.016	725.836	251	1703	186.406	9.309	0.371	2189.25	84197	4.211	0.237	0.619	0.698845
446	ARL13B_KAN565-1_3.tif:0002-0091	4.576	894.909	312	2036	122.619	14.428	0.368	4095.35	157504	3.729	0.268	0.682	1.3073
447	ARL13B_KAN565-1_3.tif:0003-0130	2.054	784.342	360	1795	155.144	20.886	0.465	1611.13	61963	4.663	0.214	0.738	0.5143
448	ARL13B_KAN565-1_3.tif:0004-0140	5.096	1216.71	288	4014	132.729	22.744	0.43	6200.72	238475	4.594	0.218	0.792	1.97937
449	ARL13B_KAN565-1_3.tif:0005-0248	6.682	1068.45	196	2593	113.231	39.665	0.347	7139.8	274591	4.706	0.212	0.688	2.27914
450	ARL13B_KAN565-1_3.tif:0006-0261	1.404	536.278	212	1244	50.017	42.164	0.344	752.979	28959	4.062	0.246	0.647	0.240363
451	ARL13B_KAN565-1_3.tif:0007-0342	3.016	1015.21	330	2679	80.611	55.116	0.336	3062.05	117764	6.152	0.163	0.707	0.977454
452	ARL13B_KAN565-1_3.tif:0008-0362	4.654	993.777	351	2436	52.004	58.304	0.413	4625.31	177886	4.766	0.21	0.799	1.47647
453	ARL13B_KAN565-1_3.tif:0009-0435	3.432	899.386	305	2121	67.62	70.125	0.404	3086.88	118719	5.323	0.188	0.759	0.985381
454	ARL13B_KAN565-1_3.tif:0010-0456	1.196	546.174	153	1095	183.306	73.639	0.295	653.263	25124	5.008	0.2	0.626	0.208532
455	ARL13B_KAN565-1_3.tif:0011-0514	5.59	1010.54	272	2405	157.128	82.918	0.304	5649.26	217266	7.601	0.132	0.785	1.80333
456	ARL13B_KAN565-1_3.tif:0012-0591	3.406	1403.56	148	5477	163.529	95.2	0.321	4780.8	183866	5.847	0.171	0.667	1.52611
457	ARL13B_KAN565-1_3.tif:0013-0631	2.34	612.278	291	1264	5.633	102.012	0.268	1432.82	55105	7.367	0.136	0.606	0.457378
458	ARL13B_KAN565-1_3.tif:0014-0713	0.988	428.026	216	801	112.349	115.018	0.418	422.915	16265	2.275	0.439	0.623	0.135001
459	ARL13B_KAN565-1_3.tif:0015-0758	3.38	1054.02	4	4418	139.159	122.259	0.333	3562.81	137023	6.29	0.159	0.69	1.13731
460	ARL13B_KAN565-1_3.tif:0016-0808	2.106	895.963	360	1919	9.174	130.343	0.356	1887.01	72573	6.066	0.165	0.747	0.602364
461	ARL13B_KAN565-1_3.tif:0017-0864	2.002	914.117	363	2204	78.488	139.311	0.347	1830.17	70387	6	0.167	0.664	0.58422
462	ARL13B_KAN565-1_3.tif:0018-0899	3.146	815.901	219	2452	211.866	144.474	0.259	2566.98	98724	5.187	0.193	0.563	0.81942
463	ARL13B_KAN565-1_3.tif:0019-0898	0.78	397.133	164	504	51.912	144.647	0.415	309.783	11914	3.534	0.283	0.723	0.0988875
464	ARL13B_KAN565-1_3.tif:0020-0954	2.184	1030.37	352	2186	2.238	153.961	0.325	2250.46	86551	6.783	0.147	0.691	0.718383
465	ARL13B_KAN565-1_3.tif:0021-1010	2.86	1093.4	193	2842	142.453	163.037	0.277	3127.31	120274	6.777	0.148	0.636	0.998288
466	ARL13B_KAN565-1_4.tif:0001-0039	0.91	566.914	213	957	26.028	6.259	0.495	515.923	19842	4.022	0.249	0.714	0.164691
467	ARL13B_KAN565-1_4.tif:0002-0060	4.628	1503.36	0	6093	115.835	9.575	0.465	6957.97	267598	2.257	0.443	0.672	2.22109
468	ARL13B_KAN565-1_4.tif:0003-0089	4.16	932.181	271	2741	71.107	14.342	0.193	3878.11	149149	8.91	0.112	0.562	1.23795
469	ARL13B_KAN565-1_4.tif:0004-0101	2.678	1002.92	184	2560	51.007	16.4	0.362	2685.99	103301	4.629	0.216	0.678	0.85741
470	ARL13B_KAN565-1_4.tif:0005-0129	3.796	1928.29	48	5969	82.593	20.69	0.491	7320.22	281530	3.008	0.332	0.755	2.33673
471	ARL13B_KAN565-1_4.tif:0006-0126	3.536	1218.29	266	3195	111.583	20.181	0.312	4308.15	165688	5.862	0.171	0.768	1.37523
472	ARL13B_KAN565-1_4.tif:0007-0178	3.562	826.569	181	2361	197.519	28.796	0.345	2944.42	113240	3.93	0.254	0.609	0.939905
473	ARL13B_KAN565-1_4.tif:0008-0209	4.394	1511.07	269	5431	54.336	33.789	0.273	6640.02	255370	4.557	0.219	0.593	2.1196
474	ARL13B_KAN565-1_4.tif:0009-0232	4.056	1498.48	173	4336	116.563	37.358	0.306	6078.2	233763	5.911	0.169	0.665	1.94026
475	ARL13B_KAN565-1_4.tif:0010-0250	2.132	646.268	220	1381	8.924	40.377	0.272	1377.93	52994	8.252	0.121	0.726	0.439856
476	ARL13B_KAN565-1_4.tif:0011-0341	3.224	1339.19	354	3861	208.395	55.001	0.391	4317.82	166060	5.557	0.18	0.691	1.37832
477	ARL13B_KAN565-1_4.tif:0012-0375	3.016	1216.42	191	3971	20.17	60.63	0.454	3668.95	141105	4.679	0.214	0.756	1.17119
478	ARL13B_KAN565-1_4.tif:0013-0401	5.694	1411.52	0	6488	107.347	64.616	0.262	8037.68	309123	5.632	0.178	0.561	2.56576
479	ARL13B_KAN565-1_4.tif:0014-0416	3.458	793.639	0	2156	131.15	66.974	0.218	2744.57	105554	8.511	0.117	0.555	0.87611
480	ARL13B_KAN565-1_4.tif:0015-0448	3.068	777.076	159	2175	214.282	72.345	0.185	2384.21	91695	9.108	0.11	0.584	0.761079
481	ARL13B_KAN565-1_4.tif:0016-0546	3.068	576.966	301	1220	176.6	88.137	0.378	1770.24	68082	5.152	0.194	0.819	0.565088
482	ARL13B_KAN565-1_4.tif:0017-0631	3.64	2589.43	139	9256	158.402	101.57	0.471	9426.09	362520	3.414	0.293	0.729	3.00896
483	ARL13B_KAN565-1_4.tif:0018-0640	2.158	1111.67	182	2939	150.21	103.37	0.343	2399.14	92269	5.376	0.186	0.697	0.765843
484	ARL13B_KAN565-1_4.tif:0019-0766	2.652	658.676	350	1507	5.794	123.65	0.156	1746.91	67185	8.95	0.112	0.495	0.557643
485	ARL13B_KAN565-1_4.tif:0020-0785	4.212	1551.85	328	5794	120.916	126.814	0.278	6536.79	251400	7.724	0.129	0.748	2.08665
486	ARL13B_KAN565-1_4.tif:0021-0816	2.6	657.43	67	1527	14.332	131.485	0.299	1709.42	65743	3.13	0.32	0.528	0.545674
487	ARL13B_KAN565-1_4.tif:0022-0844	4.368	1360.21	155	4120	128.711	135.928	0.368	5941.75	228515	4.007	0.25	0.6	1.8967
488	ARL13B_KAN565-1_4.tif:0023-0932	2.314	853.573	245	2666	154.949	150.047	0.296	1975.29	75968	4.484	0.223	0.614	0.630543
489	ARL13B_KAN565-1_4.tif:0024-0933	1.3	609.52	347	1066	72.692	150.304	0.334	792.424	30476	6.094	0.164	0.654	0.252954
490	ARL13B_KAN565-1_5.tif:0001-0021	4.16	636.25	350	1135	48.318	3.461	0.359	2646.96	101800	6.21	0.161	0.731	0.844951
491	ARL13B_KAN565-1_5.tif:0002-0038	3.562	1213.4	356	2683	161.546	6.207	0.496	4322.4	166236	4.36	0.229	0.848	1.37978
492	ARL13B_KAN565-1_5.tif:0003-0092	4.472	1017.31	247	3058	53.497	14.989	0.343	4549.68	174977	5.73	0.175	0.74	1.45233
493	ARL13B_KAN565-1_5.tif:0004-0112	3.172	1319.38	174	4655	74.252	17.995	0.409	4185.32	160964	5.263	0.19	0.841	1.33602
494	ARL13B_KAN565-1_5.tif:0005-0193	0.988	442.289	350	575	72.473	31.24	0.465	437.008	16807	3.664	0.273	0.738	0.1395
495	ARL13B_KAN565-1_5.tif:0006-0238	4.108	1179.56	283	3741	107.225	38.186	0.407	4845.91	186370	3.97	0.252	0.699	1.54689
496	ARL13B_KAN565-1_5.tif:0007-0282	3.432	653.462	339	2011	66.743	45.425	0.422	2242.82	86257	4.475	0.223	0.721	0.715943
497	ARL13B_KAN565-1_5.tif:0008-0408	0.884	408.235	242	564	25.534	66.032	0.385	360.902	13880	4.416	0.226	0.8	0.115206
498	ARL13B_KAN565-1_5.tif:0009-0425	4.524	1180.57	72	3693	103.152	68.535	0.453	5341.22	205419	4.68	0.214	0.806	1.705
499	ARL13B_KAN565-1_5.tif:0010-0431	1.846	502.099	206	1161	76.933	69.395	0.453	926.93	35649	3.7	0.27	0.821	0.295891
500	ARL13B_KAN565-1_5.tif:0011-0465	5.148	1276.83	158	3332	50.365	74.976	0.291	6573.51	252812	6.139	0.163	0.735	2.09837
501	ARL13B_KAN565-1_5.tif:0012-0476	1.95	813.12	359	1618	19.618	76.861	0.313	1585.68	60984	5.689	0.176	0.711	0.506174
502	ARL13B_KAN565-1_5.tif:0013-0497	4.498	782.757	137	1599	171.425	80.278	0.458	3521.05	135417	3.535	0.283	0.771	1.12398
503	ARL13B_KAN565-1_5.tif:0014-0499	1.3	554.7	246	1068	107.573	80.451	0.381	721.153	27735	4.225	0.237	0.621	0.230204
504	ARL13B_KAN565-1_5.tif:0015-0525	4.186	1682	124	4993	60.491	84.68	0.363	7041.28	270802	5.273	0.19	0.739	2.24769
505	ARL13B_KAN565-1_5.tif:0016-0523	1.17	625.6	53	1762	109.713	84.267	0.403	731.996	28152	3.133	0.319	0.612	0.233665
506	ARL13B_KAN565-1_5.tif:0017-0530	2.314	543.809	75	1236	10.698	85.804	0.196	1258.45	48399	5.179	0.193	0.397	0.401717
507	ARL13B_KAN565-1_5.tif:0018-0607	2.626	1255.79	353	3030	190.59	97.745	0.374	3297.91	126835	3.637	0.275	0.582	1.05274
508	ARL13B_KAN565-1_5.tif:0019-0617	2.756	1331.36	359	3818	218.083	99.508	0.406	3669.45	141124	4.829	0.207	0.704	1.17135
509	ARL13B_KAN565-1_5.tif:0020-0749	2.08	952.337	317	2573	222.452	120.778	0.392	1980.98	76187	5.03	0.199	0.724	0.632361
510	ARL13B_KAN565-1_5.tif:0021-0774	3.978	1779.43	358	4308	51.687	124.679	0.296	7079	272253	5.942	0.168	0.637	2.25973
511	ARL13B_KAN565-1_5.tif:0022-0787	2.99	1250.53	117	2802	136.916	126.71	0.363	3739.31	143811	4.839	0.207	0.693	1.19365
512	ARL13B_KAN565-1_5.tif:0023-0888	3.458	838.023	151	2359	60.412	142.926	0.171	2898.06	111457	5.687	0.176	0.403	0.925106
513	ARL13B_KAN565-1_5.tif:0024-0886	2.522	1387.6	364	4525	118.776	143.053	0.428	3499.73	134597	4.431	0.226	0.698	1.11717
514	ARL13B_KAN565-1_5.tif:0025-0925	1.69	888.892	352	1882	142.621	149.373	0.253	1502.32	57778	6.165	0.162	0.594	0.479564
515	ARL13B_KAN565-1_5.tif:0026-0969	2.184	786.583	178	1663	192.306	156.322	0.3	1718	66073	6.169	0.162	0.609	0.548413
516	ARL13B_KAN565-1_5.tif:0027-0997	2.366	1139.93	350	2849	44.274	160.842	0.349	2697.25	103734	5.985	0.167	0.667	0.861004
517	ARL13B_KAN565-1_5.tif:0028-1021	2.184	664.095	297	1186	3.187	164.819	0.206	1450.47	55784	10.145	0.099	0.672	0.463013
518	ARL13B_KAN565-1_6.tif:0001-0033	2.158	966	371	1972	5.349	5.351	0.368	2084.75	80178	6.412	0.156	0.695	0.665486
519	ARL13B_KAN565-1_6.tif:0002-0081	2.158	800.434	277	2038	192.809	13.28	0.31	1727.44	66436	4.068	0.246	0.585	0.551426
520	ARL13B_KAN565-1_6.tif:0003-0097	3.302	927.575	250	2072	132.598	15.3	0.308	3063.04	117802	3.665	0.273	0.515	0.97777
521	ARL13B_KAN565-1_6.tif:0004-0238	3.822	724.98	314	1677	151.302	38.594	0.44	2771.04	106572	3.734	0.268	0.784	0.88456
522	ARL13B_KAN565-1_6.tif:0005-0387	3.848	794.041	197	1934	68.296	63.053	0.335	3055.65	117518	2.762	0.362	0.599	0.975413
523	ARL13B_KAN565-1_6.tif:0006-0396	3.302	1886.09	358	6210	191.883	64.014	0.406	6228.26	239534	4.986	0.201	0.711	1.98816
524	ARL13B_KAN565-1_6.tif:0007-0470	4.914	1162.4	220	2988	178.138	75.809	0.294	5712.36	219693	4.745	0.211	0.681	1.82348
525	ARL13B_KAN565-1_6.tif:0008-0631	4.498	797.04	191	2102	147.087	101.614	0.346	3585.3	137888	5.197	0.192	0.824	1.14449
526	ARL13B_KAN565-1_6.tif:0009-0645	3.172	1462.82	242	6232	98.5	104.091	0.43	4640.34	178464	4.247	0.235	0.746	1.48127
527	ARL13B_KAN565-1_6.tif:0010-0804	3.796	610.315	329	1112	124.958	129.815	0.474	2316.9	89106	3.635	0.275	0.755	0.73959
528	ARL13B_KAN565-1_6.tif:0011-0820	1.794	1096.59	359	2393	27.505	132.343	0.413	1967.41	75665	5.441	0.184	0.817	0.628028
529	ARL13B_KAN565-1_6.tif:0012-0852	5.07	580.8	253	1155	94.385	137.418	0.31	2944.83	113256	6.648	0.15	0.814	0.940038
530	ARL13B_KAN565-1_6.tif:0013-0896	3.094	492.034	216	945	171.26	144.592	0.329	1522.44	58552	5.228	0.191	0.735	0.485988
531	ARL13B_KAN565-1_6.tif:0014-0905	4.03	1086.39	352	2399	103.41	146.133	0.422	4378.43	168391	4.465	0.224	0.771	1.39766
532	ARL13B_KAN565-1_6.tif:0015-0937	5.512	1415.55	233	3899	86.131	151.174	0.392	7802.97	300096	4.704	0.213	0.791	2.49083
533	ARL13B_KAN565-1_6.tif:0016-0938	3.12	919.6	302	2183	51.384	151.192	0.402	2869.32	110352	4.797	0.208	0.772	0.915934
534	ARL13B_KAN565-1_6.tif:0017-0954	2.574	652.566	268	1659	221.221	153.929	0.213	1679.81	64604	7.82	0.128	0.521	0.53622
535	ARL13B_KAN565-1_6.tif:0018-0984	3.666	1080.94	352	2631	185.708	158.505	0.467	3962.95	152412	3.735	0.268	0.736	1.26504
536	ARL13B_KAN565-1_6.tif:0019-1003	3.692	1130.09	351	2931	156.811	161.588	0.378	4172.52	160472	3.89	0.257	0.62	1.33194
										120480				1
540	ARL13B_KAN565-5_1.tif:0001-0141	4.316	801.09	129	1939	100.22	22.655	0.354	3457.71	132981	4.113	0.243	0.663	1.10376
541	ARL13B_KAN565-5_1.tif:0002-0197	4.186	894.323	203	4172	69.644	32.307	0.416	3743.86	143986	1.779	0.562	0.652	1.1951
542	ARL13B_KAN565-5_1.tif:0003-0293	3.952	826.257	358	1825	133.086	47.063	0.453	3265.56	125591	4.43	0.226	0.738	1.04242
543	ARL13B_KAN565-5_1.tif:0004-0308	2.158	754.614	361	2025	202.457	49.705	0.405	1628.56	62633	5.468	0.183	0.738	0.519861
544	ARL13B_KAN565-5_1.tif:0005-0354	1.794	492.42	353	898	63.765	57.025	0.242	883.455	33977	7.786	0.128	0.556	0.282013
545	ARL13B_KAN565-5_1.tif:0006-0403	2.782	518.449	0	1121	178.946	64.933	0.323	1442.41	55474	3.516	0.284	0.526	0.46044
546	ARL13B_KAN565-5_1.tif:0007-0496	5.616	801.856	355	1768	79.705	79.943	0.274	4503.5	173201	7.46	0.134	0.662	1.43759
547	ARL13B_KAN565-5_1.tif:0008-0572	3.51	483.244	268	770	199.775	92.016	0.451	1696.29	65238	3.135	0.319	0.744	0.541483
548	ARL13B_KAN565-5_1.tif:0009-0764	3.328	810.617	364	1707	181.62	123.383	0.235	2697.9	103759	9.327	0.107	0.643	0.861211
549	ARL13B_KAN565-5_1.tif:0010-0828	3.042	1306.67	357	3139	9.94	133.545	0.324	3975.14	152881	6.487	0.154	0.729	1.26893
550	ARL13B_KAN565-5_1.tif:0011-0998	2.418	627.871	325	1320	113.977	161.067	0.393	1518.28	58392	4.452	0.225	0.684	0.48466
551	ARL13B_KAN565-5_2.tif:0001-0177	4.42	1202.19	0	3727	150.463	28.482	0.471	5314.02	204373	3.93	0.254	0.762	1.69632
552	ARL13B_KAN565-5_2.tif:0002-0207	3.25	564.68	202	1115	202.336	33.498	0.251	1835.32	70585	4.816	0.208	0.517	0.585863
553	ARL13B_KAN565-5_2.tif:0003-0360	1.56	644.15	250	1348	72.377	57.908	0.237	1004.93	38649	3.778	0.265	0.449	0.320791
554	ARL13B_KAN565-5_2.tif:0004-0410	2.106	453.753	286	743	11.784	66.175	0.306	955.662	36754	5.161	0.194	0.678	0.305062
555	ARL13B_KAN565-5_2.tif:0005-0454	5.954	698.402	189	1379	108.287	73.468	0.475	4158.53	159934	3.293	0.304	0.736	1.32747
556	ARL13B_KAN565-5_2.tif:0006-0510	5.226	950.567	36	2810	163.411	82.256	0.41	4967.96	191064	4.389	0.228	0.764	1.58585
557	ARL13B_KAN565-5_2.tif:0007-0535	1.846	974.366	347	2756	124.52	86.422	0.338	1798.79	69180	5.32	0.188	0.676	0.574202
558	ARL13B_KAN565-5_2.tif:0008-0641	3.016	1046.43	100	2876	50.824	103.345	0.321	3156.23	121386	4.781	0.209	0.758	1.00752
559	ARL13B_KAN565-5_2.tif:0009-0667	1.56	485.333	282	848	168.254	107.602	0.379	757.166	29120	4.122	0.243	0.702	0.241699
560	ARL13B_KAN565-5_2.tif:0010-0693	3.666	1453.97	343	4375	136.8	111.716	0.403	5330.58	205010	4.924	0.203	0.71	1.70161
561	ARL13B_KAN565-5_2.tif:0011-0742	1.95	556.76	179	1117	82.441	119.58	0.458	1085.75	41757	3.501	0.286	0.725	0.346588
562	ARL13B_KAN565-5_2.tif:0012-0828	4.108	518.133	109	1518	158.638	133.375	0.225	2128.62	81865	6.913	0.145	0.611	0.679489
563	ARL13B_KAN565-5_2.tif:0013-0883	3.666	603.447	188	1554	136.902	142.499	0.328	2212.37	85086	6.798	0.147	0.734	0.706223
564	ARL13B_KAN565-5_2.tif:0014-0906	2.704	1066.84	246	2888	30.42	146.128	0.292	2884.9	110951	7.06	0.142	0.689	0.920906
565	ARL13B_KAN565-5_2.tif:0015-1012	2.262	460.609	215	853	177.53	163.557	0.295	1041.96	40073	4.811	0.208	0.59	0.33261
566	ARL13B_KAN565-5_3.tif:0001-0032	3.328	858.797	273	2242	151.729	5.522	0.34	2858.25	109926	4.876	0.205	0.623	0.912398
567	ARL13B_KAN565-5_3.tif:0002-0053	2.86	1240.24	317	3195	85.981	8.491	0.469	3547.32	136427	3.533	0.283	0.717	1.13236
568	ARL13B_KAN565-5_3.tif:0003-0092	3.952	894.395	238	2585	53.129	14.904	0.467	3534.86	135948	4.047	0.247	0.756	1.12838
569	ARL13B_KAN565-5_3.tif:0004-0154	3.198	1114.88	93	2361	20.833	25.001	0.314	3565.59	137130	6.314	0.158	0.668	1.13819
570	ARL13B_KAN565-5_3.tif:0005-0289	3.042	585.821	283	1493	171.27	46.675	0.288	1782.17	68541	4.611	0.217	0.616	0.568898
571	ARL13B_KAN565-5_3.tif:0006-0328	0.598	464.913	288	745	22.074	52.858	0.451	278.035	10693	4.05	0.247	0.767	0.0887531
572	ARL13B_KAN565-5_3.tif:0007-0355	4.108	793.304	173	1711	50.608	57.647	0.353	3259.09	125342	4.694	0.213	0.674	1.04035
573	ARL13B_KAN565-5_3.tif:0008-0495	4.446	1417.23	221	4073	131.069	79.609	0.395	6301.38	242346	4.092	0.244	0.718	2.0115
574	ARL13B_KAN565-5_3.tif:0009-0564	3.978	1065.84	175	2972	146.152	91.154	0.455	4240.18	163074	3.244	0.308	0.729	1.35353
575	ARL13B_KAN565-5_3.tif:0010-0563	2.106	649.704	127	1422	12.965	90.787	0.349	1368.36	52626	5.809	0.172	0.743	0.436802
576	ARL13B_KAN565-5_3.tif:0011-0585	2.106	619.025	236	1392	30.322	94.185	0.478	1303.74	50141	4.008	0.25	0.835	0.416176
577	ARL13B_KAN565-5_3.tif:0012-0630	2.106	836.667	201	2751	91.846	101.634	0.495	1762.13	67770	3.876	0.258	0.761	0.562499
578	ARL13B_KAN565-5_3.tif:0013-0876	2.444	1601.52	375	3714	14.485	141.6	0.432	3914.35	150543	3.366	0.297	0.684	1.24952
579	ARL13B_KAN565-5_3.tif:0014-0899	2.184	601.071	259	1394	133.991	145.173	0.297	1312.82	50490	5.23	0.191	0.581	0.419073
580	ARL13B_KAN565-5_4.tif:0001-0065	2.314	828.27	346	2232	96.041	10.792	0.33	1916.73	73716	5.169	0.193	0.674	0.611851
581	ARL13B_KAN565-5_4.tif:0002-0130	0.884	413.382	258	615	211.413	20.972	0.295	365.452	14055	4.285	0.233	0.523	0.116658
582	ARL13B_KAN565-5_4.tif:0003-0317	4.342	1002.68	358	3361	76.955	51.242	0.488	4353.91	167448	3.727	0.268	0.752	1.38984
583	ARL13B_KAN565-5_4.tif:0004-0339	4.992	795.323	339	1656	221.692	54.665	0.441	3970.49	152702	4.616	0.217	0.787	1.26744
584	ARL13B_KAN565-5_4.tif:0005-0448	3.744	849.896	14	2518	158.602	72.029	0.431	3182.2	122385	3.024	0.331	0.656	1.01581
585	ARL13B_KAN565-5_4.tif:0006-0484	5.304	723.093	82	2430	103.344	78.745	0.275	3835.52	147511	2.432	0.411	0.515	1.22436
586	ARL13B_KAN565-5_4.tif:0007-0636	1.768	429.618	187	709	111.962	102.702	0.463	759.61	29214	3.897	0.257	0.76	0.242479
587	ARL13B_KAN565-5_4.tif:0008-0750	0.676	307.308	57	468	28.405	121.155	0.413	207.753	7990	3.979	0.251	0.667	0.0663179
588	ARL13B_KAN565-5_4.tif:0009-0822	2.86	580.891	309	1239	201.158	132.741	0.434	1661.45	63898	4.417	0.226	0.741	0.530361
589	ARL13B_KAN565-5_4.tif:0010-0846	2.73	569.762	132	1347	54.651	136.354	0.205	1555.54	59825	6.593	0.152	0.486	0.496554
590	ARL13B_KAN565-5_5.tif:0001-0065	2.132	904.878	181	2702	207.137	10.694	0.329	1929.32	74200	4.481	0.223	0.577	0.615868
591	ARL13B_KAN565-5_5.tif:0002-0098	5.018	1777.64	334	5134	83.349	16.039	0.361	8920.72	343084	5.759	0.174	0.767	2.84764
592	ARL13B_KAN565-5_5.tif:0003-0224	2.392	962.978	139	2647	205.361	36.146	0.331	2303.58	88594	6.048	0.165	0.681	0.73534
593	ARL13B_KAN565-5_5.tif:0004-0387	3.874	1115.78	216	3317	43.4	62.325	0.329	4322.79	166251	5.755	0.174	0.706	1.3799
594	ARL13B_KAN565-5_5.tif:0005-0614	3.146	570.116	164	1171	181.784	98.9	0.439	1793.69	68984	4.055	0.247	0.745	0.572575
595	ARL13B_KAN565-5_5.tif:0006-0725	2.704	597.856	253	1132	158.616	117.004	0.483	1616.7	62177	3.38	0.296	0.776	0.516076
596	ARL13B_KAN565-5_5.tif:0007-0760	1.794	583.986	255	1247	222.033	122.584	0.376	1047.73	40295	3.532	0.283	0.66	0.334453
597	ARL13B_KAN565-5_5.tif:0008-1030	1.768	1124.72	368	2482	66.335	166.192	0.426	1988.63	76481	4.699	0.213	0.731	0.634801
598	ARL13B_KAN565-5_6.tif:0001-0022	2.418	460.677	152	1084	36.006	3.29	0.284	1113.98	42843	2.462	0.406	0.467	0.355602
599	ARL13B_KAN565-5_6.tif:0002-0094	1.066	497.439	127	845	2.814	14.951	0.451	530.302	20395	2.144	0.466	0.617	0.169281
600	ARL13B_KAN565-5_6.tif:0003-0109	1.274	717.551	166	2035	2.282	17.752	0.45	914.215	35160	3.81	0.262	0.754	0.291832
601	ARL13B_KAN565-5_6.tif:0004-0203	3.874	1164.75	95	3781	194.215	32.834	0.388	4512.52	173548	4.038	0.248	0.635	1.44047
602	ARL13B_KAN565-5_6.tif:0005-0310	2.366	1109.56	219	4165	22.913	50.019	0.284	2625.38	100970	5.719	0.175	0.7	0.838062
603	ARL13B_KAN565-5_6.tif:0006-0487	2.366	691.396	177	1254	178.884	78.935	0.417	1635.94	62917	3.566	0.28	0.765	0.522218
604	ARL13B_KAN565-5_6.tif:0007-0595	0.78	451.3	315	730	172.93	95.976	0.46	352.035	13539	4.334	0.231	0.706	0.112375
605	ARL13B_KAN565-5_6.tif:0008-0667	3.276	783.103	352	1456	221.071	107.622	0.365	2565.6	98671	5.828	0.172	0.766	0.81898
606	ARL13B_KAN565-5_6.tif:0009-0828	3.172	724.516	158	1863	178.965	133.419	0.444	2298.3	88391	3.276	0.305	0.687	0.733655
607	ARL13B_KAN565-5_6.tif:0010-0850	2.444	632.298	92	1208	71.307	137.32	0.365	1545.43	59436	3.957	0.253	0.653	0.493325
608	ARL13B_KAN565-5_6.tif:0011-0993	1.612	771.323	353	1463	3.534	160.251	0.356	1243.45	47822	4.535	0.22	0.602	0.396928
609	ARL13B_KAN565-5_6.tif:0012-1011	2.626	517.287	351	755	219.09	162.913	0.387	1358.48	52246	5.058	0.198	0.685	0.433648
										94994.9				0.788469
610	ARL13B_KAN565-6_1.tif:0001-0010	1.326	1018.22	362	2004	18.406	1.718	0.443	1350.23	51929	4.39	0.228	0.708	0.431017
611	ARL13B_KAN565-6_1.tif:0002-0073	2.366	796.78	306	2383	176.784	12.109	0.304	1885.3	72507	5.071	0.197	0.595	0.601816
612	ARL13B_KAN565-6_1.tif:0003-0230	3.042	1471.7	231	5886	56.405	37.372	0.484	4477.18	172189	2.758	0.363	0.699	1.42919
613	ARL13B_KAN565-6_1.tif:0004-0311	0.65	487.6	349	921	17.083	50.178	0.374	316.959	12190	5.075	0.197	0.595	0.101178
614	ARL13B_KAN565-6_1.tif:0005-0348	3.536	718.794	204	1947	64.097	56.015	0.414	2541.81	97756	4.142	0.241	0.689	0.811386
615	ARL13B_KAN565-6_1.tif:0006-0428	2.86	685.936	289	1152	87.645	68.918	0.424	1961.9	75453	4.565	0.219	0.806	0.626268
616	ARL13B_KAN565-6_1.tif:0007-0450	0.546	389.095	88	579	4.511	72.536	0.393	212.459	8171	3.246	0.308	0.677	0.0678202
617	ARL13B_KAN565-6_1.tif:0008-0480	1.222	409.043	286	588	105.274	77.518	0.408	499.88	19225	2.433	0.411	0.591	0.15957
618	ARL13B_KAN565-6_1.tif:0009-0573	4.082	834.898	236	2255	168.093	92.672	0.363	3408.26	131079	4.636	0.216	0.692	1.08797
619	ARL13B_KAN565-6_1.tif:0010-0646	2.028	501.5	168	935	222.655	104.318	0.331	1017.1	39117	5.676	0.176	0.75	0.324675
620	ARL13B_KAN565-6_1.tif:0011-0666	3.38	866.169	115	2681	111.069	107.431	0.407	2927.83	112602	3.837	0.261	0.655	0.934609
621	ARL13B_KAN565-6_1.tif:0012-0752	1.56	500.383	183	1042	182.909	121.591	0.393	780.645	30023	2.493	0.401	0.615	0.249194
622	ARL13B_KAN565-6_1.tif:0013-0850	0.754	597.483	342	991	15.06	137.076	0.488	450.529	17327	3.978	0.251	0.806	0.143816
623	ARL13B_KAN565-6_1.tif:0014-0861	0.598	428.217	157	774	150.176	138.798	0.464	256.089	9849	3.582	0.279	0.648	0.0817478
624	ARL13B_KAN565-6_1.tif:0015-0939	3.848	795.419	187	2121	118.446	151.559	0.294	3060.96	117722	5.912	0.169	0.651	0.977106
625	ARL13B_KAN565-6_1.tif:0016-0940	0.988	487.395	268	908	206.413	151.516	0.49	481.575	18521	3.55	0.282	0.655	0.153726
626	ARL13B_KAN565-6_1.tif:0017-1027	2.314	546.438	241	1388	35.244	165.63	0.221	1264.53	48633	9.186	0.109	0.709	0.403659
627	ARL13B_KAN565-6_1.tif:0018-1033	1.144	751.682	351	1759	181.439	166.67	0.446	859.976	33074	3.934	0.254	0.739	0.274518
628	ARL13B_KAN565-6_2.tif:0001-0045	3.978	613.51	98	2304	59.597	7.174	0.301	2440.69	93867	5.992	0.167	0.584	0.779107
629	ARL13B_KAN565-6_2.tif:0002-0092	1.924	625.324	319	1175	206.675	14.9	0.409	1203.2	46274	4.497	0.222	0.652	0.384079
630	ARL13B_KAN565-6_2.tif:0003-0170	3.9	1075.63	0	3448	146.681	27.281	0.484	4195.22	161345	3.502	0.286	0.732	1.33918
631	ARL13B_KAN565-6_2.tif:0004-0418	3.562	940.927	266	3151	139.266	67.403	0.276	3351.78	128907	6.839	0.146	0.609	1.06994
632	ARL13B_KAN565-6_2.tif:0005-0692	3.25	630.768	214	1435	128.793	111.466	0.473	2050.12	78846	3.466	0.289	0.733	0.654431
633	ARL13B_KAN565-6_2.tif:0006-0708	1.846	834.662	222	1965	151.728	114.314	0.421	1540.88	59261	4.633	0.216	0.776	0.491873
634	ARL13B_KAN565-6_2.tif:0007-0711	2.652	854.039	184	1865	211.239	114.78	0.443	2265.05	87112	4.664	0.214	0.826	0.723039
635	ARL13B_KAN565-6_2.tif:0008-0936	3.77	1682.64	261	3759	220.611	151.008	0.384	6343.94	243983	5.682	0.176	0.747	2.02509
636	ARL13B_KAN565-6_2.tif:0009-0933	1.378	728.491	363	1673	79.464	150.46	0.368	1003.92	38610	5.625	0.178	0.654	0.320467
637	ARL13B_KAN565-6_2.tif:0010-0969	1.742	666.627	355	1127	38.954	156.219	0.269	1161.33	44664	7.622	0.131	0.684	0.370716
638	ARL13B_KAN565-6_3.tif:0001-0039	1.794	502.899	114	859	73.954	6.236	0.409	902.254	34700	2.005	0.499	0.613	0.288014
639	ARL13B_KAN565-6_3.tif:0002-0063	3.822	1226.16	0	4686	184.875	9.941	0.413	4686.65	180245	4.66	0.215	0.742	1.49605
640	ARL13B_KAN565-6_3.tif:0003-0073	2.21	504.2	331	796	64.222	11.785	0.481	1114.35	42857	3.972	0.252	0.783	0.355718
641	ARL13B_KAN565-6_3.tif:0004-0180	4.16	844.925	118	2469	196.858	29.116	0.437	3515.1	135188	4.385	0.228	0.757	1.12208
642	ARL13B_KAN565-6_3.tif:0005-0207	4.576	1154.93	215	3647	138.074	33.323	0.374	5285.29	203268	4.898	0.204	0.798	1.68715
643	ARL13B_KAN565-6_3.tif:0006-0216	3.484	997.836	0	3974	106.279	34.825	0.275	3476.67	133710	4.877	0.205	0.538	1.10981
644	ARL13B_KAN565-6_3.tif:0007-0270	2.522	550.866	0	1145	27.442	43.947	0.386	1389.37	53434	1.921	0.521	0.593	0.443508
645	ARL13B_KAN565-6_3.tif:0008-0322	1.924	446.419	229	749	222.015	51.96	0.292	858.962	33035	5.987	0.167	0.736	0.274194
646	ARL13B_KAN565-6_3.tif:0009-0328	1.326	588.451	259	1379	168.182	52.93	0.435	780.333	30011	4.25	0.235	0.761	0.249095
647	ARL13B_KAN565-6_3.tif:0010-0619	3.64	1056.56	99	2873	92.182	99.562	0.239	3846.1	147918	7.075	0.141	0.569	1.22774
648	ARL13B_KAN565-6_3.tif:0011-0641	1.118	956	178	2370	130.971	103.314	0.49	1068.87	41108	3.041	0.329	0.735	0.341201
649	ARL13B_KAN565-6_3.tif:0012-0722	3.094	1020.6	185	3009	42.09	116.433	0.435	3157.92	121451	4.444	0.225	0.815	1.00806
650	ARL13B_KAN565-6_3.tif:0013-0753	2.886	983.604	295	2412	96.379	121.518	0.33	2838.85	109180	6.826	0.146	0.813	0.906206
651	ARL13B_KAN565-6_3.tif:0014-0819	3.666	889.333	310	3159	106.87	132.228	0.293	3260.49	125396	5.774	0.173	0.623	1.0408
652	ARL13B_KAN565-6_3.tif:0015-0820	3.042	1502.47	230	5977	63.772	132.151	0.484	4570.79	175789	2.938	0.34	0.711	1.45907
653	ARL13B_KAN565-6_3.tif:0016-0923	2.756	660.179	177	1441	26.475	148.431	0.25	1819.56	69979	5.332	0.188	0.506	0.580834
654	ARL13B_KAN565-6_3.tif:0017-1026	2.236	1458.48	227	3442	123.919	165.705	0.375	3261.35	125429	4.821	0.207	0.738	1.04107
655	ARL13B_KAN565-6_4.tif:0001-0083	2.054	953.772	318	2363	206.505	13.399	0.468	1959.17	75348	3.627	0.276	0.693	0.625397
656	ARL13B_KAN565-6_4.tif:0002-0198	3.198	636.472	232	1633	160.232	31.958	0.336	2035.56	78286	5.405	0.185	0.642	0.649783
657	ARL13B_KAN565-6_4.tif:0003-0255	1.586	641.197	271	1273	13.475	41.051	0.349	1017	39113	5.139	0.195	0.57	0.324642
658	ARL13B_KAN565-6_4.tif:0004-0346	3.744	809.486	343	2402	119.94	55.757	0.416	3030.9	116566	4.622	0.216	0.774	0.967511
659	ARL13B_KAN565-6_4.tif:0005-0427	3.224	594.774	249	1272	120.449	68.849	0.397	1917.67	73752	5.062	0.198	0.743	0.61215
660	ARL13B_KAN565-6_4.tif:0006-0471	0.78	404.1	208	571	167.286	76.046	0.415	315.217	12123	4.551	0.22	0.732	0.100622
661	ARL13B_KAN565-6_4.tif:0007-0488	2.106	683.272	310	1722	168.712	78.838	0.487	1439.06	55345	3.677	0.272	0.771	0.45937
662	ARL13B_KAN565-6_4.tif:0008-0538	2.314	817.27	131	2594	39.408	86.915	0.322	1891.28	72737	6.164	0.162	0.761	0.603725
663	ARL13B_KAN565-6_4.tif:0009-0539	3.64	780.071	272	1994	125.063	86.977	0.479	2839.63	109210	4.215	0.237	0.846	0.906455
664	ARL13B_KAN565-6_4.tif:0010-0566	2.86	1045.6	350	2851	221.195	91.303	0.496	2990.6	115016	4.004	0.25	0.84	0.954646
665	ARL13B_KAN565-6_4.tif:0011-0652	2.548	1159.62	233	2736	53.742	105.15	0.33	2954.9	113643	3.401	0.294	0.611	0.94325
666	ARL13B_KAN565-6_4.tif:0012-0782	2.418	524.925	101	1466	137.426	126.286	0.354	1269.34	48818	3.925	0.255	0.637	0.405195
667	ARL13B_KAN565-6_4.tif:0013-0796	2.21	773.882	351	1312	172.908	128.339	0.375	1710.38	65780	5.553	0.18	0.78	0.545981
668	ARL13B_KAN565-6_4.tif:0014-0808	1.742	528.463	314	1123	24.564	130.125	0.253	920.637	35407	5.503	0.182	0.543	0.293882
669	ARL13B_KAN565-6_4.tif:0015-0862	0.728	574.464	373	1001	9.013	139.124	0.412	418.235	16085	5.316	0.188	0.644	0.133507
670	ARL13B_KAN565-6_4.tif:0016-0892	0.936	1132.83	114	3791	145.837	143.759	0.431	1060.4	40782	2.602	0.384	0.615	0.338495
671	ARL13B_KAN565-6_4.tif:0017-0930	1.508	497.966	311	842	94.189	150.032	0.471	750.977	28882	3.127	0.32	0.674	0.239724
672	ARL13B_KAN565-6_5.tif:0001-0004	1.482	783.947	57	2358	147.995	0.678	0.239	1161.88	44685	8.905	0.112	0.826	0.370891
673	ARL13B_KAN565-6_5.tif:0002-0079	1.508	551.69	245	1115	24.346	12.825	0.397	831.998	31998	3.351	0.298	0.634	0.265587
674	ARL13B_KAN565-6_5.tif:0003-0121	2.236	675.698	351	1334	168.523	19.549	0.247	1510.95	58110	8.532	0.117	0.649	0.48232
675	ARL13B_KAN565-6_5.tif:0004-0220	3.874	1309.99	46	4045	138.375	35.362	0.37	5075.19	195188	3.399	0.294	0.598	1.62008
676	ARL13B_KAN565-6_5.tif:0005-0217	3.562	1627.26	325	5899	96.372	34.875	0.479	5796.63	222934	3.585	0.279	0.785	1.85038
677	ARL13B_KAN565-6_5.tif:0006-0431	5.278	1124.86	136	2944	134.793	69.777	0.249	5937.35	228346	4.691	0.213	0.518	1.8953
678	ARL13B_KAN565-6_5.tif:0007-0435	2.288	899.466	250	2451	158.509	70.268	0.233	2058.1	79153	6.393	0.156	0.538	0.656979
679	ARL13B_KAN565-6_5.tif:0008-0471	2.106	869.654	360	1805	93.454	75.968	0.432	1831.6	70442	4.001	0.25	0.707	0.584677
680	ARL13B_KAN565-6_5.tif:0009-0542	2.21	1054.02	0	3203	163.981	87.539	0.441	2329.53	89592	3.88	0.258	0.72	0.743624
681	ARL13B_KAN565-6_5.tif:0010-0635	1.898	641.836	228	1431	166.316	102.298	0.405	1218.28	46854	3.681	0.272	0.679	0.388893
682	ARL13B_KAN565-6_5.tif:0011-0668	2.366	1052.8	174	2552	137.682	107.723	0.292	2491.08	95805	5.364	0.186	0.567	0.795192
683	ARL13B_KAN565-6_5.tif:0012-0890	2.028	657.115	61	1646	91.036	143.554	0.344	1332.71	51255	4.459	0.224	0.582	0.425422
684	ARL13B_KAN565-6_5.tif:0013-0999	2.938	1197.12	289	3273	204.921	161.138	0.472	3517.36	135275	3.422	0.292	0.739	1.1228
685	ARL13B_KAN565-6_6.tif:0001-0190	1.456	644.875	67	1232	89.563	30.799	0.486	938.995	36113	1.693	0.591	0.651	0.299742
686	ARL13B_KAN565-6_6.tif:0002-0254	2.366	522.429	108	1191	157.177	41.327	0.413	1236.14	47541	3.767	0.265	0.74	0.394596
687	ARL13B_KAN565-6_6.tif:0003-0271	3.588	608.899	81	1257	173.593	44.157	0.318	2184.86	84028	4.791	0.209	0.695	0.697442
688	ARL13B_KAN565-6_6.tif:0004-0355	0.702	445.222	246	597	179.588	57.366	0.319	312.565	12021	4.688	0.213	0.551	0.0997757
689	ARL13B_KAN565-6_6.tif:0005-0610	2.808	909.556	289	2542	201.306	98.576	0.409	2554.19	98232	4.347	0.23	0.699	0.815337
690	ARL13B_KAN565-6_6.tif:0006-0653	2.704	629.173	156	1750	29.909	105.409	0.269	1701.39	65434	6.956	0.144	0.63	0.54311
691	ARL13B_KAN565-6_6.tif:0007-0685	3.198	1126.87	351	3935	166.85	110.449	0.318	3603.95	138605	6.434	0.155	0.634	1.15044
692	ARL13B_KAN565-6_6.tif:0008-0692	2.964	1068.45	350	2625	193.675	111.514	0.439	3167.07	121803	4.501	0.222	0.794	1.01098
693	ARL13B_KAN565-6_6.tif:0009-0727	1.144	481.545	170	765	104.736	117.221	0.407	550.921	21188	3.814	0.262	0.595	0.175863
694	ARL13B_KAN565-6_6.tif:0010-0802	1.378	599.132	252	1724	143.964	129.4	0.357	825.654	31754	5.864	0.171	0.702	0.263562
695	ARL13B_KAN565-6_6.tif:0011-0997	1.43	646.764	282	1472	191.854	160.73	0.37	924.928	35572	5.299	0.189	0.663	0.295252
696	ARL13B_KAN565-6_6.tif:0012-1019	2.314	1013.58	238	2757	28.098	164.287	0.279	2345.57	90209	7.078	0.141	0.718	0.748745
										80942.1				0.671829
697	ARL13B_KAN565-7_1.tif:0001-0155	3.458	1443.95	324	7357	108.523	25.06	0.48	4993.5	192046	3.977	0.251	0.801	1.594
698	ARL13B_KAN565-7_1.tif:0002-0309	3.874	994.389	133	2513	52.853	49.786	0.341	3852.5	148164	4.348	0.23	0.612	1.22978
699	ARL13B_KAN565-7_1.tif:0003-0358	1.196	420.174	351	579	120.31	57.664	0.34	502.558	19328	5.207	0.192	0.692	0.160425
700	ARL13B_KAN565-7_1.tif:0004-0433	6.864	907.795	0	3285	139.551	69.507	0.353	6231.48	239658	2.967	0.337	0.619	1.98919
701	ARL13B_KAN565-7_1.tif:0005-0422	3.198	499.862	285	915	79.703	68.152	0.446	1598.65	61483	3.841	0.26	0.764	0.510316
702	ARL13B_KAN565-7_1.tif:0006-0559	2.704	545.163	309	997	25.295	90.162	0.356	1474.21	56697	5.842	0.171	0.754	0.470591
703	ARL13B_KAN565-7_1.tif:0007-0566	2.496	550.427	308	922	207.912	91.345	0.384	1373.95	52841	5.46	0.183	0.787	0.438586
704	ARL13B_KAN565-7_1.tif:0008-0693	3.588	448.051	278	733	117.769	111.92	0.263	1607.7	61831	5.796	0.173	0.573	0.513204
705	ARL13B_KAN565-7_1.tif:0009-0777	2.886	1088.35	246	4078	74.661	125.353	0.42	3141.17	120807	4.449	0.225	0.728	1.00271
706	ARL13B_KAN565-7_1.tif:0010-0865	2.964	521.026	313	773	4.422	139.528	0.362	1544.41	59397	5.866	0.17	0.823	0.493002
707	ARL13B_KAN565-7_2.tif:0001-0027	5.304	552.819	134	1515	179.86	4.133	0.251	2932.33	112775	7.88	0.127	0.659	0.936045
708	ARL13B_KAN565-7_2.tif:0002-0022	1.768	476.529	325	672	17.308	3.555	0.296	842.555	32404	6.578	0.152	0.716	0.268957
709	ARL13B_KAN565-7_2.tif:0003-0093	4.576	1298.3	178	4607	105.016	15.257	0.354	5941.36	228500	5.536	0.181	0.777	1.89658
710	ARL13B_KAN565-7_2.tif:0004-0089	1.794	435.101	111	995	210.016	14.306	0.37	780.619	30022	4.016	0.249	0.627	0.249186
711	ARL13B_KAN565-7_2.tif:0005-0103	2.47	1004.93	354	3297	51.891	17.039	0.197	2482.32	95468	8.785	0.114	0.601	0.792395
712	ARL13B_KAN565-7_2.tif:0006-0176	6.084	1121.71	71	4141	134.793	28.131	0.352	6824.89	262480	5.177	0.193	0.72	2.17861
713	ARL13B_KAN565-7_2.tif:0007-0244	2.86	642.009	228	1413	84.23	39.465	0.201	1836.26	70621	6.904	0.145	0.518	0.586162
714	ARL13B_KAN565-7_2.tif:0008-0326	5.304	955.578	69	2375	160.989	52.6	0.412	5068.69	194938	3.208	0.312	0.696	1.61801
715	ARL13B_KAN565-7_2.tif:0009-0414	3.822	547.306	350	1062	29.865	66.788	0.359	2091.93	80454	5.148	0.194	0.733	0.667777
716	ARL13B_KAN565-7_2.tif:0010-0557	3.354	986.775	275	3224	60.819	90.107	0.424	3309.84	127294	3.865	0.259	0.713	1.05655
717	ARL13B_KAN565-7_2.tif:0011-0845	1.378	687.321	355	1311	123.61	136.462	0.345	947.185	36428	5.863	0.171	0.697	0.302356
718	ARL13B_KAN565-7_2.tif:0012-0952	1.768	576.118	178	1176	12.872	153.323	0.259	1018.64	39176	5.182	0.193	0.553	0.325165
719	ARL13B_KAN565-7_2.tif:0013-0965	5.044	1011.5	119	2937	159.001	155.341	0.274	5102.29	196230	7.854	0.127	0.831	1.62873
720	ARL13B_KAN565-7_3.tif:0001-0005	1.352	818.519	294	1880	136.303	0.76	0.318	1106.7	42563	5.408	0.185	0.806	0.353278
721	ARL13B_KAN565-7_3.tif:0002-0038	3.562	833.774	344	2824	113.344	6.226	0.405	2970.08	114227	5.311	0.188	0.783	0.948097
722	ARL13B_KAN565-7_3.tif:0003-0215	4.03	467.665	131	887	65.198	34.571	0.228	1884.8	72488	8.66	0.115	0.614	0.601659
723	ARL13B_KAN565-7_3.tif:0004-0260	4.056	1775.81	246	4866	185.22	41.69	0.394	7203.11	277026	4.365	0.229	0.741	2.29935
724	ARL13B_KAN565-7_3.tif:0005-0286	0.91	457.971	220	719	102.064	46.092	0.484	416.779	16029	3.226	0.31	0.648	0.133043
725	ARL13B_KAN565-7_3.tif:0006-0369	4.81	1124.16	189	4365	104.635	59.805	0.349	5407.52	207969	4.485	0.223	0.681	1.72617
726	ARL13B_KAN565-7_3.tif:0007-0389	2.6	568.11	319	1040	50.994	62.709	0.403	1477.17	56811	4.215	0.237	0.697	0.471538
727	ARL13B_KAN565-7_3.tif:0008-0400	4.134	1288.74	331	4376	118.217	64.506	0.34	5327.98	204910	6.317	0.158	0.797	1.70078
728	ARL13B_KAN565-7_3.tif:0009-0399	2.08	996.913	198	2827	159.633	64.387	0.467	2073.7	79753	3.543	0.282	0.788	0.661959
729	ARL13B_KAN565-7_3.tif:0010-0437	3.484	1148.33	273	3888	83.657	70.49	0.429	4001.02	153876	5.189	0.193	0.798	1.27719
730	ARL13B_KAN565-7_3.tif:0011-0464	4.81	1476.35	228	6017	150.815	74.882	0.399	7101.68	273125	5.117	0.195	0.799	2.26697
731	ARL13B_KAN565-7_3.tif:0012-0471	1.274	456.571	149	923	179.585	76.043	0.497	581.707	22372	2.548	0.393	0.715	0.18569
732	ARL13B_KAN565-7_3.tif:0013-0479	3.432	1723.76	37	6603	91.871	76.968	0.364	5916.29	227536	5.505	0.182	0.686	1.88857
733	ARL13B_KAN565-7_3.tif:0014-0493	2.34	698.111	133	2123	213.982	79.496	0.233	1633.68	62830	8.728	0.115	0.625	0.521496
734	ARL13B_KAN565-7_3.tif:0015-0489	0.676	406.923	196	625	181.853	78.932	0.403	275.097	10580	5.856	0.171	0.8	0.0878152
735	ARL13B_KAN565-7_3.tif:0016-0637	2.574	623.081	69	1622	4.127	102.649	0.464	1603.91	61685	3.943	0.254	0.731	0.511992
736	ARL13B_KAN565-7_3.tif:0017-0665	4.03	973.058	250	3032	80.616	107.512	0.406	3921.66	150824	3.963	0.252	0.651	1.25186
737	ARL13B_KAN565-7_3.tif:0018-0774	0.65	522.56	354	971	48.114	124.914	0.277	339.684	13064	5.895	0.17	0.588	0.108433
738	ARL13B_KAN565-7_3.tif:0019-0781	4.498	943.751	316	2623	15.837	125.72	0.268	4245.25	163269	5.774	0.173	0.641	1.35515
739	ARL13B_KAN565-7_3.tif:0020-0799	0.962	463.054	360	697	52.496	128.915	0.401	445.485	17133	4.467	0.224	0.661	0.142206
740	ARL13B_KAN565-7_3.tif:0021-0802	3.848	2544.07	354	7743	140.119	129.372	0.492	9790.16	376522	4.152	0.241	0.804	3.12517
741	ARL13B_KAN565-7_3.tif:0022-0978	1.066	571.22	352	873	8.973	157.72	0.494	608.957	23420	3.63	0.275	0.732	0.194389
742	ARL13B_KAN565-7_3.tif:0023-0980	1.508	737.259	313	1755	180.453	157.958	0.415	1111.85	42761	5.943	0.168	0.866	0.354921
743	ARL13B_KAN565-7_3.tif:0024-1015	1.482	762.123	254	1461	219.075	163.602	0.331	1129.53	43441	5.336	0.187	0.597	0.360565
744	ARL13B_KAN565-7_4.tif:0001-0051	1.898	499.411	268	1175	149.21	8.256	0.475	947.939	36457	3.927	0.255	0.723	0.302597
745	ARL13B_KAN565-7_4.tif:0002-0152	3.172	953.705	305	2169	140.058	24.577	0.488	3025.33	116352	3.892	0.257	0.811	0.965735
746	ARL13B_KAN565-7_4.tif:0003-0160	5.616	1109.22	118	3249	174.387	25.668	0.276	6229.74	239591	5.242	0.191	0.615	1.98863
747	ARL13B_KAN565-7_4.tif:0004-0208	5.876	750.876	219	1703	87.808	33.061	0.276	4412.41	169698	1.889	0.529	0.514	1.40851
748	ARL13B_KAN565-7_4.tif:0005-0342	3.12	873.483	122	2272	157.105	55.074	0.49	2725.43	104818	3.146	0.318	0.811	0.870001
749	ARL13B_KAN565-7_4.tif:0006-0565	1.976	485.566	355	810	112.476	90.915	0.347	959.536	36903	5.568	0.18	0.7	0.306299
750	ARL13B_KAN565-7_4.tif:0007-0736	3.328	876.961	166	3087	174.081	118.723	0.244	2918.7	112251	7.567	0.132	0.533	0.931696
751	ARL13B_KAN565-7_4.tif:0008-0761	2.496	445.229	303	639	200.365	122.394	0.261	1111.36	42742	7.118	0.14	0.61	0.354763
752	ARL13B_KAN565-7_4.tif:0009-0853	5.564	950.477	119	3072	63.957	137.601	0.316	5288.77	203402	5.484	0.182	0.695	1.68826
753	ARL13B_KAN565-7_4.tif:0010-0931	1.56	541.2	198	1280	29.21	150.247	0.439	844.323	32472	4.023	0.249	0.682	0.269521
754	ARL13B_KAN565-7_5.tif:0001-0038	2.652	851.5	350	1500	23.614	6.132	0.319	2258.31	86853	6.197	0.161	0.739	0.72089
755	ARL13B_KAN565-7_5.tif:0002-0039	1.586	493.82	17	1309	166.015	6.515	0.317	783.245	30123	5.34	0.187	0.598	0.250024
756	ARL13B_KAN565-7_5.tif:0003-0055	3.042	888.026	30	2798	118.774	8.868	0.472	2701.54	103899	4.359	0.229	0.833	0.862373
757	ARL13B_KAN565-7_5.tif:0004-0132	2.73	921.39	350	2302	13.758	21.324	0.219	2515.55	96746	9.995	0.1	0.665	0.803003
758	ARL13B_KAN565-7_5.tif:0005-0165	3.12	756.633	133	1978	218.124	27.089	0.222	2360.84	90796	3.061	0.327	0.41	0.753617
759	ARL13B_KAN565-7_5.tif:0006-0241	4.394	1053.22	108	2520	83.407	38.922	0.225	4628.12	177994	8.286	0.121	0.655	1.47737
760	ARL13B_KAN565-7_5.tif:0007-0242	0.936	634.861	352	1162	141.197	39.023	0.425	594.266	22855	4.817	0.208	0.727	0.189699
761	ARL13B_KAN565-7_5.tif:0008-0257	4.68	1616.59	208	5636	47.39	41.398	0.314	7566.09	290986	6.149	0.163	0.687	2.41522
762	ARL13B_KAN565-7_5.tif:0009-0397	0.78	447	148	821	219.725	63.758	0.415	348.681	13410	2.325	0.43	0.556	0.111305
763	ARL13B_KAN565-7_5.tif:0010-0573	0.936	413.889	218	640	48.801	92.369	0.402	387.423	14900	2.58	0.388	0.667	0.123672
764	ARL13B_KAN565-7_5.tif:0011-0608	4.68	975.944	0	4348	151.082	97.755	0.261	4567.69	175670	6.251	0.16	0.585	1.45808
765	ARL13B_KAN565-7_5.tif:0012-0754	3.536	972.375	175	2205	64.853	121.316	0.252	3438.53	132243	5.91	0.169	0.576	1.09763
766	ARL13B_KAN565-7_5.tif:0013-0818	2.626	1197.06	402	2828	85.201	132.005	0.339	3143.67	120903	6.578	0.152	0.727	1.00351
767	ARL13B_KAN565-7_5.tif:0014-0827	1.976	497.145	93	950	199.483	133.229	0.247	982.417	37783	6.516	0.153	0.596	0.313603
768	ARL13B_KAN565-7_5.tif:0015-0853	3.068	1101.97	146	3008	110.078	137.39	0.298	3381.06	130033	6.868	0.146	0.688	1.07929
769	ARL13B_KAN565-7_5.tif:0016-0924	0.754	419.172	351	572	139.484	148.92	0.404	316.075	12156	3.991	0.251	0.659	0.100896
770	ARL13B_KAN565-7_5.tif:0017-0929	1.898	1461.14	369	2849	111.526	149.771	0.441	2773.41	106663	5.197	0.192	0.756	0.885315
771	ARL13B_KAN565-7_5.tif:0018-0961	4.16	797.938	329	1809	148.124	154.822	0.446	3319.62	127670	4.327	0.231	0.829	1.05968
772	ARL13B_KAN565-7_5.tif:0019-1005	1.794	967.826	350	1775	5.495	162.184	0.445	1736.38	66780	4.913	0.204	0.817	0.554282
773	ARL13B_KAN565-7_6.tif:0001-0030	3.172	1101.93	346	3114	160.29	4.736	0.403	3495.55	134436	3.886	0.257	0.668	1.11583
774	ARL13B_KAN565-7_6.tif:0002-0082	5.772	1276.36	201	3430	100.439	13.244	0.383	7367.57	283351	4.7	0.213	0.749	2.35185
775	ARL13B_KAN565-7_6.tif:0003-0112	3.458	545.767	238	829	41.682	17.962	0.279	1887.38	72587	7.395	0.135	0.713	0.60248
776	ARL13B_KAN565-7_6.tif:0004-0221	5.512	666.646	0	1786	163.209	35.585	0.168	3674.78	141329	3.596	0.278	0.335	1.17305
777	ARL13B_KAN565-7_6.tif:0005-0237	1.222	422.596	211	708	209.376	38.167	0.5	516.443	19862	3.957	0.253	0.729	0.164857
778	ARL13B_KAN565-7_6.tif:0006-0360	4.004	1021.42	290	2752	133.694	58.019	0.287	4089.99	157298	4.816	0.208	0.602	1.30559
779	ARL13B_KAN565-7_6.tif:0007-0363	3.562	772.839	249	1733	100.227	58.52	0.289	2753.02	105879	6.389	0.157	0.69	0.878808
780	ARL13B_KAN565-7_6.tif:0008-0416	2.158	702.964	155	2123	75.635	67.007	0.443	1517.09	58346	3.43	0.292	0.669	0.484278
781	ARL13B_KAN565-7_6.tif:0009-0501	4.394	1196.17	246	3379	197.155	80.889	0.195	5256.27	202152	11.219	0.089	0.631	1.67788
782	ARL13B_KAN565-7_6.tif:0010-0654	4.056	2060.91	156	6620	151.059	105.425	0.381	8359.56	321502	4.179	0.239	0.695	2.6685
783	ARL13B_KAN565-7_6.tif:0011-0688	3.874	1422.18	276	4454	163.987	110.928	0.296	5509.86	211905	6.454	0.155	0.683	1.75884
784	ARL13B_KAN565-7_6.tif:0012-0755	1.456	637	351	1262	178.916	121.534	0.263	927.528	35672	3.8	0.263	0.459	0.296082
785	ARL13B_KAN565-7_6.tif:0013-0910	0.702	487.481	376	718	212.327	146.806	0.287	342.233	13162	6.821	0.147	0.643	0.109246
										111504				0.925499
786	ARL13B_KAN565-8_1.tif:0001-0112	1.092	416.452	305	613	12.47	18.191	0.381	454.793	17491	4.812	0.208	0.694	0.145177
787	ARL13B_KAN565-8_1.tif:0002-0263	3.978	774.176	300	1928	102.13	42.48	0.37	3079.86	118449	5.322	0.188	0.685	0.98314
788	ARL13B_KAN565-8_1.tif:0003-0348	3.978	901.203	252	3584	170.957	56.359	0.32	3585.2	137884	5.039	0.198	0.613	1.14445
789	ARL13B_KAN565-8_1.tif:0004-0494	1.196	642.761	201	1141	175.398	79.447	0.443	768.788	29567	3.231	0.31	0.78	0.245409
790	ARL13B_KAN565-8_1.tif:0005-0591	1.82	413.043	139	671	105.322	95.64	0.233	751.783	28913	2.369	0.422	0.413	0.239981
791	ARL13B_KAN565-8_1.tif:0006-0633	2.158	760.976	249	1585	221.294	101.907	0.314	1642.29	63161	4.561	0.219	0.535	0.524243
792	ARL13B_KAN565-8_1.tif:0007-0706	1.04	444.575	187	727	162.185	113.891	0.312	462.386	17783	3.911	0.256	0.602	0.147601
793	ARL13B_KAN565-8_1.tif:0008-0812	2.444	686.415	354	1719	76.631	131.072	0.325	1677.7	64523	6.071	0.165	0.718	0.535548
794	ARL13B_KAN565-8_1.tif:0009-0882	2.678	788.029	163	2727	188.834	142.103	0.238	2110.47	81167	5.852	0.171	0.494	0.673695
795	ARL13B_KAN565-8_1.tif:0010-0980	0.988	471.079	169	810	78.669	158.004	0.404	465.454	17901	2.631	0.38	0.623	0.14858
796	ARL13B_KAN565-8_2.tif:0001-0048	2.782	546.514	326	1199	96.172	8.004	0.182	1520.49	58477	6.397	0.156	0.417	0.485366
797	ARL13B_KAN565-8_2.tif:0002-0214	1.04	544	52	1186	217.421	34.487	0.479	565.794	21760	3.981	0.251	0.714	0.18061
798	ARL13B_KAN565-8_2.tif:0003-0298	2.418	604.796	65	1317	139.86	48.02	0.276	1462.48	56246	5.227	0.191	0.569	0.466848
799	ARL13B_KAN565-8_2.tif:0004-0438	2.106	917.765	229	3427	60.748	70.698	0.487	1932.93	74339	2.207	0.453	0.675	0.617022
800	ARL13B_KAN565-8_2.tif:0005-0781	1.274	523.388	104	946	165.721	126.162	0.445	666.836	25646	2.512	0.398	0.641	0.212865
801	ARL13B_KAN565-8_2.tif:0006-0785	1.144	458.477	259	661	141.878	126.618	0.41	524.53	20173	4.5	0.222	0.83	0.167438
802	ARL13B_KAN565-8_2.tif:0007-0980	1.69	585.985	314	1038	52.44	157.984	0.385	990.374	38089	4.909	0.204	0.743	0.316143
803	ARL13B_KAN565-8_3.tif:0001-0194	1.3	484.58	272	821	189.975	31.283	0.484	629.992	24229	3.476	0.288	0.709	0.201103
804	ARL13B_KAN565-8_3.tif:0002-0472	1.066	771.366	98	1847	66.759	75.931	0.451	822.326	31626	3.701	0.27	0.701	0.262499
805	ARL13B_KAN565-8_3.tif:0003-0687	0.702	516.296	294	830	213.265	110.818	0.391	362.462	13940	5.587	0.179	0.614	0.115704
806	ARL13B_KAN565-8_4.tif:0001-0883	0.728	510.571	356	865	101.017	142.487	0.422	371.718	14296	5.127	0.195	0.718	0.118658
807	ARL13B_KAN565-8_4.tif:0002-0946	1.144	591.886	348	1070	46.784	152.304	0.491	677.159	26043	3.091	0.324	0.733	0.21616
808	ARL13B_KAN565-8_5.tif:0001-0018	1.222	667.553	356	1400	205.362	2.932	0.434	815.799	31375	4.286	0.233	0.676	0.260416
809	ARL13B_KAN565-8_5.tif:0002-0022	1.768	1031.46	305	3272	27.204	3.548	0.363	1823.72	70139	5.639	0.177	0.657	0.582162
810	ARL13B_KAN565-8_5.tif:0003-0183	5.382	874.971	351	1628	182.094	29.839	0.402	4709.38	181119	5.187	0.193	0.821	1.50331
811	ARL13B_KAN565-8_5.tif:0004-0239	2.132	483.183	299	817	164.406	38.535	0.238	1030.21	39621	6.916	0.145	0.517	0.328859
812	ARL13B_KAN565-8_5.tif:0005-0325	2.964	783.956	338	2294	221.937	52.481	0.302	2323.79	89371	6.614	0.151	0.618	0.741789
813	ARL13B_KAN565-8_5.tif:0006-0412	1.95	625.387	263	1470	194.488	66.662	0.44	1219.58	46904	2.944	0.34	0.667	0.389308
814	ARL13B_KAN565-8_5.tif:0007-0490	0.598	475.522	100	874	140.319	79.086	0.405	284.379	10937	3.267	0.306	0.667	0.0907783
815	ARL13B_KAN565-8_5.tif:0008-0837	0.624	374.417	264	496	203.531	135.04	0.415	233.65	8986	4.085	0.245	0.593	0.0745848
816	ARL13B_KAN565-8_6.tif:0001-0074	1.82	483.086	263	679	127.8	11.88	0.432	879.269	33816	3.705	0.27	0.654	0.280677
817	ARL13B_KAN565-8_6.tif:0002-0080	1.586	500.525	255	873	95.657	12.682	0.499	793.88	30532	2.503	0.399	0.722	0.253419
818	ARL13B_KAN565-8_6.tif:0003-0363	2.626	748.446	254	1898	22.865	58.589	0.45	1965.54	75593	4.105	0.244	0.732	0.62743
819	ARL13B_KAN565-8_6.tif:0004-0445	1.326	732.216	42	1937	50.915	71.752	0.443	970.976	37343	3.964	0.252	0.675	0.309951
820	ARL13B_KAN565-8_6.tif:0005-0458	3.25	728.512	270	1531	194.015	73.795	0.337	2367.81	91064	6.517	0.153	0.749	0.755841
821	ARL13B_KAN565-8_6.tif:0006-0572	1.404	491	171	890	91.575	92.572	0.337	689.406	26514	3.556	0.281	0.581	0.220069
822	ARL13B_KAN565-8_6.tif:0007-0848	2.002	810.455	54	2281	31.043	136.783	0.277	1622.63	62405	5.463	0.183	0.542	0.517969
823	ARL13B_KAN565-8_6.tif:0008-0848	1.43	509.618	267	957	86.2	136.803	0.331	728.798	28029	4.975	0.201	0.636	0.232644
824	ARL13B_KAN565-8_6.tif:0009-0855	1.196	459.87	257	669	194.026	138.079	0.315	550.037	21154	3.564	0.281	0.535	0.175581
825	ARL13B_KAN565-8_6.tif:0010-0965	2.314	573.213	191	1416	119.397	155.466	0.339	1326.5	51016	4.959	0.202	0.662	0.423439
										47940.5				0.397912
1	ARL13B_KAN565-10_1.tif:0001-0028	2.99	677.061	293	1543	182.344	4.534	0.432	2024.53	77862	4.053	0.247	0.754	0.646263
2	ARL13B_KAN565-10_1.tif:0002-0177	2.392	473.152	85	850	155.669	28.692	0.479	1131.85	43530	3.019	0.331	0.739	0.361304
3	ARL13B_KAN565-10_1.tif:0003-0267	3.51	603.185	135	1359	219.394	43.392	0.308	2117.31	81430	3.356	0.298	0.559	0.675878
4	ARL13B_KAN565-10_1.tif:0004-0335	4.238	1185.28	0	3648	202.828	53.787	0.458	5023.53	193201	1.527	0.655	0.685	1.60359
5	ARL13B_KAN565-10_1.tif:0005-0345	2.236	669.942	273	1867	179.822	55.701	0.276	1498.08	57615	4.972	0.201	0.544	0.478211
6	ARL13B_KAN565-10_1.tif:0006-0409	3.016	636.552	145	1585	120.355	65.768	0.464	1919.96	73840	4.016	0.249	0.795	0.61288
7	ARL13B_KAN565-10_1.tif:0007-0416	3.536	1093.28	64	3901	138.798	67.078	0.341	3866.07	148686	4.826	0.207	0.645	1.23411
8	ARL13B_KAN565-10_1.tif:0008-0460	1.82	768.7	156	2395	38.35	74.018	0.459	1399.12	53809	3.452	0.29	0.68	0.446621
9	ARL13B_KAN565-10_1.tif:0009-0502	4.472	658.971	50	1903	164.11	81.388	0.214	2947.09	113343	7.656	0.131	0.508	0.94076
10	ARL13B_KAN565-10_1.tif:0010-0557	1.43	732.745	101	1393	208.184	89.956	0.444	1047.89	40301	2.912	0.343	0.621	0.334503
11	ARL13B_KAN565-10_1.tif:0011-0648	2.444	651.734	184	1833	78.721	104.548	0.345	1592.93	61263	4.679	0.214	0.627	0.50849
12	ARL13B_KAN565-10_1.tif:0012-0864	1.482	539.649	221	1077	164.59	139.358	0.447	799.808	30760	2.854	0.35	0.659	0.255311
13	ARL13B_KAN565-10_1.tif:0013-0924	1.17	330.556	15	844	81.548	149.051	0.419	386.773	14875	4.752	0.21	0.756	0.123464
14	ARL13B_KAN565-10_1.tif:0014-0930	2.054	565.557	352	1014	107.832	150.11	0.452	1161.72	44679	3.503	0.285	0.721	0.370841
15	ARL13B_KAN565-10_1.tif:0015-0937	3.172	1099.8	354	2527	205.569	151.026	0.302	3488.76	134175	7.071	0.141	0.682	1.11367
16	ARL13B_KAN565-10_1.tif:0016-1011	2.756	1017.25	208	2728	78.661	163.06	0.341	2803.72	107829	6	0.167	0.741	0.894993
17	ARL13B_KAN565-10_2.tif:0001-0046	2.678	1083.71	151	3724	216.361	7.5	0.457	2902.35	111622	4.528	0.221	0.777	0.926475
18	ARL13B_KAN565-10_2.tif:0002-0059	2.99	906.522	148	2998	70.645	9.708	0.37	2710.66	104250	3.645	0.274	0.612	0.865287
19	ARL13B_KAN565-10_2.tif:0003-0093	3.172	1205.8	121	3861	190.64	14.822	0.28	3825.01	147107	5.055	0.198	0.567	1.221
20	ARL13B_KAN565-10_2.tif:0004-0109	2.574	1896.87	167	6061	64.131	17.378	0.417	4882.83	187790	4.178	0.239	0.744	1.55868
21	ARL13B_KAN565-10_2.tif:0005-0109	3.198	1306.37	302	4881	157.927	17.602	0.48	4178.01	160683	3.768	0.265	0.73	1.33369
22	ARL13B_KAN565-10_2.tif:0006-0170	2.73	807.067	123	2207	38.908	27.657	0.362	2203.43	84742	5.119	0.195	0.778	0.703368
23	ARL13B_KAN565-10_2.tif:0007-0235	2.912	914.464	353	3022	47.173	37.976	0.322	2663.08	102420	5.759	0.174	0.615	0.850098
24	ARL13B_KAN565-10_2.tif:0008-0243	2.106	802.704	130	1697	28.429	39.133	0.485	1690.6	65019	3.857	0.259	0.779	0.539665
25	ARL13B_KAN565-10_2.tif:0009-0334	2.522	899.206	331	3643	105.714	53.897	0.334	2267.93	87223	5.465	0.183	0.62	0.723961
26	ARL13B_KAN565-10_2.tif:0010-0455	1.222	459.298	244	877	148.767	73.456	0.476	561.296	21587	2.389	0.419	0.691	0.179175
27	ARL13B_KAN565-10_2.tif:0011-0544	2.132	960.61	90	2704	190.71	87.736	0.386	2048.14	78770	2.448	0.409	0.607	0.6538
28	ARL13B_KAN565-10_2.tif:0012-0577	2.054	987.025	361	2386	94.565	93.128	0.389	2027.47	77975	5.593	0.179	0.745	0.647201
29	ARL13B_KAN565-10_2.tif:0013-0682	2.054	874.835	64	2106	147.902	110.102	0.373	1797.02	69112	5.48	0.182	0.661	0.573637
30	ARL13B_KAN565-10_2.tif:0014-0756	3.12	1100.66	257	3804	140.063	121.828	0.301	3434.26	132079	7.968	0.126	0.65	1.09627
31	ARL13B_KAN565-10_2.tif:0015-0790	2.106	997.321	57	2497	63.398	127.657	0.35	2100.48	80783	2.353	0.425	0.526	0.670508
32	ARL13B_KAN565-10_2.tif:0016-0873	2.132	872.671	155	1761	139.556	140.879	0.308	1860.65	71559	6.428	0.156	0.68	0.593948
33	ARL13B_KAN565-10_2.tif:0017-0913	2.158	900.892	375	1857	97.295	147.424	0.247	1944.24	74774	8.503	0.118	0.629	0.620633
34	ARL13B_KAN565-10_2.tif:0018-0920	0.988	478.184	281	844	110.893	148.218	0.462	472.474	18171	3.239	0.309	0.745	0.150821
35	ARL13B_KAN565-10_2.tif:0019-1009	1.534	770.356	294	1716	36.87	162.637	0.403	1181.8	45451	4.722	0.212	0.747	0.377248
36	ARL13B_KAN565-10_2.tif:0020-1027	2.002	1059.74	323	1943	92.429	165.699	0.424	2121.73	81600	3.815	0.262	0.716	0.677289
37	ARL13B_KAN565-10_2.tif:0021-1027	1.17	401.778	319	493	150.473	165.727	0.441	470.108	18080	4.275	0.234	0.726	0.150066
38	ARL13B_KAN565-10_3.tif:0001-0046	0.702	380.185	123	617	163.487	7.498	0.496	266.906	10265	3.549	0.282	0.711	0.0852007
39	ARL13B_KAN565-10_3.tif:0002-0073	1.742	953.791	374	2005	9.392	11.671	0.484	1661.6	63904	4.177	0.239	0.749	0.53041
40	ARL13B_KAN565-10_3.tif:0003-0210	1.716	423.409	261	609	146.508	34.012	0.317	726.614	27945	3.44	0.291	0.552	0.231947
41	ARL13B_KAN565-10_3.tif:0004-0314	4.498	592.249	190	1214	170.463	50.49	0.294	2664.09	102459	5.269	0.19	0.552	0.850421
42	ARL13B_KAN565-10_3.tif:0005-0326	1.066	439.805	127	637	200.062	52.491	0.408	468.86	18032	2.528	0.396	0.661	0.149668
43	ARL13B_KAN565-10_3.tif:0006-0539	5.694	409.205	166	655	77.783	86.847	0.102	2330.16	89616	13.017	0.077	0.465	0.743823
44	ARL13B_KAN565-10_3.tif:0007-0540	2.47	791.642	329	2550	158.774	86.872	0.479	1955.47	75206	3.63	0.275	0.751	0.624218
45	ARL13B_KAN565-10_3.tif:0008-0600	2.756	1759.29	257	6152	152.684	96.774	0.468	4848.9	186485	4.331	0.231	0.803	1.54785
46	ARL13B_KAN565-10_3.tif:0009-0645	1.638	547.19	298	1425	8.279	104.215	0.387	896.352	34473	4.53	0.221	0.643	0.28613
47	ARL13B_KAN565-10_3.tif:0010-0723	1.586	499.295	331	920	223.058	116.855	0.321	791.93	30457	5.102	0.196	0.619	0.252797
48	ARL13B_KAN565-10_3.tif:0011-0873	1.82	736.014	189	1772	178.451	140.905	0.236	1339.63	51521	7.121	0.14	0.583	0.42763
49	ARL13B_KAN565-10_3.tif:0012-0875	1.274	533.755	88	1260	222.902	141.461	0.431	680.045	26154	3.03	0.33	0.645	0.217081
50	ARL13B_KAN565-10_3.tif:0013-0925	1.352	498.192	287	873	145.705	149.187	0.494	673.597	25906	4.396	0.227	0.776	0.215023
51	ARL13B_KAN565-10_4.tif:0001-0033	3.276	593.143	228	1766	136.638	5.392	0.334	1943.25	74736	5.15	0.194	0.653	0.620317
52	ARL13B_KAN565-10_4.tif:0002-0112	3.952	744.546	217	2646	183.741	18.16	0.38	2942.62	113171	5.292	0.189	0.758	0.939332
53	ARL13B_KAN565-10_4.tif:0003-0159	2.678	941.893	242	1845	33.356	25.682	0.356	2522.54	97015	4.61	0.217	0.71	0.805235
54	ARL13B_KAN565-10_4.tif:0004-0208	3.224	1033.49	265	2682	174.631	33.472	0.439	3332.18	128153	4.374	0.229	0.756	1.06368
55	ARL13B_KAN565-10_4.tif:0005-0371	2.21	792.388	166	2460	131.615	59.732	0.463	1751.28	67353	3.362	0.297	0.669	0.559037
56	ARL13B_KAN565-10_4.tif:0006-0377	0.728	585.429	362	1042	22.016	60.688	0.369	426.218	16392	3.737	0.268	0.629	0.136055
57	ARL13B_KAN565-10_4.tif:0007-0475	0.65	410.4	270	578	6.776	76.668	0.49	266.776	10260	3.608	0.277	0.746	0.0851592
58	ARL13B_KAN565-10_4.tif:0008-0570	2.782	865.907	341	2370	135.247	91.963	0.379	2409.1	92652	5.259	0.19	0.679	0.769022
59	ARL13B_KAN565-10_4.tif:0009-0586	3.042	506.94	188	929	51.213	94.435	0.287	1542.2	59312	4.235	0.236	0.532	0.492296
60	ARL13B_KAN565-10_4.tif:0010-0603	1.3	451.06	341	845	10.672	97.263	0.404	586.413	22553	3.92	0.255	0.613	0.187192
61	ARL13B_KAN565-10_4.tif:0011-0718	1.82	440.614	14	772	142.49	115.768	0.249	801.966	30843	4.255	0.235	0.579	0.256
62	ARL13B_KAN565-10_4.tif:0012-0751	2.08	701.962	128	1353	212.314	121.234	0.287	1460.17	56157	7.704	0.13	0.672	0.466109
63	ARL13B_KAN565-10_4.tif:0013-0761	2.184	964.929	336	3718	162.375	122.744	0.457	2107.53	81054	4.168	0.24	0.706	0.672757
64	ARL13B_KAN565-10_4.tif:0014-0819	3.38	482.5	26	1543	112.421	131.674	0.265	1630.95	62725	2.928	0.341	0.482	0.520625
65	ARL13B_KAN565-10_4.tif:0015-0858	0.754	526.241	131	827	38.647	138.55	0.388	396.81	15261	4.045	0.247	0.598	0.126668
66	ARL13B_KAN565-10_4.tif:0016-0883	1.976	965.868	294	3253	207.754	142.407	0.373	1908.67	73406	4.721	0.212	0.752	0.609278
67	ARL13B_KAN565-10_4.tif:0017-0933	1.716	877.758	257	2017	208.55	150.727	0.41	1506.32	57932	3.409	0.293	0.632	0.480842
68	ARL13B_KAN565-10_5.tif:0001-0025	2.34	587.056	351	939	10.535	4.115	0.483	1373.79	52835	4.4	0.227	0.837	0.438536
69	ARL13B_KAN565-10_5.tif:0002-0037	2.548	922.755	172	1814	196.972	6.141	0.312	2351.32	90430	4.23	0.236	0.678	0.750579
70	ARL13B_KAN565-10_5.tif:0003-0119	2.6	443.94	157	784	109.252	19.094	0.333	1154.31	44394	5.888	0.17	0.685	0.368475
71	ARL13B_KAN565-10_5.tif:0004-0127	1.17	413.844	77	1166	206.162	20.617	0.462	484.227	18623	2.794	0.358	0.677	0.154573
72	ARL13B_KAN565-10_5.tif:0005-0168	2.496	1131.78	142	5421	95.734	26.956	0.317	2825.1	108651	2.463	0.406	0.533	0.901816
73	ARL13B_KAN565-10_5.tif:0006-0312	1.56	889.033	272	1729	103.738	50.27	0.474	1386.98	53342	4.933	0.203	0.909	0.442745
74	ARL13B_KAN565-10_5.tif:0007-0440	3.016	561.983	317	1285	137.938	70.91	0.351	1695.04	65190	4.981	0.201	0.684	0.541084
75	ARL13B_KAN565-10_5.tif:0008-0497	2.522	535.835	32	1243	95.391	79.776	0.421	1351.46	51976	3.516	0.284	0.764	0.431407
76	ARL13B_KAN565-10_5.tif:0009-0566	2.262	1056.61	221	2667	127.946	91.318	0.359	2390.19	91925	6.54	0.153	0.809	0.762988
77	ARL13B_KAN565-10_5.tif:0010-0574	3.406	1315.02	77	3983	161.855	92.953	0.429	4479.24	172268	2.433	0.411	0.657	1.42984
78	ARL13B_KAN565-10_5.tif:0011-0606	2.548	579.704	209	1308	181.823	97.698	0.347	1477.17	56811	5.483	0.182	0.626	0.471538
79	ARL13B_KAN565-10_5.tif:0012-0737	1.222	526.809	151	1013	214.368	119.097	0.406	643.799	24760	3.78	0.265	0.696	0.205511
80	ARL13B_KAN565-10_5.tif:0013-0839	2.158	641.289	214	1937	209.16	135.309	0.377	1383.98	53227	5.879	0.17	0.758	0.44179
81	ARL13B_KAN565-10_6.tif:0001-0073	2.886	541.658	192	1133	157.676	11.798	0.31	1563.32	60124	6.301	0.159	0.605	0.499036
82	ARL13B_KAN565-10_6.tif:0002-0094	4.108	876.873	355	2012	136.323	15.279	0.373	3602.41	138546	6.031	0.166	0.773	1.14995
83	ARL13B_KAN565-10_6.tif:0003-0088	1.196	358.935	211	496	36.825	14.008	0.194	429.312	16511	7.014	0.143	0.449	0.137043
84	ARL13B_KAN565-10_6.tif:0004-0098	2.652	517.343	302	865	97.591	15.54	0.445	1372.08	52769	2.571	0.389	0.68	0.437989
85	ARL13B_KAN565-10_6.tif:0005-0113	3.432	687.614	350	1664	121.933	18.16	0.353	2360.03	90765	6.059	0.165	0.679	0.75336
86	ARL13B_KAN565-10_6.tif:0006-0160	2.002	615.13	263	2156	185.656	25.971	0.279	1231.56	47365	4.694	0.213	0.572	0.393135
87	ARL13B_KAN565-10_6.tif:0007-0187	3.458	771.023	147	1749	193.438	30.442	0.492	2666.36	102546	1.993	0.502	0.68	0.851143
88	ARL13B_KAN565-10_6.tif:0008-0230	2.99	714.07	351	1433	222.035	37.184	0.337	2135.2	82118	5.424	0.184	0.669	0.681589
89	ARL13B_KAN565-10_6.tif:0009-0301	1.118	374.14	268	497	24.381	48.782	0.23	418.313	16088	9.076	0.11	0.775	0.133532
90	ARL13B_KAN565-10_6.tif:0010-0341	1.586	645.623	371	1167	211.263	55.088	0.467	1024.02	39383	4.204	0.238	0.782	0.326883
91	ARL13B_KAN565-10_6.tif:0011-0425	2.886	520.919	267	1015	144.982	68.459	0.305	1503.46	57822	6.668	0.15	0.683	0.479929
92	ARL13B_KAN565-10_6.tif:0012-0424	2.652	483.657	164	1395	78.386	68.305	0.412	1282.73	49333	4.81	0.208	0.823	0.409469
93	ARL13B_KAN565-10_6.tif:0013-0434	4.238	660.791	327	1766	166.665	70.077	0.282	2800.6	107709	7.096	0.141	0.64	0.893997
94	ARL13B_KAN565-10_6.tif:0014-0444	2.756	1101.9	122	3561	50.976	71.733	0.478	3037.01	116801	4.176	0.239	0.729	0.969461
95	ARL13B_KAN565-10_6.tif:0015-0466	2.028	808.923	274	1794	203.704	74.932	0.286	1640.6	63096	6.09	0.164	0.578	0.523704
96	ARL13B_KAN565-10_6.tif:0016-0538	3.9	1203.34	325	3110	63.436	86.995	0.456	4693.31	180501	3.842	0.26	0.756	1.49818
97	ARL13B_KAN565-10_6.tif:0017-0549	1.95	478.6	151	878	222.881	88.626	0.391	933.326	35895	3.756	0.266	0.581	0.297933
98	ARL13B_KAN565-10_6.tif:0018-0697	4.394	948.118	157	2666	179.344	112.24	0.424	4166.28	160232	2.293	0.436	0.638	1.32994
99	ARL13B_KAN565-10_6.tif:0019-0814	1.742	673.209	210	1727	102.484	131.266	0.353	1172.8	45105	5.265	0.19	0.615	0.374377
100	ARL13B_KAN565-10_6.tif:0020-0953	1.04	691.5	350	1139	204.848	153.828	0.425	719.203	27660	4.581	0.218	0.708	0.229581
101	ARL13B_KAN565-10_6.tif:0021-0961	1.248	499.833	212	902	25.464	154.813	0.385	623.83	23992	4.714	0.212	0.696	0.199136
										72259.3				0.59976
102	ARL13B_KAN565-11_1.tif:0001-0186	3.406	910.405	61	4301	161.444	30.237	0.329	3101.03	119263	3.309	0.302	0.533	0.989896
103	ARL13B_KAN565-11_1.tif:0002-0273	2.158	994.711	351	2327	101.66	44.024	0.382	2146.72	82561	5.215	0.192	0.709	0.685266
104	ARL13B_KAN565-11_1.tif:0003-0328	2.626	1211.24	260	2915	176.308	52.956	0.477	3180.9	122335	4.258	0.235	0.882	1.01539
105	ARL13B_KAN565-11_1.tif:0004-0362	2.756	1763.41	332	4224	210.871	58.474	0.485	4860.27	186922	4.558	0.219	0.851	1.55147
106	ARL13B_KAN565-11_1.tif:0005-0457	2.938	1168.74	386	2454	220.398	73.564	0.417	3433.97	132068	5.251	0.19	0.831	1.09618
107	ARL13B_KAN565-11_1.tif:0006-0483	3.354	1126.09	361	2391	210.594	78.041	0.343	3777.12	145265	5.987	0.167	0.777	1.20572
108	ARL13B_KAN565-11_1.tif:0007-0486	4.03	1364.95	215	3455	190.815	78.491	0.369	5501.1	211568	5.308	0.188	0.724	1.75604
109	ARL13B_KAN565-11_1.tif:0008-0527	2.912	922.92	350	2317	146.575	85.232	0.343	2687.7	103367	5.309	0.188	0.663	0.857958
110	ARL13B_KAN565-11_1.tif:0009-0543	2.912	1479.85	350	5239	33.628	87.724	0.45	4309.58	165743	4.411	0.227	0.797	1.37569
111	ARL13B_KAN565-11_1.tif:0010-0658	3.64	1879.74	350	5242	176.14	106.448	0.473	6842.65	263163	3.192	0.313	0.714	2.18428
112	ARL13B_KAN565-11_1.tif:0011-0704	2.626	882.545	351	1651	216.962	113.652	0.439	2317.7	89137	4.676	0.214	0.838	0.739847
113	ARL13B_KAN565-11_1.tif:0012-0715	4.108	1972.29	206	5268	122.048	115.255	0.331	8102.63	311621	5.384	0.186	0.687	2.58649
114	ARL13B_KAN565-11_1.tif:0013-0741	2.834	924.963	283	1998	37.038	119.605	0.248	2621.5	100821	8.273	0.121	0.663	0.836826
115	ARL13B_KAN565-11_1.tif:0014-0869	2.522	1515.96	356	3447	51.732	140.31	0.465	3823.48	147048	4.254	0.235	0.752	1.22051
116	ARL13B_KAN565-11_1.tif:0015-0889	1.846	541.141	346	960	22.844	143.527	0.425	999.006	38421	3.585	0.279	0.768	0.318899
117	ARL13B_KAN565-11_1.tif:0016-0955	1.586	1157.08	351	2433	141.862	154.177	0.467	1835.24	70582	4.293	0.233	0.758	0.585839
118	ARL13B_KAN565-11_2.tif:0001-0009	2.964	644.64	175	1496	150.241	1.656	0.218	1910.83	73489	6.326	0.158	0.511	0.609967
119	ARL13B_KAN565-11_2.tif:0002-0044	4.862	1225.94	175	3411	92.355	6.949	0.255	5960.86	229250	8.208	0.122	0.655	1.9028
120	ARL13B_KAN565-11_2.tif:0003-0099	1.534	455.017	306	700	56.895	15.982	0.415	698.038	26846	3.584	0.279	0.694	0.222825
121	ARL13B_KAN565-11_2.tif:0004-0181	1.768	633.118	352	1223	181.793	29.276	0.414	1119.42	43052	2.445	0.409	0.677	0.357336
122	ARL13B_KAN565-11_2.tif:0005-0212	5.694	1100.35	353	2524	30.291	33.992	0.494	6265.78	240977	3.608	0.277	0.823	2.00014
123	ARL13B_KAN565-11_2.tif:0006-0249	1.352	547.981	265	1170	123.111	39.922	0.283	740.915	28495	5.258	0.19	0.556	0.236512
124	ARL13B_KAN565-11_2.tif:0007-0302	6.266	676.917	53	1745	81.68	48.743	0.373	4241.82	163137	3.711	0.269	0.661	1.35406
125	ARL13B_KAN565-11_2.tif:0008-0403	3.822	1650.7	225	5671	90.32	65.084	0.365	6309.36	242653	5.409	0.185	0.673	2.01405
126	ARL13B_KAN565-11_2.tif:0009-0421	0.988	404.658	304	534	47.441	67.763	0.462	399.826	15377	3.411	0.293	0.704	0.127631
127	ARL13B_KAN565-11_2.tif:0010-0432	3.77	597.979	294	1021	136.26	69.876	0.273	2254.52	86707	7.106	0.141	0.621	0.719678
128	ARL13B_KAN565-11_2.tif:0011-0468	3.25	778.856	91	1899	212.419	75.627	0.371	2531.43	97357	5.325	0.188	0.733	0.808074
129	ARL13B_KAN565-11_2.tif:0012-0499	2.002	813.766	364	1747	3.144	80.681	0.37	1629.26	62660	4.852	0.206	0.623	0.520085
130	ARL13B_KAN565-11_2.tif:0013-0515	2.496	740.125	48	1750	70.345	82.563	0.471	1847.46	71052	1.695	0.59	0.708	0.58974
131	ARL13B_KAN565-11_2.tif:0014-0573	4.186	636.696	217	1826	145.14	92.44	0.241	2665.37	102508	4.737	0.211	0.491	0.850828
132	ARL13B_KAN565-11_2.tif:0015-0573	4.29	603.667	352	1331	197.022	92.535	0.334	2589.89	99605	5.879	0.17	0.66	0.826733
133	ARL13B_KAN565-11_2.tif:0016-0596	2.444	551.234	146	1253	86.291	96.271	0.309	1347.3	51816	4.451	0.225	0.712	0.430079
134	ARL13B_KAN565-11_2.tif:0017-0642	2.522	522.928	197	1167	116.473	103.764	0.355	1318.9	50724	4.346	0.23	0.761	0.421015
135	ARL13B_KAN565-11_2.tif:0018-0689	4.03	724.923	281	1415	172.684	111.187	0.425	2921.61	112363	4.855	0.206	0.845	0.932626
136	ARL13B_KAN565-11_2.tif:0019-0721	4.212	688.586	320	1560	86.105	116.663	0.403	2900.5	111551	3.204	0.312	0.651	0.925886
137	ARL13B_KAN565-11_2.tif:0020-0741	3.718	603.783	162	1833	24.064	119.448	0.274	2245	86341	5.486	0.182	0.561	0.71664
138	ARL13B_KAN565-11_2.tif:0021-0745	0.754	451.483	316	726	2.533	120.223	0.38	340.439	13093	3.115	0.321	0.58	0.108673
139	ARL13B_KAN565-11_2.tif:0022-0815	4.836	1297.29	181	3598	110.659	131.161	0.308	6274.07	241296	4.748	0.211	0.639	2.00278
140	ARL13B_KAN565-11_2.tif:0023-0925	1.898	416.151	123	665	139.805	148.771	0.314	789.902	30379	4.256	0.235	0.613	0.252149
141	ARL13B_KAN565-11_3.tif:0001-0044	0.52	422.5	364	481	182.366	7.184	0.254	219.713	8450	7.453	0.134	0.548	0.0701359
142	ARL13B_KAN565-11_3.tif:0002-0136	2.756	671.283	67	1957	130.276	21.953	0.289	1850.17	71156	4.213	0.237	0.504	0.590603
143	ARL13B_KAN565-11_3.tif:0003-0146	4.316	567.301	332	1213	33.706	23.43	0.362	2448.62	94172	5.391	0.185	0.796	0.781638
144	ARL13B_KAN565-11_3.tif:0004-0181	1.144	552.841	175	927	217.537	29.161	0.484	632.488	24325	3.122	0.32	0.721	0.2019
145	ARL13B_KAN565-11_3.tif:0005-0353	3.094	747.176	181	2095	45.078	56.807	0.328	2311.9	88914	5.866	0.17	0.618	0.737996
146	ARL13B_KAN565-11_3.tif:0006-0412	4.342	936.515	75	2770	146.163	66.578	0.292	4066.59	156398	6.325	0.158	0.644	1.29812
147	ARL13B_KAN565-11_3.tif:0007-0459	2.73	630.676	76	1579	213.37	73.872	0.219	1721.85	66221	6.233	0.16	0.485	0.549642
148	ARL13B_KAN565-11_3.tif:0008-0476	6.994	835.357	335	1640	196.726	76.804	0.335	5842.84	224711	5.767	0.173	0.819	1.86513
149	ARL13B_KAN565-11_3.tif:0009-0505	4.628	993.933	242	2758	3.798	81.501	0.35	4600.2	176920	5.106	0.196	0.695	1.46846
150	ARL13B_KAN565-11_3.tif:0010-0554	4.81	757.027	194	1922	154.929	89.159	0.35	3641.52	140050	4.315	0.232	0.605	1.16243
151	ARL13B_KAN565-11_3.tif:0011-0571	4.342	920.365	253	3049	185.562	92.053	0.345	3996.47	153701	5.15	0.194	0.703	1.27574
152	ARL13B_KAN565-11_3.tif:0012-0716	5.2	833.095	341	1765	152.595	115.47	0.495	4332.35	166619	3.823	0.262	0.83	1.38296
153	ARL13B_KAN565-11_3.tif:0013-0743	3.562	852.438	351	1562	18.653	119.791	0.343	3036.57	116784	5.859	0.171	0.743	0.96932
154	ARL13B_KAN565-11_3.tif:0014-0738	3.224	1128.11	253	3611	140.432	119.159	0.377	3637.23	139885	4.965	0.201	0.683	1.16106
155	ARL13B_KAN565-11_3.tif:0015-0739	3.64	758.707	181	2173	174.496	119.281	0.445	2761.86	106219	4.218	0.237	0.854	0.88163
156	ARL13B_KAN565-11_3.tif:0016-0791	0.806	578.258	376	929	3.654	127.749	0.475	466.104	17926	3.766	0.266	0.705	0.148788
157	ARL13B_KAN565-11_3.tif:0017-0867	1.612	669.21	352	1251	62.575	139.734	0.28	1078.83	41491	6.482	0.154	0.626	0.34438
158	ARL13B_KAN565-11_3.tif:0018-0981	4.004	686.396	351	1096	28.147	158.425	0.383	2748.5	105705	5.306	0.188	0.782	0.877363
159	ARL13B_KAN565-11_3.tif:0019-1028	2.444	929.117	241	1942	167.784	165.717	0.379	2270.9	87337	5.236	0.191	0.74	0.724907
160	ARL13B_KAN565-11_4.tif:0001-0022	4.004	644.461	353	1169	10.786	3.531	0.41	2580.58	99247	5.221	0.192	0.77	0.823761
161	ARL13B_KAN565-11_4.tif:0002-0067	2.86	1114.9	149	3276	118.06	10.672	0.455	3188.81	122639	1.992	0.502	0.705	1.01792
162	ARL13B_KAN565-11_4.tif:0003-0087	4.368	896.113	171	2013	103.133	14.095	0.395	3914.46	150547	3.98	0.251	0.719	1.24956
163	ARL13B_KAN565-11_4.tif:0004-0116	4.186	1163.3	263	3755	210.147	18.688	0.457	4869.86	187291	4.515	0.221	0.758	1.55454
164	ARL13B_KAN565-11_4.tif:0005-0228	3.666	1532.91	263	4361	55.157	36.967	0.406	5619.98	216140	4.737	0.211	0.746	1.79399
165	ARL13B_KAN565-11_4.tif:0006-0339	3.848	1149.65	182	3770	204.423	54.949	0.302	4424.14	170149	4.582	0.218	0.61	1.41226
166	ARL13B_KAN565-11_4.tif:0007-0393	6.37	1169.6	207	3113	218.636	63.595	0.351	7450.77	286551	4.905	0.204	0.729	2.37841
167	ARL13B_KAN565-11_4.tif:0008-0404	5.694	1095.05	243	2322	112.669	64.812	0.454	6235.59	239816	2.064	0.484	0.654	1.9905
168	ARL13B_KAN565-11_4.tif:0009-0406	6.396	1282.35	250	4219	148.404	65.388	0.334	8202.43	315459	3.662	0.273	0.639	2.61835
169	ARL13B_KAN565-11_4.tif:0010-0432	4.888	828.229	271	3236	196.588	69.676	0.298	4048.63	155707	3.841	0.26	0.575	1.29239
170	ARL13B_KAN565-11_4.tif:0011-0504	3.042	658.128	85	2058	174.611	81.322	0.431	2002.15	77001	3.588	0.279	0.696	0.639117
171	ARL13B_KAN565-11_4.tif:0012-0609	3.016	1109.16	284	2142	8.988	98.139	0.426	3345.44	128663	4.638	0.216	0.746	1.06792
172	ARL13B_KAN565-11_4.tif:0013-0665	2.756	624.208	166	1762	25.316	107.656	0.293	1720.42	66166	5.233	0.191	0.65	0.549185
173	ARL13B_KAN565-11_4.tif:0014-0721	4.03	859.097	263	2190	111.969	116.5	0.437	3462.37	133160	3.219	0.311	0.703	1.10524
174	ARL13B_KAN565-11_4.tif:0015-0741	4.68	650.894	346	1308	90.481	119.474	0.461	3046.37	117161	3.589	0.279	0.786	0.972449
175	ARL13B_KAN565-11_4.tif:0016-0749	4.368	724.774	136	1929	159.304	120.711	0.335	3166	121762	5.499	0.182	0.664	1.01064
176	ARL13B_KAN565-11_4.tif:0017-0797	3.146	1135.89	102	2787	55.56	128.758	0.281	3573.73	137443	5.58	0.179	0.575	1.14079
177	ARL13B_KAN565-11_4.tif:0018-0863	3.146	970.868	143	2753	100.16	139.367	0.34	3054.53	117475	5.949	0.168	0.742	0.975056
178	ARL13B_KAN565-11_4.tif:0019-0882	3.172	767.008	189	2253	104.594	142.542	0.268	2433.1	93575	4.675	0.214	0.545	0.776683
179	ARL13B_KAN565-11_4.tif:0020-0907	5.278	1096.14	221	3132	141.769	146.407	0.264	5785.79	222517	7.509	0.133	0.711	1.84692
180	ARL13B_KAN565-11_4.tif:0021-0963	2.132	545.549	298	797	11.319	155.351	0.37	1163.18	44735	5.626	0.178	0.722	0.371306
181	ARL13B_KAN565-11_4.tif:0022-1023	2.444	482.84	235	787	142.08	164.918	0.467	1180.13	45387	3.264	0.306	0.712	0.376717
182	ARL13B_KAN565-11_5.tif:0001-0030	5.044	872.438	245	2254	157.504	4.842	0.353	4400.84	169253	4.675	0.214	0.724	1.40482
183	ARL13B_KAN565-11_5.tif:0002-0054	4.966	1110.1	0	3460	201.302	8.929	0.42	5513.09	212029	3.174	0.315	0.73	1.75986
184	ARL13B_KAN565-11_5.tif:0003-0048	4.264	1190.01	129	3740	31.208	7.807	0.264	5074.49	195161	7.172	0.139	0.749	1.61986
185	ARL13B_KAN565-11_5.tif:0004-0093	6.708	1243.12	353	3173	206.092	15.111	0.301	8339.38	320726	7.137	0.14	0.827	2.66206
186	ARL13B_KAN565-11_5.tif:0005-0099	3.718	664.287	343	1179	121.709	16.009	0.426	2469.97	94993	4.376	0.229	0.741	0.788453
187	ARL13B_KAN565-11_5.tif:0006-0160	2.314	518.787	230	978	37.967	25.632	0.314	1200.54	46172	4.5	0.222	0.556	0.383233
188	ARL13B_KAN565-11_5.tif:0007-0182	4.16	927.081	187	2581	194.134	29.392	0.346	3856.89	148333	5.091	0.196	0.788	1.23118
189	ARL13B_KAN565-11_5.tif:0008-0290	3.042	816.376	237	2872	150.888	46.871	0.487	2483.57	95516	3.985	0.251	0.815	0.792794
190	ARL13B_KAN565-11_5.tif:0009-0323	2.418	1025.9	165	3299	40.657	52.213	0.37	2480.78	95409	4.674	0.214	0.618	0.791905
191	ARL13B_KAN565-11_5.tif:0010-0404	2.106	495.099	50	878	92.777	65.397	0.473	1042.74	40103	3.404	0.294	0.779	0.332859
192	ARL13B_KAN565-11_5.tif:0011-0475	4.446	1391.41	353	3842	200.18	76.512	0.47	6186.58	237931	3.755	0.266	0.763	1.97485
193	ARL13B_KAN565-11_5.tif:0012-0588	9.231	798.868	0	2378	90.293	94.088	0.278	7373.99	283598	1.521	0.657	0.548	2.3539
194	ARL13B_KAN565-11_5.tif:0013-0577	3.328	1385.1	356	3642	219.851	93.107	0.453	4609.9	177293	4.948	0.202	0.874	1.47155
195	ARL13B_KAN565-11_5.tif:0014-0644	4.186	842.981	234	1940	41.354	103.753	0.36	3528.93	135720	4.872	0.205	0.739	1.12649
196	ARL13B_KAN565-11_5.tif:0015-0664	1.17	427.378	266	664	223.046	106.782	0.233	500.062	19232	3.579	0.279	0.417	0.159628
197	ARL13B_KAN565-11_5.tif:0016-0676	3.276	575.373	156	1108	147.415	109.093	0.402	1885.04	72497	4.204	0.238	0.752	0.601733
198	ARL13B_KAN565-11_5.tif:0017-0729	4.628	1456.07	144	4402	179.591	117.546	0.393	6739.11	259181	5.277	0.189	0.739	2.15123
199	ARL13B_KAN565-11_5.tif:0018-0786	4.316	1455.51	353	4080	41.501	126.689	0.326	6282.37	241615	5.832	0.171	0.672	2.00543
200	ARL13B_KAN565-11_5.tif:0019-0824	2.34	507.867	319	1050	63.065	132.698	0.361	1188.48	45708	5.536	0.181	0.69	0.379382
201	ARL13B_KAN565-11_5.tif:0020-0825	3.874	1588.15	197	4261	206.869	133.104	0.403	6152.85	236634	6.081	0.164	0.971	1.96409
202	ARL13B_KAN565-11_5.tif:0021-0922	2.21	710.835	127	1738	183.238	148.552	0.265	1571.04	60421	7.653	0.131	0.574	0.501501
203	ARL13B_KAN565-11_5.tif:0022-0970	4.732	1045.75	208	2425	146.047	156.588	0.339	4948.8	190327	6.209	0.161	0.773	1.57974
204	ARL13B_KAN565-11_5.tif:0023-0980	4.55	688.926	336	2275	62.109	158.075	0.307	3134.8	120562	5.81	0.172	0.761	1.00068
205	ARL13B_KAN565-11_5.tif:0024-1013	2.782	653.729	351	1618	12.611	163.175	0.197	1818.78	69949	10.88	0.092	0.594	0.580585
206	ARL13B_KAN565-11_5.tif:0025-1010	2.496	1097.26	169	2981	207.453	163.447	0.292	2738.93	105337	3.8	0.263	0.565	0.874309
207	ARL13B_KAN565-11_6.tif:0001-0090	2.21	788.624	179	2023	125.823	14.631	0.463	1742.96	67033	3.619	0.276	0.752	0.556381
208	ARL13B_KAN565-11_6.tif:0002-0121	0.884	569.706	357	847	24.036	19.578	0.314	503.65	19370	7.165	0.14	0.68	0.160773
209	ARL13B_KAN565-11_6.tif:0003-0183	3.536	1008.22	228	2666	185.33	29.449	0.444	3565.28	137118	4.272	0.234	0.784	1.13809
210	ARL13B_KAN565-11_6.tif:0004-0340	3.692	679.852	128	1202	85.374	54.731	0.375	2510.16	96539	4.811	0.208	0.656	0.801285
211	ARL13B_KAN565-11_6.tif:0005-0464	3.458	939.857	238	2265	40.771	74.825	0.332	3250.22	125001	6.168	0.162	0.7	1.03752
212	ARL13B_KAN565-11_6.tif:0006-0566	4.238	1727.36	202	5077	79.684	91.357	0.361	7321	281560	5.37	0.186	0.709	2.33698
213	ARL13B_KAN565-11_6.tif:0007-0579	2.574	806.444	331	2170	159.92	93.332	0.243	2075.91	79838	7.794	0.128	0.598	0.662664
214	ARL13B_KAN565-11_6.tif:0008-0724	3.77	743.269	128	2022	166.978	116.865	0.243	2802.29	107774	5.831	0.172	0.549	0.894536
215	ARL13B_KAN565-11_6.tif:0009-0732	3.198	1002.76	209	2088	36.543	118.295	0.295	3207.01	123339	3.239	0.309	0.502	1.02373
216	ARL13B_KAN565-11_6.tif:0010-0861	0.832	399.844	253	542	166.022	138.751	0.333	332.69	12795	4.897	0.204	0.696	0.1062
217	ARL13B_KAN565-11_6.tif:0011-0928	3.198	468.504	307	783	139.477	149.738	0.46	1498.37	57626	3.943	0.254	0.764	0.478302
218	ARL13B_KAN565-11_6.tif:0012-0999	1.794	734.754	179	1589	121.532	161.113	0.373	1318.23	50698	5.958	0.168	0.711	0.420799
										125116				1.03848
219	ARL13B_KAN565-12_1.tif:0001-0088	3.016	2252.83	280	6409	92.469	14.278	0.497	6794.94	261328	3.815	0.262	0.748	2.16905
220	ARL13B_KAN565-12_1.tif:0002-0312	3.016	1164.25	42	4036	180.161	50.626	0.383	3511.59	135053	2.444	0.409	0.607	1.12096
221	ARL13B_KAN565-12_1.tif:0003-0392	2.392	614.065	349	1565	81.089	63.045	0.374	1468.93	56494	5.31	0.188	0.727	0.468907
222	ARL13B_KAN565-12_1.tif:0004-0406	2.756	806.434	240	2657	142.197	65.839	0.318	2222.67	85482	5.598	0.179	0.597	0.70951
223	ARL13B_KAN565-12_1.tif:0005-0490	2.548	1234.82	198	2805	129.828	78.827	0.342	3146.5	121012	5.079	0.197	0.718	1.00441
224	ARL13B_KAN565-12_1.tif:0006-0540	2.574	1320.64	118	3607	46.014	87.226	0.353	3399.52	130743	5.297	0.189	0.733	1.08518
225	ARL13B_KAN565-12_1.tif:0007-0678	3.536	1381.17	58	3575	154.328	109.305	0.312	4884.11	187839	6.017	0.166	0.696	1.55908
226	ARL13B_KAN565-12_1.tif:0008-0727	1.69	848.077	306	2043	29.289	117.195	0.457	1433.34	55125	4.587	0.218	0.747	0.457544
227	ARL13B_KAN565-12_1.tif:0009-0780	1.95	1316.65	108	3927	51.754	125.673	0.387	2567.63	98749	4.759	0.21	0.721	0.819628
228	ARL13B_KAN565-12_1.tif:0010-0895	1.612	653.113	226	1642	216.033	144.238	0.344	1052.88	40493	6.362	0.157	0.701	0.336096
229	ARL13B_KAN565-12_2.tif:0001-0180	0.988	281.474	37	480	102.075	29.033	0.324	278.113	10696	2.996	0.334	0.571	0.088778
230	ARL13B_KAN565-12_2.tif:0002-0234	2.002	1064.19	290	2878	176.153	37.863	0.484	2130.65	81943	4.507	0.222	0.895	0.680136
231	ARL13B_KAN565-12_2.tif:0003-0326	2.834	922.477	300	2409	47.854	52.716	0.421	2614.46	100550	4.495	0.222	0.796	0.834576
232	ARL13B_KAN565-12_2.tif:0004-0364	3.094	664	161	1629	208.68	58.85	0.366	2054.54	79016	4.207	0.238	0.665	0.655842
233	ARL13B_KAN565-12_2.tif:0005-0571	3.016	1291.47	0	3985	106.172	92.008	0.434	3895.32	149811	2.007	0.498	0.636	1.24345
234	ARL13B_KAN565-12_2.tif:0006-0603	2.132	1071.09	359	2769	205.716	97.204	0.493	2283.69	87829	3.972	0.252	0.788	0.728991
235	ARL13B_KAN565-12_2.tif:0007-0860	3.198	987.382	68	3076	214.728	138.72	0.315	3157.84	121448	6.971	0.143	0.721	1.00803
236	ARL13B_KAN565-12_2.tif:0008-0944	2.184	1526.63	343	4561	104.198	152.235	0.438	3334.36	128237	4.478	0.223	0.764	1.06438
237	ARL13B_KAN565-12_3.tif:0001-0063	2.756	903.717	327	3152	83.999	10.22	0.374	2490.79	95794	4.978	0.201	0.658	0.795101
238	ARL13B_KAN565-12_3.tif:0002-0210	4.862	741.455	342	1405	185.299	33.983	0.416	3605.17	138652	4.729	0.211	0.803	1.15083
239	ARL13B_KAN565-12_3.tif:0003-0289	4.16	662.062	313	1176	205.992	46.784	0.417	2754.35	105930	5.283	0.189	0.86	0.879231
240	ARL13B_KAN565-12_3.tif:0004-0286	1.742	903.075	252	1979	201.571	46.124	0.365	1573.25	60506	3.283	0.305	0.612	0.502207
241	ARL13B_KAN565-12_3.tif:0005-0290	2.184	782.167	259	1606	68.884	46.786	0.498	1708.36	65702	3.221	0.31	0.781	0.545334
242	ARL13B_KAN565-12_3.tif:0006-0467	5.798	870.812	234	2450	50.051	75.355	0.436	5049.27	194191	3.454	0.289	0.718	1.61181
243	ARL13B_KAN565-12_3.tif:0007-0661	1.352	557.385	273	956	219.988	106.673	0.358	753.629	28984	4.01	0.249	0.738	0.24057
244	ARL13B_KAN565-12_3.tif:0008-0759	1.716	664.636	360	1558	14.769	122.499	0.471	1140.59	43866	3.817	0.262	0.75	0.364093
245	ARL13B_KAN565-12_3.tif:0009-0917	2.73	1303.99	256	2895	218.367	147.816	0.468	3560.11	136919	4.237	0.236	0.742	1.13644
246	ARL13B_KAN565-12_4.tif:0001-0205	3.146	811.959	101	2853	160.587	33.017	0.422	2554.58	98247	4.883	0.205	0.783	0.815461
247	ARL13B_KAN565-12_4.tif:0002-0357	2.028	528.179	167	946	55.611	57.761	0.336	1071.21	41198	2.872	0.348	0.589	0.341948
248	ARL13B_KAN565-12_4.tif:0003-0447	2.834	474.963	257	764	144.959	72.145	0.393	1346.13	51771	4.508	0.222	0.671	0.429705
249	ARL13B_KAN565-12_4.tif:0004-0476	2.938	476.398	0	1059	185.139	77.082	0.246	1399.74	53833	3.152	0.317	0.464	0.44682
250	ARL13B_KAN565-12_4.tif:0005-0598	2.158	695.675	195	2169	208.579	96.291	0.33	1501.36	57741	4.655	0.215	0.541	0.479257
251	ARL13B_KAN565-12_4.tif:0006-0645	2.418	742.366	204	1758	79.528	103.94	0.469	1795.15	69040	2.833	0.353	0.662	0.57304
252	ARL13B_KAN565-12_4.tif:0007-0662	3.848	923.649	315	2317	30.806	106.805	0.492	3554.41	136700	4.564	0.219	0.836	1.13463
253	ARL13B_KAN565-12_4.tif:0008-0668	3.614	1067.3	235	3512	128.573	108.014	0.468	3857.46	148355	3.684	0.271	0.818	1.23136
254	ARL13B_KAN565-12_4.tif:0009-0782	2.418	545.527	303	1155	169.509	125.974	0.311	1319.16	50734	5.399	0.185	0.585	0.421098
255	ARL13B_KAN565-12_4.tif:0010-0824	2.08	967.925	358	1744	31.512	132.84	0.396	2013.4	77434	6.127	0.163	0.812	0.642711
256	ARL13B_KAN565-12_4.tif:0011-0869	3.666	911.894	358	2146	64.901	140.175	0.421	3343.2	128577	5.153	0.194	0.827	1.0672
257	ARL13B_KAN565-12_4.tif:0012-0985	1.248	518.042	254	1065	39.355	158.909	0.277	646.555	24866	5.502	0.182	0.608	0.206391
258	ARL13B_KAN565-12_4.tif:0013-1029	1.222	660.851	350	1458	159.296	166.017	0.413	807.609	31060	5.16	0.194	0.701	0.257801
259	ARL13B_KAN565-12_5.tif:0001-0076	2.158	506.012	321	761	75.534	12.275	0.355	1092.04	41999	5.286	0.189	0.624	0.348596
260	ARL13B_KAN565-12_5.tif:0002-0097	1.222	788.021	211	1832	160.01	15.756	0.452	963.02	37037	3.832	0.261	0.777	0.307411
261	ARL13B_KAN565-12_5.tif:0003-0153	2.86	595.109	61	1615	144.201	24.9	0.291	1702.11	65462	5.581	0.179	0.634	0.543342
262	ARL13B_KAN565-12_5.tif:0004-0174	2.08	976.362	139	2191	51.781	28.243	0.442	2030.96	78109	3.488	0.287	0.675	0.648313
263	ARL13B_KAN565-12_5.tif:0005-0186	1.404	816.648	353	1504	12.153	29.879	0.484	1146.64	44099	3.872	0.258	0.725	0.366027
264	ARL13B_KAN565-12_5.tif:0006-0233	3.328	1591.93	193	4085	85.3	37.898	0.497	5298.26	203767	2.547	0.393	0.709	1.69129
265	ARL13B_KAN565-12_5.tif:0007-0292	1.352	520.962	80	1260	218.77	47.132	0.43	704.382	27090	3.601	0.278	0.68	0.22485
266	ARL13B_KAN565-12_5.tif:0008-0324	1.586	1029.66	261	2424	180.86	52.244	0.401	1633.13	62809	4.41	0.227	0.744	0.521322
267	ARL13B_KAN565-12_5.tif:0009-0421	1.872	1398.5	197	3332	77.631	67.62	0.472	2618.15	100692	3.248	0.308	0.766	0.835755
268	ARL13B_KAN565-12_5.tif:0010-0447	3.484	1622.6	319	5982	142.692	72.159	0.423	5653.47	217428	5.03	0.199	0.827	1.80468
269	ARL13B_KAN565-12_5.tif:0011-0493	1.04	702	378	1308	8.272	79.577	0.456	730.124	28080	4.196	0.238	0.684	0.233067
270	ARL13B_KAN565-12_5.tif:0012-0544	2.47	1266.59	215	3304	193.199	87.695	0.404	3128.66	120326	5.454	0.183	0.809	0.998719
271	ARL13B_KAN565-12_5.tif:0013-0564	1.04	623.375	259	1224	23.905	91.175	0.462	648.349	24935	4.038	0.248	0.69	0.206963
272	ARL13B_KAN565-12_5.tif:0014-0597	3.51	1518.17	135	4269	42.352	96.155	0.411	5329.1	204953	4.051	0.247	0.722	1.70113
273	ARL13B_KAN565-12_5.tif:0015-0645	1.144	444.023	354	721	6.593	104.032	0.347	507.993	19537	4.842	0.207	0.568	0.162159
274	ARL13B_KAN565-12_5.tif:0016-0807	1.56	876.383	221	2398	140.844	130.209	0.493	1367.24	52583	3.571	0.28	0.706	0.436445
275	ARL13B_KAN565-12_5.tif:0017-0848	4.004	1292.23	94	4752	108.112	136.613	0.258	5174.42	199004	5.671	0.176	0.575	1.65176
276	ARL13B_KAN565-12_5.tif:0018-0863	1.014	478.385	356	657	8.478	139.136	0.359	485.111	18657	5.853	0.171	0.716	0.154855
277	ARL13B_KAN565-12_6.tif:0001-0023	0.858	765.182	262	1773	174.651	3.54	0.426	656.566	25251	3.962	0.252	0.635	0.209586
278	ARL13B_KAN565-12_6.tif:0002-0096	3.12	1004.58	308	2846	209.489	15.469	0.447	3134.46	120549	4.123	0.243	0.725	1.00057
279	ARL13B_KAN565-12_6.tif:0003-0179	2.678	926.553	147	2356	134.043	28.908	0.389	2481.46	95435	5.244	0.191	0.736	0.792121
280	ARL13B_KAN565-12_6.tif:0004-0319	1.014	415.795	196	608	166.577	51.614	0.401	421.641	16216	3.545	0.282	0.703	0.134595
281	ARL13B_KAN565-12_6.tif:0005-0395	1.794	982.174	354	1889	19.896	63.531	0.324	1762.13	67770	5.64	0.177	0.645	0.562499
282	ARL13B_KAN565-12_6.tif:0006-0583	3.874	1729.63	177	4411	100.148	94.116	0.359	6700.99	257715	3.941	0.254	0.623	2.13906
283	ARL13B_KAN565-12_6.tif:0007-0629	0.884	584.412	359	1160	54.484	101.388	0.301	516.651	19870	7.276	0.137	0.591	0.164923
284	ARL13B_KAN565-12_6.tif:0008-0874	2.028	1027.78	361	2708	64.944	141.003	0.464	2084.47	80167	4.321	0.231	0.776	0.665395
285	ARL13B_KAN565-12_6.tif:0009-1002	1.04	654.35	360	1235	100.136	161.528	0.443	680.565	26174	4.729	0.211	0.656	0.217247
										89965.1				0.74672
286	ARL13B_KAN565-13_1.tif:0001-0039	3.172	1338.57	336	3063	180.107	6.254	0.499	4246.21	163306	4.044	0.247	0.847	1.35546
287	ARL13B_KAN565-13_1.tif:0002-0076	3.536	506.279	254	1042	212.224	12.383	0.379	1790.31	68854	5.046	0.198	0.71	0.571496
288	ARL13B_KAN565-13_1.tif:0003-0111	3.094	678.639	266	1558	70.052	17.708	0.385	2099.83	80758	4.914	0.204	0.674	0.6703
289	ARL13B_KAN565-13_1.tif:0004-0132	2.574	778	262	1551	202.262	21.338	0.372	2002.69	77022	5.261	0.19	0.759	0.639291
290	ARL13B_KAN565-13_1.tif:0005-0151	0.988	500.026	308	684	2.19	24.094	0.446	494.056	19001	3.331	0.3	0.745	0.15771
291	ARL13B_KAN565-13_1.tif:0006-0163	3.12	834.008	220	2274	26.634	26.405	0.499	2602.26	100081	3.389	0.295	0.8	0.830684
292	ARL13B_KAN565-13_1.tif:0007-0204	3.588	1161.12	110	2925	178.215	32.594	0.275	4166.34	160234	5.673	0.176	0.643	1.32996
293	ARL13B_KAN565-13_1.tif:0008-0212	6.032	1042.65	273	3838	127.775	34.112	0.257	6289.65	241895	8.132	0.123	0.754	2.00776
294	ARL13B_KAN565-13_1.tif:0009-0416	4.784	993.418	146	2375	151.858	67.067	0.452	4752.8	182789	4.093	0.244	0.791	1.51717
295	ARL13B_KAN565-13_1.tif:0010-0453	0.78	1109.1	350	2148	0.796	73.218	0.476	865.15	33273	3.151	0.317	0.779	0.27617
296	ARL13B_KAN565-13_1.tif:0011-0486	2.626	809.98	342	1881	131.852	78.641	0.475	2127.14	81808	3.063	0.326	0.719	0.679016
297	ARL13B_KAN565-13_1.tif:0012-0538	2.86	516.082	149	1101	15.709	86.729	0.427	1476.08	56769	4.336	0.231	0.8	0.471189
298	ARL13B_KAN565-13_1.tif:0013-0544	2.106	755.642	358	1372	112.249	87.827	0.498	1591.48	61207	3.973	0.252	0.794	0.508025
299	ARL13B_KAN565-13_1.tif:0014-0596	2.886	1160.05	310	3212	23.957	96.1	0.394	3348.12	128766	4.88	0.205	0.677	1.06877
300	ARL13B_KAN565-13_1.tif:0015-0679	2.288	563.841	216	1211	194.057	109.274	0.334	1290.15	49618	6.504	0.154	0.793	0.411835
301	ARL13B_KAN565-13_1.tif:0016-0785	1.742	601.03	358	929	163.713	126.537	0.471	1047.06	40269	4.37	0.229	0.822	0.334237
302	ARL13B_KAN565-13_1.tif:0017-0842	2.392	581.109	224	1169	143.057	135.692	0.335	1390.1	53462	5.244	0.191	0.655	0.443741
303	ARL13B_KAN565-13_1.tif:0018-0875	3.848	974.845	235	2259	2.079	141.302	0.283	3751.43	144277	5.035	0.199	0.608	1.19752
304	ARL13B_KAN565-13_1.tif:0019-0887	3.172	800.148	267	2086	40.677	143.076	0.415	2538.22	97618	4.695	0.213	0.699	0.81024
305	ARL13B_KAN565-13_2.tif:0001-0010	4.628	1194.02	287	2854	129.394	1.864	0.305	5526.27	212536	5.641	0.177	0.673	1.76407
306	ARL13B_KAN565-13_2.tif:0002-0048	3.484	1375.64	70	3042	200.646	7.785	0.361	4793.02	184336	4.902	0.204	0.684	1.53001
307	ARL13B_KAN565-13_2.tif:0003-0083	2.496	533.823	349	861	5.323	13.52	0.313	1332.5	51247	7.196	0.139	0.762	0.425356
308	ARL13B_KAN565-13_2.tif:0004-0122	2.002	1229.42	355	4013	69.78	19.785	0.483	2461.44	94665	4.023	0.249	0.748	0.78573
309	ARL13B_KAN565-13_2.tif:0005-0156	3.016	1349.6	350	3876	111.656	25.165	0.482	4070.62	156553	4.542	0.22	0.795	1.29941
310	ARL13B_KAN565-13_2.tif:0006-0180	3.276	1010.4	361	2958	5.326	29.162	0.409	3310.28	127311	4.796	0.209	0.712	1.0567
311	ARL13B_KAN565-13_2.tif:0007-0236	1.898	786.808	381	1764	210.887	38.058	0.31	1493.45	57437	6.498	0.154	0.624	0.476734
312	ARL13B_KAN565-13_2.tif:0008-0275	3.068	687.907	167	1483	47.752	44.239	0.258	2110.62	81173	6.646	0.15	0.607	0.673745
313	ARL13B_KAN565-13_2.tif:0009-0445	2.08	1147.78	254	2786	113.75	71.73	0.388	2387.52	91822	4.31	0.232	0.69	0.762133
314	ARL13B_KAN565-13_2.tif:0010-0453	2.106	1209.57	353	3021	205.477	73.021	0.388	2547.5	97975	5.671	0.176	0.726	0.813204
315	ARL13B_KAN565-13_2.tif:0011-0491	3.068	1182.74	92	3476	155.42	79.138	0.355	3628.86	139563	5.593	0.179	0.787	1.15839
316	ARL13B_KAN565-13_2.tif:0012-0605	1.716	945.97	337	2133	6.719	97.632	0.399	1623.38	62434	5.555	0.18	0.737	0.518209
317	ARL13B_KAN565-13_2.tif:0013-0630	3.016	1069.47	280	3077	111.76	101.678	0.305	3225.73	124059	7.387	0.135	0.672	1.0297
318	ARL13B_KAN565-13_2.tif:0014-0743	1.976	848.342	275	2172	135.966	120.008	0.408	1676.42	64474	4.401	0.227	0.688	0.535141
319	ARL13B_KAN565-13_2.tif:0015-0761	1.95	784.707	356	1543	195.675	122.616	0.292	1530.27	58853	5.551	0.18	0.581	0.488487
320	ARL13B_KAN565-13_2.tif:0016-0817	1.378	398.868	112	920	20.654	131.597	0.124	549.673	21140	12.908	0.077	0.459	0.175464
321	ARL13B_KAN565-13_2.tif:0017-0937	1.612	484.387	346	844	23.371	150.959	0.474	780.879	30032	3.357	0.298	0.752	0.249269
322	ARL13B_KAN565-13_2.tif:0018-0942	1.638	498.905	270	1133	13.467	151.981	0.366	817.255	31431	7.112	0.141	0.977	0.260881
323	ARL13B_KAN565-13_2.tif:0019-0986	2.964	586.281	269	1070	1.338	158.967	0.3	1737.84	66836	5.276	0.19	0.681	0.554746
324	ARL13B_KAN565-13_2.tif:0020-1008	2.782	1253.35	354	2935	158.604	162.652	0.313	3487.02	134108	6.71	0.149	0.697	1.11311
325	ARL13B_KAN565-13_2.tif:0021-1028	2.21	1356.73	350	3044	118.664	165.755	0.361	2998.55	115322	5.885	0.17	0.702	0.957186
326	ARL13B_KAN565-13_3.tif:0001-0077	4.03	946.123	151	2625	89.659	11.882	0.319	3813.1	146649	3.402	0.294	0.565	1.2172
327	ARL13B_KAN565-13_3.tif:0002-0079	1.872	634.486	248	1966	185.128	12.497	0.454	1187.83	45683	2.681	0.373	0.692	0.379174
328	ARL13B_KAN565-13_3.tif:0003-0098	3.016	1177.6	114	4114	51.056	15.729	0.305	3551.87	136602	6.454	0.155	0.688	1.13381
329	ARL13B_KAN565-13_3.tif:0004-0217	3.12	575.358	256	2033	133.977	34.791	0.34	1795.23	69043	5.99	0.167	0.698	0.573065
330	ARL13B_KAN565-13_3.tif:0005-0235	3.588	1549.9	352	4199	71.516	37.768	0.477	5561.37	213886	3.146	0.318	0.738	1.77528
331	ARL13B_KAN565-13_3.tif:0006-0321	1.82	975.9	359	2073	38.159	51.632	0.329	1776.24	68313	3.498	0.286	0.571	0.567006
332	ARL13B_KAN565-13_3.tif:0007-0341	3.302	1144.76	174	3736	164.138	54.922	0.344	3780.21	145384	5.231	0.191	0.624	1.2067
333	ARL13B_KAN565-13_3.tif:0008-0356	0.598	485.348	185	1365	205.737	57.542	0.451	290.255	11163	4.258	0.235	0.719	0.0926542
334	ARL13B_KAN565-13_3.tif:0009-0373	2.964	641.974	284	1587	192.305	60.17	0.265	1902.92	73185	6.989	0.143	0.605	0.607444
335	ARL13B_KAN565-13_3.tif:0010-0397	0.936	337.5	55	731	63.313	63.806	0.461	315.919	12150	2.816	0.355	0.72	0.100846
336	ARL13B_KAN565-13_3.tif:0011-0467	3.068	893.907	275	1908	192.591	75.652	0.298	2742.67	105481	3.604	0.277	0.553	0.875504
337	ARL13B_KAN565-13_3.tif:0012-0464	2.132	661.061	188	1743	220.828	74.875	0.364	1409.47	54207	5.841	0.171	0.719	0.449924
338	ARL13B_KAN565-13_3.tif:0013-0505	2.574	887.879	119	2395	34.995	81.206	0.277	2285.54	87900	3.449	0.29	0.491	0.72958
339	ARL13B_KAN565-13_3.tif:0014-0518	3.588	1208.09	231	4213	180.715	83.473	0.418	4334.88	166716	4.214	0.237	0.756	1.38376
340	ARL13B_KAN565-13_3.tif:0015-0540	2.392	2119.76	357	5142	203.846	87.112	0.489	5070.77	195018	4.253	0.235	0.836	1.61867
341	ARL13B_KAN565-13_3.tif:0016-0554	3.9	1433.5	304	3193	217.639	89.331	0.393	5590.99	215025	5.3	0.189	0.792	1.78473
342	ARL13B_KAN565-13_3.tif:0017-0648	0.572	356.955	201	441	22.941	104.637	0.38	204.19	7853	2.426	0.412	0.564	0.0651808
343	ARL13B_KAN565-13_3.tif:0018-0684	5.356	801.83	115	2331	29.65	109.973	0.29	4294.86	165177	2.735	0.366	0.497	1.37099
344	ARL13B_KAN565-13_3.tif:0019-0685	3.718	1430.08	353	3861	203.226	110.368	0.372	5317.37	204502	4.794	0.209	0.699	1.69739
345	ARL13B_KAN565-13_3.tif:0020-0693	3.016	1192.08	352	3276	144.288	111.914	0.381	3595.52	138281	5.484	0.182	0.756	1.14775
346	ARL13B_KAN565-13_3.tif:0021-0779	3.406	1327.72	134	5321	31.108	125.872	0.375	4522.48	173931	4.824	0.207	0.749	1.44365
347	ARL13B_KAN565-13_3.tif:0022-0845	3.666	904.851	322	2487	138.037	136.361	0.447	3317.38	127584	4.939	0.202	0.881	1.05896
348	ARL13B_KAN565-13_3.tif:0023-0861	2.834	978.651	353	2316	177.275	138.696	0.269	2773.66	106673	7.952	0.126	0.722	0.885398
349	ARL13B_KAN565-13_3.tif:0024-0914	2.626	861.455	354	1906	215.731	147.326	0.295	2262.32	87007	6.412	0.156	0.607	0.722168
350	ARL13B_KAN565-13_4.tif:0001-0030	5.148	1258.41	298	3348	219.294	4.693	0.342	6478.68	249165	5.728	0.175	0.759	2.0681
351	ARL13B_KAN565-13_4.tif:0002-0070	3.536	811.265	100	2104	71.282	11.349	0.299	2868.8	110332	6.842	0.146	0.723	0.915768
352	ARL13B_KAN565-13_4.tif:0003-0076	4.446	940.398	152	2384	151.927	12.08	0.227	4181.26	160808	5.88	0.17	0.55	1.33472
353	ARL13B_KAN565-13_4.tif:0004-0071	3.094	1251.08	357	2953	169.369	11.645	0.378	3871.06	148878	5.43	0.184	0.78	1.2357
354	ARL13B_KAN565-13_4.tif:0005-0108	4.758	1009.2	49	4007	31.538	17.433	0.347	4802.05	184683	3.046	0.328	0.638	1.53289
355	ARL13B_KAN565-13_4.tif:0006-0228	3.198	1069.91	283	3298	80.062	36.633	0.336	3421.78	131599	5.752	0.174	0.719	1.09229
356	ARL13B_KAN565-13_4.tif:0007-0238	4.082	787.274	264	1524	120.917	38.583	0.426	3213.85	123602	4.084	0.245	0.757	1.02591
357	ARL13B_KAN565-13_4.tif:0008-0239	3.146	735.686	353	1311	6.42	38.214	0.253	2314.61	89018	3.764	0.266	0.472	0.738859
358	ARL13B_KAN565-13_4.tif:0009-0251	4.81	2028.81	364	5249	198.233	40.635	0.389	9759.17	375330	5.222	0.191	0.763	3.11528
359	ARL13B_KAN565-13_4.tif:0010-0276	3.042	554.786	235	1143	174.147	44.748	0.249	1687.76	64910	4.346	0.23	0.508	0.53876
360	ARL13B_KAN565-13_4.tif:0011-0281	3.25	900.896	324	2131	111.897	45.236	0.442	2928.09	112612	3.871	0.258	0.749	0.934692
361	ARL13B_KAN565-13_4.tif:0012-0310	4.056	809.756	301	1940	21.39	50.257	0.259	3284.57	126322	7.606	0.131	0.646	1.04849
362	ARL13B_KAN565-13_4.tif:0013-0369	2.6	710.31	176	1493	154.977	59.611	0.434	1846.92	71031	4.716	0.212	0.81	0.589565
363	ARL13B_KAN565-13_4.tif:0014-0459	2.73	977.438	192	2823	204.515	73.927	0.318	2668.57	102631	6.164	0.162	0.675	0.851849
364	ARL13B_KAN565-13_4.tif:0015-0491	3.224	730.919	211	1631	68.547	79.31	0.369	2356.63	90634	6.129	0.163	0.838	0.752272
365	ARL13B_KAN565-13_4.tif:0016-0590	3.38	1533.25	311	4682	156.083	95.31	0.427	5182.71	199323	4.384	0.228	0.674	1.6544
366	ARL13B_KAN565-13_4.tif:0017-0636	5.278	886	168	2688	175.651	102.681	0.263	4676.59	179858	6.324	0.158	0.624	1.49284
367	ARL13B_KAN565-13_4.tif:0018-0640	2.392	1181.6	388	2565	125.163	103.291	0.394	2826.55	108707	5.51	0.182	0.739	0.90228
368	ARL13B_KAN565-13_4.tif:0019-0661	2.6	629.22	325	1335	146.465	106.512	0.304	1636.07	62922	4.711	0.212	0.56	0.52226
369	ARL13B_KAN565-13_4.tif:0020-0689	1.534	642.339	284	1291	211.837	111.083	0.402	985.407	37898	5.021	0.199	0.781	0.314558
370	ARL13B_KAN565-13_4.tif:0021-0689	2.678	1009.72	82	3362	50.986	111.223	0.255	2704.19	104001	6.957	0.144	0.648	0.86322
371	ARL13B_KAN565-13_4.tif:0022-0708	1.04	537.35	209	1507	212.62	114.363	0.479	558.878	21494	2.641	0.379	0.721	0.178403
372	ARL13B_KAN565-13_4.tif:0023-0775	3.38	1197.16	0	3305	15.357	124.836	0.288	4046.65	155631	5.229	0.191	0.622	1.29175
373	ARL13B_KAN565-13_4.tif:0024-0793	8.789	742.251	0	2464	133.786	128.292	0.176	6523.3	250881	1.585	0.631	0.356	2.08234
374	ARL13B_KAN565-13_4.tif:0025-0823	3.172	1120.31	102	2981	89.536	132.545	0.364	3553.84	136678	5.868	0.17	0.78	1.13444
375	ARL13B_KAN565-13_4.tif:0026-0878	2.574	933.394	235	2577	41.571	141.805	0.321	2402.7	92406	4.375	0.229	0.586	0.76698
376	ARL13B_KAN565-13_4.tif:0027-0922	4.03	886.742	351	1974	50.057	148.777	0.395	3573.78	137445	5.441	0.184	0.791	1.14081
377	ARL13B_KAN565-13_4.tif:0028-0934	1.352	698.462	352	1267	107.34	150.598	0.385	944.377	36320	4.715	0.212	0.642	0.30146
378	ARL13B_KAN565-13_4.tif:0029-0953	4.212	1229.18	293	2747	133.408	153.487	0.412	5177.61	199127	3.7	0.27	0.77	1.65278
379	ARL13B_KAN565-13_4.tif:0030-0968	2.08	881.888	376	2203	146.357	156.277	0.395	1834.44	70551	5.27	0.19	0.661	0.585581
380	ARL13B_KAN565-13_5.tif:0001-0012	3.614	847.129	31	1893	7.272	1.898	0.304	3061.71	117751	2.131	0.469	0.531	0.977347
381	ARL13B_KAN565-13_5.tif:0002-0173	1.612	494.597	246	819	149.955	27.514	0.459	797.338	30665	2.266	0.441	0.678	0.254523
382	ARL13B_KAN565-13_5.tif:0003-0181	5.408	1652.4	155	5461	63.943	28.919	0.435	8936.74	343700	2.646	0.378	0.641	2.85275
383	ARL13B_KAN565-13_5.tif:0004-0218	3.978	898.34	326	1994	127.079	34.944	0.332	3573.81	137446	5.787	0.173	0.769	1.14082
384	ARL13B_KAN565-13_5.tif:0005-0277	3.224	701.371	350	1348	39.569	44.757	0.341	2261.36	86970	6.365	0.157	0.773	0.721861
385	ARL13B_KAN565-13_5.tif:0006-0336	0.91	459.457	287	659	1.407	54.394	0.339	418.131	16081	4.007	0.25	0.511	0.133474
386	ARL13B_KAN565-13_5.tif:0007-0383	2.314	1180.17	165	4141	160.137	61.729	0.428	2731.07	105035	3.972	0.252	0.677	0.871802
387	ARL13B_KAN565-13_5.tif:0008-0485	5.122	2234.36	102	8731	149.804	78.168	0.361	11445.1	440169	3.65	0.274	0.622	3.65345
388	ARL13B_KAN565-13_5.tif:0009-0501	2.704	744.433	351	1684	44.162	80.971	0.438	2013.07	77421	4.66	0.215	0.768	0.642603
389	ARL13B_KAN565-13_5.tif:0010-0543	4.81	1571.99	276	5755	67.148	87.483	0.348	7561.75	290819	6.119	0.163	0.703	2.41383
390	ARL13B_KAN565-13_5.tif:0011-0650	3.744	953.319	222	2819	95.908	104.946	0.375	3569.44	137278	5.112	0.196	0.718	1.13942
391	ARL13B_KAN565-13_5.tif:0012-0752	0.52	340.75	195	398	166.692	121.462	0.472	177.201	6815	3.319	0.301	0.8	0.0565653
392	ARL13B_KAN565-13_5.tif:0013-0912	4.212	959.988	313	4054	72.111	146.777	0.272	4043.71	155518	5.342	0.187	0.574	1.29082
393	ARL13B_KAN565-13_5.tif:0014-0965	4.108	1469.19	47	3648	169.577	155.733	0.292	6035.8	232132	6.228	0.161	0.726	1.92672
394	ARL13B_KAN565-13_5.tif:0015-0966	1.638	991.032	351	2217	89.114	155.843	0.413	1623.41	62435	5.643	0.177	0.741	0.518218
395	ARL13B_KAN565-13_6.tif:0001-0095	3.51	1036.12	199	3507	70.875	15.16	0.353	3636.99	139876	4.815	0.208	0.769	1.16099
396	ARL13B_KAN565-13_6.tif:0002-0281	2.444	1160.1	356	3424	169.259	45.246	0.444	2835.45	109049	4.301	0.232	0.704	0.905119
397	ARL13B_KAN565-13_6.tif:0003-0344	4.55	1924.05	149	5816	123.496	55.435	0.363	8754.93	336708	3.481	0.287	0.66	2.79471
398	ARL13B_KAN565-13_6.tif:0004-0489	3.458	1048.25	350	2358	222.442	78.731	0.277	3625.06	139417	7.81	0.128	0.745	1.15718
399	ARL13B_KAN565-13_6.tif:0005-0486	2.444	789.415	245	1662	16.542	78.462	0.407	1929.45	74205	5.891	0.17	0.755	0.61591
400	ARL13B_KAN565-13_6.tif:0006-0500	1.846	750.465	138	1666	186.429	80.812	0.398	1385.44	53283	3.255	0.307	0.594	0.442255
401	ARL13B_KAN565-13_6.tif:0007-0662	1.794	1050.39	349	2732	210.993	106.95	0.488	1884.52	72477	3.207	0.312	0.784	0.601567
402	ARL13B_KAN565-13_6.tif:0008-0693	4.628	1672.52	175	5073	124.555	111.802	0.347	7740.9	297709	4.034	0.248	0.619	2.47102
403	ARL13B_KAN565-13_6.tif:0009-0691	3.016	865.302	354	2306	68.794	111.371	0.426	2609.91	100375	4.73	0.211	0.771	0.833124
404	ARL13B_KAN565-13_6.tif:0010-0809	3.432	744.894	299	1326	30.379	130.401	0.356	2556.63	98326	4.498	0.222	0.68	0.816117
405	ARL13B_KAN565-13_6.tif:0011-0813	3.484	838.127	142	2359	58.03	131.26	0.37	2920.21	112309	5.088	0.197	0.703	0.932177
406	ARL13B_KAN565-13_6.tif:0012-0948	1.664	1078.5	358	2001	218.882	152.83	0.388	1794.73	69024	5.733	0.174	0.81	0.572907
407	ARL13B_KAN565-13_6.tif:0013-0999	2.652	627.314	316	1348	10.704	161.339	0.17	1663.74	63986	12.166	0.082	0.551	0.531091
408	ARL13B_KAN565-13_6.tif:0014-1006	2.782	1066.53	352	3112	198.396	162.003	0.363	2967.27	114119	4.916	0.203	0.671	0.947201
										118355				0.982357

## Sheet: KAN566
	Label	Area	Mean	Min	Max	X	Y	Circ	IntDen	RawIntDen	AR	Round	Solidity						Label	Area	Mean	Min	Max	X	Y	Circ	IntDen	RawIntDen	AR	Round	Solidity
536	ARL13B_KAN566-1_1.tif:0001-0068	2.808	637.954	74	1183	220.986	11.032	0.27	1791.48	68899	7.012	0.143	0.624	0.798459
537	ARL13B_KAN566-1_1.tif:0002-0071	2.574	977.061	352	2814	143.249	11.417	0.566	2515.11	96729	2.945	0.34	0.808	1.12098
538	ARL13B_KAN566-1_1.tif:0003-0108	2.314	695.607	236	1507	20.766	17.691	0.305	1609.73	61909	5.174	0.193	0.654	0.717453
539	ARL13B_KAN566-1_1.tif:0004-0133	3.51	860.948	197	3255	104.185	21.523	0.428	3022.11	116228	4.997	0.2	0.833	1.34695
540	ARL13B_KAN566-1_1.tif:0005-0150	1.95	1163.08	349	3416	128.707	24.146	0.507	2268.14	87231	3.411	0.293	0.743	1.01091
541	ARL13B_KAN566-1_1.tif:0006-0246	2.756	889.434	310	2409	165.802	39.598	0.355	2451.43	94280	5.45	0.183	0.714	1.0926
542	ARL13B_KAN566-1_1.tif:0007-0246	2.6	1184.28	235	4087	43.312	39.797	0.407	3079.31	118428	4.396	0.227	0.725	1.37244
543	ARL13B_KAN566-1_1.tif:0008-0255	1.508	948.017	355	2017	174.453	41.044	0.569	1429.7	54985	2.428	0.412	0.753	0.637212
544	ARL13B_KAN566-1_1.tif:0009-0279	1.508	915.534	365	1908	173.869	45.08	0.41	1380.71	53101	5.554	0.18	0.779	0.615379
545	ARL13B_KAN566-1_1.tif:0010-0309	0.936	706.306	266	1792	91.841	49.898	0.548	661.142	25427	2.533	0.395	0.791	0.294669
546	ARL13B_KAN566-1_1.tif:0011-0310	2.392	667.609	319	1610	171.021	50.249	0.489	1597.02	61420	3.451	0.29	0.773	0.711787
547	ARL13B_KAN566-1_1.tif:0012-0323	0.572	506.727	352	829	92.953	52.062	0.582	289.865	11148	3.433	0.291	0.759	0.129192
548	ARL13B_KAN566-1_1.tif:0013-0348	2.028	523.692	113	1155	40.745	56.14	0.212	1062.11	40848	8.333	0.12	0.508	0.473381
549	ARL13B_KAN566-1_1.tif:0014-0376	3.38	1352.94	280	3995	167.252	60.6	0.285	4573.21	175882	7.115	0.141	0.675	2.03827
550	ARL13B_KAN566-1_1.tif:0015-0381	1.924	1234.35	374	3077	74.569	61.367	0.482	2375.03	91342	4.23	0.236	0.759	1.05855
551	ARL13B_KAN566-1_1.tif:0016-0398	2.028	732.487	363	1556	2.032	64.283	0.372	1485.57	57134	5.68	0.176	0.739	0.662117
552	ARL13B_KAN566-1_1.tif:0017-0427	2.886	824.171	350	2723	202.359	69.048	0.278	2378.7	91483	5.029	0.199	0.592	1.06018
553	ARL13B_KAN566-1_1.tif:0018-0449	2.184	2339.23	384	5210	160.117	72.476	0.581	5109.18	196495	3.178	0.315	0.816	2.27715
554	ARL13B_KAN566-1_1.tif:0019-0473	2.652	1275.76	339	3599	47.602	76.42	0.306	3383.51	130127	7.412	0.135	0.721	1.50802
555	ARL13B_KAN566-1_1.tif:0020-0574	0.936	394.75	250	555	180.381	92.607	0.596	369.508	14211	1.641	0.61	0.758	0.164689
556	ARL13B_KAN566-1_1.tif:0021-0674	2.08	1722.08	365	5337	63.78	108.707	0.429	3582.13	137766	5.119	0.195	0.773	1.59655
557	ARL13B_KAN566-1_1.tif:0022-0755	2.106	364.691	241	471	203.843	121.775	0.525	768.086	29540	2.847	0.351	0.779	0.342334
558	ARL13B_KAN566-1_1.tif:0023-0769	1.768	665.809	364	1553	4.709	123.918	0.295	1177.22	45275	7.885	0.127	0.708	0.524685
559	ARL13B_KAN566-1_1.tif:0024-0793	1.638	675.587	351	1298	47.439	127.727	0.319	1106.68	42562	6.967	0.144	0.656	0.493244
560	ARL13B_KAN566-1_1.tif:0025-0805	2.73	1472.22	51	3910	89.954	129.956	0.446	4019.4	154583	4.285	0.233	0.792	1.79144
561	ARL13B_KAN566-1_1.tif:0026-0929	1.95	988.36	368	2146	109.496	149.903	0.346	1927.42	74127	6.058	0.165	0.725	0.859046
562	ARL13B_KAN566-1_1.tif:0027-0939	1.04	911.975	366	1907	180.378	151.365	0.497	948.511	36479	3.974	0.252	0.769	0.422749
563	ARL13B_KAN566-1_1.tif:0028-1027	0.676	526.154	390	852	85.661	165.573	0.399	355.701	13680	5.277	0.19	0.675	0.158535
564	ARL13B_KAN566-1_2.tif:0001-0031	2.782	496.505	232	792	94.499	5.194	0.34	1381.36	53126	4.527	0.221	0.598	0.615669
565	ARL13B_KAN566-1_2.tif:0002-0036	2.782	1610.3	336	4777	116.67	5.89	0.529	4480.12	172302	3.773	0.265	0.823	1.99678
566	ARL13B_KAN566-1_2.tif:0003-0083	4.836	761.156	350	1234	195.139	13.175	0.541	3681.17	141575	3.778	0.265	0.834	1.64069
567	ARL13B_KAN566-1_2.tif:0004-0159	3.406	836.618	354	2100	33.159	25.743	0.537	2849.69	109597	3.467	0.288	0.796	1.2701
568	ARL13B_KAN566-1_2.tif:0005-0266	0.806	427.258	223	734	219.266	42.713	0.484	344.391	13245	2.261	0.442	0.626	0.153494
569	ARL13B_KAN566-1_2.tif:0006-0299	3.406	591.786	358	975	183.267	48.24	0.426	2015.74	77524	4.659	0.215	0.751	0.898413
570	ARL13B_KAN566-1_2.tif:0007-0330	3.458	1100.22	362	2820	51.852	53.174	0.517	3804.78	146329	3.102	0.322	0.762	1.69578
571	ARL13B_KAN566-1_2.tif:0008-0444	2.782	1149.01	355	4057	104.944	71.584	0.262	3196.74	122944	7.527	0.133	0.626	1.42478
572	ARL13B_KAN566-1_2.tif:0009-0507	2.678	746.99	175	2288	180.566	81.47	0.482	2000.56	76940	3.246	0.308	0.749	0.891645
573	ARL13B_KAN566-1_2.tif:0010-0534	2.652	840.843	323	2036	91.569	86.179	0.285	2230.05	85766	7.679	0.13	0.761	0.993928
574	ARL13B_KAN566-1_2.tif:0011-0546	0.962	608.676	250	1276	63.661	88.398	0.269	585.581	22521	6.179	0.162	0.612	0.260992
575	ARL13B_KAN566-1_2.tif:0012-0717	3.146	866.702	206	2805	150.475	115.79	0.253	2726.81	104871	7.766	0.129	0.658	1.21533
576	ARL13B_KAN566-1_2.tif:0013-0787	1.04	496.125	202	795	19.435	127.089	0.217	516.001	19845	8.032	0.125	0.602	0.229981
577	ARL13B_KAN566-1_2.tif:0014-0823	1.17	434.511	203	843	72.195	132.761	0.25	508.409	19553	5.485	0.182	0.545	0.226597
578	ARL13B_KAN566-1_2.tif:0015-0902	2.444	1258.65	153	3344	121.365	145.641	0.406	3076.32	118313	4.789	0.209	0.77	1.37111
579	ARL13B_KAN566-1_2.tif:0016-0958	2.86	831.645	126	2100	71.909	154.582	0.3	2378.65	91481	5.843	0.171	0.595	1.06016
580	ARL13B_KAN566-1_2.tif:0017-1022	2.392	1033.21	364	2330	23.606	164.918	0.335	2471.58	95055	6.795	0.147	0.742	1.10158
581	ARL13B_KAN566-1_3.tif:0001-0029	2.08	913.712	353	1947	131.048	4.801	0.481	1900.64	73097	3.913	0.256	0.755	0.847109
582	ARL13B_KAN566-1_3.tif:0002-0107	1.95	1035.13	352	2337	212.584	17.386	0.378	2018.63	77635	5.634	0.177	0.685	0.8997
583	ARL13B_KAN566-1_3.tif:0003-0159	2.366	966.747	181	2832	174.783	25.494	0.426	2287.46	87974	3.557	0.281	0.7	1.01952
584	ARL13B_KAN566-1_3.tif:0004-0188	0.806	661.29	365	1164	12.559	30.219	0.446	533.032	20500	4.369	0.229	0.756	0.237571
585	ARL13B_KAN566-1_3.tif:0005-0312	2.938	1020.85	312	2981	133.33	50.472	0.416	2999.44	115356	4.464	0.224	0.727	1.33684
586	ARL13B_KAN566-1_3.tif:0006-0377	2.522	890.34	272	2702	171.499	60.724	0.44	2245.57	86363	4.288	0.233	0.727	1.00085
587	ARL13B_KAN566-1_3.tif:0007-0411	2.262	687.402	158	1148	5.637	66.499	0.344	1555	59804	5.848	0.171	0.747	0.693059
588	ARL13B_KAN566-1_3.tif:0008-0448	2.184	736.774	166	1605	81.218	72.242	0.245	1609.21	61889	5.042	0.198	0.494	0.717222
589	ARL13B_KAN566-1_3.tif:0009-0453	3.614	620.388	334	1324	72.243	73.082	0.484	2242.22	86234	4.046	0.247	0.792	0.999352
590	ARL13B_KAN566-1_3.tif:0010-0455	2.392	683.793	336	1713	18.582	73.434	0.371	1635.73	62909	5.841	0.171	0.767	0.729042
591	ARL13B_KAN566-1_3.tif:0011-0480	2.834	680.523	149	1735	208.241	77.347	0.23	1928.72	74177	8.171	0.122	0.599	0.859625
592	ARL13B_KAN566-1_3.tif:0012-0571	2.184	521.464	178	1292	31.121	91.888	0.191	1138.95	43803	8.791	0.114	0.523	0.507626
593	ARL13B_KAN566-1_3.tif:0013-0619	2.132	1096.13	250	2705	92.386	99.763	0.355	2337.1	89883	5.775	0.173	0.672	1.04164
594	ARL13B_KAN566-1_3.tif:0014-0630	1.872	880.889	232	2305	50.939	101.704	0.375	1649.12	63424	5.169	0.193	0.67	0.735011
595	ARL13B_KAN566-1_3.tif:0015-0696	2.574	1070.71	140	2348	184.303	112.013	0.372	2756.17	106000	4.676	0.214	0.776	1.22842
596	ARL13B_KAN566-1_3.tif:0016-0716	2.86	1447.86	195	3735	129.172	115.496	0.405	4141.11	159264	5.167	0.194	0.748	1.84568
597	ARL13B_KAN566-1_3.tif:0017-0720	2.626	784.525	138	1905	157.721	116.058	0.285	2060.29	79237	5.866	0.17	0.596	0.918265
598	ARL13B_KAN566-1_3.tif:0018-0744	3.302	1283.52	186	3128	66.743	119.949	0.36	4238.44	163007	6.134	0.163	0.765	1.88906
599	ARL13B_KAN566-1_3.tif:0019-0842	3.38	1183.48	181	2697	51.994	135.501	0.276	4000.42	153853	7.215	0.139	0.71	1.78298
600	ARL13B_KAN566-1_3.tif:0020-0845	1.924	938.878	361	1731	94.954	136.241	0.384	1806.51	69477	4.554	0.22	0.688	0.805158
601	ARL13B_KAN566-1_3.tif:0021-0903	1.274	441.755	302	579	41.861	145.607	0.394	562.83	21646	4.971	0.201	0.766	0.250852
602	ARL13B_KAN566-1_3.tif:0022-0946	2.834	1089.65	306	2472	51.185	152.512	0.431	3088.26	118772	4.866	0.205	0.823	1.37643
603	ARL13B_KAN566-1_3.tif:0023-1003	3.068	912.034	144	2604	108.544	161.712	0.334	2798.29	107620	6.865	0.146	0.749	1.24719
604	ARL13B_KAN566-1_4.tif:0001-0041	2.444	1423.63	286	5009	128.405	6.455	0.569	3479.56	133821	3.027	0.33	0.825	1.55083
605	ARL13B_KAN566-1_4.tif:0002-0074	3.146	1400.1	358	5208	64.367	11.671	0.401	4404.98	169412	4.434	0.226	0.72	1.96329
606	ARL13B_KAN566-1_4.tif:0003-0086	0.806	519.258	341	789	21.943	13.849	0.29	418.547	16097	7.229	0.138	0.674	0.186546
607	ARL13B_KAN566-1_4.tif:0004-0171	1.118	574.349	183	1333	89.668	27.677	0.444	642.161	24697	4.108	0.243	0.699	0.28621
608	ARL13B_KAN566-1_4.tif:0005-0291	2.6	911.19	329	1943	211.995	46.846	0.329	2369.24	91119	4.83	0.207	0.678	1.05596
609	ARL13B_KAN566-1_4.tif:0006-0336	2.054	1195.52	180	3639	54.336	54.248	0.351	2455.74	94446	4.894	0.204	0.705	1.09452
610	ARL13B_KAN566-1_4.tif:0007-0368	1.716	828.924	297	1865	145.101	59.32	0.57	1422.52	54709	3.609	0.277	0.857	0.634014
611	ARL13B_KAN566-1_4.tif:0008-0385	3.9	905.34	135	2701	206.915	62.212	0.486	3531.04	135801	3.811	0.262	0.783	1.57378
612	ARL13B_KAN566-1_4.tif:0009-0387	3.016	1186.35	168	3315	76.345	62.515	0.397	3578.26	137617	4.627	0.216	0.727	1.59482
613	ARL13B_KAN566-1_4.tif:0010-0441	1.04	369.6	111	706	112.544	71.196	0.368	384.407	14784	5.055	0.198	0.678	0.171329
614	ARL13B_KAN566-1_4.tif:0011-0514	1.404	617.87	168	1168	213.516	82.88	0.335	867.542	33365	7.101	0.141	0.697	0.386662
615	ARL13B_KAN566-1_4.tif:0012-0622	2.314	1115.33	240	2580	85.559	100.456	0.313	2581.02	99264	7.658	0.131	0.706	1.15035
616	ARL13B_KAN566-1_4.tif:0013-0739	3.874	859.215	278	2431	135.106	119.348	0.429	3328.8	128023	4.761	0.21	0.78	1.48364
617	ARL13B_KAN566-1_4.tif:0014-0738	2.73	856.971	40	2645	193.756	118.9	0.289	2339.67	89982	5.623	0.178	0.532	1.04279
618	ARL13B_KAN566-1_4.tif:0015-0781	4.576	1575.2	354	3712	44.873	126.014	0.549	7208.57	277236	3.569	0.28	0.84	3.21284
619	ARL13B_KAN566-1_4.tif:0016-0831	2.054	573.38	121	1034	17.745	134.167	0.391	1177.79	45297	4.83	0.207	0.684	0.52494
620	ARL13B_KAN566-1_4.tif:0017-0890	4.368	1401.62	169	3775	106.034	143.388	0.359	6122.67	235473	5.245	0.191	0.75	2.72886
621	ARL13B_KAN566-1_4.tif:0018-0895	2.912	1363.37	361	3157	87.812	144.49	0.36	3970.36	152697	5.682	0.176	0.754	1.76958
622	ARL13B_KAN566-1_4.tif:0019-0999	0.65	367.48	203	497	150.095	161.079	0.233	238.876	9187	9.266	0.108	0.588	0.106467
623	ARL13B_KAN566-1_4.tif:0020-1026	1.196	568.913	283	1021	208.114	165.145	0.273	680.461	26170	4.051	0.247	0.477	0.30328
624	ARL13B_KAN566-1_5.tif:0001-0047	2.184	759.179	221	1718	51.498	7.565	0.336	1658.15	63771	5.931	0.169	0.706	0.739032
625	ARL13B_KAN566-1_5.tif:0002-0071	2.314	851.011	350	1709	103.165	11.595	0.337	1969.36	75740	5.341	0.187	0.652	0.877739
626	ARL13B_KAN566-1_5.tif:0003-0103	3.458	694.248	221	2174	133.04	16.498	0.275	2400.86	92335	3.887	0.257	0.501	1.07006
627	ARL13B_KAN566-1_5.tif:0004-0130	0.858	536.909	353	1214	198.687	21.151	0.341	460.696	17718	5.653	0.177	0.541	0.205331
628	ARL13B_KAN566-1_5.tif:0005-0144	3.354	1152.1	350	2465	30.929	23.328	0.582	3864.38	148621	3.206	0.312	0.832	1.72234
629	ARL13B_KAN566-1_5.tif:0006-0190	2.158	650.53	350	1302	94.414	30.59	0.524	1403.93	53994	3.006	0.333	0.798	0.625728
630	ARL13B_KAN566-1_5.tif:0007-0202	2.678	760.32	305	1789	222.858	32.345	0.222	2036.26	78313	7.501	0.133	0.58	0.907557
631	ARL13B_KAN566-1_5.tif:0008-0233	2.054	1381.03	281	4164	165.358	37.707	0.45	2836.8	109101	4.364	0.229	0.794	1.26435
632	ARL13B_KAN566-1_5.tif:0009-0286	2.886	1144.18	354	2848	69.807	45.896	0.372	3302.3	127004	5.052	0.198	0.675	1.47183
633	ARL13B_KAN566-1_5.tif:0010-0311	3.224	1602.37	0	4243	150.342	50.146	0.578	5166.35	198694	1.528	0.654	0.752	2.30263
634	ARL13B_KAN566-1_5.tif:0011-0348	1.664	503.031	45	1008	3.379	56.065	0.347	837.094	32194	6.212	0.161	0.757	0.373091
635	ARL13B_KAN566-1_5.tif:0012-0372	1.222	513.83	219	1066	196.891	60.072	0.446	627.938	24150	4.034	0.248	0.676	0.27987
636	ARL13B_KAN566-1_5.tif:0013-0434	2.366	883.473	363	1746	71.64	70.168	0.332	2090.42	80396	5.631	0.178	0.655	0.931696
637	ARL13B_KAN566-1_5.tif:0014-0534	3.926	993.795	138	3037	160.57	86.171	0.284	3901.87	150063	6.294	0.159	0.643	1.73906
638	ARL13B_KAN566-1_5.tif:0015-0529	2.028	679.449	80	1705	190.651	85.454	0.352	1378.01	52997	4.312	0.232	0.624	0.614174
639	ARL13B_KAN566-1_5.tif:0016-0554	2.34	657.689	366	1152	13.36	89.325	0.275	1539.09	59192	7.86	0.127	0.814	0.685967
640	ARL13B_KAN566-1_5.tif:0017-0572	2.782	1070.19	196	3807	136.149	92.329	0.397	2977.44	114510	4.522	0.221	0.677	1.32704
641	ARL13B_KAN566-1_5.tif:0018-0590	2.886	821.964	160	1770	212.768	95.411	0.27	2372.33	91238	6.419	0.156	0.608	1.05734
642	ARL13B_KAN566-1_5.tif:0019-0649	2.21	926.941	350	2168	109.275	104.55	0.302	2048.66	78790	6.47	0.155	0.675	0.913085
643	ARL13B_KAN566-1_5.tif:0020-0699	3.302	760.087	222	1789	73.792	112.788	0.54	2509.96	96531	3.28	0.305	0.87	1.11868
644	ARL13B_KAN566-1_5.tif:0021-0849	2.678	1218.72	345	4393	141.6	136.983	0.327	3263.93	125528	6.617	0.151	0.684	1.45472
645	ARL13B_KAN566-1_5.tif:0022-1017	1.482	774.789	350	2061	181.524	164.111	0.215	1148.31	44163	9.417	0.106	0.61	0.511798
646	ARL13B_KAN566-1_6.tif:0001-0023	1.924	640.622	130	1583	62.992	3.524	0.393	1232.63	47406	3.002	0.333	0.599	0.549381
647	ARL13B_KAN566-1_6.tif:0002-0159	2.08	703.95	285	1334	52.465	25.727	0.53	1464.3	56316	4.078	0.245	0.879	0.652637
648	ARL13B_KAN566-1_6.tif:0003-0246	2.938	596.522	342	1095	183.498	39.551	0.401	1752.69	67407	5.23	0.191	0.704	0.781169
649	ARL13B_KAN566-1_6.tif:0004-0278	4.706	1037.19	353	2421	141.067	45.06	0.548	4881.3	187731	3.229	0.31	0.842	2.17558
650	ARL13B_KAN566-1_6.tif:0005-0308	1.95	565.84	348	915	45.125	49.473	0.425	1103.45	42438	3.638	0.275	0.644	0.491807
651	ARL13B_KAN566-1_6.tif:0006-0357	2.028	1054.27	267	2357	27.229	57.546	0.42	2138.19	82233	3.651	0.274	0.672	0.952985
652	ARL13B_KAN566-1_6.tif:0007-0403	1.586	522.787	333	851	194.707	65.078	0.507	829.19	31890	2.581	0.387	0.726	0.369568
653	ARL13B_KAN566-1_6.tif:0008-0449	3.614	611.489	320	1228	173.082	72.455	0.328	2210.05	84997	6.22	0.161	0.745	0.985017
654	ARL13B_KAN566-1_6.tif:0009-0451	2.86	633.645	256	1541	146.761	72.831	0.352	1812.34	69701	5.263	0.19	0.712	0.807754
655	ARL13B_KAN566-1_6.tif:0010-0517	4.758	693.634	0	1756	7.218	82.738	0.128	3300.51	126935	2.043	0.489	0.261	1.47103
656	ARL13B_KAN566-1_6.tif:0011-0524	2.964	1481.89	311	4366	32.101	84.591	0.482	4392.6	168936	3.478	0.288	0.776	1.95777
657	ARL13B_KAN566-1_6.tif:0012-0549	3.406	813.122	212	2065	79.912	88.82	0.304	2769.66	106519	5.364	0.186	0.642	1.23443
658	ARL13B_KAN566-1_6.tif:0013-0557	3.874	863.973	242	1833	140.625	89.719	0.35	3347.23	128732	3.882	0.258	0.652	1.49185
659	ARL13B_KAN566-1_6.tif:0014-0596	1.43	533.909	225	1046	129.661	96.449	0.455	763.536	29365	3.331	0.3	0.719	0.340306
660	ARL13B_KAN566-1_6.tif:0015-0607	2.73	1286.15	268	4822	215.153	97.675	0.498	3511.41	135046	3.262	0.307	0.75	1.56503
661	ARL13B_KAN566-1_6.tif:0016-0671	2.106	1171.2	327	3097	49.539	108.297	0.457	2466.69	94867	4.529	0.221	0.79	1.0994
662	ARL13B_KAN566-1_6.tif:0017-0688	2.522	1407.35	361	3130	90.555	110.889	0.578	3549.55	136513	3.153	0.317	0.795	1.58203
663	ARL13B_KAN566-1_6.tif:0018-0756	1.794	1191.38	354	3190	49.881	122.044	0.502	2137.46	82205	4.04	0.247	0.817	0.952661
664	ARL13B_KAN566-1_6.tif:0019-0767	1.586	681.902	351	1220	2.642	123.516	0.267	1081.56	41596	6.525	0.153	0.517	0.482049
665	ARL13B_KAN566-1_6.tif:0020-0764	3.068	1175.64	233	2802	216.84	123.061	0.295	3607.09	138726	6.263	0.16	0.65	1.60767
666	ARL13B_KAN566-1_6.tif:0021-0802	3.016	578.724	267	1128	190.418	129.157	0.365	1745.54	67132	5.369	0.186	0.763	0.777982
667	ARL13B_KAN566-1_6.tif:0022-0798	3.198	633.927	84	1521	177.464	129.147	0.248	2027.42	77973	4.219	0.237	0.477	0.903617
668	ARL13B_KAN566-1_6.tif:0023-0842	3.328	862.727	136	1868	44.538	136.08	0.225	2871.33	110429	6.5	0.154	0.57	1.27974
669	ARL13B_KAN566-1_6.tif:0024-0856	2.678	560.379	317	1003	159.774	137.979	0.514	1500.78	57719	3.76	0.266	0.821	0.668896
670	ARL13B_KAN566-1_6.tif:0025-0922	0.91	461.057	355	787	174.452	148.753	0.579	419.587	16137	3.406	0.294	0.769	0.187009
671	ARL13B_KAN566-1_6.tif:0026-0936	1.586	459.18	112	852	163.604	151.079	0.422	728.304	28010	3.895	0.257	0.61	0.324603
										86289.9				1
672	ARL13B_KAN566-5_1.tif:0001-0033	2.886	846.64	170	1671	198.54	5.514	0.361	2443.55	93977	4.035	0.248	0.649	1.08908
673	ARL13B_KAN566-5_1.tif:0002-0084	2.028	659.744	322	1229	107.535	13.735	0.492	1338.04	51460	2.959	0.338	0.726	0.596362
674	ARL13B_KAN566-5_1.tif:0003-0148	4.238	675.436	37	1728	122.653	24.256	0.196	2862.67	110096	9.873	0.101	0.583	1.27588
675	ARL13B_KAN566-5_1.tif:0004-0185	2.678	950.311	307	2697	150.943	29.802	0.583	2545.09	97882	2.497	0.4	0.802	1.13434
676	ARL13B_KAN566-5_1.tif:0005-0205	0.988	433.895	351	574	39.655	32.933	0.307	428.714	16488	5.167	0.194	0.524	0.191077
677	ARL13B_KAN566-5_1.tif:0006-0274	0.65	473.92	356	621	76.868	44.328	0.566	308.067	11848	2.593	0.386	0.794	0.137305
678	ARL13B_KAN566-5_1.tif:0007-0374	3.042	553.966	241	1292	190.689	60.479	0.3	1685.27	64814	6.86	0.146	0.674	0.751119
679	ARL13B_KAN566-5_1.tif:0008-0366	0.624	500.792	327	691	215.994	59.065	0.503	312.513	12019	4.141	0.241	0.857	0.139286
680	ARL13B_KAN566-5_1.tif:0009-0408	1.924	584.973	115	1440	71.939	65.971	0.443	1125.56	43288	3.851	0.26	0.705	0.501658
681	ARL13B_KAN566-5_1.tif:0010-0517	3.172	713.984	85	1809	47.93	83.325	0.476	2264.89	87106	2.929	0.341	0.687	1.00946
682	ARL13B_KAN566-5_1.tif:0011-0522	1.118	431.093	249	736	0.756	84.336	0.317	481.991	18537	7.097	0.141	0.782	0.214822
683	ARL13B_KAN566-5_1.tif:0012-0658	3.172	686.959	157	1762	35.418	106.371	0.396	2179.16	83809	3.866	0.259	0.629	0.971249
684	ARL13B_KAN566-5_1.tif:0013-0772	0.754	520.862	326	876	4.201	124.36	0.488	392.754	15105	3.13	0.319	0.784	0.175049
685	ARL13B_KAN566-5_1.tif:0014-0967	1.43	901.636	363	1932	173.961	156.033	0.388	1289.42	49590	6.018	0.166	0.663	0.574691
686	ARL13B_KAN566-5_1.tif:0015-0978	1.196	596.391	332	1250	36.818	157.657	0.503	713.327	27434	4.352	0.23	0.893	0.317928
687	ARL13B_KAN566-5_1.tif:0016-1027	0.754	543.552	269	989	83.831	165.612	0.33	409.863	15763	5.354	0.187	0.58	0.182675
688	ARL13B_KAN566-5_2.tif:0001-0045	3.432	545.348	125	1205	217.442	7.342	0.473	1871.75	71986	3.66	0.273	0.783	0.834234
689	ARL13B_KAN566-5_2.tif:0002-0077	2.548	949.582	356	2405	43.46	12.322	0.314	2419.68	93059	6.244	0.16	0.624	1.07845
690	ARL13B_KAN566-5_2.tif:0003-0194	1.82	1302.63	278	2893	188.517	31.186	0.49	2370.93	91184	2.705	0.37	0.7	1.05672
691	ARL13B_KAN566-5_2.tif:0004-0317	2.002	701.169	222	1543	93.191	51.132	0.291	1403.83	53990	6.982	0.143	0.653	0.625681
692	ARL13B_KAN566-5_2.tif:0005-0387	1.586	1062	356	2610	223.467	62.289	0.439	1684.43	64782	4.137	0.242	0.797	0.750748
693	ARL13B_KAN566-5_2.tif:0006-0443	3.172	781.131	138	2084	117.533	71.36	0.234	2477.9	95298	7.977	0.125	0.615	1.10439
694	ARL13B_KAN566-5_2.tif:0007-0477	3.432	812.008	52	2226	156.5	77.107	0.209	2786.98	107185	7.504	0.133	0.499	1.24215
695	ARL13B_KAN566-5_2.tif:0008-0683	2.886	624.432	235	1070	189.475	110.262	0.228	1802.22	69312	8.046	0.124	0.559	0.803246
696	ARL13B_KAN566-5_2.tif:0009-0858	2.132	627.829	334	1254	221.782	138.321	0.46	1338.61	51482	4.266	0.234	0.808	0.596617
697	ARL13B_KAN566-5_2.tif:0010-0914	1.69	464.446	216	723	130.361	147.473	0.313	784.961	30189	3.607	0.277	0.528	0.349855
698	ARL13B_KAN566-5_2.tif:0011-0975	0.832	426.844	117	723	47.841	157.204	0.563	355.155	13659	2.603	0.384	0.736	0.158292
699	ARL13B_KAN566-5_3.tif:0001-0008	1.04	832.275	386	2246	127.601	1.411	0.465	865.618	33291	3.675	0.272	0.656	0.385804
700	ARL13B_KAN566-5_3.tif:0002-0094	1.846	610.718	92	1461	205.234	15.263	0.261	1127.45	43361	6.027	0.166	0.546	0.502504
701	ARL13B_KAN566-5_3.tif:0003-0152	1.976	698.487	352	2224	167.405	24.714	0.343	1380.29	53085	5.615	0.178	0.661	0.615194
702	ARL13B_KAN566-5_3.tif:0004-0194	1.092	535.095	316	919	59.29	31.417	0.572	584.359	22474	2.375	0.421	0.757	0.260448
703	ARL13B_KAN566-5_3.tif:0005-0255	1.976	911.092	357	1558	196.534	41.218	0.364	1800.43	69243	6.215	0.161	0.738	0.802446
704	ARL13B_KAN566-5_3.tif:0006-0277	3.094	971.84	360	2328	32.636	44.861	0.31	3007.05	115649	5.78	0.173	0.62	1.34024
705	ARL13B_KAN566-5_3.tif:0007-0438	3.068	783.949	174	2133	200.52	70.679	0.211	2405.3	92506	7.916	0.126	0.533	1.07204
706	ARL13B_KAN566-5_3.tif:0008-0465	3.432	700.508	272	1289	110.875	74.675	0.346	2404.29	92467	3.764	0.266	0.569	1.07159
707	ARL13B_KAN566-5_3.tif:0009-0593	2.808	1333.75	16	4185	92.795	95.42	0.421	3745.4	144045	3.371	0.297	0.69	1.66931
708	ARL13B_KAN566-5_3.tif:0010-0664	3.328	938.953	191	2647	148.394	107.244	0.256	3125.02	120186	7.695	0.13	0.631	1.39282
709	ARL13B_KAN566-5_3.tif:0011-0845	0.702	531.444	350	939	127.253	136.235	0.398	373.096	14349	5.092	0.196	0.659	0.166288
710	ARL13B_KAN566-5_3.tif:0012-0853	0.91	494.229	232	857	124.907	137.613	0.495	449.775	17298	4.068	0.246	0.707	0.200464
711	ARL13B_KAN566-5_3.tif:0013-0914	2.808	1081.38	353	2206	161.891	147.48	0.378	3036.7	116789	5.478	0.183	0.742	1.35345
712	ARL13B_KAN566-5_3.tif:0014-0968	2.158	601.096	208	1451	213.411	156.128	0.346	1297.24	49891	4.44	0.225	0.659	0.578179
713	ARL13B_KAN566-5_4.tif:0001-0026	2.132	441.073	206	715	69.973	4.218	0.425	940.425	36168	4.392	0.228	0.732	0.419145
714	ARL13B_KAN566-5_4.tif:0002-0193	2.704	829.808	58	2112	155.152	31.042	0.378	2243.93	86300	4.721	0.212	0.634	1.00012
715	ARL13B_KAN566-5_4.tif:0003-0209	1.066	402.244	296	600	72.938	33.778	0.43	428.818	16492	4.196	0.238	0.678	0.191123
716	ARL13B_KAN566-5_4.tif:0004-0249	1.638	506.365	288	831	165.126	40.286	0.521	829.476	31901	3.001	0.333	0.808	0.369696
717	ARL13B_KAN566-5_4.tif:0005-0282	3.276	1346.67	219	5849	114.683	45.437	0.448	4411.95	169680	4.538	0.22	0.785	1.96639
718	ARL13B_KAN566-5_4.tif:0006-0322	1.82	708.443	41	1925	88.697	52.176	0.524	1289.44	49591	2.292	0.436	0.745	0.574702
719	ARL13B_KAN566-5_4.tif:0007-0453	2.262	738.057	50	2200	127.97	72.819	0.503	1669.59	64211	2.379	0.42	0.669	0.744131
720	ARL13B_KAN566-5_4.tif:0008-0469	2.158	614.301	289	1614	184.205	75.734	0.463	1325.74	50987	3.954	0.253	0.716	0.59088
721	ARL13B_KAN566-5_4.tif:0009-0579	1.482	470.281	217	858	197.536	93.456	0.336	696.998	26806	6.483	0.154	0.708	0.31065
722	ARL13B_KAN566-5_4.tif:0010-0599	1.872	644.264	329	1282	146.332	96.587	0.564	1206.13	46387	3.432	0.291	0.796	0.537571
723	ARL13B_KAN566-5_4.tif:0011-0620	2.99	747.113	50	2071	52.453	100.134	0.265	2234	85918	8.092	0.124	0.639	0.99569
724	ARL13B_KAN566-5_4.tif:0012-0852	2.158	540.602	154	1229	212.962	137.254	0.246	1166.69	44870	7.039	0.142	0.539	0.519991
725	ARL13B_KAN566-5_4.tif:0013-0978	0.806	715.613	350	1359	96.753	157.742	0.596	576.819	22184	3.135	0.319	0.785	0.257087
726	ARL13B_KAN566-5_4.tif:0014-1030	1.196	689.609	381	1138	64.584	166.189	0.445	824.822	31722	4.359	0.229	0.736	0.367621
727	ARL13B_KAN566-5_5.tif:0001-0034	2.548	658.184	352	1425	210.267	5.479	0.262	1677.15	64502	6.734	0.148	0.594	0.747503
728	ARL13B_KAN566-5_5.tif:0002-0095	0.91	385.6	243	547	131.458	15.528	0.237	350.917	13496	5.445	0.184	0.458	0.156403
729	ARL13B_KAN566-5_5.tif:0003-0125	2.08	628.55	155	1177	222.319	19.971	0.252	1307.46	50284	7.221	0.138	0.675	0.582733
730	ARL13B_KAN566-5_5.tif:0004-0197	3.926	576.344	215	1186	95.5	31.811	0.292	2262.86	87028	7.995	0.125	0.78	1.00855
731	ARL13B_KAN566-5_5.tif:0005-0222	1.846	537.887	158	901	172.103	35.874	0.525	993	38190	3.225	0.31	0.751	0.442578
732	ARL13B_KAN566-5_5.tif:0006-0239	0.78	466.767	127	998	14.593	38.614	0.408	364.1	14003	4.197	0.238	0.667	0.162279
733	ARL13B_KAN566-5_5.tif:0007-0333	1.716	667.455	37	1775	60.356	53.718	0.383	1145.42	44052	2.873	0.348	0.6	0.510512
734	ARL13B_KAN566-5_5.tif:0008-0405	3.874	796.201	339	2041	102.857	65.299	0.438	3084.67	118634	4.539	0.22	0.774	1.37483
735	ARL13B_KAN566-5_5.tif:0009-0525	4.16	681.994	216	1302	31.465	84.704	0.298	2837.26	109119	8	0.125	0.721	1.26456
736	ARL13B_KAN566-5_5.tif:0010-0560	4.836	657.978	238	1703	68.337	89.991	0.303	3182.18	122384	2.635	0.379	0.491	1.41829
737	ARL13B_KAN566-5_5.tif:0011-0556	1.846	712.746	309	1423	102.574	89.561	0.513	1315.81	50605	3.353	0.298	0.71	0.586453
738	ARL13B_KAN566-5_5.tif:0012-0675	0.78	448.567	226	754	127.269	108.892	0.588	349.903	13457	3.372	0.297	0.822	0.155951
739	ARL13B_KAN566-5_5.tif:0013-0763	3.302	969.047	193	2692	162.745	122.952	0.404	3199.99	123069	4.458	0.224	0.741	1.42623
740	ARL13B_KAN566-5_5.tif:0014-0829	3.12	699.267	187	1762	78.956	133.815	0.476	2181.84	83912	3.177	0.315	0.686	0.972443
741	ARL13B_KAN566-5_5.tif:0015-0830	2.34	1004.97	350	2160	199.808	133.902	0.425	2351.76	90447	4.985	0.201	0.7	1.04818
742	ARL13B_KAN566-5_5.tif:0016-0876	2.964	558.719	146	1483	126.024	141.548	0.173	1656.14	63694	2.62	0.382	0.348	0.73814
743	ARL13B_KAN566-5_5.tif:0017-0953	0.728	617.893	213	1279	158.146	153.614	0.564	449.853	17301	3.156	0.317	0.747	0.200499
744	ARL13B_KAN566-5_6.tif:0001-0101	0.832	532.781	281	1101	41.567	16.498	0.563	443.301	17049	2.754	0.363	0.762	0.197578
745	ARL13B_KAN566-5_6.tif:0002-0193	3.042	644.957	195	1308	137.909	31.104	0.48	1962.08	75460	3.186	0.314	0.762	0.874494
746	ARL13B_KAN566-5_6.tif:0003-0231	3.796	1280.17	41	3651	108.517	37.198	0.312	4859.82	186905	5.76	0.174	0.659	2.16601
747	ARL13B_KAN566-5_6.tif:0004-0294	2.574	645.051	195	1505	191.196	47.358	0.342	1660.46	63860	4.42	0.226	0.643	0.740063
748	ARL13B_KAN566-5_6.tif:0005-0324	2.106	427.802	269	681	172.391	52.001	0.335	901.006	34652	5.038	0.198	0.692	0.401576
749	ARL13B_KAN566-5_6.tif:0006-0318	0.962	488.946	222	904	129.625	51.219	0.485	470.394	18091	3.162	0.316	0.692	0.209654
750	ARL13B_KAN566-5_6.tif:0007-0358	1.69	823.785	380	1631	14.546	57.868	0.538	1392.28	53546	3.83	0.261	0.839	0.620536
751	ARL13B_KAN566-5_6.tif:0008-0518	4.42	1201.66	184	3978	192.455	83.652	0.329	5311.65	204282	6.629	0.151	0.744	2.36739
752	ARL13B_KAN566-5_6.tif:0009-0552	4.654	907.916	243	2590	73.01	89.128	0.275	4225.7	162517	6.155	0.162	0.662	1.88338
753	ARL13B_KAN566-5_6.tif:0010-0600	2.496	607.479	354	1014	186.796	96.941	0.255	1516.36	58318	7.909	0.126	0.651	0.675838
754	ARL13B_KAN566-5_6.tif:0011-0694	1.43	567.273	231	1218	180.238	111.897	0.565	811.249	31200	2.666	0.375	0.78	0.361572
755	ARL13B_KAN566-5_6.tif:0012-0773	2.496	629.292	262	1243	206.602	125.127	0.185	1570.81	60412	9.037	0.111	0.538	0.700105
756	ARL13B_KAN566-5_6.tif:0013-0871	1.118	549.116	104	999	180.576	140.406	0.231	613.949	23612	7.421	0.135	0.652	0.273636
										63332.6				0.733952
757	ARL13B_KAN566-6_1.tif:0001-0089	1.248	454.771	73	696	196.618	14.378	0.296	567.588	21829	4.582	0.218	0.578	0.252973
758	ARL13B_KAN566-6_1.tif:0002-0375	3.692	867.739	247	2788	86.676	60.071	0.235	3203.89	123219	5.232	0.191	0.53	1.42797
759	ARL13B_KAN566-6_1.tif:0003-0407	3.458	816.173	199	2250	115.503	65.673	0.411	2822.5	108551	5.536	0.181	0.821	1.25798
760	ARL13B_KAN566-6_1.tif:0004-0501	2.184	782.571	359	1720	96.433	80.844	0.316	1709.24	65736	6.26	0.16	0.634	0.761804
761	ARL13B_KAN566-6_1.tif:0005-0565	1.456	771.339	269	1583	80.458	91.178	0.493	1123.14	43195	3.715	0.269	0.696	0.50058
762	ARL13B_KAN566-6_1.tif:0006-0751	1.768	652.588	350	1276	203.801	121.089	0.344	1153.85	44376	6.328	0.158	0.654	0.514266
763	ARL13B_KAN566-6_1.tif:0007-0762	3.744	1278.24	133	3063	95.107	123.23	0.485	4786.03	184067	2.805	0.357	0.716	2.13312
764	ARL13B_KAN566-6_1.tif:0008-0814	1.612	615.984	105	1527	11.228	131.455	0.267	993.026	38191	6.071	0.165	0.556	0.442589
765	ARL13B_KAN566-6_1.tif:0009-0892	0.884	435.912	115	875	191.731	143.835	0.231	385.369	14821	8.163	0.122	0.54	0.171758
766	ARL13B_KAN566-6_1.tif:0010-0938	2.522	831.361	259	2702	66.416	151.137	0.367	2096.82	80642	4.67	0.214	0.593	0.934547
767	ARL13B_KAN566-6_1.tif:0011-0965	1.638	355.54	137	646	33.81	155.843	0.598	582.409	22399	1.765	0.567	0.724	0.259578
768	ARL13B_KAN566-6_1.tif:0012-0980	2.132	1238	361	3357	217.219	157.986	0.429	2639.57	101516	4.972	0.201	0.692	1.17645
769	ARL13B_KAN566-6_1.tif:0013-1002	1.092	823.357	369	1649	135.611	161.653	0.594	899.16	34581	2.764	0.362	0.718	0.400754
770	ARL13B_KAN566-6_1.tif:0014-1031	1.144	586.568	350	882	129.597	166.23	0.389	671.074	25809	4.472	0.224	0.652	0.299096
771	ARL13B_KAN566-6_2.tif:0001-0168	2.834	508.459	331	731	106.806	26.83	0.512	1441.06	55422	2.787	0.359	0.741	0.642277
772	ARL13B_KAN566-6_2.tif:0002-0183	2.834	904.917	227	2141	186.267	29.43	0.315	2564.69	98636	6.466	0.155	0.724	1.14308
773	ARL13B_KAN566-6_2.tif:0003-0220	2.782	1201.72	358	3818	167.79	35.61	0.426	3343.39	128584	3.873	0.258	0.645	1.49014
774	ARL13B_KAN566-6_2.tif:0004-0371	3.042	1025.7	343	2568	183.534	59.933	0.392	3120.37	120007	4.113	0.243	0.69	1.39074
775	ARL13B_KAN566-6_2.tif:0005-0460	2.47	862.8	360	1619	118.367	74.094	0.321	2131.24	81966	6.428	0.156	0.66	0.949891
776	ARL13B_KAN566-6_2.tif:0006-0470	2.574	836.354	251	1827	103.693	76.072	0.32	2152.9	82799	5.456	0.183	0.717	0.959544
777	ARL13B_KAN566-6_2.tif:0007-0494	1.04	433.7	333	713	76.775	79.718	0.557	451.075	17348	2.79	0.358	0.748	0.201043
778	ARL13B_KAN566-6_2.tif:0008-0503	1.534	967.186	357	2306	61.399	81.236	0.382	1483.75	57064	4.745	0.211	0.678	0.661306
779	ARL13B_KAN566-6_2.tif:0009-0570	2.158	950.157	171	3477	170.543	92.156	0.544	2050.56	78863	2.232	0.448	0.716	0.913931
780	ARL13B_KAN566-6_2.tif:0010-0670	1.95	924.56	209	2656	81.692	108.29	0.311	1803	69342	6.127	0.163	0.612	0.803593
781	ARL13B_KAN566-6_2.tif:0011-0675	1.118	490.767	184	881	160.854	109.011	0.543	548.711	21103	2.634	0.38	0.754	0.244559
782	ARL13B_KAN566-6_2.tif:0012-0702	2.574	650.384	254	1253	216.143	113.351	0.354	1674.19	64388	5.31	0.188	0.697	0.746182
783	ARL13B_KAN566-6_2.tif:0013-0759	2.73	712.038	94	2270	172.483	122.288	0.284	1943.98	74764	6.018	0.166	0.598	0.866428
784	ARL13B_KAN566-6_2.tif:0014-0938	0.676	583.577	374	892	110.884	151.308	0.43	394.522	15173	5.193	0.193	0.675	0.175837
785	ARL13B_KAN566-6_3.tif:0001-0026	1.014	471.692	351	784	16.243	4.17	0.234	478.325	18396	9.451	0.106	0.634	0.213188
786	ARL13B_KAN566-6_3.tif:0002-0077	0.78	654.5	352	1477	222.934	12.427	0.442	510.541	19635	4.298	0.233	0.659	0.227547
787	ARL13B_KAN566-6_3.tif:0003-0181	1.222	566.894	355	975	218.293	29.325	0.314	692.786	26644	6.393	0.156	0.696	0.308773
788	ARL13B_KAN566-6_3.tif:0004-0207	2.184	723.714	262	1700	140.347	33.39	0.311	1580.69	60792	6.891	0.145	0.686	0.704509
789	ARL13B_KAN566-6_3.tif:0005-0206	1.274	869.551	374	2097	120.218	33.206	0.57	1107.88	42608	3.206	0.312	0.742	0.493777
790	ARL13B_KAN566-6_3.tif:0006-0289	3.874	935.168	211	2669	175.299	46.91	0.294	3623.06	139340	4.818	0.208	0.556	1.61479
791	ARL13B_KAN566-6_3.tif:0007-0334	2.834	1154.34	357	2218	195.449	53.721	0.33	3271.59	125823	5.343	0.187	0.619	1.45814
792	ARL13B_KAN566-6_3.tif:0008-0417	3.328	819.43	359	1919	98.544	67.3	0.362	2727.23	104887	6.631	0.151	0.769	1.21552
793	ARL13B_KAN566-6_3.tif:0009-0427	2.34	542.044	87	1074	66.973	68.938	0.35	1268.46	48784	2.664	0.375	0.557	0.56535
794	ARL13B_KAN566-6_3.tif:0010-0427	2.444	1061.68	77	3789	150.124	68.876	0.357	2594.9	99798	5.356	0.187	0.783	1.15654
795	ARL13B_KAN566-6_3.tif:0011-0497	1.014	445.436	264	611	190.827	80.081	0.548	451.699	17372	3.886	0.257	0.857	0.201321
796	ARL13B_KAN566-6_3.tif:0012-0529	2.86	903.336	137	2200	103.064	85.508	0.426	2583.7	99367	4.17	0.24	0.833	1.15155
797	ARL13B_KAN566-6_3.tif:0013-0575	1.56	852.25	282	2038	162.516	92.598	0.374	1329.59	51135	4.925	0.203	0.755	0.592595
798	ARL13B_KAN566-6_3.tif:0014-0712	3.744	961.062	267	2558	198.667	114.961	0.317	3598.43	138393	6.524	0.153	0.701	1.60381
799	ARL13B_KAN566-6_3.tif:0015-0907	1.82	569.914	170	1242	64.387	146.169	0.246	1037.31	39894	7.391	0.135	0.565	0.462325
800	ARL13B_KAN566-6_4.tif:0001-0114	2.678	897.427	281	3068	67.579	18.599	0.356	2403.45	92435	5.641	0.177	0.66	1.07121
801	ARL13B_KAN566-6_4.tif:0002-0123	2.522	616.505	196	1460	191.694	19.996	0.329	1554.92	59801	5.368	0.186	0.616	0.693024
802	ARL13B_KAN566-6_4.tif:0003-0369	2.002	1121.65	395	2926	155.53	59.364	0.461	2245.68	86367	3.702	0.27	0.73	1.00089
803	ARL13B_KAN566-6_4.tif:0004-0400	3.068	613.517	256	1371	76.808	64.474	0.275	1882.38	72395	7.478	0.134	0.628	0.838974
804	ARL13B_KAN566-6_4.tif:0005-0420	2.756	1254.35	334	3096	110.885	67.964	0.494	3457.19	132961	3.421	0.292	0.734	1.54086
805	ARL13B_KAN566-6_4.tif:0006-0506	2.886	715.532	91	1563	188.383	81.563	0.532	2065.15	79424	3.762	0.266	0.835	0.920432
806	ARL13B_KAN566-6_4.tif:0007-0554	1.248	767.542	283	1549	149.889	89.306	0.477	957.95	36842	3.09	0.324	0.738	0.426956
807	ARL13B_KAN566-6_4.tif:0008-0621	2.652	756.755	303	1945	205.15	100.038	0.365	2007.04	77189	4.758	0.21	0.624	0.894531
808	ARL13B_KAN566-6_4.tif:0009-0709	1.794	683.377	194	1485	18.304	114.208	0.395	1226.05	47153	4.427	0.226	0.657	0.546449
809	ARL13B_KAN566-6_4.tif:0010-0843	2.808	529.917	140	1179	43.105	135.753	0.248	1488.1	57231	8.051	0.124	0.661	0.663241
810	ARL13B_KAN566-6_5.tif:0001-0013	1.3	518.68	357	787	27.703	2.112	0.416	674.325	25934	4.755	0.21	0.649	0.300545
811	ARL13B_KAN566-6_5.tif:0002-0274	2.782	833.542	102	2101	78.618	43.987	0.377	2319.05	89189	4.401	0.227	0.635	1.0336
812	ARL13B_KAN566-6_5.tif:0003-0335	2.34	663.878	124	1925	25.177	53.901	0.321	1553.57	59749	4.665	0.214	0.61	0.692422
813	ARL13B_KAN566-6_5.tif:0004-0413	3.562	872.46	164	2815	109.072	66.594	0.26	3107.89	119527	7.193	0.139	0.56	1.38518
814	ARL13B_KAN566-6_5.tif:0005-0429	2.184	831.119	229	1878	174.659	69.163	0.361	1815.27	69814	5.315	0.188	0.683	0.809063
815	ARL13B_KAN566-6_5.tif:0006-0473	3.328	882.281	135	2052	130.799	76.3	0.231	2936.41	112932	7.672	0.13	0.537	1.30875
816	ARL13B_KAN566-6_5.tif:0007-0576	1.378	420.585	86	885	17.727	92.991	0.571	579.601	22291	3.487	0.287	0.841	0.258327
817	ARL13B_KAN566-6_5.tif:0008-0615	1.95	615.387	190	1090	56.679	99.245	0.325	1200.08	46154	5.503	0.182	0.63	0.534871
818	ARL13B_KAN566-6_5.tif:0009-0633	0.858	635.939	282	1079	210.077	102.137	0.546	545.669	20986	3.789	0.264	0.795	0.243203
819	ARL13B_KAN566-6_5.tif:0010-0636	1.222	859.319	378	1751	205.396	102.55	0.525	1050.15	40388	3.862	0.259	0.832	0.46805
820	ARL13B_KAN566-6_5.tif:0011-0646	3.64	740.793	289	1944	173.511	104.156	0.486	2696.65	103711	3.87	0.258	0.838	1.20189
821	ARL13B_KAN566-6_5.tif:0012-0900	2.236	1175.57	346	3087	96.158	145.264	0.315	2628.73	101099	2.461	0.406	0.503	1.17162
822	ARL13B_KAN566-6_5.tif:0013-0937	1.716	817.182	277	1635	14.378	151.016	0.475	1402.37	53934	4.001	0.25	0.733	0.625032
823	ARL13B_KAN566-6_6.tif:0001-0081	2.47	750.768	157	1933	136.507	12.901	0.378	1854.51	71323	3.733	0.268	0.588	0.826551
824	ARL13B_KAN566-6_6.tif:0002-0114	2.288	1319.57	176	4475	87.066	18.67	0.477	3019.35	116122	3.688	0.271	0.789	1.34572
825	ARL13B_KAN566-6_6.tif:0003-0295	1.768	525.029	182	954	131.262	47.22	0.356	928.308	35702	3.662	0.273	0.69	0.413745
826	ARL13B_KAN566-6_6.tif:0004-0451	2.73	907.267	206	2479	58.94	72.866	0.411	2476.99	95263	5.234	0.191	0.732	1.10399
827	ARL13B_KAN566-6_6.tif:0005-0454	0.65	405.96	320	564	22.372	73.372	0.397	263.89	10149	3.18	0.315	0.633	0.117615
828	ARL13B_KAN566-6_6.tif:0006-0548	2.08	652.862	343	1328	101.404	88.286	0.249	1358.04	52229	6.402	0.156	0.526	0.605273
829	ARL13B_KAN566-6_6.tif:0007-0663	2.47	1086.73	356	2644	38.09	106.981	0.346	2684.38	103239	5.921	0.169	0.739	1.19642
830	ARL13B_KAN566-6_6.tif:0008-0921	2.002	676.87	187	1369	162.619	148.623	0.339	1355.18	52119	5.624	0.178	0.636	0.603999
831	ARL13B_KAN566-6_6.tif:0009-0978	2.418	932.269	150	2570	97.405	157.703	0.405	2254.36	86701	4.916	0.203	0.71	1.00476
										68501.5				0.793853
832	ARL13B_KAN566-7_1.tif:0001-0011	1.222	455.468	203	880	100.073	1.861	0.424	556.616	21407	5.099	0.196	0.77
833	ARL13B_KAN566-7_1.tif:0002-0039	1.378	514.528	356	778	165.998	6.324	0.586	709.063	27270	3.505	0.285	0.828
834	ARL13B_KAN566-7_1.tif:0003-0048	1.378	739.491	125	2180	140.715	7.982	0.402	1019.08	39193	4.947	0.202	0.716
835	ARL13B_KAN566-7_1.tif:0004-0053	1.794	610.13	213	1308	168.316	8.454	0.387	1094.64	42099	4.291	0.233	0.676
836	ARL13B_KAN566-7_1.tif:0005-0130	4.134	674.912	170	1369	196.677	21.224	0.166	2790.25	107311	8.401	0.119	0.483
837	ARL13B_KAN566-7_1.tif:0006-0128	2.652	788.971	278	1676	81.205	20.667	0.361	2092.48	80475	5.44	0.184	0.648
838	ARL13B_KAN566-7_1.tif:0007-0146	0.78	420.7	263	724	123.872	23.403	0.588	328.166	12621	1.654	0.604	0.759
839	ARL13B_KAN566-7_1.tif:0008-0164	0.754	442.172	350	578	123.815	26.542	0.401	333.418	12823	3.758	0.266	0.69
840	ARL13B_KAN566-7_1.tif:0009-0194	3.536	1314.53	194	3429	212.909	31.411	0.344	4648.46	178776	3.925	0.255	0.62
841	ARL13B_KAN566-7_1.tif:0010-0257	1.898	1001.84	143	2399	38.918	41.405	0.473	1901.6	73134	2.386	0.419	0.664
842	ARL13B_KAN566-7_1.tif:0011-0342	1.482	650.842	138	1223	218.942	54.971	0.445	964.606	37098	3.387	0.295	0.792
843	ARL13B_KAN566-7_1.tif:0012-0392	3.822	689.612	249	1495	187.991	63.265	0.313	2635.86	101373	7.109	0.141	0.712
844	ARL13B_KAN566-7_1.tif:0013-0423	0.598	487.391	183	840	108.728	68.254	0.59	291.478	11210	2.384	0.419	0.708
845	ARL13B_KAN566-7_1.tif:0014-0475	4.68	1893.34	167	6081	84.117	76.45	0.437	8861.36	340801	3.553	0.281	0.684
846	ARL13B_KAN566-7_1.tif:0015-0566	3.952	1304.32	133	3686	157.407	91.458	0.365	5154.97	198256	3.113	0.321	0.57
847	ARL13B_KAN566-7_1.tif:0016-0599	2.86	778.373	350	2094	94.403	96.894	0.317	2226.28	85621	4.97	0.201	0.615
848	ARL13B_KAN566-7_1.tif:0017-0672	3.042	749.624	239	2266	37.606	108.275	0.247	2280.49	87706	7.137	0.14	0.565
849	ARL13B_KAN566-7_1.tif:0018-0682	0.936	569.417	307	1327	141.071	110.031	0.49	533.006	20499	3.051	0.328	0.655
850	ARL13B_KAN566-7_1.tif:0019-0782	3.458	673.015	310	1139	113.844	126.165	0.418	2327.43	89511	4.855	0.206	0.799
851	ARL13B_KAN566-7_1.tif:0020-0787	0.754	538.483	350	1092	134.369	126.951	0.417	406.04	15616	4.16	0.24	0.753
852	ARL13B_KAN566-7_1.tif:0021-0795	0.65	469.92	360	709	136.724	128.191	0.348	305.466	11748	4.192	0.239	0.568
853	ARL13B_KAN566-7_1.tif:0022-0845	2.522	868.103	354	1917	158.416	136.071	0.277	2189.49	84206	6.64	0.151	0.591
854	ARL13B_KAN566-7_1.tif:0023-0965	2.418	746.871	161	1730	190.061	155.749	0.264	1806.04	69459	2.48	0.403	0.443
855	ARL13B_KAN566-7_1.tif:0024-1003	2.756	793.5	232	1698	212.223	161.752	0.267	2187.02	84111	7.845	0.127	0.644
856	ARL13B_KAN566-7_1.tif:0025-1014	1.456	739.893	354	1464	10.81	163.617	0.383	1077.35	41434	3.55	0.282	0.58
857	ARL13B_KAN566-7_2.tif:0001-0116	1.43	497.636	343	819	12.614	18.448	0.235	711.663	27370	4.773	0.21	0.47
858	ARL13B_KAN566-7_2.tif:0002-0144	2.288	1243.86	229	3906	107.524	23.372	0.547	2846.13	109460	3.321	0.301	0.804
859	ARL13B_KAN566-7_2.tif:0003-0252	3.224	1149.68	124	3384	127.402	40.656	0.444	3706.81	142561	4.697	0.213	0.775
860	ARL13B_KAN566-7_2.tif:0004-0276	2.86	1113.05	253	2695	33.64	44.558	0.529	3183.5	122435	3.385	0.295	0.794
861	ARL13B_KAN566-7_2.tif:0005-0464	1.196	527.065	318	1222	220.758	74.936	0.288	630.408	24245	6.806	0.147	0.579
862	ARL13B_KAN566-7_2.tif:0006-0583	2.678	494.485	320	989	75.896	93.79	0.176	1324.31	50932	3.489	0.287	0.375
863	ARL13B_KAN566-7_2.tif:0007-0669	3.172	1088.41	260	3755	106.684	107.93	0.418	3452.64	132786	3.832	0.261	0.693
864	ARL13B_KAN566-7_2.tif:0008-0710	2.184	576.583	299	1034	179.74	114.501	0.247	1259.33	48433	7.769	0.129	0.575
865	ARL13B_KAN566-7_2.tif:0009-0881	0.988	465.421	343	711	36.481	142.189	0.324	459.864	17686	5.507	0.182	0.661
866	ARL13B_KAN566-7_2.tif:0010-0895	0.52	454.4	356	619	34.096	144.359	0.585	236.302	9088	3.035	0.33	0.727
867	ARL13B_KAN566-7_2.tif:0011-1023	2.132	760.159	322	1689	194.489	165.161	0.229	1620.76	62333	7.393	0.135	0.554
868	ARL13B_KAN566-7_3.tif:0001-0058	2.392	465.12	235	799	217.572	9.437	0.484	1112.63	42791	2.552	0.392	0.697
869	ARL13B_KAN566-7_3.tif:0002-0138	1.898	795.945	341	2173	215.235	22.17	0.24	1510.8	58104	8.299	0.12	0.547
870	ARL13B_KAN566-7_3.tif:0003-0255	2.574	863.475	212	2040	217.289	41.191	0.31	2222.72	85484	4.054	0.247	0.569
871	ARL13B_KAN566-7_3.tif:0004-0398	2.444	1135.19	256	2553	192.726	64.138	0.442	2774.57	106708	3.762	0.266	0.704
872	ARL13B_KAN566-7_3.tif:0005-0403	2.704	716.337	8	2196	86.261	65.466	0.279	1937.09	74499	4.542	0.22	0.558
873	ARL13B_KAN566-7_3.tif:0006-0437	1.014	522.949	80	1038	18.223	70.51	0.388	530.302	20395	3.431	0.291	0.696
874	ARL13B_KAN566-7_3.tif:0007-0463	2.028	608.474	280	1217	48.596	74.741	0.365	1234.06	47461	5.499	0.182	0.712
875	ARL13B_KAN566-7_3.tif:0008-0476	1.17	517.733	64	1079	36.631	76.95	0.447	605.784	23298	3.427	0.292	0.698
876	ARL13B_KAN566-7_3.tif:0009-0523	3.302	744.764	214	1907	117.69	84.842	0.22	2459.36	94585	1.852	0.54	0.389
877	ARL13B_KAN566-7_3.tif:0010-0582	1.404	606.815	250	1454	194.626	93.806	0.444	852.019	32768	2.847	0.351	0.655
878	ARL13B_KAN566-7_3.tif:0011-0597	0.91	700.429	388	1426	196.603	96.453	0.487	637.428	24515	3.851	0.26	0.753
879	ARL13B_KAN566-7_3.tif:0012-0603	2.054	665.329	145	1388	220.858	97.172	0.297	1366.67	52561	5.699	0.175	0.545
880	ARL13B_KAN566-7_3.tif:0013-0613	2.678	537.738	354	893	191.916	99.141	0.349	1440.15	55387	5.568	0.18	0.703
881	ARL13B_KAN566-7_3.tif:0014-0734	3.016	1297.8	260	2880	163.147	118.338	0.363	3914.41	150545	3.561	0.281	0.636
882	ARL13B_KAN566-7_3.tif:0015-0846	1.534	941.898	363	2101	122.898	136.597	0.47	1444.96	55572	3.835	0.261	0.702
883	ARL13B_KAN566-7_3.tif:0016-0905	2.288	824.045	281	2096	105.338	146.151	0.397	1885.53	72516	4.323	0.231	0.701
884	ARL13B_KAN566-7_4.tif:0001-0155	2.678	868.913	350	2189	136.442	24.876	0.402	2327.09	89498	4.297	0.233	0.667
885	ARL13B_KAN566-7_4.tif:0002-0235	0.936	542.556	360	822	11.735	37.939	0.431	507.863	19532	4.879	0.205	0.727
886	ARL13B_KAN566-7_4.tif:0003-0236	3.068	727.39	183	1979	68.833	38.152	0.308	2231.77	85832	6.829	0.146	0.659
887	ARL13B_KAN566-7_4.tif:0004-0246	0.598	514.913	358	766	10.134	39.58	0.532	307.937	11843	3.521	0.284	0.78
888	ARL13B_KAN566-7_4.tif:0005-0262	4.42	628.847	350	1680	207.246	42.218	0.311	2779.67	106904	6.924	0.144	0.714
889	ARL13B_KAN566-7_4.tif:0006-0308	1.248	605.229	205	1503	43.027	49.581	0.447	755.371	29051	3.002	0.333	0.78
890	ARL13B_KAN566-7_4.tif:0007-0358	2.314	765.18	278	1994	37.79	57.893	0.395	1770.73	68101	5.523	0.181	0.739
891	ARL13B_KAN566-7_4.tif:0008-0367	1.56	393.75	63	802	173.674	59.195	0.397	614.287	23625	5.231	0.191	0.795
892	ARL13B_KAN566-7_4.tif:0009-0372	3.536	483.522	145	844	168.417	59.858	0.353	1709.84	65759	3.961	0.252	0.733
893	ARL13B_KAN566-7_4.tif:0010-0377	1.326	358.824	67	636	162.131	60.897	0.422	475.829	18300	2.489	0.402	0.634
894	ARL13B_KAN566-7_4.tif:0011-0379	0.546	398.667	337	501	159.081	61.21	0.339	217.685	8372	5.038	0.198	0.7
895	ARL13B_KAN566-7_4.tif:0012-0389	2.704	627.885	354	1380	22.629	62.608	0.287	1697.9	65300	5.908	0.169	0.63
896	ARL13B_KAN566-7_4.tif:0013-0552	3.874	1241.94	81	4154	159.097	88.978	0.34	4811.56	185049	5.692	0.176	0.665
897	ARL13B_KAN566-7_4.tif:0014-0587	1.17	472.533	147	724	108.265	94.724	0.347	552.897	21264	4.576	0.219	0.608
898	ARL13B_KAN566-7_4.tif:0015-0691	2.392	675.565	295	1577	210.996	111.471	0.219	1616.05	62152	10.412	0.096	0.652
899	ARL13B_KAN566-7_4.tif:0016-0733	2.782	927.598	88	2273	27.023	118.003	0.261	2580.73	99253	6.736	0.148	0.552
900	ARL13B_KAN566-7_4.tif:0017-0788	0.702	386.815	272	515	53.908	127.08	0.51	271.56	10444	2.664	0.375	0.659
901	ARL13B_KAN566-7_4.tif:0018-0908	1.898	550.671	207	1137	207.793	146.372	0.211	1045.24	40199	7.323	0.137	0.531
902	ARL13B_KAN566-7_5.tif:0001-0074	3.692	1305.39	197	4939	135.621	11.741	0.4	4819.81	185366	2.61	0.383	0.576
903	ARL13B_KAN566-7_5.tif:0002-0097	0.676	395.846	345	483	143.878	15.765	0.288	267.608	10292	5.663	0.177	0.553
904	ARL13B_KAN566-7_5.tif:0003-0151	2.756	683.142	264	1680	96.92	24.273	0.383	1882.85	72413	3.796	0.263	0.648
905	ARL13B_KAN566-7_5.tif:0004-0186	2.028	828.09	108	2052	13.865	30.133	0.327	1679.47	64591	4.754	0.21	0.569
906	ARL13B_KAN566-7_5.tif:0005-0270	3.224	618.96	219	1615	86.437	43.681	0.294	1995.65	76751	3.426	0.292	0.539
907	ARL13B_KAN566-7_5.tif:0006-0398	0.702	510.259	243	970	160.423	64.437	0.582	358.224	13777	2.384	0.42	0.72
908	ARL13B_KAN566-7_5.tif:0007-0425	2.938	807.513	265	1936	192.786	68.72	0.297	2372.62	91249	6.745	0.148	0.595
909	ARL13B_KAN566-7_5.tif:0008-0424	3.354	797.822	326	1931	116.282	68.304	0.343	2676.05	102919	5.565	0.18	0.709
910	ARL13B_KAN566-7_5.tif:0009-0530	2.756	811.896	223	1751	17.232	85.581	0.281	2237.72	86061	7.036	0.142	0.652
911	ARL13B_KAN566-7_5.tif:0010-0544	3.042	1379.44	355	4192	122.301	87.752	0.455	4196.5	161394	4.297	0.233	0.799
912	ARL13B_KAN566-7_5.tif:0011-0584	0.754	523.793	278	1272	35.239	94.034	0.335	394.964	15190	2.792	0.358	0.532
913	ARL13B_KAN566-7_5.tif:0012-0639	2.782	1011.53	245	2835	75.835	103.116	0.357	2814.25	108234	5.812	0.172	0.706
914	ARL13B_KAN566-7_5.tif:0013-0871	1.586	885.098	316	1963	71.311	140.553	0.4	1403.85	53991	3.523	0.284	0.649
915	ARL13B_KAN566-7_5.tif:0014-0881	2.314	591.067	69	1089	57.004	142.176	0.221	1367.81	52605	8.26	0.121	0.652
916	ARL13B_KAN566-7_5.tif:0015-0890	2.028	1026.49	350	2202	218.721	143.725	0.367	2081.84	80066	5.089	0.197	0.658
917	ARL13B_KAN566-7_5.tif:0016-1028	1.768	848.132	312	1958	129.633	165.881	0.537	1499.59	57673	4.112	0.243	0.895
918	ARL13B_KAN566-7_6.tif:0001-0009	1.17	459.333	261	644	86.382	1.65	0.361	537.452	20670	4.265	0.234	0.647
919	ARL13B_KAN566-7_6.tif:0002-0054	1.352	471.135	178	1035	168.624	8.605	0.58	637.012	24499	2.937	0.341	0.8
920	ARL13B_KAN566-7_6.tif:0003-0055	2.912	1032.94	295	3024	177.669	9.233	0.354	3008.09	115689	5.057	0.198	0.651
921	ARL13B_KAN566-7_6.tif:0004-0152	2.756	745.877	280	1820	44.046	24.443	0.418	2055.76	79063	4.391	0.228	0.686
922	ARL13B_KAN566-7_6.tif:0005-0211	1.898	451.178	186	871	196.092	34.277	0.272	856.388	32936	5.01	0.2	0.652
923	ARL13B_KAN566-7_6.tif:0006-0306	1.846	700.803	165	1684	174.31	49.26	0.436	1293.76	49757	3.324	0.301	0.683
924	ARL13B_KAN566-7_6.tif:0007-0352	3.042	951.316	351	1957	189.766	56.859	0.36	2894.08	111304	5.529	0.181	0.678
925	ARL13B_KAN566-7_6.tif:0008-0395	3.224	1338.6	116	4386	33.781	63.724	0.476	4315.9	165986	4.503	0.222	0.827
926	ARL13B_KAN566-7_6.tif:0009-0489	0.598	471.957	350	754	35.296	79.016	0.253	282.247	10855	6.471	0.155	0.505
927	ARL13B_KAN566-7_6.tif:0010-0501	1.17	498.111	238	813	173.346	80.792	0.363	582.825	22415	3.599	0.278	0.57
928	ARL13B_KAN566-7_6.tif:0011-0610	1.248	668.375	263	1547	156.49	98.477	0.493	834.182	32082	3.72	0.269	0.733
929	ARL13B_KAN566-7_6.tif:0012-0621	3.692	1407.93	356	3734	196.432	100.125	0.304	5198.39	199926	6.806	0.147	0.74
930	ARL13B_KAN566-7_6.tif:0013-0801	3.12	1853.28	71	5242	174.71	129.054	0.55	5782.57	222393	3.187	0.314	0.814
931	ARL13B_KAN566-7_6.tif:0014-0897	1.3	379.86	105	590	214.043	144.467	0.256	493.848	18993	7.647	0.131	0.633
932	ARL13B_KAN566-7_6.tif:0015-0930	3.042	907.026	351	2379	172.065	149.967	0.198	2759.34	106122	10.611	0.094	0.602
933	ARL13B_KAN566-7_6.tif:0016-0951	2.054	706	209	1302	101.407	153.464	0.379	1450.21	55774	5.763	0.174	0.745
934	ARL13B_KAN566-7_6.tif:0017-0999	2.86	612.755	325	1018	167.163	161.206	0.459	1752.58	67403	4.196	0.238	0.756
										69875.7
935	ARL13B_KAN566-8_1.tif:0001-0027	1.144	794.318	350	1521	83.275	4.299	0.589	908.755	34950	3.343	0.299	0.772	0.40503
936	ARL13B_KAN566-8_1.tif:0002-0175	3.25	817.56	302	1872	94.613	28.12	0.347	2657.23	102195	5.762	0.174	0.687	1.18432
937	ARL13B_KAN566-8_1.tif:0003-0252	2.34	797.933	359	1385	144.174	40.721	0.378	1867.28	71814	5.97	0.167	0.69	0.832241
938	ARL13B_KAN566-8_1.tif:0004-0321	1.014	448.949	351	598	120.969	51.767	0.444	455.261	17509	2.432	0.411	0.629	0.202909
939	ARL13B_KAN566-8_1.tif:0005-0532	2.522	649.464	263	1571	150.43	85.766	0.352	1638.05	62998	4.611	0.217	0.674	0.730074
940	ARL13B_KAN566-8_1.tif:0006-0748	0.832	471.281	240	806	86.092	120.686	0.362	392.13	15081	6.113	0.164	0.771	0.174771
941	ARL13B_KAN566-8_2.tif:0001-0207	2.132	629.671	220	1256	27.346	33.446	0.269	1342.54	51633	7.498	0.133	0.577	0.598367
942	ARL13B_KAN566-8_2.tif:0002-0406	1.664	497.266	161	923	143.465	65.387	0.314	827.5	31825	5.167	0.194	0.624	0.368815
943	ARL13B_KAN566-8_2.tif:0003-0547	2.418	549.634	110	1238	79.823	88.262	0.281	1329.1	51116	4.972	0.201	0.527	0.592375
944	ARL13B_KAN566-8_2.tif:0004-0640	1.69	701.938	300	1400	138.034	103.253	0.313	1186.35	45626	6.727	0.149	0.674	0.528752
945	ARL13B_KAN566-8_2.tif:0005-0785	0.728	284.75	85	420	35.913	126.535	0.444	207.31	7973	2.726	0.367	0.636	0.0923978
946	ARL13B_KAN566-8_2.tif:0006-0829	2.106	594.877	319	1130	123.532	133.683	0.249	1252.88	48185	5.244	0.191	0.564	0.558408
947	ARL13B_KAN566-8_2.tif:0007-0855	1.768	494.015	108	1069	179.315	137.964	0.261	873.471	33593	8.149	0.123	0.624	0.389304
948	ARL13B_KAN566-8_3.tif:0001-0385	1.144	414.568	297	543	47.836	62.169	0.484	474.295	18241	3.123	0.32	0.677	0.211392
949	ARL13B_KAN566-8_3.tif:0002-0549	1.872	538.847	98	1238	117.397	88.755	0.327	1008.78	38797	5.129	0.195	0.61	0.449612
950	ARL13B_KAN566-8_3.tif:0003-0777	0.806	596.742	160	988	221.872	125.309	0.464	481.003	18499	2.319	0.431	0.66	0.214382
951	ARL13B_KAN566-8_3.tif:0004-0891	1.456	483.446	13	1053	68.681	144.002	0.431	703.94	27073	2.547	0.393	0.659	0.313745
952	ARL13B_KAN566-8_3.tif:0005-0959	0.702	412.926	230	639	80.95	154.678	0.386	289.891	11149	6.792	0.147	0.982	0.129204
953	ARL13B_KAN566-8_4.tif:0001-0042	2.6	792.15	19	2281	155.405	6.852	0.376	2059.71	79215	5.038	0.198	0.722	0.91801
954	ARL13B_KAN566-8_4.tif:0002-0163	0.754	489.69	248	849	200.837	26.403	0.48	369.248	14201	2.925	0.342	0.716	0.164573
955	ARL13B_KAN566-8_4.tif:0003-0172	1.066	646.537	376	952	44.558	27.78	0.363	689.25	26508	5.683	0.176	0.683	0.307197
956	ARL13B_KAN566-8_4.tif:0004-0209	1.508	422.052	116	674	210	34.021	0.308	636.492	24479	4.481	0.223	0.601	0.283683
957	ARL13B_KAN566-8_4.tif:0005-0317	0.858	342.727	137	744	26.604	51.031	0.58	294.078	11310	1.951	0.513	0.759	0.13107
958	ARL13B_KAN566-8_4.tif:0006-0524	1.794	596.58	122	1618	40.875	84.477	0.596	1070.33	41164	3.171	0.315	0.879	0.477043
959	ARL13B_KAN566-8_4.tif:0007-0596	0.91	435	288	669	42.932	96.292	0.405	395.874	15225	3.65	0.274	0.609	0.17644
960	ARL13B_KAN566-8_4.tif:0008-0614	1.612	500.468	5	762	201.895	98.922	0.466	806.803	31029	2.594	0.385	0.674	0.35959
961	ARL13B_KAN566-8_4.tif:0009-0634	1.118	395.279	317	560	97.281	102.253	0.231	441.949	16997	7.908	0.126	0.589	0.196976
962	ARL13B_KAN566-8_4.tif:0010-0626	0.572	441.409	237	735	220.194	100.979	0.484	252.501	9711	4.17	0.24	0.846	0.112539
963	ARL13B_KAN566-8_4.tif:0011-0882	0.754	346.172	140	449	207.787	142.431	0.209	261.03	10039	3.262	0.307	0.408	0.11634
964	ARL13B_KAN566-8_5.tif:0001-0022	1.898	469.534	329	668	200.106	3.73	0.27	891.23	34276	6.917	0.145	0.603	0.397219
965	ARL13B_KAN566-8_5.tif:0002-0045	1.56	763.283	279	2023	115.423	7.342	0.283	1190.79	45797	6.884	0.145	0.6	0.530734
966	ARL13B_KAN566-8_5.tif:0003-0101	1.43	468.018	183	794	139.207	15.792	0.303	669.306	25741	2.839	0.352	0.564	0.298308
967	ARL13B_KAN566-8_5.tif:0004-0398	3.328	563.055	181	1250	148.882	64.285	0.395	1873.96	72071	4.958	0.202	0.762	0.835219
968	ARL13B_KAN566-8_5.tif:0005-0431	1.638	610.921	117	1123	171.423	69.533	0.474	1000.75	38488	2.317	0.432	0.692	0.446031
969	ARL13B_KAN566-8_5.tif:0006-0622	2.314	496.539	240	858	190.211	100.626	0.336	1149.06	44192	4.414	0.227	0.571	0.512134
970	ARL13B_KAN566-8_5.tif:0007-0662	2.938	871.301	104	2161	144.438	106.984	0.335	2560.04	98457	4.523	0.221	0.585	1.141
971	ARL13B_KAN566-8_5.tif:0008-0731	0.754	540.276	320	776	32.175	117.865	0.569	407.393	15668	3.339	0.299	0.829	0.181574
972	ARL13B_KAN566-8_6.tif:0001-0097	1.69	393.185	69	723	92.489	15.923	0.288	664.522	25557	3.615	0.277	0.553	0.296176
973	ARL13B_KAN566-8_6.tif:0002-0166	1.82	542.5	331	897	91.558	26.461	0.411	987.409	37975	3.598	0.278	0.676	0.440086
974	ARL13B_KAN566-8_6.tif:0003-0197	2.782	886.084	99	2366	112.577	31.97	0.487	2465.23	94811	3.592	0.278	0.754	1.09875
975	ARL13B_KAN566-8_6.tif:0004-0224	0.988	516.684	352	920	25.753	36.336	0.509	510.515	19634	3.471	0.288	0.685	0.227535
976	ARL13B_KAN566-8_6.tif:0005-0259	1.664	636.078	273	1549	167.252	41.892	0.517	1058.5	40709	2.747	0.364	0.715	0.47177
977	ARL13B_KAN566-8_6.tif:0006-0323	1.976	502.066	135	1068	211.974	52.3	0.213	992.142	38157	7.526	0.133	0.487	0.442195
978	ARL13B_KAN566-8_6.tif:0007-0380	2.184	507.369	205	889	180.126	61.423	0.442	1108.16	42619	4.164	0.24	0.73	0.493905
979	ARL13B_KAN566-8_6.tif:0008-0414	1.924	584	327	1062	133.317	66.893	0.419	1123.68	43216	3.887	0.257	0.688	0.500823
980	ARL13B_KAN566-8_6.tif:0009-0589	3.198	716.431	359	1396	171.953	94.982	0.363	2291.28	88121	5.829	0.172	0.697	1.02122
981	ARL13B_KAN566-8_6.tif:0010-0946	1.352	607.538	314	1116	23.995	152.496	0.503	821.441	31592	2.779	0.36	0.65	0.366115
982	ARL13B_KAN566-8_6.tif:0011-1026	2.132	678.683	357	1289	182.631	165.612	0.3	1447.04	55652	6.592	0.152	0.68	0.644942
										38768.1				0.449277
1	ARL13B_KAN566-10_1.tif:0001-0070	4.238	1146.39	294	3641	62.307	11.605	0.413	4858.7	186862	3.684	0.271	0.695	2.16551
2	ARL13B_KAN566-10_1.tif:0002-0065	0.962	568.324	200	1208	11.473	10.64	0.401	546.761	21028	3.893	0.257	0.649	0.24369
3	ARL13B_KAN566-10_1.tif:0003-0071	1.768	697.868	72	1468	133.247	11.603	0.539	1233.9	47455	3.323	0.301	0.814	0.549948
4	ARL13B_KAN566-10_1.tif:0004-0103	2.86	625.473	107	1827	214.429	16.606	0.431	1788.96	68802	4.428	0.226	0.772	0.797335
5	ARL13B_KAN566-10_1.tif:0005-0192	3.978	1120.86	55	3642	66.551	30.9	0.35	4459.06	171492	4.36	0.229	0.621	1.98739
6	ARL13B_KAN566-10_1.tif:0006-0198	3.042	1308.39	308	3139	159.797	32.044	0.47	3980.37	153082	3.993	0.25	0.791	1.77404
7	ARL13B_KAN566-10_1.tif:0007-0244	1.768	648.662	173	1426	108.334	39.395	0.42	1146.9	44109	3.184	0.314	0.638	0.511172
8	ARL13B_KAN566-10_1.tif:0008-0290	2.782	618.28	147	1808	171.363	46.943	0.341	1720.16	66156	4.322	0.231	0.594	0.766671
9	ARL13B_KAN566-10_1.tif:0009-0325	1.846	743.507	380	1610	88.471	52.707	0.511	1372.6	52789	3.087	0.324	0.717	0.611763
10	ARL13B_KAN566-10_1.tif:0010-0360	3.874	754.074	95	2331	109.017	57.618	0.243	2921.46	112357	5.759	0.174	0.584	1.30209
11	ARL13B_KAN566-10_1.tif:0011-0390	1.43	643.945	202	1689	11.345	63.015	0.4	920.897	35417	2.846	0.351	0.618	0.410442
12	ARL13B_KAN566-10_1.tif:0012-0429	1.274	594.918	246	1348	215.05	69.267	0.528	757.972	29151	3.706	0.27	0.81	0.337826
13	ARL13B_KAN566-10_1.tif:0013-0482	1.716	668	297	1389	60.679	77.732	0.464	1146.36	44088	4.516	0.221	0.737	0.510929
14	ARL13B_KAN566-10_1.tif:0014-0537	1.794	651.319	142	1745	194.053	86.873	0.314	1168.54	44941	4.549	0.22	0.531	0.520814
15	ARL13B_KAN566-10_1.tif:0015-0550	2.912	848.17	154	2491	120.341	88.752	0.333	2470.02	94995	4.911	0.204	0.619	1.10088
16	ARL13B_KAN566-10_1.tif:0016-0557	1.898	1077.88	236	2674	29.96	89.864	0.473	2045.93	78685	3.818	0.262	0.709	0.911868
17	ARL13B_KAN566-10_1.tif:0017-0559	2.132	694.817	116	1915	91.028	90.208	0.397	1481.44	56975	5.496	0.182	0.788	0.660274
18	ARL13B_KAN566-10_1.tif:0018-0579	2.47	1064.57	358	2854	150.164	93.426	0.385	2629.64	101134	5.196	0.192	0.745	1.17203
19	ARL13B_KAN566-10_1.tif:0019-0649	0.728	500.143	141	1032	6.295	104.864	0.484	364.126	14004	2.746	0.364	0.636	0.16229
20	ARL13B_KAN566-10_1.tif:0020-0652	0.546	738.143	361	1347	3.551	105.254	0.453	403.05	15501	3.421	0.292	0.656	0.179639
21	ARL13B_KAN566-10_1.tif:0021-0653	1.092	565.69	144	1084	54.94	105.323	0.438	617.771	23759	4.04	0.248	0.792	0.275339
22	ARL13B_KAN566-10_1.tif:0022-0711	3.458	1328.21	96	5094	175.399	114.676	0.443	4593.23	176652	4.533	0.221	0.773	2.04719
23	ARL13B_KAN566-10_1.tif:0023-0735	2.912	1093.8	241	3122	118.131	118.501	0.409	3185.32	122505	5.166	0.194	0.778	1.41969
24	ARL13B_KAN566-10_1.tif:0024-0745	2.548	614.918	138	1629	86.65	120.288	0.384	1566.91	60262	5.17	0.193	0.71	0.698367
25	ARL13B_KAN566-10_1.tif:0025-0813	1.872	864.542	253	2001	29.233	131.219	0.427	1618.52	62247	3.985	0.251	0.758	0.72137
26	ARL13B_KAN566-10_1.tif:0026-0832	3.276	768.135	335	2179	124.554	134.086	0.287	2516.56	96785	6.924	0.144	0.61	1.12163
27	ARL13B_KAN566-10_1.tif:0027-0839	1.196	597.435	354	984	199.137	135.496	0.412	714.575	27482	4.031	0.248	0.687	0.318484
28	ARL13B_KAN566-10_1.tif:0028-0909	1.56	1088.67	362	2318	34.938	146.587	0.499	1698.42	65320	4.189	0.239	0.745	0.756983
29	ARL13B_KAN566-10_1.tif:0029-0920	1.846	1092.49	359	2334	142.176	148.406	0.556	2016.86	77567	3.494	0.286	0.811	0.898911
30	ARL13B_KAN566-10_1.tif:0030-0986	2.314	837.64	260	2343	40.795	159.111	0.257	1938.42	74550	6.989	0.143	0.597	0.863948
31	ARL13B_KAN566-10_1.tif:0031-1024	1.3	650.08	351	1096	11.526	165.068	0.387	845.155	32504	5.083	0.197	0.625	0.376684
32	ARL13B_KAN566-10_2.tif:0001-0108	3.9	1004.71	201	3793	148.742	17.587	0.274	3918.59	150706	7.797	0.128	0.668	1.74651
33	ARL13B_KAN566-10_2.tif:0002-0156	1.014	569.769	245	1218	218.496	25.045	0.552	577.781	22221	3.173	0.315	0.765	0.257516
34	ARL13B_KAN566-10_2.tif:0003-0172	2.106	1015.7	163	4151	48.728	27.712	0.498	2139.2	82272	3.88	0.258	0.753	0.953437
35	ARL13B_KAN566-10_2.tif:0004-0172	1.04	553.325	363	1060	219.651	28.033	0.358	575.493	22133	4.746	0.211	0.661	0.256496
36	ARL13B_KAN566-10_2.tif:0005-0221	1.456	872.929	218	2417	178.345	35.553	0.403	1271.06	48884	3.628	0.276	0.651	0.566509
37	ARL13B_KAN566-10_2.tif:0006-0248	2.392	571.978	245	1106	105.843	40.067	0.532	1368.25	52622	3.815	0.262	0.811	0.609828
38	ARL13B_KAN566-10_2.tif:0007-0302	1.378	894.642	351	1885	37.585	48.736	0.487	1232.89	47416	4.562	0.219	0.752	0.549496
39	ARL13B_KAN566-10_2.tif:0008-0309	2.262	1234	197	4794	197.684	49.796	0.516	2791.48	107358	2.934	0.341	0.722	1.24415
40	ARL13B_KAN566-10_2.tif:0009-0509	2.47	855.695	36	3314	214.253	82.213	0.593	2113.69	81291	2.541	0.393	0.792	0.942068
41	ARL13B_KAN566-10_2.tif:0010-0519	3.822	1676.23	280	7126	126.693	83.761	0.356	6406.94	246406	5.048	0.198	0.616	2.85556
42	ARL13B_KAN566-10_2.tif:0011-0519	1.924	542.959	328	953	25.678	83.671	0.544	1044.72	40179	3.872	0.258	0.787	0.465628
43	ARL13B_KAN566-10_2.tif:0012-0561	2.938	1172.39	235	3791	131.301	90.491	0.342	3444.69	132480	5.44	0.184	0.635	1.53529
44	ARL13B_KAN566-10_2.tif:0013-0631	2.236	869.058	118	3909	214.871	101.781	0.436	1943.33	74739	4.639	0.216	0.758	0.866138
45	ARL13B_KAN566-10_2.tif:0014-0759	1.742	482.94	340	735	93.832	122.441	0.484	841.333	32357	3.418	0.293	0.749	0.37498
46	ARL13B_KAN566-10_2.tif:0015-0798	1.794	623.884	293	1536	205.628	128.908	0.581	1119.32	43048	2.282	0.438	0.719	0.498876
47	ARL13B_KAN566-10_2.tif:0016-0800	1.118	421.047	315	567	98.361	128.878	0.397	470.758	18105	4.45	0.225	0.606	0.209816
48	ARL13B_KAN566-10_2.tif:0017-0819	2.21	867.976	226	2407	124.592	132.249	0.431	1918.34	73778	4.4	0.227	0.756	0.855001
49	ARL13B_KAN566-10_2.tif:0018-0834	1.196	417.37	139	778	26.638	134.574	0.521	499.204	19199	3.943	0.254	0.885	0.222494
50	ARL13B_KAN566-10_2.tif:0019-0939	2.028	999.718	170	2641	123.391	151.321	0.479	2027.55	77978	3.758	0.266	0.796	0.903675
51	ARL13B_KAN566-10_2.tif:0020-1028	1.924	604.77	342	1058	64.151	165.782	0.587	1163.65	44753	2.967	0.337	0.841	0.518635
52	ARL13B_KAN566-10_3.tif:0001-0059	2.158	636.169	152	1621	93.827	9.363	0.38	1372.93	52802	4.67	0.214	0.722	0.611914
53	ARL13B_KAN566-10_3.tif:0002-0062	1.274	592.857	295	1546	100.378	10.016	0.566	755.345	29050	2.158	0.463	0.7	0.336656
54	ARL13B_KAN566-10_3.tif:0003-0157	2.444	1030.35	298	2581	42.059	25.294	0.438	2518.33	96853	2.537	0.394	0.625	1.12241
55	ARL13B_KAN566-10_3.tif:0004-0191	1.43	715.018	184	1820	165.91	30.651	0.55	1022.54	39326	2.548	0.393	0.728	0.455743
56	ARL13B_KAN566-10_3.tif:0005-0291	0.884	556.5	354	949	25.852	47.038	0.543	491.976	18921	3.231	0.309	0.773	0.219272
57	ARL13B_KAN566-10_3.tif:0006-0300	2.496	651.229	300	1317	52.299	48.22	0.49	1625.57	62518	3.637	0.275	0.733	0.724511
58	ARL13B_KAN566-10_3.tif:0007-0358	3.926	1224.31	351	3384	104.653	57.951	0.524	4806.91	184870	2.873	0.348	0.722	2.14243
59	ARL13B_KAN566-10_3.tif:0008-0416	2.314	881.281	342	3014	163.391	67.2	0.378	2039.41	78434	5.237	0.191	0.674	0.908959
60	ARL13B_KAN566-10_3.tif:0009-0564	2.236	767.581	369	1633	128.295	90.9	0.406	1716.41	66012	4.536	0.22	0.708	0.765002
61	ARL13B_KAN566-10_3.tif:0010-0601	1.846	437.662	280	856	108.379	96.921	0.207	807.973	31074	5.535	0.181	0.447	0.360112
62	ARL13B_KAN566-10_3.tif:0011-0627	2.21	995.459	325	3313	176.289	101.179	0.542	2200.1	84614	3.663	0.273	0.821	0.980578
63	ARL13B_KAN566-10_3.tif:0012-0750	2.808	1505	352	3442	168.1	121.09	0.437	4226.29	162540	4.708	0.212	0.761	1.88365
64	ARL13B_KAN566-10_3.tif:0013-0785	1.092	747.571	310	1478	23.566	126.666	0.478	816.397	31398	4.112	0.243	0.724	0.363866
65	ARL13B_KAN566-10_3.tif:0014-0838	1.404	520.278	221	1386	89.353	135.205	0.225	730.514	28095	8.406	0.119	0.554	0.325588
66	ARL13B_KAN566-10_3.tif:0015-0858	1.404	494.907	179	1062	138.123	138.305	0.496	694.892	26725	3.468	0.288	0.745	0.309712
67	ARL13B_KAN566-10_3.tif:0016-0882	0.962	436.297	301	700	138.464	142.412	0.363	419.743	16143	5.398	0.185	0.655	0.187079
68	ARL13B_KAN566-10_3.tif:0017-0934	0.936	444.556	100	1018	116.691	150.625	0.365	416.129	16004	3.947	0.253	0.637	0.185468
69	ARL13B_KAN566-10_3.tif:0018-0998	1.898	655.548	352	1715	60.355	160.922	0.25	1244.31	47855	8.22	0.122	0.586	0.554584
70	ARL13B_KAN566-10_3.tif:0019-1031	2.028	435.782	69	784	182.665	166.263	0.291	883.819	33991	6.508	0.154	0.58	0.393916
71	ARL13B_KAN566-10_4.tif:0001-0057	3.25	544.84	267	1004	121.49	9.14	0.441	1770.84	68105	3.267	0.306	0.674	0.789258
72	ARL13B_KAN566-10_4.tif:0002-0129	3.302	788.181	126	2124	108.029	20.853	0.414	2602.73	100099	3.94	0.254	0.679	1.16003
73	ARL13B_KAN566-10_4.tif:0003-0178	3.198	661.634	352	1540	185.471	28.745	0.515	2116.03	81381	3.427	0.292	0.778	0.943111
74	ARL13B_KAN566-10_4.tif:0004-0199	2.782	1017.26	288	3528	50.927	32.085	0.329	2830.19	108847	5.432	0.184	0.677	1.26141
75	ARL13B_KAN566-10_4.tif:0005-0266	2.314	983.876	274	2863	84.166	42.834	0.386	2276.83	87565	5.234	0.191	0.745	1.01478
76	ARL13B_KAN566-10_4.tif:0006-0270	2.262	794.954	350	1625	63.563	43.752	0.551	1798.29	69161	3.108	0.322	0.806	0.801496
77	ARL13B_KAN566-10_4.tif:0007-0305	1.95	469.427	276	800	134.376	49.311	0.456	915.437	35207	3.632	0.275	0.67	0.408008
78	ARL13B_KAN566-10_4.tif:0008-0376	1.274	440.224	225	628	44.717	60.694	0.45	560.88	21571	4.074	0.245	0.772	0.249983
79	ARL13B_KAN566-10_4.tif:0009-0401	3.042	672.256	265	1579	67.779	64.786	0.488	2045.13	78654	2.365	0.423	0.699	0.911509
80	ARL13B_KAN566-10_4.tif:0010-0481	2.704	561.644	155	1209	188.283	77.488	0.545	1518.78	58411	3.732	0.268	0.92	0.676916
81	ARL13B_KAN566-10_4.tif:0011-0507	3.796	1288.23	297	3625	146.655	81.928	0.437	4890.4	188081	3.422	0.292	0.7	2.17964
82	ARL13B_KAN566-10_4.tif:0012-0615	3.068	799.381	278	1953	179.46	99.098	0.56	2452.65	94327	3.16	0.316	0.837	1.09314
83	ARL13B_KAN566-10_4.tif:0013-0640	2.99	611.983	351	1057	205.471	103.288	0.415	1829.94	70378	4.99	0.2	0.752	0.815599
84	ARL13B_KAN566-10_4.tif:0014-0646	1.612	603.871	360	952	5.925	104.29	0.456	973.499	37440	4.739	0.211	0.849	0.433886
85	ARL13B_KAN566-10_4.tif:0015-0805	3.354	891.543	337	2134	39.166	129.889	0.485	2990.41	115009	4.331	0.231	0.84	1.33282
86	ARL13B_KAN566-10_4.tif:0016-0815	2.496	630.469	354	1070	138.803	131.521	0.555	1573.74	60525	3.241	0.309	0.8	0.701414
87	ARL13B_KAN566-10_4.tif:0017-0816	2.496	522.365	351	925	169.564	131.637	0.313	1303.9	50147	6.77	0.148	0.634	0.581146
88	ARL13B_KAN566-10_4.tif:0018-0842	2.132	859.073	355	3181	85.632	135.837	0.348	1831.65	70444	5.776	0.173	0.689	0.816364
89	ARL13B_KAN566-10_4.tif:0019-0947	2.73	1073.46	216	3273	197.905	152.998	0.44	2930.71	112713	3.415	0.293	0.709	1.30621
90	ARL13B_KAN566-10_4.tif:0020-0951	2.028	550.808	354	950	73.536	153.179	0.352	1117.11	42963	5.173	0.193	0.639	0.497891
91	ARL13B_KAN566-10_4.tif:0021-0970	2.73	805.105	351	2401	134.053	156.671	0.342	2198.07	84536	5.896	0.17	0.695	0.979674
92	ARL13B_KAN566-10_5.tif:0001-0064	2.496	1139.88	167	2622	66.294	10.056	0.374	2845.32	109429	4.147	0.241	0.604	1.26816
93	ARL13B_KAN566-10_5.tif:0002-0063	1.196	705.043	316	1540	41.603	10.229	0.489	843.283	32432	2.797	0.358	0.748	0.375849
94	ARL13B_KAN566-10_5.tif:0003-0073	0.65	504.44	187	905	43.741	11.62	0.514	327.906	12611	1.887	0.53	0.694	0.146147
95	ARL13B_KAN566-10_5.tif:0004-0125	0.572	349	108	552	175.308	20.156	0.576	199.64	7678	3.237	0.309	0.772	0.0889791
96	ARL13B_KAN566-10_5.tif:0005-0135	2.73	621.99	287	1368	74.18	21.806	0.47	1698.14	65309	4.49	0.223	0.83	0.756856
97	ARL13B_KAN566-10_5.tif:0006-0196	1.612	630.387	148	1822	10.765	31.524	0.329	1016.25	39084	4.824	0.207	0.577	0.452938
98	ARL13B_KAN566-10_5.tif:0007-0247	4.628	900.258	220	2660	114.55	40.185	0.318	4166.65	160246	5.623	0.178	0.719	1.85707
99	ARL13B_KAN566-10_5.tif:0008-0315	2.574	625.01	304	1736	63.03	50.759	0.303	1608.87	61876	6.095	0.164	0.643	0.717071
100	ARL13B_KAN566-10_5.tif:0009-0336	2.99	1235.1	110	3668	114.91	53.897	0.439	3693.18	142037	3.318	0.301	0.695	1.64604
101	ARL13B_KAN566-10_5.tif:0010-0392	2.73	749.524	151	2381	154.941	63.192	0.463	2046.32	78700	3.598	0.278	0.727	0.912042
102	ARL13B_KAN566-10_5.tif:0011-0447	3.198	711.122	199	1609	24.343	72.07	0.371	2274.3	87468	4.763	0.21	0.653	1.01365
103	ARL13B_KAN566-10_5.tif:0012-0476	2.938	683.513	338	1414	114.545	76.654	0.338	2008.28	77237	3.467	0.288	0.572	0.895087
104	ARL13B_KAN566-10_5.tif:0013-0525	1.82	629.629	329	1572	78.397	84.656	0.492	1145.99	44074	3.66	0.273	0.737	0.510767
105	ARL13B_KAN566-10_5.tif:0014-0525	2.106	507.049	138	963	158.635	84.737	0.233	1067.91	41071	7.081	0.141	0.572	0.475965
106	ARL13B_KAN566-10_5.tif:0015-0536	4.16	948.156	184	2463	105.012	86.604	0.261	3944.57	151705	8.208	0.122	0.696	1.75808
107	ARL13B_KAN566-10_5.tif:0016-0573	1.3	433.42	244	641	222.512	92.612	0.414	563.48	21671	4.018	0.249	0.735	0.251142
108	ARL13B_KAN566-10_5.tif:0017-0580	2.522	1202.09	76	3968	141.685	93.223	0.555	3031.86	116603	1.535	0.651	0.713	1.35129
109	ARL13B_KAN566-10_5.tif:0018-0616	3.302	666.874	307	1469	158.692	99.475	0.382	2202.15	84693	5.086	0.197	0.7	0.981494
110	ARL13B_KAN566-10_5.tif:0019-0634	1.82	658.8	247	1688	70.565	102.12	0.229	1199.09	46116	4.231	0.236	0.444	0.534431
111	ARL13B_KAN566-10_5.tif:0020-0667	1.014	613.897	363	1324	41.724	107.717	0.543	622.529	23942	3.443	0.29	0.743	0.27746
112	ARL13B_KAN566-10_5.tif:0021-0672	2.99	862.687	105	1895	92.853	108.146	0.48	2579.59	99209	3.556	0.281	0.767	1.14972
113	ARL13B_KAN566-10_5.tif:0022-0710	2.626	906.941	274	2645	184.444	114.71	0.323	2381.77	91601	6.167	0.162	0.643	1.06155
114	ARL13B_KAN566-10_5.tif:0023-0831	0.52	384.15	178	527	24.292	134.063	0.431	199.77	7683	2.407	0.415	0.588	0.0890371
115	ARL13B_KAN566-10_5.tif:0024-0846	0.806	669.29	289	1098	223.292	136.477	0.522	539.48	20748	2.761	0.362	0.756	0.240445
116	ARL13B_KAN566-10_5.tif:0025-0880	1.612	895.403	360	1493	146.402	141.895	0.387	1443.48	55515	5.272	0.19	0.721	0.643354
117	ARL13B_KAN566-10_5.tif:0026-0975	1.404	736.037	116	2055	150.109	157.117	0.401	1033.46	39746	3.268	0.306	0.632	0.46061
118	ARL13B_KAN566-10_5.tif:0027-1026	1.586	494.131	54	989	81.763	165.404	0.381	783.739	30142	3.901	0.256	0.619	0.349311
119	ARL13B_KAN566-10_6:0001-0019	1.768	762.868	208	2039	88.944	2.933	0.489	1348.83	51875	2.6	0.385	0.701	0.601171
120	ARL13B_KAN566-10_6:0002-0121	2.002	683.377	163	2045	194.016	19.718	0.401	1368.2	52620	3.888	0.257	0.623	0.609805
121	ARL13B_KAN566-10_6:0003-0182	3.068	787.339	257	1960	57.35	29.429	0.422	2415.7	92906	4.414	0.227	0.731	1.07667
122	ARL13B_KAN566-10_6:0004-0239	2.418	632.495	128	1867	145.684	38.788	0.257	1529.46	58822	7.459	0.134	0.531	0.681679
123	ARL13B_KAN566-10_6:0005-0334	0.728	526.107	364	1023	22.235	54.065	0.304	383.029	14731	6.591	0.152	0.596	0.170715
124	ARL13B_KAN566-10_6:0006-0369	1.3	677.64	126	1511	53.342	59.608	0.49	880.985	33882	2.713	0.369	0.676	0.392653
125	ARL13B_KAN566-10_6:0007-0389	2.21	876.706	310	2537	129.424	62.752	0.411	1937.64	74520	4.916	0.203	0.759	0.8636
126	ARL13B_KAN566-10_6:0008-0402	1.17	629.933	350	1054	213.336	64.831	0.363	737.066	28347	5.666	0.176	0.643	0.328509
127	ARL13B_KAN566-10_6:0009-0497	1.534	699.729	71	1746	65.786	80.266	0.276	1073.45	41284	5.342	0.187	0.587	0.478434
128	ARL13B_KAN566-10_6:0010-0525	2.678	717.184	202	1366	194.235	84.546	0.239	1920.74	73870	5.085	0.197	0.5	0.856068
129	ARL13B_KAN566-10_6:0011-0548	2.184	1628.71	301	5028	183.527	88.304	0.402	3557.33	136812	4.386	0.228	0.753	1.58549
130	ARL13B_KAN566-10_6:0012-0729	2.678	1059.67	128	2091	69.125	117.491	0.27	2837.97	109146	3.317	0.301	0.498	1.26488
131	ARL13B_KAN566-10_6:0013-0740	3.042	795.402	136	3063	143.954	119.433	0.423	2419.76	93062	4.886	0.205	0.788	1.07848
132	ARL13B_KAN566-10_6:0014-0891	0.702	382.667	208	543	25.218	143.725	0.475	268.648	10332	3.685	0.271	0.771	0.119736
133	ARL13B_KAN566-10_6:0015-0907	2.028	1188.38	352	2820	67.196	146.33	0.408	2410.19	92694	5.526	0.181	0.719	1.07422
134	ARL13B_KAN566-10_6:0016-0927	1.95	780.787	228	1983	115.452	149.228	0.316	1522.63	58559	5.284	0.189	0.658	0.678631
135	ARL13B_KAN566-10_6:0017-0939	1.014	692.923	352	1444	177.749	151.304	0.438	702.666	27024	4.49	0.223	0.655	0.313177
136	ARL13B_KAN566-10_6:0018-1035	0.988	712.053	220	1476	140.22	167.004	0.318	703.55	27058	5.548	0.18	0.752	0.313571
137	ARL13B_KAN566-10_7.tif:0001-0019	1.768	762.868	208	2039	88.944	2.933	0.489	1348.83	51875	2.6	0.385	0.701	0.601171
138	ARL13B_KAN566-10_7.tif:0002-0121	2.002	683.377	163	2045	194.016	19.718	0.401	1368.2	52620	3.888	0.257	0.623	0.609805
139	ARL13B_KAN566-10_7.tif:0003-0182	3.068	787.339	257	1960	57.35	29.429	0.422	2415.7	92906	4.414	0.227	0.731	1.07667
140	ARL13B_KAN566-10_7.tif:0004-0239	2.418	632.495	128	1867	145.684	38.788	0.257	1529.46	58822	7.459	0.134	0.531	0.681679
141	ARL13B_KAN566-10_7.tif:0005-0334	0.728	526.107	364	1023	22.235	54.065	0.304	383.029	14731	6.591	0.152	0.596	0.170715
142	ARL13B_KAN566-10_7.tif:0006-0369	1.3	677.64	126	1511	53.342	59.608	0.49	880.985	33882	2.713	0.369	0.676	0.392653
143	ARL13B_KAN566-10_7.tif:0007-0389	2.21	876.706	310	2537	129.424	62.752	0.411	1937.64	74520	4.916	0.203	0.759	0.8636
144	ARL13B_KAN566-10_7.tif:0008-0402	1.17	629.933	350	1054	213.336	64.831	0.363	737.066	28347	5.666	0.176	0.643	0.328509
145	ARL13B_KAN566-10_7.tif:0009-0497	1.534	699.729	71	1746	65.786	80.266	0.276	1073.45	41284	5.342	0.187	0.587	0.478434
146	ARL13B_KAN566-10_7.tif:0010-0525	2.678	717.184	202	1366	194.235	84.546	0.239	1920.74	73870	5.085	0.197	0.5	0.856068
147	ARL13B_KAN566-10_7.tif:0011-0548	2.184	1628.71	301	5028	183.527	88.304	0.402	3557.33	136812	4.386	0.228	0.753	1.58549
148	ARL13B_KAN566-10_7.tif:0012-0729	2.678	1059.67	128	2091	69.125	117.491	0.27	2837.97	109146	3.317	0.301	0.498	1.26488
149	ARL13B_KAN566-10_7.tif:0013-0740	3.042	795.402	136	3063	143.954	119.433	0.423	2419.76	93062	4.886	0.205	0.788	1.07848
150	ARL13B_KAN566-10_7.tif:0014-0891	0.702	382.667	208	543	25.218	143.725	0.475	268.648	10332	3.685	0.271	0.771	0.119736
151	ARL13B_KAN566-10_7.tif:0015-0907	2.028	1188.38	352	2820	67.196	146.33	0.408	2410.19	92694	5.526	0.181	0.719	1.07422
152	ARL13B_KAN566-10_7.tif:0016-0927	1.95	780.787	228	1983	115.452	149.228	0.316	1522.63	58559	5.284	0.189	0.658	0.678631
153	ARL13B_KAN566-10_7.tif:0017-0939	1.014	692.923	352	1444	177.749	151.304	0.438	702.666	27024	4.49	0.223	0.655	0.313177
154	ARL13B_KAN566-10_7.tif:0018-1035	0.988	712.053	220	1476	140.22	167.004	0.318	703.55	27058	5.548	0.18	0.752	0.313571
										67033				0.776835
155	ARL13B_KAN566-11_1.tif:0001-0012	3.64	940.614	90	3137	102.03	2.199	0.412	3424.04	131686	3.361	0.298	0.645	1.52609
156	ARL13B_KAN566-11_1.tif:0002-0042	3.432	1369.24	269	3272	53.5	6.537	0.383	4699.52	180740	3.686	0.271	0.635	2.09457
157	ARL13B_KAN566-11_1.tif:0003-0072	1.638	586.825	354	1472	1.214	11.637	0.355	961.278	36970	5.934	0.169	0.653	0.428439
158	ARL13B_KAN566-11_1.tif:0004-0074	2.236	834.174	355	1651	37.099	11.841	0.283	1865.33	71739	4.886	0.205	0.551	0.831372
159	ARL13B_KAN566-11_1.tif:0005-0120	2.106	671.469	308	1754	138.797	19.263	0.364	1414.2	54389	5.408	0.185	0.711	0.630305
160	ARL13B_KAN566-11_1.tif:0006-0139	4.498	1750.31	173	5028	156.694	22.488	0.407	7873.38	302804	3.684	0.271	0.715	3.50915
161	ARL13B_KAN566-11_1.tif:0007-0206	3.042	843.667	230	2253	175.829	33.342	0.315	2566.59	98709	6.439	0.155	0.713	1.14392
162	ARL13B_KAN566-11_1.tif:0008-0232	2.574	1037.81	199	3065	39.689	37.499	0.455	2671.48	102743	3.264	0.306	0.705	1.19067
163	ARL13B_KAN566-11_1.tif:0009-0258	2.808	1083.99	205	2871	60.602	41.776	0.466	3044.03	117071	3.064	0.326	0.667	1.35672
164	ARL13B_KAN566-11_1.tif:0010-0326	2.626	467.743	298	780	12.859	52.493	0.58	1228.37	47242	3.184	0.314	0.828	0.54748
165	ARL13B_KAN566-11_1.tif:0011-0363	2.444	685.638	228	1726	198.677	58.712	0.266	1675.8	64450	6.621	0.151	0.651	0.746901
166	ARL13B_KAN566-11_1.tif:0012-0389	3.016	691.371	140	1809	148.593	62.718	0.445	2085.3	80199	4.508	0.222	0.789	0.929413
167	ARL13B_KAN566-11_1.tif:0013-0385	2.756	484.33	237	951	116.048	62.049	0.325	1334.89	51339	5.46	0.183	0.729	0.594959
168	ARL13B_KAN566-11_1.tif:0014-0404	1.534	641.424	352	1179	2.005	65.31	0.323	984.003	37844	4.509	0.222	0.57	0.438568
169	ARL13B_KAN566-11_1.tif:0015-0429	4.446	1154.95	0	3334	24.753	69.542	0.494	5135.23	197497	1.152	0.868	0.692	2.28876
170	ARL13B_KAN566-11_1.tif:0016-0458	2.782	527.523	165	901	167.723	73.754	0.421	1467.66	56445	3.151	0.317	0.648	0.654132
171	ARL13B_KAN566-11_1.tif:0017-0474	2.314	678.899	88	1373	97.51	76.303	0.357	1571.07	60422	4.502	0.222	0.601	0.700221
172	ARL13B_KAN566-11_1.tif:0018-0481	3.172	1216.81	130	3637	45.445	77.404	0.354	3859.96	148451	3.245	0.308	0.605	1.72037
173	ARL13B_KAN566-11_1.tif:0019-0691	1.404	436.667	300	660	3.374	111.128	0.159	613.117	23580	8.3	0.12	0.427	0.273265
174	ARL13B_KAN566-11_1.tif:0020-0695	2.002	595.299	233	1284	154.309	112.179	0.353	1191.86	45838	6.45	0.155	0.73	0.531209
175	ARL13B_KAN566-11_1.tif:0021-0742	2.08	977.8	351	1933	29.64	119.682	0.373	2033.95	78224	5.624	0.178	0.755	0.906525
176	ARL13B_KAN566-11_1.tif:0022-0739	1.534	514.864	330	892	92.78	119.015	0.579	789.85	30377	2.237	0.447	0.742	0.352034
177	ARL13B_KAN566-11_1.tif:0023-0754	3.796	1378.75	50	3118	77.337	121.389	0.307	5234.04	201297	5.5	0.182	0.658	2.3328
178	ARL13B_KAN566-11_1.tif:0024-0782	2.288	929.193	0	2385	217.129	126.209	0.549	2126.12	81769	1.842	0.543	0.713	0.947608
179	ARL13B_KAN566-11_1.tif:0025-0854	2.548	792.755	188	2020	185.888	138.005	0.427	2020.06	77690	3.056	0.327	0.656	0.900337
180	ARL13B_KAN566-11_1.tif:0026-0896	3.146	657.463	351	1105	201.062	144.583	0.337	2068.5	79553	6.253	0.16	0.71	0.921927
181	ARL13B_KAN566-11_1.tif:0027-1033	0.728	828.107	193	2008	222.542	166.715	0.575	602.898	23187	1.888	0.53	0.691	0.26871
182	ARL13B_KAN566-11_2.tif:0001-0018	2.34	695.211	355	1388	153.204	3.026	0.522	1626.89	62569	3.533	0.283	0.807	0.725102
183	ARL13B_KAN566-11_2.tif:0002-0071	2.392	1069.74	350	2374	123.526	11.235	0.468	2558.97	98416	3.719	0.269	0.739	1.14053
184	ARL13B_KAN566-11_2.tif:0003-0098	1.43	414.982	296	533	216.792	15.912	0.268	593.46	22824	5.61	0.178	0.514	0.264504
185	ARL13B_KAN566-11_2.tif:0004-0131	1.612	490.113	300	761	177.336	21.064	0.545	790.11	30387	3.003	0.333	0.729	0.35215
186	ARL13B_KAN566-11_2.tif:0005-0148	3.562	1466.61	215	3937	99.961	23.974	0.32	5224.39	200926	7.021	0.142	0.745	2.3285
187	ARL13B_KAN566-11_2.tif:0006-0167	2.522	563.423	64	1208	55.323	26.964	0.45	1421.04	54652	4.443	0.225	0.785	0.633353
188	ARL13B_KAN566-11_2.tif:0007-0275	2.678	426.155	206	644	121.895	44.398	0.256	1141.31	43894	4.648	0.215	0.555	0.508681
189	ARL13B_KAN566-11_2.tif:0008-0352	1.846	452.268	281	815	160.479	56.511	0.371	834.936	32111	4.727	0.212	0.64	0.372129
190	ARL13B_KAN566-11_2.tif:0009-0399	3.12	1107.85	217	2598	83.999	64.375	0.47	3456.7	132942	4.348	0.23	0.787	1.54064
191	ARL13B_KAN566-11_2.tif:0010-0495	2.6	561.46	266	1102	130.271	79.978	0.266	1459.88	56146	6.622	0.151	0.592	0.650667
192	ARL13B_KAN566-11_2.tif:0011-0526	3.588	868.254	261	2121	159.981	84.691	0.492	3115.48	119819	3.211	0.311	0.723	1.38856
193	ARL13B_KAN566-11_2.tif:0012-0558	0.858	442.727	350	593	49.619	90.063	0.33	379.883	14610	6.563	0.152	0.641	0.169313
194	ARL13B_KAN566-11_2.tif:0013-0569	3.536	887.199	267	2021	187.576	92	0.252	3137.32	120659	7.03	0.142	0.607	1.3983
195	ARL13B_KAN566-11_2.tif:0014-0671	2.366	734.956	255	1964	178.094	108.056	0.537	1739.01	66881	2.458	0.407	0.755	0.775073
196	ARL13B_KAN566-11_2.tif:0015-0723	2.912	892.759	204	1823	104.707	116.862	0.282	2599.87	99989	6.585	0.152	0.615	1.15876
197	ARL13B_KAN566-11_2.tif:0016-0730	1.17	664.533	207	1506	54.164	117.678	0.347	777.551	29904	4.782	0.209	0.726	0.346553
198	ARL13B_KAN566-11_2.tif:0017-0800	2.002	468.13	175	724	220.266	129.61	0.259	937.252	36046	3.357	0.298	0.478	0.417731
199	ARL13B_KAN566-11_2.tif:0018-0857	2.158	609.976	355	1356	201.523	138.509	0.256	1316.41	50628	5.409	0.185	0.474	0.58672
200	ARL13B_KAN566-11_2.tif:0019-0876	2.392	1865.93	184	5203	123.356	141.134	0.389	4463.59	171666	4.209	0.238	0.662	1.98941
201	ARL13B_KAN566-11_2.tif:0020-0913	3.042	632.214	329	1187	162.986	147.393	0.408	1923.31	73969	5.117	0.195	0.785	0.857215
202	ARL13B_KAN566-11_2.tif:0021-0936	1.69	742.185	350	1465	13.196	151.088	0.35	1254.37	48242	4.668	0.214	0.625	0.559069
203	ARL13B_KAN566-11_2.tif:0022-0973	2.548	740.99	359	1265	25.188	156.867	0.312	1888.16	72617	6.983	0.143	0.723	0.841547
204	ARL13B_KAN566-11_2.tif:0023-0983	1.768	913.618	351	2078	183.334	158.532	0.455	1615.37	62126	5.079	0.197	0.756	0.719968
205	ARL13B_KAN566-11_2.tif:0024-1010	2.626	900.198	350	2274	46.323	162.865	0.352	2364.06	90920	6.584	0.152	0.765	1.05366
206	ARL13B_KAN566-11_3.tif:0001-0019	3.38	1097.85	203	2771	155.408	3.281	0.372	3710.94	142720	5.058	0.198	0.703	1.65396
207	ARL13B_KAN566-11_3.tif:0002-0056	2.158	530.325	357	910	193.52	9.101	0.387	1144.51	44017	4.733	0.211	0.601	0.510106
208	ARL13B_KAN566-11_3.tif:0003-0140	3.744	1475.33	216	3645	159.533	22.291	0.365	5523.95	212447	4.143	0.241	0.623	2.46201
209	ARL13B_KAN566-11_3.tif:0004-0152	4.212	1626.7	173	4424	77.39	24.618	0.325	6852.06	263525	5.339	0.187	0.689	3.05395
210	ARL13B_KAN566-11_3.tif:0005-0217	1.014	350.282	116	509	120.749	35.047	0.42	355.207	13661	3.689	0.271	0.709	0.158315
211	ARL13B_KAN566-11_3.tif:0006-0240	1.482	439.439	319	606	186.33	38.676	0.534	651.287	25048	3.455	0.289	0.77	0.290277
212	ARL13B_KAN566-11_3.tif:0007-0292	0.806	535.548	362	890	48.523	47.327	0.406	431.678	16602	3.889	0.257	0.697	0.192398
213	ARL13B_KAN566-11_3.tif:0008-0330	2.08	964.75	149	2012	193.867	53.285	0.456	2006.8	77180	4.837	0.207	0.821	0.894427
214	ARL13B_KAN566-11_3.tif:0009-0366	2.808	1214.12	254	2723	160.147	59.016	0.415	3409.45	131125	4.673	0.214	0.745	1.51959
215	ARL13B_KAN566-11_3.tif:0010-0443	3.146	1079.14	171	2337	43.859	71.492	0.317	3395.18	130576	4.817	0.208	0.595	1.51322
216	ARL13B_KAN566-11_3.tif:0011-0464	3.146	1018.94	81	3222	192.375	74.717	0.365	3205.78	123292	4.586	0.218	0.689	1.42881
217	ARL13B_KAN566-11_3.tif:0012-0465	3.25	848.368	356	1507	41.163	74.933	0.318	2757.36	106046	6.948	0.144	0.753	1.22895
218	ARL13B_KAN566-11_3.tif:0013-0615	2.028	619.218	354	1117	190.604	99.264	0.516	1255.85	48299	3.808	0.263	0.754	0.559729
219	ARL13B_KAN566-11_3.tif:0014-0626	2.132	560.89	294	960	155.392	100.917	0.486	1195.89	45993	4.138	0.242	0.788	0.533005
220	ARL13B_KAN566-11_3.tif:0015-0684	1.326	902.49	354	1563	61.235	110.281	0.4	1196.77	46027	5.393	0.185	0.756	0.5334
221	ARL13B_KAN566-11_3.tif:0016-0713	2.522	1254.23	125	3022	138.402	115.185	0.391	3163.35	121660	5.231	0.191	0.729	1.4099
222	ARL13B_KAN566-11_3.tif:0017-0750	2.938	1584.22	207	3891	119.681	121.074	0.322	4654.72	179017	4.614	0.217	0.621	2.0746
223	ARL13B_KAN566-11_3.tif:0018-0811	2.106	571.765	352	903	21.346	130.884	0.207	1204.21	46313	7.901	0.127	0.521	0.536714
224	ARL13B_KAN566-11_3.tif:0019-0870	2.314	798.787	178	1750	159.263	140.446	0.221	1848.5	71092	9.066	0.11	0.62	0.823874
225	ARL13B_KAN566-11_3.tif:0020-0879	1.794	740.783	183	1911	86.854	141.719	0.567	1329.04	51114	3.757	0.266	0.78	0.592352
226	ARL13B_KAN566-11_3.tif:0021-0975	2.314	910.27	350	1722	69.849	157.31	0.338	2106.49	81014	7.031	0.142	0.742	0.938858
227	ARL13B_KAN566-11_3.tif:0022-0998	3.302	750.079	357	1625	192.519	161.003	0.268	2476.91	95260	6.314	0.158	0.612	1.10395
228	ARL13B_KAN566-11_3.tif:0023-0999	0.52	504.2	356	750	148.568	161.218	0.444	262.2	10084	4.774	0.209	0.678	0.116862
229	ARL13B_KAN566-11_4.tif:0001-0113	2.314	572.989	351	924	21.15	18.305	0.373	1325.98	50996	5.04	0.198	0.757	0.590984
230	ARL13B_KAN566-11_4.tif:0002-0166	2.002	747.299	0	2146	24.228	26.921	0.392	1496.18	57542	4.512	0.222	0.616	0.666845
231	ARL13B_KAN566-11_4.tif:0003-0222	1.872	947.375	356	1616	5.131	35.757	0.327	1773.59	68211	6.852	0.146	0.702	0.790486
232	ARL13B_KAN566-11_4.tif:0004-0266	1.846	605.465	164	1147	182.191	42.816	0.29	1117.76	42988	2.935	0.341	0.488	0.498181
233	ARL13B_KAN566-11_4.tif:0005-0468	3.38	868.669	354	1898	203.418	75.618	0.335	2936.28	112927	5.319	0.188	0.66	1.30869
234	ARL13B_KAN566-11_4.tif:0006-0538	3.068	695.627	261	1260	219.278	87.111	0.385	2134.31	82084	4.674	0.214	0.7	0.951258
235	ARL13B_KAN566-11_4.tif:0007-0593	3.484	944.873	290	2570	127.93	95.783	0.284	3292.14	126613	7.456	0.134	0.734	1.4673
236	ARL13B_KAN566-11_4.tif:0008-0618	1.768	533.338	88	1099	70.386	99.541	0.29	942.999	36267	4.443	0.225	0.509	0.420292
237	ARL13B_KAN566-11_4.tif:0009-0654	2.34	997.2	171	2066	50.21	105.309	0.462	2333.59	89748	3.158	0.317	0.729	1.04008
238	ARL13B_KAN566-11_4.tif:0010-0691	1.56	572.467	298	1081	19.831	111.633	0.361	893.102	34348	3.855	0.259	0.606	0.398053
239	ARL13B_KAN566-11_4.tif:0011-0833	2.106	1123.22	172	3092	166.739	134.392	0.457	2365.65	90981	4.031	0.248	0.726	1.05436
240	ARL13B_KAN566-11_4.tif:0012-0847	2.678	902.146	351	1680	54.66	136.747	0.32	2416.09	92921	6.079	0.164	0.652	1.07685
241	ARL13B_KAN566-11_4.tif:0013-0938	2.028	750	358	1511	81.559	151.25	0.437	1521.09	58500	4.252	0.235	0.684	0.677947
242	ARL13B_KAN566-11_4.tif:0014-0961	1.482	505.772	178	1009	178.545	154.923	0.269	749.599	28829	5.563	0.18	0.76	0.334095
243	ARL13B_KAN566-11_5.tif:0001-0021	2.6	917.87	157	2990	108.692	3.523	0.354	2386.61	91787	5.27	0.19	0.662	1.0637
244	ARL13B_KAN566-11_5.tif:0002-0040	0.806	612.71	227	1096	24.559	6.26	0.439	493.874	18994	2.405	0.416	0.579	0.220118
245	ARL13B_KAN566-11_5.tif:0003-0098	1.95	429.12	260	689	71.084	15.995	0.31	836.834	32184	5.771	0.173	0.636	0.372975
246	ARL13B_KAN566-11_5.tif:0004-0208	1.274	583.388	168	1063	161.696	33.703	0.445	743.281	28586	2.833	0.353	0.649	0.331279
247	ARL13B_KAN566-11_5.tif:0005-0262	1.17	484.511	275	840	46.001	42.142	0.398	566.912	21803	3.674	0.272	0.616	0.252671
248	ARL13B_KAN566-11_5.tif:0006-0320	2.834	1009.48	323	2910	132.511	51.593	0.421	2861.03	110033	4.697	0.213	0.762	1.27515
249	ARL13B_KAN566-11_5.tif:0007-0330	3.744	1092.22	29	3194	163.598	53.391	0.516	4089.53	157280	4.082	0.245	0.873	1.82269
250	ARL13B_KAN566-11_5.tif:0008-0388	2.938	859.354	50	2512	210.883	62.644	0.391	2524.93	97107	4.843	0.206	0.793	1.12536
251	ARL13B_KAN566-11_5.tif:0009-0515	3.068	882.449	352	1895	47.828	82.91	0.505	2707.52	104129	3.662	0.273	0.784	1.20673
252	ARL13B_KAN566-11_5.tif:0010-0524	3.172	1246.71	102	3324	105.229	84.693	0.418	3954.81	152099	3.654	0.274	0.667	1.76265
253	ARL13B_KAN566-11_5.tif:0011-0597	2.912	729.991	350	1650	141.71	96.343	0.471	2125.86	81759	4.3	0.233	0.744	0.947492
254	ARL13B_KAN566-11_5.tif:0012-0600	2.704	763.471	65	1982	148.428	96.758	0.368	2064.55	79401	6.276	0.159	0.822	0.920165
255	ARL13B_KAN566-11_5.tif:0013-0651	2.73	843.333	307	1694	105.176	104.971	0.411	2302.44	88550	5.56	0.18	0.787	1.02619
256	ARL13B_KAN566-11_5.tif:0014-0702	2.574	1352.78	111	4366	155.044	113.171	0.596	3482.26	133925	2.443	0.409	0.756	1.55204
257	ARL13B_KAN566-11_5.tif:0015-0707	1.56	460.367	334	710	9.017	113.732	0.383	718.215	27622	3.793	0.264	0.69	0.320107
258	ARL13B_KAN566-11_5.tif:0016-0717	2.652	461.873	228	853	192.714	115.795	0.289	1224.96	47111	7.242	0.138	0.723	0.545962
259	ARL13B_KAN566-11_5.tif:0017-0735	3.016	666.862	89	1996	211.978	118.413	0.279	2011.38	77356	3.812	0.262	0.483	0.896466
260	ARL13B_KAN566-11_5.tif:0018-0751	2.6	1241.87	350	2581	69.012	121.273	0.481	3229.06	124187	3.525	0.284	0.738	1.43918
261	ARL13B_KAN566-11_5.tif:0019-0844	3.666	1161.78	215	3113	82.708	135.934	0.418	4259.34	163811	4.064	0.246	0.7	1.89838
262	ARL13B_KAN566-11_5.tif:0020-0869	3.744	650.319	357	1308	221.169	139.954	0.468	2434.94	93646	3.782	0.264	0.744	1.08525
263	ARL13B_KAN566-11_5.tif:0021-0920	2.834	865.862	131	1633	146.303	148.299	0.295	2454	94379	5.339	0.187	0.639	1.09374
264	ARL13B_KAN566-11_5.tif:0022-0957	1.794	422.217	327	622	99.266	154.467	0.377	757.504	29133	5.082	0.197	0.693	0.337618
265	ARL13B_KAN566-11_5.tif:0023-0969	1.404	430.833	355	601	4.306	156.32	0.322	604.926	23265	4.663	0.214	0.565	0.269614
266	ARL13B_KAN566-11_5.tif:0024-1027	1.82	515.6	185	965	198.266	165.811	0.503	938.449	36092	2.402	0.416	0.697	0.418264
267	ARL13B_KAN566-11_5.tif:0025-1027	1.612	683.387	300	1368	3.267	165.635	0.3	1101.69	42370	7.271	0.138	0.689	0.491019
268	ARL13B_KAN566-11_6.tif:0001-0043	4.342	1181.77	142	3441	79.635	7.331	0.354	5131.56	197356	4.361	0.229	0.637	2.28713
269	ARL13B_KAN566-11_6.tif:0002-0067	4.316	1413.73	274	3701	130.08	10.868	0.422	6102.02	234679	5.083	0.197	0.814	2.71966
270	ARL13B_KAN566-11_6.tif:0003-0093	1.898	663.795	325	1524	200.539	15.039	0.252	1259.96	48457	8.298	0.121	0.667	0.56156
271	ARL13B_KAN566-11_6.tif:0004-0148	3.692	1188.39	354	2872	208.16	23.759	0.404	4387.82	168752	4.652	0.215	0.717	1.95564
272	ARL13B_KAN566-11_6.tif:0005-0173	3.874	555.664	349	960	200.08	27.823	0.429	2152.77	82794	4.249	0.235	0.764	0.959486
273	ARL13B_KAN566-11_6.tif:0006-0204	2.236	504.581	174	931	129.739	33.124	0.272	1128.31	43394	2.193	0.456	0.444	0.502886
274	ARL13B_KAN566-11_6.tif:0007-0217	1.586	453.262	270	655	85.155	35.207	0.401	718.917	27649	2.985	0.335	0.589	0.32042
275	ARL13B_KAN566-11_6.tif:0008-0226	1.534	726.424	336	1649	39.486	36.422	0.542	1114.4	42859	3.271	0.306	0.814	0.496686
276	ARL13B_KAN566-11_6.tif:0009-0261	0.936	392.917	311	549	200.461	42.153	0.218	367.792	14145	9.546	0.105	0.605	0.163924
277	ARL13B_KAN566-11_6.tif:0010-0328	2.158	811.819	341	2657	125.553	52.908	0.36	1752.01	67381	6.12	0.163	0.686	0.780868
278	ARL13B_KAN566-11_6.tif:0011-0351	3.484	874.784	352	1586	193.956	56.625	0.451	3047.93	117221	4.412	0.227	0.795	1.35846
279	ARL13B_KAN566-11_6.tif:0012-0374	2.99	986.287	267	2451	90.285	60.204	0.366	2949.18	113423	4.97	0.201	0.678	1.31444
280	ARL13B_KAN566-11_6.tif:0013-0416	0.806	460.645	212	799	74.074	67.14	0.513	371.302	14280	3.321	0.301	0.738	0.165489
281	ARL13B_KAN566-11_6.tif:0014-0476	1.3	1049.96	364	2284	18.779	76.787	0.599	1365.03	52498	2.821	0.354	0.769	0.608391
282	ARL13B_KAN566-11_6.tif:0015-0506	2.652	1461.36	200	3273	72.242	81.811	0.519	3875.77	149059	2.634	0.38	0.699	1.72742
283	ARL13B_KAN566-11_6.tif:0016-0612	1.378	507.038	351	749	116.774	98.677	0.595	698.74	26873	2.076	0.482	0.763	0.311427
284	ARL13B_KAN566-11_6.tif:0017-0616	2.08	457.25	321	676	185.405	99.276	0.437	951.137	36580	4.09	0.244	0.727	0.42392
285	ARL13B_KAN566-11_6.tif:0018-0615	1.612	954.71	390	1784	216.395	99.231	0.456	1539.09	59192	4.697	0.213	0.743	0.685967
286	ARL13B_KAN566-11_6.tif:0019-0627	2.106	1140.74	261	2378	12.825	101.391	0.377	2402.55	92400	4.126	0.242	0.667	1.07081
287	ARL13B_KAN566-11_6.tif:0020-0715	2.574	936.667	169	2232	107.625	115.505	0.374	2411.12	92730	4.68	0.214	0.639	1.07463
288	ARL13B_KAN566-11_6.tif:0021-0744	3.9	650.113	344	1634	90.865	120.023	0.417	2535.59	97517	4.885	0.205	0.809	1.13011
289	ARL13B_KAN566-11_6.tif:0022-0768	3.536	1931.1	354	5120	73.116	124.08	0.426	6828.77	262629	4.794	0.209	0.756	3.04357
290	ARL13B_KAN566-11_6.tif:0023-0803	2.47	894.716	333	1588	8.169	129.496	0.337	2210.08	84998	5.817	0.172	0.667	0.985028
291	ARL13B_KAN566-11_6.tif:0024-0819	0.572	402.136	349	485	28.043	131.895	0.443	230.036	8847	3.078	0.325	0.657	0.102526
292	ARL13B_KAN566-11_6.tif:0025-0856	2.886	1198.79	351	2883	138.111	137.935	0.328	3459.92	133066	6.209	0.161	0.675	1.54208
293	ARL13B_KAN566-11_6.tif:0026-0859	2.678	795.165	196	1486	215.133	138.865	0.317	2129.58	81902	4.325	0.231	0.602	0.949149
294	ARL13B_KAN566-11_6.tif:0027-0863	2.132	666.134	242	1227	186.34	138.98	0.256	1420.28	54623	5.438	0.184	0.61	0.633017
295	ARL13B_KAN566-11_6.tif:0028-0967	0.624	413.042	210	653	20.089	156.07	0.34	257.754	9913	3.57	0.28	0.558	0.11488
296	ARL13B_KAN566-11_6.tif:0029-1029	3.354	1041.15	350	2408	200.938	165.908	0.268	3492.22	134308	7.524	0.133	0.761	1.55647
										83354.9				0.965987
297	ARL13B_KAN566-12_1.tif:0001-0007	0.884	513.794	134	1112	50.78	1.238	0.53	454.221	17469	3.063	0.327	0.673	0.202445
298	ARL13B_KAN566-12_1.tif:0002-0094	2.132	1134.91	170	2948	189.054	15.053	0.54	2419.78	93063	2.256	0.443	0.749	1.07849
299	ARL13B_KAN566-12_1.tif:0003-0160	2.158	546.831	338	1009	7.442	25.669	0.337	1180.13	45387	6.218	0.161	0.731	0.525983
300	ARL13B_KAN566-12_1.tif:0004-0199	1.742	556.657	354	879	124.467	32.177	0.544	969.754	37296	3.633	0.275	0.807	0.432217
301	ARL13B_KAN566-12_1.tif:0005-0197	1.118	508.721	213	768	172.648	31.761	0.457	568.784	21875	3.192	0.313	0.735	0.253506
302	ARL13B_KAN566-12_1.tif:0006-0263	2.574	543.889	326	834	162.599	42.45	0.41	1400.05	53845	5.118	0.195	0.78	0.624001
303	ARL13B_KAN566-12_1.tif:0007-0262	1.872	1181.78	253	3328	84.636	42.384	0.555	2212.42	85088	3.098	0.323	0.77	0.986071
304	ARL13B_KAN566-12_1.tif:0008-0429	2.522	641.124	341	1348	86.768	69.234	0.326	1617.01	62189	6.569	0.152	0.705	0.720698
305	ARL13B_KAN566-12_1.tif:0009-0528	2.262	724.092	278	2196	39.948	85.232	0.467	1637.99	62996	4.306	0.232	0.813	0.730051
306	ARL13B_KAN566-12_1.tif:0010-0581	2.184	831.607	357	1770	209.038	93.56	0.396	1816.34	69855	4.777	0.209	0.667	0.809538
307	ARL13B_KAN566-12_1.tif:0011-0585	1.768	505.897	210	784	57.988	94.379	0.311	894.48	34401	6.575	0.152	0.61	0.398668
308	ARL13B_KAN566-12_1.tif:0012-0622	1.924	1094.13	365	2267	59.889	100.339	0.594	2105.24	80966	3.278	0.305	0.855	0.938302
309	ARL13B_KAN566-12_1.tif:0013-0660	1.066	604.122	344	1114	18.664	106.47	0.499	644.033	24769	3.726	0.268	0.732	0.287044
310	ARL13B_KAN566-12_1.tif:0014-0706	1.69	589.631	290	1184	21.204	113.811	0.481	996.536	38326	3.7	0.27	0.751	0.444154
311	ARL13B_KAN566-12_1.tif:0015-0720	2.418	857.011	351	2297	38.755	116.273	0.485	2072.38	79702	3.992	0.25	0.791	0.923654
312	ARL13B_KAN566-12_1.tif:0016-0830	1.846	920.761	377	1656	77.247	133.811	0.41	1699.83	65374	3.59	0.279	0.676	0.757609
313	ARL13B_KAN566-12_1.tif:0017-0874	2.366	1077.15	124	3395	171.865	141.21	0.488	2548.7	98021	3.797	0.263	0.816	1.13595
314	ARL13B_KAN566-12_1.tif:0018-0982	1.3	510.06	350	834	7.476	158.222	0.315	663.118	25503	5.691	0.176	0.676	0.29555
315	ARL13B_KAN566-12_1.tif:0019-0985	2.262	999.678	214	2505	190.076	158.615	0.381	2261.41	86972	3.532	0.283	0.657	1.0079
316	ARL13B_KAN566-12_2.tif:0001-0075	1.066	828.317	346	1750	165.374	12.084	0.521	883.039	33961	3.431	0.291	0.713	0.393569
317	ARL13B_KAN566-12_2.tif:0002-0139	2.834	1248.82	258	3276	195.309	22.341	0.465	3539.36	136121	3.947	0.253	0.741	1.57748
318	ARL13B_KAN566-12_2.tif:0003-0152	1.352	1027.98	329	2683	31.772	24.575	0.592	1389.91	53455	1.749	0.572	0.748	0.619481
319	ARL13B_KAN566-12_2.tif:0004-0182	2.834	672.486	353	1322	201.39	29.365	0.503	1905.94	73301	4.278	0.234	0.82	0.849474
320	ARL13B_KAN566-12_2.tif:0005-0334	2.626	1356.3	324	2979	58.4	53.956	0.489	3561.85	136986	4.149	0.241	0.838	1.58751
321	ARL13B_KAN566-12_2.tif:0006-0352	2.21	594.941	211	2111	197.862	56.843	0.41	1314.9	50570	4.611	0.217	0.632	0.586048
322	ARL13B_KAN566-12_2.tif:0007-0394	1.638	807.873	168	2318	174.103	63.669	0.359	1323.38	50896	5.795	0.173	0.681	0.589826
323	ARL13B_KAN566-12_2.tif:0008-0399	1.95	937.04	336	1838	48.387	64.37	0.525	1827.34	70278	3.876	0.258	0.794	0.81444
324	ARL13B_KAN566-12_2.tif:0009-0450	0.91	656.771	352	1114	34.63	72.556	0.495	597.698	22987	3.887	0.257	0.753	0.266393
325	ARL13B_KAN566-12_2.tif:0010-0523	1.976	820.447	350	1927	67.388	84.472	0.528	1621.3	62354	3.592	0.278	0.796	0.72261
326	ARL13B_KAN566-12_2.tif:0011-0536	1.846	695.141	259	2059	31.17	86.49	0.355	1283.31	49355	5.843	0.171	0.776	0.571967
327	ARL13B_KAN566-12_2.tif:0012-0546	1.612	955.774	330	2349	169.617	88.217	0.404	1540.8	59258	4.635	0.216	0.667	0.686731
328	ARL13B_KAN566-12_2.tif:0013-0618	1.794	562.145	315	934	35.013	99.635	0.525	1008.55	38788	3.837	0.261	0.807	0.449508
329	ARL13B_KAN566-12_2.tif:0014-0718	1.69	957.938	358	1969	203.871	115.637	0.541	1619.01	62266	3.082	0.324	0.734	0.721591
330	ARL13B_KAN566-12_2.tif:0015-0770	2.626	985.822	353	2441	149.286	124.315	0.357	2588.92	99568	5.145	0.194	0.658	1.15388
331	ARL13B_KAN566-12_2.tif:0016-0935	1.404	682.759	352	1058	28.92	150.855	0.408	958.652	36869	5.809	0.172	0.735	0.427269
332	ARL13B_KAN566-12_2.tif:0017-0955	2.08	762.688	210	1879	157.41	153.667	0.38	1586.49	61015	4.165	0.24	0.744	0.707093
333	ARL13B_KAN566-12_2.tif:0018-0995	1.404	684.944	353	1171	125.868	160.378	0.375	961.72	36987	5.954	0.168	0.725	0.428636
334	ARL13B_KAN566-12_3.tif:0001-0024	2.938	659.575	216	2015	80.813	4.012	0.376	1937.95	74532	5.457	0.183	0.756	0.863739
335	ARL13B_KAN566-12_3.tif:0002-0077	1.196	637.217	352	1056	9.114	12.472	0.346	762.158	29312	6.107	0.164	0.648	0.339692
336	ARL13B_KAN566-12_3.tif:0003-0093	2.288	888.466	311	1801	182.033	15.141	0.346	2032.93	78185	3.46	0.289	0.585	0.906073
337	ARL13B_KAN566-12_3.tif:0004-0295	2.184	1041.07	327	2504	155.781	47.659	0.562	2273.84	87450	3.687	0.271	0.804	1.01344
338	ARL13B_KAN566-12_3.tif:0005-0327	2.028	1099.85	199	4002	119.441	52.803	0.479	2230.62	85788	3.342	0.299	0.726	0.994183
339	ARL13B_KAN566-12_3.tif:0006-0388	3.406	918.595	281	2004	180.947	62.142	0.268	3128.92	120336	4.367	0.229	0.533	1.39455
340	ARL13B_KAN566-12_3.tif:0007-0471	2.496	778.417	351	1699	221.091	75.68	0.495	1943.05	74728	3.56	0.281	0.75	0.866011
341	ARL13B_KAN566-12_3.tif:0008-0657	2.444	770.404	256	1957	166.379	105.67	0.237	1882.98	72418	5.726	0.175	0.531	0.839241
342	ARL13B_KAN566-12_3.tif:0009-0749	1.092	796.952	350	1398	14.747	120.799	0.455	870.324	33472	4.506	0.222	0.757	0.387902
343	ARL13B_KAN566-12_3.tif:0010-0771	2.678	1158.09	123	2851	149.918	124.243	0.425	3101.55	119283	3.298	0.303	0.687	1.38235
344	ARL13B_KAN566-12_3.tif:0011-0968	1.586	529.852	328	805	95.874	156.173	0.505	840.397	32321	3.881	0.258	0.808	0.374563
345	ARL13B_KAN566-12_3.tif:0012-1000	2.184	697.5	355	1270	139.813	161.271	0.386	1523.43	58590	5.09	0.196	0.721	0.67899
346	ARL13B_KAN566-12_4.tif:0001-0049	1.274	559	343	1159	150.139	8.11	0.474	712.209	27391	3.154	0.317	0.685	0.31743
347	ARL13B_KAN566-12_4.tif:0002-0068	2.21	1062.34	208	3647	121.098	11.006	0.515	2347.91	90299	4.244	0.236	0.89	1.04646
348	ARL13B_KAN566-12_4.tif:0003-0090	2.444	880.84	351	1861	83.534	14.495	0.442	2152.9	82799	4.219	0.237	0.755	0.959544
349	ARL13B_KAN566-12_4.tif:0004-0208	1.56	566	339	1026	203.43	33.51	0.38	883.013	33960	4.875	0.205	0.656	0.393557
350	ARL13B_KAN566-12_4.tif:0005-0220	0.754	779.586	189	2026	78.32	35.494	0.501	587.843	22608	2.921	0.342	0.611	0.262
351	ARL13B_KAN566-12_4.tif:0006-0240	2.34	1283.61	357	3183	149.853	38.881	0.469	3003.83	115525	4.284	0.233	0.763	1.3388
352	ARL13B_KAN566-12_4.tif:0007-0347	2.002	1545.62	273	4229	40.364	56.129	0.541	3094.52	119013	2.702	0.37	0.723	1.37922
353	ARL13B_KAN566-12_4.tif:0008-0443	2.08	842.675	223	1860	84.892	71.494	0.46	1752.87	67414	4.491	0.223	0.731	0.78125
354	ARL13B_KAN566-12_4.tif:0009-0493	2.73	1109.94	218	2937	101.565	79.331	0.317	3030.33	116544	5.223	0.191	0.677	1.35061
355	ARL13B_KAN566-12_4.tif:0010-0488	1.326	495.373	347	778	46.54	78.628	0.55	656.904	25264	3.426	0.292	0.779	0.29278
356	ARL13B_KAN566-12_4.tif:0011-0610	1.3	420.26	270	580	42.47	98.453	0.475	546.371	21013	2.795	0.358	0.725	0.243516
357	ARL13B_KAN566-12_4.tif:0012-0657	2.236	872.744	289	2275	95.291	106.074	0.326	1951.57	75056	5.444	0.184	0.606	0.869812
358	ARL13B_KAN566-12_4.tif:0013-0780	1.742	665.806	350	1031	5.621	125.788	0.26	1159.9	44609	9.157	0.109	0.65	0.516967
359	ARL13B_KAN566-12_4.tif:0014-0783	1.482	413.333	218	591	178.44	126.379	0.46	612.597	23560	3.387	0.295	0.722	0.273033
360	ARL13B_KAN566-12_4.tif:0015-0833	0.858	388.091	306	479	104.273	134.421	0.467	333.002	12807	3.486	0.287	0.635	0.148418
361	ARL13B_KAN566-12_4.tif:0016-0842	1.456	611.214	329	1273	223.593	135.865	0.437	889.982	34228	4.478	0.223	0.806	0.396663
362	ARL13B_KAN566-12_4.tif:0017-0867	1.612	925.355	284	2133	30.507	139.853	0.589	1491.76	57372	2.973	0.336	0.78	0.664875
363	ARL13B_KAN566-12_4.tif:0018-1006	1.144	650.682	323	1409	131.239	162.177	0.461	744.425	28630	3.387	0.295	0.652	0.331788
364	ARL13B_KAN566-12_5.tif:0001-0006	1.43	1335.35	340	3265	107.957	0.799	0.49	1909.66	73444	3.557	0.281	0.815	0.851131
365	ARL13B_KAN566-12_5.tif:0002-0038	2.678	1333.24	353	3712	203.348	6.272	0.367	3570.64	137324	5.959	0.168	0.696	1.59143
366	ARL13B_KAN566-12_5.tif:0003-0081	3.172	1203.03	313	2502	177.349	13.085	0.345	3816.22	146769	5.912	0.169	0.744	1.70088
367	ARL13B_KAN566-12_5.tif:0004-0153	1.69	652.615	285	1450	9.676	24.732	0.288	1102.99	42420	7.774	0.129	0.594	0.491599
368	ARL13B_KAN566-12_5.tif:0005-0161	0.884	1051.41	125	2390	173.576	26.094	0.518	929.504	35748	2.605	0.384	0.773	0.414278
369	ARL13B_KAN566-12_5.tif:0006-0269	1.222	1399.51	211	2899	181.748	43.447	0.555	1710.31	65777	2.223	0.45	0.707	0.762279
370	ARL13B_KAN566-12_5.tif:0007-0286	2.366	758.648	87	1690	201.757	46.359	0.404	1795.07	69037	4.368	0.229	0.705	0.800059
371	ARL13B_KAN566-12_5.tif:0008-0319	2.366	1115.09	230	2823	141.495	51.592	0.457	2638.46	101473	4.295	0.233	0.762	1.17595
372	ARL13B_KAN566-12_5.tif:0009-0399	2.782	891.626	224	1796	47.847	64.68	0.341	2480.65	95404	2.169	0.461	0.523	1.10562
373	ARL13B_KAN566-12_5.tif:0010-0481	0.546	739.81	243	1808	113.355	77.842	0.55	403.96	15536	2.329	0.429	0.75	0.180044
374	ARL13B_KAN566-12_5.tif:0011-0507	2.028	1023.78	358	2823	46.118	81.812	0.345	2076.36	79855	7.324	0.137	0.881	0.925427
375	ARL13B_KAN566-12_5.tif:0012-0541	0.572	547.364	97	1188	97.424	87.207	0.498	313.111	12042	3.011	0.332	0.667	0.139553
376	ARL13B_KAN566-12_5.tif:0013-0547	1.326	701	182	1863	32.479	88.335	0.441	929.582	35751	4.989	0.2	0.779	0.414313
377	ARL13B_KAN566-12_5.tif:0014-0631	0.832	810.75	416	1384	104.299	101.769	0.567	674.585	25944	3.482	0.287	0.736	0.300661
378	ARL13B_KAN566-12_5.tif:0015-0633	2.028	558.397	314	952	158.656	102.142	0.494	1132.5	43555	3.704	0.27	0.772	0.504752
379	ARL13B_KAN566-12_5.tif:0016-0715	1.404	488.148	321	774	64.763	115.279	0.416	685.401	26360	3.753	0.266	0.783	0.305482
380	ARL13B_KAN566-12_5.tif:0017-0819	2.834	862.394	159	1715	196.819	132.226	0.574	2444.17	94001	2.944	0.34	0.79	1.08936
381	ARL13B_KAN566-12_5.tif:0018-0823	1.976	768.316	42	2002	146.822	132.84	0.532	1518.28	58392	3.331	0.3	0.792	0.676696
382	ARL13B_KAN566-12_5.tif:0019-0835	0.91	562.514	359	878	29.465	134.812	0.495	511.919	19688	3.27	0.306	0.686	0.228161
383	ARL13B_KAN566-12_5.tif:0020-0866	2.314	866.865	352	1951	76.54	139.779	0.325	2006.05	77151	5.642	0.177	0.593	0.894091
384	ARL13B_KAN566-12_5.tif:0021-0977	1.196	709.283	356	1440	33.018	157.629	0.425	848.353	32627	4.914	0.204	0.687	0.378109
385	ARL13B_KAN566-12_6.tif:0001-0024	2.236	531.919	131	1310	140.282	3.773	0.383	1189.44	45745	4.098	0.244	0.656	0.530131
386	ARL13B_KAN566-12_6.tif:0002-0058	2.47	556.789	288	964	131.445	9.611	0.53	1375.35	52895	3.088	0.324	0.788	0.612992
387	ARL13B_KAN566-12_6.tif:0003-0119	1.846	609.099	338	1186	203.971	19.274	0.294	1124.46	43246	4.406	0.227	0.538	0.501171
388	ARL13B_KAN566-12_6.tif:0004-0140	2.73	975.571	123	2457	114.975	22.735	0.41	2663.47	102435	5.549	0.18	0.827	1.1871
389	ARL13B_KAN566-12_6.tif:0005-0142	2.626	970.139	350	2294	122.73	22.957	0.477	2547.74	97984	4.547	0.22	0.774	1.13552
390	ARL13B_KAN566-12_6.tif:0006-0169	3.068	1635.3	367	3672	136.893	27.143	0.369	5017.39	192965	5.612	0.178	0.766	2.23624
391	ARL13B_KAN566-12_6.tif:0007-0211	2.444	1252.73	354	3536	79.658	33.931	0.521	3061.87	117757	4.076	0.245	0.752	1.36467
392	ARL13B_KAN566-12_6.tif:0008-0265	1.69	588.2	354	965	205.473	42.861	0.452	994.118	38233	4.366	0.229	0.747	0.443076
393	ARL13B_KAN566-12_6.tif:0009-0279	0.936	469.222	331	677	171.001	45.141	0.521	439.218	16892	3.225	0.31	0.735	0.195759
394	ARL13B_KAN566-12_6.tif:0010-0290	2.288	670.625	357	1575	36.105	46.72	0.316	1534.48	59015	6.195	0.161	0.657	0.683915
395	ARL13B_KAN566-12_6.tif:0011-0304	3.354	1441.5	291	3309	162.627	48.964	0.314	4835.07	185953	6.228	0.161	0.737	2.15498
396	ARL13B_KAN566-12_6.tif:0012-0394	1.664	620.703	198	1529	148.788	63.356	0.29	1032.91	39725	3.997	0.25	0.547	0.460367
397	ARL13B_KAN566-12_6.tif:0013-0403	0.884	582.647	360	1046	61.469	64.927	0.521	515.091	19810	4.023	0.249	0.723	0.229575
398	ARL13B_KAN566-12_6.tif:0014-0454	1.664	691.562	358	1501	17.725	73.364	0.517	1150.83	44260	3.657	0.273	0.753	0.512922
399	ARL13B_KAN566-12_6.tif:0015-0559	1.716	648.788	350	1209	8.39	90.283	0.58	1113.39	42820	3.298	0.303	0.825	0.496234
400	ARL13B_KAN566-12_6.tif:0016-0618	2.912	1053.12	357	2711	125.892	99.622	0.387	3066.86	117949	5.801	0.172	0.727	1.36689
401	ARL13B_KAN566-12_6.tif:0017-0629	1.742	814.91	197	1837	76.653	101.257	0.446	1419.66	54599	2.997	0.334	0.67	0.632739
402	ARL13B_KAN566-12_6.tif:0018-0705	1.04	639.275	149	1393	86.495	113.677	0.308	664.886	25571	6.51	0.154	0.684	0.296338
403	ARL13B_KAN566-12_6.tif:0019-0742	1.924	986.081	358	2134	201.756	119.743	0.474	1897.33	72970	4.183	0.239	0.763	0.845638
404	ARL13B_KAN566-12_6.tif:0020-0747	1.482	966.544	179	2580	50.747	120.684	0.578	1432.5	55093	2.463	0.406	0.75	0.638464
405	ARL13B_KAN566-12_6.tif:0021-0748	0.572	560.136	260	1072	114.136	120.52	0.595	320.417	12323	2.967	0.337	0.733	0.142809
406	ARL13B_KAN566-12_6.tif:0022-0755	2.548	1072.08	280	2639	160.771	121.759	0.339	2731.83	105064	6.487	0.154	0.729	1.21757
										62856.6				0.728435
407	ARL13B_KAN566-13_1.tif:0001-0015	0.884	493.618	363	693	2.115	2.642	0.235	436.384	16783	7.842	0.128	0.642	0.194495
408	ARL13B_KAN566-13_1.tif:0002-0096	0.728	919.036	371	1440	1.025	15.612	0.564	669.098	25733	2.021	0.495	0.691	0.298216
409	ARL13B_KAN566-13_1.tif:0003-0144	4.316	1084.16	196	2953	149.277	23.608	0.354	4679.5	179970	4.73	0.211	0.683	2.08564
410	ARL13B_KAN566-13_1.tif:0004-0217	2.834	792.174	357	1779	14.771	35.171	0.21	2245.16	86347	10.597	0.094	0.63	1.00066
411	ARL13B_KAN566-13_1.tif:0005-0222	3.276	1508.77	159	3572	57.689	35.617	0.406	4943.03	190105	4.536	0.22	0.71	2.2031
412	ARL13B_KAN566-13_1.tif:0006-0271	3.094	1154.17	259	2701	88.748	43.716	0.433	3571.21	137346	4.856	0.206	0.807	1.59168
413	ARL13B_KAN566-13_1.tif:0007-0311	2.366	647.538	290	1321	192.579	50.167	0.51	1532.17	58926	2.806	0.356	0.731	0.682884
414	ARL13B_KAN566-13_1.tif:0008-0332	2.184	581.024	149	1227	15.591	53.564	0.214	1269.03	48806	8.879	0.113	0.606	0.565605
415	ARL13B_KAN566-13_1.tif:0009-0541	2.6	629.34	182	1763	194.437	87.362	0.187	1636.38	62934	9.719	0.103	0.583	0.729332
416	ARL13B_KAN566-13_1.tif:0010-0531	3.302	1080.63	181	4183	165.472	85.756	0.358	3568.45	137240	5.332	0.188	0.685	1.59045
417	ARL13B_KAN566-13_1.tif:0011-0730	1.3	561.8	357	1096	13.277	117.79	0.542	730.384	28090	3.044	0.328	0.741	0.32553
418	ARL13B_KAN566-13_1.tif:0012-0821	1.222	875.617	208	2285	84.541	132.254	0.413	1070.07	41154	2.847	0.351	0.614	0.476927
419	ARL13B_KAN566-13_1.tif:0013-0843	3.458	927.383	200	2204	51.689	135.631	0.342	3207.09	123342	2.507	0.399	0.561	1.42939
420	ARL13B_KAN566-13_1.tif:0014-0885	2.184	1307.13	353	3509	100.497	142.714	0.553	2854.95	109799	2.682	0.373	0.743	1.27244
421	ARL13B_KAN566-13_1.tif:0015-0899	0.78	743.233	203	1387	206.298	144.975	0.418	579.757	22297	3.898	0.257	0.625	0.258396
422	ARL13B_KAN566-13_1.tif:0016-1028	1.768	894.309	359	2078	143.854	165.964	0.295	1581.23	60813	7.138	0.14	0.72	0.704752
423	ARL13B_KAN566-13_2.tif:0001-0008	3.146	640.339	354	1240	198.638	1.308	0.48	2014.63	77481	4.322	0.231	0.846	0.897915
424	ARL13B_KAN566-13_2.tif:0002-0054	2.86	1183.85	72	3480	40.181	8.81	0.576	3386	130223	3.38	0.296	0.876	1.50913
425	ARL13B_KAN566-13_2.tif:0003-0134	3.302	874.811	298	1891	101.278	21.556	0.453	2888.8	111101	3.582	0.279	0.718	1.28753
426	ARL13B_KAN566-13_2.tif:0004-0181	2.86	996.873	334	2340	180.254	29.147	0.35	2851.23	109656	5.408	0.185	0.657	1.27079
427	ARL13B_KAN566-13_2.tif:0005-0217	2.574	1010.99	329	3174	68.355	34.829	0.312	2602.45	100088	7.137	0.14	0.695	1.1599
428	ARL13B_KAN566-13_2.tif:0006-0236	2.054	612.139	295	1220	15.818	38.113	0.232	1257.41	48359	6.385	0.157	0.534	0.560425
429	ARL13B_KAN566-13_2.tif:0007-0333	3.666	1352.77	244	4537	130.263	53.588	0.463	4959.54	190740	3.866	0.259	0.76	2.21046
430	ARL13B_KAN566-13_2.tif:0008-0334	1.638	598.143	300	939	40.339	53.964	0.472	979.817	37683	3.127	0.32	0.787	0.436702
431	ARL13B_KAN566-13_2.tif:0009-0349	3.25	679.352	167	1460	64.243	56.299	0.294	2208.03	84919	6.824	0.147	0.638	0.984113
432	ARL13B_KAN566-13_2.tif:0010-0349	0.832	465.875	166	743	201.522	56.251	0.479	387.631	14908	1.997	0.501	0.634	0.172766
433	ARL13B_KAN566-13_2.tif:0011-0367	0.884	525.029	95	1141	203.156	59.331	0.259	464.154	17851	6.369	0.157	0.54	0.206872
434	ARL13B_KAN566-13_2.tif:0012-0461	4.498	693.012	198	1455	72.325	74.237	0.274	3117.35	119891	6.512	0.154	0.7	1.3894
435	ARL13B_KAN566-13_2.tif:0013-0547	2.912	1269.7	327	3602	45.683	88.398	0.378	3697.61	142207	4.911	0.204	0.673	1.64801
436	ARL13B_KAN566-13_2.tif:0014-0612	0.988	653.026	335	1151	223.391	99.008	0.27	645.229	24815	3.338	0.3	0.49	0.287577
437	ARL13B_KAN566-13_2.tif:0015-0617	2.678	773.66	188	1917	104.018	99.876	0.276	2071.99	79687	6.638	0.151	0.617	0.92348
438	ARL13B_KAN566-13_2.tif:0016-0640	1.014	416.026	212	605	221.353	103.181	0.359	421.875	16225	4.822	0.207	0.69	0.188029
439	ARL13B_KAN566-13_2.tif:0017-0673	3.614	669.748	278	1285	74.289	108.381	0.376	2420.62	93095	4.654	0.215	0.702	1.07886
440	ARL13B_KAN566-13_2.tif:0018-0714	3.588	749.819	136	2773	141.198	115.46	0.463	2690.51	103475	3.852	0.26	0.857	1.19916
441	ARL13B_KAN566-13_2.tif:0019-0764	2.002	1196.07	192	4867	46.954	123.196	0.512	2394.67	92097	3.761	0.266	0.77	1.0673
442	ARL13B_KAN566-13_2.tif:0020-0798	2.106	641.284	205	1563	25.829	128.854	0.364	1350.62	51944	5.609	0.178	0.764	0.601971
443	ARL13B_KAN566-13_2.tif:0021-0812	2.236	611.419	359	955	121.641	131.049	0.45	1367.21	52582	4.741	0.211	0.785	0.609364
444	ARL13B_KAN566-13_2.tif:0022-0837	1.144	496.159	350	705	183.73	135.043	0.401	567.64	21831	5.64	0.177	0.759	0.252996
445	ARL13B_KAN566-13_2.tif:0023-0901	0.858	604.758	359	1065	31.808	145.328	0.478	518.913	19957	4.011	0.249	0.717	0.231278
446	ARL13B_KAN566-13_2.tif:0024-0930	1.794	394.493	189	589	70.615	150.085	0.247	707.763	27220	7.626	0.131	0.627	0.315448
447	ARL13B_KAN566-13_2.tif:0025-0966	3.12	828.792	117	2169	179.26	155.684	0.462	2585.99	99455	2.408	0.415	0.667	1.15257
448	ARL13B_KAN566-13_2.tif:0026-0990	1.3	459.34	282	666	42.783	159.828	0.468	597.178	22967	2.543	0.393	0.633	0.266161
449	ARL13B_KAN566-13_3.tif:0001-0090	3.146	761.62	291	1472	59.814	14.625	0.527	2396.2	92156	2.554	0.392	0.729	1.06798
450	ARL13B_KAN566-13_3.tif:0002-0103	2.47	1446.06	353	5011	29.735	16.591	0.538	3571.99	137376	3.581	0.279	0.772	1.59203
451	ARL13B_KAN566-13_3.tif:0003-0141	2.626	770.96	243	2051	118.077	22.6	0.239	2024.66	77867	8.408	0.119	0.623	0.902388
452	ARL13B_KAN566-13_3.tif:0004-0237	1.82	521.771	87	1481	121.216	38.196	0.533	949.681	36524	2.782	0.359	0.761	0.423271
453	ARL13B_KAN566-13_3.tif:0005-0318	0.936	429.889	305	581	41.432	51.246	0.501	402.4	15476	3.967	0.252	0.699	0.179349
454	ARL13B_KAN566-13_3.tif:0006-0396	2.652	461.304	243	845	43.726	63.827	0.279	1223.45	47053	7.581	0.132	0.699	0.54529
455	ARL13B_KAN566-13_3.tif:0007-0459	3.718	920.86	317	2035	103.839	74.256	0.483	3423.96	131683	3.676	0.272	0.757	1.52605
456	ARL13B_KAN566-13_3.tif:0008-0550	2.106	838.037	295	2192	83.453	88.718	0.485	1765.01	67881	4.172	0.24	0.786	0.786662
457	ARL13B_KAN566-13_3.tif:0009-0577	3.146	1006.91	351	2426	66.955	92.993	0.312	3167.93	121836	5.259	0.19	0.608	1.41194
458	ARL13B_KAN566-13_3.tif:0010-0617	2.938	605.761	223	1198	153.278	99.349	0.503	1779.83	68451	2.828	0.354	0.727	0.793268
459	ARL13B_KAN566-13_3.tif:0011-0630	4.16	727.506	351	1851	77.557	101.654	0.353	3026.61	116401	6.2	0.161	0.773	1.34895
460	ARL13B_KAN566-13_3.tif:0012-0673	3.64	740.171	16	1537	28.969	108.962	0.378	2694.39	103624	2.551	0.392	0.642	1.20088
461	ARL13B_KAN566-13_3.tif:0013-0704	2.522	1307.13	360	5356	175.715	113.572	0.366	3296.79	126792	5.798	0.172	0.716	1.46937
462	ARL13B_KAN566-13_3.tif:0014-0741	2.47	657.6	283	1299	189.083	119.438	0.33	1624.37	62472	6.309	0.158	0.633	0.723978
463	ARL13B_KAN566-13_3.tif:0015-0747	3.77	863.379	16	2318	135.702	120.599	0.511	3255.14	125190	2.872	0.348	0.777	1.45081
464	ARL13B_KAN566-13_3.tif:0016-0787	2.73	942.057	219	2041	15.722	126.961	0.278	2571.97	98916	6.306	0.159	0.671	1.14632
465	ARL13B_KAN566-13_3.tif:0017-0832	2.548	569.643	239	1320	55.151	133.8	0.228	1451.54	55825	8.682	0.115	0.645	0.646947
466	ARL13B_KAN566-13_3.tif:0018-0848	1.352	498.865	65	1007	35.559	136.768	0.255	674.507	25941	7.2	0.139	0.619	0.300626
467	ARL13B_KAN566-13_3.tif:0019-0854	2.912	921.929	190	2468	114.495	137.693	0.323	2684.82	103256	6.571	0.152	0.681	1.19662
468	ARL13B_KAN566-13_3.tif:0020-0861	3.77	1048.44	352	3254	128.321	138.787	0.335	3952.86	152024	6.258	0.16	0.713	1.76178
469	ARL13B_KAN566-13_3.tif:0021-0907	5.668	616.711	181	1158	96.975	146.703	0.335	3495.73	134443	1.939	0.516	0.539	1.55804
470	ARL13B_KAN566-13_3.tif:0022-0999	2.106	849.753	369	1700	114.99	161.136	0.28	1789.69	68830	7.189	0.139	0.581	0.79766
471	ARL13B_KAN566-13_3.tif:0023-1009	2.366	540.516	242	1329	84.616	162.828	0.267	1278.94	49187	5.186	0.193	0.628	0.57002
472	ARL13B_KAN566-13_4.tif:0001-0199	1.846	869.437	351	2046	114.927	32.022	0.416	1605.08	61730	4.668	0.214	0.683	0.715379
473	ARL13B_KAN566-13_4.tif:0002-0218	2.6	916.25	180	1975	179.379	35.173	0.441	2382.39	91625	4.421	0.226	0.678	1.06183
474	ARL13B_KAN566-13_4.tif:0003-0225	1.586	644.328	184	1507	69.566	36.261	0.514	1021.97	39304	2.792	0.358	0.678	0.455488
475	ARL13B_KAN566-13_4.tif:0004-0227	1.404	424.037	304	608	222.101	36.598	0.461	595.384	22898	3.774	0.265	0.745	0.265361
476	ARL13B_KAN566-13_4.tif:0005-0240	2.496	691.26	359	1562	33.063	38.71	0.273	1725.49	66361	8.224	0.122	0.708	0.769047
477	ARL13B_KAN566-13_4.tif:0006-0229	1.04	484.55	322	751	12.723	36.963	0.339	503.962	19382	7.117	0.141	0.86	0.224615
478	ARL13B_KAN566-13_4.tif:0007-0258	3.718	577.455	246	1031	97.619	41.842	0.5	2147.11	82576	3.017	0.331	0.728	0.95696
479	ARL13B_KAN566-13_4.tif:0008-0322	2.886	1240.54	353	2500	212.809	51.679	0.431	3580.42	137700	2.436	0.411	0.649	1.59578
480	ARL13B_KAN566-13_4.tif:0009-0466	2.028	536.103	265	852	171.574	75.093	0.519	1087.28	41816	2.899	0.345	0.792	0.484599
481	ARL13B_KAN566-13_4.tif:0010-0705	2.86	861.4	48	2323	106.67	113.857	0.386	2463.75	94754	4.661	0.215	0.663	1.09809
482	ARL13B_KAN566-13_4.tif:0011-0783	2.08	992.438	336	2422	11.09	126.043	0.385	2064.39	79395	3.795	0.264	0.637	0.920096
483	ARL13B_KAN566-13_4.tif:0012-0836	2.522	510.402	308	808	73.892	134.58	0.536	1287.31	49509	2.306	0.434	0.735	0.573752
484	ARL13B_KAN566-13_4.tif:0013-0889	2.184	934.107	366	2044	40.103	143.34	0.294	2040.21	78465	6.33	0.158	0.709	0.909318
485	ARL13B_KAN566-13_4.tif:0014-0912	3.38	669.123	329	1158	31.946	147.089	0.394	2261.77	86986	5.448	0.184	0.87	1.00807
486	ARL13B_KAN566-13_4.tif:0015-0953	3.25	1205.07	365	4099	105.628	153.542	0.242	3916.72	150634	7.144	0.14	0.554	1.74567
487	ARL13B_KAN566-13_4.tif:0016-0955	2.366	749.319	287	1410	53.892	153.954	0.333	1772.99	68188	5.918	0.169	0.722	0.79022
488	ARL13B_KAN566-13_4.tif:0017-1012	2.132	557.768	165	1341	138.901	163.551	0.359	1189.23	45737	3.695	0.271	0.643	0.530039
489	ARL13B_KAN566-13_4.tif:0018-1025	2.184	597.155	298	1562	129.14	165.276	0.374	1304.27	50161	5.102	0.196	0.669	0.581308
490	ARL13B_KAN566-13_5.tif:0001-0009	1.118	868.279	351	2595	193.056	1.476	0.508	970.794	37336	3.652	0.274	0.694	0.432681
491	ARL13B_KAN566-13_5.tif:0002-0008	1.82	673.757	350	1244	203.99	1.156	0.461	1226.31	47163	3.548	0.282	0.745	0.546564
492	ARL13B_KAN566-13_5.tif:0003-0022	2.73	543.724	339	888	48.93	3.749	0.248	1484.45	57091	5.57	0.18	0.565	0.661618
493	ARL13B_KAN566-13_5.tif:0004-0071	2.756	716.802	351	1372	152.351	11.473	0.318	1975.62	75981	6.991	0.143	0.752	0.880532
494	ARL13B_KAN566-13_5.tif:0005-0073	2.522	1130.76	247	3697	40.621	11.89	0.456	2851.96	109684	3.997	0.25	0.729	1.27111
495	ARL13B_KAN566-13_5.tif:0006-0137	3.848	1440.48	329	5084	86.725	22.165	0.31	5543.3	213191	5.102	0.196	0.609	2.47064
496	ARL13B_KAN566-13_5.tif:0007-0219	1.716	406.455	88	1122	213.8	35.045	0.539	697.518	26826	2.011	0.497	0.729	0.310882
497	ARL13B_KAN566-13_5.tif:0008-0233	0.52	389.2	306	544	212.237	37.749	0.476	202.396	7784	3.524	0.284	0.678	0.0902075
498	ARL13B_KAN566-13_5.tif:0009-0236	1.82	423.586	241	652	200.719	38.149	0.428	770.972	29651	4.061	0.246	0.657	0.343621
499	ARL13B_KAN566-13_5.tif:0010-0296	2.938	640.168	357	1256	114.009	47.522	0.332	1880.93	72339	5.896	0.17	0.751	0.838325
500	ARL13B_KAN566-13_5.tif:0011-0322	3.666	731.681	110	1471	179.566	52.007	0.277	2682.5	103167	4.37	0.229	0.61	1.19559
501	ARL13B_KAN566-13_5.tif:0012-0331	0.546	434.286	354	618	89.275	53.47	0.538	237.134	9120	3.061	0.327	0.724	0.10569
502	ARL13B_KAN566-13_5.tif:0013-0351	2.782	791.299	352	1464	214.004	56.596	0.274	2201.53	84669	7.751	0.129	0.697	0.981215
503	ARL13B_KAN566-13_5.tif:0014-0386	3.224	613.516	350	1213	119.372	62.172	0.374	1978.1	76076	6.41	0.156	0.743	0.881633
504	ARL13B_KAN566-13_5.tif:0015-0429	2.236	753.767	350	1536	186.983	69.36	0.504	1685.53	64824	3.432	0.291	0.768	0.751235
505	ARL13B_KAN566-13_5.tif:0016-0518	3.198	843.236	271	1890	20.694	83.633	0.197	2696.83	103718	11.19	0.089	0.67	1.20197
506	ARL13B_KAN566-13_5.tif:0017-0575	2.418	1296.01	354	2803	204.249	92.681	0.501	3133.94	120529	3.896	0.257	0.785	1.39679
507	ARL13B_KAN566-13_5.tif:0018-0681	3.64	663.721	353	1440	141.55	109.571	0.373	2416.09	92921	4.69	0.213	0.765	1.07685
508	ARL13B_KAN566-13_5.tif:0019-0703	1.586	594.721	351	967	179.787	113.373	0.382	943.285	36278	5.584	0.179	0.652	0.42042
509	ARL13B_KAN566-13_5.tif:0020-0733	0.65	483.04	356	684	0.751	117.993	0.404	313.995	12076	4.314	0.232	0.769	0.139947
510	ARL13B_KAN566-13_5.tif:0021-0890	3.9	848.18	357	2008	84.814	143.581	0.381	3308.1	127227	5.521	0.181	0.721	1.47441
511	ARL13B_KAN566-13_5.tif:0022-0899	2.496	540.979	350	984	220.351	145.004	0.322	1350.37	51934	5.782	0.173	0.619	0.601855
512	ARL13B_KAN566-13_5.tif:0023-0923	0.65	497	344	805	2.196	148.818	0.424	323.069	12425	4.558	0.219	0.641	0.143991
513	ARL13B_KAN566-13_5.tif:0024-0999	1.456	494.214	303	921	72.868	161.296	0.403	719.619	27676	3.603	0.278	0.663	0.320733
514	ARL13B_KAN566-13_6.tif:0001-0008	0.832	442.156	354	571	204.006	1.214	0.163	367.896	14149	10.982	0.091	0.516	0.16397
515	ARL13B_KAN566-13_6.tif:0002-0026	0.728	430.107	354	509	27.793	4.285	0.515	313.137	12043	2.499	0.4	0.737	0.139564
516	ARL13B_KAN566-13_6.tif:0003-0101	3.952	564.454	327	1171	85.226	15.904	0.369	2230.86	85797	5.101	0.196	0.774	0.994288
517	ARL13B_KAN566-13_6.tif:0004-0183	1.664	604.531	351	1238	66.327	29.446	0.508	1006	38690	2.971	0.337	0.805	0.448372
518	ARL13B_KAN566-13_6.tif:0005-0215	2.028	768.987	360	1565	21.781	34.605	0.381	1559.6	59981	5.996	0.167	0.821	0.69511
519	ARL13B_KAN566-13_6.tif:0006-0332	4.42	1060.2	0	3210	192.974	53.269	0.452	4686.37	180234	2.005	0.499	0.672	2.0887
520	ARL13B_KAN566-13_6.tif:0007-0337	2.574	1164.59	336	2598	23.367	54.451	0.324	2997.82	115294	5.79	0.173	0.645	1.33612
521	ARL13B_KAN566-13_6.tif:0008-0354	1.638	566.73	95	1259	36.83	57.022	0.396	928.36	35704	6.082	0.164	0.783	0.413768
522	ARL13B_KAN566-13_6.tif:0009-0397	3.25	1211.67	73	2789	100.463	64.265	0.388	3938.17	151459	4.318	0.232	0.67	1.75523
523	ARL13B_KAN566-13_6.tif:0010-0460	2.808	1040.21	108	2943	174.405	74.309	0.501	2921.09	112343	3.231	0.309	0.735	1.30192
524	ARL13B_KAN566-13_6.tif:0011-0521	4.81	1405.81	362	3702	143.147	84.258	0.35	6762.33	260074	5.961	0.168	0.771	3.01396
525	ARL13B_KAN566-13_6.tif:0012-0591	1.222	490.383	273	811	179.871	95.379	0.413	599.284	23048	4.068	0.246	0.603	0.2671
526	ARL13B_KAN566-13_6.tif:0013-0662	1.898	508.26	317	821	13.431	106.742	0.562	964.736	37103	3.532	0.283	0.839	0.429981
527	ARL13B_KAN566-13_6.tif:0014-0683	2.418	611.473	355	1149	65.146	110.103	0.489	1478.63	56867	3.759	0.266	0.778	0.659023
528	ARL13B_KAN566-13_6.tif:0015-0709	1.768	449.353	313	691	27.081	114.293	0.323	794.504	30556	5.776	0.173	0.627	0.354109
529	ARL13B_KAN566-13_6.tif:0016-0743	2.158	515.193	193	885	127.567	119.773	0.461	1111.85	42761	4.862	0.206	0.865	0.49555
530	ARL13B_KAN566-13_6.tif:0017-0786	2.834	850.339	344	1629	87.358	126.833	0.522	2410.01	92687	3.54	0.282	0.826	1.07413
531	ARL13B_KAN566-13_6.tif:0018-0872	1.014	462	315	761	34.902	140.302	0.375	468.496	18018	4.055	0.247	0.696	0.208808
532	ARL13B_KAN566-13_6.tif:0019-0884	3.328	821.828	362	1422	119.601	142.55	0.536	2735.21	105194	3.517	0.284	0.8	1.21908
533	ARL13B_KAN566-13_6.tif:0020-0906	0.546	476.381	168	898	5.049	146.357	0.325	260.12	10004	5.301	0.189	0.7	0.115935
534	ARL13B_KAN566-13_6.tif:0021-0993	0.572	426.182	328	571	182.594	159.96	0.316	243.791	9376	3.826	0.261	0.537	0.108657
535	ARL13B_KAN566-13_6.tif:0022-1000	1.17	582.511	359	823	222.473	161.306	0.244	681.579	26213	9.342	0.107	0.581	0.303778
										74603.5				0.864568

## Sheet: IF condition
Exp. number	Cell line	Culture condition	Fixation condition	rabbit-Alexa488	mouse IgG1-Alexa568	mouse IgG2b-Alexa647	Nuclear stain	Date	Replicate
Exp.1
KAN546-1	RPE-BFP-Cas9 pMCB306 (pool)		serum starved for 24 hours, Fixed in 4% PFA at RT for 15 minutes.	ARL13B, Proteintech, 17711-1-AP, 1:1000	CEP170, Invitrogen, 41-3200, 1:1000	Ac-Tub, 6B-11, Santa Cruz, 1:1000	DAPI	2020-10-16	No.1
KAN546-2	RPE-BFP-Cas9 CEP164KO (pool)		serum starved for 24 hours, Fixed in 4% PFA at RT for 15 minutes.	ARL13B, Proteintech, 17711-1-AP, 1:1000	CEP170, Invitrogen, 41-3200, 1:1000	Ac-Tub, 6B-11, Santa Cruz, 1:1000	DAPI	2020-10-16	No.1
KAN546-3	RPE-BFP-Cas9 CEP83 KO (pool)		serum starved for 24 hours, Fixed in 4% PFA at RT for 15 minutes.	ARL13B, Proteintech, 17711-1-AP, 1:1000	CEP170, Invitrogen, 41-3200, 1:1000	Ac-Tub, 6B-11, Santa Cruz, 1:1000	DAPI	2020-10-16	No.1
KAN546-4	RPE-BFP-Cas9 SCLT1 KO (pool)		serum starved for 24 hours, Fixed in 4% PFA at RT for 15 minutes.	ARL13B, Proteintech, 17711-1-AP, 1:1000	CEP170, Invitrogen, 41-3200, 1:1000	Ac-Tub, 6B-11, Santa Cruz, 1:1000	DAPI	2020-10-16	No.1
KAN546-5	RPE-BFP-Cas9 FBF1 KO (pool)		serum starved for 24 hours, Fixed in 4% PFA at RT for 15 minutes.	ARL13B, Proteintech, 17711-1-AP, 1:1000	CEP170, Invitrogen, 41-3200, 1:1000	Ac-Tub, 6B-11, Santa Cruz, 1:1000	DAPI	2020-10-16	No.1
KAN546-6	RPE-BFP-Cas9 CEP89KO (pool)		serum starved for 24 hours, Fixed in 4% PFA at RT for 15 minutes.	ARL13B, Proteintech, 17711-1-AP, 1:1000	CEP170, Invitrogen, 41-3200, 1:1000	Ac-Tub, 6B-11, Santa Cruz, 1:1000	DAPI	2020-10-16	No.1
KAN546-7	RPE-BFP-Cas9 CCDC92 KO (pool)		serum starved for 24 hours, Fixed in 4% PFA at RT for 15 minutes.	ARL13B, Proteintech, 17711-1-AP, 1:1000	CEP170, Invitrogen, 41-3200, 1:1000	Ac-Tub, 6B-11, Santa Cruz, 1:1000	DAPI	2020-10-16	No.1
KAN546-8	RPE-BFP-Cas9 ANKRD26 KO (pool)		serum starved for 24 hours, Fixed in 4% PFA at RT for 15 minutes.	ARL13B, Proteintech, 17711-1-AP, 1:1000	CEP170, Invitrogen, 41-3200, 1:1000	Ac-Tub, 6B-11, Santa Cruz, 1:1000	DAPI	2020-10-16	No.1
KAN546-9	RPE-BFP-Cas9 TTBK2 KO (pool)		serum starved for 24 hours, Fixed in 4% PFA at RT for 15 minutes.	ARL13B, Proteintech, 17711-1-AP, 1:1000	CEP170, Invitrogen, 41-3200, 1:1000	Ac-Tub, 6B-11, Santa Cruz, 1:1000	DAPI	2020-10-16	No.1
KAN546-10	RPE-BFP-Cas9 INPP5E KO (pool)		serum starved for 24 hours, Fixed in 4% PFA at RT for 15 minutes.	ARL13B, Proteintech, 17711-1-AP, 1:1000	CEP170, Invitrogen, 41-3200, 1:1000	Ac-Tub, 6B-11, Santa Cruz, 1:1000	DAPI	2020-10-16	No.1
KAN546-11	RPE-BFP-Cas9 Kiz KO (pool)		serum starved for 24 hours, Fixed in 4% PFA at RT for 15 minutes.	ARL13B, Proteintech, 17711-1-AP, 1:1000	CEP170, Invitrogen, 41-3200, 1:1000	Ac-Tub, 6B-11, Santa Cruz, 1:1000	DAPI	2020-10-16	No.1
KAN546-12	RPE-BFP-Cas9 sgPDE6D#1		serum starved for 24 hours, Fixed in 4% PFA at RT for 15 minutes.	ARL13B, Proteintech, 17711-1-AP, 1:1000	CEP170, Invitrogen, 41-3200, 1:1000	Ac-Tub, 6B-11, Santa Cruz, 1:1000	DAPI	2020-10-16	No.1
KAN546-13	RPE-BFP-Cas9 sgLRRC45#1		serum starved for 24 hours, Fixed in 4% PFA at RT for 15 minutes.	ARL13B, Proteintech, 17711-1-AP, 1:1000	CEP170, Invitrogen, 41-3200, 1:1000	Ac-Tub, 6B-11, Santa Cruz, 1:1000	DAPI	2020-10-16	No.1
Exp.2
KAN565-1	RPE-BFP-Cas9 pMCB306 (pool)		serum starved for 24 hours, Fixed in 4% PFA at RT for 15 minutes.	ARL13B, Proteintech, 17711-1-AP, 1:1000	CEP170, Invitrogen, 41-3200, 1:1000	Ac-Tub, 6B-11, Santa Cruz, 1:1000	DAPI	2020-10-23	No.2
KAN565-2	RPE-BFP-Cas9 CEP164KO (pool)		serum starved for 24 hours, Fixed in 4% PFA at RT for 15 minutes.	ARL13B, Proteintech, 17711-1-AP, 1:1000	CEP170, Invitrogen, 41-3200, 1:1000	Ac-Tub, 6B-11, Santa Cruz, 1:1000	DAPI	2020-10-23	No.2
KAN565-3	RPE-BFP-Cas9 CEP83 KO (pool)		serum starved for 24 hours, Fixed in 4% PFA at RT for 15 minutes.	ARL13B, Proteintech, 17711-1-AP, 1:1000	CEP170, Invitrogen, 41-3200, 1:1000	Ac-Tub, 6B-11, Santa Cruz, 1:1000	DAPI	2020-10-23	No.2
KAN565-4	RPE-BFP-Cas9 SCLT1 KO (pool)		serum starved for 24 hours, Fixed in 4% PFA at RT for 15 minutes.	ARL13B, Proteintech, 17711-1-AP, 1:1000	CEP170, Invitrogen, 41-3200, 1:1000	Ac-Tub, 6B-11, Santa Cruz, 1:1000	DAPI	2020-10-23	No.2
KAN565-5	RPE-BFP-Cas9 FBF1 KO (pool)		serum starved for 24 hours, Fixed in 4% PFA at RT for 15 minutes.	ARL13B, Proteintech, 17711-1-AP, 1:1000	CEP170, Invitrogen, 41-3200, 1:1000	Ac-Tub, 6B-11, Santa Cruz, 1:1000	DAPI	2020-10-23	No.2
KAN565-6	RPE-BFP-Cas9 CEP89KO (pool)		serum starved for 24 hours, Fixed in 4% PFA at RT for 15 minutes.	ARL13B, Proteintech, 17711-1-AP, 1:1000	CEP170, Invitrogen, 41-3200, 1:1000	Ac-Tub, 6B-11, Santa Cruz, 1:1000	DAPI	2020-10-23	No.2
KAN565-7	RPE-BFP-Cas9 CCDC92 KO (pool)		serum starved for 24 hours, Fixed in 4% PFA at RT for 15 minutes.	ARL13B, Proteintech, 17711-1-AP, 1:1000	CEP170, Invitrogen, 41-3200, 1:1000	Ac-Tub, 6B-11, Santa Cruz, 1:1000	DAPI	2020-10-23	No.2
KAN565-8	RPE-BFP-Cas9 ANKRD26 KO (pool)		serum starved for 24 hours, Fixed in 4% PFA at RT for 15 minutes.	ARL13B, Proteintech, 17711-1-AP, 1:1000	CEP170, Invitrogen, 41-3200, 1:1000	Ac-Tub, 6B-11, Santa Cruz, 1:1000	DAPI	2020-10-23	No.2
KAN565-9	RPE-BFP-Cas9 TTBK2 KO (pool)		serum starved for 24 hours, Fixed in 4% PFA at RT for 15 minutes.	ARL13B, Proteintech, 17711-1-AP, 1:1000	CEP170, Invitrogen, 41-3200, 1:1000	Ac-Tub, 6B-11, Santa Cruz, 1:1000	DAPI	2020-10-23	No.2
KAN565-10	RPE-BFP-Cas9 INPP5E KO (pool)		serum starved for 24 hours, Fixed in 4% PFA at RT for 15 minutes.	ARL13B, Proteintech, 17711-1-AP, 1:1000	CEP170, Invitrogen, 41-3200, 1:1000	Ac-Tub, 6B-11, Santa Cruz, 1:1000	DAPI	2020-10-23	No.2
KAN565-11	RPE-BFP-Cas9 Kiz KO (pool)		serum starved for 24 hours, Fixed in 4% PFA at RT for 15 minutes.	ARL13B, Proteintech, 17711-1-AP, 1:1000	CEP170, Invitrogen, 41-3200, 1:1000	Ac-Tub, 6B-11, Santa Cruz, 1:1000	DAPI	2020-10-23	No.2
KAN565-12	RPE-BFP-Cas9 sgPDE6D#1		serum starved for 24 hours, Fixed in 4% PFA at RT for 15 minutes.	ARL13B, Proteintech, 17711-1-AP, 1:1000	CEP170, Invitrogen, 41-3200, 1:1000	Ac-Tub, 6B-11, Santa Cruz, 1:1000	DAPI	2020-10-23	No.2
KAN565-13	RPE-BFP-Cas9 sgLRRC45#1		serum starved for 24 hours, Fixed in 4% PFA at RT for 15 minutes.	ARL13B, Proteintech, 17711-1-AP, 1:1000	CEP170, Invitrogen, 41-3200, 1:1000	Ac-Tub, 6B-11, Santa Cruz, 1:1000	DAPI	2020-10-23	No.2
Exp.3
KAN566-1	RPE-BFP-Cas9 pMCB306 (pool)		serum starved for 24 hours, Fixed in 4% PFA at RT for 15 minutes.	ARL13B, Proteintech, 17711-1-AP, 1:1000	CEP170, Invitrogen, 41-3200, 1:1000	Ac-Tub, 6B-11, Santa Cruz, 1:1000	DAPI	2020-10-23	No.3
KAN566-2	RPE-BFP-Cas9 CEP164KO (pool)		serum starved for 24 hours, Fixed in 4% PFA at RT for 15 minutes.	ARL13B, Proteintech, 17711-1-AP, 1:1000	CEP170, Invitrogen, 41-3200, 1:1000	Ac-Tub, 6B-11, Santa Cruz, 1:1000	DAPI	2020-10-23	No.3
KAN566-3	RPE-BFP-Cas9 CEP83 KO (pool)		serum starved for 24 hours, Fixed in 4% PFA at RT for 15 minutes.	ARL13B, Proteintech, 17711-1-AP, 1:1000	CEP170, Invitrogen, 41-3200, 1:1000	Ac-Tub, 6B-11, Santa Cruz, 1:1000	DAPI	2020-10-23	No.3
KAN566-4	RPE-BFP-Cas9 SCLT1 KO (pool)		serum starved for 24 hours, Fixed in 4% PFA at RT for 15 minutes.	ARL13B, Proteintech, 17711-1-AP, 1:1000	CEP170, Invitrogen, 41-3200, 1:1000	Ac-Tub, 6B-11, Santa Cruz, 1:1000	DAPI	2020-10-23	No.3
KAN566-5	RPE-BFP-Cas9 FBF1 KO (pool)		serum starved for 24 hours, Fixed in 4% PFA at RT for 15 minutes.	ARL13B, Proteintech, 17711-1-AP, 1:1000	CEP170, Invitrogen, 41-3200, 1:1000	Ac-Tub, 6B-11, Santa Cruz, 1:1000	DAPI	2020-10-23	No.3
KAN566-6	RPE-BFP-Cas9 CEP89KO (pool)		serum starved for 24 hours, Fixed in 4% PFA at RT for 15 minutes.	ARL13B, Proteintech, 17711-1-AP, 1:1000	CEP170, Invitrogen, 41-3200, 1:1000	Ac-Tub, 6B-11, Santa Cruz, 1:1000	DAPI	2020-10-23	No.3
KAN566-7	RPE-BFP-Cas9 CCDC92 KO (pool)		serum starved for 24 hours, Fixed in 4% PFA at RT for 15 minutes.	ARL13B, Proteintech, 17711-1-AP, 1:1000	CEP170, Invitrogen, 41-3200, 1:1000	Ac-Tub, 6B-11, Santa Cruz, 1:1000	DAPI	2020-10-23	No.3
KAN566-8	RPE-BFP-Cas9 ANKRD26 KO (pool)		serum starved for 24 hours, Fixed in 4% PFA at RT for 15 minutes.	ARL13B, Proteintech, 17711-1-AP, 1:1000	CEP170, Invitrogen, 41-3200, 1:1000	Ac-Tub, 6B-11, Santa Cruz, 1:1000	DAPI	2020-10-23	No.3
KAN566-9	RPE-BFP-Cas9 TTBK2 KO (pool)		serum starved for 24 hours, Fixed in 4% PFA at RT for 15 minutes.	ARL13B, Proteintech, 17711-1-AP, 1:1000	CEP170, Invitrogen, 41-3200, 1:1000	Ac-Tub, 6B-11, Santa Cruz, 1:1000	DAPI	2020-10-23	No.3
KAN566-10	RPE-BFP-Cas9 INPP5E KO (pool)		serum starved for 24 hours, Fixed in 4% PFA at RT for 15 minutes.	ARL13B, Proteintech, 17711-1-AP, 1:1000	CEP170, Invitrogen, 41-3200, 1:1000	Ac-Tub, 6B-11, Santa Cruz, 1:1000	DAPI	2020-10-23	No.3
KAN566-11	RPE-BFP-Cas9 Kiz KO (pool)		serum starved for 24 hours, Fixed in 4% PFA at RT for 15 minutes.	ARL13B, Proteintech, 17711-1-AP, 1:1000	CEP170, Invitrogen, 41-3200, 1:1000	Ac-Tub, 6B-11, Santa Cruz, 1:1000	DAPI	2020-10-23	No.3
KAN566-12	RPE-BFP-Cas9 sgPDE6D#1		serum starved for 24 hours, Fixed in 4% PFA at RT for 15 minutes.	ARL13B, Proteintech, 17711-1-AP, 1:1000	CEP170, Invitrogen, 41-3200, 1:1000	Ac-Tub, 6B-11, Santa Cruz, 1:1000	DAPI	2020-10-23	No.3
KAN566-13	RPE-BFP-Cas9 sgLRRC45#1		serum starved for 24 hours, Fixed in 4% PFA at RT for 15 minutes.	ARL13B, Proteintech, 17711-1-AP, 1:1000	CEP170, Invitrogen, 41-3200, 1:1000	Ac-Tub, 6B-11, Santa Cruz, 1:1000	DAPI	2020-10-23	No.3

## Sheet: Total analysis
pMCB306			FBF1 KO			CEP89 KO			ANKRD26 KO			INPP5E KO			KIZ KO			sgLRRC45
KAN546	KAN565	KAN566	KAN546	KAN565	KAN566	KAN546	KAN565	KAN566	KAN546	KAN565	KAN566	KAN546	KAN565	KAN566	KAN546	KAN565	KAN566	KAN546	KAN565	KAN566
0.853456	1.09049	0.798459	0.721578	1.10376	1.08908	0.614932	0.431017	0.252973	0.318796	0.145177	0.40503	0.514728	0.646263	2.16551	0.414588	0.989896	1.52609	2.30003	1.35546	0.202445
1.50254	1.87773	1.12098	2.30852	1.1951	0.596362	0.435949	0.601816	1.42797	0.526085	0.98314	1.18432	2.29989	0.361304	0.24369	0.610365	0.685266	2.09457	2.20519	0.571496	1.07849
1.05609	0.714474	0.717453	0.268808	1.04242	1.27588	0.585874	1.42919	1.25798	0.255794	1.14445	0.832241	0.960506	0.675878	0.549948	0.303979	1.01539	0.428439	1.99728	0.6703	0.525983
0.613165	1.24732	1.34695	1.14359	0.519861	1.13434	0.971936	0.101178	0.761804	0.16768	0.245409	0.202909	0.727042	1.60359	0.797335	0.492498	1.55147	0.831372	0.555719	0.639291	0.432217
0.748768	0.196015	1.01091	1.46707	0.282013	0.191077	0.791334	0.811386	0.50058	0.238964	0.239981	0.730074	0.335471	0.478211	1.98739	0.220889	1.09618	0.630305	1.93054	0.15771	0.253506
0.692905	1.35792	1.0926	0.160597	0.46044	0.137305	1.5587	0.626268	0.514266	0.816904	0.524243	0.174771	0.491107	0.61288	1.77404	1.05506	1.20572	3.50915	1.53769	0.830684	0.624001
0.444085	0.765727	1.37244	1.35021	1.43759	0.751119	0.592528	0.0678202	2.13312	1.10858	0.147601	0.598367	0.820501	1.23411	0.511172	0.651072	1.75604	1.14392	0.797282	1.32996	0.986071
0.559947	0.406282	0.637212	0.205304	0.541483	0.139286	0.322997	0.15957	0.442589	0.344979	0.535548	0.368815	1.58485	0.446621	0.766671	0.876217	0.857958	1.19067	0.458389	2.00776	0.720698
0.623983	0.874749	0.615379	0.649434	0.861211	0.501658	1.18076	1.08797	0.171758	0.177015	0.673695	0.592375	1.36721	0.94076	0.611763	1.97788	1.37569	1.35672	2.22117	1.51717	0.730051
1.39017	0.454373	0.294669	0.372627	1.26893	1.00946	0.353262	0.324675	0.934547	0.250166	0.14858	0.528752	0.405729	0.334503	1.30209	2.09822	2.18428	0.54748	1.67502	0.27617	0.809538
1.24639	0.72826	0.711787	0.664773	0.48466	0.214822	0.428353	0.934609	0.259578	0.372957	0.485366	0.0923978	0.573108	0.50849	0.410442	2.13823	0.739847	0.746901	0.64721	0.679016	0.398668
1.6029	0.509062	0.129192	0.615655	1.69632	0.971249	0.566097	0.249194	1.17645	0.200947	0.18061	0.558408	0.672945	0.255311	0.337826	0.351953	2.58649	0.929413	3.13765	0.471189	0.938302
0.798536	0.94369	0.473381	1.37247	0.585863	0.175049	0.233748	0.143816	0.400754	0.260077	0.466848	0.389304	0.541305	0.123464	0.510929	0.168733	0.836826	0.594959	0.435052	0.508025	0.287044
0.756529	0.548173	2.03827	0.286883	0.320791	0.574691	0.691075	0.0817478	0.299096	0.895546	0.617022	0.211392	0.256206	0.370841	0.520814	0.366038	1.22051	0.438568	0.522379	1.06877	0.444154
0.676286	0.708049	1.05855	0.243375	0.305062	0.317928	0.264489	0.977106	0.642277	1.01455	0.212865	0.449612	0.441394	1.11367	1.10088	0.551848	0.318899	2.28876	1.31676	0.411835	0.923654
0.632247	1.33493	0.662117	0.567919	1.32747	0.182675	0.146741	0.153726	1.14308	0.414762	0.167438	0.214382	0.563727	0.894993	0.911868	1.28911	0.585839	0.654132	2.06745	0.334237	0.757609
0.347322	1.06611	1.06018	0.261935	1.58585	0.834234	0.23815	0.403659	1.49014	0.230233	0.316143	0.313745	0.48104	0.926475	0.660274	0.465976	0.609967	0.700221	0.846364	0.443741	1.13595
1.52988	0.67636	2.27715	1.01844	0.574202	1.07845	0.869719	0.274518	1.39074	0.297271	0.201103	0.129204	1.60819	0.865287	1.17203	1.06123	1.9028	1.72037	1.34975	1.19752	0.29555
1.6953	0.784344	1.50802	0.548315	1.00752	1.05672	1.4394	0.779107	0.949891	0.176576	0.262499	0.91801	1.93277	1.221	0.16229	2.00708	0.222825	0.273265	1.12044	0.81024	1.0079
2.1766	0.695134	0.164689	0.17664	0.241699	0.625681	0.338445	0.384079	0.959544	0.432672	0.115704	0.164573	0.505439	1.55868	0.179639	0.83216	0.357336	0.531209	1.30377	1.76407	0.393569
0.985326	1.34454	1.59655	0.710678	1.70161	0.750748	0.332835	1.33918	0.201043	0.424838	0.118658	0.307197	0.885781	1.33369	0.275339	2.36407	2.00014	0.906525	0.221457	1.53001	1.57748
1.74498	0.720632	0.342334	0.709086	0.346588	1.10439	0.14362	1.06994	0.661306	0.303238	0.21616	0.283683	1.07908	0.703368	2.04719	1.62838	0.236512	0.352034	1.12642	0.425356	0.619481
0.387279	0.851218	0.524685	0.395003	0.679489	1.24215	0.16423	0.654431	0.913931	0.388734	0.260416	0.13107	0.826275	0.850098	1.41969	1.96744	1.35406	2.3328	0.465317	0.78573	0.849473
0.206914	0.752131	0.493244	0.273567	0.706223	0.803246	0.244968	0.491873	0.803593		0.582162	0.477043	1.68739	0.539665	0.698367	0.330007	2.01405	0.947608	0.231524	1.29941	1.58751
2.49769	1.90933	1.79144	0.71864	0.920906	0.596617	0.183751	0.723039	0.244559		1.50331	0.17644	0.829945	0.723961	0.72137	0.942303	0.127631	0.900337	2.15946	1.0567	0.586048
0.613632	0.927712	0.859046	0.304061	0.33261	0.349855	0.183065	2.02509	0.746182		0.328859	0.35959	0.806883	0.179175	1.12163	1.09944	0.719678	0.921927	1.18091	0.476734	0.589826
2.77903	0.578559	0.422749	0.192665	0.912398	0.158292	1.09125	0.320467	0.866428		0.741789	0.196975	0.261487	0.6538	0.318484	0.265203	0.808074	0.26871	0.557696	0.673745	0.81444
1.5385	0.0764606	0.158535	0.228403	1.13236	0.385804	0.338463	0.370716	0.175837		0.389308	0.112539	1.06703	0.647201	0.756983	0.496031	0.520085	0.725102	2.47485	0.762133	0.266393
0.405317	0.586295	0.615669	0.393484	1.12838	0.502504	0.305983	0.288014	0.213188		0.0907783	0.11634	0.447608	0.573637	0.898911	0.769012	0.58974	1.14053	1.29092	0.813204	0.72261
0.714321	0.755227	1.99678	0.710019	1.13819	0.615194	0.802151	1.49605	0.227547		0.0745848	0.397219	0.130807	1.09627	0.863948	0.742252	0.850828	0.264504	0.813024	1.15839	0.571967
0.432508	1.17749	1.64069	0.870397	0.568898	0.260448	0.474139	0.355718	0.308773		0.280677	0.530734	0.485616	0.670508	0.376684	1.59435	0.826733	0.35215	1.53424	0.518209	0.686731
2.83665	1.1168	1.2701	0.538614	0.0887531	0.802446	0.36267	1.12208	0.704509		0.253419	0.298308	0.715932	0.593948	1.74651	0.842968	0.430079	2.3285	0.839436	1.0297	0.449508
1.90214	0.412499	0.153494	0.396916	1.04035	1.34024	1.61398	1.68715	0.493777		0.62743	0.835219	0.427282	0.620633	0.257516	1.11264	0.421015	0.633353	1.57122	0.535141	0.721591
0.804833	0.53183	0.898413	0.384753	2.0115	1.07204	0.51136	1.10981	1.61479		0.309951	0.446031	0.529554	0.150821	0.953437	1.17887	0.932626	0.508681	1.13796	0.488487	1.15388
0.367484	0.497583	1.69578	0.982241	1.35353	1.07159	0.688412	0.443508	1.45814		0.755841	0.512134	0.856211	0.377248	0.256496	2.35494	0.925886	0.372129	0.622482	0.175464	0.427269
1.04485	0.238728	1.42478	0.757206	0.436802	1.66931	0.464548	0.274194	1.21552		0.220069	1.141	0.318631	0.677289	0.566509	1.20639	0.71664	1.54064	0.697838	0.249269	0.707093
1.57375	0.698845	0.891645	0.840214	0.416176	1.39282	0.574453	0.249095	0.56535		0.517969	0.181574	0.194093	0.150066	0.609828	2.11685	0.108673	0.650667	0.216588	0.260881	0.428636
0.402499	1.3073	0.993928	1.1152	0.562499	0.166288	1.54809	1.22774	1.15654		0.232644	0.296176	0.36558	0.0852007	0.549496	0.224934	2.00278	1.38856	1.58276	0.554746	0.863739
0.994313	0.5143	0.260992	0.478734	1.24952	0.200464	0.960048	0.341201	0.201321		0.175581	0.440086	1.17931	0.53041	1.24415	0.167991	0.252149	0.169313	1.39208	1.11311	0.339692
2.65066	1.97937	1.21533	0.481745	0.419073	1.35345	1.19197	1.00806	1.15155		0.423439	1.09875	1.47376	0.231947	0.942068	1.71645	0.070136	1.3983	0.398957	0.957186	0.906073
0.523825	2.27914	0.229981	1.77324	0.611851	0.578179	0.520521	0.906206	0.592595			0.227535	1.55362	0.850421	2.85556	1.72625	0.590603	0.775073	1.29768	1.2172	1.01344
0.583568	0.240363	0.226597	0.192079	0.116658	0.419145	1.7077	1.0408	1.60381			0.47177	0.895491	0.149668	0.465628	0.501668	0.781638	1.15876	0.638827	0.379174	0.994183
0.834192	0.977454	1.37111	0.277246	1.38984	1.00012	0.44155	1.45907	0.462325			0.442195	0.368939	0.743823	1.53529	1.23749	0.2019	0.346553	0.640401	1.13381	1.39455
0.541433	1.47647	1.06016	1.28712	1.26744	0.191123	0.504798	0.580834	1.07121			0.493905	0.523285	0.624218	0.866138	0.7303	0.737996	0.417731	0.733293	0.573065	0.866011
0.238653	0.985381	1.10158	0.46949	1.01581	0.369696	0.147674	1.04107	0.693024			0.500823	0.936638	1.54785	0.37498	1.61942	1.29812	0.58672	1.4953	1.77528	0.839241
2.00589	0.208532	0.847109	0.339571	1.22436	1.96639	1.10781	0.625397	1.00089			1.02122	1.42825	0.28613	0.498876	0.693738	0.549642	1.98941	0.792944	0.567006	0.387902
2.12235	1.80333	0.8997	0.385055	0.242479	0.574702	0.834677	0.649783	0.838974			0.366115	0.686371	0.252797	0.209816	1.02627	1.86513	0.857215	1.38197	1.2067	1.38235
1.33291	1.52611	1.01952	0.637811	0.0663179	0.744131	1.55129	0.324642	1.54086			0.644942	0.161228	0.42763	0.855001	2.81551	1.46846	0.559069	0.934643	0.0926542	0.374563
0.395607	0.457378	0.237571	1.3877	0.530361	0.59088	0.765242	0.967511	0.920432				0.227835	0.217081	0.222494	0.482596	1.16243	0.841547	1.12191	0.607444	0.67899
1.28305	0.135001	1.33684	0.582946	0.496554	0.31065	0.313451	0.61215	0.426956				1.28283	0.215023	0.903675	0.163132	1.27574	0.719968	0.538404	0.100846	0.31743
0.168788	1.13731	1.00085	0.829195	0.615868	0.537571	0.279736	0.100622	0.894531				0.773176	0.620317	0.518635	1.62847	1.38296	1.05366	0.876364	0.875504	1.04646
0.934661	0.602364	0.693059	0.54826	2.84764	0.99569	0.627479	0.45937	0.546449				0.369836	0.939332	0.611914	1.08925	0.96932	1.65396	0.936162	0.449924	0.959544
1.86168	0.58422	0.717222	0.374467	0.73534	0.519991	0.423667	0.603725	0.663241				0.774211	0.805235	0.336656	0.222473	1.16106	0.510106	1.80719	0.72958	0.393557
0.660188	0.81942	0.999352	0.801273	1.3799	0.257087	1.24652	0.906455	0.300545				1.33783	1.06368	1.12241	1.29011	0.88163	2.46201	1.04824	1.38376	0.262
0.781111	0.0988875	0.729042	0.505558	0.572575	0.367621	0.23815	0.954646	1.0336				1.04908	0.559037	0.455743	2.4294	0.148788	3.05395	1.94145	1.61867	1.3388
0.655191	0.718383	0.859625	0.924521	0.516076	0.747503	0.282719	0.94325	0.692422				0.968074	0.136055	0.219272	0.276249	0.34438	0.158315	0.395287	1.78473	1.37922
0.198806	0.998288	0.507626		0.334453	0.156403	0.654321	0.405195	1.38518				1.41302	0.0851592	0.724511	1.01995	0.877363	0.290277	0.687414	0.0651808	0.78125
1.14377	0.164691	1.04164		0.634801	0.582733	0.483548	0.545981	0.809063				0.208809	0.769022	2.14243	1.58319	0.724907	0.192398	0.490256	1.37099	1.35061
0.969475	2.22109	0.735011		0.355602	1.00855	0.55981	0.293882	1.30875				1.79567	0.492296	0.908959	2.5902	0.823761	0.894427	0.791938	1.69739	0.29278
0.716655	1.23795	1.22842		0.169281	0.442578	0.762487	0.133507	0.258327				1.35586	0.187192	0.765002	1.89	1.01792	1.51959	0.427831	1.14775	0.243516
0.361416	0.85741	1.84568		0.291832	0.162279	1.94647	0.338495	0.534871				1.243	0.256	0.360112	1.18465	1.24956	1.51322	0.981637	1.44365	0.869812
0.202659	2.33673	0.918265		1.44047	0.510512	0.151015	0.239724	0.243203				0.503572	0.466109	0.980578	0.260178	1.55454	1.42881	1.39129	1.05896	0.516967
1.17837	1.37523	1.88906		0.838062	1.37483	0.525033	0.370891	0.46805				0.662421	0.672757	1.88365	0.167982	1.79399	1.22895	1.3303	0.885398	0.273033
0.612863	0.939905	1.78298		0.522218	1.26456	0.36947	0.265587	1.20189				0.340156	0.520625	0.363866	1.21518	1.41226	0.559729	0.535979	0.722168	0.148418
0.393832	2.1196	0.805158		0.112375	1.41829	0.754983	0.48232	1.17162				0.225227	0.126668	0.325588	1.07449	2.37841	0.533005	1.7167	2.0681	0.396663
2.34561	1.94026	0.250852		0.81898	0.586453	0.968587	1.62008	0.625032				0.181335	0.609278	0.309712	0.755879	1.9905	0.5334	1.5593	0.915768	0.664875
1.16775	0.439856	1.37643		0.733655	0.155951	0.644108	1.85038	0.826551				0.227122	0.480842	0.187079	3.27797	2.61835	1.4099	1.26427	1.33472	0.331788
0.839802	1.37832	1.24719		0.493325	1.42623	1.30175	1.8953	1.34572				0.476089	0.438536	0.185468	1.05554	1.29239	2.0746	2.14092	1.2357	0.851131
0.705059	1.17119	1.55083		0.396928	0.972443	0.827117	0.656979	0.413745				0.551134	0.750579	0.554584	1.37517	0.639117	0.536714	1.05211	1.53289	1.59143
0.513117	2.56576	1.96329		0.433648	1.04818	0.817554	0.584677	1.10399				0.349903	0.368475	0.393916	0.214712	1.06792	0.823874	0.922928	1.09229	1.70088
0.843591	0.87611	0.186546			0.73814		0.743624	0.117615				0.679525	0.154573	0.789258	0.237838	0.549185	0.592352	0.328305	1.02591	0.491599
0.643293	0.761079	0.28621			0.200499		0.388893	0.605273				1.44495	0.901816	1.16003	2.92051	1.10524	0.938858	0.331508	0.738859	0.414278
0.595466	0.565088	1.05596			0.197578		0.795192	1.19642				0.576302	0.442745	0.943111	2.71527	0.972449	1.10395	0.709324	3.11528	0.762279
1.06973	3.00896	1.09452			0.874494		0.425422	0.603999				0.517528	0.541084	1.26141	1.5887	1.01064	0.116862	1.26441	0.53876	0.800059
0.30613	0.765843	0.634014			2.16601		1.1228	1.00476				0.274364	0.431407	1.01478	1.03022	1.14079	0.590984	0.819787	0.934692	1.17595
0.121528	0.557643	1.57378			0.740063		0.299742					0.720196	0.762988	0.801496	0.627003	0.975056	0.666845	0.275041	1.04849	1.10562
0.288888	2.08665	1.59482			0.401576		0.394596					0.36515	1.42984	0.408008	1.30508	0.776683	0.790486	0.932593	0.589565	0.180044
2.31586	0.545674	0.171329			0.209654		0.697442					1.14889	0.471538	0.249983	2.23058	1.84692	0.498181	0.848807	0.851849	0.925427
1.11765	1.8967	0.386662			0.620536		0.0997756					0.22034	0.205511	0.911509	1.65454	0.371306	1.30869	0.569181	0.752272	0.139553
1.93748	0.630543	1.15035			2.36739		0.815337					0.321285	0.44179	0.676916	2.93932	0.376717	0.951258	0.263491	1.6544	0.414313
1.57701	0.252954	1.48364			1.88338		0.54311					0.516229	0.499036	2.17964	0.926763	1.40482	1.4673	0.810086	1.49284	0.300661
1.19374	0.844951	1.04279			0.675838		1.15044					0.305947	1.14995	1.09314	1.41255	1.75986	0.420292	1.56256	0.90228	0.504752
0.282609	1.37978	3.21284			0.361572		1.01098					0.413993	0.137043	0.815599	0.29641	1.61986	1.04008	1.69314	0.52226	0.305482
0.738088	1.45233	0.52494			0.700105		0.175863					0.266484	0.437989	0.433886	0.790071	2.66206	0.398053	0.202741	0.314558	1.08936
0.670621	1.33602	2.72886			0.273636		0.263562					0.83432	0.75336	1.33282	1.10272	0.788453	1.05436	1.83606	0.86322	0.676696
0.448789	0.1395	1.76958					0.295252					2.06264	0.393135	0.701414	1.03073	0.383233	1.07685	0.54751	0.178403	0.228161
1.37333	1.54689	0.106467					0.748745					1.37149	0.851143	0.581146	0.340852	1.23118	0.677947	1.65106	1.29175	0.894091
1.04835	0.715943	0.30328										0.381321	0.681589	0.816364	1.0029	0.792794	0.334095	0.46712	2.08234	0.378109
0.981134	0.115206	0.739032										0.995567	0.133532	1.30621	0.281804	0.791905	1.0637	0.747945	1.13444	0.530131
1.76928	1.705	0.877739										1.16892	0.326883	0.497891	0.30559	0.332859	0.220118	1.40687	0.76698	0.612992
3.14677	0.295891	1.07006										0.316856	0.479929	0.979674	0.261633	1.97485	0.372975	0.57265	1.14081	0.501171
1.70509	2.09837	0.205331										0.966756	0.409469	1.26816	1.34422	2.3539	0.331279	0.669651	0.30146	1.1871
0.977528	0.506174	1.72234										0.729101	0.893997	0.375849	1.43496	1.47155	0.252671	1.0383	1.65278	1.13552
0.606173	1.12398	0.625728										0.345281	0.969461	0.146147	1.30214	1.12649	1.27515	0.250285	0.585581	2.23624
0.30116	0.230204	0.907557										0.499216	0.523704	0.0889791	0.965173	0.159628	1.82269	0.557797	0.977347	1.36467
0.21203	2.24769	1.26435										0.51773	1.49818	0.756856	1.89617	0.601733	1.12536	0.759979	0.254523	0.443076
0.340303	0.233665	1.47183										0.475466	0.297933	0.452938	1.73499	2.15123	1.20673	0.731554	2.85275	0.195759
1.46134	0.401717	2.30263										0.18614	1.32994	1.85707	1.22009	2.00543	1.76265	0.437138	1.14082	0.683915
0.984969	1.05274	0.373091										0.269971	0.374377	0.717071	0.862993	0.379382	0.947492	0.972678	0.721861	2.15498
1.72733	1.17135	0.27987										0.859524	0.229581	1.64604	1.07782	1.96409	0.920165	0.526763	0.133474	0.460367
1.36565	0.632361	0.931696										1.13648	0.199136	0.912042	0.885607	0.501501	1.02619	0.150036	0.871802	0.229575
1.38408	2.25973	1.73906										0.220807		1.01365	1.4985	1.57974	1.55204	0.450326	3.65345	0.512922
1.2238	1.19365	0.614174										0.226682		0.895087	0.817709	1.00068	0.320107	0.989471	0.642603	0.496234
0.466992	0.925106	0.685967										0.755925		0.510767	1.10392	0.580585	0.545962	0.800723	2.41383	1.36689
0.30839	1.11717	1.32704										0.414167		0.475965	1.87836	0.874309	0.896466	0.347725	1.13942	0.632739
0.767649	0.479564	1.05734										0.980914		1.75808	0.629501	0.556381	1.43918	0.596481	0.0565653	0.296338
0.901943	0.548413	0.913085										0.34681		0.251142	0.441788	0.160773	1.89838	1.01868	1.29082	0.845638
0.656893	0.861004	1.11868										0.905338		1.35129	0.395662	1.13809	1.08525	1.38552	1.92672	0.638464
0.884454	0.463013	1.45472										1.08039		0.981494	0.186725	0.801285	1.09374	0.969813	0.518218	0.142809
1.22537	0.665486	0.511798										0.753125		0.534431	0.155133	1.03752	0.337618	0.572998	1.16099	1.21757
0.773359	0.551426	0.549381										0.50521		0.27746	1.15583	2.33698	0.269614	0.686252	0.905119
1.0176	0.97777	0.652637										1.22177		1.14972	0.419796	0.662664	0.418264	1.50968	2.79471
0.253479	0.88456	0.781169										0.464832		1.06155	0.510774	0.894536	0.491019	0.651265	1.15718
0.587568	0.975413	2.17558										1.309		0.0890371	0.542586	1.02373	2.28713		0.61591
2.14883	1.98816	0.491807										0.222729		0.240445	4.8255	0.1062	2.71966		0.442255
0.919661	1.82348	0.952985										0.551729		0.643354	0.649773	0.478302	0.56156		0.601567
1.47698	1.14449	0.369568										0.317972		0.46061	0.335809	0.420799	1.95564		2.47102
1.43409	1.48127	0.985017										0.2225		0.349311	1.19979		0.959486		0.833124
0.181976	0.73959	0.807754												0.601171	0.599666		0.502886		0.816117
1.89965	0.628028	1.47103												0.609805	0.28379		0.32042		0.932177
0.570408	0.940038	1.95777												1.07667	0.719034		0.496686		0.572907
1.04525	0.485988	1.23443												0.681679	1.17453		0.163924		0.531091
0.19498	1.39766	1.49185												0.170715	0.49561		0.780868		0.947201
1.23982	2.49083	0.340306												0.392653	0.830504		1.35846
1.35024	0.915934	1.56503												0.8636	0.850025		1.31444
0.694287	0.53622	1.0994												0.328509	0.440818		0.165489
1.38481	1.26504	1.58203												0.478434	0.790629		0.608391
0.71303	1.33194	0.952661												0.856068	0.606146		1.72742
0.681731		0.482049												1.58549	0.158593		0.311427
0.92766		1.60767												1.26488	0.911278		0.42392
0.170398		0.777982												1.07848	0.257094		0.685967
1.03846		0.903617												0.119736	0.192381		1.07081
1.07171		1.27974												1.07422			1.07463
1.15144		0.668896												0.678631			1.13011
		0.187009												0.313177			3.04357
		0.324603												0.313571			0.985028
														0.601171			0.102526
														0.609805			1.54208
														1.07667			0.949149
														0.681679			0.633017
														0.170715			0.11488
														0.392653			1.55647
														0.8636
														0.328509
														0.478434
														0.856068
														1.58549
														1.26488
														1.07848
														0.119736
														1.07422
														0.678631
														0.313177
														0.313571

## Sheet: Statistics"Table Analyzed"_x0009_"Ide
Table Analyzed	Identify outliers of Data 1:Cleaned data
Data sets analyzed	A-G					Compare column means (main column effect)
Nested one-way ANOVA						Number of families	1
P value	<0.0001					Number of comparisons per family	6
P value summary	****					Alpha	0.05
Significantly different (P < 0.05)?	Yes
F, DFn, Dfd	15.06, 6, 14					Dunnett's multiple comparisons test	Mean Diff.	95.00% CI of diff.	Below threshold?	Summary	Adjusted P Value
						pMCB306 vs. FBF1 KO	0.2821	0.07496 to 0.4893	Yes	**	0.0065
Random effects	SD	Variance				pMCB306 vs. CEP89 KO	0.2847	0.08055 to 0.4888	Yes	**	0.0054
Variation within subcolumns	0.5181	0.2684				pMCB306 vs. ANKRD26 KO	0.614	0.3796 to 0.8483	Yes	****	<0.0001
Variation among subcolumn means	0.06632	0.004399				pMCB306 vs. INPP5E KO	0.2985	0.1036 to 0.4933	Yes	**	0.0025
						pMCB306 vs. KIZ KO	0.001049	-0.1929 to 0.1950	No	ns	>0.9999
Do the subcolumns differ (within each column)?						pMCB306 vs. sgLRRC45	0.1241	-0.07202 to 0.3201	No	ns	0.3232
Chi-square, df	9.382, 1
P value	0.0022					Test details	Mean 1	Mean 2	Mean Diff.	SE of diff.	N1	N2	q	DF
P value summary	**					pMCB306 vs. FBF1 KO	0.9946	0.7125	0.2821	0.0701	397	209	4.025	14
Is there significant difference between subcolumns (P < 0.05)?	Yes					pMCB306 vs. CEP89 KO	0.9946	0.7099	0.2847	0.06907	397	232	4.122	14
						pMCB306 vs. ANKRD26 KO	0.9946	0.3807	0.614	0.07929	397	105	7.743	14
Data analyzed						pMCB306 vs. INPP5E KO	0.9946	0.6962	0.2985	0.06593	397	371	4.527	14
Number of treatments (columns)	7					pMCB306 vs. KIZ KO	0.9946	0.9936	0.001049	0.06561	397	387	0.01599	14
Number of subjects (subcolumns)	21					pMCB306 vs. sgLRRC45	0.9946	0.8706	0.1241	0.06634	397	339	1.87	14
Total number of values	2040
