# Supplementary material for: A hierarchical pathway for assembly of the distal appendages that organize primary cilia
Source: eLife. 2025 Jan 30;14:e85999. doi: 10.7554/eLife.85999 (PMC11984956; doi:10.7554/eLife.85999)
Supplement: Figure 5—figure supplement 1—source data 4. [file elife-85999-fig5-figsupp1-data4.xlsx]

## Sheet: KAN582
	Label	Area	Mean	Min	Max	X	Y	Circ	IntDen	RawIntDen	AR	Round	Solidity
731	ARL13B_KAN582-1_1.tif:0001-0006	1.456	569.357	126	1554	137.65	0.832	0.484	829.034	31884	2.896	0.345	0.778	0.374878
732	ARL13B_KAN582-1_1.tif:0002-0105	3.068	538.475	124	1816	168.207	16.875	0.428	1652.14	63540	4.006	0.25	0.726	0.747076
733	ARL13B_KAN582-1_1.tif:0003-0117	2.444	487.734	122	1054	19.961	18.931	0.39	1192.09	45847	5.574	0.179	0.732	0.539049
734	ARL13B_KAN582-1_1.tif:0004-0175	4.394	726.414	133	2415	71.264	28.191	0.476	3192.06	122764	3.946	0.253	0.824	1.44341
735	ARL13B_KAN582-1_1.tif:0005-0230	4.264	671.97	54	1820	33.569	37.16	0.506	2865.45	110203	3.986	0.251	0.87	1.29572
736	ARL13B_KAN582-1_1.tif:0006-0293	4.576	663.017	29	2004	149.473	47.056	0.455	3034.15	116691	3.353	0.298	0.705	1.372
737	ARL13B_KAN582-1_1.tif:0007-0388	4.706	595.569	114	2619	97.123	62.444	0.388	2802.92	107798	4.645	0.215	0.71	1.26744
738	ARL13B_KAN582-1_1.tif:0008-0430	3.146	398.05	155	1113	45.085	69.557	0.462	1252.34	48164	3.768	0.265	0.781	0.566292
739	ARL13B_KAN582-1_1.tif:0009-0498	4.498	898.873	95	2873	143.16	80.496	0.422	4043.37	155505	4.289	0.233	0.706	1.82836
740	ARL13B_KAN582-1_1.tif:0010-0562	4.654	259.19	138	446	70.59	90.787	0.538	1206.34	46395	3.455	0.289	0.81	0.545493
741	ARL13B_KAN582-1_1.tif:0011-0629	3.068	403.068	85	1024	23.817	101.492	0.352	1236.69	47562	5.634	0.177	0.774	0.559214
742	ARL13B_KAN582-1_1.tif:0012-0681	3.9	759.2	109	1856	34.23	109.978	0.28	2961.06	113880	4.928	0.203	0.612	1.33895
743	ARL13B_KAN582-1_1.tif:0013-0685	3.068	1388.76	158	5234	190.749	110.608	0.553	4260.98	163874	3.407	0.294	0.894	1.92676
744	ARL13B_KAN582-1_1.tif:0014-0707	4.264	1610.24	91	7113	138.347	114.249	0.572	6866.47	264079	2.947	0.339	0.794	3.10493
745	ARL13B_KAN582-1_1.tif:0015-0715	3.822	445.578	58	1212	57.284	115.453	0.444	1703.1	65500	3.013	0.332	0.682	0.770121
746	ARL13B_KAN582-1_1.tif:0016-0756	4.186	892.366	65	3056	80.058	122.031	0.447	3735.67	143671	4.206	0.238	0.799	1.68922
747	ARL13B_KAN582-1_1.tif:0017-0771	3.146	618.694	92	1456	36.47	124.259	0.492	1946.53	74862	3.782	0.264	0.804	0.880195
748	ARL13B_KAN582-1_1.tif:0018-0791	2.522	591.68	101	2195	163.555	127.455	0.375	1492.31	57393	4.732	0.211	0.664	0.674802
749	ARL13B_KAN582-1_1.tif:0019-0891	3.016	700.233	68	2766	61.154	143.702	0.504	2112.03	81227	3.123	0.32	0.829	0.955032
750	ARL13B_KAN582-1_1.tif:0020-0981	2.834	525	74	1791	89.712	158.231	0.453	1487.94	57225	4.745	0.211	0.832	0.672827
751	ARL13B_KAN582-1_1.tif:0021-1000	3.796	781.733	40	2270	102.003	161.273	0.393	2967.64	114133	5.005	0.2	0.704	1.34193
752	ARL13B_KAN582-1_1.tif:0022-1009	2.236	789.64	150	2471	60.827	162.544	0.492	1765.74	67909	3.015	0.332	0.672	0.798445
753	ARL13B_KAN582-1_1.tif:0023-1032	0.988	396.184	48	1460	37.813	166.542	0.579	391.454	15055	1.962	0.51	0.697	0.17701
754	ARL13B_KAN582-1_2.tif:0001-0011	3.978	432.026	141	1125	62.337	1.983	0.433	1718.7	66100	4.599	0.217	0.763	0.777175
755	ARL13B_KAN582-1_2.tif:0002-0010	3.796	537.479	40	1448	202.489	1.471	0.456	2040.39	78472	2.88	0.347	0.694	0.92264
756	ARL13B_KAN582-1_2.tif:0003-0021	1.872	754.528	144	2375	75.066	3.465	0.535	1412.56	54326	3.324	0.301	0.762	0.638742
757	ARL13B_KAN582-1_2.tif:0004-0080	2.288	371.625	63	1008	15.432	12.84	0.287	850.329	32703	6.705	0.149	0.688	0.384508
758	ARL13B_KAN582-1_2.tif:0005-0130	4.082	541.172	153	1379	25.773	21.121	0.365	2209.2	84964	4.533	0.221	0.72	0.99897
759	ARL13B_KAN582-1_2.tif:0006-0165	3.692	255.711	55	440	48.987	26.92	0.46	944.143	36311	3.104	0.322	0.701	0.426929
760	ARL13B_KAN582-1_2.tif:0007-0208	5.252	506.173	113	1168	71.799	33.421	0.596	2658.58	102247	3.077	0.325	0.845	1.20218
761	ARL13B_KAN582-1_2.tif:0008-0240	3.406	415.489	92	1490	155.161	38.701	0.511	1415.24	54429	3.51	0.285	0.766	0.639953
762	ARL13B_KAN582-1_2.tif:0009-0305	3.692	736.401	135	2408	218.192	49.207	0.489	2718.96	104569	3.685	0.271	0.798	1.22948
763	ARL13B_KAN582-1_2.tif:0010-0340	3.328	787.141	88	3466	52.99	54.914	0.487	2619.76	100754	3.267	0.306	0.788	1.18462
764	ARL13B_KAN582-1_2.tif:0011-0431	3.588	361.442	125	802	81.286	69.562	0.552	1296.93	49879	3.537	0.283	0.857	0.586456
765	ARL13B_KAN582-1_2.tif:0012-0450	5.07	574.79	114	1662	93.744	72.418	0.487	2914.36	112084	3.81	0.262	0.799	1.31784
766	ARL13B_KAN582-1_2.tif:0013-0491	3.302	344.008	146	645	29.813	79.074	0.584	1135.98	43689	2.764	0.362	0.812	0.513677
767	ARL13B_KAN582-1_2.tif:0014-0534	3.588	1004.65	24	3926	208.3	86.196	0.512	3604.91	138642	3.376	0.296	0.758	1.63009
768	ARL13B_KAN582-1_2.tif:0015-0590	4.498	430.358	93	1617	88.557	95.237	0.542	1935.87	74452	3.503	0.285	0.85	0.875375
769	ARL13B_KAN582-1_2.tif:0016-0636	5.486	731.972	124	3386	131.097	102.652	0.517	4015.84	154446	2.535	0.394	0.756	1.81591
770	ARL13B_KAN582-1_2.tif:0017-0678	4.238	673.35	122	2537	68.152	109.319	0.564	2853.83	109756	3.117	0.321	0.856	1.29046
771	ARL13B_KAN582-1_2.tif:0018-0683	2.626	881.535	80	2555	102.085	110.181	0.524	2315.05	89035	3.476	0.288	0.808	1.04684
772	ARL13B_KAN582-1_2.tif:0019-0713	5.538	452.075	141	1270	22.516	114.981	0.537	2503.74	96292	3.975	0.252	0.861	1.13216
773	ARL13B_KAN582-1_2.tif:0020-0763	3.38	666.877	148	1995	200.441	123.085	0.489	2254.18	86694	3.992	0.25	0.867	1.01931
774	ARL13B_KAN582-1_2.tif:0021-0838	4.004	1058.08	153	3360	165.28	135.232	0.574	4236.8	162944	3.456	0.289	0.885	1.91583
775	ARL13B_KAN582-1_2.tif:0022-0853	4.082	756.605	138	1796	71.635	137.548	0.517	3088.65	118787	4.063	0.246	0.867	1.39665
776	ARL13B_KAN582-1_2.tif:0023-0913	3.016	255.957	94	754	115.854	147.252	0.451	772.012	29691	4.089	0.245	0.737	0.349094
777	ARL13B_KAN582-1_3.tif:0001-0132	2.002	219.182	146	325	22.375	21.232	0.436	438.828	16877	4.225	0.237	0.706	0.198433
778	ARL13B_KAN582-1_3.tif:0002-0201	3.12	773.05	152	2779	76.928	32.325	0.585	2412.06	92766	3.215	0.311	0.83	1.0907
779	ARL13B_KAN582-1_3.tif:0003-0242	3.822	610.667	4	2029	155.706	39.002	0.553	2334.11	89768	3.581	0.279	0.87	1.05545
780	ARL13B_KAN582-1_3.tif:0004-0307	2.054	438.329	114	984	5.918	49.648	0.523	900.382	34628	3.692	0.271	0.845	0.407141
781	ARL13B_KAN582-1_3.tif:0005-0350	5.226	674.662	151	2155	143.209	56.568	0.474	3525.99	135607	4.032	0.248	0.812	1.59441
782	ARL13B_KAN582-1_3.tif:0006-0418	3.406	466.069	42	1310	112.728	67.436	0.485	1587.53	61055	3.772	0.265	0.777	0.717859
783	ARL13B_KAN582-1_3.tif:0007-0479	3.198	1122.53	80	4451	196.077	77.182	0.48	3590.06	138071	3.503	0.286	0.796	1.62338
784	ARL13B_KAN582-1_3.tif:0008-0502	5.382	1091.54	151	3782	149.494	80.846	0.548	5875.03	225949	3.553	0.281	0.852	2.65661
785	ARL13B_KAN582-1_3.tif:0009-0526	3.406	438.626	127	1165	114.993	84.816	0.49	1494.05	57460	3.51	0.285	0.768	0.67559
786	ARL13B_KAN582-1_3.tif:0010-0585	3.276	509.968	150	1423	19.025	94.317	0.59	1670.76	64256	3.078	0.325	0.869	0.755494
787	ARL13B_KAN582-1_3.tif:0011-0605	4.862	921.316	150	3026	194.965	97.472	0.373	4479.71	172286	4.887	0.205	0.725	2.02566
788	ARL13B_KAN582-1_3.tif:0012-0656	3.588	620.094	116	1698	216.991	105.807	0.352	2225.03	85573	3.923	0.255	0.64	1.00613
789	ARL13B_KAN582-1_3.tif:0013-0696	4.784	555.13	71	2233	113.427	112.128	0.506	2655.9	102144	2.798	0.357	0.729	1.20097
790	ARL13B_KAN582-1_3.tif:0014-0759	3.302	680.74	93	1852	29.01	122.472	0.51	2247.94	86454	3.501	0.286	0.767	1.01649
791	ARL13B_KAN582-1_3.tif:0015-0890	2.366	561.418	81	2119	44.518	143.607	0.426	1328.39	51089	4.606	0.217	0.722	0.600683
792	ARL13B_KAN582-1_3.tif:0016-0894	2.678	499.058	97	1443	166.904	144.529	0.4	1336.56	51403	3.35	0.299	0.654	0.604374
793	ARL13B_KAN582-1_3.tif:0017-0914	2.886	355.162	36	944	187.835	147.486	0.252	1025.06	39423	4.569	0.219	0.519	0.463519
794	ARL13B_KAN582-1_3.tif:0018-0939	2.028	254.692	76	450	147.19	151.042	0.291	516.547	19866	3.651	0.274	0.545	0.233576
795	ARL13B_KAN582-1_3.tif:0019-0938	2.964	522.684	151	1390	71.173	151.155	0.543	1549.33	59586	3.377	0.296	0.778	0.700587
796	ARL13B_KAN582-1_3.tif:0020-0945	4.004	376.026	77	1082	95.277	152.51	0.448	1505.7	57908	3.849	0.26	0.764	0.680857
797	ARL13B_KAN582-1_3.tif:0021-0997	3.302	793.457	150	2702	109.411	160.849	0.498	2620.15	100769	3.324	0.301	0.825	1.1848
798	ARL13B_KAN582-1_3.tif:0022-1027	3.172	756.139	142	2547	151.623	165.428	0.372	2398.62	92249	4.597	0.218	0.682	1.08462
799	ARL13B_KAN582-1_3.tif:0023-1028	2.678	577.592	150	1852	163.436	165.844	0.495	1546.88	59492	3.823	0.262	0.802	0.699481
800	ARL13B_KAN582-1_4.tif:0001-0056	3.38	471.138	115	1665	37.472	9.063	0.42	1592.54	61248	4.912	0.204	0.839	0.720128
801	ARL13B_KAN582-1_4.tif:0002-0073	3.77	494.476	76	1567	182.927	11.859	0.572	1864.29	71699	2.815	0.355	0.784	0.843006
802	ARL13B_KAN582-1_4.tif:0003-0290	3.354	561.209	112	1821	67.466	46.846	0.468	1882.41	72396	4.355	0.23	0.809	0.851201
803	ARL13B_KAN582-1_4.tif:0004-0315	4.316	711.705	111	2633	114.785	50.764	0.423	3071.9	118143	3.361	0.298	0.693	1.38907
804	ARL13B_KAN582-1_4.tif:0005-0342	3.77	783.559	102	2085	166.094	55.395	0.413	2954.19	113616	3.547	0.282	0.668	1.33585
805	ARL13B_KAN582-1_4.tif:0006-0351	4.524	1271.63	116	4379	140.434	56.481	0.445	5753.18	221263	3.903	0.256	0.728	2.60152
806	ARL13B_KAN582-1_4.tif:0007-0391	2.99	608.983	71	2154	217.374	63.026	0.546	1820.97	70033	3.38	0.296	0.83	0.823418
807	ARL13B_KAN582-1_4.tif:0008-0398	4.758	266.12	42	496	118.573	63.927	0.588	1266.28	48700	2.572	0.389	0.836	0.572594
808	ARL13B_KAN582-1_4.tif:0009-0550	3.432	674.182	40	1970	74.854	88.935	0.546	2313.93	88992	3.496	0.286	0.833	1.04633
809	ARL13B_KAN582-1_4.tif:0010-0558	2.938	577.77	96	1470	218.943	90.145	0.513	1697.59	65288	3.638	0.275	0.822	0.767628
810	ARL13B_KAN582-1_4.tif:0011-0691	4.368	814.196	152	2462	33.748	111.204	0.358	3556.62	136785	5.276	0.19	0.748	1.60826
811	ARL13B_KAN582-1_4.tif:0012-0718	3.406	677.84	85	2157	94.221	115.698	0.494	2308.86	88797	2.715	0.368	0.689	1.04404
812	ARL13B_KAN582-1_4.tif:0013-0741	4.16	640.181	100	1990	55.801	119.438	0.39	2663.31	102429	3.724	0.269	0.657	1.20432
813	ARL13B_KAN582-1_4.tif:0014-0916	2.652	222.843	86	487	64.223	147.765	0.537	591.016	22730	2.676	0.374	0.764	0.26725
814	ARL13B_KAN582-1_4.tif:0015-0940	4.966	406.204	48	1121	88.425	151.751	0.542	2017.33	77585	3.124	0.32	0.827	0.912211
815	ARL13B_KAN582-1_4.tif:0016-0981	2.86	423.4	118	1417	163.377	158.15	0.343	1211	46574	5.858	0.171	0.673	0.547597
816	ARL13B_KAN582-1_4.tif:0017-0980	1.846	381.408	112	821	5.976	158.326	0.322	704.122	27080	3.861	0.259	0.542	0.318395
817	ARL13B_KAN582-1_4.tif:0018-0996	1.664	297.359	49	569	26.374	160.928	0.318	494.836	19031	3.505	0.285	0.522	0.223758
818	ARL13B_KAN582-1_5.tif:0001-0023	4.654	409.101	0	929	96.498	4.097	0.58	1904.07	73229	1.542	0.648	0.762	0.860995
819	ARL13B_KAN582-1_5.tif:0002-0108	3.406	608.237	151	1802	38.419	17.482	0.552	2071.78	79679	3.426	0.292	0.859	0.936832
820	ARL13B_KAN582-1_5.tif:0003-0131	4.264	659.567	150	2639	76.251	21.175	0.446	2812.56	108169	4.293	0.233	0.783	1.2718
821	ARL13B_KAN582-1_5.tif:0004-0149	2.964	565.263	81	1870	210.397	23.922	0.506	1675.54	64440	3.759	0.266	0.826	0.757658
822	ARL13B_KAN582-1_5.tif:0005-0193	3.406	218.015	69	452	131.749	30.934	0.547	742.605	28560	2.046	0.489	0.789	0.335796
823	ARL13B_KAN582-1_5.tif:0006-0213	3.978	886.876	108	3199	104.862	34.274	0.475	3528.2	135692	3.679	0.272	0.807	1.59541
824	ARL13B_KAN582-1_5.tif:0007-0237	2.132	248.293	21	514	192.249	38.269	0.474	529.392	20360	3.152	0.317	0.704	0.239384
825	ARL13B_KAN582-1_5.tif:0008-0286	3.458	766.083	113	2395	222.556	46.129	0.456	2649.27	101889	4.353	0.23	0.789	1.19797
826	ARL13B_KAN582-1_5.tif:0009-0296	2.002	506.052	9	1315	14.442	47.517	0.539	1013.18	38966	2.663	0.375	0.806	0.458146
827	ARL13B_KAN582-1_5.tif:0010-0313	2.912	354.098	68	1114	81.076	50.581	0.568	1031.2	39659	3.329	0.3	0.865	0.466294
828	ARL13B_KAN582-1_5.tif:0011-0370	3.64	750.664	30	2426	49.634	59.623	0.56	2732.58	105093	3.165	0.316	0.843	1.23564
829	ARL13B_KAN582-1_5.tif:0012-0407	3.77	1068.15	119	3437	174.645	65.57	0.5	4027.18	154882	4.183	0.239	0.85	1.82104
830	ARL13B_KAN582-1_5.tif:0013-0439	4.602	520.605	150	1669	111.81	70.855	0.411	2395.97	92147	4.8	0.208	0.801	1.08342
831	ARL13B_KAN582-1_5.tif:0014-0475	2.21	407.871	33	1045	140.505	76.604	0.523	901.448	34669	3.161	0.316	0.773	0.407623
832	ARL13B_KAN582-1_5.tif:0015-0490	4.81	789.211	130	2492	80.843	78.94	0.352	3796.33	146004	4.051	0.247	0.628	1.71665
833	ARL13B_KAN582-1_5.tif:0016-0566	4.42	461.494	73	1185	53.57	91.253	0.583	2039.93	78454	2.594	0.386	0.766	0.922428
834	ARL13B_KAN582-1_5.tif:0017-0589	3.328	616.625	105	2414	210.453	95.019	0.421	2052.25	78928	3.463	0.289	0.698	0.928002
835	ARL13B_KAN582-1_5.tif:0018-0606	2.912	257.661	20	819	118.323	97.916	0.175	750.353	28858	5.291	0.189	0.423	0.3393
836	ARL13B_KAN582-1_5.tif:0019-0625	3.9	700.027	92	2060	173.023	101.039	0.513	2730.27	105004	3.837	0.261	0.85	1.23459
837	ARL13B_KAN582-1_5.tif:0020-0641	0.338	109	0	198	131.735	103.442	0.36	36.844	1417	4.975	0.201	0.553	0.0166605
838	ARL13B_KAN582-1_5.tif:0021-0684	3.38	443.246	17	2069	148.094	110.09	0.483	1498.26	57622	2.577	0.388	0.693	0.677495
839	ARL13B_KAN582-1_5.tif:0022-0787	3.978	433.948	104	1044	164.218	126.79	0.597	1726.35	66394	2.447	0.409	0.85	0.780632
840	ARL13B_KAN582-1_5.tif:0023-0791	3.536	574.287	31	2139	51.934	127.531	0.424	2030.8	78103	4.258	0.235	0.735	0.918302
841	ARL13B_KAN582-1_5.tif:0024-0853	4.004	468.61	144	992	189.185	137.488	0.51	1876.43	72166	3.071	0.326	0.8	0.848497
842	ARL13B_KAN582-1_5.tif:0025-0933	3.38	1045.05	103	3451	155.093	150.34	0.461	3532.49	135857	4.514	0.222	0.807	1.59735
843	ARL13B_KAN582-1_5.tif:0026-0936	1.066	295.244	152	587	13.838	150.893	0.502	314.749	12105	3.932	0.254	0.689	0.142325
844	ARL13B_KAN582-1_5.tif:0027-0978	3.666	251.035	131	486	177.65	157.43	0.318	920.351	35396	5.576	0.179	0.667	0.416171
845	ARL13B_KAN582-1_5.tif:0028-1001	3.432	627.689	133	2126	111.01	161.361	0.397	2154.36	82855	4.885	0.205	0.737	0.974174
846	ARL13B_KAN582-1_6.tif:0001-0089	2.6	772.93	150	2090	176.935	14.419	0.502	2009.74	77293	3.834	0.261	0.84	0.908778
847	ARL13B_KAN582-1_6.tif:0002-0142	3.276	593.508	42	1778	207.279	22.665	0.365	1944.45	74782	4.012	0.249	0.653	0.879255
848	ARL13B_KAN582-1_6.tif:0003-0179	4.394	631.402	87	1495	110.589	28.815	0.554	2774.55	106707	2.928	0.341	0.818	1.25462
849	ARL13B_KAN582-1_6.tif:0004-0240	3.666	1014.57	102	3497	130.276	38.812	0.523	3719.65	143055	3.33	0.3	0.766	1.68198
850	ARL13B_KAN582-1_6.tif:0005-0250	3.458	936.857	118	2990	142.898	40.202	0.514	3239.85	124602	2.885	0.347	0.725	1.46502
851	ARL13B_KAN582-1_6.tif:0006-0305	2.704	474.962	109	1730	79.958	49.144	0.475	1284.37	49396	3.902	0.256	0.74	0.580777
852	ARL13B_KAN582-1_6.tif:0007-0329	4.446	1138.26	127	3996	110.888	53	0.514	5061	194642	3.391	0.295	0.805	2.28852
853	ARL13B_KAN582-1_6.tif:0008-0330	4.576	697.648	150	2618	25.544	53.301	0.443	3192.63	122786	4.124	0.242	0.787	1.44367
854	ARL13B_KAN582-1_6.tif:0009-0438	4.186	1147.44	110	4335	156.23	70.631	0.467	4803.48	184738	3.301	0.303	0.712	2.17207
855	ARL13B_KAN582-1_6.tif:0010-0490	3.146	847.099	158	2196	53.536	79.133	0.514	2665.13	102499	3.899	0.256	0.883	1.20514
856	ARL13B_KAN582-1_6.tif:0011-0542	2.73	459.705	146	1070	207.265	87.374	0.598	1255.07	48269	2.987	0.335	0.879	0.567526
857	ARL13B_KAN582-1_6.tif:0012-0558	3.224	1154.72	118	3892	114.043	89.899	0.581	3723.03	143185	3.385	0.295	0.895	1.68351
858	ARL13B_KAN582-1_6.tif:0013-0661	3.51	243.267	35	564	15.211	106.891	0.525	853.917	32841	1.478	0.677	0.718	0.38613
859	ARL13B_KAN582-1_6.tif:0014-0665	2.886	1160.71	150	3414	105.073	107.273	0.52	3350.02	128839	3.623	0.276	0.801	1.51483
860	ARL13B_KAN582-1_6.tif:0015-0710	3.38	752.046	138	3061	54.573	114.736	0.45	2542.07	97766	4.265	0.234	0.785	1.14949
861	ARL13B_KAN582-1_6.tif:0016-0725	5.2	457.805	92	1033	169.075	116.786	0.512	2380.73	91561	3.846	0.26	0.871	1.07653
862	ARL13B_KAN582-1_6.tif:0017-0872	3.588	209.5	69	405	113.129	140.513	0.573	751.731	28911	2.257	0.443	0.789	0.339923
863	ARL13B_KAN582-1_6.tif:0018-0875	2.964	230.588	72	480	220.044	141.163	0.484	683.503	26287	1.994	0.502	0.745	0.309071
864	ARL13B_KAN582-1_6.tif:0019-0889	3.874	387.262	59	821	205.342	143.606	0.519	1500.34	57702	2.908	0.344	0.819	0.678435
865	ARL13B_KAN582-1_6.tif:0020-0908	3.172	543.18	93	1334	41.774	146.287	0.374	1723.07	66268	5.348	0.187	0.782	0.779151
866	ARL13B_KAN582-1_6.tif:0021-0939	2.912	712.634	121	2119	95.168	151.224	0.421	2075.32	79815	4.133	0.242	0.667	0.938431
867	ARL13B_KAN582-1_6.tif:0022-0958	2.782	820.28	93	2820	184.23	154.573	0.583	2282.16	87770	2.748	0.364	0.808	1.03196
868	ARL13B_KAN582-1_6.tif:0023-1001	4.186	1039.2	111	3282	160.411	161.532	0.459	4350.37	167312	4.155	0.241	0.801	1.96718
										85051.6				1
869	ARL13B_KAN582-5_1.tif:0001-0130	3.874	328.121	0	1117	208.161	21.008	0.351	1271.22	48890	2.685	0.372	0.583	0.574828
870	ARL13B_KAN582-5_1.tif:0002-0141	2.756	851.623	52	3105	194.845	22.975	0.52	2347.21	90272	3.113	0.321	0.757	1.06138
871	ARL13B_KAN582-5_1.tif:0003-0192	3.848	325.432	120	758	75.159	30.886	0.413	1252.34	48164	3.371	0.297	0.734	0.566292
872	ARL13B_KAN582-5_1.tif:0004-0216	3.328	438.602	131	1462	55.827	34.956	0.362	1459.75	56141	5.463	0.183	0.629	0.660082
873	ARL13B_KAN582-5_1.tif:0005-0266	2.964	306.737	104	606	171.216	42.778	0.389	909.223	34968	4.746	0.211	0.715	0.411139
874	ARL13B_KAN582-5_1.tif:0006-0336	1.976	272.618	106	820	78.58	54.239	0.318	538.726	20719	4.832	0.207	0.559	0.243605
875	ARL13B_KAN582-5_1.tif:0007-0444	1.794	528.522	154	1402	222.86	71.669	0.557	948.225	36468	3.409	0.293	0.758	0.428775
876	ARL13B_KAN582-5_1.tif:0008-0470	2.522	677.701	150	2331	112.088	75.812	0.515	1709.27	65737	4.051	0.247	0.805	0.772907
877	ARL13B_KAN582-5_1.tif:0009-0478	5.876	402.128	82	1144	149.238	76.992	0.405	2363.05	90881	3.192	0.313	0.676	1.06854
878	ARL13B_KAN582-5_1.tif:0010-0477	1.716	202.606	97	384	24.305	76.965	0.515	347.693	13372	3.558	0.281	0.815	0.157222
879	ARL13B_KAN582-5_1.tif:0011-0551	3.354	290.705	47	526	62.408	88.966	0.485	975.085	37501	3.733	0.268	0.83	0.440921
880	ARL13B_KAN582-5_1.tif:0012-0637	1.872	266.889	100	429	12.898	102.718	0.588	499.646	19216	2.254	0.444	0.8	0.225933
881	ARL13B_KAN582-5_1.tif:0013-0649	4.914	366.64	47	1258	189.239	104.258	0.319	1801.78	69295	6.428	0.156	0.708	0.814741
882	ARL13B_KAN582-5_1.tif:0014-0773	3.484	958.104	72	3849	165.541	124.999	0.574	3338.24	128386	2.463	0.406	0.751	1.50951
883	ARL13B_KAN582-5_1.tif:0015-0880	3.588	523.529	122	1335	200.479	142.076	0.504	1878.54	72247	3.753	0.266	0.8	0.849449
884	ARL13B_KAN582-5_1.tif:0016-0878	1.82	559.257	150	1947	221.067	141.529	0.551	1017.91	39148	3.23	0.31	0.773	0.460285
885	ARL13B_KAN582-5_1.tif:0017-0875	3.51	423.133	120	1098	169.625	141.192	0.574	1485.29	57123	3.427	0.292	0.928	0.671628
886	ARL13B_KAN582-5_1.tif:0018-0890	3.302	325.811	102	780	107.699	143.596	0.546	1075.89	41378	2.989	0.335	0.825	0.486505
887	ARL13B_KAN582-5_1.tif:0019-0980	2.886	748.928	59	2372	130.974	158.03	0.431	2161.54	83131	3.999	0.25	0.725	0.977419
888	ARL13B_KAN582-5_2.tif:0001-0045	3.198	1037.93	43	3165	178.605	7.246	0.468	3319.52	127666	4.027	0.248	0.817	1.50104
889	ARL13B_KAN582-5_2.tif:0002-0049	4.55	471.269	94	1368	90.288	8.153	0.506	2144.4	82472	2.986	0.335	0.746	0.96967
890	ARL13B_KAN582-5_2.tif:0003-0159	4.29	674.576	134	2009	73.692	25.521	0.37	2894.1	111305	3.891	0.257	0.669	1.30868
891	ARL13B_KAN582-5_2.tif:0004-0206	2.834	609.578	46	1882	126.925	33.613	0.392	1727.65	66444	2.537	0.394	0.589	0.78122
892	ARL13B_KAN582-5_2.tif:0005-0326	5.642	625.235	0	2359	99.95	52.474	0.441	3527.79	135676	2.649	0.378	0.643	1.59522
893	ARL13B_KAN582-5_2.tif:0006-0336	3.588	331.094	114	1017	2.547	54.199	0.347	1188.04	45691	6	0.167	0.717	0.537215
894	ARL13B_KAN582-5_2.tif:0007-0387	3.224	596.25	96	1880	204.059	62.521	0.35	1922.43	73935	5.848	0.171	0.765	0.869296
895	ARL13B_KAN582-5_2.tif:0008-0449	3.666	280.014	79	653	149.225	72.381	0.426	1026.59	39482	3.86	0.259	0.686	0.464212
896	ARL13B_KAN582-5_2.tif:0009-0472	3.588	876.297	139	2630	47.59	75.99	0.472	3144.34	120929	4.142	0.241	0.826	1.42183
897	ARL13B_KAN582-5_2.tif:0010-0516	3.094	533.605	128	1717	193.846	83.035	0.39	1651.07	63499	5.186	0.193	0.737	0.746594
898	ARL13B_KAN582-5_2.tif:0011-0517	3.25	761.016	150	2689	171.367	83.327	0.446	2473.45	95127	3.766	0.266	0.704	1.11846
899	ARL13B_KAN582-5_2.tif:0012-0521	4.316	850.482	74	3393	111.739	83.943	0.394	3670.9	141180	4.435	0.225	0.692	1.65993
900	ARL13B_KAN582-5_2.tif:0013-0616	3.198	722.415	96	3345	89.207	99.703	0.414	2310.42	88857	3.359	0.298	0.654	1.04474
901	ARL13B_KAN582-5_2.tif:0014-0681	2.704	584.317	67	1932	151.065	109.938	0.5	1580.09	60769	3.47	0.288	0.703	0.714496
902	ARL13B_KAN582-5_2.tif:0015-0704	3.354	417.643	131	899	7.909	113.621	0.495	1400.86	53876	4.091	0.244	0.851	0.633451
903	ARL13B_KAN582-5_2.tif:0016-0828	3.588	401.362	149	925	34.532	133.687	0.377	1440.17	55388	4.499	0.222	0.687	0.651228
904	ARL13B_KAN582-5_2.tif:0017-0871	3.224	313.065	59	742	88.329	140.328	0.357	1009.38	38820	6.296	0.159	0.787	0.456429
905	ARL13B_KAN582-5_2.tif:0018-0915	3.9	556.653	61	1789	33.83	147.73	0.497	2171.08	83498	3.537	0.283	0.767	0.981734
906	ARL13B_KAN582-5_2.tif:0019-0928	2.73	297.257	61	761	129.79	149.908	0.319	811.561	31212	3.572	0.28	0.54	0.366977
907	ARL13B_KAN582-5_2.tif:0020-0927	0.416	191.312	135	303	112.714	149.549	0.484	79.591	3061	3.658	0.273	0.627	0.0359899
908	ARL13B_KAN582-5_2.tif:0021-0997	3.458	1141.19	90	3931	151.186	160.874	0.541	3946.49	151779	3.28	0.305	0.804	1.78455
909	ARL13B_KAN582-5_3.tif:0001-0013	2.574	364.354	94	1165	114.918	2.108	0.455	937.902	36071	3.627	0.276	0.7	0.424107
910	ARL13B_KAN582-5_3.tif:0002-0075	3.068	558.602	110	1710	59.796	11.926	0.545	1713.89	65915	2.948	0.339	0.756	0.775
911	ARL13B_KAN582-5_3.tif:0003-0098	1.794	279.754	58	517	17.526	15.822	0.266	501.908	19303	4.785	0.209	0.533	0.226956
912	ARL13B_KAN582-5_3.tif:0004-0115	2.08	410.262	138	1137	27.346	18.759	0.356	853.397	32821	3.93	0.254	0.597	0.385895
913	ARL13B_KAN582-5_3.tif:0005-0136	0.832	224.031	87	551	41.769	21.834	0.453	186.405	7169	2.862	0.349	0.627	0.08429
914	ARL13B_KAN582-5_3.tif:0006-0234	2.678	775.981	26	2384	192.137	37.702	0.491	2078.2	79926	3.012	0.332	0.73	0.939736
915	ARL13B_KAN582-5_3.tif:0007-0249	3.64	834.829	85	2739	166.116	40.107	0.435	3038.96	116876	3.309	0.302	0.711	1.37418
916	ARL13B_KAN582-5_3.tif:0008-0267	1.924	512.432	156	1374	1.416	43.115	0.364	985.979	37920	6.204	0.161	0.722	0.445847
917	ARL13B_KAN582-5_3.tif:0009-0292	3.276	255.77	29	610	64.41	47.088	0.358	837.952	32227	3.921	0.255	0.625	0.378911
918	ARL13B_KAN582-5_3.tif:0010-0426	4.238	314.975	50	958	31.589	68.872	0.328	1334.95	51341	6.392	0.156	0.728	0.603645
919	ARL13B_KAN582-5_3.tif:0011-0472	3.38	403.462	121	2035	81.196	75.949	0.407	1363.78	52450	4.272	0.234	0.684	0.616685
920	ARL13B_KAN582-5_3.tif:0012-0488	3.484	605.142	138	2099	182.759	78.832	0.413	2108.44	81089	4.239	0.236	0.665	0.95341
921	ARL13B_KAN582-5_3.tif:0013-0519	3.978	596.824	61	2140	44.607	83.86	0.479	2374.31	91314	2.994	0.334	0.713	1.07363
922	ARL13B_KAN582-5_3.tif:0014-0529	3.276	291.484	86	1005	3.368	85.516	0.353	954.96	36727	6.26	0.16	0.843	0.43182
923	ARL13B_KAN582-5_3.tif:0015-0540	1.066	469.805	155	1856	124.279	87.018	0.58	500.842	19262	2.851	0.351	0.707	0.226474
924	ARL13B_KAN582-5_3.tif:0016-0746	2.418	343.914	150	792	81.586	120.316	0.453	831.634	31984	4.205	0.238	0.729	0.376054
925	ARL13B_KAN582-5_3.tif:0017-0752	4.004	514.318	154	1639	41.016	121.444	0.524	2059.45	79205	3.347	0.299	0.806	0.931258
926	ARL13B_KAN582-5_3.tif:0018-0775	4.004	408.994	131	1066	9.698	125.016	0.497	1637.71	62985	3.48	0.287	0.764	0.740551
927	ARL13B_KAN582-5_3.tif:0019-0786	2.704	704.269	151	1909	217.148	126.93	0.459	1904.46	73244	3.743	0.267	0.791	0.861172
928	ARL13B_KAN582-5_3.tif:0020-0841	3.38	823.038	119	3097	163.871	135.898	0.437	2782.04	106995	3.822	0.262	0.691	1.258
929	ARL13B_KAN582-5_3.tif:0021-0889	4.238	1073.07	125	3460	151.781	143.137	0.367	4547.93	174910	4.561	0.219	0.7	2.05652
930	ARL13B_KAN582-5_3.tif:0022-0899	4.42	390.382	125	1089	33.63	145.123	0.359	1725.59	66365	4.818	0.208	0.705	0.780291
931	ARL13B_KAN582-5_3.tif:0023-0902	4.758	708.557	37	2179	121.699	145.666	0.399	3371.52	129666	2.604	0.384	0.67	1.52456
932	ARL13B_KAN582-5_3.tif:0024-0989	2.678	850.223	88	2140	188.691	159.544	0.583	2277.03	87573	3.387	0.295	0.837	1.02965
933	ARL13B_KAN582-5_4.tif:0001-0074	4.316	502.548	123	1362	60.377	11.889	0.51	2169.13	83423	3.742	0.267	0.828	0.980852
934	ARL13B_KAN582-5_4.tif:0002-0102	3.614	544.655	115	1793	188.945	16.535	0.366	1968.5	75707	5.13	0.195	0.749	0.89013
935	ARL13B_KAN582-5_4.tif:0003-0165	3.64	577.2	108	1554	87.629	26.512	0.486	2101.14	80808	3.519	0.284	0.761	0.950106
936	ARL13B_KAN582-5_4.tif:0004-0198	3.9	561.12	119	3061	127.724	31.961	0.362	2188.5	84168	5.458	0.183	0.719	0.989611
937	ARL13B_KAN582-5_4.tif:0005-0199	0.624	125.583	62	177	212.366	32.284	0.555	78.369	3014	2.168	0.461	0.762	0.0354373
938	ARL13B_KAN582-5_4.tif:0006-0262	2.522	284.969	127	712	41.522	42.358	0.518	718.735	27642	3.437	0.291	0.703	0.325003
939	ARL13B_KAN582-5_4.tif:0007-0378	2.262	249.552	110	509	204.19	61.052	0.595	564.52	21711	2.421	0.413	0.809	0.255269
940	ARL13B_KAN582-5_4.tif:0008-0430	2.652	883.784	151	2261	215.217	69.385	0.497	2343.94	90146	4.023	0.249	0.819	1.0599
941	ARL13B_KAN582-5_4.tif:0009-0441	4.862	526.904	106	1377	172.697	70.91	0.529	2561.96	98531	3.231	0.31	0.776	1.15849
942	ARL13B_KAN582-5_4.tif:0010-0462	4.264	471.616	151	1228	125.489	74.418	0.529	2011.09	77345	3.335	0.3	0.794	0.909389
943	ARL13B_KAN582-5_4.tif:0011-0471	4.342	461.587	120	1338	58.16	75.786	0.479	2004.33	77085	3.19	0.314	0.801	0.906332
944	ARL13B_KAN582-5_4.tif:0012-0494	4.654	800.151	0	3066	156.637	79.597	0.416	3724.13	143227	4.594	0.218	0.722	1.684
945	ARL13B_KAN582-5_4.tif:0013-0510	2.704	262.404	52	515	199.226	82.21	0.595	709.583	27290	2.138	0.468	0.835	0.320864
946	ARL13B_KAN582-5_4.tif:0014-0536	0.468	154.944	129	206	156.475	86.358	0.526	72.518	2789	3.301	0.303	0.667	0.0327919
947	ARL13B_KAN582-5_4.tif:0015-0654	2.782	521.009	152	1983	93.143	105.381	0.464	1449.54	55748	4.055	0.247	0.733	0.655461
948	ARL13B_KAN582-5_4.tif:0016-0712	2.938	553.54	108	1597	26.705	114.913	0.383	1626.4	62550	5.182	0.193	0.685	0.735436
949	ARL13B_KAN582-5_4.tif:0017-0725	2.158	479.771	113	1572	199.805	116.997	0.355	1035.41	39821	4.944	0.202	0.667	0.468198
950	ARL13B_KAN582-5_4.tif:0018-0843	5.096	478.714	142	1152	121.591	135.927	0.524	2439.68	93828	3.939	0.254	0.86	1.10319
951	ARL13B_KAN582-5_4.tif:0019-0853	1.3	183.26	128	248	79.264	137.562	0.57	238.252	9163	2.949	0.339	0.741	0.107735
952	ARL13B_KAN582-5_4.tif:0020-0867	3.484	891.746	123	3403	214.069	140.025	0.418	3107.03	119494	3.517	0.284	0.7	1.40496
953	ARL13B_KAN582-5_4.tif:0021-0938	3.562	610.949	70	2554	168.153	151.458	0.586	2176.33	83700	2.981	0.335	0.848	0.984109
954	ARL13B_KAN582-5_4.tif:0022-1024	3.068	492.254	68	1570	121.905	165.322	0.435	1510.33	58086	4.547	0.22	0.787	0.68295
955	ARL13B_KAN582-5_5.tif:0001-0005	0.624	216.292	73	363	21.231	0.685	0.308	134.974	5191	4.032	0.248	0.623	0.0610336
956	ARL13B_KAN582-5_5.tif:0002-0010	2.418	468.72	72	1357	63.866	1.709	0.473	1133.43	43591	3.534	0.283	0.765	0.512524
957	ARL13B_KAN582-5_5.tif:0003-0043	2.99	767.896	3	2711	152.54	6.822	0.466	2296.15	88308	2.929	0.341	0.712	1.03829
958	ARL13B_KAN582-5_5.tif:0004-0118	2.704	317.913	31	832	213.159	19.237	0.322	859.69	33063	5.283	0.189	0.623	0.388741
959	ARL13B_KAN582-5_5.tif:0005-0193	3.64	416.95	151	1141	18.87	31.143	0.509	1517.79	58373	3.387	0.295	0.773	0.686325
960	ARL13B_KAN582-5_5.tif:0006-0213	4.68	581.067	153	1662	39.407	34.576	0.526	2719.56	104592	3.005	0.333	0.756	1.22975
961	ARL13B_KAN582-5_5.tif:0007-0214	5.512	829.769	33	3293	154.669	34.511	0.362	4573.96	175911	3.695	0.271	0.655	2.06829
962	ARL13B_KAN582-5_5.tif:0008-0227	4.654	466.693	152	979	196.371	36.502	0.506	2172.12	83538	3.595	0.278	0.825	0.982204
963	ARL13B_KAN582-5_5.tif:0009-0263	3.952	482.303	75	1760	61.869	42.455	0.347	1906.17	73310	5.935	0.168	0.754	0.861948
964	ARL13B_KAN582-5_5.tif:0010-0369	3.51	400.207	16	906	216.632	59.731	0.578	1404.81	54028	2.296	0.436	0.774	0.635238
965	ARL13B_KAN582-5_5.tif:0011-0431	4.68	940.556	148	3658	151.035	69.209	0.453	4402.06	169300	3.213	0.311	0.72	1.99056
966	ARL13B_KAN582-5_5.tif:0012-0478	3.848	716.149	147	2235	158.875	77.087	0.396	2755.91	105990	4.038	0.248	0.693	1.24618
967	ARL13B_KAN582-5_5.tif:0013-0525	4.394	774.935	106	2624	137.077	84.714	0.406	3405.27	130964	5.056	0.198	0.765	1.53982
968	ARL13B_KAN582-5_5.tif:0014-0613	3.146	454.967	73	1411	111.515	98.822	0.407	1431.41	55051	3.668	0.273	0.67	0.647266
969	ARL13B_KAN582-5_5.tif:0015-0687	3.77	867.828	53	3830	104.686	110.8	0.587	3271.91	125835	2.703	0.37	0.782	1.47951
970	ARL13B_KAN582-5_5.tif:0016-0708	4.602	368.944	150	690	32.579	114.267	0.435	1697.98	65303	4.384	0.228	0.781	0.767805
971	ARL13B_KAN582-5_5.tif:0017-0835	2.782	261.262	101	522	139.022	134.632	0.552	726.874	27955	1.898	0.527	0.74	0.328683
972	ARL13B_KAN582-5_5.tif:0018-0837	2.548	418.714	142	1270	85.196	135.068	0.587	1066.95	41034	3.248	0.308	0.891	0.48246
973	ARL13B_KAN582-5_5.tif:0019-0845	3.562	766.146	62	2468	196.453	136.153	0.355	2729.18	104962	4.677	0.214	0.663	1.2341
974	ARL13B_KAN582-5_5.tif:0020-0963	2.288	581.034	49	2195	190.876	155.407	0.527	1329.49	51131	3.658	0.273	0.819	0.601176
975	ARL13B_KAN582-5_5.tif:0021-1005	3.562	312.533	72	828	94.843	162.202	0.339	1113.31	42817	5.577	0.179	0.648	0.503424
976	ARL13B_KAN582-5_6.tif:0001-0071	2.964	455.956	124	1371	215.755	11.476	0.418	1351.54	51979	4.408	0.227	0.75	0.611147
977	ARL13B_KAN582-5_6.tif:0002-0267	1.586	304.443	108	1135	40.057	43.37	0.326	482.875	18571	5.272	0.19	0.619	0.21835
978	ARL13B_KAN582-5_6.tif:0003-0314	4.004	544.844	100	1887	63.258	50.614	0.493	2181.69	83906	3.357	0.298	0.755	0.986531
979	ARL13B_KAN582-5_6.tif:0004-0363	3.536	918.426	145	2842	210.679	58.504	0.537	3247.75	124906	3.442	0.291	0.8	1.46859
980	ARL13B_KAN582-5_6.tif:0005-0405	4.29	377.388	21	1181	140.738	65.661	0.402	1619.09	62269	4.402	0.227	0.815	0.732132
981	ARL13B_KAN582-5_6.tif:0006-0507	4.264	805.268	150	2424	70.801	81.794	0.51	3433.87	132064	3.756	0.266	0.839	1.55275
982	ARL13B_KAN582-5_6.tif:0007-0548	3.796	697.507	153	2102	144.072	88.599	0.354	2647.89	101836	4.369	0.229	0.631	1.19734
983	ARL13B_KAN582-5_6.tif:0008-0544	2.21	434.306	94	980	98.371	87.349	0.536	959.874	36916	2.012	0.497	0.78	0.434042
984	ARL13B_KAN582-5_6.tif:0009-0600	3.718	841.587	152	1981	217.578	96.683	0.569	3129.21	120347	3.266	0.306	0.834	1.41499
985	ARL13B_KAN582-5_6.tif:0010-0659	3.042	438.889	49	1051	7.805	106.528	0.574	1335.18	51350	3.158	0.317	0.876	0.603751
986	ARL13B_KAN582-5_6.tif:0011-0667	4.03	840.219	151	3049	189.066	107.718	0.398	3386.29	130234	4.934	0.203	0.829	1.53124
987	ARL13B_KAN582-5_6.tif:0012-0678	3.848	626.858	32	2141	122.4	109.301	0.587	2412.3	92775	2.574	0.388	0.809	1.09081
988	ARL13B_KAN582-5_6.tif:0013-0807	1.872	241.931	150	439	2.956	130.129	0.406	452.921	17419	4.51	0.222	0.709	0.204805
989	ARL13B_KAN582-5_6.tif:0014-0813	2.886	718.351	151	2356	111.218	131.027	0.481	2073.29	79737	3.736	0.268	0.782	0.937513
990	ARL13B_KAN582-5_6.tif:0015-0814	2.574	757.677	118	2096	192.383	131.213	0.581	1950.38	75010	2.937	0.34	0.798	0.881935
991	ARL13B_KAN582-5_6.tif:0016-0848	3.926	714.437	61	2298	164.792	136.59	0.408	2805.05	107880	4.647	0.215	0.704	1.26841
992	ARL13B_KAN582-5_6.tif:0017-0849	1.404	167.407	48	277	156.792	136.886	0.529	235.054	9040	1.924	0.52	0.671	0.106288
993	ARL13B_KAN582-5_6.tif:0018-0901	3.38	681.692	150	2066	209.294	145.359	0.41	2304.26	88620	4.329	0.231	0.726	1.04196
994	ARL13B_KAN582-5_6.tif:0019-0977	3.094	482.37	104	1288	52.461	157.877	0.381	1492.54	57402	4.808	0.208	0.686	0.674908
995	ARL13B_KAN582-5_6.tif:0020-1028	2.6	653.19	156	1416	139.275	166.05	0.383	1698.4	65319	4.682	0.214	0.735	0.767993
										69764.9				0.820266
996	ARL13B_KAN582-6_1.tif:0001-0045	2.938	647.743	91	2053	177.944	7.146	0.515	1903.18	73195	3.664	0.273	0.782	0.860595
997	ARL13B_KAN582-6_1.tif:0002-0054	2.652	530.098	99	1605	20.578	9.055	0.561	1405.9	54070	1.99	0.502	0.729	0.635732
998	ARL13B_KAN582-6_1.tif:0003-0158	3.64	680.007	71	2174	183.088	25.489	0.462	2475.38	95201	4.279	0.234	0.807	1.11933
999	ARL13B_KAN582-6_1.tif:0004-0165	2.444	643.489	118	1667	206.337	26.562	0.424	1572.78	60488	4.098	0.244	0.729	0.711192
1000	ARL13B_KAN582-6_1.tif:0005-0250	2.002	339.545	71	997	61.841	40.205	0.475	679.811	26145	3.662	0.273	0.691	0.307402
1001	ARL13B_KAN582-6_1.tif:0006-0358	3.978	1039.57	25	3986	148.634	58.065	0.405	4135.65	159054	3.769	0.265	0.745	1.87009
1002	ARL13B_KAN582-6_1.tif:0007-0460	3.848	478.831	152	1479	28.315	74.521	0.437	1842.65	70867	4.021	0.249	0.771	0.833224
1003	ARL13B_KAN582-6_1.tif:0008-0479	2.47	240.158	60	527	173.983	77.401	0.472	593.226	22815	2.076	0.482	0.66	0.268249
1004	ARL13B_KAN582-6_1.tif:0009-0477	2.834	687.725	123	2636	45.025	76.89	0.6	1949.13	74962	3.143	0.318	0.858	0.881371
1005	ARL13B_KAN582-6_1.tif:0010-0588	3.068	456.797	105	1292	17.311	94.777	0.383	1401.54	53902	4.784	0.209	0.711	0.633757
1006	ARL13B_KAN582-6_1.tif:0011-0654	3.016	437.759	82	1339	94.666	105.357	0.499	1320.36	50780	3.163	0.316	0.814	0.597049
1007	ARL13B_KAN582-6_1.tif:0012-0681	3.146	507.083	52	1882	121.815	109.937	0.43	1595.38	61357	4.435	0.225	0.747	0.721409
1008	ARL13B_KAN582-6_1.tif:0013-0685	1.456	217.5	111	410	74.65	110.528	0.389	316.699	12180	3.917	0.255	0.619	0.143207
1009	ARL13B_KAN582-6_1.tif:0014-0704	2.886	640.135	150	2108	162.719	113.49	0.592	1847.54	71055	2.984	0.335	0.819	0.835434
1010	ARL13B_KAN582-6_1.tif:0015-0795	3.094	762.622	125	2310	205.833	128.38	0.406	2359.69	90752	5.18	0.193	0.735	1.06702
1011	ARL13B_KAN582-6_1.tif:0016-0853	2.054	695.101	65	1945	47.037	137.682	0.488	1427.82	54913	2.667	0.375	0.699	0.645644
1012	ARL13B_KAN582-6_1.tif:0017-0876	3.978	728.242	30	2551	128.844	141.344	0.566	2897.12	111421	2.984	0.335	0.816	1.31004
1013	ARL13B_KAN582-6_1.tif:0018-0881	1.144	154.455	47	235	82.139	142.036	0.527	176.707	6796	1.059	0.944	0.667	0.0799045
1014	ARL13B_KAN582-6_1.tif:0019-0944	2.756	606.094	100	1702	215.765	152.18	0.436	1670.5	64246	4.506	0.222	0.739	0.755377
1015	ARL13B_KAN582-6_1.tif:0020-1020	2.6	395.15	99	1104	174.077	164.485	0.354	1027.45	39515	4.931	0.203	0.627	0.4646
1016	ARL13B_KAN582-6_1.tif:0021-1031	2.652	783.569	35	2202	130.465	166.176	0.5	2078.15	79924	3.648	0.274	0.826	0.939712
1017	ARL13B_KAN582-6_2.tif:0001-0087	3.614	873.683	124	3095	40.354	14.026	0.57	3157.68	121442	3.057	0.327	0.797	1.42786
1018	ARL13B_KAN582-6_2.tif:0002-0122	1.924	273.432	87	472	157.371	19.742	0.5	526.116	20234	3.097	0.323	0.705	0.237903
1019	ARL13B_KAN582-6_2.tif:0003-0126	2.262	459.069	69	1705	172.859	20.38	0.49	1038.48	39939	3.816	0.262	0.795	0.469586
1020	ARL13B_KAN582-6_2.tif:0004-0146	2.548	299.112	22	722	70.502	23.462	0.394	762.184	29313	4.794	0.209	0.74	0.34465
1021	ARL13B_KAN582-6_2.tif:0005-0235	4.16	754.3	51	3014	99.392	37.655	0.51	3138.08	120688	2.88	0.347	0.734	1.419
1022	ARL13B_KAN582-6_2.tif:0006-0243	3.094	502.294	27	1756	181.816	39.163	0.486	1554.19	59773	3.219	0.311	0.732	0.702785
1023	ARL13B_KAN582-6_2.tif:0007-0254	3.146	474.19	142	1921	168.791	40.937	0.357	1491.89	57377	5.643	0.177	0.699	0.674614
1024	ARL13B_KAN582-6_2.tif:0008-0337	3.432	582.455	17	1608	131.591	54.07	0.449	1999.1	76884	2.638	0.379	0.642	0.903969
1025	ARL13B_KAN582-6_2.tif:0009-0374	2.236	653.302	131	2244	196.997	60.458	0.48	1460.87	56184	4.028	0.248	0.768	0.660587
1026	ARL13B_KAN582-6_2.tif:0010-0395	2.34	277.267	47	674	11.298	63.611	0.318	648.843	24954	4.408	0.227	0.588	0.293398
1027	ARL13B_KAN582-6_2.tif:0011-0437	3.094	648.664	151	2836	108.751	70.293	0.424	2007.09	77191	4.299	0.233	0.76	0.907579
1028	ARL13B_KAN582-6_2.tif:0012-0450	2.756	638.755	110	1624	12.349	72.671	0.585	1760.51	67708	2.73	0.366	0.828	0.796082
1029	ARL13B_KAN582-6_2.tif:0013-0497	2.418	339.882	115	1051	57.971	80.04	0.338	821.883	31609	4.717	0.212	0.641	0.371645
1030	ARL13B_KAN582-6_2.tif:0014-0526	4.836	509.086	86	1950	125.991	85.025	0.404	2462.09	94690	3.907	0.256	0.651	1.11332
1031	ARL13B_KAN582-6_2.tif:0015-0540	3.9	521.093	55	1933	72.06	86.989	0.396	2032.39	78164	3.433	0.291	0.668	0.919019
1032	ARL13B_KAN582-6_2.tif:0016-0558	3.354	869.457	58	2785	196.563	89.746	0.4	2916.34	112160	4.628	0.216	0.766	1.31873
1033	ARL13B_KAN582-6_2.tif:0017-0682	3.016	384.793	115	1283	85.963	110.011	0.521	1160.61	44636	3.507	0.285	0.781	0.524811
1034	ARL13B_KAN582-6_2.tif:0018-0737	4.784	353.092	58	957	169.489	118.74	0.479	1689.3	64969	2.997	0.334	0.694	0.763878
1035	ARL13B_KAN582-6_2.tif:0019-0784	3.172	733.025	42	2318	93.787	126.47	0.579	2325.29	89429	2.811	0.356	0.797	1.05147
1036	ARL13B_KAN582-6_2.tif:0020-0798	3.718	811.392	77	2697	164.743	128.553	0.422	3016.94	116029	4.168	0.24	0.711	1.36422
1037	ARL13B_KAN582-6_2.tif:0021-0872	3.068	302.754	49	1149	133.687	141.008	0.314	928.906	35725	4.929	0.203	0.607	0.420039
1038	ARL13B_KAN582-6_2.tif:0022-0883	3.614	1185.93	151	3464	211.76	142.396	0.482	4286.23	164845	4.009	0.249	0.82	1.93818
1039	ARL13B_KAN582-6_2.tif:0023-0902	3.068	378.856	97	1035	25.833	145.199	0.428	1162.4	44705	2.895	0.345	0.682	0.525622
1040	ARL13B_KAN582-6_2.tif:0024-0913	2.6	526.53	88	1485	6.14	147.123	0.454	1369.06	52653	4.098	0.244	0.787	0.619071
1041	ARL13B_KAN582-6_2.tif:0025-0976	0.832	173.938	108	293	42.646	157.637	0.479	144.725	5566	2.797	0.357	0.688	0.0654426
1042	ARL13B_KAN582-6_3.tif:0001-0016	3.276	419.198	129	1489	191.301	2.563	0.504	1373.38	52819	4.004	0.25	0.826	0.621023
1043	ARL13B_KAN582-6_3.tif:0002-0090	4.498	335.116	126	862	43.242	14.36	0.197	1507.44	57975	11.209	0.089	0.672	0.681645
1044	ARL13B_KAN582-6_3.tif:0003-0082	3.276	402.143	63	1201	35.41	13.295	0.439	1317.5	50670	4.687	0.213	0.805	0.595756
1045	ARL13B_KAN582-6_3.tif:0004-0086	2.808	565.602	90	1725	101.234	13.69	0.338	1588.31	61085	4.844	0.206	0.602	0.718211
1046	ARL13B_KAN582-6_3.tif:0005-0184	2.288	921.148	85	3604	74.716	29.802	0.579	2107.71	81061	2.486	0.402	0.759	0.95308
1047	ARL13B_KAN582-6_3.tif:0006-0232	4.004	786.383	40	3022	155.903	37.513	0.543	3148.87	121103	3.092	0.323	0.819	1.42388
1048	ARL13B_KAN582-6_3.tif:0007-0259	3.666	827.823	102	2633	136.408	41.802	0.53	3034.98	116723	3.848	0.26	0.907	1.37238
1049	ARL13B_KAN582-6_3.tif:0008-0306	4.732	577.769	151	1838	175.99	49.371	0.456	2734.17	105154	4.741	0.211	0.831	1.23636
1050	ARL13B_KAN582-6_3.tif:0009-0339	4.29	668.303	29	1826	100.423	54.941	0.48	2867.19	110270	3.762	0.266	0.769	1.29651
1051	ARL13B_KAN582-6_3.tif:0010-0338	3.406	452.382	116	1189	42.029	54.576	0.493	1540.9	59262	4.074	0.245	0.856	0.696777
1052	ARL13B_KAN582-6_3.tif:0011-0399	3.796	787.671	8	3723	99.463	64.38	0.546	2990.18	115000	2.684	0.373	0.741	1.35212
1053	ARL13B_KAN582-6_3.tif:0012-0438	4.134	429.623	17	1306	152.081	70.778	0.513	1776.17	68310	4.438	0.225	0.909	0.80316
1054	ARL13B_KAN582-6_3.tif:0013-0483	2.964	459.482	137	1149	110.725	78.046	0.422	1361.99	52381	3.326	0.301	0.683	0.615873
1055	ARL13B_KAN582-6_3.tif:0014-0495	3.9	382.213	114	873	61.275	79.597	0.458	1490.72	57332	3.606	0.277	0.752	0.674085
1056	ARL13B_KAN582-6_3.tif:0015-0496	3.692	422.852	0	2039	70.557	80.299	0.58	1561.26	60045	1.201	0.833	0.759	0.705983
1057	ARL13B_KAN582-6_3.tif:0016-0519	3.484	865.843	49	3466	141.882	83.568	0.584	3016.78	116023	2.762	0.362	0.815	1.36415
1058	ARL13B_KAN582-6_3.tif:0017-0542	1.768	363.221	111	974	36.419	87.25	0.374	642.213	24699	4.554	0.22	0.708	0.2904
1059	ARL13B_KAN582-6_3.tif:0018-0557	3.77	515.903	142	1677	196.891	89.929	0.534	1945.07	74806	3.259	0.307	0.812	0.879537
1060	ARL13B_KAN582-6_3.tif:0019-0559	3.198	663.642	35	2596	77.832	90.07	0.538	2122.46	81628	2.808	0.356	0.724	0.959747
1061	ARL13B_KAN582-6_3.tif:0020-0605	3.198	673.618	110	2802	106.69	97.695	0.47	2154.36	82855	3.623	0.276	0.707	0.974174
1062	ARL13B_KAN582-6_3.tif:0021-0676	4.316	557.494	87	2092	59.168	109.337	0.425	2406.29	92544	3.535	0.283	0.663	1.08809
1063	ARL13B_KAN582-6_3.tif:0022-0711	4.784	466.576	77	1084	202.721	114.661	0.424	2232.23	85850	4.004	0.25	0.742	1.00939
1064	ARL13B_KAN582-6_3.tif:0023-0711	2.314	813.236	111	3935	143.31	114.595	0.592	1881.94	72378	3.178	0.315	0.798	0.850989
1065	ARL13B_KAN582-6_3.tif:0024-0742	3.042	944	154	3099	66.397	119.779	0.598	2871.82	110448	3.058	0.327	0.796	1.2986
1066	ARL13B_KAN582-6_3.tif:0025-0742	1.352	302.288	97	669	2.471	119.449	0.356	408.719	15719	3.251	0.308	0.539	0.184817
1067	ARL13B_KAN582-6_3.tif:0026-0857	2.522	598.196	107	1596	69.933	137.933	0.415	1508.74	58025	4.169	0.24	0.716	0.682233
1068	ARL13B_KAN582-6_3.tif:0027-0982	2.184	437.429	125	1283	82.209	158.509	0.438	955.402	36744	3.554	0.281	0.675	0.43202
1069	ARL13B_KAN582-6_3.tif:0028-1009	3.536	269.684	153	489	120.985	162.711	0.278	953.659	36677	7.669	0.13	0.643	0.431232
1070	ARL13B_KAN582-6_3.tif:0029-1029	1.612	247.629	77	534	3.943	165.952	0.453	399.202	15353	3.773	0.265	0.697	0.180514
1071	ARL13B_KAN582-6_4.tif:0001-0007	4.342	408.048	75	1060	125.051	1.221	0.393	1771.85	68144	4.524	0.221	0.72	0.801208
1072	ARL13B_KAN582-6_4.tif:0002-0040	2.288	429.443	152	967	54.259	6.553	0.53	982.625	37791	3.126	0.32	0.772	0.44433
1073	ARL13B_KAN582-6_4.tif:0003-0089	3.874	416.087	121	1995	68.026	14.419	0.375	1612.02	61997	4.365	0.229	0.711	0.728934
1074	ARL13B_KAN582-6_4.tif:0004-0106	4.68	438.939	106	1230	133.732	17.199	0.376	2054.36	79009	3.739	0.267	0.644	0.928954
1075	ARL13B_KAN582-6_4.tif:0005-0149	3.432	524.114	148	1342	149.636	23.953	0.575	1798.87	69183	2.522	0.397	0.774	0.813424
1076	ARL13B_KAN582-6_4.tif:0006-0146	2.73	483.2	137	1595	185.068	23.557	0.429	1319.21	50736	3.61	0.277	0.686	0.596532
1077	ARL13B_KAN582-6_4.tif:0007-0170	2.704	503.673	47	1590	23.8	27.378	0.51	1362.01	52382	3.433	0.291	0.825	0.615885
1078	ARL13B_KAN582-6_4.tif:0008-0239	3.562	746.985	71	2243	121.331	38.708	0.322	2660.92	102337	5.477	0.183	0.651	1.20323
1079	ARL13B_KAN582-6_4.tif:0009-0245	2.418	309.849	83	723	222.708	39.469	0.485	749.261	28816	3.044	0.329	0.667	0.338806
1080	ARL13B_KAN582-6_4.tif:0010-0258	4.888	273.941	95	535	141.309	41.505	0.452	1339.11	51501	4.066	0.246	0.763	0.605527
1081	ARL13B_KAN582-6_4.tif:0011-0264	4.446	459.538	137	1127	30.767	42.584	0.456	2043.23	78581	4.271	0.234	0.799	0.923922
1082	ARL13B_KAN582-6_4.tif:0012-0280	4.29	495.594	130	1668	61.153	45.073	0.48	2126.23	81773	4.205	0.238	0.797	0.961452
1083	ARL13B_KAN582-6_4.tif:0013-0277	3.562	765.606	48	2368	167.995	44.654	0.526	2727.25	104888	4.14	0.242	0.864	1.23323
1084	ARL13B_KAN582-6_4.tif:0014-0322	2.21	399.706	155	1584	73.842	51.918	0.483	883.403	33975	4.481	0.223	0.794	0.399463
1085	ARL13B_KAN582-6_4.tif:0015-0346	2.678	450.718	133	1275	7.409	55.554	0.417	1207.1	46424	2.694	0.371	0.624	0.545833
1086	ARL13B_KAN582-6_4.tif:0016-0395	3.64	504.871	30	1533	186.892	63.636	0.447	1837.84	70682	3.251	0.308	0.659	0.831049
1087	ARL13B_KAN582-6_4.tif:0017-0397	4.368	467	0	1423	137.756	64.112	0.351	2039.98	78456	1.787	0.56	0.551	0.922452
1088	ARL13B_KAN582-6_4.tif:0018-0412	3.926	436.278	153	1146	40.343	66.528	0.429	1712.93	65878	4.539	0.22	0.751	0.774565
1089	ARL13B_KAN582-6_4.tif:0019-0445	2.34	217.089	116	354	165.066	71.762	0.485	508.019	19538	3.815	0.262	0.804	0.229719
1090	ARL13B_KAN582-6_4.tif:0020-0476	3.172	638.041	52	2030	52.874	76.758	0.595	2023.99	77841	2.959	0.338	0.785	0.915221
1091	ARL13B_KAN582-6_4.tif:0021-0541	2.496	428.354	151	1247	4.997	87.117	0.479	1069.24	41122	4.242	0.236	0.73	0.483495
1092	ARL13B_KAN582-6_4.tif:0022-0583	3.198	615.715	117	2034	86.73	93.853	0.529	1969.18	75733	3.074	0.325	0.791	0.890436
1093	ARL13B_KAN582-6_4.tif:0023-0597	2.6	501.79	153	1193	45.135	96.247	0.361	1304.73	50179	5.518	0.181	0.662	0.589983
1094	ARL13B_KAN582-6_4.tif:0024-0617	3.692	696.908	164	1962	180.058	99.398	0.489	2573.14	98961	3.42	0.292	0.768	1.16354
1095	ARL13B_KAN582-6_4.tif:0025-0637	4.966	712.576	4	3023	148.111	102.6	0.471	3538.86	136102	2.956	0.338	0.725	1.60023
1096	ARL13B_KAN582-6_4.tif:0026-0666	4.628	369.107	11	1126	127.083	107.283	0.473	1708.33	65701	3.112	0.321	0.721	0.772484
1097	ARL13B_KAN582-6_4.tif:0027-0688	3.172	439.32	81	1273	222.722	110.935	0.462	1393.61	53597	3.749	0.267	0.748	0.630171
1098	ARL13B_KAN582-6_4.tif:0028-0713	1.3	307.54	175	566	2.277	114.923	0.419	399.826	15377	5.179	0.193	0.833	0.180796
1099	ARL13B_KAN582-6_4.tif:0029-0730	3.146	587.488	150	1682	86.417	117.766	0.513	1848.35	71086	3.378	0.296	0.738	0.835799
1100	ARL13B_KAN582-6_4.tif:0030-0757	5.564	469.514	61	1218	25.319	122.891	0.206	2612.53	100476	2.429	0.412	0.413	1.18135
1101	ARL13B_KAN582-6_4.tif:0031-0761	3.016	491.81	152	989	50.784	122.878	0.507	1483.39	57050	3.859	0.259	0.814	0.670769
1102	ARL13B_KAN582-6_4.tif:0032-0771	2.834	281.367	14	736	56.403	124.508	0.271	797.442	30669	4.168	0.24	0.53	0.360593
1103	ARL13B_KAN582-6_4.tif:0033-0786	2.99	529.722	65	2438	81.391	126.775	0.337	1583.96	60918	5.724	0.175	0.737	0.716248
1104	ARL13B_KAN582-6_4.tif:0034-0787	6.396	545.183	60	2369	171.809	126.763	0.282	3487.2	134115	5.494	0.182	0.644	1.57687
1105	ARL13B_KAN582-6_4.tif:0035-0844	3.25	487.624	128	1353	141.598	136.014	0.4	1584.87	60953	5.028	0.199	0.751	0.716659
1106	ARL13B_KAN582-6_4.tif:0036-0875	1.612	393.532	158	926	9.649	141.19	0.541	634.412	24399	4.087	0.245	0.765	0.286873
1107	ARL13B_KAN582-6_4.tif:0037-0911	3.432	441.295	45	1443	78.163	147.032	0.387	1514.62	58251	5.324	0.188	0.689	0.68489
1108	ARL13B_KAN582-6_4.tif:0038-0912	2.522	439.557	115	1211	89.837	147.058	0.432	1108.63	42637	4.62	0.216	0.735	0.501308
1109	ARL13B_KAN582-6_4.tif:0039-0953	1.56	204.45	90	390	67.475	153.588	0.244	318.961	12267	8.623	0.116	0.732	0.14423
1110	ARL13B_KAN582-6_4.tif:0040-0980	2.782	471.589	129	1378	34.11	158.222	0.337	1312.04	50460	6.805	0.147	0.684	0.593287
1111	ARL13B_KAN582-6_4.tif:0041-0994	3.848	615.189	41	2066	162.888	160.272	0.379	2367.39	91048	5.246	0.191	0.749	1.0705
1112	ARL13B_KAN582-6_4.tif:0042-0991	2.99	517.791	89	1530	213.259	159.728	0.346	1548.29	59546	5.704	0.175	0.663	0.700116
1113	ARL13B_KAN582-6_4.tif:0043-1027	3.302	451.567	115	1268	150.578	165.889	0.396	1491.16	57349	4.316	0.232	0.683	0.674285
1114	ARL13B_KAN582-6_5.tif:0001-0017	2.704	208.413	139	322	33.498	2.726	0.561	563.584	21675	3.066	0.326	0.819	0.254845
1115	ARL13B_KAN582-6_5.tif:0002-0033	2.444	391.691	26	1105	4.132	5.193	0.307	957.352	36819	5.405	0.185	0.684	0.432902
1116	ARL13B_KAN582-6_5.tif:0003-0114	4.342	486.353	120	1089	74.023	18.406	0.587	2111.87	81221	3.295	0.303	0.884	0.954962
1117	ARL13B_KAN582-6_5.tif:0004-0151	0.832	167.844	46	329	81.885	24.56	0.563	139.654	5371	2.027	0.493	0.753	0.0631499
1118	ARL13B_KAN582-6_5.tif:0005-0160	1.924	211.676	94	322	78.568	25.872	0.24	407.289	15664	8.751	0.114	0.676	0.184171
1119	ARL13B_KAN582-6_5.tif:0006-0191	2.99	294.061	117	563	139.89	30.868	0.579	879.295	33817	2.934	0.341	0.799	0.397606
1120	ARL13B_KAN582-6_5.tif:0007-0193	2.34	767.211	150	1951	121.971	31.197	0.547	1795.38	69049	3.319	0.301	0.776	0.811849
1121	ARL13B_KAN582-6_5.tif:0008-0244	3.094	495.084	150	1470	153.534	39.31	0.41	1531.88	58915	4.74	0.211	0.69	0.692697
1122	ARL13B_KAN582-6_5.tif:0009-0250	4.186	542.596	80	2273	46.676	40.376	0.381	2271.45	87358	4.758	0.21	0.722	1.02712
1123	ARL13B_KAN582-6_5.tif:0010-0295	4.55	493.6	71	1339	60.631	47.493	0.45	2246.01	86380	3.864	0.259	0.738	1.01562
1124	ARL13B_KAN582-6_5.tif:0011-0321	2.886	375.135	146	802	19.657	51.782	0.418	1082.7	41640	5.382	0.186	0.813	0.489585
1125	ARL13B_KAN582-6_5.tif:0012-0362	3.328	511.703	72	1617	216.487	58.355	0.416	1703.05	65498	3.3	0.303	0.655	0.770097
1126	ARL13B_KAN582-6_5.tif:0013-0374	1.56	308.1	78	612	181.938	60.45	0.451	480.665	18486	4.357	0.23	0.698	0.21735
1127	ARL13B_KAN582-6_5.tif:0014-0394	3.328	329.242	113	1018	51.097	63.456	0.479	1095.78	42143	3.356	0.298	0.709	0.495499
1128	ARL13B_KAN582-6_5.tif:0015-0449	3.302	404.882	112	1160	59.267	72.595	0.477	1337	51420	4.004	0.25	0.789	0.604574
1129	ARL13B_KAN582-6_5.tif:0016-0456	3.38	379.115	150	898	105.787	73.523	0.551	1281.49	49285	3.258	0.307	0.793	0.579472
1130	ARL13B_KAN582-6_5.tif:0017-0481	2.288	273.898	151	630	184.272	77.636	0.448	626.716	24103	4.036	0.248	0.669	0.283393
1131	ARL13B_KAN582-6_5.tif:0018-0621	3.432	426.053	114	1073	138.938	100.208	0.407	1462.3	56239	4.529	0.221	0.752	0.661234
1132	ARL13B_KAN582-6_5.tif:0019-0634	2.21	382.906	15	989	26.385	102.129	0.421	846.273	32547	4.813	0.208	0.81	0.382674
1133	ARL13B_KAN582-6_5.tif:0020-0639	2.574	301.687	88	977	45.488	103.074	0.29	776.589	29867	4.92	0.203	0.633	0.351163
1134	ARL13B_KAN582-6_5.tif:0021-0640	2.756	345.83	83	896	91.611	103.364	0.372	953.165	36658	4.486	0.223	0.627	0.431009
1135	ARL13B_KAN582-6_5.tif:0022-0643	3.432	824.288	0	3484	163.887	104.166	0.465	2829.13	108806	1.662	0.602	0.68	1.27929
1136	ARL13B_KAN582-6_5.tif:0023-0728	1.612	195.048	76	395	21.764	117.382	0.215	314.437	12093	9.193	0.109	0.743	0.142184
1137	ARL13B_KAN582-6_5.tif:0024-0742	2.288	555.125	38	2028	181.368	119.58	0.516	1270.2	48851	3.008	0.332	0.68	0.574369
1138	ARL13B_KAN582-6_5.tif:0025-0761	4.004	441.961	149	1240	66.566	122.791	0.382	1769.72	68062	5.273	0.19	0.778	0.800244
1139	ARL13B_KAN582-6_5.tif:0026-0762	2.99	603.122	148	2096	132.386	123.051	0.43	1803.44	69359	4.404	0.227	0.78	0.815493
1140	ARL13B_KAN582-6_5.tif:0027-0764	0.312	183	75	286	176.085	123.222	0.597	57.099	2196	2.617	0.382	0.75	0.0258196
1141	ARL13B_KAN582-6_5.tif:0028-0791	0.338	224.769	159	309	3.727	127.443	0.496	75.977	2922	3.284	0.305	0.619	0.0343556
1142	ARL13B_KAN582-6_5.tif:0029-0818	2.548	611.071	161	1968	37.418	131.962	0.549	1557.1	59885	3.126	0.32	0.769	0.704102
1143	ARL13B_KAN582-6_5.tif:0030-0862	4.056	693.712	49	2197	97.933	139.03	0.41	2813.86	108219	5.164	0.194	0.754	1.27239
1144	ARL13B_KAN582-6_5.tif:0031-0882	3.146	568.645	89	1732	41.362	142.231	0.457	1789.06	68806	4.408	0.227	0.804	0.808991
1145	ARL13B_KAN582-6_5.tif:0032-0910	2.34	555.5	42	2105	26.062	146.858	0.462	1299.95	49995	3.645	0.274	0.729	0.58782
1146	ARL13B_KAN582-6_5.tif:0033-0972	2.808	383.602	107	1564	124.149	156.872	0.291	1077.22	41429	7.221	0.138	0.617	0.487104
1147	ARL13B_KAN582-6_5.tif:0034-1025	2.808	276.102	5	707	172.493	165.178	0.327	775.341	29819	5.241	0.191	0.592	0.350599
1148	ARL13B_KAN582-6_5.tif:0035-1029	1.04	243.175	84	533	19.789	165.821	0.385	252.917	9727	5.626	0.178	0.741	0.114366
1149	ARL13B_KAN582-6_6.tif:0001-0030	2.184	364.643	134	907	179.771	4.935	0.466	796.428	30630	4.626	0.216	0.73	0.360134
1150	ARL13B_KAN582-6_6.tif:0002-0048	2.184	610.869	137	1565	52.053	7.851	0.425	1334.22	51313	5.341	0.187	0.734	0.603316
1151	ARL13B_KAN582-6_6.tif:0003-0075	2.86	520.909	41	1672	161.4	12.028	0.303	1489.89	57300	5.363	0.186	0.629	0.673709
1152	ARL13B_KAN582-6_6.tif:0004-0128	1.768	604.338	75	1286	39.226	20.635	0.533	1068.53	41095	3.814	0.262	0.819	0.483177
1153	ARL13B_KAN582-6_6.tif:0005-0152	3.354	512.651	91	1438	87.286	24.556	0.538	1719.54	66132	3.242	0.308	0.782	0.777552
1154	ARL13B_KAN582-6_6.tif:0006-0155	3.146	329.975	23	769	117.143	24.796	0.445	1038.16	39927	3.487	0.287	0.701	0.469445
1155	ARL13B_KAN582-6_6.tif:0007-0236	3.276	592.857	102	1731	143.542	38.243	0.464	1942.32	74700	3.941	0.254	0.875	0.878291
1156	ARL13B_KAN582-6_6.tif:0008-0242	1.274	229.673	11	517	31.982	39.024	0.456	292.622	11254	5.072	0.197	0.845	0.13232
1157	ARL13B_KAN582-6_6.tif:0009-0245	0.442	197.941	3	494	55.664	39.52	0.587	87.495	3365	3.659	0.273	0.829	0.0395642
1158	ARL13B_KAN582-6_6.tif:0010-0294	0.78	130.033	7	216	56.362	47.735	0.182	101.432	3901	7.157	0.14	0.476	0.0458663
1159	ARL13B_KAN582-6_6.tif:0011-0305	2.652	326.431	67	1013	196.254	49.135	0.465	865.748	33296	1.706	0.586	0.648	0.39148
1160	ARL13B_KAN582-6_6.tif:0012-0314	3.718	439.636	24	1586	75.529	50.616	0.207	1634.67	62868	7.363	0.136	0.592	0.739175
1161	ARL13B_KAN582-6_6.tif:0013-0377	3.302	769.26	139	2876	129.704	60.782	0.444	2540.25	97696	4.262	0.235	0.741	1.14867
1162	ARL13B_KAN582-6_6.tif:0014-0416	3.458	474.609	123	1287	91.746	67.238	0.416	1641.3	63123	4.148	0.241	0.767	0.742173
1163	ARL13B_KAN582-6_6.tif:0015-0474	2.756	871.283	90	3236	161.878	76.565	0.527	2401.4	92356	3.488	0.287	0.777	1.08588
1164	ARL13B_KAN582-6_6.tif:0016-0475	3.51	935.867	66	3548	142.796	76.592	0.561	3285.09	126342	3.507	0.285	0.868	1.48548
1165	ARL13B_KAN582-6_6.tif:0017-0525	2.262	337.115	80	783	37.198	84.663	0.325	762.6	29329	5.845	0.171	0.63	0.344838
1166	ARL13B_KAN582-6_6.tif:0018-0566	4.654	756.955	105	2767	82.832	91.411	0.299	3523.08	135495	6.6	0.152	0.669	1.59309
1167	ARL13B_KAN582-6_6.tif:0019-0575	2.574	563.778	60	1459	114.928	92.845	0.492	1451.25	55814	3.645	0.274	0.811	0.656237
1168	ARL13B_KAN582-6_6.tif:0020-0629	3.406	641.687	123	2062	190.165	101.613	0.467	2185.72	84061	3.369	0.297	0.794	0.988353
1169	ARL13B_KAN582-6_6.tif:0021-0650	3.12	375.158	35	1539	45.812	104.693	0.308	1170.56	45019	4.256	0.235	0.565	0.529314
1170	ARL13B_KAN582-6_6.tif:0022-0646	3.874	374.034	55	1344	148.956	104.463	0.455	1449.09	55731	2.132	0.469	0.651	0.655261
1171	ARL13B_KAN582-6_6.tif:0023-0669	2.34	436.733	72	1159	83.476	107.986	0.583	1022.02	39306	2.151	0.465	0.773	0.462143
1172	ARL13B_KAN582-6_6.tif:0024-0690	0.416	151.938	112	198	67.846	111.212	0.468	63.21	2431	3.889	0.257	0.653	0.0285827
1173	ARL13B_KAN582-6_6.tif:0025-0714	3.9	711.76	153	1913	197.183	115.016	0.393	2776.03	106764	5.16	0.194	0.813	1.25529
1174	ARL13B_KAN582-6_6.tif:0026-0726	4.134	472.447	38	1840	119.8	117.027	0.404	1953.21	75119	4.963	0.201	0.729	0.883217
1175	ARL13B_KAN582-6_6.tif:0027-0740	2.496	363.771	107	772	42.54	119.37	0.389	908.027	34922	3.663	0.273	0.625	0.410598
1176	ARL13B_KAN582-6_6.tif:0028-0876	2.678	447.874	56	1008	80.164	141.306	0.542	1199.48	46131	3.038	0.329	0.78	0.542389
1177	ARL13B_KAN582-6_6.tif:0029-0950	1.56	260.017	62	681	41.844	153.351	0.32	405.65	15601	6.027	0.166	0.569	0.18343
1178	ARL13B_KAN582-6_6.tif:0030-0959	2.262	521.736	85	1519	102.172	154.929	0.485	1180.24	45391	3.817	0.262	0.795	0.533688
1179	ARL13B_KAN582-6_6.tif:0031-0987	2.314	560.719	150	1477	150.665	159.151	0.492	1297.58	49904	4.173	0.24	0.828	0.58675
1180	ARL13B_KAN582-6_6.tif:0032-1001	3.25	324.536	73	656	201.825	161.6	0.531	1054.81	40567	3.27	0.306	0.825	0.476969
										60230.2				0.70816
1181	ARL13B_KAN582-7_1.tif:0001-0032	3.406	840.229	78	2360	124.36	5.22	0.439	2861.99	110070	4.756	0.21	0.845	1.29416
1182	ARL13B_KAN582-7_1.tif:0002-0031	0.65	201.6	89	334	175.256	4.957	0.421	131.048	5040	3.18	0.314	0.704	0.0592582
1183	ARL13B_KAN582-7_1.tif:0003-0044	3.874	740.067	37	2350	44.378	7.133	0.337	2867.19	110270	5.689	0.176	0.687	1.29651
1184	ARL13B_KAN582-7_1.tif:0004-0070	1.586	215.984	10	485	111.087	11.395	0.259	342.571	13175	8.373	0.119	0.682	0.154906
1185	ARL13B_KAN582-7_1.tif:0005-0082	3.25	1018	156	2802	139.737	13.306	0.575	3308.7	127250	3.133	0.319	0.833	1.49615
1186	ARL13B_KAN582-7_1.tif:0006-0107	3.172	535.967	31	1795	117.112	17.504	0.523	1700.19	65388	3.858	0.259	0.884	0.768804
1187	ARL13B_KAN582-7_1.tif:0007-0131	2.86	470.027	16	1377	58.694	21.219	0.492	1344.36	51703	2.679	0.373	0.688	0.607902
1188	ARL13B_KAN582-7_1.tif:0008-0148	3.536	692.11	26	2227	94.504	23.599	0.347	2447.45	94127	4.379	0.228	0.675	1.1067
1189	ARL13B_KAN582-7_1.tif:0009-0169	1.066	194.366	18	542	77.693	27.371	0.537	207.206	7969	2.671	0.374	0.745	0.0936961
1190	ARL13B_KAN582-7_1.tif:0010-0219	3.666	1102.31	110	3795	159.179	35.328	0.545	4041.32	155426	3.379	0.296	0.817	1.82743
1191	ARL13B_KAN582-7_1.tif:0011-0343	2.782	390.131	142	982	40.969	55.243	0.589	1085.41	41744	2.689	0.372	0.856	0.490808
1192	ARL13B_KAN582-7_1.tif:0012-0443	3.406	753.695	77	2572	58.36	71.521	0.4	2567.24	98734	4.511	0.222	0.722	1.16087
1193	ARL13B_KAN582-7_1.tif:0013-0454	2.47	611.495	57	1541	102.181	73.437	0.332	1510.48	58092	1.918	0.521	0.515	0.683021
1194	ARL13B_KAN582-7_1.tif:0014-0535	4.446	415.924	150	1058	121.684	86.176	0.573	1849.31	71123	2.743	0.365	0.853	0.836234
1195	ARL13B_KAN582-7_1.tif:0015-0566	2.756	249.283	111	510	3.719	91.598	0.458	687.065	26424	3.077	0.325	0.709	0.310682
1196	ARL13B_KAN582-7_1.tif:0016-0581	2.08	276.275	28	588	186.046	93.61	0.396	574.687	22102	4.807	0.208	0.78	0.259866
1197	ARL13B_KAN582-7_1.tif:0017-0709	2.652	523.569	47	1339	11.033	114.495	0.43	1388.59	53404	4.668	0.214	0.739	0.627901
1198	ARL13B_KAN582-7_1.tif:0018-0797	3.068	549.237	95	1815	126.867	128.332	0.273	1685.16	64810	6.15	0.163	0.577	0.762008
1199	ARL13B_KAN582-7_1.tif:0019-0810	3.068	444.068	63	1036	179.359	130.388	0.364	1362.48	52400	2.777	0.36	0.57	0.616097
1200	ARL13B_KAN582-7_1.tif:0020-0885	3.198	656.61	0	1889	190.864	142.488	0.448	2099.96	80763	2.822	0.354	0.68	0.949577
1201	ARL13B_KAN582-7_1.tif:0021-0988	3.718	373.993	53	849	106.842	159.238	0.474	1390.59	53481	3.312	0.302	0.689	0.628807
1202	ARL13B_KAN582-7_2.tif:0001-0017	2.938	623.248	87	1937	100.584	2.696	0.447	1831.21	70427	4.679	0.214	0.799	0.82805
1203	ARL13B_KAN582-7_2.tif:0002-0052	2.21	673.365	151	1834	42.15	8.483	0.509	1488.23	57236	3.847	0.26	0.78	0.672956
1204	ARL13B_KAN582-7_2.tif:0003-0121	3.016	264.405	20	583	27.846	19.902	0.178	797.494	30671	2.772	0.361	0.382	0.360616
1205	ARL13B_KAN582-7_2.tif:0004-0136	2.028	530.013	93	1231	189.349	21.763	0.442	1074.93	41341	3.141	0.318	0.637	0.48607
1206	ARL13B_KAN582-7_2.tif:0005-0150	3.562	462.511	60	1391	147.15	23.975	0.509	1647.56	63364	3.178	0.315	0.778	0.745007
1207	ARL13B_KAN582-7_2.tif:0006-0190	4.264	661.543	44	2389	51.496	30.543	0.306	2820.99	108493	6.517	0.153	0.735	1.27561
1208	ARL13B_KAN582-7_2.tif:0007-0213	3.562	702.985	113	2188	121.571	34.303	0.359	2504.18	96309	5.304	0.189	0.749	1.13236
1209	ARL13B_KAN582-7_2.tif:0008-0288	4.29	700.921	14	2178	104.15	46.331	0.47	3007.13	115652	4.822	0.207	0.904	1.35979
1210	ARL13B_KAN582-7_2.tif:0009-0301	1.924	355.838	155	778	16.624	48.51	0.583	684.673	26332	3.438	0.291	0.8	0.3096
1211	ARL13B_KAN582-7_2.tif:0010-0303	3.848	1153.25	147	3427	159.606	48.646	0.524	4437.97	170681	3.087	0.324	0.765	2.00679
1212	ARL13B_KAN582-7_2.tif:0011-0337	0.494	178.684	63	343	75.656	54.371	0.498	88.275	3395	3.687	0.271	0.731	0.039917
1213	ARL13B_KAN582-7_2.tif:0012-0353	3.146	809.273	42	2742	134.64	57.264	0.407	2546.12	97922	2.169	0.461	0.596	1.15132
1214	ARL13B_KAN582-7_2.tif:0013-0407	2.548	722.735	95	2281	40.966	65.731	0.569	1841.64	70828	2.709	0.369	0.76	0.832765
1215	ARL13B_KAN582-7_2.tif:0014-0435	3.354	834.14	129	2533	195.956	70.336	0.527	2797.87	107604	3.283	0.305	0.787	1.26516
1216	ARL13B_KAN582-7_2.tif:0015-0473	3.328	864.75	146	2855	167.957	76.522	0.477	2878.06	110688	3.747	0.267	0.788	1.30142
1217	ARL13B_KAN582-7_2.tif:0016-0523	2.99	687.809	152	2290	48.327	84.535	0.385	2056.67	79098	5.289	0.189	0.687	0.93
1218	ARL13B_KAN582-7_2.tif:0017-0567	0.312	168.5	124	212	79.107	91.456	0.539	52.575	2022	1.923	0.52	0.585	0.0237738
1219	ARL13B_KAN582-7_2.tif:0018-0574	2.782	470.271	74	1173	213.294	92.51	0.37	1308.37	50319	4.541	0.22	0.654	0.591629
1220	ARL13B_KAN582-7_2.tif:0019-0602	3.458	951.797	145	3695	151.013	97.032	0.429	3291.51	126589	4.515	0.221	0.76	1.48838
1221	ARL13B_KAN582-7_2.tif:0020-0622	3.666	482.887	146	1039	19.061	100.348	0.507	1770.37	68087	3.662	0.273	0.808	0.800538
1222	ARL13B_KAN582-7_2.tif:0021-0637	3.406	897.015	134	2181	61.29	102.836	0.398	3055.42	117509	5.039	0.198	0.773	1.38162
1223	ARL13B_KAN582-7_2.tif:0022-0764	2.912	936.214	151	2718	162.901	123.322	0.482	2726.42	104856	3.37	0.297	0.749	1.23285
1224	ARL13B_KAN582-7_2.tif:0023-0775	4.134	564.057	102	1513	42.424	124.961	0.37	2331.95	89685	5.29	0.189	0.757	1.05448
1225	ARL13B_KAN582-7_2.tif:0024-0770	4.706	737.856	50	2761	81.941	123.808	0.391	3472.56	133552	3.493	0.286	0.641	1.57025
1226	ARL13B_KAN582-7_2.tif:0025-0810	3.328	868.617	147	2801	93.357	130.585	0.457	2890.93	111183	4.11	0.243	0.749	1.30724
1227	ARL13B_KAN582-7_2.tif:0026-0853	1.17	215.089	114	353	103.736	137.405	0.374	251.669	9679	4.571	0.219	0.625	0.113802
1228	ARL13B_KAN582-7_2.tif:0027-0907	2.574	651.141	150	1820	24.201	146.172	0.429	1676.14	64463	4.291	0.233	0.717	0.757928
1229	ARL13B_KAN582-7_2.tif:0028-0953	3.198	225.528	146	380	153.571	153.707	0.581	721.283	27740	2.427	0.412	0.788	0.326155
1230	ARL13B_KAN582-7_2.tif:0029-0956	2.548	717.837	151	1671	48.489	154.247	0.518	1829.16	70348	3.757	0.266	0.757	0.827122
1231	ARL13B_KAN582-7_2.tif:0030-0989	5.148	405.99	86	1022	42.15	159.772	0.403	2090.16	80386	3.762	0.266	0.658	0.945144
1232	ARL13B_KAN582-7_3.tif:0001-0043	2.574	301.515	118	674	137.602	6.964	0.555	776.147	29850	3.729	0.268	0.792	0.350963
1233	ARL13B_KAN582-7_3.tif:0002-0056	1.898	504.041	160	1083	20.338	9.208	0.388	956.728	36795	5.15	0.194	0.702	0.43262
1234	ARL13B_KAN582-7_3.tif:0003-0068	0.676	232.808	154	400	218.233	10.996	0.399	157.387	6053	4.22	0.237	0.65	0.0711686
1235	ARL13B_KAN582-7_3.tif:0004-0071	2.99	522.539	101	1435	104.042	11.52	0.356	1562.49	60092	5.423	0.184	0.747	0.706536
1236	ARL13B_KAN582-7_3.tif:0005-0086	2.574	840.111	99	2120	56.319	13.994	0.492	2162.58	83171	4.076	0.245	0.805	0.977889
1237	ARL13B_KAN582-7_3.tif:0006-0100	1.69	233.631	59	533	31.539	16.131	0.19	394.86	15186	11.685	0.086	0.691	0.17855
1238	ARL13B_KAN582-7_3.tif:0007-0158	1.976	500.947	153	1238	3.972	25.522	0.439	989.932	38072	4.713	0.212	0.776	0.447634
1239	ARL13B_KAN582-7_3.tif:0008-0216	2.158	231.783	109	419	58.636	34.79	0.59	500.218	19238	1.374	0.728	0.744	0.226192
1240	ARL13B_KAN582-7_3.tif:0009-0230	4.16	926.525	131	2716	183.673	36.821	0.422	3854.58	148244	3.621	0.276	0.674	1.74299
1241	ARL13B_KAN582-7_3.tif:0010-0297	3.458	1133.71	104	3903	86.884	47.98	0.36	3920.62	150784	2.33	0.429	0.582	1.77285
1242	ARL13B_KAN582-7_3.tif:0011-0433	0.884	239.441	137	488	178.651	69.878	0.506	211.679	8141	4.529	0.221	0.932	0.0957184
1243	ARL13B_KAN582-7_3.tif:0012-0447	2.236	485.372	158	1335	6.613	72.092	0.429	1085.36	41742	4.62	0.216	0.691	0.490785
1244	ARL13B_KAN582-7_3.tif:0013-0473	3.094	513.176	76	1323	92.034	76.211	0.228	1587.86	61068	7.8	0.128	0.596	0.718011
1245	ARL13B_KAN582-7_3.tif:0014-0564	4.498	809.295	0	3150	137.823	90.987	0.292	3640.43	140008	4.229	0.236	0.554	1.64615
1246	ARL13B_KAN582-7_3.tif:0015-0577	2.366	660.978	26	3650	70.07	93.218	0.424	1563.97	60149	2.18	0.459	0.621	0.707206
1247	ARL13B_KAN582-7_3.tif:0016-0627	5.356	655.456	108	2241	188.999	101.2	0.382	3510.84	135024	4.219	0.237	0.671	1.58755
1248	ARL13B_KAN582-7_3.tif:0017-0659	3.38	719.715	128	3006	44.832	106.341	0.335	2432.78	93563	6.106	0.164	0.71	1.10007
1249	ARL13B_KAN582-7_3.tif:0018-0718	4.472	454.07	140	1074	117.314	115.622	0.579	2030.72	78100	2.677	0.374	0.849	0.918266
1250	ARL13B_KAN582-7_3.tif:0019-0736	2.808	404.954	28	1645	171.47	118.693	0.29	1137.18	43735	6.952	0.144	0.598	0.514217
1251	ARL13B_KAN582-7_3.tif:0020-0783	2.236	703.651	98	2260	63.831	126.259	0.399	1573.46	60514	4.34	0.23	0.745	0.711498
1252	ARL13B_KAN582-7_3.tif:0021-0833	4.16	205.744	82	389	218.726	134.071	0.404	855.946	32919	3.846	0.26	0.742	0.387047
1253	ARL13B_KAN582-7_3.tif:0022-0851	3.926	782.603	93	2677	113.12	137.623	0.347	3072.68	118173	3.448	0.29	0.606	1.38943
1254	ARL13B_KAN582-7_3.tif:0023-0872	2.938	654.487	93	1764	58.547	140.631	0.38	1923	73957	4.363	0.229	0.72	0.869555
1255	ARL13B_KAN582-7_3.tif:0024-0910	3.666	734.511	62	2412	129.227	146.716	0.392	2692.88	103566	5.071	0.197	0.813	1.21768
1256	ARL13B_KAN582-7_3.tif:0025-0982	4.706	259.044	126	566	130.233	158.293	0.354	1219.13	46887	5.592	0.179	0.769	0.551277
1257	ARL13B_KAN582-7_3.tif:0026-1002	0.364	150.857	41	218	70.017	161.573	0.472	54.915	2112	1.174	0.852	0.583	0.024832
1258	ARL13B_KAN582-7_3.tif:0027-1015	3.328	276.352	46	564	200.463	163.99	0.188	919.753	35373	8.661	0.115	0.493	0.415901
1259	ARL13B_KAN582-7_4.tif:0001-0014	2.314	285.079	100	533	180.17	2.358	0.395	659.712	25372	3.789	0.264	0.781	0.298313
1260	ARL13B_KAN582-7_4.tif:0002-0107	0.936	181.361	106	295	99.558	17.308	0.498	169.764	6529	2.003	0.499	0.699	0.0767652
1261	ARL13B_KAN582-7_4.tif:0003-0164	2.834	1001.63	112	3241	191.763	26.634	0.566	2838.8	109178	3.143	0.318	0.826	1.28367
1262	ARL13B_KAN582-7_4.tif:0004-0221	3.614	879.223	149	2775	114.289	35.68	0.533	3177.7	122212	3.721	0.269	0.84	1.43692
1263	ARL13B_KAN582-7_4.tif:0005-0337	4.446	960.737	103	3142	145.844	54.197	0.518	4271.69	164286	3.605	0.277	0.809	1.9316
1264	ARL13B_KAN582-7_4.tif:0006-0347	1.508	179.828	66	294	200.562	56.221	0.429	271.196	10430	2.586	0.387	0.663	0.122631
1265	ARL13B_KAN582-7_4.tif:0007-0382	1.144	149.864	30	336	207.91	61.565	0.397	171.454	6594	2.946	0.339	0.595	0.0775294
1266	ARL13B_KAN582-7_4.tif:0008-0402	3.666	592.887	80	1817	208.869	64.929	0.503	2173.65	83597	3.437	0.291	0.758	0.982898
1267	ARL13B_KAN582-7_4.tif:0009-0438	1.378	227.849	94	418	155.918	70.662	0.513	313.995	12076	2.963	0.338	0.697	0.141984
1268	ARL13B_KAN582-7_4.tif:0010-0461	1.17	200.244	106	336	46.044	74.392	0.531	234.3	9011	2.784	0.359	0.726	0.105947
1269	ARL13B_KAN582-7_4.tif:0011-0598	3.588	498.094	105	1224	97.453	96.44	0.426	1787.27	68737	4.533	0.221	0.885	0.80818
1270	ARL13B_KAN582-7_4.tif:0012-0652	4.186	963.217	142	3360	149.507	105.239	0.521	4032.27	155078	3.818	0.262	0.815	1.82334
1271	ARL13B_KAN582-7_4.tif:0013-0682	1.196	224.522	72	463	202.428	109.969	0.26	268.544	10328	5.769	0.173	0.523	0.121432
1272	ARL13B_KAN582-7_4.tif:0014-0678	1.352	230.75	75	493	128.857	109.436	0.323	311.993	11999	5.242	0.191	0.634	0.141079
1273	ARL13B_KAN582-7_4.tif:0015-0763	3.588	714.688	129	2148	30.451	123.232	0.498	2564.46	98627	3.32	0.301	0.732	1.15961
1274	ARL13B_KAN582-7_4.tif:0016-0783	3.848	521.784	116	1379	204.202	126.602	0.308	2007.94	77224	5.514	0.181	0.617	0.907967
1275	ARL13B_KAN582-7_4.tif:0017-0795	2.418	274.215	39	713	49.832	128.72	0.413	663.092	25502	2.749	0.364	0.681	0.299842
1276	ARL13B_KAN582-7_4.tif:0018-0802	0.702	588.963	173	1326	0.738	129.158	0.594	413.477	15902	2.594	0.385	0.885	0.186969
1277	ARL13B_KAN582-7_4.tif:0019-0851	1.014	191.436	94	303	37.933	137.3	0.531	194.128	7466	3.152	0.317	0.757	0.087782
1278	ARL13B_KAN582-7_4.tif:0020-0926	1.118	157.628	37	263	197.046	149.454	0.289	176.239	6778	2.735	0.366	0.478	0.0796928
1279	ARL13B_KAN582-7_4.tif:0021-0965	3.744	210.201	123	330	206.188	155.775	0.591	787.041	30269	2.934	0.341	0.823	0.35589
1280	ARL13B_KAN582-7_4.tif:0022-0988	2.236	256.442	125	577	136.723	159.608	0.298	573.439	22054	5.294	0.189	0.575	0.259301
1281	ARL13B_KAN582-7_5.tif:0001-0033	1.898	292.466	67	735	120.903	5.311	0.439	555.133	21350	3.243	0.308	0.667	0.251024
1282	ARL13B_KAN582-7_5.tif:0002-0058	3.874	613.087	130	1516	45.54	9.41	0.596	2375.24	91350	3.164	0.316	0.882	1.07405
1283	ARL13B_KAN582-7_5.tif:0003-0126	3.77	312.069	105	590	7.674	20.198	0.342	1176.57	45250	2.88	0.347	0.586	0.53203
1284	ARL13B_KAN582-7_5.tif:0004-0206	3.484	709.776	93	2453	185.762	33.059	0.39	2473.01	95110	4.457	0.224	0.73	1.11826
1285	ARL13B_KAN582-7_5.tif:0005-0217	2.834	350.083	150	1259	114.519	35.13	0.334	992.194	38159	4.423	0.226	0.594	0.448657
1286	ARL13B_KAN582-7_5.tif:0006-0285	3.978	594.627	130	1836	217.436	46.183	0.397	2365.57	90978	4.416	0.226	0.737	1.06968
1287	ARL13B_KAN582-7_5.tif:0007-0282	3.484	519.821	151	1155	65.289	45.636	0.586	1811.16	69656	2.796	0.358	0.81	0.818985
1288	ARL13B_KAN582-7_5.tif:0008-0314	3.874	483.678	148	1061	6.492	50.59	0.501	1873.88	72068	3.978	0.251	0.844	0.847345
1289	ARL13B_KAN582-7_5.tif:0009-0318	4.55	536.229	152	1513	177.633	51.807	0.307	2439.99	93840	3.669	0.273	0.562	1.10333
1290	ARL13B_KAN582-7_5.tif:0010-0394	3.744	846.847	151	2673	96.161	63.741	0.588	3170.79	121946	3.135	0.319	0.84	1.43379
1291	ARL13B_KAN582-7_5.tif:0011-0400	0.988	249.895	78	455	202.483	64.228	0.547	246.911	9496	1.434	0.697	0.738	0.11165
1292	ARL13B_KAN582-7_5.tif:0012-0421	3.614	630.547	143	2167	175.883	67.932	0.488	2278.93	87646	4.1	0.244	0.82	1.0305
1293	ARL13B_KAN582-7_5.tif:0013-0432	4.654	631.285	64	2172	135.453	70.024	0.441	2938.18	113000	3.327	0.301	0.703	1.32861
1294	ARL13B_KAN582-7_5.tif:0014-0471	2.782	746.888	92	2715	63.019	76.194	0.411	2077.97	79917	4.008	0.25	0.716	0.93963
1295	ARL13B_KAN582-7_5.tif:0015-0586	2.028	725.538	45	1975	118.267	94.565	0.498	1471.48	56592	3.815	0.262	0.8	0.665384
1296	ARL13B_KAN582-7_5.tif:0016-0622	5.824	400.625	149	849	48.088	100.085	0.313	2333.38	89740	4.959	0.202	0.63	1.05512
1297	ARL13B_KAN582-7_5.tif:0017-0620	4.394	554.734	23	2287	70.741	100.072	0.537	2437.65	93750	3.301	0.303	0.765	1.10227
1298	ARL13B_KAN582-7_5.tif:0018-0699	4.472	722.39	152	2212	103.46	112.724	0.495	3230.72	124251	3.856	0.259	0.827	1.46089
1299	ARL13B_KAN582-7_5.tif:0019-0699	2.418	364.301	32	906	210.143	112.456	0.458	880.933	33880	3.366	0.297	0.71	0.398347
1300	ARL13B_KAN582-7_5.tif:0020-0726	3.77	882.683	137	3007	136.083	116.856	0.42	3327.91	127989	4.261	0.235	0.755	1.50484
1301	ARL13B_KAN582-7_5.tif:0021-0728	4.29	490.655	86	1418	33.985	117.545	0.487	2105.03	80958	3.63	0.276	0.74	0.951869
1302	ARL13B_KAN582-7_5.tif:0022-0788	3.64	1247.56	81	4992	138.85	127.268	0.435	4541.38	174658	3.941	0.254	0.72	2.05355
1303	ARL13B_KAN582-7_5.tif:0023-0871	4.706	501.011	0	2135	155.022	140.62	0.273	2357.9	90683	6.409	0.156	0.6	1.06621
1304	ARL13B_KAN582-7_5.tif:0024-0881	3.25	748.44	71	2208	98.5	141.975	0.396	2432.58	93555	4.041	0.247	0.678	1.09998
1305	ARL13B_KAN582-7_5.tif:0025-0902	3.666	630.957	156	1686	77.42	145.586	0.541	2313.23	88965	3.699	0.27	0.879	1.04601
1306	ARL13B_KAN582-7_5.tif:0026-0899	4.316	579.946	43	1738	168.313	144.873	0.471	2503.2	96271	3.333	0.3	0.76	1.13191
1307	ARL13B_KAN582-7_5.tif:0027-0909	3.588	853.928	117	2317	206.794	146.6	0.373	3064.08	117842	5.422	0.184	0.748	1.38554
1308	ARL13B_KAN582-7_5.tif:0028-0916	4.576	644.216	99	1553	51.659	147.767	0.478	2948.11	113382	4.106	0.244	0.83	1.3331
1309	ARL13B_KAN582-7_5.tif:0029-1012	2.392	325.565	154	704	32.872	163.145	0.394	778.799	29952	5.527	0.181	0.767	0.352163
1310	ARL13B_KAN582-7_6.tif:0001-0013	4.55	944.114	50	2617	101.801	2.149	0.428	4295.98	165220	4.796	0.209	0.814	1.94259
1311	ARL13B_KAN582-7_6.tif:0002-0054	0.91	189.2	85	311	101.825	8.889	0.495	172.182	6622	2.429	0.412	0.631	0.0778586
1312	ARL13B_KAN582-7_6.tif:0003-0075	3.172	529.221	140	1369	59.122	12.17	0.349	1678.79	64565	5.318	0.188	0.716	0.759128
1313	ARL13B_KAN582-7_6.tif:0004-0102	1.95	250.973	136	591	201.516	16.025	0.201	489.427	18823	7.646	0.131	0.521	0.221313
1314	ARL13B_KAN582-7_6.tif:0005-0120	2.444	406.468	151	786	17.365	19.424	0.326	993.468	38208	6.111	0.164	0.684	0.449233
1315	ARL13B_KAN582-7_6.tif:0006-0173	3.146	984.182	18	2809	90.459	27.588	0.372	3096.42	119086	4.465	0.224	0.738	1.40016
1316	ARL13B_KAN582-7_6.tif:0007-0190	1.482	202.614	66	384	169.569	30.415	0.263	300.292	11549	7.059	0.142	0.722	0.135788
1317	ARL13B_KAN582-7_6.tif:0008-0217	3.536	669.956	140	2706	102.167	35.011	0.407	2369.11	91114	4.831	0.207	0.779	1.07128
1318	ARL13B_KAN582-7_6.tif:0009-0297	3.354	1009.42	152	3746	109.697	48.019	0.52	3385.79	130215	3.335	0.3	0.768	1.53101
1319	ARL13B_KAN582-7_6.tif:0010-0308	3.276	543.865	51	1662	220.648	49.6	0.404	1781.81	68527	5.261	0.19	0.733	0.805711
1320	ARL13B_KAN582-7_6.tif:0011-0382	3.666	677.837	96	2222	82.969	61.7	0.363	2485.1	95575	5.468	0.183	0.754	1.12373
1321	ARL13B_KAN582-7_6.tif:0012-0443	3.666	825.766	90	3739	171.399	71.367	0.353	3027.44	116433	3.981	0.251	0.667	1.36897
1322	ARL13B_KAN582-7_6.tif:0013-0495	4.836	641.129	22	2407	53.496	79.589	0.336	3100.69	119250	5.295	0.189	0.637	1.40209
1323	ARL13B_KAN582-7_6.tif:0014-0618	2.912	650.241	69	1642	69.261	99.671	0.424	1893.62	72827	4.145	0.241	0.754	0.856269
1324	ARL13B_KAN582-7_6.tif:0015-0654	2.912	1179.71	152	3578	89.066	105.495	0.515	3435.53	132128	2.498	0.4	0.752	1.5535
1325	ARL13B_KAN582-7_6.tif:0016-0661	2.782	234.112	116	385	217.794	106.789	0.477	651.339	25050	3.307	0.302	0.709	0.294527
1326	ARL13B_KAN582-7_6.tif:0017-0806	3.718	721.818	49	2190	159.405	129.874	0.312	2683.88	103220	6.271	0.159	0.692	1.21362
1327	ARL13B_KAN582-7_6.tif:0018-0837	2.6	479.45	145	1407	203.773	134.919	0.351	1246.64	47945	5.727	0.175	0.664	0.563717
1328	ARL13B_KAN582-7_6.tif:0019-0913	2.6	612.34	159	1311	3.762	147.444	0.436	1592.18	61234	4.485	0.223	0.746	0.719963
1329	ARL13B_KAN582-7_6.tif:0020-0925	0.988	194.237	83	331	108.411	149.177	0.462	191.918	7381	2.525	0.396	0.633	0.0867826
1330	ARL13B_KAN582-7_6.tif:0021-0947	1.612	491.032	157	1286	128.573	152.68	0.507	791.592	30444	3.714	0.269	0.78	0.357947
1331	ARL13B_KAN582-7_6.tif:0022-1009	3.094	523.126	134	1375	80.868	162.774	0.307	1618.65	62252	5.997	0.167	0.645	0.731932
										69547.2				0.817706
1332	ARL13B_KAN582-8_1.tif:0001-0073	3.952	611.257	76	1727	60.664	11.68	0.486	2415.83	92911	3.69	0.271	0.738	1.09241
1333	ARL13B_KAN582-8_1.tif:0002-0083	2.652	713.255	151	2042	215.204	13.409	0.456	1891.67	72752	3.99	0.251	0.813	0.855387
1334	ARL13B_KAN582-8_1.tif:0003-0107	1.872	363.944	79	752	147.172	17.361	0.346	681.345	26204	4.645	0.215	0.621	0.308095
1335	ARL13B_KAN582-8_1.tif:0004-0141	2.444	270.149	19	633	12.385	22.91	0.271	660.284	25394	6.787	0.147	0.709	0.298572
1336	ARL13B_KAN582-8_1.tif:0005-0198	2.652	457.01	41	1452	74.292	31.904	0.577	1212.06	46615	2.699	0.371	0.794	0.548079
1337	ARL13B_KAN582-8_1.tif:0006-0211	1.066	222.366	143	362	221.799	33.92	0.384	237.056	9117	4.35	0.23	0.612	0.107194
1338	ARL13B_KAN582-8_1.tif:0007-0214	1.95	320.16	83	774	87.968	34.601	0.321	624.35	24012	5.388	0.186	0.573	0.282323
1339	ARL13B_KAN582-8_1.tif:0008-0217	3.198	842.301	68	1915	144.138	34.926	0.472	2693.84	103603	4.617	0.217	0.799	1.21812
1340	ARL13B_KAN582-8_1.tif:0009-0321	2.366	551.165	29	1817	54.3	51.884	0.513	1304.13	50156	3.174	0.315	0.778	0.589713
1341	ARL13B_KAN582-8_1.tif:0010-0351	2.158	357.506	102	896	89.401	56.58	0.452	771.544	29673	3.561	0.281	0.692	0.348882
1342	ARL13B_KAN582-8_1.tif:0011-0378	3.458	394.105	75	1024	190.353	60.896	0.261	1362.9	52416	6.096	0.164	0.58	0.616285
1343	ARL13B_KAN582-8_1.tif:0012-0404	1.924	618.541	126	1749	188.418	65.186	0.518	1190.14	45772	3.402	0.294	0.787	0.538168
1344	ARL13B_KAN582-8_1.tif:0013-0435	3.172	570.877	104	1602	185.846	70.246	0.45	1810.93	69647	4.614	0.217	0.808	0.81888
1345	ARL13B_KAN582-8_1.tif:0014-0588	3.25	352.936	121	937	170.909	94.706	0.373	1147.11	44117	5.204	0.192	0.733	0.518709
1346	ARL13B_KAN582-8_1.tif:0015-0610	2.418	536.097	123	2012	188.317	98.362	0.433	1296.36	49857	4.174	0.24	0.715	0.586197
1347	ARL13B_KAN582-8_1.tif:0016-0642	0.754	253.897	123	629	85.588	103.72	0.472	191.45	7363	2.671	0.374	0.617	0.086571
1348	ARL13B_KAN582-8_1.tif:0017-0690	2.08	305.4	145	595	9.643	111.216	0.35	635.27	24432	5.127	0.195	0.643	0.287261
1349	ARL13B_KAN582-8_1.tif:0018-0740	2.626	375.535	62	815	77.564	119.134	0.466	986.213	37929	3.474	0.288	0.754	0.445953
1350	ARL13B_KAN582-8_1.tif:0019-0778	2.522	412.072	150	1259	154.025	125.335	0.368	1039.31	39971	5.689	0.176	0.779	0.469962
1351	ARL13B_KAN582-8_1.tif:0020-0792	0.754	350.483	101	750	35.289	127.635	0.424	264.28	10164	3.342	0.299	0.734	0.119504
1352	ARL13B_KAN582-8_1.tif:0021-0801	0.988	206.842	110	359	213.194	129.157	0.347	204.372	7860	4.734	0.211	0.585	0.0924145
1353	ARL13B_KAN582-8_1.tif:0022-0903	2.314	446.809	51	1130	125.135	145.827	0.447	1033.98	39766	3.594	0.278	0.733	0.467552
1354	ARL13B_KAN582-8_1.tif:0023-0927	2.132	369.146	101	733	221.528	149.341	0.479	787.067	30270	3.804	0.263	0.837	0.355902
1355	ARL13B_KAN582-8_1.tif:0024-0941	1.43	395.945	171	1021	199.488	151.793	0.364	566.236	21777	5.9	0.169	0.675	0.256045
1356	ARL13B_KAN582-8_1.tif:0025-1020	2.106	411.728	55	960	2.483	164.404	0.399	867.152	33350	3.629	0.276	0.669	0.392115
1357	ARL13B_KAN582-8_2.tif:0001-0007	2.444	481.84	70	1214	91.127	1.17	0.403	1177.69	45293	5.224	0.191	0.862	0.532536
1358	ARL13B_KAN582-8_2.tif:0002-0016	1.95	519.893	71	1266	48.688	2.319	0.382	1013.85	38992	4.265	0.234	0.688	0.458451
1359	ARL13B_KAN582-8_2.tif:0003-0027	0.39	164.467	153	181	24.902	4.51	0.493	64.146	2467	2.719	0.368	0.652	0.0290059
1360	ARL13B_KAN582-8_2.tif:0004-0061	4.108	260.791	103	471	205.692	9.785	0.487	1071.39	41205	4.25	0.235	0.823	0.484471
1361	ARL13B_KAN582-8_2.tif:0005-0108	1.482	414.123	114	860	78.635	17.496	0.415	613.767	23605	5.064	0.197	0.755	0.277537
1362	ARL13B_KAN582-8_2.tif:0006-0181	3.042	587.838	108	2125	60.919	29.43	0.49	1788.31	68777	3.566	0.28	0.716	0.80865
1363	ARL13B_KAN582-8_2.tif:0007-0248	2.21	386.353	119	883	9.272	39.877	0.343	853.891	32840	5.598	0.179	0.669	0.386119
1364	ARL13B_KAN582-8_2.tif:0008-0281	1.17	229.378	153	370	183.347	45.352	0.531	268.388	10322	3.45	0.29	0.769	0.121362
1365	ARL13B_KAN582-8_2.tif:0009-0312	1.95	520.253	81	1657	35.134	50.197	0.51	1014.55	39019	2.46	0.407	0.691	0.458769
1366	ARL13B_KAN582-8_2.tif:0010-0345	2.704	355.087	59	1114	157.499	55.592	0.385	960.212	36929	3.824	0.261	0.605	0.434195
1367	ARL13B_KAN582-8_2.tif:0011-0362	1.69	155.077	98	198	64.948	58.518	0.442	262.096	10080	4.157	0.241	0.812	0.118516
1368	ARL13B_KAN582-8_2.tif:0012-0408	1.664	283.25	100	538	23.742	65.974	0.337	471.356	18128	3.175	0.315	0.538	0.213141
1369	ARL13B_KAN582-8_2.tif:0013-0453	3.172	443.205	0	1228	80.482	73.16	0.307	1405.93	54071	5.62	0.178	0.613	0.635744
1370	ARL13B_KAN582-8_2.tif:0014-0545	2.496	679.604	151	2116	50.246	87.979	0.362	1696.39	65242	5.701	0.175	0.736	0.767087
1371	ARL13B_KAN582-8_2.tif:0015-0575	2.808	479.88	130	1266	77.27	92.874	0.475	1347.58	51827	4.088	0.245	0.797	0.60936
1372	ARL13B_KAN582-8_2.tif:0016-0599	3.016	408.603	61	1060	93.234	96.596	0.395	1232.42	47398	2.25	0.444	0.596	0.557285
1373	ARL13B_KAN582-8_2.tif:0017-0701	2.132	424.939	92	1254	170.709	112.952	0.417	906.025	34845	4.523	0.221	0.719	0.409693
1374	ARL13B_KAN582-8_2.tif:0018-0699	3.406	325.55	13	781	46.937	112.825	0.442	1108.89	42647	3.097	0.323	0.667	0.501425
1375	ARL13B_KAN582-8_2.tif:0019-0786	2.678	341.049	37	757	77.053	126.9	0.389	913.383	35128	4.702	0.213	0.691	0.41302
1376	ARL13B_KAN582-8_2.tif:0020-0795	1.534	286.814	124	696	195.3	128.318	0.512	439.998	16922	2.863	0.349	0.674	0.198962
1377	ARL13B_KAN582-8_2.tif:0021-0857	2.886	597.739	152	1618	95.958	138.419	0.529	1725.18	66349	2.533	0.395	0.705	0.780103
1378	ARL13B_KAN582-8_2.tif:0022-0908	0.754	309.207	105	893	56.29	146.423	0.46	233.156	8967	3.423	0.292	0.659	0.10543
1379	ARL13B_KAN582-8_2.tif:0023-0935	2.704	377.519	55	1067	131.454	150.701	0.436	1020.87	39262	3.671	0.272	0.689	0.461626
1380	ARL13B_KAN582-8_2.tif:0024-0988	2.444	598.489	91	1787	168.801	159.358	0.408	1462.8	56258	4.52	0.221	0.767	0.661457
1381	ARL13B_KAN582-8_2.tif:0025-1013	2.704	354.923	142	670	70.773	163.379	0.58	959.77	36912	3.223	0.31	0.835	0.433995
1382	ARL13B_KAN582-8_2.tif:0026-1020	2.028	291.179	150	595	165.008	164.427	0.542	590.548	22712	3.487	0.287	0.754	0.267038
1383	ARL13B_KAN582-8_2.tif:0027-1025	0.468	136.056	95	181	138.747	165.389	0.416	63.678	2449	1.709	0.585	0.537	0.0287943
1384	ARL13B_KAN582-8_3.tif:0001-0019	2.912	378	64	1097	61.23	2.99	0.33	1100.8	42336	5.333	0.187	0.631	0.497769
1385	ARL13B_KAN582-8_3.tif:0002-0053	2.652	523.392	150	1419	173.94	8.466	0.484	1388.12	53386	4.022	0.249	0.797	0.62769
1386	ARL13B_KAN582-8_3.tif:0003-0057	1.3	339.2	124	777	101.736	9.049	0.409	440.987	16960	3.924	0.255	0.662	0.199408
1387	ARL13B_KAN582-8_3.tif:0004-0070	2.392	338.772	113	760	160.677	11.431	0.223	810.391	31167	8.703	0.115	0.652	0.366448
1388	ARL13B_KAN582-8_3.tif:0005-0133	0.598	124.87	18	209	31.896	21.401	0.451	74.676	2872	2.834	0.353	0.648	0.0337677
1389	ARL13B_KAN582-8_3.tif:0006-0180	3.328	299.883	89	654	166.288	29.159	0.434	998.07	38385	4.368	0.229	0.746	0.451314
1390	ARL13B_KAN582-8_3.tif:0007-0212	2.782	551.103	45	1880	69.787	34.24	0.416	1533.26	58968	4.326	0.231	0.718	0.69332
1391	ARL13B_KAN582-8_3.tif:0008-0212	2.678	486.359	51	1277	19.706	34.504	0.362	1302.55	50095	4.288	0.233	0.689	0.588996
1392	ARL13B_KAN582-8_3.tif:0009-0288	3.38	487.077	60	1415	157.185	46.26	0.345	1646.42	63320	3.578	0.28	0.609	0.744489
1393	ARL13B_KAN582-8_3.tif:0010-0312	2.73	388.981	124	919	191.142	50.598	0.36	1061.98	40843	4.462	0.224	0.654	0.480214
1394	ARL13B_KAN582-8_3.tif:0011-0377	3.718	371.049	141	809	108.411	60.837	0.546	1379.64	53060	3.236	0.309	0.856	0.623857
1395	ARL13B_KAN582-8_3.tif:0012-0416	2.262	392.724	44	1251	69.055	67.283	0.314	888.395	34167	5.491	0.182	0.582	0.401721
1396	ARL13B_KAN582-8_3.tif:0013-0427	2.34	379.289	0	999	21.996	68.693	0.485	887.589	34136	2.102	0.476	0.677	0.401356
1397	ARL13B_KAN582-8_3.tif:0014-0431	1.768	443.897	63	2088	173.218	69.651	0.414	784.857	30185	3.86	0.259	0.633	0.354902
1398	ARL13B_KAN582-8_3.tif:0015-0447	8.711	569.301	0	3191	132.154	71.485	0.289	4958.91	190716	3.132	0.319	0.564	2.24236
1399	ARL13B_KAN582-8_3.tif:0016-0467	0.858	201.182	152	277	29.599	75.301	0.432	172.624	6639	4.295	0.233	0.695	0.0780585
1400	ARL13B_KAN582-8_3.tif:0017-0535	5.564	286.603	122	680	102.21	86.523	0.405	1594.75	61333	4.127	0.242	0.711	0.721127
1401	ARL13B_KAN582-8_3.tif:0018-0589	1.742	321.209	78	765	22.875	94.886	0.354	559.58	21521	4.664	0.214	0.654	0.253035
1402	ARL13B_KAN582-8_3.tif:0019-0607	3.094	506.437	45	1820	208.62	97.745	0.528	1567.01	60266	3.561	0.281	0.81	0.708582
1403	ARL13B_KAN582-8_3.tif:0020-0606	2.704	1061.5	101	4628	121.469	97.823	0.512	2870.47	110396	3.092	0.323	0.727	1.29799
1404	ARL13B_KAN582-8_3.tif:0021-0682	4.55	449.846	85	1089	106.258	110.01	0.448	2046.92	78723	4.366	0.229	0.833	0.925591
1405	ARL13B_KAN582-8_3.tif:0022-0694	3.094	296.244	93	750	197.342	112.086	0.468	916.633	35253	3.166	0.316	0.702	0.41449
1406	ARL13B_KAN582-8_3.tif:0023-0696	3.146	451.281	100	1101	159.973	112.541	0.58	1419.82	54605	2.968	0.337	0.834	0.642022
1407	ARL13B_KAN582-8_3.tif:0024-0706	3.25	512.176	140	1268	121.738	113.937	0.383	1664.67	64022	5.478	0.183	0.779	0.752743
1408	ARL13B_KAN582-8_3.tif:0025-0776	3.094	521.387	115	1790	205.394	125.261	0.494	1613.27	62045	3.886	0.257	0.739	0.729499
1409	ARL13B_KAN582-8_3.tif:0026-0788	3.068	592.449	129	2083	94.252	127.157	0.458	1817.74	69909	3.761	0.266	0.749	0.82196
1410	ARL13B_KAN582-8_3.tif:0027-0851	1.56	388.6	151	856	9.033	137.248	0.42	606.253	23316	5.235	0.191	0.779	0.27414
1411	ARL13B_KAN582-8_3.tif:0028-0861	0.988	261.816	116	507	77.816	138.667	0.498	258.69	9949	1.318	0.759	0.667	0.116976
1412	ARL13B_KAN582-8_3.tif:0029-0885	3.718	473.175	115	1505	114.903	142.799	0.502	1759.37	67664	3.586	0.279	0.747	0.795564
1413	ARL13B_KAN582-8_3.tif:0030-0901	2.366	269.78	46	627	154.413	145.397	0.521	638.338	24550	2.688	0.372	0.737	0.288648
1414	ARL13B_KAN582-8_3.tif:0031-0947	3.302	375.386	100	1159	165.488	152.792	0.443	1239.6	47674	4.104	0.244	0.841	0.56053
1415	ARL13B_KAN582-8_4.tif:0001-0032	2.834	463.275	140	1341	102.77	5.094	0.353	1313	50497	5.505	0.182	0.671	0.593722
1416	ARL13B_KAN582-8_4.tif:0002-0137	2.002	504.909	26	1096	61.561	22.26	0.491	1010.89	38878	3.772	0.265	0.79	0.457111
1417	ARL13B_KAN582-8_4.tif:0003-0159	2.756	390.425	104	1201	190.692	25.946	0.386	1076.08	41385	3.538	0.283	0.658	0.486587
1418	ARL13B_KAN582-8_4.tif:0004-0201	0.65	214.28	124	361	90.851	32.511	0.595	139.29	5357	1.506	0.664	0.694	0.0629853
1419	ARL13B_KAN582-8_4.tif:0005-0308	3.406	647.145	74	2357	118.763	49.812	0.398	2204.31	84776	5.111	0.196	0.744	0.99676
1420	ARL13B_KAN582-8_4.tif:0006-0326	1.534	199.373	103	318	208.192	52.408	0.403	305.856	11763	4.083	0.245	0.67	0.138304
1421	ARL13B_KAN582-8_4.tif:0007-0388	1.482	407.175	40	1902	160.92	62.6	0.578	603.47	23209	2.376	0.421	0.708	0.272881
1422	ARL13B_KAN582-8_4.tif:0008-0478	3.926	435.099	126	1194	67.71	77.02	0.406	1708.3	65700	4.548	0.22	0.693	0.772472
1423	ARL13B_KAN582-8_4.tif:0009-0505	2.652	352.029	67	917	215.877	81.512	0.457	933.638	35907	3.928	0.255	0.826	0.422179
1424	ARL13B_KAN582-8_4.tif:0010-0533	1.586	401.066	91	1058	30.808	85.987	0.389	636.128	24465	4.515	0.221	0.735	0.287649
1425	ARL13B_KAN582-8_4.tif:0011-0625	2.34	230.711	40	670	21.457	101.005	0.366	539.897	20764	4.935	0.203	0.641	0.244134
1426	ARL13B_KAN582-8_4.tif:0012-0634	3.12	271.467	40	734	158.401	102.779	0.318	847.027	32576	4.626	0.216	0.686	0.383015
1427	ARL13B_KAN582-8_4.tif:0013-0676	1.404	462.315	150	1194	197.797	108.996	0.569	649.129	24965	3.51	0.285	0.715	0.293528
1428	ARL13B_KAN582-8_4.tif:0014-0769	4.004	515.266	103	1398	126.972	124.141	0.296	2063.25	79351	7.584	0.132	0.742	0.932975
1429	ARL13B_KAN582-8_4.tif:0015-0755	1.716	225.864	126	386	79.982	121.746	0.342	387.605	14907	5.451	0.183	0.691	0.17527
1430	ARL13B_KAN582-8_4.tif:0016-0794	3.614	348.863	151	779	41.999	127.986	0.544	1260.87	48492	3.631	0.275	0.806	0.570148
1431	ARL13B_KAN582-8_4.tif:0017-0808	3.562	488.796	33	1518	192.671	130.052	0.239	1741.19	66965	8.615	0.116	0.683	0.787346
1432	ARL13B_KAN582-8_4.tif:0018-0793	2.184	213.976	128	354	5.824	127.931	0.346	467.352	17974	5.887	0.17	0.792	0.211331
1433	ARL13B_KAN582-8_4.tif:0019-0893	3.77	515.731	7	1544	123.627	143.643	0.378	1944.42	74781	1.35	0.74	0.618	0.879243
1434	ARL13B_KAN582-8_4.tif:0020-1018	1.612	445.629	77	1659	86.641	164.545	0.402	718.397	27629	2.71	0.369	0.599	0.32485
1435	ARL13B_KAN582-8_5.tif:0001-0032	0.884	209.294	140	351	19.279	5.269	0.253	185.027	7116	5.966	0.168	0.482	0.0836669
1436	ARL13B_KAN582-8_5.tif:0002-0077	0.858	195.03	150	275	28.505	12.433	0.57	167.346	6436	3.483	0.287	0.742	0.0756717
1437	ARL13B_KAN582-8_5.tif:0003-0113	2.288	261.182	90	567	63.628	18.06	0.308	597.62	22984	5.625	0.178	0.593	0.270236
1438	ARL13B_KAN582-8_5.tif:0004-0138	2.236	613.07	130	1931	65.291	22.236	0.459	1370.91	52724	4.136	0.242	0.714	0.619906
1439	ARL13B_KAN582-8_5.tif:0005-0175	2.366	422.758	0	1180	147.204	28.466	0.316	1000.31	38471	3.935	0.254	0.543	0.452326
1440	ARL13B_KAN582-8_5.tif:0006-0216	2.964	457.798	120	1275	211.211	34.877	0.434	1357	52189	4.206	0.238	0.786	0.613616
1441	ARL13B_KAN582-8_5.tif:0007-0216	2.002	471.727	146	1613	111.613	34.879	0.488	944.455	36323	3.12	0.321	0.664	0.42707
1442	ARL13B_KAN582-8_5.tif:0008-0511	2.288	264.523	68	533	36.36	82.441	0.599	605.264	23278	3.257	0.307	0.867	0.273693
1443	ARL13B_KAN582-8_5.tif:0009-0521	1.56	219.733	136	413	71.614	84.065	0.356	342.805	13184	3.469	0.288	0.6	0.155012
1444	ARL13B_KAN582-8_5.tif:0010-0617	2.392	286.413	19	1109	73.22	99.523	0.429	685.141	26350	3.338	0.3	0.605	0.309812
1445	ARL13B_KAN582-8_5.tif:0011-0675	1.976	624.671	155	1479	203.896	108.833	0.579	1234.42	47475	3.102	0.322	0.822	0.558191
1446	ARL13B_KAN582-8_5.tif:0012-0749	2.366	283.703	125	612	170.929	120.726	0.486	671.282	25817	3.645	0.274	0.74	0.303545
1447	ARL13B_KAN582-8_5.tif:0013-0860	1.508	220.828	111	348	53.613	138.681	0.447	333.028	12808	4.263	0.235	0.768	0.150591
1448	ARL13B_KAN582-8_5.tif:0014-0870	2.626	454.752	118	1083	214.364	140.231	0.341	1194.25	45930	5.015	0.199	0.66	0.540025
1449	ARL13B_KAN582-8_5.tif:0015-0967	2.132	214.341	139	362	77.947	155.866	0.534	457.004	17576	3.316	0.302	0.82	0.206651
1450	ARL13B_KAN582-8_5.tif:0016-0981	1.95	577.32	68	1553	211.709	158.024	0.561	1125.84	43299	2.53	0.395	0.862	0.509091
1451	ARL13B_KAN582-8_6.tif:0001-0008	1.04	235.2	150	342	196.592	1.246	0.589	244.623	9408	3.398	0.294	0.777	0.110615
1452	ARL13B_KAN582-8_6.tif:0002-0012	1.43	344.382	153	641	161.741	1.986	0.382	492.496	18941	5.068	0.197	0.655	0.2227
1453	ARL13B_KAN582-8_6.tif:0003-0061	2.366	326.352	98	837	3.143	9.951	0.233	772.194	29698	6.849	0.146	0.613	0.349176
1454	ARL13B_KAN582-8_6.tif:0004-0106	1.898	345.521	114	1022	63.271	17.206	0.269	655.837	25223	5.659	0.177	0.568	0.296561
1455	ARL13B_KAN582-8_6.tif:0005-0134	2.652	349.108	42	1185	107.835	21.72	0.271	925.89	35609	7.171	0.139	0.632	0.418675
1456	ARL13B_KAN582-8_6.tif:0006-0137	1.716	405.545	54	911	37.234	22.162	0.53	695.958	26766	3.606	0.277	0.82	0.314703
1457	ARL13B_KAN582-8_6.tif:0007-0171	1.3	231.7	0	453	32.54	27.77	0.289	301.228	11585	6.212	0.161	0.602	0.136211
1458	ARL13B_KAN582-8_6.tif:0008-0273	3.172	448.992	112	1399	33.548	43.879	0.314	1424.29	54777	5.381	0.186	0.663	0.644044
1459	ARL13B_KAN582-8_6.tif:0009-0290	1.976	312.5	31	1058	206.162	46.771	0.327	617.537	23750	5.744	0.174	0.707	0.279242
1460	ARL13B_KAN582-8_6.tif:0010-0311	1.378	282.811	150	521	51.051	50.214	0.523	389.737	14989	4.189	0.239	0.779	0.176234
1461	ARL13B_KAN582-8_6.tif:0011-0327	1.066	264.146	46	875	52.558	52.636	0.537	281.597	10830	2.722	0.367	0.726	0.127334
1462	ARL13B_KAN582-8_6.tif:0012-0418	3.094	425.538	48	1177	148.004	67.486	0.224	1316.69	50639	7.554	0.132	0.548	0.595392
1463	ARL13B_KAN582-8_6.tif:0013-0417	2.704	422.067	41	1142	119.632	67.356	0.333	1141.34	43895	5.702	0.175	0.684	0.516099
1464	ARL13B_KAN582-8_6.tif:0014-0434	3.588	348.326	5	887	96.937	70.046	0.241	1249.87	48069	7.469	0.134	0.541	0.565175
1465	ARL13B_KAN582-8_6.tif:0015-0436	2.704	239.702	41	410	38.618	70.305	0.361	648.193	24929	3.927	0.255	0.606	0.293104
1466	ARL13B_KAN582-8_6.tif:0016-0453	2.002	414	77	862	64.694	73.003	0.4	828.878	31878	3.73	0.268	0.755	0.374808
1467	ARL13B_KAN582-8_6.tif:0017-0510	3.12	257.675	150	463	32.198	82.082	0.326	803.994	30921	6.496	0.154	0.721	0.363556
1468	ARL13B_KAN582-8_6.tif:0018-0539	2.912	275.589	23	717	65.753	86.966	0.228	802.564	30866	7.427	0.135	0.607	0.362909
1469	ARL13B_KAN582-8_6.tif:0019-0566	2.964	422.263	141	1112	69.203	91.058	0.445	1251.66	48138	3.424	0.292	0.685	0.565986
1470	ARL13B_KAN582-8_6.tif:0020-0582	3.51	350.615	30	959	92.387	93.964	0.307	1230.73	47333	6.56	0.152	0.667	0.556521
1471	ARL13B_KAN582-8_6.tif:0021-0604	2.834	335.532	150	719	196.809	97.527	0.477	950.955	36573	4.174	0.24	0.727	0.43001
1472	ARL13B_KAN582-8_6.tif:0022-0620	4.316	332.367	70	705	129.443	100.149	0.381	1434.58	55173	4.13	0.242	0.728	0.6487
1473	ARL13B_KAN582-8_6.tif:0023-0650	1.664	406.469	104	902	222.001	104.828	0.346	676.405	26014	5.832	0.171	0.674	0.305861
1474	ARL13B_KAN582-8_6.tif:0024-0714	3.25	559.52	55	2155	128.409	115.04	0.487	1818.55	69940	2.701	0.37	0.693	0.822325
1475	ARL13B_KAN582-8_6.tif:0025-0762	2.678	379.573	37	1054	203.663	123.061	0.321	1016.56	39096	6.44	0.155	0.723	0.459674
1476	ARL13B_KAN582-8_6.tif:0026-0838	0.988	762.789	166	1378	223.641	135.34	0.556	753.681	28986	2.8	0.357	0.884	0.340805
1477	ARL13B_KAN582-8_6.tif:0027-0887	2.938	481.664	126	1414	158.535	143.172	0.34	1415.21	54428	5.616	0.178	0.675	0.639941
1478	ARL13B_KAN582-8_6.tif:0028-0880	2.392	281.348	10	817	165.443	142	0.506	673.025	25884	2.985	0.335	0.757	0.304333
1479	ARL13B_KAN582-8_6.tif:0029-0934	0.936	312.806	118	1190	200.64	150.496	0.561	292.804	11261	1.944	0.514	0.661	0.132402
1480	ARL13B_KAN582-8_6.tif:0030-0960	0.936	232.667	143	528	37.665	154.697	0.404	217.789	8376	3.871	0.258	0.686	0.0984814
1481	ARL13B_KAN582-8_6.tif:0031-0974	3.38	354.877	97	915	82.797	157.157	0.587	1199.56	46134	2.765	0.362	0.818	0.542424
										38431				0.451855
1	ARL13B_KAN582-10_1.tif:0001-0104	2.652	503.48	150	1254	182.99	16.949	0.361	1335.31	51355	4.109	0.243	0.583	0.60381
2	ARL13B_KAN582-10_1.tif:0002-0116	2.158	493.916	150	1025	20.585	18.797	0.387	1065.93	40995	5.327	0.188	0.709	0.482002
3	ARL13B_KAN582-10_1.tif:0003-0137	2.236	668.36	0	1850	154.616	22.121	0.473	1494.54	57479	3.805	0.263	0.808	0.675813
4	ARL13B_KAN582-10_1.tif:0004-0176	1.924	394.027	123	1032	173.056	28.352	0.445	758.154	29158	3.862	0.259	0.725	0.342827
5	ARL13B_KAN582-10_1.tif:0005-0214	2.756	751.283	82	2646	61.814	34.38	0.4	2070.66	79636	4.804	0.208	0.729	0.936326
6	ARL13B_KAN582-10_1.tif:0006-0216	2.652	461.373	113	1703	194.645	34.956	0.279	1223.63	47060	5.352	0.187	0.55	0.553311
7	ARL13B_KAN582-10_1.tif:0007-0231	2.314	617.112	154	1686	27.87	37.244	0.376	1428.08	54923	5.583	0.179	0.724	0.645761
8	ARL13B_KAN582-10_1.tif:0008-0265	2.236	356.733	15	932	218.657	43.076	0.473	797.702	30679	2.121	0.471	0.647	0.360711
9	ARL13B_KAN582-10_1.tif:0009-0362	2.626	374.218	83	1087	78.723	58.467	0.367	982.755	37796	5.367	0.186	0.682	0.444389
10	ARL13B_KAN582-10_1.tif:0010-0385	2.08	274.712	75	944	148.88	62.075	0.526	571.436	21977	3.023	0.331	0.744	0.258396
11	ARL13B_KAN582-10_1.tif:0011-0389	1.976	515.053	80	1185	192.738	62.809	0.48	1017.8	39144	3.728	0.268	0.76	0.460238
12	ARL13B_KAN582-10_1.tif:0012-0399	2.834	627.064	89	1812	16.692	64.193	0.416	1777.21	68350	3.011	0.332	0.637	0.80363
13	ARL13B_KAN582-10_1.tif:0013-0417	2.626	593.327	4	1817	107.168	67.049	0.529	1558.17	59926	3.299	0.303	0.811	0.704584
14	ARL13B_KAN582-10_1.tif:0014-0450	2.626	580.525	94	1814	81.889	72.549	0.469	1524.55	58633	4.348	0.23	0.777	0.689382
15	ARL13B_KAN582-10_1.tif:0015-0507	2.132	707.012	151	1589	206.996	81.811	0.537	1507.44	57975	3.813	0.262	0.868	0.681645
16	ARL13B_KAN582-10_1.tif:0016-0567	1.3	391.96	150	803	103.265	91.474	0.477	509.579	19598	4.25	0.235	0.73	0.230425
17	ARL13B_KAN582-10_1.tif:0017-0573	2.678	656.34	95	2211	43.873	92.496	0.387	1757.78	67603	4.928	0.203	0.741	0.794847
18	ARL13B_KAN582-10_1.tif:0018-0592	3.51	886.015	108	2358	181.659	95.671	0.471	3110.1	119612	3.709	0.27	0.761	1.40635
19	ARL13B_KAN582-10_1.tif:0019-0629	2.626	690.891	104	2006	62.671	101.248	0.456	1814.39	69780	3.711	0.269	0.732	0.820443
20	ARL13B_KAN582-10_1.tif:0020-0683	3.614	591.719	33	1869	70.897	110.519	0.263	2138.6	82249	7.098	0.141	0.697	0.967048
21	ARL13B_KAN582-10_1.tif:0021-0697	3.952	544.493	130	1294	172.449	112.488	0.547	2151.97	82763	2.937	0.34	0.822	0.973092
22	ARL13B_KAN582-10_1.tif:0022-0703	3.016	445.078	95	1577	221.475	113.694	0.343	1342.43	51629	4.694	0.213	0.661	0.607032
23	ARL13B_KAN582-10_1.tif:0023-0750	1.69	316.323	91	757	30.815	120.889	0.374	534.618	20561	5.959	0.168	0.756	0.241747
24	ARL13B_KAN582-10_1.tif:0024-0755	3.64	344.693	42	983	95.87	121.714	0.435	1254.76	48257	4.192	0.239	0.727	0.567385
25	ARL13B_KAN582-10_1.tif:0025-0792	3.77	495.248	69	1194	137.936	127.646	0.503	1867.2	71811	2.807	0.356	0.755	0.844323
26	ARL13B_KAN582-10_1.tif:0026-0790	2.574	727.606	114	2106	181.712	127.44	0.504	1872.97	72033	3.433	0.291	0.767	0.846933
27	ARL13B_KAN582-10_1.tif:0027-0872	2.86	726.518	76	2534	195.214	140.688	0.448	2077.97	79917	4.431	0.226	0.803	0.93963
28	ARL13B_KAN582-10_1.tif:0028-0929	3.094	574.067	126	1782	52.452	149.965	0.338	1776.27	68314	4.51	0.222	0.657	0.803207
29	ARL13B_KAN582-10_1.tif:0029-0985	1.17	296.844	126	662	147.596	158.898	0.363	347.329	13358	3.26	0.307	0.536	0.157058
30	ARL13B_KAN582-10_1.tif:0030-0992	1.638	572.095	143	1750	159.67	160.048	0.438	937.148	36042	4.547	0.22	0.746	0.423766
31	ARL13B_KAN582-10_1.tif:0031-1016	3.068	481.314	129	1052	183.139	163.687	0.341	1476.76	56795	5.401	0.185	0.656	0.667771
32	ARL13B_KAN582-10_2.tif:0001-0017	3.172	357.516	44	1118	82.528	3.061	0.259	1134.11	43617	6.128	0.163	0.565	0.51283
33	ARL13B_KAN582-10_2.tif:0002-0026	1.586	457.18	152	947	9.579	4.159	0.408	725.132	27888	5.195	0.193	0.722	0.327895
34	ARL13B_KAN582-10_2.tif:0003-0034	2.236	598.198	150	1494	203.387	5.666	0.525	1337.65	51445	3.037	0.329	0.748	0.604868
35	ARL13B_KAN582-10_2.tif:0004-0086	2.886	360.658	96	744	121.637	13.948	0.584	1040.92	40033	2.812	0.356	0.822	0.470691
36	ARL13B_KAN582-10_2.tif:0005-0217	2.99	553.357	76	1578	122.443	35.15	0.438	1654.64	63636	4.227	0.237	0.796	0.748205
37	ARL13B_KAN582-10_2.tif:0006-0225	4.056	463.686	136	1049	167.153	36.181	0.589	1880.82	72335	3.041	0.329	0.855	0.850484
38	ARL13B_KAN582-10_2.tif:0007-0273	2.73	614.448	113	1854	201.391	44.094	0.398	1677.54	64517	4.635	0.216	0.729	0.758563
39	ARL13B_KAN582-10_2.tif:0008-0280	2.886	809.586	143	3059	89.994	45.286	0.512	2336.61	89864	3.693	0.271	0.74	1.05658
40	ARL13B_KAN582-10_2.tif:0009-0284	3.068	747.822	149	2495	145.203	45.932	0.462	2294.46	88243	4.361	0.229	0.797	1.03752
41	ARL13B_KAN582-10_2.tif:0010-0365	2.704	401.154	115	1294	50.294	58.926	0.595	1084.79	41720	3.076	0.325	0.832	0.490526
42	ARL13B_KAN582-10_2.tif:0011-0422	2.886	741.901	137	2248	202.741	68.127	0.368	2141.26	82351	4.775	0.209	0.733	0.968248
43	ARL13B_KAN582-10_2.tif:0012-0437	1.482	257.825	8	632	3.54	70.618	0.247	382.119	14696	6.202	0.161	0.562	0.172789
44	ARL13B_KAN582-10_2.tif:0013-0448	3.718	739.084	80	2840	130.444	72.151	0.476	2748.08	105689	4.229	0.236	0.794	1.24265
45	ARL13B_KAN582-10_2.tif:0014-0477	2.73	473.362	77	1776	27.009	77.158	0.328	1292.36	49703	6.31	0.158	0.693	0.584387
46	ARL13B_KAN582-10_2.tif:0015-0490	2.782	385.626	99	1226	220.876	78.863	0.329	1072.88	41262	3.45	0.29	0.577	0.485141
47	ARL13B_KAN582-10_2.tif:0016-0518	3.458	771.865	16	2608	155.403	83.591	0.494	2669.27	102658	3.477	0.288	0.721	1.20701
48	ARL13B_KAN582-10_2.tif:0017-0557	1.742	298.582	30	940	62.898	89.964	0.516	520.161	20005	2.824	0.354	0.74	0.23521
49	ARL13B_KAN582-10_2.tif:0018-0701	2.782	574.14	119	1768	62.172	112.995	0.426	1597.35	61433	4.699	0.213	0.723	0.722303
50	ARL13B_KAN582-10_2.tif:0019-0717	3.016	1146.04	82	4422	146.03	115.594	0.484	3456.67	132941	4.183	0.239	0.806	1.56306
51	ARL13B_KAN582-10_2.tif:0020-0782	2.834	903.606	104	2384	33.61	126.251	0.473	2560.97	98493	3.605	0.277	0.845	1.15804
52	ARL13B_KAN582-10_2.tif:0021-0812	2.314	699.663	35	2134	162.954	131.066	0.415	1619.12	62270	2.987	0.335	0.636	0.732144
53	ARL13B_KAN582-10_2.tif:0022-0839	2.756	523.274	89	1198	189.171	135.169	0.424	1442.23	55467	4.144	0.241	0.8	0.652157
54	ARL13B_KAN582-10_2.tif:0023-0858	2.418	634.323	27	1410	207.857	138.293	0.489	1533.88	58992	4.002	0.25	0.791	0.693603
55	ARL13B_KAN582-10_2.tif:0024-0895	2.236	634.849	56	2045	116.156	144.336	0.446	1419.61	54597	4.512	0.222	0.804	0.641928
56	ARL13B_KAN582-10_2.tif:0025-0966	2.028	476.051	124	1249	35.649	155.956	0.405	965.49	37132	4.755	0.21	0.732	0.436582
57	ARL13B_KAN582-10_2.tif:0026-0966	1.56	263.95	119	634	202.828	155.835	0.432	411.787	15837	4.835	0.207	0.784	0.186205
58	ARL13B_KAN582-10_2.tif:0027-0971	2.808	370.833	26	1098	122.247	156.462	0.445	1041.36	40050	4.35	0.23	0.763	0.470891
59	ARL13B_KAN582-10_2.tif:0028-0978	0.572	192.545	68	326	195.186	157.79	0.423	110.143	4236	3.422	0.292	0.611	0.0498051
60	ARL13B_KAN582-10_2.tif:0029-1015	2.21	691.282	132	1676	216.895	163.734	0.563	1527.83	58759	3.456	0.289	0.85	0.690863
61	ARL13B_KAN582-10_3.tif:0001-0031	4.914	787.91	152	2860	90.009	5.382	0.52	3872.02	148915	2.641	0.379	0.754	1.75088
62	ARL13B_KAN582-10_3.tif:0002-0066	3.406	605.557	99	2074	213.965	10.585	0.381	2062.65	79328	4.638	0.216	0.682	0.932705
63	ARL13B_KAN582-10_3.tif:0003-0057	1.326	584.98	162	1229	63.55	9.221	0.598	775.731	29834	3.848	0.26	0.927	0.350775
64	ARL13B_KAN582-10_3.tif:0004-0064	1.534	748.102	28	2607	67.683	10.351	0.533	1147.66	44138	2.563	0.39	0.792	0.518956
65	ARL13B_KAN582-10_3.tif:0005-0121	2.86	867.136	150	2917	125.691	19.819	0.56	2480.16	95385	2.764	0.362	0.797	1.1215
66	ARL13B_KAN582-10_3.tif:0006-0127	4.03	620.4	47	1608	31.292	20.546	0.533	2500.36	96162	3.371	0.297	0.849	1.13063
67	ARL13B_KAN582-10_3.tif:0007-0128	3.77	343.214	104	1307	53.412	20.816	0.345	1293.99	49766	5.275	0.19	0.695	0.585127
68	ARL13B_KAN582-10_3.tif:0008-0221	0.754	157.621	83	205	155.164	35.911	0.596	118.853	4571	1.231	0.812	0.716	0.0537439
69	ARL13B_KAN582-10_3.tif:0009-0237	3.224	500.315	131	1609	183.058	38.219	0.536	1613.11	62039	3.287	0.304	0.8	0.729428
70	ARL13B_KAN582-10_3.tif:0010-0237	3.25	356.336	94	864	115.401	38.247	0.473	1158.16	44542	3.346	0.299	0.729	0.523706
71	ARL13B_KAN582-10_3.tif:0011-0263	1.924	474.743	83	1255	56.372	42.38	0.432	913.461	35131	3.949	0.253	0.708	0.413055
72	ARL13B_KAN582-10_3.tif:0012-0345	3.146	548.298	60	1726	108.907	55.828	0.398	1725.05	66344	3.974	0.252	0.663	0.780044
73	ARL13B_KAN582-10_3.tif:0013-0348	3.016	440.474	78	1134	208.624	56.122	0.443	1328.55	51095	3.436	0.291	0.699	0.600753
74	ARL13B_KAN582-10_3.tif:0014-0359	2.21	495.353	91	1348	69.642	58.076	0.548	1094.8	42105	3.418	0.293	0.867	0.495053
75	ARL13B_KAN582-10_3.tif:0015-0486	3.692	460.296	152	1250	108.803	78.364	0.597	1699.51	65362	3.574	0.28	0.823	0.768498
76	ARL13B_KAN582-10_3.tif:0016-0520	3.77	513.862	39	1428	30.149	83.523	0.379	1937.38	74510	3.259	0.307	0.62	0.876057
77	ARL13B_KAN582-10_3.tif:0017-0547	2.652	370.725	12	1272	88.335	88.031	0.412	983.223	37814	4.547	0.22	0.747	0.444601
78	ARL13B_KAN582-10_3.tif:0018-0596	3.744	718.104	142	2383	168.32	96.001	0.555	2688.74	103407	2.97	0.337	0.807	1.21582
79	ARL13B_KAN582-10_3.tif:0019-0616	4.862	724.118	145	2459	46.067	99.425	0.512	3520.87	135410	3.854	0.259	0.835	1.59209
80	ARL13B_KAN582-10_3.tif:0020-0624	3.068	375.237	145	1019	78.991	100.554	0.478	1151.3	44278	4.19	0.239	0.831	0.520602
81	ARL13B_KAN582-10_3.tif:0021-0765	2.808	594.62	99	2677	121.594	123.52	0.503	1669.8	64219	3.727	0.268	0.794	0.755059
82	ARL13B_KAN582-10_3.tif:0022-0771	2.886	781.468	114	2294	52.982	124.622	0.446	2255.45	86743	3.381	0.296	0.703	1.01989
83	ARL13B_KAN582-10_3.tif:0023-0843	2.912	427.08	147	1117	84.591	136.016	0.508	1243.73	47833	3.63	0.276	0.767	0.5624
84	ARL13B_KAN582-10_3.tif:0024-0843	4.238	724.564	126	2309	99.02	136.12	0.536	3070.89	118104	3.002	0.333	0.847	1.38862
85	ARL13B_KAN582-10_3.tif:0025-0883	1.508	409.086	152	1060	15.102	142.303	0.543	616.939	23727	3.245	0.308	0.763	0.278972
86	ARL13B_KAN582-10_3.tif:0026-0888	3.484	545.343	120	1573	47.371	143.031	0.444	1900.09	73076	3.79	0.264	0.718	0.859196
87	ARL13B_KAN582-10_3.tif:0027-0957	2.002	275.727	111	709	96.11	154.202	0.363	552.039	21231	4.676	0.214	0.7	0.249625
88	ARL13B_KAN582-10_3.tif:0028-1010	2.132	639.695	119	2411	152.218	162.868	0.444	1363.91	52455	3.883	0.258	0.759	0.616743
89	ARL13B_KAN582-10_4.tif:0001-0090	2.054	412.481	0	1533	143.22	14.514	0.562	847.287	32586	2.543	0.393	0.756	0.383132
90	ARL13B_KAN582-10_4.tif:0002-0163	3.094	432.739	122	1259	70.708	26.203	0.442	1338.98	51496	3.847	0.26	0.726	0.605468
91	ARL13B_KAN582-10_4.tif:0003-0202	2.574	468.051	58	1671	207.878	32.479	0.31	1204.84	46337	4.791	0.209	0.559	0.544811
92	ARL13B_KAN582-10_4.tif:0004-0215	2.444	898.926	74	2616	110.046	34.794	0.478	2197.11	84499	2.85	0.351	0.755	0.993503
93	ARL13B_KAN582-10_4.tif:0005-0257	3.406	560.893	89	1547	92.174	41.449	0.594	1910.52	73477	3.118	0.321	0.856	0.863911
94	ARL13B_KAN582-10_4.tif:0006-0275	2.938	492.23	51	1497	171.605	44.367	0.419	1446.26	55622	3.412	0.293	0.644	0.65398
95	ARL13B_KAN582-10_4.tif:0007-0297	4.238	642.822	96	2060	103.49	47.815	0.518	2724.44	104780	3.19	0.313	0.799	1.23196
96	ARL13B_KAN582-10_4.tif:0008-0343	4.446	538.456	120	1602	200.45	55.354	0.553	2394.12	92076	3.361	0.298	0.847	1.08259
97	ARL13B_KAN582-10_4.tif:0009-0380	2.964	630.728	129	2400	89.75	61.271	0.569	1869.59	71903	3.204	0.312	0.814	0.845405
98	ARL13B_KAN582-10_4.tif:0010-0430	4.212	457.346	44	1994	156.258	69.208	0.296	1926.46	74090	6.906	0.145	0.681	0.871118
99	ARL13B_KAN582-10_4.tif:0011-0425	3.484	576.037	151	1446	19.143	68.558	0.512	2007.04	77189	3.783	0.264	0.835	0.907555
100	ARL13B_KAN582-10_4.tif:0012-0438	3.874	368.221	73	1481	139.513	70.635	0.404	1426.58	54865	4.957	0.202	0.828	0.645079
101	ARL13B_KAN582-10_4.tif:0013-0512	2.08	588.475	89	1532	218.744	82.602	0.492	1224.1	47078	4.124	0.242	0.78	0.553523
102	ARL13B_KAN582-10_4.tif:0014-0538	3.094	726.361	150	3036	44.484	86.801	0.482	2247.5	86437	3.682	0.272	0.773	1.01629
103	ARL13B_KAN582-10_4.tif:0015-0534	4.29	871.885	139	2622	61.413	86.175	0.457	3740.61	143861	4.221	0.237	0.825	1.69146
104	ARL13B_KAN582-10_4.tif:0016-0541	1.768	381.956	147	945	1.143	87.4	0.434	675.339	25973	4.752	0.21	0.747	0.305379
105	ARL13B_KAN582-10_4.tif:0017-0580	3.406	568.26	72	1677	131.075	93.391	0.49	1935.61	74442	3.646	0.274	0.792	0.875257
106	ARL13B_KAN582-10_4.tif:0018-0624	4.264	850.311	74	2881	140.274	100.533	0.445	3625.94	139451	4.205	0.238	0.713	1.63961
107	ARL13B_KAN582-10_4.tif:0019-0655	5.408	864.361	79	2837	167.616	105.746	0.469	4674.74	179787	4.461	0.224	0.87	2.11386
108	ARL13B_KAN582-10_4.tif:0020-0679	3.692	563.049	143	1739	80.882	109.59	0.549	2078.9	79953	3.337	0.3	0.796	0.940053
109	ARL13B_KAN582-10_4.tif:0021-0701	2.73	266.848	0	639	148.282	112.9	0.301	728.538	28019	4.236	0.236	0.498	0.329435
110	ARL13B_KAN582-10_4.tif:0022-0703	3.12	652.717	151	1641	214.043	113.559	0.486	2036.6	78326	2.962	0.338	0.729	0.920924
111	ARL13B_KAN582-10_4.tif:0023-0779	3.51	764.385	13	3221	127.981	125.55	0.336	2683.15	103192	4.601	0.217	0.672	1.21329
112	ARL13B_KAN582-10_4.tif:0024-0777	1.56	232.733	95	535	204.457	125.38	0.493	363.086	13964	3.035	0.329	0.702	0.164183
113	ARL13B_KAN582-10_4.tif:0025-0840	3.094	669.773	91	2888	158.126	135.536	0.431	2072.4	79703	4.379	0.228	0.741	0.937114
114	ARL13B_KAN582-10_4.tif:0026-0884	2.262	353.897	10	1004	50.806	142.763	0.407	800.562	30789	4.588	0.218	0.773	0.362004
115	ARL13B_KAN582-10_4.tif:0027-0889	3.354	756.419	75	2824	168.261	143.417	0.398	2537.18	97578	4.4	0.227	0.705	1.14728
116	ARL13B_KAN582-10_4.tif:0028-0896	2.028	373.526	119	855	4.441	144.714	0.391	757.556	29135	3.91	0.256	0.647	0.342557
117	ARL13B_KAN582-10_4.tif:0029-0938	1.794	414.362	105	1155	73.036	151.422	0.464	743.411	28591	3.076	0.325	0.742	0.336161
118	ARL13B_KAN582-10_4.tif:0030-0945	3.328	474.062	51	1830	102.901	152.21	0.37	1577.78	60680	4.753	0.21	0.717	0.713449
119	ARL13B_KAN582-10_4.tif:0031-0951	3.484	585.127	94	2404	130.412	153.486	0.478	2038.7	78407	3.162	0.316	0.738	0.921876
120	ARL13B_KAN582-10_4.tif:0032-0970	3.51	471.733	93	1434	109.381	156.367	0.488	1655.88	63684	4.299	0.233	0.86	0.748769
121	ARL13B_KAN582-10_4.tif:0033-0981	2.002	304.688	54	606	33.158	158.353	0.268	610.023	23461	7.334	0.136	0.7	0.275844
122	ARL13B_KAN582-10_4.tif:0034-0996	2.938	469.301	110	1513	191.531	160.788	0.435	1378.89	53031	4.357	0.229	0.734	0.623516
123	ARL13B_KAN582-10_4.tif:0035-1034	1.066	532.512	99	1425	172.256	166.86	0.567	567.692	21833	2.712	0.369	0.812	0.256703
124	ARL13B_KAN582-10_5.tif:0001-0025	4.446	449.404	26	1616	68.63	4.168	0.386	1998.17	76848	5.643	0.177	0.763	0.903546
125	ARL13B_KAN582-10_5.tif:0002-0017	4.03	476.426	138	1154	161.814	2.839	0.466	1920.11	73846	4.344	0.23	0.876	0.86825
126	ARL13B_KAN582-10_5.tif:0003-0060	2.782	588.673	115	1844	177.312	9.603	0.405	1637.79	62988	4.328	0.231	0.721	0.740586
127	ARL13B_KAN582-10_5.tif:0004-0070	1.612	186.5	96	277	47.678	11.194	0.507	300.656	11563	1.909	0.524	0.756	0.135953
128	ARL13B_KAN582-10_5.tif:0005-0075	1.326	382.941	151	856	8.472	12.231	0.419	507.811	19530	4.996	0.2	0.708	0.229625
129	ARL13B_KAN582-10_5.tif:0006-0098	4.004	377.675	10	1199	70.953	15.57	0.406	1512.3	58162	3.937	0.254	0.667	0.683844
130	ARL13B_KAN582-10_5.tif:0007-0264	3.12	339.225	72	1168	34.584	42.778	0.373	1058.45	40707	3.805	0.263	0.623	0.478615
131	ARL13B_KAN582-10_5.tif:0008-0300	4.472	573.157	92	1432	137.627	48.383	0.464	2563.31	98583	4.536	0.22	0.841	1.1591
132	ARL13B_KAN582-10_5.tif:0009-0330	2.808	453.019	85	1450	61.823	53.099	0.515	1272.15	48926	2.87	0.348	0.679	0.575251
133	ARL13B_KAN582-10_5.tif:0010-0438	1.04	224.9	78	379	212.931	70.68	0.521	233.91	8996	4.512	0.222	0.976	0.105771
134	ARL13B_KAN582-10_5.tif:0011-0491	4.056	769.609	33	2248	117.938	79.233	0.395	3121.72	120059	4.707	0.212	0.734	1.4116
135	ARL13B_KAN582-10_5.tif:0012-0540	3.172	673.311	100	1704	18.082	87.138	0.518	2135.87	82144	3.344	0.299	0.762	0.965814
136	ARL13B_KAN582-10_5.tif:0013-0571	3.042	424.419	78	1459	59.476	92.134	0.508	1291.16	49657	3.913	0.256	0.836	0.583846
137	ARL13B_KAN582-10_5.tif:0014-0572	3.406	765.191	120	2364	203.379	92.264	0.576	2606.4	100240	2.948	0.339	0.848	1.17858
138	ARL13B_KAN582-10_5.tif:0015-0577	3.562	815.066	122	2849	43.419	93.043	0.377	2903.44	111664	5.038	0.198	0.763	1.3129
139	ARL13B_KAN582-10_5.tif:0016-0638	2.964	570.193	94	1969	15.356	102.805	0.349	1690.15	65002	5.14	0.195	0.681	0.764266
140	ARL13B_KAN582-10_5.tif:0017-0658	4.108	976.525	141	3837	166.986	106.254	0.433	4011.81	154291	4.357	0.23	0.798	1.81409
141	ARL13B_KAN582-10_5.tif:0018-0731	1.014	237.641	61	495	213.46	117.863	0.324	240.983	9268	4.736	0.211	0.553	0.108969
142	ARL13B_KAN582-10_5.tif:0019-0758	3.146	931	81	3012	96.35	121.964	0.41	2929.1	112651	3.869	0.258	0.733	1.3245
143	ARL13B_KAN582-10_5.tif:0020-0755	2.08	633.688	89	1742	75.576	121.762	0.595	1318.15	50695	2.921	0.342	0.833	0.59605
144	ARL13B_KAN582-10_5.tif:0021-0779	3.848	764.068	2	2369	50.503	125.929	0.409	2940.31	113082	4.722	0.212	0.836	1.32957
145	ARL13B_KAN582-10_5.tif:0022-0776	0.728	171.214	80	239	220.648	125.049	0.515	124.652	4794	2.396	0.417	0.691	0.0563658
146	ARL13B_KAN582-10_5.tif:0023-0795	4.108	670.228	109	1943	131.198	128.616	0.35	2753.46	105896	3.701	0.27	0.621	1.24508
147	ARL13B_KAN582-10_5.tif:0024-0813	3.38	651.292	135	2567	100.495	131.081	0.483	2201.5	84668	3.089	0.324	0.72	0.99549
148	ARL13B_KAN582-10_5.tif:0025-0841	3.536	640.404	32	2394	190.809	135.541	0.445	2264.61	87095	4.263	0.235	0.735	1.02403
149	ARL13B_KAN582-10_5.tif:0026-0838	2.99	705.209	71	1900	160.552	135.357	0.472	2108.7	81099	3.406	0.294	0.742	0.953527
150	ARL13B_KAN582-10_5.tif:0027-0871	2.392	323.109	127	982	123.3	140.431	0.434	772.923	29726	4.204	0.238	0.662	0.349506
151	ARL13B_KAN582-10_5.tif:0028-0932	3.042	453.735	100	1326	83.844	150.519	0.413	1380.35	53087	4.381	0.228	0.724	0.624174
152	ARL13B_KAN582-10_5.tif:0029-0929	2.47	724.895	59	2256	201.431	149.822	0.541	1790.6	68865	3.442	0.29	0.892	0.809685
153	ARL13B_KAN582-10_5.tif:0030-1002	2.21	816.635	155	2059	8.136	161.721	0.547	1804.87	69414	3.776	0.265	0.813	0.81614
154	ARL13B_KAN582-10_6.tif:0001-0007	2.314	385.034	101	920	126.334	0.923	0.502	891.022	34268	2.985	0.335	0.844	0.402908
155	ARL13B_KAN582-10_6.tif:0002-0069	1.56	396.633	66	981	119.266	11.013	0.512	618.785	23798	2.884	0.347	0.769	0.279807
156	ARL13B_KAN582-10_6.tif:0003-0080	2.392	459.793	99	1204	52.061	12.825	0.583	1099.89	42301	2.972	0.337	0.79	0.497357
157	ARL13B_KAN582-10_6.tif:0004-0093	2.86	561.636	154	1842	166.634	15.018	0.562	1606.38	61780	3.491	0.286	0.818	0.726383
158	ARL13B_KAN582-10_6.tif:0005-0105	3.718	557.077	78	2687	98.011	16.98	0.427	2071.34	79662	3.938	0.254	0.745	0.936632
159	ARL13B_KAN582-10_6.tif:0006-0118	2.834	401.743	43	1706	69.943	19.076	0.447	1138.61	43790	3.721	0.269	0.727	0.514864
160	ARL13B_KAN582-10_6.tif:0007-0126	2.574	622.535	159	1472	13.282	20.401	0.497	1602.5	61631	4.198	0.238	0.828	0.724631
161	ARL13B_KAN582-10_6.tif:0008-0223	2.86	863.409	136	2429	166.244	35.877	0.499	2469.5	94975	3.843	0.26	0.859	1.11668
162	ARL13B_KAN582-10_6.tif:0009-0228	3.12	509.325	90	1397	199.515	37.026	0.421	1589.19	61119	4.386	0.228	0.741	0.718611
163	ARL13B_KAN582-10_6.tif:0010-0265	2.08	459.312	120	1076	20.65	42.731	0.582	955.428	36745	3.692	0.271	0.86	0.432032
164	ARL13B_KAN582-10_6.tif:0011-0287	3.016	763.871	128	2418	145.422	46.277	0.556	2303.97	88609	3.46	0.289	0.85	1.04183
165	ARL13B_KAN582-10_6.tif:0012-0317	2.964	1168.75	157	4135	59.716	51.164	0.538	3464.4	133238	3.681	0.272	0.794	1.56656
166	ARL13B_KAN582-10_6.tif:0013-0324	4.056	574.673	34	1706	114.599	52.233	0.454	2331.01	89649	4.279	0.234	0.77	1.05405
167	ARL13B_KAN582-10_6.tif:0014-0365	2.47	637.842	114	1875	2.454	58.813	0.36	1575.57	60595	5.2	0.192	0.691	0.71245
168	ARL13B_KAN582-10_6.tif:0015-0373	2.808	1020.19	150	3210	102.053	60.451	0.527	2864.88	110181	2.985	0.335	0.753	1.29546
169	ARL13B_KAN582-10_6.tif:0016-0371	3.016	691.422	70	2032	37.019	59.768	0.429	2085.46	80205	4.351	0.23	0.814	0.943016
170	ARL13B_KAN582-10_6.tif:0017-0427	4.368	492.946	151	1672	154.942	68.955	0.48	2153.32	82815	3.703	0.27	0.745	0.973703
171	ARL13B_KAN582-10_6.tif:0018-0429	3.302	591.449	64	1897	94.828	69.115	0.441	1953.08	75114	4.175	0.24	0.73	0.883158
172	ARL13B_KAN582-10_6.tif:0019-0443	2.47	959.621	160	3041	202.5	71.465	0.566	2370.41	91164	3.6	0.278	0.819	1.07187
173	ARL13B_KAN582-10_6.tif:0020-0491	2.288	406.227	73	1100	7.85	78.992	0.327	929.504	35748	4.61	0.217	0.597	0.42031
174	ARL13B_KAN582-10_6.tif:0021-0566	3.146	450.405	150	1284	79.197	91.355	0.342	1417.06	54499	5.291	0.189	0.667	0.640776
175	ARL13B_KAN582-10_6.tif:0022-0650	3.016	473.138	71	1607	100.438	104.971	0.36	1427.07	54884	4.838	0.207	0.659	0.645303
176	ARL13B_KAN582-10_6.tif:0023-0681	2.522	351.227	48	984	211.154	109.604	0.243	885.847	34069	3.187	0.314	0.439	0.400569
177	ARL13B_KAN582-10_6.tif:0024-0711	3.77	532.938	29	1968	99.854	114.536	0.459	2009.3	77276	3.124	0.32	0.697	0.908578
178	ARL13B_KAN582-10_6.tif:0025-0810	1.482	257.667	144	495	1.557	130.625	0.517	381.885	14687	3.441	0.291	0.726	0.172683
179	ARL13B_KAN582-10_6.tif:0026-0817	2.99	756.313	150	2357	91.115	131.675	0.555	2261.51	86976	3.685	0.271	0.83	1.02263
180	ARL13B_KAN582-10_6.tif:0027-0824	4.03	760.587	115	2656	140.351	132.751	0.435	3065.35	117891	4.403	0.227	0.781	1.38611
181	ARL13B_KAN582-10_6.tif:0028-0875	3.354	606	35	1931	54.863	140.968	0.381	2032.65	78174	5.459	0.183	0.801	0.919136
182	ARL13B_KAN582-10_6.tif:0029-0880	5.226	505.219	78	1449	163.675	141.995	0.455	2640.43	101549	4.072	0.246	0.815	1.19397
183	ARL13B_KAN582-10_6.tif:0030-0888	2.132	515.524	153	1047	7.707	143.336	0.448	1099.16	42273	4.003	0.25	0.716	0.497028
184	ARL13B_KAN582-10_6.tif:0031-0965	2.548	529.694	82	1488	75.575	155.379	0.499	1349.74	51910	3	0.333	0.718	0.610336
185	ARL13B_KAN582-10_6.tif:0032-0998	2.444	216.117	88	389	195.294	160.893	0.338	528.222	20315	2.955	0.338	0.578	0.238855
										63429.9				0.745782
186	ARL13B_KAN582-11_1.tif:0001-0021	2.548	558.153	87	1838	77.448	3.35	0.438	1422.26	54699	4.141	0.241	0.7	0.643127
187	ARL13B_KAN582-11_1.tif:0002-0033	3.692	1095.96	115	3754	125.508	5.343	0.443	4046.52	155626	4.289	0.233	0.8	1.82978
188	ARL13B_KAN582-11_1.tif:0003-0031	1.378	379.698	100	682	177.179	4.952	0.534	523.256	20124	3.839	0.26	0.922	0.236609
189	ARL13B_KAN582-11_1.tif:0004-0097	3.64	654.129	127	1653	125.851	15.946	0.494	2381.17	91578	3.31	0.302	0.805	1.07673
190	ARL13B_KAN582-11_1.tif:0005-0089	3.354	658	71	1924	209.222	14.412	0.436	2207.07	84882	5.13	0.195	0.89	0.998006
191	ARL13B_KAN582-11_1.tif:0006-0102	2.132	290.402	15	867	3.797	16.064	0.275	619.175	23813	3.991	0.251	0.505	0.279983
192	ARL13B_KAN582-11_1.tif:0007-0104	4.134	1149.29	155	3545	104.423	16.945	0.513	4751.45	182737	3.659	0.273	0.824	2.14854
193	ARL13B_KAN582-11_1.tif:0008-0170	4.602	606.734	152	1798	98.204	27.58	0.435	2792.36	107392	4.255	0.235	0.733	1.26267
194	ARL13B_KAN582-11_1.tif:0009-0174	3.718	980.657	88	2906	151.486	27.899	0.514	3646.3	140234	2.424	0.413	0.735	1.64881
195	ARL13B_KAN582-11_1.tif:0010-0212	2.912	922.795	57	2293	84.334	34.005	0.387	2687.34	103353	4.552	0.22	0.786	1.21518
196	ARL13B_KAN582-11_1.tif:0011-0238	4.264	752.311	151	2409	48.321	38.484	0.499	3208.05	123379	3.681	0.272	0.843	1.45064
197	ARL13B_KAN582-11_1.tif:0012-0240	3.406	952.427	109	3288	184.206	38.697	0.441	3244.16	124768	4.323	0.231	0.753	1.46697
198	ARL13B_KAN582-11_1.tif:0013-0263	3.12	897	105	3339	116.167	42.592	0.575	2798.81	107640	3.146	0.318	0.854	1.26558
199	ARL13B_KAN582-11_1.tif:0014-0314	2.886	525.225	63	2153	205.244	50.424	0.369	1515.89	58300	3.137	0.319	0.603	0.685466
200	ARL13B_KAN582-11_1.tif:0015-0407	4.056	523.872	63	2242	40.615	65.731	0.314	2124.95	81724	3.804	0.263	0.559	0.960876
201	ARL13B_KAN582-11_1.tif:0016-0428	3.328	476.359	125	1291	23.185	69.094	0.441	1585.42	60974	4.789	0.209	0.821	0.716906
202	ARL13B_KAN582-11_1.tif:0017-0510	3.536	800.735	51	2686	178.013	82.463	0.437	2831.57	108900	3.483	0.287	0.773	1.2804
203	ARL13B_KAN582-11_1.tif:0018-0585	2.99	695.139	92	2557	85.26	94.088	0.452	2078.59	79941	3.258	0.307	0.712	0.939912
204	ARL13B_KAN582-11_1.tif:0019-0599	2.288	823.739	123	2164	206.629	96.602	0.527	1884.83	72489	3.093	0.323	0.775	0.852295
205	ARL13B_KAN582-11_1.tif:0020-0620	4.29	1103.16	150	3291	133.363	100.02	0.4	4732.86	182022	4.523	0.221	0.742	2.14014
206	ARL13B_KAN582-11_1.tif:0021-0627	1.768	584.456	68	1646	3.778	100.779	0.509	1033.38	39743	2.181	0.458	0.764	0.467281
207	ARL13B_KAN582-11_1.tif:0022-0683	4.394	748.609	125	1798	166.701	110.192	0.256	3289.59	126515	5.091	0.196	0.59	1.48751
208	ARL13B_KAN582-11_1.tif:0023-0704	3.744	665.965	104	2165	51.274	113.683	0.449	2493.52	95899	3.21	0.312	0.731	1.12754
209	ARL13B_KAN582-11_1.tif:0024-0720	3.926	1004.23	54	3588	158.046	116.127	0.424	3942.82	151638	4.757	0.21	0.812	1.78289
210	ARL13B_KAN582-11_1.tif:0025-0716	3.926	609.159	54	1796	178.513	115.715	0.32	2391.7	91983	4.741	0.211	0.637	1.0815
211	ARL13B_KAN582-11_1.tif:0026-0748	4.03	820.129	112	2612	139.706	120.765	0.592	3305.32	127120	2.704	0.37	0.84	1.49462
212	ARL13B_KAN582-11_1.tif:0027-0780	3.172	614.59	112	1924	36.707	125.915	0.449	1949.6	74980	3.693	0.271	0.739	0.881583
213	ARL13B_KAN582-11_1.tif:0028-0784	2.496	850.948	78	2869	166.313	126.576	0.441	2124.09	81691	4.122	0.243	0.768	0.960488
214	ARL13B_KAN582-11_1.tif:0029-0791	4.004	1532.77	75	5626	107.75	127.603	0.552	6137.57	236046	3.571	0.28	0.873	2.77533
215	ARL13B_KAN582-11_1.tif:0030-0842	3.406	412.382	132	814	131.301	135.808	0.518	1404.66	54022	3.789	0.264	0.862	0.635168
216	ARL13B_KAN582-11_1.tif:0031-0995	3.042	1152.48	133	3823	173.459	160.455	0.533	3506.05	134840	3.519	0.284	0.836	1.58539
217	ARL13B_KAN582-11_1.tif:0032-1004	2.184	528.298	74	1767	150.64	161.968	0.39	1153.87	44377	4.54	0.22	0.712	0.521766
218	ARL13B_KAN582-11_2.tif:0001-0014	4.03	714.323	102	2025	128.595	1.973	0.37	2878.89	110720	3.578	0.279	0.619	1.3018
219	ARL13B_KAN582-11_2.tif:0002-0055	3.614	727.727	134	2160	38.67	8.794	0.421	2630.16	101154	4.932	0.203	0.803	1.18933
220	ARL13B_KAN582-11_2.tif:0003-0077	3.796	580.486	146	1353	67.613	12.463	0.441	2203.66	84751	4.775	0.209	0.823	0.996466
221	ARL13B_KAN582-11_2.tif:0004-0147	4.576	958.295	124	2958	134.713	23.795	0.419	4385.42	168660	4.864	0.206	0.856	1.98303
222	ARL13B_KAN582-11_2.tif:0005-0162	3.978	366.706	130	862	17.211	26.222	0.368	1458.84	56106	5.609	0.178	0.787	0.65967
223	ARL13B_KAN582-11_2.tif:0006-0176	3.952	900.092	24	3154	80.236	28.429	0.439	3557.38	136814	1.998	0.5	0.691	1.6086
224	ARL13B_KAN582-11_2.tif:0007-0217	3.094	888.21	145	2724	193.219	35.123	0.442	2748.29	105697	4.161	0.24	0.793	1.24274
225	ARL13B_KAN582-11_2.tif:0008-0232	2.132	265.537	66	806	93.324	37.469	0.295	566.158	21774	5.473	0.183	0.521	0.256009
226	ARL13B_KAN582-11_2.tif:0009-0249	2.47	467.4	134	1368	49.034	40.166	0.551	1154.55	44403	3.007	0.333	0.805	0.522071
227	ARL13B_KAN582-11_2.tif:0010-0257	3.744	429.771	109	1170	2.32	41.51	0.451	1609.16	61887	4.386	0.228	0.804	0.727641
228	ARL13B_KAN582-11_2.tif:0011-0298	5.694	299.201	147	554	47.884	48.281	0.428	1703.75	65525	4.587	0.218	0.789	0.770415
229	ARL13B_KAN582-11_2.tif:0012-0324	4.108	742.209	27	2757	139.85	52.187	0.493	3049.18	117269	3.581	0.279	0.825	1.3788
230	ARL13B_KAN582-11_2.tif:0013-0352	4.264	1046.41	64	4053	131.537	56.656	0.44	4462.15	171611	3.831	0.261	0.721	2.01773
231	ARL13B_KAN582-11_2.tif:0014-0434	2.652	337.696	105	721	40.203	70.262	0.512	895.624	34445	1.798	0.556	0.761	0.40499
232	ARL13B_KAN582-11_2.tif:0015-0494	4.394	909.793	151	2864	49.94	79.835	0.533	3997.87	153755	3.253	0.307	0.79	1.80779
233	ARL13B_KAN582-11_2.tif:0016-0531	4.602	713.667	144	1686	181.118	85.668	0.586	3284.49	126319	3.129	0.32	0.863	1.4852
234	ARL13B_KAN582-11_2.tif:0017-0534	4.29	578.521	154	2099	205.996	86.247	0.528	2482.01	95456	3.467	0.288	0.789	1.12233
235	ARL13B_KAN582-11_2.tif:0018-0556	3.796	936.815	82	3044	93.316	89.824	0.501	3556.36	136775	2.996	0.334	0.747	1.60814
236	ARL13B_KAN582-11_2.tif:0019-0582	2.184	328.964	140	702	19.982	93.851	0.59	718.501	27633	2.497	0.401	0.812	0.324897
237	ARL13B_KAN582-11_2.tif:0020-0587	2.002	416.104	141	1144	87.455	94.797	0.349	833.09	32040	5.996	0.167	0.748	0.376713
238	ARL13B_KAN582-11_2.tif:0021-0668	5.122	604.772	69	1893	185.534	107.446	0.46	3097.83	119140	2.582	0.387	0.726	1.4008
239	ARL13B_KAN582-11_2.tif:0022-0677	6.76	581.715	24	1688	156.421	109.218	0.296	3932.63	151246	2.84	0.352	0.559	1.77829
240	ARL13B_KAN582-11_2.tif:0023-0672	3.38	590.438	96	1990	107.519	108.387	0.382	1995.8	76757	5.25	0.19	0.758	0.902476
241	ARL13B_KAN582-11_2.tif:0024-0682	3.12	522.142	85	1300	10.661	110.006	0.418	1629.18	62657	3.388	0.295	0.706	0.736694
242	ARL13B_KAN582-11_2.tif:0025-0701	4.446	429.573	76	1407	67.17	113.088	0.398	1910	73457	4.269	0.234	0.745	0.863676
243	ARL13B_KAN582-11_2.tif:0026-0752	4.472	443.047	36	1373	162.649	121.246	0.476	1981.42	76204	3.289	0.304	0.749	0.895974
244	ARL13B_KAN582-11_2.tif:0027-0774	4.29	612.376	6	1910	135.7	124.913	0.296	2627.25	101042	7.296	0.137	0.724	1.18801
245	ARL13B_KAN582-11_2.tif:0028-0820	3.926	912.232	95	2924	151.54	132.089	0.378	3581.64	137747	4.301	0.232	0.704	1.61957
246	ARL13B_KAN582-11_2.tif:0029-0830	2.912	1077.34	151	2693	206.746	133.902	0.462	3137.4	120662	4.566	0.219	0.852	1.41869
247	ARL13B_KAN582-11_2.tif:0030-0878	1.664	361.719	150	865	47.788	141.625	0.327	601.936	23150	6.484	0.154	0.634	0.272188
248	ARL13B_KAN582-11_2.tif:0031-0938	5.434	966.273	76	2937	108.715	151.545	0.349	5251.04	201951	4.735	0.211	0.676	2.37445
249	ARL13B_KAN582-11_2.tif:0032-0945	2.964	381.614	136	1118	8.678	152.367	0.554	1131.17	43504	3.479	0.287	0.835	0.511501
250	ARL13B_KAN582-11_2.tif:0033-0964	3.328	318.766	150	587	68.021	155.426	0.591	1060.92	40802	2.957	0.338	0.81	0.479732
251	ARL13B_KAN582-11_2.tif:0034-0969	3.536	521.213	66	1481	178.615	156.018	0.458	1843.12	70885	3.052	0.328	0.69	0.833435
252	ARL13B_KAN582-11_2.tif:0035-0995	3.068	778.322	155	1943	11.483	160.583	0.417	2388.04	91842	4.57	0.219	0.722	1.07984
253	ARL13B_KAN582-11_2.tif:0036-1025	2.808	488.759	150	1131	27.728	165.351	0.355	1372.52	52786	5.986	0.167	0.699	0.620635
254	ARL13B_KAN582-11_2.tif:0037-1032	1.352	232.962	79	500	153.392	166.723	0.58	314.983	12114	2.129	0.47	0.77	0.142431
255	ARL13B_KAN582-11_3.tif:0001-0022	2.86	377.382	134	760	2.063	3.6	0.529	1079.38	41512	3.714	0.269	0.84	0.48808
256	ARL13B_KAN582-11_3.tif:0002-0047	4.056	817.34	50	2063	207.629	7.306	0.357	3315.33	127505	2.753	0.363	0.601	1.49915
257	ARL13B_KAN582-11_3.tif:0003-0057	2.912	942.571	93	2663	60.087	9.43	0.484	2744.93	105568	3.638	0.275	0.833	1.24122
258	ARL13B_KAN582-11_3.tif:0004-0087	3.328	692.109	121	1670	90.24	14.022	0.463	2303.48	88590	4.621	0.216	0.865	1.0416
259	ARL13B_KAN582-11_3.tif:0005-0084	2.86	856.173	80	3209	143.75	13.832	0.571	2448.8	94179	2.703	0.37	0.849	1.10732
260	ARL13B_KAN582-11_3.tif:0006-0125	4.03	502.794	152	1472	18.394	20.263	0.438	2026.38	77933	4.708	0.212	0.805	0.916303
261	ARL13B_KAN582-11_3.tif:0007-0131	3.458	615.113	137	1809	190.671	21.099	0.364	2127.19	81810	5.46	0.183	0.739	0.961887
262	ARL13B_KAN582-11_3.tif:0008-0138	4.68	764.472	119	2930	49.676	22.163	0.402	3577.95	137605	4.828	0.207	0.822	1.6179
263	ARL13B_KAN582-11_3.tif:0009-0172	4.082	490.299	34	1163	29.95	27.5	0.392	2001.52	76977	5.033	0.199	0.856	0.905063
264	ARL13B_KAN582-11_3.tif:0010-0187	4.082	720.376	18	2393	139.762	30.138	0.53	2940.75	113099	3.056	0.327	0.717	1.32977
265	ARL13B_KAN582-11_3.tif:0011-0198	4.108	621.791	137	1696	216.229	31.659	0.463	2554.47	98243	3.904	0.256	0.771	1.1551
266	ARL13B_KAN582-11_3.tif:0012-0227	2.236	388.558	151	795	193.359	36.527	0.588	868.868	33416	3.157	0.317	0.835	0.392891
267	ARL13B_KAN582-11_3.tif:0013-0242	3.12	432.833	47	1221	111.394	39.24	0.575	1350.52	51940	2.255	0.443	0.769	0.610688
268	ARL13B_KAN582-11_3.tif:0014-0246	4.394	485.84	90	1301	77.019	39.651	0.521	2134.91	82107	3.493	0.286	0.828	0.965379
269	ARL13B_KAN582-11_3.tif:0015-0268	2.548	450.827	139	954	14.54	43.342	0.368	1148.78	44181	5.672	0.176	0.695	0.519461
270	ARL13B_KAN582-11_3.tif:0016-0282	3.822	595.884	96	1494	203.879	45.551	0.375	2277.61	87595	3.5	0.286	0.618	1.0299
271	ARL13B_KAN582-11_3.tif:0017-0338	4.03	668.529	46	2212	29.679	54.395	0.335	2694.33	103622	6.003	0.167	0.751	1.21834
272	ARL13B_KAN582-11_3.tif:0018-0348	3.848	742.669	128	2826	139.305	56.275	0.447	2857.96	109915	4.104	0.244	0.777	1.29233
273	ARL13B_KAN582-11_3.tif:0019-0359	3.692	533.345	98	1942	178.886	58.189	0.287	1969.23	75735	6.607	0.151	0.668	0.89046
274	ARL13B_KAN582-11_3.tif:0020-0372	3.406	763.42	150	2765	200.77	60.141	0.517	2600.36	100008	3.829	0.261	0.806	1.17585
275	ARL13B_KAN582-11_3.tif:0021-0382	4.056	448.346	81	1132	17.667	61.667	0.375	1818.6	69942	4.782	0.209	0.724	0.822348
276	ARL13B_KAN582-11_3.tif:0022-0375	3.458	611.805	52	1753	154.991	60.545	0.404	2115.75	81370	4.431	0.226	0.727	0.956714
277	ARL13B_KAN582-11_3.tif:0023-0398	3.978	752.399	118	2289	137.524	64.096	0.441	2993.22	115117	4.36	0.229	0.841	1.3535
278	ARL13B_KAN582-11_3.tif:0024-0398	3.406	576.229	95	2089	86.517	64.181	0.432	1962.75	75486	4.061	0.246	0.753	0.887532
279	ARL13B_KAN582-11_3.tif:0025-0440	4.004	720.266	48	1916	47.655	71.046	0.467	2884.12	110921	4.27	0.234	0.885	1.30416
280	ARL13B_KAN582-11_3.tif:0026-0495	2.808	450.194	83	1656	65.611	79.79	0.35	1264.22	48621	5.793	0.173	0.78	0.571665
281	ARL13B_KAN582-11_3.tif:0027-0554	3.276	365.548	151	1017	4.974	89.382	0.424	1197.61	46059	4.875	0.205	0.834	0.541542
282	ARL13B_KAN582-11_3.tif:0028-0572	4.55	446.423	89	1303	134.055	91.999	0.535	2031.35	78124	2.782	0.359	0.771	0.918548
283	ARL13B_KAN582-11_3.tif:0029-0585	3.692	836.662	145	2346	185.003	94.598	0.369	3089.14	118806	2.999	0.333	0.576	1.39687
284	ARL13B_KAN582-11_3.tif:0030-0595	4.368	930.988	72	3109	96.969	95.987	0.426	4066.8	156406	4.431	0.226	0.765	1.83895
285	ARL13B_KAN582-11_3.tif:0031-0605	3.484	846.694	107	2650	109.287	97.453	0.488	2950.06	113457	3.454	0.289	0.757	1.33398
286	ARL13B_KAN582-11_3.tif:0032-0775	5.2	817	146	2672	84.173	124.841	0.407	4248.66	163400	4.451	0.225	0.734	1.92119
287	ARL13B_KAN582-11_3.tif:0033-0794	2.99	732.522	56	2091	199.415	127.922	0.456	2190.37	84240	3.304	0.303	0.712	0.990458
288	ARL13B_KAN582-11_3.tif:0034-0812	3.64	851.4	65	3090	181.654	131.036	0.456	3099.28	119196	3.464	0.289	0.729	1.40146
289	ARL13B_KAN582-11_3.tif:0035-0922	4.368	977.94	142	2593	88.464	148.707	0.43	4271.9	164294	4.07	0.246	0.747	1.9317
290	ARL13B_KAN582-11_4.tif:0001-0022	4.394	599.716	28	2705	137.827	3.402	0.342	2635.31	101352	5.939	0.168	0.697	1.19165
291	ARL13B_KAN582-11_4.tif:0002-0031	3.848	391.345	76	937	55.701	4.989	0.455	1505.98	57919	3.491	0.286	0.727	0.680987
292	ARL13B_KAN582-11_4.tif:0003-0040	3.77	585.662	110	1585	161.174	6.052	0.261	2208.08	84921	5.886	0.17	0.554	0.998465
293	ARL13B_KAN582-11_4.tif:0004-0049	4.784	744.859	153	2267	94.23	7.906	0.445	3563.62	137054	3.415	0.293	0.717	1.61142
294	ARL13B_KAN582-11_4.tif:0005-0053	2.886	665.216	109	1735	215.429	8.522	0.426	1919.93	73839	4.332	0.231	0.838	0.868167
295	ARL13B_KAN582-11_4.tif:0006-0097	4.03	548.606	143	1549	115.595	15.807	0.419	2211.02	85034	4.037	0.248	0.729	0.999793
296	ARL13B_KAN582-11_4.tif:0007-0139	2.418	430.785	152	809	1.671	22.397	0.517	1041.7	40063	3.846	0.26	0.842	0.471044
297	ARL13B_KAN582-11_4.tif:0008-0140	3.666	262.475	55	535	194.037	22.41	0.437	962.292	37009	2.605	0.384	0.667	0.435136
298	ARL13B_KAN582-11_4.tif:0009-0178	2.522	441.856	34	1345	82.594	28.71	0.407	1114.43	42860	5.958	0.168	0.882	0.503929
299	ARL13B_KAN582-11_4.tif:0010-0204	4.628	766.876	111	2350	171.295	32.998	0.439	3549.32	136504	3.282	0.305	0.709	1.60496
300	ARL13B_KAN582-11_4.tif:0011-0219	3.224	602.597	88	1273	7.645	35.384	0.466	1942.89	74722	4.759	0.21	0.841	0.878549
301	ARL13B_KAN582-11_4.tif:0012-0244	2.86	830.927	121	2724	31.175	39.448	0.443	2376.59	91402	4.12	0.243	0.738	1.07467
302	ARL13B_KAN582-11_4.tif:0013-0302	4.472	365.36	96	911	47.869	48.832	0.326	1633.99	62842	5.512	0.181	0.667	0.738869
303	ARL13B_KAN582-11_4.tif:0014-0305	1.274	192.49	76	396	127.35	49.068	0.276	245.247	9432	5.961	0.168	0.536	0.110897
304	ARL13B_KAN582-11_4.tif:0015-0374	3.094	471.874	113	1501	208.258	60.281	0.332	1460.07	56153	5.637	0.177	0.636	0.660223
305	ARL13B_KAN582-11_4.tif:0016-0374	3.588	858.348	72	3486	73.885	60.525	0.427	3079.94	118452	4.603	0.217	0.773	1.39271
306	ARL13B_KAN582-11_4.tif:0017-0378	2.808	655.25	53	2197	148.601	60.833	0.451	1840.05	70767	3.05	0.328	0.681	0.832048
307	ARL13B_KAN582-11_4.tif:0018-0443	3.354	614.364	114	1569	21.042	71.523	0.557	2060.7	79253	2.673	0.374	0.752	0.931823
308	ARL13B_KAN582-11_4.tif:0019-0459	3.458	1289.54	98	5896	75.997	74.21	0.543	4459.5	171509	2.46	0.407	0.729	2.01653
309	ARL13B_KAN582-11_4.tif:0020-0473	3.744	781.479	168	1865	43.931	76.259	0.573	2926.03	112533	3.393	0.295	0.862	1.32311
310	ARL13B_KAN582-11_4.tif:0021-0494	4.264	722.518	46	2633	131.654	79.634	0.486	3081	118493	4.006	0.25	0.85	1.39319
311	ARL13B_KAN582-11_4.tif:0022-0508	3.952	511.645	105	1790	119.902	81.816	0.411	2022.14	77770	4.28	0.234	0.715	0.914386
312	ARL13B_KAN582-11_4.tif:0023-0514	5.85	912.48	144	2899	158.407	82.86	0.409	5338.33	205308	5.117	0.195	0.809	2.41392
313	ARL13B_KAN582-11_4.tif:0024-0532	4.524	657.299	53	1902	198.702	86.058	0.546	2973.8	114370	2.974	0.336	0.796	1.34471
314	ARL13B_KAN582-11_4.tif:0025-0536	3.692	625.155	141	1810	91.508	86.503	0.435	2308.21	88772	4.258	0.235	0.789	1.04374
315	ARL13B_KAN582-11_4.tif:0026-0623	3.77	854.89	69	2601	201.854	100.629	0.43	3223.13	123959	3.771	0.265	0.716	1.45746
316	ARL13B_KAN582-11_4.tif:0027-0680	4.342	1068.3	77	3398	117.692	109.46	0.38	4638.84	178406	4.416	0.226	0.729	2.09762
317	ARL13B_KAN582-11_4.tif:0028-0755	3.12	902.858	106	3454	64.03	121.806	0.509	2817.09	108343	3.76	0.266	0.803	1.27385
318	ARL13B_KAN582-11_4.tif:0029-0759	4.602	528.153	130	1140	40.891	122.505	0.481	2430.7	93483	4.553	0.22	0.878	1.09913
319	ARL13B_KAN582-11_4.tif:0030-0836	4.732	971.599	97	2897	93.155	135.037	0.404	4597.88	176831	4.592	0.218	0.812	2.0791
320	ARL13B_KAN582-11_4.tif:0031-0839	3.172	1006.51	152	2741	222.403	135.241	0.554	3192.84	122794	3.457	0.289	0.875	1.44376
321	ARL13B_KAN582-11_4.tif:0032-0863	2.964	678.246	0	2641	157.925	139.221	0.441	2010.44	77320	4.552	0.22	0.82	0.909095
322	ARL13B_KAN582-11_4.tif:0033-0873	2.522	363.485	68	932	20.307	140.864	0.494	916.763	35258	2.81	0.356	0.738	0.414548
323	ARL13B_KAN582-11_4.tif:0034-0875	4.082	1095.61	113	4156	117.964	141.176	0.534	4472.53	172010	2.833	0.353	0.793	2.02242
324	ARL13B_KAN582-11_4.tif:0035-0979	2.834	614.532	104	1391	90.48	157.779	0.4	1741.69	66984	3.723	0.269	0.671	0.787569
325	ARL13B_KAN582-11_4.tif:0036-0995	3.25	617.208	59	1871	211.326	160.484	0.575	2006.05	77151	2.84	0.352	0.794	0.907108
326	ARL13B_KAN582-11_4.tif:0037-1025	3.354	868.581	135	2630	176.349	165.577	0.361	2913.4	112047	5.235	0.191	0.744	1.3174
327	ARL13B_KAN582-11_5.tif:0001-0084	2.782	566.561	102	1486	5.801	13.538	0.494	1576.27	60622	3.513	0.285	0.79	0.712767
328	ARL13B_KAN582-11_5.tif:0002-0094	3.432	730.371	110	2032	67.118	15.187	0.556	2506.78	96409	3.27	0.306	0.857	1.13354
329	ARL13B_KAN582-11_5.tif:0003-0192	2.886	651.351	86	1817	191.451	31.019	0.385	1879.91	72300	4.164	0.24	0.689	0.850072
330	ARL13B_KAN582-11_5.tif:0004-0208	4.472	737.826	19	2316	175.664	33.749	0.502	3299.76	126906	2.528	0.396	0.721	1.49211
331	ARL13B_KAN582-11_5.tif:0005-0225	2.392	305.728	20	868	154.94	36.143	0.462	731.346	28127	3.42	0.292	0.754	0.330705
332	ARL13B_KAN582-11_5.tif:0006-0288	3.042	723.094	154	2264	51.142	46.529	0.434	2199.78	84602	5	0.2	0.818	0.994714
333	ARL13B_KAN582-11_5.tif:0007-0327	2.86	512.545	36	1253	4.448	52.635	0.599	1465.97	56380	2.346	0.426	0.756	0.662892
334	ARL13B_KAN582-11_5.tif:0008-0459	2.808	424.139	135	1383	117.291	74.176	0.472	1191.05	45807	3.814	0.262	0.688	0.538579
335	ARL13B_KAN582-11_5.tif:0009-0494	2.964	598.43	109	1782	221.307	80	0.417	1773.85	68221	3.384	0.296	0.679	0.802113
336	ARL13B_KAN582-11_5.tif:0010-0547	2.912	755.152	78	2884	100.375	88.313	0.505	2199.13	84577	3.506	0.285	0.742	0.99442
337	ARL13B_KAN582-11_5.tif:0011-0580	4.472	612.407	103	2819	48.072	93.357	0.416	2738.85	105334	4.63	0.216	0.809	1.23847
338	ARL13B_KAN582-11_5.tif:0012-0599	4.576	304.386	93	549	214.16	96.507	0.589	1392.96	53572	2.887	0.346	0.795	0.629877
339	ARL13B_KAN582-11_5.tif:0013-0640	4.238	551.779	121	1932	83.429	103.298	0.522	2338.58	89940	3.505	0.285	0.811	1.05748
340	ARL13B_KAN582-11_5.tif:0014-0670	3.848	1053.61	79	3688	195.826	107.975	0.435	4054.53	155934	3.762	0.266	0.744	1.83341
341	ARL13B_KAN582-11_5.tif:0015-0671	4.342	935.018	73	2742	104.034	108.135	0.418	4060.09	156148	5.018	0.199	0.827	1.83592
342	ARL13B_KAN582-11_5.tif:0016-0726	3.614	1369.76	77	4943	159.26	117.167	0.459	4950.62	190397	4.097	0.244	0.84	2.23861
343	ARL13B_KAN582-11_5.tif:0017-0778	3.536	971.493	97	3927	140.653	125.629	0.493	3435.41	132123	3.972	0.252	0.793	1.55345
344	ARL13B_KAN582-11_5.tif:0018-0803	3.796	797.329	79	1971	198.85	129.549	0.4	3026.84	116410	5.11	0.196	0.793	1.3687
345	ARL13B_KAN582-11_5.tif:0019-0869	3.198	472.333	50	1275	51.892	140.383	0.28	1510.61	58097	5.662	0.177	0.647	0.68308
346	ARL13B_KAN582-11_5.tif:0020-0904	4.108	347.873	152	696	127.516	145.875	0.533	1429.15	54964	3.248	0.308	0.792	0.646243
347	ARL13B_KAN582-11_5.tif:0021-0934	3.276	731.992	95	2089	25.893	150.652	0.353	2398.15	92231	5.747	0.174	0.735	1.08441
348	ARL13B_KAN582-11_5.tif:0022-0961	4.186	429.975	153	872	204.215	155.029	0.525	1799.98	69226	3.551	0.282	0.847	0.81393
349	ARL13B_KAN582-11_5.tif:0023-0964	4.082	673.287	131	1607	81.491	155.461	0.508	2748.52	105706	4.11	0.243	0.844	1.24285
350	ARL13B_KAN582-11_5.tif:0024-0977	4.082	845.471	91	2505	153.069	157.472	0.326	3451.42	132739	5.505	0.182	0.704	1.56069
351	ARL13B_KAN582-11_6.tif:0001-0034	2.912	551.089	0	1398	210.745	5.418	0.473	1604.87	61722	3.639	0.275	0.786	0.725701
352	ARL13B_KAN582-11_6.tif:0002-0046	2.314	691.551	119	2107	138.839	7.587	0.366	1600.34	61548	5.412	0.185	0.757	0.723655
353	ARL13B_KAN582-11_6.tif:0003-0066	4.368	702.268	49	2379	92.23	10.435	0.377	3067.69	117981	4.94	0.202	0.753	1.38717
354	ARL13B_KAN582-11_6.tif:0004-0088	5.2	849.115	97	2427	119.105	14.214	0.494	4415.66	169823	3.841	0.26	0.855	1.99671
355	ARL13B_KAN582-11_6.tif:0005-0157	3.406	714.511	132	2154	191.493	25.26	0.49	2433.77	93601	2.59	0.386	0.749	1.10052
356	ARL13B_KAN582-11_6.tif:0006-0206	2.626	537.436	119	1546	65.481	33.233	0.586	1411.39	54281	2.282	0.438	0.757	0.638213
357	ARL13B_KAN582-11_6.tif:0007-0237	2.418	950.849	3	3068	159.574	38.264	0.578	2299.29	88429	3.27	0.306	0.857	1.03971
358	ARL13B_KAN582-11_6.tif:0008-0251	4.342	756.946	61	2210	143.386	40.449	0.5	3286.86	126410	3.327	0.301	0.768	1.48627
359	ARL13B_KAN582-11_6.tif:0009-0286	4.134	894.044	120	2739	214.506	46.205	0.552	3696.2	142153	3.196	0.313	0.791	1.67137
360	ARL13B_KAN582-11_6.tif:0010-0300	5.07	632.862	152	1846	110.591	48.308	0.518	3208.8	123408	3.599	0.278	0.853	1.45098
361	ARL13B_KAN582-11_6.tif:0011-0354	4.81	562.108	0	1501	59.803	56.986	0.544	2703.9	103990	2.418	0.414	0.751	1.22267
362	ARL13B_KAN582-11_6.tif:0012-0354	4.134	410.333	90	922	16.012	57.197	0.432	1696.42	65243	4.39	0.228	0.841	0.767099
363	ARL13B_KAN582-11_6.tif:0013-0364	4.446	613.018	110	2571	128.479	58.816	0.43	2725.64	104826	4.666	0.214	0.753	1.2325
364	ARL13B_KAN582-11_6.tif:0014-0362	3.718	845.58	111	2856	121.417	58.348	0.564	3144.06	120918	3.014	0.332	0.775	1.4217
365	ARL13B_KAN582-11_6.tif:0015-0408	3.978	915.83	27	3668	103.44	65.801	0.515	3643.39	140122	3.162	0.316	0.791	1.64749
366	ARL13B_KAN582-11_6.tif:0016-0433	3.51	1004.02	150	2858	199.636	69.877	0.449	3524.33	135543	4.205	0.238	0.742	1.59366
367	ARL13B_KAN582-11_6.tif:0017-0455	3.822	779.082	128	2317	181.395	73.378	0.408	2977.83	114525	4.618	0.217	0.768	1.34654
368	ARL13B_KAN582-11_6.tif:0018-0455	4.238	893.221	59	2812	220.616	73.284	0.475	3785.7	145595	4.039	0.248	0.842	1.71184
369	ARL13B_KAN582-11_6.tif:0019-0489	2.938	406.885	127	960	170.496	78.861	0.328	1195.5	45978	6.236	0.16	0.659	0.54059
370	ARL13B_KAN582-11_6.tif:0020-0513	4.264	547.11	150	1220	35.552	82.805	0.597	2333.02	89726	3.172	0.315	0.859	1.05496
371	ARL13B_KAN582-11_6.tif:0021-0525	4.628	717.635	148	2027	48.322	84.745	0.349	3321.41	127739	5.41	0.185	0.791	1.5019
372	ARL13B_KAN582-11_6.tif:0022-0596	4.212	624.809	27	1630	97.521	96.03	0.573	2631.85	101219	2.624	0.381	0.75	1.19009
373	ARL13B_KAN582-11_6.tif:0023-0619	3.666	932.986	46	3030	44.184	99.819	0.435	3420.53	131551	4.631	0.216	0.827	1.54672
374	ARL13B_KAN582-11_6.tif:0024-0718	3.302	510.819	68	1353	33.063	115.791	0.47	1686.83	64874	4.213	0.237	0.809	0.762761
375	ARL13B_KAN582-11_6.tif:0025-0729	2.938	460.496	12	1421	61.19	117.542	0.595	1353.02	52036	2.085	0.48	0.753	0.611817
376	ARL13B_KAN582-11_6.tif:0026-0759	4.004	632.89	113	1763	205.317	122.495	0.358	2534.24	97465	5.424	0.184	0.72	1.14595
377	ARL13B_KAN582-11_6.tif:0027-0828	4.524	485.897	79	1545	103.755	133.848	0.415	2198.33	84546	4.746	0.211	0.772	0.994056
378	ARL13B_KAN582-11_6.tif:0028-0849	5.226	866.831	71	2984	145.399	136.732	0.483	4530.33	174233	3.769	0.265	0.761	2.04856
379	ARL13B_KAN582-11_6.tif:0029-0939	3.718	441.154	131	926	118.094	151.468	0.491	1640.31	63085	3.003	0.333	0.763	0.741726
380	ARL13B_KAN582-11_6.tif:0030-0939	4.03	513.271	99	1189	31.264	151.746	0.374	2068.61	79557	3.945	0.253	0.668	0.935397
381	ARL13B_KAN582-11_6.tif:0031-0947	2.886	298	92	717	211.356	152.617	0.59	860.08	33078	2.944	0.34	0.81	0.388917
382	ARL13B_KAN582-11_6.tif:0032-0953	4.16	493.294	79	1219	138.923	153.451	0.317	2052.23	78927	5.66	0.177	0.741	0.92799
383	ARL13B_KAN582-11_6.tif:0033-0968	4.732	440.89	124	938	172.468	155.873	0.513	2086.42	80242	3.515	0.285	0.824	0.943451
384	ARL13B_KAN582-11_6.tif:0034-1018	3.432	688.705	101	2012	96.149	164.054	0.352	2363.78	90909	4.077	0.245	0.608	1.06887
										95498.1				1.12283
385	ARL13B_KAN582-12_1.tif:0001-0013	2.106	430.296	111	1077	7.948	2.067	0.463	906.259	34854	3.95	0.253	0.786	0.409798
386	ARL13B_KAN582-12_1.tif:0002-0085	1.56	272.983	118	528	35.128	13.945	0.588	425.88	16379	2.506	0.399	0.816	0.192577
387	ARL13B_KAN582-12_1.tif:0003-0104	2.6	349.17	91	823	177.831	16.775	0.524	907.897	34917	3.908	0.256	0.889	0.410539
388	ARL13B_KAN582-12_1.tif:0004-0101	2.626	300.277	117	541	130.114	16.241	0.569	788.575	30328	3.511	0.285	0.828	0.356584
389	ARL13B_KAN582-12_1.tif:0005-0111	2.132	700.11	78	2051	56.304	17.869	0.51	1492.72	57409	3.629	0.276	0.785	0.67499
390	ARL13B_KAN582-12_1.tif:0006-0118	3.38	474.708	141	1127	155.593	18.866	0.587	1604.61	61712	3.032	0.33	0.818	0.725583
391	ARL13B_KAN582-12_1.tif:0007-0356	3.016	402.129	151	840	36.38	57.39	0.545	1212.89	46647	3.195	0.313	0.784	0.548455
392	ARL13B_KAN582-12_1.tif:0008-0369	3.12	351.133	68	754	55.791	59.464	0.544	1095.6	42136	3.303	0.303	0.808	0.495417
393	ARL13B_KAN582-12_1.tif:0009-0406	2.392	420.543	133	1366	189.518	65.543	0.462	1006	38690	3.852	0.26	0.763	0.4549
394	ARL13B_KAN582-12_1.tif:0010-0443	3.276	291.365	30	914	85.355	71.379	0.352	954.569	36712	5.648	0.177	0.73	0.431644
395	ARL13B_KAN582-12_1.tif:0011-0568	2.21	528.188	95	1609	54.564	91.678	0.515	1167.37	44896	3.797	0.263	0.837	0.527868
396	ARL13B_KAN582-12_1.tif:0012-0627	3.12	922.333	1	3277	86.961	101.054	0.577	2877.85	110680	2.078	0.481	0.762	1.30133
397	ARL13B_KAN582-12_1.tif:0013-0652	3.64	518.55	108	1851	132.648	105.16	0.537	1887.64	72597	3.449	0.29	0.838	0.853564
398	ARL13B_KAN582-12_1.tif:0014-0714	4.108	819.658	152	2254	81.949	115.157	0.532	3367.36	129506	3.623	0.276	0.861	1.52268
399	ARL13B_KAN582-12_1.tif:0015-0725	4.654	875.872	28	3365	151.059	116.869	0.394	4076.55	156781	4.584	0.218	0.757	1.84336
400	ARL13B_KAN582-12_1.tif:0016-0784	3.666	439.035	70	1368	108.421	126.565	0.411	1609.6	61904	4.38	0.228	0.731	0.727841
401	ARL13B_KAN582-12_1.tif:0017-0786	2.99	813.783	40	2454	50.26	126.798	0.527	2433.36	93585	3.898	0.257	0.881	1.10033
402	ARL13B_KAN582-12_1.tif:0018-0795	2.34	762.3	117	2012	5.289	128.378	0.515	1783.89	68607	3.288	0.304	0.807	0.806652
403	ARL13B_KAN582-12_1.tif:0019-0808	2.6	388.89	75	1120	169.772	130.208	0.537	1011.17	38889	3.759	0.266	0.866	0.45724
404	ARL13B_KAN582-12_1.tif:0020-0828	2.782	515.29	98	1664	32.407	133.487	0.505	1433.62	55136	3.608	0.277	0.762	0.648265
405	ARL13B_KAN582-12_1.tif:0021-0840	2.938	798.637	153	2265	62.599	135.436	0.515	2346.54	90246	4.046	0.247	0.85	1.06107
406	ARL13B_KAN582-12_1.tif:0022-0885	2.392	379.065	89	890	9.465	142.908	0.373	906.779	34874	4.606	0.217	0.641	0.410034
407	ARL13B_KAN582-12_1.tif:0023-0894	3.302	771.228	144	1982	136.83	144.166	0.431	2546.75	97946	4.878	0.205	0.784	1.15161
408	ARL13B_KAN582-12_1.tif:0024-0940	2.548	463.643	46	1304	196.761	151.651	0.37	1181.43	45437	3.458	0.289	0.653	0.534229
409	ARL13B_KAN582-12_1.tif:0025-1005	1.976	329.447	61	1413	58.167	162.075	0.54	651.027	25038	2.943	0.34	0.727	0.294386
410	ARL13B_KAN582-12_1.tif:0026-1012	1.43	443.964	153	993	5.384	163.26	0.484	634.906	24418	3.841	0.26	0.786	0.287096
411	ARL13B_KAN582-12_2.tif:0001-0008	2.574	729.333	118	2521	146.181	1.244	0.572	1877.42	72204	3.173	0.315	0.839	0.848944
412	ARL13B_KAN582-12_2.tif:0002-0021	0.546	217.667	154	325	2.284	3.375	0.476	118.853	4571	3.89	0.257	0.724	0.0537439
413	ARL13B_KAN582-12_2.tif:0003-0048	0.962	158.351	101	240	98.504	7.655	0.428	152.343	5859	3.643	0.275	0.692	0.0688876
414	ARL13B_KAN582-12_2.tif:0004-0062	3.38	450.992	120	1149	163.53	10.259	0.433	1524.45	58629	4.139	0.242	0.812	0.689335
415	ARL13B_KAN582-12_2.tif:0005-0131	4.108	715.051	155	2088	214.506	21.265	0.308	2937.61	112978	6.491	0.154	0.745	1.32835
416	ARL13B_KAN582-12_2.tif:0006-0194	2.366	711.253	121	2173	33.381	31.321	0.583	1682.92	64724	2.847	0.351	0.768	0.760997
417	ARL13B_KAN582-12_2.tif:0007-0255	2.834	518	0	2206	80.062	41.074	0.463	1468.1	56462	4.274	0.234	0.82	0.663856
418	ARL13B_KAN582-12_2.tif:0008-0265	4.004	481.825	48	974	12.587	42.586	0.418	1929.34	74201	4.243	0.236	0.804	0.872424
419	ARL13B_KAN582-12_2.tif:0009-0290	1.872	264.986	135	501	111.775	46.861	0.591	496.084	19079	1.977	0.506	0.724	0.224323
420	ARL13B_KAN582-12_2.tif:0010-0325	2.444	385.979	62	1040	198.784	52.216	0.566	943.389	36282	2.523	0.396	0.718	0.426588
421	ARL13B_KAN582-12_2.tif:0011-0325	3.51	761.119	8	2660	64.836	52.332	0.467	2671.69	102751	3.126	0.32	0.711	1.2081
422	ARL13B_KAN582-12_2.tif:0012-0387	2.444	390.245	162	740	136.977	62.436	0.584	953.815	36683	3.37	0.297	0.847	0.431303
423	ARL13B_KAN582-12_2.tif:0013-0426	2.938	633.071	88	2233	185.638	68.825	0.549	1860.07	71537	2.829	0.354	0.793	0.841101
424	ARL13B_KAN582-12_2.tif:0014-0443	3.38	324.269	151	597	44.732	71.47	0.527	1096.1	42155	3.565	0.281	0.831	0.49564
425	ARL13B_KAN582-12_2.tif:0015-0514	4.368	342.542	91	697	97.39	83.016	0.385	1496.31	57547	5.67	0.176	0.838	0.676613
426	ARL13B_KAN582-12_2.tif:0016-0521	3.588	333.275	45	1067	141.471	84.215	0.464	1195.86	45992	3.614	0.277	0.723	0.540754
427	ARL13B_KAN582-12_2.tif:0017-0536	3.874	341.423	132	724	80.512	86.46	0.388	1322.75	50872	4.305	0.232	0.676	0.598131
428	ARL13B_KAN582-12_2.tif:0018-0614	5.278	508.576	84	1188	36.387	99.233	0.455	2684.43	103241	3.727	0.268	0.76	1.21386
429	ARL13B_KAN582-12_2.tif:0019-0644	3.328	410.562	132	863	8.942	103.849	0.458	1366.43	52552	4.503	0.222	0.8	0.617884
430	ARL13B_KAN582-12_2.tif:0020-0821	3.302	1059.6	71	3197	192.438	132.436	0.436	3499.01	134569	3.773	0.265	0.784	1.5822
431	ARL13B_KAN582-12_2.tif:0021-0826	2.808	457.759	0	1624	89.592	133.155	0.594	1285.46	49438	3.363	0.297	0.837	0.581271
432	ARL13B_KAN582-12_2.tif:0022-0832	2.262	395.437	30	934	159.842	134.035	0.401	894.532	34403	4.202	0.238	0.677	0.404496
433	ARL13B_KAN582-12_2.tif:0023-0853	3.276	917.198	110	3494	135.221	137.668	0.515	3004.92	115567	3.533	0.283	0.805	1.35879
434	ARL13B_KAN582-12_2.tif:0024-0882	3.302	672.291	44	1742	123.14	142.108	0.466	2220.04	85381	3.114	0.321	0.711	1.00387
435	ARL13B_KAN582-12_2.tif:0025-0945	1.846	322.324	93	892	145.038	152.432	0.448	595.046	22885	4.614	0.217	0.763	0.269072
436	ARL13B_KAN582-12_2.tif:0026-0992	4.212	414.346	65	1310	54.795	160.139	0.383	1745.33	67124	5.506	0.182	0.764	0.789215
437	ARL13B_KAN582-12_2.tif:0027-0999	2.574	570.788	154	1968	75.588	161.265	0.516	1469.3	56508	3.042	0.329	0.717	0.664397
438	ARL13B_KAN582-12_3.tif:0001-0011	1.768	273.265	103	639	124.089	1.954	0.458	483.161	18582	2.222	0.45	0.705	0.218479
439	ARL13B_KAN582-12_3.tif:0002-0031	2.08	410.913	154	724	23.395	4.973	0.436	854.749	32873	4.606	0.217	0.808	0.386507
440	ARL13B_KAN582-12_3.tif:0003-0081	1.924	283.851	66	720	72.584	13.011	0.419	546.163	21005	4.149	0.241	0.658	0.246968
441	ARL13B_KAN582-12_3.tif:0004-0092	2.496	526.396	75	1418	124.942	14.882	0.349	1313.96	50534	5.935	0.168	0.706	0.594157
442	ARL13B_KAN582-12_3.tif:0005-0146	3.796	879.39	37	2970	103.65	23.675	0.378	3338.37	128391	4.346	0.23	0.712	1.50957
443	ARL13B_KAN582-12_3.tif:0006-0170	2.184	404.06	153	856	26.898	27.453	0.519	882.519	33941	3.789	0.264	0.785	0.399064
444	ARL13B_KAN582-12_3.tif:0007-0172	3.822	722.156	61	1990	116.962	28.009	0.371	2760.25	106157	5.286	0.189	0.741	1.24815
445	ARL13B_KAN582-12_3.tif:0008-0192	3.562	466.54	74	1147	168.013	31.251	0.434	1661.92	63916	3.934	0.254	0.781	0.751497
446	ARL13B_KAN582-12_3.tif:0009-0190	1.508	413.034	144	1153	191.301	30.721	0.513	622.894	23956	3.735	0.268	0.682	0.281664
447	ARL13B_KAN582-12_3.tif:0010-0248	2.236	434.349	62	1237	89.616	40.037	0.512	971.262	37354	3.422	0.292	0.723	0.439192
448	ARL13B_KAN582-12_3.tif:0011-0287	1.612	437.403	120	1056	25.68	46.307	0.538	705.136	27119	3.244	0.308	0.743	0.318854
449	ARL13B_KAN582-12_3.tif:0012-0308	2.496	710.708	115	2413	184.618	49.683	0.502	1774.04	68228	4.337	0.231	0.81	0.802196
450	ARL13B_KAN582-12_3.tif:0013-0327	1.43	493.527	152	935	1.851	52.789	0.472	705.787	27144	4.192	0.239	0.764	0.319148
451	ARL13B_KAN582-12_3.tif:0014-0358	2.444	544.223	81	1636	208.832	57.86	0.359	1330.16	51157	4.919	0.203	0.704	0.601482
452	ARL13B_KAN582-12_3.tif:0015-0422	1.066	520.122	78	1577	85.205	67.703	0.474	554.483	21325	1.818	0.55	0.661	0.25073
453	ARL13B_KAN582-12_3.tif:0016-0431	1.82	370.886	48	1139	25.438	69.319	0.44	675.053	25962	4.364	0.229	0.848	0.30525
454	ARL13B_KAN582-12_3.tif:0017-0497	3.016	655.56	152	2703	59.247	80.205	0.442	1977.29	76045	4.566	0.219	0.795	0.894104
455	ARL13B_KAN582-12_3.tif:0018-0522	3.51	565.289	27	1624	165.92	84.321	0.463	1984.28	76314	3.218	0.311	0.754	0.897267
456	ARL13B_KAN582-12_3.tif:0019-0569	2.496	375.198	142	811	31.434	92.114	0.437	936.55	36019	3.621	0.276	0.736	0.423496
457	ARL13B_KAN582-12_3.tif:0020-0575	4.55	741.983	78	2353	136.463	92.765	0.462	3376.22	129847	3.683	0.272	0.735	1.52669
458	ARL13B_KAN582-12_3.tif:0021-0615	2.938	881.947	67	2440	103.867	99.05	0.554	2591.32	99660	3.522	0.284	0.822	1.17176
459	ARL13B_KAN582-12_3.tif:0022-0618	2.028	606.962	111	1508	15.193	99.686	0.368	1230.99	47343	5.198	0.192	0.719	0.556639
460	ARL13B_KAN582-12_3.tif:0023-0648	1.898	591.712	140	1613	174.259	104.577	0.424	1123.14	43195	4.619	0.216	0.768	0.507868
461	ARL13B_KAN582-12_3.tif:0024-0650	1.534	647.186	150	2128	50.885	104.819	0.457	992.844	38184	4.582	0.218	0.761	0.448951
462	ARL13B_KAN582-12_3.tif:0025-0665	4.03	1131.22	155	3113	153.721	107.395	0.423	4559.09	175339	4.096	0.244	0.767	2.06156
463	ARL13B_KAN582-12_3.tif:0026-0763	1.95	604.04	100	1565	22.23	122.998	0.47	1177.95	45303	4.869	0.205	0.777	0.532653
464	ARL13B_KAN582-12_3.tif:0027-0767	0.598	157.522	94	210	4.89	123.78	0.24	94.204	3623	7.033	0.142	0.582	0.0425977
465	ARL13B_KAN582-12_3.tif:0028-0770	1.456	303.054	130	720	100.128	124.214	0.587	441.273	16971	2.905	0.344	0.747	0.199538
466	ARL13B_KAN582-12_3.tif:0029-0798	1.534	315.169	27	848	38.04	128.958	0.417	483.499	18595	3.263	0.306	0.674	0.218632
467	ARL13B_KAN582-12_3.tif:0030-0944	3.328	557.641	127	1550	80.902	152.104	0.47	1855.94	71378	4.078	0.245	0.78	0.839232
468	ARL13B_KAN582-12_3.tif:0031-0974	2.756	761.792	112	2097	130.193	156.886	0.464	2099.63	80750	3.586	0.279	0.746	0.949424
469	ARL13B_KAN582-12_3.tif:0032-0983	1.508	199.276	150	279	160.138	158.459	0.591	300.526	11558	3.14	0.318	0.768	0.135894
470	ARL13B_KAN582-12_4.tif:0001-0060	1.378	421.132	41	776	1.909	9.731	0.563	580.355	22320	3.607	0.277	0.803	0.262429
471	ARL13B_KAN582-12_4.tif:0002-0074	1.742	438.851	150	1162	76.792	11.953	0.49	764.524	29403	3.78	0.265	0.736	0.345708
472	ARL13B_KAN582-12_4.tif:0003-0131	2.73	926.61	52	2257	117.374	21.143	0.498	2529.8	97294	3.327	0.301	0.805	1.14394
473	ARL13B_KAN582-12_4.tif:0004-0155	2.236	613.942	156	1825	164.121	25.082	0.557	1372.86	52799	3.394	0.295	0.804	0.620788
474	ARL13B_KAN582-12_4.tif:0005-0260	2.574	210.424	70	358	221.068	42.03	0.509	541.665	20832	3.139	0.319	0.717	0.244934
475	ARL13B_KAN582-12_4.tif:0006-0265	3.042	662.274	108	2143	68.365	42.773	0.581	2014.76	77486	3.21	0.312	0.815	0.911047
476	ARL13B_KAN582-12_4.tif:0007-0267	2.08	518.025	116	1631	201.163	42.866	0.513	1077.56	41442	3.14	0.318	0.696	0.487257
477	ARL13B_KAN582-12_4.tif:0008-0328	4.056	853.558	117	2598	167.173	53.124	0.375	3462.24	133155	4.99	0.2	0.734	1.56558
478	ARL13B_KAN582-12_4.tif:0009-0377	1.352	377.769	146	740	11.669	61.011	0.455	510.775	19644	4.446	0.225	0.889	0.230966
479	ARL13B_KAN582-12_4.tif:0010-0515	4.03	764.742	55	2600	157.693	83.198	0.44	3082.1	118535	3.08	0.325	0.692	1.39368
480	ARL13B_KAN582-12_4.tif:0011-0775	3.016	446.44	62	1224	32.233	125.042	0.484	1346.54	51787	3.206	0.312	0.766	0.608889
481	ARL13B_KAN582-12_4.tif:0012-0787	2.834	836.917	45	2411	93.893	126.768	0.421	2371.97	91224	4.102	0.244	0.729	1.07257
482	ARL13B_KAN582-12_4.tif:0013-0786	1.274	431.714	159	861	176.669	126.866	0.596	550.037	21154	3.294	0.304	0.852	0.24872
483	ARL13B_KAN582-12_4.tif:0014-0837	3.458	405.128	151	823	1.098	134.928	0.473	1401.02	53882	3.939	0.254	0.813	0.633521
484	ARL13B_KAN582-12_4.tif:0015-0839	2.886	545.604	77	1489	150.541	135.221	0.437	1574.71	60562	3.391	0.295	0.681	0.712062
485	ARL13B_KAN582-12_4.tif:0016-0886	2.522	399.639	150	867	209.082	142.838	0.489	1007.95	38765	3.26	0.307	0.711	0.455782
486	ARL13B_KAN582-12_4.tif:0017-0905	3.666	733.943	80	2240	142.398	145.982	0.551	2690.8	103486	4.123	0.243	0.972	1.21674
487	ARL13B_KAN582-12_4.tif:0018-0921	2.418	581.656	136	2051	153.755	148.644	0.462	1406.53	54094	3.834	0.261	0.772	0.636014
488	ARL13B_KAN582-12_4.tif:0019-0979	1.352	306.442	74	522	53.095	158.059	0.394	414.335	15935	5.41	0.185	0.748	0.187357
489	ARL13B_KAN582-12_4.tif:0020-0997	3.276	254.865	107	502	168.277	160.793	0.549	834.988	32113	2.936	0.341	0.829	0.377571
490	ARL13B_KAN582-12_5.tif:0001-0006	1.898	763.452	87	3028	85.006	0.962	0.586	1449.12	55732	3.054	0.327	0.811	0.655273
491	ARL13B_KAN582-12_5.tif:0002-0024	4.212	491.302	44	1900	194.98	3.931	0.462	2069.49	79591	4.789	0.209	0.862	0.935797
492	ARL13B_KAN582-12_5.tif:0003-0024	1.924	276.5	126	499	21.692	4.258	0.419	532.018	20461	3.161	0.316	0.622	0.240572
493	ARL13B_KAN582-12_5.tif:0004-0088	1.716	168.455	89	224	63.989	14.09	0.363	289.085	11118	5.178	0.193	0.706	0.130721
494	ARL13B_KAN582-12_5.tif:0005-0092	4.082	460.752	104	1404	58.968	14.917	0.485	1880.9	72338	4.301	0.233	0.91	0.850519
495	ARL13B_KAN582-12_5.tif:0006-0121	3.562	474.774	141	1183	191.477	19.507	0.457	1691.25	65044	4.192	0.239	0.787	0.764759
496	ARL13B_KAN582-12_5.tif:0007-0133	4.368	336.339	135	597	18.521	21.586	0.363	1469.22	56505	5.925	0.169	0.796	0.664362
497	ARL13B_KAN582-12_5.tif:0008-0133	3.978	657.621	83	1644	153.437	21.515	0.477	2616.17	100616	3.658	0.273	0.829	1.183
498	ARL13B_KAN582-12_5.tif:0009-0135	2.99	427.243	152	898	126.611	21.844	0.585	1277.54	49133	3.217	0.311	0.852	0.577685
499	ARL13B_KAN582-12_5.tif:0010-0223	4.836	511.914	150	1254	65.681	35.817	0.522	2475.76	95216	3.445	0.29	0.836	1.11951
500	ARL13B_KAN582-12_5.tif:0011-0244	4.16	627.519	112	1827	88.101	39.459	0.361	2610.64	100403	5.177	0.193	0.753	1.1805
501	ARL13B_KAN582-12_5.tif:0012-0278	3.978	531.549	127	1333	137.786	44.632	0.419	2114.63	81327	4.266	0.234	0.785	0.956208
502	ARL13B_KAN582-12_5.tif:0013-0282	1.274	251.041	134	426	14.307	45.504	0.528	319.845	12301	3.722	0.269	0.803	0.14463
503	ARL13B_KAN582-12_5.tif:0014-0349	2.34	383.833	95	987	155.23	56.061	0.568	898.224	34545	2.066	0.484	0.744	0.406165
504	ARL13B_KAN582-12_5.tif:0015-0403	2.366	511.857	109	1359	79.435	65.142	0.556	1211.13	46579	3.428	0.292	0.802	0.547656
505	ARL13B_KAN582-12_5.tif:0016-0412	1.43	176.327	51	272	99.68	66.231	0.436	252.163	9698	3.208	0.312	0.667	0.114025
506	ARL13B_KAN582-12_5.tif:0017-0463	5.278	839.852	108	2262	165.673	74.587	0.434	4433.01	170490	4.911	0.204	0.81	2.00455
507	ARL13B_KAN582-12_5.tif:0018-0489	1.092	223.476	142	421	13.725	79.074	0.426	244.051	9386	2.886	0.346	0.609	0.110357
508	ARL13B_KAN582-12_5.tif:0019-0514	2.028	299.769	56	1033	186.711	83.263	0.363	607.969	23382	3.97	0.252	0.6	0.274916
509	ARL13B_KAN582-12_5.tif:0020-0523	3.276	781.389	150	2527	131.731	84.28	0.539	2559.98	98455	3.132	0.319	0.754	1.15759
510	ARL13B_KAN582-12_5.tif:0021-0569	3.926	692.119	72	1985	18.491	92.005	0.549	2717.42	104510	2.915	0.343	0.814	1.22878
511	ARL13B_KAN582-12_5.tif:0022-0572	3.874	748.309	51	2279	146.273	92.032	0.461	2899.12	111498	3.25	0.308	0.736	1.31095
512	ARL13B_KAN582-12_5.tif:0023-0570	0.364	197.286	148	280	189.86	91.936	0.535	71.816	2762	3.085	0.324	0.651	0.0324744
513	ARL13B_KAN582-12_5.tif:0024-0613	2.73	361.848	69	927	40.819	98.818	0.422	987.903	37994	2.712	0.369	0.61	0.446717
514	ARL13B_KAN582-12_5.tif:0025-0676	4.368	968.952	41	3203	167.387	108.607	0.461	4232.64	162784	1.452	0.689	0.66	1.91394
515	ARL13B_KAN582-12_5.tif:0026-0675	1.664	344.203	68	896	190.225	108.798	0.546	572.788	22029	3.681	0.272	0.805	0.259008
516	ARL13B_KAN582-12_5.tif:0027-0703	2.262	409.713	83	1281	122.026	113.202	0.421	926.826	35645	4.425	0.226	0.791	0.419099
517	ARL13B_KAN582-12_5.tif:0028-0812	2.574	922.909	115	2728	193.25	131.143	0.514	2375.71	91368	3.121	0.32	0.795	1.07427
518	ARL13B_KAN582-12_5.tif:0029-0841	1.898	435.781	155	1003	50.927	135.579	0.488	827.162	31812	3.784	0.264	0.76	0.374032
519	ARL13B_KAN582-12_5.tif:0030-0850	4.03	721.013	80	2075	167.035	137.06	0.39	2905.86	111757	4.767	0.21	0.716	1.31399
520	ARL13B_KAN582-12_5.tif:0031-0889	3.354	479.612	151	1369	100.796	143.318	0.429	1608.72	61870	4.902	0.204	0.735	0.727441
521	ARL13B_KAN582-12_5.tif:0032-0895	3.666	356.723	80	809	193.963	144.371	0.403	1307.83	50298	4.822	0.207	0.766	0.591382
522	ARL13B_KAN582-12_5.tif:0033-0939	3.822	742.83	136	1961	126.034	151.35	0.389	2839.27	109196	5.411	0.185	0.78	1.28388
523	ARL13B_KAN582-12_5.tif:0034-0950	2.86	698.836	23	1873	214.716	153.19	0.42	1998.79	76872	3.987	0.251	0.712	0.903828
524	ARL13B_KAN582-12_5.tif:0035-1010	3.042	586.051	69	1680	187.544	163.193	0.336	1782.88	68568	3.506	0.285	0.555	0.806193
525	ARL13B_KAN582-12_6.tif:0001-0042	3.25	467.08	75	1300	24.489	6.722	0.441	1518.1	58385	4.188	0.239	0.714	0.686466
526	ARL13B_KAN582-12_6.tif:0002-0058	2.99	491.47	115	1431	125.341	9.373	0.484	1469.58	56519	3.912	0.256	0.764	0.664526
527	ARL13B_KAN582-12_6.tif:0003-0110	4.602	735.401	150	1748	42.928	17.67	0.511	3384.52	130166	4.188	0.239	0.833	1.53044
528	ARL13B_KAN582-12_6.tif:0004-0157	2.184	311.881	68	776	68.702	25.289	0.365	681.189	26198	6.032	0.166	0.724	0.308025
529	ARL13B_KAN582-12_6.tif:0005-0169	2.756	546.821	134	1855	153.937	27.25	0.477	1507.13	57963	4.325	0.231	0.803	0.681504
530	ARL13B_KAN582-12_6.tif:0006-0196	2.106	246.938	17	551	199.666	31.409	0.321	520.083	20002	4.331	0.231	0.572	0.235175
531	ARL13B_KAN582-12_6.tif:0007-0236	2.444	526.947	53	1766	39.384	38.167	0.563	1287.94	49533	3.352	0.298	0.814	0.582388
532	ARL13B_KAN582-12_6.tif:0008-0321	3.848	571.061	19	2269	145.266	51.642	0.58	2197.57	84517	2.34	0.427	0.753	0.993715
533	ARL13B_KAN582-12_6.tif:0009-0359	2.704	360.192	153	683	1.834	57.906	0.372	974.019	37460	5.939	0.168	0.717	0.440439
534	ARL13B_KAN582-12_6.tif:0010-0369	3.406	714.893	128	2213	176.977	59.225	0.403	2435.07	93651	3.984	0.251	0.679	1.10111
535	ARL13B_KAN582-12_6.tif:0011-0451	2.808	180.833	89	263	113.124	72.6	0.375	507.811	19530	5.609	0.178	0.783	0.229625
536	ARL13B_KAN582-12_6.tif:0012-0484	2.704	380.5	80	926	207.642	77.882	0.354	1028.93	39572	3.474	0.288	0.576	0.465271
537	ARL13B_KAN582-12_6.tif:0013-0493	1.482	210.088	100	398	77.676	79.376	0.452	311.369	11975	2.932	0.341	0.675	0.140797
538	ARL13B_KAN582-12_6.tif:0014-0624	3.796	856.637	26	2640	100.915	100.799	0.48	3251.99	125069	3.81	0.262	0.762	1.47051
539	ARL13B_KAN582-12_6.tif:0015-0631	1.768	312.441	109	820	123.551	101.663	0.443	552.429	21246	3.354	0.298	0.673	0.249801
540	ARL13B_KAN582-12_6.tif:0016-0643	2.6	553.44	60	1817	185.471	103.701	0.531	1439.03	55344	3.369	0.297	0.787	0.650711
541	ARL13B_KAN582-12_6.tif:0017-0659	1.95	452.427	112	1167	142.894	106.252	0.539	882.285	33932	3.506	0.285	0.794	0.398958
542	ARL13B_KAN582-12_6.tif:0018-0680	2.34	568.122	66	1650	28.09	109.675	0.406	1329.49	51131	4.558	0.219	0.706	0.601176
543	ARL13B_KAN582-12_6.tif:0019-0750	2.834	1056.52	59	3887	140.594	121.068	0.588	2994.37	115161	2.248	0.445	0.784	1.35401
544	ARL13B_KAN582-12_6.tif:0020-0762	2.808	563.111	122	2013	84.574	123.064	0.487	1581.31	60816	3.612	0.277	0.72	0.715048
545	ARL13B_KAN582-12_6.tif:0021-0757	2.34	774.111	119	1871	16.152	122.075	0.488	1811.53	69670	4.418	0.226	0.87	0.81915
546	ARL13B_KAN582-12_6.tif:0022-0871	1.066	802.683	56	2369	124.656	140.384	0.529	855.712	32910	2.347	0.426	0.695	0.386942
547	ARL13B_KAN582-12_6.tif:0023-0941	2.678	632.476	112	1550	77.495	151.833	0.447	1693.87	65145	4.623	0.216	0.769	0.765947
548	ARL13B_KAN582-12_6.tif:0024-1023	1.17	203.289	134	319	94.602	164.975	0.488	237.862	9148	3.146	0.318	0.667	0.107558
										58686.1				0.690006
549	ARL13B_KAN582-13_1.tif:0001-0012	2.886	925.748	151	3495	87.676	1.891	0.529	2671.87	102758	3.354	0.298	0.796	1.20818
550	ARL13B_KAN582-13_1.tif:0002-0022	0.832	121.531	34	181	114.498	3.86	0.404	101.12	3889	1.821	0.549	0.598	0.0457252
551	ARL13B_KAN582-13_1.tif:0003-0084	2.886	699.468	119	1983	202.769	13.652	0.45	2018.79	77641	3.521	0.284	0.696	0.91287
552	ARL13B_KAN582-13_1.tif:0004-0107	4.082	974.439	131	2707	142.715	17.411	0.429	3977.9	152987	4.161	0.24	0.742	1.79876
553	ARL13B_KAN582-13_1.tif:0005-0125	3.302	887.409	80	2917	215.574	19.998	0.364	2930.4	112701	4.618	0.217	0.711	1.32509
554	ARL13B_KAN582-13_1.tif:0006-0135	4.238	632.724	128	1928	118.887	21.998	0.428	2681.64	103134	4.537	0.22	0.799	1.21261
555	ARL13B_KAN582-13_1.tif:0007-0172	5.33	816.585	5	2724	178.196	28.034	0.32	4352.66	167400	6.509	0.154	0.747	1.96822
556	ARL13B_KAN582-13_1.tif:0008-0205	3.458	473.767	150	1222	52.798	33.105	0.567	1638.38	63011	3.365	0.297	0.85	0.740856
557	ARL13B_KAN582-13_1.tif:0009-0242	4.16	876.231	139	2567	96.619	38.998	0.487	3645.34	140197	3.717	0.269	0.755	1.64838
558	ARL13B_KAN582-13_1.tif:0010-0273	4.446	954.164	157	3045	121.227	44.119	0.512	4242.47	163162	3.778	0.265	0.838	1.91839
559	ARL13B_KAN582-13_1.tif:0011-0288	2.808	300.454	145	655	45.477	46.543	0.423	843.725	32449	4.669	0.214	0.769	0.381521
560	ARL13B_KAN582-13_1.tif:0012-0327	2.47	515.674	102	1240	2.803	52.721	0.514	1273.79	48989	3.999	0.25	0.776	0.575992
561	ARL13B_KAN582-13_1.tif:0013-0378	2.288	536.489	81	1875	25.758	61.13	0.468	1227.56	47211	3.719	0.269	0.715	0.555087
562	ARL13B_KAN582-13_1.tif:0014-0413	3.536	843.037	140	2687	185.926	66.592	0.343	2981.16	114653	5.8	0.172	0.716	1.34804
563	ARL13B_KAN582-13_1.tif:0015-0455	2.496	518.406	155	1237	222.379	73.453	0.416	1294.02	49767	5.114	0.196	0.73	0.585139
564	ARL13B_KAN582-13_1.tif:0016-0488	3.614	562.468	150	1630	131.416	78.633	0.318	2032.88	78183	6.276	0.159	0.68	0.919242
565	ARL13B_KAN582-13_1.tif:0017-0513	4.94	521.705	74	1510	65.05	82.837	0.455	2577.38	99124	3.96	0.253	0.741	1.16546
566	ARL13B_KAN582-13_1.tif:0018-0554	3.744	442.521	150	1298	25.222	89.256	0.486	1656.9	63723	4.166	0.24	0.811	0.749228
567	ARL13B_KAN582-13_1.tif:0019-0571	3.588	837.42	65	2757	107.772	92.119	0.457	3004.84	115564	4.14	0.242	0.773	1.35875
568	ARL13B_KAN582-13_1.tif:0020-0570	3.562	958.613	104	3044	159.124	91.991	0.426	3414.79	131330	3.629	0.276	0.673	1.54412
569	ARL13B_KAN582-13_1.tif:0021-0584	5.486	670.427	46	2561	88.1	94.085	0.293	3678.18	141460	7.24	0.138	0.756	1.66323
570	ARL13B_KAN582-13_1.tif:0022-0613	4.29	532.188	40	1744	127.049	98.872	0.308	2283.22	87811	6.559	0.152	0.711	1.03244
571	ARL13B_KAN582-13_1.tif:0023-0618	3.354	267.109	111	613	148.668	99.429	0.593	895.936	34457	2.227	0.449	0.772	0.405131
572	ARL13B_KAN582-13_1.tif:0024-0630	2.886	506.865	95	1516	200.487	101.815	0.331	1462.9	56262	5.523	0.181	0.634	0.661504
573	ARL13B_KAN582-13_1.tif:0025-0730	2.08	313.625	34	840	196.544	117.733	0.405	652.379	25090	4.03	0.248	0.727	0.294997
574	ARL13B_KAN582-13_1.tif:0026-0733	3.874	833.114	72	2637	45.695	118.279	0.54	3227.68	124134	3.643	0.274	0.83	1.45951
575	ARL13B_KAN582-13_1.tif:0027-0798	3.978	870.745	104	2528	166.225	128.588	0.354	3464.03	133224	4.758	0.21	0.668	1.56639
576	ARL13B_KAN582-13_1.tif:0028-0801	2.86	851.682	136	2257	186.097	129.24	0.463	2435.96	93685	3.745	0.267	0.783	1.10151
577	ARL13B_KAN582-13_1.tif:0029-0827	2.938	750.08	108	2109	218.086	133.607	0.389	2203.87	84759	5.06	0.198	0.731	0.99656
578	ARL13B_KAN582-13_1.tif:0030-0839	0.728	151.821	63	259	117.753	135.248	0.502	110.533	4251	4.206	0.238	0.875	0.0499814
579	ARL13B_KAN582-13_1.tif:0031-0860	2.418	167.613	40	254	118.643	138.426	0.364	405.312	15588	4.274	0.234	0.705	0.183277
580	ARL13B_KAN582-13_1.tif:0032-0863	3.744	798.229	130	2707	130.548	139.092	0.382	2988.75	114945	5.582	0.179	0.783	1.35147
581	ARL13B_KAN582-13_1.tif:0033-0866	3.328	374.867	49	724	8.36	139.99	0.367	1247.63	47983	4.54	0.22	0.764	0.564164
582	ARL13B_KAN582-13_1.tif:0034-0881	4.784	582.25	113	1854	99.358	141.846	0.307	2785.65	107134	5.785	0.173	0.628	1.25964
583	ARL13B_KAN582-13_1.tif:0035-0876	2.652	493.176	107	1366	155.483	141.448	0.405	1307.98	50304	2.872	0.348	0.596	0.591453
584	ARL13B_KAN582-13_1.tif:0036-0881	2.782	436.598	129	1098	160.687	142.335	0.304	1214.69	46716	6.511	0.154	0.631	0.549267
585	ARL13B_KAN582-13_1.tif:0037-0894	3.224	407.032	39	1036	56.545	144.312	0.341	1312.35	50472	6.977	0.143	0.832	0.593428
586	ARL13B_KAN582-13_1.tif:0038-1025	2.912	1000.42	144	2609	113.912	165.474	0.476	2913.4	112047	4.434	0.226	0.839	1.3174
587	ARL13B_KAN582-13_2.tif:0001-0043	3.692	468.401	93	1504	60.57	6.934	0.424	1729.44	66513	4.787	0.209	0.798	0.782031
588	ARL13B_KAN582-13_2.tif:0002-0043	3.692	658.648	46	1977	179.604	7.217	0.424	2431.87	93528	2.278	0.439	0.62	1.09966
589	ARL13B_KAN582-13_2.tif:0003-0042	1.144	456.591	156	1027	197.971	6.908	0.595	522.371	20090	3.61	0.277	0.917	0.23621
590	ARL13B_KAN582-13_2.tif:0004-0068	2.626	438.366	116	1620	37.032	11.003	0.346	1151.22	44275	5.604	0.178	0.678	0.520566
591	ARL13B_KAN582-13_2.tif:0005-0081	2.886	690.36	147	1587	223.374	13.415	0.387	1992.5	76630	4.525	0.221	0.828	0.900983
592	ARL13B_KAN582-13_2.tif:0006-0103	4.29	329.448	133	766	212.046	16.541	0.419	1413.42	54359	4.386	0.228	0.791	0.63913
593	ARL13B_KAN582-13_2.tif:0007-0111	3.718	744.608	32	2592	141.938	18.026	0.476	2768.62	106479	3.481	0.287	0.759	1.25193
594	ARL13B_KAN582-13_2.tif:0008-0156	3.9	356.947	123	739	3.995	25.204	0.43	1392.18	53542	4.508	0.222	0.826	0.629524
595	ARL13B_KAN582-13_2.tif:0009-0186	3.874	718.195	0	2259	171.403	29.856	0.581	2782.45	107011	2.342	0.427	0.766	1.25819
596	ARL13B_KAN582-13_2.tif:0010-0215	4.082	816.898	138	2514	185.445	34.743	0.359	3334.78	128253	3.67	0.273	0.628	1.50794
597	ARL13B_KAN582-13_2.tif:0011-0287	5.096	774.332	85	2832	92.079	46.206	0.466	3946.23	151769	3.773	0.265	0.77	1.78443
598	ARL13B_KAN582-13_2.tif:0012-0294	0.754	233.897	141	426	111.882	47.421	0.584	176.369	6783	2.808	0.356	0.699	0.0797516
599	ARL13B_KAN582-13_2.tif:0013-0329	3.38	871.823	100	3752	145.13	53.004	0.491	2946.94	113337	3.808	0.263	0.76	1.33257
600	ARL13B_KAN582-13_2.tif:0014-0349	2.626	546.653	134	2233	47.327	56.339	0.511	1435.6	55212	4.004	0.25	0.735	0.649159
601	ARL13B_KAN582-13_2.tif:0015-0363	4.212	578.858	37	1759	175.01	58.463	0.331	2438.3	93775	4.398	0.227	0.607	1.10257
602	ARL13B_KAN582-13_2.tif:0016-0408	2.366	349.879	88	1119	112.059	65.864	0.599	827.864	31839	2.62	0.382	0.771	0.374349
603	ARL13B_KAN582-13_2.tif:0017-0478	4.03	1231.08	3	5137	146.654	76.964	0.536	4961.57	190818	3.096	0.323	0.767	2.24356
604	ARL13B_KAN582-13_2.tif:0018-0484	3.874	1003.91	126	3739	192.916	78.024	0.388	3889.39	149583	5.315	0.188	0.782	1.75873
605	ARL13B_KAN582-13_2.tif:0019-0532	5.616	342.222	23	1083	70.108	85.948	0.192	1922.04	73920	6.588	0.152	0.474	0.86912
606	ARL13B_KAN582-13_2.tif:0020-0552	4.576	987.188	138	3400	163.252	88.888	0.389	4517.64	173745	4.948	0.202	0.698	2.04282
607	ARL13B_KAN582-13_2.tif:0021-0565	3.978	712.163	150	2181	215.033	90.822	0.276	2833.16	108961	6.107	0.164	0.602	1.28112
608	ARL13B_KAN582-13_2.tif:0022-0567	2.314	231.708	64	415	106.25	91.556	0.533	536.204	20622	3.441	0.291	0.828	0.242465
609	ARL13B_KAN582-13_2.tif:0023-0603	4.628	786.449	109	2559	79.043	97.485	0.385	3639.91	139988	5.221	0.192	0.804	1.64592
610	ARL13B_KAN582-13_2.tif:0024-0663	3.172	506.344	49	1694	41.165	106.937	0.509	1606.22	61774	3.249	0.308	0.777	0.726312
611	ARL13B_KAN582-13_2.tif:0025-0753	0.286	117.364	21	187	127.263	121.531	0.443	33.568	1291	4.798	0.208	0.815	0.015179
612	ARL13B_KAN582-13_2.tif:0026-0789	0.338	119.692	0	216	136.821	127.158	0.389	40.458	1556	4.182	0.239	0.65	0.0182948
613	ARL13B_KAN582-13_2.tif:0027-0804	5.564	399.425	0	1196	144.333	130.133	0.226	2222.54	85477	5.071	0.197	0.496	1.005
614	ARL13B_KAN582-13_2.tif:0028-0822	3.9	968.687	72	3167	105.953	132.532	0.503	3778.11	145303	4.021	0.249	0.831	1.70841
615	ARL13B_KAN582-13_2.tif:0029-0861	4.55	503.063	45	1562	57.785	139.017	0.323	2289.07	88036	5.587	0.179	0.686	1.03509
616	ARL13B_KAN582-13_2.tif:0030-0875	3.302	1079.68	0	4102	148.917	140.933	0.495	3565.34	137120	3.242	0.308	0.724	1.6122
617	ARL13B_KAN582-13_2.tif:0031-0918	2.938	619.708	30	1966	95.103	148.177	0.526	1820.81	70027	2.991	0.334	0.753	0.823347
618	ARL13B_KAN582-13_2.tif:0032-0951	2.782	567.411	138	1275	50.852	153.137	0.329	1578.63	60713	4.789	0.209	0.611	0.713837
619	ARL13B_KAN582-13_2.tif:0033-0964	3.198	243.423	89	396	163.882	155.502	0.385	778.513	29941	3.074	0.325	0.687	0.352033
620	ARL13B_KAN582-13_2.tif:0034-1006	0.546	153.143	116	187	154.819	162.221	0.476	83.621	3216	3.391	0.295	0.656	0.0378123
621	ARL13B_KAN582-13_2.tif:0035-1015	1.404	174.426	104	225	156.923	163.734	0.369	244.909	9419	4.823	0.207	0.639	0.110745
622	ARL13B_KAN582-13_3.tif:0001-0025	3.172	437.311	35	1117	220.249	3.986	0.566	1387.24	53352	2.525	0.396	0.785	0.62729
623	ARL13B_KAN582-13_3.tif:0002-0042	3.952	695.809	113	2200	59.439	6.714	0.378	2750	105763	4.799	0.208	0.747	1.24352
624	ARL13B_KAN582-13_3.tif:0003-0115	3.666	977.879	97	2773	202.284	18.766	0.469	3585.12	137881	3.956	0.253	0.832	1.62115
625	ARL13B_KAN582-13_3.tif:0004-0146	4.342	449.898	93	1100	31.521	23.771	0.373	1953.58	75133	4.611	0.217	0.746	0.883382
626	ARL13B_KAN582-13_3.tif:0005-0159	3.952	354.447	152	689	204.091	25.773	0.364	1400.86	53876	5.504	0.182	0.766	0.633451
627	ARL13B_KAN582-13_3.tif:0006-0154	1.56	570.233	150	1160	222.85	24.94	0.514	889.618	34214	4.144	0.241	0.774	0.402274
628	ARL13B_KAN582-13_3.tif:0007-0191	2.886	353.739	70	835	223.12	31.062	0.332	1020.95	39265	3.304	0.303	0.595	0.461661
629	ARL13B_KAN582-13_3.tif:0008-0197	4.16	1086.62	124	3773	94.144	31.602	0.472	4520.61	173859	3.738	0.268	0.744	2.04416
630	ARL13B_KAN582-13_3.tif:0009-0308	2.73	451.143	17	1853	31.758	49.681	0.408	1231.69	47370	3.403	0.294	0.65	0.556956
631	ARL13B_KAN582-13_3.tif:0010-0324	2.132	688.073	59	1882	131.916	52.066	0.4	1467.06	56422	3.867	0.259	0.631	0.663386
632	ARL13B_KAN582-13_3.tif:0011-0326	3.432	485.295	132	1098	4.961	52.541	0.496	1665.63	64059	4.114	0.243	0.841	0.753178
633	ARL13B_KAN582-13_3.tif:0012-0331	2.938	385.372	92	1661	70.3	53.346	0.421	1132.29	43547	4.458	0.224	0.722	0.512007
634	ARL13B_KAN582-13_3.tif:0013-0469	3.25	759.672	150	2326	196.826	75.695	0.483	2469.08	94959	3.871	0.258	0.794	1.11649
635	ARL13B_KAN582-13_3.tif:0014-0472	2.834	630.358	110	1624	105.269	76.3	0.39	1786.54	68709	4.69	0.213	0.696	0.807851
636	ARL13B_KAN582-13_3.tif:0015-0502	3.64	613.307	37	2058	134.524	80.732	0.462	2232.57	85863	3.595	0.278	0.78	1.00954
637	ARL13B_KAN582-13_3.tif:0016-0527	1.846	316.408	153	659	22.669	84.864	0.519	584.125	22465	2.355	0.425	0.732	0.264134
638	ARL13B_KAN582-13_3.tif:0017-0546	2.262	387.575	78	1085	77.72	87.967	0.289	876.747	33719	6.854	0.146	0.704	0.396454
639	ARL13B_KAN582-13_3.tif:0018-0609	3.9	850.507	101	2644	101.529	98.259	0.35	3317.18	127576	5.419	0.185	0.726	1.49998
640	ARL13B_KAN582-13_3.tif:0019-0624	3.718	1107.58	117	3362	73.063	100.657	0.453	4118.23	158384	2.99	0.334	0.665	1.86221
641	ARL13B_KAN582-13_3.tif:0020-0641	3.172	1124.79	117	3720	145.681	103.32	0.422	3568.04	137224	4.591	0.218	0.808	1.61342
642	ARL13B_KAN582-13_3.tif:0021-0677	4.16	791.8	108	2213	164.056	109.412	0.553	3294.09	126688	3.292	0.304	0.808	1.48954
643	ARL13B_KAN582-13_3.tif:0022-0734	4.628	809.067	22	2732	73.382	118.298	0.439	3744.59	144014	4.289	0.233	0.772	1.69325
644	ARL13B_KAN582-13_3.tif:0023-0744	4.264	532.006	101	1156	65.566	119.781	0.517	2268.61	87249	3.138	0.319	0.85	1.02584
645	ARL13B_KAN582-13_3.tif:0024-0776	1.56	438	95	1150	58.894	125.165	0.451	683.321	26280	2.289	0.437	0.635	0.308989
646	ARL13B_KAN582-13_3.tif:0025-0816	4.758	475.989	67	1145	204.381	131.906	0.328	2264.89	87106	4.642	0.215	0.637	1.02415
647	ARL13B_KAN582-13_3.tif:0026-0878	1.924	493.595	157	1060	74.65	141.601	0.383	949.733	36526	5.868	0.17	0.755	0.429457
648	ARL13B_KAN582-13_3.tif:0027-0917	3.38	802.969	41	2365	97.183	147.829	0.363	2714.2	104386	3.759	0.266	0.636	1.22733
649	ARL13B_KAN582-13_3.tif:0028-0941	4.082	495.318	92	1175	164.363	151.615	0.355	2022.01	77765	5.492	0.182	0.724	0.914328
650	ARL13B_KAN582-13_3.tif:0029-1034	2.574	378.495	71	993	164.121	166.831	0.273	974.305	37471	5.528	0.181	0.631	0.440568
651	ARL13B_KAN582-13_4.tif:0001-0028	2.808	580.917	151	1476	210.189	4.623	0.312	1631.31	62739	7.381	0.135	0.706	0.737658
652	ARL13B_KAN582-13_4.tif:0002-0033	3.614	746.619	79	2514	125.872	5.422	0.399	2698.44	103780	4.603	0.217	0.739	1.2202
653	ARL13B_KAN582-13_4.tif:0003-0038	2.444	663.415	150	1643	193.08	6.309	0.413	1621.48	62361	5.183	0.193	0.78	0.733214
654	ARL13B_KAN582-13_4.tif:0004-0110	4.29	595.709	63	1848	53.31	17.735	0.397	2555.75	98292	4.987	0.201	0.755	1.15568
655	ARL13B_KAN582-13_4.tif:0005-0145	3.874	639.255	54	2107	80.247	23.441	0.466	2476.62	95249	3.623	0.276	0.745	1.1199
656	ARL13B_KAN582-13_4.tif:0006-0177	0.91	147.486	47	201	206.854	28.493	0.324	134.22	5162	4.475	0.223	0.543	0.0606926
657	ARL13B_KAN582-13_4.tif:0007-0206	2.522	271	144	579	170.542	33.18	0.53	683.503	26287	3.682	0.272	0.758	0.309071
658	ARL13B_KAN582-13_4.tif:0008-0234	1.378	425.491	153	1007	191.999	37.545	0.441	586.361	22551	3.667	0.273	0.654	0.265145
659	ARL13B_KAN582-13_4.tif:0009-0246	2.08	307.9	138	647	219.977	39.684	0.437	640.471	24632	3.856	0.259	0.731	0.289612
660	ARL13B_KAN582-13_4.tif:0010-0263	3.744	495.556	31	1650	24.843	42.372	0.494	1855.47	71360	2.184	0.458	0.727	0.83902
661	ARL13B_KAN582-13_4.tif:0011-0256	1.508	300.845	24	710	216.27	41.383	0.54	453.701	17449	3.605	0.277	0.853	0.205158
662	ARL13B_KAN582-13_4.tif:0012-0326	3.354	782.085	149	2648	92.904	52.597	0.534	2623.27	100889	3.756	0.266	0.854	1.18621
663	ARL13B_KAN582-13_4.tif:0013-0377	3.406	700.107	21	2526	97.49	60.956	0.518	2384.71	91714	3.492	0.286	0.801	1.07833
664	ARL13B_KAN582-13_4.tif:0014-0404	2.08	267.688	119	529	146.23	65.135	0.292	556.824	21415	6.204	0.161	0.565	0.251788
665	ARL13B_KAN582-13_4.tif:0015-0466	3.978	769.471	120	2087	108.38	75.016	0.395	3061.14	117729	4.869	0.205	0.757	1.38421
666	ARL13B_KAN582-13_4.tif:0016-0472	3.276	343.421	151	654	12.149	76.173	0.427	1125.11	43271	4.72	0.212	0.775	0.508762
667	ARL13B_KAN582-13_4.tif:0017-0497	3.302	688.906	61	2256	127.633	80.122	0.426	2274.9	87491	5.196	0.192	0.841	1.02868
668	ARL13B_KAN582-13_4.tif:0018-0530	2.392	732.163	43	2027	175.479	85.128	0.392	1751.44	67359	3.923	0.255	0.733	0.791978
669	ARL13B_KAN582-13_4.tif:0019-0535	2.08	350.9	147	923	198.737	86.474	0.329	729.916	28072	5.762	0.174	0.684	0.330059
670	ARL13B_KAN582-13_4.tif:0020-0552	2.652	607.147	61	2420	6.616	89.084	0.322	1610.25	61929	5.788	0.173	0.66	0.728135
671	ARL13B_KAN582-13_4.tif:0021-0561	4.368	764.607	65	2353	147.484	90.229	0.386	3340.01	128454	2.963	0.337	0.601	1.51031
672	ARL13B_KAN582-13_4.tif:0022-0691	3.822	674.51	150	1748	50.982	111.398	0.429	2578.13	99153	4.478	0.223	0.774	1.1658
673	ARL13B_KAN582-13_4.tif:0023-0697	4.316	709.88	110	2753	116.618	112.361	0.367	3064.03	117840	5.621	0.178	0.687	1.38551
674	ARL13B_KAN582-13_4.tif:0024-0787	2.47	525.874	119	1604	61.174	126.945	0.463	1298.99	49958	3.529	0.283	0.662	0.587385
675	ARL13B_KAN582-13_4.tif:0025-0784	3.692	635.162	151	1652	219.707	126.429	0.44	2345.16	90193	4.736	0.211	0.823	1.06045
676	ARL13B_KAN582-13_4.tif:0026-0815	3.874	288.242	9	659	131.522	131.59	0.493	1116.71	42948	2.662	0.376	0.723	0.504964
677	ARL13B_KAN582-13_4.tif:0027-0887	3.042	398.744	79	1123	84.472	143.158	0.282	1213.05	46653	7.456	0.134	0.694	0.548526
678	ARL13B_KAN582-13_4.tif:0028-0907	3.484	274.754	90	737	115.276	146.37	0.566	957.3	36817	2.451	0.408	0.761	0.432878
679	ARL13B_KAN582-13_4.tif:0029-1019	2.314	285.618	109	579	145.764	164.311	0.223	660.96	25420	5.389	0.186	0.536	0.298877
680	ARL13B_KAN582-13_5.tif:0001-0015	3.484	720.164	100	2597	63.145	2.43	0.37	2509.2	96502	5.612	0.178	0.687	1.13463
681	ARL13B_KAN582-13_5.tif:0002-0011	2.626	406.752	35	1042	8.751	1.666	0.422	1068.2	41082	4.779	0.209	0.783	0.483025
682	ARL13B_KAN582-13_5.tif:0003-0078	3.094	1100.13	102	3684	102.473	12.592	0.586	3403.99	130915	3.309	0.302	0.847	1.53924
683	ARL13B_KAN582-13_5.tif:0004-0145	2.574	750.535	131	2359	157.417	23.268	0.358	1931.99	74303	6.052	0.165	0.753	0.873623
684	ARL13B_KAN582-13_5.tif:0005-0164	4.602	702.559	150	1872	133.341	26.484	0.566	3233.37	124353	3.485	0.287	0.861	1.46209
685	ARL13B_KAN582-13_5.tif:0006-0185	4.186	742.41	86	2199	94.487	29.788	0.342	3107.91	119528	5.605	0.178	0.725	1.40536
686	ARL13B_KAN582-13_5.tif:0007-0210	3.094	367.782	69	856	199.224	33.71	0.427	1137.98	43766	4.149	0.241	0.799	0.514582
687	ARL13B_KAN582-13_5.tif:0008-0243	2.262	837.172	152	4246	37.04	39.187	0.332	1893.8	72834	5.559	0.18	0.659	0.856351
688	ARL13B_KAN582-13_5.tif:0009-0312	3.822	189.673	126	280	218.301	50.39	0.405	724.976	27882	5.223	0.191	0.717	0.327825
689	ARL13B_KAN582-13_5.tif:0010-0323	3.874	488.664	126	1194	153.559	52.339	0.562	1893.2	72811	2.6	0.385	0.856	0.856081
690	ARL13B_KAN582-13_5.tif:0011-0358	4.732	419.022	150	1039	58.987	57.663	0.477	1982.93	76262	4.135	0.242	0.841	0.896656
691	ARL13B_KAN582-13_5.tif:0012-0382	2.73	890.59	133	3449	130.269	61.462	0.478	2431.46	93512	2.77	0.361	0.714	1.09947
692	ARL13B_KAN582-13_5.tif:0013-0426	2.288	590.693	152	1367	2.804	68.749	0.511	1351.59	51981	3.976	0.251	0.819	0.61117
693	ARL13B_KAN582-13_5.tif:0014-0526	3.042	1011.45	82	3750	66.347	84.857	0.497	3077.03	118340	4.255	0.235	0.851	1.39139
694	ARL13B_KAN582-13_5.tif:0015-0628	5.148	742.389	150	2774	167.562	101.352	0.465	3822.05	146993	4.086	0.245	0.789	1.72828
695	ARL13B_KAN582-13_5.tif:0016-0638	3.666	748.27	24	2431	119.791	102.701	0.388	2743.32	105506	3.585	0.279	0.627	1.24049
696	ARL13B_KAN582-13_5.tif:0017-0647	5.018	956.13	27	3385	50.728	104.092	0.419	4798.15	184533	2.46	0.407	0.64	2.16966
697	ARL13B_KAN582-13_5.tif:0018-0760	2.678	667.058	52	2020	15.456	122.493	0.419	1786.49	68707	3.164	0.316	0.64	0.807827
698	ARL13B_KAN582-13_5.tif:0019-0766	2.73	1076.66	141	3814	112.059	123.744	0.586	2939.45	113049	3.003	0.333	0.861	1.32918
699	ARL13B_KAN582-13_5.tif:0020-0773	4.212	542.056	152	1248	183.141	124.689	0.405	2283.28	87813	5.171	0.193	0.771	1.03247
700	ARL13B_KAN582-13_5.tif:0021-0797	2.834	583.789	151	1322	154.844	128.7	0.484	1654.56	63633	4.186	0.239	0.813	0.74817
701	ARL13B_KAN582-13_5.tif:0022-0911	2.99	572.139	157	1720	172.161	146.899	0.541	1710.8	65796	3.658	0.273	0.83	0.773601
702	ARL13B_KAN582-13_5.tif:0023-0938	3.224	891.766	152	2145	112.84	151.237	0.596	2875.23	110579	2.861	0.35	0.787	1.30014
703	ARL13B_KAN582-13_5.tif:0024-0972	2.574	300.111	84	735	48.156	156.979	0.334	772.533	29711	4.604	0.217	0.615	0.349329
704	ARL13B_KAN582-13_6.tif:0001-0105	2.808	430.398	104	1027	30.506	17.024	0.549	1208.63	46483	3.508	0.285	0.794	0.546527
705	ARL13B_KAN582-13_6.tif:0002-0230	4.004	639.818	119	1693	185.675	36.906	0.454	2561.99	98532	3.846	0.26	0.788	1.1585
706	ARL13B_KAN582-13_6.tif:0003-0234	2.782	812.374	57	2436	207.029	37.75	0.52	2260.16	86924	3.167	0.316	0.759	1.02202
707	ARL13B_KAN582-13_6.tif:0004-0240	3.666	412.709	112	909	22.54	38.702	0.399	1513.08	58192	4.535	0.22	0.748	0.684197
708	ARL13B_KAN582-13_6.tif:0005-0245	3.224	528.895	150	1508	76.527	39.554	0.478	1705.26	65583	3.631	0.275	0.816	0.771097
709	ARL13B_KAN582-13_6.tif:0006-0299	4.212	621.574	141	1754	108.864	48.285	0.509	2618.23	100695	3.864	0.259	0.831	1.18393
710	ARL13B_KAN582-13_6.tif:0007-0341	2.912	976.652	150	3179	178.928	54.929	0.512	2844.18	109385	3.35	0.299	0.757	1.2861
711	ARL13B_KAN582-13_6.tif:0008-0425	4.498	961.48	27	3466	124.582	68.578	0.398	4325	166336	5.234	0.191	0.752	1.95571
712	ARL13B_KAN582-13_6.tif:0009-0423	2.184	352.429	37	869	163.385	68.243	0.282	769.75	29604	5.573	0.179	0.697	0.348071
713	ARL13B_KAN582-13_6.tif:0010-0551	0.338	166.923	108	195	204.62	88.781	0.403	56.423	2170	3.575	0.28	0.578	0.0255139
714	ARL13B_KAN582-13_6.tif:0011-0576	1.43	221.782	43	596	89.909	92.785	0.455	317.167	12198	3.555	0.281	0.743	0.143419
715	ARL13B_KAN582-13_6.tif:0012-0579	2.288	621.364	94	1635	6.893	93.558	0.472	1421.77	54680	3.533	0.283	0.786	0.642904
716	ARL13B_KAN582-13_6.tif:0013-0587	3.978	627.255	55	1757	33.229	94.892	0.429	2495.37	95970	4.282	0.234	0.781	1.12837
717	ARL13B_KAN582-13_6.tif:0014-0607	2.158	367.024	14	1212	156.581	98.058	0.565	792.086	30463	3.111	0.321	0.851	0.358171
718	ARL13B_KAN582-13_6.tif:0015-0647	3.926	886.106	150	2651	200.808	104.512	0.35	3479.06	133802	5.416	0.185	0.704	1.57319
719	ARL13B_KAN582-13_6.tif:0016-0657	3.796	604.555	36	1779	129.792	105.837	0.321	2295.03	88265	4.566	0.219	0.674	1.03778
720	ARL13B_KAN582-13_6.tif:0017-0728	4.03	611.071	56	1823	16.764	117.619	0.42	2462.76	94716	4.991	0.2	0.807	1.11363
721	ARL13B_KAN582-13_6.tif:0018-0742	3.172	851.77	123	3036	34.222	119.716	0.579	2701.98	103916	3.107	0.322	0.865	1.2218
722	ARL13B_KAN582-13_6.tif:0019-0766	3.796	654.979	112	2525	50.028	123.601	0.461	2486.45	95627	4.281	0.234	0.818	1.12434
723	ARL13B_KAN582-13_6.tif:0020-0858	3.224	847.589	77	2690	179.015	138.558	0.439	2732.79	105101	3.89	0.257	0.732	1.23573
724	ARL13B_KAN582-13_6.tif:0021-0898	3.198	635.374	150	1601	191.37	144.812	0.47	2032.05	78151	3.999	0.25	0.786	0.918866
725	ARL13B_KAN582-13_6.tif:0022-0905	1.378	480.189	147	964	168.395	145.997	0.53	661.74	25450	3.991	0.251	0.774	0.29923
726	ARL13B_KAN582-13_6.tif:0023-0918	3.64	456.036	124	1196	201.939	147.703	0.261	1660.07	63845	5.82	0.172	0.585	0.750662
727	ARL13B_KAN582-13_6.tif:0024-0914	0.338	172.154	135	230	4.509	147.414	0.545	58.192	2238	1.897	0.527	0.65	0.0263134
728	ARL13B_KAN582-13_6.tif:0025-0942	4.03	901.613	139	2988	85.536	151.735	0.315	3633.72	139750	5.861	0.171	0.733	1.64312
729	ARL13B_KAN582-13_6.tif:0026-1000	2.938	410.956	151	812	218.649	161.385	0.438	1207.46	46438	5.111	0.196	0.813	0.545998
730	ARL13B_KAN582-13_6.tif:0027-1021	3.068	807.475	51	2076	144.511	164.758	0.429	2477.48	95282	4.783	0.209	0.774	1.12028
										78525.2				0.923265

## Sheet: KAN583
701	ARL13B_KAN583-1_1.tif:0001-0018	4.524	720.874	150	2161	126.874	2.886	0.424	3261.43	125432	4.697	0.213	0.787	1.68055
702	ARL13B_KAN583-1_1.tif:0002-0059	2.548	631.469	110	1882	162.978	9.675	0.473	1609.08	61884	3.917	0.255	0.74	0.829128
703	ARL13B_KAN583-1_1.tif:0003-0103	2.47	574.589	150	1273	21.749	16.593	0.463	1419.32	54586	4.345	0.23	0.763	0.731349
704	ARL13B_KAN583-1_1.tif:0004-0122	4.108	667.842	54	2108	155.741	19.919	0.545	2743.66	105519	3.309	0.302	0.873	1.41375
705	ARL13B_KAN583-1_1.tif:0005-0123	4.03	1093.67	73	3932	55.23	19.704	0.44	4407.76	169519	3.981	0.251	0.793	2.27123
706	ARL13B_KAN583-1_1.tif:0006-0145	4.056	618.404	25	2055	93.625	23.352	0.446	2508.4	96471	3.819	0.262	0.729	1.29253
707	ARL13B_KAN583-1_1.tif:0007-0377	1.43	251.345	80	596	0.875	61.001	0.288	359.446	13824	6.626	0.151	0.683	0.185215
708	ARL13B_KAN583-1_1.tif:0008-0390	4.342	864.198	151	2868	104.868	62.741	0.43	3752.57	144321	2.815	0.355	0.659	1.93363
709	ARL13B_KAN583-1_1.tif:0009-0396	3.666	1564.05	126	5049	167.744	63.83	0.46	5734.15	220531	4.208	0.238	0.844	2.9547
710	ARL13B_KAN583-1_1.tif:0010-0445	3.744	721.104	87	2715	33.254	71.707	0.309	2699.98	103839	6.429	0.156	0.689	1.39125
711	ARL13B_KAN583-1_1.tif:0011-0450	2.678	827.854	134	2555	211.061	72.844	0.467	2217.13	85269	3.407	0.294	0.792	1.14244
712	ARL13B_KAN583-1_1.tif:0012-0521	2.808	477.157	147	1360	158.891	84.295	0.404	1339.94	51533	3.057	0.327	0.603	0.690444
713	ARL13B_KAN583-1_1.tif:0013-0560	2.756	924.528	150	2225	18.658	90.338	0.56	2548.15	98000	3.652	0.274	0.835	1.31301
714	ARL13B_KAN583-1_1.tif:0014-0574	3.692	551.521	93	1463	68.188	92.438	0.298	2036.34	78316	4.257	0.235	0.603	1.04929
715	ARL13B_KAN583-1_1.tif:0015-0619	3.25	755.08	82	2648	52.692	99.887	0.43	2454.16	94385	3.854	0.259	0.681	1.26458
716	ARL13B_KAN583-1_1.tif:0016-0631	2.6	477.34	79	1335	114.425	101.783	0.37	1241.16	47734	3.746	0.267	0.69	0.639545
717	ARL13B_KAN583-1_1.tif:0017-0679	4.446	409.649	127	831	154.706	109.373	0.587	1821.41	70050	2.76	0.362	0.857	0.938537
718	ARL13B_KAN583-1_1.tif:0018-0712	2.34	347.933	31	999	22.192	115.1	0.295	814.213	31314	5.605	0.178	0.61	0.419548
719	ARL13B_KAN583-1_1.tif:0019-0734	2.99	471.626	65	1343	162.399	118.235	0.553	1410.25	54237	3.436	0.291	0.824	0.726673
720	ARL13B_KAN583-1_1.tif:0020-0877	0.858	176.091	132	233	178.013	141.238	0.506	151.095	5811	2.733	0.366	0.71	0.0778564
721	ARL13B_KAN583-1_1.tif:0021-0901	1.222	220.872	108	403	70.598	145.319	0.51	269.922	10381	2.534	0.395	0.712	0.139086
722	ARL13B_KAN583-1_1.tif:0022-0933	1.04	140.925	10	234	95.049	150.62	0.405	146.571	5637	3.429	0.292	0.63	0.0755251
723	ARL13B_KAN583-1_1.tif:0023-0932	2.47	389.905	59	1098	215.353	150.422	0.466	963.124	37041	2.972	0.337	0.798	0.496279
724	ARL13B_KAN583-1_1.tif:0024-0981	3.198	714.935	84	2258	119.251	158.144	0.383	2286.5	87937	5.202	0.192	0.699	1.17819
725	ARL13B_KAN583-1_1.tif:0025-1030	1.69	527.015	61	1135	92.993	166.114	0.572	890.71	34256	2.735	0.366	0.756	0.458965
726	ARL13B_KAN583-1_2.tif:0001-0012	1.69	567.231	151	1154	141.482	2.001	0.462	958.678	36870	4.37	0.229	0.778	0.493988
727	ARL13B_KAN583-1_2.tif:0002-0144	3.848	894.676	148	2802	63.969	23.284	0.512	3442.92	132412	3.377	0.296	0.818	1.77407
728	ARL13B_KAN583-1_2.tif:0003-0173	3.172	644.041	150	1906	43.783	27.71	0.462	2043.02	78573	3.778	0.265	0.722	1.05273
729	ARL13B_KAN583-1_2.tif:0004-0191	2.704	728.269	122	2570	88.06	30.72	0.589	1969.36	75740	2.195	0.456	0.751	1.01477
730	ARL13B_KAN583-1_2.tif:0005-0234	4.03	663.897	44	2123	149.832	37.765	0.447	2675.66	102904	4.596	0.218	0.814	1.37872
731	ARL13B_KAN583-1_2.tif:0006-0245	1.43	342.891	2	920	30.27	39.531	0.475	490.364	18859	4.54	0.22	0.821	0.252675
732	ARL13B_KAN583-1_2.tif:0007-0261	3.094	866.521	62	3233	113.54	42.103	0.431	2681.18	103116	4.654	0.215	0.81	1.38156
733	ARL13B_KAN583-1_2.tif:0008-0398	2.626	984.545	115	3146	182.747	64.381	0.425	2585.57	99439	3.699	0.27	0.795	1.33229
734	ARL13B_KAN583-1_2.tif:0009-0487	2.34	1148.89	52	4187	110.926	78.821	0.568	2688.56	103400	2.249	0.445	0.753	1.38536
735	ARL13B_KAN583-1_2.tif:0010-0508	3.068	596.636	95	1848	84.664	81.985	0.347	1830.59	70403	5.499	0.182	0.726	0.943267
736	ARL13B_KAN583-1_2.tif:0011-0517	3.432	979.871	0	3708	159.402	83.212	0.541	3363.12	129343	2.438	0.41	0.731	1.73295
737	ARL13B_KAN583-1_2.tif:0012-0523	2.366	548.593	88	1778	25.746	84.359	0.458	1298.05	49922	4.33	0.231	0.778	0.66886
738	ARL13B_KAN583-1_2.tif:0013-0523	2.21	697.435	53	2596	49.988	84.479	0.417	1541.42	59282	2.936	0.341	0.646	0.794266
739	ARL13B_KAN583-1_2.tif:0014-0696	2.964	612.307	117	1696	110.808	112.148	0.39	1814.99	69803	5.184	0.193	0.763	0.935228
740	ARL13B_KAN583-1_2.tif:0015-0730	3.666	729.277	102	2416	204.066	117.826	0.505	2673.69	102828	4.083	0.245	0.847	1.3777
741	ARL13B_KAN583-1_2.tif:0016-0799	4.108	524.342	86	1447	158.525	128.745	0.522	2154.13	82846	3.201	0.312	0.798	1.10998
742	ARL13B_KAN583-1_2.tif:0017-0831	1.222	258.936	119	612	95.156	134.073	0.58	316.439	12170	2.984	0.335	0.839	0.163055
743	ARL13B_KAN583-1_2.tif:0018-0866	2.73	522.133	52	1633	29.261	139.682	0.492	1425.51	54824	4.026	0.248	0.847	0.734538
744	ARL13B_KAN583-1_2.tif:0019-0896	3.328	371.328	58	962	108.701	144.951	0.294	1235.85	47530	5.617	0.178	0.621	0.636812
745	ARL13B_KAN583-1_2.tif:0020-0886	1.768	216.029	150	422	171.331	142.917	0.583	381.963	14690	3.224	0.31	0.805	0.196818
746	ARL13B_KAN583-1_2.tif:0021-0927	3.692	659.732	153	1805	124.343	149.693	0.419	2435.88	93682	3.764	0.266	0.678	1.25516
747	ARL13B_KAN583-1_2.tif:0022-0989	2.548	671.5	87	1935	44.303	159.593	0.449	1711.09	65807	4.764	0.21	0.81	0.881689
748	ARL13B_KAN583-1_3.tif:0001-0109	4.628	477.904	105	1963	116.485	17.359	0.352	2211.88	85067	4.656	0.215	0.685	1.13974
749	ARL13B_KAN583-1_3.tif:0002-0122	3.9	434.887	66	1293	35.647	19.827	0.404	1696.16	65233	4.279	0.234	0.694	0.873998
750	ARL13B_KAN583-1_3.tif:0003-0152	2.314	609.82	117	2054	145.555	24.524	0.556	1411.21	54274	2.492	0.401	0.754	0.727169
751	ARL13B_KAN583-1_3.tif:0004-0200	2.47	449.979	31	1615	197.344	32.346	0.481	1111.52	42748	4.027	0.248	0.772	0.572742
752	ARL13B_KAN583-1_3.tif:0005-0210	4.368	471.994	33	1230	123.399	33.93	0.299	2061.79	79295	6.413	0.156	0.687	1.0624
753	ARL13B_KAN583-1_3.tif:0006-0248	4.576	781.898	151	2568	107.849	39.964	0.589	3578.18	137614	3.177	0.315	0.822	1.84377
754	ARL13B_KAN583-1_3.tif:0007-0265	3.614	519.065	98	1823	154.224	42.544	0.276	1876.01	72150	6.056	0.165	0.599	0.966673
755	ARL13B_KAN583-1_3.tif:0008-0259	3.094	999.471	115	3265	218.77	41.698	0.478	3092.55	118937	3.06	0.327	0.788	1.59353
756	ARL13B_KAN583-1_3.tif:0009-0285	2.418	409.161	139	913	4.455	45.827	0.562	989.412	38052	3.622	0.276	0.827	0.509825
757	ARL13B_KAN583-1_3.tif:0010-0388	3.406	987.206	108	2816	189.264	62.536	0.436	3362.63	129324	4.32	0.231	0.796	1.7327
758	ARL13B_KAN583-1_3.tif:0011-0416	4.784	350.19	130	603	182.489	67.079	0.508	1675.41	64435	3.933	0.254	0.844	0.863307
759	ARL13B_KAN583-1_3.tif:0012-0451	3.796	632.815	103	2847	64.778	72.926	0.418	2402.31	92391	4.657	0.215	0.811	1.23786
760	ARL13B_KAN583-1_3.tif:0013-0468	2.652	588.127	137	1824	29.295	75.271	0.555	1559.81	59989	2.955	0.338	0.813	0.803739
761	ARL13B_KAN583-1_3.tif:0014-0492	3.536	771.206	152	2329	147.981	79.282	0.582	2727.15	104884	3.145	0.318	0.837	1.40525
762	ARL13B_KAN583-1_3.tif:0015-0580	4.238	672.926	53	2879	108.679	93.579	0.432	2852.03	109687	4.075	0.245	0.744	1.4696
763	ARL13B_KAN583-1_3.tif:0016-0601	2.808	593.056	72	1752	94.454	97.02	0.373	1665.4	64050	5.611	0.178	0.753	0.858149
764	ARL13B_KAN583-1_3.tif:0017-0610	3.432	1154.74	152	4035	195.422	98.338	0.475	3963.32	152426	4.004	0.25	0.828	2.04222
765	ARL13B_KAN583-1_3.tif:0018-0650	5.772	260.009	0	1632	172.109	104.653	0.231	1500.86	57722	2.469	0.405	0.471	0.773365
766	ARL13B_KAN583-1_3.tif:0019-0678	7.8	160.973	0	391	164.695	110.043	0.141	1255.67	48292	1.416	0.706	0.384	0.647021
767	ARL13B_KAN583-1_3.tif:0020-0664	0.312	126.917	53	197	173.129	106.868	0.298	39.6	1523	1.626	0.615	0.444	0.0204053
768	ARL13B_KAN583-1_3.tif:0021-0683	0.26	184.9	158	214	174.505	110.134	0.482	48.077	1849	2.982	0.335	0.606	0.0247731
769	ARL13B_KAN583-1_3.tif:0022-0765	3.848	678.115	54	1969	62.493	123.378	0.386	2609.54	100361	4.838	0.207	0.729	1.34465
770	ARL13B_KAN583-1_3.tif:0023-0852	3.484	599.157	55	2153	177.015	137.511	0.521	2087.59	80287	3.041	0.329	0.788	1.07569
771	ARL13B_KAN583-1_3.tif:0024-0862	2.6	793.11	153	2849	197.905	139.072	0.457	2062.21	79311	4.32	0.232	0.794	1.06262
772	ARL13B_KAN583-1_3.tif:0025-0939	3.146	833.884	98	3102	111.727	151.314	0.505	2623.56	100900	3.85	0.26	0.829	1.35187
773	ARL13B_KAN583-1_3.tif:0026-0981	2.808	547.741	98	1657	157.82	158.074	0.437	1538.15	59156	2.344	0.427	0.647	0.792578
774	ARL13B_KAN583-1_3.tif:0027-1006	3.146	592.612	45	1526	91.832	162.016	0.317	1864.47	71706	2.86	0.35	0.516	0.960724
775	ARL13B_KAN583-1_4.tif:0001-0021	3.224	294.968	42	611	27.169	3.666	0.339	951.033	36576	5.765	0.173	0.805	0.490049
776	ARL13B_KAN583-1_4.tif:0002-0116	2.184	494.226	38	1748	173.188	18.63	0.55	1079.45	41515	2.926	0.342	0.796	0.556222
777	ARL13B_KAN583-1_4.tif:0003-0136	1.82	348.057	151	566	6.386	21.976	0.597	633.502	24364	2.704	0.37	0.805	0.326431
778	ARL13B_KAN583-1_4.tif:0004-0142	3.172	406.574	108	875	34.129	22.953	0.514	1289.73	49602	3.335	0.3	0.856	0.664573
779	ARL13B_KAN583-1_4.tif:0005-0165	2.392	378.185	96	1028	88.116	26.775	0.394	904.672	34793	3.904	0.256	0.603	0.46616
780	ARL13B_KAN583-1_4.tif:0006-0181	4.082	860.618	155	2554	160.326	29.137	0.569	3513.25	135117	2.992	0.334	0.88	1.81031
781	ARL13B_KAN583-1_4.tif:0007-0209	5.616	737.037	102	2048	199.89	34.131	0.414	4139.45	159200	3.212	0.311	0.688	2.13298
782	ARL13B_KAN583-1_4.tif:0008-0239	3.744	531.792	84	1375	73.583	38.545	0.569	1991.15	76578	3.31	0.302	0.917	1.026
783	ARL13B_KAN583-1_4.tif:0009-0251	4.004	486.786	147	1518	110.869	40.534	0.572	1949.21	74965	3.399	0.294	0.858	1.00439
784	ARL13B_KAN583-1_4.tif:0010-0330	4.914	462.974	147	1397	183.197	53.376	0.444	2275.19	87502	4.45	0.225	0.783	1.17236
785	ARL13B_KAN583-1_4.tif:0011-0379	2.288	391.682	151	900	158.148	61.182	0.474	896.222	34468	3.241	0.309	0.667	0.461806
786	ARL13B_KAN583-1_4.tif:0012-0451	3.38	802.615	152	2589	73.52	72.544	0.453	2713	104340	4.383	0.228	0.785	1.39796
787	ARL13B_KAN583-1_4.tif:0013-0463	4.576	564.074	62	1427	139.246	74.618	0.44	2581.36	99277	4.338	0.231	0.836	1.33012
788	ARL13B_KAN583-1_4.tif:0014-0477	2.158	511.241	100	1740	100.633	77.034	0.505	1103.32	42433	3.362	0.297	0.765	0.568522
789	ARL13B_KAN583-1_4.tif:0015-0525	4.186	901.174	139	3133	171.58	84.505	0.554	3772.54	145089	3.03	0.33	0.782	1.94392
790	ARL13B_KAN583-1_4.tif:0016-0593	3.328	518.766	151	1571	91.262	95.835	0.591	1726.56	66402	3.102	0.322	0.85	0.889661
791	ARL13B_KAN583-1_4.tif:0017-0694	0.39	86.867	24	201	130.263	112.117	0.449	33.88	1303	1.498	0.668	0.6	0.0174577
792	ARL13B_KAN583-1_4.tif:0018-0707	2.964	561.781	126	1767	174.952	114.086	0.439	1665.22	64043	4.011	0.249	0.722	0.858055
793	ARL13B_KAN583-1_4.tif:0019-0765	4.082	543.49	96	1353	34.038	123.753	0.45	2218.66	85328	3.451	0.29	0.719	1.14323
794	ARL13B_KAN583-1_4.tif:0020-0860	1.664	261.594	63	601	203.82	138.572	0.353	435.318	16742	3.956	0.253	0.587	0.224311
795	ARL13B_KAN583-1_4.tif:0021-0891	3.354	987.628	77	3401	149.488	143.819	0.543	3312.7	127404	2.866	0.349	0.804	1.70697
796	ARL13B_KAN583-1_4.tif:0022-0907	3.588	749.768	109	2527	86.723	146.366	0.468	2690.33	103468	4.289	0.233	0.824	1.38627
797	ARL13B_KAN583-1_5.tif:0001-0011	2.34	555.944	152	1719	167.714	1.5	0.51	1300.99	50035	2.695	0.371	0.759	0.670374
798	ARL13B_KAN583-1_5.tif:0002-0098	2.418	353.774	58	1059	210.791	15.644	0.345	855.478	32901	2.653	0.377	0.539	0.440811
799	ARL13B_KAN583-1_5.tif:0003-0110	2.548	475.673	154	1282	109.198	17.872	0.552	1212.09	46616	3.098	0.323	0.797	0.624566
800	ARL13B_KAN583-1_5.tif:0004-0210	4.966	823.147	52	3006	108.395	33.948	0.451	4087.99	157221	3.494	0.286	0.75	2.10646
801	ARL13B_KAN583-1_5.tif:0005-0260	3.146	671.471	125	2225	39.28	41.875	0.569	2112.57	81248	2.999	0.333	0.823	1.08857
802	ARL13B_KAN583-1_5.tif:0006-0424	3.77	682.71	102	2115	131.18	68.06	0.358	2573.97	98993	3.99	0.251	0.611	1.32632
803	ARL13B_KAN583-1_5.tif:0007-0445	3.302	824.15	62	2000	211.981	71.95	0.41	2721.51	104667	4.52	0.221	0.734	1.40234
804	ARL13B_KAN583-1_5.tif:0008-0483	3.38	587.438	25	1851	25.098	78.033	0.46	1985.66	76367	3.558	0.281	0.695	1.02317
805	ARL13B_KAN583-1_5.tif:0009-0583	2.34	654.511	111	1965	34.189	94.157	0.474	1531.65	58906	3.656	0.274	0.735	0.789229
806	ARL13B_KAN583-1_5.tif:0010-0638	2.522	286.536	3	771	158.729	102.89	0.51	722.688	27794	3.58	0.279	0.795	0.372387
807	ARL13B_KAN583-1_5.tif:0011-0742	3.978	1037.2	61	4275	94.09	119.723	0.58	4126.24	158692	3.195	0.313	0.812	2.12617
808	ARL13B_KAN583-1_5.tif:0012-0780	2.028	478.756	156	1276	36.709	125.986	0.474	970.976	37343	4.204	0.238	0.768	0.500325
809	ARL13B_KAN583-1_5.tif:0013-0807	2.912	935.491	99	3185	82.029	130.173	0.493	2724.31	104775	3.252	0.307	0.744	1.40379
810	ARL13B_KAN583-1_5.tif:0014-0813	2.886	869.441	155	2853	149.228	131.042	0.473	2509.36	96508	4.203	0.238	0.801	1.29302
811	ARL13B_KAN583-1_5.tif:0015-0914	2.704	1084.12	141	2967	169.789	147.232	0.566	2931.65	112749	2.943	0.34	0.785	1.51062
812	ARL13B_KAN583-1_5.tif:0016-0930	3.9	530.847	152	1391	201.02	150.051	0.437	2070.43	79627	4.358	0.229	0.779	1.06685
813	ARL13B_KAN583-1_5.tif:0017-0929	3.146	682.636	114	2478	123.781	149.821	0.453	2147.7	82599	3.949	0.253	0.733	1.10667
814	ARL13B_KAN583-1_6.tif:0001-0022	2.756	692.717	150	2071	178.663	3.69	0.386	1909.24	73428	4.201	0.238	0.697	0.983796
815	ARL13B_KAN583-1_6.tif:0002-0122	2.808	570.806	39	1852	125.164	19.91	0.343	1602.92	61647	5.661	0.177	0.713	0.825953
816	ARL13B_KAN583-1_6.tif:0003-0145	1.3	248.84	152	487	6.585	23.43	0.582	323.511	12442	2.649	0.377	0.763	0.166699
817	ARL13B_KAN583-1_6.tif:0004-0228	2.938	421.018	81	1288	31.955	36.878	0.395	1237.02	47575	4.244	0.236	0.727	0.637415
818	ARL13B_KAN583-1_6.tif:0005-0248	3.38	1038.15	43	3717	158.718	40.089	0.41	3509.14	134959	3.422	0.292	0.674	1.80819
819	ARL13B_KAN583-1_6.tif:0006-0252	1.794	389.29	83	1073	95.242	40.561	0.413	698.428	26861	3.922	0.255	0.69	0.359886
820	ARL13B_KAN583-1_6.tif:0007-0279	3.562	320.818	51	1148	213.805	45.195	0.369	1142.82	43952	5.467	0.183	0.723	0.588873
821	ARL13B_KAN583-1_6.tif:0008-0308	2.938	848.85	115	2233	28.541	49.592	0.43	2494.07	95920	4.53	0.221	0.722	1.28515
822	ARL13B_KAN583-1_6.tif:0009-0315	2.86	574.564	62	2179	71.192	50.892	0.457	1643.35	63202	4.52	0.221	0.806	0.846787
823	ARL13B_KAN583-1_6.tif:0010-0318	2.288	694.136	103	1955	82.135	51.404	0.418	1588.28	61084	3.609	0.277	0.715	0.81841
824	ARL13B_KAN583-1_6.tif:0011-0326	3.432	1024.53	144	4093	133.254	52.608	0.432	3516.4	135238	4.482	0.223	0.727	1.81193
825	ARL13B_KAN583-1_6.tif:0012-0335	3.172	745.811	46	2167	195.764	54.154	0.496	2365.86	90989	3.483	0.287	0.767	1.21908
826	ARL13B_KAN583-1_6.tif:0013-0437	2.912	848.161	150	2653	207.644	70.36	0.396	2469.99	94994	4.509	0.222	0.747	1.27274
827	ARL13B_KAN583-1_6.tif:0014-0481	3.354	780.659	95	2483	46.251	77.694	0.396	2618.49	100705	5.127	0.195	0.77	1.34926
828	ARL13B_KAN583-1_6.tif:0015-0495	2.652	671.843	96	2123	118.182	79.972	0.405	1781.84	68528	4.416	0.226	0.739	0.918145
829	ARL13B_KAN583-1_6.tif:0016-0571	2.366	758.67	151	3363	181.092	91.979	0.548	1795.12	69039	3.33	0.3	0.843	0.924992
830	ARL13B_KAN583-1_6.tif:0017-0600	2.912	678.045	28	1951	3.653	96.895	0.44	1974.59	75941	3.087	0.324	0.669	1.01747
831	ARL13B_KAN583-1_6.tif:0018-0628	2.548	532.092	99	1460	61.451	101.25	0.471	1355.85	52145	2.607	0.384	0.645	0.698644
832	ARL13B_KAN583-1_6.tif:0019-0818	0.624	168.333	111	254	217.419	132.03	0.441	105.046	4040	2.746	0.364	0.623	0.0541283
833	ARL13B_KAN583-1_6.tif:0020-0854	3.692	841.5	57	2459	102.508	137.789	0.383	3107.01	119493	4.95	0.202	0.743	1.60098
834	ARL13B_KAN583-1_6.tif:0021-0854	2.522	440.402	109	1233	202.81	137.376	0.363	1110.76	42719	4.578	0.218	0.669	0.572354
835	ARL13B_KAN583-1_6.tif:0022-0876	3.068	1101.41	96	3110	139.301	141.146	0.468	3379.34	129967	4.18	0.239	0.814	1.74131
836	ARL13B_KAN583-1_6.tif:0023-0979	1.638	416.587	124	1329	64.102	157.786	0.379	682.411	26245	4.613	0.217	0.692	0.351633
837	ARL13B_KAN583-1_6.tif:0024-1000	1.768	187.235	70	324	102.313	161.226	0.47	331.052	12732	3.356	0.298	0.69	0.170585
										74637.4				1
846	ARL13B_KAN583-5_1.tif:0001-0020	2.99	359.261	23	1175	44.883	3.381	0.262	1074.26	41315	7.232	0.138	0.641	0.553543
847	ARL13B_KAN583-5_1.tif:0002-0043	2.548	459.01	112	1278	182.028	7.021	0.583	1169.63	44983	2.371	0.422	0.775	0.602687
848	ARL13B_KAN583-5_1.tif:0003-0055	3.458	533.609	58	1636	153.411	8.845	0.519	1845.33	70970	2.247	0.445	0.695	0.950863
849	ARL13B_KAN583-5_1.tif:0004-0092	2.158	581.675	30	1353	2.665	14.764	0.39	1255.33	48279	4.386	0.228	0.755	0.646847
850	ARL13B_KAN583-5_1.tif:0005-0116	2.288	365.534	49	882	82.58	18.842	0.31	836.392	32167	5.938	0.168	0.659	0.430977
851	ARL13B_KAN583-5_1.tif:0006-0151	2.704	605.971	156	1383	7.531	24.419	0.465	1638.64	63021	4.081	0.245	0.727	0.844362
852	ARL13B_KAN583-5_1.tif:0007-0171	4.576	609.744	108	1817	116.696	27.629	0.33	2790.36	107315	6.08	0.164	0.76	1.43782
853	ARL13B_KAN583-5_1.tif:0008-0182	3.094	829.454	98	2492	66.686	29.329	0.567	2566.49	98705	3.362	0.297	0.826	1.32246
854	ARL13B_KAN583-5_1.tif:0009-0224	3.12	376.067	141	894	186.41	36.248	0.442	1173.4	45128	4.396	0.227	0.755	0.60463
855	ARL13B_KAN583-5_1.tif:0010-0308	3.016	289.94	45	901	153.452	49.735	0.308	874.511	33633	4.595	0.218	0.58	0.450618
856	ARL13B_KAN583-5_1.tif:0011-0360	1.56	281.867	125	592	90.684	58.061	0.505	439.738	16912	3.819	0.262	0.755	0.226589
857	ARL13B_KAN583-5_1.tif:0012-0365	1.144	294.045	95	859	43.886	58.838	0.576	336.408	12938	2.353	0.425	0.752	0.173345
858	ARL13B_KAN583-5_1.tif:0013-0391	2.574	367.556	117	702	20.875	62.839	0.541	946.145	36388	3.261	0.307	0.822	0.48753
859	ARL13B_KAN583-5_1.tif:0014-0407	1.872	558.653	68	2400	108.613	65.712	0.533	1045.86	40223	3.022	0.331	0.742	0.538912
860	ARL13B_KAN583-5_1.tif:0015-0441	2.626	413.802	45	1212	175.173	71.162	0.383	1086.71	41794	2.618	0.382	0.592	0.55996
861	ARL13B_KAN583-5_1.tif:0016-0475	1.3	249.38	96	522	55.96	76.658	0.312	324.214	12469	6.057	0.165	0.61	0.167061
862	ARL13B_KAN583-5_1.tif:0017-0496	4.082	558.261	68	1711	81.544	79.894	0.534	2278.96	87647	3.335	0.3	0.842	1.1743
863	ARL13B_KAN583-5_1.tif:0018-0618	3.406	604.611	153	2031	144.58	99.632	0.391	2059.43	79204	3.832	0.261	0.686	1.06118
864	ARL13B_KAN583-5_1.tif:0019-0632	3.276	688.54	140	1721	98.287	101.991	0.415	2255.79	86756	4.414	0.227	0.775	1.16237
865	ARL13B_KAN583-5_1.tif:0020-0635	2.34	559.067	80	1376	36.699	102.198	0.329	1308.3	50316	4.669	0.214	0.726	0.674139
866	ARL13B_KAN583-5_1.tif:0021-0678	3.354	479.791	136	1461	15.244	109.679	0.272	1609.32	61893	4.478	0.223	0.529	0.829249
867	ARL13B_KAN583-5_1.tif:0022-0685	1.222	258.638	134	574	108.712	110.595	0.593	316.075	12156	2.891	0.346	0.79	0.162867
868	ARL13B_KAN583-5_1.tif:0023-0726	3.666	567.376	82	1614	74.768	117.031	0.383	2080.12	80000	4.953	0.202	0.729	1.07185
869	ARL13B_KAN583-5_1.tif:0024-0737	3.978	585.895	91	1850	35.09	118.833	0.418	2330.83	89642	4.066	0.246	0.673	1.20103
870	ARL13B_KAN583-5_1.tif:0025-0856	3.51	301.815	50	602	138.557	137.86	0.472	1059.43	40745	2.765	0.362	0.716	0.545906
871	ARL13B_KAN583-5_1.tif:0026-0857	2.522	855.485	79	2820	175.148	138.292	0.528	2157.66	82982	2.908	0.344	0.833	1.1118
872	ARL13B_KAN583-5_1.tif:0027-0964	3.068	544.169	39	1308	211.984	155.547	0.521	1669.61	64212	3.061	0.327	0.738	0.860319
873	ARL13B_KAN583-5_1.tif:0028-0978	2.158	523.843	151	1154	12.538	157.655	0.583	1130.52	43479	2.728	0.367	0.772	0.582536
874	ARL13B_KAN583-5_2.tif:0001-0021	3.848	520.473	6	2540	114.125	3.563	0.404	2002.9	77030	3.538	0.283	0.67	1.03206
875	ARL13B_KAN583-5_2.tif:0002-0067	0.624	161.083	69	219	51.15	10.784	0.544	100.522	3866	3.228	0.31	0.676	0.0517971
876	ARL13B_KAN583-5_2.tif:0003-0085	4.42	479.476	117	1347	180.919	13.824	0.486	2119.41	81511	3.904	0.256	0.793	1.09209
877	ARL13B_KAN583-5_2.tif:0004-0133	1.508	542.483	151	1375	13.095	21.496	0.554	818.113	31464	3.711	0.269	0.784	0.421558
878	ARL13B_KAN583-5_2.tif:0005-0228	2.808	692.509	160	1809	126.796	36.823	0.594	1944.68	74791	3.09	0.324	0.828	1.00206
879	ARL13B_KAN583-5_2.tif:0006-0261	1.066	216.854	70	386	87.136	42.194	0.421	231.18	8891	4.668	0.214	0.713	0.119123
880	ARL13B_KAN583-5_2.tif:0007-0308	2.652	1028.41	120	3943	160.833	49.676	0.514	2727.51	104898	3.388	0.295	0.75	1.40543
881	ARL13B_KAN583-5_2.tif:0008-0315	1.924	390.216	92	880	17.435	50.831	0.353	750.821	28876	5.572	0.179	0.679	0.386884
882	ARL13B_KAN583-5_2.tif:0009-0412	1.56	282.817	50	609	130.873	66.551	0.305	441.221	16969	6.212	0.161	0.678	0.227352
883	ARL13B_KAN583-5_2.tif:0010-0454	2.496	526.427	10	3140	173.517	73.322	0.555	1314.04	50537	2.921	0.342	0.768	0.6771
884	ARL13B_KAN583-5_2.tif:0011-0483	3.796	419.185	99	912	214.561	78.006	0.542	1591.32	61201	2.38	0.42	0.728	0.819977
885	ARL13B_KAN583-5_2.tif:0012-0493	4.42	912.606	35	2614	140.782	79.664	0.567	4033.96	155143	3.213	0.311	0.85	2.07862
886	ARL13B_KAN583-5_2.tif:0013-0531	0.78	195.6	107	294	6.477	85.672	0.552	152.577	5868	1.918	0.521	0.741	0.0786201
887	ARL13B_KAN583-5_2.tif:0014-0613	3.354	705.457	69	2493	73.444	98.888	0.459	2366.25	91004	3.355	0.298	0.779	1.21928
888	ARL13B_KAN583-5_2.tif:0015-0615	1.326	255.961	94	524	123.241	99.303	0.581	339.424	13054	2.631	0.38	0.773	0.174899
889	ARL13B_KAN583-5_2.tif:0016-0626	3.068	1054.9	131	3308	133.831	100.96	0.466	3236.62	124478	4.038	0.248	0.837	1.66777
890	ARL13B_KAN583-5_2.tif:0017-0768	3.796	703.822	133	3249	156.359	123.774	0.455	2671.87	102758	4.392	0.228	0.736	1.37676
891	ARL13B_KAN583-5_2.tif:0018-0798	2.392	832.022	161	2111	34.488	128.898	0.596	1990.32	76546	2.599	0.385	0.76	1.02557
892	ARL13B_KAN583-5_2.tif:0019-0796	2.054	447.076	105	1489	77.189	128.278	0.37	918.349	35319	5.669	0.176	0.756	0.473208
893	ARL13B_KAN583-5_2.tif:0020-0804	2.756	1216.71	111	4408	86.8	129.914	0.51	3353.45	128971	3.081	0.325	0.765	1.72797
894	ARL13B_KAN583-5_2.tif:0021-0908	3.25	733.68	153	1791	144.807	146.293	0.498	2384.6	91710	3.498	0.286	0.749	1.22874
895	ARL13B_KAN583-5_2.tif:0022-0962	2.132	1129.76	75	3471	73.78	155.199	0.552	2408.78	92640	2.842	0.352	0.788	1.2412
896	ARL13B_KAN583-5_2.tif:0023-1033	1.118	400.488	116	1135	59.222	166.588	0.534	447.773	17221	2.491	0.401	0.705	0.230729
897	ARL13B_KAN583-5_3.tif:0001-0104	2.314	747.382	102	1830	28.252	16.794	0.568	1729.55	66517	3.864	0.259	0.881	0.891202
898	ARL13B_KAN583-5_3.tif:0002-0207	2.574	646.172	133	2056	139.331	33.394	0.56	1663.35	63971	3.151	0.317	0.815	0.85709
899	ARL13B_KAN583-5_3.tif:0003-0304	2.6	574.67	108	1568	21.309	49.039	0.323	1494.23	57467	6.418	0.156	0.66	0.769949
900	ARL13B_KAN583-5_3.tif:0004-0307	2.626	823.149	82	2388	73.494	49.501	0.514	2161.72	83138	3.284	0.304	0.774	1.11389
901	ARL13B_KAN583-5_3.tif:0005-0357	3.484	969.642	125	3386	110.752	57.641	0.538	3378.43	129932	3.405	0.294	0.859	1.74084
902	ARL13B_KAN583-5_3.tif:0006-0460	2.678	442.087	128	1247	162.077	74.292	0.534	1183.98	45535	3.482	0.287	0.831	0.610083
903	ARL13B_KAN583-5_3.tif:0007-0608	2.314	492.09	61	1314	125.241	97.939	0.464	1138.77	43796	4.047	0.247	0.715	0.586783
904	ARL13B_KAN583-5_3.tif:0008-0622	1.196	363	126	918	26.578	100.238	0.489	434.174	16698	3.738	0.267	0.773	0.223722
905	ARL13B_KAN583-5_3.tif:0009-0648	2.86	1404.29	143	3609	52.11	104.569	0.576	4016.51	154472	3.608	0.277	0.87	2.06963
906	ARL13B_KAN583-5_3.tif:0010-0656	0.286	93.909	0	176	149.882	105.861	0.349	26.86	1033	5.697	0.176	0.579	0.0138402
907	ARL13B_KAN583-5_3.tif:0011-0768	2.964	640.07	59	1968	100.609	123.774	0.423	1897.28	72968	3.479	0.287	0.681	0.977633
908	ARL13B_KAN583-5_3.tif:0012-0778	2.756	561.547	44	2221	56.752	125.729	0.386	1547.72	59524	2.872	0.348	0.614	0.797509
909	ARL13B_KAN583-5_3.tif:0013-0816	5.122	560.426	116	1330	204.17	131.505	0.414	2870.68	110404	4.752	0.21	0.812	1.4792
910	ARL13B_KAN583-5_3.tif:0014-0850	2.444	851.277	158	2402	28.649	137.219	0.47	2080.64	80020	4.5	0.222	0.895	1.07212
911	ARL13B_KAN583-5_3.tif:0015-0958	0.962	183.054	111	247	19.409	154.445	0.504	176.109	6773	2.575	0.388	0.673	0.0907454
912	ARL13B_KAN583-5_4.tif:0001-0041	3.25	663.712	102	2923	147.632	6.426	0.432	2157.19	82964	4.044	0.247	0.742	1.11156
913	ARL13B_KAN583-5_4.tif:0002-0049	4.186	418.416	76	1179	122.614	7.873	0.493	1751.6	67365	4.144	0.241	0.845	0.902563
914	ARL13B_KAN583-5_4.tif:0003-0079	3.328	966.469	65	2937	209.16	12.547	0.451	3216.6	123708	3.231	0.31	0.744	1.65745
915	ARL13B_KAN583-5_4.tif:0004-0126	3.094	650.403	133	2213	84.332	20.417	0.474	2012.47	77398	3.765	0.266	0.746	1.03699
916	ARL13B_KAN583-5_4.tif:0005-0188	3.874	647.987	130	1962	132.956	30.073	0.421	2510.45	96550	3.593	0.278	0.656	1.29359
917	ARL13B_KAN583-5_4.tif:0006-0198	2.964	565.939	98	1484	216.33	32.178	0.514	1677.54	64517	3.091	0.323	0.809	0.864405
918	ARL13B_KAN583-5_4.tif:0007-0234	1.742	347.224	121	695	222.967	37.601	0.519	604.9	23264	3.276	0.305	0.757	0.311693
919	ARL13B_KAN583-5_4.tif:0008-0264	4.42	511.918	67	2241	195.648	42.595	0.392	2262.81	87026	2.265	0.442	0.61	1.16598
920	ARL13B_KAN583-5_4.tif:0009-0299	3.198	680.146	50	1779	23.965	48.176	0.429	2175.24	83658	4.413	0.227	0.831	1.12086
921	ARL13B_KAN583-5_4.tif:0010-0310	3.77	408.448	86	954	214.863	49.964	0.523	1539.94	59225	3.403	0.294	0.808	0.793503
922	ARL13B_KAN583-5_4.tif:0011-0326	3.77	378.662	150	752	149.765	52.664	0.431	1427.64	54906	4.473	0.224	0.806	0.735636
923	ARL13B_KAN583-5_4.tif:0012-0363	2.782	515.206	69	1869	43.014	58.69	0.426	1433.39	55127	4.425	0.226	0.695	0.738597
924	ARL13B_KAN583-5_4.tif:0013-0394	2.704	295.692	40	865	95.378	63.429	0.377	799.6	30752	4.852	0.206	0.648	0.412018
925	ARL13B_KAN583-5_4.tif:0014-0432	4.498	727.688	13	3860	114.388	69.757	0.289	3273.34	125890	7.758	0.129	0.685	1.68669
926	ARL13B_KAN583-5_4.tif:0015-0436	4.55	542.777	153	1381	142.475	70.237	0.507	2469.78	94986	2.989	0.335	0.717	1.27263
927	ARL13B_KAN583-5_4.tif:0016-0455	0.624	159.542	78	221	211.13	73.275	0.517	99.56	3829	2.026	0.494	0.649	0.0513013
928	ARL13B_KAN583-5_4.tif:0017-0513	3.25	394.712	105	1078	173.022	82.824	0.448	1282.89	49339	4.18	0.239	0.767	0.661049
929	ARL13B_KAN583-5_4.tif:0018-0555	2.08	257.275	121	474	50.582	89.582	0.417	535.164	20582	4.402	0.227	0.681	0.27576
930	ARL13B_KAN583-5_4.tif:0019-0657	3.12	939.525	129	2701	121.402	106.143	0.57	2931.49	112743	2.677	0.374	0.774	1.51054
931	ARL13B_KAN583-5_4.tif:0020-0709	2.704	309.856	0	1044	33.266	114.497	0.301	837.9	32225	1.249	0.801	0.51	0.431754
932	ARL13B_KAN583-5_4.tif:0021-0715	5.2	456.975	56	1762	173.682	115.449	0.399	2376.41	91395	4.737	0.211	0.752	1.22452
933	ARL13B_KAN583-5_4.tif:0022-0721	2.288	281.398	70	530	209.429	116.494	0.371	643.877	24763	3.69	0.271	0.647	0.331777
934	ARL13B_KAN583-5_4.tif:0023-0755	4.004	920.74	28	3656	151.48	121.832	0.44	3686.87	141794	4.435	0.225	0.792	1.89977
935	ARL13B_KAN583-5_4.tif:0024-0762	1.508	376.483	81	1002	103.709	122.925	0.558	567.77	21836	2.148	0.465	0.817	0.292561
936	ARL13B_KAN583-5_4.tif:0025-0766	2.34	634.2	154	1615	14.203	123.552	0.452	1484.12	57078	4.7	0.213	0.789	0.764737
937	ARL13B_KAN583-5_4.tif:0026-0783	2.496	621.719	122	2989	74.032	126.301	0.415	1551.9	59685	4.719	0.212	0.696	0.799666
938	ARL13B_KAN583-5_4.tif:0027-0998	1.3	273.24	55	730	77.336	160.992	0.454	355.233	13662	3.819	0.262	0.725	0.183045
939	ARL13B_KAN583-5_4.tif:0028-1009	3.744	442.514	123	1165	141.524	162.702	0.505	1656.87	63722	3.982	0.251	0.791	0.853754
940	ARL13B_KAN583-5_4.tif:0029-1033	2.236	444.523	34	1138	131.198	166.843	0.239	994.014	38229	6.655	0.15	0.587	0.512196
941	ARL13B_KAN583-5_4.tif:0030-1035	1.144	593.795	151	1293	108.213	166.967	0.358	679.343	26127	4.879	0.205	0.83	0.350052
942	ARL13B_KAN583-5_5.tif:0001-0021	2.964	717.333	90	2099	40.738	3.375	0.387	2126.3	81776	3.989	0.251	0.743	1.09564
943	ARL13B_KAN583-5_5.tif:0002-0047	2.002	298.494	60	859	129.508	7.898	0.328	597.62	22984	3.824	0.262	0.588	0.307942
944	ARL13B_KAN583-5_5.tif:0003-0060	2.626	569.931	124	2138	85.142	9.727	0.544	1496.73	57563	3.758	0.266	0.802	0.771235
945	ARL13B_KAN583-5_5.tif:0004-0082	1.794	496.391	101	1376	168.486	13.289	0.513	890.58	34251	3.718	0.269	0.734	0.458898
946	ARL13B_KAN583-5_5.tif:0005-0093	3.51	643.644	152	2526	205.757	15.043	0.435	2259.33	86892	4.655	0.215	0.783	1.16419
947	ARL13B_KAN583-5_5.tif:0006-0121	2.756	636.208	110	2221	139.983	19.511	0.462	1753.49	67438	3.912	0.256	0.729	0.903541
948	ARL13B_KAN583-5_5.tif:0007-0209	4.55	515.903	152	1801	182.073	33.502	0.329	2347.5	90283	4.678	0.214	0.629	1.20962
949	ARL13B_KAN583-5_5.tif:0008-0231	2.99	1166.88	10	3817	107.017	37.115	0.401	3489.18	134191	3.542	0.282	0.708	1.7979
950	ARL13B_KAN583-5_5.tif:0009-0245	2.86	688.782	102	1919	36.491	39.688	0.477	1970.04	75766	3.911	0.256	0.769	1.01512
951	ARL13B_KAN583-5_5.tif:0010-0301	2.548	499.694	161	1167	9.966	48.52	0.471	1273.3	48970	4.389	0.228	0.813	0.656105
952	ARL13B_KAN583-5_5.tif:0011-0350	3.068	390.161	42	1501	81.091	56.299	0.318	1197.09	46039	4.754	0.21	0.583	0.616835
953	ARL13B_KAN583-5_5.tif:0012-0482	2.236	389.384	150	944	47.668	77.693	0.47	870.714	33487	4.065	0.246	0.804	0.448662
954	ARL13B_KAN583-5_5.tif:0013-0537	2.912	408.25	10	1124	108.321	86.794	0.303	1188.9	45724	5.855	0.171	0.614	0.612615
955	ARL13B_KAN583-5_5.tif:0014-0547	0.364	60.286	0	182	145.206	88.446	0.24	21.945	844	1.709	0.585	0.4	0.011308
956	ARL13B_KAN583-5_5.tif:0015-0566	3.744	693.958	104	2459	142.994	91.339	0.253	2598.34	99930	8.073	0.124	0.673	1.33887
957	ARL13B_KAN583-5_5.tif:0016-0602	4.914	772.497	47	2443	129.347	96.994	0.335	3796.28	146002	5.211	0.192	0.652	1.95615
958	ARL13B_KAN583-5_5.tif:0017-0628	3.38	1091.24	101	3623	172.916	101.254	0.547	3688.61	141861	3.553	0.281	0.858	1.90067
959	ARL13B_KAN583-5_5.tif:0018-0655	2.21	501.318	71	1232	215.444	105.79	0.443	1107.98	42612	3.841	0.26	0.702	0.57092
960	ARL13B_KAN583-5_5.tif:0019-0714	3.094	772	43	2841	113.105	115.088	0.455	2388.71	91868	2.357	0.424	0.67	1.23086
961	ARL13B_KAN583-5_5.tif:0020-0757	2.574	736.343	85	1972	210.885	121.886	0.381	1895.46	72898	4.198	0.238	0.744	0.976695
962	ARL13B_KAN583-5_5.tif:0021-0855	1.846	261	154	415	34.933	137.89	0.325	481.835	18531	6.767	0.148	0.648	0.24828
963	ARL13B_KAN583-5_5.tif:0022-0929	3.64	434.836	63	1383	170.983	149.802	0.255	1582.9	60877	5.351	0.187	0.588	0.815636
964	ARL13B_KAN583-5_5.tif:0023-0997	0.702	164.741	136	195	2.081	160.769	0.571	115.655	4448	2.307	0.433	0.75	0.0595948
965	ARL13B_KAN583-5_6.tif:0001-0091	3.38	479.869	91	1706	164.905	14.769	0.437	1622.06	62383	4.19	0.239	0.765	0.835814
966	ARL13B_KAN583-5_6.tif:0002-0239	1.196	242.348	23	405	14.66	38.598	0.385	289.865	11148	4.479	0.223	0.836	0.149362
967	ARL13B_KAN583-5_6.tif:0003-0277	3.016	793.802	0	3055	124.896	44.481	0.558	2394.25	92081	2.138	0.468	0.748	1.23371
968	ARL13B_KAN583-5_6.tif:0004-0373	2.99	647.8	155	2254	149.953	60.301	0.428	1937.04	74497	4.637	0.216	0.754	0.998118
969	ARL13B_KAN583-5_6.tif:0005-0422	3.042	570.684	151	1512	13.291	68.056	0.581	1736.12	66770	3.395	0.295	0.851	0.894591
970	ARL13B_KAN583-5_6.tif:0006-0499	3.406	623.115	20	2522	83.854	80.544	0.422	2122.46	81628	4.683	0.214	0.712	1.09366
971	ARL13B_KAN583-5_6.tif:0007-0631	2.912	522.955	111	2113	178.822	101.842	0.473	1522.94	58571	3.444	0.29	0.698	0.78474
972	ARL13B_KAN583-5_6.tif:0008-0678	1.716	197.212	113	289	11.691	109.213	0.539	338.436	13016	3.031	0.33	0.805	0.17439
973	ARL13B_KAN583-5_6.tif:0009-0767	7.254	655.996	12	2406	188.476	123.473	0.18	4758.89	183023	9.354	0.107	0.569	2.45216
974	ARL13B_KAN583-5_6.tif:0010-0886	3.822	414.626	36	1164	91.596	143.025	0.254	1584.8	60950	7.468	0.134	0.614	0.816614
975	ARL13B_KAN583-5_6.tif:0011-0956	3.224	841.363	22	2829	177.626	154.258	0.394	2712.72	104329	4.561	0.219	0.721	1.39781
976	ARL13B_KAN583-5_6.tif:0012-1011	3.51	656.348	64	2132	135.072	163.123	0.331	2303.92	88607	6.024	0.166	0.724	1.18717
										63197.3				0.846724
977	ARL13B_KAN583-6_1.tif:0001-0038	3.198	678.935	104	2572	185.543	6.167	0.503	2171.36	83509	3.62	0.276	0.815	1.11886
978	ARL13B_KAN583-6_1.tif:0002-0052	2.834	868.917	18	3268	90.199	8.436	0.54	2462.66	94712	3.087	0.324	0.801	1.26896
979	ARL13B_KAN583-6_1.tif:0003-0068	3.198	257.187	115	416	200.749	11.052	0.494	822.534	31634	4.125	0.242	0.82	0.423836
980	ARL13B_KAN583-6_1.tif:0004-0086	3.848	685.662	30	2712	174.918	13.9	0.4	2638.59	101478	4.253	0.235	0.7	1.35961
981	ARL13B_KAN583-6_1.tif:0005-0089	1.872	401.444	137	1030	11.597	14.353	0.596	751.549	28904	3.516	0.284	0.847	0.387259
982	ARL13B_KAN583-6_1.tif:0006-0101	3.146	630.934	64	1929	112.057	16.304	0.437	1985.04	76343	4.775	0.209	0.804	1.02285
983	ARL13B_KAN583-6_1.tif:0007-0135	2.418	691.699	61	2600	55.936	21.754	0.447	1672.63	64328	4.015	0.249	0.741	0.861873
984	ARL13B_KAN583-6_1.tif:0008-0175	2.704	817.365	156	3264	195.097	28.258	0.436	2210.29	85006	4.941	0.202	0.748	1.13892
985	ARL13B_KAN583-6_1.tif:0009-0204	2.288	589.636	6	1621	120.194	33.218	0.332	1349.17	51888	4.676	0.214	0.696	0.695201
986	ARL13B_KAN583-6_1.tif:0010-0216	3.224	843.258	70	2604	102.758	35.077	0.4	2718.83	104564	4.196	0.238	0.821	1.40096
987	ARL13B_KAN583-6_1.tif:0011-0227	3.302	367.606	58	1118	147.718	36.642	0.51	1213.91	46686	3.383	0.296	0.772	0.625504
988	ARL13B_KAN583-6_1.tif:0012-0266	2.73	595.933	94	2021	167.277	42.886	0.508	1627	62573	3.748	0.267	0.833	0.83836
989	ARL13B_KAN583-6_1.tif:0013-0356	3.094	621.899	84	1930	196.329	57.431	0.373	1924.27	74006	4.775	0.209	0.702	0.99154
990	ARL13B_KAN583-6_1.tif:0014-0368	3.718	487.699	85	1810	163.782	59.424	0.533	1813.38	69741	3.426	0.292	0.797	0.934397
991	ARL13B_KAN583-6_1.tif:0015-0369	0.806	216.871	45	443	41.402	59.519	0.596	174.809	6723	1.86	0.538	0.697	0.0900754
992	ARL13B_KAN583-6_1.tif:0016-0399	1.378	244.906	120	480	89.76	64.377	0.466	337.5	12980	2.22	0.451	0.675	0.173907
993	ARL13B_KAN583-6_1.tif:0017-0416	2.782	924.458	124	2830	132.731	67.219	0.508	2572	98917	3.548	0.282	0.811	1.3253
994	ARL13B_KAN583-6_1.tif:0018-0460	3.354	891.349	150	3172	183.401	74.306	0.554	2989.76	114984	3.792	0.264	0.799	1.54057
995	ARL13B_KAN583-6_1.tif:0019-0480	2.002	553.143	119	1399	12.168	77.47	0.51	1107.46	42592	4.359	0.229	0.842	0.570652
996	ARL13B_KAN583-6_1.tif:0020-0490	3.432	474.356	114	1851	141.529	79.099	0.368	1628.09	62615	5.848	0.171	0.75	0.838922
997	ARL13B_KAN583-6_1.tif:0021-0528	2.652	240.784	62	545	66.329	85.195	0.475	638.598	24560	3.352	0.298	0.689	0.329057
998	ARL13B_KAN583-6_1.tif:0022-0566	2.444	308.777	74	560	51.494	91.557	0.302	754.695	29025	4.624	0.216	0.558	0.38888
999	ARL13B_KAN583-6_1.tif:0023-0595	4.082	1001.62	156	4080	170.527	95.843	0.571	4088.85	157254	2.793	0.358	0.789	2.10691
1000	ARL13B_KAN583-6_1.tif:0024-0636	2.366	472.868	59	1550	33.743	102.627	0.409	1118.87	43031	5.033	0.199	0.74	0.576534
1001	ARL13B_KAN583-6_1.tif:0025-0690	3.458	623.143	81	1938	81.214	111.386	0.436	2154.96	82878	4.302	0.232	0.758	1.11041
1002	ARL13B_KAN583-6_1.tif:0026-0769	3.484	499.597	109	1340	181.614	124.008	0.439	1740.7	66946	2.538	0.394	0.64	0.896949
1003	ARL13B_KAN583-6_1.tif:0027-0769	1.482	229.649	3	403	149.477	123.742	0.586	340.36	13090	1.629	0.614	0.722	0.175381
1004	ARL13B_KAN583-6_1.tif:0028-0801	3.068	469.305	142	1163	192.386	129.161	0.434	1439.91	55378	3.863	0.259	0.749	0.74196
1005	ARL13B_KAN583-6_1.tif:0029-0916	2.522	620.742	111	1690	187.119	147.594	0.403	1565.61	60212	4.388	0.228	0.688	0.806727
1006	ARL13B_KAN583-6_1.tif:0030-0934	3.016	698.19	121	2845	140.541	150.776	0.504	2105.87	80990	4.09	0.244	0.835	1.08511
1007	ARL13B_KAN583-6_1.tif:0031-0946	2.366	512.56	131	1370	91.568	152.54	0.439	1212.79	46643	4.775	0.209	0.719	0.624928
1008	ARL13B_KAN583-6_2.tif:0001-0046	1.82	522.757	151	985	33.017	7.521	0.437	951.475	36593	4.176	0.239	0.718	0.490277
1009	ARL13B_KAN583-6_2.tif:0002-0051	3.146	558.793	63	1399	165.68	7.962	0.501	1758.07	67614	2.968	0.337	0.815	0.905899
1010	ARL13B_KAN583-6_2.tif:0003-0066	3.718	600.301	134	2203	92.108	10.971	0.352	2232.05	85843	5.289	0.189	0.688	1.15013
1011	ARL13B_KAN583-6_2.tif:0004-0078	3.614	524.475	106	1441	47.19	12.194	0.514	1895.57	72902	2.571	0.389	0.825	0.976749
1012	ARL13B_KAN583-6_2.tif:0005-0078	2.132	592.671	154	1383	25.161	12.686	0.586	1263.65	48599	3.363	0.297	0.777	0.651134
1013	ARL13B_KAN583-6_2.tif:0006-0103	3.848	765.365	132	2553	194.398	16.88	0.458	2945.3	113274	2.823	0.354	0.67	1.51766
1014	ARL13B_KAN583-6_2.tif:0007-0103	2.314	312.393	123	635	17.302	16.63	0.583	722.922	27803	2.82	0.355	0.86	0.372507
1015	ARL13B_KAN583-6_2.tif:0008-0177	3.172	414.443	0	1303	106.117	28.498	0.448	1314.69	50562	3.581	0.279	0.674	0.677435
1016	ARL13B_KAN583-6_2.tif:0009-0179	3.432	687.227	135	1891	134.211	29.013	0.541	2358.71	90714	2.755	0.363	0.744	1.2154
1017	ARL13B_KAN583-6_2.tif:0010-0224	3.38	443.7	27	1283	64.271	36.336	0.378	1499.8	57681	3.093	0.323	0.648	0.772816
1018	ARL13B_KAN583-6_2.tif:0011-0242	3.042	464.239	88	1498	134.89	38.99	0.478	1412.3	54316	3.86	0.259	0.785	0.727731
1019	ARL13B_KAN583-6_2.tif:0012-0252	2.34	941.156	147	3111	106.02	40.735	0.59	2202.44	84704	2.697	0.371	0.796	1.13487
1020	ARL13B_KAN583-6_2.tif:0013-0260	5.096	434.214	104	870	208.46	41.764	0.438	2212.89	85106	3.259	0.307	0.69	1.14026
1021	ARL13B_KAN583-6_2.tif:0014-0265	3.146	368.397	73	954	170.76	42.636	0.457	1159.05	44576	2.095	0.477	0.67	0.597234
1022	ARL13B_KAN583-6_2.tif:0015-0262	3.224	439.298	18	1118	177.64	42.336	0.478	1416.38	54473	2.928	0.342	0.727	0.729835
1023	ARL13B_KAN583-6_2.tif:0016-0322	2.392	374.533	68	1016	217.914	52.022	0.31	895.936	34457	2.693	0.371	0.529	0.461658
1024	ARL13B_KAN583-6_2.tif:0017-0408	3.224	1136.57	35	4945	112.645	65.81	0.589	3664.51	140934	3.073	0.325	0.838	1.88825
1025	ARL13B_KAN583-6_2.tif:0018-0422	3.354	711.264	158	2926	155.828	68.233	0.479	2385.72	91753	3.407	0.293	0.707	1.22932
1026	ARL13B_KAN583-6_2.tif:0019-0556	3.094	579.479	72	1816	53.061	89.79	0.404	1793.02	68958	4.109	0.243	0.69	0.923906
1027	ARL13B_KAN583-6_2.tif:0020-0559	2.73	740.543	109	2706	80.306	90.026	0.572	2021.8	77757	2.358	0.424	0.798	1.0418
1028	ARL13B_KAN583-6_2.tif:0021-0604	2.418	551.172	58	1929	43.003	97.288	0.469	1332.81	51259	3.917	0.255	0.741	0.686773
1029	ARL13B_KAN583-6_2.tif:0022-0610	3.276	762.968	69	2140	165.642	98.21	0.49	2499.64	96134	3.241	0.309	0.718	1.28801
1030	ARL13B_KAN583-6_2.tif:0023-0615	1.976	568.316	75	1846	128.521	98.986	0.517	1123.06	43192	3.48	0.287	0.809	0.578691
1031	ARL13B_KAN583-6_2.tif:0024-0669	3.718	849.378	82	2628	53.348	107.907	0.487	3158.18	121461	4.577	0.218	0.932	1.62735
1032	ARL13B_KAN583-6_2.tif:0025-0674	2.496	1092.78	158	4272	97.995	108.651	0.593	2727.75	104907	3.003	0.333	0.803	1.40555
1033	ARL13B_KAN583-6_2.tif:0026-0719	3.432	710.553	0	2596	74.011	115.863	0.563	2438.76	93793	3.423	0.292	0.802	1.25665
1034	ARL13B_KAN583-6_2.tif:0027-0753	3.042	1054.58	114	3830	60.111	121.15	0.339	3208.23	123386	4.293	0.233	0.699	1.65314
1035	ARL13B_KAN583-6_2.tif:0028-0763	2.08	474.825	153	1336	181.394	123.133	0.474	987.695	37986	4.131	0.242	0.773	0.50894
1036	ARL13B_KAN583-6_2.tif:0029-0769	2.132	552.098	96	1454	3.103	124.29	0.525	1177.14	45272	2.804	0.357	0.788	0.606559
1037	ARL13B_KAN583-6_2.tif:0030-0856	2.73	823.038	70	2553	102.594	138.049	0.485	2247.03	86419	3.674	0.272	0.724	1.15785
1038	ARL13B_KAN583-6_2.tif:0031-0904	4.082	427.981	65	812	203.035	146.003	0.534	1747.12	67193	2.731	0.366	0.734	0.900259
1039	ARL13B_KAN583-6_2.tif:0032-0911	1.456	285.089	85	735	135.64	146.913	0.549	415.115	15965	2.623	0.381	0.704	0.213901
1040	ARL13B_KAN583-6_2.tif:0033-0976	3.432	449.485	97	1581	182.349	157.616	0.439	1542.72	59332	4.068	0.246	0.815	0.794936
1041	ARL13B_KAN583-6_2.tif:0034-1003	1.95	427.747	20	1224	33.999	161.864	0.588	834.156	32081	2.351	0.425	0.773	0.429825
1042	ARL13B_KAN583-6_3.tif:0001-0028	4.212	725.809	152	2729	108.106	4.773	0.39	3057.29	117581	4.682	0.214	0.695	1.57536
1043	ARL13B_KAN583-6_3.tif:0002-0082	2.392	634.815	154	1557	35.833	13.031	0.43	1518.57	58403	4.109	0.243	0.697	0.782489
1044	ARL13B_KAN583-6_3.tif:0003-0086	2.782	432.477	73	1678	188.809	13.951	0.555	1203.22	46275	3.5	0.286	0.833	0.619997
1045	ARL13B_KAN583-6_3.tif:0004-0163	2.132	177.524	125	244	29.469	26.307	0.57	378.505	14557	1.594	0.628	0.729	0.195036
1046	ARL13B_KAN583-6_3.tif:0005-0251	2.678	414.932	59	1115	20.8	40.64	0.417	1111.26	42738	3.941	0.254	0.698	0.572608
1047	ARL13B_KAN583-6_3.tif:0006-0261	4.472	689.797	120	2390	123.668	42.384	0.466	3084.96	118645	3.807	0.263	0.808	1.58962
1048	ARL13B_KAN583-6_3.tif:0007-0295	0.754	164	96	264	219.297	47.666	0.328	123.663	4756	4.212	0.237	0.644	0.0637214
1049	ARL13B_KAN583-6_3.tif:0008-0302	4.056	729.647	47	2547	104.333	48.665	0.426	2959.63	113825	4.564	0.219	0.778	1.52504
1050	ARL13B_KAN583-6_3.tif:0009-0363	4.16	802.4	22	3244	150.299	58.531	0.532	3338.18	128384	3.516	0.284	0.872	1.7201
1051	ARL13B_KAN583-6_3.tif:0010-0377	3.458	646.316	31	2256	69.754	60.503	0.456	2235.09	85960	2.348	0.426	0.646	1.1517
1052	ARL13B_KAN583-6_3.tif:0011-0377	2.184	411.048	113	925	55.52	60.676	0.417	897.782	34528	2.363	0.423	0.596	0.46261
1053	ARL13B_KAN583-6_3.tif:0012-0421	2.418	199.204	113	279	41.364	67.963	0.557	481.705	18526	2.797	0.357	0.805	0.248213
1054	ARL13B_KAN583-6_3.tif:0013-0573	3.276	308.714	147	591	13.728	92.355	0.446	1011.41	38898	4.206	0.238	0.775	0.521159
1055	ARL13B_KAN583-6_3.tif:0014-0601	3.718	474.42	80	1423	144.546	97.031	0.579	1764	67842	2.877	0.348	0.799	0.908954
1056	ARL13B_KAN583-6_3.tif:0015-0601	3.718	287.028	123	632	186.949	97.023	0.483	1067.23	41045	3.75	0.267	0.769	0.549925
1057	ARL13B_KAN583-6_3.tif:0016-0703	2.054	366.013	151	778	13.54	113.458	0.428	751.835	28915	4.57	0.219	0.731	0.387406
1058	ARL13B_KAN583-6_3.tif:0017-0725	3.172	569.721	54	2332	202.441	116.996	0.446	1807.27	69506	4.385	0.228	0.787	0.931249
1059	ARL13B_KAN583-6_3.tif:0018-0746	3.666	658.844	14	2267	36.528	120.256	0.471	2415.47	92897	2.993	0.334	0.678	1.24464
1060	ARL13B_KAN583-6_3.tif:0019-0790	3.068	409.432	156	1228	174.369	127.371	0.526	1256.21	48313	3.489	0.287	0.811	0.647303
1061	ARL13B_KAN583-6_3.tif:0020-0812	2.678	349.039	129	797	63.721	131.014	0.598	934.782	35951	3.116	0.321	0.821	0.481675
1062	ARL13B_KAN583-6_3.tif:0021-0822	2.236	468.128	153	1399	212.171	132.598	0.575	1046.8	40259	3.724	0.269	0.839	0.539394
1063	ARL13B_KAN583-6_3.tif:0022-0931	2.704	638.558	156	2027	59.352	150.308	0.414	1726.76	66410	4.552	0.22	0.776	0.889768
1064	ARL13B_KAN583-6_3.tif:0023-0937	3.068	661.008	131	1650	8.554	150.848	0.367	2028.1	77999	3.674	0.272	0.628	1.04504
1065	ARL13B_KAN583-6_3.tif:0024-0952	4.29	308.848	75	573	217.969	153.682	0.304	1325.04	50960	6.46	0.155	0.688	0.682767
1066	ARL13B_KAN583-6_3.tif:0025-0963	2.522	300.196	125	667	89.102	155.434	0.342	757.14	29119	4.667	0.214	0.636	0.390139
1067	ARL13B_KAN583-6_4.tif:0001-0028	1.3	312.4	108	950	58.866	4.451	0.507	406.144	15620	2.944	0.34	0.719	0.209278
1068	ARL13B_KAN583-6_4.tif:0002-0060	3.042	1163.39	115	3855	109.709	9.463	0.474	3539.26	136117	3.267	0.306	0.724	1.82371
1069	ARL13B_KAN583-6_4.tif:0003-0208	3.822	709.327	141	2093	38.316	33.729	0.41	2711.21	104271	5.545	0.18	0.801	1.39703
1070	ARL13B_KAN583-6_4.tif:0004-0211	3.9	662.6	139	1855	189.634	33.993	0.439	2584.3	99390	4.575	0.219	0.779	1.33164
1071	ARL13B_KAN583-6_4.tif:0005-0328	2.21	273.024	0	602	73.918	53.065	0.355	603.418	23207	3.762	0.266	0.601	0.31093
1072	ARL13B_KAN583-6_4.tif:0006-0346	3.952	732.211	6	2628	208.208	55.879	0.517	2893.87	111296	2.992	0.334	0.736	1.49116
1073	ARL13B_KAN583-6_4.tif:0007-0410	2.808	517.111	37	1594	65.017	66.395	0.441	1452.13	55848	2.693	0.371	0.667	0.748257
1074	ARL13B_KAN583-6_4.tif:0008-0559	4.134	380.421	82	1259	176.731	90.018	0.362	1572.76	60487	5.387	0.186	0.734	0.810411
1075	ARL13B_KAN583-6_4.tif:0009-0599	3.172	507.549	154	1546	67.977	96.68	0.331	1610.04	61921	5.739	0.174	0.637	0.829624
1076	ARL13B_KAN583-6_4.tif:0010-0600	3.978	695.288	123	2849	101.646	96.628	0.309	2766.02	106379	5.819	0.172	0.628	1.42528
1077	ARL13B_KAN583-6_4.tif:0011-0622	1.482	333.965	86	973	38.031	100.432	0.586	494.966	19036	2.667	0.375	0.826	0.255046
1078	ARL13B_KAN583-6_4.tif:0012-0620	2.522	392.33	150	1104	130.924	100.004	0.518	989.516	38056	3.55	0.282	0.779	0.509878
1079	ARL13B_KAN583-6_4.tif:0013-0626	3.718	624.713	106	1750	211.173	100.957	0.549	2322.82	89334	3.512	0.285	0.867	1.19691
1080	ARL13B_KAN583-6_4.tif:0014-0678	0.26	168.5	149	197	86.414	109.344	0.579	43.813	1685	2.464	0.406	0.645	0.0225758
1081	ARL13B_KAN583-6_4.tif:0015-0716	3.744	564.174	65	2302	73.06	115.639	0.333	2112.39	81241	5.348	0.187	0.662	1.08848
1082	ARL13B_KAN583-6_4.tif:0016-0720	2.47	723.032	151	2447	123.313	116.033	0.538	1786	68688	3.568	0.28	0.802	0.920289
1083	ARL13B_KAN583-6_4.tif:0017-0790	3.64	368.664	74	1044	117.296	127.364	0.269	1342.02	51613	5.628	0.178	0.533	0.691516
1084	ARL13B_KAN583-6_4.tif:0018-0831	2.626	378.871	151	930	26.328	134.06	0.502	994.976	38266	3.259	0.307	0.815	0.512692
1085	ARL13B_KAN583-6_4.tif:0019-0894	2.418	700.161	49	2045	85.389	144.575	0.436	1693.09	65115	3.161	0.316	0.762	0.872417
1086	ARL13B_KAN583-6_4.tif:0020-0915	2.392	508.641	142	1558	139.38	147.649	0.529	1216.74	46795	3.939	0.254	0.818	0.626964
1087	ARL13B_KAN583-6_4.tif:0021-0938	2.938	598.876	87	2103	92.714	151.228	0.383	1759.6	67673	4.579	0.218	0.642	0.90669
1088	ARL13B_KAN583-6_4.tif:0022-0950	0.312	172.667	100	247	161.25	153.188	0.503	53.875	2072	3.332	0.3	0.632	0.0277609
1089	ARL13B_KAN583-6_4.tif:0023-1003	2.21	420.271	63	1403	120.923	161.763	0.366	928.854	35723	4.122	0.243	0.605	0.47862
1090	ARL13B_KAN583-6_5.tif:0001-0082	0.624	179.5	126	259	92.228	13.236	0.474	112.015	4308	2.731	0.366	0.585	0.057719
1091	ARL13B_KAN583-6_5.tif:0002-0124	3.198	719.821	148	2825	137.264	19.998	0.522	2302.13	88538	3.876	0.258	0.757	1.18624
1092	ARL13B_KAN583-6_5.tif:0003-0136	1.924	810.365	153	2047	184.446	21.878	0.597	1559.24	59967	3.324	0.301	0.846	0.803444
1093	ARL13B_KAN583-6_5.tif:0004-0157	1.95	804.04	163	2739	54.888	25.442	0.581	1567.97	60303	3.28	0.305	0.815	0.807946
1094	ARL13B_KAN583-6_5.tif:0005-0178	2.964	439.684	67	1311	211.215	28.579	0.536	1303.3	50124	2.718	0.368	0.76	0.671567
1095	ARL13B_KAN583-6_5.tif:0006-0203	2.262	406.529	8	1545	180.451	32.699	0.427	919.623	35368	3.402	0.294	0.685	0.473864
1096	ARL13B_KAN583-6_5.tif:0007-0366	1.456	342.679	97	1063	191.902	58.876	0.502	498.97	19190	3.64	0.275	0.752	0.25711
1097	ARL13B_KAN583-6_5.tif:0008-0452	2.834	491.422	111	1238	80.516	72.732	0.542	1392.77	53565	2.885	0.347	0.813	0.717669
1098	ARL13B_KAN583-6_5.tif:0009-0499	3.432	742.364	75	2509	155.355	80.797	0.378	2547.95	97992	3.393	0.295	0.653	1.31291
1099	ARL13B_KAN583-6_5.tif:0010-0686	2.106	412.062	101	869	95.797	110.571	0.302	867.854	33377	7.072	0.141	0.6	0.447188
1100	ARL13B_KAN583-6_5.tif:0011-0751	4.134	401.623	138	1523	66.564	121.023	0.341	1660.41	63858	5.493	0.182	0.662	0.855576
1101	ARL13B_KAN583-6_5.tif:0012-0767	3.12	374.492	70	788	24.15	123.492	0.512	1168.48	44939	2.056	0.486	0.736	0.602097
1102	ARL13B_KAN583-6_5.tif:0013-0910	2.132	582.061	89	1438	60.174	146.767	0.552	1241.03	47729	3.637	0.275	0.812	0.639478
1103	ARL13B_KAN583-6_5.tif:0014-0951	3.51	187.274	104	305	77.069	153.305	0.491	657.372	25282	3.312	0.302	0.754	0.338731
1104	ARL13B_KAN583-6_5.tif:0015-0963	2.782	663.019	23	1879	102.782	155.281	0.423	1844.63	70943	4.833	0.207	0.775	0.950502
1105	ARL13B_KAN583-6_5.tif:0016-0964	1.456	197.464	43	347	217.437	155.344	0.333	287.525	11058	3.849	0.26	0.533	0.148156
1106	ARL13B_KAN583-6_6.tif:0001-0036	4.394	396.793	54	849	60.48	5.589	0.459	1743.61	67058	3.77	0.265	0.79	0.89845
1107	ARL13B_KAN583-6_6.tif:0002-0037	1.898	338.26	66	756	212.727	6.131	0.449	642.057	24693	4.096	0.244	0.756	0.330839
1108	ARL13B_KAN583-6_6.tif:0003-0046	3.198	340.098	115	785	44.419	7.452	0.398	1087.7	41832	4.936	0.203	0.741	0.560469
1109	ARL13B_KAN583-6_6.tif:0004-0073	3.328	378.164	28	952	172.131	11.771	0.296	1258.61	48405	5.813	0.172	0.651	0.648535
1110	ARL13B_KAN583-6_6.tif:0005-0079	1.95	510.947	119	1166	146.315	12.858	0.555	996.406	38321	2.756	0.363	0.798	0.513429
1111	ARL13B_KAN583-6_6.tif:0006-0175	3.718	407.944	94	1110	122.105	28.445	0.332	1516.83	58336	5.237	0.191	0.641	0.781592
1112	ARL13B_KAN583-6_6.tif:0007-0165	3.562	996.679	63	4250	96.634	26.553	0.478	3550.38	136545	3.712	0.269	0.801	1.82944
1113	ARL13B_KAN583-6_6.tif:0008-0178	3.25	850.792	51	2295	99.772	28.684	0.538	2765.24	106349	3.339	0.299	0.799	1.42487
1114	ARL13B_KAN583-6_6.tif:0009-0205	2.262	330.276	109	765	193.317	32.977	0.309	747.129	28734	4.371	0.229	0.567	0.384981
1115	ARL13B_KAN583-6_6.tif:0010-0248	2.392	419.902	45	1301	32.553	40.104	0.537	1004.47	38631	3.799	0.263	0.825	0.517582
1116	ARL13B_KAN583-6_6.tif:0011-0253	3.874	370.027	52	1195	172.514	40.824	0.452	1433.57	55134	4.88	0.205	0.874	0.738691
1117	ARL13B_KAN583-6_6.tif:0012-0289	0.858	268.818	150	716	205.078	46.555	0.56	230.66	8871	3.495	0.286	0.717	0.118855
1118	ARL13B_KAN583-6_6.tif:0013-0323	2.808	418.778	137	1465	45.617	52.127	0.309	1176	45228	6.44	0.155	0.647	0.605969
1119	ARL13B_KAN583-6_6.tif:0014-0335	2.574	429.707	152	843	72.269	54.088	0.426	1106.13	42541	4.395	0.228	0.739	0.569969
1120	ARL13B_KAN583-6_6.tif:0015-0332	3.588	536.109	88	1328	215.044	53.706	0.512	1923.67	73983	3.325	0.301	0.746	0.991232
1121	ARL13B_KAN583-6_6.tif:0016-0336	3.926	845.464	151	3090	155.528	53.986	0.487	3319.49	127665	3.275	0.305	0.731	1.71047
1122	ARL13B_KAN583-6_6.tif:0017-0376	3.952	589.151	86	1723	40.672	60.338	0.376	2328.47	89551	3.86	0.259	0.615	1.19981
1123	ARL13B_KAN583-6_6.tif:0018-0434	4.498	716.838	63	2252	96.372	70.215	0.402	3224.53	124013	4.473	0.224	0.759	1.66154
1124	ARL13B_KAN583-6_6.tif:0019-0462	5.096	933.026	142	3068	177.92	74.528	0.506	4754.98	182873	3.835	0.261	0.815	2.45015
1125	ARL13B_KAN583-6_6.tif:0020-0490	2.886	404.514	66	998	34.04	79.041	0.546	1167.5	44901	3.182	0.314	0.799	0.601588
1126	ARL13B_KAN583-6_6.tif:0021-0504	3.9	610.18	59	2484	41.084	81.565	0.506	2379.84	91527	3.247	0.308	0.746	1.22629
1127	ARL13B_KAN583-6_6.tif:0022-0587	3.588	604.703	101	2314	126.145	94.849	0.423	2169.8	83449	4.714	0.212	0.742	1.11806
1128	ARL13B_KAN583-6_6.tif:0023-0616	4.03	483.284	46	1696	74.565	99.265	0.434	1947.75	74909	4.423	0.226	0.726	1.00364
1129	ARL13B_KAN583-6_6.tif:0024-0640	2.548	576.429	14	2075	43.829	102.937	0.425	1468.83	56490	3.684	0.271	0.698	0.756859
1130	ARL13B_KAN583-6_6.tif:0025-0649	3.666	768.142	134	2765	100.235	104.749	0.537	2816.18	108308	3.536	0.283	0.806	1.45112
1131	ARL13B_KAN583-6_6.tif:0026-0741	2.288	343.023	38	1193	90.065	119.73	0.371	784.883	30186	5.418	0.185	0.736	0.404435
1132	ARL13B_KAN583-6_6.tif:0027-0799	3.276	560.651	73	2517	68.016	128.761	0.401	1836.8	70642	5.441	0.184	0.754	0.946469
1133	ARL13B_KAN583-6_6.tif:0028-0814	2.782	393.645	55	1336	22.372	131.389	0.258	1095.19	42120	7.233	0.138	0.569	0.564328
1134	ARL13B_KAN583-6_6.tif:0029-0820	2.626	543.693	120	1646	204.895	132.141	0.566	1427.82	54913	3.07	0.326	0.795	0.73573
1135	ARL13B_KAN583-6_6.tif:0030-0838	2.47	368.453	79	895	148.877	135.132	0.451	910.133	35003	3.595	0.278	0.72	0.468974
1136	ARL13B_KAN583-6_6.tif:0031-0884	2.86	508.009	39	2155	58.176	142.438	0.484	1452.99	55881	3.734	0.268	0.761	0.748699
1137	ARL13B_KAN583-6_6.tif:0032-0934	3.328	617.562	35	2084	101.462	150.691	0.481	2055.37	79048	4.013	0.249	0.79	1.05909
1138	ARL13B_KAN583-6_6.tif:0033-0964	1.274	385.755	160	930	12.503	155.568	0.521	491.482	18902	2.842	0.352	0.721	0.253251
1139	ARL13B_KAN583-6_6.tif:0034-1020	3.848	757.777	10	2796	171.038	164.33	0.453	2916.1	112151	4.154	0.241	0.74	1.50261
										62926.7				0.843098
1140	ARL13B_KAN583-7_1.tif:0001-0134	3.874	1363.66	102	5151	166.839	21.634	0.488	5283.13	203185	3.311	0.302	0.762	2.72229
1141	ARL13B_KAN583-7_1.tif:0002-0220	2.626	686.475	90	2718	98.897	35.536	0.566	1802.79	69334	3.401	0.294	0.786	0.928944
1142	ARL13B_KAN583-7_1.tif:0003-0279	3.536	797.279	36	3199	128.168	44.935	0.461	2819.35	108430	4.27	0.234	0.807	1.45276
1143	ARL13B_KAN583-7_1.tif:0004-0282	2.678	1010.5	90	2937	215.731	45.429	0.507	2706.27	104081	3.366	0.297	0.772	1.39449
1144	ARL13B_KAN583-7_1.tif:0005-0309	1.144	173.682	27	298	155.068	49.878	0.431	198.704	7642	1.498	0.667	0.587	0.102388
1145	ARL13B_KAN583-7_1.tif:0006-0344	4.836	734.027	23	2137	100.164	55.303	0.357	3549.97	136529	4.217	0.237	0.669	1.82923
1146	ARL13B_KAN583-7_1.tif:0007-0374	4.342	1136.05	35	4015	188.051	60.281	0.412	4933.04	189721	4.802	0.208	0.829	2.5419
1147	ARL13B_KAN583-7_1.tif:0008-0389	2.782	640.168	69	1594	11.41	62.679	0.426	1781.06	68498	4.256	0.235	0.73	0.917743
1148	ARL13B_KAN583-7_1.tif:0009-0438	1.274	228.286	125	469	73.288	70.833	0.504	290.854	11186	2.303	0.434	0.76	0.149871
1149	ARL13B_KAN583-7_1.tif:0010-0601	1.014	211.974	105	484	56.32	97.017	0.503	214.955	8267	2.657	0.376	0.639	0.110762
1150	ARL13B_KAN583-7_1.tif:0011-0628	0.676	162	69	242	4.738	101.37	0.534	109.519	4212	3.283	0.305	0.743	0.0564328
1151	ARL13B_KAN583-7_1.tif:0012-0672	3.692	877.817	63	2903	82.925	108.409	0.435	3241.09	124650	4.872	0.205	0.843	1.67007
1152	ARL13B_KAN583-7_1.tif:0013-0783	1.144	345.114	34	927	161.107	126.277	0.564	394.834	15185	2.857	0.35	0.846	0.20345
1153	ARL13B_KAN583-7_1.tif:0014-0821	3.172	429.32	133	1002	53.173	132.448	0.338	1361.88	52377	5.831	0.172	0.703	0.701752
1154	ARL13B_KAN583-7_1.tif:0015-0898	3.328	831.969	100	2722	119.563	144.585	0.47	2768.96	106492	2.825	0.354	0.699	1.42679
1155	ARL13B_KAN583-7_1.tif:0016-0906	3.146	694.107	153	1811	216.45	146.194	0.483	2183.79	83987	4.262	0.235	0.776	1.12527
1156	ARL13B_KAN583-7_2.tif:0001-0014	4.056	1093.85	90	3563	109.759	2.431	0.476	4436.93	170641	2.252	0.444	0.686	2.28627
1157	ARL13B_KAN583-7_2.tif:0002-0037	3.354	665.612	67	1690	26.487	5.959	0.394	2232.6	85864	5.029	0.199	0.752	1.15041
1158	ARL13B_KAN583-7_2.tif:0003-0059	3.016	359.578	85	815	209.977	9.532	0.349	1084.55	41711	4.942	0.202	0.737	0.558848
1159	ARL13B_KAN583-7_2.tif:0004-0065	0.26	105.5	2	176	107.651	10.385	0.368	27.432	1055	5.067	0.197	0.606	0.014135
1160	ARL13B_KAN583-7_2.tif:0005-0076	4.576	913.432	68	2871	153.378	12.274	0.486	4180.12	160764	3.986	0.251	0.852	2.15393
1161	ARL13B_KAN583-7_2.tif:0006-0081	0.442	168.294	71	259	10.126	13.265	0.47	74.39	2861	2.229	0.449	0.654	0.038332
1162	ARL13B_KAN583-7_2.tif:0007-0100	3.094	1222.08	130	4221	140.81	15.935	0.516	3781.36	145428	3.407	0.293	0.785	1.94846
1163	ARL13B_KAN583-7_2.tif:0008-0183	3.744	718.299	131	2194	79.614	29.643	0.535	2689.47	103435	3.994	0.25	0.906	1.38583
1164	ARL13B_KAN583-7_2.tif:0009-0204	1.014	228.692	99	468	161.033	32.802	0.467	231.908	8919	2.705	0.37	0.609	0.119498
1165	ARL13B_KAN583-7_2.tif:0010-0247	2.86	941.282	41	3135	184.765	39.858	0.59	2692.23	103541	2.974	0.336	0.843	1.38725
1166	ARL13B_KAN583-7_2.tif:0011-0280	3.406	374.748	59	950	111.604	44.836	0.398	1276.47	49092	3.201	0.312	0.609	0.65774
1167	ARL13B_KAN583-7_2.tif:0012-0303	2.73	377.629	34	1508	48.37	48.686	0.409	1030.99	39651	4.065	0.246	0.698	0.531248
1168	ARL13B_KAN583-7_2.tif:0013-0329	3.198	713.39	152	1883	78.191	52.971	0.5	2281.56	87747	3.876	0.258	0.73	1.17564
1169	ARL13B_KAN583-7_2.tif:0014-0329	4.29	818.442	82	2908	166.029	52.989	0.464	3511.33	135043	3.36	0.298	0.713	1.80932
1170	ARL13B_KAN583-7_2.tif:0015-0424	2.574	259.667	29	690	107.608	68.415	0.413	668.422	25707	3.93	0.254	0.658	0.344425
1171	ARL13B_KAN583-7_2.tif:0016-0440	2.886	459.712	153	1461	47.83	70.919	0.404	1326.81	51028	4.954	0.202	0.687	0.683678
1172	ARL13B_KAN583-7_2.tif:0017-0484	4.056	610.103	56	1734	203.753	78.088	0.324	2474.72	95176	5.544	0.18	0.611	1.27518
1173	ARL13B_KAN583-7_2.tif:0018-0519	2.574	291.626	87	578	97.805	83.494	0.228	750.691	28871	8.617	0.116	0.598	0.386817
1174	ARL13B_KAN583-7_2.tif:0019-0558	4.914	1020.37	151	3231	74.925	89.927	0.484	5014.38	192849	3.597	0.278	0.778	2.58381
1175	ARL13B_KAN583-7_2.tif:0020-0572	1.3	182.96	3	436	203.888	92.516	0.539	237.862	9148	2.366	0.423	0.741	0.122566
1176	ARL13B_KAN583-7_2.tif:0021-0604	3.562	863.942	115	4304	90.525	97.456	0.426	3077.55	118360	4.358	0.229	0.741	1.5858
1177	ARL13B_KAN583-7_2.tif:0022-0607	2.808	308.648	106	617	163.003	97.65	0.33	866.736	33334	5.28	0.189	0.619	0.446612
1178	ARL13B_KAN583-7_2.tif:0023-0637	3.874	726.611	0	2672	40.296	102.633	0.434	2815.06	108265	3.779	0.265	0.738	1.45055
1179	ARL13B_KAN583-7_2.tif:0024-0724	3.9	339.327	21	1001	125.88	116.943	0.359	1323.45	50899	4.134	0.242	0.665	0.68195
1180	ARL13B_KAN583-7_2.tif:0025-0765	3.77	1442.87	85	4398	165.784	123.238	0.499	5439.94	209216	3.508	0.285	0.782	2.8031
1181	ARL13B_KAN583-7_2.tif:0026-0776	3.094	795.345	65	3251	196.617	125.217	0.507	2460.94	94646	3.363	0.297	0.758	1.26808
1182	ARL13B_KAN583-7_2.tif:0027-0795	4.316	705.151	145	1902	60.525	128.004	0.387	3043.61	117055	5.03	0.199	0.699	1.56831
1183	ARL13B_KAN583-7_2.tif:0028-0839	1.17	240.178	121	391	102.7	135.219	0.559	281.025	10808	2.513	0.398	0.75	0.144807
1184	ARL13B_KAN583-7_2.tif:0029-0878	1.612	215.887	73	478	34.908	141.588	0.297	348.031	13385	6.011	0.166	0.62	0.179334
1185	ARL13B_KAN583-7_2.tif:0030-0933	2.652	574.265	135	1691	96.088	150.492	0.466	1523.04	58575	4.29	0.233	0.803	0.784794
1186	ARL13B_KAN583-7_3.tif:0001-0013	3.094	457.538	0	1957	103.081	1.854	0.442	1415.71	54447	4.191	0.239	0.698	0.729487
1187	ARL13B_KAN583-7_3.tif:0002-0021	4.186	765.671	132	2493	200.056	3.459	0.394	3205.29	123273	4.479	0.223	0.705	1.65162
1188	ARL13B_KAN583-7_3.tif:0003-0083	2.184	578.369	153	1190	7.552	13.244	0.532	1263.23	48583	3.358	0.298	0.747	0.65092
1189	ARL13B_KAN583-7_3.tif:0004-0131	3.796	818.384	89	2724	89.066	21	0.519	3106.77	119484	3.153	0.317	0.779	1.60086
1190	ARL13B_KAN583-7_3.tif:0005-0142	4.082	619.166	107	2507	80.658	22.806	0.414	2527.59	97209	4.85	0.206	0.751	1.30242
1191	ARL13B_KAN583-7_3.tif:0006-0172	4.342	754.132	19	2666	105.487	27.682	0.418	3274.64	125940	4.861	0.206	0.791	1.68736
1192	ARL13B_KAN583-7_3.tif:0007-0182	2.756	622.509	160	1531	39.172	29.252	0.58	1715.74	65986	3.234	0.309	0.825	0.884087
1193	ARL13B_KAN583-7_3.tif:0008-0210	3.952	737.342	93	2678	134.383	33.852	0.486	2914.15	112076	4.071	0.246	0.809	1.50161
1194	ARL13B_KAN583-7_3.tif:0009-0282	2.912	307.214	110	554	23.046	45.488	0.534	894.662	34408	2.75	0.364	0.775	0.461002
1195	ARL13B_KAN583-7_3.tif:0010-0321	3.38	772.977	136	2130	15.464	51.753	0.469	2612.82	100487	3.916	0.255	0.765	1.34634
1196	ARL13B_KAN583-7_3.tif:0011-0415	3.406	884.305	150	2878	85.819	66.939	0.5	3012.12	115844	3.608	0.277	0.824	1.55209
1197	ARL13B_KAN583-7_3.tif:0012-0436	3.328	752.242	105	2181	27.651	70.33	0.459	2503.61	96287	4.087	0.245	0.839	1.29006
1198	ARL13B_KAN583-7_3.tif:0013-0460	3.666	597.943	104	2060	134.25	74.552	0.418	2192.19	84310	1.893	0.528	0.614	1.12959
1199	ARL13B_KAN583-7_3.tif:0014-0485	0.39	167.533	114	233	206.255	78.222	0.588	65.342	2513	3.174	0.315	0.789	0.0336694
1200	ARL13B_KAN583-7_3.tif:0015-0493	0.962	175.973	82	318	58.706	79.206	0.34	169.296	6511	1.981	0.505	0.507	0.0872351
1201	ARL13B_KAN583-7_3.tif:0016-0543	3.328	1189.09	78	3753	153.451	87.765	0.57	3957.52	152203	2.832	0.353	0.78	2.03923
1202	ARL13B_KAN583-7_3.tif:0017-0550	3.406	898.069	36	3447	192.148	88.799	0.49	3059.01	117647	3.192	0.313	0.734	1.57625
1203	ARL13B_KAN583-7_3.tif:0018-0564	1.82	254.971	88	617	102.309	90.92	0.53	464.076	17848	3.988	0.251	0.892	0.239129
1204	ARL13B_KAN583-7_3.tif:0019-0586	4.108	1146.43	150	3752	173.836	94.668	0.46	4709.82	181136	3.903	0.256	0.765	2.42688
1205	ARL13B_KAN583-7_3.tif:0020-0600	2.886	807.243	61	2419	45.2	96.701	0.442	2329.84	89604	3.926	0.255	0.75	1.20052
1206	ARL13B_KAN583-7_3.tif:0021-0651	3.224	1003.69	27	4099	154.7	104.953	0.534	3236.1	124458	3.261	0.307	0.829	1.6675
1207	ARL13B_KAN583-7_3.tif:0022-0659	1.248	228	1	710	172.638	106.338	0.503	284.561	10944	2.69	0.372	0.667	0.146629
1208	ARL13B_KAN583-7_3.tif:0023-0886	0.468	227.333	167	367	20.174	142.912	0.429	106.398	4092	4.566	0.219	0.667	0.054825
1209	ARL13B_KAN583-7_3.tif:0024-0950	1.3	193.84	68	354	169.361	153.139	0.521	252.007	9692	3.481	0.287	0.833	0.129854
1210	ARL13B_KAN583-7_3.tif:0025-1026	3.38	958.669	131	3088	215.946	165.547	0.491	3240.5	124627	3.637	0.275	0.833	1.66977
1211	ARL13B_KAN583-7_4.tif:0001-0151	3.146	289.95	61	755	17.677	24.34	0.288	912.239	35084	6.608	0.151	0.733	0.470059
1212	ARL13B_KAN583-7_4.tif:0002-0180	3.692	826.972	84	2687	64.834	29.162	0.533	3053.36	117430	3.202	0.312	0.753	1.57334
1213	ARL13B_KAN583-7_4.tif:0003-0236	3.952	445.493	100	977	73.715	38.261	0.569	1760.7	67715	3.062	0.327	0.864	0.907253
1214	ARL13B_KAN583-7_4.tif:0004-0311	3.614	567.288	10	1626	35.386	50.016	0.413	2050.3	78853	3.601	0.278	0.704	1.05648
1215	ARL13B_KAN583-7_4.tif:0005-0326	3.198	532.512	124	1634	198.388	52.697	0.503	1703.08	65499	3.531	0.283	0.807	0.877562
1216	ARL13B_KAN583-7_4.tif:0006-0439	3.328	371.5	88	1308	149.563	70.804	0.427	1236.43	47552	4.166	0.24	0.723	0.637107
1217	ARL13B_KAN583-7_4.tif:0007-0477	4.94	343.479	4	889	105.828	77.271	0.386	1696.89	65261	1.927	0.519	0.601	0.874374
1218	ARL13B_KAN583-7_4.tif:0008-0513	2.73	616.238	94	1865	169.095	82.982	0.545	1682.43	64705	2.464	0.406	0.724	0.866924
1219	ARL13B_KAN583-7_4.tif:0009-0567	3.562	421.102	42	961	16.212	91.419	0.501	1500.06	57691	3.313	0.302	0.813	0.77295
1220	ARL13B_KAN583-7_4.tif:0010-0666	1.742	297.075	114	1044	47.077	107.408	0.458	517.535	19904	3.82	0.262	0.684	0.266676
1221	ARL13B_KAN583-7_4.tif:0011-0708	4.368	388.226	159	805	214.89	114.232	0.491	1695.87	65222	3.234	0.309	0.743	0.873851
1222	ARL13B_KAN583-7_4.tif:0012-0743	3.12	987.2	152	2949	88.782	119.797	0.583	3080.25	118464	2.675	0.374	0.845	1.58719
1223	ARL13B_KAN583-7_4.tif:0013-0753	1.794	227.058	24	488	58.462	121.207	0.307	407.367	15667	2.679	0.373	0.463	0.209908
1224	ARL13B_KAN583-7_4.tif:0014-0780	3.068	788.847	34	2448	12.651	125.727	0.519	2420.33	93084	3.587	0.279	0.811	1.24715
1225	ARL13B_KAN583-7_4.tif:0015-0804	3.328	314.711	59	612	141.564	129.551	0.441	1047.42	40283	3.857	0.259	0.696	0.539716
1226	ARL13B_KAN583-7_4.tif:0016-0837	2.6	505.24	56	1546	191.999	135.005	0.479	1313.7	50524	3.034	0.33	0.73	0.676926
1227	ARL13B_KAN583-7_4.tif:0017-0879	2.054	401.62	103	943	10.978	141.777	0.568	824.978	31728	3.241	0.309	0.794	0.425095
1228	ARL13B_KAN583-7_4.tif:0018-0961	3.432	556.879	112	1780	41.754	154.927	0.407	1911.32	73508	4.515	0.221	0.733	0.984868
1229	ARL13B_KAN583-7_4.tif:0019-0987	2.652	616.441	100	1533	166.465	158.913	0.344	1634.9	62877	4.582	0.218	0.687	0.842433
1230	ARL13B_KAN583-7_4.tif:0020-1007	3.64	695.729	144	2470	193.11	162.63	0.389	2532.61	97402	4.12	0.243	0.642	1.305
1231	ARL13B_KAN583-7_5.tif:0001-0023	2.964	750.14	152	1901	70.565	3.719	0.432	2223.55	85516	4.174	0.24	0.691	1.14575
1232	ARL13B_KAN583-7_5.tif:0002-0082	3.536	490.301	115	1449	51.531	13.477	0.573	1733.81	66681	3.256	0.307	0.869	0.893399
1233	ARL13B_KAN583-7_5.tif:0003-0112	2.808	340.694	42	778	107.672	18.103	0.327	956.728	36795	4.597	0.218	0.558	0.492983
1234	ARL13B_KAN583-7_5.tif:0004-0161	2.73	867.61	85	3078	134.612	25.979	0.552	2368.72	91099	3.063	0.326	0.814	1.22055
1235	ARL13B_KAN583-7_5.tif:0005-0176	2.678	551.631	41	1955	194.287	28.396	0.505	1477.36	56818	3.782	0.264	0.772	0.761253
1236	ARL13B_KAN583-7_5.tif:0006-0208	2.444	263.851	47	775	79.237	33.609	0.185	644.891	24802	10.739	0.093	0.514	0.3323
1237	ARL13B_KAN583-7_5.tif:0007-0220	3.068	837.254	82	2488	41.075	35.418	0.427	2568.85	98796	5.528	0.181	0.779	1.32368
1238	ARL13B_KAN583-7_5.tif:0008-0275	2.132	318.976	67	985	98.789	44.538	0.292	680.097	26156	5.077	0.197	0.603	0.350441
1239	ARL13B_KAN583-7_5.tif:0009-0282	3.536	910.059	58	3114	65.221	45.41	0.528	3218.16	123768	3.062	0.327	0.735	1.65826
1240	ARL13B_KAN583-7_5.tif:0010-0310	3.692	697.57	153	1819	147.544	50.254	0.56	2575.59	99055	3.335	0.3	0.823	1.32715
1241	ARL13B_KAN583-7_5.tif:0011-0345	2.6	655.33	145	1741	142.495	55.726	0.531	1703.96	65533	3.126	0.32	0.769	0.878018
1242	ARL13B_KAN583-7_5.tif:0012-0366	3.016	921.181	117	3082	67.988	59.059	0.56	2778.45	106857	3.69	0.271	0.82	1.43168
1243	ARL13B_KAN583-7_5.tif:0013-0454	0.988	241.553	123	551	81.342	73.309	0.424	238.668	9179	4.177	0.239	0.745	0.122981
1244	ARL13B_KAN583-7_5.tif:0014-0583	3.588	879.246	95	2617	53.225	93.751	0.37	3154.93	121336	4.862	0.206	0.734	1.62567
1245	ARL13B_KAN583-7_5.tif:0015-0629	4.056	585.462	91	1726	117.509	101.513	0.259	2374.78	91332	7.496	0.133	0.642	1.22368
1246	ARL13B_KAN583-7_5.tif:0016-0627	3.354	991.357	106	3408	168.347	101.288	0.542	3325.21	127885	3.768	0.265	0.804	1.71342
1247	ARL13B_KAN583-7_5.tif:0017-0728	0.364	167.571	110	219	53.224	117.436	0.587	61	2346	2.814	0.355	0.7	0.031432
1248	ARL13B_KAN583-7_5.tif:0018-0782	0.91	236.4	153	403	56.057	126.233	0.314	215.137	8274	6.567	0.152	0.648	0.110856
1249	ARL13B_KAN583-7_5.tif:0019-0809	2.99	767.261	92	2500	137.269	130.376	0.472	2294.25	88235	3.337	0.3	0.721	1.18218
1250	ARL13B_KAN583-7_5.tif:0020-0860	2.574	240.899	51	555	124.173	138.669	0.587	620.111	23849	2.813	0.356	0.825	0.319531
1251	ARL13B_KAN583-7_5.tif:0021-0866	1.04	201.4	79	358	210.028	139.602	0.524	209.469	8056	2.321	0.431	0.721	0.107935
1252	ARL13B_KAN583-7_5.tif:0022-0890	2.002	567.052	154	1293	50.644	143.461	0.425	1135.31	43663	4.759	0.21	0.759	0.585001
1253	ARL13B_KAN583-7_5.tif:0023-0891	3.38	694.192	28	1857	92.905	143.57	0.34	2346.51	90245	3.487	0.287	0.606	1.20911
1254	ARL13B_KAN583-7_5.tif:0024-0899	3.016	485.853	21	1534	173.545	145.001	0.52	1465.42	56359	4.094	0.244	0.866	0.755104
1255	ARL13B_KAN583-7_5.tif:0025-0932	1.43	482.455	151	1036	124.073	150.225	0.532	689.952	26535	3.562	0.281	0.748	0.355519
1256	ARL13B_KAN583-7_5.tif:0026-1029	3.094	1056.44	158	2791	102.645	166.062	0.521	3268.84	125717	3.938	0.254	0.844	1.68437
1257	ARL13B_KAN583-7_6.tif:0001-0045	1.378	218.811	151	361	14.642	7.379	0.324	301.54	11597	4.869	0.205	0.62	0.155378
1258	ARL13B_KAN583-7_6.tif:0002-0065	1.924	295.865	110	671	50.885	10.412	0.472	569.278	21894	3.15	0.317	0.755	0.293338
1259	ARL13B_KAN583-7_6.tif:0003-0121	2.886	368.586	116	923	83.623	19.649	0.412	1063.8	40913	3.913	0.256	0.677	0.548157
1260	ARL13B_KAN583-7_6.tif:0004-0151	3.094	1062.69	106	4897	156.84	24.489	0.563	3288.16	126460	3.58	0.279	0.881	1.69432
1261	ARL13B_KAN583-7_6.tif:0005-0150	2.756	680.047	117	1704	20.928	24.16	0.492	1874.32	72085	3.6	0.278	0.819	0.965802
1262	ARL13B_KAN583-7_6.tif:0006-0314	3.9	612.48	147	1735	92.849	50.566	0.497	2388.82	91872	3.078	0.325	0.765	1.23091
1263	ARL13B_KAN583-7_6.tif:0007-0319	3.692	322.866	108	727	31.61	51.522	0.402	1192.09	45847	4.887	0.205	0.759	0.614263
1264	ARL13B_KAN583-7_6.tif:0008-0417	3.718	724.322	112	2223	149.299	67.456	0.377	2693.19	103578	4.719	0.212	0.737	1.38775
1265	ARL13B_KAN583-7_6.tif:0009-0433	2.678	324.417	152	769	126.169	69.954	0.415	868.842	33415	4.41	0.227	0.715	0.447698
1266	ARL13B_KAN583-7_6.tif:0010-0703	2.158	360.41	88	901	63.028	113.465	0.268	777.811	29914	6.221	0.161	0.572	0.400791
1267	ARL13B_KAN583-7_6.tif:0011-0836	2.314	814.73	75	2952	200.295	134.815	0.462	1885.4	72511	3.126	0.32	0.751	0.97151
1268	ARL13B_KAN583-7_6.tif:0012-0883	3.042	1079.56	114	4018	128.233	142.579	0.531	3284.23	126309	3.024	0.331	0.767	1.6923
1269	ARL13B_KAN583-7_6.tif:0013-0923	2.886	732.676	64	1913	19.348	148.97	0.402	2114.63	81327	4.111	0.243	0.725	1.08963
1270	ARL13B_KAN583-7_6.tif:0014-0933	2.808	1063.76	152	3227	86.664	150.519	0.597	2987.22	114886	3.13	0.319	0.861	1.53925
1271	ARL13B_KAN583-7_6.tif:0015-0945	3.12	891.917	0	3190	197.511	152.181	0.48	2782.95	107030	2.71	0.369	0.704	1.434
1272	ARL13B_KAN583-7_6.tif:0016-1010	2.262	608.724	43	1508	106.897	162.828	0.4	1377.02	52959	3.627	0.276	0.652	0.70955
										73476.7				0.984448
1273	ARL13B_KAN583-8_1.tif:0001-0014	1.924	402.068	46	1046	15.818	2.329	0.587	773.625	29753	1.909	0.524	0.729	0.398634
1274	ARL13B_KAN583-8_1.tif:0002-0080	0.442	175.471	82	261	57.391	12.876	0.46	77.563	2983	3.1	0.323	0.596	0.0399665
1275	ARL13B_KAN583-8_1.tif:0003-0092	2.028	358.59	79	1085	184.46	14.938	0.354	727.264	27970	4.831	0.207	0.619	0.374745
1276	ARL13B_KAN583-8_1.tif:0004-0201	1.508	253.466	0	840	101.874	32.461	0.412	382.249	14701	3.71	0.27	0.601	0.196966
1277	ARL13B_KAN583-8_1.tif:0005-0222	1.222	210.66	31	571	151.958	35.892	0.543	257.442	9901	2.116	0.472	0.707	0.132655
1278	ARL13B_KAN583-8_1.tif:0006-0231	1.04	242.175	150	375	221.888	37.313	0.277	251.877	9687	6.853	0.146	0.62	0.129787
1279	ARL13B_KAN583-8_1.tif:0007-0351	2.184	271.524	16	625	66.245	56.8	0.301	593.044	22808	6.091	0.164	0.598	0.305584
1280	ARL13B_KAN583-8_1.tif:0008-0445	2.158	379.205	7	1441	158.951	71.773	0.365	818.373	31474	4.234	0.236	0.629	0.421692
1281	ARL13B_KAN583-8_1.tif:0009-0462	2.054	530.722	44	1139	28.734	74.686	0.457	1090.17	41927	4.244	0.236	0.767	0.561742
1282	ARL13B_KAN583-8_1.tif:0010-0580	3.25	310.96	94	639	101.725	93.568	0.596	1010.68	38870	2.467	0.405	0.801	0.520784
1283	ARL13B_KAN583-8_1.tif:0011-0622	1.768	289.603	82	638	38.434	100.196	0.259	512.049	19693	7.364	0.136	0.67	0.263849
1284	ARL13B_KAN583-8_1.tif:0012-0654	1.742	454.239	114	1007	5.515	105.529	0.516	791.332	30434	3.232	0.309	0.74	0.407758
1285	ARL13B_KAN583-8_1.tif:0013-0701	2.652	627.824	87	1892	88.847	113.136	0.542	1665.09	64038	3.515	0.285	0.816	0.857988
1286	ARL13B_KAN583-8_1.tif:0014-0820	1.586	333.246	154	659	34.041	132.203	0.492	528.56	20328	3.736	0.268	0.731	0.272357
1287	ARL13B_KAN583-8_1.tif:0015-0822	2.262	498.655	92	1425	109.393	132.428	0.474	1128.03	43383	3.425	0.292	0.702	0.58125
1288	ARL13B_KAN583-8_1.tif:0016-0886	1.274	245.469	115	439	191.402	142.691	0.425	312.747	12028	2.929	0.341	0.62	0.161152
1289	ARL13B_KAN583-8_1.tif:0017-0962	1.092	176.333	135	242	67.099	155.165	0.572	192.568	7406	2.412	0.415	0.75	0.0992264
1290	ARL13B_KAN583-8_1.tif:0018-0966	2.704	676.51	68	1670	142.906	155.802	0.401	1829.39	70357	4.767	0.21	0.743	0.94265
1291	ARL13B_KAN583-8_1.tif:0019-1035	1.092	298.143	126	492	11.771	166.974	0.527	325.592	12522	4.667	0.214	1	0.167771
1292	ARL13B_KAN583-8_2.tif:0001-0007	1.69	480.985	98	1545	164.744	0.884	0.442	812.913	31264	2.697	0.371	0.76	0.418878
1293	ARL13B_KAN583-8_2.tif:0002-0022	1.274	346	120	792	89.643	3.671	0.566	440.831	16954	3.357	0.298	0.778	0.227151
1294	ARL13B_KAN583-8_2.tif:0003-0037	2.73	380.286	62	986	66.179	6.159	0.359	1038.24	39930	4.958	0.202	0.755	0.534986
1295	ARL13B_KAN583-8_2.tif:0004-0030	1.846	579.958	98	1326	180.161	4.861	0.566	1070.67	41177	3.428	0.292	0.78	0.551694
1296	ARL13B_KAN583-8_2.tif:0005-0060	0.494	158.895	81	195	7.897	9.637	0.41	78.499	3019	3.167	0.316	0.655	0.0404489
1297	ARL13B_KAN583-8_2.tif:0006-0099	1.508	281.345	63	889	44.03	16.117	0.536	424.294	16318	3.113	0.321	0.758	0.21863
1298	ARL13B_KAN583-8_2.tif:0007-0103	1.768	274.515	86	600	143.422	16.516	0.429	485.371	18667	2.578	0.388	0.627	0.250102
1299	ARL13B_KAN583-8_2.tif:0008-0127	1.716	256.03	19	661	210.998	20.533	0.524	439.374	16898	3.541	0.282	0.776	0.226401
1300	ARL13B_KAN583-8_2.tif:0009-0151	0.52	234.45	155	332	149.068	24.333	0.572	121.921	4689	3.464	0.289	0.714	0.0628237
1301	ARL13B_KAN583-8_2.tif:0010-0170	2.808	303.185	84	847	104.904	27.368	0.309	851.395	32744	4.584	0.218	0.633	0.438707
1302	ARL13B_KAN583-8_2.tif:0011-0175	1.924	266.203	62	547	16.539	28.415	0.359	512.205	19699	4.31	0.232	0.661	0.263929
1303	ARL13B_KAN583-8_2.tif:0012-0235	2.236	438.837	21	1181	217.442	38.108	0.51	981.299	37740	2.75	0.364	0.732	0.505644
1304	ARL13B_KAN583-8_2.tif:0013-0274	2.08	362.75	150	849	104	44.211	0.592	754.565	29020	3.048	0.328	0.825	0.388813
1305	ARL13B_KAN583-8_2.tif:0014-0303	2.574	688.232	105	2485	201.868	48.71	0.415	1771.62	68135	4.14	0.242	0.685	0.91288
1306	ARL13B_KAN583-8_2.tif:0015-0336	2.678	367.097	70	950	115.561	54.187	0.393	983.145	37811	4.471	0.224	0.698	0.506596
1307	ARL13B_KAN583-8_2.tif:0016-0370	1.95	351.707	150	786	193.25	59.767	0.494	685.869	26378	3.795	0.263	0.75	0.353415
1308	ARL13B_KAN583-8_2.tif:0017-0381	1.534	286.966	107	641	10.584	61.413	0.426	440.233	16931	3.842	0.26	0.67	0.226843
1309	ARL13B_KAN583-8_2.tif:0018-0398	2.886	705.207	156	2115	150.406	64.126	0.578	2035.35	78278	2.564	0.39	0.747	1.04878
1310	ARL13B_KAN583-8_2.tif:0019-0436	2.626	380.089	49	1093	50.828	70.427	0.469	998.174	38389	4.121	0.243	0.757	0.51434
1311	ARL13B_KAN583-8_2.tif:0020-0434	1.482	387.175	150	896	107.318	69.922	0.495	573.829	22069	3.832	0.261	0.765	0.295683
1312	ARL13B_KAN583-8_2.tif:0021-0555	2.6	405.84	97	1147	140.478	89.308	0.447	1055.25	40584	4.077	0.245	0.769	0.543749
1313	ARL13B_KAN583-8_2.tif:0022-0595	2.028	732.115	94	2403	221.285	95.938	0.487	1484.82	57105	2.874	0.348	0.69	0.765099
1314	ARL13B_KAN583-8_2.tif:0023-0609	1.014	163.974	0	333	166.458	98.435	0.191	166.28	6395	2.559	0.391	0.332	0.0856809
1315	ARL13B_KAN583-8_2.tif:0024-0650	0.78	134.667	27	211	159.455	104.985	0.588	105.046	4040	1.701	0.588	0.75	0.0541283
1316	ARL13B_KAN583-8_2.tif:0025-0747	1.846	334	84	705	62.055	120.566	0.499	616.601	23714	3.687	0.271	0.755	0.317723
1317	ARL13B_KAN583-8_2.tif:0026-0762	1.768	459.265	90	1063	50.232	122.707	0.363	812.029	31230	3.597	0.278	0.551	0.418423
1318	ARL13B_KAN583-8_2.tif:0027-0780	1.95	399.773	141	1031	168.8	125.989	0.456	779.605	29983	2.73	0.366	0.625	0.401715
1319	ARL13B_KAN583-8_2.tif:0028-0856	2.158	287.614	60	805	73.751	137.963	0.257	620.709	23872	4.825	0.207	0.529	0.31984
1320	ARL13B_KAN583-8_2.tif:0029-0962	1.664	468.062	28	1130	182.726	154.994	0.366	778.903	29956	3.253	0.307	0.598	0.401354
1321	ARL13B_KAN583-8_2.tif:0030-0969	2.548	310.694	123	577	54.939	156.23	0.518	791.696	30448	3.032	0.33	0.69	0.407945
1322	ARL13B_KAN583-8_2.tif:0031-1026	1.274	286.306	65	623	25.058	165.464	0.521	364.776	14029	3.285	0.304	0.726	0.187962
1323	ARL13B_KAN583-8_2.tif:0032-1031	2.028	373.936	139	976	220.935	166.243	0.367	758.388	29167	4.76	0.21	0.658	0.390782
1324	ARL13B_KAN583-8_3.tif:0001-0030	3.25	478.696	41	1269	26.513	4.823	0.348	1555.86	59837	5.849	0.171	0.751	0.801702
1325	ARL13B_KAN583-8_3.tif:0002-0022	2.08	248.537	38	521	152.536	3.681	0.293	516.989	19883	5.699	0.175	0.567	0.266394
1326	ARL13B_KAN583-8_3.tif:0003-0115	0.572	160.955	78	303	217.915	18.639	0.364	92.072	3541	4.019	0.249	0.543	0.0474427
1327	ARL13B_KAN583-8_3.tif:0004-0125	1.586	271.41	91	484	62.138	20.049	0.462	430.482	16556	4.405	0.227	0.824	0.221819
1328	ARL13B_KAN583-8_3.tif:0005-0130	2.496	348.594	0	1120	86.596	21.196	0.428	870.142	33465	3.134	0.319	0.671	0.448368
1329	ARL13B_KAN583-8_3.tif:0006-0146	0.442	157.176	70	218	182.483	23.727	0.539	69.476	2672	2.143	0.467	0.694	0.0357997
1330	ARL13B_KAN583-8_3.tif:0007-0157	3.822	568.02	59	1568	148.017	25.286	0.493	2171.11	83499	3.932	0.254	0.85	1.11873
1331	ARL13B_KAN583-8_3.tif:0008-0179	1.586	197.492	25	339	3.588	28.881	0.3	313.241	12047	4.536	0.22	0.517	0.161407
1332	ARL13B_KAN583-8_3.tif:0009-0179	2.47	414.347	94	1185	190.322	28.926	0.418	1023.5	39363	4.469	0.224	0.706	0.52739
1333	ARL13B_KAN583-8_3.tif:0010-0271	2.392	552.576	45	1928	180.824	43.688	0.451	1321.84	50837	3.836	0.261	0.722	0.681119
1334	ARL13B_KAN583-8_3.tif:0011-0299	2.314	385.371	77	1080	100.913	48.222	0.547	891.802	34298	2.865	0.349	0.84	0.459528
1335	ARL13B_KAN583-8_3.tif:0012-0324	2.106	210.284	73	478	166.479	52.493	0.305	442.885	17033	3.967	0.252	0.581	0.22821
1336	ARL13B_KAN583-8_3.tif:0013-0330	1.794	328.725	64	802	24.076	53.309	0.283	589.768	22682	7.497	0.133	0.633	0.303896
1337	ARL13B_KAN583-8_3.tif:0014-0368	3.094	446.017	55	1492	117.972	59.61	0.393	1380.06	53076	3.86	0.259	0.665	0.711118
1338	ARL13B_KAN583-8_3.tif:0015-0379	0.78	202.967	135	290	4.322	61.114	0.259	158.324	6089	8.363	0.12	0.625	0.0815811
1339	ARL13B_KAN583-8_3.tif:0016-0391	1.846	265.113	70	533	26.539	63.027	0.491	489.427	18823	3.738	0.267	0.785	0.252192
1340	ARL13B_KAN583-8_3.tif:0017-0477	3.9	421.573	93	1153	58.885	76.902	0.408	1644.23	63236	4.208	0.238	0.667	0.847242
1341	ARL13B_KAN583-8_3.tif:0018-0635	2.21	224.224	18	451	181.472	102.271	0.447	495.564	19059	2.213	0.452	0.627	0.255354
1342	ARL13B_KAN583-8_3.tif:0019-0669	2.756	400.217	120	1496	56.803	108.12	0.433	1103.06	42423	4.081	0.245	0.731	0.568388
1343	ARL13B_KAN583-8_3.tif:0020-0681	1.586	661.443	72	1763	211.649	109.659	0.478	1049.11	40348	3.293	0.304	0.777	0.540587
1344	ARL13B_KAN583-8_3.tif:0021-0708	2.132	508.402	152	1548	147.312	114.289	0.488	1083.98	41689	3.973	0.252	0.77	0.558554
1345	ARL13B_KAN583-8_3.tif:0022-0739	1.196	222.457	107	428	220.632	119.083	0.369	266.074	10233	3.447	0.29	0.575	0.137103
1346	ARL13B_KAN583-8_3.tif:0023-0770	3.536	268.316	60	659	218.694	124.352	0.339	948.823	36491	5.776	0.173	0.646	0.48891
1347	ARL13B_KAN583-8_3.tif:0024-0865	2.808	706.62	53	2463	97.256	139.511	0.455	1984.31	76315	4.765	0.21	0.806	1.02248
1348	ARL13B_KAN583-8_3.tif:0025-0870	1.456	198.893	89	386	165.048	140.296	0.595	289.605	11138	1.96	0.51	0.723	0.149228
1349	ARL13B_KAN583-8_3.tif:0026-0905	1.014	222.615	150	373	144.747	146.045	0.39	225.746	8682	4.095	0.244	0.629	0.116322
1350	ARL13B_KAN583-8_3.tif:0027-0980	2.366	397.341	124	943	15.812	158.184	0.422	940.165	36158	3.339	0.299	0.684	0.484449
1351	ARL13B_KAN583-8_3.tif:0028-1008	2.548	258.735	0	694	189.902	162.522	0.446	659.296	25356	1.953	0.512	0.622	0.339722
1352	ARL13B_KAN583-8_4.tif:0001-0019	3.64	369.079	138	736	146.136	2.957	0.569	1343.53	51671	3.08	0.325	0.805	0.692293
1353	ARL13B_KAN583-8_4.tif:0002-0046	3.354	322.302	145	727	116.262	7.459	0.532	1081.07	41577	3.816	0.262	0.86	0.557053
1354	ARL13B_KAN583-8_4.tif:0003-0181	2.548	533.418	136	1421	184.199	29.099	0.442	1359.23	52275	4.316	0.232	0.757	0.700386
1355	ARL13B_KAN583-8_4.tif:0004-0281	2.626	494.297	105	1229	134.801	45.459	0.295	1298.1	49924	4.325	0.231	0.572	0.668887
1356	ARL13B_KAN583-8_4.tif:0005-0286	2.262	322.425	4	855	107.036	46.233	0.458	729.37	28051	2.768	0.361	0.659	0.37583
1357	ARL13B_KAN583-8_4.tif:0006-0320	1.872	384.403	19	1184	161.864	51.302	0.429	719.645	27677	3.385	0.295	0.664	0.370819
1358	ARL13B_KAN583-8_4.tif:0007-0398	1.924	241.122	47	540	128.797	64.4	0.322	463.946	17843	3.918	0.255	0.552	0.239062
1359	ARL13B_KAN583-8_4.tif:0008-0402	4.498	631.977	123	1748	60.232	64.558	0.423	2842.8	109332	3.327	0.301	0.692	1.46484
1360	ARL13B_KAN583-8_4.tif:0009-0427	4.056	470.654	31	1646	149.485	68.917	0.446	1909.09	73422	4.235	0.236	0.701	0.983716
1361	ARL13B_KAN583-8_4.tif:0010-0457	3.302	390.331	45	1327	200.045	73.834	0.498	1288.95	49572	3.701	0.27	0.777	0.664171
1362	ARL13B_KAN583-8_4.tif:0011-0486	3.25	294.584	72	642	136.346	78.351	0.517	957.456	36823	3.157	0.317	0.729	0.493358
1363	ARL13B_KAN583-8_4.tif:0012-0509	2.288	433.591	54	1414	59.97	82.23	0.511	992.116	38156	3.275	0.305	0.704	0.511218
1364	ARL13B_KAN583-8_4.tif:0013-0523	2.314	421.517	116	885	104.002	84.494	0.57	975.449	37515	3.195	0.313	0.798	0.50263
1365	ARL13B_KAN583-8_4.tif:0014-0545	4.186	517.472	20	1571	45.596	87.925	0.457	2166.27	83313	2.878	0.348	0.737	1.11624
1366	ARL13B_KAN583-8_4.tif:0015-0558	2.834	265.11	104	511	189.443	90.073	0.555	751.367	28897	2.813	0.356	0.732	0.387165
1367	ARL13B_KAN583-8_4.tif:0016-0581	3.354	299.109	119	643	159.479	93.773	0.509	1003.27	38585	3.909	0.256	0.791	0.516966
1368	ARL13B_KAN583-8_4.tif:0017-0616	4.03	303.052	51	610	109.253	99.024	0.422	1221.37	46973	2.422	0.413	0.615	0.629349
1369	ARL13B_KAN583-8_4.tif:0018-0685	2.678	463.631	140	1614	75.882	110.177	0.445	1241.68	47754	3.322	0.301	0.694	0.639813
1370	ARL13B_KAN583-8_4.tif:0019-0752	1.17	286.978	152	559	165.502	121.215	0.465	335.784	12914	3.48	0.287	0.698	0.173023
1371	ARL13B_KAN583-8_4.tif:0020-0794	3.094	309.689	125	692	133.901	128.143	0.415	958.236	36853	4.916	0.203	0.744	0.49376
1372	ARL13B_KAN583-8_4.tif:0021-0831	2.964	313.5	153	565	211.861	134.115	0.524	929.27	35739	3.247	0.308	0.792	0.478835
1373	ARL13B_KAN583-8_4.tif:0022-0841	2.028	282.577	30	744	35.25	135.591	0.382	573.101	22041	4.481	0.223	0.661	0.295308
1374	ARL13B_KAN583-8_4.tif:0023-0874	1.768	787.838	87	2189	32.644	141.011	0.573	1392.98	53573	2.369	0.422	0.791	0.717777
1375	ARL13B_KAN583-8_4.tif:0024-0877	3.354	351.225	65	841	194.607	141.543	0.512	1178.08	45308	2.89	0.346	0.789	0.607041
1376	ARL13B_KAN583-8_4.tif:0025-0944	2.782	231.206	90	443	161.287	152.48	0.28	643.253	24739	3.3	0.303	0.477	0.331456
1377	ARL13B_KAN583-8_4.tif:0026-0976	2.496	402.156	126	991	75.028	157.308	0.368	1003.84	38607	4.838	0.207	0.701	0.517261
1378	ARL13B_KAN583-8_4.tif:0027-1007	1.612	253.677	91	558	51.317	162.465	0.498	408.953	15728	3.682	0.272	0.805	0.210725
1379	ARL13B_KAN583-8_5.tif:0001-0024	0.364	178.786	155	213	197.543	3.801	0.564	65.082	2503	3.823	0.262	0.933	0.0335355
1380	ARL13B_KAN583-8_5.tif:0002-0065	0.598	156.174	91	224	211.521	10.555	0.496	93.398	3592	2.494	0.401	0.676	0.048126
1381	ARL13B_KAN583-8_5.tif:0003-0088	1.612	187.548	87	275	120.454	14.25	0.542	302.346	11628	3.622	0.276	0.873	0.155793
1382	ARL13B_KAN583-8_5.tif:0004-0153	1.378	209.057	150	332	204.616	24.764	0.595	288.097	11080	2.924	0.342	0.785	0.148451
1383	ARL13B_KAN583-8_5.tif:0005-0231	3.562	321.394	139	617	34.752	37.226	0.466	1144.88	44031	3.89	0.257	0.774	0.589932
1384	ARL13B_KAN583-8_5.tif:0006-0239	2.964	258.096	133	534	193.517	38.55	0.456	765.044	29423	4.088	0.245	0.784	0.394212
1385	ARL13B_KAN583-8_5.tif:0007-0268	2.704	290.981	110	782	44.435	43.21	0.459	786.859	30262	3.432	0.291	0.705	0.405453
1386	ARL13B_KAN583-8_5.tif:0008-0265	0.91	188.8	103	341	175.774	42.849	0.419	171.818	6608	2.48	0.403	0.654	0.0885347
1387	ARL13B_KAN583-8_5.tif:0009-0279	2.548	239.612	144	476	82.108	45.321	0.433	610.569	23482	3.602	0.278	0.662	0.314614
1388	ARL13B_KAN583-8_5.tif:0010-0307	2.652	537.127	105	1289	11.809	49.534	0.316	1424.55	54787	5.173	0.193	0.671	0.734042
1389	ARL13B_KAN583-8_5.tif:0011-0316	2.99	486.078	117	1200	63.192	50.919	0.514	1453.46	55899	3.594	0.278	0.769	0.748941
1390	ARL13B_KAN583-8_5.tif:0012-0388	1.482	212.825	102	330	137.893	62.646	0.559	315.425	12131	3.266	0.306	0.745	0.162532
1391	ARL13B_KAN583-8_5.tif:0013-0398	2.704	271.462	107	520	97.84	64.291	0.555	734.076	28232	3.042	0.329	0.785	0.378255
1392	ARL13B_KAN583-8_5.tif:0014-0444	2.886	246.234	87	484	181.262	71.588	0.341	710.675	27332	4.849	0.206	0.663	0.366197
1393	ARL13B_KAN583-8_5.tif:0015-0451	1.82	186.029	87	293	121.55	72.673	0.253	338.592	13022	6.571	0.152	0.733	0.17447
1394	ARL13B_KAN583-8_5.tif:0016-0476	2.938	362.726	90	868	65.518	76.9	0.41	1065.75	40988	3.188	0.314	0.673	0.549161
1395	ARL13B_KAN583-8_5.tif:0017-0529	2.938	464.743	52	1319	50.314	85.068	0.356	1365.5	52516	3.549	0.282	0.562	0.703615
1396	ARL13B_KAN583-8_5.tif:0018-0602	2.21	380.071	100	837	12.95	97.235	0.428	840.007	32306	4.299	0.233	0.714	0.432839
1397	ARL13B_KAN583-8_5.tif:0019-0696	3.796	997.808	100	2720	194.345	112.116	0.403	3787.91	145680	4.601	0.217	0.751	1.95184
1398	ARL13B_KAN583-8_5.tif:0020-0710	3.458	577.421	76	1338	39.297	114.562	0.545	1996.84	76797	3.471	0.288	0.836	1.02893
1399	ARL13B_KAN583-8_5.tif:0021-0737	1.898	286.356	121	430	1.585	118.811	0.334	543.537	20904	5.728	0.175	0.661	0.280074
1400	ARL13B_KAN583-8_5.tif:0022-0829	2.626	439.921	88	1092	51.582	133.664	0.516	1155.3	44432	3.986	0.251	0.821	0.595305
1401	ARL13B_KAN583-8_5.tif:0023-0831	3.12	432.95	32	1379	196.361	134.015	0.337	1350.88	51954	6.053	0.165	0.669	0.696085
1402	ARL13B_KAN583-8_5.tif:0024-0923	2.34	482.211	33	1390	170.044	148.984	0.49	1128.44	43399	3.027	0.33	0.723	0.581464
1403	ARL13B_KAN583-8_5.tif:0025-0967	3.25	474.28	117	1029	104.327	156.178	0.429	1541.5	59285	3.871	0.258	0.735	0.794307
1404	ARL13B_KAN583-8_5.tif:0026-0989	2.964	572.096	93	1535	191.581	159.988	0.501	1695.8	65219	2.009	0.498	0.745	0.873811
1405	ARL13B_KAN583-8_5.tif:0027-0989	3.276	422.286	121	986	131.21	159.51	0.497	1383.49	53208	3.867	0.259	0.768	0.712886
1406	ARL13B_KAN583-8_5.tif:0028-0989	1.95	351.213	57	1106	152.182	159.796	0.466	684.907	26341	3.945	0.253	0.781	0.352919
1407	ARL13B_KAN583-8_6.tif:0001-0096	3.822	467.327	64	1765	157.487	15.626	0.465	1786.23	68697	3.61	0.277	0.782	0.920409
1408	ARL13B_KAN583-8_6.tif:0002-0119	2.938	283.487	90	511	186.464	18.965	0.348	832.934	32034	4.644	0.215	0.598	0.429195
1409	ARL13B_KAN583-8_6.tif:0003-0147	3.068	265.212	29	557	205.911	23.836	0.317	813.719	31295	3.922	0.255	0.596	0.419294
1410	ARL13B_KAN583-8_6.tif:0004-0142	2.418	304.989	123	614	127.947	22.734	0.501	737.508	28364	2.862	0.349	0.718	0.380024
1411	ARL13B_KAN583-8_6.tif:0005-0250	2.73	325.514	48	1153	32.004	40.448	0.433	888.708	34179	4.701	0.213	0.83	0.457934
1412	ARL13B_KAN583-8_6.tif:0006-0272	2.444	529.021	120	1541	139.191	43.906	0.467	1293.01	49728	4.157	0.241	0.743	0.666261
1413	ARL13B_KAN583-8_6.tif:0007-0312	3.172	395.287	117	1241	181.672	50.599	0.272	1253.93	48225	4.604	0.217	0.51	0.646124
1414	ARL13B_KAN583-8_6.tif:0008-0332	3.172	414.984	78	1075	163.054	53.405	0.415	1316.41	50628	2.938	0.34	0.67	0.678319
1415	ARL13B_KAN583-8_6.tif:0009-0408	2.678	428.922	87	1139	165.849	65.835	0.443	1148.72	44179	4.588	0.218	0.811	0.591915
1416	ARL13B_KAN583-8_6.tif:0010-0439	1.768	213.853	91	367	19.279	70.86	0.32	378.115	14542	5.642	0.177	0.567	0.194835
1417	ARL13B_KAN583-8_6.tif:0011-0449	3.302	232.961	48	687	184.905	72.267	0.376	769.282	29586	3.751	0.267	0.724	0.396396
1418	ARL13B_KAN583-8_6.tif:0012-0558	3.614	448.079	56	1183	218.598	89.899	0.391	1619.46	62283	5.16	0.194	0.815	0.834474
1419	ARL13B_KAN583-8_6.tif:0013-0626	3.042	422.598	17	1103	120.933	101.087	0.411	1285.62	49444	4.285	0.233	0.741	0.662456
1420	ARL13B_KAN583-8_6.tif:0014-0661	0.676	171.077	104	244	64.624	106.512	0.524	115.655	4448	1.324	0.756	0.634	0.0595948
1421	ARL13B_KAN583-8_6.tif:0015-0740	3.38	595.969	105	1783	151.435	119.361	0.471	2014.5	77476	4.091	0.244	0.793	1.03803
1422	ARL13B_KAN583-8_6.tif:0016-1018	2.6	592.4	96	2079	220.311	164.312	0.499	1540.33	59240	3.468	0.288	0.722	0.793704
										34719.8				0.46518
1	ARL13B_KAN583-10_1.tif:0001-0103	2.132	449.61	113	1373	195.02	16.904	0.404	958.626	36868	2.911	0.343	0.603	0.493961
2	ARL13B_KAN583-10_1.tif:0002-0106	2.73	384.533	105	1108	58.519	17.367	0.534	1049.84	40376	3.085	0.324	0.758	0.540962
3	ARL13B_KAN583-10_1.tif:0003-0140	2.47	426.916	88	1089	102.128	22.69	0.451	1054.55	40557	3.379	0.296	0.681	0.543387
4	ARL13B_KAN583-10_1.tif:0004-0182	3.25	525.32	134	1737	150.724	29.228	0.422	1707.39	65665	3.593	0.278	0.656	0.879786
5	ARL13B_KAN583-10_1.tif:0005-0197	2.626	1119.23	43	3579	203.12	32.054	0.454	2939.27	113042	2.649	0.378	0.748	1.51455
6	ARL13B_KAN583-10_1.tif:0006-0245	3.796	593.699	82	1789	215.987	39.856	0.374	2253.82	86680	4.361	0.229	0.684	1.16135
7	ARL13B_KAN583-10_1.tif:0007-0247	2.756	525.142	142	1814	183.688	40.014	0.503	1447.38	55665	2.88	0.347	0.757	0.745805
8	ARL13B_KAN583-10_1.tif:0008-0261	2.184	379	95	1068	35.462	42.203	0.259	827.786	31836	7.011	0.143	0.587	0.426542
9	ARL13B_KAN583-10_1.tif:0009-0311	2.392	271.739	48	735	116.815	50.221	0.484	650.039	25000	3.877	0.258	0.736	0.334953
10	ARL13B_KAN583-10_1.tif:0010-0327	3.51	606.807	0	2003	79.011	52.55	0.554	2130.02	81919	2.493	0.401	0.763	1.09756
11	ARL13B_KAN583-10_1.tif:0011-0415	2.158	418.422	150	978	23.674	67.04	0.414	903.008	34729	4.973	0.201	0.706	0.465303
12	ARL13B_KAN583-10_1.tif:0012-0443	2.756	719.038	94	2412	155.533	71.718	0.446	1981.79	76218	3.778	0.265	0.754	1.02118
13	ARL13B_KAN583-10_1.tif:0013-0465	2.73	899.029	128	2679	24.463	75	0.527	2454.5	94398	3.553	0.281	0.837	1.26475
14	ARL13B_KAN583-10_1.tif:0014-0503	3.692	937.345	0	4114	154.141	81.009	0.352	3460.89	133103	3.341	0.299	0.62	1.78333
15	ARL13B_KAN583-10_1.tif:0015-0512	2.678	611.621	99	1711	195.671	82.608	0.5	1638.02	62997	3.819	0.262	0.783	0.84404
16	ARL13B_KAN583-10_1.tif:0016-0594	3.744	486.722	33	2304	158.227	95.794	0.535	1822.4	70088	1.781	0.561	0.692	0.939046
17	ARL13B_KAN583-10_1.tif:0017-0609	1.69	384.908	127	800	101.552	98.207	0.483	650.533	25019	4.336	0.231	0.739	0.335207
18	ARL13B_KAN583-10_1.tif:0018-0634	2.548	405.051	45	1060	33.838	102.461	0.327	1032.13	39695	5.968	0.168	0.713	0.531838
19	ARL13B_KAN583-10_1.tif:0019-0666	1.82	321.371	157	581	23.156	107.745	0.286	584.931	22496	3.923	0.255	0.53	0.301404
20	ARL13B_KAN583-10_1.tif:0020-0670	1.014	218.282	87	450	9.669	108.164	0.519	221.351	8513	3.137	0.319	0.78	0.114058
21	ARL13B_KAN583-10_1.tif:0021-0693	3.432	569.515	0	2504	74.92	112.025	0.475	1954.69	75176	2.792	0.358	0.71	1.00722
22	ARL13B_KAN583-10_1.tif:0022-0701	4.186	675.466	81	2789	168.6	113.029	0.412	2827.67	108750	5.42	0.185	0.799	1.45704
23	ARL13B_KAN583-10_1.tif:0023-0711	2.262	402.828	110	1302	119.424	114.642	0.516	911.251	35046	3.409	0.293	0.728	0.46955
24	ARL13B_KAN583-10_1.tif:0024-0764	3.328	834.93	140	2577	171.661	123.214	0.518	2778.81	106871	3.846	0.26	0.88	1.43187
25	ARL13B_KAN583-10_1.tif:0025-0793	3.198	623.171	144	1725	209.892	127.931	0.578	1993.02	76650	2.729	0.366	0.837	1.02696
26	ARL13B_KAN583-10_1.tif:0026-0818	2.938	373.15	152	774	183.104	131.983	0.575	1096.38	42166	3.282	0.305	0.873	0.564944
27	ARL13B_KAN583-10_1.tif:0027-0821	1.924	432.365	150	961	20.566	132.506	0.482	831.92	31995	3.296	0.303	0.725	0.428672
28	ARL13B_KAN583-10_1.tif:0028-0859	2.626	781.842	150	2754	61.404	138.448	0.479	2053.24	78966	4.092	0.244	0.798	1.05799
29	ARL13B_KAN583-10_1.tif:0029-0989	0.806	365.226	64	783	27.29	159.749	0.555	294.39	11322	2.327	0.43	0.827	0.151693
30	ARL13B_KAN583-10_2.tif:0001-0008	1.066	288.732	156	554	14.043	1.339	0.541	307.807	11838	4.029	0.248	0.732	0.158607
31	ARL13B_KAN583-10_2.tif:0002-0034	2.99	513.843	126	1744	44.687	5.314	0.51	1536.48	59092	3.079	0.325	0.73	0.791721
32	ARL13B_KAN583-10_2.tif:0003-0056	5.174	754.437	93	2714	107.864	8.974	0.413	3903.69	150133	3.166	0.316	0.655	2.0115
33	ARL13B_KAN583-10_2.tif:0004-0076	3.146	484.95	98	1209	157.717	12.13	0.383	1525.75	58679	4.245	0.236	0.624	0.786187
34	ARL13B_KAN583-10_2.tif:0005-0084	5.07	1043.54	50	3600	121.609	13.354	0.43	5291.06	203490	3.748	0.267	0.691	2.72638
35	ARL13B_KAN583-10_2.tif:0006-0140	3.25	474.656	150	1997	103.581	22.456	0.508	1542.72	59332	3.148	0.318	0.742	0.794936
36	ARL13B_KAN583-10_2.tif:0007-0152	3.874	795.154	83	2622	59.813	24.588	0.505	3080.61	118478	3.678	0.272	0.839	1.58738
37	ARL13B_KAN583-10_2.tif:0008-0176	2.548	709.306	97	1805	23.159	28.582	0.441	1807.42	69512	3.88	0.258	0.742	0.931329
38	ARL13B_KAN583-10_2.tif:0009-0236	3.432	584.826	82	2476	95.709	38.099	0.488	2007.24	77197	3.966	0.252	0.781	1.03429
39	ARL13B_KAN583-10_2.tif:0010-0243	2.86	623.118	79	2084	222.264	39.08	0.506	1782.22	68543	3.326	0.301	0.726	0.918346
40	ARL13B_KAN583-10_2.tif:0011-0325	3.9	815.387	60	2799	102.832	52.276	0.503	3180.2	122308	3.817	0.262	0.845	1.6387
41	ARL13B_KAN583-10_2.tif:0012-0331	2.184	354.167	151	711	16.113	53.291	0.365	773.547	29750	5.517	0.181	0.743	0.398594
42	ARL13B_KAN583-10_2.tif:0013-0336	3.094	354.538	57	799	151.413	54.274	0.507	1097.01	42190	3.75	0.267	0.768	0.565266
43	ARL13B_KAN583-10_2.tif:0014-0370	2.158	460.651	42	1199	86.736	59.741	0.387	994.144	38234	4.679	0.214	0.706	0.512263
44	ARL13B_KAN583-10_2.tif:0015-0421	2.808	416.824	146	957	69.208	68.048	0.542	1170.51	45017	3.217	0.311	0.806	0.603142
45	ARL13B_KAN583-10_2.tif:0016-0425	2.782	393.121	0	2230	121.442	68.708	0.55	1093.73	42064	2.013	0.497	0.746	0.563578
46	ARL13B_KAN583-10_2.tif:0017-0457	3.848	658.872	151	2604	56.301	73.65	0.538	2535.49	97513	2.911	0.344	0.781	1.30649
47	ARL13B_KAN583-10_2.tif:0018-0517	3.536	739.654	129	2263	169.746	83.209	0.421	2615.58	100593	4.326	0.231	0.764	1.34776
48	ARL13B_KAN583-10_2.tif:0019-0514	2.86	560.564	116	1916	35.576	83.192	0.579	1603.31	61662	2.456	0.407	0.764	0.826154
49	ARL13B_KAN583-10_2.tif:0020-0531	1.716	601.576	138	1482	6.548	85.787	0.477	1032.37	39704	3.931	0.254	0.781	0.531958
50	ARL13B_KAN583-10_2.tif:0021-0557	2.99	402.652	83	1741	152.606	89.967	0.402	1204	46305	4.098	0.244	0.653	0.620399
51	ARL13B_KAN583-10_2.tif:0022-0581	2.262	240.713	27	430	192.995	93.711	0.485	544.525	20942	2.73	0.366	0.674	0.280583
52	ARL13B_KAN583-10_2.tif:0023-0717	2.834	293.266	120	532	7.63	115.661	0.198	831.166	31966	10.13	0.099	0.616	0.428284
53	ARL13B_KAN583-10_2.tif:0024-0744	2.73	472.019	97	1319	65.705	120.003	0.462	1288.69	49562	3.62	0.276	0.693	0.664037
54	ARL13B_KAN583-10_2.tif:0025-0796	2.6	650.69	13	1861	219.885	128.273	0.461	1691.9	65069	3.139	0.319	0.662	0.871801
55	ARL13B_KAN583-10_2.tif:0026-0809	3.302	786.583	74	2503	114.22	130.435	0.474	2597.45	99896	3.597	0.278	0.774	1.33842
56	ARL13B_KAN583-10_2.tif:0027-0846	2.496	623.583	150	1919	168.565	136.564	0.479	1556.56	59864	3.592	0.278	0.744	0.802064
57	ARL13B_KAN583-10_2.tif:0028-0860	2.184	481.036	110	1270	37.942	138.832	0.422	1050.64	40407	4.548	0.22	0.747	0.541377
58	ARL13B_KAN583-10_2.tif:0029-0903	3.094	481.504	144	1542	100.117	145.517	0.37	1489.86	57299	5.044	0.198	0.669	0.767698
59	ARL13B_KAN583-10_2.tif:0030-0977	2.34	387.033	90	1132	27.717	157.654	0.32	905.713	34833	6.042	0.166	0.627	0.466696
60	ARL13B_KAN583-10_2.tif:0031-1012	2.34	646.644	151	1606	12.355	163.282	0.452	1513.24	58198	4.543	0.22	0.789	0.779743
61	ARL13B_KAN583-10_2.tif:0032-1018	2.938	279.761	113	541	126.956	164.256	0.567	821.987	31613	2.971	0.337	0.774	0.423554
62	ARL13B_KAN583-10_3.tif:0001-0092	2.938	1124.7	108	4077	103.72	14.713	0.531	3304.57	127091	3.513	0.285	0.843	1.70278
63	ARL13B_KAN583-10_3.tif:0002-0122	3.77	924.71	40	3181	132.682	19.997	0.536	3486.37	134083	2.308	0.433	0.714	1.79646
64	ARL13B_KAN583-10_3.tif:0003-0198	2.86	535.109	132	2441	47.344	31.708	0.37	1530.5	58862	3.451	0.29	0.615	0.788639
65	ARL13B_KAN583-10_3.tif:0004-0205	3.952	642.783	162	1637	138.026	33.003	0.574	2540.43	97703	3.071	0.326	0.842	1.30903
66	ARL13B_KAN583-10_3.tif:0005-0212	3.38	578.162	44	1912	84.303	34.166	0.528	1954.3	75161	3.327	0.301	0.76	1.00701
67	ARL13B_KAN583-10_3.tif:0006-0257	2.73	766.248	150	2580	151.304	41.311	0.58	2091.98	80456	2.749	0.364	0.766	1.07796
68	ARL13B_KAN583-10_3.tif:0007-0290	1.56	249.567	49	508	94.073	46.835	0.406	389.347	14974	4.025	0.248	0.635	0.200623
69	ARL13B_KAN583-10_3.tif:0008-0299	2.47	332.453	43	1139	195.227	48.452	0.317	821.207	31583	5.353	0.187	0.597	0.423152
70	ARL13B_KAN583-10_3.tif:0009-0327	2.886	509.991	124	1269	222.529	52.732	0.546	1471.92	56609	3.033	0.33	0.825	0.758453
71	ARL13B_KAN583-10_3.tif:0010-0354	1.404	264.111	148	463	81.894	57.345	0.594	370.834	14262	1.123	0.891	0.735	0.191084
72	ARL13B_KAN583-10_3.tif:0011-0368	2.912	542.143	102	1903	34.097	59.419	0.412	1578.82	60720	4.437	0.225	0.718	0.813533
73	ARL13B_KAN583-10_3.tif:0012-0409	2.808	741.917	93	2629	135.505	66.129	0.477	2083.43	80127	3.912	0.256	0.742	1.07355
74	ARL13B_KAN583-10_3.tif:0013-0460	2.886	323.18	25	952	143.654	74.094	0.437	932.754	35873	3.862	0.259	0.661	0.48063
75	ARL13B_KAN583-10_3.tif:0014-0469	3.302	825.354	26	2795	87.817	75.607	0.495	2725.48	104820	3.364	0.297	0.734	1.40439
76	ARL13B_KAN583-10_3.tif:0015-0513	2.782	895.43	55	2669	71.074	82.609	0.447	2491.24	95811	2.179	0.459	0.639	1.28369
77	ARL13B_KAN583-10_3.tif:0016-0515	1.118	460.651	150	875	1.063	82.907	0.555	515.039	19808	2.977	0.336	0.775	0.26539
78	ARL13B_KAN583-10_3.tif:0017-0546	3.276	497.492	102	1539	131.183	88.124	0.343	1629.88	62684	6.417	0.156	0.72	0.839847
79	ARL13B_KAN583-10_3.tif:0018-0567	3.51	831.919	109	2926	153.628	91.571	0.426	2920.21	112309	3.92	0.255	0.742	1.50473
80	ARL13B_KAN583-10_3.tif:0019-0593	2.496	826.583	70	3546	48.247	95.621	0.544	2063.28	79352	3.096	0.323	0.741	1.06317
81	ARL13B_KAN583-10_3.tif:0020-0608	2.626	662.832	62	2170	207.499	97.924	0.446	1740.7	66946	3.764	0.266	0.727	0.896949
82	ARL13B_KAN583-10_3.tif:0021-0619	3.666	553.787	154	1834	178.724	99.923	0.519	2030.31	78084	3.731	0.268	0.813	1.04618
83	ARL13B_KAN583-10_3.tif:0022-0665	2.418	563.011	26	1532	7.836	107.326	0.372	1361.44	52360	3.798	0.263	0.628	0.701525
84	ARL13B_KAN583-10_3.tif:0023-0735	3.354	760.581	79	3213	161.716	118.667	0.469	2551.14	98115	3.814	0.262	0.761	1.31455
85	ARL13B_KAN583-10_3.tif:0024-0795	2.548	577.755	47	1770	31.483	128.174	0.427	1472.21	56620	3.471	0.288	0.66	0.758601
86	ARL13B_KAN583-10_3.tif:0025-0800	2.548	838.439	50	2779	87.743	128.595	0.385	2136.47	82167	3.219	0.311	0.641	1.10088
87	ARL13B_KAN583-10_3.tif:0026-0832	4.862	491.749	122	1277	175.902	134.235	0.556	2391.03	91957	3.201	0.312	0.842	1.23205
88	ARL13B_KAN583-10_3.tif:0027-0838	2.678	532.563	52	1312	181.459	134.898	0.367	1426.29	54854	4.853	0.206	0.718	0.73494
89	ARL13B_KAN583-10_3.tif:0028-0906	2.08	623.513	67	1972	62.097	146.133	0.516	1296.98	49881	4.097	0.244	0.851	0.668311
90	ARL13B_KAN583-10_3.tif:0029-0909	2.756	524.292	102	1722	82.265	146.807	0.346	1445.04	55575	4.756	0.21	0.642	0.7446
91	ARL13B_KAN583-10_4.tif:0001-0143	2.106	277.148	85	1024	221.977	23.293	0.331	583.709	22449	4.556	0.219	0.604	0.300774
92	ARL13B_KAN583-10_4.tif:0002-0211	3.406	297.832	95	695	148.472	34.111	0.547	1014.48	39016	3.418	0.293	0.801	0.52274
93	ARL13B_KAN583-10_4.tif:0003-0255	2.886	752.09	39	1957	217.029	41.192	0.373	2170.66	83482	4.745	0.211	0.79	1.1185
94	ARL13B_KAN583-10_4.tif:0004-0339	3.146	418.95	120	902	162.701	54.763	0.582	1318.1	50693	2.624	0.381	0.829	0.67919
95	ARL13B_KAN583-10_4.tif:0005-0358	2.392	438.163	0	1247	66.868	57.666	0.513	1048.15	40311	1.377	0.726	0.694	0.540091
96	ARL13B_KAN583-10_4.tif:0006-0437	0.364	166.357	109	193	140.956	70.57	0.379	60.558	2329	3.666	0.273	0.538	0.0312042
97	ARL13B_KAN583-10_4.tif:0007-0475	2.782	741.449	151	1857	21.604	76.379	0.532	2062.83	79335	2.528	0.396	0.74	1.06294
98	ARL13B_KAN583-10_4.tif:0008-0485	3.068	654.28	19	2410	171.424	78.519	0.55	2007.45	77205	2.663	0.376	0.781	1.0344
99	ARL13B_KAN583-10_4.tif:0009-0508	2.652	315.01	126	664	66.068	81.847	0.55	835.456	32131	3.372	0.297	0.803	0.430494
100	ARL13B_KAN583-10_4.tif:0010-0552	1.378	212.189	145	313	68.332	89.139	0.52	292.414	11246	2.876	0.348	0.785	0.150675
101	ARL13B_KAN583-10_4.tif:0011-0569	3.692	361.62	147	1191	191.96	91.822	0.423	1335.18	51350	4.573	0.219	0.726	0.687993
102	ARL13B_KAN583-10_4.tif:0012-0571	3.12	358.633	150	812	117.36	92.105	0.554	1119	43036	3.509	0.285	0.814	0.576601
103	ARL13B_KAN583-10_4.tif:0013-0671	2.106	420.901	126	1206	168.889	108.289	0.43	886.471	34093	3.289	0.304	0.661	0.456782
104	ARL13B_KAN583-10_4.tif:0014-0678	2.522	953.464	73	2812	202.353	109.47	0.489	2404.78	92486	3.117	0.321	0.74	1.23914
105	ARL13B_KAN583-10_4.tif:0015-0685	2.938	616.381	72	1540	218.552	110.534	0.595	1811.04	69651	2.595	0.385	0.771	0.933191
106	ARL13B_KAN583-10_4.tif:0016-0720	4.082	406.083	150	896	134.386	116.199	0.522	1657.73	63755	3.624	0.276	0.807	0.854196
107	ARL13B_KAN583-10_4.tif:0017-0807	3.302	717.606	143	2295	116.282	129.924	0.453	2369.68	91136	3.831	0.261	0.749	1.22105
108	ARL13B_KAN583-10_4.tif:0018-0856	2.678	556.534	46	1771	98.174	138.176	0.567	1490.49	57323	3.194	0.313	0.831	0.768019
109	ARL13B_KAN583-10_4.tif:0019-0864	2.236	409.047	96	1183	179.434	139.579	0.288	914.683	35178	5.636	0.177	0.625	0.471318
110	ARL13B_KAN583-10_4.tif:0020-0879	3.978	456.255	63	1253	78.642	141.584	0.481	1815.09	69807	3.744	0.267	0.872	0.935281
111	ARL13B_KAN583-10_4.tif:0021-0907	2.34	408.444	96	1147	44.349	146.297	0.517	955.818	36760	3.431	0.291	0.756	0.492514
112	ARL13B_KAN583-10_4.tif:0022-0921	3.094	274.521	77	611	19.215	148.628	0.41	849.419	32668	4.543	0.22	0.804	0.437689
113	ARL13B_KAN583-10_4.tif:0023-0956	3.068	369.568	143	736	181.337	154.176	0.535	1133.9	43609	3.902	0.256	0.825	0.584278
114	ARL13B_KAN583-10_4.tif:0024-0960	3.978	328.588	151	639	79.155	154.746	0.541	1307.2	50274	3.604	0.277	0.832	0.673576
115	ARL13B_KAN583-10_4.tif:0025-0991	3.848	618.959	24	1697	134.82	159.824	0.522	2381.9	91606	2.996	0.334	0.791	1.22735
116	ARL13B_KAN583-10_5.tif:0001-0040	2.054	428.025	165	893	209.732	6.451	0.4	879.217	33814	5.86	0.171	0.752	0.453043
117	ARL13B_KAN583-10_5.tif:0002-0064	2.652	657.049	99	1574	200.26	10.255	0.427	1742.6	67019	3.277	0.305	0.613	0.897927
118	ARL13B_KAN583-10_5.tif:0003-0070	2.99	473.165	125	1146	43.697	11.336	0.375	1414.85	54414	5.838	0.171	0.821	0.729044
119	ARL13B_KAN583-10_5.tif:0004-0082	2.262	341.586	130	880	107.367	13.385	0.371	772.715	29718	5.477	0.183	0.707	0.398165
120	ARL13B_KAN583-10_5.tif:0005-0076	2.158	388.554	62	1167	142.429	12.404	0.565	838.55	32250	3.361	0.298	0.814	0.432089
121	ARL13B_KAN583-10_5.tif:0006-0127	2.938	469.796	97	1647	160.376	20.645	0.341	1380.35	53087	4.775	0.209	0.679	0.711265
122	ARL13B_KAN583-10_5.tif:0007-0129	1.612	615.79	150	1983	128.651	21.004	0.552	992.714	38179	2.759	0.362	0.838	0.511526
123	ARL13B_KAN583-10_5.tif:0008-0136	2.262	446.782	0	1262	183.24	21.885	0.357	1010.68	38870	4.013	0.249	0.58	0.520784
124	ARL13B_KAN583-10_5.tif:0009-0184	2.132	570.037	100	1300	223.089	29.688	0.357	1215.39	46743	4.569	0.219	0.752	0.626268
125	ARL13B_KAN583-10_5.tif:0010-0246	2.886	352.919	15	1027	27.375	39.598	0.419	1018.59	39174	3.022	0.331	0.643	0.524857
126	ARL13B_KAN583-10_5.tif:0011-0265	2.08	259.712	91	667	80.796	42.774	0.421	540.235	20777	4.876	0.205	0.734	0.278372
127	ARL13B_KAN583-10_5.tif:0012-0298	3.38	600.138	67	2067	169.685	48.05	0.351	2028.59	78018	5.543	0.18	0.675	1.04529
128	ARL13B_KAN583-10_5.tif:0013-0314	2.262	772.448	153	1949	219.486	50.607	0.513	1747.38	67203	4.01	0.249	0.857	0.900393
129	ARL13B_KAN583-10_5.tif:0014-0369	3.744	677.924	86	2532	104.585	59.768	0.371	2538.3	97621	5.952	0.168	0.823	1.30794
130	ARL13B_KAN583-10_5.tif:0015-0379	2.418	348.581	132	1029	109.569	61.182	0.429	842.919	32418	4.351	0.23	0.694	0.43434
131	ARL13B_KAN583-10_5.tif:0016-0394	4.03	901.877	139	2727	140.52	63.652	0.502	3634.78	139791	3.98	0.251	0.852	1.87293
132	ARL13B_KAN583-10_5.tif:0017-0406	3.042	256.923	0	591	191.665	65.323	0.488	781.607	30060	2.081	0.481	0.68	0.402747
133	ARL13B_KAN583-10_5.tif:0018-0421	2.184	365.44	65	1168	79.8	68.042	0.42	798.17	30697	5.026	0.199	0.884	0.411282
134	ARL13B_KAN583-10_5.tif:0019-0495	2.184	268.393	60	687	120.838	79.744	0.376	586.205	22545	5.058	0.198	0.73	0.30206
135	ARL13B_KAN583-10_5.tif:0020-0588	2.21	733.376	119	2172	173.637	94.867	0.557	1620.86	62337	3.29	0.304	0.846	0.835198
136	ARL13B_KAN583-10_5.tif:0021-0645	3.224	746.379	93	2449	132.43	104.158	0.488	2406.47	92551	3.653	0.274	0.763	1.24001
137	ARL13B_KAN583-10_5.tif:0022-0691	3.64	994.121	151	2960	152.208	111.404	0.576	3618.82	139177	3.281	0.305	0.821	1.86471
138	ARL13B_KAN583-10_5.tif:0023-0701	3.328	658.719	55	2229	67.088	113.006	0.481	2192.35	84316	3.85	0.26	0.717	1.12967
139	ARL13B_KAN583-10_5.tif:0024-0737	1.95	347.4	84	963	199.235	118.95	0.285	677.471	26055	4.566	0.219	0.625	0.349088
140	ARL13B_KAN583-10_5.tif:0025-0763	3.536	735.199	134	1984	14.364	123.234	0.52	2599.82	99987	3.182	0.314	0.807	1.33964
141	ARL13B_KAN583-10_5.tif:0026-0779	2.314	452.517	67	1726	128.282	125.725	0.528	1047.19	40274	2.96	0.338	0.73	0.539595
142	ARL13B_KAN583-10_5.tif:0027-0812	3.51	696.874	59	2443	95.228	130.876	0.533	2446.18	94078	3.064	0.326	0.742	1.26047
143	ARL13B_KAN583-10_5.tif:0028-0834	2.184	1379.33	37	4542	184.814	134.684	0.542	3012.64	115864	2.599	0.385	0.828	1.55236
144	ARL13B_KAN583-10_5.tif:0029-0849	1.456	468.714	142	1718	168.774	136.953	0.579	682.489	26248	3.292	0.304	0.794	0.351673
145	ARL13B_KAN583-10_5.tif:0030-0980	2.418	543.344	144	1763	126.324	158.109	0.411	1313.88	50531	4.255	0.235	0.756	0.67702
146	ARL13B_KAN583-10_5.tif:0031-1012	3.016	831.759	110	2108	200.713	163.138	0.472	2508.74	96484	4.219	0.237	0.811	1.2927
147	ARL13B_KAN583-10_6.tif:0001-0103	1.69	533.508	177	1238	23.822	16.58	0.525	901.682	34678	3.602	0.278	0.756	0.464619
148	ARL13B_KAN583-10_6.tif:0002-0161	2.756	705.349	49	2598	76.72	26.126	0.55	1944.06	74767	2.851	0.351	0.803	1.00174
149	ARL13B_KAN583-10_6.tif:0003-0177	4.056	649.878	131	2294	41.556	28.496	0.366	2636.07	101381	5.741	0.174	0.707	1.35831
150	ARL13B_KAN583-10_6.tif:0004-0205	2.496	283.74	44	897	188.14	32.966	0.422	708.257	27239	3.297	0.303	0.649	0.364951
151	ARL13B_KAN583-10_6.tif:0005-0209	3.016	672.25	77	1968	99.958	33.729	0.495	2027.63	77981	3.688	0.271	0.823	1.0448
152	ARL13B_KAN583-10_6.tif:0006-0285	2.288	288.795	35	772	4.211	45.885	0.315	660.804	25414	5.189	0.193	0.624	0.340499
153	ARL13B_KAN583-10_6.tif:0007-0294	2.522	267.876	116	523	140.578	47.751	0.456	675.625	25984	2.746	0.364	0.662	0.348136
154	ARL13B_KAN583-10_6.tif:0008-0293	2.366	303.165	111	974	60.852	47.047	0.461	717.331	27588	4.004	0.25	0.734	0.369627
155	ARL13B_KAN583-10_6.tif:0009-0318	2.704	446.096	13	949	10.162	51.305	0.399	1206.32	46394	4.358	0.229	0.65	0.621592
156	ARL13B_KAN583-10_6.tif:0010-0328	3.068	781.653	39	2974	115.238	52.967	0.456	2398.25	92235	4.288	0.233	0.717	1.23577
157	ARL13B_KAN583-10_6.tif:0011-0393	1.846	666.944	89	2064	51.699	63.222	0.402	1231.25	47353	3.464	0.289	0.683	0.63444
158	ARL13B_KAN583-10_6.tif:0012-0397	4.576	482.466	98	1284	177.91	63.998	0.445	2207.9	84914	4.196	0.238	0.838	1.13769
159	ARL13B_KAN583-10_6.tif:0013-0427	2.21	396.8	46	900	6.544	68.731	0.341	876.981	33728	4.63	0.216	0.697	0.451891
160	ARL13B_KAN583-10_6.tif:0014-0436	1.716	273.803	13	688	183.864	70.354	0.486	469.874	18071	4.583	0.218	0.852	0.242117
161	ARL13B_KAN583-10_6.tif:0015-0515	3.224	547.734	42	1789	127.267	83.24	0.441	1766	67919	4.682	0.214	0.79	0.909986
162	ARL13B_KAN583-10_6.tif:0016-0557	2.106	754.568	84	2074	5.298	89.829	0.599	1589.22	61120	2.685	0.372	0.857	0.818892
163	ARL13B_KAN583-10_6.tif:0017-0627	2.938	670.876	128	2356	52.758	100.949	0.544	1971.15	75809	3.474	0.288	0.822	1.0157
164	ARL13B_KAN583-10_6.tif:0018-0631	2.236	317.953	58	840	220.613	101.769	0.332	710.987	27344	5.504	0.182	0.61	0.366358
165	ARL13B_KAN583-10_6.tif:0019-0660	2.756	599.736	136	1522	24.959	106.533	0.56	1652.97	63572	3.467	0.288	0.822	0.851744
166	ARL13B_KAN583-10_6.tif:0020-0677	2.964	693.658	9	2199	103.627	109.479	0.315	2056.13	79077	3.608	0.277	0.605	1.05948
167	ARL13B_KAN583-10_6.tif:0021-0740	2.834	341.174	61	823	203.464	119.096	0.467	966.946	37188	3.381	0.296	0.732	0.498249
168	ARL13B_KAN583-10_6.tif:0022-0750	3.432	480.758	39	1883	173.009	120.84	0.415	1650.06	63460	4.877	0.205	0.788	0.850244
169	ARL13B_KAN583-10_6.tif:0023-0764	2.418	482.43	79	1148	30.647	123.102	0.416	1166.59	44866	4.457	0.224	0.669	0.601119
170	ARL13B_KAN583-10_6.tif:0024-0777	2.418	574.398	73	1601	22.741	125.271	0.378	1388.98	53419	3.879	0.258	0.624	0.715713
171	ARL13B_KAN583-10_6.tif:0025-0841	1.924	660.297	83	1868	42.712	135.559	0.504	1270.49	48862	3.218	0.311	0.855	0.654658
172	ARL13B_KAN583-10_6.tif:0026-0889	2.21	441.647	146	1140	12.427	143.367	0.414	976.099	37540	4.101	0.244	0.669	0.502965
173	ARL13B_KAN583-10_6.tif:0027-0923	2.34	640.222	154	1464	30.897	148.959	0.49	1498.21	57620	4.001	0.25	0.822	0.771999
174	ARL13B_KAN583-10_6.tif:0028-0963	3.978	568.549	88	1437	192.301	155.111	0.525	2261.82	86988	2.114	0.473	0.712	1.16547
175	ARL13B_KAN583-10_6.tif:0029-0961	2.522	564.969	54	1497	51.054	154.862	0.462	1424.94	54802	3.715	0.269	0.716	0.734243
176	ARL13B_KAN583-10_6.tif:0030-0971	1.95	342.187	92	1136	134.737	156.672	0.369	667.304	25664	4.422	0.226	0.598	0.343849
										60319				0.80816
177	ARL13B_KAN583-11_1.tif:0001-0062	4.55	244.263	132	388	117.953	9.992	0.406	1111.46	42746	4.901	0.204	0.785	0.572715
178	ARL13B_KAN583-11_1.tif:0002-0142	3.952	473.625	115	1160	215.349	22.756	0.553	1871.88	71991	2.517	0.397	0.751	0.964543
179	ARL13B_KAN583-11_1.tif:0003-0154	4.264	302.311	104	599	27.285	24.78	0.406	1289.13	49579	5.178	0.193	0.845	0.664265
180	ARL13B_KAN583-11_1.tif:0004-0258	3.744	326.153	127	726	146.824	41.579	0.43	1221.19	46966	4.491	0.223	0.825	0.629255
181	ARL13B_KAN583-11_1.tif:0005-0279	1.326	529.51	120	1790	46.562	45.142	0.534	702.172	27005	3.571	0.28	0.756	0.361816
182	ARL13B_KAN583-11_1.tif:0006-0325	3.64	526.757	133	1915	167.335	52.639	0.445	1917.51	73746	4.003	0.25	0.705	0.988057
183	ARL13B_KAN583-11_1.tif:0007-0330	4.134	475.434	109	1045	42.5	53.276	0.556	1965.56	75594	3.109	0.322	0.83	1.01282
184	ARL13B_KAN583-11_1.tif:0008-0349	4.81	303.081	79	919	109.507	56.449	0.391	1457.91	56070	4.928	0.203	0.755	0.751232
185	ARL13B_KAN583-11_1.tif:0009-0427	3.068	220.966	94	371	201.623	68.917	0.385	677.965	26074	4.515	0.222	0.747	0.349342
186	ARL13B_KAN583-11_1.tif:0010-0443	3.9	738.013	69	2094	81.912	71.743	0.441	2878.43	110702	3.54	0.283	0.721	1.4832
187	ARL13B_KAN583-11_1.tif:0011-0496	7.124	476.036	0	1768	116.208	80.019	0.432	3391.49	130434	1.69	0.592	0.644	1.74757
188	ARL13B_KAN583-11_1.tif:0012-0599	3.64	888.886	157	2470	138.564	96.724	0.572	3235.74	124444	3.45	0.29	0.851	1.66731
189	ARL13B_KAN583-11_1.tif:0013-0646	3.068	254.746	29	604	223.177	104.125	0.368	781.607	30060	4.285	0.233	0.733	0.402747
190	ARL13B_KAN583-11_1.tif:0014-0700	3.926	944.252	50	2792	87.099	112.51	0.3	3707.36	142582	5.602	0.178	0.759	1.91033
191	ARL13B_KAN583-11_1.tif:0015-0694	4.056	406.244	152	863	207.328	111.964	0.529	1647.82	63374	3.43	0.292	0.821	0.849091
192	ARL13B_KAN583-11_1.tif:0016-0727	2.652	585.863	95	1610	29.806	117.169	0.43	1553.8	59758	4.13	0.242	0.761	0.800644
193	ARL13B_KAN583-11_1.tif:0017-0742	4.342	780.731	105	2440	107.501	119.763	0.348	3390.14	130382	5.411	0.185	0.726	1.74687
194	ARL13B_KAN583-11_1.tif:0018-0764	3.042	256.094	21	740	82.555	123.376	0.406	779.085	29963	3.958	0.253	0.634	0.401447
195	ARL13B_KAN583-11_1.tif:0019-0783	3.406	548.908	152	1599	123.982	126.289	0.515	1869.69	71907	2.804	0.357	0.708	0.963417
196	ARL13B_KAN583-11_1.tif:0020-0815	2.522	670.979	71	2144	54.101	131.358	0.536	1692.31	65085	3.066	0.326	0.735	0.872016
197	ARL13B_KAN583-11_1.tif:0021-0906	2.574	600.556	138	1653	210.325	146.207	0.457	1545.92	59455	4.657	0.215	0.744	0.796584
198	ARL13B_KAN583-11_1.tif:0022-0983	2.6	482.54	72	1413	102.997	158.515	0.436	1254.68	48254	4.107	0.243	0.735	0.646512
199	ARL13B_KAN583-11_1.tif:0023-0985	4.29	640.909	156	1460	222.641	158.925	0.584	2749.67	105750	3.315	0.302	0.859	1.41685
200	ARL13B_KAN583-11_1.tif:0024-0997	2.938	378.425	51	923	191.477	160.998	0.398	1111.88	42762	3.198	0.313	0.633	0.57293
201	ARL13B_KAN583-11_1.tif:0025-1008	2.652	727.843	112	1951	95.789	162.597	0.367	1930.36	74240	4.801	0.208	0.736	0.994675
202	ARL13B_KAN583-11_1.tif:0026-1008	1.066	196.488	153	290	23.576	162.695	0.549	209.469	8056	3.524	0.284	0.701	0.107935
203	ARL13B_KAN583-11_1.tif:0027-1027	2.964	366.175	159	1093	3.296	165.587	0.503	1085.41	41744	3.944	0.254	0.794	0.55929
204	ARL13B_KAN583-11_2.tif:0001-0022	2.366	707.319	93	1959	148.47	3.63	0.436	1673.62	64366	3.359	0.298	0.755	0.862382
205	ARL13B_KAN583-11_2.tif:0002-0039	2.886	1029.68	151	3079	162.342	6.282	0.592	2971.85	114295	2.721	0.368	0.822	1.53134
206	ARL13B_KAN583-11_2.tif:0003-0099	3.484	659.604	109	2328	92.518	15.934	0.339	2298.2	88387	5.375	0.186	0.687	1.18422
207	ARL13B_KAN583-11_2.tif:0004-0155	3.016	912.853	60	2594	121.025	25.229	0.438	2753.33	105891	2.171	0.461	0.672	1.41874
208	ARL13B_KAN583-11_2.tif:0005-0170	1.222	204	89	328	54.333	27.668	0.251	249.303	9588	5.087	0.197	0.475	0.128461
209	ARL13B_KAN583-11_2.tif:0006-0277	4.706	981.514	122	3788	145.305	44.876	0.478	4619.28	177654	2.723	0.367	0.708	2.38023
210	ARL13B_KAN583-11_2.tif:0007-0311	1.69	424.446	82	888	11.894	50.187	0.483	717.357	27589	4.508	0.222	0.747	0.36964
211	ARL13B_KAN583-11_2.tif:0008-0340	3.406	437.084	113	1701	31.239	54.762	0.439	1488.8	57258	4.689	0.213	0.736	0.767149
212	ARL13B_KAN583-11_2.tif:0009-0365	2.6	511.54	6	1614	72.016	58.71	0.49	1330.08	51154	2.786	0.359	0.702	0.685367
213	ARL13B_KAN583-11_2.tif:0010-0457	2.938	1029.4	132	3301	171.478	73.711	0.551	3024.55	116322	2.981	0.336	0.774	1.55849
214	ARL13B_KAN583-11_2.tif:0011-0513	3.536	326.419	151	778	121.168	82.638	0.524	1154.29	44393	2.871	0.348	0.737	0.594782
215	ARL13B_KAN583-11_2.tif:0012-0508	3.276	402.341	32	1176	46.376	81.887	0.34	1318.15	50695	5.885	0.17	0.645	0.679217
216	ARL13B_KAN583-11_2.tif:0013-0560	1.898	378.973	146	955	91.978	90.383	0.336	719.333	27665	4.565	0.219	0.603	0.370659
217	ARL13B_KAN583-11_2.tif:0014-0569	4.498	386.474	143	1053	183.765	91.501	0.455	1738.46	66860	2.876	0.348	0.672	0.895797
218	ARL13B_KAN583-11_2.tif:0015-0588	1.3	172.68	131	236	219.474	94.912	0.27	224.498	8634	6.715	0.149	0.588	0.115679
219	ARL13B_KAN583-11_2.tif:0016-0640	1.872	300.264	150	626	214.583	103.341	0.581	562.128	21619	3.264	0.306	0.828	0.289654
220	ARL13B_KAN583-11_2.tif:0017-0650	3.224	676.315	140	1736	185.506	104.927	0.56	2180.57	83863	3.244	0.308	0.816	1.12361
221	ARL13B_KAN583-11_2.tif:0018-0721	5.148	456.586	97	1070	140.863	116.372	0.441	2350.65	90404	4.159	0.24	0.795	1.21124
222	ARL13B_KAN583-11_2.tif:0019-0720	3.354	658.225	150	2052	210.426	116.077	0.448	2207.82	84911	4.111	0.243	0.746	1.13765
223	ARL13B_KAN583-11_2.tif:0020-0819	3.354	726.395	146	1656	223.231	132.002	0.459	2436.48	93705	3.363	0.297	0.801	1.25547
224	ARL13B_KAN583-11_2.tif:0021-0855	3.146	453.479	119	1330	181.663	137.972	0.257	1426.73	54871	7.258	0.138	0.608	0.735167
225	ARL13B_KAN583-11_2.tif:0022-0884	3.77	687.028	48	1695	117.996	142.482	0.376	2590.25	99619	5.427	0.184	0.799	1.33471
226	ARL13B_KAN583-11_2.tif:0023-0887	2.158	818.518	164	1993	38.287	143.032	0.534	1766.47	67937	3.873	0.258	0.798	0.910227
227	ARL13B_KAN583-11_2.tif:0024-0900	2.886	302.865	134	628	134.707	145.195	0.584	874.121	33618	3.016	0.332	0.86	0.450417
228	ARL13B_KAN583-11_2.tif:0025-0903	3.042	576.573	133	1527	204.264	145.647	0.443	1754.04	67459	4.427	0.226	0.762	0.903823
229	ARL13B_KAN583-11_2.tif:0026-0942	3.614	477.755	40	1343	13.478	152.093	0.306	1726.71	66408	7.849	0.127	0.832	0.889741
230	ARL13B_KAN583-11_2.tif:0027-0968	0.416	160.688	120	196	184.077	156.13	0.588	66.85	2571	3.421	0.292	0.821	0.0344465
231	ARL13B_KAN583-11_3.tif:0001-0020	2.782	1099.11	158	3477	113.378	3.206	0.517	3057.91	117605	3.915	0.255	0.801	1.57568
232	ARL13B_KAN583-11_3.tif:0002-0031	2.236	600.802	65	1749	65.719	5.089	0.457	1343.47	51669	3.329	0.3	0.754	0.692267
233	ARL13B_KAN583-11_3.tif:0003-0073	2.99	562.583	152	1121	30.506	11.935	0.488	1682.22	64697	4.024	0.249	0.769	0.866817
234	ARL13B_KAN583-11_3.tif:0004-0074	2.652	715.676	67	2506	160.019	12.121	0.5	1898.09	72999	3.421	0.292	0.791	0.978048
235	ARL13B_KAN583-11_3.tif:0005-0078	2.86	500.927	79	1396	139.615	12.67	0.377	1432.74	55102	5.417	0.185	0.748	0.738262
236	ARL13B_KAN583-11_3.tif:0006-0103	3.744	677.771	150	1465	209.073	16.727	0.561	2537.73	97599	3.325	0.301	0.809	1.30764
237	ARL13B_KAN583-11_3.tif:0007-0139	3.302	723.441	129	1890	219.513	22.54	0.495	2388.95	91877	3.69	0.271	0.849	1.23098
238	ARL13B_KAN583-11_3.tif:0008-0167	2.392	674.804	61	2179	204.724	26.915	0.423	1614.23	62082	3.838	0.261	0.724	0.831781
239	ARL13B_KAN583-11_3.tif:0009-0224	2.288	634.341	97	2364	126.292	36.136	0.543	1451.46	55822	3.446	0.29	0.782	0.747909
240	ARL13B_KAN583-11_3.tif:0010-0230	2.652	728.784	51	2506	64.231	36.963	0.575	1932.85	74336	3.004	0.333	0.843	0.995961
241	ARL13B_KAN583-11_3.tif:0011-0338	3.484	510.522	88	1826	215.316	54.59	0.503	1778.77	68410	3.558	0.281	0.772	0.916564
242	ARL13B_KAN583-11_3.tif:0012-0362	3.874	977.826	55	3748	127.701	58.442	0.496	3788.32	145696	3.734	0.268	0.805	1.95205
243	ARL13B_KAN583-11_3.tif:0013-0383	3.9	626.253	20	1793	197.82	61.964	0.487	2442.53	93938	3.569	0.28	0.817	1.25859
244	ARL13B_KAN583-11_3.tif:0014-0389	2.626	694.97	119	2150	187.027	62.891	0.526	1825.1	70192	3.372	0.297	0.811	0.94044
245	ARL13B_KAN583-11_3.tif:0015-0456	2.782	941.598	113	3062	53.51	73.502	0.532	2619.68	100751	3.29	0.304	0.748	1.34987
246	ARL13B_KAN583-11_3.tif:0016-0488	3.172	512.844	127	1293	5.938	78.597	0.554	1626.84	62567	2.984	0.335	0.78	0.838279
247	ARL13B_KAN583-11_3.tif:0017-0580	3.874	727.456	116	2150	117.883	93.535	0.315	2818.34	108391	3.852	0.26	0.589	1.45223
248	ARL13B_KAN583-11_3.tif:0018-0579	2.132	651.159	147	2361	39.607	93.342	0.554	1388.35	53395	3.164	0.316	0.8	0.715392
249	ARL13B_KAN583-11_3.tif:0019-0661	2.704	459.606	114	1219	183.068	106.603	0.432	1242.85	47799	4.016	0.249	0.669	0.640416
250	ARL13B_KAN583-11_3.tif:0020-0740	2.99	1202.88	151	3438	153.222	119.46	0.555	3596.82	138331	3.628	0.276	0.816	1.85337
251	ARL13B_KAN583-11_3.tif:0021-0880	2.912	655.545	98	1775	165.156	141.766	0.469	1909.06	73421	3.232	0.309	0.711	0.983702
252	ARL13B_KAN583-11_3.tif:0022-0896	3.276	458.889	149	1047	54.139	144.516	0.544	1503.41	57820	3.463	0.289	0.84	0.774678
253	ARL13B_KAN583-11_4.tif:0001-0009	2.678	760.738	87	2691	53.246	1.436	0.469	2037.38	78356	3.06	0.327	0.703	1.04982
254	ARL13B_KAN583-11_4.tif:0002-0063	5.98	602.97	94	2229	102.96	10.243	0.405	3605.97	138683	5.193	0.193	0.78	1.85809
255	ARL13B_KAN583-11_4.tif:0003-0136	2.08	222.35	0	638	129.456	22.059	0.538	462.516	17788	2.804	0.357	0.748	0.238325
256	ARL13B_KAN583-11_4.tif:0004-0169	4.134	661.05	85	1554	184.569	27.356	0.539	2732.95	105107	3.174	0.315	0.781	1.40823
257	ARL13B_KAN583-11_4.tif:0005-0187	3.25	444.288	156	978	41.643	30.255	0.572	1444.02	55536	3.283	0.305	0.831	0.744077
258	ARL13B_KAN583-11_4.tif:0006-0261	4.16	476.2	135	1448	102.408	42.044	0.42	1981.11	76192	4.738	0.211	0.732	1.02083
259	ARL13B_KAN583-11_4.tif:0007-0315	2.262	570.989	150	2390	129.399	50.917	0.411	1291.65	49676	4.647	0.215	0.685	0.665564
260	ARL13B_KAN583-11_4.tif:0008-0341	5.46	575.652	150	1337	184.551	55.013	0.423	3143.25	120887	4.703	0.213	0.847	1.61966
261	ARL13B_KAN583-11_4.tif:0009-0349	1.04	197.175	95	345	6.281	56.123	0.403	205.074	7887	4.147	0.241	0.816	0.105671
262	ARL13B_KAN583-11_4.tif:0010-0354	2.392	297.239	150	555	107.23	57.195	0.479	711.039	27346	3.134	0.319	0.786	0.366385
263	ARL13B_KAN583-11_4.tif:0011-0417	4.524	547.839	80	1800	128.305	67.199	0.536	2478.57	95324	2.96	0.338	0.815	1.27716
264	ARL13B_KAN583-11_4.tif:0012-0492	3.614	617.331	152	2138	155.678	79.408	0.551	2231.17	85809	2.821	0.354	0.792	1.14968
265	ARL13B_KAN583-11_4.tif:0013-0526	3.978	953.359	151	2742	104.911	84.739	0.484	3792.69	145864	3.451	0.29	0.754	1.9543
266	ARL13B_KAN583-11_4.tif:0014-0599	4.836	730.263	150	2058	189.216	96.729	0.526	3531.77	135829	3.467	0.288	0.81	1.81985
267	ARL13B_KAN583-11_4.tif:0015-0620	3.38	893.446	98	3448	80.357	100.071	0.464	3020.03	116148	3.794	0.264	0.712	1.55616
268	ARL13B_KAN583-11_4.tif:0016-0726	2.73	535.61	68	1885	166.23	117.045	0.564	1462.3	56239	3.319	0.301	0.879	0.753496
269	ARL13B_KAN583-11_4.tif:0017-0766	2.782	897.57	154	2703	136.59	123.458	0.579	2497.19	96040	2.996	0.334	0.801	1.28675
270	ARL13B_KAN583-11_4.tif:0018-0832	3.744	770.833	42	2241	59.446	134.122	0.371	2886.17	111000	4.192	0.239	0.697	1.48719
271	ARL13B_KAN583-11_4.tif:0019-0851	3.328	472.273	85	1356	42.144	136.969	0.53	1571.82	60451	2.1	0.476	0.686	0.809929
272	ARL13B_KAN583-11_4.tif:0020-0884	3.484	572.276	150	1729	61.885	142.429	0.516	1993.93	76685	3.241	0.309	0.784	1.02743
273	ARL13B_KAN583-11_4.tif:0021-1028	2.392	859.957	99	2724	145.381	165.819	0.437	2057.14	79116	3.698	0.27	0.697	1.06
274	ARL13B_KAN583-11_5.tif:0001-0019	3.536	650.228	152	2199	144.308	3.055	0.513	2299.34	88431	4.09	0.244	0.793	1.18481
275	ARL13B_KAN583-11_5.tif:0002-0051	4.758	625.765	86	1624	182.061	8.148	0.536	2977.57	114515	2.948	0.339	0.813	1.53428
276	ARL13B_KAN583-11_5.tif:0003-0054	2.808	239.176	19	488	188.83	8.694	0.469	671.646	25831	3.902	0.256	0.774	0.346086
277	ARL13B_KAN583-11_5.tif:0004-0062	4.238	374.81	31	841	71.541	10.245	0.483	1588.54	61094	3.582	0.279	0.743	0.818544
278	ARL13B_KAN583-11_5.tif:0005-0067	2.054	554.62	121	1208	1.181	10.727	0.526	1139.26	43815	3.26	0.307	0.798	0.587038
279	ARL13B_KAN583-11_5.tif:0006-0129	1.092	163.857	82	224	149.678	20.771	0.572	178.943	6882	1.921	0.52	0.712	0.0922057
280	ARL13B_KAN583-11_5.tif:0007-0139	4.524	423.54	161	824	76.203	22.367	0.597	1916.21	73696	2.947	0.339	0.849	0.987387
281	ARL13B_KAN583-11_5.tif:0008-0179	3.77	957.4	115	2633	37.598	28.805	0.473	3609.61	138823	3.454	0.29	0.729	1.85996
282	ARL13B_KAN583-11_5.tif:0009-0212	3.926	1017.07	72	3182	166.252	34.079	0.443	3993.27	153578	4.343	0.23	0.791	2.05765
283	ARL13B_KAN583-11_5.tif:0010-0267	3.692	1026.57	59	3581	90.507	43.304	0.419	3790.33	145773	3.571	0.28	0.668	1.95308
284	ARL13B_KAN583-11_5.tif:0011-0267	4.654	550.978	0	1780	74.492	42.618	0.512	2564.4	98625	2.228	0.449	0.74	1.32139
285	ARL13B_KAN583-11_5.tif:0012-0305	3.77	337.807	61	785	55.724	48.983	0.223	1273.61	48982	3.289	0.304	0.415	0.656266
286	ARL13B_KAN583-11_5.tif:0013-0323	3.276	764.31	150	3186	121.512	52.006	0.556	2504.03	96303	2.371	0.422	0.748	1.29028
287	ARL13B_KAN583-11_5.tif:0014-0370	4.108	807.93	135	2695	183.549	59.449	0.402	3319.18	127653	3.923	0.255	0.675	1.71031
288	ARL13B_KAN583-11_5.tif:0015-0421	4.16	854.987	104	2429	58.781	67.499	0.342	3556.96	136798	3.569	0.28	0.577	1.83283
289	ARL13B_KAN583-11_5.tif:0016-0475	3.042	298.265	114	578	216.675	76.397	0.568	907.377	34897	2.355	0.425	0.755	0.467554
290	ARL13B_KAN583-11_5.tif:0017-0477	0.52	202.3	112	325	0.742	76.884	0.599	105.202	4046	2.775	0.36	0.851	0.0542087
291	ARL13B_KAN583-11_5.tif:0018-0491	3.146	536.43	14	2022	125.288	79.198	0.494	1687.71	64908	3.798	0.263	0.776	0.869644
292	ARL13B_KAN583-11_5.tif:0019-0539	2.262	621.506	117	1400	12.628	87.057	0.339	1405.93	54071	5.812	0.172	0.75	0.724449
293	ARL13B_KAN583-11_5.tif:0020-0543	2.314	334.787	133	884	219.661	87.572	0.599	774.743	29796	2.872	0.348	0.828	0.39921
294	ARL13B_KAN583-11_5.tif:0021-0557	3.042	801.932	71	2517	92.094	89.85	0.413	2439.62	93826	4.008	0.25	0.727	1.25709
295	ARL13B_KAN583-11_5.tif:0022-0576	2.678	532.107	100	1736	61.428	92.774	0.572	1425.07	54807	3.537	0.283	0.877	0.73431
296	ARL13B_KAN583-11_5.tif:0023-0589	4.446	510.93	0	1544	157.8	94.984	0.383	2271.73	87369	3.057	0.327	0.626	1.17058
297	ARL13B_KAN583-11_5.tif:0024-0631	1.664	169.203	100	259	11.408	101.729	0.415	281.571	10829	3.392	0.295	0.66	0.145088
298	ARL13B_KAN583-11_5.tif:0025-0649	4.654	918.318	38	3169	65.231	104.746	0.408	4274.11	164379	5.014	0.199	0.785	2.20237
299	ARL13B_KAN583-11_5.tif:0026-0659	3.666	786.404	49	2793	96.513	106.373	0.474	2883.13	110883	3.382	0.296	0.731	1.48562
300	ARL13B_KAN583-11_5.tif:0027-0831	3.406	636.427	31	2228	211.595	134.098	0.552	2167.8	83372	2.93	0.341	0.804	1.11703
301	ARL13B_KAN583-11_5.tif:0028-0840	5.252	1040.43	42	3454	89.689	135.183	0.359	5464.65	210166	4.605	0.217	0.658	2.81583
302	ARL13B_KAN583-11_5.tif:0029-0893	2.938	723.611	95	2991	201.616	144.081	0.444	2126.1	81768	4.499	0.222	0.748	1.09554
303	ARL13B_KAN583-11_5.tif:0030-0903	3.926	522.801	150	1230	13.306	145.503	0.52	2052.64	78943	3.534	0.283	0.77	1.05769
304	ARL13B_KAN583-11_5.tif:0031-0908	3.77	529.51	41	1325	7.446	146.388	0.362	1996.37	76779	4.939	0.202	0.723	1.02869
305	ARL13B_KAN583-11_5.tif:0032-1007	3.224	637.879	150	1880	89.734	162.541	0.358	2056.65	79097	3.826	0.261	0.634	1.05975
306	ARL13B_KAN583-11_5.tif:0033-1017	3.12	576.517	137	1411	47.854	163.92	0.381	1798.84	69182	5.528	0.181	0.734	0.926908
307	ARL13B_KAN583-11_6.tif:0001-0020	2.392	546.957	151	1240	4.417	3.216	0.429	1308.4	50320	4.479	0.223	0.705	0.674193
308	ARL13B_KAN583-11_6.tif:0002-0072	4.498	735.977	68	3193	143.053	11.5	0.505	3310.62	127324	3.921	0.255	0.83	1.7059
309	ARL13B_KAN583-11_6.tif:0003-0165	4.082	580.178	11	1728	110.655	26.517	0.446	2368.43	91088	3.482	0.287	0.701	1.22041
310	ARL13B_KAN583-11_6.tif:0004-0189	3.822	594.857	88	1972	79.345	30.544	0.406	2273.68	87444	4.342	0.23	0.739	1.17158
311	ARL13B_KAN583-11_6.tif:0005-0275	2.392	325.902	35	1328	211.197	44.267	0.412	779.605	29983	4.849	0.206	0.748	0.401715
312	ARL13B_KAN583-11_6.tif:0006-0283	3.354	518.605	152	1510	128.509	45.567	0.407	1739.51	66900	4.247	0.235	0.725	0.896333
313	ARL13B_KAN583-11_6.tif:0007-0336	4.55	928.451	150	2938	165.121	54.328	0.465	4224.71	162479	3.697	0.271	0.774	2.17691
314	ARL13B_KAN583-11_6.tif:0008-0352	2.938	770.708	151	2401	52.952	56.865	0.521	2264.48	87090	3.408	0.293	0.813	1.16684
315	ARL13B_KAN583-11_6.tif:0009-0359	2.236	424.849	43	1238	73.373	58.193	0.347	950.019	36537	5.121	0.195	0.669	0.489526
316	ARL13B_KAN583-11_6.tif:0010-0366	3.536	418.015	89	1065	183.789	59.159	0.403	1478.19	56850	4.886	0.205	0.76	0.761682
317	ARL13B_KAN583-11_6.tif:0011-0378	0.286	189.273	150	250	1.928	61.048	0.589	54.135	2082	1.289	0.776	0.667	0.0278949
318	ARL13B_KAN583-11_6.tif:0012-0456	2.496	457.219	71	1159	17.098	73.496	0.532	1141.29	43893	3.219	0.311	0.727	0.588083
319	ARL13B_KAN583-11_6.tif:0013-0498	5.07	666.426	117	2218	141.521	80.286	0.353	3378.98	129953	5.547	0.18	0.724	1.74112
320	ARL13B_KAN583-11_6.tif:0014-0531	3.276	892.04	133	3709	78.726	85.781	0.595	2922.5	112397	3.154	0.317	0.8	1.50591
321	ARL13B_KAN583-11_6.tif:0015-0545	2.99	734.374	54	1980	209.724	87.733	0.506	2195.91	84453	3.228	0.31	0.821	1.13151
322	ARL13B_KAN583-11_6.tif:0016-0604	4.212	859.438	141	3384	57.912	97.437	0.58	3620.17	139229	3.488	0.287	0.855	1.8654
323	ARL13B_KAN583-11_6.tif:0017-0657	3.562	404.686	54	1383	96.631	106.008	0.329	1441.58	55442	6.126	0.163	0.708	0.742818
324	ARL13B_KAN583-11_6.tif:0018-0662	4.16	1020.12	110	3146	168.863	107.047	0.51	4243.98	163220	3.154	0.317	0.758	2.18684
325	ARL13B_KAN583-11_6.tif:0019-0715	2.782	438.458	153	996	2.231	115.272	0.382	1219.86	46915	4.228	0.237	0.704	0.628572
326	ARL13B_KAN583-11_6.tif:0020-0716	3.38	1181.62	103	3681	179.444	115.327	0.485	3994.13	153611	3.568	0.28	0.815	2.0581
327	ARL13B_KAN583-11_6.tif:0021-0780	4.68	803.772	5	2425	139.535	125.616	0.487	3761.88	144679	3.811	0.262	0.793	1.93842
328	ARL13B_KAN583-11_6.tif:0022-0790	3.51	587.978	93	1656	35.963	127.293	0.386	2063.93	79377	5.271	0.19	0.783	1.0635
329	ARL13B_KAN583-11_6.tif:0023-0825	3.12	546	108	1525	69.374	133.092	0.474	1703.62	65520	4.152	0.241	0.787	0.877844
330	ARL13B_KAN583-11_6.tif:0024-0883	3.302	790.055	62	3043	78.156	142.345	0.448	2608.92	100337	4.088	0.245	0.743	1.34433
331	ARL13B_KAN583-11_6.tif:0025-0896	2.964	912.333	136	3431	99.43	144.412	0.501	2704.32	104006	3.263	0.306	0.75	1.39348
332	ARL13B_KAN583-11_6.tif:0026-0914	2.262	379.437	98	962	107.985	147.443	0.449	858.338	33011	4.217	0.237	0.696	0.442285
333	ARL13B_KAN583-11_6.tif:0027-0945	2.938	618.097	124	1358	30.537	152.439	0.29	1816.08	69845	5.919	0.169	0.661	0.935791
334	ARL13B_KAN583-11_6.tif:0028-0946	1.69	481.092	123	1125	198.579	152.596	0.557	813.095	31271	3.444	0.29	0.756	0.418972
335	ARL13B_KAN583-11_6.tif:0029-0956	3.874	456.443	104	927	144.198	154.414	0.593	1768.37	68010	2.674	0.374	0.795	0.911205
336	ARL13B_KAN583-11_6.tif:0030-1015	4.108	799.544	136	2314	185.501	163.783	0.41	3284.73	126328	5.039	0.198	0.771	1.69256
337	ARL13B_KAN583-11_6.tif:0031-1012	2.964	296.807	126	617	28.345	163.308	0.508	879.789	33836	3.488	0.287	0.797	0.453338
										77144.5				1.03359
338	ARL13B_KAN583-12_1.tif:0001-0038	3.64	637.771	150	1768	61.443	6.062	0.391	2321.63	89288	4.912	0.204	0.695	1.19629
339	ARL13B_KAN583-12_1.tif:0002-0049	4.186	604.801	104	2018	119.656	7.794	0.429	2531.85	97373	2.897	0.345	0.66	1.30461
340	ARL13B_KAN583-12_1.tif:0003-0074	2.808	537.852	153	1298	32.552	11.956	0.355	1510.38	58088	6.397	0.156	0.742	0.778269
341	ARL13B_KAN583-12_1.tif:0004-0072	4.55	958.583	21	3817	86.77	11.517	0.411	4361.81	167752	4.587	0.218	0.763	2.24756
342	ARL13B_KAN583-12_1.tif:0005-0072	1.924	353.703	151	958	210.418	11.549	0.5	680.565	26174	3.574	0.28	0.736	0.350682
343	ARL13B_KAN583-12_1.tif:0006-0173	2.964	890.649	86	3512	70.96	27.912	0.415	2640.04	101534	4.27	0.234	0.699	1.36036
344	ARL13B_KAN583-12_1.tif:0007-0190	3.822	674.673	150	1978	44.179	30.633	0.485	2578.76	99177	4.283	0.233	0.826	1.32878
345	ARL13B_KAN583-12_1.tif:0008-0193	3.588	725.717	131	2321	103.158	31.215	0.504	2604.03	100149	3.682	0.272	0.812	1.34181
346	ARL13B_KAN583-12_1.tif:0009-0209	3.432	678.538	68	1745	128.922	33.926	0.401	2328.88	89567	4.647	0.215	0.746	1.20003
347	ARL13B_KAN583-12_1.tif:0010-0243	3.692	623.951	73	2160	172.902	39.305	0.48	2303.76	88601	4.474	0.224	0.902	1.18709
348	ARL13B_KAN583-12_1.tif:0011-0289	3.874	657.973	32	1887	108.117	46.893	0.337	2549.14	98038	4.22	0.237	0.648	1.31352
349	ARL13B_KAN583-12_1.tif:0012-0292	3.692	516.613	68	1601	207.772	46.893	0.332	1907.45	73359	4.063	0.246	0.63	0.982871
350	ARL13B_KAN583-12_1.tif:0013-0328	2.782	610.579	33	2002	134.036	53.078	0.535	1698.73	65332	3.842	0.26	0.87	0.875325
351	ARL13B_KAN583-12_1.tif:0014-0350	1.638	256.857	111	504	10.017	56.375	0.466	420.757	16182	3.998	0.25	0.724	0.216808
352	ARL13B_KAN583-12_1.tif:0015-0377	3.224	896.887	21	3232	106.229	60.861	0.527	2891.74	111214	3.998	0.25	0.867	1.49006
353	ARL13B_KAN583-12_1.tif:0016-0395	3.952	422.059	106	997	132.868	63.718	0.562	1668.08	64153	2.97	0.337	0.828	0.859529
354	ARL13B_KAN583-12_1.tif:0017-0420	3.172	969.885	98	3611	38.516	67.835	0.598	3076.66	118326	3.333	0.3	0.871	1.58534
355	ARL13B_KAN583-12_1.tif:0018-0431	3.406	836.74	92	2725	74.976	69.661	0.434	2850.11	109613	4.209	0.238	0.738	1.46861
356	ARL13B_KAN583-12_1.tif:0019-0429	2.782	463.168	97	1134	200.618	69.32	0.527	1288.61	49559	2.809	0.356	0.762	0.663997
357	ARL13B_KAN583-12_1.tif:0020-0459	3.354	672.674	128	2084	160.519	74.003	0.416	2256.29	86775	4.743	0.211	0.735	1.16262
358	ARL13B_KAN583-12_1.tif:0021-0550	3.848	838.581	133	2644	47.899	88.903	0.406	3227.05	124110	5.074	0.197	0.811	1.66284
359	ARL13B_KAN583-12_1.tif:0022-0559	4.524	327.914	75	1283	124.044	90.319	0.412	1483.57	57057	4.472	0.224	0.786	0.764456
360	ARL13B_KAN583-12_1.tif:0023-0571	3.042	741.573	106	2829	149.598	92.063	0.452	2256	86764	4.158	0.241	0.734	1.16247
361	ARL13B_KAN583-12_1.tif:0024-0631	2.314	305.91	117	987	52.775	101.838	0.432	707.919	27226	3.162	0.316	0.718	0.364777
362	ARL13B_KAN583-12_1.tif:0025-0650	1.664	551.703	59	1405	6.526	104.933	0.57	918.089	35309	3.53	0.283	0.853	0.473074
363	ARL13B_KAN583-12_1.tif:0026-0661	2.782	909.589	157	2912	96.46	106.686	0.571	2530.63	97326	3.226	0.31	0.805	1.30398
364	ARL13B_KAN583-12_1.tif:0027-0758	3.562	478.723	150	1254	150.068	122.181	0.329	1705.31	65585	5.074	0.197	0.614	0.878715
365	ARL13B_KAN583-12_1.tif:0028-0782	2.262	464.402	53	1578	172.726	126.087	0.549	1050.54	40403	3.277	0.305	0.784	0.541324
366	ARL13B_KAN583-12_1.tif:0029-0790	2.964	882.842	48	2354	44.083	127.433	0.521	2616.9	100644	4.261	0.235	0.817	1.34844
367	ARL13B_KAN583-12_1.tif:0030-0859	2.652	691.657	75	2142	86.217	138.574	0.431	1834.38	70549	4.636	0.216	0.764	0.945223
368	ARL13B_KAN583-12_1.tif:0031-0921	1.56	256.817	125	478	181.89	148.544	0.298	400.658	15409	6.412	0.156	0.638	0.206451
369	ARL13B_KAN583-12_1.tif:0032-0927	5.07	843.179	33	2320	155.708	149.223	0.31	4275.18	164420	3.398	0.294	0.55	2.20292
370	ARL13B_KAN583-12_1.tif:0033-0981	2.21	458.129	24	1271	180.502	158.233	0.581	1012.53	38941	2.38	0.42	0.752	0.521736
371	ARL13B_KAN583-12_2.tif:0001-0012	2.626	529.822	134	1748	108.343	1.993	0.516	1391.4	53512	4.001	0.25	0.805	0.716959
372	ARL13B_KAN583-12_2.tif:0002-0014	1.742	224.552	52	460	190.914	2.437	0.49	391.194	15045	2.551	0.392	0.641	0.201574
373	ARL13B_KAN583-12_2.tif:0003-0053	2.21	464.918	129	1670	169.848	8.447	0.417	1027.53	39518	4.344	0.23	0.769	0.529466
374	ARL13B_KAN583-12_2.tif:0004-0063	2.054	205.747	32	461	64.96	10.266	0.435	422.629	16254	3.692	0.271	0.678	0.217773
375	ARL13B_KAN583-12_2.tif:0005-0080	0.338	135.538	1	220	40.592	12.943	0.323	45.815	1762	6.372	0.157	0.65	0.0236075
376	ARL13B_KAN583-12_2.tif:0006-0121	1.664	217.406	118	416	122.459	19.567	0.599	361.786	13914	2.156	0.464	0.771	0.186421
377	ARL13B_KAN583-12_2.tif:0007-0156	1.274	174.122	37	285	188.595	25.568	0.29	221.845	8532	2.609	0.383	0.471	0.114313
378	ARL13B_KAN583-12_2.tif:0008-0177	3.198	549.431	63	1623	197.718	28.645	0.413	1757.19	67580	4.688	0.213	0.75	0.905444
379	ARL13B_KAN583-12_2.tif:0009-0191	3.276	366.008	104	1110	138.274	30.837	0.49	1199.11	46117	3.658	0.273	0.75	0.61788
380	ARL13B_KAN583-12_2.tif:0010-0231	3.874	516.201	74	1846	109.392	37.374	0.429	1999.88	76914	5.198	0.192	0.835	1.0305
381	ARL13B_KAN583-12_2.tif:0011-0244	1.976	315.316	59	698	67.992	39.241	0.467	623.102	23964	2.603	0.384	0.652	0.321072
382	ARL13B_KAN583-12_2.tif:0012-0243	2.21	312.835	38	824	16.393	39.223	0.502	691.408	26591	4.31	0.232	0.837	0.356269
383	ARL13B_KAN583-12_2.tif:0013-0314	3.432	306.091	0	1247	127.11	50.817	0.256	1050.57	40404	2.286	0.437	0.441	0.541337
384	ARL13B_KAN583-12_2.tif:0014-0360	2.73	797.105	37	1997	6.809	57.728	0.409	2176.23	83696	3.429	0.292	0.619	1.12137
385	ARL13B_KAN583-12_2.tif:0015-0363	4.03	426.123	69	1102	86.804	58.418	0.48	1717.38	66049	4.03	0.248	0.852	0.884931
386	ARL13B_KAN583-12_2.tif:0016-0419	1.95	331.507	42	1007	60.24	67.801	0.393	646.477	24863	4.929	0.203	0.746	0.333117
387	ARL13B_KAN583-12_2.tif:0017-0475	1.586	342.361	74	678	221.762	76.518	0.324	543.017	20884	6.07	0.165	0.731	0.279806
388	ARL13B_KAN583-12_2.tif:0018-0483	1.3	372.8	66	782	26.884	78.003	0.539	484.669	18640	3.738	0.268	0.833	0.249741
389	ARL13B_KAN583-12_2.tif:0019-0537	2.678	314.262	66	835	187.835	86.695	0.512	841.645	32369	3.64	0.275	0.786	0.433683
390	ARL13B_KAN583-12_2.tif:0020-0538	3.588	415.971	122	1458	104.453	86.733	0.571	1492.59	57404	3.031	0.33	0.809	0.769105
391	ARL13B_KAN583-12_2.tif:0021-0554	1.898	266	100	591	4.428	89.442	0.521	504.898	19418	3.102	0.322	0.737	0.260164
392	ARL13B_KAN583-12_2.tif:0022-0656	2.678	362.806	24	782	73.935	105.782	0.361	971.653	37369	5.146	0.194	0.642	0.500674
393	ARL13B_KAN583-12_2.tif:0023-0659	2.912	650.884	109	2052	57.941	106.242	0.392	1895.49	72899	4.601	0.217	0.72	0.976708
394	ARL13B_KAN583-12_2.tif:0024-0679	2.47	227.232	93	471	218.17	109.267	0.451	561.296	21587	3.623	0.276	0.72	0.289225
395	ARL13B_KAN583-12_2.tif:0025-0682	3.302	671.835	72	2066	157.28	109.913	0.436	2218.53	85323	4.653	0.215	0.777	1.14317
396	ARL13B_KAN583-12_2.tif:0026-0753	2.522	769.227	53	2873	183.862	121.56	0.549	1940.11	74615	3.365	0.297	0.789	0.999699
397	ARL13B_KAN583-12_2.tif:0027-0770	1.872	221.792	122	436	92.622	124.111	0.555	415.219	15969	3.001	0.333	0.783	0.213954
398	ARL13B_KAN583-12_2.tif:0028-0857	2.106	340.136	100	844	42.507	138.282	0.432	716.369	27551	4.097	0.244	0.698	0.369131
399	ARL13B_KAN583-12_2.tif:0029-0861	2.47	420.147	133	946	101.617	138.998	0.41	1037.83	39914	5.187	0.193	0.769	0.534772
400	ARL13B_KAN583-12_2.tif:0030-0930	0.962	293.649	169	575	189.026	150.039	0.43	282.507	10865	4.987	0.201	0.679	0.14557
401	ARL13B_KAN583-12_2.tif:0031-1014	1.768	750.015	143	2153	123.522	163.628	0.509	1326.11	51001	3.288	0.304	0.819	0.683317
402	ARL13B_KAN583-12_3.tif:0001-0066	2.002	267.597	95	485	43.04	10.409	0.32	535.762	20605	5.812	0.172	0.67	0.276068
403	ARL13B_KAN583-12_3.tif:0002-0144	2.262	585.207	60	1548	211.403	23.293	0.418	1323.82	50913	4.712	0.212	0.722	0.682138
404	ARL13B_KAN583-12_3.tif:0003-0160	3.068	594.407	136	1610	149.778	25.808	0.451	1823.75	70140	4.002	0.25	0.789	0.939743
405	ARL13B_KAN583-12_3.tif:0004-0195	3.276	616.595	90	2020	51.142	31.524	0.587	2020.09	77691	3.052	0.328	0.813	1.04091
406	ARL13B_KAN583-12_3.tif:0005-0312	2.366	395.791	154	979	176.692	50.412	0.43	936.498	36017	4.457	0.224	0.692	0.482559
407	ARL13B_KAN583-12_3.tif:0006-0453	3.77	828.752	123	2648	87.012	73.109	0.595	3124.58	120169	2.768	0.361	0.812	1.61004
408	ARL13B_KAN583-12_3.tif:0007-0464	3.822	1128.05	152	4282	138.466	74.919	0.535	4311.68	165824	3.36	0.298	0.784	2.22173
409	ARL13B_KAN583-12_3.tif:0008-0470	3.9	739.18	122	2343	182.206	75.852	0.411	2882.98	110877	4.895	0.204	0.704	1.48554
410	ARL13B_KAN583-12_3.tif:0009-0483	3.51	604.919	156	2016	16.041	77.846	0.426	2123.39	81664	4.564	0.219	0.763	1.09414
411	ARL13B_KAN583-12_3.tif:0010-0649	1.794	330.739	58	1033	187.514	104.753	0.368	593.382	22821	4.643	0.215	0.639	0.305758
412	ARL13B_KAN583-12_3.tif:0011-0660	4.03	1023.01	153	3360	71.902	106.448	0.544	4122.96	158566	3.27	0.306	0.795	2.12448
413	ARL13B_KAN583-12_3.tif:0012-0702	3.874	995.423	162	3438	125.336	113.197	0.463	3856.5	148318	3.342	0.299	0.701	1.98718
414	ARL13B_KAN583-12_3.tif:0013-0823	3.302	445.953	15	1410	161.29	132.825	0.439	1472.62	56636	4.117	0.243	0.692	0.758815
415	ARL13B_KAN583-12_3.tif:0014-0829	3.12	795.708	146	2992	23.151	133.725	0.514	2482.76	95485	4.046	0.247	0.822	1.27932
416	ARL13B_KAN583-12_3.tif:0015-0840	2.314	658.742	121	1619	222.689	135.436	0.47	1524.42	58628	3.911	0.256	0.718	0.785504
417	ARL13B_KAN583-12_3.tif:0016-0880	1.508	483.017	17	1289	197.351	141.842	0.517	728.434	28015	2.982	0.335	0.779	0.375348
418	ARL13B_KAN583-12_3.tif:0017-0876	1.482	201.825	80	306	66.824	141.307	0.472	299.122	11504	2.403	0.416	0.708	0.154132
419	ARL13B_KAN583-12_3.tif:0018-0932	1.742	539.925	146	1708	102.383	150.472	0.582	940.607	36175	2.842	0.352	0.766	0.484676
420	ARL13B_KAN583-12_3.tif:0019-0999	2.418	401.763	88	1294	119.033	161.214	0.494	971.523	37364	3.662	0.273	0.798	0.500607
421	ARL13B_KAN583-12_3.tif:0020-1016	1.456	214.393	152	350	30.963	163.741	0.474	312.175	12006	4.289	0.233	0.727	0.160858
422	ARL13B_KAN583-12_4.tif:0001-0006	3.198	482.78	101	1403	120.976	1.157	0.416	1544.03	59382	4.679	0.214	0.804	0.795606
423	ARL13B_KAN583-12_4.tif:0002-0039	2.08	390.163	45	943	220.779	6.44	0.503	811.587	31213	4.073	0.246	0.847	0.418195
424	ARL13B_KAN583-12_4.tif:0003-0101	2.808	292.972	121	781	185.687	16.307	0.529	822.716	31641	3.614	0.277	0.771	0.423929
425	ARL13B_KAN583-12_4.tif:0004-0105	2.834	510.817	95	1336	72.646	17.073	0.415	1447.74	55679	5.016	0.199	0.793	0.745993
426	ARL13B_KAN583-12_4.tif:0005-0217	2.652	627.676	140	2244	98.487	35.07	0.441	1664.7	64023	3.895	0.257	0.699	0.857787
427	ARL13B_KAN583-12_4.tif:0006-0273	2.756	627.736	60	1476	222.166	43.881	0.422	1730.14	66540	4.555	0.22	0.765	0.89151
428	ARL13B_KAN583-12_4.tif:0007-0296	3.172	661.566	129	1967	78.946	47.684	0.412	2098.61	80711	4.685	0.213	0.753	1.08137
429	ARL13B_KAN583-12_4.tif:0008-0322	2.34	433.233	96	971	5.884	52.062	0.416	1013.83	38991	4.725	0.212	0.887	0.522405
430	ARL13B_KAN583-12_4.tif:0009-0360	1.924	329.716	4	987	62.831	58.277	0.487	634.412	24399	3.117	0.321	0.664	0.3269
431	ARL13B_KAN583-12_4.tif:0010-0365	3.016	710.276	81	2535	98.11	58.997	0.521	2142.32	82392	2.726	0.367	0.712	1.1039
432	ARL13B_KAN583-12_4.tif:0011-0408	1.924	705.527	100	2885	149.313	65.855	0.587	1357.52	52209	2.655	0.377	0.744	0.699502
433	ARL13B_KAN583-12_4.tif:0012-0465	3.12	719.142	133	2073	21.444	75.116	0.418	2243.86	86297	4.415	0.226	0.769	1.15622
434	ARL13B_KAN583-12_4.tif:0013-0509	2.236	483.163	79	1207	95.552	82.024	0.378	1080.42	41552	3.812	0.262	0.677	0.556718
435	ARL13B_KAN583-12_4.tif:0014-0514	4.394	714.024	52	2140	194.62	83.022	0.346	3137.61	120670	5.126	0.195	0.667	1.61675
436	ARL13B_KAN583-12_4.tif:0015-0570	3.432	867.417	51	3506	209.022	92.024	0.528	2977.15	114499	3.509	0.285	0.793	1.53407
437	ARL13B_KAN583-12_4.tif:0016-0573	1.872	396.931	79	1054	217.786	92.502	0.526	743.099	28579	2.838	0.352	0.742	0.382904
438	ARL13B_KAN583-12_4.tif:0017-0593	3.224	641.669	94	2285	161.152	95.812	0.572	2068.87	79567	3.08	0.325	0.821	1.06605
439	ARL13B_KAN583-12_4.tif:0018-0624	2.834	734.037	153	2191	45.448	100.729	0.57	2080.39	80010	3.363	0.297	0.799	1.07198
440	ARL13B_KAN583-12_4.tif:0019-0644	3.224	702.992	62	2202	76.98	103.997	0.429	2266.58	87171	4.32	0.231	0.77	1.16793
441	ARL13B_KAN583-12_4.tif:0020-0667	3.64	834.429	24	2161	141.837	107.792	0.44	3037.5	116820	4.26	0.235	0.767	1.56517
442	ARL13B_KAN583-12_4.tif:0021-0705	4.03	797.187	157	2297	175.018	113.728	0.592	3212.86	123564	3.039	0.329	0.873	1.65552
443	ARL13B_KAN583-12_4.tif:0022-0710	2.99	541.539	49	1420	13.617	114.422	0.316	1619.3	62277	4.514	0.222	0.617	0.834394
444	ARL13B_KAN583-12_4.tif:0023-0756	3.38	700.385	79	1743	170.631	121.957	0.469	2367.44	91050	4.304	0.232	0.793	1.2199
445	ARL13B_KAN583-12_4.tif:0024-0802	3.016	829.155	150	2903	121.676	129.179	0.584	2500.88	96182	2.997	0.334	0.808	1.28866
446	ARL13B_KAN583-12_4.tif:0025-0812	3.276	763.929	67	2218	101.428	131.063	0.425	2502.78	96255	4.321	0.231	0.714	1.28963
447	ARL13B_KAN583-12_4.tif:0026-0838	2.496	687.729	145	2312	215.153	135.217	0.569	1716.67	66022	3.031	0.33	0.835	0.88457
448	ARL13B_KAN583-12_4.tif:0027-0894	2.054	552.987	85	1533	188.131	144.144	0.416	1135.9	43686	3.086	0.324	0.705	0.58531
449	ARL13B_KAN583-12_4.tif:0028-0900	2.08	536.925	132	1421	162.901	145.24	0.386	1116.87	42954	4.913	0.204	0.669	0.575502
450	ARL13B_KAN583-12_4.tif:0029-0967	1.95	464.853	140	1342	109.668	155.984	0.564	906.519	34864	3.406	0.294	0.794	0.467111
451	ARL13B_KAN583-12_4.tif:0030-0988	2.678	440.379	85	1193	35.427	159.466	0.343	1179.4	45359	3.395	0.295	0.602	0.607725
452	ARL13B_KAN583-12_4.tif:0031-1031	0.598	287.522	153	614	5.605	166.182	0.423	171.948	6613	3.743	0.267	0.697	0.0886017
453	ARL13B_KAN583-12_5.tif:0001-0025	3.458	196.609	130	298	54.25	3.487	0.159	679.915	26149	10.698	0.093	0.613	0.350347
454	ARL13B_KAN583-12_5.tif:0002-0015	3.926	515.57	125	1103	64.456	2.389	0.516	2024.25	77851	3.76	0.266	0.878	1.04306
455	ARL13B_KAN583-12_5.tif:0003-0041	3.016	358.569	71	1019	125.391	6.742	0.486	1081.51	41594	3.644	0.274	0.712	0.557281
456	ARL13B_KAN583-12_5.tif:0004-0071	3.432	898.561	136	2738	217.696	11.419	0.494	3084.05	118610	3.338	0.3	0.746	1.58915
457	ARL13B_KAN583-12_5.tif:0005-0092	2.782	230.467	112	382	78.435	14.944	0.532	641.199	24660	3.129	0.32	0.759	0.330397
458	ARL13B_KAN583-12_5.tif:0006-0152	4.212	508.642	150	1171	47.316	24.478	0.528	2142.53	82400	3.653	0.274	0.82	1.104
459	ARL13B_KAN583-12_5.tif:0007-0172	3.744	549.59	110	1509	177.353	27.753	0.533	2057.79	79141	3.611	0.277	0.85	1.06034
460	ARL13B_KAN583-12_5.tif:0008-0376	3.016	279.621	7	785	204.758	60.41	0.501	843.387	32436	2.836	0.353	0.707	0.434581
461	ARL13B_KAN583-12_5.tif:0009-0399	2.366	403.747	91	1191	63.714	64.442	0.59	955.324	36741	3.21	0.312	0.879	0.49226
462	ARL13B_KAN583-12_5.tif:0010-0435	2.106	288.494	155	537	18.873	70.113	0.542	607.605	23368	3.35	0.298	0.775	0.313087
463	ARL13B_KAN583-12_5.tif:0011-0453	3.068	519.407	115	1349	74.746	73.161	0.553	1593.64	61290	3.838	0.261	0.877	0.82117
464	ARL13B_KAN583-12_5.tif:0012-0449	2.912	378.562	117	1159	138.864	72.351	0.544	1102.44	42399	2.761	0.362	0.767	0.568066
465	ARL13B_KAN583-12_5.tif:0013-0502	1.95	270.92	87	558	123.751	80.843	0.435	528.326	20319	4.105	0.244	0.718	0.272236
466	ARL13B_KAN583-12_5.tif:0014-0510	2.574	406.404	99	1226	169.879	82.256	0.539	1046.15	40234	3.184	0.314	0.764	0.539059
467	ARL13B_KAN583-12_5.tif:0015-0667	2.756	530.453	135	1464	222.554	107.609	0.498	1462.02	56228	3.538	0.283	0.788	0.753349
468	ARL13B_KAN583-12_5.tif:0016-0674	2.73	426.352	105	1174	54.414	108.597	0.483	1164.01	44767	3.284	0.305	0.761	0.599793
469	ARL13B_KAN583-12_5.tif:0017-0679	1.378	382.245	129	719	63.93	109.472	0.475	526.766	20259	3.188	0.314	0.671	0.271432
470	ARL13B_KAN583-12_5.tif:0018-0728	4.056	401.301	118	1387	33.875	117.399	0.543	1627.78	62603	3.505	0.285	0.794	0.838761
471	ARL13B_KAN583-12_5.tif:0019-0736	4.004	481.312	94	1562	75.833	118.746	0.381	1927.29	74122	5.549	0.18	0.725	0.993094
472	ARL13B_KAN583-12_5.tif:0020-0818	3.77	530.614	154	1497	106.162	132.015	0.523	2000.53	76939	3.564	0.281	0.784	1.03084
473	ARL13B_KAN583-12_5.tif:0021-0824	1.638	346.587	152	908	70.429	132.697	0.509	567.744	21835	3.01	0.332	0.681	0.292548
474	ARL13B_KAN583-12_5.tif:0022-0846	1.144	247.568	92	630	17.716	136.315	0.477	283.235	10893	3.144	0.318	0.672	0.145946
475	ARL13B_KAN583-12_5.tif:0023-0868	2.808	378.046	126	1142	214.488	139.831	0.334	1061.62	40829	5.253	0.19	0.657	0.547031
476	ARL13B_KAN583-12_5.tif:0024-0893	2.444	345.468	150	843	133.268	143.983	0.406	844.375	32474	4.611	0.217	0.694	0.43509
477	ARL13B_KAN583-12_5.tif:0025-0924	4.16	675.419	41	2604	183.635	149.216	0.425	2809.91	108067	3.559	0.281	0.708	1.44789
478	ARL13B_KAN583-12_5.tif:0026-1002	2.886	700.874	31	2124	198.95	161.788	0.478	2022.84	77797	3.682	0.272	0.725	1.04233
479	ARL13B_KAN583-12_5.tif:0027-1030	1.82	435.214	111	1065	12.241	166.223	0.518	792.138	30465	2.6	0.385	0.704	0.408173
480	ARL13B_KAN583-12_6.tif:0001-0044	3.562	693.073	26	2061	168.477	7.166	0.56	2468.88	94951	3.374	0.296	0.854	1.27216
481	ARL13B_KAN583-12_6.tif:0002-0083	4.654	328.229	6	877	73.738	13.396	0.388	1527.67	58753	4.298	0.233	0.681	0.787179
482	ARL13B_KAN583-12_6.tif:0003-0146	3.25	569.84	148	1500	165.13	23.773	0.577	1852.09	71230	2.865	0.349	0.847	0.954347
483	ARL13B_KAN583-12_6.tif:0004-0144	1.794	359.319	125	1016	218.626	23.254	0.513	644.657	24793	3.686	0.271	0.767	0.332179
484	ARL13B_KAN583-12_6.tif:0005-0203	2.002	384.221	59	1293	70.296	32.81	0.518	769.256	29585	2.751	0.363	0.703	0.396383
485	ARL13B_KAN583-12_6.tif:0006-0240	1.69	263.862	112	509	56.017	38.721	0.293	445.953	17151	4.808	0.208	0.563	0.229791
486	ARL13B_KAN583-12_6.tif:0007-0302	2.288	388.375	7	1247	194.284	48.736	0.564	888.656	34177	2.257	0.443	0.73	0.457907
487	ARL13B_KAN583-12_6.tif:0008-0317	3.12	683.325	153	2156	147.767	51.142	0.468	2132.1	81999	4.151	0.241	0.782	1.09863
488	ARL13B_KAN583-12_6.tif:0009-0321	2.392	426.935	84	1288	38.39	51.898	0.532	1021.29	39278	3.35	0.298	0.767	0.526251
489	ARL13B_KAN583-12_6.tif:0010-0335	4.082	400.796	153	787	63.353	54.12	0.51	1636.15	62925	3.858	0.259	0.831	0.843076
490	ARL13B_KAN583-12_6.tif:0011-0341	3.588	675.587	93	2059	83.561	54.972	0.43	2424.15	93231	4.79	0.209	0.795	1.24912
491	ARL13B_KAN583-12_6.tif:0012-0429	1.95	549.547	146	1438	222.382	69.07	0.478	1071.68	41216	4.262	0.235	0.838	0.552216
492	ARL13B_KAN583-12_6.tif:0013-0460	0.468	182.111	88	233	40.949	74.283	0.461	85.233	3278	2.406	0.416	0.632	0.043919
493	ARL13B_KAN583-12_6.tif:0014-0474	4.056	325.404	146	543	114.935	76.376	0.558	1319.92	50763	3.486	0.287	0.839	0.680128
494	ARL13B_KAN583-12_6.tif:0015-0484	2.366	461.615	48	1340	54.75	78.175	0.491	1092.25	42007	2.957	0.338	0.684	0.562814
495	ARL13B_KAN583-12_6.tif:0016-0523	3.718	868.895	81	2964	152.524	84.032	0.494	3230.75	124252	2.448	0.409	0.684	1.66474
496	ARL13B_KAN583-12_6.tif:0017-0526	3.094	1027.54	53	3103	193.894	85.187	0.445	3179.39	122277	3.129	0.32	0.708	1.63828
497	ARL13B_KAN583-12_6.tif:0018-0567	3.9	706.5	121	2253	180.803	91.341	0.374	2755.52	105975	4.631	0.216	0.658	1.41986
498	ARL13B_KAN583-12_6.tif:0019-0662	1.534	405.356	81	1206	9.242	106.828	0.503	621.853	23916	3.709	0.27	0.724	0.320429
499	ARL13B_KAN583-12_6.tif:0020-0677	3.042	708.632	53	2179	150.956	109.141	0.519	2155.79	82910	3.519	0.284	0.788	1.11084
500	ARL13B_KAN583-12_6.tif:0021-0748	3.38	237.931	77	393	78.931	120.846	0.511	804.254	30931	2.97	0.337	0.772	0.414417
501	ARL13B_KAN583-12_6.tif:0022-0759	3.25	619.776	151	2248	139.81	122.415	0.582	2014.39	77472	2.863	0.349	0.814	1.03798
502	ARL13B_KAN583-12_6.tif:0023-0853	3.328	645.344	152	2143	120.961	137.487	0.525	2147.83	82604	3.238	0.309	0.773	1.10674
503	ARL13B_KAN583-12_6.tif:0024-0899	3.12	537.733	118	2039	155.184	144.893	0.514	1677.83	64528	3.537	0.283	0.767	0.864553
504	ARL13B_KAN583-12_6.tif:0025-0904	2.6	304.8	138	803	56.849	145.796	0.514	792.528	30480	3.186	0.314	0.769	0.408374
										60660.2				0.812732
505	ARL13B_KAN583-13_1.tif:0001-0064	4.342	421.425	115	1301	96.684	10.204	0.488	1829.94	70378	3.735	0.268	0.797	0.942932
506	ARL13B_KAN583-13_1.tif:0002-0087	2.522	478.546	59	1079	15.476	14.297	0.51	1206.97	46419	3.09	0.324	0.724	0.621927
507	ARL13B_KAN583-13_1.tif:0003-0221	2.6	985.06	6	2766	207.269	35.39	0.434	2561.31	98506	3.738	0.267	0.791	1.31979
508	ARL13B_KAN583-13_1.tif:0004-0264	2.184	211.476	131	314	17.563	42.608	0.464	461.892	17764	4.021	0.249	0.8	0.238004
509	ARL13B_KAN583-13_1.tif:0005-0434	3.978	1022.73	150	3835	144.764	69.919	0.535	4068.67	156478	3.447	0.29	0.834	2.09651
510	ARL13B_KAN583-13_1.tif:0006-0478	0.884	183.265	101	284	101.146	77.044	0.481	162.016	6231	1.94	0.516	0.648	0.0834836
511	ARL13B_KAN583-13_1.tif:0007-0541	4.238	653.147	65	1901	47.896	87.292	0.577	2768.2	106463	3.397	0.294	0.821	1.4264
512	ARL13B_KAN583-13_1.tif:0008-0601	3.744	728.722	126	2313	107.03	97.13	0.486	2728.5	104936	3.87	0.258	0.764	1.40594
513	ARL13B_KAN583-13_1.tif:0009-0614	3.276	1155.31	47	4123	165.421	98.968	0.574	3785.02	145569	2.733	0.366	0.764	1.95035
514	ARL13B_KAN583-13_1.tif:0010-0622	1.118	168	84	294	14.646	100.524	0.427	187.835	7224	4.619	0.217	0.741	0.0967879
515	ARL13B_KAN583-13_1.tif:0011-0629	2.652	994.245	154	2878	199.101	101.377	0.575	2636.9	101413	3.193	0.313	0.854	1.35874
516	ARL13B_KAN583-13_1.tif:0012-0640	2.86	419.718	133	1032	213.186	103.454	0.374	1200.47	46169	4.2	0.238	0.632	0.618577
517	ARL13B_KAN583-13_1.tif:0013-0718	5.018	581.083	151	1455	125.934	115.653	0.525	2916.05	112149	3.635	0.275	0.798	1.50258
518	ARL13B_KAN583-13_1.tif:0014-0876	3.302	382.055	150	687	175.869	141.475	0.416	1261.62	48521	4.582	0.218	0.73	0.650089
519	ARL13B_KAN583-13_1.tif:0015-0894	4.29	832.291	134	2546	155.143	144.307	0.429	3570.74	137328	4.349	0.23	0.738	1.83993
520	ARL13B_KAN583-13_1.tif:0016-0899	3.38	592.8	92	1642	48.612	145.072	0.569	2003.79	77064	3.028	0.33	0.756	1.03251
521	ARL13B_KAN583-13_1.tif:0017-0936	3.51	538.778	92	1471	89.191	151.137	0.349	1891.22	72735	4.225	0.237	0.624	0.974511
522	ARL13B_KAN583-13_1.tif:0018-1005	2.678	730.505	151	1830	60.922	162.059	0.404	1956.41	75242	5.58	0.179	0.795	1.0081
523	ARL13B_KAN583-13_1.tif:0019-1024	1.898	234.027	127	415	209.84	165.033	0.525	444.211	17084	3.059	0.327	0.777	0.228893
524	ARL13B_KAN583-13_2.tif:0001-0025	3.068	215.034	109	437	21.504	3.916	0.393	659.764	25374	4.493	0.223	0.742	0.339963
525	ARL13B_KAN583-13_2.tif:0002-0092	1.69	140.908	8	260	124.7	15.047	0.295	238.148	9159	3.782	0.264	0.524	0.122713
526	ARL13B_KAN583-13_2.tif:0003-0095	1.69	86.169	0	206	121.564	15.134	0.419	145.635	5601	1.346	0.743	0.602	0.0750428
527	ARL13B_KAN583-13_2.tif:0004-0120	6.032	405.616	47	1669	127.292	19.182	0.341	2446.82	94103	5.24	0.191	0.767	1.2608
528	ARL13B_KAN583-13_2.tif:0005-0129	0.702	133.704	39	223	122.637	20.936	0.317	93.866	3610	2.144	0.466	0.474	0.0483672
529	ARL13B_KAN583-13_2.tif:0006-0160	3.25	98.224	0	302	128.993	25.668	0.2	319.247	12278	3.482	0.287	0.43	0.164502
530	ARL13B_KAN583-13_2.tif:0007-0198	3.978	1099.85	122	3683	101.713	31.989	0.538	4375.47	168277	3.548	0.282	0.884	2.25459
531	ARL13B_KAN583-13_2.tif:0008-0205	0.468	137.778	67	212	148.708	33.119	0.509	64.484	2480	3.078	0.325	0.72	0.0332273
532	ARL13B_KAN583-13_2.tif:0009-0222	5.044	771.314	0	2687	92.856	35.659	0.449	3890.74	149635	3.299	0.303	0.759	2.00483
533	ARL13B_KAN583-13_2.tif:0010-0222	0.442	171.765	33	308	148.421	35.935	0.539	75.925	2920	2.069	0.483	0.694	0.0391225
534	ARL13B_KAN583-13_2.tif:0011-0312	0.91	89.8	0	219	149.698	50.427	0.326	81.723	3143	1.558	0.642	0.526	0.0421102
535	ARL13B_KAN583-13_2.tif:0012-0315	0.858	160.424	43	324	130.859	51.163	0.511	137.652	5294	1.991	0.502	0.75	0.0709296
536	ARL13B_KAN583-13_2.tif:0013-0347	3.51	659.17	89	2201	200.781	55.85	0.365	2313.83	88988	5.023	0.199	0.692	1.19227
537	ARL13B_KAN583-13_2.tif:0014-0350	0.572	100.818	0	176	128.956	56.621	0.509	57.671	2218	2.025	0.494	0.688	0.029717
538	ARL13B_KAN583-13_2.tif:0015-0370	3.614	829.878	152	3525	184.923	59.879	0.506	2999.36	115353	3.643	0.274	0.755	1.54551
539	ARL13B_KAN583-13_2.tif:0016-0397	4.992	647.151	5	1998	78.756	63.895	0.406	3230.77	124253	3.186	0.314	0.671	1.66475
540	ARL13B_KAN583-13_2.tif:0017-0395	2.964	1074.66	28	3688	217.744	63.804	0.586	3185.48	122511	2.289	0.437	0.752	1.64142
541	ARL13B_KAN583-13_2.tif:0018-0410	4.758	714.705	78	3770	135.472	66.277	0.349	3400.77	130791	5.104	0.196	0.655	1.75235
542	ARL13B_KAN583-13_2.tif:0019-0421	5.486	921.701	0	4280	156.547	67.899	0.464	5056.76	194479	2.454	0.408	0.691	2.60565
543	ARL13B_KAN583-13_2.tif:0020-0448	0.286	111.182	45	172	154.925	72.321	0.247	31.8	1223	7.943	0.126	0.667	0.0163859
544	ARL13B_KAN583-13_2.tif:0021-0459	2.938	447.496	84	1377	90.937	73.962	0.386	1314.82	50567	4.975	0.201	0.736	0.677502
545	ARL13B_KAN583-13_2.tif:0022-0453	4.472	716.547	132	2344	69.724	73.265	0.549	3204.59	123246	3.132	0.319	0.854	1.65126
546	ARL13B_KAN583-13_2.tif:0023-0485	0.442	144.765	68	228	155.355	78.107	0.573	63.99	2461	2.435	0.411	0.739	0.0329727
547	ARL13B_KAN583-13_2.tif:0024-0497	0.364	106.857	35	192	86.084	80.038	0.348	38.898	1496	1.776	0.563	0.519	0.0200436
548	ARL13B_KAN583-13_2.tif:0025-0502	0.26	126.1	0	259	131.048	81.044	0.403	32.788	1261	5.365	0.186	0.769	0.016895
549	ARL13B_KAN583-13_2.tif:0026-0519	0.286	90.182	14	181	130.913	83.945	0.311	25.794	992	1.362	0.734	0.478	0.0132909
550	ARL13B_KAN583-13_2.tif:0027-0538	4.654	1188.51	0	5073	127.062	86.759	0.527	5531.68	212744	2.192	0.456	0.765	2.85037
551	ARL13B_KAN583-13_2.tif:0028-0590	1.248	154.438	50	238	154.558	95.245	0.232	192.75	7413	5.928	0.169	0.608	0.0993201
552	ARL13B_KAN583-13_2.tif:0029-0607	2.288	316.273	5	861	117.764	97.549	0.345	723.676	27832	1.412	0.708	0.542	0.372896
553	ARL13B_KAN583-13_2.tif:0030-0625	3.77	896.221	68	2737	203.627	100.654	0.457	3378.95	129952	3.276	0.305	0.684	1.74111
554	ARL13B_KAN583-13_2.tif:0031-0721	3.952	878.901	122	2627	194.657	116.12	0.556	3473.63	133593	3.02	0.331	0.861	1.78989
555	ARL13B_KAN583-13_2.tif:0032-0834	8.893	325.974	64	880	127.519	134.524	0.289	2898.73	111483	7.71	0.13	0.74	1.49366
556	ARL13B_KAN583-13_2.tif:0033-0854	4.316	545.867	69	1718	27.169	137.602	0.417	2356.11	90614	3.937	0.254	0.711	1.21406
557	ARL13B_KAN583-13_2.tif:0034-0850	3.458	930.008	151	3148	171.122	137.189	0.51	3216.16	123691	3.789	0.264	0.806	1.65722
558	ARL13B_KAN583-13_2.tif:0035-0881	3.796	1002.62	124	3499	160.998	142.241	0.439	3806.19	146383	4.353	0.23	0.851	1.96125
559	ARL13B_KAN583-13_2.tif:0036-0900	4.732	598.132	91	1918	89.73	145.154	0.355	2830.53	108860	5.954	0.168	0.771	1.45852
560	ARL13B_KAN583-13_2.tif:0037-0995	2.574	513.768	26	1679	111.037	160.456	0.539	1322.52	50863	3.044	0.328	0.805	0.681468
561	ARL13B_KAN583-13_3.tif:0001-0194	5.512	766.783	56	2405	103.342	31.514	0.55	4226.76	162558	3.226	0.31	0.871	2.17797
562	ARL13B_KAN583-13_3.tif:0002-0204	4.446	237.673	113	414	41.098	32.957	0.375	1056.76	40642	4.831	0.207	0.753	0.544526
563	ARL13B_KAN583-13_3.tif:0003-0228	2.028	870.692	53	3532	102.373	36.906	0.44	1765.87	67914	4.311	0.232	0.796	0.909919
564	ARL13B_KAN583-13_3.tif:0004-0244	4.524	713.868	74	2292	141.775	39.276	0.45	3229.73	124213	3.937	0.254	0.8	1.66422
565	ARL13B_KAN583-13_3.tif:0005-0270	3.12	1048.68	53	3399	189.383	43.454	0.496	3272.09	125842	3.72	0.269	0.816	1.68604
566	ARL13B_KAN583-13_3.tif:0006-0315	4.368	408.256	138	1802	77.18	50.791	0.397	1783.37	68587	4.85	0.206	0.715	0.918936
567	ARL13B_KAN583-13_3.tif:0007-0322	0.442	136.235	49	185	115.479	51.842	0.393	60.22	2316	3.343	0.299	0.607	0.03103
568	ARL13B_KAN583-13_3.tif:0008-0342	4.888	836.271	95	3137	111.113	55.133	0.578	4087.94	157219	3.056	0.327	0.832	2.10644
569	ARL13B_KAN583-13_3.tif:0009-0368	0.832	70.281	0	282	110.33	59.481	0.599	58.478	2249	2.202	0.454	0.78	0.0301323
570	ARL13B_KAN583-13_3.tif:0010-0368	0.286	146.909	67	201	163.119	59.435	0.349	42.019	1616	5.259	0.19	0.595	0.0216513
571	ARL13B_KAN583-13_3.tif:0011-0387	0.546	100.19	25	219	143.109	62.438	0.412	54.707	2104	2.896	0.345	0.609	0.0281896
572	ARL13B_KAN583-13_3.tif:0012-0402	0.26	168.3	82	222	161.879	64.903	0.497	43.761	1683	2.452	0.408	0.625	0.022549
573	ARL13B_KAN583-13_3.tif:0013-0435	4.056	711.628	0	2881	137.432	70.251	0.437	2886.54	111014	3.632	0.275	0.721	1.48738
574	ARL13B_KAN583-13_3.tif:0014-0440	3.952	317.691	71	787	68.873	70.863	0.411	1255.59	48289	4.278	0.234	0.696	0.646981
575	ARL13B_KAN583-13_3.tif:0015-0470	0.442	106.882	0	275	144.248	75.878	0.23	47.245	1817	7.507	0.133	0.493	0.0243444
576	ARL13B_KAN583-13_3.tif:0016-0503	5.2	676.995	0	3776	157.226	80.927	0.334	3520.59	135399	3.475	0.288	0.55	1.81409
577	ARL13B_KAN583-13_3.tif:0017-0500	3.25	467.76	75	1201	215.014	80.667	0.562	1520.31	58470	2.595	0.385	0.806	0.783387
578	ARL13B_KAN583-13_3.tif:0018-0544	2.704	283.577	1	1349	9.872	87.841	0.337	766.838	29492	5.9	0.169	0.673	0.395137
579	ARL13B_KAN583-13_3.tif:0019-0577	4.186	1103.96	0	4931	151.986	93.517	0.456	4621.47	177738	2.896	0.345	0.703	2.38135
580	ARL13B_KAN583-13_3.tif:0020-0572	0.26	116.2	7	195	132.322	92.316	0.368	30.214	1162	4.529	0.221	0.588	0.0155686
581	ARL13B_KAN583-13_3.tif:0021-0590	4.498	611.145	136	1788	63.585	95.258	0.5	2749.09	105728	3.78	0.265	0.832	1.41655
582	ARL13B_KAN583-13_3.tif:0022-0625	3.64	1294.3	67	4983	153.221	100.741	0.447	4711.54	181202	4.011	0.249	0.778	2.42776
583	ARL13B_KAN583-13_3.tif:0023-0696	3.12	339.117	0	1492	132.725	112.234	0.389	1058.11	40694	2.856	0.35	0.62	0.545222
584	ARL13B_KAN583-13_3.tif:0024-0696	3.224	597.589	30	2473	99.104	112.357	0.421	1926.74	74101	1.898	0.527	0.641	0.992813
585	ARL13B_KAN583-13_3.tif:0025-0695	0.416	81.438	0	180	123.205	112.361	0.225	33.88	1303	1.469	0.681	0.364	0.0174577
586	ARL13B_KAN583-13_3.tif:0026-0717	4.29	578.83	0	2168	136.483	115.394	0.371	2483.33	95507	2.22	0.45	0.607	1.27961
587	ARL13B_KAN583-13_3.tif:0027-0713	0.416	109.625	0	187	62.424	115.213	0.398	45.607	1754	1.997	0.501	0.571	0.0235003
588	ARL13B_KAN583-13_3.tif:0028-0731	4.29	593.594	77	2902	70.861	117.648	0.26	2546.67	97943	5.206	0.192	0.563	1.31225
589	ARL13B_KAN583-13_3.tif:0029-0722	0.364	99.857	6	182	131.269	116.376	0.24	36.35	1398	2.448	0.408	0.412	0.0187305
590	ARL13B_KAN583-13_3.tif:0030-0727	1.508	256.879	150	391	212.466	117.087	0.322	387.397	14899	5.489	0.182	0.627	0.199618
591	ARL13B_KAN583-13_3.tif:0031-0776	5.772	562.338	47	1750	164.694	124.954	0.481	3246.01	124839	2.875	0.348	0.73	1.67261
592	ARL13B_KAN583-13_3.tif:0032-0827	3.51	1336.36	94	4710	131.497	133.385	0.518	4690.92	180409	3.907	0.256	0.852	2.41714
593	ARL13B_KAN583-13_3.tif:0033-0895	2.782	728.318	109	2640	38.656	144.377	0.412	2026.3	77930	3.33	0.3	0.652	1.04411
594	ARL13B_KAN583-13_3.tif:0034-0901	2.834	777.743	78	2536	111.281	145.12	0.588	2204.26	84774	2.89	0.346	0.804	1.13581
595	ARL13B_KAN583-13_3.tif:0035-0935	3.354	800.457	2	3324	81.047	150.603	0.434	2684.9	103259	3.511	0.285	0.679	1.38347
596	ARL13B_KAN583-13_3.tif:0036-1017	1.768	346.779	153	822	93.57	164.098	0.542	613.143	23581	3.132	0.319	0.735	0.315941
597	ARL13B_KAN583-13_4.tif:0001-0030	3.874	391.94	115	861	22.647	4.749	0.574	1518.46	58399	3.037	0.329	0.816	0.782436
598	ARL13B_KAN583-13_4.tif:0002-0047	3.562	717.029	62	2740	185.799	7.596	0.595	2554.21	98233	3.373	0.296	0.89	1.31614
599	ARL13B_KAN583-13_4.tif:0003-0066	3.848	665.784	148	2078	130.309	10.628	0.577	2562.09	98536	3.159	0.317	0.855	1.3202
600	ARL13B_KAN583-13_4.tif:0004-0126	4.758	855.53	154	2280	135.62	20.418	0.493	4070.86	156562	3.742	0.267	0.794	2.09763
601	ARL13B_KAN583-13_4.tif:0005-0200	0.806	152.419	90	235	5.001	32.242	0.522	122.857	4725	3.709	0.27	0.805	0.063306
602	ARL13B_KAN583-13_4.tif:0006-0213	4.16	316.462	0	687	61.172	34.29	0.492	1316.56	50634	3.128	0.32	0.767	0.6784
603	ARL13B_KAN583-13_4.tif:0007-0226	3.822	766.408	81	2823	212.538	36.58	0.458	2929.39	112662	4.255	0.235	0.754	1.50946
604	ARL13B_KAN583-13_4.tif:0008-0257	2.808	1050.38	84	3483	191.422	41.461	0.522	2949.64	113441	3.426	0.292	0.75	1.51989
605	ARL13B_KAN583-13_4.tif:0009-0353	0.572	88.773	2	215	118.248	57.229	0.297	50.781	1953	1.886	0.53	0.5	0.0261665
606	ARL13B_KAN583-13_4.tif:0010-0382	5.382	639.478	0	2575	123.84	61.66	0.487	3441.88	132372	3.899	0.256	0.831	1.77353
607	ARL13B_KAN583-13_4.tif:0011-0369	0.26	132.5	49	189	142.755	59.534	0.346	34.452	1325	6.024	0.166	0.714	0.0177525
608	ARL13B_KAN583-13_4.tif:0012-0406	4.628	1327.26	114	5034	137.16	65.59	0.539	6142.95	236253	3.259	0.307	0.834	3.16534
609	ARL13B_KAN583-13_4.tif:0013-0532	3.822	758.524	151	4422	21.091	85.961	0.573	2899.25	111503	3.364	0.297	0.831	1.49393
610	ARL13B_KAN583-13_4.tif:0014-0541	4.888	671.787	102	1863	85.323	87.263	0.543	3283.89	126296	3.18	0.314	0.823	1.69213
611	ARL13B_KAN583-13_4.tif:0015-0563	5.226	996.179	0	5427	113.648	91.172	0.41	5206.35	200232	3.29	0.304	0.681	2.68273
612	ARL13B_KAN583-13_4.tif:0016-0584	2.34	1084.03	68	5623	185.154	94.351	0.592	2536.79	97563	2.526	0.396	0.756	1.30716
613	ARL13B_KAN583-13_4.tif:0017-0631	6.162	595.81	125	1784	89.714	101.499	0.393	3671.6	141207	4.695	0.213	0.756	1.89191
614	ARL13B_KAN583-13_4.tif:0018-0670	4.446	954.216	0	4816	136.547	108.172	0.469	4242.7	163171	2.509	0.398	0.723	2.18618
615	ARL13B_KAN583-13_4.tif:0019-0718	5.252	694.599	0	2730	144.144	115.88	0.334	3648.25	140309	4.487	0.223	0.615	1.87987
616	ARL13B_KAN583-13_4.tif:0020-0736	0.546	158.143	7	266	141.366	118.722	0.32	86.351	3321	6.273	0.159	0.592	0.0444951
617	ARL13B_KAN583-13_4.tif:0021-0761	8.321	97.775	0	306	140.137	123.002	0.08	813.537	31288	1.552	0.644	0.313	0.4192
618	ARL13B_KAN583-13_4.tif:0022-0778	5.954	1105.28	150	3436	59.033	125.497	0.596	6581.26	253110	2.91	0.344	0.85	3.39119
619	ARL13B_KAN583-13_4.tif:0023-0783	0.676	102.923	0	196	137.156	126.389	0.284	69.58	2676	7.277	0.137	0.703	0.0358533
620	ARL13B_KAN583-13_4.tif:0024-0829	0.39	100.733	0	185	104.721	133.585	0.232	39.288	1511	2.393	0.418	0.395	0.0202445
621	ARL13B_KAN583-13_4.tif:0025-0864	5.044	408.381	146	1238	190.353	139.547	0.482	2060	79226	3.808	0.263	0.838	1.06148
622	ARL13B_KAN583-13_4.tif:0026-0868	4.472	863.163	14	3626	96.546	140.083	0.51	3860.3	148464	2.596	0.385	0.735	1.98914
623	ARL13B_KAN583-13_4.tif:0027-0891	2.652	782.824	62	2779	8.314	143.55	0.537	2076.17	79848	3.048	0.328	0.797	1.06981
624	ARL13B_KAN583-13_4.tif:0028-0924	5.226	384.791	122	1129	202.985	149.019	0.465	2011.04	77343	4.373	0.229	0.814	1.03625
625	ARL13B_KAN583-13_4.tif:0029-0995	2.782	1218.07	54	6519	38	160.264	0.583	3388.86	130333	2.733	0.366	0.801	1.74621
626	ARL13B_KAN583-13_4.tif:0030-1027	3.458	718.015	151	2198	111.926	165.729	0.587	2483.05	95496	2.881	0.347	0.745	1.27947
627	ARL13B_KAN583-13_5.tif:0001-0027	4.654	719.14	129	2506	155.553	4.726	0.491	3347.08	128726	2.999	0.333	0.713	1.72468
628	ARL13B_KAN583-13_5.tif:0002-0091	3.146	676.413	105	1952	209.971	14.933	0.564	2128.12	81846	2.187	0.457	0.729	1.09658
629	ARL13B_KAN583-13_5.tif:0003-0173	0.286	112.182	6	182	137.92	27.948	0.288	32.086	1234	6.122	0.163	0.579	0.0165333
630	ARL13B_KAN583-13_5.tif:0004-0235	4.888	1011.96	45	4428	140.89	37.979	0.532	4946.75	190248	3.584	0.279	0.879	2.54896
631	ARL13B_KAN583-13_5.tif:0005-0257	3.666	1253.82	144	7109	28.518	41.457	0.519	4596.79	176789	3.206	0.312	0.773	2.36864
632	ARL13B_KAN583-13_5.tif:0006-0317	0.26	113.7	50	182	156.106	51.149	0.346	29.564	1137	1.75	0.571	0.526	0.0152336
633	ARL13B_KAN583-13_5.tif:0007-0333	0.65	80.04	0	173	92.909	53.667	0.468	52.029	2001	2.547	0.393	0.617	0.0268096
634	ARL13B_KAN583-13_5.tif:0008-0358	3.536	377.515	156	843	8.444	57.63	0.476	1334.97	51342	3.165	0.316	0.751	0.687885
635	ARL13B_KAN583-13_5.tif:0009-0358	4.42	461.947	0	1476	157.782	58.234	0.211	2041.93	78531	5.667	0.176	0.47	1.05217
636	ARL13B_KAN583-13_5.tif:0010-0366	6.032	643.267	49	1883	96.349	59.17	0.366	3880.42	149238	4.995	0.2	0.733	1.99951
637	ARL13B_KAN583-13_5.tif:0011-0364	0.26	108.3	0	210	115.713	58.776	0.368	28.16	1083	4.529	0.221	0.588	0.0145101
638	ARL13B_KAN583-13_5.tif:0012-0376	3.614	903.597	79	2857	218.705	60.903	0.445	3265.8	125600	4.116	0.243	0.848	1.6828
639	ARL13B_KAN583-13_5.tif:0013-0382	4.16	645.469	57	3303	82.607	61.7	0.346	2685.31	103275	5.44	0.184	0.639	1.38369
640	ARL13B_KAN583-13_5.tif:0014-0407	3.406	1062.9	7	7131	55.27	66.157	0.34	3620.46	139240	2.26	0.442	0.552	1.86555
641	ARL13B_KAN583-13_5.tif:0015-0429	0.468	87.056	0	218	120.758	69.293	0.317	40.744	1567	2.589	0.386	0.493	0.0209948
642	ARL13B_KAN583-13_5.tif:0016-0456	3.64	976.336	152	3710	209.191	73.533	0.478	3554.08	136687	4.116	0.243	0.751	1.83135
643	ARL13B_KAN583-13_5.tif:0017-0460	0.338	133.308	32	254	133.509	74.243	0.316	45.061	1733	3.051	0.328	0.473	0.0232189
644	ARL13B_KAN583-13_5.tif:0018-0479	4.602	452.102	2	1575	132.445	77.04	0.45	2080.7	80022	4.473	0.224	0.756	1.07214
645	ARL13B_KAN583-13_5.tif:0019-0499	0.26	171.3	91	231	69.144	80.544	0.497	44.541	1713	1.733	0.577	0.588	0.022951
646	ARL13B_KAN583-13_5.tif:0020-0514	2.938	650.372	151	1761	93.447	82.946	0.581	1910.91	73492	3.034	0.33	0.796	0.984653
647	ARL13B_KAN583-13_5.tif:0021-0530	6.058	1340.53	0	6693	141.694	85.703	0.331	8121.43	312344	3.988	0.251	0.653	4.18482
648	ARL13B_KAN583-13_5.tif:0022-0529	3.744	334.41	52	958	70.359	85.44	0.26	1252.11	48155	7.65	0.131	0.629	0.645186
649	ARL13B_KAN583-13_5.tif:0023-0579	3.77	446.697	125	1072	4.315	93.252	0.563	1684.15	64771	3.207	0.312	0.831	0.867809
650	ARL13B_KAN583-13_5.tif:0024-0655	4.628	992.197	30	4515	92.308	105.867	0.42	4592.16	176611	3.136	0.319	0.702	2.36625
651	ARL13B_KAN583-13_5.tif:0025-0645	0.338	143.846	35	243	123.809	104.087	0.316	48.623	1870	5.388	0.186	0.52	0.0250545
652	ARL13B_KAN583-13_5.tif:0026-0666	4.264	1121.65	3	4248	26.16	107.597	0.486	4783.01	183951	2.514	0.398	0.74	2.46459
653	ARL13B_KAN583-13_5.tif:0027-0670	3.458	481.632	150	1285	207.931	108.174	0.349	1665.58	64057	6.514	0.154	0.762	0.858242
654	ARL13B_KAN583-13_5.tif:0028-0730	0.26	171.5	70	329	140.787	117.696	0.536	44.593	1715	3.006	0.333	0.625	0.0229777
655	ARL13B_KAN583-13_5.tif:0029-0754	0.26	142.8	55	187	114.488	121.502	0.346	37.13	1428	2	0.5	0.5	0.0191325
656	ARL13B_KAN583-13_5.tif:0030-0788	4.992	935.714	66	2981	78.566	126.917	0.405	4671.36	179657	4.99	0.2	0.865	2.40706
657	ARL13B_KAN583-13_5.tif:0031-0836	3.432	821.136	69	2387	33.946	134.961	0.58	2818.31	108390	2.886	0.346	0.841	1.45222
658	ARL13B_KAN583-13_5.tif:0032-0940	3.978	821.203	66	2659	30.854	151.769	0.42	3266.94	125644	4.943	0.202	0.825	1.68339
659	ARL13B_KAN583-13_5.tif:0033-0950	3.77	654.421	120	2174	180.454	153.353	0.431	2467.32	94891	4.25	0.235	0.797	1.27136
660	ARL13B_KAN583-13_5.tif:0034-0986	2.418	852.763	101	3018	84.472	159.012	0.408	2062.11	79307	6.072	0.165	0.753	1.06256
661	ARL13B_KAN583-13_5.tif:0035-0988	1.768	203.074	85	351	211.076	159.218	0.549	359.056	13809	1.972	0.507	0.723	0.185014
662	ARL13B_KAN583-13_6.tif:0001-0017	3.744	387.493	151	805	36.738	2.752	0.566	1450.86	55799	3.218	0.311	0.847	0.747601
663	ARL13B_KAN583-13_6.tif:0002-0044	4.524	735.764	0	2651	197.935	7.485	0.332	3328.8	128023	3.343	0.299	0.545	1.71527
664	ARL13B_KAN583-13_6.tif:0003-0051	4.498	1092.82	131	4678	141.031	8.426	0.598	4915.78	189057	2.305	0.434	0.774	2.53301
665	ARL13B_KAN583-13_6.tif:0004-0053	0.754	145.517	90	198	81.529	8.532	0.267	109.727	4220	6.282	0.159	0.532	0.05654
666	ARL13B_KAN583-13_6.tif:0005-0055	3.068	188.542	52	404	95.455	8.897	0.332	578.483	22248	5.133	0.195	0.624	0.298081
667	ARL13B_KAN583-13_6.tif:0006-0084	2.808	487.944	40	1518	174.107	13.614	0.542	1370.23	52698	3.302	0.303	0.788	0.706053
668	ARL13B_KAN583-13_6.tif:0007-0094	2.158	127.964	17	226	82.351	15.421	0.242	276.163	10621	2.996	0.334	0.459	0.142301
669	ARL13B_KAN583-13_6.tif:0008-0105	3.38	286.792	99	593	33.291	16.744	0.433	969.416	37283	4.265	0.234	0.781	0.499521
670	ARL13B_KAN583-13_6.tif:0009-0180	5.252	495.144	154	1144	63.926	29.086	0.517	2600.65	100019	3.682	0.272	0.842	1.34006
671	ARL13B_KAN583-13_6.tif:0010-0198	4.81	1067.95	29	3329	213.98	32.003	0.533	5137.15	197571	3.734	0.268	0.869	2.64708
672	ARL13B_KAN583-13_6.tif:0011-0221	4.628	576.337	157	1283	187.03	35.651	0.52	2667.45	102588	3.752	0.267	0.86	1.37448
673	ARL13B_KAN583-13_6.tif:0012-0237	5.07	541.349	96	1303	43.655	38.326	0.558	2744.8	105563	3.094	0.323	0.846	1.41434
674	ARL13B_KAN583-13_6.tif:0013-0245	3.588	422.529	149	1185	94.03	39.714	0.427	1516.12	58309	3.775	0.265	0.708	0.78123
675	ARL13B_KAN583-13_6.tif:0014-0322	1.872	187.764	89	369	216.747	51.777	0.301	351.515	13519	5.613	0.178	0.643	0.181129
676	ARL13B_KAN583-13_6.tif:0015-0327	3.276	541.214	150	2264	47.062	52.587	0.563	1773.12	68193	3.053	0.328	0.797	0.913657
677	ARL13B_KAN583-13_6.tif:0016-0330	0.26	128.9	63	209	125.711	53.229	0.325	33.516	1289	6.958	0.144	0.714	0.0172702
678	ARL13B_KAN583-13_6.tif:0017-0356	4.368	432.089	114	981	30.622	57.349	0.482	1887.48	72591	3.225	0.31	0.824	0.972582
679	ARL13B_KAN583-13_6.tif:0018-0348	0.442	113.353	44	174	124.85	56.272	0.263	50.105	1927	1.381	0.724	0.42	0.0258181
680	ARL13B_KAN583-13_6.tif:0019-0376	3.718	1048.05	61	5540	75.66	60.485	0.516	3896.88	149871	3.291	0.304	0.747	2.00799
681	ARL13B_KAN583-13_6.tif:0020-0380	3.12	313.108	137	651	15.139	61.357	0.49	976.957	37573	3.874	0.258	0.828	0.503407
682	ARL13B_KAN583-13_6.tif:0021-0382	0.286	146.727	49	229	138.14	61.649	0.329	41.967	1614	4.415	0.226	0.512	0.0216245
683	ARL13B_KAN583-13_6.tif:0022-0402	0.806	107.323	14	231	130.912	65.096	0.139	86.507	3327	2.244	0.446	0.265	0.0445755
684	ARL13B_KAN583-13_6.tif:0023-0430	1.482	270.86	151	524	123.146	69.376	0.57	401.438	15439	2.748	0.364	0.792	0.206853
685	ARL13B_KAN583-13_6.tif:0024-0442	0.286	128.364	36	187	137.055	71.265	0.494	36.714	1412	2.264	0.442	0.564	0.0189181
686	ARL13B_KAN583-13_6.tif:0025-0492	4.706	1183.5	104	4168	40.934	79.167	0.473	5569.9	214214	3.468	0.288	0.733	2.87006
687	ARL13B_KAN583-13_6.tif:0026-0491	4.55	1094.27	154	4105	211.361	79.168	0.513	4979.25	191498	3.927	0.255	0.824	2.56571
688	ARL13B_KAN583-13_6.tif:0027-0594	3.692	525.063	19	1703	121.085	95.752	0.44	1938.65	74559	4.325	0.231	0.759	0.998949
689	ARL13B_KAN583-13_6.tif:0028-0636	1.95	423.467	137	1229	195.838	102.741	0.527	825.81	31760	2.905	0.344	0.761	0.425524
690	ARL13B_KAN583-13_6.tif:0029-0639	2.522	402.392	67	1316	109.069	103.096	0.575	1014.89	39032	2.58	0.388	0.738	0.522955
691	ARL13B_KAN583-13_6.tif:0030-0641	1.95	126.387	0	242	50.64	103.19	0.454	246.469	9479	1.398	0.715	0.628	0.127001
692	ARL13B_KAN583-13_6.tif:0031-0643	4.368	856.03	116	2864	77.249	103.386	0.475	3739.36	143813	3.042	0.329	0.706	1.92682
693	ARL13B_KAN583-13_6.tif:0032-0656	3.406	1202.04	151	4533	151.131	105.692	0.571	4094.39	157467	2.593	0.386	0.773	2.10976
694	ARL13B_KAN583-13_6.tif:0033-0654	0.442	195.059	14	533	194.159	105.481	0.573	86.221	3316	3.478	0.288	0.723	0.0444281
695	ARL13B_KAN583-13_6.tif:0034-0741	1.04	201.8	123	333	122.002	119.244	0.505	209.885	8072	2.637	0.379	0.741	0.108149
696	ARL13B_KAN583-13_6.tif:0035-0767	5.122	637.462	150	2205	46.481	123.705	0.559	3265.28	125580	3.517	0.284	0.826	1.68253
697	ARL13B_KAN583-13_6.tif:0036-0801	4.836	1237.76	73	3980	151.263	129.471	0.436	5986.18	230224	3.373	0.296	0.691	3.08456
698	ARL13B_KAN583-13_6.tif:0037-0812	3.848	607.088	13	2007	65.647	130.947	0.539	2336.22	89849	3.975	0.252	0.919	1.20381
699	ARL13B_KAN583-13_6.tif:0038-0868	2.964	308.947	150	754	33.823	139.903	0.304	915.775	35220	6.988	0.143	0.661	0.471881
700	ARL13B_KAN583-13_6.tif:0039-0946	4.134	761.044	133	2896	110.55	152.598	0.395	3146.34	121006	5.394	0.185	0.736	1.62125
										78563.3				1.0526

## Sheet: KAN602
	Label	Area	Mean	Min	Max	X	Y	Circ	IntDen	RawIntDen	AR	Round	Solidity						Label	Area	Mean	Min	Max	X	Y	Circ	IntDen	RawIntDen	AR	Round	Solidity
740	ARL13B_KAN602-1_1.tif:0001-0018	2.366	337.374	17	1469	135.6	2.939	0.58	798.274	30701	2.228	0.449	0.758	0.578651
741	ARL13B_KAN602-1_1.tif:0002-0077	2.886	359.072	135	834	44.067	12.468	0.469	1036.34	39857	4.008	0.25	0.742	0.751223
742	ARL13B_KAN602-1_1.tif:0003-0113	2.99	460.035	100	1430	166.081	18.441	0.558	1375.59	52904	3.147	0.318	0.793	0.997132
743	ARL13B_KAN602-1_1.tif:0004-0138	3.276	463.825	122	1435	56.037	22.253	0.569	1519.58	58442	3.145	0.318	0.778	1.10151
744	ARL13B_KAN602-1_1.tif:0005-0147	2.236	334.767	105	1196	73.183	23.666	0.581	748.585	28790	2.933	0.341	0.758	0.542632
745	ARL13B_KAN602-1_1.tif:0006-0177	3.354	463.426	127	1252	220.687	28.732	0.471	1554.43	59782	3.89	0.257	0.763	1.12677
746	ARL13B_KAN602-1_1.tif:0007-0208	3.224	359.476	75	1051	23.972	33.627	0.402	1159.02	44575	5.213	0.192	0.785	0.840147
747	ARL13B_KAN602-1_1.tif:0008-0230	4.836	657.919	102	2527	77.627	37.14	0.415	3181.89	122373	4.917	0.203	0.83	2.30648
748	ARL13B_KAN602-1_1.tif:0009-0231	3.874	413.96	34	1287	129.226	37.407	0.388	1603.78	61680	3.387	0.295	0.639	1.16254
749	ARL13B_KAN602-1_1.tif:0010-0230	4.16	520.212	111	1505	122.207	37.365	0.407	2164.21	83234	5.05	0.198	0.78	1.56879
750	ARL13B_KAN602-1_1.tif:0011-0238	3.25	592.648	92	1767	97.144	38.425	0.466	1926.22	74081	3.839	0.261	0.753	1.39627
751	ARL13B_KAN602-1_1.tif:0012-0379	3.432	327.985	123	908	120.691	61.29	0.551	1125.71	43294	3.114	0.321	0.841	0.816003
752	ARL13B_KAN602-1_1.tif:0013-0383	2.522	367.887	77	916	68.288	61.725	0.555	927.866	35685	1.766	0.566	0.743	0.672589
753	ARL13B_KAN602-1_1.tif:0014-0391	2.73	480.61	86	1226	9.951	63.335	0.396	1312.14	50464	4.328	0.231	0.682	0.951143
754	ARL13B_KAN602-1_1.tif:0015-0427	3.146	290.504	126	655	83.322	68.956	0.534	913.981	35151	3.038	0.329	0.761	0.662524
755	ARL13B_KAN602-1_1.tif:0016-0452	2.288	409.352	15	941	11.92	73.176	0.408	936.654	36023	2.917	0.343	0.68	0.67896
756	ARL13B_KAN602-1_1.tif:0017-0476	2.652	396.235	135	797	12.445	76.782	0.521	1050.88	40416	3.879	0.258	0.785	0.761759
757	ARL13B_KAN602-1_1.tif:0018-0486	2.73	301	130	652	215.128	78.278	0.403	821.779	31605	4.207	0.238	0.65	0.595689
758	ARL13B_KAN602-1_1.tif:0019-0504	3.016	615.19	86	1845	105.833	81.153	0.54	1855.52	71362	3.129	0.32	0.795	1.34503
759	ARL13B_KAN602-1_1.tif:0020-0582	3.874	744.208	75	2593	161.352	93.939	0.448	2883.24	110887	4.086	0.245	0.732	2.08999
760	ARL13B_KAN602-1_1.tif:0021-0579	2.106	384.519	14	1177	167.02	93.209	0.599	809.845	31146	1.778	0.562	0.74	0.587038
761	ARL13B_KAN602-1_1.tif:0022-0659	6.76	482.858	124	1100	78.898	106.269	0.321	3264.32	125543	6.736	0.148	0.707	2.36623
762	ARL13B_KAN602-1_1.tif:0023-0661	3.9	500.82	109	1505	34.727	106.601	0.465	1953.32	75123	4.43	0.226	0.85	1.41591
763	ARL13B_KAN602-1_1.tif:0024-0760	3.536	423.603	110	1000	6.24	122.43	0.428	1497.95	57610	4.512	0.222	0.745	1.08583
764	ARL13B_KAN602-1_1.tif:0025-0796	3.198	233.39	0	771	43.773	128.307	0.271	746.427	28707	6.506	0.154	0.641	0.541068
765	ARL13B_KAN602-1_1.tif:0026-0795	1.95	182.453	94	281	172.564	128.184	0.533	355.805	13684	3.631	0.275	0.806	0.257915
766	ARL13B_KAN602-1_1.tif:0027-0831	3.718	694.587	1	2037	103.141	133.871	0.529	2582.63	99326	1.589	0.629	0.699	1.87209
767	ARL13B_KAN602-1_1.tif:0028-0846	3.978	475.183	130	1741	128.183	136.415	0.434	1890.39	72703	4.897	0.204	0.748	1.3703
768	ARL13B_KAN602-1_1.tif:0029-0911	2.47	585.895	82	2578	115.563	146.832	0.566	1447.25	55660	3.169	0.316	0.76	1.04908
769	ARL13B_KAN602-1_1.tif:0030-0957	3.12	379.692	105	988	220.946	154.406	0.364	1184.71	45563	5.755	0.174	0.678	0.858769
770	ARL13B_KAN602-1_1.tif:0031-0961	3.406	591.962	44	2092	167.029	155.034	0.522	2016.34	77547	3.643	0.275	0.771	1.4616
771	ARL13B_KAN602-1_1.tif:0032-1005	2.184	219.06	71	531	52.47	161.949	0.288	478.455	18401	5.46	0.183	0.689	0.346821
772	ARL13B_KAN602-1_1.tif:0033-1015	3.38	620.569	23	2225	155.31	163.758	0.527	2097.65	80674	3.489	0.287	0.765	1.52054
773	ARL13B_KAN602-1_1.tif:0034-1030	1.612	370.226	34	840	33.935	166.335	0.516	596.84	22954	2.976	0.336	0.747	0.432636
774	ARL13B_KAN602-1_2.tif:0001-0145	2.392	257.543	72	772	113.948	23.383	0.323	616.081	23694	5.633	0.178	0.599	0.446583
775	ARL13B_KAN602-1_2.tif:0002-0167	2.938	261.752	103	741	156.139	26.768	0.358	769.074	29578	4.054	0.247	0.638	0.557485
776	ARL13B_KAN602-1_2.tif:0003-0208	3.484	719.873	81	1934	181.639	33.523	0.506	2508.19	96463	3.378	0.296	0.805	1.81813
777	ARL13B_KAN602-1_2.tif:0004-0222	3.328	305.086	35	711	200.005	35.826	0.528	1015.39	39051	3.849	0.26	0.826	0.736031
778	ARL13B_KAN602-1_2.tif:0005-0224	3.406	600.992	57	2832	82.804	36.405	0.492	2047.1	78730	3.636	0.275	0.74	1.4839
779	ARL13B_KAN602-1_2.tif:0006-0295	3.068	716.195	131	2288	209.738	47.324	0.499	2197.42	84511	3.358	0.298	0.774	1.59286
780	ARL13B_KAN602-1_2.tif:0007-0307	2.99	821.939	108	2542	176.872	49.638	0.529	2457.75	94523	3.068	0.326	0.785	1.78156
781	ARL13B_KAN602-1_2.tif:0008-0330	4.03	701.155	110	2367	114.266	53.282	0.525	2825.82	108679	3.034	0.33	0.767	2.04838
782	ARL13B_KAN602-1_2.tif:0009-0357	4.42	287.747	24	731	190.487	57.396	0.4	1271.92	48917	3.626	0.276	0.675	0.921985
783	ARL13B_KAN602-1_2.tif:0010-0424	3.406	583.015	119	1915	70.379	68.531	0.477	1985.87	76375	3.7	0.27	0.766	1.43951
784	ARL13B_KAN602-1_2.tif:0011-0432	4.056	438.84	130	1158	36.6	69.738	0.42	1780.04	68459	4.742	0.211	0.768	1.29031
785	ARL13B_KAN602-1_2.tif:0012-0447	2.6	292.91	107	610	185.176	72.003	0.393	761.612	29291	4.5	0.222	0.664	0.552075
786	ARL13B_KAN602-1_2.tif:0013-0495	3.224	301.516	121	895	69.562	79.873	0.422	972.147	37388	4.786	0.209	0.747	0.704687
787	ARL13B_KAN602-1_2.tif:0014-0493	3.38	439.615	90	1233	117.339	79.557	0.505	1485.99	57150	3.689	0.271	0.788	1.07716
788	ARL13B_KAN602-1_2.tif:0015-0557	5.148	565.217	135	1985	48.112	89.912	0.465	2909.91	111913	4.376	0.229	0.794	2.10933
789	ARL13B_KAN602-1_2.tif:0016-0561	3.198	432.049	138	1342	206.816	90.572	0.531	1381.78	53142	3.517	0.284	0.757	1.00162
790	ARL13B_KAN602-1_2.tif:0017-0629	4.186	288.727	120	723	128.032	101.364	0.447	1208.68	46485	4.3	0.233	0.74	0.876147
791	ARL13B_KAN602-1_2.tif:0018-0667	3.51	882.363	113	2855	86.999	107.706	0.493	3097.28	119119	4.334	0.231	0.794	2.24515
792	ARL13B_KAN602-1_2.tif:0019-0717	4.342	379.988	59	1540	213.16	115.765	0.381	1650.01	63458	3.635	0.275	0.673	1.19605
793	ARL13B_KAN602-1_2.tif:0020-0721	3.848	292.628	55	969	77.174	116.23	0.384	1126.1	43309	3.989	0.251	0.631	0.816286
794	ARL13B_KAN602-1_2.tif:0021-0745	1.664	342.812	66	855	132.57	120.209	0.573	570.474	21940	2.557	0.391	0.771	0.413524
795	ARL13B_KAN602-1_2.tif:0022-0769	3.198	528.122	93	1713	34.7	124.149	0.536	1689.04	64959	3.124	0.32	0.84	1.22434
796	ARL13B_KAN602-1_2.tif:0023-0788	4.082	396.49	93	849	214.673	127.045	0.262	1618.57	62249	7.609	0.131	0.681	1.17327
797	ARL13B_KAN602-1_2.tif:0024-0807	1.742	248.09	88	570	16.085	130.335	0.532	432.198	16622	2.739	0.365	0.757	0.313291
798	ARL13B_KAN602-1_2.tif:0025-0820	3.848	658.291	131	2017	79.951	132.447	0.556	2533.26	97427	2.825	0.354	0.796	1.8363
799	ARL13B_KAN602-1_2.tif:0026-0814	2.522	248.268	76	575	66.306	131.36	0.454	626.17	24082	4.136	0.242	0.776	0.453896
800	ARL13B_KAN602-1_2.tif:0027-0838	4.498	378.081	86	1091	36.307	135	0.374	1700.71	65408	5.138	0.195	0.812	1.23281
801	ARL13B_KAN602-1_2.tif:0028-0849	4.342	439.713	93	1404	191.435	136.993	0.446	1909.35	73432	4.979	0.201	0.877	1.38404
802	ARL13B_KAN602-1_2.tif:0029-0883	3.744	439	127	1234	117.419	142.298	0.473	1643.71	63216	3.956	0.253	0.783	1.19149
803	ARL13B_KAN602-1_2.tif:0030-0957	3.068	665.085	133	1799	206.96	154.401	0.523	2040.6	78480	4.016	0.249	0.817	1.47919
804	ARL13B_KAN602-1_2.tif:0031-0963	3.38	378.292	35	1093	158.169	155.32	0.45	1278.7	49178	4.205	0.238	0.788	0.926904
805	ARL13B_KAN602-1_2.tif:0032-1005	3.094	283.571	55	628	84.794	162.001	0.554	877.423	33745	2.922	0.342	0.785	0.636024
806	ARL13B_KAN602-1_2.tif:0033-1014	1.768	420.044	114	1182	151.426	163.562	0.418	742.683	28563	3.588	0.279	0.712	0.538354
807	ARL13B_KAN602-1_3.tif:0001-0041	3.276	272.992	57	515	10.465	6.474	0.391	894.376	34397	4.2	0.238	0.71	0.648313
808	ARL13B_KAN602-1_3.tif:0002-0060	2.158	447.289	59	1456	193.417	9.612	0.532	965.308	37125	3.348	0.299	0.755	0.69973
809	ARL13B_KAN602-1_3.tif:0003-0075	4.472	325.907	114	811	144.048	11.974	0.403	1457.54	56056	4.584	0.218	0.753	1.05654
810	ARL13B_KAN602-1_3.tif:0004-0131	5.538	407.075	97	1278	158.226	20.834	0.375	2254.52	86707	4.952	0.202	0.732	1.63425
811	ARL13B_KAN602-1_3.tif:0005-0174	2.522	339.124	52	853	138.99	28.002	0.443	855.322	32895	3.904	0.256	0.695	0.620003
812	ARL13B_KAN602-1_3.tif:0006-0178	1.69	258.492	53	690	223.248	28.927	0.495	436.878	16802	3.1	0.323	0.765	0.316683
813	ARL13B_KAN602-1_3.tif:0007-0183	2.704	420.923	81	1241	46.764	29.751	0.566	1138.24	43776	2.852	0.351	0.77	0.825088
814	ARL13B_KAN602-1_3.tif:0008-0243	3.328	598.156	56	2253	166.255	39.065	0.495	1990.78	76564	3.434	0.291	0.727	1.44307
815	ARL13B_KAN602-1_3.tif:0009-0356	4.55	503.829	108	1328	219.315	57.324	0.439	2292.56	88170	3.648	0.274	0.731	1.66182
816	ARL13B_KAN602-1_3.tif:0010-0451	4.108	783.095	70	2527	129.81	72.858	0.557	3217.15	123729	2.921	0.342	0.782	2.33204
817	ARL13B_KAN602-1_3.tif:0011-0471	3.458	455.925	77	1248	84.041	76.147	0.495	1576.68	60638	3.999	0.25	0.816	1.1429
818	ARL13B_KAN602-1_3.tif:0012-0521	4.576	451.449	103	1439	155.118	83.947	0.46	2065.95	79455	4.503	0.222	0.822	1.49756
819	ARL13B_KAN602-1_3.tif:0013-0534	3.172	297.107	45	598	22.74	86.137	0.455	942.479	36247	4.466	0.224	0.827	0.683182
820	ARL13B_KAN602-1_3.tif:0014-0614	4.134	489.704	87	1199	58.437	99.066	0.522	2024.56	77863	3.109	0.322	0.746	1.46756
821	ARL13B_KAN602-1_3.tif:0015-0621	3.484	633.746	98	2454	98.638	100.154	0.579	2208.11	84922	3.165	0.316	0.805	1.60061
822	ARL13B_KAN602-1_3.tif:0016-0664	5.434	597.526	134	1795	147.484	107.337	0.474	3247.15	124883	3.57	0.28	0.764	2.35379
823	ARL13B_KAN602-1_3.tif:0017-0777	4.368	549.423	40	1376	189.136	125.299	0.511	2400.02	92303	3.655	0.274	0.802	1.73972
824	ARL13B_KAN602-1_3.tif:0018-0847	3.952	768.625	133	2271	133.189	136.664	0.445	3037.79	116831	4.511	0.222	0.828	2.20202
825	ARL13B_KAN602-1_3.tif:0019-0862	3.094	413.277	99	1048	75.841	138.861	0.443	1278.76	49180	4.193	0.239	0.758	0.926942
826	ARL13B_KAN602-1_3.tif:0020-0893	3.588	355.522	134	906	88.712	144.075	0.44	1275.69	49062	4.219	0.237	0.75	0.924718
827	ARL13B_KAN602-1_3.tif:0021-0912	3.562	537.248	125	1586	154.801	147.094	0.452	1913.79	73603	3.6	0.278	0.783	1.38727
828	ARL13B_KAN602-1_3.tif:0022-0985	3.12	534.7	110	1456	120.178	158.911	0.559	1668.36	64164	3.416	0.293	0.803	1.20936
829	ARL13B_KAN602-1_3.tif:0023-1025	3.9	477.04	123	1855	176.041	165.389	0.537	1860.57	71556	3.679	0.272	0.831	1.34868
830	ARL13B_KAN602-1_4.tif:0001-0036	1.508	313.362	58	794	112.945	5.88	0.455	472.578	18175	4.112	0.243	0.725	0.342561
831	ARL13B_KAN602-1_4.tif:0002-0085	3.406	599.931	130	1552	137.845	13.542	0.379	2043.49	78591	5.192	0.193	0.712	1.48128
832	ARL13B_KAN602-1_4.tif:0003-0222	2.886	169.676	93	273	190.913	35.66	0.446	489.713	18834	2.62	0.382	0.638	0.354982
833	ARL13B_KAN602-1_4.tif:0004-0333	3.562	725.511	111	2256	163.203	53.69	0.496	2584.43	99395	4.077	0.245	0.797	1.87339
834	ARL13B_KAN602-1_4.tif:0005-0385	2.782	285.561	50	734	81.905	62.087	0.513	794.478	30555	3.67	0.272	0.833	0.575899
835	ARL13B_KAN602-1_4.tif:0006-0442	2.704	480.885	78	1479	171.88	71.203	0.532	1300.39	50012	3.934	0.254	0.897	0.942624
836	ARL13B_KAN602-1_4.tif:0007-0540	3.042	666.188	0	2133	171.248	87.18	0.419	2026.67	77944	4.91	0.204	0.824	1.46908
837	ARL13B_KAN602-1_4.tif:0008-0573	2.34	581.456	66	1761	91.597	92.747	0.433	1360.69	52331	3.74	0.267	0.714	0.986332
838	ARL13B_KAN602-1_4.tif:0009-0607	2.678	401.505	80	985	30.61	97.607	0.386	1075.3	41355	3.605	0.277	0.628	0.779457
839	ARL13B_KAN602-1_4.tif:0010-0658	2.886	518.36	60	1322	45.117	106.11	0.448	1496.08	57538	4.759	0.21	0.825	1.08447
840	ARL13B_KAN602-1_4.tif:0011-0672	2.028	194.936	0	414	173.317	108.517	0.402	395.354	15205	3.488	0.287	0.619	0.286583
841	ARL13B_KAN602-1_4.tif:0012-0744	1.664	338.391	130	562	14.263	119.988	0.419	563.116	21657	4.33	0.231	0.703	0.40819
842	ARL13B_KAN602-1_4.tif:0013-0781	2.626	645.525	47	1826	85.961	125.892	0.544	1695.25	65198	3.313	0.302	0.789	1.22885
843	ARL13B_KAN602-1_4.tif:0014-0822	2.002	371.623	81	875	48.443	132.683	0.375	744.035	28615	5.182	0.193	0.694	0.539334
844	ARL13B_KAN602-1_4.tif:0015-0830	2.782	639.131	68	1570	170.798	133.612	0.41	1778.17	68387	4.52	0.221	0.684	1.28895
845	ARL13B_KAN602-1_4.tif:0016-0830	3.12	404.908	102	1094	133.621	134.078	0.396	1263.39	48589	3.836	0.261	0.649	0.915803
846	ARL13B_KAN602-1_4.tif:0017-0870	2.236	655.151	114	1783	155.824	140.289	0.566	1465.01	56343	2.98	0.336	0.775	1.06195
847	ARL13B_KAN602-1_4.tif:0018-0890	1.638	305.143	139	545	41.627	143.496	0.441	499.854	19224	4.57	0.219	0.783	0.362333
848	ARL13B_KAN602-1_4.tif:0019-0910	2.808	667.083	84	2062	135.438	146.672	0.34	1873.28	72045	5.073	0.197	0.763	1.3579
849	ARL13B_KAN602-1_4.tif:0020-0966	1.066	235.976	130	399	8.753	155.797	0.365	251.565	9675	6.045	0.165	0.759	0.182354
850	ARL13B_KAN602-1_4.tif:0021-0986	2.028	441.051	134	934	54.306	159.061	0.487	894.506	34402	3.747	0.267	0.732	0.648407
851	ARL13B_KAN602-1_4.tif:0022-0992	2.704	213.625	84	430	118.457	159.938	0.408	577.677	22217	3.654	0.274	0.73	0.418745
852	ARL13B_KAN602-1_4.tif:0023-1021	2.652	326.461	96	733	185.028	164.687	0.548	865.826	33299	3.503	0.285	0.85	0.627618
853	ARL13B_KAN602-1_5.tif:0001-0052	3.822	506.748	76	1216	87.949	8.224	0.397	1936.91	74492	2.972	0.336	0.631	1.40402
854	ARL13B_KAN602-1_5.tif:0002-0045	1.586	276.164	127	600	41.95	7.31	0.554	438.022	16846	3.542	0.282	0.777	0.317513
855	ARL13B_KAN602-1_5.tif:0003-0104	2.028	247.782	134	424	15.129	16.882	0.385	502.532	19327	6.029	0.166	0.743	0.364274
856	ARL13B_KAN602-1_5.tif:0004-0108	3.38	597.538	65	1744	195.82	17.23	0.427	2019.8	77680	3.977	0.251	0.67	1.46411
857	ARL13B_KAN602-1_5.tif:0005-0117	4.732	502	71	1548	165.085	19.009	0.359	2375.61	91364	5.652	0.177	0.766	1.72202
858	ARL13B_KAN602-1_5.tif:0006-0164	6.318	516.128	85	1649	61.389	26.114	0.26	3261.09	125419	6.639	0.151	0.65	2.36389
859	ARL13B_KAN602-1_5.tif:0007-0237	2.522	237.794	0	503	66.017	38.526	0.492	599.752	23066	1.88	0.532	0.698	0.434747
860	ARL13B_KAN602-1_5.tif:0008-0245	1.95	268.76	38	542	216.508	39.509	0.311	524.114	20157	5.382	0.186	0.605	0.379918
861	ARL13B_KAN602-1_5.tif:0009-0261	3.016	574.431	21	1808	120.604	42.129	0.543	1732.59	66634	3.273	0.306	0.817	1.25591
862	ARL13B_KAN602-1_5.tif:0010-0282	2.86	636.473	41	1822	173.587	45.49	0.457	1820.42	70012	4.343	0.23	0.859	1.31958
863	ARL13B_KAN602-1_5.tif:0011-0305	4.94	456.674	127	1116	150.515	49.605	0.308	2256.1	86768	4.541	0.22	0.628	1.6354
864	ARL13B_KAN602-1_5.tif:0012-0375	3.302	562.961	95	1752	98.936	60.238	0.566	1859.01	71496	2.588	0.386	0.76	1.34755
865	ARL13B_KAN602-1_5.tif:0013-0396	2.054	319.962	38	646	4.943	63.689	0.426	657.242	25277	2.591	0.386	0.608	0.47642
866	ARL13B_KAN602-1_5.tif:0014-0428	4.368	372.845	134	985	160.906	69.439	0.322	1628.69	62638	2.546	0.393	0.557	1.1806
867	ARL13B_KAN602-1_5.tif:0015-0491	2.912	417.518	69	1169	80.828	79.155	0.475	1215.88	46762	4.356	0.23	0.749	0.881368
868	ARL13B_KAN602-1_5.tif:0016-0490	3.042	377.615	86	970	113.813	79.044	0.439	1148.78	44181	4.473	0.224	0.707	0.832721
869	ARL13B_KAN602-1_5.tif:0017-0550	3.224	624.653	58	1719	130.286	88.629	0.453	2014	77457	4.211	0.237	0.745	1.45991
870	ARL13B_KAN602-1_5.tif:0018-0566	2.158	212.819	58	478	50.771	91.406	0.348	459.292	17664	6.2	0.161	0.79	0.33293
871	ARL13B_KAN602-1_5.tif:0019-0580	4.108	334.456	22	885	95.144	93.61	0.376	1374.03	52844	5.56	0.18	0.825	0.996001
872	ARL13B_KAN602-1_5.tif:0020-0591	2.34	453.444	38	1479	146.818	95.444	0.52	1061.12	40810	3.016	0.332	0.726	0.769185
873	ARL13B_KAN602-1_5.tif:0021-0628	2.6	487.73	133	1723	191.459	101.61	0.507	1268.17	48773	2.374	0.421	0.719	0.919271
874	ARL13B_KAN602-1_5.tif:0022-0636	2.288	267.511	121	728	25.765	102.484	0.283	612.103	23541	7.492	0.133	0.645	0.4437
875	ARL13B_KAN602-1_5.tif:0023-0646	2.756	316.075	108	719	52.723	104.411	0.498	871.156	33504	3.54	0.283	0.739	0.631482
876	ARL13B_KAN602-1_5.tif:0024-0721	3.276	346.627	43	802	117.972	116.522	0.406	1135.62	43675	2.614	0.383	0.603	0.823184
877	ARL13B_KAN602-1_5.tif:0025-0728	4.238	348.92	109	1239	109.259	117.433	0.247	1478.81	56874	8.677	0.115	0.616	1.07196
878	ARL13B_KAN602-1_5.tif:0026-0736	4.134	453.792	46	2118	186.07	118.781	0.403	1876.09	72153	4.302	0.232	0.726	1.35994
879	ARL13B_KAN602-1_5.tif:0027-0759	4.212	468.259	130	1850	150.857	122.485	0.366	1972.43	75858	5.643	0.177	0.692	1.42977
880	ARL13B_KAN602-1_5.tif:0028-0794	1.586	278.623	131	602	40.813	128.031	0.579	441.923	16996	3.482	0.287	0.824	0.32034
881	ARL13B_KAN602-1_5.tif:0029-0822	2.73	415.876	74	1067	112.441	132.729	0.564	1135.41	43667	3.585	0.279	0.875	0.823033
882	ARL13B_KAN602-1_5.tif:0030-0835	1.144	219.5	137	347	19.566	134.849	0.42	251.123	9658	4.969	0.201	0.682	0.182033
883	ARL13B_KAN602-1_5.tif:0031-0840	2.496	293.365	130	779	57.675	135.294	0.316	732.282	28163	6.817	0.147	0.667	0.530815
884	ARL13B_KAN602-1_5.tif:0032-0896	2.834	401.275	49	1012	211.493	144.673	0.519	1137.28	43739	3.277	0.305	0.784	0.82439
885	ARL13B_KAN602-1_5.tif:0033-0907	2.652	282.373	43	692	71.108	146.142	0.342	748.897	28802	4.502	0.222	0.598	0.542859
886	ARL13B_KAN602-1_5.tif:0034-0915	3.094	538.521	106	1668	171.679	147.54	0.438	1666.28	64084	4.276	0.234	0.775	1.20785
887	ARL13B_KAN602-1_5.tif:0035-0959	2.418	306.946	79	953	140.573	154.811	0.405	742.241	28546	4.338	0.231	0.676	0.538034
888	ARL13B_KAN602-1_6.tif:0001-0018	3.042	557.932	109	1294	78.7	2.836	0.376	1697.33	65278	2.89	0.346	0.585	1.23036
889	ARL13B_KAN602-1_6.tif:0002-0011	1.144	287.068	99	536	32.587	1.777	0.437	328.426	12631	4.8	0.208	0.759	0.238068
890	ARL13B_KAN602-1_6.tif:0003-0072	3.406	467.038	52	1162	186.273	11.428	0.478	1590.83	61182	4.115	0.243	0.764	1.15316
891	ARL13B_KAN602-1_6.tif:0004-0070	1.664	275.375	130	506	5.78	11.335	0.355	458.252	17624	6.723	0.149	0.723	0.332176
892	ARL13B_KAN602-1_6.tif:0005-0083	3.978	567.471	63	1889	155.651	13.406	0.319	2257.53	86823	6.38	0.157	0.759	1.63644
893	ARL13B_KAN602-1_6.tif:0006-0130	5.746	448.118	39	1457	52.122	20.718	0.236	2575.04	99034	7.251	0.138	0.608	1.86659
894	ARL13B_KAN602-1_6.tif:0007-0165	2.652	479	123	1280	215.949	26.608	0.505	1270.38	48858	3.608	0.277	0.846	0.920873
895	ARL13B_KAN602-1_6.tif:0008-0203	1.976	176.579	12	326	56.701	33.135	0.472	348.941	13420	1.793	0.558	0.724	0.252939
896	ARL13B_KAN602-1_6.tif:0009-0211	2.002	251.987	9	608	207.09	34.029	0.34	504.508	19403	5.715	0.175	0.655	0.365707
897	ARL13B_KAN602-1_6.tif:0010-0227	2.678	590.515	40	2059	111.205	36.615	0.54	1581.49	60823	3.625	0.276	0.831	1.14639
898	ARL13B_KAN602-1_6.tif:0011-0272	4.108	427.234	130	1231	141.359	44.223	0.275	1755.18	67503	5.413	0.185	0.585	1.27229
899	ARL13B_KAN602-1_6.tif:0012-0340	2.288	652.352	92	1765	89.615	54.719	0.448	1492.67	57407	2.739	0.365	0.64	1.082
900	ARL13B_KAN602-1_6.tif:0013-0394	3.822	392.565	106	986	151.52	63.918	0.297	1500.47	57707	2.617	0.382	0.517	1.08766
901	ARL13B_KAN602-1_6.tif:0014-0457	2.652	281.118	86	571	71.383	73.756	0.424	745.569	28674	4.45	0.225	0.726	0.540446
902	ARL13B_KAN602-1_6.tif:0015-0456	2.886	251.613	116	547	104.456	73.563	0.451	726.198	27929	4.377	0.228	0.74	0.526404
903	ARL13B_KAN602-1_6.tif:0016-0516	3.302	475.039	43	1478	120.918	83.103	0.498	1568.67	60330	3.907	0.256	0.822	1.1371
904	ARL13B_KAN602-1_6.tif:0017-0532	1.612	268.258	52	585	41.639	85.816	0.307	432.458	16632	6.807	0.147	0.697	0.313479
905	ARL13B_KAN602-1_6.tif:0018-0546	3.64	432.65	31	1195	85.56	88.051	0.328	1574.94	60571	7.203	0.139	0.763	1.14164
906	ARL13B_KAN602-1_6.tif:0019-0558	2.106	331.963	5	834	137.374	90.02	0.475	699.156	26889	3.054	0.327	0.689	0.506803
907	ARL13B_KAN602-1_6.tif:0020-0602	1.742	223.313	117	445	16.509	96.939	0.215	389.035	14962	8.719	0.115	0.568	0.282003
908	ARL13B_KAN602-1_6.tif:0021-0612	2.08	383.9	101	863	43.404	98.866	0.436	798.56	30712	4.353	0.23	0.717	0.578858
909	ARL13B_KAN602-1_6.tif:0022-0687	2.678	368.058	25	920	108.514	111.038	0.348	985.719	37910	2.612	0.383	0.538	0.714526
910	ARL13B_KAN602-1_6.tif:0023-0694	4.03	226.51	116	757	99.888	111.928	0.244	912.889	35109	8.387	0.119	0.603	0.661733
911	ARL13B_KAN602-1_6.tif:0024-0702	4.55	334.834	96	1260	176.697	113.25	0.466	1523.59	58596	3.965	0.252	0.769	1.10441
912	ARL13B_KAN602-1_6.tif:0025-0724	3.796	463.822	131	1442	141.54	116.889	0.348	1760.77	67718	5.727	0.175	0.689	1.27635
913	ARL13B_KAN602-1_6.tif:0026-0736	1.196	176.565	101	262	114.516	118.705	0.439	211.185	8122	3.065	0.326	0.652	0.153083
914	ARL13B_KAN602-1_6.tif:0027-0759	1.222	313.383	136	585	31.442	122.49	0.474	382.977	14729	4.515	0.221	0.797	0.277611
915	ARL13B_KAN602-1_6.tif:0028-0788	2.262	483.862	60	1412	103.049	127.212	0.527	1094.56	42096	3.868	0.259	0.849	0.793423
916	ARL13B_KAN602-1_6.tif:0029-0805	2.21	265.941	92	682	48.292	129.726	0.31	587.765	22605	6.695	0.149	0.62	0.426058
917	ARL13B_KAN602-1_6.tif:0030-0862	2.73	289.99	122	672	202.199	139.097	0.542	791.722	30449	2.737	0.365	0.805	0.573901
918	ARL13B_KAN602-1_6.tif:0031-0873	2.158	351.205	34	773	61.797	140.619	0.291	757.946	29150	4.977	0.201	0.555	0.549418
919	ARL13B_KAN602-1_6.tif:0032-0881	2.86	560.845	94	1655	162.304	141.992	0.442	1604.12	61693	4.285	0.233	0.791	1.16279
920	ARL13B_KAN602-1_6.tif:0033-0926	2.236	205.372	34	523	131.55	149.453	0.543	459.24	17662	3.183	0.314	0.771	0.332892
921	ARL13B_KAN602-1_6.tif:0034-1012	4.134	401.057	63	1017	140.754	163.214	0.27	1658.07	63768	7.466	0.134	0.688	1.2019
922	ARL13B_KAN602-1_6.tif:0035-1025	3.198	441.919	80	944	170.767	165.148	0.333	1413.34	54356	5.567	0.18	0.699	1.0245
										53056.2				1
923	ARL13B_KAN602-5_1.tif:0001-0113	2.574	334.545	89	776	26.032	18.229	0.332	861.172	33120	6.253	0.16	0.664	0.624244
924	ARL13B_KAN602-5_1.tif:0002-0172	3.874	519.732	130	1575	135.18	27.936	0.499	2013.56	77440	3.804	0.263	0.821	1.45959
925	ARL13B_KAN602-5_1.tif:0003-0183	2.418	582.505	61	1967	55.818	29.77	0.441	1408.58	54173	2.819	0.355	0.667	1.02105
926	ARL13B_KAN602-5_1.tif:0004-0232	2.73	219.695	87	424	206.063	37.544	0.458	599.804	23068	3.114	0.321	0.693	0.434784
927	ARL13B_KAN602-5_1.tif:0005-0263	3.432	309.28	134	914	98.487	42.625	0.409	1061.51	40825	4.387	0.228	0.77	0.769468
928	ARL13B_KAN602-5_1.tif:0006-0293	3.068	376.458	61	1069	182.065	47.327	0.494	1155.04	44422	3.437	0.291	0.717	0.837264
929	ARL13B_KAN602-5_1.tif:0007-0381	1.82	414.514	131	911	132.529	61.39	0.492	754.461	29016	3.211	0.311	0.725	0.546892
930	ARL13B_KAN602-5_1.tif:0008-0393	2.34	243.289	130	389	14.296	63.418	0.487	569.33	21896	4.365	0.229	0.811	0.412695
931	ARL13B_KAN602-5_1.tif:0009-0399	4.004	599.773	124	2571	111.421	64.492	0.585	2401.64	92365	3.327	0.301	0.828	1.74089
932	ARL13B_KAN602-5_1.tif:0010-0398	1.69	267.892	20	644	134.189	64.338	0.531	452.765	17413	2.672	0.374	0.76	0.328199
933	ARL13B_KAN602-5_1.tif:0011-0416	3.64	289.85	81	643	70.987	67.018	0.366	1055.12	40579	2.443	0.409	0.592	0.764831
934	ARL13B_KAN602-5_1.tif:0012-0475	3.796	484.233	42	1376	37.875	76.418	0.501	1838.26	70698	2.602	0.384	0.695	1.33251
935	ARL13B_KAN602-5_1.tif:0013-0541	2.964	523.421	57	1392	188.453	87.12	0.538	1551.51	59670	2.963	0.338	0.745	1.12466
936	ARL13B_KAN602-5_1.tif:0014-0547	3.64	679.771	44	1729	221.396	88.117	0.518	2474.52	95168	3.708	0.27	0.838	1.79372
937	ARL13B_KAN602-5_1.tif:0015-0638	3.198	305.187	65	847	96.201	102.75	0.409	976.047	37538	4.383	0.228	0.721	0.707514
938	ARL13B_KAN602-5_1.tif:0016-0725	2.782	284.664	133	672	71.834	116.844	0.544	791.982	30459	3.244	0.308	0.836	0.57409
939	ARL13B_KAN602-5_1.tif:0017-0764	2.756	308	114	687	220.955	123.504	0.435	848.899	32648	3.566	0.28	0.736	0.615348
940	ARL13B_KAN602-5_1.tif:0018-0770	2.288	742.58	20	2943	136.029	124.456	0.543	1699.12	65347	2.005	0.499	0.713	1.23166
941	ARL13B_KAN602-5_1.tif:0019-0779	3.796	494.349	23	1550	165.155	125.556	0.463	1876.66	72175	4.555	0.22	0.877	1.36035
942	ARL13B_KAN602-5_1.tif:0020-0865	2.262	600.759	48	1436	198.257	139.408	0.458	1359	52266	3.103	0.322	0.725	0.985107
943	ARL13B_KAN602-5_1.tif:0021-0945	3.432	562.068	45	1466	73.157	152.506	0.415	1929.13	74193	4.29	0.233	0.686	1.39839
944	ARL13B_KAN602-5_1.tif:0022-0992	2.548	278.449	16	680	220.077	159.917	0.396	709.531	27288	4.646	0.215	0.69	0.514323
945	ARL13B_KAN602-5_1.tif:0023-0993	1.612	223.758	49	548	38.934	160.168	0.385	360.72	13873	5.616	0.178	0.756	0.261478
946	ARL13B_KAN602-5_1.tif:0024-1004	1.898	243.479	98	511	195.323	161.874	0.291	462.152	17774	6.058	0.165	0.568	0.335003
947	ARL13B_KAN602-5_2.tif:0001-0022	4.706	359.68	52	1058	109.639	3.45	0.38	1692.75	65102	5.171	0.193	0.693	1.22704
948	ARL13B_KAN602-5_2.tif:0002-0078	5.018	453.642	108	1083	198.758	12.616	0.32	2276.51	87553	5.961	0.168	0.682	1.65019
949	ARL13B_KAN602-5_2.tif:0003-0091	3.666	341.582	102	895	157.524	14.893	0.336	1252.31	48163	5.671	0.176	0.67	0.907774
950	ARL13B_KAN602-5_2.tif:0004-0089	2.366	259.44	130	652	177.675	14.276	0.426	613.871	23609	4.653	0.215	0.65	0.444981
951	ARL13B_KAN602-5_2.tif:0005-0152	3.484	352.493	89	900	145.634	24.814	0.281	1228.16	47234	3.889	0.257	0.535	0.890264
952	ARL13B_KAN602-5_2.tif:0006-0151	3.692	287.141	118	616	32.689	24.312	0.439	1060.19	40774	4.626	0.216	0.763	0.768506
953	ARL13B_KAN602-5_2.tif:0007-0228	3.978	263.438	94	648	61.781	36.891	0.369	1048.02	40306	4.377	0.228	0.67	0.759685
954	ARL13B_KAN602-5_2.tif:0008-0270	2.652	372.676	130	1015	70.501	43.549	0.497	988.398	38013	3.954	0.253	0.753	0.716467
955	ARL13B_KAN602-5_2.tif:0009-0297	4.056	470.615	131	1596	92.122	48.074	0.49	1908.93	73416	4.03	0.248	0.784	1.38374
956	ARL13B_KAN602-5_2.tif:0010-0415	4.81	485.032	90	1601	183.416	66.753	0.367	2333.15	89731	3.826	0.261	0.608	1.69125
957	ARL13B_KAN602-5_2.tif:0011-0464	3.172	323.369	107	824	70.805	74.881	0.422	1025.79	39451	3.944	0.254	0.678	0.74357
958	ARL13B_KAN602-5_2.tif:0012-0499	2.028	217.077	61	564	204.837	80.472	0.391	440.259	16932	4.558	0.219	0.69	0.319133
959	ARL13B_KAN602-5_2.tif:0013-0536	2.106	174.531	100	382	29.187	86.56	0.432	367.584	14137	4.026	0.248	0.684	0.266453
960	ARL13B_KAN602-5_2.tif:0014-0579	3.224	449.218	135	1433	150.412	93.392	0.554	1448.37	55703	3.417	0.293	0.818	1.04989
961	ARL13B_KAN602-5_2.tif:0015-0641	5.07	331.328	52	743	93.455	103.529	0.277	1679.93	64609	8.12	0.123	0.751	1.21775
962	ARL13B_KAN602-5_2.tif:0016-0666	3.302	392.646	59	1226	81.593	107.662	0.308	1296.59	49866	5.987	0.167	0.638	0.939872
963	ARL13B_KAN602-5_2.tif:0017-0670	3.276	373.889	75	812	127.938	108.14	0.49	1224.93	47110	3.275	0.305	0.821	0.887927
964	ARL13B_KAN602-5_2.tif:0018-0749	2.912	334.339	23	1002	178.815	120.566	0.261	973.655	37446	6.168	0.162	0.599	0.70578
965	ARL13B_KAN602-5_2.tif:0019-0810	3.77	374.386	89	1325	123.524	130.297	0.308	1411.52	54286	6.253	0.16	0.704	1.02318
966	ARL13B_KAN602-5_2.tif:0020-0831	2.496	350.51	107	880	162.046	134.256	0.314	874.927	33649	4.458	0.224	0.568	0.634215
967	ARL13B_KAN602-5_2.tif:0021-0838	2.73	198.962	100	431	64.321	134.864	0.303	543.199	20891	6.63	0.151	0.702	0.393753
968	ARL13B_KAN602-5_2.tif:0022-0852	3.12	221.108	26	381	149.679	137.284	0.448	689.9	26533	3.962	0.252	0.767	0.500093
969	ARL13B_KAN602-5_2.tif:0023-0954	1.43	392.291	133	816	24.377	153.995	0.382	561.01	21576	5.383	0.186	0.625	0.406663
970	ARL13B_KAN602-5_3.tif:0001-0009	3.042	298.538	108	709	59.55	1.31	0.474	908.209	34929	2.965	0.337	0.793	0.65834
971	ARL13B_KAN602-5_3.tif:0002-0110	3.562	223.547	56	434	176.37	17.742	0.495	796.324	30626	4.351	0.23	0.932	0.577237
972	ARL13B_KAN602-5_3.tif:0003-0130	1.69	288.754	118	665	12.42	20.969	0.444	488.023	18769	4.588	0.218	0.718	0.353757
973	ARL13B_KAN602-5_3.tif:0004-0155	2.73	164.162	25	383	59.84	24.878	0.39	448.189	17237	5.187	0.193	0.85	0.324882
974	ARL13B_KAN602-5_3.tif:0005-0173	1.56	527.983	108	1515	112.743	28.197	0.476	823.704	31679	3.019	0.331	0.774	0.597084
975	ARL13B_KAN602-5_3.tif:0006-0210	2.782	518.664	132	1874	155.034	33.835	0.483	1443.01	55497	3.559	0.281	0.721	1.046
976	ARL13B_KAN602-5_3.tif:0007-0248	1.534	196.932	41	573	13.423	40.054	0.442	302.112	11619	4.271	0.234	0.69	0.218994
977	ARL13B_KAN602-5_3.tif:0008-0276	4.16	298.663	55	619	197.956	44.369	0.524	1242.51	47786	2.751	0.363	0.721	0.900668
978	ARL13B_KAN602-5_3.tif:0009-0352	2.73	317.048	48	815	91.942	56.798	0.475	865.592	33290	4.677	0.214	0.868	0.627448
979	ARL13B_KAN602-5_3.tif:0010-0369	2.366	325.681	26	835	78.542	59.353	0.438	770.608	29637	2.544	0.393	0.659	0.558597
980	ARL13B_KAN602-5_3.tif:0011-0401	3.588	204.601	43	424	174.691	64.854	0.392	734.154	28235	4.039	0.248	0.66	0.532172
981	ARL13B_KAN602-5_3.tif:0012-0427	1.872	227.708	94	432	35.13	68.955	0.443	426.296	16395	3.488	0.287	0.738	0.309012
982	ARL13B_KAN602-5_3.tif:0013-0448	2.392	369.391	41	1194	121.414	72.273	0.346	883.637	33984	6.001	0.167	0.639	0.640529
983	ARL13B_KAN602-5_3.tif:0014-0482	2.288	272.318	96	682	209.434	77.733	0.472	623.102	23964	4.055	0.247	0.85	0.451672
984	ARL13B_KAN602-5_3.tif:0015-0563	2.782	395.523	131	1001	53.206	90.795	0.56	1100.41	42321	3.512	0.285	0.801	0.797664
985	ARL13B_KAN602-5_3.tif:0016-0569	3.666	896.234	127	3832	148.783	91.802	0.539	3285.79	126369	3.21	0.312	0.76	2.3818
986	ARL13B_KAN602-5_3.tif:0017-0624	3.094	471.151	134	1519	73.504	100.585	0.474	1457.83	56067	3.727	0.268	0.721	1.05675
987	ARL13B_KAN602-5_3.tif:0018-0725	4.108	360.766	101	1202	104.841	117.058	0.351	1482.12	57001	6	0.167	0.814	1.07435
988	ARL13B_KAN602-5_3.tif:0019-0768	5.226	294.348	52	717	53.349	123.755	0.361	1538.36	59164	5.301	0.189	0.734	1.11512
989	ARL13B_KAN602-5_3.tif:0020-0803	2.678	484.155	86	1568	177.445	129.478	0.493	1296.65	49868	3.728	0.268	0.78	0.93991
990	ARL13B_KAN602-5_3.tif:0021-0824	2.938	284.097	133	666	21.588	132.996	0.461	834.728	32103	4.819	0.208	0.819	0.605076
991	ARL13B_KAN602-5_3.tif:0022-0864	3.406	283.137	98	736	88.094	139.494	0.403	964.424	37091	3.094	0.323	0.637	0.699089
992	ARL13B_KAN602-5_3.tif:0023-0932	2.73	270.79	83	991	115.319	150.192	0.367	739.303	28433	5.574	0.179	0.689	0.535904
993	ARL13B_KAN602-5_3.tif:0024-0955	2.21	419.306	112	902	16.153	153.856	0.463	926.722	35641	3.423	0.292	0.756	0.67176
994	ARL13B_KAN602-5_3.tif:0025-0964	3.666	303.099	113	764	52.489	155.193	0.306	1111.23	42737	4.433	0.226	0.576	0.805505
995	ARL13B_KAN602-5_4.tif:0001-0102	1.508	263.879	137	500	20.874	16.434	0.297	397.954	15305	7.791	0.128	0.69	0.288468
996	ARL13B_KAN602-5_4.tif:0002-0165	4.602	476.469	81	1567	183.482	26.504	0.354	2192.84	84335	5.276	0.19	0.72	1.58954
997	ARL13B_KAN602-5_4.tif:0003-0181	4.732	451.742	131	1053	128.189	29.155	0.475	2137.77	82217	4.249	0.235	0.829	1.54962
998	ARL13B_KAN602-5_4.tif:0004-0176	3.094	255.739	69	795	57.446	28.448	0.349	791.306	30433	3.761	0.266	0.692	0.5736
999	ARL13B_KAN602-5_4.tif:0005-0252	3.692	182.514	38	322	142.612	40.86	0.366	673.883	25917	5.714	0.175	0.805	0.488482
1000	ARL13B_KAN602-5_4.tif:0006-0272	2.47	222.474	91	389	71.898	43.92	0.302	549.543	21135	6.176	0.162	0.638	0.398351
1001	ARL13B_KAN602-5_4.tif:0007-0295	3.9	399.66	105	1047	214.673	47.601	0.351	1558.77	59949	5.795	0.173	0.754	1.12992
1002	ARL13B_KAN602-5_4.tif:0008-0290	2.782	365.093	100	1075	105.139	46.867	0.417	1015.75	39065	5.02	0.199	0.728	0.736295
1003	ARL13B_KAN602-5_4.tif:0009-0312	3.744	368.924	105	889	89.377	50.229	0.393	1381.33	53125	3.961	0.252	0.696	1.0013
1004	ARL13B_KAN602-5_4.tif:0010-0315	3.354	288.69	87	723	14.206	50.652	0.335	968.324	37241	3.694	0.271	0.582	0.701916
1005	ARL13B_KAN602-5_4.tif:0011-0335	3.198	330.659	86	793	194.766	54.245	0.398	1057.51	40671	4.553	0.22	0.799	0.766565
1006	ARL13B_KAN602-5_4.tif:0012-0434	3.432	396.386	13	1268	40.496	70.113	0.575	1360.48	52323	2.269	0.441	0.756	0.986181
1007	ARL13B_KAN602-5_4.tif:0013-0442	1.196	212.109	96	415	152.318	71.227	0.327	253.697	9757	5.422	0.184	0.586	0.183899
1008	ARL13B_KAN602-5_4.tif:0014-0463	3.25	292.296	50	607	183.339	74.591	0.323	950.019	36537	5.707	0.175	0.668	0.688648
1009	ARL13B_KAN602-5_4.tif:0015-0495	3.12	443.733	60	1857	131.057	79.964	0.383	1384.53	53248	3.882	0.258	0.608	1.00362
1010	ARL13B_KAN602-5_4.tif:0016-0490	2.34	308.533	20	677	14.194	78.927	0.343	722.011	27768	3.927	0.255	0.682	0.52337
1011	ARL13B_KAN602-5_4.tif:0017-0520	3.042	473.769	25	1369	159.157	83.833	0.599	1441.29	55431	3.006	0.333	0.863	1.04476
1012	ARL13B_KAN602-5_4.tif:0018-0527	2.834	375.908	128	1109	82.66	84.978	0.549	1065.39	40974	3.374	0.296	0.781	0.772276
1013	ARL13B_KAN602-5_4.tif:0019-0631	2.938	315.752	80	1080	36.328	101.608	0.36	927.736	35680	4.871	0.205	0.648	0.672495
1014	ARL13B_KAN602-5_4.tif:0020-0735	3.042	305.658	24	754	188.454	118.617	0.29	929.868	35762	6.218	0.161	0.626	0.67404
1015	ARL13B_KAN602-5_4.tif:0021-0761	2.86	894.964	121	2573	70.494	122.987	0.522	2559.75	98446	3.356	0.298	0.761	1.85551
1016	ARL13B_KAN602-5_4.tif:0022-0774	2.782	464.402	89	1283	222.337	124.92	0.405	1292.04	49691	3.738	0.268	0.652	0.936573
1017	ARL13B_KAN602-5_4.tif:0023-0779	2.288	384.307	73	1154	127.88	125.656	0.543	879.347	33819	2.884	0.347	0.733	0.637419
1018	ARL13B_KAN602-5_4.tif:0024-0834	2.47	220.853	57	477	164.754	134.624	0.184	545.539	20981	8.533	0.117	0.499	0.395449
1019	ARL13B_KAN602-5_4.tif:0025-0875	3.484	331.149	131	998	206.923	141.076	0.508	1153.79	44374	3.673	0.272	0.791	0.836359
1020	ARL13B_KAN602-5_4.tif:0026-0899	3.042	280.47	34	636	142.052	144.926	0.331	853.241	32815	5.847	0.171	0.731	0.618495
1021	ARL13B_KAN602-5_4.tif:0027-0901	2.834	244.037	119	589	92.625	145.362	0.496	691.642	26600	3.524	0.284	0.781	0.501355
1022	ARL13B_KAN602-5_5.tif:0001-0016	2.496	268.271	46	531	25.383	2.409	0.279	669.644	25754	4.688	0.213	0.58	0.48541
1023	ARL13B_KAN602-5_5.tif:0002-0009	2.652	310.657	49	609	74.624	1.203	0.37	823.912	31687	4.309	0.232	0.66	0.597235
1024	ARL13B_KAN602-5_5.tif:0003-0036	2.106	243.617	132	462	3.186	5.824	0.315	513.089	19733	4.192	0.239	0.568	0.371927
1025	ARL13B_KAN602-5_5.tif:0004-0142	3.562	365.701	131	827	206.403	22.917	0.272	1302.7	50101	8.067	0.124	0.703	0.944301
1026	ARL13B_KAN602-5_5.tif:0005-0161	5.174	249.96	2	683	164.032	25.904	0.249	1293.37	49742	6.274	0.159	0.606	0.937535
1027	ARL13B_KAN602-5_5.tif:0006-0157	4.394	383.509	97	1035	39.735	25.072	0.158	1685.24	64813	6.469	0.155	0.404	1.22159
1028	ARL13B_KAN602-5_5.tif:0007-0154	2.08	320.238	73	1025	103.678	25.012	0.524	666.134	25619	3.251	0.308	0.737	0.482866
1029	ARL13B_KAN602-5_5.tif:0008-0275	3.146	270.975	45	768	198.367	44.378	0.42	852.539	32788	5.646	0.177	0.861	0.617987
1030	ARL13B_KAN602-5_5.tif:0009-0292	3.12	398.475	65	1650	80.358	46.952	0.37	1243.32	47817	4.899	0.204	0.729	0.901252
1031	ARL13B_KAN602-5_5.tif:0010-0328	3.25	359.152	88	863	213.729	52.99	0.345	1167.31	44894	5.205	0.192	0.667	0.84616
1032	ARL13B_KAN602-5_5.tif:0011-0356	3.744	309.368	70	864	131.469	57.33	0.316	1158.34	44549	5.095	0.196	0.694	0.839657
1033	ARL13B_KAN602-5_5.tif:0012-0474	4.134	415.075	92	1620	108.544	76.361	0.412	1716.03	65997	4.805	0.208	0.785	1.24391
1034	ARL13B_KAN602-5_5.tif:0013-0498	2.236	362.651	60	1109	89.447	80.391	0.395	810.937	31188	4.965	0.201	0.72	0.58783
1035	ARL13B_KAN602-5_5.tif:0014-0547	4.264	338.384	11	870	156.738	88.528	0.341	1442.96	55495	2.77	0.361	0.594	1.04597
1036	ARL13B_KAN602-5_5.tif:0015-0578	3.952	745.645	137	2441	72.917	93.309	0.465	2946.97	113338	4.23	0.236	0.802	2.13619
1037	ARL13B_KAN602-5_5.tif:0016-0575	3.354	311.628	116	913	195.361	92.969	0.292	1045.26	40200	5.418	0.185	0.58	0.757688
1038	ARL13B_KAN602-5_5.tif:0017-0622	2.99	540.304	80	1365	42.794	100.207	0.423	1615.61	62135	4.155	0.241	0.682	1.17112
1039	ARL13B_KAN602-5_5.tif:0018-0620	2.054	257.557	43	774	51.009	99.99	0.546	529.054	20347	2.98	0.336	0.782	0.383499
1040	ARL13B_KAN602-5_5.tif:0019-0687	2.86	469.991	0	1484	165.916	110.631	0.392	1344.26	51699	3.246	0.308	0.595	0.97442
1041	ARL13B_KAN602-5_5.tif:0020-0736	2.366	369.154	116	926	220.369	118.755	0.334	873.471	33593	5.84	0.171	0.74	0.633159
1042	ARL13B_KAN602-5_5.tif:0021-0750	2.99	425.357	111	1530	135.121	120.923	0.432	1271.89	48916	4.548	0.22	0.717	0.921966
1043	ARL13B_KAN602-5_5.tif:0022-0942	2.782	267.692	70	736	208.052	152.037	0.268	744.763	28643	5.834	0.171	0.559	0.539862
1044	ARL13B_KAN602-5_5.tif:0023-0991	2.418	730.161	81	2276	85.88	159.687	0.527	1765.64	67905	2.995	0.334	0.724	1.27987
1045	ARL13B_KAN602-5_5.tif:0024-1002	2.678	542.893	75	1768	60.031	161.515	0.37	1453.96	55918	4.921	0.203	0.71	1.05394
1046	ARL13B_KAN602-5_6.tif:0001-0007	1.378	420.736	85	1111	215.748	1.085	0.343	579.809	22299	5.166	0.194	0.684	0.42029
1047	ARL13B_KAN602-5_6.tif:0002-0042	4.134	302.862	126	549	51.765	6.639	0.58	1252.11	48155	2.854	0.35	0.799	0.907623
1048	ARL13B_KAN602-5_6.tif:0003-0116	3.874	242.611	60	466	62.074	18.7	0.509	939.931	36149	4.001	0.25	0.861	0.681335
1049	ARL13B_KAN602-5_6.tif:0004-0178	2.47	568.126	0	2260	216.682	28.691	0.599	1403.36	53972	2.206	0.453	0.772	1.01726
1050	ARL13B_KAN602-5_6.tif:0005-0194	1.768	570.574	51	1630	175.736	31.586	0.42	1008.84	38799	3.826	0.261	0.723	0.731282
1051	ARL13B_KAN602-5_6.tif:0006-0252	1.976	422.224	105	1277	115.406	40.896	0.5	834.364	32089	2.964	0.337	0.694	0.604812
1052	ARL13B_KAN602-5_6.tif:0007-0321	3.588	545.123	114	1962	187.161	51.755	0.39	1956.02	75227	5.276	0.19	0.687	1.41787
1053	ARL13B_KAN602-5_6.tif:0008-0335	4.394	409.479	37	1153	38.654	53.957	0.433	1799.36	69202	4.372	0.229	0.828	1.30432
1054	ARL13B_KAN602-5_6.tif:0009-0353	2.938	263.77	126	535	206.675	57.117	0.442	775.003	29806	4.735	0.211	0.751	0.561782
1055	ARL13B_KAN602-5_6.tif:0010-0367	4.316	358.789	105	728	117.45	58.984	0.344	1548.63	59559	3.26	0.307	0.582	1.12257
1056	ARL13B_KAN602-5_6.tif:0011-0437	2.21	323.835	131	1304	144.568	70.482	0.438	715.719	27526	3.95	0.253	0.672	0.518809
1057	ARL13B_KAN602-5_6.tif:0012-0462	3.328	222.828	75	499	72.271	74.69	0.402	741.617	28522	4.544	0.22	0.686	0.537581
1058	ARL13B_KAN602-5_6.tif:0013-0522	4.732	278.159	39	810	127.992	84.552	0.247	1316.33	50625	5.683	0.176	0.552	0.954177
1059	ARL13B_KAN602-5_6.tif:0014-0542	2.34	300.389	20	811	204.401	87.378	0.441	702.952	27035	2.993	0.334	0.735	0.509554
1060	ARL13B_KAN602-5_6.tif:0015-0588	3.952	534.743	17	1851	48.989	94.734	0.379	2113.43	81281	4.34	0.23	0.679	1.53198
1061	ARL13B_KAN602-5_6.tif:0016-0601	2.626	195.832	36	355	117.843	97.03	0.336	514.285	19779	4.915	0.203	0.635	0.372794
1062	ARL13B_KAN602-5_6.tif:0017-0612	2.366	341.912	135	845	18.493	98.759	0.39	809.013	31114	5.462	0.183	0.7	0.586435
1063	ARL13B_KAN602-5_6.tif:0018-0747	5.954	330.563	88	745	159.163	120.275	0.301	1968.29	75699	4.478	0.223	0.613	1.42677
1064	ARL13B_KAN602-5_6.tif:0019-0772	2.496	285.354	7	1120	20.805	124.673	0.323	712.287	27394	4.198	0.238	0.585	0.516321
1065	ARL13B_KAN602-5_6.tif:0020-0794	2.704	238.558	55	836	200.663	128.143	0.411	645.099	24810	4.834	0.207	0.819	0.467618
1066	ARL13B_KAN602-5_6.tif:0021-0827	3.64	335.521	108	745	120.53	133.357	0.38	1221.37	46973	5.075	0.197	0.722	0.885345
1067	ARL13B_KAN602-5_6.tif:0022-0849	2.782	411.393	95	1373	171.149	136.891	0.419	1144.56	44019	3.71	0.27	0.702	0.829668
1068	ARL13B_KAN602-5_6.tif:0023-0972	4.004	320.779	123	870	74.122	156.806	0.301	1284.48	49400	6.884	0.145	0.632	0.931089
1069	ARL13B_KAN602-5_6.tif:0024-0965	2.262	266.207	98	755	28.955	155.642	0.359	602.196	23160	4.98	0.201	0.713	0.436519
1070	ARL13B_KAN602-5_6.tif:0025-1010	2.132	310.939	70	636	222.641	163.028	0.37	662.962	25497	4.498	0.222	0.621	0.480566
										43544				0.820714
1071	ARL13B_KAN602-6_1.tif:0001-0023	2.132	313	7	907	49.457	3.664	0.342	667.356	25666	4.03	0.248	0.61	0.483751
1072	ARL13B_KAN602-6_1.tif:0002-0042	2.054	169.063	17	294	197.21	6.788	0.578	347.277	13356	2.464	0.406	0.775	0.251733
1073	ARL13B_KAN602-6_1.tif:0003-0072	1.95	177.56	104	273	3.357	11.62	0.449	346.263	13317	3.732	0.268	0.708	0.250998
1074	ARL13B_KAN602-6_1.tif:0004-0089	2.574	314.626	127	699	16.626	14.359	0.385	809.897	31148	5.45	0.183	0.773	0.587076
1075	ARL13B_KAN602-6_1.tif:0005-0090	2.444	314.255	89	747	212.114	14.538	0.493	768.086	29540	4.259	0.235	0.828	0.556768
1076	ARL13B_KAN602-6_1.tif:0006-0109	2.184	281.107	86	577	36.658	17.588	0.486	613.975	23613	3.807	0.263	0.785	0.445057
1077	ARL13B_KAN602-6_1.tif:0007-0169	1.82	491.929	90	1450	130.039	27.26	0.468	895.364	34435	4.177	0.239	0.761	0.649029
1078	ARL13B_KAN602-6_1.tif:0008-0176	3.458	457.406	92	1121	37.323	28.508	0.46	1581.81	60835	3.345	0.299	0.709	1.14662
1079	ARL13B_KAN602-6_1.tif:0009-0276	2.756	644.349	73	1904	200.166	44.659	0.547	1775.93	68301	3.161	0.316	0.794	1.28733
1080	ARL13B_KAN602-6_1.tif:0010-0295	2.418	281.333	60	706	52.653	47.551	0.247	680.305	26164	7.649	0.131	0.56	0.493138
1081	ARL13B_KAN602-6_1.tif:0011-0297	1.976	379.618	112	722	45.057	47.966	0.498	750.171	28851	3.989	0.251	0.784	0.543782
1082	ARL13B_KAN602-6_1.tif:0012-0378	1.846	236.352	123	454	37.189	61.02	0.57	436.332	16781	3.268	0.306	0.835	0.316287
1083	ARL13B_KAN602-6_1.tif:0013-0451	3.25	491.192	69	1598	84.81	72.797	0.405	1596.47	61399	3.693	0.271	0.638	1.15725
1084	ARL13B_KAN602-6_1.tif:0014-0508	3.068	281.669	95	725	41.462	82.216	0.322	864.214	33237	4.194	0.238	0.578	0.626449
1085	ARL13B_KAN602-6_1.tif:0015-0523	2.964	212.991	89	360	210.235	84.256	0.526	631.344	24281	3.183	0.314	0.781	0.457647
1086	ARL13B_KAN602-6_1.tif:0016-0530	1.716	181.636	104	292	85.367	85.572	0.475	311.707	11988	3.834	0.261	0.754	0.225949
1087	ARL13B_KAN602-6_1.tif:0017-0626	1.872	205.833	11	439	98.795	101.117	0.242	385.343	14820	4.947	0.202	0.466	0.279327
1088	ARL13B_KAN602-6_1.tif:0018-0644	1.612	444.403	58	1145	26.588	104.019	0.404	716.421	27553	4.416	0.226	0.713	0.519318
1089	ARL13B_KAN602-6_1.tif:0019-0669	4.03	346.452	40	811	154.692	108.017	0.597	1396.28	53700	2.606	0.384	0.807	1.01213
1090	ARL13B_KAN602-6_1.tif:0020-0673	2.34	285.089	121	1013	11.64	108.478	0.427	667.148	25658	4.603	0.217	0.714	0.483601
1091	ARL13B_KAN602-6_1.tif:0021-0712	3.302	480.52	27	1232	213.694	114.93	0.363	1586.77	61026	5.181	0.193	0.681	1.15021
1092	ARL13B_KAN602-6_1.tif:0022-0831	1.716	260.682	80	465	48.045	134.096	0.432	447.357	17205	4.795	0.209	0.759	0.324279
1093	ARL13B_KAN602-6_1.tif:0023-0843	2.756	382.009	104	1135	55.761	135.89	0.52	1052.88	40493	3.563	0.281	0.809	0.76321
1094	ARL13B_KAN602-6_1.tif:0024-0867	2.184	485.286	113	1445	107.972	139.827	0.513	1059.93	40764	3.481	0.287	0.747	0.768318
1095	ARL13B_KAN602-6_1.tif:0025-0881	1.69	229.738	79	656	162.807	141.752	0.363	388.281	14933	4.235	0.236	0.634	0.281456
1096	ARL13B_KAN602-6_1.tif:0026-1012	2.704	319.769	123	664	211.323	163.045	0.574	864.708	33256	2.453	0.408	0.74	0.626807
1097	ARL13B_KAN602-6_2.tif:0001-0011	1.586	263.443	135	442	131.756	1.783	0.434	417.845	16070	4.331	0.231	0.709	0.302887
1098	ARL13B_KAN602-6_2.tif:0002-0034	2.418	244.484	21	553	111.709	5.454	0.352	591.198	22737	4.065	0.246	0.608	0.428546
1099	ARL13B_KAN602-6_2.tif:0003-0049	1.56	253.183	110	738	149.385	7.987	0.508	394.99	15191	3.989	0.251	0.723	0.286319
1100	ARL13B_KAN602-6_2.tif:0004-0081	2.444	487.138	43	1352	140.336	12.977	0.495	1190.64	45791	3.479	0.287	0.755	0.863066
1101	ARL13B_KAN602-6_2.tif:0005-0100	1.482	164.404	38	311	111.233	15.965	0.217	243.661	9371	7.032	0.142	0.502	0.176624
1102	ARL13B_KAN602-6_2.tif:0006-0093	2.86	259.655	70	529	168.093	15.05	0.539	742.657	28562	2.965	0.337	0.797	0.538335
1103	ARL13B_KAN602-6_2.tif:0007-0178	1.534	240.254	95	462	9.417	28.731	0.535	368.572	14175	3.172	0.315	0.792	0.26717
1104	ARL13B_KAN602-6_2.tif:0008-0178	2.834	288.083	44	579	22.777	28.756	0.373	816.475	31401	4.951	0.202	0.744	0.591844
1105	ARL13B_KAN602-6_2.tif:0009-0325	3.172	275.131	41	722	103.318	52.437	0.291	872.769	33566	6.27	0.159	0.604	0.63265
1106	ARL13B_KAN602-6_2.tif:0010-0327	2.496	418.688	25	1703	191.753	52.848	0.533	1045.11	40194	3.675	0.272	0.835	0.757574
1107	ARL13B_KAN602-6_2.tif:0011-0331	2.444	516.798	50	1537	125.444	53.334	0.406	1263.13	48579	4.435	0.225	0.681	0.915615
1108	ARL13B_KAN602-6_2.tif:0012-0442	4.16	356.781	129	892	37.152	71.332	0.432	1484.3	57085	4.626	0.216	0.796	1.07594
1109	ARL13B_KAN602-6_2.tif:0013-0466	3.77	348.034	137	735	80.021	75.142	0.499	1312.17	50465	3.954	0.253	0.845	0.951162
1110	ARL13B_KAN602-6_2.tif:0014-0470	1.742	169.806	23	307	113.348	75.895	0.451	295.82	11377	2.101	0.476	0.623	0.214433
1111	ARL13B_KAN602-6_2.tif:0015-0584	2.6	222.24	56	484	88.757	94.284	0.507	577.859	22224	3.527	0.283	0.784	0.418877
1112	ARL13B_KAN602-6_2.tif:0016-0680	3.692	619.866	59	1816	169.182	109.719	0.413	2288.68	88021	5.144	0.194	0.755	1.65902
1113	ARL13B_KAN602-6_2.tif:0017-0796	4.316	307.428	41	616	130.063	128.315	0.401	1326.94	51033	4.466	0.224	0.736	0.961867
1114	ARL13B_KAN602-6_2.tif:0018-0941	3.198	462.211	77	1777	196.5	151.726	0.467	1478.24	56852	4.985	0.201	0.891	1.07154
1115	ARL13B_KAN602-6_2.tif:0019-0946	2.99	308.383	55	761	37.425	152.545	0.402	922.12	35464	4.81	0.208	0.717	0.668424
1116	ARL13B_KAN602-6_2.tif:0020-0992	2.886	292.577	41	836	80.024	159.916	0.346	844.427	32476	6.17	0.162	0.705	0.612106
1117	ARL13B_KAN602-6_2.tif:0021-1022	1.794	297.855	22	693	28.22	164.712	0.454	534.384	20552	3.445	0.29	0.667	0.387363
1118	ARL13B_KAN602-6_3.tif:0001-0022	3.094	450.294	32	1963	164.445	3.634	0.54	1393.29	53585	3.518	0.284	0.778	1.00997
1119	ARL13B_KAN602-6_3.tif:0002-0076	3.12	286.458	121	604	207.282	12.191	0.554	893.804	34375	3.294	0.304	0.784	0.647898
1120	ARL13B_KAN602-6_3.tif:0003-0119	2.886	288.324	111	543	57.949	19.29	0.539	832.154	32004	2.674	0.374	0.753	0.60321
1121	ARL13B_KAN602-6_3.tif:0004-0162	2.652	372.843	64	851	178.791	26.029	0.592	988.84	38030	2.741	0.365	0.794	0.716788
1122	ARL13B_KAN602-6_3.tif:0005-0179	2.34	325.233	11	958	82.039	28.926	0.495	761.092	29271	3.489	0.287	0.766	0.551698
1123	ARL13B_KAN602-6_3.tif:0006-0275	3.172	321.779	3	780	79.815	44.333	0.323	1020.74	39257	5.3	0.189	0.676	0.739914
1124	ARL13B_KAN602-6_3.tif:0007-0307	4.03	313.452	57	936	157.17	49.499	0.484	1263.29	48585	3.988	0.251	0.787	0.915728
1125	ARL13B_KAN602-6_3.tif:0008-0381	3.926	581.629	14	2622	41.255	61.467	0.446	2283.61	87826	3.996	0.25	0.711	1.65534
1126	ARL13B_KAN602-6_3.tif:0009-0385	4.186	388.224	105	1546	181.674	61.877	0.498	1625.2	62504	3.529	0.283	0.727	1.17807
1127	ARL13B_KAN602-6_3.tif:0010-0424	4.368	669.19	69	2383	86.706	68.363	0.42	2923.2	112424	5.058	0.198	0.812	2.11896
1128	ARL13B_KAN602-6_3.tif:0011-0429	2.782	568.944	74	1891	103.531	69.276	0.402	1582.9	60877	5.412	0.185	0.775	1.14741
1129	ARL13B_KAN602-6_3.tif:0012-0600	4.03	324.484	89	1028	140.224	97.047	0.425	1307.75	50295	3.899	0.256	0.719	0.947958
1130	ARL13B_KAN602-6_3.tif:0013-0656	2.47	381.768	98	825	203.629	105.883	0.523	943.025	36268	3.065	0.326	0.802	0.683577
1131	ARL13B_KAN602-6_3.tif:0014-0691	2.678	492.194	114	2174	57.296	111.49	0.595	1318.17	50696	3.153	0.317	0.821	0.955516
1132	ARL13B_KAN602-6_3.tif:0015-0736	2.444	314.989	26	1384	11.687	118.701	0.365	769.88	29609	2.043	0.489	0.575	0.558069
1133	ARL13B_KAN602-6_3.tif:0016-0766	2.366	424.758	40	1166	29.892	123.616	0.413	1005.04	38653	3.144	0.318	0.655	0.72853
1134	ARL13B_KAN602-6_3.tif:0017-0788	3.614	359.058	119	1155	74.622	127.183	0.377	1297.71	49909	5.408	0.185	0.713	0.940682
1135	ARL13B_KAN602-6_3.tif:0018-0802	4.004	419.87	75	1381	179.874	129.498	0.45	1681.26	64660	4.206	0.238	0.764	1.21871
1136	ARL13B_KAN602-6_3.tif:0019-0892	1.456	221.375	45	493	21.587	144.014	0.387	322.341	12397	2.845	0.352	0.583	0.233658
1137	ARL13B_KAN602-6_3.tif:0020-0945	2.262	239.851	107	427	22.898	152.341	0.456	542.575	20867	4.229	0.236	0.837	0.3933
1138	ARL13B_KAN602-6_3.tif:0021-0955	2.834	433.688	48	1022	75.492	154.058	0.367	1229.15	47272	6.085	0.164	0.762	0.89098
1139	ARL13B_KAN602-6_3.tif:0022-0992	2.418	255.151	2	711	114.28	160.058	0.393	616.991	23729	3.642	0.275	0.598	0.447243
1140	ARL13B_KAN602-6_4.tif:0001-0075	1.768	191.191	79	318	213.5	12.11	0.598	338.046	13001	2.731	0.366	0.795	0.245042
1141	ARL13B_KAN602-6_4.tif:0002-0085	2.496	517.438	103	1759	82.466	13.857	0.528	1291.6	49674	3.001	0.333	0.771	0.936253
1142	ARL13B_KAN602-6_4.tif:0003-0169	2.132	262.793	95	793	44.165	27.281	0.469	560.308	21549	2.887	0.346	0.648	0.406154
1143	ARL13B_KAN602-6_4.tif:0004-0172	3.224	490.492	96	1408	152.71	27.768	0.502	1581.44	60821	3.774	0.265	0.787	1.14635
1144	ARL13B_KAN602-6_4.tif:0005-0261	3.146	519.545	25	1853	139.499	42.186	0.49	1634.59	62865	2.912	0.343	0.722	1.18488
1145	ARL13B_KAN602-6_4.tif:0006-0283	2.704	330.25	81	747	67.753	45.561	0.402	893.05	34346	4.782	0.209	0.686	0.647352
1146	ARL13B_KAN602-6_4.tif:0007-0327	3.562	167.971	0	329	38.949	52.747	0.498	598.348	23012	2.066	0.484	0.667	0.433729
1147	ARL13B_KAN602-6_4.tif:0008-0335	3.77	588.724	36	2500	196.93	53.967	0.413	2219.62	85365	4.044	0.247	0.656	1.60896
1148	ARL13B_KAN602-6_4.tif:0009-0444	3.458	554.917	133	1770	139.901	71.522	0.386	1919.02	73804	4.354	0.23	0.619	1.39105
1149	ARL13B_KAN602-6_4.tif:0010-0528	2.392	309.609	46	796	47.562	85.126	0.58	740.629	28484	1.904	0.525	0.745	0.536865
1150	ARL13B_KAN602-6_4.tif:0011-0592	2.47	521.126	38	1651	87.184	95.519	0.557	1287.26	49507	2.243	0.446	0.734	0.933105
1151	ARL13B_KAN602-6_4.tif:0012-0599	3.068	415.441	30	930	45.14	96.545	0.28	1274.65	49022	6.383	0.157	0.618	0.923964
1152	ARL13B_KAN602-6_4.tif:0013-0628	2.808	412.694	85	1180	126.686	101.392	0.362	1158.92	44571	5.383	0.186	0.73	0.840072
1153	ARL13B_KAN602-6_4.tif:0014-0645	2.626	341.337	126	1188	212.966	104.053	0.556	896.404	34475	3.564	0.281	0.811	0.649783
1154	ARL13B_KAN602-6_4.tif:0015-0666	4.446	387.17	12	1085	84.694	107.632	0.307	1721.46	66206	7.103	0.141	0.679	1.24785
1155	ARL13B_KAN602-6_4.tif:0016-0690	3.51	431.963	0	2689	167.357	111.122	0.485	1516.28	58315	1.859	0.538	0.696	1.09912
1156	ARL13B_KAN602-6_4.tif:0017-0720	2.626	560.139	60	1628	185.587	116.142	0.44	1471.01	56574	3.057	0.327	0.673	1.0663
1157	ARL13B_KAN602-6_4.tif:0018-0845	1.768	279.132	63	765	177.271	136.47	0.403	493.536	18981	3.138	0.319	0.607	0.357753
1158	ARL13B_KAN602-6_4.tif:0019-0869	2.86	326.2	40	1310	82.605	140.059	0.323	932.988	35882	4.031	0.248	0.599	0.676302
1159	ARL13B_KAN602-6_4.tif:0020-0898	3.146	262.826	101	516	178.623	144.828	0.567	826.902	31802	3.535	0.283	0.893	0.599402
1160	ARL13B_KAN602-6_4.tif:0021-0976	1.378	170.321	27	351	71.651	157.625	0.439	234.716	9027	4.017	0.249	0.774	0.17014
1161	ARL13B_KAN602-6_4.tif:0022-1033	1.898	354.055	88	1362	161.529	166.535	0.597	672.036	25846	2.801	0.357	0.785	0.487144
[truncated: 1,058 more rows]

## Sheet: IF condition
Exp. number	Cell line	Culture condition	Fixation condition	rabbit-Alexa488	mouse IgG1-Alexa568	mouse IgG2b-Alexa647	Nuclear stain	Date	Replicate
[truncated: 42 more rows]

[truncated: 2 more sheets: Total analysis, Statistics]
