# Supplementary material for: A hierarchical pathway for assembly of the distal appendages that organize primary cilia
Source: eLife. 2025 Jan 30;14:e85999. doi: 10.7554/eLife.85999 (PMC11984956; doi:10.7554/eLife.85999)
Supplement: Figure 5—source data 1. [file elife-85999-fig5-data1.xlsx]

## Sheet: Raw data
sgGFP (pMCB306)				CEP164 KO				CEP83 KO				SCLT1 KO				FBF1 KO				CEP89 KO				CCDC92 KO				ANKRD26 KO				TTBK2 KO				INPP5E KO				KIZ KO				LRRC45 KO				sgSafe
	Ciliated	cell counts	ARL13B+ Ac-Tub- dot		Ciliated	cell counts	ARL13B+ Ac-Tub- dot		Ciliated	cell counts	ARL13B+ Ac-Tub- dot		Ciliated	cell counts	ARL13B+ Ac-Tub- dot		Ciliated	cell counts			Ciliated	cell counts	ARL13B+ Ac-Tub- dot		Ciliated	cell counts	ARL13B+ Ac-Tub- dot		Ciliated	cell counts	ARL13B+ Ac-Tub- dot		Ciliated	cell counts	ARL13B+ Ac-Tub- dot		Ciliated	cell counts			Ciliated	cell counts	ARL13B+ Ac-Tub- dot
KAN546-1	34	41		KAN546-2	0	32		KAN546-3	0	48		KAN546-4	1	56		KAN546-5	21	43		KAN546-6	26	50		KAN546-7	35	48		KAN546-8	12	39		KAN546-9	0	44		KAN546-10	33	41		KAN546-11	38	48
2	36	44		2	0	38		2	0	40		2	1	48		2	13	33		2	20	40		2	35	44		2	22	41		2	0	44		2	35	46		2	25	33
3	34	42		3	0	36		3	0	37		3	3	50		3	12	32		3	18	44		3	33	53		3	13	43		3	0	32		3	35	45		3	34	45
4	33	39		4	0	36		4	0	56		4	0	36		4	8	27		4	21	43		4	28	42		4	17	46		4	0	37		4	41	46		4	41	47
5	49	54		5	0	35		5	0	37		5	0	49		5	14	34		5	22	47		5	16	33		5	11	36		5	0	32		5	33	36		5	23	30
6	32	36		6	0	35		6	0	47		6	0	41		6	14	32		6	22	39		6	25	40		6	17	44		6	0	46		6	37	43		6	26	43
7				7				7				7				7				7				7				7				7				7				7
8				8				8				8				8				8				8				8				8				8				8
9				9				9				9				9				9				9				9				9				9				9
10				10				10				10				10				10				10				10				10				10				10
	218	256	0		0	212	0		0	265	0		5	280	0		82	201			129	263	0		172	260	0		92	249	0		0	235	0		214	257			187	246	0
		85.1562				0				0				1.78571				40.796				49.0494				66.1538				36.9478				0				83.2685				76.0163
	Ciliated	cell counts	ARL13B+ Ac-Tub- dot		Ciliated	cell counts	ARL13B+ Ac-Tub- dot		Ciliated	cell counts	ARL13B+ Ac-Tub- dot		Ciliated	cell counts	ARL13B+ Ac-Tub- dot		Ciliated	cell counts	ARL13B+ Ac-Tub- dot		Ciliated	cell counts	ARL13B+ Ac-Tub- dot		Ciliated	cell counts	ARL13B+ Ac-Tub- dot		Ciliated	cell counts	ARL13B+ Ac-Tub- dot		Ciliated	cell counts	ARL13B+ Ac-Tub- dot		Ciliated	cell counts	ARL13B+ Ac-Tub- dot		Ciliated	cell counts	ARL13B+ Ac-Tub- dot
KAN565-1	30	38		KAN565-2	0	34		KAN565-3	0	40		KAN565-4	0	33		KAN565-5	16	30		KAN565-6	20	38		KAN565-7	15	28		KAN565-8	13	36		KAN565-9	0	38		KAN565-10	30	40		KAN565-11	23	34
2	23	30		2	0	40		2	0	37		2	0	26		2	19	39		2	17	39		2	23	39		2	14	40		2	0	33		2	27	37		2	28	32
3	29	39		3	0	37		3	0	31		3	0	28		3	25	37		3	18	38		3	25	42		3	7	31		3	0	44		3	25	35		3	24	26
4	35	38		4	0	38		4	0	52		4	1	37		4	14	32		4	20	33		4	13	30		4	7	39		4	0	36		4	36	41		4	27	34
5	33	37		5	0	38		5	0	37		5	1	39		5	12	34		5	21	40		5	26	33		5	18	47		5	0	33		5	22	34		5	33	41
6	32	38		6	0	36		6	0	41		6	0	37		6	20	35		6	15	35		6	21	37		6	12	37		6	0	43		6	34	42		6	13	27
7				7				7				7				7				7				7				7				7				7				7
8				8				8				8				8				8				8				8				8				8				8
9				9				9				9				9				9				9				9				9				9				9
10				10				10				10				10				10				10				10				10				10				10
	182	220	0		0	223	0		0	238	0		2	200	0		106	207	0		111	223	0		123	209	0		71	230	0		0	227	0		174	229	0		148	194	0
		82.7273				0				0				1				51.2077				49.7758				58.8517				30.8696				0				75.9825				76.2887
	Ciliated	cell counts	ARL13B+ Ac-Tub- dot		Ciliated	cell counts	ARL13B+ Ac-Tub- dot		Ciliated	cell counts	ARL13B+ Ac-Tub- dot		Ciliated	cell counts	ARL13B+ Ac-Tub- dot		Ciliated	cell counts	ARL13B+ Ac-Tub- dot		Ciliated	cell counts	ARL13B+ Ac-Tub- dot		Ciliated	cell counts	ARL13B+ Ac-Tub- dot		Ciliated	cell counts	ARL13B+ Ac-Tub- dot		Ciliated	cell counts	ARL13B+ Ac-Tub- dot		Ciliated	cell counts	ARL13B+ Ac-Tub- dot		Ciliated	cell counts	ARL13B+ Ac-Tub- dot
KAN566-1	29	32		KAN566-2	0	33		KAN566-3	0	38		KAN566-4	0	33		KAN566-5	18	40		KAN566-6	18	38		KAN566-7	23	45		KAN566-8	9	37		KAN566-9	0	43		KAN566-10	38	45		KAN566-11	37	42
2	18	27		2	0	24		2	0	46		2	1	37		2	11	33		2	16	36		2	17	36		2	16	35		2	0	40		2	30	36		2	33	39
3	26	29		3	0	29		3	0	33		3	0	33		3	12	35		3	18	41		3	17	36		3	9	37		3	0	35		3	28	35		3	32	35
4	23	28		4	0	31		4	0	33		4	3	40		4	18	36		4	13	32		4	16	38		4	15	44		4	0	32		4	29	36		4	16	28
5	23	30		5	0	29		5	0	35		5	0	40		5	20	34		5	16	33		5	20	32		5	11	44		5	0	36		5	33	40		5	28	32
6	30	36		6	0	28		6	0	38		6	0	34		6	19	34		6	13	34		6	19	37		6	16	39		6	0	40		6	24	34		6	37	41
7				7				7				7				7				7				7				7				7				7				7
8				8				8				8				8				8				8				8				8				8				8
9				9				9				9				9				9				9				9				9				9				9
10				10				10				10				10				10				10				10				10				10				10
	149	182	0		0	174	0		0	223	0		4	217	0		98	212	0		94	214	0		112	224	0		76	236	0		0	226	0		182	226	0		183	217	0
		81.8681				0				0				1.84332				46.2264				43.9252				50				32.2034				0				80.531				84.3318
	Ciliated	cell counts	ARL13B+ Ac-Tub- dot																																										Ciliated	cell counts	ARL13B+ Ac-Tub- dot		Ciliated
KAN647-1	44	53																																										KAN647-2	62	85		KAN647-5	70
2	46	57																																										2	69	86		2	53
3	48	56																																										3	65	83		3	52
4																																												4				4
5																																												5				5
6																																												6				6
7																																												7				7
8																																												8				8
9																																												9				9
10																																												10				10
	138	166	0																																										196	254	0		175
		83.1325																																												77.1654
	Ciliated	cell counts	ARL13B+ Ac-Tub- dot																																										Ciliated	cell counts	ARL13B+ Ac-Tub- dot		Ciliated
KAN647-11	77	93																																										KAN647-12	72	82		KAN582-15	72
2	60	75																																										2	66	71		2	78
3	47	59																																										3	78	91		3	65
4																																												4				4
5																																												5				5
6																																												6				6
7																																												7				7
8																																												8				8
9																																												9				9
10																																												10				10
	184	227	0																																										216	244	0		215
		81.0573																																												88.5246
	Ciliated	cell counts	ARL13B+dot																																										Ciliated	cell counts	ARL13B+dot		Ciliated
KAN672-1	53	60																																										KAN672-2	56	62		KAN672-5	76
2	54	67																																										2	56	69		2	50
3	49	65																																										3	72	88		3	55
4	60	77																																										4	79	94		4	36
5																																												5				5
6																																												6				6
7																																												7				7
8																																												8				8
9																																												9				9
10																																												10				10
	216	269	0																																										263	313	0		217
		80.2974																																												84.0256
					Ciliated	cell counts	ARL13B+dot		Ciliated	cell counts	ARL13B+dot		Ciliated	cell counts	ARL13B+dot		Ciliated	cell counts	ARL13B+dot		Ciliated	cell counts	ARL13B+dot		Ciliated	cell counts	ARL13B+dot		Ciliated	cell counts	ARL13B+ Ac-Tub- dot		Ciliated	cell counts	ARL13B+ Ac-Tub- dot		Ciliated	cell counts	ARL13B+ Ac-Tub- dot		Ciliated	cell counts	ARL13B+ Ac-Tub- dot		Ciliated	cell counts	ARL13B+ Ac-Tub- dot		Ciliated
				KAN694-2		14		KAN694-3		22		KAN694-4	1	27		KAN694-5	10	18		KAN694-6	12	34		KAN694-7	10	27		KAN694-8	10	26		KAN694-9	0	28		KAN694-10	17	24		KAN694-11	18	23		KAN694-12	18	24		KAN694-1	16
				2		21		2		23		2		19		2	6	22		2	6	21		2	12	24		2	7	28		2	0	30		2	9	19		2	16	25		2	22	27		2	21
				3		28		3		23		3		17		3	14	24		3	11	29		3	18	27		3	13	26		3	0	31		3	25	29		3	24	31		3	19	27		3	16
				4		28		4		27		4	1	28		4	5	18		4	13	24		4	16	30		4	8	20		4	0	23		4	24	29		4	20	27		4	15	22		4	15
				5		25		5		27		5		23		5	10	25		5	16	27		5	16	24		5	6	19		5	0	30		5	16	20		5	19	27		5	21	25		5	29
				6		23		6		32		6		24		6	10	23		6	12	25		6	15	25		6	3	17		6	0	24		6	11	24		6	17	23		6	22	26		6	21
				7		21		7		23		7	2	18		7	8	19		7	13	27		7	17	34		7	10	24		7	0	20		7	8	21		7	23	28		7	23	27		7	13
				8		21		8		21		8		20		8	14	30		8	16	30		8	16	22		8	12	27		8	0	31		8	20	29		8	16	22		8	23	30		8	18
				9				9				9				9				9				9	13	25		9				9				9				9	30	33		9				9
				10				10				10				10				10				10	17	30		10				10				10				10				10				10
					0	181	0		0	198	0		4	176	0		77	179	0		99	217	0		150	268	0		69	187	0		0	217	0		130	195	0		183	239	0		163	208	0		149
						0				0				2.27273				43.0168				45.6221				55.9701				36.8984				0				66.6667				76.569				78.3654
					Ciliated	cell counts	ARL13B+dot		Ciliated	cell counts	ARL13B+dot		Ciliated	cell counts	ARL13B+dot		Ciliated	cell counts	ARL13B+dot		Ciliated	cell counts	ARL13B+dot		Ciliated	cell counts	ARL13B+dot		Ciliated	cell counts	ARL13B+ Ac-Tub- dot		Ciliated	cell counts	ARL13B+ Ac-Tub- dot		Ciliated	cell counts	ARL13B+ Ac-Tub- dot		Ciliated	cell counts	ARL13B+ Ac-Tub- dot		Ciliated	cell counts	ARL13B+ Ac-Tub- dot		Ciliated
				KAN700-2	0	27		KAN700-3	0	30		KAN700-4	0	23		KAN700-5	7	15		KAN700-6	18	27		KAN700-7	17	35		KAN700-8	13	28		KAN700-9	0	20		KAN700-10	17	22		KAN700-11	22	28		KAN700-12	20	26		KAN700-1	11
				2	0	19		2	0	29		2	0	23		2	9	23		2	5	17		2	13	27		2	11	26		2	0	32		2	19	27		2	11	20		2	21	28		2	23
				3	0	22		3	0	29		3	0	19		3	8	20		3	15	24		3	14	26		3	2	21		3	0	21		3	24	29		3	14	24		3	20	26		3	23
				4	0	20		4	0	31		4	0	21		4	6	22		4	9	22		4	21	40		4	11	26		4	0	30		4	28	36		4	20	25		4	17	24		4	22
				5	0	26		5	0	30		5	1	21		5	12	24		5	8	21		5	12	23		5	14	30		5	0	30		5	18	26		5	19	26		5	27	31		5	18
				6	0	25		6	0	28		6	0	23		6	12	18		6	19	31		6	19	33		6	8	27		6	0	24		6	24	32		6	21	28		6	25	29		6	22
				7	0	27		7	0	26		7	0	20		7	6	17		7	18	28		7	14	23		7	6	31		7	0	24		7	23	32		7	28	34		7	17	26		7	19
				8	0	21		8	0	29		8	1	23		8	11	25		8	11	19		8				8	8	25		8	0	26		8	12	23		8	24	30		8	17	24		8	24
				9				9				9				9				9				9				9				9				9				9				9				9
				10				10				10				10				10				10				10				10				10				10				10				10
					0	187	0		0	232	0		2	173	0		71	164	0		103	189	0		110	207	0		73	214	0		0	207	0		165	227	0		159	215	0		164	214	0		162
						0				0				1.15607				43.2927				54.4974				53.1401				34.1121				0				72.6872				73.9535				76.6355
[truncated: 2 more columns]

## Sheet: IF condition
Exp. number	Cell line	Culture condition	Fixation condition	rabbit-Alexa488	mouse IgG1-Alexa568	mouse IgG2b-Alexa647	Nuclear stain	Date	Replicate
Exp.1
KAN546-1	RPE-BFP-Cas9 pMCB306 (pool)	Serum starved for 24 hours	Fixed in 4% PFA at RT for 15 minutes.	ARL13B, Proteintech, 17711-1-AP, 1:1000	CEP170, Invitrogen, 41-3200, 1:1000	Ac-Tub, 6B-11, Santa Cruz, 1:1000	DAPI	2020-10-16	No.1
KAN546-2	RPE-BFP-Cas9 CEP164KO (pool)	Serum starved for 24 hours	Fixed in 4% PFA at RT for 15 minutes.	ARL13B, Proteintech, 17711-1-AP, 1:1000	CEP170, Invitrogen, 41-3200, 1:1000	Ac-Tub, 6B-11, Santa Cruz, 1:1000	DAPI	2020-10-16	No.1
KAN546-3	RPE-BFP-Cas9 CEP83 KO (pool)	Serum starved for 24 hours	Fixed in 4% PFA at RT for 15 minutes.	ARL13B, Proteintech, 17711-1-AP, 1:1000	CEP170, Invitrogen, 41-3200, 1:1000	Ac-Tub, 6B-11, Santa Cruz, 1:1000	DAPI	2020-10-16	No.1
KAN546-4	RPE-BFP-Cas9 SCLT1 KO (pool)	Serum starved for 24 hours	Fixed in 4% PFA at RT for 15 minutes.	ARL13B, Proteintech, 17711-1-AP, 1:1000	CEP170, Invitrogen, 41-3200, 1:1000	Ac-Tub, 6B-11, Santa Cruz, 1:1000	DAPI	2020-10-16	No.1
KAN546-5	RPE-BFP-Cas9 FBF1 KO (pool)	Serum starved for 24 hours	Fixed in 4% PFA at RT for 15 minutes.	ARL13B, Proteintech, 17711-1-AP, 1:1000	CEP170, Invitrogen, 41-3200, 1:1000	Ac-Tub, 6B-11, Santa Cruz, 1:1000	DAPI	2020-10-16	No.1
KAN546-6	RPE-BFP-Cas9 CEP89KO (pool)	Serum starved for 24 hours	Fixed in 4% PFA at RT for 15 minutes.	ARL13B, Proteintech, 17711-1-AP, 1:1000	CEP170, Invitrogen, 41-3200, 1:1000	Ac-Tub, 6B-11, Santa Cruz, 1:1000	DAPI	2020-10-16	No.1
KAN546-7	RPE-BFP-Cas9 CCDC92 KO (pool)	Serum starved for 24 hours	Fixed in 4% PFA at RT for 15 minutes.	ARL13B, Proteintech, 17711-1-AP, 1:1000	CEP170, Invitrogen, 41-3200, 1:1000	Ac-Tub, 6B-11, Santa Cruz, 1:1000	DAPI	2020-10-16	No.1
KAN546-8	RPE-BFP-Cas9 ANKRD26 KO (pool)	Serum starved for 24 hours	Fixed in 4% PFA at RT for 15 minutes.	ARL13B, Proteintech, 17711-1-AP, 1:1000	CEP170, Invitrogen, 41-3200, 1:1000	Ac-Tub, 6B-11, Santa Cruz, 1:1000	DAPI	2020-10-16	No.1
KAN546-9	RPE-BFP-Cas9 TTBK2 KO (pool)	Serum starved for 24 hours	Fixed in 4% PFA at RT for 15 minutes.	ARL13B, Proteintech, 17711-1-AP, 1:1000	CEP170, Invitrogen, 41-3200, 1:1000	Ac-Tub, 6B-11, Santa Cruz, 1:1000	DAPI	2020-10-16	No.1
KAN546-10	RPE-BFP-Cas9 INPP5E KO (pool)	Serum starved for 24 hours	Fixed in 4% PFA at RT for 15 minutes.	ARL13B, Proteintech, 17711-1-AP, 1:1000	CEP170, Invitrogen, 41-3200, 1:1000	Ac-Tub, 6B-11, Santa Cruz, 1:1000	DAPI	2020-10-16	No.1
KAN546-11	RPE-BFP-Cas9 Kiz KO (pool)	Serum starved for 24 hours	Fixed in 4% PFA at RT for 15 minutes.	ARL13B, Proteintech, 17711-1-AP, 1:1000	CEP170, Invitrogen, 41-3200, 1:1000	Ac-Tub, 6B-11, Santa Cruz, 1:1000	DAPI	2020-10-16	No.1
KAN546-12	RPE-BFP-Cas9 sgPDE6D#1	Serum starved for 24 hours	Fixed in 4% PFA at RT for 15 minutes.	ARL13B, Proteintech, 17711-1-AP, 1:1000	CEP170, Invitrogen, 41-3200, 1:1000	Ac-Tub, 6B-11, Santa Cruz, 1:1000	DAPI	2020-10-16	No.1
KAN546-13	RPE-BFP-Cas9 sgLRRC45#1	Serum starved for 24 hours	Fixed in 4% PFA at RT for 15 minutes.	ARL13B, Proteintech, 17711-1-AP, 1:1000	CEP170, Invitrogen, 41-3200, 1:1000	Ac-Tub, 6B-11, Santa Cruz, 1:1000	DAPI	2020-10-16	No.1
Exp.2
KAN565-1	RPE-BFP-Cas9 pMCB306 (pool)	Serum starved for 24 hours	Fixed in 4% PFA at RT for 15 minutes.	ARL13B, Proteintech, 17711-1-AP, 1:1000	CEP170, Invitrogen, 41-3200, 1:1000	Ac-Tub, 6B-11, Santa Cruz, 1:1000	DAPI	2020-10-23	No.2
KAN565-2	RPE-BFP-Cas9 CEP164KO (pool)	Serum starved for 24 hours	Fixed in 4% PFA at RT for 15 minutes.	ARL13B, Proteintech, 17711-1-AP, 1:1000	CEP170, Invitrogen, 41-3200, 1:1000	Ac-Tub, 6B-11, Santa Cruz, 1:1000	DAPI	2020-10-23	No.2
KAN565-3	RPE-BFP-Cas9 CEP83 KO (pool)	Serum starved for 24 hours	Fixed in 4% PFA at RT for 15 minutes.	ARL13B, Proteintech, 17711-1-AP, 1:1000	CEP170, Invitrogen, 41-3200, 1:1000	Ac-Tub, 6B-11, Santa Cruz, 1:1000	DAPI	2020-10-23	No.2
KAN565-4	RPE-BFP-Cas9 SCLT1 KO (pool)	Serum starved for 24 hours	Fixed in 4% PFA at RT for 15 minutes.	ARL13B, Proteintech, 17711-1-AP, 1:1000	CEP170, Invitrogen, 41-3200, 1:1000	Ac-Tub, 6B-11, Santa Cruz, 1:1000	DAPI	2020-10-23	No.2
KAN565-5	RPE-BFP-Cas9 FBF1 KO (pool)	Serum starved for 24 hours	Fixed in 4% PFA at RT for 15 minutes.	ARL13B, Proteintech, 17711-1-AP, 1:1000	CEP170, Invitrogen, 41-3200, 1:1000	Ac-Tub, 6B-11, Santa Cruz, 1:1000	DAPI	2020-10-23	No.2
KAN565-6	RPE-BFP-Cas9 CEP89KO (pool)	Serum starved for 24 hours	Fixed in 4% PFA at RT for 15 minutes.	ARL13B, Proteintech, 17711-1-AP, 1:1000	CEP170, Invitrogen, 41-3200, 1:1000	Ac-Tub, 6B-11, Santa Cruz, 1:1000	DAPI	2020-10-23	No.2
KAN565-7	RPE-BFP-Cas9 CCDC92 KO (pool)	Serum starved for 24 hours	Fixed in 4% PFA at RT for 15 minutes.	ARL13B, Proteintech, 17711-1-AP, 1:1000	CEP170, Invitrogen, 41-3200, 1:1000	Ac-Tub, 6B-11, Santa Cruz, 1:1000	DAPI	2020-10-23	No.2
KAN565-8	RPE-BFP-Cas9 ANKRD26 KO (pool)	Serum starved for 24 hours	Fixed in 4% PFA at RT for 15 minutes.	ARL13B, Proteintech, 17711-1-AP, 1:1000	CEP170, Invitrogen, 41-3200, 1:1000	Ac-Tub, 6B-11, Santa Cruz, 1:1000	DAPI	2020-10-23	No.2
KAN565-9	RPE-BFP-Cas9 TTBK2 KO (pool)	Serum starved for 24 hours	Fixed in 4% PFA at RT for 15 minutes.	ARL13B, Proteintech, 17711-1-AP, 1:1000	CEP170, Invitrogen, 41-3200, 1:1000	Ac-Tub, 6B-11, Santa Cruz, 1:1000	DAPI	2020-10-23	No.2
KAN565-10	RPE-BFP-Cas9 INPP5E KO (pool)	Serum starved for 24 hours	Fixed in 4% PFA at RT for 15 minutes.	ARL13B, Proteintech, 17711-1-AP, 1:1000	CEP170, Invitrogen, 41-3200, 1:1000	Ac-Tub, 6B-11, Santa Cruz, 1:1000	DAPI	2020-10-23	No.2
KAN565-11	RPE-BFP-Cas9 Kiz KO (pool)	Serum starved for 24 hours	Fixed in 4% PFA at RT for 15 minutes.	ARL13B, Proteintech, 17711-1-AP, 1:1000	CEP170, Invitrogen, 41-3200, 1:1000	Ac-Tub, 6B-11, Santa Cruz, 1:1000	DAPI	2020-10-23	No.2
KAN565-12	RPE-BFP-Cas9 sgPDE6D#1	Serum starved for 24 hours	Fixed in 4% PFA at RT for 15 minutes.	ARL13B, Proteintech, 17711-1-AP, 1:1000	CEP170, Invitrogen, 41-3200, 1:1000	Ac-Tub, 6B-11, Santa Cruz, 1:1000	DAPI	2020-10-23	No.2
KAN565-13	RPE-BFP-Cas9 sgLRRC45#1	Serum starved for 24 hours	Fixed in 4% PFA at RT for 15 minutes.	ARL13B, Proteintech, 17711-1-AP, 1:1000	CEP170, Invitrogen, 41-3200, 1:1000	Ac-Tub, 6B-11, Santa Cruz, 1:1000	DAPI	2020-10-23	No.2
Exp.3
KAN566-1	RPE-BFP-Cas9 pMCB306 (pool)	Serum starved for 24 hours	Fixed in 4% PFA at RT for 15 minutes.	ARL13B, Proteintech, 17711-1-AP, 1:1000	CEP170, Invitrogen, 41-3200, 1:1000	Ac-Tub, 6B-11, Santa Cruz, 1:1000	DAPI	2020-10-23	No.3
KAN566-2	RPE-BFP-Cas9 CEP164KO (pool)	Serum starved for 24 hours	Fixed in 4% PFA at RT for 15 minutes.	ARL13B, Proteintech, 17711-1-AP, 1:1000	CEP170, Invitrogen, 41-3200, 1:1000	Ac-Tub, 6B-11, Santa Cruz, 1:1000	DAPI	2020-10-23	No.3
KAN566-3	RPE-BFP-Cas9 CEP83 KO (pool)	Serum starved for 24 hours	Fixed in 4% PFA at RT for 15 minutes.	ARL13B, Proteintech, 17711-1-AP, 1:1000	CEP170, Invitrogen, 41-3200, 1:1000	Ac-Tub, 6B-11, Santa Cruz, 1:1000	DAPI	2020-10-23	No.3
KAN566-4	RPE-BFP-Cas9 SCLT1 KO (pool)	Serum starved for 24 hours	Fixed in 4% PFA at RT for 15 minutes.	ARL13B, Proteintech, 17711-1-AP, 1:1000	CEP170, Invitrogen, 41-3200, 1:1000	Ac-Tub, 6B-11, Santa Cruz, 1:1000	DAPI	2020-10-23	No.3
KAN566-5	RPE-BFP-Cas9 FBF1 KO (pool)	Serum starved for 24 hours	Fixed in 4% PFA at RT for 15 minutes.	ARL13B, Proteintech, 17711-1-AP, 1:1000	CEP170, Invitrogen, 41-3200, 1:1000	Ac-Tub, 6B-11, Santa Cruz, 1:1000	DAPI	2020-10-23	No.3
KAN566-6	RPE-BFP-Cas9 CEP89KO (pool)	Serum starved for 24 hours	Fixed in 4% PFA at RT for 15 minutes.	ARL13B, Proteintech, 17711-1-AP, 1:1000	CEP170, Invitrogen, 41-3200, 1:1000	Ac-Tub, 6B-11, Santa Cruz, 1:1000	DAPI	2020-10-23	No.3
KAN566-7	RPE-BFP-Cas9 CCDC92 KO (pool)	Serum starved for 24 hours	Fixed in 4% PFA at RT for 15 minutes.	ARL13B, Proteintech, 17711-1-AP, 1:1000	CEP170, Invitrogen, 41-3200, 1:1000	Ac-Tub, 6B-11, Santa Cruz, 1:1000	DAPI	2020-10-23	No.3
KAN566-8	RPE-BFP-Cas9 ANKRD26 KO (pool)	Serum starved for 24 hours	Fixed in 4% PFA at RT for 15 minutes.	ARL13B, Proteintech, 17711-1-AP, 1:1000	CEP170, Invitrogen, 41-3200, 1:1000	Ac-Tub, 6B-11, Santa Cruz, 1:1000	DAPI	2020-10-23	No.3
KAN566-9	RPE-BFP-Cas9 TTBK2 KO (pool)	Serum starved for 24 hours	Fixed in 4% PFA at RT for 15 minutes.	ARL13B, Proteintech, 17711-1-AP, 1:1000	CEP170, Invitrogen, 41-3200, 1:1000	Ac-Tub, 6B-11, Santa Cruz, 1:1000	DAPI	2020-10-23	No.3
KAN566-10	RPE-BFP-Cas9 INPP5E KO (pool)	Serum starved for 24 hours	Fixed in 4% PFA at RT for 15 minutes.	ARL13B, Proteintech, 17711-1-AP, 1:1000	CEP170, Invitrogen, 41-3200, 1:1000	Ac-Tub, 6B-11, Santa Cruz, 1:1000	DAPI	2020-10-23	No.3
KAN566-11	RPE-BFP-Cas9 Kiz KO (pool)	Serum starved for 24 hours	Fixed in 4% PFA at RT for 15 minutes.	ARL13B, Proteintech, 17711-1-AP, 1:1000	CEP170, Invitrogen, 41-3200, 1:1000	Ac-Tub, 6B-11, Santa Cruz, 1:1000	DAPI	2020-10-23	No.3
KAN566-12	RPE-BFP-Cas9 sgPDE6D#1	Serum starved for 24 hours	Fixed in 4% PFA at RT for 15 minutes.	ARL13B, Proteintech, 17711-1-AP, 1:1000	CEP170, Invitrogen, 41-3200, 1:1000	Ac-Tub, 6B-11, Santa Cruz, 1:1000	DAPI	2020-10-23	No.3
KAN566-13	RPE-BFP-Cas9 sgLRRC45#1	Serum starved for 24 hours	Fixed in 4% PFA at RT for 15 minutes.	ARL13B, Proteintech, 17711-1-AP, 1:1000	CEP170, Invitrogen, 41-3200, 1:1000	Ac-Tub, 6B-11, Santa Cruz, 1:1000	DAPI	2020-10-23	No.3
Exp.4
KAN647-1	RPE-BFP-Cas9 pMCB306 (pool)	Serum starved for 24 hours	Fixed in 4% PFA at RT for 15 minutes.	ARL13B, Proteintech, 17711-1-AP, 1:2000	CEP170, Invitrogen, 41-3200, 1:1000	Ac-Tub, 6B-11, Santa Cruz, 1:1000	DAPI	2021-05-10	No.1
KAN647-2	RPE-BFP-Cas9 LRRC45 KO (pool)	Serum starved for 24 hours	Fixed in 4% PFA at RT for 15 minutes.	ARL13B, Proteintech, 17711-1-AP, 1:2000	CEP170, Invitrogen, 41-3200, 1:1000	Ac-Tub, 6B-11, Santa Cruz, 1:1000	DAPI	2021-05-10	No.1
KAN647-3	RPE-BFP-Cas9 FOP KO (pool)	Serum starved for 24 hours	Fixed in 4% PFA at RT for 15 minutes.	ARL13B, Proteintech, 17711-1-AP, 1:2000	CEP170, Invitrogen, 41-3200, 1:1000	Ac-Tub, 6B-11, Santa Cruz, 1:1000	DAPI	2021-05-10	No.1
KAN647-4	RPE-BFP-Cas9 sgIFT52#1	Serum starved for 24 hours	Fixed in 4% PFA at RT for 15 minutes.	ARL13B, Proteintech, 17711-1-AP, 1:2000	CEP170, Invitrogen, 41-3200, 1:1000	Ac-Tub, 6B-11, Santa Cruz, 1:1000	DAPI	2021-05-10	No.1
KAN647-5	RPE-BFP-Cas9 sgSafe (pool)	Serum starved for 24 hours	Fixed in 4% PFA at RT for 15 minutes.	ARL13B, Proteintech, 17711-1-AP, 1:2000	CEP170, Invitrogen, 41-3200, 1:1000	Ac-Tub, 6B-11, Santa Cruz, 1:1000	DAPI	2021-05-10	No.1
Exp.5
KAN647-11	RPE-BFP-Cas9 pMCB306 (pool)	Serum starved for 24 hours	Fixed in 4% PFA at RT for 15 minutes.	ARL13B, Proteintech, 17711-1-AP, 1:2000	CEP170, Invitrogen, 41-3200, 1:1000	Ac-Tub, 6B-11, Santa Cruz, 1:1000	DAPI	2021-05-10	No.2
KAN647-12	RPE-BFP-Cas9 LRRC45 KO (pool)	Serum starved for 24 hours	Fixed in 4% PFA at RT for 15 minutes.	ARL13B, Proteintech, 17711-1-AP, 1:2000	CEP170, Invitrogen, 41-3200, 1:1000	Ac-Tub, 6B-11, Santa Cruz, 1:1000	DAPI	2021-05-10	No.2
KAN647-13	RPE-BFP-Cas9 FOP KO (pool)	Serum starved for 24 hours	Fixed in 4% PFA at RT for 15 minutes.	ARL13B, Proteintech, 17711-1-AP, 1:2000	CEP170, Invitrogen, 41-3200, 1:1000	Ac-Tub, 6B-11, Santa Cruz, 1:1000	DAPI	2021-05-10	No.2
KAN647-14	RPE-BFP-Cas9 sgIFT52#1	Serum starved for 24 hours	Fixed in 4% PFA at RT for 15 minutes.	ARL13B, Proteintech, 17711-1-AP, 1:2000	CEP170, Invitrogen, 41-3200, 1:1000	Ac-Tub, 6B-11, Santa Cruz, 1:1000	DAPI	2021-05-10	No.2
KAN647-15	RPE-BFP-Cas9 sgSafe (pool)	Serum starved for 24 hours	Fixed in 4% PFA at RT for 15 minutes.	ARL13B, Proteintech, 17711-1-AP, 1:2000	CEP170, Invitrogen, 41-3200, 1:1000	Ac-Tub, 6B-11, Santa Cruz, 1:1000	DAPI	2021-05-10	No.2
Exp.6
KAN672-1	RPE-BFP-Cas9 pMCB306 (pool)	Serum starved for 24 hours	Fixed in 4% PFA at RT for 15 minutes.	ARL13B, Proteintech, 17711-1-AP, 1:2000	CEP170, Invitrogen, 41-3200, 1:1000	Ac-Tub, 6B-11, Santa Cruz, 1:1000	DAPI	2021-05-21	No.4
KAN672-2	RPE-BFP-Cas9 LRRC45 KO (pool)	Serum starved for 24 hours	Fixed in 4% PFA at RT for 15 minutes.	ARL13B, Proteintech, 17711-1-AP, 1:2000	CEP170, Invitrogen, 41-3200, 1:1000	Ac-Tub, 6B-11, Santa Cruz, 1:1000	DAPI	2021-05-21	No.4
KAN672-3	RPE-BFP-Cas9 FOP KO (pool)	Serum starved for 24 hours	Fixed in 4% PFA at RT for 15 minutes.	ARL13B, Proteintech, 17711-1-AP, 1:2000	CEP170, Invitrogen, 41-3200, 1:1000	Ac-Tub, 6B-11, Santa Cruz, 1:1000	DAPI	2021-05-21	No.4
KAN672-4	RPE-BFP-Cas9 sgIFT52#1	Serum starved for 24 hours	Fixed in 4% PFA at RT for 15 minutes.	ARL13B, Proteintech, 17711-1-AP, 1:2000	CEP170, Invitrogen, 41-3200, 1:1000	Ac-Tub, 6B-11, Santa Cruz, 1:1000	DAPI	2021-05-21	No.4
KAN672-5	RPE-BFP-Cas9 sgSafe (pool)	Serum starved for 24 hours	Fixed in 4% PFA at RT for 15 minutes.	ARL13B, Proteintech, 17711-1-AP, 1:2000	CEP170, Invitrogen, 41-3200, 1:1000	Ac-Tub, 6B-11, Santa Cruz, 1:1000	DAPI	2021-05-21	No.4
Exp.7
KAN694-1	RPE-BFP-Cas9 sgSafe (pool)	Serum starved for 24 hours	Fixed in 4% PFA at RT for 15 minutes.	ARL13B, Proteintech, 17711-1-AP, 1:2000	CEP170, Invitrogen, 41-3200, 1:1000	Ac-Tub, 6B-11, Santa Cruz, 1:1000	DAPI	2021-09-17
KAN694-2	RPE-BFP-Cas9 CEP164KO (pool)	Serum starved for 24 hours	Fixed in 4% PFA at RT for 15 minutes.	ARL13B, Proteintech, 17711-1-AP, 1:2000	CEP170, Invitrogen, 41-3200, 1:1000	Ac-Tub, 6B-11, Santa Cruz, 1:1000	DAPI	2021-09-17
KAN694-3	RPE-BFP-Cas9 CEP83 KO (pool)	Serum starved for 24 hours	Fixed in 4% PFA at RT for 15 minutes.	ARL13B, Proteintech, 17711-1-AP, 1:2000	CEP170, Invitrogen, 41-3200, 1:1000	Ac-Tub, 6B-11, Santa Cruz, 1:1000	DAPI	2021-09-17
KAN694-4	RPE-BFP-Cas9 SCLT1 KO (pool)	Serum starved for 24 hours	Fixed in 4% PFA at RT for 15 minutes.	ARL13B, Proteintech, 17711-1-AP, 1:2000	CEP170, Invitrogen, 41-3200, 1:1000	Ac-Tub, 6B-11, Santa Cruz, 1:1000	DAPI	2021-09-17
KAN694-5	RPE-BFP-Cas9 FBF1 KO (pool)	Serum starved for 24 hours	Fixed in 4% PFA at RT for 15 minutes.	ARL13B, Proteintech, 17711-1-AP, 1:2000	CEP170, Invitrogen, 41-3200, 1:1000	Ac-Tub, 6B-11, Santa Cruz, 1:1000	DAPI	2021-09-17
KAN694-6	RPE-BFP-Cas9 CEP89KO (pool)	Serum starved for 24 hours	Fixed in 4% PFA at RT for 15 minutes.	ARL13B, Proteintech, 17711-1-AP, 1:2000	CEP170, Invitrogen, 41-3200, 1:1000	Ac-Tub, 6B-11, Santa Cruz, 1:1000	DAPI	2021-09-17
KAN694-7	RPE-BFP-Cas9 CCDC92 KO (pool)	Serum starved for 24 hours	Fixed in 4% PFA at RT for 15 minutes.	ARL13B, Proteintech, 17711-1-AP, 1:2000	CEP170, Invitrogen, 41-3200, 1:1000	Ac-Tub, 6B-11, Santa Cruz, 1:1000	DAPI	2021-09-17
KAN694-8	RPE-BFP-Cas9 ANKRD26 KO (pool)	Serum starved for 24 hours	Fixed in 4% PFA at RT for 15 minutes.	ARL13B, Proteintech, 17711-1-AP, 1:2000	CEP170, Invitrogen, 41-3200, 1:1000	Ac-Tub, 6B-11, Santa Cruz, 1:1000	DAPI	2021-09-17
KAN694-9	RPE-BFP-Cas9 TTBK2 KO (pool)	Serum starved for 24 hours	Fixed in 4% PFA at RT for 15 minutes.	ARL13B, Proteintech, 17711-1-AP, 1:2000	CEP170, Invitrogen, 41-3200, 1:1000	Ac-Tub, 6B-11, Santa Cruz, 1:1000	DAPI	2021-09-17
KAN694-10	RPE-BFP-Cas9 INPP5E KO (pool)	Serum starved for 24 hours	Fixed in 4% PFA at RT for 15 minutes.	ARL13B, Proteintech, 17711-1-AP, 1:2000	CEP170, Invitrogen, 41-3200, 1:1000	Ac-Tub, 6B-11, Santa Cruz, 1:1000	DAPI	2021-09-17
KAN694-11	RPE-BFP-Cas9 Kiz KO (pool)	Serum starved for 24 hours	Fixed in 4% PFA at RT for 15 minutes.	ARL13B, Proteintech, 17711-1-AP, 1:2000	CEP170, Invitrogen, 41-3200, 1:1000	Ac-Tub, 6B-11, Santa Cruz, 1:1000	DAPI	2021-09-17
KAN694-12	RPE-BFP-Cas9 LRRC45 KO (pool)	Serum starved for 24 hours	Fixed in 4% PFA at RT for 15 minutes.	ARL13B, Proteintech, 17711-1-AP, 1:2000	CEP170, Invitrogen, 41-3200, 1:1000	Ac-Tub, 6B-11, Santa Cruz, 1:1000	DAPI	2021-09-17
Exp.8
KAN700-1	RPE-BFP-Cas9 sgSafe (pool)	Serum starved for 24 hours	Fixed in 4% PFA at RT for 15 minutes.	ARL13B, Proteintech, 17711-1-AP, 1:1000	CEP170, Invitrogen, 41-3200, 1:1000	Ac-Tub, 6B-11, Santa Cruz, 1:1000	DAPI	2021-10-04
KAN700-2	RPE-BFP-Cas9 CEP164KO (pool)	Serum starved for 24 hours	Fixed in 4% PFA at RT for 15 minutes.	ARL13B, Proteintech, 17711-1-AP, 1:1000	CEP170, Invitrogen, 41-3200, 1:1000	Ac-Tub, 6B-11, Santa Cruz, 1:1000	DAPI	2021-10-04
KAN700-3	RPE-BFP-Cas9 CEP83 KO (pool)	Serum starved for 24 hours	Fixed in 4% PFA at RT for 15 minutes.	ARL13B, Proteintech, 17711-1-AP, 1:1000	CEP170, Invitrogen, 41-3200, 1:1000	Ac-Tub, 6B-11, Santa Cruz, 1:1000	DAPI	2021-10-04
KAN700-4	RPE-BFP-Cas9 SCLT1 KO (pool)	Serum starved for 24 hours	Fixed in 4% PFA at RT for 15 minutes.	ARL13B, Proteintech, 17711-1-AP, 1:1000	CEP170, Invitrogen, 41-3200, 1:1000	Ac-Tub, 6B-11, Santa Cruz, 1:1000	DAPI	2021-10-04
KAN700-5	RPE-BFP-Cas9 FBF1 KO (pool)	Serum starved for 24 hours	Fixed in 4% PFA at RT for 15 minutes.	ARL13B, Proteintech, 17711-1-AP, 1:1000	CEP170, Invitrogen, 41-3200, 1:1000	Ac-Tub, 6B-11, Santa Cruz, 1:1000	DAPI	2021-10-04
KAN700-6	RPE-BFP-Cas9 CEP89KO (pool)	Serum starved for 24 hours	Fixed in 4% PFA at RT for 15 minutes.	ARL13B, Proteintech, 17711-1-AP, 1:1000	CEP170, Invitrogen, 41-3200, 1:1000	Ac-Tub, 6B-11, Santa Cruz, 1:1000	DAPI	2021-10-04
KAN700-7	RPE-BFP-Cas9 CCDC92 KO (pool)	Serum starved for 24 hours	Fixed in 4% PFA at RT for 15 minutes.	ARL13B, Proteintech, 17711-1-AP, 1:1000	CEP170, Invitrogen, 41-3200, 1:1000	Ac-Tub, 6B-11, Santa Cruz, 1:1000	DAPI	2021-10-04
KAN700-8	RPE-BFP-Cas9 ANKRD26 KO (pool)	Serum starved for 24 hours	Fixed in 4% PFA at RT for 15 minutes.	ARL13B, Proteintech, 17711-1-AP, 1:1000	CEP170, Invitrogen, 41-3200, 1:1000	Ac-Tub, 6B-11, Santa Cruz, 1:1000	DAPI	2021-10-04
KAN700-9	RPE-BFP-Cas9 TTBK2 KO (pool)	Serum starved for 24 hours	Fixed in 4% PFA at RT for 15 minutes.	ARL13B, Proteintech, 17711-1-AP, 1:1000	CEP170, Invitrogen, 41-3200, 1:1000	Ac-Tub, 6B-11, Santa Cruz, 1:1000	DAPI	2021-10-04
KAN700-10	RPE-BFP-Cas9 INPP5E KO (pool)	Serum starved for 24 hours	Fixed in 4% PFA at RT for 15 minutes.	ARL13B, Proteintech, 17711-1-AP, 1:1000	CEP170, Invitrogen, 41-3200, 1:1000	Ac-Tub, 6B-11, Santa Cruz, 1:1000	DAPI	2021-10-04
KAN700-11	RPE-BFP-Cas9 Kiz KO (pool)	Serum starved for 24 hours	Fixed in 4% PFA at RT for 15 minutes.	ARL13B, Proteintech, 17711-1-AP, 1:1000	CEP170, Invitrogen, 41-3200, 1:1000	Ac-Tub, 6B-11, Santa Cruz, 1:1000	DAPI	2021-10-04
KAN700-12	RPE-BFP-Cas9 LRRC45 KO (pool)	Serum starved for 24 hours	Fixed in 4% PFA at RT for 15 minutes.	ARL13B, Proteintech, 17711-1-AP, 1:1000	CEP170, Invitrogen, 41-3200, 1:1000	Ac-Tub, 6B-11, Santa Cruz, 1:1000	DAPI	2021-10-04

## Sheet: Statistics
Table Analyzed	Data 1		Table Analyzed	Data 1		Table Analyzed	Data 1		Table Analyzed	Data 1		Table Analyzed	Data 1		Table Analyzed	Data 1		Table Analyzed	Data 1		Table Analyzed	Data 1		Table Analyzed	Data 1		Table Analyzed	Data 1		Table Analyzed	Data 1
Column B	CEP164 KO		Column C	CEP83 KO		Column D	SCLT1 KO		Column E	FBF1KO		Column F	CEP89KO		Column H	ANKRD26 KO		Column I	TTBK2 KO		Column J	INPP5E KO		Column K	KIZ KO		Column L	LRRC45KO		Column M	sgSafe
vs.	vs.		vs.	vs.		vs.	vs.		vs.	vs.		vs.	vs.		vs.	vs.		vs.	vs.		vs.	vs.		vs.	vs.		vs.	vs.		vs.	vs.
Column A	pMCB306		Column A	pMCB306		Column A	pMCB306		Column A	pMCB306		Column A	pMCB306		Column A	pMCB306		Column A	pMCB306		Column A	pMCB306		Column A	pMCB306		Column A	pMCB306		Column A	pMCB306
Unpaired t test with Welch's correction			Unpaired t test with Welch's correction			Unpaired t test with Welch's correction			Unpaired t test with Welch's correction			Unpaired t test with Welch's correction			Unpaired t test with Welch's correction			Unpaired t test with Welch's correction			Unpaired t test with Welch's correction			Unpaired t test with Welch's correction			Unpaired t test with Welch's correction			Unpaired t test with Welch's correction
P value	<0.0001		P value	<0.0001		P value	<0.0001		P value	<0.0001		P value	<0.0001		P value	<0.0001		P value	<0.0001		P value	0.0882		P value	0.0476		P value	0.5803		P value	0.7966
P value summary	****		P value summary	****		P value summary	****		P value summary	****		P value summary	****		P value summary	****		P value summary	****		P value summary	ns		P value summary	*		P value summary	ns		P value summary	ns
Significantly different (P < 0.05)?	Yes		Significantly different (P < 0.05)?	Yes		Significantly different (P < 0.05)?	Yes		Significantly different (P < 0.05)?	Yes		Significantly different (P < 0.05)?	Yes		Significantly different (P < 0.05)?	Yes		Significantly different (P < 0.05)?	Yes		Significantly different (P < 0.05)?	No		Significantly different (P < 0.05)?	Yes		Significantly different (P < 0.05)?	No		Significantly different (P < 0.05)?	No
One- or two-tailed P value?	Two-tailed		One- or two-tailed P value?	Two-tailed		One- or two-tailed P value?	Two-tailed		One- or two-tailed P value?	Two-tailed		One- or two-tailed P value?	Two-tailed		One- or two-tailed P value?	Two-tailed		One- or two-tailed P value?	Two-tailed		One- or two-tailed P value?	Two-tailed		One- or two-tailed P value?	Two-tailed		One- or two-tailed P value?	Two-tailed		One- or two-tailed P value?	Two-tailed
Welch-corrected t, df	t=117.5, df=5.000		Welch-corrected t, df	t=117.5, df=5.000		Welch-corrected t, df	t=109.2, df=6.089		Welch-corrected t, df	t=19.43, df=5.215		Welch-corrected t, df	t=17.24, df=5.169		Welch-corrected t, df	t=34.17, df=6.499		Welch-corrected t, df	t=117.5, df=5.000		Welch-corrected t, df	t=2.175, df=4.460		Welch-corrected t, df	t=2.576, df=5.229		Welch-corrected t, df	t=0.5930, df=4.740		Welch-corrected t, df	t=0.2711, df=5.290
How big is the difference?			How big is the difference?			How big is the difference?			How big is the difference?			How big is the difference?			How big is the difference?			How big is the difference?			How big is the difference?			How big is the difference?			How big is the difference?			How big is the difference?
Mean of column A	82.37		Mean of column A	82.37		Mean of column A	82.37		Mean of column A	82.37		Mean of column A	82.37		Mean of column A	82.37		Mean of column A	82.37		Mean of column A	82.37		Mean of column A	82.37		Mean of column A	82.37		Mean of column A	82.37
Mean of column B	0		Mean of column C	0		Mean of column D	1.612		Mean of column E	44.91		Mean of column F	48.57		Mean of column H	34.21		Mean of column I	0		Mean of column J	75.83		Mean of column K	77.43		Mean of column L	80.94		Mean of column M	82.88
Difference between means (B - A) ± SEM	-82.37 ± 0.7010		Difference between means (C - A) ± SEM	-82.37 ± 0.7010		Difference between means (D - A) ± SEM	-80.76 ± 0.7393		Difference between means (E - A) ± SEM	-37.47 ± 1.928		Difference between means (F - A) ± SEM	-33.80 ± 1.961		Difference between means (H - A) ± SEM	-48.17 ± 1.410		Difference between means (I - A) ± SEM	-82.37 ± 0.7010		Difference between means (J - A) ± SEM	-6.546 ± 3.009		Difference between means (K - A) ± SEM	-4.941 ± 1.918		Difference between means (L - A) ± SEM	-1.430 ± 2.411		Difference between means (M - A) ± SEM	0.5090 ± 1.878
95% confidence interval	-84.18 to -80.57		95% confidence interval	-84.18 to -80.57		95% confidence interval	-82.56 to -78.96		95% confidence interval	-42.36 to -32.57		95% confidence interval	-38.79 to -28.81		95% confidence interval	-51.55 to -44.78		95% confidence interval	-84.18 to -80.57		95% confidence interval	-14.57 to 1.480		95% confidence interval	-9.808 to -0.07452		95% confidence interval	-7.732 to 4.872		95% confidence interval	-4.239 to 5.257
R squared (eta squared)	0.9996		R squared (eta squared)	0.9996		R squared (eta squared)	0.9995		R squared (eta squared)	0.9864		R squared (eta squared)	0.9829		R squared (eta squared)	0.9945		R squared (eta squared)	0.9996		R squared (eta squared)	0.5147		R squared (eta squared)	0.5593		R squared (eta squared)	0.06906		R squared (eta squared)	0.0137
F test to compare variances			F test to compare variances			F test to compare variances			F test to compare variances			F test to compare variances			F test to compare variances			F test to compare variances			F test to compare variances			F test to compare variances			F test to compare variances			F test to compare variances
F, DFn, Dfd	Infinity, 5, 4		F, DFn, Dfd	Infinity, 5, 4		F, DFn, Dfd	10.70, 5, 4		F, DFn, Dfd	5.470, 4, 5		F, DFn, Dfd	5.688, 4, 5		F, DFn, Dfd	2.537, 4, 5		F, DFn, Dfd	Infinity, 5, 4		F, DFn, Dfd	14.52, 4, 5		F, DFn, Dfd	5.406, 4, 5		F, DFn, Dfd	9.026, 4, 5		F, DFn, Dfd	5.145, 4, 5
P value	<0.0001		P value	<0.0001		P value	0.0395		P value	0.0906		P value	0.084		P value	0.3349		P value	<0.0001		P value	0.0117		P value	0.0926		P value	0.033		P value	0.1017
P value summary	****		P value summary	****		P value summary	*		P value summary	ns		P value summary	ns		P value summary	ns		P value summary	****		P value summary	*		P value summary	ns		P value summary	*		P value summary	ns
Significantly different (P < 0.05)?	Yes		Significantly different (P < 0.05)?	Yes		Significantly different (P < 0.05)?	Yes		Significantly different (P < 0.05)?	No		Significantly different (P < 0.05)?	No		Significantly different (P < 0.05)?	No		Significantly different (P < 0.05)?	Yes		Significantly different (P < 0.05)?	Yes		Significantly different (P < 0.05)?	No		Significantly different (P < 0.05)?	Yes		Significantly different (P < 0.05)?	No
Data analyzed			Data analyzed			Data analyzed			Data analyzed			Data analyzed			Data analyzed			Data analyzed			Data analyzed			Data analyzed			Data analyzed			Data analyzed
Sample size, column A	6		Sample size, column A	6		Sample size, column A	6		Sample size, column A	6		Sample size, column A	6		Sample size, column A	6		Sample size, column A	6		Sample size, column A	6		Sample size, column A	6		Sample size, column A	6		Sample size, column A	6
Sample size, column B	5		Sample size, column C	5		Sample size, column D	5		Sample size, column E	5		Sample size, column F	5		Sample size, column H	5		Sample size, column I	5		Sample size, column J	5		Sample size, column K	5		Sample size, column L	5		Sample size, column M	5
