# Supplementary material for: A hierarchical pathway for assembly of the distal appendages that organize primary cilia
Source: eLife. 2025 Jan 30;14:e85999. doi: 10.7554/eLife.85999 (PMC11984956; doi:10.7554/eLife.85999)
Supplement: Figure 5—source data 2. [file elife-85999-fig5-data2.xlsx]

## Sheet: Raw data
sgGFP (pMCB306)				CEP164 KO				CEP83 KO				SCLT1 KO				FBF1 KO				CEP89 KO				CCDC92 KO				ANKRD26 KO				TTBK2 KO				INPP5E KO				KIZ KO				LRRC45 KO				sgSafe
	Ciliated	cell counts	ARL13B+ Ac-Tub- dot		Ciliated	cell counts	ARL13B+ Ac-Tub- dot		Ciliated	cell counts	ARL13B+ Ac-Tub- dot		Ciliated	cell counts	ARL13B+ Ac-Tub- dot		Ciliated	cell counts	ARL13B+ Ac-Tub- dot		Ciliated	cell counts	ARL13B+ Ac-Tub- dot		Ciliated	cell counts	ARL13B+ Ac-Tub- dot		Ciliated	cell counts	ARL13B+ Ac-Tub- dot		Ciliated	cell counts	ARL13B+ Ac-Tub- dot		Ciliated	cell counts	ARL13B+ Ac-Tub- dot		Ciliated	cell counts	ARL13B+ Ac-Tub- dot		Ciliated	cell counts	ARL13B+ Ac-Tub- dot
KAN582-1	27	27		KAN582-2	0	36		KAN582-3	1	37		KAN582-4	2	46		KAN582-5	23	25		KAN582-6	23	31		KAN582-7	35	39		KAN582-8	32	41		KAN582-9	0	36		KAN582-10	38	38		KAN582-11	35	37		KAN582-13	41	43
2	31	31		2	0	29		2	0	25		2	1	30		2	30	33		2	34	38		2	35	43		2	28	36		2	0	35		2	34	34		2	41	43		2	40	44
3	28	28		3	0	33		3	0	35		3	1	40		3	24	29		3	37	42		3	34	46		3	32	36		3	0	32		3	39	40		3	41	45		3	34	40
4	27	31		4	0	30		4	0	40		4	2	33		4	25	33		4	51	58		4	21	30		4	23	31		4	0	40		4	35	37		4	40	43		4	35	40
5	28	29		5	0	26		5	0	35		5	2	38		5	23	28		5	39	46		5	34	40		5	21	29		5	0	28		5	39	42		5	29	32		5	33	43
6	28	31		6	0	35		6	0	48		6	1	42		6	24	30		6	38	43		6	28	38		6	32	42		6	0	35		6	32	34		6	41	45		6	30	37
7				7				7				7				7				7				7				7				7				7				7				7
8				8				8				8				8				8				8				8				8				8				8				8
9				9				9				9				9				9				9				9				9				9				9				9
10				10				10				10				10				10				10				10				10				10				10				10
	169	177	0		0	189	0		1	220	0		9	229	0		149	178	0		222	258	0		187	236	0		168	215	0		0	206	0		217	225	0		227	245	0		213	247	0
		95.4802				0				0.454545				3.93013				83.7079				86.0465				79.2373				78.1395				0				96.4444				92.6531				86.2348
	Ciliated	cell counts	ARL13B+ Ac-Tub- dot		Ciliated	cell counts	ARL13B+ Ac-Tub- dot		Ciliated	cell counts	ARL13B+ Ac-Tub- dot		Ciliated	cell counts	ARL13B+ Ac-Tub- dot		Ciliated	cell counts	ARL13B+ Ac-Tub- dot		Ciliated	cell counts	ARL13B+ Ac-Tub- dot		Ciliated	cell counts	ARL13B+ Ac-Tub- dot		Ciliated	cell counts	ARL13B+ Ac-Tub- dot		Ciliated	cell counts	ARL13B+ Ac-Tub- dot		Ciliated	cell counts	ARL13B+ Ac-Tub- dot		Ciliated	cell counts	ARL13B+ Ac-Tub- dot		Ciliated	cell counts	ARL13B+ Ac-Tub- dot
KAN583-1	28	29		KAN583-2	0	37		KAN583-3	0	40		KAN583-4	0	30		KAN583-5	28	37		KAN583-6	37	45		KAN583-7	16	32		KAN583-8	18	30		KAN583-9	0	35		KAN583-10	35	36		KAN583-11	33	34		KAN583-13	23	26
2	24	26		2	0	35		2	0	44		2	4	35		2	23	28		2	40	46		2	29	39		2	30	43		2	0	37		2	36	40		2	29	33		2	32	38
3	30	31		3	0	37		3	1	41		3	0	31		3	19	23		3	37	44		3	25	35		3	29	42		3	0	30		3	32	35		3	29	30		3	31	35
4	25	28		4	0	38		4	0	45		4	2	33		4	30	33		4	24	33		4	18	32		4	36	44		4	0	33		4	37	40		4	26	29		4	32	32
5	20	26		5	0	24		5	0	35		5	0	25		5	32	36		5	14	23		5	30	37		5	29	35		5	0	34		5	36	37		5	32	33		5	34	40
6	26	28		6	0	35		6	1	39		6	0	32		6	16	19		6	38	43		6	22	31		6	17	27		6	0	30		6	34	35		6	31	35		6	32	40
7				7				7				7				7				7				7				7				7				7				7				7
8				8				8				8				8				8				8				8				8				8				8				8
9				9				9				9				9				9				9				9				9				9				9				9
10				10				10				10				10				10				10				10				10				10				10				10
	153	168	0		0	206	0		2	244	0		6	186	0		148	176	0		190	234	0		140	206	0		159	221	0		0	199	0		210	223	0		180	194	0		184	211	0
		91.0714				0				0.819672				3.22581				84.0909				81.1966				67.9612				71.9457				0				94.1704				92.7835				87.2038
	Ciliated	cell counts	ARL13B+ Ac-Tub- dot		Ciliated	cell counts	ARL13B+ Ac-Tub- dot		Ciliated	cell counts	ARL13B+ Ac-Tub- dot		Ciliated	cell counts	ARL13B+ Ac-Tub- dot		Ciliated	cell counts	ARL13B+ Ac-Tub- dot		Ciliated	cell counts	ARL13B+ Ac-Tub- dot		Ciliated	cell counts	ARL13B+ Ac-Tub- dot		Ciliated	cell counts	ARL13B+ Ac-Tub- dot		Ciliated	cell counts	ARL13B+ Ac-Tub- dot		Ciliated	cell counts	ARL13B+ Ac-Tub- dot		Ciliated	cell counts	ARL13B+ Ac-Tub- dot		Ciliated	cell counts	ARL13B+ Ac-Tub- dot
KAN602-1	41	42		KAN602-2	0	32		KAN602-3	0	40		KAN602-4	1	42		KAN602-5	24	29		KAN602-6	29	39		KAN602-7	31	37		KAN602-8	22	40		KAN602-9	0	31		KAN602-10	47	49		KAN602-11	38	41		KAN602-13	39	44
2	42	45		2	0	36		2	0	44		2	1	33		2	26	34		2	29	44		2	19	33		2	23	35		2	0	39		2	48	52		2	33	40		2	36	44
3	31	32		3	0	38		3	0	51		3	2	35		3	29	34		3	30	39		3	29	39		3	27	43		3	0	38		3	42	47		3	31	38		3	35	38
4	26	28		4	0	40		4	1	49		4	1	33		4	35	38		4	30	37		4	27	39		4	36	45		4	0	38		4	38	41		4	27	33		4	32	34
5	39	43		5	0	30		5	0	46		5	2	43		5	25	31		5	26	29		5	25	35		5	27	40		5	0	39		5	40	43		5	27	33		5	15	27
6	38	41		6	0	34		6	0	36		6	1	37		6	30	33		6	39	42		6	28	35		6	22	37		6	0	50		6	43	45		6	28	33		6	45	48
7				7				7				7				7				7				7				7				7				7				7				7
8				8				8				8				8				8				8				8				8				8				8				8
9				9				9				9				9				9				9				9				9				9				9				9
10				10				10				10				10				10				10				10				10				10				10				10
	217	231	0		0	210	0		1	266	0		8	223	0		169	199	0		183	230	0		159	218	0		157	240	0		0	235	0		258	277	0		184	218	0		202	235	0
		93.9394				0				0.37594				3.58744				84.9246				79.5652				72.9358				65.4167				0				93.1408				84.4037				85.9574
	Ciliated	cell counts	ARL13B+ Ac-Tub- dot																																										Ciliated	cell counts	ARL13B+ Ac-Tub- dot
KAN647-6	65	82																																										KAN647-7	74	88
2	51	59																																										2	61	69
3	52	60																																										3	67	80
4																																												4
5																																												5
6																																												6
7																																												7
8																																												8
9																																												9
10																																												10
	168	201	0																																										202	237	0
		83.5821																																												85.2321
	Ciliated	cell counts	ARL13B+dot																																										Ciliated	cell counts	ARL13B+dot
KAN672-6	26	35																																										KAN672-7	69	75
2	65	71																																										2	60	67
3	65	71																																										3	81	88
4	54	63																																										4	54	62
5																																												5
6																																												6
7																																												7
8																																												8
9																																												9
10																																												10
	210	240	0																																										264	292	0
		87.5																																												90.411
	Ciliated	cell counts	ARL13B+ Ac-Tub- dot																																										Ciliated	cell counts	ARL13B+ Ac-Tub- dot
KAN672-11	68	70																																										KAN672-12	42	45
2	52	54																																										2	36	43
3	59	62																																										3	69	75
4	49	51																																										4	72	80
5																																												5
6																																												6
7																																												7
8																																												8
9																																												9
10																																												10
	228	237	0																																										219	243	0
		96.2025																																												90.1235

## Sheet: IF condition
Exp. number	Cell line	Culture condition	Fixation condition	rabbit-Alexa488	mouse IgG1-Alexa568	mouse IgG2b-Alexa647	Nuclear stain	Date	Replicate
Exp.1
KAN582-1	RPE-BFP-Cas9 pMCB306 (pool)	Serum starved for 48 hours	Fixed in 4% PFA at RT for 15 minutes.	ARL13B, Proteintech, 17711-1-AP, 1:2000	CEP170, Invitrogen, 41-3200, 1:1000	Ac-Tub, 6B-11, Santa Cruz, 1:1000	DAPI	No.1
KAN582-2	RPE-BFP-Cas9 CEP164KO (pool)	Serum starved for 48 hours	Fixed in 4% PFA at RT for 15 minutes.	ARL13B, Proteintech, 17711-1-AP, 1:2000	CEP170, Invitrogen, 41-3200, 1:1000	Ac-Tub, 6B-11, Santa Cruz, 1:1000	DAPI	No.1
KAN582-3	RPE-BFP-Cas9 CEP83 KO (pool)	Serum starved for 48 hours	Fixed in 4% PFA at RT for 15 minutes.	ARL13B, Proteintech, 17711-1-AP, 1:2000	CEP170, Invitrogen, 41-3200, 1:1000	Ac-Tub, 6B-11, Santa Cruz, 1:1000	DAPI	No.1
KAN582-4	RPE-BFP-Cas9 SCLT1 KO (pool)	Serum starved for 48 hours	Fixed in 4% PFA at RT for 15 minutes.	ARL13B, Proteintech, 17711-1-AP, 1:2000	CEP170, Invitrogen, 41-3200, 1:1000	Ac-Tub, 6B-11, Santa Cruz, 1:1000	DAPI	No.1
KAN582-5	RPE-BFP-Cas9 FBF1 KO (pool)	Serum starved for 48 hours	Fixed in 4% PFA at RT for 15 minutes.	ARL13B, Proteintech, 17711-1-AP, 1:2000	CEP170, Invitrogen, 41-3200, 1:1000	Ac-Tub, 6B-11, Santa Cruz, 1:1000	DAPI	No.1
KAN582-6	RPE-BFP-Cas9 CEP89KO (pool)	Serum starved for 48 hours	Fixed in 4% PFA at RT for 15 minutes.	ARL13B, Proteintech, 17711-1-AP, 1:2000	CEP170, Invitrogen, 41-3200, 1:1000	Ac-Tub, 6B-11, Santa Cruz, 1:1000	DAPI	No.1
KAN582-7	RPE-BFP-Cas9 CCDC92 KO (pool)	Serum starved for 48 hours	Fixed in 4% PFA at RT for 15 minutes.	ARL13B, Proteintech, 17711-1-AP, 1:2000	CEP170, Invitrogen, 41-3200, 1:1000	Ac-Tub, 6B-11, Santa Cruz, 1:1000	DAPI	No.1
KAN582-8	RPE-BFP-Cas9 ANKRD26 KO (pool)	Serum starved for 48 hours	Fixed in 4% PFA at RT for 15 minutes.	ARL13B, Proteintech, 17711-1-AP, 1:2000	CEP170, Invitrogen, 41-3200, 1:1000	Ac-Tub, 6B-11, Santa Cruz, 1:1000	DAPI	No.1
KAN582-9	RPE-BFP-Cas9 TTBK2 KO (pool)	Serum starved for 48 hours	Fixed in 4% PFA at RT for 15 minutes.	ARL13B, Proteintech, 17711-1-AP, 1:2000	CEP170, Invitrogen, 41-3200, 1:1000	Ac-Tub, 6B-11, Santa Cruz, 1:1000	DAPI	No.1
KAN582-10	RPE-BFP-Cas9 INPP5E KO (pool)	Serum starved for 48 hours	Fixed in 4% PFA at RT for 15 minutes.	ARL13B, Proteintech, 17711-1-AP, 1:2000	CEP170, Invitrogen, 41-3200, 1:1000	Ac-Tub, 6B-11, Santa Cruz, 1:1000	DAPI	No.1
KAN582-11	RPE-BFP-Cas9 Kiz KO (pool)	Serum starved for 48 hours	Fixed in 4% PFA at RT for 15 minutes.	ARL13B, Proteintech, 17711-1-AP, 1:2000	CEP170, Invitrogen, 41-3200, 1:1000	Ac-Tub, 6B-11, Santa Cruz, 1:1000	DAPI	No.1
KAN582-12	RPE-BFP-Cas9 sgPDE6D#1	Serum starved for 48 hours	Fixed in 4% PFA at RT for 15 minutes.	ARL13B, Proteintech, 17711-1-AP, 1:2000	CEP170, Invitrogen, 41-3200, 1:1000	Ac-Tub, 6B-11, Santa Cruz, 1:1000	DAPI	No.1
KAN582-13	RPE-BFP-Cas9 sgLRRC45#1	Serum starved for 48 hours	Fixed in 4% PFA at RT for 15 minutes.	ARL13B, Proteintech, 17711-1-AP, 1:2000	CEP170, Invitrogen, 41-3200, 1:1000	Ac-Tub, 6B-11, Santa Cruz, 1:1000	DAPI	No.1
Exp.2
KAN583-1	RPE-BFP-Cas9 pMCB306 (pool)		serum starved for 48 hours, Fixed in 4% PFA at RT for 15 minutes.	ARL13B, Proteintech, 17711-1-AP, 1:2000	CEP170, Invitrogen, 41-3200, 1:1000	Ac-Tub, 6B-11, Santa Cruz, 1:1000	DAPI	No.3
KAN583-2	RPE-BFP-Cas9 CEP164KO (pool)		serum starved for 48 hours, Fixed in 4% PFA at RT for 15 minutes.	ARL13B, Proteintech, 17711-1-AP, 1:2000	CEP170, Invitrogen, 41-3200, 1:1000	Ac-Tub, 6B-11, Santa Cruz, 1:1000	DAPI	No.3
KAN583-3	RPE-BFP-Cas9 CEP83 KO (pool)		serum starved for 48 hours, Fixed in 4% PFA at RT for 15 minutes.	ARL13B, Proteintech, 17711-1-AP, 1:2000	CEP170, Invitrogen, 41-3200, 1:1000	Ac-Tub, 6B-11, Santa Cruz, 1:1000	DAPI	No.3
KAN583-4	RPE-BFP-Cas9 SCLT1 KO (pool)		serum starved for 48 hours, Fixed in 4% PFA at RT for 15 minutes.	ARL13B, Proteintech, 17711-1-AP, 1:2000	CEP170, Invitrogen, 41-3200, 1:1000	Ac-Tub, 6B-11, Santa Cruz, 1:1000	DAPI	No.3
KAN583-5	RPE-BFP-Cas9 FBF1 KO (pool)		serum starved for 48 hours, Fixed in 4% PFA at RT for 15 minutes.	ARL13B, Proteintech, 17711-1-AP, 1:2000	CEP170, Invitrogen, 41-3200, 1:1000	Ac-Tub, 6B-11, Santa Cruz, 1:1000	DAPI	No.3
KAN583-6	RPE-BFP-Cas9 CEP89KO (pool)		serum starved for 48 hours, Fixed in 4% PFA at RT for 15 minutes.	ARL13B, Proteintech, 17711-1-AP, 1:2000	CEP170, Invitrogen, 41-3200, 1:1000	Ac-Tub, 6B-11, Santa Cruz, 1:1000	DAPI	No.3
KAN583-7	RPE-BFP-Cas9 CCDC92 KO (pool)		serum starved for 48 hours, Fixed in 4% PFA at RT for 15 minutes.	ARL13B, Proteintech, 17711-1-AP, 1:2000	CEP170, Invitrogen, 41-3200, 1:1000	Ac-Tub, 6B-11, Santa Cruz, 1:1000	DAPI	No.3
KAN583-8	RPE-BFP-Cas9 ANKRD26 KO (pool)		serum starved for 48 hours, Fixed in 4% PFA at RT for 15 minutes.	ARL13B, Proteintech, 17711-1-AP, 1:2000	CEP170, Invitrogen, 41-3200, 1:1000	Ac-Tub, 6B-11, Santa Cruz, 1:1000	DAPI	No.3
KAN583-9	RPE-BFP-Cas9 TTBK2 KO (pool)		serum starved for 48 hours, Fixed in 4% PFA at RT for 15 minutes.	ARL13B, Proteintech, 17711-1-AP, 1:2000	CEP170, Invitrogen, 41-3200, 1:1000	Ac-Tub, 6B-11, Santa Cruz, 1:1000	DAPI	No.3
KAN583-10	RPE-BFP-Cas9 INPP5E KO (pool)		serum starved for 48 hours, Fixed in 4% PFA at RT for 15 minutes.	ARL13B, Proteintech, 17711-1-AP, 1:2000	CEP170, Invitrogen, 41-3200, 1:1000	Ac-Tub, 6B-11, Santa Cruz, 1:1000	DAPI	No.3
KAN583-11	RPE-BFP-Cas9 Kiz KO (pool)		serum starved for 48 hours, Fixed in 4% PFA at RT for 15 minutes.	ARL13B, Proteintech, 17711-1-AP, 1:2000	CEP170, Invitrogen, 41-3200, 1:1000	Ac-Tub, 6B-11, Santa Cruz, 1:1000	DAPI	No.3
KAN583-12	RPE-BFP-Cas9 sgPDE6D#1		serum starved for 48 hours, Fixed in 4% PFA at RT for 15 minutes.	ARL13B, Proteintech, 17711-1-AP, 1:2000	CEP170, Invitrogen, 41-3200, 1:1000	Ac-Tub, 6B-11, Santa Cruz, 1:1000	DAPI	No.3
KAN583-13	RPE-BFP-Cas9 sgLRRC45#1		serum starved for 48 hours, Fixed in 4% PFA at RT for 15 minutes.	ARL13B, Proteintech, 17711-1-AP, 1:2000	CEP170, Invitrogen, 41-3200, 1:1000	Ac-Tub, 6B-11, Santa Cruz, 1:1000	DAPI	No.3
Exp.3
KAN602-1	RPE-BFP-Cas9 pMCB306 (pool)		serum starved for 48 hours, Fixed in 4% PFA at RT for 15 minutes.	ARL13B, Proteintech, 17711-1-AP, 1:2000	CEP170, Invitrogen, 41-3200, 1:1000	Ac-Tub, 6B-11, Santa Cruz, 1:1000	DAPI		2020-12-14	No.5
KAN602-2	RPE-BFP-Cas9 CEP164KO (pool)		serum starved for 48 hours, Fixed in 4% PFA at RT for 15 minutes.	ARL13B, Proteintech, 17711-1-AP, 1:2000	CEP170, Invitrogen, 41-3200, 1:1000	Ac-Tub, 6B-11, Santa Cruz, 1:1000	DAPI		2020-12-14	No.5
KAN602-3	RPE-BFP-Cas9 CEP83 KO (pool)		serum starved for 48 hours, Fixed in 4% PFA at RT for 15 minutes.	ARL13B, Proteintech, 17711-1-AP, 1:2000	CEP170, Invitrogen, 41-3200, 1:1000	Ac-Tub, 6B-11, Santa Cruz, 1:1000	DAPI		2020-12-14	No.5
KAN602-4	RPE-BFP-Cas9 SCLT1 KO (pool)		serum starved for 48 hours, Fixed in 4% PFA at RT for 15 minutes.	ARL13B, Proteintech, 17711-1-AP, 1:2000	CEP170, Invitrogen, 41-3200, 1:1000	Ac-Tub, 6B-11, Santa Cruz, 1:1000	DAPI		2020-12-14	No.5
KAN602-5	RPE-BFP-Cas9 FBF1 KO (pool)		serum starved for 48 hours, Fixed in 4% PFA at RT for 15 minutes.	ARL13B, Proteintech, 17711-1-AP, 1:2000	CEP170, Invitrogen, 41-3200, 1:1000	Ac-Tub, 6B-11, Santa Cruz, 1:1000	DAPI		2020-12-14	No.5
KAN602-6	RPE-BFP-Cas9 CEP89KO (pool)		serum starved for 48 hours, Fixed in 4% PFA at RT for 15 minutes.	ARL13B, Proteintech, 17711-1-AP, 1:2000	CEP170, Invitrogen, 41-3200, 1:1000	Ac-Tub, 6B-11, Santa Cruz, 1:1000	DAPI		2020-12-14	No.5
KAN602-7	RPE-BFP-Cas9 CCDC92 KO (pool)		serum starved for 48 hours, Fixed in 4% PFA at RT for 15 minutes.	ARL13B, Proteintech, 17711-1-AP, 1:2000	CEP170, Invitrogen, 41-3200, 1:1000	Ac-Tub, 6B-11, Santa Cruz, 1:1000	DAPI		2020-12-14	No.5
KAN602-8	RPE-BFP-Cas9 ANKRD26 KO (pool)		serum starved for 48 hours, Fixed in 4% PFA at RT for 15 minutes.	ARL13B, Proteintech, 17711-1-AP, 1:2000	CEP170, Invitrogen, 41-3200, 1:1000	Ac-Tub, 6B-11, Santa Cruz, 1:1000	DAPI		2020-12-14	No.5
KAN602-9	RPE-BFP-Cas9 TTBK2 KO (pool)		serum starved for 48 hours, Fixed in 4% PFA at RT for 15 minutes.	ARL13B, Proteintech, 17711-1-AP, 1:2000	CEP170, Invitrogen, 41-3200, 1:1000	Ac-Tub, 6B-11, Santa Cruz, 1:1000	DAPI		2020-12-14	No.5
KAN602-10	RPE-BFP-Cas9 INPP5E KO (pool)		serum starved for 48 hours, Fixed in 4% PFA at RT for 15 minutes.	ARL13B, Proteintech, 17711-1-AP, 1:2000	CEP170, Invitrogen, 41-3200, 1:1000	Ac-Tub, 6B-11, Santa Cruz, 1:1000	DAPI		2020-12-14	No.5
KAN602-11	RPE-BFP-Cas9 Kiz KO (pool)		serum starved for 48 hours, Fixed in 4% PFA at RT for 15 minutes.	ARL13B, Proteintech, 17711-1-AP, 1:2000	CEP170, Invitrogen, 41-3200, 1:1000	Ac-Tub, 6B-11, Santa Cruz, 1:1000	DAPI		2020-12-14	No.5
KAN602-12	RPE-BFP-Cas9 sgPDE6D#1, post-Cre, sorted		serum starved for 48 hours, Fixed in 4% PFA at RT for 15 minutes.	ARL13B, Proteintech, 17711-1-AP, 1:2000	CEP170, Invitrogen, 41-3200, 1:1000	Ac-Tub, 6B-11, Santa Cruz, 1:1000	DAPI		2020-12-14	No.5
KAN602-13	RPE-BFP-Cas9 sgLRRC45#1, post-Cre, sorted		serum starved for 48 hours, Fixed in 4% PFA at RT for 15 minutes.	ARL13B, Proteintech, 17711-1-AP, 1:2000	CEP170, Invitrogen, 41-3200, 1:1000	Ac-Tub, 6B-11, Santa Cruz, 1:1000	DAPI		2020-12-14	No.5
Exp.4
KAN647-6	RPE-BFP-Cas9 pMCB306 (pool)		serum starved for 48 hours, fixed in 4% PFA at RT for 15 mintues	ARL13B, Proteintech, 17711-1-AP, 1:2000	CEP170, Invitrogen, 41-3200, 1:1000	Ac-Tub, 6B-11, Santa Cruz, 1:1000	DAPI	2021-05-10	No.1
KAN647-7	RPE-BFP-Cas9 LRRC45 KO (pool)		serum starved for 48 hours, fixed in 4% PFA at RT for 15 mintues	ARL13B, Proteintech, 17711-1-AP, 1:2000	CEP170, Invitrogen, 41-3200, 1:1000	Ac-Tub, 6B-11, Santa Cruz, 1:1000	DAPI	2021-05-10	No.1
KAN647-8	RPE-BFP-Cas9 FOP KO (pool)		serum starved for 48 hours, fixed in 4% PFA at RT for 15 mintues	ARL13B, Proteintech, 17711-1-AP, 1:2000	CEP170, Invitrogen, 41-3200, 1:1000	Ac-Tub, 6B-11, Santa Cruz, 1:1000	DAPI	2021-05-10	No.1
KAN647-9	RPE-BFP-Cas9 sgIFT52#1		serum starved for 48 hours, fixed in 4% PFA at RT for 15 mintues	ARL13B, Proteintech, 17711-1-AP, 1:2000	CEP170, Invitrogen, 41-3200, 1:1000	Ac-Tub, 6B-11, Santa Cruz, 1:1000	DAPI	2021-05-10	No.1
KAN647-10	RPE-BFP-Cas9 sgSafe (pool)		serum starved for 48 hours, fixed in 4% PFA at RT for 15 mintues	ARL13B, Proteintech, 17711-1-AP, 1:2000	CEP170, Invitrogen, 41-3200, 1:1000	Ac-Tub, 6B-11, Santa Cruz, 1:1000	DAPI	2021-05-10	No.1
Exp.5
KAN672-6	RPE-BFP-Cas9 pMCB306 (pool)		serum starved for 48 hours, fixed in 4% PFA at RT for 15 mintues	ARL13B, Proteintech, 17711-1-AP, 1:2000	CEP170, Invitrogen, 41-3200, 1:1000	Ac-Tub, 6B-11, Santa Cruz, 1:1000	DAPI	2021-05-21	No.3
KAN672-7	RPE-BFP-Cas9 LRRC45 KO (pool)		serum starved for 48 hours, fixed in 4% PFA at RT for 15 mintues	ARL13B, Proteintech, 17711-1-AP, 1:2000	CEP170, Invitrogen, 41-3200, 1:1000	Ac-Tub, 6B-11, Santa Cruz, 1:1000	DAPI	2021-05-21	No.3
KAN672-8	RPE-BFP-Cas9 FOP KO (pool)		serum starved for 48 hours, fixed in 4% PFA at RT for 15 mintues	ARL13B, Proteintech, 17711-1-AP, 1:2000	CEP170, Invitrogen, 41-3200, 1:1000	Ac-Tub, 6B-11, Santa Cruz, 1:1000	DAPI	2021-05-21	No.3
KAN672-9	RPE-BFP-Cas9 sgIFT52#1		serum starved for 48 hours, fixed in 4% PFA at RT for 15 mintues	ARL13B, Proteintech, 17711-1-AP, 1:2000	CEP170, Invitrogen, 41-3200, 1:1000	Ac-Tub, 6B-11, Santa Cruz, 1:1000	DAPI	2021-05-21	No.3
KAN672-10	RPE-BFP-Cas9 sgSafe (pool)		serum starved for 48 hours, fixed in 4% PFA at RT for 15 mintues	ARL13B, Proteintech, 17711-1-AP, 1:2000	CEP170, Invitrogen, 41-3200, 1:1000	Ac-Tub, 6B-11, Santa Cruz, 1:1000	DAPI	2021-05-21	No.3
Exp.6
KAN672-11	RPE-BFP-Cas9 pMCB306 (pool)		serum starved for 48 hours, fixed in 4% PFA at RT for 15 mintues	ARL13B, Proteintech, 17711-1-AP, 1:2000	CEP170, Invitrogen, 41-3200, 1:1000	Ac-Tub, 6B-11, Santa Cruz, 1:1000	DAPI	2021-05-21	No.5
KAN672-12	RPE-BFP-Cas9 LRRC45 KO (pool)		serum starved for 48 hours, fixed in 4% PFA at RT for 15 mintues	ARL13B, Proteintech, 17711-1-AP, 1:2000	CEP170, Invitrogen, 41-3200, 1:1000	Ac-Tub, 6B-11, Santa Cruz, 1:1000	DAPI	2021-05-21	No.5
KAN672-13	RPE-BFP-Cas9 FOP KO (pool)		serum starved for 48 hours, fixed in 4% PFA at RT for 15 mintues	ARL13B, Proteintech, 17711-1-AP, 1:2000	CEP170, Invitrogen, 41-3200, 1:1000	Ac-Tub, 6B-11, Santa Cruz, 1:1000	DAPI	2021-05-21	No.5
KAN672-14	RPE-BFP-Cas9 sgSafe (pool)		serum starved for 48 hours, fixed in 4% PFA at RT for 15 mintues	ARL13B, Proteintech, 17711-1-AP, 1:2000	CEP170, Invitrogen, 41-3200, 1:1000	Ac-Tub, 6B-11, Santa Cruz, 1:1000	DAPI	2021-05-21	No.5

## Sheet: Statistics
Table Analyzed	Ciliation assay_48 hours		Table Analyzed	Ciliation assay_48 hours		Table Analyzed	Ciliation assay_48 hours		Table Analyzed	Ciliation assay_48 hours		Table Analyzed	Ciliation assay_48 hours		Table Analyzed	Ciliation assay_48 hours		Table Analyzed	Ciliation assay_48 hours		Table Analyzed	Ciliation assay_48 hours		Table Analyzed	Ciliation assay_48 hours		Table Analyzed	Ciliation assay_48 hours
Column B	CEP164 KO		Column C	CEP83 KO		Column D	SCLT1 KO		Column E	FBF1KO		Column F	CEP89KO		Column H	ANKRD26 KO		Column I	TTBK2 KO		Column J	INPP5E KO		Column K	KIZ KO		Column L	LRRC45 KO
vs.	vs.		vs.	vs.		vs.	vs.		vs.	vs.		vs.	vs.		vs.	vs.		vs.	vs.		vs.	vs.		vs.	vs.		vs.	vs.
Column A	pMCB306		Column A	pMCB306		Column A	pMCB306		Column A	pMCB306		Column A	pMCB306		Column A	pMCB306		Column A	pMCB306		Column A	pMCB306		Column A	pMCB306		Column A	pMCB306
Unpaired t test with Welch's correction			Unpaired t test with Welch's correction			Unpaired t test with Welch's correction			Unpaired t test with Welch's correction			Unpaired t test with Welch's correction			Unpaired t test with Welch's correction			Unpaired t test with Welch's correction			Unpaired t test with Welch's correction			Unpaired t test with Welch's correction			Unpaired t test with Welch's correction
P value	<0.0001		P value	<0.0001		P value	<0.0001		P value	0.0168		P value	0.0187		P value	0.0155		P value	<0.0001		P value	0.1881		P value	0.7132		P value	0.3397
P value summary	****		P value summary	****		P value summary	****		P value summary	*		P value summary	*		P value summary	*		P value summary	****		P value summary	ns		P value summary	ns		P value summary	ns
Significantly different (P < 0.05)?	Yes		Significantly different (P < 0.05)?	Yes		Significantly different (P < 0.05)?	Yes		Significantly different (P < 0.05)?	Yes		Significantly different (P < 0.05)?	Yes		Significantly different (P < 0.05)?	Yes		Significantly different (P < 0.05)?	Yes		Significantly different (P < 0.05)?	No		Significantly different (P < 0.05)?	No		Significantly different (P < 0.05)?	No
One- or two-tailed P value?	Two-tailed		One- or two-tailed P value?	Two-tailed		One- or two-tailed P value?	Two-tailed		One- or two-tailed P value?	Two-tailed		One- or two-tailed P value?	Two-tailed		One- or two-tailed P value?	Two-tailed		One- or two-tailed P value?	Two-tailed		One- or two-tailed P value?	Two-tailed		One- or two-tailed P value?	Two-tailed		One- or two-tailed P value?	Two-tailed
Welch-corrected t, df	t=45.17, df=5.000		Welch-corrected t, df	t=44.80, df=5.046		Welch-corrected t, df	t=43.18, df=5.100		Welch-corrected t, df	t=3.437, df=5.308		Welch-corrected t, df	t=3.217, df=5.896		Welch-corrected t, df	t=4.642, df=3.274		Welch-corrected t, df	t=45.17, df=5.000		Welch-corrected t, df	t=1.466, df=6.694		Welch-corrected t, df	t=0.3933, df=4.215		Welch-corrected t, df	t=1.030, df=6.517
How big is the difference?			How big is the difference?			How big is the difference?			How big is the difference?			How big is the difference?			How big is the difference?			How big is the difference?			How big is the difference?			How big is the difference?			How big is the difference?
Mean of column A	91.3		Mean of column A	91.3		Mean of column A	91.3		Mean of column A	91.3		Mean of column A	91.3		Mean of column A	91.3		Mean of column A	91.3		Mean of column A	91.3		Mean of column A	91.3		Mean of column A	91.3
Mean of column B	0		Mean of column C	0.5501		Mean of column D	3.581		Mean of column E	84.24		Mean of column F	82.27		Mean of column H	71.83		Mean of column I	0		Mean of column J	94.59		Mean of column K	89.95		Mean of column L	88.59
Difference between means (B - A) ± SEM	-91.30 ± 2.021		Difference between means (C - A) ± SEM	-90.75 ± 2.026		Difference between means (D - A) ± SEM	-87.71 ± 2.031		Difference between means (E - A) ± SEM	-7.055 ± 2.053		Difference between means (F - A) ± SEM	-9.027 ± 2.806		Difference between means (H - A) ± SEM	-19.46 ± 4.192		Difference between means (I - A) ± SEM	-91.30 ± 2.021		Difference between means (J - A) ± SEM	3.289 ± 2.244		Difference between means (K - A) ± SEM	-1.349 ± 3.430		Difference between means (L - A) ± SEM	-2.707 ± 2.628
95% confidence interval	-96.49 to -86.10		95% confidence interval	-95.94 to -85.55		95% confidence interval	-92.91 to -82.52		95% confidence interval	-12.24 to -1.869		95% confidence interval	-15.92 to -2.131		95% confidence interval	-32.19 to -6.730		95% confidence interval	-96.49 to -86.10		95% confidence interval	-2.067 to 8.646		95% confidence interval	-10.68 to 7.986		95% confidence interval	-9.017 to 3.603
R squared (eta squared)	0.9976		R squared (eta squared)	0.9975		R squared (eta squared)	0.9973		R squared (eta squared)	0.69		R squared (eta squared)	0.6371		R squared (eta squared)	0.8681		R squared (eta squared)	0.9976		R squared (eta squared)	0.2429		R squared (eta squared)	0.0354		R squared (eta squared)	0.14
F test to compare variances			F test to compare variances			F test to compare variances			F test to compare variances			F test to compare variances			F test to compare variances			F test to compare variances			F test to compare variances			F test to compare variances			F test to compare variances
F, DFn, Dfd	Infinity, 5, 2		F, DFn, Dfd	437.1, 5, 2		F, DFn, Dfd	197.6, 5, 2		F, DFn, Dfd	63.32, 5, 2		F, DFn, Dfd	2.156, 5, 2		F, DFn, Dfd	1.652, 2, 5		F, DFn, Dfd	Infinity, 5, 2		F, DFn, Dfd	8.576, 5, 2		F, DFn, Dfd	1.063, 5, 2		F, DFn, Dfd	2.893, 5, 2
P value	<0.0001		P value	0.0046		P value	0.0101		P value	0.0312		P value	0.693		P value	0.5628		P value	<0.0001		P value	0.2154		P value			P value	0.5532
P value summary	****		P value summary	**		P value summary	*		P value summary	*		P value summary	ns		P value summary	ns		P value summary	****		P value summary	ns		P value summary			P value summary	ns
Significantly different (P < 0.05)?	Yes		Significantly different (P < 0.05)?	Yes		Significantly different (P < 0.05)?	Yes		Significantly different (P < 0.05)?	Yes		Significantly different (P < 0.05)?	No		Significantly different (P < 0.05)?	No		Significantly different (P < 0.05)?	Yes		Significantly different (P < 0.05)?	No		Significantly different (P < 0.05)?	No		Significantly different (P < 0.05)?	No
Data analyzed			Data analyzed			Data analyzed			Data analyzed			Data analyzed			Data analyzed			Data analyzed			Data analyzed			Data analyzed			Data analyzed
Sample size, column A	6		Sample size, column A	6		Sample size, column A	6		Sample size, column A	6		Sample size, column A	6		Sample size, column A	6		Sample size, column A	6		Sample size, column A	6		Sample size, column A	6		Sample size, column A	6
Sample size, column B	3		Sample size, column C	3		Sample size, column D	3		Sample size, column E	3		Sample size, column F	3		Sample size, column H	3		Sample size, column I	3		Sample size, column J	3		Sample size, column K	3		Sample size, column L	3
Number of families	1
Number of comparisons per family	11
Alpha	0.05
Dunnett's multiple comparisons test	Mean Diff.	95.00% CI of diff.	Below threshold?	Summary	Adjusted P Value	A-?
pMCB306 vs. CEP164 KO	91.3	83.52 to 99.07	Yes	****	<0.0001	B	CEP164 KO
pMCB306 vs. CEP83 KO	90.75	82.97 to 98.52	Yes	****	<0.0001	C	CEP83 KO
pMCB306 vs. SCLT1 KO	87.71	79.94 to 95.49	Yes	****	<0.0001	D	SCLT1 KO
pMCB306 vs. FBF1KO	7.055	-0.7211 to 14.83	No	ns	0.0929	E	FBF1KO
pMCB306 vs. CEP89KO	9.027	1.251 to 16.80	Yes	*	0.0158	F	CEP89KO
pMCB306 vs. CCDC92KO	17.92	10.14 to 25.69	Yes	****	<0.0001	G	CCDC92KO
pMCB306 vs. ANKRD26 KO	19.46	11.69 to 27.24	Yes	****	<0.0001	H	ANKRD26 KO
pMCB306 vs. TTBK2 KO	91.3	83.52 to 99.07	Yes	****	<0.0001	I	TTBK2 KO
pMCB306 vs. INPP5E KO	-3.289	-11.07 to 4.487	No	ns	0.8541	J	INPP5E KO
pMCB306 vs. KIZ KO	1.349	-6.427 to 9.125	No	ns	0.9993	K	KIZ KO
pMCB306 vs. LRRC45 KO	2.707	-5.069 to 10.48	No	ns	0.9485	L	LRRC45 KO
Test details	Mean 1	Mean 2	Mean Diff.	SE of diff.	n1	n2	q	DF
pMCB306 vs. CEP164 KO	91.3	0	91.3	2.582	6	3	35.36	27
pMCB306 vs. CEP83 KO	91.3	0.5501	90.75	2.582	6	3	35.15	27
pMCB306 vs. SCLT1 KO	91.3	3.581	87.71	2.582	6	3	33.97	27
pMCB306 vs. FBF1KO	91.3	84.24	7.055	2.582	6	3	2.732	27
pMCB306 vs. CEP89KO	91.3	82.27	9.027	2.582	6	3	3.496	27
pMCB306 vs. CCDC92KO	91.3	73.38	17.92	2.582	6	3	6.94	27
pMCB306 vs. ANKRD26 KO	91.3	71.83	19.46	2.582	6	3	7.538	27
pMCB306 vs. TTBK2 KO	91.3	0	91.3	2.582	6	3	35.36	27
pMCB306 vs. INPP5E KO	91.3	94.59	-3.289	2.582	6	3	1.274	27
pMCB306 vs. KIZ KO	91.3	89.95	1.349	2.582	6	3	0.5226	27
pMCB306 vs. LRRC45 KO	91.3	88.59	2.707	2.582	6	3	1.048	27
