# Supplementary material for: A hierarchical pathway for assembly of the distal appendages that organize primary cilia
Source: eLife. 2025 Jan 30;14:e85999. doi: 10.7554/eLife.85999 (PMC11984956; doi:10.7554/eLife.85999)
Supplement: Figure 5—source data 3. [file elife-85999-fig5-data3.xlsx]

## Sheet: Raw data
sgGFP (pMCB306)							CEP164 KO							CEP83 KO							SCLT1 KO							FBF1 KO							CEP89 KO							CCDC92 KO							ANKRD26 KO
	Rab34+ centriole	cell counts	Dot	Extension	tunnel?	preciliary vesicle??		Rab34+ centriole	cell counts	Dot	Extension	tunnel?	preciliary vesicle??		Rab34+ centriole	cell counts	Dot	Extension	tunnel?	preciliary vesicle??		Rab34+ centriole	cell counts	Dot	Extension	tunnel?	preciliary vesicle??		Rab34+ centriole	cell counts	Dot	Extension	tunnel?	preciliary vesicle??		Rab34+ centriole	cell counts	Dot	Extension	preciliary vesicle + ciliary vesicle	preciliary vesicle without ciliary vesicle		Rab34+ centriole	cell counts	Dot	Extension	preciliary vesicle + ciliary vesicle	preciliary vesicle without ciliary vesicle
KAN544-1		7	2				KAN544-2		15	0				KAN544-3		17	1				KAN544-4		12	0				KAN544-5		16	2				KAN544-6		12	0				KAN544-7		16	3	2			KAN544-8
2		12	5				2		14	0				2		19	0				2		11	0				2		12	1				2		17	0				2		14	2				2
3		10	0				3		20	0				3		9	0				3		10	0				3		14	4				3		10	1	1			3		12	2				3
4		8	3	1			4		15	0				4		12	0				4		10	0				4		14	0				4		18	1				4		14	1				4
5		11	2	1			5		12	0				5		20	0				5		10	0				5		12	3	1			5		16	2				5		14	2				5
6		9	2				6		15	0				6		16	0				6		11	0				6		10	0				6		16	1				6		13	2				6
7		8	1				7		13	0				7		16	0				7		11	0				7		13	0				7		11	1				7		13		2			7
8		11	3	1			8		12	0				8		10	0				8		12	0				8		11	2				8		13	2				8		13	0				8
9							9							9							9							9							9							9							9
10							10							10							10							10							10							10							10
	21	76	18	3	0	0		0	116	0	0	0	0		1	119	1	0	0	0		0	87	0	0	0	0		13	102	12	1	0	0		9	113	8	1	0	0		16	109	12	4	0	0
		27.6316	23.6842	3.94737					0	0	0					0.840336	0.840336	0					0	0	0					12.7451	11.7647	0.980392					7.9646	7.07965	0.884956					14.6789	11.0092	3.66972
	Rab34+ centriole	cell counts	Dot	Extension	tunnel?	preciliary vesicle??		Rab34+ centriole	cell counts	Dot	Extension	tunnel?	preciliary vesicle??		Rab34+ centriole	cell counts	Dot	Extension	tunnel?	preciliary vesicle??		Rab34+ centriole	cell counts	Dot	Extension	tunnel?	preciliary vesicle??		Rab34+ centriole	cell counts	Dot	Extension	tunnel?	preciliary vesicle??		Rab34+ centriole	cell counts	Dot	Extension	preciliary vesicle + ciliary vesicle	preciliary vesicle without ciliary vesicle		Rab34+ centriole	cell counts	Dot	Extension	preciliary vesicle + ciliary vesicle	preciliary vesicle without ciliary vesicle
KAN568-1		13	6				KAN568-2		9	0				KAN568-3		14	0				KAN568-4		11	0				KAN568-5		10	0				KAN568-6		11	0				KAN568-7		16	3	1			KAN568-8
2		17	3				2		13	0				2		13	0				2		14	1				2		11	5				2		14	2	1			2		16	6				2
3		15	3				3		13	0				3		15	0				3		11	0				3		10	2				3		14	2				3		15	2				3
4		8	3	1			4		16	0				4		13	0				4		11	0				4		11	4				4		11	1				4		14	4	2			4
5		20	5				5		10	1				5		24	0				5		11	0				5		10	0				5		20	3				5		10	4	2			5
6		17	4	2			6		13	0				6		15	0				6		13	1				6		12	1				6		14	1				6		12	3				6
7		15	2				7		15	0				7		15	0				7		13	0				7		16	4				7		15	3				7		13	6				7
8		19	3	4			8		9	0				8		16	0				8		10	0				8		11	2				8		17	5	1			8		12	5	1			8
9							9							9							9							9							9							9							9
10							10							10							10							10							10							10							10
	36	124	29	7	0	0		1	98	1	0	0	0		0	125	0	0	0	0		2	94	2	0	0	0		18	91	18	0	0	0		19	116	17	2	0	0		39	108	33	6	0	0
		29.0323	23.3871	5.64516					1.02041	1.02041	0					0	0	0					2.12766	2.12766	0					19.7802	19.7802	0					16.3793	14.6552	1.72414					36.1111	30.5556	5.55556
	Rab34+ centriole	cell counts	Dot	Extension	tunnel?	preciliary vesicle??		Rab34+ centriole	cell counts	Dot	Extension	tunnel?	preciliary vesicle??		Rab34+ centriole	cell counts	Dot	Extension	tunnel?	preciliary vesicle??		Rab34+ centriole	cell counts	Dot	Extension	tunnel?	preciliary vesicle??		Rab34+ centriole	cell counts	Dot	Extension	tunnel?	preciliary vesicle??		Rab34+ centriole	cell counts	Dot	Extension	tunnel?	preciliary vesicle??		Rab34+ centriole	cell counts	Dot	Extension	tunnel?	preciliary vesicle??
KAN569-1		10	5				KAN569-2		11	0				KAN569-3		13	0				KAN569-4		9	0				KAN569-5		8	1				KAN569-6		13	0				KAN569-7		15	4				KAN569-8
2		13	6				2		14	0				2		13	0				2		12	0				2		8	0				2		13	0				2		16	3				2
3		13	4				3		15	0				3		10	0				3		8	0				3		14	3	1			3		10	0				3		12	2				3
4		12	2	1			4		14	0				4		12	0				4		8	1				4		13	2				4		16	2				4		14	1				4
5		10	5				5		21	0				5		15	0				5		8	0				5		10		1			5		15	1				5		10	2				5
6		10	4				6		9	0				6		12	0				6		10	0				6		12	2				6		11	0				6		7	3				6
7		12	6				7		14	0				7		14	0				7		9	0				7		13	1				7		17	1				7		14	4	1			7
8		11	3				8		15	0				8		13	0				8		9	0				8		16	3	1			8		17	2				8		14	7				8
9							9							9							9							9							9							9							9
10							10							10							10							10							10							10							10
	36	91	35	1	0	0		0	113	0	0	0	0		0	102	0	0	0	0		1	73	1	0	0	0		15	94	12	3	0	0		6	112	6	0	0	0		27	102	26	1	0	0
		39.5604	38.4615	1.0989					0	0	0					0	0	0					1.36986	1.36986	0					15.9574	12.766	3.19149					5.35714	5.35714	0					26.4706	25.4902	0.980392
	Rab34+ centriole	cell counts	Dot	Extension	tunnel?	preciliary vesicle??		Rab34+ centriole	cell counts	Dot	Extension	tunnel?	preciliary vesicle??		Rab34+ centriole	cell counts	Dot	Extension	tunnel?	preciliary vesicle??		Rab34+ centriole	cell counts	Dot	Extension	tunnel?	preciliary vesicle??		Rab34+ centriole	cell counts	Dot	Extension	tunnel?	preciliary vesicle??		Rab34+ centriole	cell counts	Dot	Extension	tunnel?	preciliary vesicle??		Rab34+ centriole	cell counts	Dot	Extension	tunnel?	preciliary vesicle??
KAN588-1	0	9					KAN588-2	0	12					KAN588-3	0	12					KAN588-4	0	14					KAN588-5	2	11	2				KAN588-6	1	11	1				KAN588-7	4	9	4				KAN588-8
2	3	9	3				2	0	6					2	0	13					2	0	9					2	3	12	3				2	2	11	2				2	1	10	1				2
3	1	13	1				3	0	12					3	0	9					3	0	10					3	3	11	2	1			3	1	9	1				3	1	10	1				3
4	4	14	4				4	0	12					4	0	12					4	0	9					4	1	9	1				4	1	10	1				4	4	8	4				4
5	6	10	6				5	0	12					5	0	10					5	0	11					5	3	13	3				5	2	9	2				5	3	9	3				5
6	4	10	4				6	0	8					6	0	11					6	0	13					6	0	7					6	1	13	1				6	2	9	2				6
7	2	10	2				7	0						7	0						7	0						7	1	8	1				7	1	8	1				7	4	10	4				7
8	3	15	3				8	0						8	0						8	0						8	1	8	1				8	0	14					8	2	14	2				8
9	0						9	0						9	0						9	0						9	0						9	0						9	0						9
10	0						10	0						10	0						10	0						10	0						10	0						10	0						10
	23	90	23	0	0	0		0	62	0	0	0	0		0	67	0	0	0	0		0	66	0	0	0	0		14	79	13	1	0	0		9	85	9	0	0	0		21	79	21	0	0	0
		25.5556	25.5556	0					0	0	0					0	0	0					0	0	0					17.7215	16.4557	1.26582					10.5882	10.5882	0					26.5823	26.5823	0
	Rab34+ centriole	cell counts	Dot	Extension	tunnel?	preciliary vesicle??		Rab34+ centriole	cell counts	Dot	Extension	tunnel?	preciliary vesicle??		Rab34+ centriole	cell counts	Dot	Extension	tunnel?	preciliary vesicle??		Rab34+ centriole	cell counts	Dot	Extension	tunnel?	preciliary vesicle??		Rab34+ centriole	cell counts	Dot	Extension	tunnel?	preciliary vesicle??		Rab34+ centriole	cell counts	Dot	Extension	tunnel?	preciliary vesicle??		Rab34+ centriole	cell counts	Dot	Extension	tunnel?	preciliary vesicle??
KAN592-1	2	7	2				KAN592-2	0	12					KAN592-3	1	9	1				KAN592-4	0	15					KAN592-5	2	7		2			KAN592-6	4	11	4				KAN592-7	5	10	5				KAN592-8
2	2	9	2				2	0	10					2	0	8	0				2	0	11					2	3	9	3				2	1	13	1				2	4	8	4				2
3	4	10	4				3	0	12					3	0	12					3	1	13	1				3	2	7	2				3	1	8	1				3	5	10	5				3
4	2	7	2				4	0	16					4	0	8	0				4	0	14					4	2	12	2				4	0	8					4	3	12	3				4
5	3	11	3				5	0	16					5	0	8					5	0	13					5	1	11	1				5	1	14	1				5	1	10	1				5
6	1	11	1				6	0	13					6	0	11					6	0	13					6	0	7	0				6	0	12					6	1	10	1				6
7	0	12					7	0						7	0						7	0						7	3	11	3				7	1	9	1				7	3	10	3				7
8	4	10	4				8	0						8	0						8	0						8	1	12	1				8	1	12	1				8	5	11	5				8
9	0	11					9	0						9	0						9	0						9	0						9	0						9	0						9
10	0						10	0						10	0						10	0						10	0						10	0						10	0						10
	18	88	18	0	0	0		0	79	0	0	0	0		1	56	1	0	0	0		1	79	1	0	0	0		14	76	12	2	0	0		9	87	9	0	0	0		27	81	27	0	0	0
		20.4545	20.4545	0					0	0	0					1.78571	1.78571	0					1.26582	1.26582	0					18.4211	15.7895	2.63158					10.3448	10.3448	0					33.3333	33.3333	0
	Rab34+ centriole	cell counts	Dot	Extension	tunnel?	preciliary vesicle??		Rab34+ centriole	cell counts	Dot	Extension	tunnel?	preciliary vesicle??		Rab34+ centriole	cell counts	Dot	Extension	tunnel?	preciliary vesicle??		Rab34+ centriole	cell counts	Dot	Extension	tunnel?	preciliary vesicle??		Rab34+ centriole	cell counts	Dot	Extension	tunnel?	preciliary vesicle??		Rab34+ centriole	cell counts	Dot	Extension	tunnel?	preciliary vesicle??		Rab34+ centriole	cell counts	Dot	Extension	tunnel?	preciliary vesicle??
KAN611-1		20	7				KAN611-2		18	0				KAN611-3		16	0				KAN611-4		16	0				KAN611-5		18	5				KAN611-6		25	4				KAN611-7		21	3	1			KAN611-8
2		15	6				2		17	0				2		16	0				2		17	0				2		13	1				2		21	1				2		18	4	1			2
3		19	6				3		18	0				3		16	0				3		28	2				3		17	6	1			3		15	1				3		17	2				3
4		16	3				4		20	0				4		18	0				4		20	1				4		17	6				4		21	5				4		20	1				4
5		15	5	1			5							5		22	0				5		19	3				5		19	4				5		21	2				5		21	6				5
6		14	3				6							6		16	0				6		22	2				6		18	1				6		15	1				6		19	5				6
7		13	4	1			7							7							7							7		20	3	3			7		18	0				7		23	2				7
8		15	5	2			8							8							8							8		14	3	1			8		12	1				8		15	5				8
9							9							9							9							9							9							9							9
10							10							10							10							10							10							10							10
	43	127	39	4	0	0		0	73	0	0	0	0		0	104	0	0	0	0		8	122	8	0	0	0		34	136	29	5	0	0		15	148	15	0	0	0		30	154	28	2	0	0
		33.8583	30.7087	3.14961					0	0	0					0	0	0					6.55738	6.55738	0					25	21.3235	3.67647					10.1351	10.1351	0					19.4805	18.1818	1.2987
	Rab34+ centriole	cell counts	Dot	Extension	tunnel?	preciliary vesicle??
KAN646-1		12	3
2		11	3
3		14	4
4		12	5	2
5		13	2	1
6		9	6
7		13	5
8		13	3	1
9
10
	35	97	31	4	0	0
		36.0825	31.9588	4.12371
	Rab34+ centriole	cell counts	Dot	Extension	tunnel?	preciliary vesicle??
KAN646-6		15	4	1
2		15	5
3		11	2
4		13	2
5		20	5
6		14	2	2
7		14	4
8		16	1
9
10
	28	118	25	3	0	0
		23.7288	21.1864	2.54237
	Rab34+ centriole	cell counts	Dot	Extension	tunnel?	preciliary vesicle??
KAN646-11		14	5
2		18	7	1
3		12	3
4		16	4
5		16	4
6		17	3
7		14	5
8		19	5
9
10
	37	126	36	1	0	0
		29.3651	28.5714	0.793651
	Rab34+ centriole	cell counts	Dot	Extension	tunnel?	preciliary vesicle??
KAN668-1		18	3	1
2		18	2	2
3		15	5
4		20	7	1
5		22	3
6		12	6
7
8
9
10
	30	105	26	4	0	0
		28.5714	24.7619	3.80952
	Rab34+ centriole	cell counts	Dot	Extension	tunnel?	preciliary vesicle??
KAN668-6		17	6
2		13	2
3		16	3	1
4		10	2
5		12	4
6		20	4	2
7		18	6
8		16	3
9
10
	33	122	30	3	0	0
		27.0492	24.5902	2.45902
								Rab34+ centriole	cell counts	Dot	Extension	tunnel?	preciliary vesicle??		Rab34+ centriole	cell counts	Dot	Extension	tunnel?	preciliary vesicle??		Rab34+ centriole	cell counts	Dot	Extension	tunnel?	preciliary vesicle??		Rab34+ centriole	cell counts	Dot	Extension	tunnel?	preciliary vesicle??		Rab34+ centriole	cell counts	Dot	Extension	tunnel?	preciliary vesicle??		Rab34+ centriole	cell counts	Dot	Extension	tunnel?	preciliary vesicle??
							KAN695-2		17	0				KAN695-3		19	0				KAN695-4		18	0				KAN695-5		15	5				KAN695-6		18	1				KAN695-7		16	3	1			KAN695-8
							2		16	0				2		15	0				2		16	0				2		14	2	1			2		24	5				2		14	4				2
							3		19	0				3		23	0				3		20	1				3		16	5				3		22	2				3		18	6				3
							4		19	0				4		18	0				4		13	1				4		15	3	1			4		14	0				4		18	2	1			4
							5		18	0				5		17	0				5		19	0				5		10	2				5		19	1				5		19	3				5
							6		17	0				6		23	0				6		17	0				6		12	3				6		16	2				6		22	3				6
							7		15	0				7		13	0				7		11	0				7		20	5				7		17	0				7		21	3				7
							8		19	0				8		14	0				8		17	0				8		13	1				8		19	2				8		14	3				8
							9							9							9							9							9							9							9
							10							10							10							10							10							10							10
								0	140	0	0	0	0		0	142	0	0	0	0		2	131	2	0	0	0		28	115	26	2	0	0		13	149	13	0	0	0		29	142	27	2	0	0
									0	0	0					0	0	0					1.52672	1.52672	0					24.3478	22.6087	1.73913					8.72483	8.72483	0					20.4225	19.0141	1.40845
								Rab34+ centriole	cell counts	Dot	Extension	tunnel?	preciliary vesicle??		Rab34+ centriole	cell counts	Dot	Extension	tunnel?	preciliary vesicle??		Rab34+ centriole	cell counts	Dot	Extension	tunnel?	preciliary vesicle??		Rab34+ centriole	cell counts	Dot	Extension	tunnel?	preciliary vesicle??		Rab34+ centriole	cell counts	Dot	Extension	tunnel?	preciliary vesicle??		Rab34+ centriole	cell counts	Dot	Extension	tunnel?	preciliary vesicle??
							KAN701-2		18	1				KAN701-3		20	0				KAN701-4		15	0				KAN701-5		21	3				KAN701-6		22	5				KAN701-7		18	1				KAN701-8
							2		18	0				2		22	0				2		19	0				2		20	7	1			2		25	4				2		24	4				2
							3		18	0				3		14	0				3		15	2				3		21	5				3		19	3				3		19	3				3
							4		19	0				4		19	0				4		13	1				4		19	6				4		20	4				4		19	7				4
							5		25	0				5		22	0				5		13	0				5		20	4				5		16	1				5		22	5				5
							6		20	0				6		23	0				6		18	1				6		18	6				6		17	4	1			6		19	3				6
							7		15	1				7		18	0				7		15	0				7		21	4	3			7		21	2				7		20	4				7
							8		17	0				8		12	0				8		16	0				8		17	6				8		20	5				8		21	5				8
							9							9							9							9							9							9							9
							10							10							10							10							10							10							10
								2	150	2	0	0	0		0	150	0	0	0	0		4	124	4	0	0	0		45	157	41	4	0	0		29	160	28	1	0	0		32	162	32	0	0	0
									1.33333	1.33333	0					0	0	0					3.22581	3.22581	0					28.6624	26.1146	2.54777					18.125	17.5	0.625					19.7531	19.7531	0
[truncated: 37 more columns]

## Sheet: IF condition
Exp. number	Cell line	Culture condition	Fixation condition	mouse IgG2a-Alexa488	rabbit-Alexa568	mouse IgG1-Alexa647	Nuclear stain	Date	Replicate
Exp.1
KAN544-1	RPE-BFP-Cas9 pMCB306 (pool)	Confluent	Fixed in 4% PFA for 15 minutes at RT	Myosin Va, sc-365986, Santa Cruz, 1:1000	Rab34, 27435-1-AP, Proteintech, 1:500	CEP170, Invitrogen, 41-3200, 1:500	DAPI	2020-10-16	No.1
KAN544-2	RPE-BFP-Cas9 CEP164KO (pool)	Confluent	Fixed in 4% PFA for 15 minutes at RT	Myosin Va, sc-365986, Santa Cruz, 1:1000	Rab34, 27435-1-AP, Proteintech, 1:500	CEP170, Invitrogen, 41-3200, 1:500	DAPI	2020-10-16	No.1
KAN544-3	RPE-BFP-Cas9 CEP83 KO (pool)	Confluent	Fixed in 4% PFA for 15 minutes at RT	Myosin Va, sc-365986, Santa Cruz, 1:1000	Rab34, 27435-1-AP, Proteintech, 1:500	CEP170, Invitrogen, 41-3200, 1:500	DAPI	2020-10-16	No.1
KAN544-4	RPE-BFP-Cas9 SCLT1 KO (pool)	Confluent	Fixed in 4% PFA for 15 minutes at RT	Myosin Va, sc-365986, Santa Cruz, 1:1000	Rab34, 27435-1-AP, Proteintech, 1:500	CEP170, Invitrogen, 41-3200, 1:500	DAPI	2020-10-16	No.1
KAN544-5	RPE-BFP-Cas9 FBF1 KO (pool)	Confluent	Fixed in 4% PFA for 15 minutes at RT	Myosin Va, sc-365986, Santa Cruz, 1:1000	Rab34, 27435-1-AP, Proteintech, 1:500	CEP170, Invitrogen, 41-3200, 1:500	DAPI	2020-10-16	No.1
KAN544-6	RPE-BFP-Cas9 CEP89KO (pool)	Confluent	Fixed in 4% PFA for 15 minutes at RT	Myosin Va, sc-365986, Santa Cruz, 1:1000	Rab34, 27435-1-AP, Proteintech, 1:500	CEP170, Invitrogen, 41-3200, 1:500	DAPI	2020-10-16	No.1
KAN544-7	RPE-BFP-Cas9 CCDC92 KO (pool)	Confluent	Fixed in 4% PFA for 15 minutes at RT	Myosin Va, sc-365986, Santa Cruz, 1:1000	Rab34, 27435-1-AP, Proteintech, 1:500	CEP170, Invitrogen, 41-3200, 1:500	DAPI	2020-10-16	No.1
KAN544-8	RPE-BFP-Cas9 ANKRD26 KO (pool)	Confluent	Fixed in 4% PFA for 15 minutes at RT	Myosin Va, sc-365986, Santa Cruz, 1:1000	Rab34, 27435-1-AP, Proteintech, 1:500	CEP170, Invitrogen, 41-3200, 1:500	DAPI	2020-10-16	No.1
KAN544-9	RPE-BFP-Cas9 TTBK2 KO (pool)	Confluent	Fixed in 4% PFA for 15 minutes at RT	Myosin Va, sc-365986, Santa Cruz, 1:1000	Rab34, 27435-1-AP, Proteintech, 1:500	CEP170, Invitrogen, 41-3200, 1:500	DAPI	2020-10-16	No.1
KAN544-10	RPE-BFP-Cas9 INPP5E KO (pool)	Confluent	Fixed in 4% PFA for 15 minutes at RT	Myosin Va, sc-365986, Santa Cruz, 1:1000	Rab34, 27435-1-AP, Proteintech, 1:500	CEP170, Invitrogen, 41-3200, 1:500	DAPI	2020-10-16	No.1
KAN544-11	RPE-BFP-Cas9 Kiz KO (pool)	Confluent	Fixed in 4% PFA for 15 minutes at RT	Myosin Va, sc-365986, Santa Cruz, 1:1000	Rab34, 27435-1-AP, Proteintech, 1:500	CEP170, Invitrogen, 41-3200, 1:500	DAPI	2020-10-16	No.1
KAN544-12	RPE-BFP-Cas9 sgPDE6D#1	Confluent	Fixed in 4% PFA for 15 minutes at RT	Myosin Va, sc-365986, Santa Cruz, 1:1000	Rab34, 27435-1-AP, Proteintech, 1:500	CEP170, Invitrogen, 41-3200, 1:500	DAPI	2020-10-16	No.1
KAN544-13	RPE-BFP-Cas9 sgLRRC45#1	Confluent	Fixed in 4% PFA for 15 minutes at RT	Myosin Va, sc-365986, Santa Cruz, 1:1000	Rab34, 27435-1-AP, Proteintech, 1:500	CEP170, Invitrogen, 41-3200, 1:500	DAPI	2020-10-16	No.1
Exp.2
KAN568-1	RPE-BFP-Cas9 pMCB306 (pool)	Confluent	Fixed in 4% PFA for 15 minutes at RT	Myosin Va, sc-365986, Santa Cruz, 1:1000	Rab34, 27435-1-AP, Proteintech, 1:1000	CEP170, Invitrogen, 41-3200, 1:1000	DAPI	2020-10-26	No.2
KAN568-2	RPE-BFP-Cas9 CEP164KO (pool)	Confluent	Fixed in 4% PFA for 15 minutes at RT	Myosin Va, sc-365986, Santa Cruz, 1:1000	Rab34, 27435-1-AP, Proteintech, 1:1000	CEP170, Invitrogen, 41-3200, 1:1000	DAPI	2020-10-26	No.2
KAN568-3	RPE-BFP-Cas9 CEP83 KO (pool)	Confluent	Fixed in 4% PFA for 15 minutes at RT	Myosin Va, sc-365986, Santa Cruz, 1:1000	Rab34, 27435-1-AP, Proteintech, 1:1000	CEP170, Invitrogen, 41-3200, 1:1000	DAPI	2020-10-26	No.2
KAN568-4	RPE-BFP-Cas9 SCLT1 KO (pool)	Confluent	Fixed in 4% PFA for 15 minutes at RT	Myosin Va, sc-365986, Santa Cruz, 1:1000	Rab34, 27435-1-AP, Proteintech, 1:1000	CEP170, Invitrogen, 41-3200, 1:1000	DAPI	2020-10-26	No.2
KAN568-5	RPE-BFP-Cas9 FBF1 KO (pool)	Confluent	Fixed in 4% PFA for 15 minutes at RT	Myosin Va, sc-365986, Santa Cruz, 1:1000	Rab34, 27435-1-AP, Proteintech, 1:1000	CEP170, Invitrogen, 41-3200, 1:1000	DAPI	2020-10-26	No.2
KAN568-6	RPE-BFP-Cas9 CEP89KO (pool)	Confluent	Fixed in 4% PFA for 15 minutes at RT	Myosin Va, sc-365986, Santa Cruz, 1:1000	Rab34, 27435-1-AP, Proteintech, 1:1000	CEP170, Invitrogen, 41-3200, 1:1000	DAPI	2020-10-26	No.2
KAN568-7	RPE-BFP-Cas9 CCDC92 KO (pool)	Confluent	Fixed in 4% PFA for 15 minutes at RT	Myosin Va, sc-365986, Santa Cruz, 1:1000	Rab34, 27435-1-AP, Proteintech, 1:1000	CEP170, Invitrogen, 41-3200, 1:1000	DAPI	2020-10-26	No.2
KAN568-8	RPE-BFP-Cas9 ANKRD26 KO (pool)	Confluent	Fixed in 4% PFA for 15 minutes at RT	Myosin Va, sc-365986, Santa Cruz, 1:1000	Rab34, 27435-1-AP, Proteintech, 1:1000	CEP170, Invitrogen, 41-3200, 1:1000	DAPI	2020-10-26	No.2
KAN568-9	RPE-BFP-Cas9 TTBK2 KO (pool)	Confluent	Fixed in 4% PFA for 15 minutes at RT	Myosin Va, sc-365986, Santa Cruz, 1:1000	Rab34, 27435-1-AP, Proteintech, 1:1000	CEP170, Invitrogen, 41-3200, 1:1000	DAPI	2020-10-26	No.2
KAN568-10	RPE-BFP-Cas9 INPP5E KO (pool)	Confluent	Fixed in 4% PFA for 15 minutes at RT	Myosin Va, sc-365986, Santa Cruz, 1:1000	Rab34, 27435-1-AP, Proteintech, 1:1000	CEP170, Invitrogen, 41-3200, 1:1000	DAPI	2020-10-26	No.2
KAN568-11	RPE-BFP-Cas9 Kiz KO (pool)	Confluent	Fixed in 4% PFA for 15 minutes at RT	Myosin Va, sc-365986, Santa Cruz, 1:1000	Rab34, 27435-1-AP, Proteintech, 1:1000	CEP170, Invitrogen, 41-3200, 1:1000	DAPI	2020-10-26	No.2
KAN568-12	RPE-BFP-Cas9 sgPDE6D#1	Confluent	Fixed in 4% PFA for 15 minutes at RT	Myosin Va, sc-365986, Santa Cruz, 1:1000	Rab34, 27435-1-AP, Proteintech, 1:1000	CEP170, Invitrogen, 41-3200, 1:1000	DAPI	2020-10-26	No.2
KAN568-13	RPE-BFP-Cas9 sgLRRC45#1	Confluent	Fixed in 4% PFA for 15 minutes at RT	Myosin Va, sc-365986, Santa Cruz, 1:1000	Rab34, 27435-1-AP, Proteintech, 1:1000	CEP170, Invitrogen, 41-3200, 1:1000	DAPI	2020-10-26	No.3
Exp.3
KAN569-1	RPE-BFP-Cas9 pMCB306 (pool)	Confluent	Fixed in 4% PFA for 15 minutes at RT	Myosin Va, sc-365986, Santa Cruz, 1:1000	Rab34, 27435-1-AP, Proteintech, 1:1000	CEP170, Invitrogen, 41-3200, 1:1000	DAPI	2020-10-26	No.3
KAN569-2	RPE-BFP-Cas9 CEP164KO (pool)	Confluent	Fixed in 4% PFA for 15 minutes at RT	Myosin Va, sc-365986, Santa Cruz, 1:1000	Rab34, 27435-1-AP, Proteintech, 1:1000	CEP170, Invitrogen, 41-3200, 1:1000	DAPI	2020-10-26	No.3
KAN569-3	RPE-BFP-Cas9 CEP83 KO (pool)	Confluent	Fixed in 4% PFA for 15 minutes at RT	Myosin Va, sc-365986, Santa Cruz, 1:1000	Rab34, 27435-1-AP, Proteintech, 1:1000	CEP170, Invitrogen, 41-3200, 1:1000	DAPI	2020-10-26	No.3
KAN569-4	RPE-BFP-Cas9 SCLT1 KO (pool)	Confluent	Fixed in 4% PFA for 15 minutes at RT	Myosin Va, sc-365986, Santa Cruz, 1:1000	Rab34, 27435-1-AP, Proteintech, 1:1000	CEP170, Invitrogen, 41-3200, 1:1000	DAPI	2020-10-26	No.3
KAN569-5	RPE-BFP-Cas9 FBF1 KO (pool)	Confluent	Fixed in 4% PFA for 15 minutes at RT	Myosin Va, sc-365986, Santa Cruz, 1:1000	Rab34, 27435-1-AP, Proteintech, 1:1000	CEP170, Invitrogen, 41-3200, 1:1000	DAPI	2020-10-26	No.3
KAN569-6	RPE-BFP-Cas9 CEP89KO (pool)	Confluent	Fixed in 4% PFA for 15 minutes at RT	Myosin Va, sc-365986, Santa Cruz, 1:1000	Rab34, 27435-1-AP, Proteintech, 1:1000	CEP170, Invitrogen, 41-3200, 1:1000	DAPI	2020-10-26	No.3
KAN569-7	RPE-BFP-Cas9 CCDC92 KO (pool)	Confluent	Fixed in 4% PFA for 15 minutes at RT	Myosin Va, sc-365986, Santa Cruz, 1:1000	Rab34, 27435-1-AP, Proteintech, 1:1000	CEP170, Invitrogen, 41-3200, 1:1000	DAPI	2020-10-26	No.3
KAN569-8	RPE-BFP-Cas9 ANKRD26 KO (pool)	Confluent	Fixed in 4% PFA for 15 minutes at RT	Myosin Va, sc-365986, Santa Cruz, 1:1000	Rab34, 27435-1-AP, Proteintech, 1:1000	CEP170, Invitrogen, 41-3200, 1:1000	DAPI	2020-10-26	No.3
KAN569-9	RPE-BFP-Cas9 TTBK2 KO (pool)	Confluent	Fixed in 4% PFA for 15 minutes at RT	Myosin Va, sc-365986, Santa Cruz, 1:1000	Rab34, 27435-1-AP, Proteintech, 1:1000	CEP170, Invitrogen, 41-3200, 1:1000	DAPI	2020-10-26	No.3
KAN569-10	RPE-BFP-Cas9 INPP5E KO (pool)	Confluent	Fixed in 4% PFA for 15 minutes at RT	Myosin Va, sc-365986, Santa Cruz, 1:1000	Rab34, 27435-1-AP, Proteintech, 1:1000	CEP170, Invitrogen, 41-3200, 1:1000	DAPI	2020-10-26	No.3
KAN569-11	RPE-BFP-Cas9 Kiz KO (pool)	Confluent	Fixed in 4% PFA for 15 minutes at RT	Myosin Va, sc-365986, Santa Cruz, 1:1000	Rab34, 27435-1-AP, Proteintech, 1:1000	CEP170, Invitrogen, 41-3200, 1:1000	DAPI	2020-10-26	No.3
KAN569-12	RPE-BFP-Cas9 sgPDE6D#1	Confluent	Fixed in 4% PFA for 15 minutes at RT	Myosin Va, sc-365986, Santa Cruz, 1:1000	Rab34, 27435-1-AP, Proteintech, 1:1000	CEP170, Invitrogen, 41-3200, 1:1000	DAPI	2020-10-26	No.3
KAN569-13	RPE-BFP-Cas9 sgLRRC45#1	Confluent	Fixed in 4% PFA for 15 minutes at RT	Myosin Va, sc-365986, Santa Cruz, 1:1000	Rab34, 27435-1-AP, Proteintech, 1:1000	CEP170, Invitrogen, 41-3200, 1:1000	DAPI	2020-10-26	No.3
Exp.3
KAN588-1	RPE-BFP-Cas9 pMCB306 (pool)		Confluent, fixed in 4% PFA for 15 minutes at RT	Myosin Va, sc-365986, Santa Cruz, 1:1000	Rab34, 27435-1-AP, Proteintech, 1:1000	CEP170, Invitrogen, 41-3200, 1:1000	DAPI		2020-11-19	No.4
KAN588-2	RPE-BFP-Cas9 CEP164KO (pool)		Confluent, fixed in 4% PFA for 15 minutes at RT	Myosin Va, sc-365986, Santa Cruz, 1:1000	Rab34, 27435-1-AP, Proteintech, 1:1000	CEP170, Invitrogen, 41-3200, 1:1000	DAPI		2020-11-19	No.4
KAN588-3	RPE-BFP-Cas9 CEP83 KO (pool)		Confluent, fixed in 4% PFA for 15 minutes at RT	Myosin Va, sc-365986, Santa Cruz, 1:1000	Rab34, 27435-1-AP, Proteintech, 1:1000	CEP170, Invitrogen, 41-3200, 1:1000	DAPI		2020-11-19	No.4
KAN588-4	RPE-BFP-Cas9 SCLT1 KO (pool)		Confluent, fixed in 4% PFA for 15 minutes at RT	Myosin Va, sc-365986, Santa Cruz, 1:1000	Rab34, 27435-1-AP, Proteintech, 1:1000	CEP170, Invitrogen, 41-3200, 1:1000	DAPI		2020-11-19	No.4
KAN588-5	RPE-BFP-Cas9 FBF1 KO (pool)		Confluent, fixed in 4% PFA for 15 minutes at RT	Myosin Va, sc-365986, Santa Cruz, 1:1000	Rab34, 27435-1-AP, Proteintech, 1:1000	CEP170, Invitrogen, 41-3200, 1:1000	DAPI		2020-11-19	No.4
KAN588-6	RPE-BFP-Cas9 CEP89KO (pool)		Confluent, fixed in 4% PFA for 15 minutes at RT	Myosin Va, sc-365986, Santa Cruz, 1:1000	Rab34, 27435-1-AP, Proteintech, 1:1000	CEP170, Invitrogen, 41-3200, 1:1000	DAPI		2020-11-19	No.4
KAN588-7	RPE-BFP-Cas9 CCDC92 KO (pool)		Confluent, fixed in 4% PFA for 15 minutes at RT	Myosin Va, sc-365986, Santa Cruz, 1:1000	Rab34, 27435-1-AP, Proteintech, 1:1000	CEP170, Invitrogen, 41-3200, 1:1000	DAPI		2020-11-19	No.4
KAN588-8	RPE-BFP-Cas9 ANKRD26 KO (pool)		Confluent, fixed in 4% PFA for 15 minutes at RT	Myosin Va, sc-365986, Santa Cruz, 1:1000	Rab34, 27435-1-AP, Proteintech, 1:1000	CEP170, Invitrogen, 41-3200, 1:1000	DAPI		2020-11-19	No.4
KAN588-9	RPE-BFP-Cas9 TTBK2 KO (pool)		Confluent, fixed in 4% PFA for 15 minutes at RT	Myosin Va, sc-365986, Santa Cruz, 1:1000	Rab34, 27435-1-AP, Proteintech, 1:1000	CEP170, Invitrogen, 41-3200, 1:1000	DAPI		2020-11-19	No.4
KAN588-10	RPE-BFP-Cas9 INPP5E KO (pool)		Confluent, fixed in 4% PFA for 15 minutes at RT	Myosin Va, sc-365986, Santa Cruz, 1:1000	Rab34, 27435-1-AP, Proteintech, 1:1000	CEP170, Invitrogen, 41-3200, 1:1000	DAPI		2020-11-19	No.4
KAN588-11	RPE-BFP-Cas9 Kiz KO (pool)		Confluent, fixed in 4% PFA for 15 minutes at RT	Myosin Va, sc-365986, Santa Cruz, 1:1000	Rab34, 27435-1-AP, Proteintech, 1:1000	CEP170, Invitrogen, 41-3200, 1:1000	DAPI		2020-11-19	No.4
KAN588-12	RPE-BFP-Cas9 sgPDE6D#1, post-Cre, sorted		Confluent, fixed in 4% PFA for 15 minutes at RT	Myosin Va, sc-365986, Santa Cruz, 1:1000	Rab34, 27435-1-AP, Proteintech, 1:1000	CEP170, Invitrogen, 41-3200, 1:1000	DAPI		2020-11-19	No.4
KAN588-13	RPE-BFP-Cas9 sgLRRC45#1, post-Cre, sorted		Confluent, fixed in 4% PFA for 15 minutes at RT	Myosin Va, sc-365986, Santa Cruz, 1:1000	Rab34, 27435-1-AP, Proteintech, 1:1000	CEP170, Invitrogen, 41-3200, 1:1000	DAPI		2020-11-19	No.4
Exp.4
KAN592-1	RPE-BFP-Cas9 pMCB306 (pool)		Confluent, fixed in 4% PFA for 15 minutes at RT	Myosin Va, sc-365986, Santa Cruz, 1:1000	Rab34, 27435-1-AP, Proteintech, 1:1000	CEP170, Invitrogen, 41-3200, 1:1000	DAPI		2020-11-23	No.5
KAN592-2	RPE-BFP-Cas9 CEP164KO (pool)		Confluent, fixed in 4% PFA for 15 minutes at RT	Myosin Va, sc-365986, Santa Cruz, 1:1000	Rab34, 27435-1-AP, Proteintech, 1:1000	CEP170, Invitrogen, 41-3200, 1:1000	DAPI		2020-11-23	No.5
KAN592-3	RPE-BFP-Cas9 CEP83 KO (pool)		Confluent, fixed in 4% PFA for 15 minutes at RT	Myosin Va, sc-365986, Santa Cruz, 1:1000	Rab34, 27435-1-AP, Proteintech, 1:1000	CEP170, Invitrogen, 41-3200, 1:1000	DAPI		2020-11-23	No.5
KAN592-4	RPE-BFP-Cas9 SCLT1 KO (pool)		Confluent, fixed in 4% PFA for 15 minutes at RT	Myosin Va, sc-365986, Santa Cruz, 1:1000	Rab34, 27435-1-AP, Proteintech, 1:1000	CEP170, Invitrogen, 41-3200, 1:1000	DAPI		2020-11-23	No.5
KAN592-5	RPE-BFP-Cas9 FBF1 KO (pool)		Confluent, fixed in 4% PFA for 15 minutes at RT	Myosin Va, sc-365986, Santa Cruz, 1:1000	Rab34, 27435-1-AP, Proteintech, 1:1000	CEP170, Invitrogen, 41-3200, 1:1000	DAPI		2020-11-23	No.5
KAN592-6	RPE-BFP-Cas9 CEP89KO (pool)		Confluent, fixed in 4% PFA for 15 minutes at RT	Myosin Va, sc-365986, Santa Cruz, 1:1000	Rab34, 27435-1-AP, Proteintech, 1:1000	CEP170, Invitrogen, 41-3200, 1:1000	DAPI		2020-11-23	No.5
KAN592-7	RPE-BFP-Cas9 CCDC92 KO (pool)		Confluent, fixed in 4% PFA for 15 minutes at RT	Myosin Va, sc-365986, Santa Cruz, 1:1000	Rab34, 27435-1-AP, Proteintech, 1:1000	CEP170, Invitrogen, 41-3200, 1:1000	DAPI		2020-11-23	No.5
KAN592-8	RPE-BFP-Cas9 ANKRD26 KO (pool)		Confluent, fixed in 4% PFA for 15 minutes at RT	Myosin Va, sc-365986, Santa Cruz, 1:1000	Rab34, 27435-1-AP, Proteintech, 1:1000	CEP170, Invitrogen, 41-3200, 1:1000	DAPI		2020-11-23	No.5
KAN592-9	RPE-BFP-Cas9 TTBK2 KO (pool)		Confluent, fixed in 4% PFA for 15 minutes at RT	Myosin Va, sc-365986, Santa Cruz, 1:1000	Rab34, 27435-1-AP, Proteintech, 1:1000	CEP170, Invitrogen, 41-3200, 1:1000	DAPI		2020-11-23	No.5
KAN592-10	RPE-BFP-Cas9 INPP5E KO (pool)		Confluent, fixed in 4% PFA for 15 minutes at RT	Myosin Va, sc-365986, Santa Cruz, 1:1000	Rab34, 27435-1-AP, Proteintech, 1:1000	CEP170, Invitrogen, 41-3200, 1:1000	DAPI		2020-11-23	No.5
KAN592-11	RPE-BFP-Cas9 Kiz KO (pool)		Confluent, fixed in 4% PFA for 15 minutes at RT	Myosin Va, sc-365986, Santa Cruz, 1:1000	Rab34, 27435-1-AP, Proteintech, 1:1000	CEP170, Invitrogen, 41-3200, 1:1000	DAPI		2020-11-23	No.5
KAN592-12	RPE-BFP-Cas9 sgPDE6D#1, post-Cre, sorted		Confluent, fixed in 4% PFA for 15 minutes at RT	Myosin Va, sc-365986, Santa Cruz, 1:1000	Rab34, 27435-1-AP, Proteintech, 1:1000	CEP170, Invitrogen, 41-3200, 1:1000	DAPI		2020-11-23	No.5
KAN592-13	RPE-BFP-Cas9 sgLRRC45#1, post-Cre, sorted		Confluent, fixed in 4% PFA for 15 minutes at RT	Myosin Va, sc-365986, Santa Cruz, 1:1000	Rab34, 27435-1-AP, Proteintech, 1:1000	CEP170, Invitrogen, 41-3200, 1:1000	DAPI		2020-11-23	No.5
Exp.5
KAN611-1	RPE-BFP-Cas9 pMCB306 (pool)		Confluent, Fixed in 4% PFA at RT for 15 minutes.	Myosin Va, sc-365986, Santa Cruz, 1:1000	Rab34, 27435-1-AP, Proteintech, 1:1000	CEP170, Invitrogen, 41-3200, 1:1000	DAPI	No.6	2021-03-01
KAN611-2	RPE-BFP-Cas9 CEP164KO (pool)		Confluent, Fixed in 4% PFA at RT for 15 minutes.	Myosin Va, sc-365986, Santa Cruz, 1:1000	Rab34, 27435-1-AP, Proteintech, 1:1000	CEP170, Invitrogen, 41-3200, 1:1000	DAPI	No.6	2021-03-01
KAN611-3	RPE-BFP-Cas9 CEP83 KO (pool)		Confluent, Fixed in 4% PFA at RT for 15 minutes.	Myosin Va, sc-365986, Santa Cruz, 1:1000	Rab34, 27435-1-AP, Proteintech, 1:1000	CEP170, Invitrogen, 41-3200, 1:1000	DAPI	No.6	2021-03-01
KAN611-4	RPE-BFP-Cas9 SCLT1 KO (pool)		Confluent, Fixed in 4% PFA at RT for 15 minutes.	Myosin Va, sc-365986, Santa Cruz, 1:1000	Rab34, 27435-1-AP, Proteintech, 1:1000	CEP170, Invitrogen, 41-3200, 1:1000	DAPI	No.6	2021-03-01
KAN611-5	RPE-BFP-Cas9 FBF1 KO (pool)		Confluent, Fixed in 4% PFA at RT for 15 minutes.	Myosin Va, sc-365986, Santa Cruz, 1:1000	Rab34, 27435-1-AP, Proteintech, 1:1000	CEP170, Invitrogen, 41-3200, 1:1000	DAPI	No.6	2021-03-01
KAN611-6	RPE-BFP-Cas9 CEP89KO (pool)		Confluent, Fixed in 4% PFA at RT for 15 minutes.	Myosin Va, sc-365986, Santa Cruz, 1:1000	Rab34, 27435-1-AP, Proteintech, 1:1000	CEP170, Invitrogen, 41-3200, 1:1000	DAPI	No.6	2021-03-01
KAN611-7	RPE-BFP-Cas9 CCDC92 KO (pool)		Confluent, Fixed in 4% PFA at RT for 15 minutes.	Myosin Va, sc-365986, Santa Cruz, 1:1000	Rab34, 27435-1-AP, Proteintech, 1:1000	CEP170, Invitrogen, 41-3200, 1:1000	DAPI	No.6	2021-03-01
KAN611-8	RPE-BFP-Cas9 ANKRD26 KO (pool)		Confluent, Fixed in 4% PFA at RT for 15 minutes.	Myosin Va, sc-365986, Santa Cruz, 1:1000	Rab34, 27435-1-AP, Proteintech, 1:1000	CEP170, Invitrogen, 41-3200, 1:1000	DAPI	No.6	2021-03-01
KAN611-9	RPE-BFP-Cas9 TTBK2 KO (pool)		Confluent, Fixed in 4% PFA at RT for 15 minutes.	Myosin Va, sc-365986, Santa Cruz, 1:1000	Rab34, 27435-1-AP, Proteintech, 1:1000	CEP170, Invitrogen, 41-3200, 1:1000	DAPI	No.6	2021-03-01
KAN611-10	RPE-BFP-Cas9 INPP5E KO (pool)		Confluent, Fixed in 4% PFA at RT for 15 minutes.	Myosin Va, sc-365986, Santa Cruz, 1:1000	Rab34, 27435-1-AP, Proteintech, 1:1000	CEP170, Invitrogen, 41-3200, 1:1000	DAPI	No.6	2021-03-01
KAN611-11	RPE-BFP-Cas9 Kiz KO (pool)		Confluent, Fixed in 4% PFA at RT for 15 minutes.	Myosin Va, sc-365986, Santa Cruz, 1:1000	Rab34, 27435-1-AP, Proteintech, 1:1000	CEP170, Invitrogen, 41-3200, 1:1000	DAPI	No.6	2021-03-01
KAN611-12	RPE-BFP-Cas9 LRRC45 KO (pool)		Confluent, Fixed in 4% PFA at RT for 15 minutes.	Myosin Va, sc-365986, Santa Cruz, 1:1000	Rab34, 27435-1-AP, Proteintech, 1:1000	CEP170, Invitrogen, 41-3200, 1:1000	DAPI	No.6	2021-03-01
KAN611-13	RPE-BFP-Cas9 NCS1 KO (pool)		Confluent, Fixed in 4% PFA at RT for 15 minutes.	Myosin Va, sc-365986, Santa Cruz, 1:1000	Rab34, 27435-1-AP, Proteintech, 1:1000	CEP170, Invitrogen, 41-3200, 1:1000	DAPI	No.6	2021-03-01
KAN611-14	RPE-BFP-Cas9 C3orf14 KO (pool)		Confluent, Fixed in 4% PFA at RT for 15 minutes.	Myosin Va, sc-365986, Santa Cruz, 1:1000	Rab34, 27435-1-AP, Proteintech, 1:1000	CEP170, Invitrogen, 41-3200, 1:1000	DAPI	No.6	2021-03-01
KAN611-15	RPE-BFP-Cas9 FOP KO (pool)		Confluent, Fixed in 4% PFA at RT for 15 minutes.	Myosin Va, sc-365986, Santa Cruz, 1:1000	Rab34, 27435-1-AP, Proteintech, 1:1000	CEP170, Invitrogen, 41-3200, 1:1000	DAPI	No.6	2021-03-01
KAN611-16	RPE-BFP-Cas9 sgSafe (pool)		Confluent, Fixed in 4% PFA at RT for 15 minutes.	Myosin Va, sc-365986, Santa Cruz, 1:1000	Rab34, 27435-1-AP, Proteintech, 1:1000	CEP170, Invitrogen, 41-3200, 1:1000	DAPI	No.6	2021-03-01
Exp.6
KAN646-1	RPE-BFP-Cas9 pMCB306 (pool)		confluent, Fixed in 4% PFA at RT for 15 minutes.	Myosin Va, sc-365986, Santa Cruz, 1:1000	Rab34, 27435-1-AP, Proteintech, 1:1000	CEP170, Invitrogen, 41-3200, 1:1000	DAPI	2021-05-10	No.1
KAN646-2	RPE-BFP-Cas9 LRRC45 KO (pool)		confluent, Fixed in 4% PFA at RT for 15 minutes.	Myosin Va, sc-365986, Santa Cruz, 1:1000	Rab34, 27435-1-AP, Proteintech, 1:1000	CEP170, Invitrogen, 41-3200, 1:1000	DAPI	2021-05-10	No.1
KAN646-3	RPE-BFP-Cas9 FOP KO (pool)		confluent, Fixed in 4% PFA at RT for 15 minutes.	Myosin Va, sc-365986, Santa Cruz, 1:1000	Rab34, 27435-1-AP, Proteintech, 1:1000	CEP170, Invitrogen, 41-3200, 1:1000	DAPI	2021-05-10	No.1
KAN646-4	RPE-BFP-Cas9 sgIFT52#1		confluent, Fixed in 4% PFA at RT for 15 minutes.	Myosin Va, sc-365986, Santa Cruz, 1:1000	Rab34, 27435-1-AP, Proteintech, 1:1000	CEP170, Invitrogen, 41-3200, 1:1000	DAPI	2021-05-10	No.1
KAN646-5	RPE-BFP-Cas9 sgSafe (pool)		confluent, Fixed in 4% PFA at RT for 15 minutes.	Myosin Va, sc-365986, Santa Cruz, 1:1000	Rab34, 27435-1-AP, Proteintech, 1:1000	CEP170, Invitrogen, 41-3200, 1:1000	DAPI	2021-05-10	No.1
Exp.7
KAN646-6	RPE-BFP-Cas9 pMCB306 (pool)		confluent, Fixed in 4% PFA at RT for 15 minutes.	Myosin Va, sc-365986, Santa Cruz, 1:1000	Rab34, 27435-1-AP, Proteintech, 1:1000	CEP170, Invitrogen, 41-3200, 1:1000	DAPI	2021-05-10	No.2
KAN646-7	RPE-BFP-Cas9 LRRC45 KO (pool)		confluent, Fixed in 4% PFA at RT for 15 minutes.	Myosin Va, sc-365986, Santa Cruz, 1:1000	Rab34, 27435-1-AP, Proteintech, 1:1000	CEP170, Invitrogen, 41-3200, 1:1000	DAPI	2021-05-10	No.2
KAN646-8	RPE-BFP-Cas9 FOP KO (pool)		confluent, Fixed in 4% PFA at RT for 15 minutes.	Myosin Va, sc-365986, Santa Cruz, 1:1000	Rab34, 27435-1-AP, Proteintech, 1:1000	CEP170, Invitrogen, 41-3200, 1:1000	DAPI	2021-05-10	No.2
KAN646-9	RPE-BFP-Cas9 sgIFT52#1		confluent, Fixed in 4% PFA at RT for 15 minutes.	Myosin Va, sc-365986, Santa Cruz, 1:1000	Rab34, 27435-1-AP, Proteintech, 1:1000	CEP170, Invitrogen, 41-3200, 1:1000	DAPI	2021-05-10	No.2
KAN646-10	RPE-BFP-Cas9 sgSafe (pool)		confluent, Fixed in 4% PFA at RT for 15 minutes.	Myosin Va, sc-365986, Santa Cruz, 1:1000	Rab34, 27435-1-AP, Proteintech, 1:1000	CEP170, Invitrogen, 41-3200, 1:1000	DAPI	2021-05-10	No.2
Exp.8
KAN668-1	RPE-BFP-Cas9 pMCB306 (pool)		confluent, Fixed in 4% PFA at RT for 15 minutes.	Myosin Va, sc-365986, Santa Cruz, 1:1000	Rab34, 27435-1-AP, Proteintech, 1:1000	CEP170, Invitrogen, 41-3200, 1:1000	DAPI	2021-05-18	No.4
KAN668-2	RPE-BFP-Cas9 LRRC45 KO (pool)		confluent, Fixed in 4% PFA at RT for 15 minutes.	Myosin Va, sc-365986, Santa Cruz, 1:1000	Rab34, 27435-1-AP, Proteintech, 1:1000	CEP170, Invitrogen, 41-3200, 1:1000	DAPI	2021-05-18	No.4
KAN668-3	RPE-BFP-Cas9 FOP KO (pool)		confluent, Fixed in 4% PFA at RT for 15 minutes.	Myosin Va, sc-365986, Santa Cruz, 1:1000	Rab34, 27435-1-AP, Proteintech, 1:1000	CEP170, Invitrogen, 41-3200, 1:1000	DAPI	2021-05-18	No.4
KAN668-4	RPE-BFP-Cas9 sgIFT52#1		confluent, Fixed in 4% PFA at RT for 15 minutes.	Myosin Va, sc-365986, Santa Cruz, 1:1000	Rab34, 27435-1-AP, Proteintech, 1:1000	CEP170, Invitrogen, 41-3200, 1:1000	DAPI	2021-05-18	No.4
KAN668-5	RPE-BFP-Cas9 sgSafe (pool)		confluent, Fixed in 4% PFA at RT for 15 minutes.	Myosin Va, sc-365986, Santa Cruz, 1:1000	Rab34, 27435-1-AP, Proteintech, 1:1000	CEP170, Invitrogen, 41-3200, 1:1000	DAPI	2021-05-18	No.4
Exp.9
KAN668-6	RPE-BFP-Cas9 pMCB306 (pool)		confluent, Fixed in 4% PFA at RT for 15 minutes.	Myosin Va, sc-365986, Santa Cruz, 1:1000	Rab34, 27435-1-AP, Proteintech, 1:1000	CEP170, Invitrogen, 41-3200, 1:1000	DAPI	2021-05-18	No.5
KAN668-7	RPE-BFP-Cas9 LRRC45 KO (pool)		confluent, Fixed in 4% PFA at RT for 15 minutes.	Myosin Va, sc-365986, Santa Cruz, 1:1000	Rab34, 27435-1-AP, Proteintech, 1:1000	CEP170, Invitrogen, 41-3200, 1:1000	DAPI	2021-05-18	No.5
KAN668-8	RPE-BFP-Cas9 FOP KO (pool)		confluent, Fixed in 4% PFA at RT for 15 minutes.	Myosin Va, sc-365986, Santa Cruz, 1:1000	Rab34, 27435-1-AP, Proteintech, 1:1000	CEP170, Invitrogen, 41-3200, 1:1000	DAPI	2021-05-18	No.5
KAN668-9	RPE-BFP-Cas9 sgSafe (pool)		confluent, Fixed in 4% PFA at RT for 15 minutes.	Myosin Va, sc-365986, Santa Cruz, 1:1000	Rab34, 27435-1-AP, Proteintech, 1:1000	CEP170, Invitrogen, 41-3200, 1:1000	DAPI	2021-05-18	No.5
Exp.10
KAN695-1	RPE-BFP-Cas9 sgSafe (pool)		confluent, Fixed in 4% PFA at RT for 15 minutes.	Myosin Va, sc-365986, Santa Cruz, 1:1000	Rab34, 27435-1-AP, Proteintech, 1:1000	CEP170, Invitrogen, 41-3200, 1:1000	DAPI	2021-09-17
KAN695-2	RPE-BFP-Cas9 CEP164KO (pool)		confluent, Fixed in 4% PFA at RT for 15 minutes.	Myosin Va, sc-365986, Santa Cruz, 1:1000	Rab34, 27435-1-AP, Proteintech, 1:1000	CEP170, Invitrogen, 41-3200, 1:1000	DAPI	2021-09-17
KAN695-3	RPE-BFP-Cas9 CEP83 KO (pool)		confluent, Fixed in 4% PFA at RT for 15 minutes.	Myosin Va, sc-365986, Santa Cruz, 1:1000	Rab34, 27435-1-AP, Proteintech, 1:1000	CEP170, Invitrogen, 41-3200, 1:1000	DAPI	2021-09-17
KAN695-4	RPE-BFP-Cas9 SCLT1 KO (pool)		confluent, Fixed in 4% PFA at RT for 15 minutes.	Myosin Va, sc-365986, Santa Cruz, 1:1000	Rab34, 27435-1-AP, Proteintech, 1:1000	CEP170, Invitrogen, 41-3200, 1:1000	DAPI	2021-09-17
KAN695-5	RPE-BFP-Cas9 FBF1 KO (pool)		confluent, Fixed in 4% PFA at RT for 15 minutes.	Myosin Va, sc-365986, Santa Cruz, 1:1000	Rab34, 27435-1-AP, Proteintech, 1:1000	CEP170, Invitrogen, 41-3200, 1:1000	DAPI	2021-09-17
KAN695-6	RPE-BFP-Cas9 CEP89KO (pool)		confluent, Fixed in 4% PFA at RT for 15 minutes.	Myosin Va, sc-365986, Santa Cruz, 1:1000	Rab34, 27435-1-AP, Proteintech, 1:1000	CEP170, Invitrogen, 41-3200, 1:1000	DAPI	2021-09-17
KAN695-7	RPE-BFP-Cas9 CCDC92 KO (pool)		confluent, Fixed in 4% PFA at RT for 15 minutes.	Myosin Va, sc-365986, Santa Cruz, 1:1000	Rab34, 27435-1-AP, Proteintech, 1:1000	CEP170, Invitrogen, 41-3200, 1:1000	DAPI	2021-09-17
KAN695-8	RPE-BFP-Cas9 ANKRD26 KO (pool)		confluent, Fixed in 4% PFA at RT for 15 minutes.	Myosin Va, sc-365986, Santa Cruz, 1:1000	Rab34, 27435-1-AP, Proteintech, 1:1000	CEP170, Invitrogen, 41-3200, 1:1000	DAPI	2021-09-17
KAN695-9	RPE-BFP-Cas9 TTBK2 KO (pool)		confluent, Fixed in 4% PFA at RT for 15 minutes.	Myosin Va, sc-365986, Santa Cruz, 1:1000	Rab34, 27435-1-AP, Proteintech, 1:1000	CEP170, Invitrogen, 41-3200, 1:1000	DAPI	2021-09-17
KAN695-10	RPE-BFP-Cas9 INPP5E KO (pool)		confluent, Fixed in 4% PFA at RT for 15 minutes.	Myosin Va, sc-365986, Santa Cruz, 1:1000	Rab34, 27435-1-AP, Proteintech, 1:1000	CEP170, Invitrogen, 41-3200, 1:1000	DAPI	2021-09-17
KAN695-11	RPE-BFP-Cas9 Kiz KO (pool)		confluent, Fixed in 4% PFA at RT for 15 minutes.	Myosin Va, sc-365986, Santa Cruz, 1:1000	Rab34, 27435-1-AP, Proteintech, 1:1000	CEP170, Invitrogen, 41-3200, 1:1000	DAPI	2021-09-17
KAN695-12	RPE-BFP-Cas9 LRRC45 KO (pool)		confluent, Fixed in 4% PFA at RT for 15 minutes.	Myosin Va, sc-365986, Santa Cruz, 1:1000	Rab34, 27435-1-AP, Proteintech, 1:1000	CEP170, Invitrogen, 41-3200, 1:1000	DAPI	2021-09-17
Exp.11
KAN701-1	RPE-BFP-Cas9 sgSafe (pool)		confluent, Fixed in 4% PFA at RT for 15 minutes.	Myosin Va, sc-365986, Santa Cruz, 1:1000	Rab34, 27435-1-AP, Proteintech, 1:1000	CEP170, Invitrogen, 41-3200, 1:1000	DAPI	2021-10-04
KAN701-2	RPE-BFP-Cas9 CEP164KO (pool)		confluent, Fixed in 4% PFA at RT for 15 minutes.	Myosin Va, sc-365986, Santa Cruz, 1:1000	Rab34, 27435-1-AP, Proteintech, 1:1000	CEP170, Invitrogen, 41-3200, 1:1000	DAPI	2021-10-04
KAN701-3	RPE-BFP-Cas9 CEP83 KO (pool)		confluent, Fixed in 4% PFA at RT for 15 minutes.	Myosin Va, sc-365986, Santa Cruz, 1:1000	Rab34, 27435-1-AP, Proteintech, 1:1000	CEP170, Invitrogen, 41-3200, 1:1000	DAPI	2021-10-04
KAN701-4	RPE-BFP-Cas9 SCLT1 KO (pool)		confluent, Fixed in 4% PFA at RT for 15 minutes.	Myosin Va, sc-365986, Santa Cruz, 1:1000	Rab34, 27435-1-AP, Proteintech, 1:1000	CEP170, Invitrogen, 41-3200, 1:1000	DAPI	2021-10-04
KAN701-5	RPE-BFP-Cas9 FBF1 KO (pool)		confluent, Fixed in 4% PFA at RT for 15 minutes.	Myosin Va, sc-365986, Santa Cruz, 1:1000	Rab34, 27435-1-AP, Proteintech, 1:1000	CEP170, Invitrogen, 41-3200, 1:1000	DAPI	2021-10-04
KAN701-6	RPE-BFP-Cas9 CEP89KO (pool)		confluent, Fixed in 4% PFA at RT for 15 minutes.	Myosin Va, sc-365986, Santa Cruz, 1:1000	Rab34, 27435-1-AP, Proteintech, 1:1000	CEP170, Invitrogen, 41-3200, 1:1000	DAPI	2021-10-04
KAN701-7	RPE-BFP-Cas9 CCDC92 KO (pool)		confluent, Fixed in 4% PFA at RT for 15 minutes.	Myosin Va, sc-365986, Santa Cruz, 1:1000	Rab34, 27435-1-AP, Proteintech, 1:1000	CEP170, Invitrogen, 41-3200, 1:1000	DAPI	2021-10-04
KAN701-8	RPE-BFP-Cas9 ANKRD26 KO (pool)		confluent, Fixed in 4% PFA at RT for 15 minutes.	Myosin Va, sc-365986, Santa Cruz, 1:1000	Rab34, 27435-1-AP, Proteintech, 1:1000	CEP170, Invitrogen, 41-3200, 1:1000	DAPI	2021-10-04
KAN701-9	RPE-BFP-Cas9 TTBK2 KO (pool)		confluent, Fixed in 4% PFA at RT for 15 minutes.	Myosin Va, sc-365986, Santa Cruz, 1:1000	Rab34, 27435-1-AP, Proteintech, 1:1000	CEP170, Invitrogen, 41-3200, 1:1000	DAPI	2021-10-04
KAN701-10	RPE-BFP-Cas9 INPP5E KO (pool)		confluent, Fixed in 4% PFA at RT for 15 minutes.	Myosin Va, sc-365986, Santa Cruz, 1:1000	Rab34, 27435-1-AP, Proteintech, 1:1000	CEP170, Invitrogen, 41-3200, 1:1000	DAPI	2021-10-04
KAN701-11	RPE-BFP-Cas9 Kiz KO (pool)		confluent, Fixed in 4% PFA at RT for 15 minutes.	Myosin Va, sc-365986, Santa Cruz, 1:1000	Rab34, 27435-1-AP, Proteintech, 1:1000	CEP170, Invitrogen, 41-3200, 1:1000	DAPI	2021-10-04
KAN701-12	RPE-BFP-Cas9 LRRC45 KO (pool)		confluent, Fixed in 4% PFA at RT for 15 minutes.	Myosin Va, sc-365986, Santa Cruz, 1:1000	Rab34, 27435-1-AP, Proteintech, 1:1000	CEP170, Invitrogen, 41-3200, 1:1000	DAPI	2021-10-04

## Sheet: Statistics
	Table Analyzed	Data 1		Table Analyzed	Data 1		Table Analyzed	Data 1		Table Analyzed	Data 1		Table Analyzed	Data 1		Table Analyzed	Data 1		Table Analyzed	Data 1		Table Analyzed	Data 1		Table Analyzed	Data 1		Table Analyzed	Data 1
	Column C	CEP164 KO		Column D	CEP83 KO		Column E	SCLT1 KO		Column F	FBF1 KO		Column G	CEP89 KO		Column I	ANKRD26 KO		Column J	TTBK2 KO		Column K	INPP5E KO		Column L	KIZ KO		Column M	LRRC45 KO
	vs.	vs.		vs.	vs.		vs.	vs.		vs.	vs.		vs.	vs.		vs.	vs.		vs.	vs.		vs.	vs.		vs.	vs.		vs.	vs.
	Column B	sgSafe		Column B	sgSafe		Column B	sgSafe		Column B	sgSafe		Column B	sgSafe		Column B	sgSafe		Column B	sgSafe		Column B	sgSafe		Column B	sgSafe		Column B	sgSafe
	Unpaired t test with Welch's correction			Unpaired t test with Welch's correction			Unpaired t test with Welch's correction			Unpaired t test with Welch's correction			Unpaired t test with Welch's correction			Unpaired t test with Welch's correction			Unpaired t test with Welch's correction			Unpaired t test with Welch's correction			Unpaired t test with Welch's correction			Unpaired t test with Welch's correction
	P value	<0.0001		P value	<0.0001		P value	<0.0001		P value	0.5794		P value	0.0006		P value	0.8041		P value	<0.0001		P value	0.2462		P value	0.6394		P value	0.1326
	P value summary	****		P value summary	****		P value summary	****		P value summary	ns		P value summary	***		P value summary	ns		P value summary	****		P value summary	ns		P value summary	ns		P value summary	ns
	Significantly different (P < 0.05)?	Yes		Significantly different (P < 0.05)?	Yes		Significantly different (P < 0.05)?	Yes		Significantly different (P < 0.05)?	No		Significantly different (P < 0.05)?	Yes		Significantly different (P < 0.05)?	No		Significantly different (P < 0.05)?	Yes		Significantly different (P < 0.05)?	No		Significantly different (P < 0.05)?	No		Significantly different (P < 0.05)?	No
	One- or two-tailed P value?	Two-tailed		One- or two-tailed P value?	Two-tailed		One- or two-tailed P value?	Two-tailed		One- or two-tailed P value?	Two-tailed		One- or two-tailed P value?	Two-tailed		One- or two-tailed P value?	Two-tailed		One- or two-tailed P value?	Two-tailed		One- or two-tailed P value?	Two-tailed		One- or two-tailed P value?	Two-tailed		One- or two-tailed P value?	Two-tailed
	Welch-corrected t, df	t=21.35, df=7.714		Welch-corrected t, df	t=21.09, df=8.016		Welch-corrected t, df	t=15.01, df=13.74		Welch-corrected t, df	t=0.5732, df=9.858		Welch-corrected t, df	t=4.722, df=11.13		Welch-corrected t, df	t=0.2538, df=11.55		Welch-corrected t, df	t=22.06, df=7.104		Welch-corrected t, df	t=1.232, df=10.02		Welch-corrected t, df	t=0.4797, df=13.03		Welch-corrected t, df	t=1.625, df=10.94
	How big is the difference?			How big is the difference?			How big is the difference?			How big is the difference?			How big is the difference?			How big is the difference?			How big is the difference?			How big is the difference?			How big is the difference?			How big is the difference?
	Mean of column B	19.15		Mean of column B	19.15		Mean of column B	19.15		Mean of column B	19.15		Mean of column B	19.15		Mean of column B	19.15		Mean of column B	19.15		Mean of column B	19.15		Mean of column B	19.15		Mean of column B	19.15
	Mean of column C	0.2942		Mean of column D	0.3283		Mean of column E	2.009		Mean of column F	20.33		Mean of column G	10.95		Mean of column I	18.73		Mean of column J	0.0744		Mean of column K	21.62		Mean of column L	19.94		Mean of column M	22.04
	Difference between means (C - B) ± SEM	-18.86 ± 0.8833		Difference between means (D - B) ± SEM	-18.82 ± 0.8924		Difference between means (E - B) ± SEM	-17.14 ± 1.142		Difference between means (F - B) ± SEM	1.178 ± 2.054		Difference between means (G - B) ± SEM	-8.200 ± 1.736		Difference between means (I - B) ± SEM	-0.4210 ± 1.659		Difference between means (J - B) ± SEM	-19.08 ± 0.8648		Difference between means (K - B) ± SEM	2.468 ± 2.004		Difference between means (L - B) ± SEM	0.7911 ± 1.649		Difference between means (M - B) ± SEM	2.884 ± 1.775
	95% confidence interval	-20.91 to -16.81		95% confidence interval	-20.88 to -16.77		95% confidence interval	-19.60 to -14.69		95% confidence interval	-3.409 to 5.764		95% confidence interval	-12.02 to -4.383		95% confidence interval	-4.051 to 3.209		95% confidence interval	-21.12 to -17.04		95% confidence interval	-1.995 to 6.932		95% confidence interval	-2.771 to 4.353		95% confidence interval	-1.025 to 6.793
	R squared (eta squared)	0.9834		R squared (eta squared)	0.9823		R squared (eta squared)	0.9426		R squared (eta squared)	0.03225		R squared (eta squared)	0.667		R squared (eta squared)	0.005546		R squared (eta squared)	0.9856		R squared (eta squared)	0.1315		R squared (eta squared)	0.01735		R squared (eta squared)	0.1944
	F test to compare variances			F test to compare variances			F test to compare variances			F test to compare variances			F test to compare variances			F test to compare variances			F test to compare variances			F test to compare variances			F test to compare variances			F test to compare variances
	F, DFn, Dfd	19.55, 7, 7		F, DFn, Dfd	13.71, 7, 7		F, DFn, Dfd	1.322, 7, 7		F, DFn, Dfd	4.686, 7, 7		F, DFn, Dfd	3.062, 7, 7		F, DFn, Dfd	2.707, 7, 7		F, DFn, Dfd	134.1, 7, 7		F, DFn, Dfd	4.409, 7, 7		F, DFn, Dfd	2.996, 8, 7		F, DFn, Dfd	3.243, 7, 7
	P value	0.0009		P value	0.0027		P value	0.7221		P value	0.059		P value	0.163		P value	0.2123		P value	<0.0001		P value	0.0688		P value	0.166		P value	0.1434
	P value summary	***		P value summary	**		P value summary	ns		P value summary	ns		P value summary	ns		P value summary	ns		P value summary	****		P value summary	ns		P value summary	ns		P value summary	ns
	Significantly different (P < 0.05)?	Yes		Significantly different (P < 0.05)?	Yes		Significantly different (P < 0.05)?	No		Significantly different (P < 0.05)?	No		Significantly different (P < 0.05)?	No		Significantly different (P < 0.05)?	No		Significantly different (P < 0.05)?	Yes		Significantly different (P < 0.05)?	No		Significantly different (P < 0.05)?	No		Significantly different (P < 0.05)?	No
	Data analyzed			Data analyzed			Data analyzed			Data analyzed			Data analyzed			Data analyzed			Data analyzed			Data analyzed			Data analyzed			Data analyzed
	Sample size, column B	8		Sample size, column B	8		Sample size, column B	8		Sample size, column B	8		Sample size, column B	8		Sample size, column B	8		Sample size, column B	8		Sample size, column B	8		Sample size, column B	8		Sample size, column B	8
	Sample size, column C	8		Sample size, column D	8		Sample size, column E	8		Sample size, column F	8		Sample size, column G	8		Sample size, column I	8		Sample size, column J	8		Sample size, column K	8		Sample size, column L	9		Sample size, column M	8
	Number of families	1
	Number of comparisons per family	12
	Alpha	0.05
	Dunnett's multiple comparisons test	Mean Diff.	95.00% CI of diff.	Below threshold?	Summary	Adjusted P Value	B-?
	sgSafe vs. pMCB306	-10.02	-15.49 to -4.547	Yes	****	<0.0001	A	pMCB306
	sgSafe vs. CEP164 KO	18.86	12.97 to 24.75	Yes	****	<0.0001	C	CEP164 KO
	sgSafe vs. CEP83 KO	18.82	12.93 to 24.71	Yes	****	<0.0001	D	CEP83 KO
	sgSafe vs. SCLT1 KO	17.14	11.25 to 23.03	Yes	****	<0.0001	E	SCLT1 KO
	sgSafe vs. FBF1 KO	-1.178	-7.067 to 4.712	No	ns	0.9991	F	FBF1 KO
	sgSafe vs. CEP89 KO	8.2	2.310 to 14.09	Yes	**	0.0017	G	CEP89 KO
	sgSafe vs. CCDC92 KO	-5.452	-11.34 to 0.4373	No	ns	0.0842	H	CCDC92 KO
	sgSafe vs. ANKRD26 KO	0.421	-5.468 to 6.310	No	ns	0.9997	I	ANKRD26 KO
	sgSafe vs. TTBK2 KO	19.08	13.19 to 24.97	Yes	****	<0.0001	J	TTBK2 KO
	sgSafe vs. INPP5E KO	-2.468	-8.358 to 3.421	No	ns	0.8646	K	INPP5E KO
	sgSafe vs. KIZ KO	-0.7911	-6.515 to 4.932	No	ns	0.9994	L	KIZ KO
	sgSafe vs. LRRC45 KO	-2.884	-8.773 to 3.005	No	ns	0.7329	M	LRRC45 KO
	Test details	Mean 1	Mean 2	Mean Diff.	SE of diff.	n1	n2	q	DF
	sgSafe vs. pMCB306	19.15	29.17	-10.02	1.942	8	11	5.16	95
	sgSafe vs. CEP164 KO	19.15	0.2942	18.86	2.089	8	8	9.025	95
	sgSafe vs. CEP83 KO	19.15	0.3283	18.82	2.089	8	8	9.009	95
	sgSafe vs. SCLT1 KO	19.15	2.009	17.14	2.089	8	8	8.205	95
	sgSafe vs. FBF1 KO	19.15	20.33	-1.178	2.089	8	8	0.5636	95
	sgSafe vs. CEP89 KO	19.15	10.95	8.2	2.089	8	8	3.924	95
	sgSafe vs. CCDC92 KO	19.15	24.6	-5.452	2.089	8	8	2.609	95
	sgSafe vs. ANKRD26 KO	19.15	18.73	0.421	2.089	8	8	0.2015	95
	sgSafe vs. TTBK2 KO	19.15	0.0744	19.08	2.089	8	8	9.131	95
	sgSafe vs. INPP5E KO	19.15	21.62	-2.468	2.089	8	8	1.181	95
	sgSafe vs. KIZ KO	19.15	19.94	-0.7911	2.031	8	9	0.3896	95
	sgSafe vs. LRRC45 KO	19.15	22.04	-2.884	2.089	8	8	1.38	95
