# Supplementary material for: A hierarchical pathway for assembly of the distal appendages that organize primary cilia
Source: eLife. 2025 Jan 30;14:e85999. doi: 10.7554/eLife.85999 (PMC11984956; doi:10.7554/eLife.85999)
Supplement: Figure 5—source data 4. [file elife-85999-fig5-data4.xlsx]

## Sheet: Raw data
sgGFP (pMCB306)				CEP164 KO				CEP83 KO				SCLT1 KO				FBF1 KO				CEP89 KO				CCDC92 KO				ANKRD26 KO				TTBK2 KO				INPP5E KO				KIZ KO				LRRC45 KO
Replicate 1
	CP110 2 dots	CP110 1 dot	cell number		CP110 2 dots	CP110 1 dot	cell number		CP110 2 dots	CP110 1 dot	cell number		CP110 2 dots	CP110 1 dot	cell number		CP110 2 dots	CP110 1 dot	cell number		CP110 2 dots	CP110 1 dot	cell number		CP110 2 dots	CP110 1 dot	cell number		CP110 2 dots	CP110 1 dot	cell number		CP110 2 dots	CP110 1 dot	cell number		CP110 2 dots	CP110 1 dot	cell number		CP110 2 dots	CP110 1 dot	cell number		CP110 2 dots	CP110 1 dot	cell number
KAN570-1		9	9	KAN570-2	6	1	7	KAN570-3	8	1	9	KAN570-4	9	2	11	KAN570-5	0	8	8	KAN570-6	1	3	4	KAN570-7		12	12	KAN570-8	1	6	7	KAN570-9	9	1	10	KAN570-10	1	9	10	KAN570-11		8	8	KAN570-13		9	9
2		8	8	2	6		6	2	8		8	2	5	1	6	2	2	7	9	2	5	4	9	2	1	8	9	2		11	11	2	12	0	12	2	1	7	8	2		8	8	2	3	6	9
3		11	11	3	8	1	9	3	10		10	3	9		9	3	2	6	8	3	0	6	6	3	1	8	9	3		12	12	3	9	0	9	3		12	12	3	1	11	12	3	1	13	14
4		11	11	4	10	1	11	4	8		8	4	10		10	4	1	10	11	4	1	4	5	4		11	11	4	3	7	10	4	13	0	13	4	1	8	9	4		7	7	4	1	6	7
5	1	6	7	5	9		9	5	15	1	16	5	12		12	5	2	7	9	5	0	10	10	5	1	9	10	5	2	4	6	5	8	0	8	5	1	7	8	5	1	9	10	5	1	7	8
6	1	9	10	6	7		7	6	6	1	7	6	9	1	10	6	0	8	8	6	5	9	14	6	2	10	12	6		8	8	6	12	0	12	6		9	9	6	1	9	10	6		11	11
7				7				7				7				7				7				7	2	9	11	7				7				7				7				7
8				8				8				8				8				8				8				8				8				8				8				8
9				9				9				9				9				9				9				9				9				9				9				9
10				10				10				10				10				10				10				10				10				10				10				10
	2	54	56		46	3	49		55	3	58		54	4	58		7	46	53		12	36	48		7	67	74		6	48	54		63	1	64		4	52	56		3	52	55		6	52	58
	3.57143	96.4286			93.8776	6.12245			94.8276	5.17241			93.1034	6.89655			13.2075	86.7925			25	75			9.45946	90.5405			11.1111	88.8889			98.4375	1.5625			7.14286	92.8571			5.45455	94.5455			10.3448	89.6552
																									CP110 2 dots	CP110 1 dot	#VALUE!		CP110 2 dots	CP110 1 dot	cell number		CP110 2 dots	CP110 1 dot	cell number		CP110 2 dots	CP110 1 dot	cell number		CP110 2 dots	CP110 1 dot	cell number		CP110 2 dots	CP110 1 dot	cell number
KAN571-1		12	12	KAN571-2	11		11	KAN571-3	13		13	KAN571-4			0	KAN571-5			0	KAN571-6			0	KAN571-7			0	KAN571-8			0	KAN571-9			0	KAN571-10			0	KAN571-11			0	KAN571-13			0
2	1	11	12	2	9		9	2	10		10	2			0	2			0	2			0	2			0	2			0	2			0	2			0	2			0	2			0
3	2	6	8	3	10		10	3	11	2	13	3			0	3			0	3			0	3			0	3			0	3			0	3			0	3			0	3			0
4		9	9	4	12	1	13	4	10		10	4			0	4			0	4			0	4			0	4			0	4			0	4			0	4			0	4			0
5		11	11	5	7		7	5	12		12	5			0	5			0	5			0	5			0	5			0	5			0	5			0	5			0	5			0
6		8	8	6	5	2	7	6	8	1	9	6			0	6			0	6			0	6				6			0	6			0	6			0	6			0	6			0
7				7				7				7				7				7				7				7				7				7				7				7
8				8				8				8				8				8				8				8				8				8				8				8
9				9				9				9				9				9				9				9				9				9				9				9
10				10				10				10				10				10				10				10				10				10				10				10
	3	57	60		54	3	57		64	3	67														0	0	0		0	0	0		0	0	0		0	0	0		0	0	0		0	0	0
	5	95			94.7368	5.26316			95.5224	4.47761															#DIV/0!	#DIV/0!			#DIV/0!	#DIV/0!			#DIV/0!	#DIV/0!			#DIV/0!	#DIV/0!			#DIV/0!	#DIV/0!			#DIV/0!	#DIV/0!
	CP110 2 dots	CP110 1 dot	cell number		CP110 2 dots	CP110 1 dot	cell number		CP110 2 dots	CP110 1 dot	cell number		CP110 2 dots	CP110 1 dot	cell number		CP110 2 dots	CP110 1 dot	cell number		CP110 2 dots	CP110 1 dot	cell number		CP110 2 dots	CP110 1 dot	#VALUE!		CP110 2 dots	CP110 1 dot	cell number		CP110 2 dots	CP110 1 dot	cell number		CP110 2 dots	CP110 1 dot	cell number		CP110 2 dots	CP110 1 dot	cell number		CP110 2 dots	CP110 1 dot	cell number
KAN572-1		8	8	KAN572-2	5		5	KAN572-3	12		12	KAN572-4	8		8	KAN572-5	1	2	3	KAN572-6		9	9	KAN572-7		11	11	KAN572-8		12	12	KAN572-9	12		12	KAN572-10	1	10	11	KAN572-11	1	7	8	KAN572-13	2	11	13
2		6	6	2	6		6	2	6	1	7	2	10		10	2		6	6	2	2	7	9	2	1	9	10	2		10	10	2	9		9	2		12	12	2	2	5	7	2		8	8
3	1	8	9	3	6		6	3	13		13	3	6	1	7	3		9	9	3	6	3	9	3		11	11	3	1	9	10	3	12		12	3	1	11	12	3		11	11	3	1	11	12
4		7	7	4	9		9	4	11		11	4	7		7	4	4	10	14	4	1	8	9	4		8	8	4	1	9	10	4	13		13	4		13	13	4	1	11	12	4	2	8	10
5		5	5	5	6		6	5	3	2	5	5	5		5	5	2	10	12	5	1	7	8	5		10	10	5	1	9	10	5	10		10	5		11	11	5	1	12	13	5		11	11
6	2	6	8	6	6		6	6	13		13	6	8		8	6		11	11	6	3	7	10	6	1	8	9	6	1	12	13	6	10		10	6	2	11	13	6	1	6	7	6	2	11	13
7	1	9	10	7				7				7				7				7				7				7				7				7				7				7
8				8				8				8				8				8				8				8				8				8				8				8
9				9				9				9				9				9				9				9				9				9				9				9
10				10				10				10				10				10				10				10				10				10				10				10
	4	49	53		38	0	38		58	3	61		44	1	45		7	48	55		13	41	54		2	57	59		4	61	65		66	0	66		4	68	72		6	52	58		7	60	67
	7.54717	92.4528			100	0			95.082	4.91803			97.7778	2.22222			12.7273	87.2727			24.0741	75.9259			3.38983	96.6102			6.15385	93.8462			100	0			5.55556	94.4444			10.3448	89.6552			10.4478	89.5522
	pMCB306	CEP164 KO	CEP83 KO	SCLT1 KO	FBF1 KO	CEP89 KO	CCDC92 KO	ANKRD26 KO	TTBK2 KO	INPP5E KO	KIZ KO	sgLRRC45
KAN570	3.57143	93.8776	94.8276	93.1034	13.2075	25	9.45946	11.1111	98.4375	7.14286	5.45455	10.3448
KAN571	5	94.7368	95.5224	96	14.2857	20.6349	8.19672	4.83871	96.9231	12.987	11.1111	9.72222
KAN572	7.54717	100	95.082	97.7778	12.7273	24.0741	3.38983	6.15385	100	5.55556	10.3448	10.4478

## Sheet: IF condition
Exp. number	Cell line	Culture condition	Fixation condition	rabbit-Alexa488	mouse IgG2a-Alexa568	mouse IgG2b-Alexa647	Nuclear stain	Date	Replicate
Exp.1
KAN570-1	RPE-BFP-Cas9 pMCB306 (pool)	Serum starved for 24 hours.	Fixed in 100% methanol at -20C for 5 minutes.	CP110, Proteintech, 12780-1-AP, 1:1000	CEP164, sc-515403, Santa Cruz, 1:250	FGFR1OP,H00011116-M01, 1:1000	DAPI	2020-10-27	No.1
KAN570-2	RPE-BFP-Cas9 CEP164KO (pool)	Serum starved for 24 hours.	Fixed in 100% methanol at -20C for 5 minutes.	CP110, Proteintech, 12780-1-AP, 1:1000	CEP164, sc-515403, Santa Cruz, 1:250	FGFR1OP,H00011116-M01, 1:1000	DAPI	2020-10-27	No.1
KAN570-3	RPE-BFP-Cas9 CEP83 KO (pool)	Serum starved for 24 hours.	Fixed in 100% methanol at -20C for 5 minutes.	CP110, Proteintech, 12780-1-AP, 1:1000	CEP164, sc-515403, Santa Cruz, 1:250	FGFR1OP,H00011116-M01, 1:1000	DAPI	2020-10-27	No.1
KAN570-4	RPE-BFP-Cas9 SCLT1 KO (pool)	Serum starved for 24 hours.	Fixed in 100% methanol at -20C for 5 minutes.	CP110, Proteintech, 12780-1-AP, 1:1000	CEP164, sc-515403, Santa Cruz, 1:250	FGFR1OP,H00011116-M01, 1:1000	DAPI	2020-10-27	No.1
KAN570-5	RPE-BFP-Cas9 FBF1 KO (pool)	Serum starved for 24 hours.	Fixed in 100% methanol at -20C for 5 minutes.	CP110, Proteintech, 12780-1-AP, 1:1000	CEP164, sc-515403, Santa Cruz, 1:250	FGFR1OP,H00011116-M01, 1:1000	DAPI	2020-10-27	No.1
KAN570-6	RPE-BFP-Cas9 CEP89KO (pool)	Serum starved for 24 hours.	Fixed in 100% methanol at -20C for 5 minutes.	CP110, Proteintech, 12780-1-AP, 1:1000	CEP164, sc-515403, Santa Cruz, 1:250	FGFR1OP,H00011116-M01, 1:1000	DAPI	2020-10-27	No.1
KAN570-7	RPE-BFP-Cas9 CCDC92 KO (pool)	Serum starved for 24 hours.	Fixed in 100% methanol at -20C for 5 minutes.	CP110, Proteintech, 12780-1-AP, 1:1000	CEP164, sc-515403, Santa Cruz, 1:250	FGFR1OP,H00011116-M01, 1:1000	DAPI	2020-10-27	No.1
KAN570-8	RPE-BFP-Cas9 ANKRD26 KO (pool)	Serum starved for 24 hours.	Fixed in 100% methanol at -20C for 5 minutes.	CP110, Proteintech, 12780-1-AP, 1:1000	CEP164, sc-515403, Santa Cruz, 1:250	FGFR1OP,H00011116-M01, 1:1000	DAPI	2020-10-27	No.1
KAN570-9	RPE-BFP-Cas9 TTBK2 KO (pool)	Serum starved for 24 hours.	Fixed in 100% methanol at -20C for 5 minutes.	CP110, Proteintech, 12780-1-AP, 1:1000	CEP164, sc-515403, Santa Cruz, 1:250	FGFR1OP,H00011116-M01, 1:1000	DAPI	2020-10-27	No.1
KAN570-10	RPE-BFP-Cas9 INPP5E KO (pool)	Serum starved for 24 hours.	Fixed in 100% methanol at -20C for 5 minutes.	CP110, Proteintech, 12780-1-AP, 1:1000	CEP164, sc-515403, Santa Cruz, 1:250	FGFR1OP,H00011116-M01, 1:1000	DAPI	2020-10-27	No.1
KAN570-11	RPE-BFP-Cas9 Kiz KO (pool)	Serum starved for 24 hours.	Fixed in 100% methanol at -20C for 5 minutes.	CP110, Proteintech, 12780-1-AP, 1:1000	CEP164, sc-515403, Santa Cruz, 1:250	FGFR1OP,H00011116-M01, 1:1000	DAPI	2020-10-27	No.1
KAN570-12	RPE-BFP-Cas9 sgPDE6D#1	Serum starved for 24 hours.	Fixed in 100% methanol at -20C for 5 minutes.	CP110, Proteintech, 12780-1-AP, 1:1000	CEP164, sc-515403, Santa Cruz, 1:250	FGFR1OP,H00011116-M01, 1:1000	DAPI	2020-10-27	No.1
KAN570-13	RPE-BFP-Cas9 sgLRRC45#1	Serum starved for 24 hours.	Fixed in 100% methanol at -20C for 5 minutes.	CP110, Proteintech, 12780-1-AP, 1:1000	CEP164, sc-515403, Santa Cruz, 1:250	FGFR1OP,H00011116-M01, 1:1000	DAPI	2020-10-27	No.1
Exp.2
KAN571-1	RPE-BFP-Cas9 pMCB306 (pool)	Serum starved for 24 hours.	Fixed in 100% methanol at -20C for 5 minutes.	CP110, Proteintech, 12780-1-AP, 1:1000	CEP164, sc-515403, Santa Cruz, 1:250	FGFR1OP,H00011116-M01, 1:1000	DAPI	2020-10-27	No.2
KAN571-2	RPE-BFP-Cas9 CEP164KO (pool)	Serum starved for 24 hours.	Fixed in 100% methanol at -20C for 5 minutes.	CP110, Proteintech, 12780-1-AP, 1:1000	CEP164, sc-515403, Santa Cruz, 1:250	FGFR1OP,H00011116-M01, 1:1000	DAPI	2020-10-27	No.2
KAN571-3	RPE-BFP-Cas9 CEP83 KO (pool)	Serum starved for 24 hours.	Fixed in 100% methanol at -20C for 5 minutes.	CP110, Proteintech, 12780-1-AP, 1:1000	CEP164, sc-515403, Santa Cruz, 1:250	FGFR1OP,H00011116-M01, 1:1000	DAPI	2020-10-27	No.2
KAN571-4	RPE-BFP-Cas9 SCLT1 KO (pool)	Serum starved for 24 hours.	Fixed in 100% methanol at -20C for 5 minutes.	CP110, Proteintech, 12780-1-AP, 1:1000	CEP164, sc-515403, Santa Cruz, 1:250	FGFR1OP,H00011116-M01, 1:1000	DAPI	2020-10-27	No.2
KAN571-5	RPE-BFP-Cas9 FBF1 KO (pool)	Serum starved for 24 hours.	Fixed in 100% methanol at -20C for 5 minutes.	CP110, Proteintech, 12780-1-AP, 1:1000	CEP164, sc-515403, Santa Cruz, 1:250	FGFR1OP,H00011116-M01, 1:1000	DAPI	2020-10-27	No.2
KAN571-6	RPE-BFP-Cas9 CEP89KO (pool)	Serum starved for 24 hours.	Fixed in 100% methanol at -20C for 5 minutes.	CP110, Proteintech, 12780-1-AP, 1:1000	CEP164, sc-515403, Santa Cruz, 1:250	FGFR1OP,H00011116-M01, 1:1000	DAPI	2020-10-27	No.2
KAN571-7	RPE-BFP-Cas9 CCDC92 KO (pool)	Serum starved for 24 hours.	Fixed in 100% methanol at -20C for 5 minutes.	CP110, Proteintech, 12780-1-AP, 1:1000	CEP164, sc-515403, Santa Cruz, 1:250	FGFR1OP,H00011116-M01, 1:1000	DAPI	2020-10-27	No.2
KAN571-8	RPE-BFP-Cas9 ANKRD26 KO (pool)	Serum starved for 24 hours.	Fixed in 100% methanol at -20C for 5 minutes.	CP110, Proteintech, 12780-1-AP, 1:1000	CEP164, sc-515403, Santa Cruz, 1:250	FGFR1OP,H00011116-M01, 1:1000	DAPI	2020-10-27	No.2
KAN571-9	RPE-BFP-Cas9 TTBK2 KO (pool)	Serum starved for 24 hours.	Fixed in 100% methanol at -20C for 5 minutes.	CP110, Proteintech, 12780-1-AP, 1:1000	CEP164, sc-515403, Santa Cruz, 1:250	FGFR1OP,H00011116-M01, 1:1000	DAPI	2020-10-27	No.2
KAN571-10	RPE-BFP-Cas9 INPP5E KO (pool)	Serum starved for 24 hours.	Fixed in 100% methanol at -20C for 5 minutes.	CP110, Proteintech, 12780-1-AP, 1:1000	CEP164, sc-515403, Santa Cruz, 1:250	FGFR1OP,H00011116-M01, 1:1000	DAPI	2020-10-27	No.2
KAN571-11	RPE-BFP-Cas9 Kiz KO (pool)	Serum starved for 24 hours.	Fixed in 100% methanol at -20C for 5 minutes.	CP110, Proteintech, 12780-1-AP, 1:1000	CEP164, sc-515403, Santa Cruz, 1:250	FGFR1OP,H00011116-M01, 1:1000	DAPI	2020-10-27	No.2
KAN571-12	RPE-BFP-Cas9 sgPDE6D#1	Serum starved for 24 hours.	Fixed in 100% methanol at -20C for 5 minutes.	CP110, Proteintech, 12780-1-AP, 1:1000	CEP164, sc-515403, Santa Cruz, 1:250	FGFR1OP,H00011116-M01, 1:1000	DAPI	2020-10-27	No.2
KAN571-13	RPE-BFP-Cas9 sgLRRC45#1	Serum starved for 24 hours.	Fixed in 100% methanol at -20C for 5 minutes.	CP110, Proteintech, 12780-1-AP, 1:1000	CEP164, sc-515403, Santa Cruz, 1:250	FGFR1OP,H00011116-M01, 1:1000	DAPI	2020-10-27	No.2
Exp.3
KAN572-1	RPE-BFP-Cas9 pMCB306 (pool)	Serum starved for 24 hours.	Fixed in 100% methanol at -20C for 5 minutes.	CP110, Proteintech, 12780-1-AP, 1:1000	CEP164, sc-515403, Santa Cruz, 1:250	FGFR1OP,H00011116-M01, 1:1000	DAPI	2020-10-27	No.3
KAN572-2	RPE-BFP-Cas9 CEP164KO (pool)	Serum starved for 24 hours.	Fixed in 100% methanol at -20C for 5 minutes.	CP110, Proteintech, 12780-1-AP, 1:1000	CEP164, sc-515403, Santa Cruz, 1:250	FGFR1OP,H00011116-M01, 1:1000	DAPI	2020-10-27	No.3
KAN572-3	RPE-BFP-Cas9 CEP83 KO (pool)	Serum starved for 24 hours.	Fixed in 100% methanol at -20C for 5 minutes.	CP110, Proteintech, 12780-1-AP, 1:1000	CEP164, sc-515403, Santa Cruz, 1:250	FGFR1OP,H00011116-M01, 1:1000	DAPI	2020-10-27	No.3
KAN572-4	RPE-BFP-Cas9 SCLT1 KO (pool)	Serum starved for 24 hours.	Fixed in 100% methanol at -20C for 5 minutes.	CP110, Proteintech, 12780-1-AP, 1:1000	CEP164, sc-515403, Santa Cruz, 1:250	FGFR1OP,H00011116-M01, 1:1000	DAPI	2020-10-27	No.3
KAN572-5	RPE-BFP-Cas9 FBF1 KO (pool)	Serum starved for 24 hours.	Fixed in 100% methanol at -20C for 5 minutes.	CP110, Proteintech, 12780-1-AP, 1:1000	CEP164, sc-515403, Santa Cruz, 1:250	FGFR1OP,H00011116-M01, 1:1000	DAPI	2020-10-27	No.3
KAN572-6	RPE-BFP-Cas9 CEP89KO (pool)	Serum starved for 24 hours.	Fixed in 100% methanol at -20C for 5 minutes.	CP110, Proteintech, 12780-1-AP, 1:1000	CEP164, sc-515403, Santa Cruz, 1:250	FGFR1OP,H00011116-M01, 1:1000	DAPI	2020-10-27	No.3
KAN572-7	RPE-BFP-Cas9 CCDC92 KO (pool)	Serum starved for 24 hours.	Fixed in 100% methanol at -20C for 5 minutes.	CP110, Proteintech, 12780-1-AP, 1:1000	CEP164, sc-515403, Santa Cruz, 1:250	FGFR1OP,H00011116-M01, 1:1000	DAPI	2020-10-27	No.3
KAN572-8	RPE-BFP-Cas9 ANKRD26 KO (pool)	Serum starved for 24 hours.	Fixed in 100% methanol at -20C for 5 minutes.	CP110, Proteintech, 12780-1-AP, 1:1000	CEP164, sc-515403, Santa Cruz, 1:250	FGFR1OP,H00011116-M01, 1:1000	DAPI	2020-10-27	No.3
KAN572-9	RPE-BFP-Cas9 TTBK2 KO (pool)	Serum starved for 24 hours.	Fixed in 100% methanol at -20C for 5 minutes.	CP110, Proteintech, 12780-1-AP, 1:1000	CEP164, sc-515403, Santa Cruz, 1:250	FGFR1OP,H00011116-M01, 1:1000	DAPI	2020-10-27	No.3
KAN572-10	RPE-BFP-Cas9 INPP5E KO (pool)	Serum starved for 24 hours.	Fixed in 100% methanol at -20C for 5 minutes.	CP110, Proteintech, 12780-1-AP, 1:1000	CEP164, sc-515403, Santa Cruz, 1:250	FGFR1OP,H00011116-M01, 1:1000	DAPI	2020-10-27	No.3
KAN572-11	RPE-BFP-Cas9 Kiz KO (pool)	Serum starved for 24 hours.	Fixed in 100% methanol at -20C for 5 minutes.	CP110, Proteintech, 12780-1-AP, 1:1000	CEP164, sc-515403, Santa Cruz, 1:250	FGFR1OP,H00011116-M01, 1:1000	DAPI	2020-10-27	No.3
KAN572-12	RPE-BFP-Cas9 sgPDE6D#1	Serum starved for 24 hours.	Fixed in 100% methanol at -20C for 5 minutes.	CP110, Proteintech, 12780-1-AP, 1:1000	CEP164, sc-515403, Santa Cruz, 1:250	FGFR1OP,H00011116-M01, 1:1000	DAPI	2020-10-27	No.3
KAN572-13	RPE-BFP-Cas9 sgLRRC45#1	Serum starved for 24 hours.	Fixed in 100% methanol at -20C for 5 minutes.	CP110, Proteintech, 12780-1-AP, 1:1000	CEP164, sc-515403, Santa Cruz, 1:250	FGFR1OP,H00011116-M01, 1:1000	DAPI	2020-10-27	No.3

## Sheet: Statistics
	Table Analyzed	Data 1		Table Analyzed	Data 1		Table Analyzed	Data 1		Table Analyzed	Data 1		Table Analyzed	Data 1		Table Analyzed	Data 1		Table Analyzed	Data 1		Table Analyzed	Data 1		Table Analyzed	Data 1		Table Analyzed	Data 1
	Column B	CEP164 KO		Column C	CEP83 KO		Column D	SCLT1 KO		Column E	FBF1 KO		Column F	CEP89 KO		Column H	ANKRD26 KO		Column I	TTBK2 KO		Column J	INPP5E KO		Column K	KIZ KO		Column L	sgLRRC45
	vs.	vs.		vs.	vs.		vs.	vs.		vs.	vs.		vs.	vs.		vs.	vs.		vs.	vs.		vs.	vs.		vs.	vs.		vs.	vs.
	Column A	pMCB306		Column A	pMCB306		Column A	pMCB306		Column A	pMCB306		Column A	pMCB306		Column A	pMCB306		Column A	pMCB306		Column A	pMCB306		Column A	pMCB306		Column A	pMCB306
	Unpaired t test with Welch's correction			Unpaired t test with Welch's correction			Unpaired t test with Welch's correction			Unpaired t test with Welch's correction			Unpaired t test with Welch's correction			Unpaired t test with Welch's correction			Unpaired t test with Welch's correction			Unpaired t test with Welch's correction			Unpaired t test with Welch's correction			Unpaired t test with Welch's correction
	P value	<0.0001		P value	0.0001		P value	<0.0001		P value	0.0115		P value	0.0006		P value	0.4324		P value	<0.0001		P value	0.2986		P value	0.176		P value	0.0494
	P value summary	****		P value summary	***		P value summary	****		P value summary	*		P value summary	***		P value summary	ns		P value summary	****		P value summary	ns		P value summary	ns		P value summary	*
	Significantly different (P < 0.05)?	Yes		Significantly different (P < 0.05)?	Yes		Significantly different (P < 0.05)?	Yes		Significantly different (P < 0.05)?	Yes		Significantly different (P < 0.05)?	Yes		Significantly different (P < 0.05)?	No		Significantly different (P < 0.05)?	Yes		Significantly different (P < 0.05)?	No		Significantly different (P < 0.05)?	No		Significantly different (P < 0.05)?	Yes
	One- or two-tailed P value?	Two-tailed		One- or two-tailed P value?	Two-tailed		One- or two-tailed P value?	Two-tailed		One- or two-tailed P value?	Two-tailed		One- or two-tailed P value?	Two-tailed		One- or two-tailed P value?	Two-tailed		One- or two-tailed P value?	Two-tailed		One- or two-tailed P value?	Two-tailed		One- or two-tailed P value?	Two-tailed		One- or two-tailed P value?	Two-tailed
	Welch-corrected t, df	t=40.56, df=3.300		Welch-corrected t, df	t=76.06, df=2.122		Welch-corrected t, df	t=50.39, df=3.904		Welch-corrected t, df	t=6.424, df=2.613		Welch-corrected t, df	t=10.12, df=3.931		Welch-corrected t, df	t=0.8923, df=3.304		Welch-corrected t, df	t=63.61, df=3.741		Welch-corrected t, df	t=1.255, df=2.990		Welch-corrected t, df	t=1.698, df=3.453		Welch-corrected t, df	t=4.051, df=2.152
	How big is the difference?			How big is the difference?			How big is the difference?			How big is the difference?			How big is the difference?			How big is the difference?			How big is the difference?			How big is the difference?			How big is the difference?			How big is the difference?
	Mean of column A	5.373		Mean of column A	5.373		Mean of column A	5.373		Mean of column A	5.373		Mean of column A	5.373		Mean of column A	5.373		Mean of column A	5.373		Mean of column A	5.373		Mean of column A	5.373		Mean of column A	5.373
	Mean of column B	96.2		Mean of column C	95.14		Mean of column D	95.63		Mean of column E	13.41		Mean of column F	23.24		Mean of column H	7.368		Mean of column I	98.45		Mean of column J	8.562		Mean of column K	8.97		Mean of column L	10.17
	Difference between means (B - A) ± SEM	90.83 ± 2.239		Difference between means (C - A) ± SEM	89.77 ± 1.180		Difference between means (D - A) ± SEM	90.25 ± 1.791		Difference between means (E - A) ± SEM	8.034 ± 1.251		Difference between means (F - A) ± SEM	17.86 ± 1.765		Difference between means (H - A) ± SEM	1.995 ± 2.236		Difference between means (I - A) ± SEM	93.08 ± 1.463		Difference between means (J - A) ± SEM	3.189 ± 2.541		Difference between means (K - A) ± SEM	3.597 ± 2.119		Difference between means (L - A) ± SEM	4.799 ± 1.185
	95% confidence interval	84.06 to 97.61		95% confidence interval	84.96 to 94.58		95% confidence interval	85.23 to 95.28		95% confidence interval	3.699 to 12.37		95% confidence interval	12.93 to 22.80		95% confidence interval	-4.764 to 8.754		95% confidence interval	88.90 to 97.26		95% confidence interval	-4.914 to 11.29		95% confidence interval	-2.673 to 9.867		95% confidence interval	0.03117 to 9.566
	R squared (eta squared)	0.998		R squared (eta squared)	0.9996		R squared (eta squared)	0.9985		R squared (eta squared)	0.9404		R squared (eta squared)	0.963		R squared (eta squared)	0.1942		R squared (eta squared)	0.9991		R squared (eta squared)	0.345		R squared (eta squared)	0.4549		R squared (eta squared)	0.8841
	F test to compare variances			F test to compare variances			F test to compare variances			F test to compare variances			F test to compare variances			F test to compare variances			F test to compare variances			F test to compare variances			F test to compare variances			F test to compare variances
	F, DFn, Dfd	2.709, 2, 2		F, DFn, Dfd	32.82, 2, 2		F, DFn, Dfd	1.372, 2, 2		F, DFn, Dfd	6.367, 2, 2		F, DFn, Dfd	1.304, 2, 2		F, DFn, Dfd	2.698, 2, 2		F, DFn, Dfd	1.713, 2, 2		F, DFn, Dfd	3.776, 2, 2		F, DFn, Dfd	2.322, 2, 2		F, DFn, Dfd	26.32, 2, 2
	P value	0.5392		P value	0.0591		P value	0.843		P value	0.2715		P value	0.868		P value	0.5409		P value	0.7371		P value	0.4187		P value	0.6021		P value	0.0732
	P value summary	ns		P value summary	ns		P value summary	ns		P value summary	ns		P value summary	ns		P value summary	ns		P value summary	ns		P value summary	ns		P value summary	ns		P value summary	ns
	Significantly different (P < 0.05)?	No		Significantly different (P < 0.05)?	No		Significantly different (P < 0.05)?	No		Significantly different (P < 0.05)?	No		Significantly different (P < 0.05)?	No		Significantly different (P < 0.05)?	No		Significantly different (P < 0.05)?	No		Significantly different (P < 0.05)?	No		Significantly different (P < 0.05)?	No		Significantly different (P < 0.05)?	No
	Data analyzed			Data analyzed			Data analyzed			Data analyzed			Data analyzed			Data analyzed			Data analyzed			Data analyzed			Data analyzed			Data analyzed
	Sample size, column A	3		Sample size, column A	3		Sample size, column A	3		Sample size, column A	3		Sample size, column A	3		Sample size, column A	3		Sample size, column A	3		Sample size, column A	3		Sample size, column A	3		Sample size, column A	3
	Sample size, column B	3		Sample size, column C	3		Sample size, column D	3		Sample size, column E	3		Sample size, column F	3		Sample size, column H	3		Sample size, column I	3		Sample size, column J	3		Sample size, column K	3		Sample size, column L	3
	Number of families	1
	Number of comparisons per family	11
	Alpha	0.05
	Dunnett's multiple comparisons test	Mean Diff.	95.00% CI of diff.	Below threshold?	Summary	Adjusted P Value	A-?
	pMCB306 vs. CEP164 KO	-90.83	-96.89 to -84.77	Yes	****	<0.0001	B	CEP164 KO
	pMCB306 vs. CEP83 KO	-89.77	-95.83 to -83.71	Yes	****	<0.0001	C	CEP83 KO
	pMCB306 vs. SCLT1 KO	-90.25	-96.32 to -84.19	Yes	****	<0.0001	D	SCLT1 KO
	pMCB306 vs. FBF1 KO	-8.034	-14.10 to -1.972	Yes	**	0.0054	E	FBF1 KO
	pMCB306 vs. CEP89 KO	-17.86	-23.93 to -11.80	Yes	****	<0.0001	F	CEP89 KO
	pMCB306 vs. CCDC92 KO	-1.642	-7.705 to 4.420	No	ns	0.982	G	CCDC92 KO
	pMCB306 vs. ANKRD26 KO	-1.995	-8.057 to 4.067	No	ns	0.9392	H	ANKRD26 KO
	pMCB306 vs. TTBK2 KO	-93.08	-99.14 to -87.02	Yes	****	<0.0001	I	TTBK2 KO
	pMCB306 vs. INPP5E KO	-3.189	-9.251 to 2.873	No	ns	0.5908	J	INPP5E KO
	pMCB306 vs. KIZ KO	-3.597	-9.660 to 2.465	No	ns	0.4561	K	KIZ KO
	pMCB306 vs. sgLRRC45	-4.799	-10.86 to 1.264	No	ns	0.1739	L	sgLRRC45
	Test details	Mean 1	Mean 2	Mean Diff.	SE of diff.	n1	n2	q	DF
	pMCB306 vs. CEP164 KO	5.373	96.2	-90.83	2.043	3	3	44.47	24
	pMCB306 vs. CEP83 KO	5.373	95.14	-89.77	2.043	3	3	43.95	24
	pMCB306 vs. SCLT1 KO	5.373	95.63	-90.25	2.043	3	3	44.18	24
	pMCB306 vs. FBF1 KO	5.373	13.41	-8.034	2.043	3	3	3.933	24
	pMCB306 vs. CEP89 KO	5.373	23.24	-17.86	2.043	3	3	8.745	24
	pMCB306 vs. CCDC92 KO	5.373	7.015	-1.642	2.043	3	3	0.804	24
	pMCB306 vs. ANKRD26 KO	5.373	7.368	-1.995	2.043	3	3	0.9766	24
	pMCB306 vs. TTBK2 KO	5.373	98.45	-93.08	2.043	3	3	45.57	24
	pMCB306 vs. INPP5E KO	5.373	8.562	-3.189	2.043	3	3	1.561	24
	pMCB306 vs. KIZ KO	5.373	8.97	-3.597	2.043	3	3	1.761	24
	pMCB306 vs. sgLRRC45	5.373	10.17	-4.799	2.043	3	3	2.349	24
