# Supplementary material for: A hierarchical pathway for assembly of the distal appendages that organize primary cilia
Source: eLife. 2025 Jan 30;14:e85999. doi: 10.7554/eLife.85999 (PMC11984956; doi:10.7554/eLife.85999)
Supplement: Figure 5—source data 5. [file elife-85999-fig5-data5.xlsx]

## Sheet: Raw data
	Label	Area	Mean	Min	Max	X	Y	Circ	IntDen	RawIntDen	AR	Round	Solidity
499	IFT88_KAN627-1_1.tif:0001-0023	0.876	62	0	454	126.621	2.599	0.956	54.312	4216	1.132	0.883	0.971	0.244584
500	IFT88_KAN627-1_1.tif:0002-0034	0.915	116.141	0	421	14.059	3.913	0.715	106.227	8246	1.794	0.557	0.835	0.478377
501	IFT88_KAN627-1_1.tif:0003-0036	1.198	208	0	849	54.999	4.124	0.937	249.194	19344	1.254	0.797	0.974	1.12221
502	IFT88_KAN627-1_1.tif:0004-0074	1.043	26.951	0	113	33.249	8.45	0.985	28.122	2183	1.238	0.808	0.959	0.126643
503	IFT88_KAN627-1_1.tif:0005-0167	0.438	4.853	0	32	77.748	18.955	1	2.126	165	1.141	0.876	0.971	0.00957218
504	IFT88_KAN627-1_1.tif:0006-0199	1.868	119.903	0	861	112.261	22.676	0.806	223.971	17386	1.714	0.584	0.912	1.00862
505	IFT88_KAN627-1_1.tif:0007-0215	0.631	200.367	1	656	25.14	24.459	0.935	126.478	9818	1	1	1	0.569574
506	IFT88_KAN627-1_1.tif:0008-0275	1.855	92.528	0	638	57.513	31.283	0.755	171.643	13324	1.94	0.515	0.892	0.772968
507	IFT88_KAN627-1_1.tif:0009-0367	1.327	141.738	0	782	83.541	41.65	0.709	188.068	14599	1.727	0.579	0.834	0.846935
508	IFT88_KAN627-1_1.tif:0010-0423	1.623	86.365	0	545	55.556	48.065	0.804	140.185	10882	1.613	0.62	0.887	0.6313
509	IFT88_KAN627-1_1.tif:0011-0442	1.469	108.456	0	624	93.751	50.205	0.755	159.276	12364	1.727	0.579	0.857	0.717275
510	IFT88_KAN627-1_1.tif:0012-0509	1.572	113.082	0	800	85.332	57.843	0.758	177.724	13796	1.691	0.592	0.865	0.80035
511	IFT88_KAN627-1_1.tif:0013-0635	0.631	155.592	15	537	83.706	72.129	0.935	98.214	7624	1	1	1	0.442293
512	IFT88_KAN627-1_1.tif:0014-0660	0.992	26.675	0	120	132.234	74.915	0.951	26.46	2054	1.25	0.8	0.981	0.119159
513	IFT88_KAN627-1_1.tif:0015-0675	1.198	205.86	0	851	82.441	76.659	0.937	246.631	19145	1.242	0.805	0.969	1.11066
514	IFT88_KAN627-1_1.tif:0016-0704	1.507	98.855	0	547	29.553	79.883	0.755	148.996	11566	1.552	0.644	0.87	0.670981
515	IFT88_KAN627-1_1.tif:0017-0939	0.85	146.97	0	524	64.16	106.568	0.846	124.958	9700	1.522	0.657	0.904	0.562728
516	IFT88_KAN627-1_1.tif:0018-1039	1.069	115.169	0	431	45.795	117.97	0.836	123.141	9559	1.5	0.666	0.917	0.554548
517	IFT88_KAN627-1_1.tif:0019-1077	1.559	88.521	0	493	99.413	122.342	0.714	137.982	10711	1.665	0.601	0.849	0.621379
518	IFT88_KAN627-1_1.tif:0020-1091	1.185	166.652	0	775	123.001	123.829	0.945	197.511	15332	1.376	0.727	0.934	0.889458
519	IFT88_KAN627-1_1.tif:0021-1186	0.76	105.525	0	323	8.844	134.602	0.953	80.205	6226	1.109	0.902	0.959	0.36119
520	IFT88_KAN627-1_2.tif:0001-0040	1.52	120.195	0	830	124.457	4.574	0.803	182.709	14183	1.278	0.783	0.884	0.822801
521	IFT88_KAN627-1_2.tif:0002-0121	1.262	197.429	0	971	50.653	13.761	0.913	249.246	19348	1.379	0.725	0.956	1.12244
522	IFT88_KAN627-1_2.tif:0003-0319	0.631	207.102	6	639	17.876	36.263	0.935	130.729	10148	1	1	1	0.588718
523	IFT88_KAN627-1_2.tif:0004-0362	1.456	106.752	0	567	107.799	41.119	0.871	155.399	12063	1.586	0.631	0.93	0.699813
524	IFT88_KAN627-1_2.tif:0005-0380	0.902	209.8	0	721	109.528	43.187	0.947	189.189	14686	1.146	0.873	0.986	0.851982
525	IFT88_KAN627-1_2.tif:0006-0470	0.593	111.565	0	558	83.033	53.407	0.964	66.112	5132	1.15	0.87	0.968	0.297724
526	IFT88_KAN627-1_2.tif:0007-0594	1.211	133.766	0	590	125.964	67.512	0.934	161.981	12574	1.327	0.753	0.945	0.729458
527	IFT88_KAN627-1_2.tif:0008-0652	0.322	124.84	22	288	58.396	74.059	1	40.206	3121	1	1	1	0.181059
528	IFT88_KAN627-1_2.tif:0009-0765	1.559	106.19	0	641	96.912	86.881	0.793	165.524	12849	1.651	0.606	0.874	0.745412
529	IFT88_KAN627-1_2.tif:0010-0969	0.824	175.406	0	594	129.617	109.982	0.914	144.616	11226	1	1	1	0.651256
530	IFT88_KAN627-1_2.tif:0011-1098	0.721	179.536	0	589	43.527	124.623	0.92	129.518	10054	1.143	0.875	1	0.583265
531	IFT88_KAN627-1_3.tif:0001-0033	0.721	17.554	0	77	9.421	3.756	0.985	12.663	983	1.229	0.814	0.949	0.057027
532	IFT88_KAN627-1_3.tif:0002-0050	1.378	198.579	0	1161	52.726	5.734	0.953	273.722	21248	1.11	0.901	0.947	1.23266
533	IFT88_KAN627-1_3.tif:0003-0061	0.696	34.296	0	148	78.332	6.902	0.836	23.858	1852	1.82	0.549	0.947	0.10744
534	IFT88_KAN627-1_3.tif:0004-0074	0.631	192.449	0	476	51.699	8.456	0.935	121.48	9430	1	1	1	0.547064
535	IFT88_KAN627-1_3.tif:0005-0242	1.366	104.425	0	548	122.986	27.465	0.851	142.594	11069	1.381	0.724	0.902	0.642148
536	IFT88_KAN627-1_3.tif:0006-0263	1.224	233.653	0	1080	22.297	29.895	0.897	285.947	22197	1.225	0.816	0.979	1.28772
537	IFT88_KAN627-1_3.tif:0007-0271	1.018	127.152	0	393	65.174	30.837	0.807	129.402	10045	1.798	0.556	0.969	0.582743
538	IFT88_KAN627-1_3.tif:0008-0377	1.791	140.82	0	1059	48.046	42.786	0.765	252.157	19574	1.719	0.582	0.874	1.13555
539	IFT88_KAN627-1_3.tif:0009-0389	1.881	103.534	0	791	73.701	44.185	0.654	194.728	15116	1.809	0.553	0.802	0.876927
540	IFT88_KAN627-1_3.tif:0010-0399	0.322	7.24	0	33	25.821	45.343	1	2.332	181	1	1	1	0.0105004
541	IFT88_KAN627-1_3.tif:0011-0473	1.713	107.662	0	708	95.064	53.763	0.848	184.461	14319	1.623	0.616	0.92	0.830691
542	IFT88_KAN627-1_3.tif:0012-0503	2.048	375.679	0	1812	32.759	57.14	0.915	769.496	59733	1.055	0.948	0.972	3.4653
543	IFT88_KAN627-1_3.tif:0013-0612	0.812	209.492	0	781	55.268	69.468	0.937	170.02	13198	1.039	0.963	0.992	0.765658
544	IFT88_KAN627-1_3.tif:0014-0620	1.095	40.141	0	178	4.125	70.412	0.916	43.954	3412	1.37	0.73	0.929	0.197941
545	IFT88_KAN627-1_3.tif:0015-0741	1.159	137.767	0	643	111.006	84.106	1	159.727	12399	1.139	0.878	0.957	0.719306
546	IFT88_KAN627-1_3.tif:0016-0825	1.804	349.914	0	1957	42.115	93.685	0.979	631.076	48988	1.104	0.905	0.966	2.84195
547	IFT88_KAN627-1_3.tif:0017-0934	0.773	191.783	0	644	84.372	106.087	0.929	148.236	11507	1.305	0.766	0.984	0.667558
548	IFT88_KAN627-1_3.tif:0018-0997	1.494	133.043	0	657	46.459	113.138	0.821	198.812	15433	1.7	0.588	0.917	0.895318
549	IFT88_KAN627-1_3.tif:0019-1046	0.953	104.635	0	482	23.323	118.667	0.668	99.747	7743	1.988	0.503	0.813	0.449196
550	IFT88_KAN627-1_3.tif:0020-1094	0.863	11.09	0	60	95.573	124.221	0.98	9.572	743	1.211	0.826	0.971	0.0431038
551	IFT88_KAN627-1_4.tif:0001-0078	0.451	29.914	0	174	49.494	8.845	0.991	13.488	1047	1.065	0.939	0.986	0.0607398
552	IFT88_KAN627-1_4.tif:0002-0118	0.812	171.952	2	446	125.298	13.387	0.937	139.553	10833	1.039	0.963	0.992	0.628457
553	IFT88_KAN627-1_4.tif:0003-0202	1.121	248.011	0	1031	106.684	22.979	0.951	277.96	21577	1.114	0.897	0.983	1.25175
554	IFT88_KAN627-1_4.tif:0004-0215	0.721	198.357	8	438	8.456	24.403	0.92	143.096	11108	1.143	0.875	1	0.644411
555	IFT88_KAN627-1_4.tif:0005-0477	1.237	120.438	0	594	73.354	54.136	0.771	148.945	11562	1.728	0.579	0.861	0.670749
556	IFT88_KAN627-1_4.tif:0006-0541	0.915	139.535	0	591	25.02	61.449	0.91	127.624	9907	1.309	0.764	0.934	0.574737
557	IFT88_KAN627-1_4.tif:0007-0684	0.915	226.225	0	665	13.058	77.697	0.924	206.915	16062	1.13	0.885	0.993	0.931808
558	IFT88_KAN627-1_4.tif:0008-0692	0.902	205.014	5	698	135.53	78.599	0.947	184.873	14351	1.125	0.889	0.986	0.832547
559	IFT88_KAN627-1_4.tif:0009-0736	1.288	164.86	0	969	111.945	83.503	0.932	212.377	16486	1.331	0.751	0.976	0.956406
560	IFT88_KAN627-1_4.tif:0010-0847	1.211	121.862	0	678	35.914	96.174	0.837	147.566	11455	1.589	0.629	0.917	0.664541
561	IFT88_KAN627-1_4.tif:0011-0863	1.378	176.187	0	953	86.755	98.023	0.924	242.856	18852	1.499	0.667	0.96	1.09366
562	IFT88_KAN627-1_4.tif:0012-0922	0.721	227.196	11	1047	61.404	104.704	0.92	163.901	12723	1.143	0.875	1	0.738102
563	IFT88_KAN627-1_4.tif:0013-1014	0.631	181.143	0	952	60.212	115.146	0.935	114.343	8876	1	1	1	0.514925
564	IFT88_KAN627-1_4.tif:0014-1027	0.528	20.829	0	162	6.576	116.63	0.968	11.001	854	1.176	0.85	0.988	0.0495433
565	IFT88_KAN627-1_4.tif:0015-1100	0.76	98.22	0	413	117.389	124.907	0.953	74.653	5795	1.297	0.771	0.967	0.336186
566	IFT88_KAN627-1_4.tif:0016-1146	0.386	97.533	0	270	47.046	130.071	0.976	37.693	2926	1.2	0.833	1	0.169747
										12017.8				0.697189
														0
														0
														0
567	IFT88_KAN627-2_1.tif:0001-0027	0.631	28.755	0	134	75.24	3.119	0.918	18.151	1409	1.359	0.736	0.933	0.0817406
568	IFT88_KAN627-2_1.tif:0002-0124	0.528	29.78	0	117	1.087	14.067	0.968	15.729	1221	1.176	0.85	0.988	0.0708341
569	IFT88_KAN627-2_1.tif:0003-0128	0.747	33.431	0	125	43.152	14.506	0.936	24.979	1939	1.217	0.822	0.959	0.112488
570	IFT88_KAN627-2_1.tif:0004-0293	0.966	28.64	0	118	76.141	33.346	0.912	27.671	2148	1.373	0.728	0.926	0.124612
571	IFT88_KAN627-2_1.tif:0005-0339	0.76	36.542	0	97	126.548	38.458	0.994	27.774	2156	1.112	0.899	0.967	0.125076
572	IFT88_KAN627-2_1.tif:0006-0459	0.644	38.96	0	129	42.744	52.085	0.981	25.095	1948	1.294	0.773	0.943	0.11301
573	IFT88_KAN627-2_1.tif:0007-0487	0.734	19.018	0	85	130.197	55.281	0.759	13.964	1084	1.816	0.551	0.832	0.0628863
574	IFT88_KAN627-2_1.tif:0008-0639	0.451	9.857	0	34	116.459	72.518	0.991	4.444	345	1.065	0.939	0.986	0.0200146
575	IFT88_KAN627-2_1.tif:0009-0659	0.734	6.561	0	31	57.054	74.865	0.92	4.818	374	1.367	0.731	0.95	0.0216969
576	IFT88_KAN627-2_1.tif:0010-0711	0.322	28.48	0	70	24.119	80.755	1	9.172	712	1	1	1	0.0413054
577	IFT88_KAN627-2_1.tif:0011-0762	0.657	18.176	0	66	88.869	86.553	0.955	11.942	927	1.269	0.788	0.953	0.0537782
578	IFT88_KAN627-2_1.tif:0012-0924	0.76	37.763	0	98	95.635	104.933	0.953	28.702	2228	1.306	0.766	0.967	0.129253
579	IFT88_KAN627-2_1.tif:0013-0983	0.322	16.72	0	140	64.184	111.627	1	5.385	418	1	1	1	0.0242495
580	IFT88_KAN627-2_2.tif:0001-0081	0.618	24.542	0	89	14.024	9.243	0.96	15.175	1178	1.049	0.953	0.99	0.0683395
581	IFT88_KAN627-2_2.tif:0002-0145	0.863	11.03	0	62	121.824	16.453	0.98	9.52	739	1.159	0.863	0.971	0.0428718
582	IFT88_KAN627-2_2.tif:0003-0201	0.67	16.019	0	55	78.883	22.87	0.974	10.731	833	1.25	0.8	0.963	0.048325
583	IFT88_KAN627-2_2.tif:0004-0240	0.928	8.792	0	54	33.697	27.208	0.923	8.154	633	1.282	0.78	0.954	0.0367224
584	IFT88_KAN627-2_2.tif:0005-0285	0.451	33	0	94	43.592	32.339	0.991	14.879	1155	1.065	0.939	0.986	0.0670052
585	IFT88_KAN627-2_2.tif:0006-0378	1.018	10.468	0	57	104.188	42.973	0.961	10.654	827	1.093	0.915	0.946	0.0479769
586	IFT88_KAN627-2_2.tif:0007-0547	0.593	35.783	0	122	55.551	62.146	0.964	21.204	1646	1.15	0.87	0.968	0.0954897
587	IFT88_KAN627-2_2.tif:0008-0611	0.541	15	0	62	87.565	69.349	0.943	8.116	630	1.167	0.857	1	0.0365483
588	IFT88_KAN627-2_2.tif:0009-0619	0.631	215.796	18	866	11.066	70.313	0.935	136.217	10574	1	1	1	0.613432
589	IFT88_KAN627-2_2.tif:0010-0679	0.863	29.881	0	128	132.96	77.074	0.942	25.79	2002	1.424	0.702	0.978	0.116142
590	IFT88_KAN627-2_2.tif:0011-0680	1.147	17.921	0	81	117.24	77.176	0.993	20.547	1595	1.026	0.975	0.957	0.092531
591	IFT88_KAN627-2_2.tif:0012-0798	0.902	39.086	0	196	30.193	90.571	0.968	35.246	2736	1.318	0.759	0.94	0.158724
592	IFT88_KAN627-2_2.tif:0013-0798	1.056	22.171	0	102	53.972	90.563	0.897	23.42	1818	1.419	0.705	0.965	0.105468
593	IFT88_KAN627-2_2.tif:0014-1110	0.322	10	0	31	66.454	126.042	1	3.221	250	1	1	1	0.0145033
594	IFT88_KAN627-2_3.tif:0001-0045	0.322	18.88	0	52	29.34	5.164	1	6.08	472	1	1	1	0.0273822
595	IFT88_KAN627-2_3.tif:0002-0070	0.451	18.486	0	70	111.676	7.953	0.991	8.335	647	1.065	0.939	0.986	0.0375345
596	IFT88_KAN627-2_3.tif:0003-0083	0.902	12.286	0	49	125.586	9.474	1	11.079	860	1.14	0.877	0.94	0.0498913
597	IFT88_KAN627-2_3.tif:0004-0174	0.966	30.027	0	162	71.211	19.795	0.998	29.011	2252	1.056	0.947	0.968	0.130646
598	IFT88_KAN627-2_3.tif:0005-0281	0.876	16.971	0	73	65.091	31.882	0.956	14.866	1154	1.151	0.869	0.971	0.0669472
599	IFT88_KAN627-2_3.tif:0006-0312	1.031	33.575	0	140	35.76	35.466	0.939	34.602	2686	1.142	0.875	0.947	0.155823
600	IFT88_KAN627-2_3.tif:0007-0366	1.211	9.287	0	63	18.571	41.583	0.917	11.246	873	1.267	0.789	0.979	0.0506455
601	IFT88_KAN627-2_3.tif:0008-0441	0.915	340.423	0	2224	132.972	50.059	0.924	311.364	24170	1.13	0.885	0.993	1.40218
602	IFT88_KAN627-2_3.tif:0009-0550	0.67	38	0	187	95.013	62.495	0.974	25.455	1976	1.153	0.867	0.963	0.114634
603	IFT88_KAN627-2_3.tif:0010-0557	0.67	34.596	0	95	69.986	63.228	0.932	23.175	1799	1.247	0.802	0.963	0.104366
604	IFT88_KAN627-2_3.tif:0011-0567	0.451	17.229	0	63	8.115	64.411	0.938	7.768	603	1.4	0.714	1	0.034982
605	IFT88_KAN627-2_3.tif:0012-0618	0.515	21.95	0	70	25.779	70.2	0.994	11.311	878	1.166	0.857	0.976	0.0509356
606	IFT88_KAN627-2_3.tif:0013-0621	0.812	179.27	0	708	15.833	70.54	0.9	145.492	11294	1.286	0.778	1	0.655201
607	IFT88_KAN627-2_3.tif:0014-0843	0.67	25.827	0	79	28.532	95.683	0.974	17.301	1343	1.179	0.848	0.963	0.0779117
608	IFT88_KAN627-2_3.tif:0015-0855	0.966	28.92	0	173	75.209	97.031	0.983	27.942	2169	1.328	0.753	0.932	0.125831
609	IFT88_KAN627-2_3.tif:0016-0982	1.056	20.354	0	72	116.483	111.525	0.962	21.5	1669	1.115	0.897	0.965	0.096824
610	IFT88_KAN627-2_3.tif:0017-1016	0.605	19.766	0	59	94.503	115.361	0.94	11.968	929	1.09	0.917	0.979	0.0538943
611	IFT88_KAN627-2_3.tif:0018-1068	0.451	39.314	0	142	80.642	121.275	0.938	17.726	1376	1.4	0.714	1	0.0798262
612	IFT88_KAN627-2_3.tif:0019-1116	0.85	19.697	0	84	35.345	126.656	0.892	16.747	1300	1.482	0.675	0.971	0.0754172
613	IFT88_KAN627-2_4.tif:0001-0036	0.386	7.833	0	29	53.005	4.143	0.976	3.027	235	1.2	0.833	1	0.0136331
614	IFT88_KAN627-2_4.tif:0002-0057	0.67	25.25	0	117	143.761	6.445	0.932	16.914	1313	1.184	0.844	0.963	0.0761713
615	IFT88_KAN627-2_4.tif:0003-0073	0.322	31.44	0	88	5.278	8.342	1	10.125	786	1	1	1	0.0455984
616	IFT88_KAN627-2_4.tif:0004-0114	0.528	11.537	0	89	25.771	13.004	0.968	6.093	473	1.176	0.85	0.988	0.0274402
617	IFT88_KAN627-2_4.tif:0005-0157	0.979	20.697	0	122	98.927	17.817	0.924	20.264	1573	1.43	0.699	0.95	0.0912548
618	IFT88_KAN627-2_4.tif:0006-0277	0.799	173.516	0	531	23.495	31.44	0.96	138.587	10758	1.081	0.925	0.984	0.624106
619	IFT88_KAN627-2_4.tif:0007-0430	0.605	26	0	143	46.947	48.862	0.985	15.742	1222	1.002	0.998	0.979	0.0708921
620	IFT88_KAN627-2_4.tif:0008-0543	0.386	39.3	0	95	30.305	61.687	0.976	15.188	1179	1.2	0.833	1	0.0683976
621	IFT88_KAN627-2_4.tif:0009-0732	0.451	21.371	0	65	53.515	83.139	0.938	9.636	748	1.4	0.714	1	0.0433939
622	IFT88_KAN627-2_4.tif:0010-0737	1.288	44.82	0	185	107.018	83.64	0.949	57.738	4482	1.228	0.814	0.939	0.260015
623	IFT88_KAN627-2_4.tif:0011-0876	1.005	9.244	0	54	77.774	99.397	0.883	9.288	721	1.292	0.774	0.934	0.0418275
624	IFT88_KAN627-2_4.tif:0012-0909	0.541	59.31	0	308	16.344	103.228	0.943	32.09	2491	1.167	0.857	1	0.144511
625	IFT88_KAN627-2_4.tif:0013-0937	0.721	184.125	0	832	91.311	106.35	0.92	132.829	10311	1.143	0.875	1	0.598174
626	IFT88_KAN627-2_4.tif:0014-1106	0.58	8.667	0	40	100.504	125.588	0.859	5.024	390	1.8	0.556	1	0.0226251
627	IFT88_KAN627-2_5.tif:0001-0091	0.721	13.732	0	51	105.847	10.387	0.904	9.906	769	1.446	0.691	0.949	0.0446121
628	IFT88_KAN627-2_5.tif:0002-0149	0.386	11.9	0	44	62.709	16.912	0.976	4.599	357	1.2	0.833	1	0.0207107
629	IFT88_KAN627-2_5.tif:0003-0324	0.966	27.28	0	120	27.842	36.844	0.88	26.357	2046	1.222	0.818	0.909	0.118695
630	IFT88_KAN627-2_5.tif:0004-0439	1.147	28.382	0	157	53.693	49.797	0.959	32.541	2526	1.023	0.977	0.947	0.146541
631	IFT88_KAN627-2_5.tif:0005-0459	0.322	7.28	0	39	95.51	52.153	1	2.345	182	1	1	1	0.0105584
632	IFT88_KAN627-2_5.tif:0006-0515	0.502	43.231	0	126	27.914	58.503	0.969	21.719	1686	1.261	0.793	0.963	0.0978102
633	IFT88_KAN627-2_5.tif:0007-0522	0.67	15.981	0	56	11.306	59.238	0.932	10.705	831	1.247	0.802	0.963	0.048209
634	IFT88_KAN627-2_5.tif:0008-0692	0.786	15.934	0	72	106.87	78.614	0.907	12.522	972	1.28	0.781	0.984	0.0563888
635	IFT88_KAN627-2_5.tif:0009-0721	0.915	14.775	0	92	82.901	81.898	0.982	13.513	1049	1.175	0.851	0.947	0.0608558
636	IFT88_KAN627-2_5.tif:0010-0808	1.018	26.051	0	127	127.401	91.677	0.927	26.512	2058	1.392	0.719	0.958	0.119391
637	IFT88_KAN627-2_5.tif:0011-0812	0.876	19.176	0	112	35.283	92.219	0.919	16.798	1304	1.499	0.667	0.986	0.0756492
638	IFT88_KAN627-2_5.tif:0012-1094	0.734	9.772	0	59	107.37	124.17	0.92	7.175	557	1.161	0.861	0.942	0.0323133
639	IFT88_KAN627-2_5.tif:0013-1097	0.528	15.171	0	68	79.797	124.575	0.968	8.013	622	1.176	0.85	0.988	0.0360842
640	IFT88_KAN627-2_5.tif:0014-1179	0.451	22.057	0	90	44.841	133.808	0.991	9.945	772	1.065	0.939	0.986	0.0447862
641	IFT88_KAN627-2_5.tif:0015-1242	0.451	14.429	0	75	141.656	140.959	0.991	6.506	505	1.065	0.939	0.986	0.0292967
										2102.76				0.121988
														0
														0
														0
642	IFT88_KAN627-3_1.tif:0001-0035	0.528	11.122	0	42	133.596	4.038	0.968	5.874	456	1.176	0.85	0.988	0.026454
643	IFT88_KAN627-3_1.tif:0002-0139	0.85	23.242	0	89	6.956	15.806	0.928	19.761	1534	1.156	0.865	0.964	0.0889922
644	IFT88_KAN627-3_1.tif:0003-0177	1.082	34.964	0	269	31.999	20.167	0.985	37.835	2937	1.164	0.859	0.971	0.170385
645	IFT88_KAN627-3_1.tif:0004-0248	0.593	19.609	0	112	61.283	28.192	0.902	11.62	902	1.502	0.666	0.902	0.0523279
646	IFT88_KAN627-3_1.tif:0005-0318	1.366	34.877	0	204	141.664	36.099	0.944	47.626	3697	1.243	0.804	0.951	0.214475
647	IFT88_KAN627-3_1.tif:0006-0409	1.121	22.471	0	127	83.758	46.478	0.938	25.185	1955	1.226	0.815	0.967	0.113416
648	IFT88_KAN627-3_1.tif:0007-0453	0.528	25.976	0	108	120.262	51.422	0.968	13.72	1065	1.176	0.85	0.988	0.0617841
649	IFT88_KAN627-3_1.tif:0008-0461	1.378	37.187	0	225	137.326	52.305	0.896	51.258	3979	1.222	0.818	0.947	0.230835
650	IFT88_KAN627-3_1.tif:0009-0631	0.824	33.344	0	295	47.463	71.665	0.974	27.491	2134	1.217	0.822	0.948	0.1238
651	IFT88_KAN627-3_1.tif:0010-0671	0.966	17.187	0	135	114.204	76.176	0.926	16.605	1289	1.261	0.793	0.968	0.074779
652	IFT88_KAN627-3_1.tif:0011-0717	0.618	18.042	0	92	73.371	81.443	0.96	11.156	866	1.049	0.953	0.99	0.0502394
653	IFT88_KAN627-3_1.tif:0012-0843	0.67	8	0	60	95.51	95.681	0.932	5.359	416	1.25	0.8	0.963	0.0241335
654	IFT88_KAN627-3_1.tif:0013-0893	1.069	30.795	0	160	50.522	101.426	0.908	32.927	2556	1.237	0.809	0.965	0.148282
655	IFT88_KAN627-3_1.tif:0014-1054	0.837	13.169	0	58	136.41	119.689	0.951	11.027	856	1.229	0.814	0.956	0.0496593
656	IFT88_KAN627-3_1.tif:0015-1211	0.618	45.854	0	114	133.412	137.512	0.96	28.354	2201	1.049	0.953	0.99	0.127687
657	IFT88_KAN627-3_2.tif:0001-0005	0.451	234.657	14	621	22.189	0.624	0.938	105.802	8213	1.4	0.714	1	0.476462
658	IFT88_KAN627-3_2.tif:0002-0004	0.129	45.2	0	169	130.582	0.454	0.925	5.823	452	2.5	0.4	1	0.026222
659	IFT88_KAN627-3_2.tif:0003-0041	1.069	34.614	0	98	38.587	4.706	0.974	37.011	2873	1.188	0.842	0.965	0.166672
660	IFT88_KAN627-3_2.tif:0004-0112	0.605	116.745	0	578	87.5	12.706	0.94	70.685	5487	1.336	0.748	0.989	0.318318
661	IFT88_KAN627-3_2.tif:0005-0191	0.863	34.925	0	135	101.18	21.662	0.98	30.144	2340	1.162	0.86	0.971	0.135751
662	IFT88_KAN627-3_2.tif:0006-0225	0.799	18.726	0	95	131.99	25.603	0.944	14.956	1161	1.373	0.729	0.954	0.0673533
663	IFT88_KAN627-3_2.tif:0007-0242	0.605	155.34	0	330	82.458	27.524	0.985	94.053	7301	1.104	0.906	0.979	0.423554
664	IFT88_KAN627-3_2.tif:0008-0351	0.709	32.945	0	116	143.527	39.846	0.943	23.343	1812	1.15	0.87	0.991	0.10512
665	IFT88_KAN627-3_2.tif:0009-0355	0.657	37.275	0	187	24.341	40.3	0.955	24.489	1901	1.279	0.782	0.962	0.110283
666	IFT88_KAN627-3_2.tif:0010-0617	0.824	8.75	0	67	122.674	70.088	0.974	7.214	560	1.184	0.845	0.948	0.0324874
667	IFT88_KAN627-3_2.tif:0011-0682	0.786	33.492	0	245	87.111	77.464	0.945	26.318	2043	1.298	0.77	0.984	0.118521
668	IFT88_KAN627-3_2.tif:0012-0684	1.211	38.936	0	267	115.26	77.622	0.904	47.149	3660	1.374	0.728	0.94	0.212328
669	IFT88_KAN627-3_2.tif:0013-0828	1.005	91.833	0	384	82.155	94.052	0.984	92.276	7163	1.126	0.888	0.94	0.415549
670	IFT88_KAN627-3_2.tif:0014-0839	0.773	16.483	0	61	64.757	95.278	0.929	12.741	989	1.324	0.756	0.976	0.0573751
671	IFT88_KAN627-3_2.tif:0015-0878	0.644	39.62	0	85	139.378	99.71	1	25.52	1981	1.186	0.843	0.943	0.114924
672	IFT88_KAN627-3_2.tif:0016-0911	0.58	56.711	0	315	38.987	103.455	0.859	32.876	2552	1.8	0.556	1	0.14805
673	IFT88_KAN627-3_2.tif:0017-0953	0.812	22.651	0	105	63.206	108.247	0.959	18.383	1427	1.504	0.665	0.955	0.0827848
674	IFT88_KAN627-3_2.tif:0018-1021	0.593	14.63	0	65	8.577	115.948	1	8.67	673	1.052	0.95	0.968	0.0390429
675	IFT88_KAN627-3_2.tif:0019-1119	0.915	57.254	0	304	132.379	127.084	0.982	52.366	4065	1.167	0.857	0.953	0.235824
676	IFT88_KAN627-3_3.tif:0001-0045	1.056	29.037	0	126	31.876	5.164	0.928	30.673	2381	1.382	0.724	0.97	0.138129
677	IFT88_KAN627-3_3.tif:0002-0073	0.644	72.32	0	429	135.179	8.342	0.981	46.582	3616	1.317	0.759	0.962	0.209776
678	IFT88_KAN627-3_3.tif:0003-0075	0.528	21.317	0	82	85.572	8.578	0.968	11.259	874	1.176	0.85	0.988	0.0507035
679	IFT88_KAN627-3_3.tif:0004-0191	0.657	57.196	0	311	138.148	21.742	0.955	37.578	2917	1.171	0.854	0.953	0.169224
680	IFT88_KAN627-3_3.tif:0005-0369	1.301	29.317	0	276	79.029	41.852	0.941	38.144	2961	1.107	0.904	0.971	0.171777
681	IFT88_KAN627-3_3.tif:0006-0405	0.837	18.738	0	91	58.345	46.019	1	15.691	1218	1.146	0.872	0.956	0.0706601
682	IFT88_KAN627-3_3.tif:0007-0436	0.76	17.102	0	120	19.994	49.525	0.936	12.998	1009	1.395	0.717	0.908	0.0585353
683	IFT88_KAN627-3_3.tif:0008-0456	1.031	36.712	0	153	109.34	51.796	0.939	37.835	2937	1.195	0.837	0.958	0.170385
684	IFT88_KAN627-3_3.tif:0009-0615	0.773	17.817	0	140	55.377	69.814	0.969	13.771	1069	1.155	0.866	0.976	0.0620161
685	IFT88_KAN627-3_3.tif:0010-0665	0.631	160.49	0	762	130.241	75.534	0.935	101.306	7864	1	1	1	0.456216
686	IFT88_KAN627-3_3.tif:0011-0722	0.67	41.115	0	174	112.719	82.028	0.974	27.542	2138	1.163	0.86	0.972	0.124032
687	IFT88_KAN627-3_3.tif:0012-0762	0.979	30.395	0	165	36.102	86.5	0.939	29.758	2310	1.236	0.809	0.974	0.13401
688	IFT88_KAN627-3_3.tif:0013-0823	0.747	12	0	99	61.971	93.411	0.977	8.966	696	1.241	0.805	0.967	0.0403772
689	IFT88_KAN627-3_3.tif:0014-0894	1.056	23.573	0	138	98.793	101.479	0.962	24.901	1933	1.252	0.799	0.965	0.11214
690	IFT88_KAN627-3_3.tif:0015-0919	0.876	112.574	0	543	35.784	104.305	0.919	98.614	7655	1.117	0.895	0.971	0.444091
691	IFT88_KAN627-3_3.tif:0016-0981	0.618	47.167	0	177	112.429	111.393	0.96	29.165	2264	1.049	0.953	0.99	0.131342
692	IFT88_KAN627-3_3.tif:0017-1041	0.618	5.938	0	50	83.259	118.203	0.96	3.671	285	1.049	0.953	0.99	0.0165338
693	IFT88_KAN627-3_3.tif:0018-1265	0.528	10	0	48	49.493	143.643	0.968	5.282	410	1.176	0.85	0.988	0.0237854
694	IFT88_KAN627-3_3.tif:0019-1274	0.322	3.88	0	20	139.321	144.656	1	1.25	97	1	1	1	0.00562728
695	IFT88_KAN627-3_4.tif:0001-0125	0.979	29.987	0	158	52.067	14.198	0.959	29.359	2279	1.202	0.832	0.933	0.132212
696	IFT88_KAN627-3_4.tif:0002-0126	0.837	30.908	0	126	128.872	14.284	0.99	25.88	2009	1.136	0.88	0.956	0.116549
697	IFT88_KAN627-3_4.tif:0003-0133	0.837	107.8	0	539	58.469	15.138	0.951	90.266	7007	1.276	0.783	0.956	0.406498
698	IFT88_KAN627-3_4.tif:0004-0246	0.799	55.645	0	182	68.946	27.985	0.922	44.444	3450	1.288	0.776	0.992	0.200146
699	IFT88_KAN627-3_4.tif:0005-0329	0.386	14.667	0	74	99.426	37.398	0.976	5.668	440	1.2	0.833	1	0.0255258
700	IFT88_KAN627-3_4.tif:0006-0342	0.696	45.796	0	167	51.586	38.832	0.967	31.858	2473	1.139	0.878	0.982	0.143467
701	IFT88_KAN627-3_4.tif:0007-0542	0.631	40.245	0	120	49.202	61.574	0.935	25.404	1972	1	1	1	0.114402
702	IFT88_KAN627-3_4.tif:0008-0649	0.773	30.417	0	131	117.94	73.663	0.969	23.51	1825	1.075	0.931	0.968	0.105874
703	IFT88_KAN627-3_4.tif:0009-0748	1.056	21.793	0	100	70.041	84.937	0.928	23.021	1787	1.094	0.914	0.959	0.10367
704	IFT88_KAN627-3_4.tif:0010-0788	0.824	247.484	0	1144	6.583	89.438	0.914	204.042	15839	1	1	1	0.918871
705	IFT88_KAN627-3_4.tif:0011-0813	1.005	452.821	0	3308	20.708	92.326	0.963	455.001	35320	1.032	0.969	0.981	2.04903
706	IFT88_KAN627-3_4.tif:0012-0903	0.67	31.038	0	132	40.079	102.558	0.974	20.792	1614	1.231	0.812	0.972	0.0936333
707	IFT88_KAN627-3_4.tif:0013-0984	0.76	22.695	0	108	36.902	111.691	0.953	17.249	1339	1.102	0.908	0.959	0.0776797
708	IFT88_KAN627-3_4.tif:0014-1005	0.451	15.743	0	75	80.528	114.124	0.938	7.098	551	1.4	0.714	1	0.0319653
709	IFT88_KAN627-3_4.tif:0015-1014	0.747	47.31	0	201	72.401	115.122	0.936	35.349	2744	1.062	0.941	0.959	0.159188
710	IFT88_KAN627-3_4.tif:0016-1094	0.322	92.28	6	197	130.468	124.226	1	29.719	2307	1	1	1	0.133836
711	IFT88_KAN627-3_4.tif:0017-1262	0.618	8.417	0	50	126.829	143.287	0.96	5.204	404	1.049	0.953	0.99	0.0234373
										3021.29				0.175274
														0
														0
														0
712	IFT88_KAN627-4_1.tif:0001-0115	0.322	58.44	0	142	45.797	13.109	1	18.821	1461	1	1	1	0.0847573
713	IFT88_KAN627-4_1.tif:0002-0144	0.953	39.608	0	105	30.243	16.385	0.948	37.758	2931	1.147	0.872	0.955	0.170037
714	IFT88_KAN627-4_1.tif:0003-0185	0.322	30.16	0	81	5.164	21.054	1	9.713	754	1	1	1	0.0437419
715	IFT88_KAN627-4_1.tif:0004-0213	0.386	38.2	0	97	104.363	24.176	0.976	14.763	1146	1.2	0.833	1	0.0664831
716	IFT88_KAN627-4_1.tif:0005-0255	0.618	55.688	0	260	72.817	28.992	0.96	34.434	2673	1.049	0.953	0.99	0.155069
717	IFT88_KAN627-4_1.tif:0006-0599	0.593	24.913	0	101	86.877	68.038	0.964	14.763	1146	1.15	0.87	0.968	0.0664831
718	IFT88_KAN627-4_1.tif:0007-0851	0.58	127.133	0	458	31.723	96.645	0.943	73.699	5721	1.2	0.833	0.957	0.331893
719	IFT88_KAN627-4_1.tif:0008-0962	0.438	84.147	0	324	128.823	109.187	1	36.856	2861	1.141	0.876	0.971	0.165976
720	IFT88_KAN627-4_1.tif:0009-0968	0.451	27.829	0	96	79.799	109.86	0.991	12.547	974	1.065	0.939	0.986	0.0565049
721	IFT88_KAN627-4_1.tif:0010-1065	0.67	31.096	0	122	91.04	120.91	0.974	20.831	1617	1.163	0.86	0.972	0.0938073
722	IFT88_KAN627-4_1.tif:0011-1076	0.631	172.122	5	413	73.945	122.183	0.935	108.649	8434	1	1	1	0.489283
723	IFT88_KAN627-4_1.tif:0012-1099	0.631	141.163	0	546	82.798	124.793	0.935	89.107	6917	1	1	1	0.401277
724	IFT88_KAN627-4_1.tif:0013-1188	0.451	26.371	0	76	124.177	134.83	0.991	11.89	923	1.065	0.939	0.986	0.0535462
725	IFT88_KAN627-4_2.tif:0001-0190	0.322	12.08	0	56	111.287	21.622	1	3.89	302	1	1	1	0.01752
726	IFT88_KAN627-4_2.tif:0002-0202	0.696	50.944	0	166	77.804	22.927	0.967	35.439	2751	1.172	0.853	0.982	0.159594
727	IFT88_KAN627-4_2.tif:0003-0304	0.631	150.408	0	663	3.008	34.561	0.935	94.942	7370	1	1	1	0.427557
728	IFT88_KAN627-4_2.tif:0004-0312	0.322	74.76	22	146	95.624	35.469	1	24.077	1869	1	1	1	0.108427
729	IFT88_KAN627-4_2.tif:0005-0417	0.386	68.333	7	200	11.35	47.386	0.976	26.409	2050	1.2	0.833	1	0.118927
730	IFT88_KAN627-4_2.tif:0006-0421	0.67	88.173	0	280	118.948	47.851	0.974	59.065	4585	1.153	0.867	0.963	0.265991
731	IFT88_KAN627-4_2.tif:0007-0770	0.992	33.805	0	147	68.587	87.472	0.903	33.533	2603	1.33	0.752	0.933	0.151008
732	IFT88_KAN627-4_2.tif:0008-0909	1.366	291.189	0	1501	64.931	103.208	0.927	397.624	30866	1.106	0.904	0.986	1.79064
733	IFT88_KAN627-4_2.tif:0009-1111	0.644	32.4	0	169	89.359	126.076	0.937	20.869	1620	1.311	0.763	0.952	0.0939814
734	IFT88_KAN627-4_2.tif:0010-1136	0.322	41.76	0	74	60.098	128.993	1	13.449	1044	1	1	1	0.0605658
735	IFT88_KAN627-4_2.tif:0011-1161	0.734	45.649	0	164	116.703	131.806	0.92	33.52	2602	1.336	0.749	0.958	0.15095
736	IFT88_KAN627-4_3.tif:0001-0184	0.438	32.529	0	92	68.781	20.884	1	14.248	1106	1.141	0.876	0.971	0.0641626
737	IFT88_KAN627-4_3.tif:0002-0197	0.747	33.897	0	114	107.588	22.36	1	25.327	1966	1.196	0.836	0.951	0.114054
738	IFT88_KAN627-4_3.tif:0003-0228	0.76	19.729	0	87	18.288	25.86	0.953	14.995	1164	1.185	0.844	0.967	0.0675274
739	IFT88_KAN627-4_3.tif:0004-0351	0.902	53.6	0	181	71.52	39.937	0.932	48.334	3752	1.31	0.764	0.966	0.217666
740	IFT88_KAN627-4_3.tif:0005-0461	0.515	57.075	0	222	60.595	52.38	0.994	29.41	2283	1.166	0.857	0.976	0.132444
741	IFT88_KAN627-4_3.tif:0006-0493	0.644	12.14	0	51	119.845	56.024	0.981	7.82	607	1.328	0.753	0.952	0.035214
742	IFT88_KAN627-4_3.tif:0007-0566	0.464	40.833	0	179	7.264	64.241	0.965	18.937	1470	1	1	1	0.0852794
743	IFT88_KAN627-4_3.tif:0008-0733	1.108	59.884	0	293	136.995	83.185	0.96	66.344	5150	1.094	0.914	0.94	0.298768
744	IFT88_KAN627-4_3.tif:0009-1021	0.502	43.077	0	92	51.423	115.934	0.969	21.642	1680	1.261	0.793	0.963	0.0974622
745	IFT88_KAN627-4_4.tif:0001-0041	0.618	83.333	9	160	137.498	4.703	0.96	51.529	4000	1.049	0.953	0.99	0.232053
746	IFT88_KAN627-4_4.tif:0002-0155	0.528	26.61	0	124	89.091	17.658	0.968	14.055	1091	1.176	0.85	0.988	0.0632924
747	IFT88_KAN627-4_4.tif:0003-0283	0.657	39.255	0	209	59.638	32.137	0.955	25.79	2002	1.212	0.825	0.953	0.116142
748	IFT88_KAN627-4_4.tif:0004-0300	0.824	11.547	0	63	135.347	34.082	0.974	9.52	739	1.144	0.874	0.948	0.0428718
749	IFT88_KAN627-4_4.tif:0005-0341	2.306	2294.79	0	15745	81.735	38.68	0.938	5291.62	410768	1.133	0.882	0.973	23.83
750	IFT88_KAN627-4_4.tif:0006-0367	0.683	80.906	0	215	19.529	41.718	0.993	55.239	4288	1.148	0.871	0.972	0.248761
751	IFT88_KAN627-4_4.tif:0007-0423	0.322	14.44	0	72	85.863	48.067	1	4.65	361	1	1	1	0.0209428
752	IFT88_KAN627-4_4.tif:0008-0461	0.464	39.417	0	167	54.594	52.324	0.965	18.28	1419	1	1	1	0.0823207
753	IFT88_KAN627-4_4.tif:0009-0771	0.966	60.387	0	216	28.588	87.49	0.961	58.344	4529	1.244	0.804	0.974	0.262742
754	IFT88_KAN627-4_4.tif:0010-0794	0.631	204.98	62	577	26.956	90.176	0.935	129.389	10044	1	1	1	0.582685
755	IFT88_KAN627-4_4.tif:0011-1041	0.49	73.316	0	190	78.485	118.154	0.944	35.89	2786	1.322	0.756	0.95	0.161625
										12646				0.733636
														0
														0
														0
756	IFT88_KAN627-5_1.tif:0001-0079	0.979	208.237	0	893	78.44	8.958	0.939	203.875	15826	1.282	0.78	0.981	0.918117
757	IFT88_KAN627-5_1.tif:0002-0191	0.721	160.125	0	552	140.343	21.679	0.92	115.515	8967	1.143	0.875	1	0.520204
758	IFT88_KAN627-5_1.tif:0003-0298	0.824	205.312	10	558	13.28	33.823	0.914	169.273	13140	1	1	1	0.762293
759	IFT88_KAN627-5_1.tif:0004-0330	0.876	181.926	0	698	46.21	37.503	0.885	159.366	12371	1.418	0.705	0.986	0.717681
760	IFT88_KAN627-5_1.tif:0005-0449	0.322	131.88	23	285	16.741	51.018	1	42.473	3297	1	1	1	0.19127
761	IFT88_KAN627-5_1.tif:0006-0532	1.172	153.879	0	664	90.841	60.475	0.917	180.39	14003	1.259	0.794	0.968	0.812359
762	IFT88_KAN627-5_1.tif:0007-0693	0.528	151.22	35	300	138.023	78.704	0.968	79.87	6200	1.176	0.85	0.988	0.359682
763	IFT88_KAN627-5_1.tif:0008-0873	1.417	156.045	0	853	31.391	99.06	0.833	221.124	17165	1.693	0.591	0.94	0.995797
764	IFT88_KAN627-5_1.tif:0009-1240	0.631	109.796	13	363	70.478	140.813	0.961	69.307	5380	1.268	0.789	0.933	0.312111
765	IFT88_KAN627-5_2.tif:0001-0187	0.889	179.638	0	517	58.901	21.286	0.933	159.676	12395	1.172	0.853	0.979	0.719074
766	IFT88_KAN627-5_2.tif:0002-0211	0.683	144.868	0	452	28.04	24.025	0.949	98.91	7678	1.162	0.861	0.972	0.445425
767	IFT88_KAN627-5_2.tif:0003-0245	0.631	201.041	0	639	116.281	27.864	0.935	126.903	9851	1	1	1	0.571488
768	IFT88_KAN627-5_2.tif:0004-0398	0.966	142.4	0	511	73.025	45.219	0.926	137.582	10680	1.066	0.938	0.962	0.619581
769	IFT88_KAN627-5_2.tif:0005-0465	1.159	177.111	0	876	125.03	52.868	0.812	205.343	15940	1.358	0.736	0.909	0.92473
770	IFT88_KAN627-5_2.tif:0006-0467	0.451	15.971	0	141	31.221	53.013	0.991	7.201	559	1.065	0.939	0.986	0.0324294
771	IFT88_KAN627-5_2.tif:0007-0580	1.043	150.568	0	768	7.915	65.835	0.886	157.112	12196	1.408	0.71	0.959	0.707529
772	IFT88_KAN627-5_2.tif:0008-0743	0.322	64.36	0	284	15.266	84.387	1	20.728	1609	1	1	1	0.0933432
773	IFT88_KAN627-5_2.tif:0009-0752	1.005	219.821	2	787	57.555	85.352	0.929	220.879	17146	1.249	0.801	0.987	0.994694
774	IFT88_KAN627-5_2.tif:0010-1196	0.824	54.828	0	230	119.594	135.778	0.936	45.204	3509	1.139	0.878	0.948	0.203568
775	IFT88_KAN627-5_3.tif:0001-0064	6.377	684.394	0	2312	25.949	7.212	0.833	4364.19	338775	1.096	0.913	0.918	19.6534
776	IFT88_KAN627-5_3.tif:0002-0254	1.108	153.442	0	659	127.915	28.877	0.94	169.994	13196	1.117	0.895	0.977	0.765542
777	IFT88_KAN627-5_3.tif:0003-0328	1.224	130.253	0	695	54.092	37.202	0.885	159.405	12374	1.43	0.699	0.95	0.717855
778	IFT88_KAN627-5_3.tif:0004-0353	0.721	191.857	0	644	118.551	40.066	0.92	138.407	10744	1.143	0.875	1	0.623294
779	IFT88_KAN627-5_3.tif:0005-0389	0.966	151.387	0	557	5.482	44.216	0.961	146.265	11354	1.114	0.898	0.968	0.658682
780	IFT88_KAN627-5_3.tif:0006-0440	0.631	195.449	0	485	137.846	49.997	0.935	123.373	9577	1	1	1	0.555592
781	IFT88_KAN627-5_3.tif:0007-0489	1.262	99.653	0	415	71.218	55.566	0.873	125.808	9766	1.449	0.69	0.92	0.566557
782	IFT88_KAN627-5_3.tif:0008-0581	0.631	178.429	0	480	114.919	66	0.935	112.63	8743	1	1	1	0.507209
783	IFT88_KAN627-5_3.tif:0009-0585	1.275	102.899	0	594	4.169	66.343	0.805	131.232	10187	1.422	0.703	0.904	0.59098
784	IFT88_KAN627-5_3.tif:0010-0709	1.211	102.883	0	466	94.333	80.496	0.934	124.584	9671	1.114	0.898	0.94	0.561046
785	IFT88_KAN627-5_3.tif:0011-0747	1.056	141.024	0	587	45.457	84.769	0.866	148.97	11564	1.706	0.586	0.988	0.670865
786	IFT88_KAN627-5_3.tif:0012-0876	0.889	125.942	0	722	117.916	99.516	0.822	111.947	8690	1.668	0.6	0.945	0.504135
787	IFT88_KAN627-5_3.tif:0013-0942	0.979	221.539	3	988	123.436	106.968	0.939	216.898	16837	1.155	0.866	0.974	0.976768
788	IFT88_KAN627-5_3.tif:0014-1031	0.631	232.367	0	839	92.105	117.075	0.935	146.677	11386	1	1	1	0.660538
789	IFT88_KAN627-5_3.tif:0015-1194	0.451	31.886	0	95	117.594	135.511	0.991	14.377	1116	1.065	0.939	0.986	0.0647427
790	IFT88_KAN627-5_4.tif:0001-0057	0.58	80.978	0	383	8.683	6.526	0.859	46.943	3644	1.8	0.556	1	0.2114
791	IFT88_KAN627-5_4.tif:0002-0083	1.417	102.682	0	466	27.266	9.475	0.858	145.505	11295	1.459	0.685	0.928	0.655259
792	IFT88_KAN627-5_4.tif:0003-0237	0.902	211.971	1	641	88.019	26.9	0.947	191.147	14838	1.146	0.873	0.986	0.8608
793	IFT88_KAN627-5_4.tif:0004-0319	1.172	124.462	0	529	2.806	36.318	0.796	145.904	11326	1.466	0.682	0.929	0.657057
794	IFT88_KAN627-5_4.tif:0005-0335	0.902	187.714	0	623	120.321	38.079	0.947	169.273	13140	1.125	0.889	0.986	0.762293
795	IFT88_KAN627-5_4.tif:0006-0453	0.631	170	4	444	111.514	51.472	0.935	107.309	8330	1	1	1	0.48325
796	IFT88_KAN627-5_4.tif:0007-0577	0.528	30.512	0	107	32.963	65.496	0.968	16.116	1251	1.176	0.85	0.988	0.0725745
797	IFT88_KAN627-5_4.tif:0008-0580	1.623	119.952	0	770	84.532	65.854	0.813	194.702	15114	1.739	0.575	0.92	0.876811
798	IFT88_KAN627-5_4.tif:0009-0638	0.799	189.419	0	649	66.398	72.413	0.96	151.289	11744	1.081	0.925	0.984	0.681307
799	IFT88_KAN627-5_4.tif:0010-0857	1.159	159.589	0	718	124.826	97.297	0.907	185.028	14363	1.329	0.752	0.968	0.833244
800	IFT88_KAN627-5_4.tif:0011-0877	1.095	122.494	0	427	97.689	99.616	0.857	134.13	10412	1.385	0.722	0.924	0.604033
801	IFT88_KAN627-5_4.tif:0012-0973	0.322	26.24	0	70	53.742	110.492	1	8.451	656	1	1	1	0.0380567
802	IFT88_KAN627-5_4.tif:0013-1178	0.837	159.662	0	603	131.657	133.779	0.951	133.692	10378	1.213	0.824	0.949	0.602061
										16986.9				0.985463
														0
														0
														0
803	IFT88_KAN627-6_1.tif:0001-0022	0.799	158.919	0	590	124.623	2.497	0.96	126.929	9853	1.081	0.925	0.984	0.571604
804	IFT88_KAN627-6_1.tif:0002-0115	1.572	174.123	0	1058	127.974	13.137	0.888	273.658	21243	1.272	0.786	0.931	1.23237
805	IFT88_KAN627-6_1.tif:0003-0128	1.559	112.066	0	539	41.695	14.525	0.801	174.683	13560	1.721	0.581	0.92	0.786659
806	IFT88_KAN627-6_1.tif:0004-0225	1.056	133.317	0	684	98.418	25.6	0.897	140.829	10932	1.248	0.801	0.959	0.6342
807	IFT88_KAN627-6_1.tif:0005-0296	0.386	58.2	1	144	70.086	33.596	0.976	22.492	1746	1.2	0.833	1	0.101291
808	IFT88_KAN627-6_1.tif:0006-0417	1.353	150.714	0	721	113.675	47.358	0.935	203.862	15825	1.026	0.974	0.946	0.918059
809	IFT88_KAN627-6_1.tif:0007-0503	0.657	34.647	0	191	94.313	57.154	1	22.763	1767	1.157	0.864	0.953	0.102509
810	IFT88_KAN627-6_1.tif:0008-0630	0.94	190.973	0	794	45.712	71.546	0.901	179.591	13941	1.304	0.767	0.967	0.808762
811	IFT88_KAN627-6_1.tif:0009-0719	0.902	203.843	0	653	17.888	81.618	0.911	183.817	14269	1.149	0.87	0.986	0.82779
812	IFT88_KAN627-6_1.tif:0010-0752	1.572	150.074	0	921	128.253	85.336	0.888	235.861	18309	1.506	0.664	0.946	1.06216
813	IFT88_KAN627-6_1.tif:0011-0767	0.966	194.373	0	849	94.254	87.134	0.998	187.797	14578	1.114	0.898	0.968	0.845716
814	IFT88_KAN627-6_1.tif:0012-0904	1.314	507.931	0	4463	144.042	102.671	0.95	667.417	51809	1.141	0.877	0.971	3.00561
815	IFT88_KAN627-6_1.tif:0013-0915	1.108	190.907	0	1032	139.861	103.909	0.839	211.501	16418	1.36	0.735	0.93	0.952461
816	IFT88_KAN627-6_1.tif:0014-0985	1.288	186.89	0	968	42.886	111.863	0.932	240.756	18689	1.365	0.733	0.962	1.08421
817	IFT88_KAN627-6_1.tif:0015-1004	1.005	217.795	17	732	86.88	114.005	0.929	218.844	16988	1.093	0.915	0.981	0.985528
818	IFT88_KAN627-6_1.tif:0016-1220	1.494	155.095	0	782	91.858	138.524	0.868	231.765	17991	1.531	0.653	0.924	1.04372
819	IFT88_KAN627-6_1.tif:0017-1247	0.721	201.089	5	639	44.719	141.591	0.92	145.067	11261	1.143	0.875	1	0.653287
820	IFT88_KAN627-6_2.tif:0001-0177	0.902	94.571	0	319	111.54	20.162	0.968	85.281	6620	1.097	0.912	0.94	0.384047
821	IFT88_KAN627-6_2.tif:0002-0191	1.855	164.118	0	1052	55.087	21.698	0.85	304.446	23633	1.638	0.61	0.957	1.37103
822	IFT88_KAN627-6_2.tif:0003-0268	1.005	188.038	0	777	75.869	30.479	0.929	188.944	14667	1.093	0.915	0.981	0.85088
823	IFT88_KAN627-6_2.tif:0004-0281	0.696	53.574	0	119	32.787	31.95	0.967	37.268	2893	1.139	0.878	0.982	0.167832
824	IFT88_KAN627-6_2.tif:0005-0434	0.386	102.067	0	305	7.888	49.259	0.976	39.445	3062	1.2	0.833	1	0.177636
825	IFT88_KAN627-6_2.tif:0006-0494	1.095	146.576	0	644	68.162	56.142	0.744	160.5	12459	1.625	0.615	0.881	0.722786
826	IFT88_KAN627-6_2.tif:0007-0508	1.533	164.513	0	956	121.314	57.63	0.797	252.196	19577	1.352	0.74	0.915	1.13572
827	IFT88_KAN627-6_2.tif:0008-0560	1.185	177.293	0	697	98.762	63.571	0.927	210.122	16311	1.059	0.944	0.963	0.946253
828	IFT88_KAN627-6_2.tif:0009-0668	0.631	180.939	20	453	37.966	75.875	0.935	114.214	8866	1	1	1	0.514345
829	IFT88_KAN627-6_2.tif:0010-0781	1.211	151.83	0	774	139.426	88.64	0.904	183.856	14272	1.398	0.715	0.945	0.827964
830	IFT88_KAN627-6_2.tif:0011-0867	1.61	98.752	0	736	96.828	98.463	0.828	159.019	12344	1.612	0.62	0.916	0.716115
831	IFT88_KAN627-6_2.tif:0012-0932	1.327	138.631	0	697	95.709	105.837	0.906	183.946	14279	1.556	0.643	0.928	0.82837
832	IFT88_KAN627-6_2.tif:0013-1122	1.224	135.326	0	622	99.7	127.321	0.857	165.614	12856	1.477	0.677	0.936	0.745818
833	IFT88_KAN627-6_2.tif:0014-1155	0.902	175.157	0	685	51.472	131.093	0.947	157.949	12261	1.146	0.873	0.986	0.7113
834	IFT88_KAN627-6_2.tif:0015-1172	1.198	176.065	0	772	134.98	133.078	0.924	210.934	16374	1.348	0.742	0.939	0.949908
835	IFT88_KAN627-6_2.tif:0016-1208	0.902	177.043	0	702	43.934	137.152	0.911	159.65	12393	1.132	0.883	0.986	0.718958
836	IFT88_KAN627-6_2.tif:0017-1266	0.515	73.075	0	176	107.612	143.748	0.994	37.655	2923	1.166	0.857	0.976	0.169573
837	IFT88_KAN627-6_3.tif:0001-0020	0.631	186.939	24	505	52.948	2.327	0.935	118.001	9160	1	1	1	0.531401
838	IFT88_KAN627-6_3.tif:0002-0066	1.34	133.077	0	847	85.245	7.507	0.871	178.29	13840	1.511	0.662	0.95	0.802903
839	IFT88_KAN627-6_3.tif:0003-0093	0.721	175.232	0	407	5.335	10.612	0.92	126.414	9813	1.143	0.875	1	0.569283
840	IFT88_KAN627-6_3.tif:0004-0139	0.902	175.529	0	642	138.64	15.765	0.947	158.284	12287	1.125	0.889	0.986	0.712808
841	IFT88_KAN627-6_3.tif:0005-0192	1.713	124.519	0	926	35.015	21.844	0.93	213.343	16561	1.162	0.861	0.95	0.960757
842	IFT88_KAN627-6_3.tif:0006-0372	1.043	181.469	0	878	104.054	42.248	0.886	189.356	14699	1.359	0.736	0.959	0.852736
843	IFT88_KAN627-6_3.tif:0007-0408	0.915	205.394	0	642	23.204	46.314	0.924	187.862	14583	1.13	0.885	0.993	0.846006
844	IFT88_KAN627-6_3.tif:0008-0415	1.533	131.672	0	585	74.185	47.093	0.902	201.852	15669	1.277	0.783	0.964	0.909009
845	IFT88_KAN627-6_3.tif:0009-0421	1.43	130.91	0	519	128.768	47.786	0.891	187.192	14531	1.382	0.724	0.929	0.84299
846	IFT88_KAN627-6_3.tif:0010-0516	1.597	146.71	0	921	73.85	58.562	0.877	234.354	18192	1.441	0.694	0.954	1.05538
847	IFT88_KAN627-6_3.tif:0011-0623	1.069	206.084	0	835	102.204	70.737	0.94	220.351	17105	1.138	0.879	0.96	0.992316
848	IFT88_KAN627-6_3.tif:0012-0663	1.211	185.617	0	1093	81.245	75.322	0.966	224.77	17448	1.187	0.843	0.94	1.01221
849	IFT88_KAN627-6_3.tif:0013-0689	1.172	130.132	0	715	132.284	78.284	0.887	152.552	11842	1.27	0.788	0.958	0.686992
850	IFT88_KAN627-6_3.tif:0014-0759	1.121	192.759	0	848	6.149	86.133	0.907	216.035	16770	1.231	0.812	0.93	0.972881
851	IFT88_KAN627-6_3.tif:0015-0803	1.095	122.918	0	486	22.828	91.203	0.898	134.594	10448	1.381	0.724	0.983	0.606122
852	IFT88_KAN627-6_3.tif:0016-0824	1.597	183.798	0	1108	45.962	93.575	0.821	293.599	22791	1.475	0.678	0.899	1.32218
853	IFT88_KAN627-6_3.tif:0017-0847	1.031	122.537	0	648	66.172	96.21	0.906	126.285	9803	1.26	0.793	0.947	0.568703
854	IFT88_KAN627-6_3.tif:0018-0877	1.082	72.048	0	364	120.928	99.541	0.951	77.963	6052	1.14	0.877	0.966	0.351096
855	IFT88_KAN627-6_3.tif:0019-0924	0.902	197.986	2	780	23.733	104.919	0.911	178.535	13859	1.149	0.87	0.986	0.804005
856	IFT88_KAN627-6_3.tif:0020-0941	0.386	61.4	0	111	95.113	106.86	0.976	23.729	1842	1.2	0.833	1	0.10686
857	IFT88_KAN627-6_3.tif:0021-1049	0.618	142.542	6	462	117.409	119.125	0.96	88.14	6842	1.049	0.953	0.99	0.396926
858	IFT88_KAN627-6_3.tif:0022-1088	0.721	215.964	0	817	27.637	123.488	0.92	155.798	12094	1.143	0.875	1	0.701612
859	IFT88_KAN627-6_3.tif:0023-1099	1.069	136.964	0	434	51.765	124.678	0.836	146.445	11368	1.564	0.639	0.927	0.659494
860	IFT88_KAN627-6_3.tif:0024-1228	0.386	30.867	3	79	116.962	139.378	0.976	11.929	926	1.2	0.833	1	0.0537202
861	IFT88_KAN627-6_3.tif:0025-1253	0.631	169.612	0	451	8.456	142.272	0.935	107.064	8311	1	1	1	0.482148
862	IFT88_KAN627-6_4.tif:0001-0039	0.515	94.075	0	310	109.187	4.483	0.994	48.476	3763	1.209	0.827	0.976	0.218304
863	IFT88_KAN627-6_4.tif:0002-0207	1.739	144.993	0	1135	112.793	23.428	0.739	252.157	19574	1.791	0.558	0.915	1.13555
864	IFT88_KAN627-6_4.tif:0003-0212	0.721	279.643	0	1516	12.201	24.062	0.92	201.736	15660	1.143	0.875	1	0.908487
865	IFT88_KAN627-6_4.tif:0004-0217	0.915	232.761	0	862	32.751	24.624	0.924	212.892	16526	1.13	0.885	0.993	0.958726
866	IFT88_KAN627-6_4.tif:0005-0303	2.138	202.223	0	1215	70.766	34.341	0.795	432.444	33569	1.738	0.575	0.905	1.94744
867	IFT88_KAN627-6_4.tif:0006-0322	0.515	10.975	0	43	136.711	36.547	0.994	5.655	439	1.209	0.827	0.976	0.0254678
868	IFT88_KAN627-6_4.tif:0007-0365	0.657	27.765	0	106	109.362	41.42	0.955	18.241	1416	1.279	0.782	0.962	0.0821467
869	IFT88_KAN627-6_4.tif:0008-0411	1.275	132.485	0	504	12.417	46.597	0.772	168.964	13116	1.515	0.66	0.861	0.760901
870	IFT88_KAN627-6_4.tif:0009-0474	0.58	27.067	0	149	45.659	53.881	0.943	15.691	1218	1.174	0.852	0.957	0.0706601
871	IFT88_KAN627-6_4.tif:0010-0514	1.327	151.66	0	770	123.011	58.306	0.947	201.234	15621	1.333	0.75	0.949	0.906224
872	IFT88_KAN627-6_4.tif:0011-0540	2.01	110.737	0	915	75.286	61.338	0.787	222.541	17275	1.972	0.507	0.984	1.00218
873	IFT88_KAN627-6_4.tif:0012-0588	0.889	131.029	0	585	96.181	66.739	0.884	116.468	9041	1.313	0.762	0.926	0.524497
874	IFT88_KAN627-6_4.tif:0013-0737	0.631	123.347	0	483	106.066	83.706	0.935	77.86	6044	1	1	1	0.350632
875	IFT88_KAN627-6_4.tif:0014-0766	1.095	263.906	0	1446	60.887	86.946	0.962	288.975	22432	1.119	0.894	0.971	1.30135
876	IFT88_KAN627-6_4.tif:0015-0784	0.67	99.615	0	280	134.327	88.971	0.974	66.73	5180	1.176	0.85	0.963	0.300508
877	IFT88_KAN627-6_4.tif:0016-0788	0.889	173.246	0	725	39.719	89.5	0.933	153.994	11954	1.172	0.853	0.979	0.69349
878	IFT88_KAN627-6_4.tif:0017-0991	1.713	87.459	0	648	125.355	112.499	0.765	149.846	11632	1.839	0.544	0.917	0.674809
879	IFT88_KAN627-6_4.tif:0018-1016	0.928	134.208	0	588	137.917	115.31	0.923	124.481	9663	1.374	0.728	0.954	0.560582
880	IFT88_KAN627-6_4.tif:0019-1066	1.082	207.357	0	1060	83.7	121.014	0.985	224.383	17418	1.14	0.877	0.971	1.01047
881	IFT88_KAN627-6_4.tif:0020-1082	0.515	17.625	0	80	88.246	122.807	0.994	9.082	705	1.209	0.827	0.976	0.0408993
882	IFT88_KAN627-6_4.tif:0021-1118	0.902	214.043	0	809	38.828	126.95	0.947	193.015	14983	1.125	0.889	0.986	0.869212
883	IFT88_KAN627-6_4.tif:0022-1123	1.056	65.866	0	234	64.231	127.508	0.962	69.577	5401	1.166	0.858	0.959	0.313329
884	IFT88_KAN627-6_4.tif:0023-1189	0.67	144.846	15	358	2.951	135.008	1	97.029	7532	1.139	0.878	0.963	0.436955
885	IFT88_KAN627-6_4.tif:0024-1211	0.812	185.73	0	525	117.807	137.442	0.937	150.735	11701	1.039	0.963	0.992	0.678812
										12694.8				0.736466
														0
														0
														0
886	IFT88_KAN627-7_1.tif:0001-0008	0.631	131.184	0	388	129.333	0.965	0.935	82.807	6428	1	1	1	0.372909
887	IFT88_KAN627-7_1.tif:0002-0064	1.417	91.3	0	390	16.954	7.247	0.729	129.376	10043	2.094	0.478	0.859	0.582627
888	IFT88_KAN627-7_1.tif:0003-0178	0.721	167.821	0	497	96.021	20.26	0.92	121.067	9398	1.143	0.875	1	0.545208
889	IFT88_KAN627-7_1.tif:0004-0216	1.018	251.835	0	1288	47.273	24.573	0.941	256.292	19895	1.064	0.94	0.988	1.15417
890	IFT88_KAN627-7_1.tif:0005-0242	1.675	111.123	0	816	9.524	27.538	0.885	186.097	14446	1.492	0.67	0.932	0.838059
891	IFT88_KAN627-7_1.tif:0006-0242	0.812	179.413	6	453	107.024	27.461	0.937	145.608	11303	1.039	0.963	0.992	0.655723
892	IFT88_KAN627-7_1.tif:0007-0254	2.087	98.642	0	825	103.43	28.856	0.784	205.858	15980	1.85	0.54	0.918	0.927051
893	IFT88_KAN627-7_1.tif:0008-0303	2.306	116.201	0	943	53.028	34.572	0.838	267.951	20800	1.158	0.864	0.925	1.20667
894	IFT88_KAN627-7_1.tif:0009-0336	1.404	121.743	0	787	0.952	38.162	0.771	170.947	13270	1.652	0.605	0.872	0.769835
895	IFT88_KAN627-7_1.tif:0010-0524	1.585	150.195	0	1061	21.197	59.476	0.683	237.987	18474	1.811	0.552	0.817	1.07174
896	IFT88_KAN627-7_1.tif:0011-0597	1.739	499.837	0	3308	128.272	67.826	0.971	869.269	67478	1.189	0.841	0.961	3.91461
897	IFT88_KAN627-7_1.tif:0012-0637	2.113	135.774	0	764	128.284	72.37	0.712	286.849	22267	1.885	0.53	0.845	1.29178
898	IFT88_KAN627-7_1.tif:0013-0669	1.237	186.406	0	672	74.067	75.937	0.954	230.528	17895	1.233	0.811	0.937	1.03815
899	IFT88_KAN627-7_1.tif:0014-0696	0.721	197.554	0	674	41.995	79.053	0.92	142.516	11063	1.143	0.875	1	0.6418
900	IFT88_KAN627-7_1.tif:0015-0706	1.224	189.232	0	868	15.256	80.196	0.897	231.584	17977	1.261	0.793	0.979	1.0429
901	IFT88_KAN627-7_1.tif:0016-0716	0.18	100	0	309	144.826	81.323	0.718	18.035	1400	3.5	0.286	1	0.0812185
902	IFT88_KAN627-7_1.tif:0017-0744	0.889	161.826	0	652	16.792	84.506	0.933	143.843	11166	1.172	0.853	0.979	0.647775
903	IFT88_KAN627-7_1.tif:0018-1077	1.211	147.564	0	631	26.474	122.253	0.848	178.69	13871	1.657	0.603	0.949	0.804701
904	IFT88_KAN627-7_1.tif:0019-1223	0.721	168.964	0	571	59.361	138.867	0.92	121.892	9462	1.143	0.875	1	0.548921
905	IFT88_KAN627-7_1.tif:0020-1236	1.159	147.122	0	780	129.472	140.291	0.812	170.574	13241	1.465	0.683	0.9	0.768153
906	IFT88_KAN627-7_2.tif:0001-0039	0.979	27.763	0	134	61.447	4.441	0.924	27.182	2110	1.313	0.762	0.933	0.122408
907	IFT88_KAN627-7_2.tif:0002-0078	1.082	107.655	0	520	27.256	8.846	0.906	116.494	9043	1.344	0.744	0.928	0.524613
908	IFT88_KAN627-7_2.tif:0003-0087	1.147	130.831	0	637	18.094	9.908	0.885	150.001	11644	1.454	0.688	0.918	0.675506
909	IFT88_KAN627-7_2.tif:0004-0286	0.631	146.347	0	675	13.904	32.518	0.935	92.379	7171	1	1	1	0.416013
910	IFT88_KAN627-7_2.tif:0005-0327	0.322	114.12	4	333	107.541	37.171	1	36.753	2853	1	1	1	0.165512
911	IFT88_KAN627-7_2.tif:0006-0330	0.837	26.031	0	172	58.401	37.431	0.951	21.797	1692	1.137	0.88	0.956	0.0981583
912	IFT88_KAN627-7_2.tif:0007-0392	0.386	98.533	0	410	30.021	44.492	0.976	38.08	2956	1.2	0.833	1	0.171487
913	IFT88_KAN627-7_2.tif:0008-0410	1.958	168.842	0	1203	105.02	46.536	0.681	330.61	25664	2.319	0.431	0.866	1.48885
914	IFT88_KAN627-7_2.tif:0009-0509	0.322	187.84	0	564	134.554	57.828	1	60.495	4696	1	1	1	0.27243
915	IFT88_KAN627-7_2.tif:0010-0556	1.25	143.866	0	673	85.172	63.136	0.789	179.772	13955	1.464	0.683	0.894	0.809574
916	IFT88_KAN627-7_2.tif:0011-0671	1.378	497.729	0	4051	58.683	76.21	0.908	686.07	53257	1.118	0.894	0.986	3.08961
917	IFT88_KAN627-7_2.tif:0012-0896	1.597	162.661	0	1001	133.69	101.738	0.867	259.835	20170	1.343	0.744	0.908	1.17013
918	IFT88_KAN627-7_2.tif:0013-0899	0.928	163.764	0	676	11.894	102.071	0.923	151.895	11791	1.337	0.748	0.96	0.684034
919	IFT88_KAN627-7_2.tif:0014-0982	1.147	125.146	0	630	49.896	111.507	0.897	143.483	11138	1.237	0.809	0.947	0.646151
920	IFT88_KAN627-7_2.tif:0015-0985	1.056	143.195	0	737	31.469	111.858	0.764	151.263	11742	1.678	0.596	0.863	0.681191
921	IFT88_KAN627-7_2.tif:0016-1077	0.799	185.758	0	491	84.041	122.304	0.922	148.365	11517	1.288	0.776	0.992	0.668138
922	IFT88_KAN627-7_2.tif:0017-1235	0.451	44.086	0	352	139.5	140.181	0.991	19.877	1543	1.065	0.939	0.986	0.0895144
923	IFT88_KAN627-7_3.tif:0001-0017	0.631	162.429	15	432	23.892	1.986	0.935	102.53	7959	1	1	1	0.461727
924	IFT88_KAN627-7_3.tif:0002-0169	0.799	165.452	0	805	77.975	19.182	0.96	132.146	10258	1.081	0.925	0.984	0.595099
925	IFT88_KAN627-7_3.tif:0003-0190	0.631	160.612	19	503	122.75	21.622	0.935	101.383	7870	1	1	1	0.456564
926	IFT88_KAN627-7_3.tif:0004-0351	0.966	123.053	0	501	104.275	39.898	0.809	118.89	9229	1.732	0.577	0.882	0.535404
927	IFT88_KAN627-7_3.tif:0005-0362	0.721	189.839	0	563	138.016	41.144	0.92	136.951	10631	1.143	0.875	1	0.616738
928	IFT88_KAN627-7_3.tif:0006-0431	1.095	350	0	2428	72.918	48.923	0.962	383.247	29750	1.119	0.894	0.971	1.72589
929	IFT88_KAN627-7_3.tif:0007-0540	0.631	209.694	2	570	95.51	61.347	0.935	132.365	10275	1	1	1	0.596086
930	IFT88_KAN627-7_3.tif:0008-0609	1.095	205.694	0	756	110.09	69.173	0.962	225.233	17484	1.119	0.894	0.971	1.0143
931	IFT88_KAN627-7_3.tif:0009-0635	1.456	135.85	0	621	142.696	72.175	0.832	197.755	15351	1.622	0.617	0.95	0.890561
932	IFT88_KAN627-7_3.tif:0010-0738	1.224	151.284	0	608	51.562	83.85	0.772	185.144	14372	1.532	0.653	0.896	0.833766
933	IFT88_KAN627-7_3.tif:0011-0874	1.198	131.677	0	510	86.451	99.161	0.705	157.756	12246	1.718	0.582	0.827	0.71043
934	IFT88_KAN627-7_3.tif:0012-0884	0.992	192.468	0	778	134.554	100.38	0.951	190.915	14820	1.06	0.944	0.975	0.859756
935	IFT88_KAN627-7_3.tif:0013-1240	1.559	382.81	0	2234	77.922	140.744	0.944	596.706	46320	1.319	0.758	0.972	2.68717
936	IFT88_KAN627-7_4.tif:0001-0071	1.018	114.81	0	462	16.009	8.117	0.835	116.842	9070	1.546	0.647	0.946	0.52618
937	IFT88_KAN627-7_4.tif:0002-0134	0.271	98.476	0	322	144.769	15.266	0.846	26.64	2068	2.333	0.429	1	0.119971
938	IFT88_KAN627-7_4.tif:0003-0201	0.812	185.603	0	661	11.81	22.82	0.937	150.632	11693	1.039	0.963	0.992	0.678348
939	IFT88_KAN627-7_4.tif:0004-0228	1.572	144.09	0	714	10.44	25.863	0.695	226.457	17579	1.944	0.514	0.836	1.01981
940	IFT88_KAN627-7_4.tif:0005-0228	0.812	192.889	0	725	60.161	25.872	0.937	156.545	12152	1.039	0.963	0.992	0.704976
941	IFT88_KAN627-7_4.tif:0006-0373	1.198	161.43	0	830	95.737	42.312	0.839	193.401	15013	1.526	0.655	0.925	0.870952
942	IFT88_KAN627-7_4.tif:0007-0375	1.069	225.145	0	990	39.901	42.591	0.974	240.731	18687	1.108	0.903	0.971	1.08409
943	IFT88_KAN627-7_4.tif:0008-0541	0.631	179.306	2	610	4.71	61.46	0.935	113.183	8786	1	1	1	0.509704
944	IFT88_KAN627-7_4.tif:0009-0583	0.812	202	0	642	106.015	66.177	0.937	163.94	12726	1.039	0.963	0.992	0.738276
945	IFT88_KAN627-7_4.tif:0010-0661	0.902	155.971	0	678	133.805	75.092	0.911	140.648	10918	1.149	0.87	0.986	0.633388
946	IFT88_KAN627-7_4.tif:0011-0673	1.224	148.295	0	689	36.789	76.367	0.914	181.485	14088	1.155	0.865	0.931	0.81729
947	IFT88_KAN627-7_4.tif:0012-0726	0.812	154.016	0	648	130.63	82.436	0.886	124.996	9703	1.32	0.757	0.933	0.562902
948	IFT88_KAN627-7_4.tif:0013-0761	2.409	519.893	0	2864	99.667	86.433	0.926	1252.41	97220	1.26	0.794	0.966	5.64004
949	IFT88_KAN627-7_4.tif:0014-0867	0.515	86.3	0	222	54.423	98.405	0.994	44.47	3452	1.209	0.827	0.976	0.200262
950	IFT88_KAN627-7_4.tif:0015-0917	1.456	150.982	0	790	16.952	104.132	0.809	219.784	17061	1.666	0.6	0.946	0.989763
951	IFT88_KAN627-7_4.tif:0016-1061	0.631	195.041	0	963	1.646	120.48	0.935	123.116	9557	1	1	1	0.554432
952	IFT88_KAN627-7_4.tif:0017-1088	0.631	162.735	4	482	135.803	123.545	0.935	102.723	7974	1	1	1	0.462597
953	IFT88_KAN627-7_4.tif:0018-1222	0.322	7.28	0	36	85.182	138.754	1	2.345	182	1	1	1	0.0105584
										14901.4				0.864476
														0
														0
														0
954	IFT88_KAN627-8_1.tif:0001-0043	0.322	6.8	0	27	84.728	4.937	1	2.19	170	1	1	1	0.00986224
955	IFT88_KAN627-8_1.tif:0002-0053	0.837	99.123	0	270	16.916	6.076	0.951	83	6443	1.133	0.882	0.949	0.373779
956	IFT88_KAN627-8_1.tif:0003-0101	0.631	43.49	0	177	64.235	11.536	0.961	27.452	2131	1.268	0.789	0.933	0.123626
957	IFT88_KAN627-8_1.tif:0004-0181	0.631	179.612	23	331	98.461	20.6	0.935	113.377	8801	1	1	1	0.510574
958	IFT88_KAN627-8_1.tif:0005-0192	0.979	140.132	0	528	96.099	21.788	0.861	137.196	10650	1.536	0.651	0.927	0.617841
959	IFT88_KAN627-8_1.tif:0006-0264	0.696	101.093	0	463	22.54	29.949	0.926	70.324	5459	1.152	0.868	0.982	0.316694
960	IFT88_KAN627-8_1.tif:0007-0510	0.928	135.792	0	576	84.455	57.88	0.889	125.95	9777	1.365	0.732	0.947	0.567195
961	IFT88_KAN627-8_1.tif:0008-0669	1.005	103.808	0	382	103.658	75.898	0.824	104.308	8097	1.793	0.558	0.969	0.469733
962	IFT88_KAN627-8_1.tif:0009-0727	0.631	164.388	5	461	58.85	82.571	0.935	103.767	8055	1	1	1	0.467296
963	IFT88_KAN627-8_1.tif:0010-0739	1.005	238.205	0	935	127.284	83.927	0.963	239.352	18580	1.032	0.969	0.981	1.07789
964	IFT88_KAN627-8_1.tif:0011-0776	1.056	136.195	0	494	138.571	88.084	0.764	143.869	11168	1.604	0.623	0.868	0.647891
965	IFT88_KAN627-8_1.tif:0012-0863	0.966	203.507	0	927	11.233	97.932	0.926	196.622	15263	1.244	0.804	0.968	0.885455
966	IFT88_KAN627-8_1.tif:0013-0883	0.902	210.086	0	744	130.071	100.277	0.947	189.446	14706	1.146	0.873	0.986	0.853142
967	IFT88_KAN627-8_1.tif:0014-0982	0.889	127.522	0	434	62.108	111.468	0.822	113.351	8799	1.668	0.6	0.945	0.510458
968	IFT88_KAN627-8_1.tif:0015-1090	0.876	91.721	0	376	100.379	123.725	0.956	80.347	6237	1.189	0.841	0.978	0.361828
969	IFT88_KAN627-8_1.tif:0016-1209	0.631	159.102	3	501	8.91	137.278	0.935	100.43	7796	1	1	1	0.452271
970	IFT88_KAN627-8_1.tif:0017-1230	0.67	58.019	0	215	115.589	139.605	0.974	38.866	3017	1.153	0.867	0.963	0.175026
971	IFT88_KAN627-8_2.tif:0001-0030	0.773	55.233	0	175	123.673	3.441	0.929	42.692	3314	1.305	0.766	0.984	0.192256
972	IFT88_KAN627-8_2.tif:0002-0113	0.631	89.143	0	207	74.286	12.882	0.935	56.27	4368	1	1	1	0.253402
973	IFT88_KAN627-8_2.tif:0003-0130	1.327	108.748	0	643	85.794	14.822	0.863	144.294	11201	1.498	0.668	0.945	0.649806
974	IFT88_KAN627-8_2.tif:0004-0143	0.386	94.533	0	419	13.28	16.287	0.976	36.534	2836	1.2	0.833	1	0.164525
975	IFT88_KAN627-8_2.tif:0005-0210	1.031	122.162	0	515	33.802	23.931	0.906	125.898	9773	1.25	0.8	0.941	0.566963
976	IFT88_KAN627-8_2.tif:0006-0360	1.043	157.494	0	735	86.901	40.807	0.765	164.339	12757	1.653	0.605	0.915	0.740074
977	IFT88_KAN627-8_2.tif:0007-0376	1.018	129.899	0	556	140.173	42.644	0.823	132.198	10262	1.455	0.687	0.883	0.595331
978	IFT88_KAN627-8_2.tif:0008-0382	0.322	28.96	0	93	50.224	43.414	1	9.327	724	1	1	1	0.0420016
979	IFT88_KAN627-8_2.tif:0009-0467	0.799	267	0	1622	76.159	53.005	0.96	213.253	16554	1.081	0.925	0.984	0.96035
980	IFT88_KAN627-8_2.tif:0010-0499	0.812	194.317	0	577	5.896	56.643	0.937	157.705	12242	1.039	0.963	0.992	0.710198
981	IFT88_KAN627-8_2.tif:0011-0520	0.451	70.314	0	154	106.244	59.012	0.991	31.703	2461	1.065	0.939	0.986	0.14277
982	IFT88_KAN627-8_2.tif:0012-0532	0.631	189.51	0	660	49.543	60.439	0.935	119.625	9286	1	1	1	0.538711
983	IFT88_KAN627-8_2.tif:0013-0755	1.559	225.81	0	1520	57.075	85.707	0.78	351.982	27323	1.518	0.659	0.89	1.58509
984	IFT88_KAN627-8_2.tif:0014-0791	0.915	198.535	0	653	89.205	89.842	0.924	181.588	14096	1.13	0.885	0.993	0.817754
985	IFT88_KAN627-8_2.tif:0015-0925	1.095	155.565	0	613	21.727	104.976	0.857	170.342	13223	1.539	0.65	0.95	0.767108
986	IFT88_KAN627-8_2.tif:0016-1017	0.837	77.846	0	445	113.265	115.467	0.951	65.184	5060	1.176	0.85	0.956	0.293547
987	IFT88_KAN627-8_2.tif:0017-1100	1.301	153.525	0	779	69.383	124.864	0.857	199.752	15506	1.423	0.703	0.967	0.899553
988	IFT88_KAN627-8_2.tif:0018-1162	1.043	130.062	0	686	91.986	131.941	0.844	135.715	10535	1.59	0.629	0.915	0.611169
989	IFT88_KAN627-8_2.tif:0019-1178	0.812	158.651	0	564	47.664	133.697	0.937	128.758	9995	1.039	0.963	0.992	0.579842
990	IFT88_KAN627-8_3.tif:0001-0077	0.631	176.714	5	445	121.729	8.796	0.935	111.547	8659	1	1	1	0.502336
991	IFT88_KAN627-8_3.tif:0002-0160	0.631	157.796	0	507	86.998	18.217	0.935	99.606	7732	1	1	1	0.448558
992	IFT88_KAN627-8_3.tif:0003-0194	1.069	171.952	0	693	36.705	22.001	0.908	183.856	14272	1.109	0.902	0.96	0.827964
993	IFT88_KAN627-8_3.tif:0004-0332	0.915	111.606	0	383	129.715	37.736	0.715	102.079	7924	1.794	0.557	0.835	0.459697
994	IFT88_KAN627-8_3.tif:0005-0365	1.095	150.482	0	698	58.73	41.431	0.898	164.777	12791	1.375	0.727	0.983	0.742047
995	IFT88_KAN627-8_3.tif:0006-0365	0.322	39.8	0	86	80.301	41.484	1	12.818	995	1	1	1	0.0577231
996	IFT88_KAN627-8_3.tif:0007-0456	0.631	137.102	0	405	103.001	51.813	0.935	86.543	6718	1	1	1	0.389733
997	IFT88_KAN627-8_3.tif:0008-0463	1.147	112.73	0	518	120.276	52.554	0.915	129.248	10033	1.467	0.682	0.922	0.582046
998	IFT88_KAN627-8_3.tif:0009-0515	0.528	62.415	0	270	4.887	58.518	0.968	32.966	2559	1.176	0.85	0.988	0.148456
999	IFT88_KAN627-8_3.tif:0010-0762	1.031	111.438	0	610	132.33	86.49	0.875	114.845	8915	1.389	0.72	0.952	0.517188
1000	IFT88_KAN627-8_3.tif:0011-0774	1.237	134.125	0	606	5.638	87.87	0.866	165.872	12876	1.284	0.779	0.932	0.746978
1001	IFT88_KAN627-8_3.tif:0012-0776	0.451	125.429	12	319	97.618	88.068	0.991	56.553	4390	1.065	0.939	0.986	0.254678
1002	IFT88_KAN627-8_3.tif:0013-0889	1.043	57.432	0	365	75.317	100.899	0.917	59.928	4652	1.164	0.859	0.947	0.269877
1003	IFT88_KAN627-8_3.tif:0014-0900	0.721	191.393	4	717	23.608	102.207	0.92	138.072	10718	1.143	0.875	1	0.621785
1004	IFT88_KAN627-8_3.tif:0015-1000	0.889	193.13	0	545	79.852	113.494	0.933	171.669	13326	1.172	0.853	0.979	0.773084
1005	IFT88_KAN627-8_3.tif:0016-1044	1.121	125.655	0	617	67.798	118.535	0.848	140.829	10932	1.426	0.701	0.935	0.6342
1006	IFT88_KAN627-8_3.tif:0017-1081	0.799	146.806	0	569	93.297	122.694	0.96	117.254	9102	1.081	0.925	0.984	0.528036
1007	IFT88_KAN627-8_4.tif:0001-0007	0.953	54.662	0	353	130.655	0.894	0.934	52.109	4045	1.274	0.785	0.925	0.234663
1008	IFT88_KAN627-8_4.tif:0002-0017	0.541	175.071	24	354	74.116	1.986	0.943	94.723	7353	1.167	0.857	1	0.426571
1009	IFT88_KAN627-8_4.tif:0003-0176	0.631	159.755	0	453	19.125	20.033	0.935	100.842	7828	1	1	1	0.454127
1010	IFT88_KAN627-8_4.tif:0004-0180	0.902	201.443	0	793	16.582	20.475	0.911	181.653	14101	1.149	0.87	0.986	0.818044
1011	IFT88_KAN627-8_4.tif:0005-0260	0.515	75.55	0	209	41.555	29.553	0.944	38.93	3022	1.215	0.823	0.976	0.175316
1012	IFT88_KAN627-8_4.tif:0006-0286	0.631	210.388	18	573	126.155	32.518	0.935	132.803	10309	1	1	1	0.598058
1013	IFT88_KAN627-8_4.tif:0007-0394	1.636	91.882	0	632	102.872	44.739	0.899	150.323	11669	1.204	0.831	0.944	0.676956
1014	IFT88_KAN627-8_4.tif:0008-0406	0.438	42.588	0	232	38.817	46.081	1	18.654	1448	1.141	0.876	0.971	0.0840031
1015	IFT88_KAN627-8_4.tif:0009-0611	1.597	158.21	0	938	87.707	69.334	0.877	252.724	19618	1.269	0.788	0.936	1.1381
1016	IFT88_KAN627-8_4.tif:0010-0661	0.721	204.054	0	1077	69.859	75.024	0.92	147.205	11427	1.143	0.875	1	0.662917
1017	IFT88_KAN627-8_4.tif:0011-0686	0.799	179.403	0	717	23.381	77.861	0.96	143.289	11123	1.081	0.925	0.984	0.645281
1018	IFT88_KAN627-8_4.tif:0012-0717	1.134	175.023	0	726	36.909	81.47	0.887	198.412	15402	1.3	0.769	0.941	0.893519
1019	IFT88_KAN627-8_4.tif:0013-0737	0.593	98.522	0	238	113.776	83.699	1	58.382	4532	1.052	0.95	0.968	0.262916
1020	IFT88_KAN627-8_4.tif:0014-0780	1.314	136.775	0	695	85.325	88.494	0.855	179.72	13951	1.366	0.732	0.919	0.809342
1021	IFT88_KAN627-8_4.tif:0015-0817	1.211	186.277	0	978	13.341	92.713	0.904	225.568	17510	1.451	0.689	0.945	1.01581
1022	IFT88_KAN627-8_4.tif:0016-0854	1.314	100.99	0	569	124.716	96.897	0.855	132.7	10301	1.442	0.693	0.932	0.597594
1023	IFT88_KAN627-8_4.tif:0017-0889	1.095	221.941	0	837	34.669	100.905	0.898	243.024	18865	1.194	0.837	0.971	1.09442
1024	IFT88_KAN627-8_4.tif:0018-0911	0.953	143.311	0	500	54.966	103.426	0.881	136.616	10605	1.318	0.759	0.961	0.61523
1025	IFT88_KAN627-8_4.tif:0019-1029	1.147	94	0	430	44.713	116.85	0.856	107.773	8366	1.534	0.652	0.918	0.485338
1026	IFT88_KAN627-8_4.tif:0020-1083	0.786	157.82	0	600	135.926	122.962	0.907	124.017	9627	1.28	0.781	0.984	0.558493
1027	IFT88_KAN627-8_4.tif:0021-1255	0.322	78.4	0	409	16.287	142.499	1	25.249	1960	1	1	1	0.113706
1028	IFT88_KAN627-8_5.tif:0001-0045	0.824	180.688	0	548	129.163	5.108	0.914	148.97	11564	1	1	1	0.670865
1029	IFT88_KAN627-8_5.tif:0002-0119	1.043	145.185	0	416	53.365	13.523	0.886	151.495	11760	1.4	0.714	0.959	0.682235
1030	IFT88_KAN627-8_5.tif:0003-0142	1.237	162.438	0	617	89.3	16.128	0.866	200.886	15594	1.281	0.781	0.932	0.904658
1031	IFT88_KAN627-8_5.tif:0004-0247	0.94	174.192	0	388	143.861	28.091	0.936	163.811	12716	1.25	0.8	0.948	0.737696
1032	IFT88_KAN627-8_5.tif:0005-0355	0.618	228.167	12	752	0.681	40.293	0.916	141.086	10952	1.333	0.75	1	0.635361
1033	IFT88_KAN627-8_5.tif:0006-0435	0.631	189.163	0	771	138.867	49.429	0.935	119.406	9269	1	1	1	0.537724
1034	IFT88_KAN627-8_5.tif:0007-0452	1.301	172.426	0	839	107.448	51.31	0.872	224.344	17415	1.233	0.811	0.931	1.0103
1035	IFT88_KAN627-8_5.tif:0008-0490	0.876	179.426	0	746	75.488	55.685	0.956	157.176	12201	1.113	0.899	0.971	0.707819
1036	IFT88_KAN627-8_5.tif:0009-0654	0.812	191.587	0	536	132.801	74.223	0.937	155.489	12070	1.039	0.963	0.992	0.700219
1037	IFT88_KAN627-8_5.tif:0010-0749	1.108	248.081	0	997	80.585	85.059	0.94	274.843	21335	1.117	0.895	0.977	1.23771
1038	IFT88_KAN627-8_5.tif:0011-0769	1.301	231.99	0	833	5.29	87.279	0.941	301.844	23431	1.107	0.903	0.962	1.35931
1039	IFT88_KAN627-8_5.tif:0012-0781	1.25	170.32	0	889	69.494	88.638	0.997	212.828	16521	1.112	0.899	0.946	0.958436
1040	IFT88_KAN627-8_5.tif:0013-0787	0.386	85.833	0	289	28.943	89.381	0.976	33.172	2575	1.2	0.833	1	0.149384
1041	IFT88_KAN627-8_5.tif:0014-0858	1.262	125.061	0	717	143.367	97.377	0.873	157.885	12256	1.424	0.702	0.912	0.71101
1042	IFT88_KAN627-8_5.tif:0015-0962	0.593	12.261	0	91	31.565	109.172	0.92	7.266	564	1.363	0.734	0.979	0.0327194
1043	IFT88_KAN627-8_5.tif:0016-0984	1.043	148.667	0	818	69.408	111.7	0.95	155.128	12042	1.143	0.875	0.947	0.698595
1044	IFT88_KAN627-8_5.tif:0017-1079	0.992	195.571	0	815	115.6	122.534	0.951	193.994	15059	1.06	0.944	0.975	0.873621
1045	IFT88_KAN627-8_5.tif:0018-1160	0.322	31.24	0	82	11.52	131.717	1	10.061	781	1	1	1	0.0453083
										9939.41				0.576617
														0
														0
														0
1046	IFT88_KAN627-9_1.tif:0001-0430	0.322	16.04	0	57	90.289	48.862	1	5.166	401	1	1	1	0.0232633
1047	IFT88_KAN627-9_1.tif:0002-0640	0.438	28.147	0	119	95.34	72.64	1	12.328	957	1.141	0.876	0.971	0.0555186
1048	IFT88_KAN627-9_1.tif:0003-0948	0.709	23.182	0	82	40.494	107.613	0.852	16.425	1275	1.745	0.573	0.957	0.0739668
1049	IFT88_KAN627-9_1.tif:0004-0949	0.386	17.367	0	70	108.903	107.712	0.976	6.712	521	1.2	0.833	1	0.0302249
1050	IFT88_KAN627-9_2.tif:0001-0450	0.386	5.4	0	27	67.419	51.132	0.976	2.087	162	1.2	0.833	1	0.00939814
1051	IFT88_KAN627-9_2.tif:0002-0667	0.322	25.84	0	54	131.263	75.761	1	8.322	646	1	1	1	0.0374765
1052	IFT88_KAN627-9_2.tif:0003-0673	0.799	227.919	0	813	118.835	76.386	0.96	182.039	14131	1.081	0.925	0.984	0.819784
1053	IFT88_KAN627-9_2.tif:0004-0857	0.386	44.733	0	103	78.599	97.27	0.976	17.288	1342	1.2	0.833	1	0.0778537
1054	IFT88_KAN627-9_2.tif:0005-1007	0.451	28.8	0	104	22.692	114.286	0.991	12.985	1008	1.065	0.939	0.986	0.0584773
1055	IFT88_KAN627-9_3.tif:0001-0238	0.386	11	0	59	37.455	27.07	0.976	4.251	330	1.2	0.833	1	0.0191444
1056	IFT88_KAN627-9_3.tif:0002-0364	0.528	35.61	0	108	108.272	41.379	0.968	18.808	1460	1.176	0.85	0.988	0.0846993
1057	IFT88_KAN627-9_3.tif:0003-0489	0.386	8.967	0	53	48.124	55.558	0.976	3.465	269	1.2	0.833	1	0.0156055
1058	IFT88_KAN627-9_3.tif:0004-0605	0.863	32.403	0	141	114.941	68.67	0.927	27.967	2171	1.383	0.723	0.924	0.125947
1059	IFT88_KAN627-9_3.tif:0005-0783	0.541	16.167	0	70	92.843	88.927	0.943	8.747	679	1.167	0.857	1	0.039391
1060	IFT88_KAN627-9_4.tif:0001-0205	0.322	31.96	0	79	106.066	23.324	1	10.293	799	1	1	1	0.0463525
1061	IFT88_KAN627-9_4.tif:0002-0328	0.696	22.204	0	111	106.633	37.243	0.967	15.446	1199	1.139	0.878	0.982	0.0695578
1062	IFT88_KAN627-9_4.tif:0003-0674	0.464	19.194	0	62	88.644	76.499	0.965	8.902	691	1	1	1	0.0400871
1063	IFT88_KAN627-9_4.tif:0004-0869	0.438	11.118	0	46	119.175	98.632	1	4.869	378	1.141	0.876	0.971	0.021929
1064	IFT88_KAN627-9_4.tif:0005-0907	1.327	249.097	0	1267	55.732	102.987	0.93	330.52	25657	1.16	0.862	0.972	1.48844
										2846.11				0.165112
														0
														0
														0
1	IFT88_KAN627-10_1.tif:0001-0013	0.812	199.016	0	469	2.718	1.469	0.937	161.518	12538	1.039	0.963	0.992	0.727369
2	IFT88_KAN627-10_1.tif:0002-0122	1.34	174.615	0	1039	74.393	13.947	0.927	233.942	18160	1.188	0.842	0.954	1.05352
3	IFT88_KAN627-10_1.tif:0003-0140	1.649	229.352	0	931	72.454	15.88	0.895	378.184	29357	1.499	0.667	0.952	1.70309
4	IFT88_KAN627-10_1.tif:0004-0190	1.134	237.739	0	1197	102.828	21.584	0.917	269.51	20921	1.264	0.791	0.951	1.21369
5	IFT88_KAN627-10_1.tif:0005-0197	1.301	107	0	496	91.667	22.387	0.846	139.218	10807	1.561	0.641	0.935	0.626949
6	IFT88_KAN627-10_1.tif:0006-0217	0.631	200.653	5	600	101.639	24.686	0.935	126.658	9832	1	1	1	0.570386
7	IFT88_KAN627-10_1.tif:0007-0249	1.237	90.271	0	457	101.484	28.254	0.758	111.638	8666	1.98	0.505	0.923	0.502742
8	IFT88_KAN627-10_1.tif:0008-0264	1.031	303.4	0	1564	83.598	30.026	0.919	312.678	24272	1.031	0.97	0.994	1.4081
9	IFT88_KAN627-10_1.tif:0009-0283	1.507	97.47	0	414	44.433	32.144	0.805	146.909	11404	1.574	0.635	0.911	0.661582
10	IFT88_KAN627-10_1.tif:0010-0353	1.34	154.75	0	960	59.379	40.133	0.835	207.327	16094	1.56	0.641	0.904	0.933664
11	IFT88_KAN627-10_1.tif:0011-0366	0.721	196.286	0	625	88.133	41.541	0.92	141.602	10992	1.143	0.875	1	0.637681
12	IFT88_KAN627-10_1.tif:0012-0369	0.631	215.327	0	602	58.963	41.938	0.935	135.921	10551	1	1	1	0.612097
13	IFT88_KAN627-10_1.tif:0013-0379	0.631	184.265	0	518	111.627	43.073	0.935	116.314	9029	1	1	1	0.523801
14	IFT88_KAN627-10_1.tif:0014-0503	1.958	171.75	0	1277	72.306	57.092	0.836	336.304	26106	1.773	0.564	0.921	1.51449
15	IFT88_KAN627-10_1.tif:0015-0629	0.837	123.831	0	319	19.755	71.434	0.951	103.689	8049	1.159	0.863	0.949	0.466948
16	IFT88_KAN627-10_1.tif:0016-0662	0.76	108.034	0	267	106.633	75.203	0.953	82.111	6374	1.278	0.782	0.967	0.369776
17	IFT88_KAN627-10_1.tif:0017-0723	0.992	211.909	0	851	72.294	82.076	0.951	210.2	16317	1.259	0.794	0.981	0.946601
18	IFT88_KAN627-10_1.tif:0018-0786	0.18	158.571	8	418	0.454	89.268	0.718	28.599	2220	3.5	0.286	1	0.128789
19	IFT88_KAN627-10_1.tif:0019-0792	0.915	206.366	0	525	140.109	89.898	0.924	188.751	14652	1.13	0.885	0.993	0.850009
20	IFT88_KAN627-10_1.tif:0020-0804	1.52	114.483	0	721	54.019	91.263	0.782	174.026	13509	1.459	0.685	0.877	0.7837
21	IFT88_KAN627-10_1.tif:0021-0821	1.301	141.921	0	737	139.624	93.236	0.836	184.654	14334	1.504	0.665	0.878	0.831561
22	IFT88_KAN627-10_1.tif:0022-0836	0.799	166.435	0	433	11.804	94.886	0.96	132.932	10319	1.081	0.925	0.984	0.598638
23	IFT88_KAN627-10_1.tif:0023-0835	0.386	28	0	57	115.713	94.773	0.976	10.821	840	1.2	0.833	1	0.0487311
24	IFT88_KAN627-10_1.tif:0024-0840	1.533	130.992	0	798	88.777	95.347	0.866	200.809	15588	1.323	0.756	0.915	0.90431
25	IFT88_KAN627-10_1.tif:0025-0891	0.76	131.102	0	401	41.579	101.212	0.914	99.644	7735	1.316	0.76	0.967	0.448732
26	IFT88_KAN627-10_1.tif:0026-0917	0.812	167.286	0	594	39.618	104.086	0.937	135.766	10539	1.039	0.963	0.992	0.611401
27	IFT88_KAN627-10_1.tif:0027-1038	1.005	204.962	0	811	47.402	117.876	0.929	205.949	15987	1.026	0.975	0.981	0.927457
28	IFT88_KAN627-10_1.tif:0028-1094	0.451	41.743	0	112	117.578	124.177	0.991	18.821	1461	1.065	0.939	0.986	0.0847573
29	IFT88_KAN627-10_2.tif:0001-0103	0.721	206.554	12	528	19.863	11.747	0.92	149.009	11567	1.143	0.875	1	0.671039
30	IFT88_KAN627-10_2.tif:0002-0346	0.824	239.609	6	539	16.004	39.271	0.914	197.549	15335	1	1	1	0.889632
31	IFT88_KAN627-10_2.tif:0003-0366	0.721	227.357	1	532	16.968	41.541	0.92	164.017	12732	1.143	0.875	1	0.738624
32	IFT88_KAN627-10_2.tif:0004-0369	1.327	391.097	0	2988	108.909	41.886	0.96	518.936	40283	1.153	0.867	0.976	2.33695
33	IFT88_KAN627-10_2.tif:0005-0410	1.121	258.494	0	911	70.195	46.529	0.951	289.709	22489	1.114	0.897	0.983	1.30466
34	IFT88_KAN627-10_2.tif:0006-0425	1.688	528.252	0	3986	137.685	48.224	0.953	891.465	69201	1.148	0.871	0.967	4.01457
35	IFT88_KAN627-10_2.tif:0007-0429	0.464	10.028	0	42	143.578	48.692	0.965	4.65	361	1	1	1	0.0209428
36	IFT88_KAN627-10_2.tif:0008-0561	0.992	199.727	0	576	16.236	63.668	0.917	198.116	15379	1.277	0.783	0.981	0.892185
37	IFT88_KAN627-10_2.tif:0009-0583	0.631	214.878	0	686	18.217	66.227	0.935	135.637	10529	1	1	1	0.610821
38	IFT88_KAN627-10_2.tif:0010-0587	0.67	51.712	0	183	91.173	66.649	0.932	34.64	2689	1.229	0.814	0.972	0.155997
39	IFT88_KAN627-10_2.tif:0011-0653	0.631	189.551	0	629	114.578	74.172	0.935	119.65	9288	1	1	1	0.538827
40	IFT88_KAN627-10_2.tif:0012-0664	0.631	176.612	24	413	36.263	75.421	0.935	111.483	8654	1	1	1	0.502046
41	IFT88_KAN627-10_2.tif:0013-0683	0.992	188.078	0	719	35.52	77.526	0.917	186.561	14482	1.277	0.783	0.981	0.840147
42	IFT88_KAN627-10_2.tif:0014-0687	1.25	158.619	0	815	117.26	77.969	0.756	198.206	15386	1.803	0.555	0.886	0.892591
43	IFT88_KAN627-10_2.tif:0015-0983	0.386	43.9	0	208	37.909	111.627	0.976	16.966	1317	1.2	0.833	1	0.0764034
44	IFT88_KAN627-10_2.tif:0016-1008	0.451	130.343	22	287	26	114.4	0.991	58.769	4562	1.065	0.939	0.986	0.264656
45	IFT88_KAN627-10_2.tif:0017-1016	1.237	140.135	0	727	3.984	115.278	0.894	173.305	13453	1.37	0.73	0.95	0.780452
46	IFT88_KAN627-10_2.tif:0018-1108	1.134	118.716	0	566	24.507	125.788	0.982	134.581	10447	1.104	0.906	0.951	0.606064
47	IFT88_KAN627-10_2.tif:0019-1140	0.721	172.536	0	567	75.988	129.39	0.92	124.468	9662	1.143	0.875	1	0.560523
48	IFT88_KAN627-10_2.tif:0020-1151	0.631	177.327	7	560	106.066	130.695	0.935	111.934	8689	1	1	1	0.504077
49	IFT88_KAN627-10_2.tif:0021-1161	0.322	14.6	0	94	8.229	131.83	1	4.702	365	1	1	1	0.0211748
50	IFT88_KAN627-10_2.tif:0022-1173	0.812	189.111	0	692	63.112	133.142	0.937	153.479	11914	1.039	0.963	0.992	0.691169
51	IFT88_KAN627-10_3.tif:0001-0120	0.863	80.657	0	250	90.238	13.66	0.942	69.616	5404	1.145	0.873	0.964	0.313503
52	IFT88_KAN627-10_3.tif:0002-0179	0.605	120.66	0	322	56.239	20.373	0.985	73.055	5671	1.104	0.906	0.979	0.328993
53	IFT88_KAN627-10_3.tif:0003-0211	0.631	161.816	5	568	25.821	24.005	0.935	102.143	7929	1	1	1	0.459987
54	IFT88_KAN627-10_3.tif:0004-0223	0.721	179.214	0	408	109.528	25.367	0.92	129.286	10036	1.143	0.875	1	0.58222
55	IFT88_KAN627-10_3.tif:0005-0228	0.812	173.27	0	471	107.592	25.872	0.937	140.623	10916	1.039	0.963	0.992	0.633272
56	IFT88_KAN627-10_3.tif:0006-0377	2.834	296.018	0	952	65.869	42.825	0.859	838.944	65124	1.39	0.719	0.982	3.77805
57	IFT88_KAN627-10_3.tif:0007-0395	1.804	171.529	0	886	112.838	44.841	0.748	309.354	24014	1.994	0.502	0.959	1.39313
58	IFT88_KAN627-10_3.tif:0008-0396	0.696	160.574	1	320	73.819	44.946	0.967	111.702	8671	1.143	0.875	0.982	0.503032
59	IFT88_KAN627-10_3.tif:0009-0443	3.723	2383.96	0	14453	86.116	50.249	0.872	8875.42	688965	1.237	0.808	0.928	39.9691
60	IFT88_KAN627-10_3.tif:0010-0499	0.992	233.883	0	1095	64.401	56.704	0.951	231.996	18009	1.123	0.89	0.981	1.04476
61	IFT88_KAN627-10_3.tif:0011-0521	1.391	144.296	0	771	66.103	59.192	0.842	200.757	15584	1.433	0.698	0.911	0.904078
62	IFT88_KAN627-10_3.tif:0012-0554	0.812	227.698	0	611	17.246	62.885	0.937	184.796	14345	1.039	0.963	0.992	0.832199
63	IFT88_KAN627-10_3.tif:0013-0609	0.322	139.2	0	340	37.058	69.178	1	44.83	3480	1	1	1	0.201886
64	IFT88_KAN627-10_3.tif:0014-0704	1.288	237.89	0	1055	87.468	79.886	0.875	306.456	23789	1.414	0.707	0.971	1.38008
65	IFT88_KAN627-10_3.tif:0015-0706	1.25	115.526	0	570	118.555	80.132	0.823	144.359	11206	1.509	0.663	0.946	0.650096
66	IFT88_KAN627-10_3.tif:0016-0734	1.829	118.394	0	860	86.719	83.355	0.687	216.576	16812	1.926	0.519	0.838	0.975318
67	IFT88_KAN627-10_3.tif:0017-0749	1.404	220.183	0	995	101.073	85.092	0.913	309.174	24000	1.109	0.902	0.956	1.39232
68	IFT88_KAN627-10_3.tif:0018-0775	0.992	213.935	0	879	100.349	87.968	0.917	212.209	16473	1.259	0.794	0.981	0.955651
69	IFT88_KAN627-10_3.tif:0019-0831	0.786	139.426	0	615	6.474	94.312	0.945	109.564	8505	1.116	0.896	0.976	0.493402
70	IFT88_KAN627-10_3.tif:0020-0932	0.721	226.375	0	610	129.05	105.839	0.92	163.308	12677	1.143	0.875	1	0.735433
71	IFT88_KAN627-10_3.tif:0021-0992	0.631	200.122	33	377	51.586	112.649	0.935	126.323	9806	1	1	1	0.568877
72	IFT88_KAN627-10_3.tif:0022-1046	0.915	24.718	0	130	93.797	118.76	0.945	22.608	1755	1.109	0.902	0.94	0.101813
73	IFT88_KAN627-10_3.tif:0023-1064	1.005	239.821	0	895	36.547	120.754	0.929	240.975	18706	1.309	0.764	0.987	1.08519
74	IFT88_KAN627-10_3.tif:0024-1160	0.631	201.898	0	670	90.63	131.717	0.935	127.444	9893	1	1	1	0.573925
75	IFT88_KAN627-10_3.tif:0025-1170	0.721	182.714	5	593	93.354	132.795	0.92	131.811	10232	1.143	0.875	1	0.593591
76	IFT88_KAN627-10_3.tif:0026-1205	0.812	157.159	0	682	134.731	136.761	0.937	127.547	9901	1.039	0.963	0.992	0.574389
77	IFT88_KAN627-10_4.tif:0001-0157	0.915	222.831	0	614	10.278	17.825	0.924	203.81	15821	1.13	0.885	0.993	0.917827
78	IFT88_KAN627-10_4.tif:0002-0160	0.812	198.476	0	548	67.879	18.166	0.937	161.08	12504	1.039	0.963	0.992	0.725397
79	IFT88_KAN627-10_4.tif:0003-0408	1.34	178	0	612	87.984	46.297	0.898	238.476	18512	1.423	0.703	0.941	1.07394
80	IFT88_KAN627-10_4.tif:0004-0420	0.992	130.792	0	440	43.181	47.663	0.872	129.737	10071	1.587	0.63	0.939	0.584251
81	IFT88_KAN627-10_4.tif:0005-0431	0.979	188.118	1	586	113.168	48.932	0.939	184.178	14297	1.236	0.809	0.974	0.829415
82	IFT88_KAN627-10_4.tif:0006-0470	1.005	180.923	0	647	135.478	53.418	0.929	181.794	14112	1.086	0.921	0.987	0.818682
83	IFT88_KAN627-10_4.tif:0007-0490	1.172	128.286	0	566	135.462	55.68	0.917	150.387	11674	1.253	0.798	0.958	0.677246
84	IFT88_KAN627-10_4.tif:0008-0535	0.721	202.804	0	788	53.345	60.779	0.92	146.304	11357	1.143	0.875	1	0.658856
85	IFT88_KAN627-10_4.tif:0009-0542	0.889	152.246	0	554	56.246	61.544	0.852	135.328	10505	1.315	0.761	0.92	0.609429
86	IFT88_KAN627-10_4.tif:0010-0721	1.159	136.467	0	700	5.727	81.835	0.754	158.22	12282	1.552	0.644	0.865	0.712518
87	IFT88_KAN627-10_4.tif:0011-0769	0.992	132.701	0	535	71.438	87.349	0.951	131.631	10218	1.123	0.89	0.981	0.592779
88	IFT88_KAN627-10_4.tif:0012-0787	0.863	35.015	0	139	141.064	89.376	0.98	30.222	2346	1.162	0.86	0.971	0.136099
89	IFT88_KAN627-10_4.tif:0013-0952	1.314	169.863	0	636	133.792	108.052	0.881	223.198	17326	1.445	0.692	0.949	1.00514
90	IFT88_KAN627-10_4.tif:0014-0975	1.275	127.343	0	736	84.087	110.613	0.91	162.407	12607	1.241	0.806	0.917	0.731372
91	IFT88_KAN627-10_4.tif:0015-1059	0.953	102.068	0	503	32.294	120.253	0.809	97.3	7553	1.834	0.545	0.937	0.438174
92	IFT88_KAN627-10_4.tif:0016-1114	0.631	159.347	8	435	3.916	126.496	0.935	100.585	7808	1	1	1	0.452967
93	IFT88_KAN627-10_4.tif:0017-1136	1.005	212.244	0	692	68.513	128.987	0.929	213.266	16555	1.026	0.975	0.981	0.960408
94	IFT88_KAN627-10_4.tif:0018-1141	0.812	202.079	0	702	110.77	129.51	0.937	164.004	12731	1.039	0.963	0.992	0.738566
										20591.7				1.19459
														0
														0
														0
95	IFT88_KAN627-11_2.tif:0001-0092	0.915	187.732	0	574	119.238	10.436	0.924	171.708	13329	1.13	0.885	0.993	0.773258
96	IFT88_KAN627-11_2.tif:0002-0277	1.52	137.483	0	577	54.396	31.404	0.859	208.989	16223	1.468	0.681	0.929	0.941148
97	IFT88_KAN627-11_2.tif:0003-0274	0.58	21.6	0	62	130.342	31.168	0.99	12.522	972	1.202	0.832	0.968	0.0563888
98	IFT88_KAN627-11_2.tif:0004-0347	1.469	185.895	0	780	94.757	39.365	0.927	273.001	21192	1.199	0.834	0.974	1.22942
99	IFT88_KAN627-11_2.tif:0005-0453	0.528	28.683	0	102	23.501	51.464	0.968	15.15	1176	1.176	0.85	0.988	0.0682235
100	IFT88_KAN627-11_2.tif:0006-0595	1.494	115.966	0	742	124.338	67.552	0.789	173.292	13452	1.734	0.577	0.892	0.780394
101	IFT88_KAN627-11_2.tif:0007-0657	0.631	202.878	0	903	90.176	74.626	0.935	128.062	9941	1	1	1	0.576709
102	IFT88_KAN627-11_2.tif:0008-0775	1.404	169.11	0	931	109.418	87.967	0.942	237.459	18433	1.261	0.793	0.96	1.06936
103	IFT88_KAN627-11_2.tif:0009-0814	0.631	202.163	9	716	61.347	92.446	0.935	127.612	9906	1	1	1	0.574679
104	IFT88_KAN627-11_2.tif:0010-0910	0.631	160.918	0	652	66	103.342	0.935	101.577	7885	1	1	1	0.457434
105	IFT88_KAN627-11_2.tif:0011-0959	0.721	173.482	0	490	39.441	108.847	0.92	125.151	9715	1.143	0.875	1	0.563598
106	IFT88_KAN627-11_2.tif:0012-0973	0.631	181.531	8	628	40.917	110.492	0.935	114.588	8895	1	1	1	0.516027
107	IFT88_KAN627-11_2.tif:0013-0998	0.889	147.145	0	519	86.032	113.251	0.884	130.794	10153	1.418	0.705	0.926	0.589008
108	IFT88_KAN627-11_2.tif:0014-1061	0.721	179.857	0	484	132.398	120.424	0.92	129.75	10072	1.143	0.875	1	0.584309
109	IFT88_KAN627-11_2.tif:0015-1176	0.812	174.048	0	544	82.18	133.47	0.937	141.254	10965	1.039	0.963	0.992	0.636115
110	IFT88_KAN627-11_3.tif:0001-0135	1.031	109.55	0	482	128.631	15.385	0.862	112.9	8764	1.598	0.626	0.93	0.508428
111	IFT88_KAN627-11_3.tif:0002-0229	1.507	176.983	0	1108	17.299	26.031	0.876	266.753	20707	1.415	0.707	0.921	1.20128
112	IFT88_KAN627-11_3.tif:0003-0229	0.94	93.658	0	242	97.881	26.076	0.936	88.076	6837	1.103	0.907	0.954	0.396636
113	IFT88_KAN627-11_3.tif:0004-0321	1.25	145.918	0	817	54.571	36.388	0.813	182.335	14154	1.466	0.682	0.898	0.821119
114	IFT88_KAN627-11_3.tif:0005-0474	1.327	157.01	0	932	137.599	53.794	0.93	208.332	16172	1.324	0.755	0.981	0.938189
115	IFT88_KAN627-11_3.tif:0006-0478	1.095	158.035	0	351	110.669	54.284	0.929	173.047	13433	1.122	0.891	0.977	0.779291
116	IFT88_KAN627-11_3.tif:0007-0508	1.456	201.717	0	969	81.299	57.681	0.881	293.638	22794	1.463	0.683	0.942	1.32235
117	IFT88_KAN627-11_3.tif:0008-0564	0.953	149.959	0	651	44.751	64.014	0.881	142.954	11097	1.285	0.778	0.961	0.643772
118	IFT88_KAN627-11_3.tif:0009-0755	1.082	214.155	0	865	100.026	85.715	0.951	231.739	17989	1.116	0.896	0.971	1.0436
119	IFT88_KAN627-11_3.tif:0010-0759	0.631	149.49	0	445	17.309	86.203	0.935	94.362	7325	1	1	1	0.424947
120	IFT88_KAN627-11_3.tif:0011-1024	0.889	185.826	0	830	100.794	116.276	0.933	165.176	12822	1.172	0.853	0.979	0.743845
121	IFT88_KAN627-11_3.tif:0012-1078	1.069	118.024	0	333	141.139	122.399	0.895	126.195	9796	1.53	0.654	0.933	0.568297
122	IFT88_KAN627-11_3.tif:0013-1110	0.902	183.914	0	610	114.465	125.974	0.947	165.846	12874	1.125	0.889	0.986	0.746862
123	IFT88_KAN627-11_3.tif:0014-1120	0.631	188.49	2	459	57.942	127.177	0.935	118.98	9236	1	1	1	0.53581
124	IFT88_KAN627-11_4.tif:0001-0099	1.481	198.426	0	1245	48.439	11.285	0.837	293.96	22819	1.484	0.674	0.906	1.3238
125	IFT88_KAN627-11_4.tif:0002-0152	0.721	195.411	0	401	135.122	17.252	0.92	140.97	10943	1.143	0.875	1	0.634838
126	IFT88_KAN627-11_4.tif:0003-0326	1.159	207.8	0	1019	112.235	37.029	0.938	240.924	18702	1.188	0.842	0.957	1.08496
127	IFT88_KAN627-11_4.tif:0004-0365	0.631	156.633	0	714	44.549	41.484	0.935	98.871	7675	1	1	1	0.445251
128	IFT88_KAN627-11_4.tif:0005-0385	0.992	252.506	0	1369	105.725	43.765	0.951	250.47	19443	1.06	0.944	0.975	1.12795
129	IFT88_KAN627-11_4.tif:0006-0406	1.43	185.045	0	895	107.411	46.119	0.876	264.601	20540	1.468	0.681	0.974	1.19159
130	IFT88_KAN627-11_4.tif:0007-0429	0.812	193.81	0	543	70.149	48.685	0.937	157.292	12210	1.039	0.963	0.992	0.708341
131	IFT88_KAN627-11_4.tif:0008-0440	0.721	195.911	0	715	0.908	49.997	0.92	141.331	10971	1.143	0.875	1	0.636463
132	IFT88_KAN627-11_4.tif:0009-0495	0.631	158.204	0	493	31.156	56.239	0.935	99.863	7752	1	1	1	0.449718
133	IFT88_KAN627-11_4.tif:0010-0742	0.85	137.03	0	430	139.717	84.27	0.928	116.507	9044	1.258	0.795	0.964	0.524671
134	IFT88_KAN627-11_4.tif:0011-0746	0.94	207.219	0	765	11.477	84.759	0.869	194.87	15127	1.195	0.837	0.948	0.877566
135	IFT88_KAN627-11_4.tif:0012-0768	1.134	131.273	0	502	103.071	87.173	0.949	148.816	11552	1.244	0.804	0.941	0.670168
136	IFT88_KAN627-11_4.tif:0013-0890	0.683	40.377	0	164	60.105	101.023	0.993	27.568	2140	1.148	0.871	0.972	0.124148
137	IFT88_KAN627-11_4.tif:0014-0890	0.631	177.776	11	467	36.036	101.072	0.935	112.217	8711	1	1	1	0.505353
138	IFT88_KAN627-11_4.tif:0015-0933	0.631	174.592	1	392	131.036	105.952	0.935	110.208	8555	1	1	1	0.496303
139	IFT88_KAN627-11_4.tif:0016-1167	0.631	125.469	0	437	140.002	132.511	0.935	79.2	6148	1	1	1	0.356665
										11969.8				0.694406
														0
														0
														0
140	IFT88_KAN627-12_1.tif:0001-0032	0.799	198.823	17	478	35.412	3.632	0.96	158.8	12327	1.081	0.925	0.984	0.715129
141	IFT88_KAN627-12_1.tif:0002-0098	0.734	83.807	0	339	63.678	11.106	0.92	61.539	4777	1.106	0.904	0.942	0.277129
142	IFT88_KAN627-12_1.tif:0003-0267	1.095	117.341	0	518	19.447	30.375	0.916	128.488	9974	1.344	0.744	0.944	0.578624
143	IFT88_KAN627-12_1.tif:0004-0270	1.366	173.689	0	742	58.724	30.681	0.862	237.175	18411	1.499	0.667	0.955	1.06808
144	IFT88_KAN627-12_1.tif:0005-0272	1.649	205.789	0	1247	108.472	30.804	0.895	339.331	26341	1.366	0.732	0.934	1.52813
145	IFT88_KAN627-12_1.tif:0006-0388	0.824	84.25	0	482	64.009	44.079	0.9	69.461	5392	1.302	0.768	0.948	0.312807
146	IFT88_KAN627-12_1.tif:0007-0509	0.528	66.634	0	125	54.033	57.82	0.968	35.194	2732	1.176	0.85	0.988	0.158492
147	IFT88_KAN627-12_1.tif:0008-0589	0.721	191.804	11	641	43.527	66.852	0.92	138.368	10741	1.143	0.875	1	0.62312
148	IFT88_KAN627-12_1.tif:0009-0684	0.799	144.855	0	545	122.807	77.634	0.96	115.696	8981	1.081	0.925	0.984	0.521017
149	IFT88_KAN627-12_1.tif:0010-0814	0.593	125.239	0	264	74.974	92.453	1	74.215	5761	1.052	0.95	0.968	0.334214
150	IFT88_KAN627-12_1.tif:0011-0848	1.108	131.988	0	662	143.205	96.247	0.827	146.226	11351	1.561	0.64	0.891	0.658508
151	IFT88_KAN627-12_1.tif:0012-0892	0.979	194.947	0	729	51.427	101.233	0.939	190.863	14816	1.282	0.78	0.981	0.859524
152	IFT88_KAN627-12_1.tif:0013-0962	0.631	138.286	4	434	75.761	109.244	0.935	87.29	6776	1	1	1	0.393097
153	IFT88_KAN627-12_1.tif:0014-1068	1.043	132.037	0	559	93.009	121.223	0.95	137.776	10695	1.231	0.813	0.953	0.620451
154	IFT88_KAN627-12_1.tif:0015-1122	0.605	90.043	3	257	132.511	127.404	0.985	54.518	4232	1.104	0.906	0.979	0.245512
155	IFT88_KAN627-12_2.tif:0001-0005	0.451	185.857	10	438	55.331	0.624	0.938	83.799	6505	1.4	0.714	1	0.377376
156	IFT88_KAN627-12_2.tif:0002-0191	0.631	165.061	0	459	89.495	21.735	0.935	104.192	8088	1	1	1	0.469211
157	IFT88_KAN627-12_2.tif:0003-0214	1.237	228.5	0	846	36.886	24.278	0.936	282.585	21936	1.049	0.953	0.98	1.27258
158	IFT88_KAN627-12_2.tif:0004-0295	0.451	68.114	0	198	30.426	33.474	0.991	30.711	2384	1.065	0.939	0.986	0.138303
159	IFT88_KAN627-12_2.tif:0005-0352	0.721	180.125	20	504	11.18	39.952	0.92	129.943	10087	1.143	0.875	1	0.585179
160	IFT88_KAN627-12_2.tif:0006-0385	0.386	54.167	0	246	109.074	43.754	0.976	20.934	1625	1.2	0.833	1	0.0942714
161	IFT88_KAN627-12_2.tif:0007-0679	0.644	47.1	0	248	31.485	77.078	0.937	30.338	2355	1.176	0.85	0.943	0.136621
162	IFT88_KAN627-12_2.tif:0008-0689	0.631	144.327	0	651	103.115	78.258	0.935	91.103	7072	1	1	1	0.410269
163	IFT88_KAN627-12_2.tif:0009-0696	1.443	96.268	0	384	140.18	79.108	0.815	138.896	10782	1.581	0.632	0.9	0.625498
164	IFT88_KAN627-12_2.tif:0010-0845	0.721	174.161	0	559	80.699	95.964	0.92	125.641	9753	1.143	0.875	1	0.565803
165	IFT88_KAN627-12_2.tif:0011-0875	0.464	81.333	0	386	32.234	99.313	0.965	37.719	2928	1	1	1	0.169863
166	IFT88_KAN627-12_2.tif:0012-0935	1.005	196.231	0	798	100.056	106.185	0.963	197.176	15306	1.032	0.969	0.981	0.88795
167	IFT88_KAN627-12_2.tif:0013-0985	0.631	200.531	2	895	79.62	111.854	0.935	126.581	9826	1	1	1	0.570038
168	IFT88_KAN627-12_2.tif:0014-0995	0.567	37.545	0	106	49.765	112.984	1	21.281	1652	1.141	0.877	0.946	0.0958378
169	IFT88_KAN627-12_2.tif:0015-1145	0.322	77.08	0	327	77.237	130.014	1	24.824	1927	1	1	1	0.111791
170	IFT88_KAN627-12_2.tif:0016-1181	0.322	7.8	0	43	62.595	134.1	1	2.512	195	1	1	1	0.0113126
171	IFT88_KAN627-12_3.tif:0001-0091	0.721	187.286	30	521	58.339	10.385	0.92	135.109	10488	1.143	0.875	1	0.608442
172	IFT88_KAN627-12_3.tif:0002-0154	0.902	166.414	0	570	98.688	17.479	0.947	150.065	11649	1.146	0.873	0.986	0.675796
173	IFT88_KAN627-12_3.tif:0003-0220	0.631	185.959	0	497	110.152	25.027	0.935	117.383	9112	1	1	1	0.528616
174	IFT88_KAN627-12_3.tif:0004-0238	0.593	19.913	0	115	16.329	27.001	0.92	11.8	916	1.363	0.734	0.979	0.0531401
175	IFT88_KAN627-12_3.tif:0005-0377	0.824	202.516	0	729	107.031	42.79	0.914	166.967	12961	1	1	1	0.751909
176	IFT88_KAN627-12_3.tif:0006-0380	0.902	181.757	0	706	65.887	43.141	0.947	163.901	12723	1.125	0.889	0.986	0.738102
177	IFT88_KAN627-12_3.tif:0007-0463	0.812	140.048	0	443	30.021	52.607	0.9	113.66	8823	1.286	0.778	1	0.51185
178	IFT88_KAN627-12_3.tif:0008-0485	0.992	225.545	0	935	92.219	55.115	0.951	223.726	17367	1.06	0.944	0.975	1.00752
179	IFT88_KAN627-12_3.tif:0009-0563	0.721	209.179	0	465	82.515	63.957	0.92	150.903	11714	1.143	0.875	1	0.679567
180	IFT88_KAN627-12_3.tif:0010-0632	1.005	210.5	0	842	87.231	71.795	0.963	211.514	16419	1.032	0.969	0.981	0.952519
181	IFT88_KAN627-12_3.tif:0011-0742	0.631	195.102	3	520	108.222	84.274	0.935	123.154	9560	1	1	1	0.554606
182	IFT88_KAN627-12_3.tif:0012-0765	0.631	163.122	0	548	6.867	86.884	0.935	102.968	7993	1	1	1	0.463699
183	IFT88_KAN627-12_3.tif:0013-0842	0.631	183.571	0	463	48.862	95.624	0.935	115.876	8995	1	1	1	0.521829
184	IFT88_KAN627-12_3.tif:0014-0976	1.108	178.07	0	738	119.365	110.765	0.94	197.279	15314	1.123	0.891	0.983	0.888414
185	IFT88_KAN627-12_3.tif:0015-0993	0.631	229.449	4	594	40.803	112.762	0.935	144.835	11243	1	1	1	0.652242
186	IFT88_KAN627-12_3.tif:0016-1037	0.631	210.959	31	441	141.818	117.756	0.935	133.164	10337	1	1	1	0.599682
187	IFT88_KAN627-12_4.tif:0001-0054	1.108	201.651	0	771	14.131	6.129	0.974	223.404	17342	1.11	0.901	0.977	1.00606
188	IFT88_KAN627-12_4.tif:0002-0164	1.147	181.36	0	833	11.995	18.663	0.897	207.932	16141	1.371	0.729	0.957	0.936391
189	IFT88_KAN627-12_4.tif:0003-0255	0.451	22.771	0	95	56.742	28.951	0.991	10.267	797	1.065	0.939	0.986	0.0462365
190	IFT88_KAN627-12_4.tif:0004-0313	0.322	93.44	12	175	87.565	35.582	1	30.093	2336	1	1	1	0.135519
191	IFT88_KAN627-12_4.tif:0005-0349	0.902	244	0	1251	57.533	39.68	0.911	220.029	17080	1.149	0.87	0.986	0.990865
192	IFT88_KAN627-12_4.tif:0006-0403	1.25	178.67	0	705	77.741	45.713	0.904	223.262	17331	1.205	0.83	0.946	1.00543
193	IFT88_KAN627-12_4.tif:0007-0404	0.58	36.933	0	189	131.313	45.835	0.943	21.41	1662	1.352	0.74	0.968	0.0964179
194	IFT88_KAN627-12_4.tif:0008-0434	0.812	169.27	12	577	33.817	49.265	0.937	137.376	10664	1.039	0.963	0.992	0.618653
195	IFT88_KAN627-12_4.tif:0009-0504	0.799	193.919	0	584	59.701	57.204	0.96	154.883	12023	1.081	0.925	0.984	0.697493
196	IFT88_KAN627-12_4.tif:0010-0585	1.469	144.649	0	803	76.311	66.403	0.889	212.428	16490	1.469	0.681	0.942	0.956638
197	IFT88_KAN627-12_4.tif:0011-0669	1.198	269.409	0	1175	15.72	76	0.969	322.765	25055	1.202	0.832	0.969	1.45352
198	IFT88_KAN627-12_4.tif:0012-0717	0.631	173.898	0	519	70.654	81.436	0.935	109.77	8521	1	1	1	0.49433
199	IFT88_KAN627-12_4.tif:0013-0760	0.631	195.49	0	683	45.003	86.317	0.935	123.399	9579	1	1	1	0.555708
200	IFT88_KAN627-12_4.tif:0014-0869	1.095	116.776	0	562	83.079	98.623	0.886	127.869	9926	1.373	0.728	0.939	0.575839
201	IFT88_KAN627-12_4.tif:0015-1010	0.928	128.431	0	488	59.379	114.684	0.845	119.122	9247	1.472	0.679	0.889	0.536448
202	IFT88_KAN627-12_4.tif:0016-1071	0.696	178.019	0	509	49.553	121.544	0.926	123.837	9613	1.152	0.868	0.982	0.557681
203	IFT88_KAN627-12_4.tif:0017-1202	0.386	54.333	0	132	110.606	136.427	0.976	20.998	1630	1.2	0.833	1	0.0945615
										9793.42				0.568148
														0
														0
														0
204	IFT88_KAN627-13_1.tif:0001-0036	1.662	164.426	0	1010	83.944	4.077	0.832	273.245	21211	1.335	0.749	0.905	1.23052
205	IFT88_KAN627-13_1.tif:0002-0151	1.366	206.557	0	1242	31.145	17.13	0.927	282.057	21895	1.094	0.914	0.981	1.2702
206	IFT88_KAN627-13_1.tif:0003-0262	1.43	138.829	0	773	112.706	29.765	0.93	198.516	15410	1.215	0.823	0.965	0.893983
207	IFT88_KAN627-13_1.tif:0004-0274	1.533	222	0	1458	57.307	31.078	0.819	340.323	26418	1.59	0.629	0.922	1.53259
208	IFT88_KAN627-13_1.tif:0005-0332	1.881	236.253	0	1283	138.64	37.654	0.853	444.348	34493	1.523	0.657	0.918	2.00105
209	IFT88_KAN627-13_1.tif:0006-0358	1.469	162.596	0	915	12.556	40.719	0.889	238.785	18536	1.338	0.747	0.95	1.07533
210	IFT88_KAN627-13_1.tif:0007-0402	1.636	277.299	0	1744	51.514	45.611	0.951	453.674	35217	1.104	0.906	0.955	2.04305
211	IFT88_KAN627-13_1.tif:0008-0486	0.76	28.932	0	219	100.343	55.189	0.953	21.99	1707	1.025	0.975	0.959	0.0990285
212	IFT88_KAN627-13_1.tif:0009-0496	1.52	163.246	0	780	60.071	56.28	0.948	248.151	19263	1.321	0.757	0.963	1.11751
213	IFT88_KAN627-13_1.tif:0010-0655	0.322	292.92	9	721	54.991	74.399	1	94.337	7323	1	1	1	0.424831
214	IFT88_KAN627-13_1.tif:0011-0668	1.378	152.084	0	946	93.926	75.812	0.881	209.633	16273	1.334	0.75	0.995	0.944049
215	IFT88_KAN627-13_1.tif:0012-0827	0.193	10.333	0	114	144.769	93.921	1	1.997	155	1.667	0.6	1	0.00899205
216	IFT88_KAN627-13_1.tif:0013-0913	0.76	85.441	0	529	58.042	103.682	0.994	64.939	5041	1.303	0.767	0.967	0.292445
217	IFT88_KAN627-13_1.tif:0014-0927	0.812	188.413	0	568	23.501	105.208	0.937	152.912	11870	1.039	0.963	0.992	0.688617
218	IFT88_KAN627-13_1.tif:0015-0957	0.721	172.321	0	611	4.2	108.676	0.92	124.314	9650	1.143	0.875	1	0.559827
219	IFT88_KAN627-13_1.tif:0016-0984	1.031	168.537	0	689	20.753	111.744	0.875	173.691	13483	1.288	0.777	0.941	0.782192
220	IFT88_KAN627-13_1.tif:0017-0993	1.211	125.16	0	379	108.29	112.708	0.892	151.56	11765	1.621	0.617	0.913	0.682525
221	IFT88_KAN627-13_1.tif:0018-1049	0.812	179.286	2	431	15.72	119.118	0.9	145.505	11295	1.286	0.778	1	0.655259
222	IFT88_KAN627-13_1.tif:0019-1144	1.262	174.908	0	956	77.475	129.94	0.885	220.815	17141	1.431	0.699	0.966	0.994404
223	IFT88_KAN627-13_1.tif:0020-1177	0.863	113.03	0	335	56.734	133.651	0.98	97.557	7573	1.162	0.86	0.971	0.439334
224	IFT88_KAN627-13_2.tif:0001-0115	1.288	291.54	0	1550	100.325	13.072	0.932	375.569	29154	1.11	0.901	0.962	1.69132
225	IFT88_KAN627-13_2.tif:0002-0330	1.61	152.776	0	983	117.698	37.451	0.837	246.012	19097	1.482	0.675	0.943	1.10788
226	IFT88_KAN627-13_2.tif:0003-0383	1.778	88.355	0	715	78.095	43.483	0.88	157.073	12193	1.35	0.74	0.929	0.707355
227	IFT88_KAN627-13_2.tif:0004-0412	1.726	131.978	0	973	44.041	46.764	0.878	227.823	17685	1.616	0.619	0.94	1.02596
228	IFT88_KAN627-13_2.tif:0005-0415	0.451	43.8	0	108	123.366	47.111	0.991	19.748	1533	1.065	0.939	0.986	0.0889342
229	IFT88_KAN627-13_2.tif:0006-0594	1.314	174.235	0	1135	19.017	67.43	0.95	228.943	17772	1.179	0.848	0.967	1.03101
230	IFT88_KAN627-13_2.tif:0007-0608	2.357	106.945	0	987	99.713	69.032	0.877	252.119	19571	1.448	0.691	0.931	1.13538
231	IFT88_KAN627-13_2.tif:0008-0714	1.958	216.77	0	1730	62.215	81.114	0.824	424.457	32949	1.643	0.609	0.93	1.91148
232	IFT88_KAN627-13_2.tif:0009-0715	1.314	159.863	0	873	18.394	81.176	0.881	210.058	16306	1.34	0.746	0.927	0.945963
233	IFT88_KAN627-13_2.tif:0010-0850	1.288	156.28	0	554	20.747	96.508	0.981	201.324	15628	1.104	0.906	0.935	0.90663
234	IFT88_KAN627-13_2.tif:0011-0914	1.572	144.402	0	1013	53.524	103.76	0.877	226.947	17617	1.416	0.706	0.904	1.02202
235	IFT88_KAN627-13_2.tif:0012-0915	2.048	223.34	0	1918	117.748	103.837	0.833	457.462	35511	1.286	0.778	0.903	2.06011
236	IFT88_KAN627-13_2.tif:0013-1047	1.469	192.298	0	1222	91.881	118.838	0.916	282.405	21922	1.165	0.859	0.934	1.27177
237	IFT88_KAN627-13_2.tif:0014-1106	1.533	108.16	0	581	56.532	125.588	0.832	165.807	12871	1.659	0.603	0.895	0.746688
238	IFT88_KAN627-13_2.tif:0015-1208	0.631	179.571	6	545	4.597	137.165	0.935	113.351	8799	1	1	1	0.510458
239	IFT88_KAN627-13_2.tif:0016-1211	0.322	45.32	0	106	13.79	137.505	1	14.596	1133	1	1	1	0.065729
240	IFT88_KAN627-13_2.tif:0017-1220	1.301	76.851	0	412	113.495	138.564	0.788	99.992	7762	1.408	0.71	0.871	0.450298
241	IFT88_KAN627-13_3.tif:0001-0132	1.636	110.039	0	693	74.407	15.043	0.789	180.029	13975	1.764	0.567	0.882	0.810734
242	IFT88_KAN627-13_3.tif:0002-0211	0.631	177.122	3	828	140.57	24.005	0.935	111.805	8679	1	1	1	0.503497
243	IFT88_KAN627-13_3.tif:0003-0332	1.932	126.94	0	1017	110.093	37.721	0.76	245.291	19041	1.753	0.57	0.857	1.10463
244	IFT88_KAN627-13_3.tif:0004-0334	0.824	191.438	0	570	2.497	37.909	0.914	157.833	12252	1	1	1	0.710778
245	IFT88_KAN627-13_3.tif:0005-0353	1.147	46.124	0	201	72.665	40.084	0.959	52.882	4105	1.078	0.927	0.957	0.238144
246	IFT88_KAN627-13_3.tif:0006-0399	1.43	104.82	0	506	23.153	45.355	0.841	149.885	11635	1.742	0.574	0.941	0.674984
247	IFT88_KAN627-13_3.tif:0007-0471	1.546	142.6	0	1041	122.068	53.546	0.925	220.441	17112	1.346	0.743	0.945	0.992722
248	IFT88_KAN627-13_3.tif:0008-0511	1.559	173.008	0	1128	89.514	58.067	0.856	269.677	20934	1.334	0.75	0.927	1.21445
249	IFT88_KAN627-13_3.tif:0009-0690	1.984	128.688	0	1019	51.586	78.347	0.752	255.3	19818	1.893	0.528	0.922	1.14971
250	IFT88_KAN627-13_3.tif:0010-0716	1.391	195.63	0	1109	67.263	81.316	0.962	272.176	21128	1.096	0.912	0.952	1.2257
251	IFT88_KAN627-13_3.tif:0011-0728	1.61	139.76	0	829	117.501	82.72	0.884	225.053	17470	1.34	0.746	0.943	1.01349
252	IFT88_KAN627-13_3.tif:0012-0758	0.721	173.446	0	411	117.189	86.033	0.92	125.125	9713	1.143	0.875	1	0.563482
253	IFT88_KAN627-13_3.tif:0013-0855	1.469	131.465	0	471	108.191	97.027	0.83	193.066	14987	1.74	0.575	0.916	0.869444
254	IFT88_KAN627-13_3.tif:0014-0859	1.353	183.848	0	985	115.164	97.58	0.965	248.679	19304	1.044	0.957	0.95	1.11989
255	IFT88_KAN627-13_3.tif:0015-0991	1.043	178.346	0	887	78.516	112.504	0.886	186.097	14446	1.359	0.736	0.959	0.838059
256	IFT88_KAN627-13_3.tif:0016-1176	0.799	184.113	0	669	58.744	133.527	0.922	147.051	11415	1.288	0.776	0.992	0.662221
257	IFT88_KAN627-13_3.tif:0017-1193	1.353	240.01	0	896	11.308	135.402	0.948	324.646	25201	1.12	0.893	0.981	1.46199
258	IFT88_KAN627-13_3.tif:0018-1270	0.322	6.28	0	47	97.099	144.202	1	2.023	157	1	1	1	0.00910807
259	IFT88_KAN627-13_4.tif:0001-0103	0.605	119.34	0	262	57.324	11.682	0.94	72.257	5609	1.336	0.748	0.989	0.325396
260	IFT88_KAN627-13_4.tif:0002-0116	1.559	184.322	0	1238	61.515	13.187	0.917	287.313	22303	1.292	0.774	0.972	1.29387
261	IFT88_KAN627-13_4.tif:0003-0122	1.301	177.95	0	976	33.967	13.873	0.929	231.533	17973	1.292	0.774	0.931	1.04267
262	IFT88_KAN627-13_4.tif:0004-0152	1.301	210.455	0	1052	73.464	17.226	0.912	273.825	21256	1.345	0.744	0.981	1.23313
263	IFT88_KAN627-13_4.tif:0005-0240	1.713	134.383	0	1247	35.637	27.195	0.871	230.244	17873	1.366	0.732	0.911	1.03687
264	IFT88_KAN627-13_4.tif:0006-0348	1.675	147.138	0	818	54.514	39.565	0.909	246.412	19128	1.404	0.712	0.939	1.10968
265	IFT88_KAN627-13_4.tif:0007-0401	1.507	111.496	0	687	113.547	45.606	0.828	168.049	13045	1.428	0.7	0.907	0.756782
266	IFT88_KAN627-13_4.tif:0008-0470	0.966	158.267	31	374	8.422	53.362	0.926	152.912	11870	1.261	0.793	0.968	0.688617
267	IFT88_KAN627-13_4.tif:0009-0548	1.34	176	0	794	135.364	62.257	0.871	235.797	18304	1.295	0.772	0.933	1.06187
268	IFT88_KAN627-13_4.tif:0010-0620	1.43	349.171	0	1909	76.221	70.432	0.902	499.29	38758	1.11	0.901	0.961	2.24848
269	IFT88_KAN627-13_4.tif:0011-0743	1.018	122.481	0	463	142.485	84.317	0.927	124.649	9676	1.203	0.831	0.946	0.561336
270	IFT88_KAN627-13_4.tif:0012-0775	1.262	182.551	0	802	99.046	87.985	0.943	230.463	17890	1.335	0.749	0.966	1.03786
271	IFT88_KAN627-13_4.tif:0013-0805	1.366	148.557	0	558	94.851	91.409	0.888	202.857	15747	1.492	0.67	0.959	0.913534
272	IFT88_KAN627-13_4.tif:0014-0937	1.43	235.135	0	1455	112.431	106.422	0.902	336.227	26100	1.459	0.685	0.978	1.51414
273	IFT88_KAN627-13_4.tif:0015-0960	1.018	167.797	0	509	55.093	109.017	0.941	170.767	13256	1.001	0.999	0.988	0.769023
274	IFT88_KAN627-13_4.tif:0016-1134	1.172	194.56	0	891	58.347	128.718	0.917	228.08	17705	1.154	0.867	0.958	1.02712
275	IFT88_KAN627-13_4.tif:0017-1169	1.494	136.698	0	924	82.815	132.708	0.879	204.274	15857	1.154	0.867	0.935	0.919915
										16068.7				0.932195
														0
														0
														0
276	IFT88_KAN627-14_1.tif:0001-0019	1.005	347.128	0	2338	75.891	2.207	0.929	348.8	27076	1.026	0.975	0.981	1.57077
277	IFT88_KAN627-14_1.tif:0002-0150	1.404	113.936	0	590	71.523	17.099	0.85	159.985	12419	1.688	0.593	0.932	0.720466
278	IFT88_KAN627-14_1.tif:0003-0206	0.631	166.449	8	484	25.254	23.438	0.935	105.068	8156	1	1	1	0.473156
279	IFT88_KAN627-14_1.tif:0004-0224	0.709	86.764	0	322	22.637	25.417	0.943	61.474	4772	1.15	0.87	0.991	0.276839
280	IFT88_KAN627-14_1.tif:0005-0279	1.791	175.094	0	1082	62.679	31.703	0.887	313.528	24338	1.256	0.796	0.93	1.41193
281	IFT88_KAN627-14_1.tif:0006-0302	1.481	191.713	0	1229	131.63	34.258	0.897	284.015	22047	1.411	0.709	0.954	1.27902
282	IFT88_KAN627-14_1.tif:0007-0326	1.288	101.24	0	507	108.791	37.04	0.891	130.42	10124	1.292	0.774	0.917	0.587326
283	IFT88_KAN627-14_1.tif:0008-0446	1.043	64.864	0	296	53.461	50.646	0.936	67.683	5254	1.26	0.794	0.915	0.304801
284	IFT88_KAN627-14_1.tif:0009-0542	1.108	137.023	0	527	33.666	61.509	0.879	151.804	11784	1.368	0.731	0.989	0.683627
285	IFT88_KAN627-14_1.tif:0010-0595	1.945	111.517	0	612	91.82	67.584	0.698	216.924	16839	1.921	0.52	0.853	0.976884
286	IFT88_KAN627-14_1.tif:0011-0685	1.842	128.329	0	802	32.21	77.809	0.823	236.402	18351	1.882	0.531	0.969	1.0646
287	IFT88_KAN627-14_1.tif:0012-0732	1.907	90.135	0	763	128.495	83.087	0.757	171.849	13340	2.106	0.475	0.919	0.773896
288	IFT88_KAN627-14_1.tif:0013-0744	1.507	112.872	0	495	50.653	84.428	0.673	170.123	13206	2.262	0.442	0.851	0.766122
289	IFT88_KAN627-14_1.tif:0014-0808	1.726	138.313	0	922	121.242	91.779	0.67	238.76	18534	2.055	0.487	0.838	1.07522
290	IFT88_KAN627-14_1.tif:0015-0831	1.043	173.457	0	944	43.515	94.333	0.95	180.996	14050	1.281	0.781	0.97	0.815085
291	IFT88_KAN627-14_1.tif:0016-0834	1.765	112.453	0	665	23.713	94.628	0.672	198.464	15406	2.143	0.467	0.811	0.893751
292	IFT88_KAN627-14_1.tif:0017-0994	1.288	146.58	0	615	130.666	112.792	0.728	188.828	14658	1.822	0.549	0.847	0.850357
293	IFT88_KAN627-14_1.tif:0018-1061	1.61	105.272	0	488	65.312	120.45	0.757	169.518	13159	1.723	0.58	0.865	0.763396
294	IFT88_KAN627-14_1.tif:0019-1135	0.915	194.028	0	695	88.763	128.873	0.924	177.466	13776	1.13	0.885	0.993	0.79919
295	IFT88_KAN627-14_2.tif:0001-0073	0.824	240.203	0	1383	124.623	8.286	0.914	198.039	15373	1	1	1	0.891837
296	IFT88_KAN627-14_2.tif:0002-0143	1.726	145.627	0	979	119.007	16.231	0.719	251.384	19514	1.853	0.54	0.84	1.13207
297	IFT88_KAN627-14_2.tif:0003-0175	1.726	106.94	0	563	58.854	19.923	0.811	184.603	14330	1.47	0.68	0.902	0.831329
298	IFT88_KAN627-14_2.tif:0004-0297	1.404	133.321	0	582	22.163	33.734	0.793	187.205	14532	1.639	0.61	0.883	0.843048
299	IFT88_KAN627-14_2.tif:0005-0305	0.902	181.471	4	568	142.783	34.674	0.947	163.643	12703	1.146	0.873	0.986	0.736942
300	IFT88_KAN627-14_2.tif:0006-0367	0.812	58.81	0	225	82.8	41.641	0.921	47.729	3705	1.216	0.822	0.94	0.214939
301	IFT88_KAN627-14_2.tif:0007-0585	1.585	100.919	0	483	132.817	66.374	0.764	159.907	12413	1.569	0.637	0.863	0.720118
302	IFT88_KAN627-14_2.tif:0008-0629	1.855	106.125	0	883	36.315	71.398	0.72	196.867	15282	1.878	0.532	0.867	0.886558
303	IFT88_KAN627-14_2.tif:0009-0628	1.546	166.708	0	1000	114.017	71.272	0.873	257.709	20005	1.437	0.696	0.941	1.16055
304	IFT88_KAN627-14_2.tif:0010-0688	1.546	134.675	0	620	91.784	78.215	0.734	208.19	16161	1.96	0.51	0.916	0.937551
305	IFT88_KAN627-14_2.tif:0011-0732	0.799	183	0	755	11.01	83.082	0.96	146.162	11346	1.081	0.925	0.984	0.658218
306	IFT88_KAN627-14_2.tif:0012-0779	0.902	174.5	0	670	86.43	88.417	0.947	157.357	12215	1.146	0.873	0.986	0.708631
307	IFT88_KAN627-14_2.tif:0013-0899	1.147	118.652	0	580	43.841	102.12	0.694	136.037	10560	1.893	0.528	0.832	0.612619
308	IFT88_KAN627-14_2.tif:0014-0915	0.631	153.449	0	440	4.143	103.909	0.935	96.862	7519	1	1	1	0.436201
309	IFT88_KAN627-14_2.tif:0015-0974	0.631	28.286	0	174	78.198	110.61	0.961	17.855	1386	1.28	0.781	0.942	0.0804063
310	IFT88_KAN627-14_2.tif:0016-1062	1.456	138.009	0	675	20.365	120.548	0.787	200.899	15595	1.703	0.587	0.95	0.904716
311	IFT88_KAN627-14_2.tif:0017-1064	1.366	106.132	0	413	108.744	120.769	0.75	144.925	11250	1.676	0.597	0.858	0.652648
312	IFT88_KAN627-14_2.tif:0018-1081	0.631	174.122	0	532	20.827	122.75	0.935	109.911	8532	1	1	1	0.494969
313	IFT88_KAN627-14_3.tif:0001-0008	1.391	138.796	0	790	39.573	0.897	0.818	193.105	14990	1.529	0.654	0.911	0.869618
314	IFT88_KAN627-14_3.tif:0002-0026	0.631	203.714	18	508	101.753	3.008	0.935	128.591	9982	1	1	1	0.579088
315	IFT88_KAN627-14_3.tif:0003-0045	0.515	65.15	0	349	125.758	5.164	0.994	33.571	2606	1.209	0.827	0.976	0.151182
316	IFT88_KAN627-14_3.tif:0004-0091	0.953	156.378	0	598	109.903	10.33	0.914	149.073	11572	1.258	0.795	0.967	0.671329
317	IFT88_KAN627-14_3.tif:0005-0151	0.721	175.804	6	493	142.329	17.195	0.92	126.826	9845	1.143	0.875	1	0.57114
318	IFT88_KAN627-14_3.tif:0006-0163	1.636	105.78	0	424	63.692	18.557	0.888	173.06	13434	1.341	0.746	0.924	0.779349
319	IFT88_KAN627-14_3.tif:0007-0201	0.631	169.306	2	600	45.911	22.87	0.935	106.871	8296	1	1	1	0.481277
320	IFT88_KAN627-14_3.tif:0008-0221	1.069	176.614	0	719	5.93	25.155	0.94	188.841	14659	1.098	0.911	0.96	0.850415
321	IFT88_KAN627-14_3.tif:0009-0384	0.631	122.122	0	477	15.152	43.641	0.935	77.087	5984	1	1	1	0.347151
322	IFT88_KAN627-14_3.tif:0010-0491	1.7	160.5	0	1117	74.035	55.733	0.842	272.923	21186	1.468	0.681	0.901	1.22907
323	IFT88_KAN627-14_3.tif:0011-0503	1.688	150.389	0	991	118.957	57.134	0.845	253.793	19701	1.586	0.631	0.942	1.14292
324	IFT88_KAN627-14_3.tif:0012-0716	1.275	144.99	0	836	30.004	81.263	0.922	184.912	14354	1.147	0.872	0.952	0.832721
325	IFT88_KAN627-14_3.tif:0013-0751	1.507	115.316	0	921	100.074	85.252	0.818	173.807	13492	1.57	0.637	0.886	0.782714
326	IFT88_KAN627-14_3.tif:0014-0950	0.322	126.8	0	451	139.094	107.882	1	40.837	3170	1	1	1	0.183902
327	IFT88_KAN627-14_3.tif:0015-1144	0.631	173.857	15	500	39.328	129.901	0.935	109.744	8519	1	1	1	0.494214
328	IFT88_KAN627-14_3.tif:0016-1192	0.618	18.167	0	147	59.02	135.292	0.916	11.233	872	1.333	0.75	1	0.0505875
329	IFT88_KAN627-14_3.tif:0017-1199	0.799	157.355	10	435	120.878	136.087	0.96	125.679	9756	1.081	0.925	0.984	0.565977
330	IFT88_KAN627-14_3.tif:0018-1222	0.902	161.371	0	548	86.487	138.754	0.947	145.518	11296	1.146	0.873	0.986	0.655317
331	IFT88_KAN627-14_3.tif:0019-1274	0.541	194.667	46	400	5.051	144.599	0.943	105.325	8176	1.167	0.857	1	0.474316
332	IFT88_KAN627-14_4.tif:0001-0012	0.824	204.891	0	641	120.764	1.362	0.914	168.925	13113	1	1	1	0.760727
333	IFT88_KAN627-14_4.tif:0002-0050	1.134	127.33	0	532	9.896	5.663	0.77	144.346	11205	1.736	0.576	0.917	0.650038
334	IFT88_KAN627-14_4.tif:0003-0065	0.657	33.902	0	189	73.26	7.385	0.955	22.273	1729	1.279	0.782	0.962	0.100305
335	IFT88_KAN627-14_4.tif:0004-0085	0.992	248.74	0	1037	95.849	9.703	0.917	246.734	19153	1.122	0.891	0.975	1.11113
336	IFT88_KAN627-14_4.tif:0005-0150	1.546	197.675	0	1062	35.366	17.083	0.839	305.58	23721	1.22	0.82	0.886	1.37613
337	IFT88_KAN627-14_4.tif:0006-0233	1.237	199.771	0	847	127.774	26.402	0.924	247.056	19178	1.119	0.894	0.941	1.11258
338	IFT88_KAN627-14_4.tif:0007-0338	1.095	227.918	0	1072	78.688	38.388	0.898	249.568	19373	1.177	0.85	0.977	1.12389
339	IFT88_KAN627-14_4.tif:0008-0465	1.456	166.389	0	1021	37.43	52.794	0.748	242.212	18802	1.739	0.575	0.859	1.09076
340	IFT88_KAN627-14_4.tif:0009-0590	0.631	152.939	0	701	84.16	67.022	0.935	96.54	7494	1	1	1	0.434751
341	IFT88_KAN627-14_4.tif:0010-0611	0.799	90.145	0	331	15.108	69.338	0.922	71.999	5589	1.071	0.934	0.984	0.324236
342	IFT88_KAN627-14_4.tif:0011-0618	0.322	28.16	0	92	134.668	70.2	1	9.069	704	1	1	1	0.0408413
343	IFT88_KAN627-14_4.tif:0012-0648	1.185	270.511	0	1195	65.673	73.61	0.927	320.601	24887	1.246	0.803	0.968	1.44377
344	IFT88_KAN627-14_4.tif:0013-0720	1.52	160.831	0	930	96.973	81.713	0.714	244.479	18978	1.729	0.578	0.837	1.10097
345	IFT88_KAN627-14_4.tif:0014-0965	0.631	178.816	3	522	58.055	109.584	0.935	112.874	8762	1	1	1	0.508312
346	IFT88_KAN627-14_4.tif:0015-1122	0.657	15.765	0	76	67.91	127.33	0.875	10.357	804	1.556	0.643	0.971	0.0466426
347	IFT88_KAN627-14_4.tif:0016-1150	0.837	36.2	0	122	131.654	130.577	0.951	30.312	2353	1.429	0.7	0.963	0.136505
348	IFT88_KAN627-14_5.tif:0001-0053	0.85	160.091	0	653	6.328	6.072	0.928	136.114	10566	1.435	0.697	0.971	0.612967
349	IFT88_KAN627-14_5.tif:0002-0164	1.288	173.99	0	894	71.511	18.684	0.962	224.138	17399	1.19	0.841	0.962	1.00937
350	IFT88_KAN627-14_5.tif:0003-0164	0.631	179.102	16	508	12.088	18.671	0.935	113.055	8776	1	1	1	0.509124
351	IFT88_KAN627-14_5.tif:0004-0178	1.52	175.415	0	1369	9.392	20.263	0.883	266.65	20699	1.425	0.702	0.933	1.20082
352	IFT88_KAN627-14_5.tif:0005-0221	0.721	215.143	0	1348	37.966	25.084	0.92	155.205	12048	1.143	0.875	1	0.698943
353	IFT88_KAN627-14_5.tif:0006-0266	0.812	195.302	0	618	114.982	30.197	0.937	158.503	12304	1.039	0.963	0.992	0.713794
354	IFT88_KAN627-14_5.tif:0007-0353	1.456	236.77	0	1152	49.919	40.118	0.881	344.665	26755	1.296	0.772	0.942	1.55214
355	IFT88_KAN627-14_5.tif:0008-0410	1.688	163.305	0	980	101.496	46.575	0.823	275.59	21393	1.86	0.538	0.963	1.24108
356	IFT88_KAN627-14_5.tif:0009-0414	0.979	195.289	0	886	103.844	46.999	0.939	191.198	14842	1.302	0.768	0.974	0.861032
357	IFT88_KAN627-14_5.tif:0010-0445	1.172	104.484	0	574	5.121	50.558	0.796	122.484	9508	1.833	0.546	0.933	0.551589
358	IFT88_KAN627-14_5.tif:0011-0549	0.928	162.167	0	566	71.221	62.348	0.923	150.413	11676	1.198	0.834	0.947	0.677362
359	IFT88_KAN627-14_5.tif:0012-0652	0.915	32.577	0	164	110.722	74.072	0.982	29.797	2313	1.238	0.807	0.947	0.134185
360	IFT88_KAN627-14_5.tif:0013-0681	1.147	137.112	0	812	39.617	77.269	0.927	157.202	12203	1.119	0.894	0.952	0.707935
361	IFT88_KAN627-14_5.tif:0014-0793	1.056	192.537	0	815	21.321	90.007	0.928	203.385	15788	1.13	0.885	0.959	0.915912
362	IFT88_KAN627-14_5.tif:0015-0845	1.765	161.423	0	1114	84.61	95.936	0.861	284.891	22115	1.376	0.727	0.948	1.28296
363	IFT88_KAN627-14_5.tif:0016-0936	1.649	150.289	0	727	110.672	106.326	0.895	247.816	19237	1.483	0.674	0.931	1.116
364	IFT88_KAN627-14_5.tif:0017-1054	0.966	162.853	0	655	42.696	119.598	0.893	157.344	12214	1.268	0.789	0.974	0.708573
365	IFT88_KAN627-14_5.tif:0018-1080	1.043	111.457	0	513	120.053	122.582	0.755	116.301	9028	1.665	0.601	0.848	0.523743
366	IFT88_KAN627-14_5.tif:0019-1189	0.721	207.625	0	521	143.748	134.952	0.92	149.782	11627	1.143	0.875	1	0.674519
										12834.5				0.744568
														0
														0
														0
367	IFT88_KAN627-15_1.tif:0001-0094	1.829	286.035	0	835	31.511	10.671	0.941	523.238	40617	1.281	0.781	0.969	2.35632
368	IFT88_KAN627-15_1.tif:0002-0116	0.605	80.298	0	242	67.831	13.223	0.985	48.618	3774	1.002	0.998	0.979	0.218942
369	IFT88_KAN627-15_1.tif:0003-0118	1.546	101.45	0	390	123.741	13.415	0.909	156.829	12174	1.147	0.872	0.96	0.706253
370	IFT88_KAN627-15_1.tif:0004-0159	0.747	87.897	0	249	12.385	18.035	0.936	65.674	5098	1.077	0.928	0.951	0.295751
371	IFT88_KAN627-15_1.tif:0005-0165	1.043	112.395	0	284	37.405	18.732	0.95	117.28	9104	1.398	0.716	0.97	0.528152
372	IFT88_KAN627-15_1.tif:0006-0323	0.979	105.724	0	275	57.079	36.716	0.959	103.509	8035	1.364	0.733	0.938	0.466136
373	IFT88_KAN627-15_1.tif:0007-0341	0.631	91.612	0	284	76.912	38.686	0.918	57.828	4489	1.368	0.731	0.942	0.260421
374	IFT88_KAN627-15_1.tif:0008-0376	0.451	66.086	0	121	15.087	42.684	0.991	29.797	2313	1.065	0.939	0.986	0.134185
375	IFT88_KAN627-15_1.tif:0009-0422	0.953	127.054	0	324	88.55	47.978	0.948	121.119	9402	1.127	0.887	0.974	0.54544
376	IFT88_KAN627-15_1.tif:0010-0546	0.322	104.8	13	225	32.177	62.028	1	33.752	2620	1	1	1	0.151995
377	IFT88_KAN627-15_1.tif:0011-0586	0.928	53.014	0	122	75.189	66.561	0.996	49.172	3817	1.09	0.918	0.954	0.221436
378	IFT88_KAN627-15_1.tif:0012-0781	0.94	98.37	0	284	141.106	88.713	1	92.507	7181	1.016	0.984	0.961	0.416593
379	IFT88_KAN627-15_1.tif:0013-0794	1.237	127.135	0	420	101.597	90.138	0.924	157.228	12205	1.148	0.871	0.941	0.708051
380	IFT88_KAN627-15_1.tif:0014-0872	0.786	102.934	9	285	55.298	99.012	0.825	80.888	6279	1.9	0.526	0.961	0.364265
381	IFT88_KAN627-15_1.tif:0015-0922	1.134	103.602	0	333	89.675	104.7	0.875	117.447	9117	1.419	0.705	0.921	0.528906
382	IFT88_KAN627-15_1.tif:0016-0984	0.593	112.261	22	217	137.399	111.733	1	66.524	5164	1.052	0.95	0.968	0.29958
383	IFT88_KAN627-15_1.tif:0017-1044	0.876	87.456	0	232	30.532	118.562	0.956	76.611	5947	1.149	0.87	0.971	0.345004
384	IFT88_KAN627-15_1.tif:0018-1133	0.528	100.561	10	257	36.028	128.602	0.968	53.114	4123	1.176	0.85	0.988	0.239188
385	IFT88_KAN627-15_1.tif:0019-1156	0.593	37.717	0	73	70.496	131.191	0.92	22.351	1735	1.363	0.734	0.979	0.100653
386	IFT88_KAN627-15_1.tif:0020-1210	0.438	34.824	0	87	139.151	137.335	1	15.253	1184	1.141	0.876	0.971	0.0686876
387	IFT88_KAN627-15_1.tif:0021-1226	0.605	61.638	0	155	104.59	139.208	0.985	37.32	2897	1.104	0.906	0.979	0.168064
388	IFT88_KAN627-15_2.tif:0001-0047	0.85	23.333	0	105	107.237	5.39	0.965	19.839	1540	1.136	0.88	0.964	0.0893403
389	IFT88_KAN627-15_2.tif:0002-0136	0.966	54.56	0	165	8.394	15.429	0.961	52.714	4092	1.244	0.804	0.968	0.23739
390	IFT88_KAN627-15_2.tif:0003-0214	0.837	118.785	0	465	89.715	24.272	0.99	99.464	7721	1.136	0.88	0.956	0.44792
391	IFT88_KAN627-15_2.tif:0004-0244	0.322	104.68	0	301	134.214	27.751	1	33.713	2617	1	1	1	0.151821
392	IFT88_KAN627-15_2.tif:0005-0412	0.876	56.897	0	249	114.817	46.772	0.956	49.841	3869	1.189	0.841	0.978	0.224453
393	IFT88_KAN627-15_2.tif:0006-0526	0.605	12.681	0	78	142.627	59.758	0.985	7.678	596	1.002	0.998	0.979	0.0345759
394	IFT88_KAN627-15_2.tif:0007-0532	0.605	77.021	0	306	14.812	60.439	0.985	46.634	3620	1.104	0.906	0.979	0.210008
395	IFT88_KAN627-15_2.tif:0008-0595	0.747	60.052	0	193	42.572	67.521	0.977	44.869	3483	1.229	0.814	0.959	0.20206
396	IFT88_KAN627-15_2.tif:0009-0705	1.378	90.86	0	380	32.495	80.039	0.757	125.241	9722	1.606	0.623	0.866	0.564004
397	IFT88_KAN627-15_2.tif:0010-0710	1.198	59.269	0	260	19.906	80.582	0.924	71.007	5512	1.362	0.734	0.939	0.319769
398	IFT88_KAN627-15_2.tif:0011-0751	1.7	117.333	0	553	112.762	85.245	0.851	199.52	15488	1.669	0.599	0.943	0.898508
399	IFT88_KAN627-15_2.tif:0012-0761	1.211	124.351	0	377	89.083	86.353	0.788	150.581	11689	1.612	0.62	0.879	0.678116
400	IFT88_KAN627-15_2.tif:0013-0852	0.876	54.368	0	251	73.82	96.69	0.956	47.626	3697	1.132	0.883	0.971	0.214475
401	IFT88_KAN627-15_2.tif:0014-0950	1.327	92.155	0	380	136.177	107.853	0.803	122.278	9492	1.5	0.667	0.888	0.550661
402	IFT88_KAN627-15_2.tif:0015-0961	1.855	840.653	0	7379	3.477	109.066	0.954	1559.45	121054	1.098	0.91	0.97	7.02273
403	IFT88_KAN627-15_2.tif:0016-1093	0.683	91.264	0	236	54.372	124.106	0.949	62.311	4837	1.208	0.828	0.972	0.28061
404	IFT88_KAN627-15_2.tif:0017-1179	0.528	61.024	0	193	14.067	133.865	0.968	32.231	2502	1.176	0.85	0.988	0.145149
405	IFT88_KAN627-15_2.tif:0018-1194	0.515	20.225	0	58	138.3	135.519	0.994	10.422	809	1.209	0.827	0.976	0.0469327
406	IFT88_KAN627-15_2.tif:0019-1220	0.812	43.81	0	165	86.935	138.476	0.937	35.555	2760	1.039	0.963	0.992	0.160116
407	IFT88_KAN627-15_2.tif:0020-1236	0.915	32.338	0	124	43.425	140.324	0.982	29.578	2296	1.233	0.811	0.953	0.133198
408	IFT88_KAN627-15_3.tif:0001-0115	0.837	85.354	0	349	117.119	13.039	0.865	71.471	5548	1.608	0.622	0.909	0.321857
409	IFT88_KAN627-15_3.tif:0002-0117	0.747	33.897	0	111	48.361	13.28	0.977	25.327	1966	1.142	0.876	0.951	0.114054
410	IFT88_KAN627-15_3.tif:0003-0163	0.812	277.794	0	1590	140.961	18.507	0.937	225.452	17501	1.039	0.963	0.992	1.01529
411	IFT88_KAN627-15_3.tif:0004-0241	0.696	44.778	0	231	75.875	27.339	0.967	31.149	2418	1.139	0.878	0.982	0.140276
412	IFT88_KAN627-15_3.tif:0005-0247	0.631	208.898	0	915	87.225	28.091	0.935	131.863	10236	1	1	1	0.593823
413	IFT88_KAN627-15_3.tif:0006-0296	1.005	69.231	0	303	63.86	33.669	0.929	69.564	5400	1.086	0.921	0.987	0.313271
414	IFT88_KAN627-15_3.tif:0007-0424	1.043	66.099	0	229	88.183	48.118	0.936	68.972	5354	1.197	0.835	0.915	0.310603
415	IFT88_KAN627-15_3.tif:0008-0500	1.378	108.682	0	366	14.063	56.796	0.672	149.808	11629	1.91	0.524	0.82	0.674635
416	IFT88_KAN627-15_3.tif:0009-0546	0.618	90.354	0	230	64.291	62.035	0.96	55.87	4337	1.049	0.953	0.99	0.251603
417	IFT88_KAN627-15_3.tif:0010-0623	1.623	145.476	0	510	137.037	70.701	0.858	236.132	18330	1.481	0.675	0.913	1.06338
418	IFT88_KAN627-15_3.tif:0011-0677	1.237	518.104	0	4222	65.252	76.838	0.936	640.737	49738	1.049	0.953	0.98	2.88546
419	IFT88_KAN627-15_3.tif:0012-0682	1.7	554.083	0	4828	136.207	77.398	0.961	942.195	73139	1.134	0.882	0.971	4.24303
420	IFT88_KAN627-15_3.tif:0013-0707	0.863	45.373	0	147	44.53	80.24	0.98	39.162	3040	1.159	0.863	0.971	0.17636
421	IFT88_KAN627-15_3.tif:0014-0744	0.541	89.571	0	226	77.748	84.501	0.943	48.463	3762	1.167	0.857	1	0.218246
422	IFT88_KAN627-15_3.tif:0015-0796	0.709	20.673	0	65	17.303	90.353	0.943	14.647	1137	1.15	0.87	0.991	0.065961
423	IFT88_KAN627-15_3.tif:0016-0892	0.593	104.63	0	294	59.511	101.318	0.964	62.002	4813	1.136	0.88	0.979	0.279218
424	IFT88_KAN627-15_3.tif:0017-1072	1.056	135.902	0	408	106.452	121.737	0.928	143.56	11144	1.266	0.79	0.959	0.646499
425	IFT88_KAN627-15_4.tif:0001-0059	1.018	64.405	0	234	14.332	6.733	0.835	65.545	5088	1.759	0.568	0.975	0.295171
426	IFT88_KAN627-15_4.tif:0002-0136	1.185	63.348	0	238	57.982	15.517	0.945	75.078	5828	1.165	0.859	0.934	0.338101
427	IFT88_KAN627-15_4.tif:0003-0228	0.76	50.797	0	129	121.265	25.948	0.953	38.608	2997	1.329	0.752	0.975	0.173866
428	IFT88_KAN627-15_4.tif:0004-0262	0.889	102.986	0	301	76.551	29.731	0.933	91.541	7106	1.172	0.853	0.979	0.412242
429	IFT88_KAN627-15_4.tif:0005-0399	0.94	57.945	0	156	54.991	45.332	0.972	54.492	4230	1.173	0.852	0.954	0.245396
430	IFT88_KAN627-15_4.tif:0006-0487	0.58	62.333	0	124	1.923	55.268	0.943	36.135	2805	1.388	0.72	0.968	0.162727
431	IFT88_KAN627-15_4.tif:0007-0669	0.786	92.508	0	384	19.88	75.998	0.892	72.695	5643	1.429	0.7	0.924	0.327368
432	IFT88_KAN627-15_4.tif:0008-0718	0.721	331.804	0	1939	43.698	81.55	0.92	239.365	18581	1.143	0.875	1	1.07794
433	IFT88_KAN627-15_4.tif:0009-0789	0.464	114.25	0	220	54.253	89.552	0.965	52.985	4113	1	1	1	0.238608
434	IFT88_KAN627-15_4.tif:0010-0817	1.739	494.852	0	4010	126.215	92.725	0.955	860.599	66805	1.083	0.923	0.975	3.87557
435	IFT88_KAN627-15_4.tif:0011-0853	0.58	47.444	0	222	80.642	96.872	1	27.504	2135	1	1	0.957	0.123858
436	IFT88_KAN627-15_4.tif:0012-1073	1.108	53.895	0	206	100.88	121.786	0.671	59.709	4635	2.081	0.481	0.804	0.268891
437	IFT88_KAN627-15_4.tif:0013-1179	0.593	85.652	0	270	39.498	133.817	0.964	50.756	3940	1.351	0.74	0.979	0.228572
438	IFT88_KAN627-15_4.tif:0014-1237	1.829	313.585	0	1910	38.945	140.449	0.966	573.634	44529	1.104	0.906	0.969	2.58327
439	IFT88_KAN627-15_4.tif:0015-1255	0.631	192.531	0	933	119.913	142.499	0.935	121.531	9434	1	1	1	0.547296
										10849.8				0.629429
440	IFT88_KAN627-16_1.tif:0001-0050	0.631	183.918	22	347	11.293	5.732	0.935	116.095	9012	1	1	1	0.522815
441	IFT88_KAN627-16_1.tif:0002-0083	0.992	216.961	0	771	70.881	9.467	0.951	215.211	16706	1.06	0.944	0.975	0.969168
442	IFT88_KAN627-16_1.tif:0003-0155	1.056	176.61	0	700	55.124	17.615	0.962	186.561	14482	1.091	0.916	0.953	0.840147
443	IFT88_KAN627-16_1.tif:0004-0208	1.34	148.442	0	753	22.665	23.682	0.811	198.876	15438	1.56	0.641	0.904	0.895608
444	IFT88_KAN627-16_1.tif:0005-0283	1.043	123.506	0	534	98.353	32.18	0.873	128.874	10004	1.59	0.629	0.915	0.580364
445	IFT88_KAN627-16_1.tif:0006-0395	1.469	168.833	0	834	105.603	44.819	0.916	247.945	19247	1.211	0.826	0.938	1.11658
446	IFT88_KAN627-16_1.tif:0007-0536	1.288	178.64	0	741	129.341	60.932	0.838	230.129	17864	1.553	0.644	0.926	1.03635
447	IFT88_KAN627-16_1.tif:0008-0539	0.618	45.521	0	159	22.019	61.233	0.702	28.148	2185	2.004	0.499	0.8	0.126759
448	IFT88_KAN627-16_1.tif:0009-0613	1.559	137.893	0	729	92.162	69.547	0.88	214.94	16685	1.446	0.691	0.942	0.96795
449	IFT88_KAN627-16_1.tif:0010-0917	0.438	14.765	0	51	29.056	104.08	1	6.467	502	1.141	0.876	0.971	0.0291226
450	IFT88_KAN627-16_1.tif:0011-0958	1.018	203.266	0	883	80.086	108.79	0.941	206.863	16058	1.001	0.999	0.988	0.931576
451	IFT88_KAN627-16_1.tif:0012-1146	0.721	197.518	29	491	114.919	130.071	0.92	142.491	11061	1.143	0.875	1	0.641684
452	IFT88_KAN627-16_2.tif:0001-0086	1.005	205.256	0	842	62.488	9.824	0.963	206.245	16010	1.032	0.969	0.981	0.928791
453	IFT88_KAN627-16_2.tif:0002-0119	1.623	136.087	0	593	92.929	13.515	0.813	220.892	17147	1.395	0.717	0.894	0.994752
454	IFT88_KAN627-16_2.tif:0003-0163	1.791	116.302	0	750	18.153	18.495	0.842	208.254	16166	1.411	0.709	0.917	0.937841
455	IFT88_KAN627-16_2.tif:0004-0187	1.069	126.952	0	463	133.404	21.237	0.908	135.74	10537	1.227	0.815	0.965	0.611285
456	IFT88_KAN627-16_2.tif:0005-0245	0.683	46.132	0	178	120.87	27.871	0.993	31.497	2445	1.148	0.871	0.972	0.141842
457	IFT88_KAN627-16_2.tif:0006-0300	1.456	147.336	0	860	12.327	34.157	0.71	214.477	16649	1.735	0.576	0.846	0.965862
458	IFT88_KAN627-16_2.tif:0007-0301	0.928	265.528	0	1324	27.921	34.22	0.903	246.283	19118	1.125	0.889	1	1.1091
459	IFT88_KAN627-16_2.tif:0008-0360	1.443	137.143	0	669	96.308	40.9	0.911	197.871	15360	1.443	0.693	0.982	0.891083
460	IFT88_KAN627-16_2.tif:0009-0374	1.301	137.277	0	538	81.51	42.561	0.821	178.612	13865	1.672	0.598	0.931	0.804353
461	IFT88_KAN627-16_2.tif:0010-0408	1.018	141.519	0	492	58.167	46.303	0.835	144.024	11180	1.546	0.647	0.946	0.648588
462	IFT88_KAN627-16_2.tif:0011-0410	0.386	209.3	27	352	35.753	46.592	0.976	80.888	6279	1.2	0.833	1	0.364265
463	IFT88_KAN627-16_2.tif:0012-0494	0.631	164.408	8	430	127.744	56.126	0.935	103.779	8056	1	1	1	0.467354
464	IFT88_KAN627-16_2.tif:0013-0503	0.631	213.592	0	1097	10.385	57.147	0.935	134.826	10466	1	1	1	0.607166
465	IFT88_KAN627-16_2.tif:0014-0681	1.275	143.01	0	460	92.532	77.249	0.894	182.387	14158	1.381	0.724	0.971	0.821351
466	IFT88_KAN627-16_2.tif:0015-0777	1.224	151.905	0	445	33.305	88.176	0.846	185.904	14431	1.457	0.686	0.9	0.837188
467	IFT88_KAN627-16_2.tif:0016-0853	0.451	54.371	4	134	8.796	96.872	0.938	24.515	1903	1.4	0.714	1	0.110399
468	IFT88_KAN627-16_2.tif:0017-0891	0.721	142.268	0	482	62.482	101.129	0.92	102.633	7967	1.143	0.875	1	0.462191
469	IFT88_KAN627-16_2.tif:0018-0935	0.928	177.681	1	685	129.934	106.157	0.923	164.803	12793	1.337	0.748	0.96	0.742163
470	IFT88_KAN627-16_2.tif:0019-0954	1.005	181.962	0	699	47.497	108.289	0.883	182.838	14193	1.276	0.783	0.929	0.823381
471	IFT88_KAN627-16_2.tif:0020-0959	0.322	249.88	126	400	121.048	108.903	1	80.475	6247	1	1	1	0.362408
472	IFT88_KAN627-16_2.tif:0021-1031	0.631	192.184	11	576	98.348	117.075	0.935	121.312	9417	1	1	1	0.54631
473	IFT88_KAN627-16_2.tif:0022-1083	1.005	207.179	1	583	67.873	122.921	0.929	208.177	16160	1.259	0.794	0.987	0.937493
474	IFT88_KAN627-16_3.tif:0001-0135	1.25	158.536	0	580	121.757	15.306	0.849	198.103	15378	1.656	0.604	0.97	0.892127
475	IFT88_KAN627-16_3.tif:0002-0253	1.005	190.256	0	845	131.836	28.778	0.963	191.173	14840	1.032	0.969	0.981	0.860916
476	IFT88_KAN627-16_3.tif:0003-0307	0.721	193.321	3	626	70.597	34.901	0.92	139.463	10826	1.143	0.875	1	0.628051
477	IFT88_KAN627-16_3.tif:0004-0355	1.134	185.341	0	801	15.375	40.295	0.887	210.11	16310	1.254	0.798	0.957	0.946195
478	IFT88_KAN627-16_3.tif:0005-0421	0.85	151.273	0	555	31.269	47.756	0.892	128.616	9984	1.435	0.697	0.971	0.579204
479	IFT88_KAN627-16_3.tif:0006-0463	1.056	162.988	0	636	120.645	52.61	0.897	172.171	13365	1.258	0.795	0.953	0.775346
480	IFT88_KAN627-16_3.tif:0007-0470	0.979	177.474	0	711	72.259	53.388	0.939	173.756	13488	1.148	0.871	0.974	0.782482
481	IFT88_KAN627-16_3.tif:0008-0528	0.451	12.4	0	94	135.981	59.92	0.991	5.591	434	1.065	0.939	0.986	0.0251777
482	IFT88_KAN627-16_3.tif:0009-0639	1.353	202.657	0	1000	99.13	72.585	0.907	274.121	21279	1.177	0.849	0.942	1.23446
483	IFT88_KAN627-16_3.tif:0010-0718	0.605	52.766	4	115	24.636	81.485	0.94	31.948	2480	1.336	0.748	0.989	0.143873
484	IFT88_KAN627-16_3.tif:0011-0845	1.147	150.685	0	600	12.887	95.954	0.868	172.764	13411	1.353	0.739	0.952	0.778015
485	IFT88_KAN627-16_3.tif:0012-0879	0.876	162.662	0	526	129.278	99.798	0.919	142.491	11061	1.117	0.895	0.971	0.641684
486	IFT88_KAN627-16_3.tif:0013-0904	0.721	167.929	0	495	60.439	102.604	0.92	121.145	9404	1.143	0.875	1	0.545556
487	IFT88_KAN627-16_3.tif:0014-0960	0.67	118.25	0	366	54.083	108.96	0.932	79.213	6149	1.508	0.663	0.981	0.356723
488	IFT88_KAN627-16_4.tif:0001-0255	1.147	155.303	0	779	114.416	28.97	0.927	178.058	13822	1.206	0.829	0.957	0.801858
489	IFT88_KAN627-16_4.tif:0002-0319	1.494	132.078	0	628	19.336	36.17	0.854	197.369	15321	1.6	0.625	0.963	0.88882
490	IFT88_KAN627-16_4.tif:0003-0411	1.481	146.191	0	890	28.398	46.696	0.742	216.576	16812	1.743	0.574	0.878	0.975318
491	IFT88_KAN627-16_4.tif:0004-0596	0.902	192.743	0	703	78.599	67.635	0.947	173.807	13492	1.125	0.889	0.986	0.782714
492	IFT88_KAN627-16_4.tif:0005-0697	0.721	166.411	0	468	140.059	79.166	0.92	120.05	9319	1.143	0.875	1	0.540625
493	IFT88_KAN627-16_4.tif:0006-0734	2.345	1863.37	0	15904	21.854	83.352	0.944	4368.81	339134	1.081	0.925	0.958	19.6742
494	IFT88_KAN627-16_4.tif:0007-0757	0.876	78.015	0	505	66.95	85.913	0.905	68.34	5305	1.392	0.718	0.919	0.30776
495	IFT88_KAN627-16_4.tif:0008-0774	1.043	139.012	0	656	40.701	87.822	0.95	145.054	11260	1.119	0.893	0.953	0.653229
496	IFT88_KAN627-16_4.tif:0009-0915	0.979	125.947	0	542	83.98	103.872	0.831	123.309	9572	1.357	0.737	0.916	0.555302
497	IFT88_KAN627-16_4.tif:0010-0923	0.979	73.408	0	481	112.392	104.755	0.924	71.87	5579	1.396	0.716	0.933	0.323656
498	IFT88_KAN627-16_4.tif:0011-1130	1.121	105.678	0	444	47.214	128.279	0.877	118.439	9194	1.594	0.627	0.951	0.533373
										17237.5				1

## Sheet: Post ROUT
	sgSafe	CEP164 KO	CEP83 KO	SCLT1 KO	FBF1 KO	CEP89 KO	CCDC92 KO	ANKRD26 KO	TTBK2 KO	INPP5E KO	KIZ KO	LRRC45 KO
	0.522815	0.0817406	0.026454	0.0847573	0.918117	0.571604	0.372909	0.00986224	0.0232633	0.727369	0.773258	0.715129
	0.969168	0.0708341	0.0889922	0.170037	0.520204	1.23237	0.582627	0.373779	0.0555186	1.05352	0.941148	0.277129
	0.840147	0.112488	0.170385	0.043742	0.762293	0.786659	0.545208	0.123626	0.0739668	1.70309	0.0563888	0.578624
	0.895608	0.124612	0.0523279	0.0664831	0.717681	0.6342	1.15417	0.510574	0.0302249	1.21369	1.22942	1.06808
	0.580364	0.125076	0.214475	0.155069	0.19127	0.101291	0.838059	0.617841	0.00939814	0.626949	0.0682235	1.52813
	1.11658	0.11301	0.113416	0.0664831	0.812359	0.918059	0.655723	0.316694	0.0374765	0.570386	0.780394	0.312807
	1.03635	0.0628863	0.0617841	0.331893	0.359682	0.102509	0.927051	0.567195		0.502742	0.576709	0.158492
	0.126759	0.0200145	0.230835	0.165976	0.995796	0.808762	1.20667	0.469733	0.0778537	1.4081	1.06936	0.62312
	0.96795	0.0216969	0.1238	0.0565049	0.312111	0.82779	0.769835	0.467296	0.0584773	0.661582	0.574679	0.521017
	0.0291226	0.0413054	0.074779	0.0938073	0.719074	1.06216	1.07174	1.07789	0.0191444	0.933664	0.457434	0.334214
	0.931576	0.0537782	0.0502394		0.445425	0.845716		0.647891	0.0846993	0.637681	0.563598	0.658508
	0.641684	0.129253	0.0241335	0.401277	0.571488		1.29178	0.885455	0.0156055	0.612097	0.516027	0.859524
	0.928791	0.0242495	0.148282	0.0535462	0.619581	0.952461	1.03815	0.853142	0.125947	0.523801	0.589008	0.393097
	0.994752	0.0683395	0.0496593	0.01752	0.92473	1.08421	0.6418	0.510458	0.039391	1.51449	0.584309	0.620451
	0.937841	0.0428718	0.127687	0.159594	0.0324294	0.985528	1.0429	0.361828	0.0463525	0.466948	0.636115	0.245512
	0.611285	0.048325		0.427557	0.707529	1.04372	0.0812185	0.452271	0.0695578	0.369776	0.508428	0.377376
	0.141842	0.0367224	0.026222	0.108427	0.0933432	0.653287	0.647775	0.175026	0.0400871	0.946601	1.20128	0.469211
	0.965862	0.0670052	0.166672	0.118927	0.994694	0.384047	0.804701	0.192256	0.021929	0.128789	0.396636	1.27258
	1.1091	0.0479769	0.318318	0.265991	0.203568	1.37103	0.548921	0.253402		0.850009	0.821119	0.138303
	0.891083	0.0954897	0.135751	0.151008		0.85088	0.768153	0.649806		0.7837	0.938189	0.585179
	0.804353	0.0365483	0.0673533		0.765542	0.167832	0.122408	0.164525		0.831561	0.779291	0.0942714
	0.648588			0.0939814	0.717855	0.177636	0.524613	0.566963		0.598638	1.32235	0.136621
	0.364265	0.116142	0.10512	0.0605658	0.623294	0.722786	0.675506	0.740074		0.0487311	0.643772	0.410269
	0.467354	0.0925311	0.110283	0.15095	0.658682	1.13572	0.416013	0.595331		0.90431	1.0436	0.625498
	0.607166	0.158724	0.0324874	0.0641626	0.555592	0.946253	0.165512	0.0420015		0.448732	0.424947	0.565803
	0.821351	0.105468	0.118521	0.114054	0.566557	0.514345	0.0981583	0.96035		0.611401	0.743845	0.169863
	0.837188	0.0145033	0.212328	0.0675274	0.507209	0.827964	0.171487	0.710198		0.927457	0.568297	0.88795
	0.110399	0.0273822		0.217666	0.59098	0.716115	1.48885	0.14277		0.0847573	0.746862	0.570038
	0.462191	0.0375345	0.057375	0.132444	0.561046	0.82837	0.27243	0.538711		0.671039	0.53581	0.0958378
	0.742163	0.0498914	0.114924	0.035214	0.670865	0.745818	0.809574	1.58509		0.889632	1.3238	0.111791
	0.823381	0.130646	0.14805	0.0852794	0.504135	0.7113		0.817754		0.738624	0.634838	0.0113126
	0.362408	0.0669472	0.0827848	0.298768	0.976768	0.949908	1.17013	0.767108			1.08496	0.608442
	0.54631	0.155823	0.0390429	0.0974622	0.660538	0.718958	0.684034	0.293547		1.30466	0.445251	0.675796
	0.937493	0.0506455	0.235824	0.232053	0.0647427	0.169573	0.646151	0.899553			1.12795	0.528616
	0.892127		0.138129	0.0632924	0.2114	0.531401	0.681191	0.611169		0.0209428	1.19159	0.0531401
	0.860916	0.114634	0.209776	0.116142	0.655259	0.802903	0.668138	0.579842		0.892185	0.708341	0.751909
	0.628051	0.104366	0.0507035	0.0428718	0.8608	0.569283	0.0895144	0.502336		0.610821	0.636463	0.738102
	0.946195	0.034982	0.169224		0.657057	0.712808	0.461727	0.448558		0.155997	0.449718	0.51185
	0.579204	0.0509356	0.171777	0.248761	0.762293	0.960757	0.595099	0.827964		0.538827	0.524671	1.00752
	0.775346		0.0706601	0.0209428	0.48325	0.852736	0.456564	0.459697		0.502046	0.877566	0.679567
	0.782482	0.0779117	0.0585353	0.0823207	0.0725745	0.846006	0.535404	0.742047		0.840147	0.670168	0.952519
	0.0251777	0.125831	0.170385	0.262742	0.876811	0.909009	0.616738	0.0577231		0.892591	0.124148	0.554606
	1.23446	0.096824	0.0620161		0.681307	0.84299	1.72589	0.389733		0.0764034	0.505353	0.463699
	0.143873	0.0538943		0.161625	0.833244	1.05538	0.596086	0.582046		0.264656	0.496303	0.521829
	0.778015	0.0798262	0.124032		0.604033	0.992316	1.0143	0.148456		0.780452	0.356665	0.888414
	0.641684	0.0754172	0.13401		0.0380567	1.01221	0.890561	0.517188		0.606064		0.652242
	0.545556	0.0136331	0.0403772		0.602061	0.686992	0.833766	0.746978		0.560523		0.599682
	0.356723	0.0761713	0.11214			0.972881	0.71043	0.254678		0.504077		1.00606
	0.801858	0.0455984				0.606122	0.859756	0.269877		0.0211748		0.936391
	0.88882	0.0274402	0.131342			1.32218		0.621785		0.691169		0.0462365
	0.975318	0.0912548	0.0165338			0.568703	0.52618	0.773084		0.313503		0.135519
	0.782714		0.0237854			0.351096	0.119971	0.6342		0.328993		0.990865
	0.540625	0.0708921	0.00562728			0.804005	0.678348	0.528036		0.459987		1.00543
		0.0683976	0.132212			0.10686	1.01981	0.234663		0.58222		0.0964179
	0.30776	0.0433939	0.116549			0.396926	0.704976	0.426571		0.633272		0.618653
	0.653229					0.701612	0.870952	0.454127				0.697493
	0.555302	0.0418275	0.200146			0.659494	1.08409	0.818044		1.39313		0.956638
	0.323656	0.144511	0.0255258			0.0537202	0.509704	0.175316		0.503032		1.45352
	0.533373		0.143467			0.482148	0.738276	0.598058				0.49433
		0.0226252	0.114402			0.218304	0.633388	0.676956		1.04476		0.555708
		0.0446122	0.105874			1.13555	0.81729	0.0840031		0.904078		0.575839
		0.0207107	0.10367			0.908487	0.562902	1.1381		0.832199		0.536448
		0.118695				0.958726		0.662917		0.201886		0.557681
		0.146541				1.94744	0.200262	0.645281		1.38008		0.0945615
		0.0105584	0.0936333			0.0254678	0.989763	0.893519		0.650096
		0.0978103	0.0776797			0.0821467	0.554432	0.262916		0.975318
		0.048209	0.0319653			0.760901	0.462597	0.809342		1.39232
		0.0563888	0.159188			0.0706601	0.0105584	1.01581		0.955651
		0.0608558	0.133836			0.906224		0.597594		0.493402
		0.119391	0.0234373			1.00218		1.09442		0.735433
		0.0756492				0.524497		0.61523		0.568877
		0.0323133				0.350632		0.485338		0.101813
		0.0360842				1.30135		0.558493		1.08519
		0.0447862				0.300508		0.113706		0.573925
		0.0292967				0.69349		0.670865		0.593591
						0.674809		0.682235		0.574389
						0.560582		0.904658		0.917827
						1.01047		0.737696		0.725397
						0.0408993		0.635361		1.07394
						0.869212		0.537724		0.584251
						0.313329		1.0103		0.829415
						0.436955		0.707819		0.818682
						0.678812		0.700219		0.677246
								1.23771		0.658856
								1.35931		0.609429
								0.958436		0.712518
								0.149384		0.592779
								0.71101		0.136099
								0.0327194		1.00514
								0.698595		0.731372
								0.873621		0.438174
								0.0453083		0.452967
										0.960408
										0.738566
	0.67803	0.0700396	0.107725	0.139686	0.579638	0.708793	0.678952	0.576617	0.0487584	0.691031

## Sheet: IF condition
Exp. number	Cell line	Culture condition	Fixation condition	rabbit-Alexa488	mouse IgG1-Alexa568	mouse IgG2b-Alexa647	Nuclear stain	Date	Replicate
KAN627-1	RPE-BFP-Cas9 pMCB306 (pool)		serum starved for 24 hours, fixed in 4% PFA at RT for 15 mintues	IFT88, Proteintech, 13967-1-AP, 1:1000	CEP170, Invitrogen, 41-3200, 1:1000	Ac-Tub, 6B-11, Santa Cruz, 1:1000	DAPI	No.6	2021-03-10
KAN627-2	RPE-BFP-Cas9 CEP164KO (pool)		serum starved for 24 hours, fixed in 4% PFA at RT for 15 mintues	IFT88, Proteintech, 13967-1-AP, 1:1000	CEP170, Invitrogen, 41-3200, 1:1000	Ac-Tub, 6B-11, Santa Cruz, 1:1000	DAPI	No.6	2021-03-10
KAN627-3	RPE-BFP-Cas9 CEP83 KO (pool)		serum starved for 24 hours, fixed in 4% PFA at RT for 15 mintues	IFT88, Proteintech, 13967-1-AP, 1:1000	CEP170, Invitrogen, 41-3200, 1:1000	Ac-Tub, 6B-11, Santa Cruz, 1:1000	DAPI	No.6	2021-03-10
KAN627-4	RPE-BFP-Cas9 SCLT1 KO (pool)		serum starved for 24 hours, fixed in 4% PFA at RT for 15 mintues	IFT88, Proteintech, 13967-1-AP, 1:1000	CEP170, Invitrogen, 41-3200, 1:1000	Ac-Tub, 6B-11, Santa Cruz, 1:1000	DAPI	No.6	2021-03-10
KAN627-5	RPE-BFP-Cas9 FBF1 KO (pool)		serum starved for 24 hours, fixed in 4% PFA at RT for 15 mintues	IFT88, Proteintech, 13967-1-AP, 1:1000	CEP170, Invitrogen, 41-3200, 1:1000	Ac-Tub, 6B-11, Santa Cruz, 1:1000	DAPI	No.6	2021-03-10
KAN627-6	RPE-BFP-Cas9 CEP89KO (pool)		serum starved for 24 hours, fixed in 4% PFA at RT for 15 mintues	IFT88, Proteintech, 13967-1-AP, 1:1000	CEP170, Invitrogen, 41-3200, 1:1000	Ac-Tub, 6B-11, Santa Cruz, 1:1000	DAPI	No.6	2021-03-10
KAN627-7	RPE-BFP-Cas9 CCDC92 KO (pool)		serum starved for 24 hours, fixed in 4% PFA at RT for 15 mintues	IFT88, Proteintech, 13967-1-AP, 1:1000	CEP170, Invitrogen, 41-3200, 1:1000	Ac-Tub, 6B-11, Santa Cruz, 1:1000	DAPI	No.6	2021-03-10
KAN627-8	RPE-BFP-Cas9 ANKRD26 KO (pool)		serum starved for 24 hours, fixed in 4% PFA at RT for 15 mintues	IFT88, Proteintech, 13967-1-AP, 1:1000	CEP170, Invitrogen, 41-3200, 1:1000	Ac-Tub, 6B-11, Santa Cruz, 1:1000	DAPI	No.6	2021-03-10
KAN627-9	RPE-BFP-Cas9 TTBK2 KO (pool)		serum starved for 24 hours, fixed in 4% PFA at RT for 15 mintues	IFT88, Proteintech, 13967-1-AP, 1:1000	CEP170, Invitrogen, 41-3200, 1:1000	Ac-Tub, 6B-11, Santa Cruz, 1:1000	DAPI	No.6	2021-03-10
KAN627-10	RPE-BFP-Cas9 INPP5E KO (pool)		serum starved for 24 hours, fixed in 4% PFA at RT for 15 mintues	IFT88, Proteintech, 13967-1-AP, 1:1000	CEP170, Invitrogen, 41-3200, 1:1000	Ac-Tub, 6B-11, Santa Cruz, 1:1000	DAPI	No.6	2021-03-10
KAN627-11	RPE-BFP-Cas9 Kiz KO (pool)		serum starved for 24 hours, fixed in 4% PFA at RT for 15 mintues	IFT88, Proteintech, 13967-1-AP, 1:1000	CEP170, Invitrogen, 41-3200, 1:1000	Ac-Tub, 6B-11, Santa Cruz, 1:1000	DAPI	No.6	2021-03-10
KAN627-12	RPE-BFP-Cas9 LRRC45 KO (pool)		serum starved for 24 hours, fixed in 4% PFA at RT for 15 mintues	IFT88, Proteintech, 13967-1-AP, 1:1000	CEP170, Invitrogen, 41-3200, 1:1000	Ac-Tub, 6B-11, Santa Cruz, 1:1000	DAPI	No.6	2021-03-10
KAN627-13	RPE-BFP-Cas9 NCS1 KO (pool)		serum starved for 24 hours, fixed in 4% PFA at RT for 15 mintues	IFT88, Proteintech, 13967-1-AP, 1:1000	CEP170, Invitrogen, 41-3200, 1:1000	Ac-Tub, 6B-11, Santa Cruz, 1:1000	DAPI	No.6	2021-03-10
KAN627-14	RPE-BFP-Cas9 C3orf14 KO (pool)		serum starved for 24 hours, fixed in 4% PFA at RT for 15 mintues	IFT88, Proteintech, 13967-1-AP, 1:1000	CEP170, Invitrogen, 41-3200, 1:1000	Ac-Tub, 6B-11, Santa Cruz, 1:1000	DAPI	No.6	2021-03-10
KAN627-15	RPE-BFP-Cas9 FOP KO (pool)		serum starved for 24 hours, fixed in 4% PFA at RT for 15 mintues	IFT88, Proteintech, 13967-1-AP, 1:1000	CEP170, Invitrogen, 41-3200, 1:1000	Ac-Tub, 6B-11, Santa Cruz, 1:1000	DAPI	No.6	2021-03-10
KAN627-16	RPE-BFP-Cas9 sgSafe (pool)		serum starved for 24 hours, fixed in 4% PFA at RT for 15 mintues	IFT88, Proteintech, 13967-1-AP, 1:1000	CEP170, Invitrogen, 41-3200, 1:1000	Ac-Tub, 6B-11, Santa Cruz, 1:1000	DAPI	No.6	2021-03-10
