# Supplementary material for: A hierarchical pathway for assembly of the distal appendages that organize primary cilia
Source: eLife. 2025 Jan 30;14:e85999. doi: 10.7554/eLife.85999 (PMC11984956; doi:10.7554/eLife.85999)
Supplement: Figure 5—source data 6. [file elife-85999-fig5-data6.xlsx]

## Sheet: Raw data
sgGFP (pMCB306)	Label	Area	Mean	Min	Max	X	Y	Circ	IntDen	RawIntDen	AR	Round	Solidity
616	CEP19_KAN631-1_1.tif:0001-0015	1.121	243.023	0	1171	77.469	1.686	0.919	272.369	21143	1.118	0.895	0.983	0.924611
617	CEP19_KAN631-1_1.tif:0002-0193	1.404	169.725	0	1025	84.289	21.947	0.886	238.322	18500	1.522	0.657	0.969	0.809029
618	CEP19_KAN631-1_1.tif:0003-0272	1.121	196.862	0	848	16.292	30.878	0.951	220.634	17127	1.114	0.897	0.983	0.748986
619	CEP19_KAN631-1_1.tif:0004-0369	0.889	159.348	6	551	35.747	41.933	0.933	141.64	10995	1.172	0.853	0.979	0.480826
620	CEP19_KAN631-1_1.tif:0005-0438	1.005	204.423	0	774	55.161	49.713	0.929	205.408	15945	1.259	0.794	0.987	0.697296
621	CEP19_KAN631-1_1.tif:0006-0504	1.507	120.496	0	662	119.622	57.212	0.666	181.614	14098	1.998	0.501	0.812	0.616524
622	CEP19_KAN631-1_1.tif:0007-0505	1.108	242.314	0	1044	85.068	57.307	0.94	268.453	20839	1.129	0.886	0.977	0.911317
623	CEP19_KAN631-1_1.tif:0008-0543	1.378	176.935	0	1023	107.152	61.628	0.766	243.887	18932	1.972	0.507	0.947	0.827921
624	CEP19_KAN631-1_1.tif:0009-0624	0.915	219.986	0	844	128.715	70.887	0.924	201.208	15619	1.13	0.885	0.993	0.683039
625	CEP19_KAN631-1_1.tif:0010-0774	0.721	169.875	10	504	60.439	87.849	0.92	122.549	9513	1.143	0.875	1	0.416016
626	CEP19_KAN631-1_1.tif:0011-0777	0.902	220.171	0	910	6.98	88.19	0.947	198.541	15412	1.146	0.873	0.986	0.673987
627	CEP19_KAN631-1_1.tif:0012-0801	0.799	174.774	0	707	42.563	90.914	0.96	139.592	10836	1.081	0.925	0.984	0.473873
628	CEP19_KAN631-1_1.tif:0013-0894	0.915	247.479	0	1293	17.36	101.532	0.924	226.354	17571	1.13	0.885	0.993	0.768403
629	CEP19_KAN631-1_1.tif:0014-0917	0.94	160.575	0	583	100.59	104.093	0.936	151.006	11722	1.299	0.77	0.961	0.512618
630	CEP19_KAN631-1_1.tif:0015-1025	0.799	165.839	0	549	110.89	116.338	0.96	132.455	10282	1.081	0.925	0.984	0.449645
631	CEP19_KAN631-1_2.tif:0001-0051	1.417	173.555	0	877	33.566	5.834	0.757	245.935	19091	1.575	0.635	0.87	0.834875
632	CEP19_KAN631-1_2.tif:0002-0073	1.005	280.192	0	1207	122.807	8.286	0.929	281.542	21855	1.259	0.794	0.987	0.955748
633	CEP19_KAN631-1_2.tif:0003-0181	1.095	178.282	0	811	82.235	20.548	0.929	195.218	15154	1.137	0.879	0.971	0.662704
634	CEP19_KAN631-1_2.tif:0004-0196	1.546	142.642	0	757	21.112	22.344	0.826	220.506	17117	1.746	0.573	0.949	0.748549
635	CEP19_KAN631-1_2.tif:0005-0251	1.533	129.664	0	911	132.828	28.518	0.819	198.773	15430	1.514	0.661	0.915	0.674774
636	CEP19_KAN631-1_2.tif:0006-0253	0.812	183.222	0	509	107.024	28.722	0.937	148.7	11543	1.039	0.963	0.992	0.504791
637	CEP19_KAN631-1_2.tif:0007-0343	1.043	161.654	0	649	90.347	38.996	0.95	168.68	13094	1.277	0.783	0.959	0.572618
638	CEP19_KAN631-1_2.tif:0008-0357	1.262	175.163	0	918	49.495	40.565	0.885	221.137	17166	1.418	0.705	0.951	0.750692
639	CEP19_KAN631-1_2.tif:0009-0472	1.507	187.222	0	1211	71.054	53.559	0.735	282.186	21905	1.51	0.662	0.857	0.957934
640	CEP19_KAN631-1_3.tif:0001-0095	1.52	138.008	0	973	8.057	10.859	0.696	209.787	16285	1.905	0.525	0.837	0.712164
641	CEP19_KAN631-1_3.tif:0002-0225	1.314	192.725	0	1075	14.699	25.568	0.892	253.239	19658	1.066	0.938	0.967	0.85967
642	CEP19_KAN631-1_3.tif:0003-0289	1.726	148.433	0	1030	105.254	32.885	0.833	256.228	19890	1.666	0.6	0.915	0.869816
643	CEP19_KAN631-1_3.tif:0004-0339	1.095	256.729	0	1126	84.609	38.483	0.929	281.117	21822	1.15	0.87	0.971	0.954305
644	CEP19_KAN631-1_3.tif:0005-0535	1.069	148.313	0	678	55.836	60.76	0.908	158.581	12310	1.365	0.733	0.971	0.538333
645	CEP19_KAN631-1_3.tif:0006-0626	0.966	238.453	0	1075	130.203	71.055	0.926	230.386	17884	1.244	0.804	0.968	0.782091
646	CEP19_KAN631-1_3.tif:0007-0636	1.559	137.471	0	710	105.222	72.171	0.88	214.283	16634	1.333	0.75	0.931	0.727427
647	CEP19_KAN631-1_3.tif:0008-0906	1.868	114.076	0	1107	89.558	102.844	0.834	213.085	16541	1.658	0.603	0.96	0.72336
648	CEP19_KAN631-1_3.tif:0009-1064	0.889	202.043	0	748	37.79	120.826	0.933	179.591	13941	1.172	0.853	0.979	0.609658
649	CEP19_KAN631-1_3.tif:0010-1076	0.799	62.452	0	381	81.755	122.135	0.984	49.88	3872	1.202	0.832	0.932	0.169328
650	CEP19_KAN631-1_4.tif:0001-0042	1.597	222.065	0	1320	104.102	4.734	0.955	354.726	27536	1.192	0.839	0.95	1.20419
651	CEP19_KAN631-1_4.tif:0002-0068	1.868	170.69	0	1231	74.925	7.784	0.826	318.836	24750	1.317	0.759	0.918	1.08235
652	CEP19_KAN631-1_4.tif:0003-0261	1.469	204.64	0	1247	47.361	29.769	0.83	300.53	23329	1.265	0.791	0.905	1.02021
653	CEP19_KAN631-1_4.tif:0004-0358	1.765	161.657	0	1236	118.722	40.686	0.884	285.303	22147	1.358	0.736	0.945	0.968517
654	CEP19_KAN631-1_4.tif:0005-0396	1.816	303.27	0	2286	86.548	45.006	0.899	550.858	42761	1.223	0.818	0.937	1.86999
655	CEP19_KAN631-1_4.tif:0006-0413	0.979	167.868	0	600	5.57	46.85	0.939	164.352	12758	1.249	0.801	0.981	0.557924
656	CEP19_KAN631-1_4.tif:0007-0444	1.507	124.496	0	750	20.839	50.411	0.886	187.643	14566	1.276	0.784	0.947	0.63699
657	CEP19_KAN631-1_4.tif:0008-0578	1.597	128.161	0	745	49.08	65.69	0.779	204.725	15892	1.896	0.527	0.925	0.694978
658	CEP19_KAN631-1_4.tif:0009-0707	0.799	121.048	4	333	1.703	80.245	0.96	96.681	7505	1.081	0.925	0.984	0.328204
659	CEP19_KAN631-1_4.tif:0010-0738	1.456	178.956	0	924	89.596	83.8	0.964	260.505	20222	1.11	0.901	0.95	0.884335
660	CEP19_KAN631-1_4.tif:0011-0758	1.572	204.689	0	837	126.597	86.089	0.863	321.696	24972	1.448	0.691	0.935	1.09206
661	CEP19_KAN631-1_4.tif:0012-0809	1.301	219.99	0	1348	99.742	91.85	0.884	286.231	22219	1.361	0.735	0.967	0.971666
662	CEP19_KAN631-1_4.tif:0013-0868	1.726	134.604	0	873	111.516	98.57	0.898	232.357	18037	1.245	0.803	0.975	0.788782
663	CEP19_KAN631-1_4.tif:0014-0929	1.185	212.272	0	1177	73.422	105.449	0.897	251.577	19529	1.509	0.663	0.984	0.854029
664	CEP19_KAN631-1_4.tif:0015-1163	1.056	184.293	0	932	70.54	132.001	0.928	194.677	15112	1.268	0.789	0.965	0.660868
										17368.6				0.759551
														0
														0
CEP164 KO														0
665	CEP19_KAN631-2_1.tif:0001-0068	1.031	27.65	0	93	8.334	7.727	0.973	28.496	2212	1.136	0.88	0.952	0.0967337
666	CEP19_KAN631-2_1.tif:0002-0181	0.889	14.319	0	48	136.979	20.618	0.933	12.728	988	1.159	0.863	0.986	0.0432065
667	CEP19_KAN631-2_1.tif:0003-0236	1.417	19.555	0	80	98.098	26.826	0.922	27.71	2151	1.12	0.893	0.957	0.0940661
668	CEP19_KAN631-2_1.tif:0004-0304	1.005	247.474	0	1283	77.231	34.567	0.963	248.666	19303	1.032	0.969	0.981	0.844146
669	CEP19_KAN631-2_1.tif:0005-0342	0.721	182.536	0	785	88.246	38.817	0.92	131.682	10222	1.143	0.875	1	0.447022
670	CEP19_KAN631-2_1.tif:0006-0345	1.159	32.922	0	105	61.753	39.165	0.907	38.17	2963	1.134	0.882	0.952	0.129576
671	CEP19_KAN631-2_1.tif:0007-0425	1.134	25.534	0	120	82.268	48.238	0.949	28.946	2247	1.199	0.834	0.957	0.0982643
672	CEP19_KAN631-2_1.tif:0008-0485	0.876	27.838	0	99	35.137	55.059	0.919	24.386	1893	1.202	0.832	0.971	0.0827834
673	CEP19_KAN631-2_1.tif:0009-0501	1.069	23.47	0	77	115.265	56.87	0.974	25.095	1948	1.18	0.848	0.971	0.0851886
674	CEP19_KAN631-2_1.tif:0010-0563	0.85	20.955	0	74	20.225	63.971	0.965	17.816	1383	1.133	0.882	0.964	0.0604804
675	CEP19_KAN631-2_1.tif:0011-0675	1.404	23.505	0	110	84.953	76.651	0.971	33.004	2562	1.077	0.928	0.96	0.11204
676	CEP19_KAN631-2_1.tif:0012-0794	0.979	27.539	0	115	120.123	90.189	0.939	26.963	2093	1.148	0.871	0.974	0.0915296
677	CEP19_KAN631-2_1.tif:0013-0819	0.902	237.143	0	1281	112.762	92.968	0.947	213.845	16600	1.125	0.889	0.986	0.72594
678	CEP19_KAN631-2_1.tif:0014-0892	1.224	25.853	0	118	93.129	101.289	0.914	31.639	2456	1.134	0.882	0.941	0.107404
679	CEP19_KAN631-2_1.tif:0015-0966	0.76	16.136	0	42	24.288	109.65	0.953	12.264	952	1.18	0.848	0.959	0.0416322
680	CEP19_KAN631-2_2.tif:0001-0007	1.211	21.872	0	105	18.743	0.867	0.876	26.486	2056	1.465	0.683	0.935	0.0899116
681	CEP19_KAN631-2_2.tif:0002-0012	1.134	30.545	0	110	30.695	1.399	0.917	34.627	2688	1.278	0.782	0.946	0.11755
682	CEP19_KAN631-2_2.tif:0003-0084	1.211	9.84	0	43	53.35	9.574	0.966	11.916	925	1.097	0.912	0.945	0.0404515
683	CEP19_KAN631-2_2.tif:0004-0119	1.237	36.396	0	118	74.864	13.524	0.954	45.011	3494	1.214	0.824	0.955	0.152797
684	CEP19_KAN631-2_2.tif:0005-0223	1.456	24.876	0	135	54.335	25.311	0.881	36.212	2811	1.587	0.63	0.958	0.122929
685	CEP19_KAN631-2_2.tif:0006-0252	1.366	28.83	0	115	91.409	28.679	0.916	39.368	3056	1.198	0.835	0.951	0.133643
686	CEP19_KAN631-2_2.tif:0007-0272	0.76	26.661	0	110	69.128	30.879	0.994	20.264	1573	1.112	0.899	0.959	0.0687894
687	CEP19_KAN631-2_2.tif:0008-0278	1.327	37.417	0	197	131.056	31.536	0.878	49.648	3854	1.558	0.642	0.916	0.16854
688	CEP19_KAN631-2_2.tif:0009-0531	1.262	25.082	0	107	98.007	60.296	0.974	31.665	2458	1.112	0.9	0.951	0.107492
689	CEP19_KAN631-2_2.tif:0010-0657	1.25	19.526	0	69	117.735	74.59	0.904	24.399	1894	1.266	0.79	0.951	0.0828271
690	CEP19_KAN631-2_2.tif:0011-0663	0.799	151.403	0	750	96.929	75.251	0.96	120.926	9387	1.081	0.925	0.984	0.410506
691	CEP19_KAN631-2_2.tif:0012-0726	1.082	17.131	0	125	30.652	82.394	0.937	18.538	1439	1.082	0.924	0.928	0.0629294
692	CEP19_KAN631-2_2.tif:0013-0846	0.863	14.896	0	62	122.869	96.005	0.98	12.856	998	1.162	0.86	0.971	0.0436439
693	CEP19_KAN631-2_2.tif:0014-0861	1.713	163.128	0	610	35.493	97.691	0.694	279.493	21696	2.434	0.411	0.96	0.948795
694	CEP19_KAN631-2_2.tif:0015-0977	1.147	10.989	0	38	59.192	110.89	0.885	12.599	978	1.575	0.635	0.932	0.0427692
695	CEP19_KAN631-2_2.tif:0016-1001	0.837	40.615	0	178	136.033	113.607	0.951	34.009	2640	1.29	0.775	0.963	0.115451
696	CEP19_KAN631-2_2.tif:0017-1074	0.824	25.828	0	109	71.736	121.945	0.9	21.294	1653	1.49	0.671	0.955	0.0722879
697	CEP19_KAN631-2_2.tif:0018-1132	0.683	15.736	0	52	98.352	128.475	0.949	10.744	834	1.185	0.844	0.972	0.0364719
698	CEP19_KAN631-2_3.tif:0001-0098	1.417	29.727	0	104	85.168	11.2	0.95	42.125	3270	1.014	0.986	0.961	0.143001
699	CEP19_KAN631-2_3.tif:0002-0234	1.43	27.676	0	122	96.82	26.554	0.959	39.574	3072	1.21	0.826	0.969	0.134343
700	CEP19_KAN631-2_3.tif:0003-0492	0.915	183.521	0	491	95.107	55.905	0.924	167.856	13030	1.13	0.885	0.993	0.569819
701	CEP19_KAN631-2_3.tif:0004-0500	1.417	30.845	0	95	118.476	56.787	0.922	43.709	3393	1.126	0.888	0.965	0.14838
702	CEP19_KAN631-2_3.tif:0005-0573	1.25	21.052	0	71	114.634	65.079	0.964	26.306	2042	1.108	0.902	0.946	0.0892993
703	CEP19_KAN631-2_3.tif:0006-0626	1.134	37.932	0	157	33.515	71.083	0.949	43.001	3338	1.246	0.803	0.957	0.145975
704	CEP19_KAN631-2_3.tif:0007-0625	0.67	21.885	0	73	144.601	71.007	1	14.66	1138	1.179	0.848	0.963	0.0497662
705	CEP19_KAN631-2_3.tif:0008-0654	0.786	50.623	0	241	72.144	74.286	0.945	39.78	3088	1.281	0.781	0.984	0.135042
706	CEP19_KAN631-2_3.tif:0009-0818	1.018	18.962	0	64	0.923	92.828	0.997	19.298	1498	1.101	0.908	0.958	0.0655095
707	CEP19_KAN631-2_3.tif:0010-0818	0.966	20.84	0	109	15.844	92.909	0.926	20.135	1563	1.183	0.846	0.962	0.068352
708	CEP19_KAN631-2_3.tif:0011-0986	1.185	19.098	0	79	105.617	111.973	0.959	22.634	1757	1.21	0.827	0.963	0.0768359
709	CEP19_KAN631-2_3.tif:0012-1055	0.824	231.625	0	982	85.125	119.743	0.914	190.967	14824	1	1	1	0.648273
710	CEP19_KAN631-2_3.tif:0013-1095	0.824	18.984	0	77	69.233	124.345	0.936	15.652	1215	1.255	0.797	0.948	0.0531335
711	CEP19_KAN631-2_3.tif:0014-1235	0.747	23.69	0	83	42.699	140.192	0.936	17.7	1374	1.222	0.818	0.959	0.0600868
712	CEP19_KAN631-2_4.tif:0001-0044	1.069	34.94	0	98	53.091	5.007	0.908	37.359	2900	1.387	0.721	0.976	0.126821
713	CEP19_KAN631-2_4.tif:0002-0128	1.456	35.46	0	91	136.25	14.54	0.964	51.619	4007	1.096	0.913	0.938	0.175231
714	CEP19_KAN631-2_4.tif:0003-0135	0.76	17.898	0	112	143.282	15.354	0.914	13.604	1056	1.316	0.76	0.967	0.0461803
715	CEP19_KAN631-2_4.tif:0004-0285	1.481	33.139	0	177	18.515	32.376	0.952	49.094	3811	1.232	0.812	0.947	0.16666
716	CEP19_KAN631-2_4.tif:0005-0297	1.443	26.5	0	83	102.386	33.706	0.955	38.235	2968	1.183	0.846	0.957	0.129795
717	CEP19_KAN631-2_4.tif:0006-0328	0.979	27.461	0	162	62.204	37.271	0.924	26.885	2087	1.147	0.872	0.927	0.0912673
718	CEP19_KAN631-2_4.tif:0007-0435	1.147	22.438	0	73	23.133	49.448	0.927	25.726	1997	1.238	0.808	0.952	0.0873314
719	CEP19_KAN631-2_4.tif:0008-0451	1.391	18.907	0	70	135.581	51.228	0.921	26.306	2042	1.162	0.861	0.931	0.0892993
720	CEP19_KAN631-2_4.tif:0009-0519	1.031	114	0	457	82.37	58.955	0.906	117.486	9120	1.2	0.834	0.941	0.39883
721	CEP19_KAN631-2_4.tif:0010-0750	0.863	33	0	122	99.864	85.19	0.98	28.483	2211	1.13	0.885	0.964	0.0966899
722	CEP19_KAN631-2_4.tif:0011-0853	1.288	29.39	0	114	72.95	96.858	0.891	37.861	2939	1.212	0.825	0.926	0.128526
723	CEP19_KAN631-2_4.tif:0012-0860	1.056	14.049	0	60	118.947	97.685	0.928	14.84	1152	1.156	0.865	0.959	0.0503785
724	CEP19_KAN631-2_4.tif:0013-1030	0.773	10.233	0	60	16.433	116.916	0.969	7.91	614	1.066	0.938	0.976	0.026851
725	CEP19_KAN631-2_4.tif:0014-1187	0.915	9.676	0	48	109.316	134.727	0.945	8.85	687	1.279	0.782	0.947	0.0300434
										3714.75				0.162451
														0
														0
CEP83 KO														0
726	CEP19_KAN631-3_1.tif:0001-0010	1.804	87.336	0	492	128.372	1.189	0.893	157.511	12227	1.116	0.896	0.927	0.534703
727	CEP19_KAN631-3_1.tif:0002-0033	0.863	42.164	0	163	25.611	3.751	0.942	36.392	2825	1.145	0.873	0.964	0.123541
728	CEP19_KAN631-3_1.tif:0003-0076	1.636	45.26	0	404	112.184	8.617	0.888	74.047	5748	1.36	0.735	0.924	0.251368
729	CEP19_KAN631-3_1.tif:0004-0126	1.043	79.802	0	231	72.976	14.352	0.95	83.271	6464	1.087	0.92	0.953	0.282679
730	CEP19_KAN631-3_1.tif:0005-0133	1.546	110.033	0	586	38.993	15.113	0.835	170.097	13204	1.2	0.833	0.952	0.577428
731	CEP19_KAN631-3_1.tif:0006-0256	1.069	104.217	0	609	138.524	29.129	0.865	111.431	8650	1.437	0.696	0.922	0.378276
732	CEP19_KAN631-3_1.tif:0007-0268	1.881	234.521	0	2007	55.952	30.403	0.931	441.088	34240	1.274	0.785	0.948	1.49736
733	CEP19_KAN631-3_1.tif:0008-0297	2.138	107.277	0	650	99.555	33.815	0.849	229.407	17808	1.166	0.858	0.927	0.778767
734	CEP19_KAN631-3_1.tif:0009-0372	1.34	51.404	0	192	4.767	42.299	0.939	68.869	5346	1.103	0.907	0.977	0.233788
735	CEP19_KAN631-3_1.tif:0010-0505	1.314	15.216	0	111	33.201	57.316	0.95	19.993	1552	1.142	0.876	0.967	0.067871
736	CEP19_KAN631-3_1.tif:0011-0528	1.713	66.496	0	352	132.274	59.945	0.984	113.931	8844	1.153	0.867	0.957	0.38676
737	CEP19_KAN631-3_1.tif:0012-0607	1.456	22.168	0	95	95.713	68.948	0.935	32.27	2505	1.324	0.755	0.95	0.109547
738	CEP19_KAN631-3_1.tif:0013-0652	1.172	15.451	0	87	35.89	73.993	0.917	18.112	1406	1.078	0.928	0.958	0.0614862
739	CEP19_KAN631-3_1.tif:0014-0709	2.409	118.775	0	861	105.081	80.446	0.856	286.128	22211	1.582	0.632	0.959	0.971316
740	CEP19_KAN631-3_1.tif:0015-0875	2.216	108.738	0	820	57.285	99.352	0.77	240.937	18703	1.29	0.775	0.875	0.817907
741	CEP19_KAN631-3_1.tif:0016-0882	1.816	151.752	0	1210	77.272	100.208	0.845	275.642	21397	1.588	0.63	0.904	0.935719
742	CEP19_KAN631-3_1.tif:0017-0886	1.958	103.684	0	548	117.961	100.648	0.836	203.024	15760	1.701	0.588	0.924	0.689206
743	CEP19_KAN631-3_1.tif:0018-0908	1.52	42.068	0	208	100.902	103.115	0.976	63.947	4964	1.286	0.777	0.967	0.217082
744	CEP19_KAN631-3_1.tif:0019-0923	1.623	175.183	0	1164	17.951	104.744	0.943	284.35	22073	1.174	0.852	0.951	0.965281
745	CEP19_KAN631-3_1.tif:0020-1031	2.023	149.924	0	1263	46.077	117.012	0.917	303.222	23538	1.112	0.899	0.949	1.02935
746	CEP19_KAN631-3_1.tif:0021-1080	0.94	15.123	0	76	135.843	122.587	0.972	14.222	1104	1.256	0.796	0.954	0.0482794
747	CEP19_KAN631-3_1.tif:0022-1088	1.327	61.262	0	402	7.374	123.559	0.96	81.287	6310	1.104	0.905	0.972	0.275945
748	CEP19_KAN631-3_1.tif:0023-1218	1.417	101.955	0	669	38.248	138.299	0.858	144.474	11215	1.344	0.744	0.917	0.490447
749	CEP19_KAN631-3_2.tif:0001-0006	1.043	65.383	0	230	14.893	0.707	0.95	68.224	5296	1.207	0.829	0.959	0.231601
750	CEP19_KAN631-3_2.tif:0002-0098	1.675	193.469	0	1310	111.951	11.178	0.92	324.002	25151	1.155	0.866	0.956	1.09989
751	CEP19_KAN631-3_2.tif:0003-0097	0.721	184.196	0	762	35.809	11.01	0.92	132.88	10315	1.143	0.875	1	0.451089
752	CEP19_KAN631-3_2.tif:0004-0114	0.812	224.524	11	953	30.639	12.945	0.937	182.219	14145	1.039	0.963	0.992	0.618579
753	CEP19_KAN631-3_2.tif:0005-0117	1.842	161.252	0	835	86.418	13.269	0.875	297.052	23059	1.518	0.659	0.976	1.0084
754	CEP19_KAN631-3_2.tif:0006-0190	1.275	190.04	0	555	95.336	21.617	0.952	242.367	18814	1.126	0.888	0.952	0.822761
755	CEP19_KAN631-3_2.tif:0007-0276	2.074	195.975	0	1335	68.423	31.288	0.908	406.461	31552	1.077	0.928	0.923	1.37981
756	CEP19_KAN631-3_2.tif:0008-0278	1.095	57.541	0	197	23.559	31.614	0.916	63.007	4891	1.366	0.732	0.939	0.21389
757	CEP19_KAN631-3_2.tif:0009-0377	0.94	52.26	0	225	126.642	42.796	0.972	49.146	3815	1.247	0.802	0.967	0.166835
758	CEP19_KAN631-3_2.tif:0010-0417	0.966	46.267	0	166	132.178	47.388	0.926	44.701	3470	1.111	0.9	0.962	0.151748
759	CEP19_KAN631-3_2.tif:0011-0434	2.19	157.471	0	799	136.006	49.264	0.903	344.858	26770	1.342	0.745	0.926	1.17069
760	CEP19_KAN631-3_2.tif:0012-0463	0.76	53.627	0	114	40.084	52.546	0.994	40.759	3164	1.112	0.899	0.967	0.138366
761	CEP19_KAN631-3_2.tif:0013-0478	1.314	82.961	0	395	61.372	54.333	0.938	109.01	8462	1.08	0.926	0.936	0.370054
762	CEP19_KAN631-3_2.tif:0014-0542	0.915	224.225	0	573	80.239	61.58	0.924	205.085	15920	1.13	0.885	0.993	0.696203
763	CEP19_KAN631-3_2.tif:0015-0556	1.649	245.477	0	788	69.107	63.084	0.931	404.773	31421	1.164	0.859	0.955	1.37408
764	CEP19_KAN631-3_2.tif:0016-0557	2.048	112.843	0	786	117.045	63.19	0.929	231.133	17942	1.29	0.775	0.955	0.784627
765	CEP19_KAN631-3_2.tif:0017-0570	1.404	44.22	0	252	99.185	64.691	0.942	62.092	4820	1.267	0.789	0.969	0.210785
766	CEP19_KAN631-3_2.tif:0018-0591	1.121	198.678	0	687	67.594	67.073	0.951	222.67	17285	1.114	0.897	0.983	0.755896
767	CEP19_KAN631-3_2.tif:0019-0594	1.108	79.942	0	240	7.061	67.394	0.927	88.565	6875	1.349	0.741	0.94	0.300653
768	CEP19_KAN631-3_2.tif:0020-0627	0.799	168.435	26	484	124.51	71.165	0.96	134.529	10443	1.081	0.925	0.984	0.456686
769	CEP19_KAN631-3_2.tif:0021-0650	1.391	183.491	0	648	41.384	73.821	0.933	255.288	19817	1.023	0.977	0.952	0.866624
770	CEP19_KAN631-3_2.tif:0022-0933	0.812	52.905	0	278	47.359	105.985	0.886	42.937	3333	1.474	0.678	0.947	0.145756
771	CEP19_KAN631-3_2.tif:0023-0961	0.876	58.779	0	168	124.284	109.144	0.994	51.49	3997	1.131	0.884	0.971	0.174794
772	CEP19_KAN631-3_2.tif:0024-0994	1.997	181.929	0	1039	132.303	112.929	0.861	363.267	28199	1.52	0.658	0.966	1.23318
773	CEP19_KAN631-3_2.tif:0025-0995	1.018	97.063	0	367	26.035	112.948	0.997	98.781	7668	1.217	0.822	0.958	0.335332
774	CEP19_KAN631-3_2.tif:0026-1040	1.121	124.977	0	616	9.866	118.047	0.907	140.069	10873	1.144	0.874	0.935	0.475491
775	CEP19_KAN631-3_2.tif:0027-1057	1.095	98.271	0	213	79.156	120.01	0.983	107.605	8353	1.242	0.805	0.934	0.365288
776	CEP19_KAN631-3_2.tif:0028-1178	0.85	20.848	0	105	95.17	133.703	0.892	17.726	1376	1.477	0.677	0.971	0.0601743
777	CEP19_KAN631-3_2.tif:0029-1181	0.966	52.467	0	219	112.267	134.05	0.926	50.692	3935	1.267	0.789	0.968	0.172083
778	CEP19_KAN631-3_2.tif:0030-1187	0.747	96.155	0	214	22.133	134.725	0.977	71.844	5577	1.241	0.805	0.967	0.24389
779	CEP19_KAN631-3_2.tif:0031-1204	1.237	226.896	0	1215	53.487	136.706	0.894	280.601	21782	1.278	0.783	0.946	0.952556
780	CEP19_KAN631-3_3.tif:0001-0120	2.293	172.562	0	1106	59.886	13.653	0.911	395.691	30716	1.24	0.806	0.97	1.34325
781	CEP19_KAN631-3_3.tif:0002-0179	1.224	75.6	0	301	90.418	20.383	0.914	92.52	7182	1.174	0.852	0.941	0.314078
782	CEP19_KAN631-3_3.tif:0003-0200	1.456	69.097	0	480	136.888	22.699	0.935	100.585	7808	1.156	0.865	0.95	0.341454
783	CEP19_KAN631-3_3.tif:0004-0233	0.902	207.471	0	523	117.019	26.502	0.947	187.089	14523	1.146	0.873	0.986	0.63511
784	CEP19_KAN631-3_3.tif:0005-0278	1.237	86.896	0	399	24.166	31.617	0.954	107.464	8342	1.248	0.802	0.95	0.364807
785	CEP19_KAN631-3_3.tif:0006-0301	0.76	66.644	0	161	92.398	34.163	0.953	50.653	3932	1.18	0.848	0.959	0.171952
786	CEP19_KAN631-3_3.tif:0007-0491	1.391	31.417	0	230	75.696	55.792	0.894	43.709	3393	1.519	0.658	0.947	0.14838
787	CEP19_KAN631-3_3.tif:0008-0531	1.726	145.784	0	1019	61.195	60.333	0.937	251.655	19535	1.225	0.816	0.937	0.854291
788	CEP19_KAN631-3_3.tif:0009-0531	1.507	218.214	0	1261	11.897	60.241	0.861	328.897	25531	1.258	0.795	0.947	1.1165
789	CEP19_KAN631-3_3.tif:0010-0531	0.721	188.054	14	393	130.412	60.325	0.92	135.663	10531	1.143	0.875	1	0.460534
790	CEP19_KAN631-3_3.tif:0011-0551	1.237	29.042	0	182	130.412	62.607	0.924	35.916	2788	1.204	0.831	0.941	0.121923
791	CEP19_KAN631-3_3.tif:0012-0575	1.842	173.189	0	1046	118.633	65.33	0.947	319.042	24766	1.105	0.905	0.966	1.08305
792	CEP19_KAN631-3_3.tif:0013-0668	1.52	65.678	0	368	46.609	75.806	0.92	99.837	7750	1.143	0.875	0.952	0.338918
793	CEP19_KAN631-3_3.tif:0014-0742	1.25	19.794	0	104	13.638	84.227	0.933	24.734	1920	1.14	0.877	0.946	0.0839641
794	CEP19_KAN631-3_3.tif:0015-0747	1.391	102.315	0	754	135.367	84.857	0.878	142.349	11050	1.045	0.957	0.947	0.483231
795	CEP19_KAN631-3_3.tif:0016-0830	1.7	93.129	0	467	101.732	94.219	0.923	158.362	12293	1.117	0.895	0.93	0.537589
796	CEP19_KAN631-3_3.tif:0017-1039	1.765	71	0	593	77.25	117.922	0.809	125.306	9727	1.659	0.603	0.926	0.425375
797	CEP19_KAN631-3_3.tif:0018-1151	1.353	153.476	0	660	105.325	130.651	0.935	207.597	16115	1.257	0.795	0.942	0.70473
798	CEP19_KAN631-3_3.tif:0019-1188	1.443	209.009	0	1211	18.447	134.907	0.884	301.561	23409	1.462	0.684	0.978	1.02371
799	CEP19_KAN631-3_3.tif:0020-1274	0.812	49.778	0	230	91.078	144.613	0.959	40.399	3136	1.261	0.793	0.947	0.137141
800	CEP19_KAN631-3_4.tif:0001-0059	1.507	82.479	0	331	133.253	6.782	0.968	124.314	9650	1.082	0.924	0.955	0.422007
801	CEP19_KAN631-3_4.tif:0002-0080	0.992	101.156	0	375	41.164	9.109	0.903	100.34	7789	1.416	0.706	0.939	0.340623
802	CEP19_KAN631-3_4.tif:0003-0183	1.481	51.765	0	283	68.157	20.738	0.924	76.688	5953	1.225	0.817	0.95	0.260333
803	CEP19_KAN631-3_4.tif:0004-0220	1.224	99.516	0	550	41.025	24.979	0.914	121.789	9454	1.226	0.816	0.941	0.413436
804	CEP19_KAN631-3_4.tif:0005-0281	1.623	50.992	0	165	11.57	31.878	0.943	82.768	6425	1.202	0.832	0.955	0.280974
805	CEP19_KAN631-3_4.tif:0006-0309	1.121	83.184	0	435	110.214	35.077	0.971	93.229	7237	1.281	0.781	0.961	0.316484
806	CEP19_KAN631-3_4.tif:0007-0439	1.791	69.676	0	530	140.117	49.883	0.887	124.765	9685	1.388	0.72	0.946	0.423538
807	CEP19_KAN631-3_4.tif:0008-0446	0.94	58.507	0	193	4.051	50.67	0.972	55.02	4271	1.05	0.952	0.954	0.186776
808	CEP19_KAN631-3_4.tif:0009-0530	1.507	142.137	0	769	83.247	60.158	0.968	214.232	16630	1.112	0.899	0.955	0.727252
809	CEP19_KAN631-3_4.tif:0010-0571	1.546	204.975	0	592	136.285	64.852	0.964	316.865	24597	1.091	0.916	0.964	1.07566
810	CEP19_KAN631-3_4.tif:0011-0595	1.752	317.963	0	1791	107.267	67.557	0.936	557.067	43243	1.007	0.993	0.978	1.89107
811	CEP19_KAN631-3_4.tif:0012-0679	0.915	203.155	0	576	96.992	77.061	0.924	185.814	14424	1.13	0.885	0.993	0.630781
812	CEP19_KAN631-3_4.tif:0013-0690	1.52	184.017	0	899	12.624	78.324	0.92	279.725	21714	1.34	0.746	0.975	0.949582
813	CEP19_KAN631-3_4.tif:0014-0725	1.597	100.04	0	386	42.908	82.322	0.944	159.804	12405	1.36	0.735	0.929	0.542487
814	CEP19_KAN631-3_4.tif:0015-0740	1.327	32.592	0	115	63.476	84.014	0.93	43.246	3357	1.158	0.864	0.972	0.146806
815	CEP19_KAN631-3_4.tif:0016-0799	0.928	21.514	0	107	99.571	90.718	0.996	19.955	1549	1.133	0.883	0.96	0.0677398
816	CEP19_KAN631-3_4.tif:0017-0912	1.314	103.01	0	664	102.434	103.538	0.95	135.354	10507	1.101	0.908	0.971	0.459485
817	CEP19_KAN631-3_4.tif:0018-0952	1.417	121.982	0	392	53.44	108.073	0.91	172.854	13418	1.357	0.737	0.936	0.586787
818	CEP19_KAN631-3_4.tif:0019-1133	1.546	38.275	0	104	70.409	128.672	0.952	59.168	4593	1.239	0.807	0.938	0.200858
819	CEP19_KAN631-3_4.tif:0020-1158	1.275	165.838	0	754	42.615	131.412	0.894	211.501	16418	1.372	0.729	0.957	0.717981
820	CEP19_KAN631-3_4.tif:0021-1181	1.005	123.192	0	581	133.197	134.106	0.929	123.786	9609	1.093	0.915	0.981	0.420214
821	CEP19_KAN631-3_4.tif:0022-1265	1.469	171.149	0	1159	90.775	143.591	0.864	251.346	19511	1.41	0.709	0.938	0.853242
822	CEP19_KAN631-3_4.tif:0023-1267	1.546	120.833	0	615	119.584	143.888	0.873	186.793	14500	1.335	0.749	0.93	0.634104
										12350.5				0.540104
														0
														0
SCLT1 KO														0
823	CEP19_KAN631-4_1.tif:0001-0015	0.915	188.451	0	575	24.012	1.708	0.924	172.365	13380	1.13	0.885	0.993	0.585125
824	CEP19_KAN631-4_1.tif:0002-0042	1.469	187.149	0	1067	60.676	4.73	0.943	274.843	21335	1.109	0.902	0.95	0.933008
825	CEP19_KAN631-4_1.tif:0003-0112	1.572	206.311	0	1164	96.335	12.703	0.924	324.246	25170	1.099	0.91	0.972	1.10072
826	CEP19_KAN631-4_1.tif:0004-0118	2.151	224.569	0	1358	43.01	13.429	0.887	483.123	37503	1.377	0.726	0.93	1.64006
827	CEP19_KAN631-4_1.tif:0005-0134	1.688	167.924	0	1238	66.678	15.26	0.902	283.384	21998	1.252	0.799	0.96	0.962002
828	CEP19_KAN631-4_1.tif:0006-0290	0.889	22.087	0	75	26.094	32.977	0.839	19.633	1524	1.538	0.65	0.879	0.0666465
829	CEP19_KAN631-4_1.tif:0007-0300	1.752	189.61	0	1274	111.341	34.144	0.926	332.195	25787	1.157	0.864	0.951	1.1277
830	CEP19_KAN631-4_1.tif:0008-0314	0.721	179.089	0	801	46.308	35.696	0.92	129.196	10029	1.143	0.875	1	0.438581
831	CEP19_KAN631-4_1.tif:0009-0349	1.765	192.686	0	969	43.157	39.677	0.884	340.066	26398	1.191	0.84	0.948	1.15442
832	CEP19_KAN631-4_1.tif:0010-0412	0.799	202.919	9	673	104.08	46.762	0.96	162.072	12581	1.081	0.925	0.984	0.550184
833	CEP19_KAN631-4_1.tif:0011-0440	0.721	188.018	0	542	95.283	49.94	0.92	135.637	10529	1.143	0.875	1	0.460447
834	CEP19_KAN631-4_1.tif:0012-0442	0.812	212.556	16	579	105.044	50.224	0.9	172.506	13391	1.286	0.778	1	0.585606
835	CEP19_KAN631-4_1.tif:0013-0459	0.812	214.016	0	867	44.498	52.09	0.937	173.691	13483	1.039	0.963	0.992	0.589629
836	CEP19_KAN631-4_1.tif:0014-0470	0.824	260.172	0	1087	47.67	53.345	0.914	214.502	16651	1	1	1	0.72817
837	CEP19_KAN631-4_1.tif:0015-0494	1.301	295.554	0	1630	44.951	56.122	0.972	384.548	29851	1.155	0.866	0.967	1.30542
838	CEP19_KAN631-4_1.tif:0016-0525	0.721	199.946	0	653	21.792	59.644	0.92	144.243	11197	1.143	0.875	1	0.48966
839	CEP19_KAN631-4_1.tif:0017-0577	1.237	229.406	0	1147	9.545	65.499	0.936	283.706	22023	1.007	0.993	0.98	0.963095
840	CEP19_KAN631-4_1.tif:0018-0609	1.237	353.396	0	2104	88.426	69.122	0.936	437.043	33926	1.049	0.953	0.98	1.48363
841	CEP19_KAN631-4_1.tif:0019-0634	2.396	187.339	0	907	84.97	71.955	0.844	448.882	34845	1.398	0.715	0.928	1.52382
842	CEP19_KAN631-4_1.tif:0020-0678	1.752	207.11	0	783	31.765	76.929	0.936	362.854	28167	1.099	0.91	0.982	1.23178
843	CEP19_KAN631-4_1.tif:0021-0718	1.533	194.008	0	1045	22.944	81.536	0.956	297.413	23087	1.096	0.912	0.96	1.00962
844	CEP19_KAN631-4_1.tif:0022-0792	1.623	98.857	0	724	59.644	89.883	0.955	160.461	12456	1.115	0.897	0.981	0.544717
845	CEP19_KAN631-4_1.tif:0023-0804	1.649	189.656	0	962	120.945	91.238	0.921	312.73	24276	1.352	0.739	0.938	1.06162
846	CEP19_KAN631-4_1.tif:0024-1039	1.507	124.222	0	639	72.867	118.015	0.94	187.231	14534	1.153	0.867	0.955	0.635591
847	CEP19_KAN631-4_1.tif:0025-1043	0.953	49.189	0	148	119.402	118.437	0.9	46.891	3640	1.483	0.674	0.925	0.159182
848	CEP19_KAN631-4_1.tif:0026-1091	1.301	122.396	0	658	26.656	123.791	0.846	159.25	12362	1.245	0.803	0.914	0.540607
849	CEP19_KAN631-4_2.tif:0001-0034	1.327	81.184	0	496	92.915	3.869	0.901	107.721	8362	1.088	0.919	0.967	0.365681
850	CEP19_KAN631-4_2.tif:0002-0039	1.636	118.268	0	720	38.987	4.463	0.951	193.491	15020	1.189	0.841	0.958	0.656844
851	CEP19_KAN631-4_2.tif:0003-0076	1.043	34.938	0	93	128.086	8.608	0.95	36.457	2830	1.214	0.824	0.959	0.12376
852	CEP19_KAN631-4_2.tif:0004-0096	1.456	117.655	0	659	7.6	10.951	0.881	171.27	13295	1.303	0.768	0.942	0.581408
853	CEP19_KAN631-4_2.tif:0005-0131	1.404	158.486	0	1112	63.943	14.946	0.913	222.541	17275	1.452	0.689	0.969	0.755458
854	CEP19_KAN631-4_2.tif:0006-0145	1.675	118.015	0	395	110.063	16.513	0.909	197.64	15342	1.144	0.875	0.935	0.670926
855	CEP19_KAN631-4_2.tif:0007-0186	1.804	244.971	0	1993	126.557	21.161	0.942	441.81	34296	1.165	0.858	0.94	1.49981
856	CEP19_KAN631-4_2.tif:0008-0220	1.121	278.253	0	1314	96.195	24.964	0.919	311.854	24208	1.135	0.881	0.983	1.05865
857	CEP19_KAN631-4_2.tif:0009-0258	0.928	98.236	0	260	28.922	29.272	0.958	91.116	7073	1.275	0.784	0.954	0.309312
858	CEP19_KAN631-4_2.tif:0010-0321	1.481	62.939	0	305	98.286	36.466	0.952	93.242	7238	1.185	0.844	0.95	0.316527
859	CEP19_KAN631-4_2.tif:0011-0440	1.726	112.358	0	815	133.964	50.003	0.912	193.955	15056	1.227	0.815	0.94	0.658419
860	CEP19_KAN631-4_2.tif:0012-0473	1.778	181.667	0	1359	51.86	53.736	0.806	322.958	25070	1.584	0.631	0.896	1.09634
861	CEP19_KAN631-4_2.tif:0013-0531	2.087	247.457	0	1825	110.027	60.214	0.878	516.424	40088	1.286	0.777	0.961	1.7531
862	CEP19_KAN631-4_2.tif:0014-0554	1.198	191.14	0	1121	22.82	62.892	0.969	228.995	17776	1.019	0.981	0.964	0.777368
863	CEP19_KAN631-4_2.tif:0015-0707	1.43	84.117	0	245	98.915	80.293	0.989	120.282	9337	1.009	0.991	0.965	0.408319
864	CEP19_KAN631-4_2.tif:0016-0737	1.353	77.552	0	291	54.291	83.698	0.965	104.9	8143	1.039	0.963	0.942	0.356104
865	CEP19_KAN631-4_2.tif:0017-0797	1.804	176.379	0	1218	24.813	90.461	0.927	318.101	24693	1.151	0.869	0.956	1.07986
866	CEP19_KAN631-4_2.tif:0018-0813	1.147	93.888	0	418	5.969	92.339	0.927	107.644	8356	1.259	0.794	0.952	0.365419
867	CEP19_KAN631-4_2.tif:0019-0958	2.023	332.197	0	2266	65.493	108.699	0.881	671.874	52155	1.204	0.831	0.972	2.28081
868	CEP19_KAN631-4_2.tif:0020-0962	1.546	138.225	0	527	130.715	109.202	0.909	213.678	16587	1.17	0.855	0.964	0.725371
869	CEP19_KAN631-4_2.tif:0021-1017	1.043	98.074	0	265	113.732	115.474	0.95	102.337	7944	1.08	0.926	0.953	0.347402
870	CEP19_KAN631-4_2.tif:0022-1216	1.198	115.806	0	597	91.364	138.003	0.937	138.742	10770	1.069	0.936	0.964	0.470986
871	CEP19_KAN631-4_2.tif:0023-1254	1.147	105.787	0	542	39.315	142.387	0.927	121.286	9415	1.308	0.765	0.952	0.41173
872	CEP19_KAN631-4_3.tif:0001-0078	0.799	176.419	0	532	81.72	8.853	0.96	140.906	10938	1.081	0.925	0.984	0.478333
873	CEP19_KAN631-4_3.tif:0002-0098	2.757	207.645	0	1148	82.07	11.336	0.654	572.436	44436	1.714	0.584	0.839	1.94324
874	CEP19_KAN631-4_3.tif:0003-0120	0.824	235.703	0	828	82.288	13.62	0.914	194.329	15085	1	1	1	0.659687
875	CEP19_KAN631-4_3.tif:0004-0122	1.25	110.567	0	785	57.547	13.904	0.933	138.162	10725	1.233	0.811	0.942	0.469018
876	CEP19_KAN631-4_3.tif:0005-0174	1.816	62.028	0	202	136.517	19.755	0.924	112.668	8746	1.222	0.818	0.946	0.382474
877	CEP19_KAN631-4_3.tif:0006-0215	1.546	252.558	0	1523	116.978	24.387	0.964	390.422	30307	1.177	0.85	0.968	1.32537
878	CEP19_KAN631-4_3.tif:0007-0247	1.417	135.991	0	599	13.186	28.028	0.95	192.706	14959	1.261	0.793	0.973	0.654177
879	CEP19_KAN631-4_3.tif:0008-0333	0.979	212.553	0	474	97.374	37.785	0.905	208.1	16154	1.302	0.768	0.974	0.706436
880	CEP19_KAN631-4_3.tif:0009-0349	0.812	188.063	0	717	96.809	39.618	0.937	152.629	11848	1.039	0.963	0.992	0.518129
881	CEP19_KAN631-4_3.tif:0010-0415	1.43	258.748	0	906	63.067	47.152	0.959	369.991	28721	1.164	0.859	0.974	1.25601
882	CEP19_KAN631-4_3.tif:0011-0439	1.005	188.564	0	541	50.911	49.879	0.929	189.472	14708	1.093	0.915	0.981	0.6432
883	CEP19_KAN631-4_3.tif:0012-0441	1.005	166.192	0	404	43.635	50.116	0.963	166.993	12963	1.032	0.969	0.981	0.566889
884	CEP19_KAN631-4_3.tif:0013-0460	0.812	176.127	9	588	44.839	52.204	0.937	142.941	11096	1.039	0.963	0.992	0.485243
885	CEP19_KAN631-4_3.tif:0014-0504	0.902	193	8	640	96.918	57.261	0.947	174.039	13510	1.125	0.889	0.986	0.59081
886	CEP19_KAN631-4_3.tif:0015-0532	1.275	164.172	0	584	88.364	60.369	0.952	209.375	16253	1.15	0.87	0.957	0.710765
887	CEP19_KAN631-4_3.tif:0016-0606	1.443	104.411	0	474	20.697	68.757	0.873	150.645	11694	1.4	0.714	0.937	0.511394
888	CEP19_KAN631-4_3.tif:0017-0609	0.953	178.581	0	731	2.334	69.184	0.985	170.239	13215	1.028	0.973	0.955	0.577909
889	CEP19_KAN631-4_3.tif:0018-0634	1.585	86.163	0	744	29.187	72.054	0.921	136.526	10598	1.363	0.734	0.965	0.463464
890	CEP19_KAN631-4_3.tif:0019-0672	1.804	212.971	0	644	103.895	76.287	0.927	384.097	29816	1.318	0.758	0.966	1.30389
891	CEP19_KAN631-4_3.tif:0020-0674	1.61	81.168	0	494	53.329	76.595	0.91	130.703	10146	1.253	0.798	0.954	0.443698
892	CEP19_KAN631-4_3.tif:0021-0673	0.889	173.014	0	551	75.085	76.38	0.933	153.788	11938	1.172	0.853	0.979	0.522064
893	CEP19_KAN631-4_3.tif:0022-0687	0.721	168.911	0	449	74.059	77.975	0.92	121.853	9459	1.143	0.875	1	0.413655
894	CEP19_KAN631-4_3.tif:0023-0804	1.147	195.079	0	508	39.888	91.267	0.803	223.662	17362	1.519	0.658	0.894	0.759263
895	CEP19_KAN631-4_3.tif:0024-0807	0.902	187.071	0	553	46.365	91.595	0.947	168.693	13095	1.146	0.873	0.986	0.572662
896	CEP19_KAN631-4_3.tif:0025-0841	0.992	79.234	0	183	24.471	95.5	0.951	78.595	6101	1.01	0.99	0.975	0.266805
897	CEP19_KAN631-4_3.tif:0026-0849	1.533	165.412	0	517	48.408	96.418	0.717	253.574	19684	2.429	0.412	1	0.860807
898	CEP19_KAN631-4_3.tif:0027-0884	1.288	144.76	0	755	41.633	100.333	0.891	186.483	14476	1.446	0.691	0.939	0.633055
899	CEP19_KAN631-4_3.tif:0028-0903	1.443	131.616	0	759	5.814	102.567	0.873	189.897	14741	1.314	0.761	0.922	0.644643
900	CEP19_KAN631-4_3.tif:0029-0909	0.721	190.214	11	496	44.152	103.228	0.92	137.222	10652	1.143	0.875	1	0.465826
901	CEP19_KAN631-4_3.tif:0030-0949	1.288	192.47	0	533	32.242	107.76	0.962	247.945	19247	1.119	0.893	0.962	0.841697
902	CEP19_KAN631-4_3.tif:0031-0964	1.443	183.08	0	448	101.427	109.45	0.75	264.151	20505	2.027	0.493	0.918	0.896711
903	CEP19_KAN631-4_3.tif:0032-0992	1.469	128.289	0	547	12.525	112.608	0.916	188.403	14625	1.163	0.86	0.942	0.639571
904	CEP19_KAN631-4_3.tif:0033-0997	1.378	67.028	0	193	101.717	113.171	0.953	92.392	7172	1.206	0.829	0.955	0.313641
905	CEP19_KAN631-4_3.tif:0034-1081	1.34	100.567	0	461	141.734	122.738	0.898	134.735	10459	1.09	0.918	0.937	0.457386
906	CEP19_KAN631-4_3.tif:0035-1203	0.721	197.161	33	498	85.636	136.541	0.92	142.233	11041	1.143	0.875	1	0.482837
907	CEP19_KAN631-4_4.tif:0001-0068	0.721	155.929	10	607	85.749	7.718	0.92	112.488	8732	1.143	0.875	1	0.381862
908	CEP19_KAN631-4_4.tif:0002-0073	0.824	118.484	23	215	32.791	8.355	0.974	97.686	7583	1.14	0.878	0.948	0.331615
909	CEP19_KAN631-4_4.tif:0003-0088	1.739	140.422	0	535	129.794	10.028	0.944	244.209	18957	1.11	0.901	0.957	0.829015
910	CEP19_KAN631-4_4.tif:0004-0148	0.902	210.686	0	626	35.628	16.866	0.911	189.987	14748	1.149	0.87	0.986	0.644949
911	CEP19_KAN631-4_4.tif:0005-0210	1.855	246.09	0	1938	97.843	23.797	0.943	456.508	35437	1.195	0.837	0.947	1.54971
912	CEP19_KAN631-4_4.tif:0006-0242	1.507	192.838	0	596	48.87	27.458	0.775	290.649	22562	1.823	0.548	0.893	0.986666
913	CEP19_KAN631-4_4.tif:0007-0343	1.675	199.746	0	1162	130.106	38.931	0.92	334.513	25967	1.054	0.949	0.959	1.13557
914	CEP19_KAN631-4_4.tif:0008-0354	1.366	146.613	0	699	37.607	40.214	0.975	200.203	15541	1.03	0.971	0.942	0.679628
915	CEP19_KAN631-4_4.tif:0009-0387	0.721	184.679	0	699	86.771	43.925	0.92	133.228	10342	1.143	0.875	1	0.452269
916	CEP19_KAN631-4_4.tif:0010-0405	0.812	161	3	477	66.517	45.961	0.937	130.665	10143	1.039	0.963	0.992	0.443567
917	CEP19_KAN631-4_4.tif:0011-0421	0.902	213.886	0	1008	96.078	47.784	0.947	192.873	14972	1.146	0.873	0.986	0.654745
918	CEP19_KAN631-4_4.tif:0012-0436	0.992	224.909	0	1154	83.933	49.543	0.951	223.095	17318	1.123	0.891	0.975	0.757339
919	CEP19_KAN631-4_4.tif:0013-0520	0.876	141.838	0	415	88.076	59.077	0.919	124.249	9645	1.203	0.831	0.971	0.421789
920	CEP19_KAN631-4_4.tif:0014-0561	0.992	213.234	0	1028	90.619	63.741	0.951	211.514	16419	1.123	0.89	0.981	0.718024
921	CEP19_KAN631-4_4.tif:0015-0604	1.997	190.542	0	1337	141.446	68.649	0.905	380.464	29534	1.291	0.775	0.951	1.29156
922	CEP19_KAN631-4_4.tif:0016-0637	2.319	217.9	0	1988	14.713	72.242	0.862	505.268	39222	1.581	0.632	0.933	1.71523
923	CEP19_KAN631-4_4.tif:0017-0713	0.812	81.714	0	315	106.763	80.912	0.921	66.318	5148	1.347	0.742	0.94	0.225129
924	CEP19_KAN631-4_4.tif:0018-0771	0.902	183.486	7	576	15.481	87.52	0.947	165.46	12844	1.149	0.87	0.986	0.561685
925	CEP19_KAN631-4_4.tif:0019-0778	1.366	66.689	0	428	119.791	88.354	0.944	91.065	7069	1.421	0.704	0.959	0.309137
926	CEP19_KAN631-4_4.tif:0020-0786	0.721	173.446	0	816	50.962	89.268	0.92	125.125	9713	1.143	0.875	1	0.424762
927	CEP19_KAN631-4_4.tif:0021-0799	1.726	104.612	0	805	72.737	90.704	0.937	180.583	14018	1.094	0.914	0.947	0.613026
928	CEP19_KAN631-4_4.tif:0022-0844	1.018	234	0	1035	80.642	95.851	0.941	238.141	18486	1.064	0.94	0.988	0.808417
929	CEP19_KAN631-4_4.tif:0023-0907	1.572	243.492	0	918	77.002	102.925	0.951	382.68	29706	1.083	0.923	0.968	1.29908
930	CEP19_KAN631-4_4.tif:0024-0914	1.417	234.427	0	1042	34.598	103.749	0.95	332.195	25787	1.18	0.847	0.961	1.1277
931	CEP19_KAN631-4_4.tif:0025-0960	0.992	183.506	0	497	33.653	109.017	0.917	182.026	14130	1.123	0.891	0.975	0.617924
932	CEP19_KAN631-4_4.tif:0026-0969	1.25	142.464	0	380	79.307	110.021	0.933	178.02	13819	1.128	0.887	0.942	0.604323
933	CEP19_KAN631-4_4.tif:0027-0988	1.585	120.317	0	633	52.32	112.131	0.948	190.644	14799	1.15	0.87	0.939	0.64718
934	CEP19_KAN631-4_4.tif:0028-1053	0.902	181.843	0	654	18.457	119.516	0.947	163.978	12729	1.187	0.843	0.986	0.556656
935	CEP19_KAN631-4_4.tif:0029-1119	1.353	149.914	0	814	35.518	127.021	0.907	202.78	15741	1.312	0.762	0.938	0.688375
936	CEP19_KAN631-4_4.tif:0030-1197	1.34	160.798	0	840	127.768	135.82	0.898	215.43	16723	1.253	0.798	0.933	0.731319
937	CEP19_KAN631-4_4.tif:0031-1228	1.353	149.486	0	852	123.118	139.393	0.854	202.2	15696	1.45	0.69	0.959	0.686407
										16960.5				0.741705
														0
														0
FBF1 KO														0
938	CEP19_KAN631-5_1.tif:0001-0008	1.572	173.943	0	940	24.79	0.885	0.924	273.374	21221	1.304	0.767	0.976	0.928022
939	CEP19_KAN631-5_1.tif:0002-0052	1.945	237.861	0	1942	98.423	5.893	0.928	462.692	35917	1.276	0.784	0.941	1.5707
940	CEP19_KAN631-5_1.tif:0003-0094	1.984	138.026	0	775	126.175	10.659	0.847	273.825	21256	1.508	0.663	0.917	0.929553
941	CEP19_KAN631-5_1.tif:0004-0149	1.585	93.65	0	481	58.072	16.921	0.815	148.391	11519	1.568	0.638	0.911	0.503741
942	CEP19_KAN631-5_1.tif:0005-0159	2.203	166.158	0	1333	133.038	18.014	0.887	366.023	28413	1.268	0.789	0.929	1.24254
943	CEP19_KAN631-5_1.tif:0006-0181	2.074	188.298	0	1355	106.666	20.535	0.908	390.538	30316	1.486	0.673	0.939	1.32576
944	CEP19_KAN631-5_1.tif:0007-0269	1.623	251.254	0	1858	123.371	30.532	0.932	407.826	31658	1.21	0.826	0.93	1.38445
945	CEP19_KAN631-5_1.tif:0008-0418	1.675	181.085	0	1141	2.687	47.414	0.909	303.261	23541	1.432	0.699	0.945	1.02948
946	CEP19_KAN631-5_1.tif:0009-0453	1.559	114.455	0	524	21.482	51.484	0.88	178.406	13849	1.378	0.726	0.938	0.605635
947	CEP19_KAN631-5_1.tif:0010-0495	2.267	147.955	0	1036	107.449	56.177	0.892	335.454	26040	1.49	0.671	0.946	1.13876
948	CEP19_KAN631-5_1.tif:0011-0541	1.842	129.51	0	486	70.986	61.379	0.866	238.579	18520	1.317	0.759	0.932	0.809904
949	CEP19_KAN631-5_1.tif:0012-0567	1.559	194.397	0	1198	118.769	64.442	0.88	303.016	23522	1.303	0.768	0.927	1.02865
950	CEP19_KAN631-5_1.tif:0013-0590	2.061	225.219	0	1594	95.43	66.99	0.902	464.212	36035	1.425	0.702	0.941	1.57586
951	CEP19_KAN631-5_1.tif:0014-0593	1.031	155.325	0	504	92.257	67.368	0.906	160.075	12426	1.241	0.806	0.947	0.543405
952	CEP19_KAN631-5_1.tif:0015-0605	0.812	213.413	0	1251	49.379	68.674	0.937	173.202	13445	1.039	0.963	0.992	0.587968
953	CEP19_KAN631-5_1.tif:0016-0695	1.662	139.256	0	647	34.363	78.955	0.888	231.417	17964	1.269	0.788	0.956	0.785589
954	CEP19_KAN631-5_1.tif:0017-0809	2.048	126.233	0	977	120.678	91.901	0.853	258.56	20071	1.755	0.57	0.952	0.877731
955	CEP19_KAN631-5_1.tif:0018-0910	1.43	219.126	0	1018	48.784	103.292	0.93	313.335	24323	1.221	0.819	0.969	1.06368
956	CEP19_KAN631-5_1.tif:0019-0944	1.61	199.8	0	1147	91.536	107.165	0.851	321.734	24975	1.301	0.769	0.909	1.09219
957	CEP19_KAN631-5_1.tif:0020-1095	1.327	233.699	0	866	66.175	124.344	0.93	310.089	24071	1.335	0.749	0.976	1.05266
958	CEP19_KAN631-5_1.tif:0021-1097	0.953	159.473	0	624	34.139	124.519	0.948	152.023	11801	1.247	0.802	0.967	0.516073
959	CEP19_KAN631-5_1.tif:0022-1147	1.121	289.793	0	1282	63.044	130.19	0.951	324.787	25212	1.114	0.897	0.983	1.10255
960	CEP19_KAN631-5_1.tif:0023-1183	1.61	182.536	0	939	85.914	134.291	0.963	293.934	22817	1.081	0.925	0.943	0.997817
961	CEP19_KAN631-5_2.tif:0001-0038	1.816	167.702	0	928	117.107	4.337	0.886	304.614	23646	1.325	0.755	0.959	1.03407
962	CEP19_KAN631-5_2.tif:0002-0074	1.597	131.524	0	840	40.305	8.469	0.821	210.097	16309	1.553	0.644	0.902	0.713214
963	CEP19_KAN631-5_2.tif:0003-0091	1.868	130.455	0	540	99.378	10.401	1	243.681	18916	1.081	0.925	0.954	0.827222
964	CEP19_KAN631-5_2.tif:0004-0212	1.378	201.364	0	666	79.902	24.098	0.924	277.561	21546	1.059	0.944	0.947	0.942235
965	CEP19_KAN631-5_2.tif:0005-0211	0.902	27.529	0	239	144.542	23.937	0.947	24.824	1927	1.125	0.889	0.986	0.0842702
966	CEP19_KAN631-5_2.tif:0006-0280	1.469	209.386	0	1270	16.675	31.787	0.9	307.499	23870	1.243	0.805	0.974	1.04387
967	CEP19_KAN631-5_2.tif:0007-0311	1.894	159.741	0	1265	108.046	35.343	0.859	302.501	23482	1.287	0.777	0.907	1.0269
968	CEP19_KAN631-5_2.tif:0008-0545	1.443	120.661	0	617	49.035	61.867	0.722	174.091	13514	1.906	0.525	0.865	0.590985
969	CEP19_KAN631-5_2.tif:0009-0598	1.907	156.568	0	973	71.648	67.862	0.802	298.508	23172	1.461	0.684	0.905	1.01334
970	CEP19_KAN631-5_2.tif:0010-0681	1.971	159.144	0	1155	121.533	77.316	0.85	313.67	24349	1.757	0.569	0.956	1.06481
971	CEP19_KAN631-5_2.tif:0011-0686	1.585	256.959	0	1015	26.793	77.911	0.932	407.156	31606	1.16	0.862	0.972	1.38217
972	CEP19_KAN631-5_2.tif:0012-0719	1.829	183.57	0	1236	92.382	81.662	0.882	335.802	26067	1.321	0.757	0.937	1.13994
973	CEP19_KAN631-5_2.tif:0013-1054	1.108	233.081	0	812	95.748	119.63	0.94	258.225	20045	1.13	0.885	0.977	0.876594
974	CEP19_KAN631-5_3.tif:0001-0011	1.134	156.591	0	783	63.14	1.26	0.917	177.517	13780	1.242	0.805	0.951	0.602618
975	CEP19_KAN631-5_3.tif:0002-0095	1.855	201.681	0	1640	108.624	10.774	0.933	374.126	29042	1.187	0.843	0.935	1.27004
976	CEP19_KAN631-5_3.tif:0003-0121	1.275	307.152	0	1868	144.503	13.798	0.894	391.724	30408	1.072	0.933	0.952	1.32978
977	CEP19_KAN631-5_3.tif:0004-0129	1.739	221.444	0	1684	100.5	14.728	0.919	385.115	29895	1.294	0.773	0.957	1.30735
978	CEP19_KAN631-5_3.tif:0005-0162	1.855	178.771	0	1301	94.198	18.452	0.881	331.628	25743	1.507	0.664	0.98	1.12578
979	CEP19_KAN631-5_3.tif:0006-0167	1.378	169.159	0	720	66.471	18.921	0.924	233.169	18100	1.265	0.791	0.951	0.791537
980	CEP19_KAN631-5_3.tif:0007-0353	1.649	116.758	0	541	80.677	40.13	0.895	192.525	14945	1.341	0.746	0.928	0.653565
981	CEP19_KAN631-5_3.tif:0008-0427	1.52	131.034	0	1114	44.658	48.428	0.894	199.185	15462	1.3	0.769	0.959	0.676174
982	CEP19_KAN631-5_3.tif:0009-0434	1.507	156.547	0	562	137.238	49.214	0.886	235.951	18316	1.332	0.751	0.967	0.800983
983	CEP19_KAN631-5_3.tif:0010-0528	1.713	182.865	0	1342	7.066	59.992	0.968	313.309	24321	1.177	0.85	0.971	1.06359
984	CEP19_KAN631-5_3.tif:0011-0555	1.597	186.677	0	1306	28.794	63.054	0.902	298.198	23148	1.292	0.774	0.939	1.01229
985	CEP19_KAN631-5_3.tif:0012-0565	1.378	169.766	0	973	64.995	64.196	0.896	234.006	18165	1.105	0.905	0.943	0.794379
986	CEP19_KAN631-5_3.tif:0013-0615	1.533	172.294	0	893	134.473	69.782	0.973	264.125	20503	1.145	0.873	0.937	0.896623
987	CEP19_KAN631-5_3.tif:0014-0663	1.494	230.793	0	1287	90.577	75.283	0.905	344.884	26772	1.337	0.748	0.951	1.17077
988	CEP19_KAN631-5_3.tif:0015-0810	1.378	207.168	0	852	59.081	91.981	0.924	285.561	22167	1.137	0.88	0.951	0.969392
989	CEP19_KAN631-5_3.tif:0016-0858	1.147	171.506	0	608	10.872	97.391	0.897	196.635	15264	1.296	0.772	0.957	0.667515
990	CEP19_KAN631-5_3.tif:0017-0949	0.799	160.242	0	810	28.489	107.712	0.96	127.985	9935	1.081	0.925	0.984	0.434471
991	CEP19_KAN631-5_3.tif:0018-1017	1.34	176.606	0	1036	59.061	115.439	0.939	236.608	18367	1.147	0.872	0.972	0.803213
992	CEP19_KAN631-5_3.tif:0019-1080	1.417	224.473	0	1235	81.386	122.589	0.95	318.089	24692	1.25	0.8	0.965	1.07981
993	CEP19_KAN631-5_3.tif:0020-1096	1.069	80.675	0	263	21.627	124.404	0.974	86.26	6696	1.103	0.906	0.96	0.292825
994	CEP19_KAN631-5_3.tif:0021-1122	1.559	181.967	0	1224	127.572	127.426	0.917	283.641	22018	1.134	0.882	0.96	0.962876
995	CEP19_KAN631-5_3.tif:0022-1153	1.366	165.255	0	777	110.969	130.84	0.888	225.658	17517	1.247	0.802	0.946	0.766041
996	CEP19_KAN631-5_4.tif:0001-0028	0.721	248.018	0	1158	80.301	3.178	0.92	178.922	13889	1.143	0.875	1	0.607384
997	CEP19_KAN631-5_4.tif:0002-0039	1.262	139.622	0	414	141.667	4.499	0.913	176.268	13683	1.17	0.854	0.951	0.598376
998	CEP19_KAN631-5_4.tif:0003-0202	1.533	228.017	0	1398	88.922	22.923	0.956	349.547	27134	1.067	0.937	0.96	1.18661
999	CEP19_KAN631-5_4.tif:0004-0337	1.881	139.301	0	713	140.878	38.243	0.907	261.999	20338	1.243	0.805	0.942	0.889408
1000	CEP19_KAN631-5_4.tif:0005-0401	1.443	181.152	0	851	62.926	45.546	0.938	261.368	20289	1.054	0.949	0.966	0.887265
1001	CEP19_KAN631-5_4.tif:0006-0411	1.585	181.837	0	1172	82.125	46.628	0.88	288.124	22366	1.347	0.742	0.972	0.978095
1002	CEP19_KAN631-5_4.tif:0007-0511	1.804	130.757	0	1169	23.032	58.021	0.861	235.823	18306	1.371	0.73	0.9	0.800545
1003	CEP19_KAN631-5_4.tif:0008-0519	1.262	591.857	0	4270	12.485	58.917	0.925	747.196	58002	1.001	0.999	0.99	2.5365
1004	CEP19_KAN631-5_4.tif:0009-0596	1.61	173.712	0	943	132.28	67.746	0.884	279.725	21714	1.271	0.787	0.943	0.949582
1005	CEP19_KAN631-5_4.tif:0010-0606	0.889	214.116	0	409	112.813	68.833	0.933	190.322	14774	1.172	0.853	0.979	0.646086
1006	CEP19_KAN631-5_4.tif:0011-0702	1.585	209.341	0	1340	66.915	79.716	0.932	331.705	25749	1.093	0.915	0.972	1.12604
1007	CEP19_KAN631-5_4.tif:0012-0834	1.765	264.219	0	1742	112.215	94.734	0.932	466.312	36198	1.174	0.852	0.955	1.58299
1008	CEP19_KAN631-5_4.tif:0013-0856	1.533	161.866	0	984	32.546	97.149	0.902	248.138	19262	1.307	0.765	0.964	0.842353
1009	CEP19_KAN631-5_4.tif:0014-0867	1.649	168.898	0	1050	6.56	98.455	0.906	278.501	21619	1.187	0.843	0.952	0.945427
1010	CEP19_KAN631-5_4.tif:0015-0994	1.301	237.455	0	1467	73.296	112.834	0.941	308.955	23983	1.116	0.896	0.967	1.04881
1011	CEP19_KAN631-5_4.tif:0016-1060	1.443	242.589	0	1170	70.45	120.364	0.967	350.011	27170	1.019	0.982	0.97	1.18818
1012	CEP19_KAN631-5_4.tif:0017-1063	1.43	275.802	0	1411	99.119	120.645	0.918	394.377	30614	1.077	0.929	0.937	1.33879
1013	CEP19_KAN631-5_4.tif:0018-1146	1.353	158.21	0	947	24.576	130.128	0.907	214	16612	1.26	0.793	0.942	0.726465
										21898.9				0.957669
														0
														0
CEP89 KO														0
1014	CEP19_KAN631-6_1.tif:0001-0022	1.997	297.426	0	1846	77.661	2.527	0.905	593.885	46101	1.272	0.786	0.945	2.01606
1015	CEP19_KAN631-6_1.tif:0002-0045	2.216	209.372	0	1605	108.467	5.193	0.84	463.916	36012	1.599	0.625	0.964	1.57485
1016	CEP19_KAN631-6_1.tif:0003-0108	1.958	181.539	0	1272	63.665	12.268	0.845	355.473	27594	1.732	0.577	0.956	1.20672
1017	CEP19_KAN631-6_1.tif:0004-0130	0.902	250.414	0	1270	93.013	14.766	0.947	225.813	17529	1.125	0.889	0.986	0.766566
1018	CEP19_KAN631-6_1.tif:0005-0207	0.812	180.635	5	595	94.211	23.501	0.937	146.6	11380	1.039	0.963	0.992	0.497662
1019	CEP19_KAN631-6_1.tif:0006-0380	1.804	301.879	0	2195	121.748	43.235	0.857	544.443	42263	1.333	0.75	0.959	1.84822
1020	CEP19_KAN631-6_1.tif:0007-0430	1.417	125.109	0	701	37.375	48.902	0.95	177.286	13762	1.16	0.862	0.961	0.60183
1021	CEP19_KAN631-6_1.tif:0008-0473	2.332	226.464	0	2023	125.755	53.722	0.896	528.044	40990	1.439	0.695	0.96	1.79255
1022	CEP19_KAN631-6_1.tif:0009-0479	1.456	307.115	0	1447	70.405	54.342	0.892	447.066	34704	1.227	0.815	0.983	1.51765
1023	CEP19_KAN631-6_1.tif:0010-0515	1.237	310.552	0	1525	48.919	58.453	0.967	384.059	29813	1	1	0.98	1.30376
1024	CEP19_KAN631-6_1.tif:0011-0597	1.932	185.34	0	1101	69.296	67.79	0.922	358.139	27801	1.22	0.82	0.938	1.21577
1025	CEP19_KAN631-6_1.tif:0012-0672	0.799	158.194	12	502	56.183	76.272	0.96	126.349	9808	1.081	0.925	0.984	0.428917
1026	CEP19_KAN631-6_1.tif:0013-0722	2.035	223.032	0	1809	131.464	81.998	0.878	453.958	35239	1.349	0.741	0.94	1.54105
1027	CEP19_KAN631-6_1.tif:0014-0801	1.804	131.343	0	795	18.908	90.959	0.87	236.879	18388	1.333	0.75	0.93	0.804131
1028	CEP19_KAN631-6_1.tif:0015-0809	1.932	126.54	0	558	109.398	91.851	0.825	244.518	18981	1.656	0.604	0.915	0.830064
1029	CEP19_KAN631-6_1.tif:0016-0922	0.786	59.344	0	138	127.229	104.667	0.985	46.634	3620	1.033	0.968	0.976	0.158307
1030	CEP19_KAN631-6_1.tif:0017-1007	2.319	171.422	0	1603	73.78	114.327	0.891	397.495	30856	1.341	0.746	0.945	1.34937
1031	CEP19_KAN631-6_1.tif:0018-1012	1.675	214.315	0	1286	17.035	114.916	0.909	358.912	27861	1.234	0.811	0.932	1.2184
1032	CEP19_KAN631-6_1.tif:0019-1066	1.134	167.057	0	554	53.185	120.991	0.93	189.382	14701	1.111	0.9	0.989	0.642894
1033	CEP19_KAN631-6_1.tif:0020-1250	1.597	188.637	0	1127	64.946	141.908	0.863	301.329	23391	1.347	0.742	0.98	1.02292
1034	CEP19_KAN631-6_2.tif:0001-0125	1.688	248.573	0	1682	99.074	14.191	0.981	419.485	32563	1.047	0.955	0.963	1.42402
1035	CEP19_KAN631-6_2.tif:0002-0169	1.919	198.034	0	1268	53.1	19.193	0.94	380.117	29507	1.224	0.817	0.937	1.29038
1036	CEP19_KAN631-6_2.tif:0003-0268	1.945	230.848	0	1635	99.471	30.394	0.819	449.05	34858	1.402	0.713	0.921	1.52439
1037	CEP19_KAN631-6_2.tif:0004-0447	1.958	218.868	0	1701	115.825	50.831	0.866	428.567	33268	1.234	0.811	0.927	1.45485
1038	CEP19_KAN631-6_2.tif:0005-0461	1.623	206.897	0	900	22.321	52.389	0.943	335.827	26069	1.205	0.83	0.951	1.14003
1039	CEP19_KAN631-6_2.tif:0006-0575	1.649	264.047	0	1064	134.043	65.263	0.958	435.394	33798	1.135	0.881	0.962	1.47803
1040	CEP19_KAN631-6_2.tif:0007-0642	1.713	221.865	0	1418	40.317	72.867	0.826	380.129	29508	1.604	0.624	0.914	1.29042
1041	CEP19_KAN631-6_2.tif:0008-0653	2.087	284.049	0	2468	79.688	74.187	0.878	592.79	46016	1.478	0.677	0.964	2.01234
1042	CEP19_KAN631-6_2.tif:0009-0943	1.868	155.634	0	1216	27.655	107.004	0.826	290.714	22567	1.334	0.75	0.898	0.986885
1043	CEP19_KAN631-6_2.tif:0010-0945	1.688	176.863	0	984	102.346	107.218	0.942	298.469	23169	1.113	0.898	0.939	1.01321
1044	CEP19_KAN631-6_2.tif:0011-1075	1.417	277.473	0	1859	55.168	122.029	0.922	393.192	30522	1.234	0.81	0.965	1.33477
1045	CEP19_KAN631-6_2.tif:0012-1228	1.662	183.085	0	1404	108.168	139.439	0.902	304.253	23618	1.302	0.768	0.928	1.03285
1046	CEP19_KAN631-6_3.tif:0001-0041	2.126	220.291	0	1733	134.194	4.72	0.873	468.244	36348	1.28	0.781	0.962	1.58955
1047	CEP19_KAN631-6_3.tif:0002-0091	1.907	197.905	0	1396	69.35	10.374	0.887	377.321	29290	1.254	0.797	0.919	1.28089
1048	CEP19_KAN631-6_3.tif:0003-0104	1.842	179.692	0	1422	7.791	11.855	0.912	331.022	25696	1.465	0.683	0.944	1.12372
1049	CEP19_KAN631-6_3.tif:0004-0232	2.023	159.338	0	961	60.198	26.326	0.885	322.262	25016	1.482	0.675	0.935	1.09398
1050	CEP19_KAN631-6_3.tif:0005-0249	2.126	167.158	0	1063	52.783	28.3	0.865	355.305	27581	1.313	0.761	0.938	1.20615
1051	CEP19_KAN631-6_3.tif:0006-0345	1.932	231.793	0	1464	96.859	39.176	0.957	447.903	34769	1.172	0.853	0.965	1.52049
1052	CEP19_KAN631-6_3.tif:0007-0390	1.366	235.104	0	1435	9.952	44.266	0.899	321.039	24921	1.097	0.912	0.981	1.08983
1053	CEP19_KAN631-6_3.tif:0008-0531	1.881	163.5	0	575	67.122	60.306	0.803	307.512	23871	1.486	0.673	0.872	1.04391
1054	CEP19_KAN631-6_3.tif:0009-0536	1.791	146.23	0	1298	54.164	60.863	0.864	261.845	20326	1.402	0.713	0.924	0.888883
1055	CEP19_KAN631-6_3.tif:0010-0617	2.087	167.457	0	993	121.532	70.067	0.849	349.47	27128	1.573	0.636	0.928	1.18634
1056	CEP19_KAN631-6_3.tif:0011-0674	1.546	191.183	0	1067	31.848	76.507	0.936	295.545	22942	1.331	0.751	0.968	1.00328
1057	CEP19_KAN631-6_3.tif:0012-0737	2.177	183.325	0	1334	103.204	83.665	0.886	399.118	30982	1.421	0.704	0.952	1.35488
1058	CEP19_KAN631-6_3.tif:0013-0744	2.01	186.147	0	1456	135.08	84.431	0.817	374.088	29039	1.576	0.634	0.912	1.26991
1059	CEP19_KAN631-6_3.tif:0014-0848	1.056	91.598	0	316	118.901	96.238	0.962	96.759	7511	1.166	0.858	0.959	0.328466
1060	CEP19_KAN631-6_3.tif:0015-0872	1.649	144.805	0	468	68.544	99.01	0.881	238.773	18535	1.485	0.673	0.959	0.81056
1061	CEP19_KAN631-6_3.tif:0016-0883	1.894	169.313	0	1397	86.425	100.195	0.837	320.626	24889	1.449	0.69	0.922	1.08843
1062	CEP19_KAN631-6_3.tif:0017-0939	1.585	256.959	0	1663	37.144	106.572	0.921	407.156	31606	1.508	0.663	0.961	1.38217
1063	CEP19_KAN631-6_3.tif:0018-0965	1.572	124.098	0	1070	144.399	109.567	0.924	195.037	15140	1.099	0.91	0.968	0.662092
1064	CEP19_KAN631-6_3.tif:0019-0981	0.992	179.364	0	401	3.41	111.349	0.917	177.917	13811	1.277	0.783	0.981	0.603973
1065	CEP19_KAN631-6_3.tif:0020-1069	1.34	54.615	0	173	124.236	121.368	0.956	73.171	5680	1.316	0.76	0.963	0.248394
1066	CEP19_KAN631-6_3.tif:0021-1111	1.61	163.8	0	1139	96.406	126.102	0.837	263.764	20475	1.499	0.667	0.947	0.895399
1067	CEP19_KAN631-6_3.tif:0022-1218	1.018	221.253	18	615	52.267	138.3	0.941	225.169	17479	1.064	0.94	0.988	0.76438
1068	CEP19_KAN631-6_3.tif:0023-1273	1.172	128.396	0	856	12.12	144.573	0.917	150.516	11684	1.238	0.808	0.973	0.510957
1069	CEP19_KAN631-6_4.tif:0001-0047	1.778	240.116	0	1685	29.222	5.403	0.924	426.866	33136	1.189	0.841	0.986	1.44908
1070	CEP19_KAN631-6_4.tif:0002-0165	2.048	264.987	0	1897	143.417	18.778	0.915	542.768	42133	1.361	0.735	0.985	1.84253
1071	CEP19_KAN631-6_4.tif:0003-0244	1.791	211.345	0	983	55.275	27.746	0.921	378.442	29377	1.304	0.767	0.959	1.28469
1072	CEP19_KAN631-6_4.tif:0004-0291	1.804	189.957	0	1313	138.813	33.09	0.927	342.591	26594	1.28	0.781	0.966	1.16299
1073	CEP19_KAN631-6_4.tif:0005-0306	2.164	206.411	0	1251	73.757	34.708	0.893	446.718	34677	1.177	0.849	0.921	1.51647
1074	CEP19_KAN631-6_4.tif:0006-0321	2.306	242.257	0	2267	101.276	36.529	0.886	558.626	43364	1.325	0.755	0.95	1.89636
1075	CEP19_KAN631-6_4.tif:0007-0330	1.765	186.445	0	1402	9.077	37.4	0.897	329.051	25543	1.292	0.774	0.923	1.11703
1076	CEP19_KAN631-6_4.tif:0008-0336	0.799	199.113	0	1210	26.673	38.136	0.96	159.031	12345	1.081	0.925	0.984	0.539863
1077	CEP19_KAN631-6_4.tif:0009-0416	1.971	139.725	0	1014	12.701	47.31	0.871	275.397	21378	1.581	0.633	0.942	0.934888
1078	CEP19_KAN631-6_4.tif:0010-0486	0.721	244.75	0	1344	98.688	55.161	0.92	176.564	13706	1.143	0.875	1	0.599381
1079	CEP19_KAN631-6_4.tif:0011-0507	0.902	221.743	0	1254	89.098	57.601	0.947	199.958	15522	1.146	0.873	0.986	0.678797
1080	CEP19_KAN631-6_4.tif:0012-0517	1.353	201.952	0	507	106.657	58.666	0.919	273.168	21205	1.122	0.891	0.981	0.927323
1081	CEP19_KAN631-6_4.tif:0013-0615	2.345	170.604	0	875	125.092	69.853	0.86	399.994	31050	1.647	0.607	0.968	1.35786
1082	CEP19_KAN631-6_4.tif:0014-0682	0.812	196.873	6	557	81.941	77.413	0.937	159.779	12403	1.039	0.963	0.992	0.5424
1083	CEP19_KAN631-6_4.tif:0015-0699	1.984	189.656	0	1533	58.857	79.351	0.856	376.252	29207	1.44	0.695	0.936	1.27726
1084	CEP19_KAN631-6_4.tif:0016-0750	1.031	57.2	0	214	16.761	85.155	0.906	58.949	4576	1.146	0.873	0.947	0.200115
1085	CEP19_KAN631-6_4.tif:0017-0838	2.035	245.544	0	1813	57.565	95.096	0.84	499.78	38796	1.275	0.784	0.895	1.6966
1086	CEP19_KAN631-6_4.tif:0018-0931	2.422	321.191	0	1174	109.622	105.649	0.943	777.882	60384	1.142	0.876	0.945	2.64067
1087	CEP19_KAN631-6_4.tif:0019-0961	2.138	194.554	0	1699	124.289	109.056	0.87	416.045	32296	1.413	0.708	0.938	1.41235
1088	CEP19_KAN631-6_4.tif:0020-0987	1.366	190.406	0	1153	4.634	112.083	0.888	260.002	20183	1.194	0.838	0.951	0.882629
1089	CEP19_KAN631-6_4.tif:0021-1005	1.224	66.716	0	174	100.169	114.085	0.944	81.648	6338	1.359	0.736	0.95	0.277169
1090	CEP19_KAN631-6_4.tif:0022-1018	1.494	205.81	0	1211	33.423	115.58	0.879	307.551	23874	1.342	0.745	0.959	1.04404
1091	CEP19_KAN631-6_4.tif:0023-1028	1.005	56.949	0	210	127.619	116.65	0.949	57.223	4442	1.155	0.866	0.945	0.194255
1092	CEP19_KAN631-6_4.tif:0024-1140	1.005	139.949	0	478	13.4	129.383	0.841	140.623	10916	1.593	0.628	0.886	0.477371
1093	CEP19_KAN631-6_4.tif:0025-1161	0.76	58.085	0	125	67.374	131.771	0.898	44.147	3427	1.345	0.743	0.922	0.149867
1094	CEP19_KAN631-6_4.tif:0026-1166	1.907	165.865	0	1189	43.872	132.418	0.874	316.234	24548	1.405	0.712	0.949	1.07352
1095	CEP19_KAN631-6_4.tif:0027-1249	1.585	159.496	0	945	142.542	141.801	0.793	252.724	19618	1.39	0.719	0.885	0.857921
1096	CEP19_KAN631-6_4.tif:0028-1254	1.404	217.138	0	1186	67.456	142.393	0.875	304.897	23668	1.401	0.714	0.924	1.03503
										24887.7				1.08837
														0
														0
CCDC92 KO														0
1097	CEP19_KAN631-7_1.tif:0001-0154	1.507	224.658	0	1119	110.285	17.486	0.851	338.61	26285	1.452	0.689	0.936	1.14948
1098	CEP19_KAN631-7_1.tif:0002-0181	1.752	239.897	0	1619	84.989	20.566	0.926	420.296	32626	1.2	0.833	0.948	1.42678
1099	CEP19_KAN631-7_1.tif:0003-0230	1.018	221.165	0	940	86.998	26.162	0.941	225.079	17472	1.064	0.94	0.988	0.764074
1100	CEP19_KAN631-7_1.tif:0004-0279	1.662	120.93	0	845	3.088	31.632	0.802	200.963	15600	1.786	0.56	0.908	0.682209
1101	CEP19_KAN631-7_1.tif:0005-0297	1.842	160.203	0	1369	35.938	33.7	0.835	295.12	22909	1.565	0.639	0.917	1.00184
1102	CEP19_KAN631-7_1.tif:0006-0340	1.804	233.85	0	1388	106.881	38.631	0.917	421.752	32739	1.315	0.76	0.94	1.43172
1103	CEP19_KAN631-7_1.tif:0007-0360	2.332	207.928	0	1305	83.942	40.877	0.856	484.824	37635	1.487	0.672	0.948	1.64583
1104	CEP19_KAN631-7_1.tif:0008-0359	0.721	210.304	0	931	103.001	40.747	0.92	151.714	11777	1.143	0.875	1	0.515024
1105	CEP19_KAN631-7_1.tif:0009-0371	1.997	269.935	0	2412	66.419	42.148	0.861	538.993	41840	1.453	0.688	0.945	1.82972
1106	CEP19_KAN631-7_1.tif:0010-0454	1.881	208.699	0	1391	136.991	51.59	0.862	392.522	30470	1.418	0.705	0.945	1.33249
1107	CEP19_KAN631-7_1.tif:0011-0561	1.469	153.123	0	553	46.091	63.715	0.916	224.873	17456	1.368	0.731	0.942	0.763374
1108	CEP19_KAN631-7_1.tif:0012-0584	2.177	211.101	0	1593	117.451	66.376	0.865	459.587	35676	1.578	0.634	0.96	1.56016
1109	CEP19_KAN631-7_1.tif:0013-0760	1.597	171.718	0	1158	58.065	86.21	0.831	274.302	21293	1.499	0.667	0.958	0.931171
1110	CEP19_KAN631-7_1.tif:0014-0788	2.332	181.188	0	1590	117.01	89.449	0.887	422.473	32795	1.302	0.768	0.926	1.43417
1111	CEP19_KAN631-7_1.tif:0015-0934	2.357	188.831	0	1722	94.52	106.11	0.812	445.159	34556	1.549	0.646	0.91	1.51118
1112	CEP19_KAN631-7_1.tif:0016-1181	1.43	195.955	0	1152	104.86	134.037	0.891	280.202	21751	1.135	0.881	0.917	0.9512
1113	CEP19_KAN631-7_1.tif:0017-1228	1.842	160.958	0	1213	141.346	139.432	0.783	296.511	23017	1.727	0.579	0.947	1.00656
1114	CEP19_KAN631-7_2.tif:0001-0019	1.456	266.389	0	1556	122.313	2.212	0.919	387.782	30102	1.08	0.926	0.97	1.3164
1115	CEP19_KAN631-7_2.tif:0002-0168	1.855	155.361	0	616	74.16	19.026	0.885	288.202	22372	1.309	0.764	0.911	0.978357
1116	CEP19_KAN631-7_2.tif:0003-0230	1.881	211.836	0	1457	108.051	26.116	0.982	398.422	30928	1.223	0.817	0.954	1.35252
1117	CEP19_KAN631-7_2.tif:0004-0297	1.597	244.234	0	1240	136.8	33.733	0.913	390.139	30285	1.178	0.849	0.98	1.3244
1118	CEP19_KAN631-7_2.tif:0005-0365	1.198	216.925	0	788	48.158	41.5	0.937	259.887	20174	1.207	0.828	0.974	0.882236
1119	CEP19_KAN631-7_2.tif:0006-0377	1.623	164.198	0	1067	86.987	42.826	0.892	266.521	20689	1.329	0.752	0.951	0.904757
1120	CEP19_KAN631-7_2.tif:0007-0408	2.151	167.898	0	1492	110.373	46.276	0.909	361.205	28039	1.265	0.791	0.923	1.22618
1121	CEP19_KAN631-7_2.tif:0008-0503	2.035	272.044	0	2046	120.248	57.116	0.878	553.718	42983	1.477	0.677	0.963	1.8797
1122	CEP19_KAN631-7_2.tif:0009-0560	1.778	186.384	0	1082	20.863	63.542	0.914	331.344	25721	1.301	0.769	0.958	1.12481
1123	CEP19_KAN631-7_2.tif:0010-0647	1.842	174.601	0	1069	68.158	73.481	0.889	321.644	24968	1.194	0.837	0.944	1.09188
1124	CEP19_KAN631-7_2.tif:0011-0757	1.752	151.669	0	958	107.181	85.93	0.868	265.722	20627	1.291	0.774	0.928	0.902046
1125	CEP19_KAN631-7_2.tif:0012-0782	1.404	231.89	0	1317	16.932	88.828	0.971	325.612	25276	1.067	0.937	0.965	1.10535
1126	CEP19_KAN631-7_2.tif:0013-0844	1.7	257.568	0	1517	139.785	95.85	0.923	437.984	33999	1.157	0.864	0.946	1.48682
1127	CEP19_KAN631-7_2.tif:0014-0920	1.752	262.904	0	1776	58.811	104.466	0.951	460.605	35755	1.184	0.845	0.951	1.56361
1128	CEP19_KAN631-7_2.tif:0015-0999	1.043	164.272	0	989	1.232	113.432	0.95	171.411	13306	1.14	0.877	0.953	0.581889
1129	CEP19_KAN631-7_2.tif:0016-1014	1.327	157.777	0	647	76.669	115.146	0.69	209.349	16251	2.245	0.445	0.866	0.710678
1130	CEP19_KAN631-7_2.tif:0017-1057	1.456	157.77	0	703	108.287	119.994	0.881	229.665	17828	1.273	0.785	0.926	0.779642
1131	CEP19_KAN631-7_2.tif:0018-1198	1.469	106.64	0	577	28.325	135.959	0.916	156.61	12157	1.248	0.801	0.938	0.531642
1132	CEP19_KAN631-7_2.tif:0019-1255	1.636	150.189	0	876	118.259	142.442	0.819	245.716	19074	1.67	0.599	0.937	0.834131
1133	CEP19_KAN631-7_3.tif:0001-0099	1.739	233.911	0	1565	84.406	11.251	0.919	406.796	31578	1.152	0.868	0.944	1.38095
1134	CEP19_KAN631-7_3.tif:0002-0150	1.842	178.224	0	1293	116.468	17.008	0.912	328.317	25486	1.253	0.798	0.941	1.11454
1135	CEP19_KAN631-7_3.tif:0003-0456	1.855	157.174	0	514	121.753	51.819	0.895	291.564	22633	1.417	0.706	0.95	0.989771
1136	CEP19_KAN631-7_3.tif:0004-0540	1.881	144.76	0	1102	20.931	61.32	0.844	272.266	21135	1.532	0.653	0.896	0.924261
1137	CEP19_KAN631-7_3.tif:0005-0604	2.28	158.492	0	900	103.292	68.57	0.856	361.386	28053	1.234	0.81	0.932	1.22679
1138	CEP19_KAN631-7_3.tif:0006-0721	1.804	185.407	0	1219	82.793	81.855	0.879	334.385	25957	1.544	0.648	0.969	1.13513
1139	CEP19_KAN631-7_3.tif:0007-0742	2.177	111.432	0	1205	127.033	84.181	0.837	242.599	18832	1.575	0.635	0.931	0.823548
1140	CEP19_KAN631-7_3.tif:0008-0885	1.404	151.174	0	836	33.882	100.483	0.902	212.274	16478	1.288	0.777	0.928	0.720605
1141	CEP19_KAN631-7_3.tif:0009-0926	2.061	177.219	0	1498	94.214	105.085	0.902	365.276	28355	1.253	0.798	0.92	1.24
1142	CEP19_KAN631-7_3.tif:0010-0988	1.507	161.59	0	683	126.119	112.179	0.94	243.552	18906	1.129	0.886	0.951	0.826784
1143	CEP19_KAN631-7_3.tif:0011-1085	2.126	136.085	0	937	55.918	123.173	0.817	289.258	22454	1.188	0.842	0.889	0.981943
1144	CEP19_KAN631-7_3.tif:0012-1124	1.082	98.131	0	398	101.543	127.563	0.906	106.188	8243	1.513	0.661	0.949	0.360477
1145	CEP19_KAN631-7_3.tif:0013-1245	1.597	172.823	0	1003	82.904	141.351	0.928	276.067	21430	1.342	0.745	0.947	0.937162
1146	CEP19_KAN631-7_4.tif:0001-0096	1.443	223.241	0	783	48.52	10.936	0.911	322.095	25003	1.129	0.885	0.966	1.09341
1147	CEP19_KAN631-7_4.tif:0002-0111	1.533	136.697	0	418	141.544	12.581	0.917	209.556	16267	1.418	0.705	0.948	0.711377
1148	CEP19_KAN631-7_4.tif:0003-0237	1.559	299.248	0	1347	68.872	26.963	0.972	466.453	36209	1.092	0.916	0.964	1.58347
1149	CEP19_KAN631-7_4.tif:0004-0371	0.812	171.333	16	442	118.147	42.115	0.937	139.051	10794	1.039	0.963	0.992	0.472036
1150	CEP19_KAN631-7_4.tif:0005-0417	1.108	170.337	0	952	5.461	47.332	0.927	188.712	14649	1.232	0.812	0.935	0.64062
1151	CEP19_KAN631-7_4.tif:0006-0419	1.804	242.179	0	1343	103.471	47.567	0.927	436.773	33905	1.065	0.939	0.956	1.48271
1152	CEP19_KAN631-7_4.tif:0007-0488	1.443	141.188	0	895	51.059	55.38	0.955	203.707	15813	1.137	0.879	0.937	0.691523
1153	CEP19_KAN631-7_4.tif:0008-0492	0.721	196.143	0	555	86.487	55.899	0.92	141.499	10984	1.143	0.875	1	0.480345
1154	CEP19_KAN631-7_4.tif:0009-0566	1.443	192.071	0	709	119.326	64.259	0.899	277.123	21512	1.179	0.848	0.933	0.940748
1155	CEP19_KAN631-7_4.tif:0010-0599	1.739	238.407	0	1363	70.523	68.055	0.861	414.615	32185	1.353	0.739	0.912	1.40749
1156	CEP19_KAN631-7_4.tif:0011-0601	0.915	190.648	0	531	118.444	68.208	0.924	174.374	13536	1.13	0.885	0.993	0.591947
1157	CEP19_KAN631-7_4.tif:0012-0617	0.799	192.871	6	749	112.365	70.03	0.96	154.046	11958	1.081	0.925	0.984	0.522939
1158	CEP19_KAN631-7_4.tif:0013-0620	0.812	233.095	0	851	120.657	70.376	0.937	189.176	14685	1.039	0.963	0.992	0.642194
1159	CEP19_KAN631-7_4.tif:0014-0718	1.649	188.852	0	1202	127.93	81.51	0.958	311.403	24173	1.028	0.973	0.948	1.05712
1160	CEP19_KAN631-7_4.tif:0015-0786	1.688	251.046	0	1878	55.822	89.228	0.892	423.659	32887	1.172	0.853	0.929	1.43819
1161	CEP19_KAN631-7_4.tif:0016-0816	1.494	115.422	0	717	21.855	92.669	0.864	172.48	13389	1.444	0.692	0.996	0.585519
1162	CEP19_KAN631-7_4.tif:0017-0920	1.688	222.55	0	1129	90.876	104.432	0.902	375.569	29154	1.209	0.827	0.967	1.27494
1163	CEP19_KAN631-7_4.tif:0018-1034	1.198	247.441	0	1400	61.749	117.371	0.937	296.446	23012	1.027	0.974	0.964	1.00635
1164	CEP19_KAN631-7_4.tif:0019-1174	1.121	169.149	0	762	14.479	133.304	0.938	189.575	14716	1.278	0.782	0.946	0.64355
1165	CEP19_KAN631-7_4.tif:0020-1215	1.675	148.369	0	1256	58.371	137.81	0.767	248.473	19288	1.363	0.734	0.884	0.84349
										23624.5				1.03313
														0
														0
ANKRD26 KO														0
1166	CEP19_KAN631-8_1.tif:0001-0068	1.572	207.516	0	1311	52.324	7.712	0.863	326.14	25317	1.249	0.8	0.924	1.10715
1167	CEP19_KAN631-8_1.tif:0002-0088	1.147	93.876	0	231	98.521	10.013	0.959	107.631	8355	1.024	0.976	0.952	0.365375
1168	CEP19_KAN631-8_1.tif:0003-0104	1.739	249.919	0	1857	3.971	11.78	0.861	434.634	33739	1.357	0.737	0.9	1.47545
1169	CEP19_KAN631-8_1.tif:0004-0183	1.159	212.244	0	678	48.003	20.784	0.907	246.077	19102	1.07	0.935	0.947	0.835356
1170	CEP19_KAN631-8_1.tif:0005-0261	1.804	197.586	0	811	90.78	29.699	0.893	356.349	27662	1.36	0.735	0.943	1.2097
1171	CEP19_KAN631-8_1.tif:0006-0295	2.035	215.032	0	1838	112.002	33.481	0.947	437.675	33975	1.154	0.866	0.955	1.48577
1172	CEP19_KAN631-8_1.tif:0007-0311	1.095	231.694	0	1140	2.629	35.367	0.929	253.703	19694	1.089	0.918	0.971	0.861245
1173	CEP19_KAN631-8_1.tif:0008-0381	1.185	203.967	0	746	126.847	43.283	0.959	241.735	18765	1.215	0.823	0.968	0.820618
1174	CEP19_KAN631-8_1.tif:0009-0388	1.172	164.571	0	798	81.435	44.082	0.917	192.925	14976	1.293	0.773	0.963	0.65492
1175	CEP19_KAN631-8_1.tif:0010-0442	1.585	214.325	0	756	64.258	50.184	0.87	339.602	26362	1.524	0.656	0.939	1.15284
1176	CEP19_KAN631-8_1.tif:0011-0496	1.997	216.419	0	1412	85.259	56.293	0.853	432.135	33545	1.285	0.779	0.909	1.46697
1177	CEP19_KAN631-8_1.tif:0012-0536	1.237	190.958	0	1002	50.944	60.922	0.986	236.157	18332	1.091	0.917	0.95	0.801682
1178	CEP19_KAN631-8_1.tif:0013-0631	1.134	296.705	0	1318	43.017	71.665	0.93	336.356	26110	1.111	0.9	0.989	1.14182
1179	CEP19_KAN631-8_1.tif:0014-0671	1.391	179.491	0	753	136.958	76.207	0.894	249.722	19385	1.18	0.847	0.931	0.847732
1180	CEP19_KAN631-8_1.tif:0015-0754	1.353	264.257	0	1220	92.743	85.651	0.948	357.444	27747	1.1	0.909	0.981	1.21341
1181	CEP19_KAN631-8_1.tif:0016-0815	1.018	274.886	0	1218	34.334	92.559	0.941	279.751	21716	1.064	0.94	0.988	0.949669
1182	CEP19_KAN631-8_1.tif:0017-0832	1.391	165.778	0	1024	82.488	94.555	0.867	230.644	17904	1.43	0.699	0.927	0.782965
1183	CEP19_KAN631-8_1.tif:0018-0921	0.799	150.79	0	651	48.238	104.534	0.96	120.436	9349	1.081	0.925	0.984	0.408844
1184	CEP19_KAN631-8_1.tif:0019-0955	1.881	247.384	0	1696	140.962	108.466	0.884	465.281	36118	1.419	0.705	0.954	1.57949
1185	CEP19_KAN631-8_1.tif:0020-1013	1.43	226.288	0	992	69.756	115.047	0.947	323.576	25118	1.2	0.833	0.937	1.09844
1186	CEP19_KAN631-8_1.tif:0021-1131	1.649	237.492	0	1523	133.003	128.423	0.931	391.608	30399	1.119	0.893	0.962	1.32939
1187	CEP19_KAN631-8_1.tif:0022-1157	1.069	177.217	0	611	67.384	131.282	0.94	189.485	14709	1.158	0.864	0.976	0.643244
1188	CEP19_KAN631-8_1.tif:0023-1168	1.147	153.73	0	438	51.118	132.613	0.897	176.255	13682	1.315	0.76	0.952	0.598332
1189	CEP19_KAN631-8_1.tif:0024-1262	1.018	214.62	0	772	30.134	143.305	0.941	218.419	16955	1.001	0.999	0.988	0.741464
1190	CEP19_KAN631-8_2.tif:0001-0095	1.52	275.983	0	1874	32.814	10.841	0.92	419.523	32566	1.303	0.768	0.959	1.42415
1191	CEP19_KAN631-8_2.tif:0002-0124	1.765	197.832	0	1294	85.816	14.089	0.884	349.148	27103	1.509	0.663	0.961	1.18525
1192	CEP19_KAN631-8_2.tif:0003-0227	2.035	206.209	0	1643	117.49	25.765	0.961	419.717	32581	1.187	0.843	0.924	1.42481
1193	CEP19_KAN631-8_2.tif:0004-0319	1.984	251.825	0	2006	55.703	36.216	0.856	499.587	38781	1.701	0.588	0.966	1.69594
1194	CEP19_KAN631-8_2.tif:0005-0416	1.301	261.01	0	1412	41.374	47.199	0.9	339.602	26362	1.193	0.838	0.922	1.15284
1195	CEP19_KAN631-8_2.tif:0006-0546	1.301	192.713	0	548	143.734	62.003	0.972	250.74	19464	1.111	0.9	0.967	0.851186
1196	CEP19_KAN631-8_2.tif:0007-0624	1.919	244.564	0	1412	132.923	70.888	0.902	469.429	36440	1.345	0.743	0.958	1.59357
1197	CEP19_KAN631-8_2.tif:0008-0655	1.417	221.791	0	1099	111.047	74.395	1	314.288	24397	1.058	0.945	0.965	1.06691
1198	CEP19_KAN631-8_2.tif:0009-0713	1.546	290.067	0	1839	97.492	81	0.964	448.405	34808	1.209	0.827	0.968	1.5222
1199	CEP19_KAN631-8_2.tif:0010-0737	1.275	237.404	0	967	59.252	83.655	0.905	302.772	23503	1.025	0.975	0.995	1.02782
1200	CEP19_KAN631-8_2.tif:0011-0819	1.34	208.096	0	1237	73.166	93.001	0.956	278.798	21642	1.073	0.932	0.945	0.946433
1201	CEP19_KAN631-8_2.tif:0012-0830	1.185	173.098	0	694	15.075	94.283	0.897	205.15	15925	1.256	0.796	0.963	0.696421
1202	CEP19_KAN631-8_2.tif:0013-0896	1.404	184.339	0	904	110.181	101.71	0.971	258.843	20093	1.203	0.831	0.969	0.878693
1203	CEP19_KAN631-8_2.tif:0014-0964	1.507	197.034	0	1160	94	109.393	0.956	296.975	23053	1.219	0.82	0.936	1.00814
1204	CEP19_KAN631-8_2.tif:0015-0991	1.507	235.436	0	1344	66.663	112.485	0.912	354.855	27546	1.335	0.749	0.971	1.20462
1205	CEP19_KAN631-8_2.tif:0016-1043	1.262	127.01	0	680	46.486	118.397	0.943	160.345	12447	1.246	0.803	0.951	0.544324
1206	CEP19_KAN631-8_2.tif:0017-1260	1.481	230.513	0	1529	93.849	143.06	0.924	341.496	26509	1.191	0.84	0.947	1.15927
1207	CEP19_KAN631-8_3.tif:0001-0012	1.881	214.986	0	1521	122.566	1.34	0.884	404.348	31388	1.253	0.798	0.936	1.37264
1208	CEP19_KAN631-8_3.tif:0002-0032	1.726	217.328	0	1121	91.416	3.675	0.912	375.157	29122	1.288	0.776	0.944	1.27354
1209	CEP19_KAN631-8_3.tif:0003-0150	0.915	182.718	0	608	108.897	17.031	0.924	167.121	12973	1.13	0.885	0.993	0.567326
1210	CEP19_KAN631-8_3.tif:0004-0153	1.675	195.923	0	973	13.799	17.383	0.909	328.111	25470	1.294	0.773	0.929	1.11384
1211	CEP19_KAN631-8_3.tif:0005-0324	1.726	190.933	0	1043	81.627	36.766	0.937	329.592	25585	1.32	0.758	0.954	1.11887
1212	CEP19_KAN631-8_3.tif:0006-0499	1.005	240.256	0	904	61.642	56.626	0.896	241.413	18740	1.265	0.791	0.987	0.819525
1213	CEP19_KAN631-8_3.tif:0007-0516	1.134	252.989	0	1202	136.835	58.566	0.93	286.798	22263	1.111	0.9	0.989	0.97359
1214	CEP19_KAN631-8_3.tif:0008-0618	1.211	91.628	0	292	19.881	70.133	0.947	110.955	8613	1.093	0.915	0.974	0.376658
1215	CEP19_KAN631-8_3.tif:0009-0659	1.353	178.667	0	1031	10.574	74.795	0.935	241.671	18760	1.272	0.786	0.95	0.820399
1216	CEP19_KAN631-8_3.tif:0010-0697	0.721	173.839	21	364	53.515	79.11	0.92	125.409	9735	1.143	0.875	1	0.425724
1217	CEP19_KAN631-8_3.tif:0011-0805	1.533	284.479	0	1580	75.254	91.419	0.985	436.103	33853	1.096	0.912	0.964	1.48044
1218	CEP19_KAN631-8_3.tif:0012-0863	1.134	264.58	0	1074	119.639	97.997	0.899	299.937	23283	1.129	0.885	0.989	1.0182
1219	CEP19_KAN631-8_3.tif:0013-0882	1.211	255.468	0	1296	21.121	100.107	0.947	309.354	24014	1.098	0.91	0.974	1.05016
1220	CEP19_KAN631-8_3.tif:0014-0895	1.237	257.208	0	1084	51.302	101.583	0.967	318.089	24692	1	1	0.98	1.07981
1221	CEP19_KAN631-8_3.tif:0015-1034	0.721	173.589	0	590	14.869	117.416	0.92	125.228	9721	1.143	0.875	1	0.425112
1222	CEP19_KAN631-8_3.tif:0016-1068	1.301	198.257	0	757	124.136	121.197	0.972	257.954	20024	1.142	0.876	0.971	0.875676
1223	CEP19_KAN631-8_3.tif:0017-1141	1.275	199.838	0	1061	78.874	129.596	0.922	254.862	19784	1.117	0.895	0.957	0.86518
1224	CEP19_KAN631-8_3.tif:0018-1256	1.056	140.463	0	355	13.558	142.575	0.928	148.378	11518	1.428	0.7	0.965	0.503697
1225	CEP19_KAN631-8_4.tif:0001-0016	1.61	172.176	0	829	112.879	1.867	0.936	277.252	21522	1.306	0.766	0.947	0.941185
1226	CEP19_KAN631-8_4.tif:0002-0025	1.559	199.215	0	1111	52.855	2.832	0.917	310.527	24105	1.144	0.874	0.964	1.05414
1227	CEP19_KAN631-8_4.tif:0003-0084	1.623	166.524	0	925	83.582	9.571	0.844	270.295	20982	1.395	0.717	0.947	0.91757
1228	CEP19_KAN631-8_4.tif:0004-0243	1.314	284.775	0	1511	68.696	27.626	0.921	374.191	29047	1.179	0.848	0.967	1.27026
1229	CEP19_KAN631-8_4.tif:0005-0343	1.52	170.339	0	1053	114.706	38.983	0.92	258.933	20100	1.156	0.865	0.955	0.878999
1230	CEP19_KAN631-8_4.tif:0006-0346	1.881	211.514	0	1542	52.369	39.304	0.917	397.817	30881	1.159	0.863	0.97	1.35047
1231	CEP19_KAN631-8_4.tif:0007-0380	0.837	98.492	0	229	14.845	43.182	0.99	82.472	6402	1.137	0.88	0.956	0.279968
1232	CEP19_KAN631-8_4.tif:0008-0475	1.778	217.87	0	1388	131.437	53.957	0.914	387.318	30066	1.237	0.808	0.968	1.31483
1233	CEP19_KAN631-8_4.tif:0009-0517	1.572	227.303	0	1170	80.181	58.662	0.951	357.238	27731	1.177	0.85	0.976	1.21271
1234	CEP19_KAN631-8_4.tif:0010-0532	1.907	146.203	0	989	99.824	60.397	0.92	278.746	21638	1.165	0.859	0.964	0.946258
1235	CEP19_KAN631-8_4.tif:0011-0602	1.159	161.967	0	940	42.54	68.316	0.938	187.785	14577	1.075	0.93	0.952	0.637471
1236	CEP19_KAN631-8_4.tif:0012-0754	1.881	275.808	0	1862	83.311	85.635	0.917	518.743	40268	1.287	0.777	0.977	1.76097
1237	CEP19_KAN631-8_4.tif:0013-0800	1.649	182.75	0	700	107.492	90.797	0.958	301.342	23392	1.03	0.971	0.955	1.02296
1238	CEP19_KAN631-8_4.tif:0014-0825	1.662	138.357	0	761	23.433	93.676	0.913	229.922	17848	1.272	0.786	0.959	0.780517
1239	CEP19_KAN631-8_4.tif:0015-0904	1.391	152.417	0	1095	53.564	102.606	0.962	212.055	16461	1.224	0.817	0.956	0.719861
1240	CEP19_KAN631-8_4.tif:0016-1083	1.095	237.153	0	974	27.765	122.906	0.929	259.68	20158	1.185	0.844	0.977	0.881536
1241	CEP19_KAN631-8_4.tif:0017-1094	0.992	176.286	33	408	57.643	124.154	0.885	174.864	13574	1.286	0.778	0.981	0.593609
1242	CEP19_KAN631-8_4.tif:0018-1155	1.842	155.811	0	1025	106.812	131.039	0.889	287.029	22281	1.198	0.834	0.929	0.974377
										22763.7				0.995488
														0
														0
TTBK2 KO														0
1243	CEP19_KAN631-9_1.tif:0001-0090	1.417	43.373	0	131	43.737	10.197	0.938	61.461	4771	1.281	0.78	0.936	0.208642
1244	CEP19_KAN631-9_1.tif:0002-0165	1.481	20.704	0	123	23.028	18.802	0.924	30.673	2381	1.303	0.768	0.958	0.104124
1245	CEP19_KAN631-9_1.tif:0003-0232	0.721	188.589	0	840	133.419	26.332	0.92	136.049	10561	1.143	0.875	1	0.461846
1246	CEP19_KAN631-9_1.tif:0004-0268	1.056	13.305	0	75	118.63	30.475	0.997	14.055	1091	1.104	0.906	0.965	0.0477109
1247	CEP19_KAN631-9_1.tif:0005-0290	0.863	28.687	0	108	62.134	32.897	0.942	24.76	1922	1.149	0.87	0.964	0.0840516
1248	CEP19_KAN631-9_1.tif:0006-0414	1.585	62.642	0	274	115.616	47.026	0.976	99.258	7705	1.198	0.835	0.946	0.33695
1249	CEP19_KAN631-9_1.tif:0007-0436	1.134	22	0	77	17.705	49.495	0.982	24.94	1936	1.14	0.878	0.946	0.0846638
1250	CEP19_KAN631-9_1.tif:0008-0485	1.134	29.125	0	101	0.765	55.135	0.875	33.017	2563	1.523	0.657	0.917	0.112083
1251	CEP19_KAN631-9_1.tif:0009-0493	1.25	20.732	0	117	91.583	55.996	0.964	25.906	2011	1.09	0.918	0.951	0.0879437
1252	CEP19_KAN631-9_1.tif:0010-0562	0.928	24.042	0	100	144.632	63.773	0.923	22.299	1731	1.21	0.827	0.96	0.0756989
1253	CEP19_KAN631-9_1.tif:0011-0656	1.43	16.045	0	67	78.234	74.499	0.902	22.943	1781	1.056	0.947	0.961	0.0778855
1254	CEP19_KAN631-9_1.tif:0012-0807	0.966	16.64	0	43	123.676	91.618	0.926	16.077	1248	1.102	0.907	0.968	0.0545767
1255	CEP19_KAN631-9_1.tif:0013-0901	1.095	40.329	0	152	91.203	102.348	0.845	44.16	3428	1.534	0.652	0.899	0.149911
1256	CEP19_KAN631-9_1.tif:0014-0935	1.147	29.73	0	210	132.428	106.099	0.959	34.086	2646	1.04	0.962	0.957	0.115713
1257	CEP19_KAN631-9_1.tif:0015-1029	0.889	26.913	0	73	61.454	116.786	0.97	23.922	1857	1.129	0.886	0.979	0.0812091
1258	CEP19_KAN631-9_1.tif:0016-1105	0.979	25.487	0	85	128.098	125.409	0.892	24.953	1937	1.192	0.839	0.927	0.0847076
1259	CEP19_KAN631-9_1.tif:0017-1160	1.185	18.837	0	89	114.174	131.677	0.914	22.325	1733	1.154	0.867	0.92	0.0757864
1260	CEP19_KAN631-9_1.tif:0018-1250	0.747	20.569	0	50	8.667	141.926	0.977	15.369	1193	1.306	0.765	0.967	0.0521715
1261	CEP19_KAN631-9_2.tif:0001-0081	1.636	38.929	0	151	43.971	9.178	0.967	63.69	4944	1.106	0.904	0.93	0.216208
1262	CEP19_KAN631-9_2.tif:0002-0098	1.082	12.845	0	77	98.961	11.189	0.985	13.9	1079	1.121	0.892	0.971	0.0471861
1263	CEP19_KAN631-9_2.tif:0003-0106	1.327	29.845	0	128	18.666	12.044	0.96	39.6	3074	1.096	0.913	0.972	0.13443
1264	CEP19_KAN631-9_2.tif:0004-0140	1.147	20.393	0	74	76.029	15.896	0.959	23.381	1815	1.154	0.867	0.952	0.0793723
1265	CEP19_KAN631-9_2.tif:0005-0196	1.327	20.67	0	144	50.031	22.297	0.96	27.426	2129	1.104	0.906	0.976	0.093104
1266	CEP19_KAN631-9_2.tif:0006-0203	1.288	36.66	0	99	115.711	23.031	0.903	47.226	3666	1.348	0.742	0.966	0.160319
1267	CEP19_KAN631-9_2.tif:0007-0248	0.889	197.522	3	701	76.391	28.2	0.933	175.572	13629	1.172	0.853	0.979	0.596014
1268	CEP19_KAN631-9_2.tif:0008-0285	0.721	183.536	0	840	73.037	32.348	0.92	132.404	10278	1.143	0.875	1	0.44947
1269	CEP19_KAN631-9_2.tif:0009-0290	0.721	230.286	0	936	76.102	32.915	0.92	166.13	12896	1.143	0.875	1	0.563959
1270	CEP19_KAN631-9_2.tif:0010-0314	1.005	233.692	0	1022	128.091	35.69	0.963	234.818	18228	1.032	0.969	0.981	0.797134
1271	CEP19_KAN631-9_2.tif:0011-0337	1.494	20.879	0	129	10.45	38.307	0.989	31.201	2422	1.116	0.896	0.951	0.105917
1272	CEP19_KAN631-9_2.tif:0012-0487	1.533	23.63	0	115	94.714	55.286	0.944	36.225	2812	1.055	0.948	0.937	0.122972
1273	CEP19_KAN631-9_2.tif:0013-0501	0.683	25.717	0	67	47.96	56.871	0.993	17.559	1363	1.148	0.871	0.972	0.0596058
1274	CEP19_KAN631-9_2.tif:0014-0521	1.301	27.228	0	87	127.36	59.175	0.959	35.426	2750	1.22	0.82	0.944	0.120261
1275	CEP19_KAN631-9_2.tif:0015-0643	1.546	17	0	95	26.061	73.046	0.964	26.28	2040	1.109	0.902	0.968	0.0892119
1276	CEP19_KAN631-9_2.tif:0016-0655	0.812	186.254	0	929	137.228	74.349	0.937	151.16	11734	1.039	0.963	0.992	0.513143
1277	CEP19_KAN631-9_2.tif:0017-0665	1.018	24.127	0	82	2.368	75.495	0.882	24.554	1906	1.242	0.805	0.888	0.0833519
1278	CEP19_KAN631-9_2.tif:0018-0692	1.327	24.922	0	128	119.366	78.558	0.901	33.069	2567	1.119	0.894	0.967	0.112258
1279	CEP19_KAN631-9_2.tif:0019-0759	1.366	18.16	0	74	21.81	86.213	0.944	24.798	1925	1.089	0.918	0.942	0.0841828
1280	CEP19_KAN631-9_2.tif:0020-0808	1.031	11.238	0	86	54.244	91.773	0.906	11.581	899	1.215	0.823	0.947	0.0393145
1281	CEP19_KAN631-9_2.tif:0021-0857	0.812	206.54	0	1066	41.648	97.276	0.937	167.624	13012	1.039	0.963	0.992	0.569032
1282	CEP19_KAN631-9_2.tif:0022-0873	0.76	30.305	0	100	111.691	99.09	0.994	23.033	1788	1.034	0.967	0.959	0.0781916
1283	CEP19_KAN631-9_2.tif:0023-0928	1.069	27.735	0	78	77.962	105.409	0.974	29.655	2302	1.182	0.846	0.965	0.100669
1284	CEP19_KAN631-9_2.tif:0024-1091	1.005	13.513	0	59	33.945	123.897	0.984	13.578	1054	1.11	0.901	0.945	0.0460928
1285	CEP19_KAN631-9_3.tif:0001-0023	1.404	12.404	0	59	92.988	2.675	0.913	17.417	1352	1.155	0.866	0.956	0.0591247
1286	CEP19_KAN631-9_3.tif:0002-0046	1.043	44.383	0	149	83.255	5.215	0.985	46.312	3595	1.161	0.861	0.959	0.157214
1287	CEP19_KAN631-9_3.tif:0003-0099	1.056	33.146	0	122	138.846	11.296	0.948	35.014	2718	1.294	0.773	0.921	0.118862
1288	CEP19_KAN631-9_3.tif:0004-0232	1.378	23.888	0	143	137.096	26.33	0.953	32.927	2556	1.199	0.834	0.951	0.111777
1289	CEP19_KAN631-9_3.tif:0005-0290	1.043	30.321	0	137	108.001	32.927	0.95	31.639	2456	1.234	0.811	0.959	0.107404
1290	CEP19_KAN631-9_3.tif:0006-0421	1.327	12.602	0	83	89.803	47.799	0.947	16.721	1298	1.207	0.829	0.945	0.0567632
1291	CEP19_KAN631-9_3.tif:0007-0508	0.837	18.6	0	67	46.424	57.708	0.951	15.575	1209	1.268	0.789	0.963	0.0528712
1292	CEP19_KAN631-9_3.tif:0008-0538	0.94	12.658	0	75	28.433	61.123	0.972	11.903	924	1.109	0.901	0.954	0.0404077
1293	CEP19_KAN631-9_3.tif:0009-0613	1.378	12.037	0	45	133.203	69.575	0.885	16.592	1288	1.218	0.821	0.911	0.0563259
1294	CEP19_KAN631-9_3.tif:0010-0673	1.198	15	0	58	93.911	76.442	0.937	17.971	1395	1.231	0.812	0.969	0.0610052
1295	CEP19_KAN631-9_3.tif:0011-0675	0.696	28.019	0	88	6.938	76.659	0.926	19.491	1513	1.152	0.868	0.982	0.0661655
1296	CEP19_KAN631-9_3.tif:0012-0760	1.031	24.387	0	81	25.062	86.232	0.939	25.133	1951	1.225	0.817	0.958	0.0853198
1297	CEP19_KAN631-9_3.tif:0013-0915	0.721	194.643	0	765	73.832	103.853	0.92	140.417	10900	1.143	0.875	1	0.476671
1298	CEP19_KAN631-9_3.tif:0014-1015	1.327	568.194	0	4920	57.49	115.196	0.93	753.921	58524	1.124	0.89	0.967	2.55933
1299	CEP19_KAN631-9_3.tif:0015-1107	1.069	7.193	0	40	75.142	125.581	0.895	7.691	597	1.046	0.956	0.922	0.0261076
1300	CEP19_KAN631-9_4.tif:0001-0049	1.031	14.662	0	54	140.239	5.532	0.906	15.111	1173	1.207	0.829	0.952	0.0512968
1301	CEP19_KAN631-9_4.tif:0002-0180	0.721	174.875	12	587	107.485	20.487	0.92	126.156	9793	1.143	0.875	1	0.428261
1302	CEP19_KAN631-9_4.tif:0003-0195	1.391	45.944	0	137	41.603	22.217	0.933	63.922	4962	1.103	0.907	0.96	0.216995
1303	CEP19_KAN631-9_4.tif:0004-0210	1.623	21.992	0	87	33.659	23.916	0.943	35.697	2771	1.232	0.812	0.947	0.121179
1304	CEP19_KAN631-9_4.tif:0005-0217	1.417	17.9	0	77	114.588	24.663	0.95	25.365	1969	1.027	0.974	0.961	0.086107
1305	CEP19_KAN631-9_4.tif:0006-0315	1.108	214.407	0	786	40.69	35.753	0.974	237.536	18439	1.11	0.901	0.977	0.806362
1306	CEP19_KAN631-9_4.tif:0007-0460	1.121	43.897	0	115	101.463	52.202	0.938	49.197	3819	1.042	0.96	0.935	0.16701
1307	CEP19_KAN631-9_4.tif:0008-0484	1.082	22.714	0	100	31.48	55.008	0.937	24.579	1908	1.42	0.704	0.939	0.0834394
1308	CEP19_KAN631-9_4.tif:0009-0496	0.799	22.177	0	111	0.668	56.285	0.922	17.713	1375	1.071	0.934	0.984	0.0601306
1309	CEP19_KAN631-9_4.tif:0010-0543	1.069	26.687	0	129	70.551	61.691	0.895	28.534	2215	1.502	0.666	0.933	0.0968649
1310	CEP19_KAN631-9_4.tif:0011-0563	0.928	273.042	6	1207	66.057	63.957	0.903	253.252	19659	1.125	0.889	1	0.859714
1311	CEP19_KAN631-9_4.tif:0012-0576	1.494	12.983	0	58	93.859	65.44	0.989	19.401	1506	1.094	0.914	0.951	0.0658594
1312	CEP19_KAN631-9_4.tif:0013-0576	0.94	22.027	0	85	134.396	65.383	0.901	20.715	1608	1.314	0.761	0.954	0.07032
1313	CEP19_KAN631-9_4.tif:0014-0680	1.301	26.842	0	169	12.898	77.163	0.941	34.924	2711	1.086	0.921	0.962	0.118556
1314	CEP19_KAN631-9_4.tif:0015-0828	1.378	53.234	0	255	77.125	94.026	0.984	73.377	5696	1	1	0.955	0.249094
1315	CEP19_KAN631-9_4.tif:0016-0837	0.76	14.237	0	59	134.431	95.068	0.953	10.821	840	1.357	0.737	0.967	0.0367343
1316	CEP19_KAN631-9_4.tif:0017-0874	1.121	23.69	0	82	33.976	99.274	0.877	26.55	2061	1.314	0.761	0.935	0.0901302
1317	CEP19_KAN631-9_4.tif:0018-0918	1.172	22.022	0	163	101.804	104.199	0.948	25.816	2004	1.171	0.854	0.963	0.0876376
1318	CEP19_KAN631-9_4.tif:0019-1124	1.069	13.867	0	66	47.332	127.562	0.959	14.827	1151	1.2	0.833	0.933	0.0503347
1319	CEP19_KAN631-9_4.tif:0020-1174	1.507	14.838	0	94	105.76	133.228	0.94	22.364	1736	1.087	0.92	0.955	0.0759176
										4577.65				0.200187
														0
														0
INPP5E KO														0
1	CEP19_KAN631-10_1.tif:0001-0058	0.812	180.984	0	943	98.865	6.577	0.937	146.883	11402	1.039	0.963	0.992	0.498624
2	CEP19_KAN631-10_1.tif:0002-0108	1.52	131.653	0	406	88.253	12.258	0.92	200.126	15535	1.182	0.846	0.948	0.679366
3	CEP19_KAN631-10_1.tif:0003-0116	1.031	46.388	0	159	64.6	13.214	0.939	47.806	3711	1.413	0.708	0.958	0.162287
4	CEP19_KAN631-10_1.tif:0004-0170	1.804	148.471	0	968	94.257	19.384	0.87	267.77	20786	1.122	0.891	0.924	0.908999
5	CEP19_KAN631-10_1.tif:0005-0238	1.469	214.018	0	1084	126.797	27.089	0.916	314.301	24398	1.174	0.852	0.95	1.06696
6	CEP19_KAN631-10_1.tif:0006-0247	1.855	269.382	0	1841	23.9	28.044	0.929	499.715	38791	1.106	0.904	0.963	1.69638
7	CEP19_KAN631-10_1.tif:0007-0261	1.585	257.951	0	1430	73.794	29.686	0.932	408.728	31728	1.296	0.771	0.98	1.38751
8	CEP19_KAN631-10_1.tif:0008-0285	1.597	409.831	0	3027	33.093	32.348	0.939	654.663	50819	1.097	0.912	0.973	2.22238
9	CEP19_KAN631-10_1.tif:0009-0372	1.752	242.154	0	1583	55.755	42.26	0.951	424.251	32933	1.267	0.789	0.958	1.4402
10	CEP19_KAN631-10_1.tif:0010-0383	1.121	262.069	0	1097	22.137	43.543	0.919	293.715	22800	1.121	0.892	0.983	0.997074
11	CEP19_KAN631-10_1.tif:0011-0499	1.391	201.769	0	1006	13.789	56.725	0.962	280.717	21791	1.139	0.878	0.96	0.952949
12	CEP19_KAN631-10_1.tif:0012-0525	1.855	243.861	0	1782	104.951	59.636	0.895	452.373	35116	1.119	0.894	0.938	1.53567
13	CEP19_KAN631-10_1.tif:0013-0553	1.958	177.724	0	1348	116.469	62.787	0.875	348.001	27014	1.276	0.784	0.956	1.18136
14	CEP19_KAN631-10_1.tif:0014-0604	1.224	216.295	0	1213	25.481	68.611	0.926	264.705	20548	1.259	0.794	0.979	0.898591
15	CEP19_KAN631-10_1.tif:0015-0631	1.262	279.163	0	1557	74.231	71.705	0.974	352.433	27358	1.164	0.859	0.966	1.1964
16	CEP19_KAN631-10_1.tif:0016-0677	1.34	358.529	0	1807	80.576	76.886	0.969	480.341	37287	1.108	0.903	0.977	1.63061
17	CEP19_KAN631-10_1.tif:0017-0731	1.997	217.826	0	1738	36.293	83.028	0.853	434.943	33763	1.277	0.783	0.901	1.4765
18	CEP19_KAN631-10_1.tif:0018-0751	1.61	165.224	0	824	122.738	85.323	0.91	266.057	20653	1.326	0.754	0.947	0.903183
19	CEP19_KAN631-10_1.tif:0019-0792	1.185	218.5	0	1131	136.37	89.892	0.781	258.959	20102	1.847	0.541	0.939	0.879087
20	CEP19_KAN631-10_1.tif:0020-0898	1.597	198.427	0	1283	44.708	101.926	0.902	316.968	24605	1.223	0.818	0.943	1.07601
21	CEP19_KAN631-10_1.tif:0021-0900	2.01	234.929	0	1189	76.465	102.186	0.898	472.122	36649	1.365	0.733	0.981	1.60271
22	CEP19_KAN631-10_1.tif:0022-0982	1.353	139.171	0	868	25.075	111.481	0.819	188.248	14613	1.548	0.646	0.905	0.639046
23	CEP19_KAN631-10_1.tif:0023-1001	1.481	195.287	0	1081	87.47	113.629	0.924	289.31	22458	1.117	0.895	0.947	0.982118
24	CEP19_KAN631-10_1.tif:0024-1084	1.378	209.925	0	1123	122.148	123.035	0.953	289.361	22462	1.271	0.787	0.96	0.982293
25	CEP19_KAN631-10_1.tif:0025-1114	1.507	126.393	0	849	45.821	126.448	0.876	190.503	14788	1.344	0.744	0.918	0.646699
26	CEP19_KAN631-10_1.tif:0026-1114	0.915	215.113	0	903	80.137	126.489	0.924	196.751	15273	1.13	0.885	0.993	0.667908
27	CEP19_KAN631-10_1.tif:0027-1236	1.34	171.971	0	1019	50.397	140.306	0.927	230.399	17885	1.29	0.775	0.937	0.782135
28	CEP19_KAN631-10_2.tif:0001-0091	1.366	162.236	0	496	69.822	10.334	0.862	221.536	17197	1.285	0.778	0.946	0.752047
29	CEP19_KAN631-10_2.tif:0002-0270	1.907	138.966	0	1049	75.065	30.749	0.783	264.949	20567	1.716	0.583	0.922	0.899422
30	CEP19_KAN631-10_2.tif:0003-0292	2.035	195.766	0	1606	129.35	33.158	0.801	398.461	30931	1.489	0.672	0.883	1.35265
31	CEP19_KAN631-10_2.tif:0004-0369	1.018	208.557	0	466	140.558	41.938	0.941	212.248	16476	1.001	0.999	0.988	0.720517
32	CEP19_KAN631-10_2.tif:0005-0385	2.138	156.217	0	1178	138.052	43.715	0.913	334.063	25932	1.297	0.771	0.941	1.13404
33	CEP19_KAN631-10_2.tif:0006-0394	1.623	225.746	0	1502	70.979	44.741	0.917	366.423	28444	1.26	0.794	0.958	1.24389
34	CEP19_KAN631-10_2.tif:0007-0409	1.984	218.773	0	1708	61.474	46.422	0.899	434.016	33691	1.403	0.713	0.942	1.47335
35	CEP19_KAN631-10_2.tif:0008-0416	1.404	341.661	0	2162	103.094	47.263	0.942	479.748	37241	1.125	0.889	0.956	1.6286
36	CEP19_KAN631-10_2.tif:0009-0417	1.469	236.377	0	1324	44.411	47.394	0.889	347.138	26947	1.224	0.817	0.934	1.17843
37	CEP19_KAN631-10_2.tif:0010-0447	1.108	204.779	3	793	8.059	50.791	0.974	226.869	17611	1.11	0.901	0.977	0.770152
38	CEP19_KAN631-10_2.tif:0011-0570	1.752	236.691	0	1396	137.607	64.677	0.926	414.68	32190	1.166	0.857	0.951	1.40771
39	CEP19_KAN631-10_2.tif:0012-0696	1.224	120.274	0	444	43.089	79.005	0.944	147.193	11426	1.261	0.793	0.941	0.499674
40	CEP19_KAN631-10_2.tif:0013-0768	1.765	147.234	0	1003	112.312	87.197	0.851	259.848	20171	1.349	0.741	0.913	0.882104
41	CEP19_KAN631-10_2.tif:0014-0779	1.327	168.864	0	817	31.793	88.439	0.852	224.061	17393	1.461	0.684	0.9	0.760619
42	CEP19_KAN631-10_2.tif:0015-0845	1.675	156.477	0	695	141.205	95.945	0.909	262.051	20342	1.22	0.82	0.932	0.889582
43	CEP19_KAN631-10_2.tif:0016-0922	1.469	213.833	0	1131	8.104	104.651	0.785	314.031	24377	1.35	0.741	0.891	1.06604
44	CEP19_KAN631-10_2.tif:0017-1021	1.816	174.872	0	654	105.716	115.862	0.876	317.638	24657	1.309	0.764	0.934	1.07828
45	CEP19_KAN631-10_2.tif:0018-1067	1.147	181.719	0	886	7.399	121.103	0.897	208.345	16173	1.197	0.835	0.942	0.707267
46	CEP19_KAN631-10_2.tif:0019-1078	1.623	177.278	0	1204	43.328	122.377	0.813	287.751	22337	1.541	0.649	0.9	0.976826
47	CEP19_KAN631-10_2.tif:0020-1124	1.314	156.784	0	533	137.324	127.614	0.938	206.013	15992	1.254	0.798	0.936	0.699351
48	CEP19_KAN631-10_2.tif:0021-1132	1.327	102.369	0	435	106.551	128.457	0.852	135.83	10544	1.446	0.692	0.9	0.461103
49	CEP19_KAN631-10_2.tif:0022-1137	1.572	138.213	0	642	129.599	129.131	0.888	217.221	16862	1.343	0.745	0.931	0.737397
50	CEP19_KAN631-10_2.tif:0023-1257	1.353	192.457	0	888	87.908	142.749	0.819	260.325	20208	1.388	0.72	0.901	0.883722
51	CEP19_KAN631-10_3.tif:0001-0044	1.713	185.481	0	1279	16.949	5.069	0.858	317.792	24669	1.388	0.721	0.937	1.07881
52	CEP19_KAN631-10_3.tif:0002-0046	1.855	149.319	0	645	109.822	5.269	0.943	276.994	21502	1.121	0.892	0.941	0.940311
53	CEP19_KAN631-10_3.tif:0003-0129	1.675	102.231	0	425	64.396	14.662	0.935	171.205	13290	1.09	0.918	0.932	0.581189
54	CEP19_KAN631-10_3.tif:0004-0175	1.417	201.118	0	830	4.093	19.866	0.894	284.994	22123	1.313	0.762	0.961	0.967468
55	CEP19_KAN631-10_3.tif:0005-0321	2.422	191.691	0	1872	91.12	36.395	0.861	464.251	36038	1.393	0.718	0.933	1.57599
56	CEP19_KAN631-10_3.tif:0006-0395	1.649	162.727	0	631	52.118	44.856	0.881	268.324	20829	1.443	0.693	0.962	0.91088
57	CEP19_KAN631-10_3.tif:0007-0498	2.023	233.911	0	1722	90.635	56.528	0.894	473.088	36724	1.405	0.712	0.949	1.60599
58	CEP19_KAN631-10_3.tif:0008-0506	1.894	108.395	0	566	133.622	57.383	0.859	205.266	15934	1.239	0.807	0.905	0.696815
59	CEP19_KAN631-10_3.tif:0009-0577	1.533	183.319	0	1241	18.189	65.56	0.876	281.026	21815	1.38	0.725	0.964	0.953999
60	CEP19_KAN631-10_3.tif:0010-0701	1.056	80.756	0	252	99.256	79.541	0.997	85.306	6622	1.104	0.906	0.965	0.289589
61	CEP19_KAN631-10_3.tif:0011-0777	0.915	48.746	0	133	49.17	88.186	0.982	44.585	3461	1.26	0.794	0.953	0.151354
62	CEP19_KAN631-10_3.tif:0012-0779	1.791	157.511	0	862	139.503	88.454	0.792	282.044	21894	1.33	0.752	0.871	0.957453
63	CEP19_KAN631-10_3.tif:0013-0860	1.597	274.226	0	1840	71.31	97.659	0.955	438.048	34004	1.189	0.841	0.943	1.48704
64	CEP19_KAN631-10_3.tif:0014-0867	1.147	222.921	0	1242	13.264	98.408	0.959	255.584	19840	1.119	0.894	0.952	0.867629
65	CEP19_KAN631-10_3.tif:0015-0892	1.842	162.287	0	1042	100.103	101.28	0.866	298.958	23207	1.306	0.766	0.935	1.01487
66	CEP19_KAN631-10_3.tif:0016-0973	1.623	152.992	0	631	46.632	110.441	0.892	248.331	19277	1.275	0.784	0.944	0.843009
67	CEP19_KAN631-10_3.tif:0017-1047	1.507	191.162	0	871	87.573	118.809	0.94	288.124	22366	1.197	0.835	0.955	0.978095
68	CEP19_KAN631-10_3.tif:0018-1240	1.095	189.012	0	581	89.487	140.758	0.929	206.966	16066	1.137	0.88	0.971	0.702587
69	CEP19_KAN631-10_4.tif:0001-0187	1.804	216.214	0	1354	59.078	21.224	0.927	389.946	30270	1.112	0.899	0.956	1.32375
70	CEP19_KAN631-10_4.tif:0002-0191	1.791	209.719	0	1340	109.539	21.672	0.921	375.531	29151	1.283	0.779	0.965	1.27481
71	CEP19_KAN631-10_4.tif:0003-0220	1.507	118.214	0	521	137.672	25.024	0.94	178.174	13831	1.262	0.793	0.959	0.604848
72	CEP19_KAN631-10_4.tif:0004-0309	1.804	279.214	0	1974	46.859	35.152	0.927	503.567	39090	1.296	0.771	0.966	1.70946
73	CEP19_KAN631-10_4.tif:0005-0452	0.721	161.804	0	712	64.241	51.359	0.92	116.726	9061	1.143	0.875	1	0.396249
74	CEP19_KAN631-10_4.tif:0006-0454	0.67	100.673	0	214	15.687	51.573	0.932	67.439	5235	1.184	0.844	0.963	0.228933
75	CEP19_KAN631-10_4.tif:0007-0472	0.902	198.543	0	879	68.497	53.583	0.947	179.038	13898	1.125	0.889	0.986	0.607778
76	CEP19_KAN631-10_4.tif:0008-0505	1.456	164.726	0	837	22.808	57.365	0.935	239.79	18614	1.297	0.771	0.946	0.814015
77	CEP19_KAN631-10_4.tif:0009-0558	1.623	265.19	0	1433	92.23	63.43	0.917	430.448	33414	1.154	0.866	0.944	1.46124
78	CEP19_KAN631-10_4.tif:0010-0562	0.67	108.635	27	189	51.529	63.844	0.932	72.772	5649	1.25	0.8	0.963	0.247038
79	CEP19_KAN631-10_4.tif:0011-0568	1.378	192.168	0	649	120.475	64.463	0.936	264.885	20562	1.102	0.907	0.986	0.899203
80	CEP19_KAN631-10_4.tif:0012-0761	1.378	231.813	0	1266	16.791	86.385	0.924	319.531	24804	1.211	0.826	0.951	1.08471
81	CEP19_KAN631-10_4.tif:0013-0769	1.623	229.762	0	1645	87.322	87.355	0.917	372.941	28950	1.205	0.83	0.951	1.26602
82	CEP19_KAN631-10_4.tif:0014-0871	1.469	188.886	0	865	26.82	98.828	0.943	277.394	21533	1.31	0.763	0.95	0.941666
83	CEP19_KAN631-10_4.tif:0015-0997	1.688	174.458	0	861	88.15	113.154	0.916	294.411	22854	1.318	0.759	0.932	0.999436
84	CEP19_KAN631-10_4.tif:0016-1038	1.713	172.669	0	1115	28.288	117.75	0.871	295.841	22965	1.45	0.69	0.914	1.00429
85	CEP19_KAN631-10_4.tif:0017-1229	1.082	215.488	0	736	101.289	139.479	0.919	233.182	18101	1.13	0.885	0.966	0.791581
86	CEP19_KAN631-10_4.tif:0018-1258	1.443	129.848	0	775	43.937	142.801	0.911	187.347	14543	1.245	0.803	0.966	0.635985
										22385.6				0.978952
														0
														0
KIZ KO														0
87	CEP19_KAN631-11_1.tif:0001-0007	1.842	147.811	0	1054	34.112	0.767	0.795	272.292	21137	1.578	0.634	0.914	0.924349
88	CEP19_KAN631-11_1.tif:0002-0105	1.829	216.345	0	1255	82.493	11.981	0.93	395.756	30721	1.182	0.846	0.94	1.34347
89	CEP19_KAN631-11_1.tif:0003-0184	1.649	261.203	0	1400	47.061	20.943	0.931	430.705	33434	1.269	0.788	0.955	1.46211
90	CEP19_KAN631-11_1.tif:0004-0208	1.237	234.5	0	682	14.869	23.617	0.936	290.005	22512	1.049	0.953	0.98	0.984479
91	CEP19_KAN631-11_1.tif:0005-0235	1.675	244.4	0	1239	103.306	26.695	0.92	409.295	31772	1.243	0.805	0.974	1.38943
92	CEP19_KAN631-11_1.tif:0006-0287	1.559	115.198	0	407	63.172	32.509	0.833	179.566	13939	1.503	0.665	0.938	0.609571
93	CEP19_KAN631-11_1.tif:0007-0306	1.572	193.402	0	1144	88.277	34.818	0.84	303.957	23595	1.457	0.686	0.935	1.03184
94	CEP19_KAN631-11_1.tif:0008-0320	2.164	123.643	0	640	53.137	36.315	0.805	267.59	20772	1.758	0.569	0.903	0.908387
95	CEP19_KAN631-11_1.tif:0009-0435	0.889	162.449	0	439	81.272	49.434	0.933	144.397	11209	1.172	0.853	0.979	0.490184
96	CEP19_KAN631-11_1.tif:0010-0454	1.855	141.396	0	596	108.636	51.52	0.85	262.296	20361	1.691	0.591	0.954	0.890413
97	CEP19_KAN631-11_1.tif:0011-0542	2.087	154.043	0	928	18.062	61.536	0.841	321.477	24955	1.356	0.738	0.905	1.09132
98	CEP19_KAN631-11_1.tif:0012-0569	0.902	207.771	11	645	27.183	64.582	0.947	187.359	14544	1.146	0.873	0.986	0.636028
99	CEP19_KAN631-11_1.tif:0013-0681	1.34	164.144	0	531	72.322	77.303	0.927	219.913	17071	1.315	0.76	0.945	0.746537
100	CEP19_KAN631-11_1.tif:0014-0737	1.005	200.103	0	961	82.474	83.712	0.929	201.066	15608	1.026	0.975	0.981	0.682558
101	CEP19_KAN631-11_1.tif:0015-0748	2.087	202.401	0	1549	50.327	84.948	0.9	422.396	32789	1.433	0.698	0.97	1.43391
102	CEP19_KAN631-11_1.tif:0016-0761	1.997	136.555	0	725	138.506	86.33	0.861	272.666	21166	1.337	0.748	0.934	0.925617
103	CEP19_KAN631-11_1.tif:0017-0865	1.919	194.087	0	1553	84.418	98.273	0.902	372.542	28919	1.36	0.736	0.961	1.26467
104	CEP19_KAN631-11_1.tif:0018-0874	1.945	206.715	0	1113	114.419	99.247	0.882	402.107	31214	1.636	0.611	0.938	1.36503
105	CEP19_KAN631-11_1.tif:0019-0946	1.417	286.191	0	1561	49.6	107.379	0.95	405.546	31481	1.225	0.816	0.965	1.37671
106	CEP19_KAN631-11_1.tif:0020-1056	1.636	164.008	0	1084	10.046	119.881	0.731	268.324	20829	1.929	0.518	0.885	0.91088
107	CEP19_KAN631-11_1.tif:0021-1128	1.34	189.058	0	1045	58.139	128.038	0.846	253.291	19662	1.409	0.71	0.941	0.859845
108	CEP19_KAN631-11_1.tif:0022-1146	1.52	205.924	0	1210	129.506	130.132	0.92	313.026	24299	1.164	0.859	0.952	1.06263
109	CEP19_KAN631-11_1.tif:0023-1148	1.494	226.034	0	1393	101.159	130.346	0.932	337.773	26220	1.206	0.829	0.959	1.14664
110	CEP19_KAN631-11_1.tif:0024-1213	1.288	219.09	0	1250	23.229	137.677	0.932	282.237	21909	1.178	0.849	0.962	0.958109
111	CEP19_KAN631-11_1.tif:0025-1250	1.056	88.573	0	426	39.367	141.908	0.928	93.564	7263	1.382	0.724	0.97	0.317621
112	CEP19_KAN631-11_2.tif:0001-0107	1.198	70.688	0	260	89.437	12.195	0.866	84.688	6574	1.481	0.675	0.944	0.28749
113	CEP19_KAN631-11_2.tif:0002-0160	1.739	269.193	0	1837	7.348	18.218	0.929	468.154	36341	1.179	0.848	0.975	1.58924
114	CEP19_KAN631-11_2.tif:0003-0196	1.649	202.117	0	1358	10.95	22.272	0.921	333.277	25871	1.371	0.729	0.931	1.13137
115	CEP19_KAN631-11_2.tif:0004-0264	1.919	167.349	0	1053	32.043	29.952	0.879	321.219	24935	1.576	0.635	0.974	1.09044
116	CEP19_KAN631-11_2.tif:0005-0501	1.958	221.691	0	1946	53.559	56.888	0.77	434.093	33697	1.44	0.694	0.849	1.47361
117	CEP19_KAN631-11_2.tif:0006-0529	1.52	224.746	0	1332	11.144	60.089	0.948	341.637	26520	1.305	0.766	0.967	1.15975
118	CEP19_KAN631-11_2.tif:0007-0533	1.829	207.563	0	1368	79.185	60.559	0.93	379.691	29474	1.244	0.804	0.944	1.28894
119	CEP19_KAN631-11_2.tif:0008-0656	1.907	184.743	0	1343	52.463	74.552	0.757	352.227	27342	1.811	0.552	0.902	1.1957
120	CEP19_KAN631-11_2.tif:0009-0752	1.945	210	0	1541	84.766	85.43	0.869	408.496	31710	1.39	0.72	0.965	1.38672
121	CEP19_KAN631-11_2.tif:0010-0759	1.469	159.395	0	737	118.991	86.191	0.955	234.083	18171	1.055	0.948	0.974	0.794642
122	CEP19_KAN631-11_2.tif:0011-0879	1.804	205.143	0	1442	108.455	99.748	0.927	369.978	28720	1.255	0.797	0.962	1.25596
123	CEP19_KAN631-11_2.tif:0012-0969	1.469	292.184	0	1809	70.08	110.045	0.943	429.095	33309	1.121	0.892	0.95	1.45665
124	CEP19_KAN631-11_2.tif:0013-1029	1.494	117.853	0	584	143.005	116.782	0.821	176.113	13671	1.682	0.594	0.924	0.597851
125	CEP19_KAN631-11_2.tif:0014-1045	1.739	215.874	0	1442	39.002	118.629	0.839	375.427	29143	1.309	0.764	0.9	1.27446
126	CEP19_KAN631-11_2.tif:0015-1216	1.417	102.227	0	476	89.963	138.017	0.91	144.861	11245	1.285	0.778	0.921	0.491759
127	CEP19_KAN631-11_3.tif:0001-0017	1.585	137.545	0	498	82.42	1.933	0.976	217.942	16918	1.217	0.821	0.957	0.739846
128	CEP19_KAN631-11_3.tif:0002-0221	1.894	179.694	0	1361	16.11	25.153	0.829	340.285	26415	1.5	0.666	0.896	1.15516
129	CEP19_KAN631-11_3.tif:0003-0226	1.894	196.959	0	1452	82.95	25.633	0.928	372.98	28953	1.309	0.764	0.948	1.26615
130	CEP19_KAN631-11_3.tif:0004-0241	1.881	306.596	0	2104	44.323	27.402	0.907	576.648	44763	1.274	0.785	0.942	1.95754
131	CEP19_KAN631-11_3.tif:0005-0268	1.005	201.923	0	615	3.405	30.418	0.929	202.895	15750	1.259	0.794	0.987	0.688768
132	CEP19_KAN631-11_3.tif:0006-0287	1.623	252.508	0	1174	103.853	32.593	0.943	409.862	31816	1.132	0.883	0.947	1.39136
133	CEP19_KAN631-11_3.tif:0007-0442	1.43	124.901	0	376	47.152	50.21	0.808	178.6	13864	1.515	0.66	0.884	0.606291
134	CEP19_KAN631-11_3.tif:0008-0531	1.391	167.704	0	717	39.581	60.314	0.933	233.323	18112	1.027	0.974	0.947	0.792062
135	CEP19_KAN631-11_3.tif:0009-0558	2.538	198.538	0	1626	91.855	63.285	0.874	503.851	39112	1.211	0.826	0.921	1.71042
136	CEP19_KAN631-11_3.tif:0010-0602	1.881	207.103	0	1611	69.768	68.347	0.907	389.521	30237	1.243	0.805	0.942	1.3223
137	CEP19_KAN631-11_3.tif:0011-0641	1.417	162.418	0	789	0.938	72.701	0.883	230.154	17866	1.372	0.729	0.928	0.781304
138	CEP19_KAN631-11_3.tif:0012-0817	2.1	107.178	0	476	38.1	92.666	0.826	225.053	17470	1.314	0.761	0.911	0.763986
139	CEP19_KAN631-11_3.tif:0013-0845	0.773	60.967	0	165	130.029	95.925	0.914	47.123	3658	1.375	0.727	0.923	0.159969
140	CEP19_KAN631-11_3.tif:0014-0881	1.572	227.123	0	1652	134.078	100.061	0.924	356.954	27709	1.094	0.914	0.968	1.21175
141	CEP19_KAN631-11_3.tif:0015-0943	1.726	188.373	0	1263	47.486	107.066	0.855	325.174	25242	1.366	0.732	0.905	1.10387
142	CEP19_KAN631-11_3.tif:0016-0983	1.623	100.31	0	508	88.262	111.588	0.813	162.819	12639	1.514	0.66	0.906	0.55272
143	CEP19_KAN631-11_3.tif:0017-1008	1.752	128.912	0	834	24.539	114.465	0.877	225.852	17532	1.756	0.569	0.978	0.766697
144	CEP19_KAN631-11_3.tif:0018-1048	1.43	161.631	0	798	141.484	118.943	0.866	231.12	17941	1.413	0.708	0.933	0.784584
145	CEP19_KAN631-11_3.tif:0019-1056	1.572	136.172	0	843	7.678	119.908	0.685	214.013	16613	1.936	0.517	0.865	0.726508
146	CEP19_KAN631-11_3.tif:0020-1127	0.966	153.027	0	358	140.225	127.89	0.756	147.85	11477	1.879	0.532	0.877	0.501904
147	CEP19_KAN631-11_3.tif:0021-1134	0.644	56.1	0	386	116.905	128.754	0.981	36.135	2805	1.237	0.808	0.952	0.122666
148	CEP19_KAN631-11_3.tif:0022-1178	1.546	164.625	0	1045	58.111	133.756	0.873	254.489	19755	1.113	0.899	0.934	0.863912
149	CEP19_KAN631-11_4.tif:0001-0010	2.087	182.012	0	1645	101.047	1.1	0.841	379.846	29486	1.405	0.712	0.898	1.28946
150	CEP19_KAN631-11_4.tif:0002-0015	1.172	243.11	0	1040	113.834	1.704	0.917	284.994	22123	1.226	0.816	0.963	0.967468
151	CEP19_KAN631-11_4.tif:0003-0027	1.34	325.885	0	1896	86.11	3.068	0.91	436.605	33892	1.096	0.913	0.972	1.48214
152	CEP19_KAN631-11_4.tif:0004-0034	0.721	233.429	0	1076	112.025	3.916	0.92	168.397	13072	1.143	0.875	1	0.571656
153	CEP19_KAN631-11_4.tif:0005-0093	0.721	190.375	0	618	107.031	10.612	0.92	137.338	10661	1.143	0.875	1	0.46622
154	CEP19_KAN631-11_4.tif:0006-0112	1.43	213.658	0	1211	136.348	12.711	0.902	305.515	23716	1.204	0.831	0.965	1.03713
155	CEP19_KAN631-11_4.tif:0007-0283	0.889	160.464	0	658	127.749	32.115	0.933	142.632	11072	1.172	0.853	0.979	0.484193
156	CEP19_KAN631-11_4.tif:0008-0296	0.902	205.543	0	1043	127.177	33.607	0.947	185.35	14388	1.125	0.889	0.986	0.629206
157	CEP19_KAN631-11_4.tif:0009-0325	1.366	234.981	0	1384	115.856	36.941	0.916	320.871	24908	1.112	0.899	0.942	1.08926
158	CEP19_KAN631-11_4.tif:0010-0371	0.979	58.158	0	288	56.711	42.179	0.939	56.94	4420	1.024	0.976	0.968	0.193292
159	CEP19_KAN631-11_4.tif:0011-0388	1.997	164.252	0	965	88.595	44.074	0.832	327.969	25459	1.513	0.661	0.909	1.11336
160	CEP19_KAN631-11_4.tif:0012-0460	1.804	164.707	0	1219	17.416	52.173	0.826	297.052	23059	1.701	0.588	0.94	1.0084
161	CEP19_KAN631-11_4.tif:0013-0541	1.842	164.979	0	785	126.445	61.421	0.866	303.918	23592	1.263	0.792	0.923	1.03171
162	CEP19_KAN631-11_4.tif:0014-0632	1.919	207.698	0	1034	119.37	71.717	0.916	398.667	30947	1.186	0.843	0.931	1.35335
163	CEP19_KAN631-11_4.tif:0015-0654	1.726	169.104	0	1187	22.867	74.248	0.888	291.912	22660	1.159	0.863	0.931	0.990952
164	CEP19_KAN631-11_4.tif:0016-0757	1.34	196.74	0	466	140.838	85.934	0.871	263.584	20461	1.442	0.694	0.95	0.894786
165	CEP19_KAN631-11_4.tif:0017-0819	1.829	150.38	0	613	136.191	92.991	0.86	275.088	21354	1.477	0.677	0.937	0.933839
166	CEP19_KAN631-11_4.tif:0018-0941	1.25	207.763	0	859	47.164	106.798	0.904	259.616	20153	1.227	0.815	0.946	0.881317
167	CEP19_KAN631-11_4.tif:0019-0943	2.035	185.152	0	1231	84.793	107.075	0.9	376.857	29254	1.128	0.886	0.94	1.27932
168	CEP19_KAN631-11_4.tif:0020-1098	1.237	162.531	0	671	80.379	124.63	0.906	201.002	15603	1.041	0.96	0.98	0.68234
169	CEP19_KAN631-11_4.tif:0021-1162	1.404	220.734	0	1335	17.566	131.915	0.826	309.947	24060	1.237	0.809	0.908	1.05218
170	CEP19_KAN631-11_4.tif:0022-1228	1.069	136.807	0	449	129.4	139.377	0.836	146.278	11355	1.426	0.701	0.907	0.496569
171	CEP19_KAN631-11_4.tif:0023-1237	0.992	200.195	0	673	90.96	140.467	0.951	198.58	15415	1.123	0.89	0.981	0.674118
										22021.9				0.963046
														0
														0
LRRC45 KO														0
172	CEP19_KAN631-12_1.tif:0001-0113	2.048	142.239	0	1242	70.437	12.862	0.875	291.345	22616	1.307	0.765	0.914	0.989027
173	CEP19_KAN631-12_1.tif:0002-0185	2.113	184.689	0	1414	19.509	21.075	0.902	390.191	30289	1.346	0.743	0.937	1.32458
174	CEP19_KAN631-12_1.tif:0003-0187	1.585	164.764	0	1166	122.404	21.278	0.921	261.072	20266	1.253	0.798	0.943	0.886259
175	CEP19_KAN631-12_1.tif:0004-0278	0.683	75.132	5	190	31.661	31.616	0.993	51.297	3982	1.208	0.828	0.972	0.174138
176	CEP19_KAN631-12_1.tif:0005-0324	1.533	255.639	0	1848	131.038	36.779	0.928	391.891	30421	1.051	0.951	0.956	1.33035
177	CEP19_KAN631-12_1.tif:0006-0403	1.314	224.333	0	745	2.75	45.748	0.95	294.772	22882	1.084	0.923	0.971	1.00066
178	CEP19_KAN631-12_1.tif:0007-0406	1.533	239.975	0	1572	95.951	46.118	0.902	367.878	28557	1.108	0.902	0.96	1.24884
179	CEP19_KAN631-12_1.tif:0008-0595	1.366	235.509	0	1279	46.422	67.589	0.899	321.593	24964	1.337	0.748	0.991	1.09171
180	CEP19_KAN631-12_1.tif:0009-0662	2.023	179.42	0	729	71.048	75.2	0.885	362.88	28169	1.397	0.716	0.946	1.23187
181	CEP19_KAN631-12_1.tif:0010-0722	0.812	184.794	0	917	124.73	81.953	0.937	149.975	11642	1.039	0.963	0.992	0.50912
182	CEP19_KAN631-12_1.tif:0011-0790	1.919	223.195	0	1706	101.179	89.677	0.889	428.412	33256	1.103	0.906	0.977	1.45433
183	CEP19_KAN631-12_1.tif:0012-0793	1.932	143.813	0	637	117.223	89.978	0.732	277.896	21572	1.819	0.55	0.898	0.943372
184	CEP19_KAN631-12_1.tif:0013-0811	1.327	203.291	0	1137	22.144	92.063	0.863	269.741	20939	1.324	0.755	0.936	0.91569
185	CEP19_KAN631-12_1.tif:0014-0816	0.889	185.377	0	728	112.417	92.622	0.97	164.777	12791	1.172	0.853	0.979	0.559367
186	CEP19_KAN631-12_1.tif:0015-0829	1.262	190.429	0	493	52.84	94.07	0.943	240.409	18662	1.378	0.726	0.97	0.816114
187	CEP19_KAN631-12_1.tif:0016-0938	0.721	125.679	0	359	27.114	106.443	0.867	90.665	7038	1.703	0.587	0.966	0.307781
188	CEP19_KAN631-12_1.tif:0017-0961	0.812	165.619	0	485	82.407	109.08	0.937	134.413	10434	1.039	0.963	0.992	0.456293
189	CEP19_KAN631-12_1.tif:0018-1001	1.919	167.101	0	1002	95.652	113.676	0.95	320.742	24898	1.14	0.877	0.961	1.08882
190	CEP19_KAN631-12_1.tif:0019-1021	1.366	89.623	0	258	46.822	115.919	0.916	122.381	9500	1.105	0.905	0.942	0.415448
191	CEP19_KAN631-12_1.tif:0020-1152	1.25	215.309	0	1101	20.875	130.81	0.933	269.046	20885	1.108	0.902	0.946	0.913329
192	CEP19_KAN631-12_1.tif:0021-1207	1.778	207.341	0	1341	134.066	136.948	0.89	368.6	28613	1.326	0.754	0.955	1.25128
193	CEP19_KAN631-12_1.tif:0022-1218	1.275	170.384	0	976	74.828	138.226	0.952	217.298	16868	1.119	0.894	0.961	0.73766
194	CEP19_KAN631-12_1.tif:0023-1267	1.018	213.215	0	841	19.919	143.85	0.941	216.989	16844	1.001	0.999	0.988	0.73661
195	CEP19_KAN631-12_2.tif:0001-0053	1.018	216.367	0	551	26.099	6.01	0.908	220.196	17093	1.252	0.799	0.994	0.747499
196	CEP19_KAN631-12_2.tif:0002-0062	2.113	181.524	0	1576	33.043	7.103	0.851	383.505	29770	1.533	0.652	0.911	1.30188
197	CEP19_KAN631-12_2.tif:0003-0063	1.623	257.786	0	1806	15.152	7.131	0.858	418.428	32481	1.255	0.797	0.897	1.42044
198	CEP19_KAN631-12_2.tif:0004-0094	1.366	244.236	0	1666	113.99	10.685	0.899	333.509	25889	1.123	0.89	0.986	1.13216
199	CEP19_KAN631-12_2.tif:0005-0103	1.958	172.467	0	1616	51.595	11.683	0.911	337.708	26215	1.407	0.711	0.944	1.14642
200	CEP19_KAN631-12_2.tif:0006-0156	2.126	149.242	0	1349	81.372	17.747	0.836	317.225	24625	1.509	0.663	0.904	1.07688
201	CEP19_KAN631-12_2.tif:0007-0187	0.67	53.962	0	181	142.034	21.225	1	36.148	2806	1.153	0.867	0.963	0.12271
202	CEP19_KAN631-12_2.tif:0008-0337	1.43	325.856	0	1963	48.881	38.327	0.93	465.951	36170	1.043	0.959	0.961	1.58176
203	CEP19_KAN631-12_2.tif:0009-0386	1.469	269.868	0	1928	14.073	43.8	0.927	396.322	30765	1.221	0.819	0.979	1.34539
204	CEP19_KAN631-12_2.tif:0010-0390	1.958	204.27	0	1816	126.64	44.359	0.875	399.981	31049	1.406	0.711	0.968	1.35781
205	CEP19_KAN631-12_2.tif:0011-0405	1.597	157.032	0	748	89.954	46.027	0.877	250.843	19472	1.352	0.74	0.939	0.851536
206	CEP19_KAN631-12_2.tif:0012-0545	1.855	154.688	0	1108	23.92	61.884	0.863	286.952	22275	1.362	0.734	0.906	0.974115
207	CEP19_KAN631-12_2.tif:0013-0583	2.19	199.329	0	1808	82.253	66.188	0.882	436.528	33886	1.291	0.775	0.921	1.48188
208	CEP19_KAN631-12_2.tif:0014-0610	1.971	244.242	0	1541	143.996	69.248	0.917	481.397	37369	1.206	0.829	0.942	1.6342
209	CEP19_KAN631-12_2.tif:0015-0766	1.752	196.507	0	1502	89.309	86.898	0.891	344.278	26725	1.393	0.718	0.922	1.16872
210	CEP19_KAN631-12_2.tif:0016-0815	1.43	276.099	0	1861	37.934	92.493	0.959	394.802	30647	1.249	0.801	0.974	1.34023
211	CEP19_KAN631-12_2.tif:0017-0916	1.443	149.634	0	746	12.065	103.972	0.911	215.894	16759	1.224	0.817	0.974	0.732893
212	CEP19_KAN631-12_2.tif:0018-0932	1.469	226.43	0	1270	34.107	105.824	0.9	332.53	25813	1.092	0.915	0.97	1.12884
213	CEP19_KAN631-12_2.tif:0019-1002	1.52	179.144	0	1290	132.405	113.727	0.92	272.318	21139	1.258	0.795	0.963	0.924436
214	CEP19_KAN631-12_2.tif:0020-1122	1.61	142.24	0	986	8.226	127.327	0.899	229.046	17780	1.281	0.781	0.916	0.777543
215	CEP19_KAN631-12_2.tif:0021-1135	1.804	135.907	0	841	49.05	128.87	0.879	245.111	19027	1.32	0.758	0.956	0.832076
216	CEP19_KAN631-12_2.tif:0022-1187	0.721	186.286	0	569	63.333	134.781	0.92	134.388	10432	1.143	0.875	1	0.456205
217	CEP19_KAN631-12_2.tif:0023-1202	1.211	211.319	0	1006	81.834	136.419	0.947	255.893	19864	1.011	0.989	0.969	0.868679
218	CEP19_KAN631-12_2.tif:0024-1260	1.25	67.351	0	258	114.33	143.053	0.964	84.16	6533	1.093	0.915	0.956	0.285697
219	CEP19_KAN631-12_3.tif:0001-0113	1.804	197.621	0	1287	100.034	12.906	0.893	356.413	27667	1.345	0.744	0.946	1.20991
220	CEP19_KAN631-12_3.tif:0002-0189	1.61	212.056	0	1087	22.939	21.447	0.963	341.47	26507	1.048	0.955	0.951	1.15919
221	CEP19_KAN631-12_3.tif:0003-0194	1.378	285.729	0	1620	119.241	22.103	0.953	393.849	30573	1.117	0.895	0.951	1.337
222	CEP19_KAN631-12_3.tif:0004-0218	1.829	250.352	0	1817	56.843	24.825	0.869	457.964	35550	1.525	0.656	0.976	1.55465
223	CEP19_KAN631-12_3.tif:0005-0387	0.799	172.274	0	723	71.505	43.925	0.96	137.595	10681	1.081	0.925	0.984	0.467094
224	CEP19_KAN631-12_3.tif:0006-0407	2.267	183.767	0	1341	129.302	46.18	0.863	416.651	32343	1.41	0.709	0.919	1.4144
225	CEP19_KAN631-12_3.tif:0007-0409	0.709	82.782	9	154	48.402	46.429	0.943	58.653	4553	1.15	0.87	0.991	0.199109
226	CEP19_KAN631-12_3.tif:0008-0441	1.662	225.008	0	1303	33.224	50.027	0.832	373.92	29026	1.546	0.647	0.949	1.26935
227	CEP19_KAN631-12_3.tif:0009-0502	0.915	208.549	0	503	0.675	57.027	0.924	190.748	14807	1.13	0.885	0.993	0.64753
228	CEP19_KAN631-12_3.tif:0010-0538	1.675	167.731	0	877	59.175	61.108	0.92	280.898	21805	1.256	0.796	0.956	0.953561
229	CEP19_KAN631-12_3.tif:0011-0652	0.786	123.852	2	329	85.813	73.997	0.945	97.325	7555	1.116	0.896	0.976	0.33039
230	CEP19_KAN631-12_3.tif:0012-0714	1.52	188.949	0	1011	57.371	81.055	0.948	287.223	22296	1.341	0.746	0.959	0.975033
231	CEP19_KAN631-12_3.tif:0013-0819	1.726	263.09	0	767	125.492	92.993	0.898	454.151	35254	1.253	0.798	0.978	1.5417
232	CEP19_KAN631-12_3.tif:0014-0826	1.585	182.74	0	1196	107.569	93.813	0.87	289.554	22477	1.32	0.757	0.928	0.982949
233	CEP19_KAN631-12_3.tif:0015-0843	0.889	75.957	0	188	36.821	95.719	0.954	67.516	5241	1.304	0.767	0.939	0.229196
234	CEP19_KAN631-12_3.tif:0016-1004	1.288	107.88	0	444	140.236	113.991	0.919	138.974	10788	1.17	0.854	0.917	0.471773
235	CEP19_KAN631-12_3.tif:0017-1005	1.301	240.624	0	1055	106.004	114.128	0.972	313.077	24303	1.155	0.866	0.967	1.0628
236	CEP19_KAN631-12_3.tif:0018-1027	1.816	175.028	0	1273	115.789	116.539	0.876	317.921	24679	1.349	0.741	0.934	1.07925
237	CEP19_KAN631-12_3.tif:0019-1062	1.224	169.621	0	989	51.556	120.534	0.944	207.585	16114	1.188	0.842	0.936	0.704686
238	CEP19_KAN631-12_3.tif:0020-1145	1.301	186.832	0	685	90.19	130.015	0.912	243.088	18870	1.129	0.886	0.962	0.82521
239	CEP19_KAN631-12_3.tif:0021-1187	1.224	110.095	0	420	68.921	134.812	0.914	134.735	10459	1.225	0.816	0.936	0.457386
240	CEP19_KAN631-12_4.tif:0001-0025	1.52	198.593	0	862	106.076	2.85	0.948	301.883	23434	1.136	0.88	0.955	1.0248
241	CEP19_KAN631-12_4.tif:0002-0049	1.649	162.344	0	1385	60.564	5.621	0.931	267.693	20780	1.191	0.839	0.955	0.908737
242	CEP19_KAN631-12_4.tif:0003-0065	1.907	201.588	0	917	30.051	7.349	0.944	384.342	29835	1.231	0.813	0.955	1.30472
243	CEP19_KAN631-12_4.tif:0004-0158	0.721	190.857	27	399	60.212	17.933	0.92	137.686	10688	1.143	0.875	1	0.4674
244	CEP19_KAN631-12_4.tif:0005-0186	1.636	164.488	0	672	73.934	21.187	0.819	269.11	20890	1.438	0.695	0.904	0.913547
245	CEP19_KAN631-12_4.tif:0006-0238	1.945	127.113	0	510	28.501	27.04	0.799	247.262	19194	1.568	0.638	0.932	0.839379
246	CEP19_KAN631-12_4.tif:0007-0328	1.366	229.047	0	668	30.125	37.237	0.927	312.768	24279	1.137	0.879	0.986	1.06175
247	CEP19_KAN631-12_4.tif:0008-0345	1.726	161.09	0	872	124.552	39.237	0.902	278.076	21586	1.519	0.658	0.937	0.943984
248	CEP19_KAN631-12_4.tif:0009-0398	1.726	118.179	0	951	19.701	45.176	0.937	204.003	15836	1.122	0.891	0.947	0.692529
249	CEP19_KAN631-12_4.tif:0010-0469	2.216	152.738	0	1113	42.353	53.295	0.832	338.43	26271	1.404	0.712	0.92	1.14887
250	CEP19_KAN631-12_4.tif:0011-0541	1.997	251.755	0	2073	83.058	61.418	0.861	502.691	39022	1.364	0.733	0.934	1.70648
251	CEP19_KAN631-12_4.tif:0012-0552	2.023	163.771	0	1269	137.124	62.602	0.843	331.228	25712	1.456	0.687	0.918	1.12442
252	CEP19_KAN631-12_4.tif:0013-0590	1.945	186.841	0	1109	24.242	66.988	0.891	363.447	28213	1.392	0.718	0.965	1.23379
253	CEP19_KAN631-12_4.tif:0014-0627	1.984	190.039	0	1266	143.118	71.198	0.899	377.012	29266	1.254	0.797	0.931	1.27984
254	CEP19_KAN631-12_4.tif:0015-0637	1.391	183.926	0	683	97.902	72.36	0.962	255.893	19864	1.06	0.943	0.952	0.868679
255	CEP19_KAN631-12_4.tif:0016-0657	1.739	159.919	0	1025	108.828	74.68	0.919	278.115	21589	1.337	0.748	0.957	0.944115
256	CEP19_KAN631-12_4.tif:0017-0677	1.688	388.672	0	1753	129.22	76.896	0.981	655.913	50916	1.175	0.851	0.97	2.22662
257	CEP19_KAN631-12_4.tif:0018-0784	1.868	122.738	0	632	39.221	89.057	0.901	229.265	17797	1.468	0.681	0.954	0.778286
258	CEP19_KAN631-12_4.tif:0019-0824	0.799	249.919	0	1233	29.737	93.524	0.96	199.61	15495	1.081	0.925	0.984	0.677617
259	CEP19_KAN631-12_4.tif:0020-0853	1.649	216.805	0	1290	129.688	96.858	0.931	357.495	27751	1.232	0.812	0.955	1.21359
260	CEP19_KAN631-12_4.tif:0021-0894	1.713	142.714	0	598	55.854	101.536	0.93	244.518	18981	1.181	0.847	0.937	0.830064
261	CEP19_KAN631-12_4.tif:0022-0895	1.327	189.515	0	876	75.361	101.644	0.93	251.462	19520	1.137	0.879	0.972	0.853635
262	CEP19_KAN631-12_4.tif:0023-0918	1.623	119.524	0	524	102.318	104.186	0.858	194.007	15060	1.447	0.691	0.91	0.658594
263	CEP19_KAN631-12_4.tif:0024-1086	1.713	126.06	0	711	8.777	123.281	0.881	215.984	16766	1.283	0.779	0.93	0.733199
264	CEP19_KAN631-12_4.tif:0025-1157	1.481	162.635	0	1030	106.401	131.343	0.837	240.937	18703	1.479	0.676	0.931	0.817907
										21931.9				0.959111
														0
														0
NCS1 KO														0
265	CEP19_KAN631-13_1.tif:0001-0086	1.275	165.152	0	689	72.501	9.775	0.894	210.625	16350	1.42	0.704	0.961	0.715007
266	CEP19_KAN631-13_1.tif:0002-0111	1.7	112.015	0	714	143.585	12.673	0.874	190.477	14786	1.321	0.757	0.93	0.646611
267	CEP19_KAN631-13_1.tif:0003-0144	2.19	200.312	0	1766	33.581	16.359	0.771	438.679	34053	1.662	0.602	0.872	1.48918
268	CEP19_KAN631-13_1.tif:0004-0200	1.494	360.517	0	1635	87.169	22.689	0.916	538.736	41820	1.198	0.835	0.983	1.82884
269	CEP19_KAN631-13_1.tif:0005-0228	2.1	176.595	0	1286	140.08	25.931	0.906	370.816	28785	1.462	0.684	0.973	1.25881
270	CEP19_KAN631-13_1.tif:0006-0238	1.726	170.187	0	1016	120.903	27.103	0.937	293.78	22805	1.173	0.853	0.954	0.997293
271	CEP19_KAN631-13_1.tif:0007-0390	1.185	196.304	0	1085	32.762	44.325	0.927	232.653	18060	1.217	0.822	0.968	0.789788
272	CEP19_KAN631-13_1.tif:0008-0518	1.546	240.533	0	1655	124.307	58.825	0.952	371.833	28864	1.168	0.856	0.938	1.26226
273	CEP19_KAN631-13_1.tif:0009-0557	2.19	185.224	0	1148	101.705	63.197	0.85	405.636	31488	1.42	0.704	0.95	1.37701
274	CEP19_KAN631-13_1.tif:0010-0563	1.391	185.324	0	1026	50.629	63.988	0.905	257.838	20015	1.197	0.836	0.956	0.875282
275	CEP19_KAN631-13_1.tif:0011-0675	1.868	92.028	0	529	137.48	76.637	0.856	171.901	13344	1.517	0.659	0.954	0.583551
276	CEP19_KAN631-13_1.tif:0012-0698	1.765	99.058	0	522	41.336	79.352	0.874	174.825	13571	1.534	0.652	0.935	0.593478
277	CEP19_KAN631-13_1.tif:0013-0726	2.087	229.302	0	1678	135.661	82.411	0.849	478.537	37147	1.436	0.696	0.926	1.62449
278	CEP19_KAN631-13_1.tif:0014-0796	1.907	100.892	0	541	80.851	90.32	0.864	192.358	14932	1.456	0.687	0.925	0.652996
279	CEP19_KAN631-13_1.tif:0015-0914	1.688	194.534	0	1300	59.096	103.805	0.845	328.291	25484	1.351	0.74	0.939	1.11445
280	CEP19_KAN631-13_1.tif:0016-0924	2.1	176.282	0	1060	78.559	104.879	0.854	370.159	28734	1.534	0.652	0.945	1.25658
281	CEP19_KAN631-13_1.tif:0017-1080	0.992	84.468	0	185	61.687	122.647	0.951	83.786	6504	1.06	0.944	0.975	0.284428
282	CEP19_KAN631-13_1.tif:0018-1119	1.597	133.468	0	788	6.02	126.991	0.831	213.201	16550	1.555	0.643	0.943	0.723753
283	CEP19_KAN631-13_1.tif:0019-1179	1.984	138.877	0	959	88.833	133.858	0.868	275.513	21387	1.232	0.812	0.906	0.935282
284	CEP19_KAN631-13_1.tif:0020-1230	0.734	89.474	0	204	55.951	139.622	1	65.699	5100	1.037	0.965	0.95	0.22303
285	CEP19_KAN631-13_2.tif:0001-0028	2.254	178.451	0	1354	80.225	3.261	0.846	402.3	31229	1.372	0.729	0.923	1.36569
286	CEP19_KAN631-13_2.tif:0002-0095	1.816	152.014	0	930	8.777	10.84	0.824	276.118	21434	1.504	0.665	0.898	0.937337
287	CEP19_KAN631-13_2.tif:0003-0197	0.799	182.581	0	505	60.496	22.36	0.96	145.827	11320	1.081	0.925	0.984	0.495039
288	CEP19_KAN631-13_2.tif:0004-0276	1.932	175.867	0	1382	1.149	31.318	0.825	339.834	26380	1.617	0.618	0.904	1.15363
289	CEP19_KAN631-13_2.tif:0005-0313	2.087	153.031	0	1256	54.093	35.512	0.841	319.364	24791	1.532	0.653	0.913	1.08414
290	CEP19_KAN631-13_2.tif:0006-0386	2.499	142.376	0	1236	138.317	43.857	0.842	355.821	27621	1.693	0.591	0.935	1.2079
291	CEP19_KAN631-13_2.tif:0007-0494	2.01	202.667	0	947	92.012	56.144	0.867	407.285	31616	1.11	0.901	0.931	1.38261
292	CEP19_KAN631-13_2.tif:0008-0630	2.048	114.73	0	996	135.483	71.597	0.841	234.998	18242	1.485	0.673	0.958	0.797747
293	CEP19_KAN631-13_2.tif:0009-0664	1.958	124.375	0	921	40.767	75.456	0.735	243.539	18905	1.666	0.6	0.856	0.826741
294	CEP19_KAN631-13_2.tif:0010-0696	1.919	171.356	0	1387	57.71	79.019	0.87	328.91	25532	1.511	0.662	0.937	1.11655
295	CEP19_KAN631-13_2.tif:0011-0794	2.937	115.083	0	1168	121.027	90.156	0.75	338.017	26239	2.318	0.431	0.958	1.14747
296	CEP19_KAN631-13_2.tif:0012-0803	1.971	110.085	0	583	8.415	91.075	0.783	216.976	16843	1.492	0.67	0.895	0.736567
297	CEP19_KAN631-13_2.tif:0013-0901	1.469	32.088	0	141	84.586	102.324	0.943	47.123	3658	1.299	0.77	0.954	0.159969
298	CEP19_KAN631-13_2.tif:0014-0981	2.177	135.58	0	1121	38.652	111.34	0.814	295.171	22913	1.699	0.588	0.997	1.00202
299	CEP19_KAN631-13_2.tif:0015-1004	1.172	90.297	0	489	18.126	113.947	0.917	105.853	8217	1.05	0.953	0.958	0.35934
300	CEP19_KAN631-13_2.tif:0016-1072	1.868	146.448	0	732	68.345	121.722	0.891	273.555	21235	1.334	0.75	0.915	0.928635
301	CEP19_KAN631-13_2.tif:0017-1154	1.494	113.336	0	603	5.8	130.951	0.702	169.363	13147	1.896	0.527	0.838	0.574936
302	CEP19_KAN631-13_2.tif:0018-1177	0.799	57.226	0	243	124.283	133.59	0.96	45.706	3548	1.081	0.925	0.984	0.155159
303	CEP19_KAN631-13_3.tif:0001-0096	1.134	278.58	0	1181	31.156	10.884	0.93	315.808	24515	1.11	0.901	0.989	1.07207
304	CEP19_KAN631-13_3.tif:0002-0157	1.25	82.423	0	194	38.594	17.877	0.964	102.994	7995	1.124	0.889	0.951	0.349632
305	CEP19_KAN631-13_3.tif:0003-0204	1.804	293.143	0	2211	55.815	23.157	0.927	528.688	41040	1.11	0.901	0.956	1.79473
306	CEP19_KAN631-13_3.tif:0004-0214	1.456	192.876	0	889	81.942	24.296	0.908	280.769	21795	1.328	0.753	0.946	0.953124
307	CEP19_KAN631-13_3.tif:0005-0397	2.293	217.725	0	1536	105.216	45.099	0.924	499.252	38755	1.273	0.786	0.944	1.69481
308	CEP19_KAN631-13_3.tif:0006-0502	1.739	231.43	0	1529	78.862	57.016	0.894	402.48	31243	1.277	0.783	0.947	1.3663
309	CEP19_KAN631-13_3.tif:0007-0585	1.52	254.712	0	1269	126.921	66.476	0.976	387.189	30056	1.078	0.928	0.963	1.31439
310	CEP19_KAN631-13_3.tif:0008-0604	1.546	211.642	0	945	47.135	68.552	0.964	327.171	25397	1.146	0.873	0.972	1.11064
311	CEP19_KAN631-13_3.tif:0009-0701	1.585	318.496	0	1954	101.63	79.596	0.906	504.662	39175	1.071	0.933	0.969	1.71317
312	CEP19_KAN631-13_3.tif:0010-0799	0.863	73.687	0	210	139.553	90.665	0.906	63.6	4937	1.431	0.699	0.978	0.215902
313	CEP19_KAN631-13_3.tif:0011-0808	1.778	189.065	0	1115	61.329	91.784	0.914	336.111	26091	1.203	0.831	0.955	1.14099
314	CEP19_KAN631-13_3.tif:0012-0879	1.056	30.732	0	187	88.166	99.812	0.962	32.463	2520	1.127	0.887	0.965	0.110203
315	CEP19_KAN631-13_3.tif:0013-0973	1.314	237.5	0	1210	31.694	110.501	0.95	312.073	24225	1.111	0.9	0.971	1.05939
316	CEP19_KAN631-13_3.tif:0014-1051	1.391	337	0	1860	111.503	119.289	0.916	468.862	36396	1.099	0.91	0.991	1.59164
317	CEP19_KAN631-13_3.tif:0015-1143	1.739	153.874	0	1026	63.912	129.779	0.871	267.603	20773	1.468	0.681	0.951	0.908431
318	CEP19_KAN631-13_3.tif:0016-1192	1.739	170.385	0	1241	76.673	135.345	0.884	296.318	23002	1.486	0.673	0.922	1.00591
319	CEP19_KAN631-13_3.tif:0017-1259	1.791	146.496	0	626	1.507	142.905	0.946	262.321	20363	1.171	0.854	0.955	0.890501
320	CEP19_KAN631-13_4.tif:0001-0082	2.667	146.13	0	1095	56.777	9.38	0.828	389.675	30249	1.595	0.627	0.912	1.32283
321	CEP19_KAN631-13_4.tif:0002-0092	2.345	138.72	0	1303	136.258	10.427	0.826	325.238	25247	1.609	0.622	0.899	1.10408
322	CEP19_KAN631-13_4.tif:0003-0152	1.855	161.556	0	1214	17.258	17.324	0.872	299.693	23264	1.445	0.692	0.941	1.01737
323	CEP19_KAN631-13_4.tif:0004-0256	0.876	35.75	0	131	27.19	29.116	0.978	31.317	2431	1.271	0.787	0.938	0.106311
324	CEP19_KAN631-13_4.tif:0005-0266	2.473	105.688	0	766	106.228	30.199	0.816	261.407	20292	1.582	0.632	0.921	0.887396
325	CEP19_KAN631-13_4.tif:0006-0439	2.461	197.995	0	1630	71.679	49.922	0.819	487.168	37817	1.793	0.558	0.96	1.65379
326	CEP19_KAN631-13_4.tif:0007-0460	1.301	50.99	0	254	106.182	52.284	0.959	66.344	5150	1.453	0.688	0.944	0.225216
327	CEP19_KAN631-13_4.tif:0008-0583	2.242	88.253	0	806	31.102	66.112	0.823	197.82	15356	1.561	0.641	0.933	0.671538
328	CEP19_KAN631-13_4.tif:0009-0680	2.473	171.99	0	1542	92.748	77.18	0.823	425.398	33022	1.635	0.611	0.946	1.4441
329	CEP19_KAN631-13_4.tif:0010-0719	2.319	164.506	0	1270	140.632	81.652	0.806	381.456	29611	1.741	0.574	0.93	1.29493
330	CEP19_KAN631-13_4.tif:0011-0740	1.623	134.484	0	1122	39.047	83.997	0.917	218.29	16945	1.016	0.984	0.944	0.741027
331	CEP19_KAN631-13_4.tif:0012-0746	1.597	167.984	0	1059	10.348	84.715	0.939	268.337	20830	1.095	0.913	0.973	0.910923
332	CEP19_KAN631-13_4.tif:0013-0847	2.035	186.722	0	1515	47.212	96.203	0.828	380.052	29502	1.235	0.81	0.913	1.29016
333	CEP19_KAN631-13_4.tif:0014-0889	1.958	115.421	0	892	120.365	100.92	0.796	226.006	17544	1.412	0.708	0.899	0.767222
334	CEP19_KAN631-13_4.tif:0015-1081	1.842	230.622	0	1391	101.269	122.704	0.912	424.844	32979	1.217	0.821	0.938	1.44222
335	CEP19_KAN631-13_4.tif:0016-1092	2.332	127.315	0	1078	78.794	124.004	0.786	296.859	23044	1.874	0.534	0.928	1.00774
336	CEP19_KAN631-13_4.tif:0017-1274	1.185	140.533	0	807	20.782	144.69	0.748	166.555	12929	2.156	0.464	0.948	0.565402
337	CEP19_KAN631-13_5.tif:0001-0072	1.919	160.309	0	1347	9.72	8.214	0.849	307.705	23886	1.722	0.581	0.943	1.04457
338	CEP19_KAN631-13_5.tif:0002-0129	2.486	186.036	0	1701	69.974	14.641	0.838	462.537	35905	1.396	0.716	0.906	1.57017
339	CEP19_KAN631-13_5.tif:0003-0138	1.842	124.566	0	968	81.689	15.697	0.844	229.472	17813	1.702	0.588	0.953	0.778986
340	CEP19_KAN631-13_5.tif:0004-0216	2.19	206.312	0	1640	38.723	24.515	0.85	451.819	35073	1.455	0.687	0.944	1.53379
341	CEP19_KAN631-13_5.tif:0005-0271	1.43	248.991	0	1311	132.679	30.753	0.959	356.04	27638	1.213	0.825	0.969	1.20865
342	CEP19_KAN631-13_5.tif:0006-0466	1.868	143.359	0	805	103.941	52.824	0.878	267.783	20787	1.232	0.811	0.935	0.909043
343	CEP19_KAN631-13_5.tif:0007-0495	2.035	128.203	0	788	39.334	56.173	0.782	260.943	20256	1.331	0.752	0.868	0.885822
344	CEP19_KAN631-13_5.tif:0008-0536	1.855	156.833	0	1173	74.988	60.905	0.943	290.933	22584	1.242	0.805	0.95	0.987628
345	CEP19_KAN631-13_5.tif:0009-0584	1.649	144.781	0	952	34.581	66.339	0.775	238.734	18532	1.783	0.561	0.886	0.810429
346	CEP19_KAN631-13_5.tif:0010-0852	1.739	183.244	0	1178	130.309	96.722	0.861	318.681	24738	1.475	0.678	0.918	1.08183
347	CEP19_KAN631-13_5.tif:0011-0852	1.095	181.953	0	449	1.758	96.695	0.898	199.237	15466	1.165	0.858	0.971	0.676349
348	CEP19_KAN631-13_5.tif:0012-0872	1.172	195.451	0	1094	15.402	99.052	0.917	229.124	17786	1.198	0.834	0.963	0.777805
349	CEP19_KAN631-13_5.tif:0013-0968	2.293	176.685	0	1580	81.782	109.926	0.83	405.147	31450	1.516	0.659	0.978	1.37535
350	CEP19_KAN631-13_5.tif:0014-1170	1.481	118.878	0	619	29.015	132.891	0.924	176.113	13671	1.333	0.75	0.958	0.597851
351	CEP19_KAN631-13_5.tif:0015-1233	0.889	11.435	0	85	144.481	140.022	0.97	10.164	789	1.115	0.897	0.979	0.034504
352	CEP19_KAN631-13_5.tif:0016-1252	1.778	128.891	0	889	125.75	142.244	0.827	229.137	17787	1.44	0.694	0.902	0.777849
										21946.6				0.959753
														0
														0
C3ORF14 KO														0
353	CEP19_KAN631-14_1.tif:0001-0059	0.915	221.07	0	987	62.192	6.76	0.924	202.2	15696	1.13	0.885	0.993	0.686407
354	CEP19_KAN631-14_1.tif:0002-0097	1.443	265.348	0	1397	84.194	10.983	0.911	382.848	29719	1.239	0.807	0.97	1.29965
355	CEP19_KAN631-14_1.tif:0003-0097	1.314	192.667	0	1311	76.08	11.066	0.921	253.162	19652	1.319	0.758	0.981	0.859408
356	CEP19_KAN631-14_1.tif:0004-0171	1.185	225.478	0	1023	119.07	19.439	0.959	267.229	20744	1.018	0.982	0.968	0.907162
357	CEP19_KAN631-14_1.tif:0005-0325	1.713	191.398	0	1194	68.285	36.868	0.881	327.931	25456	1.269	0.788	0.937	1.11322
358	CEP19_KAN631-14_1.tif:0006-0480	1.404	147.358	0	783	140.247	54.559	0.913	206.915	16062	1.051	0.951	0.956	0.702412
359	CEP19_KAN631-14_1.tif:0007-0518	1.533	173.378	0	1063	54.769	58.798	0.891	265.787	20632	1.289	0.776	0.93	0.902265
360	CEP19_KAN631-14_1.tif:0008-0539	1.172	220.549	0	1019	29.237	61.251	0.948	258.547	20070	1.23	0.813	0.968	0.877688
361	CEP19_KAN631-14_1.tif:0009-0732	1.43	156.153	0	665	119.45	83.068	0.918	223.288	17333	1.181	0.847	0.921	0.757995
362	CEP19_KAN631-14_1.tif:0010-0774	1.636	211.323	0	1476	95.289	87.836	0.864	345.734	26838	1.413	0.708	0.93	1.17366
363	CEP19_KAN631-14_1.tif:0011-0804	1.237	298.885	0	1503	73.321	91.245	0.936	369.63	28693	1.049	0.953	0.98	1.25478
364	CEP19_KAN631-14_1.tif:0012-0836	0.902	183.771	0	528	137.891	94.943	0.947	165.717	12864	1.125	0.889	0.986	0.56256
365	CEP19_KAN631-14_1.tif:0013-0961	1.43	178.982	0	908	132.197	109.093	0.93	255.932	19867	1.261	0.793	0.965	0.86881
366	CEP19_KAN631-14_1.tif:0014-1049	1.623	135.929	0	727	141.417	119.078	0.917	220.634	17127	1.117	0.895	0.947	0.748986
367	CEP19_KAN631-14_1.tif:0015-1069	1.275	274.121	0	1536	69.287	121.372	0.952	349.599	27138	1.134	0.882	0.966	1.18678
368	CEP19_KAN631-14_1.tif:0016-1109	1.494	142.862	0	581	85.199	125.871	0.854	213.485	16572	1.428	0.7	0.947	0.724715
369	CEP19_KAN631-14_1.tif:0017-1127	1.881	126.61	0	653	132.198	127.998	0.931	238.128	18485	1.17	0.855	0.951	0.808373
370	CEP19_KAN631-14_1.tif:0018-1215	1.237	199.01	0	971	16.319	137.962	0.894	246.115	19105	1.181	0.847	0.937	0.835487
371	CEP19_KAN631-14_2.tif:0001-0033	1.585	90.797	0	650	121.296	3.875	0.815	143.869	11168	1.454	0.688	0.901	0.488391
372	CEP19_KAN631-14_2.tif:0002-0085	2.035	115.468	0	817	85.71	9.676	0.857	235.024	18244	1.505	0.665	0.952	0.797834
373	CEP19_KAN631-14_2.tif:0003-0096	0.992	225.156	0	482	89.608	10.953	0.854	223.34	17337	1.571	0.636	1	0.75817
374	CEP19_KAN631-14_2.tif:0004-0113	2.164	236.881	0	1374	41.684	12.809	0.868	512.662	39796	1.276	0.784	0.968	1.74033
375	CEP19_KAN631-14_2.tif:0005-0171	1.469	173.456	0	814	13.218	19.449	0.916	254.734	19774	1.407	0.711	0.95	0.864743
376	CEP19_KAN631-14_2.tif:0006-0244	0.94	49.329	0	131	103.66	27.788	0.901	46.389	3601	1.095	0.913	0.961	0.157476
377	CEP19_KAN631-14_2.tif:0007-0273	1.932	207.107	0	1656	132.088	31.095	0.922	400.2	31066	1.371	0.729	0.943	1.35856
378	CEP19_KAN631-14_2.tif:0008-0313	1.327	257.311	0	1491	27.538	35.538	0.96	341.418	26503	1.116	0.896	0.967	1.15901
379	CEP19_KAN631-14_2.tif:0009-0394	1.894	105.116	0	388	109.862	44.821	0.789	199.057	15452	1.74	0.575	0.894	0.675736
380	CEP19_KAN631-14_2.tif:0010-0511	1.031	166.838	0	1393	144.61	58.048	0.906	171.939	13347	1.447	0.691	0.958	0.583682
381	CEP19_KAN631-14_2.tif:0011-0578	1.043	186.654	0	668	35.155	65.633	0.886	194.767	15119	1.41	0.709	0.959	0.661174
382	CEP19_KAN631-14_2.tif:0012-0581	2.035	162.348	0	1076	118.384	65.915	0.913	330.443	25651	1.269	0.788	0.929	1.12175
383	CEP19_KAN631-14_2.tif:0013-0618	2.357	189.852	0	1758	89.099	70.167	0.778	447.568	34743	1.857	0.538	0.927	1.51936
384	CEP19_KAN631-14_2.tif:0014-0685	2.37	195.864	0	1831	72.237	77.72	0.835	464.263	36039	1.281	0.781	0.887	1.57603
385	CEP19_KAN631-14_2.tif:0015-0781	2.01	197.564	0	1517	48.884	88.713	0.817	397.031	30820	1.522	0.657	0.915	1.3478
386	CEP19_KAN631-14_2.tif:0016-0799	2.1	173.344	0	895	24.768	90.784	0.863	363.988	28255	1.491	0.671	0.976	1.23563
387	CEP19_KAN631-14_2.tif:0017-0866	0.812	234.381	15	749	3.689	98.348	0.9	190.219	14766	1.286	0.778	1	0.645737
388	CEP19_KAN631-14_2.tif:0018-0951	1.546	190.875	0	861	79.221	107.982	0.873	295.068	22905	1.317	0.759	0.941	1.00167
389	CEP19_KAN631-14_2.tif:0019-1073	1.829	112.662	0	675	131.787	121.893	0.797	206.09	15998	1.536	0.651	0.931	0.699614
390	CEP19_KAN631-14_2.tif:0020-1117	1.907	162.385	0	1202	28.652	126.845	0.874	309.599	24033	1.435	0.697	0.955	1.05099
391	CEP19_KAN631-14_2.tif:0021-1200	1.572	214.115	0	1243	42.696	136.194	0.913	336.51	26122	1.314	0.761	0.942	1.14235
392	CEP19_KAN631-14_2.tif:0022-1213	2.177	135.148	0	921	111.455	137.714	0.799	294.231	22840	1.616	0.619	0.921	0.998823
393	CEP19_KAN631-14_3.tif:0001-0060	1.778	147.319	0	667	82.237	6.83	0.929	261.896	20330	1.344	0.744	0.948	0.889058
394	CEP19_KAN631-14_3.tif:0002-0077	1.082	84.667	0	183	33.245	8.787	0.985	91.619	7112	1.121	0.892	0.971	0.311017
395	CEP19_KAN631-14_3.tif:0003-0102	1.829	195.211	0	1530	142.047	11.619	0.882	357.096	27720	1.315	0.76	0.937	1.21223
396	CEP19_KAN631-14_3.tif:0004-0136	1.52	173.805	0	1041	92.706	15.471	0.92	264.202	20509	1.299	0.77	0.963	0.896886
397	CEP19_KAN631-14_3.tif:0005-0165	1.314	75.422	0	370	131.669	18.775	0.95	99.103	7693	1.142	0.875	0.967	0.336425
398	CEP19_KAN631-14_3.tif:0006-0241	0.953	174.797	0	444	65.263	27.354	0.881	166.632	12935	1.356	0.738	0.961	0.565665
399	CEP19_KAN631-14_3.tif:0007-0251	1.623	235.468	0	1614	43.293	28.549	0.943	382.204	29669	1.196	0.836	0.951	1.29746
400	CEP19_KAN631-14_3.tif:0008-0266	1.958	245.053	0	1919	69.201	30.231	0.911	479.838	37248	1.287	0.777	0.935	1.6289
401	CEP19_KAN631-14_3.tif:0009-0284	1.198	124.419	0	362	31.489	32.302	0.907	149.061	11571	1.278	0.783	0.969	0.506015
402	CEP19_KAN631-14_3.tif:0010-0324	0.902	20.271	0	67	70.865	36.888	0.765	18.28	1419	1.897	0.527	0.909	0.0620547
403	CEP19_KAN631-14_3.tif:0011-0414	0.812	44	0	119	27.814	46.983	0.937	35.71	2772	1.039	0.963	0.992	0.121223
404	CEP19_KAN631-14_3.tif:0012-0421	1.7	178.947	0	899	101.717	47.799	0.949	304.292	23621	1.267	0.789	0.95	1.03298
405	CEP19_KAN631-14_3.tif:0013-0570	1.61	130.368	0	458	114.816	64.636	0.874	209.929	16296	1.431	0.699	0.923	0.712646
406	CEP19_KAN631-14_3.tif:0014-0573	1.507	177.12	0	1076	43.162	65.011	0.94	266.959	20723	1.277	0.783	0.967	0.906244
407	CEP19_KAN631-14_3.tif:0015-0582	0.876	136.735	0	1202	0.544	66.09	0.77	119.779	9298	2.015	0.496	0.944	0.406614
408	CEP19_KAN631-14_3.tif:0016-0606	1.739	251.274	0	1834	130.742	68.837	0.944	436.992	33922	1.308	0.764	0.951	1.48345
409	CEP19_KAN631-14_3.tif:0017-0628	1.868	215.855	0	1647	76.298	71.305	0.878	403.202	31299	1.313	0.762	0.932	1.36875
410	CEP19_KAN631-14_3.tif:0018-0710	1.43	259.748	0	901	144.344	80.607	0.902	371.421	28832	1.188	0.842	0.965	1.26086
411	CEP19_KAN631-14_3.tif:0019-0781	1.907	209.791	0	1745	93.363	88.709	0.864	399.981	31049	1.573	0.636	0.931	1.35781
412	CEP19_KAN631-14_3.tif:0020-0845	0.812	201.556	0	1062	97.263	95.914	0.937	163.579	12698	1.039	0.963	0.992	0.5553
413	CEP19_KAN631-14_3.tif:0021-0870	1.7	217.856	0	1534	129.013	98.758	0.949	370.455	28757	1.097	0.912	0.94	1.25758
414	CEP19_KAN631-14_3.tif:0022-0886	0.85	86.879	0	685	113.672	100.563	1	73.867	5734	1.136	0.88	0.957	0.250755
415	CEP19_KAN631-14_3.tif:0023-0987	1.572	144.885	0	993	57.019	112.06	0.913	227.707	17676	1.17	0.855	0.938	0.772995
416	CEP19_KAN631-14_3.tif:0024-1037	1.765	265.022	0	1768	102.87	117.709	0.958	467.729	36308	1.098	0.911	0.948	1.5878
417	CEP19_KAN631-14_3.tif:0025-1043	1.597	234.105	0	930	39.69	118.487	0.902	373.959	29029	1.151	0.869	0.939	1.26948
418	CEP19_KAN631-14_3.tif:0026-1078	1.301	208.743	0	1002	116.473	122.431	0.941	271.597	21083	1.15	0.869	0.957	0.921987
419	CEP19_KAN631-14_3.tif:0027-1169	1.546	215.917	0	1111	45.047	132.747	0.936	333.779	25910	1.114	0.898	0.956	1.13308
420	CEP19_KAN631-14_3.tif:0028-1235	1.443	124.67	0	673	141.975	140.137	0.792	179.875	13963	1.639	0.61	0.9	0.61062
421	CEP19_KAN631-14_4.tif:0001-0084	0.812	168.889	0	716	74.122	9.528	0.937	137.067	10640	1.039	0.963	0.992	0.465301
422	CEP19_KAN631-14_4.tif:0002-0103	1.34	291.125	0	1050	35.24	11.681	0.939	390.036	30277	1.148	0.871	0.972	1.32405
423	CEP19_KAN631-14_4.tif:0003-0103	0.812	213.381	0	758	31.332	11.684	0.937	173.176	13443	1.039	0.963	0.992	0.58788
424	CEP19_KAN631-14_4.tif:0004-0110	2.216	194.5	0	1521	16.345	12.443	0.905	430.963	33454	1.41	0.709	0.922	1.46299
425	CEP19_KAN631-14_4.tif:0005-0119	0.721	150.714	0	486	25.992	13.563	0.92	108.726	8440	1.143	0.875	1	0.369092
426	CEP19_KAN631-14_4.tif:0006-0127	1.752	184.772	0	833	60.132	14.487	0.926	323.718	25129	1.259	0.794	0.944	1.09892
427	CEP19_KAN631-14_4.tif:0007-0169	2.061	196.756	0	1461	120.639	19.158	0.925	405.546	31481	1.237	0.809	0.941	1.37671
428	CEP19_KAN631-14_4.tif:0008-0171	1.52	236.008	0	1270	41.487	19.411	0.92	358.758	27849	1.106	0.904	0.952	1.21787
429	CEP19_KAN631-14_4.tif:0009-0416	1.984	193.487	0	1829	59.755	47.232	0.89	383.852	29797	1.405	0.712	0.922	1.30306
430	CEP19_KAN631-14_4.tif:0010-0421	1.649	115.961	0	681	17.655	47.816	0.931	191.211	14843	1.246	0.803	0.955	0.649104
431	CEP19_KAN631-14_4.tif:0011-0556	1.082	200.06	0	1005	23.249	63.153	0.888	216.486	16805	1.398	0.715	0.977	0.734905
432	CEP19_KAN631-14_4.tif:0012-0591	1.237	169.115	0	779	42.923	67.069	0.936	209.143	16235	1.044	0.957	0.985	0.709978
433	CEP19_KAN631-14_4.tif:0013-0708	1.868	242.048	0	1688	8.309	80.419	0.878	452.128	35097	1.419	0.705	0.951	1.53484
434	CEP19_KAN631-14_4.tif:0014-0729	1.688	239.321	0	1626	42.543	82.803	0.892	403.871	31351	1.352	0.74	0.932	1.37102
435	CEP19_KAN631-14_4.tif:0015-0760	2.203	149.304	0	952	90.088	86.303	0.909	328.897	25531	1.396	0.717	0.942	1.1165
436	CEP19_KAN631-14_4.tif:0016-0790	1.881	133.849	0	669	144.337	89.712	0.931	251.745	19542	1.122	0.892	0.945	0.854597
437	CEP19_KAN631-14_4.tif:0017-0951	0.928	14.375	0	56	52.32	107.959	0.958	13.333	1035	1.269	0.788	0.954	0.0452619
438	CEP19_KAN631-14_4.tif:0018-1040	1.417	158.482	0	836	57.764	118.047	0.91	224.576	17433	1.209	0.827	0.936	0.762368
439	CEP19_KAN631-14_4.tif:0019-1082	1.185	143.185	0	526	81.236	122.827	0.959	169.698	13173	1.034	0.967	0.963	0.576073
440	CEP19_KAN631-14_4.tif:0020-1111	1.095	155.082	0	512	30.365	126.097	0.712	169.814	13182	1.674	0.597	0.829	0.576466
441	CEP19_KAN631-14_4.tif:0021-1174	1.597	168.798	0	932	115.846	133.259	0.877	269.638	20931	1.194	0.838	0.936	0.91534
442	CEP19_KAN631-14_4.tif:0022-1233	1.585	150.878	0	983	1.399	139.946	0.86	239.069	18558	1.425	0.702	0.901	0.811566
443	CEP19_KAN631-14_4.tif:0023-1241	1.172	110.407	0	495	12.252	140.882	0.875	129.428	10047	1.483	0.674	0.919	0.439369
										20825.1				0.910708
														0
														0
FOP KO														0
444	CEP19_KAN631-15_1.tif:0001-0066	1.919	23.785	0	92	15.135	7.533	0.811	45.655	3544	1.746	0.573	0.911	0.154984
445	CEP19_KAN631-15_1.tif:0002-0071	1.211	37.468	0	174	74.64	8.132	0.947	45.371	3522	1.218	0.821	0.979	0.154022
446	CEP19_KAN631-15_1.tif:0003-0137	1.172	29.176	0	118	100.794	15.554	0.948	34.202	2655	1.113	0.898	0.958	0.116107
447	CEP19_KAN631-15_1.tif:0004-0256	1.134	35.364	0	163	142.891	29.06	0.917	40.09	3112	1.233	0.811	0.941	0.136092
448	CEP19_KAN631-15_1.tif:0005-0325	1.945	35.887	0	134	65.058	36.865	0.905	69.809	5419	1.469	0.681	0.947	0.23698
449	CEP19_KAN631-15_1.tif:0006-0356	1.43	29.315	0	108	22.032	40.464	0.947	41.919	3254	1.221	0.819	0.941	0.142302
450	CEP19_KAN631-15_1.tif:0007-0471	1.082	16.345	0	73	41.938	53.471	0.985	17.687	1373	1.093	0.915	0.966	0.0600431
451	CEP19_KAN631-15_1.tif:0008-0478	1.636	35.126	0	132	85.31	54.332	0.913	57.468	4461	1.289	0.776	0.93	0.195085
452	CEP19_KAN631-15_1.tif:0009-0478	1.095	22.918	0	125	118.718	54.29	0.949	25.095	1948	1.04	0.962	0.934	0.0851886
453	CEP19_KAN631-15_1.tif:0010-0745	1.417	9.973	0	59	143.979	84.638	0.883	14.132	1097	1.335	0.749	0.936	0.0479733
454	CEP19_KAN631-15_1.tif:0011-0767	1.971	21.235	0	138	104.894	87.115	0.941	41.854	3249	1.148	0.871	0.942	0.142083
455	CEP19_KAN631-15_1.tif:0012-0845	1.456	12.735	0	99	53.087	95.964	0.947	18.538	1439	1.039	0.962	0.974	0.0629294
456	CEP19_KAN631-15_1.tif:0013-0851	1.481	33.826	0	114	20.597	96.631	0.924	50.112	3890	1.347	0.742	0.954	0.170115
457	CEP19_KAN631-15_1.tif:0014-0909	1.585	21.61	0	105	122.213	103.161	0.91	34.241	2658	1.561	0.641	0.935	0.116238
458	CEP19_KAN631-15_1.tif:0015-0975	1.507	18.188	0	96	72.471	110.689	0.886	27.413	2128	1.361	0.735	0.955	0.0930602
459	CEP19_KAN631-15_1.tif:0016-1178	0.966	17.827	0	92	109.978	133.722	0.961	17.224	1337	1.262	0.793	0.974	0.0584688
460	CEP19_KAN631-15_2.tif:0001-0018	1.069	24.036	0	83	59.216	2.059	0.94	25.7	1995	1.132	0.884	0.965	0.087244
461	CEP19_KAN631-15_2.tif:0002-0058	1.43	21.117	0	99	95.52	6.647	0.959	30.196	2344	1.047	0.955	0.965	0.102506
462	CEP19_KAN631-15_2.tif:0003-0173	1.765	23.394	0	136	22.964	19.602	0.958	41.288	3205	1.133	0.882	0.961	0.140159
463	CEP19_KAN631-15_2.tif:0004-0344	1.533	24.655	0	157	106.928	39.065	0.956	37.797	2934	1.156	0.865	0.964	0.128308
464	CEP19_KAN631-15_2.tif:0005-0367	1.237	24.49	0	83	136.347	41.727	0.855	30.286	2351	1.472	0.679	0.919	0.102812
465	CEP19_KAN631-15_2.tif:0006-0548	1.224	17.074	0	80	38.435	62.203	1	20.895	1622	1.178	0.849	0.95	0.0709322
466	CEP19_KAN631-15_2.tif:0007-0587	0.837	30.831	0	139	8.8	66.62	0.951	25.816	2004	1.226	0.816	0.956	0.0876376
467	CEP19_KAN631-15_2.tif:0008-0633	1.752	41.36	0	188	80.787	71.931	0.951	72.463	5625	1.278	0.782	0.954	0.245989
468	CEP19_KAN631-15_2.tif:0009-0637	1.082	350.798	0	2547	56.447	72.318	0.919	379.601	29467	1.206	0.829	0.971	1.28863
469	CEP19_KAN631-15_2.tif:0010-0742	1.443	50.009	0	146	30.806	84.224	0.985	72.153	5601	1.148	0.871	0.941	0.244939
470	CEP19_KAN631-15_2.tif:0011-0770	1.366	367.198	0	1781	132.463	87.431	0.927	501.416	38923	1.106	0.904	0.986	1.70215
471	CEP19_KAN631-15_2.tif:0012-0874	1.443	25.839	0	101	113.712	99.16	0.927	37.281	2894	1.346	0.743	0.961	0.126558
472	CEP19_KAN631-15_2.tif:0013-0968	1.327	19	0	80	48.872	109.874	0.901	25.211	1957	1.318	0.759	0.976	0.0855822
473	CEP19_KAN631-15_2.tif:0014-1009	0.876	20.191	0	60	95.724	114.532	0.956	17.687	1373	1.113	0.899	0.971	0.0600431
474	CEP19_KAN631-15_2.tif:0015-1033	0.812	244.635	0	1223	102.27	117.239	0.937	198.541	15412	1.039	0.963	0.992	0.673987
475	CEP19_KAN631-15_2.tif:0016-1087	1.391	14.769	0	54	134.499	123.367	0.933	20.547	1595	1.206	0.829	0.956	0.0697514
476	CEP19_KAN631-15_2.tif:0017-1103	1.095	15.588	0	88	20.878	125.195	0.949	17.069	1325	1.11	0.901	0.934	0.057944
477	CEP19_KAN631-15_2.tif:0018-1119	0.824	170.391	0	588	50.281	127.007	0.914	140.481	10905	1	1	1	0.47689
478	CEP19_KAN631-15_2.tif:0019-1198	0.915	16.437	0	59	49.891	136.02	0.982	15.034	1167	1.055	0.948	0.947	0.0510344
479	CEP19_KAN631-15_2.tif:0020-1226	0.902	194.071	0	398	93.467	139.151	0.947	175.005	13585	1.146	0.873	0.986	0.59409
480	CEP19_KAN631-15_3.tif:0001-0107	1.34	14.288	0	68	41.482	12.22	0.927	19.143	1486	1.217	0.821	0.95	0.0649847
481	CEP19_KAN631-15_3.tif:0002-0181	1.791	42.547	0	233	109.169	20.537	0.887	76.186	5914	1.649	0.607	0.949	0.258627
482	CEP19_KAN631-15_3.tif:0003-0256	1.636	41.024	0	189	14.869	29.102	0.913	67.117	5210	1.479	0.676	0.937	0.22784
483	CEP19_KAN631-15_3.tif:0004-0274	1.636	18.898	0	96	86.569	31.162	0.899	30.917	2400	1.222	0.818	0.948	0.104955
484	CEP19_KAN631-15_3.tif:0005-0316	1.288	15.33	0	101	123.053	35.907	0.932	19.748	1533	1.136	0.88	0.957	0.0670401
485	CEP19_KAN631-15_3.tif:0006-0396	1.7	20.856	0	111	13.484	44.961	0.949	35.465	2753	1.114	0.898	0.943	0.120392
486	CEP19_KAN631-15_3.tif:0007-0403	0.889	194.333	0	672	92.735	45.792	0.933	172.738	13409	1.172	0.853	0.979	0.586393
487	CEP19_KAN631-15_3.tif:0008-0456	1.829	23.12	0	97	127.582	51.79	0.945	42.292	3283	1.108	0.902	0.922	0.14357
488	CEP19_KAN631-15_3.tif:0009-0576	1.34	14.394	0	63	35.134	65.429	0.987	19.285	1497	1.085	0.922	0.941	0.0654658
489	CEP19_KAN631-15_3.tif:0010-0612	0.992	235.169	1	1105	113.959	69.467	0.917	233.272	18108	1.277	0.783	0.981	0.791887
490	CEP19_KAN631-15_3.tif:0011-0683	1.443	33.464	0	88	68.363	77.518	0.873	48.283	3748	1.193	0.838	0.926	0.163905
491	CEP19_KAN631-15_3.tif:0012-0805	1.7	28.985	0	130	127.844	91.428	0.961	49.287	3826	1.193	0.838	0.967	0.167316
492	CEP19_KAN631-15_3.tif:0013-0818	1.404	21	0	66	4.72	92.902	0.971	29.487	2289	1.116	0.896	0.956	0.100101
493	CEP19_KAN631-15_3.tif:0014-0819	1.456	33.097	0	104	134.74	92.977	0.935	48.18	3740	1.246	0.802	0.95	0.163555
494	CEP19_KAN631-15_3.tif:0015-0948	1.404	15.899	0	86	18.276	107.584	0.942	22.325	1733	1.223	0.818	0.96	0.0757864
495	CEP19_KAN631-15_3.tif:0016-1073	1.7	23.008	0	131	65.783	121.806	0.923	39.123	3037	1.347	0.742	0.957	0.132812
496	CEP19_KAN631-15_3.tif:0017-1239	1.056	11.427	0	84	8.56	140.604	0.997	12.071	937	1.113	0.898	0.965	0.0409762
497	CEP19_KAN631-15_3.tif:0018-1268	1.507	11.829	0	45	90.127	144.014	0.828	17.829	1384	1.335	0.749	0.903	0.0605241
498	CEP19_KAN631-15_4.tif:0001-0025	0.721	188.143	7	542	33.029	2.894	0.92	135.727	10536	1.143	0.875	1	0.460753
499	CEP19_KAN631-15_4.tif:0002-0034	1.52	18.983	0	109	31.192	3.854	0.92	28.856	2240	1.311	0.763	0.963	0.0979581
500	CEP19_KAN631-15_4.tif:0003-0057	1.481	19.165	0	84	12.032	6.518	0.981	28.392	2204	1.184	0.845	0.95	0.0963838
501	CEP19_KAN631-15_4.tif:0004-0410	1.636	24.228	0	110	87.479	46.604	0.951	39.639	3077	1.164	0.859	0.958	0.134561
502	CEP19_KAN631-15_4.tif:0005-0427	1.636	40.764	0	231	61.301	48.452	0.888	66.691	5177	1.113	0.899	0.927	0.226397
503	CEP19_KAN631-15_4.tif:0006-0503	1.623	57.135	0	258	128.713	57.072	0.943	92.739	7199	1.159	0.863	0.955	0.314822
504	CEP19_KAN631-15_4.tif:0007-0610	0.721	156.571	0	557	86.43	69.235	0.92	112.952	8768	1.143	0.875	1	0.383436
505	CEP19_KAN631-15_4.tif:0008-0641	0.812	228.762	0	1010	48.004	72.76	0.937	185.659	14412	1.039	0.963	0.992	0.630256
506	CEP19_KAN631-15_4.tif:0009-0708	1.069	22.928	0	109	32.248	80.422	0.908	24.515	1903	1.387	0.721	0.971	0.0832207
507	CEP19_KAN631-15_4.tif:0010-0728	1.456	17.584	0	130	53.671	82.69	0.935	25.597	1987	1.328	0.753	0.958	0.0868941
508	CEP19_KAN631-15_4.tif:0011-0756	1.597	22.315	0	88	127.449	85.854	0.917	35.645	2767	1.271	0.787	0.919	0.121005
509	CEP19_KAN631-15_4.tif:0012-0766	1.198	24	0	168	35.587	86.94	0.895	28.753	2232	1.29	0.775	0.935	0.0976083
510	CEP19_KAN631-15_4.tif:0013-0778	1.585	48.35	0	183	75.952	88.373	0.895	76.611	5947	1.242	0.805	0.939	0.26007
511	CEP19_KAN631-15_4.tif:0014-0872	1.546	21.925	0	104	53.135	98.966	0.952	33.893	2631	1.095	0.913	0.938	0.115057
512	CEP19_KAN631-15_4.tif:0015-0919	1.456	13.354	0	69	135.678	104.285	0.881	19.439	1509	1.251	0.8	0.926	0.0659906
513	CEP19_KAN631-15_4.tif:0016-0930	2.151	26.461	0	167	94.464	105.67	0.716	56.927	4419	2.479	0.403	0.946	0.193249
514	CEP19_KAN631-15_4.tif:0017-0963	1.069	50.024	0	137	142.9	109.352	0.94	53.487	4152	1.237	0.809	0.971	0.181572
515	CEP19_KAN631-15_4.tif:0018-0999	0.76	20.644	0	65	6.578	113.405	0.994	15.691	1218	1.112	0.899	0.967	0.0532647
516	CEP19_KAN631-15_4.tif:0019-1105	1.082	30.893	0	90	46.788	125.409	0.846	33.429	2595	1.582	0.632	0.939	0.113483
517	CEP19_KAN631-15_4.tif:0020-1224	1.314	12.029	0	48	54.089	138.905	0.921	15.807	1227	1.17	0.855	0.967	0.0536583
										4781.85				0.209117
sgSafe
518	CEP19_KAN631-16_1.tif:0001-0009	1.765	169.08	0	1038	48.573	1.025	0.907	298.404	23164	1.284	0.779	0.961	1.01299
519	CEP19_KAN631-16_1.tif:0002-0090	1.881	195.842	0	1703	127.89	10.268	0.862	368.342	28593	1.432	0.698	0.945	1.25041
520	CEP19_KAN631-16_1.tif:0003-0162	1.417	155.145	0	447	20.615	18.431	0.98	219.849	17066	1.026	0.975	0.965	0.746319
521	CEP19_KAN631-16_1.tif:0004-0261	1.198	149.817	0	476	112.541	29.668	0.937	179.488	13933	1.202	0.832	0.969	0.609308
522	CEP19_KAN631-16_1.tif:0005-0288	1.675	172.692	0	1205	18.002	32.717	0.885	289.207	22450	1.332	0.751	0.932	0.981768
523	CEP19_KAN631-16_1.tif:0006-0327	1.713	147.955	0	1046	29.485	37.119	0.93	253.497	19678	1.226	0.816	0.943	0.860545
524	CEP19_KAN631-16_1.tif:0007-0357	1.726	269.44	0	1765	140.028	40.502	0.912	465.114	36105	1.071	0.934	0.934	1.57892
525	CEP19_KAN631-16_1.tif:0008-0443	0.812	108.27	0	401	28.835	50.274	0.937	87.87	6821	1.039	0.963	0.992	0.298291
526	CEP19_KAN631-16_1.tif:0009-0463	0.721	208.946	0	1208	108.847	52.607	0.92	150.735	11701	1.143	0.875	1	0.5117
527	CEP19_KAN631-16_1.tif:0010-0526	1.752	260.816	0	2007	93.602	59.678	0.951	456.946	35471	1.135	0.881	0.951	1.55119
528	CEP19_KAN631-16_1.tif:0011-0659	1.945	215.172	0	1279	87.04	74.827	0.928	418.557	32491	1.337	0.748	0.941	1.42087
529	CEP19_KAN631-16_1.tif:0012-0750	1.907	276.209	0	1852	138.331	85.166	0.874	526.614	40879	1.417	0.706	0.955	1.78769
530	CEP19_KAN631-16_1.tif:0013-0800	1.804	178.964	0	1305	119.481	90.836	0.917	322.765	25055	1.427	0.701	0.94	1.09569
531	CEP19_KAN631-16_1.tif:0014-0829	1.816	119.766	0	741	100.367	94.091	0.899	217.543	16887	1.273	0.786	0.937	0.738491
532	CEP19_KAN631-16_1.tif:0015-0840	1.688	132.931	0	494	51.985	95.314	0.877	224.332	17414	1.434	0.697	0.97	0.761537
533	CEP19_KAN631-16_1.tif:0016-0881	0.902	172.529	0	467	139.038	100.05	0.947	155.579	12077	1.146	0.873	0.986	0.528143
534	CEP19_KAN631-16_1.tif:0017-0949	1.069	158.337	0	631	31.32	107.828	0.865	169.299	13142	1.33	0.752	0.922	0.574717
535	CEP19_KAN631-16_1.tif:0018-0956	1.121	199.207	0	649	50.07	108.568	0.919	223.262	17331	1.118	0.895	0.983	0.757907
536	CEP19_KAN631-16_1.tif:0019-1100	1.211	130.33	0	594	5.225	124.901	0.934	157.82	12251	1.297	0.771	0.94	0.535752
537	CEP19_KAN631-16_1.tif:0020-1145	1.301	164.98	0	784	24.124	129.968	0.941	214.657	16663	1.092	0.916	0.962	0.728695
538	CEP19_KAN631-16_1.tif:0021-1146	1.301	266.713	0	1332	63.017	130.117	0.941	347.022	26938	1.139	0.878	0.962	1.17803
539	CEP19_KAN631-16_1.tif:0022-1263	1.056	205.22	0	762	6.482	143.417	0.962	216.783	16828	1.154	0.867	0.965	0.735911
540	CEP19_KAN631-16_2.tif:0001-0011	1.494	109.293	0	503	36.488	1.25	0.96	163.321	12678	1.245	0.803	0.955	0.554426
541	CEP19_KAN631-16_2.tif:0002-0020	2.216	214.297	0	1586	95.395	2.358	0.901	474.827	36859	1.217	0.822	0.95	1.61189
542	CEP19_KAN631-16_2.tif:0003-0152	1.739	172.941	0	1428	19.577	17.257	0.944	300.762	23347	1.129	0.886	0.944	1.021
543	CEP19_KAN631-16_2.tif:0004-0207	1.018	342.633	0	2491	78.031	23.551	0.941	348.697	27068	1.064	0.94	0.988	1.18372
544	CEP19_KAN631-16_2.tif:0005-0212	1.61	123.256	0	457	71.633	24.095	0.936	198.477	15407	1.065	0.939	0.947	0.673768
545	CEP19_KAN631-16_2.tif:0006-0240	0.799	201.79	0	545	36.207	27.24	0.96	161.17	12511	1.081	0.925	0.984	0.547123
546	CEP19_KAN631-16_2.tif:0007-0335	1.391	210.667	0	1184	87.62	38.031	0.933	293.097	22752	1.267	0.789	0.964	0.994975
547	CEP19_KAN631-16_2.tif:0008-0339	0.876	71.618	0	253	31.95	38.477	0.994	62.737	4870	1.122	0.891	0.971	0.212972
548	CEP19_KAN631-16_2.tif:0009-0355	1.752	293.61	0	2272	53.1	40.334	0.926	514.401	39931	1.158	0.863	0.944	1.74624
549	CEP19_KAN631-16_2.tif:0010-0367	1.726	177.776	0	1210	6.488	41.682	0.937	306.881	23822	1.328	0.753	0.954	1.04177
550	CEP19_KAN631-16_2.tif:0011-0420	1.443	232.33	0	1710	110.636	47.671	0.938	335.209	26021	1.221	0.819	0.97	1.13793
551	CEP19_KAN631-16_2.tif:0012-0458	0.824	188.953	0	537	5.562	51.983	0.914	155.785	12093	1	1	1	0.528843
552	CEP19_KAN631-16_2.tif:0013-0487	1.43	297.36	0	1752	139.971	55.29	0.902	425.204	33007	1.266	0.79	0.974	1.44344
553	CEP19_KAN631-16_2.tif:0014-0630	1.791	256.065	0	1570	66.582	71.502	0.946	458.518	35593	1.2	0.833	0.955	1.55653
554	CEP19_KAN631-16_2.tif:0015-0653	1.546	277.608	0	1700	103.997	74.07	0.925	429.146	33313	1.138	0.879	0.927	1.45682
555	CEP19_KAN631-16_2.tif:0016-0684	0.721	156.214	0	572	77.918	77.634	0.92	112.694	8748	1.143	0.875	1	0.382562
556	CEP19_KAN631-16_2.tif:0017-0732	2.023	250.987	0	1970	19.085	83.222	0.823	507.625	39405	1.608	0.622	0.946	1.72323
557	CEP19_KAN631-16_2.tif:0018-0794	1.34	227.077	0	1465	52.835	90.14	0.927	304.227	23616	1.223	0.817	0.941	1.03276
558	CEP19_KAN631-16_2.tif:0019-0907	2.035	204.962	0	1831	103.052	102.974	0.923	417.179	32384	1.121	0.892	0.946	1.41619
559	CEP19_KAN631-16_2.tif:0020-0949	1.275	206.354	0	1249	16.954	107.696	0.952	263.172	20429	1.18	0.847	0.957	0.893387
560	CEP19_KAN631-16_2.tif:0021-0953	1.585	157.252	0	1010	62.169	108.203	0.932	249.169	19342	1.158	0.863	0.976	0.845851
561	CEP19_KAN631-16_2.tif:0022-0962	1.533	173.202	0	931	30.228	109.206	0.956	265.516	20611	1.194	0.838	0.964	0.901346
562	CEP19_KAN631-16_2.tif:0023-1100	1.546	184.867	0	833	42.905	124.931	0.964	285.78	22184	1.146	0.873	0.972	0.970136
563	CEP19_KAN631-16_2.tif:0024-1118	1.61	169.616	0	1044	25.541	126.889	0.936	273.13	21202	1.259	0.794	0.951	0.927191
564	CEP19_KAN631-16_2.tif:0025-1139	1.713	158.534	0	976	73.025	129.309	0.915	271.622	21085	1.211	0.826	0.967	0.922075
565	CEP19_KAN631-16_2.tif:0026-1158	1.043	57.309	0	137	107.614	131.477	0.95	59.799	4642	1.115	0.897	0.959	0.203001
566	CEP19_KAN631-16_2.tif:0027-1210	1.378	244.925	0	1426	127.316	137.331	0.924	337.605	26207	1.275	0.785	0.96	1.14607
567	CEP19_KAN631-16_3.tif:0001-0027	1.842	193.161	0	1447	111.528	3.116	0.844	355.834	27622	1.513	0.661	0.938	1.20795
568	CEP19_KAN631-16_3.tif:0002-0186	1.147	128.528	0	292	23.841	21.121	0.959	147.36	11439	1.113	0.899	0.952	0.500243
569	CEP19_KAN631-16_3.tif:0003-0224	2.01	175.038	0	1533	3.752	25.481	0.889	351.763	27306	1.381	0.724	0.945	1.19413
570	CEP19_KAN631-16_3.tif:0004-0235	1.585	257.024	0	1744	60.265	26.724	0.948	407.26	31614	1.181	0.847	0.95	1.38252
571	CEP19_KAN631-16_3.tif:0005-0337	1.636	208.087	0	1556	25.701	38.298	0.924	340.439	26427	1.295	0.772	0.951	1.15569
572	CEP19_KAN631-16_3.tif:0006-0366	1.778	241.993	0	1310	112.098	41.528	0.993	430.203	33395	1.12	0.893	0.958	1.46041
573	CEP19_KAN631-16_3.tif:0007-0387	1.932	237.62	0	1466	67.784	43.994	0.983	459.162	35643	1.008	0.992	0.962	1.55872
574	CEP19_KAN631-16_3.tif:0008-0516	1.816	253.383	0	1882	83.477	58.56	0.886	460.244	35727	1.175	0.851	0.953	1.56239
575	CEP19_KAN631-16_3.tif:0009-0588	0.979	74.816	0	159	94.13	66.789	0.939	73.248	5686	1.037	0.964	0.968	0.248656
576	CEP19_KAN631-16_3.tif:0010-0598	1.842	150.881	0	586	23.275	67.868	0.912	277.947	21576	1.341	0.746	0.944	0.943547
577	CEP19_KAN631-16_3.tif:0011-0670	2.048	269.604	0	2386	107.958	76.07	0.906	552.223	42867	1.204	0.83	0.946	1.87463
578	CEP19_KAN631-16_3.tif:0012-0691	2.319	209.656	0	1951	116.233	78.538	0.789	486.15	37738	1.875	0.533	0.935	1.65033
579	CEP19_KAN631-16_3.tif:0013-0798	1.262	181.378	0	465	141.552	90.651	0.974	228.982	17775	1.131	0.884	0.956	0.777324
580	CEP19_KAN631-16_3.tif:0014-0861	1.327	409.049	0	2443	112.118	97.803	0.93	542.755	42132	1.185	0.844	0.981	1.84249
581	CEP19_KAN631-16_3.tif:0015-0883	1.585	162.415	0	1030	47.503	100.273	0.895	257.349	19977	1.333	0.75	0.943	0.873621
582	CEP19_KAN631-16_3.tif:0016-0901	1.816	209.411	0	1439	129.421	102.279	0.876	380.374	29527	1.358	0.737	0.925	1.29125
583	CEP19_KAN631-16_3.tif:0017-0970	1.262	185.051	0	805	20.22	110.171	0.943	233.62	18135	1.125	0.889	0.947	0.793067
584	CEP19_KAN631-16_3.tif:0018-1011	1.636	287.591	0	1922	77.197	114.772	0.951	470.511	36524	1.06	0.943	0.948	1.59724
585	CEP19_KAN631-16_3.tif:0019-1085	0.979	57.039	0	231	108.96	123.148	0.974	55.845	4335	1.245	0.803	0.974	0.189575
586	CEP19_KAN631-16_3.tif:0020-1202	2.126	127.17	0	882	109.183	136.569	0.886	270.308	20983	1.335	0.749	0.946	0.917614
587	CEP19_KAN631-16_4.tif:0001-0055	1.778	179.587	0	1145	50.736	6.34	0.914	319.261	24783	1.161	0.861	0.952	1.08379
588	CEP19_KAN631-16_4.tif:0002-0097	1.275	113.273	0	385	67.867	11.063	0.952	144.462	11214	1.323	0.756	0.966	0.490403
589	CEP19_KAN631-16_4.tif:0003-0125	1.907	147.642	0	1243	105.834	14.23	0.91	281.49	21851	1.318	0.759	0.943	0.955573
590	CEP19_KAN631-16_4.tif:0004-0185	1.868	145.683	0	955	143.911	21.053	0.965	272.125	21124	1.153	0.867	0.927	0.92378
591	CEP19_KAN631-16_4.tif:0005-0190	1.778	211.413	0	1180	78.827	21.567	0.929	375.84	29175	1.207	0.829	0.939	1.27586
592	CEP19_KAN631-16_4.tif:0006-0223	1.108	221.988	0	1105	103.966	25.367	0.974	245.935	19091	1.11	0.901	0.977	0.834875
593	CEP19_KAN631-16_4.tif:0007-0337	1.378	203.617	0	1120	138.342	38.31	0.908	280.666	21787	1.107	0.903	0.986	0.952774
594	CEP19_KAN631-16_4.tif:0008-0358	0.992	285.896	0	1853	133.522	40.7	0.951	283.59	22014	1.123	0.89	0.981	0.962701
595	CEP19_KAN631-16_4.tif:0009-0404	1.108	231.105	0	1145	30.088	45.902	0.94	256.035	19875	1.16	0.862	0.983	0.86916
596	CEP19_KAN631-16_4.tif:0010-0414	1.056	126.659	0	320	25.405	47.051	0.897	133.795	10386	1.428	0.7	0.965	0.454193
597	CEP19_KAN631-16_4.tif:0011-0455	0.747	129.155	0	324	40.118	51.693	0.898	96.501	7491	1.392	0.718	0.959	0.327591
598	CEP19_KAN631-16_4.tif:0012-0476	1.224	229.905	0	996	102.373	54.011	0.957	281.361	21841	1.073	0.932	0.979	0.955136
599	CEP19_KAN631-16_4.tif:0013-0518	2.048	188.283	0	1652	82.947	58.813	0.883	385.656	29937	1.333	0.75	0.952	1.30918
600	CEP19_KAN631-16_4.tif:0014-0581	2.01	179.808	0	1191	125.014	65.951	0.911	361.347	28050	1.083	0.923	0.937	1.22666
601	CEP19_KAN631-16_4.tif:0015-0582	1.765	173.65	0	968	2.502	66.116	0.932	306.469	23790	1.201	0.832	0.951	1.04037
602	CEP19_KAN631-16_4.tif:0016-0602	1.43	182.054	0	919	98.748	68.34	0.902	260.325	20208	1.276	0.784	0.965	0.883722
603	CEP19_KAN631-16_4.tif:0017-0611	1.494	197.009	0	1392	44.925	69.424	0.96	294.398	22853	1.33	0.752	0.959	0.999392
604	CEP19_KAN631-16_4.tif:0018-0628	1.391	164.602	0	926	69.462	71.335	0.916	229.008	17777	1.112	0.9	0.991	0.777412
605	CEP19_KAN631-16_4.tif:0019-0650	1.262	184.327	0	766	135.993	73.844	0.974	232.705	18064	1.158	0.864	0.956	0.789963
606	CEP19_KAN631-16_4.tif:0020-0811	2.074	236.826	0	1522	27.3	92.08	0.908	491.187	38129	1.301	0.768	0.936	1.66743
607	CEP19_KAN631-16_4.tif:0021-0816	1.559	263.926	0	1339	134.555	92.601	0.917	411.395	31935	1.13	0.885	0.96	1.39656
608	CEP19_KAN631-16_4.tif:0022-0855	1.417	199.791	0	719	6.53	97.087	0.98	283.113	21977	1.184	0.844	0.969	0.961083
609	CEP19_KAN631-16_4.tif:0023-0914	1.662	204.767	0	1412	82.478	103.727	0.878	340.285	26415	1.337	0.748	0.925	1.15516
610	CEP19_KAN631-16_4.tif:0024-0918	1.417	119.764	0	450	92.458	104.265	0.95	169.711	13174	1.11	0.901	0.961	0.576116
611	CEP19_KAN631-16_4.tif:0025-0996	1.958	187.829	0	835	108.78	113.072	0.944	367.788	28550	1.195	0.837	0.971	1.24853
612	CEP19_KAN631-16_4.tif:0026-1069	0.992	201.039	0	808	16.638	121.388	0.951	199.417	15480	1.06	0.944	0.975	0.676961
613	CEP19_KAN631-16_4.tif:0027-1148	1.533	161.193	0	1142	90.43	130.31	0.902	247.107	19182	1.34	0.746	0.96	0.838854
614	CEP19_KAN631-16_4.tif:0028-1179	1.069	213.723	0	1037	45.269	133.886	0.974	228.518	17739	1.119	0.894	0.965	0.77575
615	CEP19_KAN631-16_4.tif:0029-1252	1.932	190.48	0	1615	80.843	142.166	0.946	368.072	28572	1.286	0.778	0.943	1.24949
										22866.9				1

## Sheet: IF condition
Exp. number	Cell line	Culture condition	Fixation condition	rabbit-Alexa488	mouse IgG1-Alexa568	mouse IgG2b-Alexa647	Nuclear stain	Date	Replicate
KAN631-1	RPE-BFP-Cas9 pMCB306 (pool)	serum starved for 24 hours	fixed in 4% PFA at RT for 15 mintues	CEP19, CA5883, in house, 1:1000	CEP170, Invitrogen, 41-3200, 1:1000	Ac-Tub, 6B-11, Santa Cruz, 1:1000	DAPI	No.6	2021-03-17
KAN631-2	RPE-BFP-Cas9 CEP164KO (pool)	serum starved for 24 hours	fixed in 4% PFA at RT for 15 mintues	CEP19, CA5883, in house, 1:1000	CEP170, Invitrogen, 41-3200, 1:1000	Ac-Tub, 6B-11, Santa Cruz, 1:1000	DAPI	No.6	2021-03-17
KAN631-3	RPE-BFP-Cas9 CEP83 KO (pool)	serum starved for 24 hours	fixed in 4% PFA at RT for 15 mintues	CEP19, CA5883, in house, 1:1000	CEP170, Invitrogen, 41-3200, 1:1000	Ac-Tub, 6B-11, Santa Cruz, 1:1000	DAPI	No.6	2021-03-17
KAN631-4	RPE-BFP-Cas9 SCLT1 KO (pool)	serum starved for 24 hours	fixed in 4% PFA at RT for 15 mintues	CEP19, CA5883, in house, 1:1000	CEP170, Invitrogen, 41-3200, 1:1000	Ac-Tub, 6B-11, Santa Cruz, 1:1000	DAPI	No.6	2021-03-17
KAN631-5	RPE-BFP-Cas9 FBF1 KO (pool)	serum starved for 24 hours	fixed in 4% PFA at RT for 15 mintues	CEP19, CA5883, in house, 1:1000	CEP170, Invitrogen, 41-3200, 1:1000	Ac-Tub, 6B-11, Santa Cruz, 1:1000	DAPI	No.6	2021-03-17
KAN631-6	RPE-BFP-Cas9 CEP89KO (pool)	serum starved for 24 hours	fixed in 4% PFA at RT for 15 mintues	CEP19, CA5883, in house, 1:1000	CEP170, Invitrogen, 41-3200, 1:1000	Ac-Tub, 6B-11, Santa Cruz, 1:1000	DAPI	No.6	2021-03-17
KAN631-7	RPE-BFP-Cas9 CCDC92 KO (pool)	serum starved for 24 hours	fixed in 4% PFA at RT for 15 mintues	CEP19, CA5883, in house, 1:1000	CEP170, Invitrogen, 41-3200, 1:1000	Ac-Tub, 6B-11, Santa Cruz, 1:1000	DAPI	No.6	2021-03-17
KAN631-8	RPE-BFP-Cas9 ANKRD26 KO (pool)	serum starved for 24 hours	fixed in 4% PFA at RT for 15 mintues	CEP19, CA5883, in house, 1:1000	CEP170, Invitrogen, 41-3200, 1:1000	Ac-Tub, 6B-11, Santa Cruz, 1:1000	DAPI	No.6	2021-03-17
KAN631-9	RPE-BFP-Cas9 TTBK2 KO (pool)	serum starved for 24 hours	fixed in 4% PFA at RT for 15 mintues	CEP19, CA5883, in house, 1:1000	CEP170, Invitrogen, 41-3200, 1:1000	Ac-Tub, 6B-11, Santa Cruz, 1:1000	DAPI	No.6	2021-03-17
KAN631-10	RPE-BFP-Cas9 INPP5E KO (pool)	serum starved for 24 hours	fixed in 4% PFA at RT for 15 mintues	CEP19, CA5883, in house, 1:1000	CEP170, Invitrogen, 41-3200, 1:1000	Ac-Tub, 6B-11, Santa Cruz, 1:1000	DAPI	No.6	2021-03-17
KAN631-11	RPE-BFP-Cas9 Kiz KO (pool)	serum starved for 24 hours	fixed in 4% PFA at RT for 15 mintues	CEP19, CA5883, in house, 1:1000	CEP170, Invitrogen, 41-3200, 1:1000	Ac-Tub, 6B-11, Santa Cruz, 1:1000	DAPI	No.6	2021-03-17
KAN631-12	RPE-BFP-Cas9 LRRC45 KO (pool)	serum starved for 24 hours	fixed in 4% PFA at RT for 15 mintues	CEP19, CA5883, in house, 1:1000	CEP170, Invitrogen, 41-3200, 1:1000	Ac-Tub, 6B-11, Santa Cruz, 1:1000	DAPI	No.6	2021-03-17
KAN631-13	RPE-BFP-Cas9 NCS1 KO (pool)	serum starved for 24 hours	fixed in 4% PFA at RT for 15 mintues	CEP19, CA5883, in house, 1:1000	CEP170, Invitrogen, 41-3200, 1:1000	Ac-Tub, 6B-11, Santa Cruz, 1:1000	DAPI	No.6	2021-03-17
KAN631-14	RPE-BFP-Cas9 C3orf14 KO (pool)	serum starved for 24 hours	fixed in 4% PFA at RT for 15 mintues	CEP19, CA5883, in house, 1:1000	CEP170, Invitrogen, 41-3200, 1:1000	Ac-Tub, 6B-11, Santa Cruz, 1:1000	DAPI	No.6	2021-03-17
KAN631-15	RPE-BFP-Cas9 FOP KO (pool)	serum starved for 24 hours	fixed in 4% PFA at RT for 15 mintues	CEP19, CA5883, in house, 1:1000	CEP170, Invitrogen, 41-3200, 1:1000	Ac-Tub, 6B-11, Santa Cruz, 1:1000	DAPI	No.6	2021-03-17
KAN631-16	RPE-BFP-Cas9 sgSafe (pool)	serum starved for 24 hours	fixed in 4% PFA at RT for 15 mintues	CEP19, CA5883, in house, 1:1000	CEP170, Invitrogen, 41-3200, 1:1000	Ac-Tub, 6B-11, Santa Cruz, 1:1000	DAPI	No.6	2021-03-17

## Sheet: Post ROUT
sgSafe	CEP164 KO	CEP83 KO	SCLT1 KO	FBF1 KO	CEP89 KO	CCDC92 KO	ANKRD26 KO	TTBK2 KO	INPP5E KO	KIZ KO	LRRC45 KO	FOP KO
1.01299	0.0967337	0.534703	0.585125	0.928022	2.01606	1.14948	1.10715	0.208642	0.498624	0.924349	0.989027	0.154984
1.25041	0.0432065	0.123541	0.933008	1.5707	1.57485	1.42678	0.365375	0.104124	0.679366	1.34347	1.32458	0.154022
0.746319	0.0940661	0.251368	1.10072	0.929553	1.20672	0.764074	1.47545	0.461846	0.162287	1.46211	0.886259	0.116107
0.609308	0.844146	0.282679	1.64006	0.503741	0.766566	0.682209	0.835356	0.0477109	0.908999	0.984479	0.174138	0.136092
0.981768	0.447022	0.577428	0.962001	1.24254	0.497662	1.00184	1.2097	0.0840516	1.06696	1.38943	1.33035	0.23698
0.860545	0.129576	0.378276	0.0666465	1.32576	1.84822	1.43172	1.48577	0.33695	1.69638	0.609571	1.00066	0.142302
1.57892	0.0982643	1.49736	1.1277	1.38445	0.60183	1.64583	0.861245	0.0846638	1.38751	1.03184	1.24884	0.0600431
0.298291	0.0827834	0.778767	0.438581	1.02948	1.79255	0.515024	0.820618	0.112083	2.22238	0.908387	1.09171	0.195085
0.5117	0.0851886	0.233788	1.15442	0.605635	1.51765	1.82972	0.65492	0.0879437	1.4402	0.490184	1.23187	0.0851886
1.55119	0.0604804	0.067871	0.550184	1.13876	1.30376	1.33249	1.15284	0.0756989	0.997074	0.890413	0.50912	0.0479733
1.42087	0.11204	0.38676	0.460447	0.809904	1.21577	0.763374	1.46697	0.0778855	0.952949	1.09132	1.45433	0.142083
1.78769	0.0915297	0.109547	0.585606	1.02865	0.428917	1.56016	0.801682	0.0545767	1.53567	0.636028	0.943372	0.0629294
1.09569	0.72594	0.0614862	0.589629	1.57586	1.54105	0.931171	1.14182	0.149911	1.18136	0.746537	0.91569	0.170115
0.738491	0.107404	0.971316	0.72817	0.543405	0.804131	1.43417	0.847732	0.115713	0.898591	0.682558	0.559367	0.116238
0.761537	0.0416322	0.817907	1.30542	0.587968	0.830064	1.51118	1.21341	0.0812091	1.1964	1.43391	0.816114	0.0930602
0.528143	0.0899116	0.935719	0.48966	0.785589	0.158307	0.9512	0.949669	0.0847076	1.63061	0.925617	0.307781	0.0584688
0.574717	0.11755	0.689206	0.963095	0.877731	1.34937	1.00656	0.782965	0.0757864	1.4765	1.26467	0.456293	0.087244
0.757907	0.0404515	0.217082	1.48363	1.06368	1.2184	1.3164	0.408844	0.0521715	0.903183	1.36503	1.08882	0.102506
0.535752	0.152797	0.965281	1.52382	1.09219	0.642894	0.978357	1.57949	0.216208	0.879087	1.37671	0.415448	0.140159
0.728695	0.122929	1.02935	1.23178	1.05266	1.02292	1.35252	1.09844	0.0471861	1.07601	0.91088	0.913329	0.128308
1.17803	0.133643	0.0482794	1.00962	0.516073	1.42402	1.3244	1.32939	0.13443	1.60271	0.859845	1.25128	0.102812
0.735911	0.0687894	0.275945	0.544717	1.10255	1.29038	0.882236	0.643244	0.0793723	0.639046	1.06263	0.73766	0.0709322
0.554426	0.16854	0.490447	1.06162	0.997817	1.52439	0.904757	0.598332	0.093104	0.982118	1.14664	0.73661	0.0876376
1.61189	0.107492	0.231601	0.635591	1.03407	1.45485	1.22618	0.741464	0.160319	0.982293	0.958109	0.747499	0.245989
1.021	0.0828271	1.09989	0.159182	0.713214	1.14003	1.8797	1.42415	0.596014	0.646699	0.317621	1.30188	1.28863
1.18372	0.410506	0.451089	0.540607	0.827222	1.47803	1.12481	1.18525	0.44947	0.667908	0.28749	1.42044	0.244939
0.673768	0.0629294	0.618579	0.365681	0.942235	1.29042	1.09188	1.42481	0.563959	0.782135	1.58924	1.13216	1.70215
0.547122	0.0436438	1.0084	0.656844	0.0842703	2.01234	0.902046	1.69594	0.797134	0.752047	1.13137	1.14642	0.126558
0.994975	0.948795	0.822761	0.12376	1.04387	0.986885	1.10535	1.15284	0.105917	0.899422	1.09044	1.07688	0.0855822
0.212972	0.0427692	1.37981	0.581408	1.0269	1.01321	1.48682	0.851186	0.122972	1.35265	1.47361	0.12271	0.0600431
1.74624	0.115451	0.21389	0.755458	0.590985	1.33477	1.56361	1.59357	0.0596058	0.720517	1.15975	1.58176	0.673987
1.04177	0.0722879	0.166835	0.670926	1.01334	1.03285	0.581889	1.06691	0.120261	1.13404	1.28894	1.34539	0.0697515
1.13793	0.0364719	0.151748	1.49981	1.06481	1.58955	0.710678	1.5222	0.0892119	1.24389	1.1957	1.35781	0.057944
0.528843	0.143001	1.17069	1.05865	1.38217	1.28089	0.779642	1.02782	0.513143	1.47335	1.38672	0.851536	0.47689
1.44344	0.134343	0.138366	0.309312	1.13994	1.12372	0.531642	0.946433	0.0833519	1.6286	0.794642	0.974115	0.0510345
1.55653	0.569819	0.370054	0.316527	0.876594	1.09398	0.834131	0.696421	0.112258	1.17843	1.25596	1.48188	0.59409
1.45682	0.14838	0.696203	0.658419	0.602618	1.20615	1.38095	0.878693	0.0841828	0.770152	1.45665	1.6342	0.0649847
0.382562	0.0892993	1.37408	1.09634	1.27004	1.52049	1.11454	1.00814	0.0393145	1.40771	0.597851	1.16872	0.258627
1.72323	0.145975	0.784627	1.7531	1.32978	1.08983	0.989771	1.20462	0.569032	0.499674	1.27446	1.34023	0.22784
1.03276	0.0497662	0.210785	0.777368	1.30735	1.04391	0.924261	0.544324	0.0781916	0.882104	0.491759	0.732893	0.104955
1.41619	0.135042	0.755896	0.408319	1.12578	0.888883	1.22679	1.15927	0.100669	0.760619	0.739846	1.12884	0.0670401
0.893387	0.0655095	0.300653	0.356104	0.791537	1.18634	1.13513	1.37264	0.0460928	0.889582	1.15516	0.924436	0.120392
0.845851	0.068352	0.456686	1.07986	0.653565	1.00328	0.823548	1.27354	0.0591247	1.06604	1.26615	0.777543	0.586393
0.901346	0.0768359	0.866623	0.365419	0.676174	1.35488	0.720605	0.567326	0.157214	1.07828	1.95754	0.832076	0.14357
0.970136	0.648273	0.145756	2.28081	0.800983	1.26991	1.24	1.11384	0.118862	0.707267	0.688768	0.456205	0.0654658
0.927191	0.0531336	0.174794	0.725371	1.06359	0.328466	0.826784	1.11887	0.111777	0.976826	1.39136	0.868679	0.791887
0.922075	0.0600868	1.23318	0.347402	1.01229	0.81056	0.981943	0.819525	0.107404	0.699351	0.606291	0.285697	0.163905
0.203001	0.126821	0.335332	0.470986	0.794379	1.08843	0.360477	0.97359	0.0567633	0.461103	0.792062	1.20991	0.167316
1.14607	0.175231	0.475491	0.41173	0.896623	1.38217	0.937162	0.376658	0.0528712	0.737397	1.71042	1.15919	0.100101
1.20795	0.0461803	0.365288	0.478333	1.17077	0.662092	1.09341	0.820399	0.0404077	0.883722	1.3223	1.337	0.163555
0.500243	0.16666	0.0601743	1.94324	0.969392	0.603973	0.711377	0.425724	0.0563259	1.07881	0.781304	1.55465	0.0757864
1.19413	0.129795	0.172083	0.659687	0.667515	0.248394	1.58347	1.48044	0.0610052	0.940311	0.763986	0.467094	0.132812
1.38252	0.0912673	0.24389	0.469018	0.434471	0.895399	0.472036	1.0182	0.0661655	0.581189	0.159969	1.4144	0.0409762
1.15569	0.0873314	0.952556	0.382474	0.803213	0.76438	0.64062	1.05016	0.0853198	0.967468	1.21175	0.199109	0.0605241
1.46041	0.0892993	1.34325	1.32537	1.07981	0.510957	1.48271	1.07981	0.476671	1.57599	1.10387	1.26935	0.460753
1.55872	0.39883	0.314078	0.654177	0.292825	1.44908	0.691523	0.425112	2.55933	0.91088	0.55272	0.64753	0.0979581
1.56239	0.0966899	0.341454	0.706436	0.962876	1.84253	0.480345	0.875676	0.0261076	1.60599	0.766697	0.953561	0.0963838
0.248656	0.128526	0.63511	0.518129	0.766041	1.28469	0.940748	0.86518	0.0512968	0.696815	0.784584	0.33039	0.134561
0.943547	0.0503785	0.364807	1.25601	0.607384	1.16299	1.40749	0.503697	0.428261	0.953999	0.726508	0.975033	0.226397
1.87463	0.026851	0.171952	0.6432	0.598376	1.51647	0.591947	0.941185	0.216995	0.289589	0.501904	1.5417	0.314822
1.65033	0.0300434	0.14838	0.566889	1.18661	1.89636	0.522939	1.05414	0.121179	0.151354	0.122666	0.982949	0.383436
0.777324		0.854291	0.485243	0.889408	1.11703	0.642194	0.91757	0.086107	0.957453	0.863912	0.229196	0.630256
1.84249		1.1165	0.59081	0.887265	0.539863	1.05712	1.27026	0.806362	1.48704	1.28946	0.471773	0.0832207
0.873621		0.460534	0.710765	0.978095	0.934888	1.43819	0.878999	0.16701	0.867629	0.967468	1.0628	0.0868941
1.29125		0.121923	0.511394	0.800545	0.599381	0.585519	1.35047	0.0834393	1.01487	1.48214	1.07925	0.121005
0.793067		1.08305	0.577909	2.5365	0.678798	1.27494	0.279968	0.0601306	0.843009	0.571656	0.704686	0.0976083
1.59724		0.338918	0.463464	0.949582	0.927323	1.00635	1.31483	0.0968649	0.978095	0.46622	0.82521	0.26007
0.189575		0.0839641	1.30389	0.646086	1.35786	0.64355	1.21271	0.859714	0.702587	1.03713	0.457386	0.115057
0.917614		0.483231	0.443698	1.12604	0.5424	0.84349	0.946258	0.0658594	1.32375	0.484193	1.0248	0.0659906
1.08379		0.537589	0.522064	1.58299	1.27726		0.637471	0.07032	1.27481	0.629206	0.908737	0.193249
0.490403		0.425375	0.413655	0.842353	0.200115		1.76097	0.118556	0.604848	1.08926	1.30472	0.181572
0.955573		0.70473	0.759263	0.945427	1.6966		1.02296	0.249094	1.70946	0.193292	0.4674	0.0532647
0.92378		1.02371	0.572662	1.04881	2.64067		0.780517	0.0367343	0.396249	1.11336	0.913547	0.113483
1.27586		0.137141	0.266805	1.18818	1.41235		0.719861	0.0901302	0.228933	1.0084	0.839379	0.0536583
0.834875		0.422007	0.860807	1.33879	0.882629		0.881536	0.0876376	0.607778	1.03171	1.06175
0.952774		0.340623	0.633055	0.726465	0.277169		0.593609	0.0503347	0.814015	1.35335	0.943984
0.962701		0.260333	0.644643		1.04404		0.974377	0.0759176	1.46124	0.990952	0.692529
0.86916		0.413436	0.465826		0.194255				0.247038	0.894786	1.14887
0.454193		0.280974	0.841697		0.477371				0.899203	0.933839	1.70648
0.327591		0.316484	0.896711		0.149867				1.08471	0.881317	1.12442
0.955136		0.423538	0.639571		1.07352				1.26602	1.27932	1.23379
1.30918		0.186776	0.313641		0.857921				0.941666	0.68234	1.27984
1.22666		0.727252	0.457386		1.03503				0.999436	1.05218	0.868679
1.04037		1.07566	0.482837						1.00429	0.496569	0.944115
0.883722		1.89107	0.381862						0.791581	0.674118	2.22662
0.999392		0.630781	0.331615						0.635985		0.778286
0.777412		0.949582	0.829015								0.677617
0.789963		0.542487	0.644949								1.21359
1.66743		0.146806	1.54971								0.830064
1.39656		0.0677398	0.986666								0.853635
0.961083		0.459485	1.13557								0.658594
1.15516		0.586787	0.679628								0.733199
0.576116		0.200858	0.452269								0.817907
1.24853		0.717981	0.443567
0.676961		0.420214	0.654745
0.838854		0.853242	0.757339
0.77575		0.634104	0.421789
1.24949			0.718024
			1.29156
			1.71523
			0.225129
			0.561685
			0.309137
			0.424762
			0.613026
			0.808417
			1.29908
			1.1277
			0.617923
			0.604323
			0.64718
			0.556656
			0.688375
			0.731319
			0.686407
