# Supplementary material for: A hierarchical pathway for assembly of the distal appendages that organize primary cilia
Source: eLife. 2025 Jan 30;14:e85999. doi: 10.7554/eLife.85999 (PMC11984956; doi:10.7554/eLife.85999)
Supplement: Source data 4. [file elife-85999-data4.xlsx]

## Sheet: Sheet1
Name	Species	Source	Note	Figures
293T	Homo Sapiens	ATCC	Maintained in the Jackson lab for a long time. Authenticated by short tandem repeat based test on March 2022. Showed 91% identity with the database
RPE-hTERT	Homo Sapiens	ATCC	Maintained in the Jackson lab for a long time. Authenticated by short tandem repeat based test on March 2022. Showed 100% identity with the database	Fig.1, Fig.3, Fig.1S4, Fig.3S2, Fig.3S4, Fig.3S5, Fig.3S6
RPE-BFP-Cas9	Homo Sapiens	This paper	RPE-hTERT cells stably expressing BFP-Cas9	Fig.4G, 4H, Fig.4S2A, Fig.4S2C-E
RPE-BFP-Cas9 CEP83 knockout_clone 6 and 10	Homo Sapiens	This paper
RPE-BFP-Cas9 SCLT1 knockout_clone 1, 2, 4, and 6	Homo Sapiens	This paper
RPE-BFP-Cas9 CEP89 knockout_clone 2, 4, 5, and 6	Homo Sapiens	This paper
RPE-BFP-Cas9 KIZ knockout_clone 1, 2, and 12	Homo Sapiens	This paper
RPE-BFP-Cas9 C3orf14 knockout_clone 5, 9, 10, 13, and 23	Homo Sapiens	This paper
RPE-BFP-Cas9 LRRC45 knockout_clone 1, 3, 5, and 6	Homo Sapiens	This paper
RPE-BFP-Cas9 FBF1 knockout_Clone 42 and 46	Homo Sapiens	This paper
RPE-BFP-Cas9 CEP164 knockout_clone 1, 2, 3, and 4	Homo Sapiens	Kanie et al. 2017
RPE-BFP-Cas9 ANKRD26 knockout clone 5, 9, 12	Homo Sapiens	This paper
RPE-BFP-Cas9 TTBK2 knockout clone 2, 4, and 9	Homo Sapiens	This paper
RPE-BFP-Cas9 INPP5E knockout clone 2, 3, 4, and 5	Homo Sapiens	This paper
RPE-BFP-Cas9 RAB34 knockout clone 1, 3, 4, 6, 8, 9	Homo Sapiens	This paper		Fig.4S1A
RPE-BFP-Cas9 MYO5A knockout clone 2, 3, 4, 5, 7, 9	Homo Sapiens	This paper		Fig.4S1A
RPE-BFP-Cas9 NCS1 knockout clone 1, 2, and 3	Homo Sapiens	This paper
RPE-BFP-Cas9 sgSafe clone 1, 2, 3, 4, 5, 6	Homo Sapiens	This paper	sgSafe: non-targeting guide RNA
RPE-BFP-Cas9 pMCB306 clone 1, 2, 3, 4, 5, 6	Homo Sapiens	Kanie et al. 2017	pMCB306: sgGFP
RPE-BFP-Cas9 FOP knockout clone 1, 2, 3, and 4	Homo Sapiens	Kanie et al. 2017
RPE-BFP-Cas9 CEP83 knockout (pool)	Homo Sapiens	This paper	Mixture of the single cell clones of CEP83 knockout cells listed above	Fig.2, Fig.5, Fig.1S2B, Fig.2S1, Fig.3S1A, Fig.5S1
RPE-BFP-Cas9 SCLT1 knockout (pool)	Homo Sapiens	This paper	Mixture of the single cell clones of SCLT1 knockout cells listed above	Fig.2, Fig.5, Fig.2S1, Fig.5S1
RPE-BFP-Cas9 CEP89 knockout (pool)	Homo Sapiens	This paper	Mixture of the single cell clones of CEP89 knockout cells listed above	Fig.2, Fig.5, Fig.2S1, Fig.5S1
RPE-BFP-Cas9 KIZ knockout (pool)	Homo Sapiens	This paper	Mixture of the single cell clones of KIZ knockout cells listed above	Fig.2, Fig.5, Fig.2S1, Fig.5S1
RPE-BFP-Cas9 C3orf14 knockout_clone 5, 9, 10, 13, and 23	Homo Sapiens	This paper	Mixture of the single cell clones of C3ORF14 knockout cells listed above	Fig.2, Fig.2S1
RPE-BFP-Cas9 LRRC45 knockout (pool)	Homo Sapiens	This paper	Mixture of the single cell clones of LRRC45 knockout cells listed above	Fig.2, Fig.5, Fig.5S1,Fig.2S1
RPE-BFP-Cas9 FBF1 knockout (pool)	Homo Sapiens	This paper	Mixture of the single cell clones of FBF1 knockout cells listed above	Fig.2, Fig.5, Fig.2S1, Fig.5S1
RPE-BFP-Cas9 CEP164 knockout (pool)	Homo Sapiens	Kanie et al. 2017	Mixture of the single cell clones of CEP164 knockout cells listed above	Fig.2, Fig.5, Fig.2S1, Fig.5S1
RPE-BFP-Cas9 ANKRD26 knockout (pool)	Homo Sapiens	This paper	Mixture of the single cell clones of ANKRD26 knockout cells listed above	Fig.2, Fig.5, Fig.2S1, Fig.5S1
RPE-BFP-Cas9 TTBK2 knockout (pool)	Homo Sapiens	This paper	Mixture of the single cell clones of TTBK2 knockout cells listed above	Fig.2, Fig.5, Fig.2S1, Fig.5S1
RPE-BFP-Cas9 INPP5E knockout (pool)	Homo Sapiens	This paper	Mixture of the single cell clones of INPP5E knockout cells listed above	Fig.2, Fig.5, Fig.2S1, Fig.5S1
RPE-BFP-Cas9 RAB34 knockout (pool)	Homo Sapiens	This paper	Mixture of the single cell clones of RAB34 knockout cells listed above	Fig.4A-G, Fig.3S1B Fig.5S1
RPE-BFP-Cas9 MYO5A knockout (pool)	Homo Sapiens	This paper	Mixture of the single cell clones of MYO5A knockout cells listed above	Fig.4A, Fig.4E, Fig.4F, Fig.3S1C Fig.5S1
RPE-BFP-Cas9 NCS1 knockout (pool)	Homo Sapiens	This paper	Mixture of the single cell clones of NCS1 knockout cells listed above	Fig.2,Fig.2S1
RPE-BFP-Cas9 sgSafe (pool)	Homo Sapiens	This paper	Mixture of the single cell clones of sgSafe cells listed above	Fig.2, Fig.4K, Fig.5, Fig.5S1
RPE-BFP-Cas9 pMCB306 (pool)	Homo Sapiens	Kanie et al. 2017	Mixture of the single cell clones of sgGFP cells listed above	Fig.4, Fig.5A-B, Fig.5D, Fig.1S1B, Fig.2S1, Fig.4S2B, Fig.5S1
RPE-BFP-Cas9 FOP knockout (pool)	Homo Sapiens	Kanie et al. 2017	Mixture of the single cell clones of FOP knockout cells listed above	Fig.4I-K, Fig.4S2B
RPE-BFP-Cas9 sgIFT52#1	Homo Sapiens	This paper	mixed population. Post-Cre, post-GFP-negative bulk sorting	Fig.4G, 4H, 4K, Fig.4S2A-E
RPE-BFP-Cas9 sgLRRC45#1	Homo Sapiens	This paper	mixed population. Post-Cre, post-GFP-negative bulk sorting	Fig.2H-I, Fig.5D
RPE-hTERT stably expressing N-terminally GFP tagged CEP83	Homo Sapiens	This paper	Generated via lenti-viral infection of pWPXLd/LAPN/blast/CEP83	Fig. 1S4A, B, E, F
RPE-hTERT stably expressing C-terminally GFP tagged CEP83	Homo Sapiens	This paper	Generated via lenti-viral infection of pWPXLd/LAPC/blast/CEP83	Fig. 1S4C, D, G, H
