# Supplementary material for: A hierarchical pathway for assembly of the distal appendages that organize primary cilia
Source: eLife. 2025 Jan 30;14:e85999. doi: 10.7554/eLife.85999 (PMC11984956; doi:10.7554/eLife.85999)
Supplement: Source data 5. [file elife-85999-data5.xlsx]

## Sheet: Sheet1
Name	Supplier	Catalog number	Application	Fixation method for IF	Figures
CEP83 antibody	Proteintech	26013-1-AP	IF	4% PFA at RT for 15 minutes	Fig.1A, Fig.1D, Fig.1S1A, Fig.2C
			WB	N.A.	Fig.1S2B, Fig.2S1A
CEP83 antibody	SIGMA	HPA038161	IF	100% methanol at -20℃ for 5 minutes	Fig.1A, Fig.1D, Fig.1S1A, Fig.2B
			WB	N.A.	Fig.1S2B, Fig.2S1A
CEP164 antibody	Proteintech	22227-1-AP	IF	4% PFA at RT for 15 minutes	Fig.1D, Fig.2A., Fig.3G, Fig.3S3F
			WB	N.A.	Fig.2S1A
CEP164 antibody	SIGMA	HPA037605	IF	4% PFA at RT for 15 minutes	Fig.3E, Fig.3S1B, Fig.3S1C, Fig.3S3A
CEP164 antibody	Santa Cruz	sc-515403	IF	100% methanol at -20℃ for 5 minutes	Fig.1A, Fig.1S1A, Fig.4D, Fig.5D
TTBK2 antibody	SIGMA	HPA018113	IF	4% PFA at RT for 15 minutes	Fig.1A, Fig.1D, Fig.1S1A, Fig.2H
FBF1 antibody	Proteintech	11531-1-AP	IF	100% methanol at -20℃ for 5 minutes	Fig.1A, Fig.1D, Fig.1S1A, Fig.2E
KIZ antibody	Proteintech	21177-1-AP	IF	100% methanol at -20℃ for 5 minutes	Fig.1A, Fig.1D, Fig.1S1A, Fig.2I
			WB	N.A.	Fig.2S1A
ANKRD26 antibody	in house	N.A.	IF	100% methanol at -20℃ for 5 minutes	Fig.1A, Fig.1D, Fig.1S1A, Fig.2G
			WB	N.A.	Fig.2S1A
PIDD1 antibody	Enzo Life Sciences	ALX-804-837-C100	IF	100% methanol at -20℃ for 5 minutes	Fig.1A, Fig.1D, Fig.1S1A, Fig.2K
SCLT1 antibody	Sigma	HPA036561	IF	100% methanol at -20℃ for 5 minutes	Fig.1A, Fig.1D, Fig.1S1A, Fig.2D
SCLT1 antibody	Proteintech	14875-1-AP	WB	N.A.	Fig.2S1A
CEP89 antibody	Proteintech	24002-1-AP	IF	100% methanol at -20℃ for 5 minutes	Fig.1A, Fig.1D, Fig.1S1A, Fig.2F
			WB	N.A.	Fig.2S1A
LRRC45 antibody	Gift from Dr. Gislene Pereira	N.A.	IF	100% methanol at -20℃ for 5 minutes	Fig.1A, Fig.1D, Fig.1S1A, Fig.2J
INPP5E antibody	Proteintech	17797-1-AP	IF	4% PFA at RT for 15 minutes	Fig.1S4B
				100% methanol at -20℃ for 5 minutes	Fig.1A, Fig.1S1A
CEP170 antibody	Invitrogen	41-3200	IF	4% PFA at RT for 15 minutes or 100% methanol at -20℃ for 5 minutes	Fig.1A, Fig.1S1A, Fig.2L, Fig.3, Fig.3S1, Fig.3S3, Fig.4, Fig.4S2, Fig.5
Ninein antibody	Abcam	ab52473	IF	100% methanol at -20℃ for 5 minutes	Fig.1A, Fig.1S1A
CP110 antibody	Proteintech	12780-1-AP	IF	Fig.4D	Fig.4D, Fig.5D
FGFR1OP antibody	Abnova	H00011116-M01	IF	100% methanol at -20℃ for 5 minutes	Fig.4D, Fig.5D
			IF (3D-STORM)	100% methanol at -20℃ for 5 minutes	Fig.3H, Fig.3J, Fig.3S4, Fig.3S5, Fig.3S6
EHD1 antibody	Gift from Dr. Steve Caplan	N.A.	IF	4% PFA at RT for 15 minutes	Fig.3C, Fig.3S2F
PACSIN2 antibody	Abcam	ab37615	IF	4% PFA at RT for 15 minutes	Fig.3D, Fig.3S2G
IFT88 antibody	Proteintech	13967-1-AP	IF	4% PFA at RT for 15 minutes	Fig.1S4C, Fig.4E, Fig.4G, Fig.4J, Fig.5E
			WB	N.A.	Fig.2S1A
NCS1 antibody	Proteintech	10506-2-AP	WB	N.A.	Fig.2S1A
MYO5A antibody	Santa Cruz	sc-365986	IF	4% PFA at RT for 15 minutes	Fig.3B, Fig.3S1A, Fig.3S1C, Fig.3S3, Fig.4K, Fig.5C
			IF (3D-STORM)	100% methanol at -20℃ for 5 minutes	Fig.3H, Fig.3J, Fig.3S4, Fig.3S5, Fig.3S6
MYO5A antibody	NOVUS	NBP1-92156	WB	N.A.	Fig.4S1A
RAB34 antibody	Proteintech	27435-1-AP	IF	4% PFA at RT for 15 minutes	Fig.3A, Fig.3B, Fig.3S1A, Fig.4K, Fig.5C
			IF (3D-STORM)	100% methanol at -20℃ for 5 minutes	Fig.3H, Fig.3J, Fig.3S4, Fig.3S5, Fig.3S6
			WB	N.A.	Fig.4S1A
RAB34 antibody	Santa Cruz	sc-376710	IF	4% PFA at RT for 15 minutes	Fig.3C, Fig.3D, Fig.3F-G. Fig.3S1B, Fig.3S3
			IF (3D-STORM)	100% methanol at -20℃ for 5 minutes	Fig.3S6
CEP19 antibody	in house (Kanie et al., 2017, Dev.Cell)		IF	4% PFA at RT for 15 minutes	Fig.4F, Fig.5F
IFT81 antibody	Proteintech	11744-1-AP	IF	4% PFA at RT for 15 minutes	Fig.4S2C
IFT57 antibody	Proteintech	11083-1-AP	IF	4% PFA at RT for 15 minutes	Fig.4H
IFT52 antibody	Proteintech	17534-1-AP	WB	N.A.	Fig.4S2A
TRAF3IP1 antibody	Proteintech	14404-1-AP	IF	4% PFA at RT for 15 minutes	Fig.4S2D
CLUAP1 antibody	Proteintech	17470-1-AP	IF	4% PFA at RT for 15 minutes	Fig.4S2E
ARL13B antibody	Proteintech	17711-1-AP	IF	4% PFA at RT for 15 minutes	Fig.4A, Fig.5A, Fig.5B, Fig.5S1A-D.
GFP antibody	Invitrogen	A10262	IF	4% PFA at RT for 15 minutes	Fig.1S4A-D.
