# Supplementary material for: A hierarchical pathway for assembly of the distal appendages that organize primary cilia
Source: eLife. 2025 Jan 30;14:e85999. doi: 10.7554/eLife.85999 (PMC11984956; doi:10.7554/eLife.85999)
Supplement: Source data 6. [file elife-85999-data6.xlsx]

## Sheet: Sheet1
Primer name	Direction	Sequence	Purpose
C3orf14_G53_3F	Forward	TCAAAAGACCAGAGAGGCTAAAA	Genomic PCR to analyze C3orf14 knockout cells
C3orf14_G685_3R	Reverse	AGTTGATTGCAAACATTTAGCTT
sgCEP89#3_genomic PCR_261_F	Forward	GGCGACAGAGCAAGACTCTA	Genomic PCR to analyze CEP89 knockout cells
sgCEP89#3_genomic PCR_803_R	Reverse	GCTGTGAATGGAACTCCACA
LRRC45_gDNA for sgLRRC45#1_142-F	Forward	TTCGCGGTCTTACCTGGTTC	Genomic PCR to analyze LRRC45 knockout cells
LRRC45_gDNA for sgLRRC45#1_597-R	Reverse	TGCTCTGGAGATGGTCACAC
sgKiz#2_genomic PCR_259F	Forward	CACACCCGGCTTACTTTCTT	Genomic PCR to analyze KIZ knockout cells
sgKiz#2_genomic PCR_813R	Reverse	GGCATTTTCTCACCAATCTGA
sgSCLT1#3_genomic PCR_259F	Forward	CATGCTTCAGTTAATTGTGATCG	Genomic PCR to analyze SCLT1 knockout cells
sgSCLT1#3_genomic PCR_851R	Reverse	ATTAAACACATTTGTAACAACCAGTGA
sgCEP83#1_genomic PCR_213F	Forward	CGTTTACTGATCGCAAATTATGT	Genomic PCR to analyze CEP83 knockout cells
sgCEP83#1_genomic PCR_801R	Reverse	GGGGAACACATTTAGCCATC
FBF1_gDNA for sgFBF1#1_140-F	Forward	AATTAGCCAGGTGTGGTGGT	Genomic PCR to analyze FBF1 knockout cells
FBF1_gDNA for sgFBF1#1_664-R	Reverse	ACCCTCTCTCCCATTCAGGT
sgCEP89_F	Forward	TTGGCCAAATTGGCAGAGTGAGAGTTTAAGAGC	Generating pMCB306 containing sgCEP89
sgCEP89_R	Reverse	TTAGCTCTTAAACTCTCACTCTGCCAATTTGGCCAACAAG
sgC3ORF14_F	Forward	TTGGGGTGATCAACACACAGAAAGTTTAAGAGC	Generating pMCB306 containing sgC3ORF14
sgC3ORF14_R	Reverse	TTAGCTCTTAAACTTTCTGTGTGTTGATCACCCCAACAAG
sgNCS1_F	Forward	TTGGTTGTGGAGGAGCTGACCGTTTAAGAGC	Generating pMCB306 containing sgNCS1
sgNCS1_R	Reverse	TTAGCTCTTAAACGGTCAGCTCCTCCACAACCAACAAG
sgCEP164_F	Forward	TTGGGTTTCCACTCTCCAGGCAGGTTTAAGAGC	Generating pMCB306 containing sgCEP164
sgCEP164_R	Reverse	TTAGCTCTTAAACCTGCCTGGAGAGTGGAAACCCAACAAG
sgCEP83_F	Forward	TTGGCTAATTATCAGACACTGAGTTTAAGAGC	Generating pMCB306 containing sgCEP83
sgCEP83_R	Reverse	TTAGCTCTTAAACTCAGTGTCTGATAATTAGCCAACAAG
sgSCLT1_F	Forward	TTGGTTCCTACCTCTGTGCCCAGGTTTAAGAGC	Generating pMCB306 containing sgSCLT1
sgSCLT1_R	Reverse	TTAGCTCTTAAACCTGGGCACAGAGGTAGGAACCAACAAG
sgFBF1_F	Forward	TTGGTTCTCGCCTTTGAAGAAGTTTAAGAGC	Generating pMCB306 containing sgFBF1
sgFBF1_R	Reverse	TTAGCTCTTAAACTTCTTCAAAGGCGAGAACCAACAAG
sgANKRD26_F	Forward	TTGGTCCGAGACCGAGATCTGTTTAAGAGC	Generating pMCB306 containing sgANKRD26
sgANKRD26_R	Reverse	TTAGCTCTTAAACAGATCTCGGTCTCGGACCAACAAG
sgTTBK2_F	Forward	TTGGGAAAATGTTGCACTGAAGGGTTTAAGAGC	Generating pMCB306 containing sgTTBK2
sgTTBK2_R	Reverse	TTAGCTCTTAAACCCTTCAGTGCAACATTTTCCCAACAAG
sgINPP5E_F	Forward	TTGGGAAGGGAGGACGCTCCAGTTTAAGAGC	Generating pMCB306 containing sgINPP5E
sgINPP5E_R	Reverse	TTAGCTCTTAAACTGGAGCGTCCTCCCTTCCCAACAAG
sgKIZ_F	Forward	TTGGGTGCACGAGGGGATTAACTCGTTTAAGAGC	Generating pMCB306 containing sgKIZ
sgKIZ_R	Reverse	TTAGCTCTTAAACGAGTTAATCCCCTCGTGCACCCAACAAG
sgLRRC45_F	Forward	TTGGAAAGCGCAGCACGGTGTGTTTAAGAGC	Generating pMCB306 containing sgLRRC45
sgLRRC45_R	Reverse	TTAGCTCTTAAACACACCGTGCTGCGCTTTCCAACAAG
sgRAB34_F	Forward	TTGGCGGAGGGATCGCGTCCTGGGTTTAAGAGC	Generating pMCB306 containing sgRAB34
sgRAB34_R	Reverse	TTAGCTCTTAAACCCAGGACGCGATCCCTCCGCCAACAAG
sgMYO5A_F	Forward	TTGGCTACTGCAAAGATATGGTTTAAGAGC	Generating pMCB306 containing sgMYO5A
sgMYO5A_R	Reverse	TTAGCTCTTAAACCATATCTTTGCAGTAGCCAACAAG
sgIFT52_F	Forward	TTGGAAGAAATATCTTGACACGTTTAAGAGC	Generating pMCB306 containing sgIFT52
sgIFT52_R	Reverse	TTAGCTCTTAAACGTGTCAAGATATTTCTTCCAACAAG
