# Supplementary material for: A hierarchical pathway for assembly of the distal appendages that organize primary cilia
Source: eLife journal article supplement (doi:10.7554/elife.85999), 2025-01-30
Supplement: supp [file elife_poa_e85999_Figure_1_figure_supplement_2.pdf › elife_poa_e85999_Figure_1_figure_supplement_2.pdf]

1 20 30 40 50 60 70 80

Consensus  
Identity

1. hCEP83\_isoform1

2. hCEP83 isoform2

90 100 110 120 130 140 150 160 170

Consensus  
Identity

1. hCEP83\_isoform1

2. hCEP83 isoform2

180 190 200 210 220 230 240 250 260

Consensus  
Identity

1. hCEP83\_isoform1

2. hCEP83 isoform2

270 280 290 300 310 320 330 340 350

Consensus  
Identity

1. hCEP83\_isoform1

2. hCEP83 isoform2

360 370 380 390 400 410 420 430 440

Consensus  
Identity

1. hCEP83\_isoform1

2. hCEP83 isoform2

450 460 470 480 490 500 510 520

Consensus  
Identity

1. hCEP83\_isoform1

2. hCEP83 isoform2

530 540 550 560 570 580 590 600 610

Consensus  
Identity

1. hCEP83\_isoform1

2. hCEP83 isoform2

620 630 640 650 660 670 680 690 701

Consensus  
Identity

1. hCEP83\_isoform1

2. hCEP83 isoform2

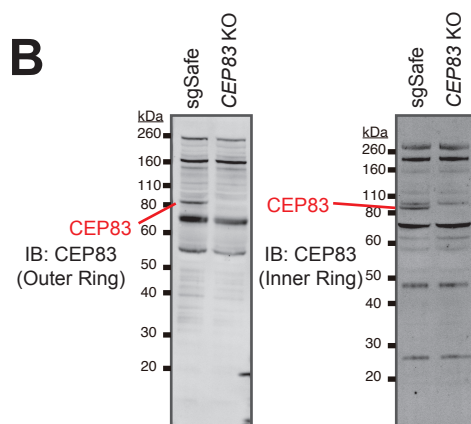

Kanie et al., Figure 1-figure supplement 2
