# Supplementary material for: A hierarchical pathway for assembly of the distal appendages that organize primary cilia
Source: eLife journal article supplement (doi:10.7554/elife.85999), 2025-01-30
Supplement: supp [file elife_poa_e85999_Figure_1_figure_supplement_2_source_data_2.pdf › elife_poa_e85999_Figure_1_figure_supplement_2_source_data_2.pdf]

Figure 1-figure supplement 2B\_CEP83

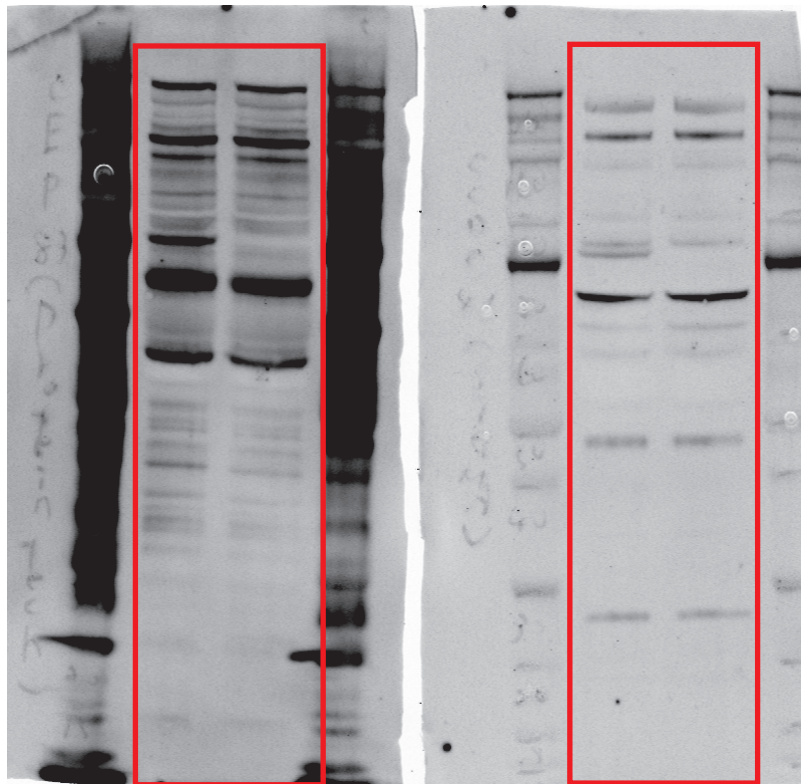

Outer Ring  
(Proteintech)

Inner Ring  
(SIGMA)
