# Supplementary material for: A hierarchical pathway for assembly of the distal appendages that organize primary cilia
Source: eLife journal article supplement (doi:10.7554/elife.85999), 2025-01-30
Supplement: supp [file elife_poa_e85999_Figure_1_figure_supplement_3.pdf › elife_poa_e85999_Figure_1_figure_supplement_3.pdf]

A

Homo Sapiens CEP83 (Q9Y592-1)

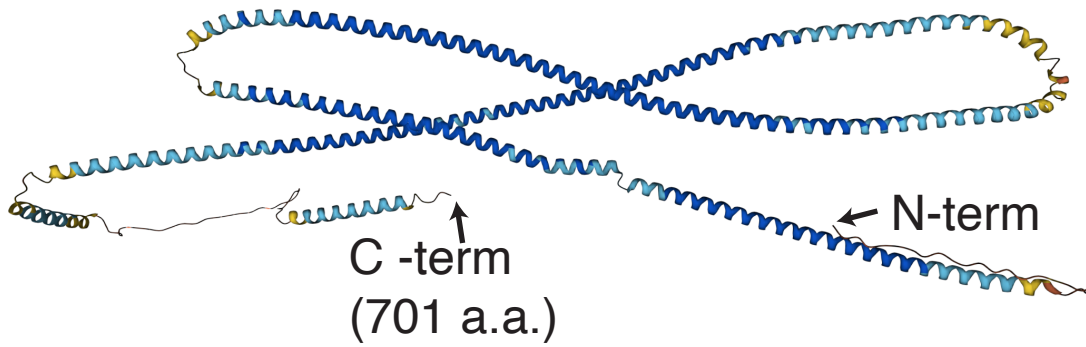

Model Confidence:

- Very high (pLDDT > 90)
- Confident (90 > pLDDT > 70)
- Low (70 > pLDDT > 50)
- Very low (pLDDT < 50)

Mus Musculus CEP83 (Q9D5R3)

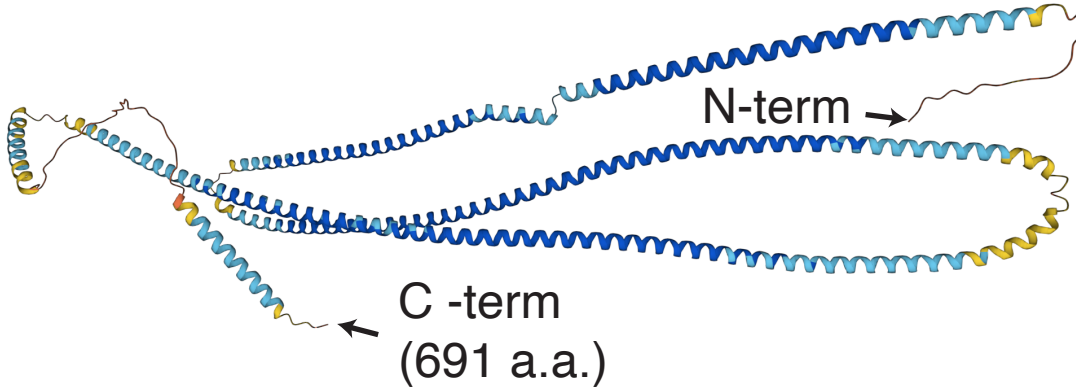

Model Confidence:

- Very high (pLDDT > 90)
- Confident (90 > pLDDT > 70)
- Low (70 > pLDDT > 50)
- Very low (pLDDT < 50)

Danio rerio CEP83 (F1R4Y7)

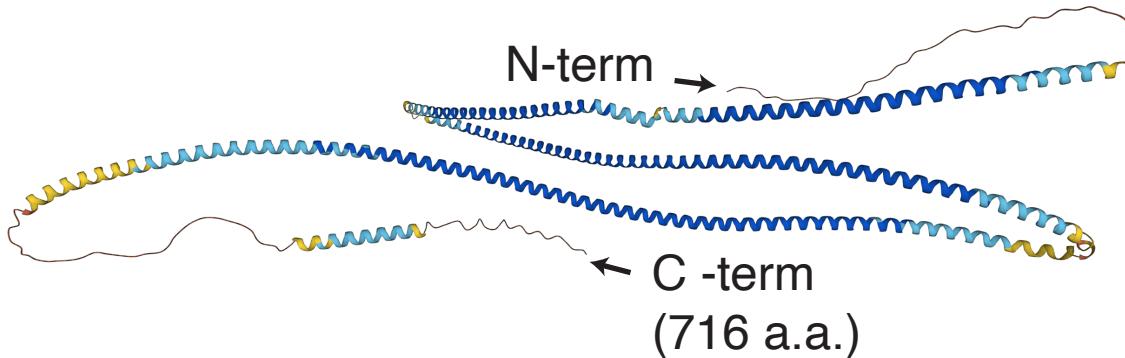

Model Confidence:

- Very high (pLDDT > 90)
- Confident (90 > pLDDT > 70)
- Low (70 > pLDDT > 50)
- Very low (pLDDT < 50)
