# Supplementary material for: A hierarchical pathway for assembly of the distal appendages that organize primary cilia
Source: eLife journal article supplement (doi:10.7554/elife.85999), 2025-01-30

**A****RPE-BFP-Cas9 gSafe**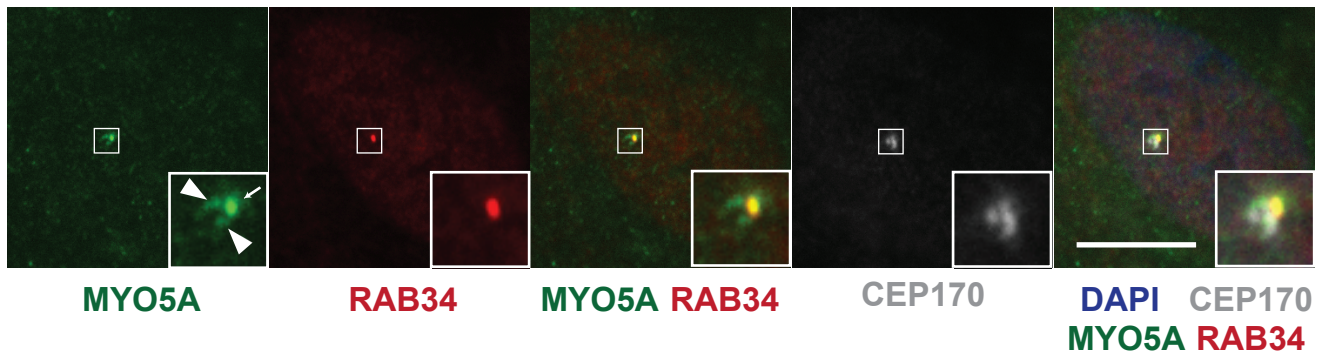**RPE-BFP-Cas9 *CEP83* knockout**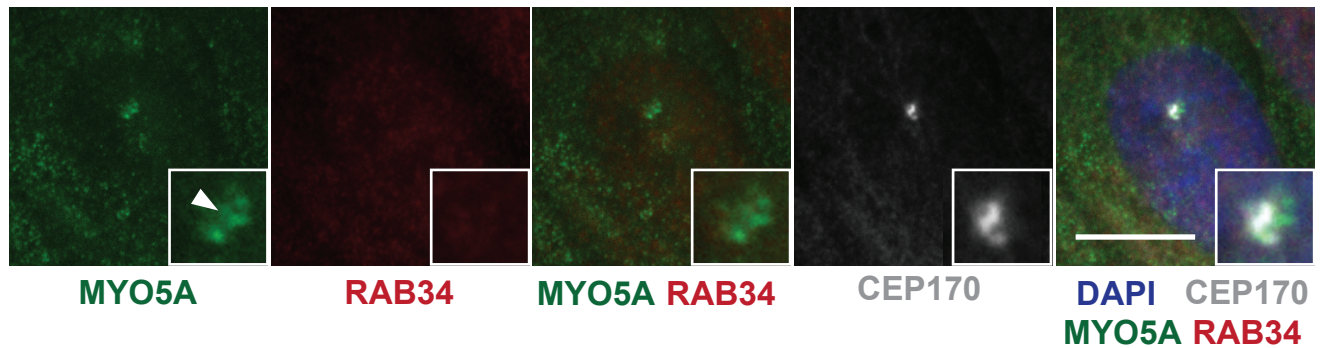**B****RPE-BFP-Cas9 pMCB306 (sgGFP)**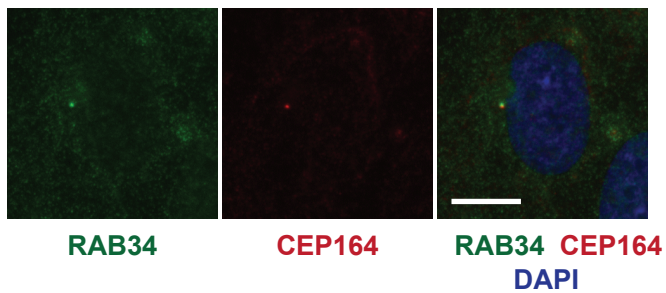**RPE-BFP-Cas9 *RAB34* knockout**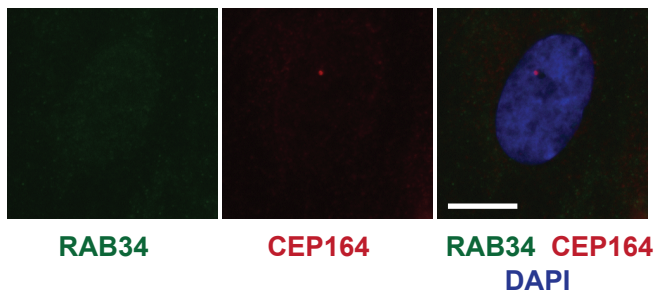**C****RPE-BFP-Cas9 pMCB306 (sgGFP)**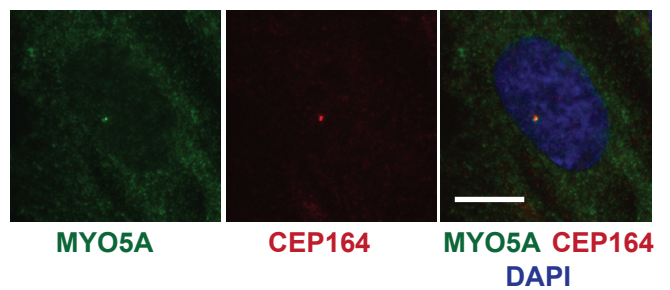**RPE-BFP-Cas9 *MYO5A* knockout**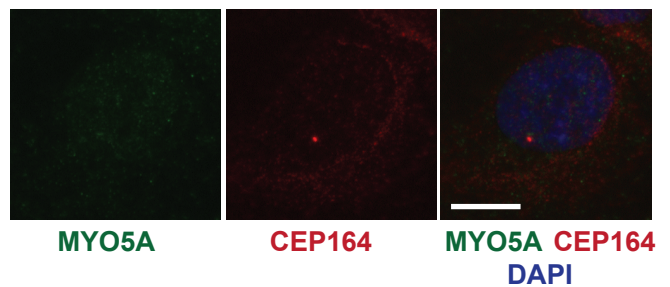

Supplement: supp [file elife_poa_e85999_Figure_3_figure_supplement_1.pdf › elife_poa_e85999_Figure_3_figure_supplement_1.pdf]
