# Supplementary material for: A hierarchical pathway for assembly of the distal appendages that organize primary cilia
Source: eLife journal article supplement (doi:10.7554/elife.85999), 2025-01-30
Supplement: supp [file Figure 1-figure supplement 5-Source Data 1.xlsx]

## Sheet: RawData_KAN658
	Ciliated	cell counts	ARL13B+ Ac-Tub- dot		Ciliated	cell counts	ARL13B+ Ac-Tub- dot		Ciliated	cell counts	ARL13B+ Ac-Tub- dot		Ciliated	cell counts	ARL13B+ Ac-Tub- dot		Ciliated	cell counts	ARL13B+ Ac-Tub- dot
KAN658-1	1	15		KAN658-2	20	23		KAN658-3	7	26		KAN658-4	11	12		KAN658-5	2	15
2		19		2	21	24		2	8	29		2	9	11		2	1	27
3	1	20		3	15	17		3	3	21		3	11	12		3	1	24
4	3	22		4	19	20		4	3	30		4	12	13		4	3	29
5	1	13		5	18	18		5	3	21		5	13	15		5	0	23
6	1	21		6	24	26		6	0	18		6	13	17		6	1	19
7				7				7				7				7
8				8				8				8				8
9				9				9				9				9										488	568	647	405	Date
10				10				10				10				10							KAN658-1	RPE-hTERT	+ FBS for 24 hours, fixed in 4% PFA at RT for 15 minutes.	INPP5E, Proteintech, 17797-1-AP, 1:500	CEP170, Invitrogen, 41-3200, 1:1000	Ac-Tub, 6B-11, Santa Cruz, 1:1000	DAPI	2021-05-14				+FBS for 24 hours		-FBS for 24 hours
	7	110	0		117	128	0		24	145	0		69	80	0		8	137	0				KAN658-2	RPE-hTERT	- FBS for 24 hours, fixed in 4% PFA at RT for 15 minutes.	INPP5E, Proteintech, 17797-1-AP, 1:500	CEP170, Invitrogen, 41-3200, 1:1000	Ac-Tub, 6B-11, Santa Cruz, 1:1000	DAPI	2021-05-14			KAN685-1	6.36364	KAN685-2	91.4062
		6.36364				91.4062				16.5517				86.25				5.83942					KAN658-3	RPE-hTERT	+ FBS for 24 hours, fixed in 4% PFA at RT for 15 minutes.	INPP5E, Proteintech, 17797-1-AP, 1:500	CEP170, Invitrogen, 41-3200, 1:1000	Ac-Tub, 6B-11, Santa Cruz, 1:1000	DAPI	2021-05-14			KAN685-3	16.5517	KAN685-4	86.25
																							KAN658-4	RPE-hTERT	- FBS for 24 hours, fixed in 4% PFA at RT for 15 minutes.	INPP5E, Proteintech, 17797-1-AP, 1:500	CEP170, Invitrogen, 41-3200, 1:1000	Ac-Tub, 6B-11, Santa Cruz, 1:1000	DAPI	2021-05-14			KAN685-5	5.83942	KAN685-6	80.2326
																							KAN658-5	RPE-hTERT	+ FBS for 24 hours, fixed in 4% PFA at RT for 15 minutes.	INPP5E, Proteintech, 17797-1-AP, 1:500	CEP170, Invitrogen, 41-3200, 1:1000	Ac-Tub, 6B-11, Santa Cruz, 1:1000	DAPI	2021-05-14			AVERAGE	9.58493		85.9629
																							KAN658-6	RPE-hTERT	- FBS for 24 hours, fixed in 4% PFA at RT for 15 minutes.	INPP5E, Proteintech, 17797-1-AP, 1:500	CEP170, Invitrogen, 41-3200, 1:1000	Ac-Tub, 6B-11, Santa Cruz, 1:1000	DAPI	2021-05-14			S.E.M.	3.48668		3.22876
	Ciliated	cell counts	ARL13B+ Ac-Tub- dot		Ciliated	cell counts	ARL13B+ Ac-Tub- dot		Ciliated	cell counts	ARL13B+ Ac-Tub- dot		Ciliated	cell counts	ARL13B+ Ac-Tub- dot		Ciliated	cell counts	ARL13B+ Ac-Tub- dot
KAN658-6	10	14		KAN658-7				KAN658-8				KAN658-9				KAN658-10
2	13	15		2				2				2				2
3	13	16		3				3				3				3
4	13	17		4				4				4				4
5	11	14		5				5				5				5
6	9	10		6				6				6				6
7				7				7				7				7
8				8				8				8				8
9				9				9				9				9
10				10				10				10				10
	69	86	0		0	0	0		0	0	0		0	0	0		0	0	0
		80.2326				#DIV/0!				#DIV/0!				#DIV/0!				#DIV/0!
	Ciliated	cell counts	ARL13B+ Ac-Tub- dot		Ciliated	cell counts	ARL13B+ Ac-Tub- dot		Ciliated	cell counts	ARL13B+ Ac-Tub- dot			Ciliated	cell counts	ARL13B+ Ac-Tub- dot			Ciliated	cell counts	ARL13B+ Ac-Tub- dot
KAN582-11				KAN582-12				KAN582-13					KAN582-14					KAN582-15	69	80
2				2				2					2					2	79	88
3				3				3					3					3	68	73
4				4				4					4					4
5				5				5					5					5
6				6				6					6					6
7				7				7					7					7
8				8				8					8					8
9				9				9					9					9
10				10				10					10					10
	0	0	0		0	0	0		0	0	0			0	0	0			216	241	0
		#DIV/0!				#DIV/0!				#DIV/0!					#DIV/0!					89.6266

## Sheet: IF condition
Exp. No.	Cell	Culture condition and fixation method	Primary antibody for 488 channel	Primary antibody for 568 channel	Primary antivody for 647 channel	Nuclear staining	Date
KAN658-1	RPE-hTERT	+ FBS for 24 hours, fixed in 4% PFA at RT for 15 minutes.	INPP5E, Proteintech, 17797-1-AP, 1:500	CEP170, Invitrogen, 41-3200, 1:1000	Ac-Tub, 6B-11, Santa Cruz, 1:1000	DAPI	2021-05-14
KAN658-2	RPE-hTERT	- FBS for 24 hours, fixed in 4% PFA at RT for 15 minutes.	INPP5E, Proteintech, 17797-1-AP, 1:500	CEP170, Invitrogen, 41-3200, 1:1000	Ac-Tub, 6B-11, Santa Cruz, 1:1000	DAPI	2021-05-14
KAN658-3	RPE-hTERT	+ FBS for 24 hours, fixed in 4% PFA at RT for 15 minutes.	INPP5E, Proteintech, 17797-1-AP, 1:500	CEP170, Invitrogen, 41-3200, 1:1000	Ac-Tub, 6B-11, Santa Cruz, 1:1000	DAPI	2021-05-14
KAN658-4	RPE-hTERT	- FBS for 24 hours, fixed in 4% PFA at RT for 15 minutes.	INPP5E, Proteintech, 17797-1-AP, 1:500	CEP170, Invitrogen, 41-3200, 1:1000	Ac-Tub, 6B-11, Santa Cruz, 1:1000	DAPI	2021-05-14
KAN658-5	RPE-hTERT	+ FBS for 24 hours, fixed in 4% PFA at RT for 15 minutes.	INPP5E, Proteintech, 17797-1-AP, 1:500	CEP170, Invitrogen, 41-3200, 1:1000	Ac-Tub, 6B-11, Santa Cruz, 1:1000	DAPI	2021-05-14
KAN658-6	RPE-hTERT	- FBS for 24 hours, fixed in 4% PFA at RT for 15 minutes.	INPP5E, Proteintech, 17797-1-AP, 1:500	CEP170, Invitrogen, 41-3200, 1:1000	Ac-Tub, 6B-11, Santa Cruz, 1:1000	DAPI	2021-05-14

## Sheet: Fig.1-S3B
	+FBS			-FBS
	KAN658_1-2	KAN658_3-4	KAN658_5-6	KAN658_1-2	KAN658_3-4	KAN658_5-6
	6.36364	16.5517	5.83942	91.4062	86.25	80.2326
	Table Analyzed	Data 1
	Column B	-FBS
	vs.	vs.
	Column A	+FBS
	Unpaired t test with Welch's correction
	P value	<0.0001
	P value summary	****
	Significantly different (P < 0.05)?	Yes
	One- or two-tailed P value?	Two-tailed
	Welch-corrected t, df	t=16.07, df=3.977
	How big is the difference?
	Mean of column A	9.585
	Mean of column B	85.96
	Difference between means (B - A) ± SEM	76.38 ± 4.752
	95% confidence interval	63.15 to 89.60
	R squared (eta squared)	0.9848
	F test to compare variances
	F, DFn, Dfd	1.166, 2, 2
	P value	0.9233
	P value summary	ns
	Significantly different (P < 0.05)?	No
	Data analyzed
	Sample size, column A	3
	Sample size, column B	3
