# Supplementary material for: A hierarchical pathway for assembly of the distal appendages that organize primary cilia
Source: eLife journal article supplement (doi:10.7554/elife.85999), 2025-01-30
Supplement: supp [file Figure 4-figure supplement 2-Source Data 3.xlsx]

## Sheet: Raw data
sgGFP (pMCB306)				LRRC45 KO				FOP KO				sgIFT52				sgSafe
Replicate 1
	Ciliated	cell counts	ARL13B+ Ac-Tub- dot		Ciliated	cell counts	ARL13B+ Ac-Tub- dot		Ciliated	cell counts	ARL13B+ Ac-Tub- dot		Ciliated	cell counts	ARL13B+ Ac-Tub- dot		Ciliated	cell counts	ARL13B+ Ac-Tub- dot
KAN647-1	44	53		KAN647-2	62	85		KAN647-3	0	57		KAN647-4	0	64		KAN647-5	70	81
2	46	57		2	69	86		2	0	63		2	2	78		2	53	65
3	48	56		3	65	83		3	0	52		3	1	81		3	52	62
4				4				4				4				4
5				5				5				5				5
6				6				6				6				6
7				7				7				7				7
8				8				8				8				8
9				9				9				9				9
10				10				10				10				10
	138	166	0		196	254	0		0	172	0		3	223	0		175	208	0
	sgGFP (pMCB306)	83.1325			LRRC45 KO	77.1654			FOP KO	0			sgIFT52	1.34529			sgSafe	84.1346
Replicate 2
	Ciliated	cell counts	ARL13B+ Ac-Tub- dot		Ciliated	cell counts	ARL13B+ Ac-Tub- dot		Ciliated	cell counts	ARL13B+ Ac-Tub- dot		Ciliated	cell counts	ARL13B+ Ac-Tub- dot		Ciliated	cell counts	ARL13B+ Ac-Tub- dot
KAN647-11	77	93		KAN647-12	72	82		KAN647-13	0	58		KAN647-14	3	69		KAN582-15	72	84
2	60	75		2	66	71		2	0	55		2	1	58		2	78	89
3	47	59		3	78	91		3	0	49		3	3	65		3	65	76
4				4				4				4				4
5				5				5				5				5
6				6				6				6				6
7				7				7				7				7
8				8				8				8				8
9				9				9				9				9
10				10				10				10				10
	184	227	0		216	244	0		0	162	0		7	192	0		215	249	0
	sgGFP (pMCB306)	81.0573			LRRC45 KO	88.5246			FOP KO	0			sgIFT52	3.64583			sgSafe	86.3454
Replicate 3
	Ciliated	cell counts	ARL13B+dot		Ciliated	cell counts	ARL13B+dot		Ciliated	cell counts	ARL13B+dot		Ciliated	cell counts	ARL13B+dot		Ciliated	cell counts	ARL13B+dot
KAN672-1	53	60		KAN672-2	56	62		KAN672-3	0	64		KAN672-4	11	81		KAN672-5	76	86
2	54	67		2	56	69		2				2	3	75		2	50	59
3	49	65		3	72	88		3				3	6	76		3	55	64
4	60	77		4	79	94		4				4	2	68		4	36	42
5				5				5				5				5
6				6				6				6				6
7				7				7				7				7
8				8				8				8				8
9				9				9				9				9
10				10				10				10				10
	216	269	0		263	313	0		0	64	0		22	300	0		217	251	0
	sgGFP (pMCB306)	80.2974			LRRC45 KO	84.0256			FOP KO	0			sgIFT52	7.33333			sgSafe	86.4542
Analysis
24 hour s.s.	sgGFP (pMCB306)	LRRC45 KO	FOP KO	sgIFT52	sgSafe
KAN647_1-5	83.1325	77.1654	0	1.34529	84.1346
KAN647_11-15	81.0573	88.5246	0	3.64583	86.3454
KAN672_1-5	80.2974	84.0256	0	7.33333	86.4542

## Sheet: IF condition
Exp. number	Cell line	Culture condition	Fixation condition	rabbit-Alexa488	mouse IgG1-Alexa568	mouse IgG2b-Alexa647	Nuclear stain	Date	Replicate
Replicate 1
KAN647-1	RPE-BFP-Cas9 pMCB306 (pool)	serum starved for 24 hours	fixed in 4% PFA at RT for 15 mintues	ARL13B, Proteintech, 17711-1-AP, 1:2000	CEP170, Invitrogen, 41-3200, 1:1000	Ac-Tub, 6B-11, Santa Cruz, 1:1000	DAPI	2021-05-10	No.1
KAN647-2	RPE-BFP-Cas9 LRRC45 KO (pool)	serum starved for 24 hours	fixed in 4% PFA at RT for 15 mintues	ARL13B, Proteintech, 17711-1-AP, 1:2000	CEP170, Invitrogen, 41-3200, 1:1000	Ac-Tub, 6B-11, Santa Cruz, 1:1000	DAPI	2021-05-10	No.1
KAN647-3	RPE-BFP-Cas9 FOP KO (pool)	serum starved for 24 hours	fixed in 4% PFA at RT for 15 mintues	ARL13B, Proteintech, 17711-1-AP, 1:2000	CEP170, Invitrogen, 41-3200, 1:1000	Ac-Tub, 6B-11, Santa Cruz, 1:1000	DAPI	2021-05-10	No.1
KAN647-4	RPE-BFP-Cas9 sgIFT52#1	serum starved for 24 hours	fixed in 4% PFA at RT for 15 mintues	ARL13B, Proteintech, 17711-1-AP, 1:2000	CEP170, Invitrogen, 41-3200, 1:1000	Ac-Tub, 6B-11, Santa Cruz, 1:1000	DAPI	2021-05-10	No.1
KAN647-5	RPE-BFP-Cas9 sgSafe (pool)	serum starved for 24 hours	fixed in 4% PFA at RT for 15 mintues	ARL13B, Proteintech, 17711-1-AP, 1:2000	CEP170, Invitrogen, 41-3200, 1:1000	Ac-Tub, 6B-11, Santa Cruz, 1:1000	DAPI	2021-05-10	No.1
Replicate 2
KAN647-11	RPE-BFP-Cas9 pMCB306 (pool)	serum starved for 24 hours	fixed in 4% PFA at RT for 15 mintues	ARL13B, Proteintech, 17711-1-AP, 1:2000	CEP170, Invitrogen, 41-3200, 1:1000	Ac-Tub, 6B-11, Santa Cruz, 1:1000	DAPI	2021-05-10	No.2
KAN647-12	RPE-BFP-Cas9 LRRC45 KO (pool)	serum starved for 24 hours	fixed in 4% PFA at RT for 15 mintues	ARL13B, Proteintech, 17711-1-AP, 1:2000	CEP170, Invitrogen, 41-3200, 1:1000	Ac-Tub, 6B-11, Santa Cruz, 1:1000	DAPI	2021-05-10	No.2
KAN647-13	RPE-BFP-Cas9 FOP KO (pool)	serum starved for 24 hours	fixed in 4% PFA at RT for 15 mintues	ARL13B, Proteintech, 17711-1-AP, 1:2000	CEP170, Invitrogen, 41-3200, 1:1000	Ac-Tub, 6B-11, Santa Cruz, 1:1000	DAPI	2021-05-10	No.2
KAN647-14	RPE-BFP-Cas9 sgIFT52#1	serum starved for 24 hours	fixed in 4% PFA at RT for 15 mintues	ARL13B, Proteintech, 17711-1-AP, 1:2000	CEP170, Invitrogen, 41-3200, 1:1000	Ac-Tub, 6B-11, Santa Cruz, 1:1000	DAPI	2021-05-10	No.2
KAN647-15	RPE-BFP-Cas9 sgSafe (pool)	serum starved for 24 hours	fixed in 4% PFA at RT for 15 mintues	ARL13B, Proteintech, 17711-1-AP, 1:2000	CEP170, Invitrogen, 41-3200, 1:1000	Ac-Tub, 6B-11, Santa Cruz, 1:1000	DAPI	2021-05-10	No.2
Replicate 3
KAN672-1	RPE-BFP-Cas9 pMCB306 (pool)	serum starved for 24 hours	fixed in 4% PFA at RT for 15 mintues	ARL13B, Proteintech, 17711-1-AP, 1:2000	CEP170, Invitrogen, 41-3200, 1:1000	Ac-Tub, 6B-11, Santa Cruz, 1:1000	DAPI	2021-05-21	No.4
KAN672-2	RPE-BFP-Cas9 LRRC45 KO (pool)	serum starved for 24 hours	fixed in 4% PFA at RT for 15 mintues	ARL13B, Proteintech, 17711-1-AP, 1:2000	CEP170, Invitrogen, 41-3200, 1:1000	Ac-Tub, 6B-11, Santa Cruz, 1:1000	DAPI	2021-05-21	No.4
KAN672-3	RPE-BFP-Cas9 FOP KO (pool)	serum starved for 24 hours	fixed in 4% PFA at RT for 15 mintues	ARL13B, Proteintech, 17711-1-AP, 1:2000	CEP170, Invitrogen, 41-3200, 1:1000	Ac-Tub, 6B-11, Santa Cruz, 1:1000	DAPI	2021-05-21	No.4
KAN672-4	RPE-BFP-Cas9 sgIFT52#1	serum starved for 24 hours	fixed in 4% PFA at RT for 15 mintues	ARL13B, Proteintech, 17711-1-AP, 1:2000	CEP170, Invitrogen, 41-3200, 1:1000	Ac-Tub, 6B-11, Santa Cruz, 1:1000	DAPI	2021-05-21	No.4
KAN672-5	RPE-BFP-Cas9 sgSafe (pool)	serum starved for 24 hours	fixed in 4% PFA at RT for 15 mintues	ARL13B, Proteintech, 17711-1-AP, 1:2000	CEP170, Invitrogen, 41-3200, 1:1000	Ac-Tub, 6B-11, Santa Cruz, 1:1000	DAPI	2021-05-21	No.4

## Sheet: Statistics
Table Analyzed	Ciliation assay_FOP KO_sgIFT52		Table Analyzed	Ciliation assay_FOP KO_sgIFT52
Column B	FOP KO		Column C	sgIFT52
vs.	vs.		vs.	vs.
Column A	pMCB306		Column A	pMCB306
Unpaired t test with Welch's correction			Unpaired t test with Welch's correction
P value	0.0001		P value	<0.0001
P value summary	***		P value summary	****
Significantly different (P < 0.05)?	Yes		Significantly different (P < 0.05)?	Yes
One- or two-tailed P value?	Two-tailed		One- or two-tailed P value?	Two-tailed
Welch-corrected t, df	t=96.18, df=2.000		Welch-corrected t, df	t=39.91, df=2.894
How big is the difference?			How big is the difference?
Mean of column A	81.5		Mean of column A	81.5
Mean of column B	0		Mean of column C	4.108
Difference between means (B - A) ± SEM	-81.50 ± 0.8473		Difference between means (C - A) ± SEM	-77.39 ± 1.939
95% confidence interval	-85.14 to -77.85		95% confidence interval	-83.69 to -71.09
R squared (eta squared)	0.9998		R squared (eta squared)	0.9982
F test to compare variances			F test to compare variances
F, DFn, Dfd	Infinity, 2, 2		F, DFn, Dfd	4.237, 2, 2
P value	<0.0001		P value	0.3819
P value summary	****		P value summary	ns
Significantly different (P < 0.05)?	Yes		Significantly different (P < 0.05)?	No
Data analyzed			Data analyzed
Sample size, column A	3		Sample size, column A	3
Sample size, column B	3		Sample size, column C	3
