# Supplementary material for: A hierarchical pathway for assembly of the distal appendages that organize primary cilia
Source: eLife journal article supplement (doi:10.7554/elife.85999), 2025-01-30
Supplement: supp [file Figure 4-figure supplement 2-Source Data 4.xlsx]

## Sheet: Raw data
	Label	Area	Mean	Min	Max	X	Y	Circ	IntDen	RawIntDen	AR	Round	Solidity
		RPE-BFP-Cas9 no infection
197	IFT81_KAN310-9_1.tif:0001-0061	1.027	57.204	0	208	35.644	6.27	0.943	58.761	5606	1.195	0.837	0.956
198	IFT81_KAN310-9_1.tif:0002-0074	1.226	25.932	0	135	22.6	7.554	0.716	31.802	3034	2.077	0.481	0.911
199	IFT81_KAN310-9_1.tif:0003-0117	1.31	10.904	0	75	20.882	11.994	0.695	14.287	1363	1.903	0.525	0.853
200	IFT81_KAN310-9_1.tif:0004-0131	0.839	18.637	0	112	17.241	13.431	0.973	15.628	1491	1.125	0.889	0.952
201	IFT81_KAN310-9_1.tif:0005-0164	1.384	6.455	0	91	34.493	16.79	0.771	8.931	852	1.555	0.643	0.889
202	IFT81_KAN310-9_1.tif:0006-0174	1.237	154.534	0	893	60.332	17.821	0.948	191.137	18235	1.153	0.867	0.959
203	IFT81_KAN310-9_1.tif:0007-0204	1.195	94.412	0	597	78.222	20.94	0.904	112.816	10763	1.33	0.752	0.923
204	IFT81_KAN310-9_1.tif:0008-0230	1.226	89.573	0	393	91.673	23.559	0.94	109.85	10480	1.104	0.906	0.947
205	IFT81_KAN310-9_1.tif:0009-0350	1.75	148.91	0	1310	21.772	35.812	0.866	260.663	24868	1.439	0.695	0.933
206	IFT81_KAN310-9_1.tif:0010-0365	0.88	23.202	0	81	127.721	37.423	0.937	20.429	1949	1.401	0.714	0.949
207	IFT81_KAN310-9_1.tif:0011-0510	1.75	113.838	0	841	56.424	52.286	0.909	199.271	19011	1.097	0.911	0.918
208	IFT81_KAN310-9_1.tif:0012-0597	1.782	166.624	0	1097	88.955	61.191	0.842	296.909	28326	1.143	0.875	0.907
209	IFT81_KAN310-9_1.tif:0013-0647	1.006	100.938	0	640	107.853	66.249	0.954	101.569	9690	1.115	0.897	0.946
210	IFT81_KAN310-9_1.tif:0014-0663	0.954	119.088	0	734	67.722	67.856	0.905	113.592	10837	1.417	0.706	0.929
211	IFT81_KAN310-9_1.tif:0015-0708	1.604	176.281	0	1077	28.233	72.533	0.894	282.706	26971	1.287	0.777	0.939
212	IFT81_KAN310-9_1.tif:0016-0792	1.426	125.676	0	939	75.687	81.081	0.891	179.156	17092	1.22	0.82	0.925
213	IFT81_KAN310-9_1.tif:0017-0810	0.975	116.892	0	612	124.526	82.952	0.924	113.948	10871	1.141	0.877	0.935
214	IFT81_KAN310-9_1.tif:0018-0862	1.352	54.147	0	593	98.964	88.26	0.761	73.216	6985	1.623	0.616	0.89
215	IFT81_KAN310-9_1.tif:0019-0865	0.964	32.967	0	142	75.203	88.523	0.978	31.791	3033	1.246	0.803	0.948
216	IFT81_KAN310-9_1.tif:0020-0916	1.09	87	0	312	74.619	93.832	0.939	94.84	9048	1.116	0.896	0.977
217	IFT81_KAN310-9_1.tif:0021-0966	1.289	47.049	0	183	43.041	98.906	0.86	60.659	5787	1.605	0.623	0.918
218	IFT81_KAN310-9_1.tif:0022-1027	0.943	137.444	0	529	51.813	105.183	0.925	129.661	12370	1.319	0.758	0.923
219	IFT81_KAN310-9_2.tif:0001-0090	1.384	170.212	0	1139	36.958	9.207	0.961	235.506	22468	1.033	0.968	0.967
220	IFT81_KAN310-9_2.tif:0002-0123	1.499	77.084	0	457	98.187	12.657	0.844	115.542	11023	1.448	0.69	0.953
221	IFT81_KAN310-9_2.tif:0003-0193	1.174	58.33	0	344	136.355	19.76	0.938	68.478	6533	1.221	0.819	0.97
222	IFT81_KAN310-9_2.tif:0004-0273	1.279	82.484	0	655	96.732	27.992	0.924	105.479	10063	1.122	0.891	0.964
223	IFT81_KAN310-9_2.tif:0005-0290	1.74	161.807	0	1241	70.539	29.723	0.861	281.543	26860	1.501	0.666	0.935
224	IFT81_KAN310-9_2.tif:0006-0351	1.373	68.305	0	511	61.786	35.931	0.868	93.792	8948	1.34	0.746	0.942
225	IFT81_KAN310-9_2.tif:0007-0413	1.53	100.548	0	710	124	42.302	0.907	153.874	14680	1.272	0.786	0.948
226	IFT81_KAN310-9_2.tif:0008-0457	1.688	146.621	0	1153	97.319	46.785	0.877	247.435	23606	1.575	0.635	0.925
227	IFT81_KAN310-9_2.tif:0009-0493	1.74	124.343	0	1000	76.855	50.512	0.936	216.356	20641	1.164	0.859	0.941
228	IFT81_KAN310-9_2.tif:0010-0552	1.059	30.772	0	139	102.332	56.584	0.695	32.578	3108	1.905	0.525	0.849
229	IFT81_KAN310-9_2.tif:0011-0565	1.331	105.614	0	477	44.071	57.884	0.924	140.593	13413	1.225	0.817	0.955
230	IFT81_KAN310-9_2.tif:0012-0650	1.95	187.591	0	1513	20.347	66.57	0.912	365.733	34892	1.018	0.983	0.937
231	IFT81_KAN310-9_2.tif:0013-0709	1.426	123.816	0	684	41.163	72.633	0.926	176.504	16839	1.261	0.793	0.948
232	IFT81_KAN310-9_2.tif:0014-0767	1.3	105.927	0	310	65.362	78.555	0.928	137.679	13135	1.239	0.807	0.947
233	IFT81_KAN310-9_2.tif:0015-0890	1.289	34.829	0	183	76.38	91.22	0.651	44.904	4284	2.287	0.437	0.863
234	IFT81_KAN310-9_2.tif:0016-0909	1.583	112.007	0	854	99.219	93.063	0.882	177.28	16913	1.07	0.935	0.924
235	IFT81_KAN310-9_2.tif:0017-0946	1.143	59.239	0	294	139.694	96.888	0.865	67.681	6457	1.634	0.612	0.908
236	IFT81_KAN310-9_2.tif:0018-0958	1.509	167.618	0	1114	73.617	98.037	0.943	253.001	24137	1.199	0.834	0.954
237	IFT81_KAN310-9_2.tif:0019-0970	1.646	138.446	0	1140	38.105	99.354	0.917	227.834	21736	1.269	0.788	0.949
238	IFT81_KAN310-9_3.tif:0001-0112	1.017	59.701	0	340	77.847	11.448	0.904	60.7	5791	1.366	0.732	0.951
239	IFT81_KAN310-9_3.tif:0002-0151	1.646	167.752	0	1053	35.703	15.504	0.931	276.061	26337	1.176	0.851	0.926
240	IFT81_KAN310-9_3.tif:0003-0206	0.933	85.719	0	386	8.864	21.135	0.927	79.966	7629	1.363	0.734	0.957
241	IFT81_KAN310-9_3.tif:0004-0251	1.75	133.168	0	985	43.765	25.676	0.919	233.106	22239	1.064	0.94	0.952
242	IFT81_KAN310-9_3.tif:0005-0272	1.457	104.763	0	693	103.085	27.879	0.935	152.637	14562	1.159	0.863	0.933
243	IFT81_KAN310-9_3.tif:0006-0338	1.73	177.103	0	1466	80.291	34.575	0.908	306.301	29222	1.412	0.708	0.954
244	IFT81_KAN310-9_3.tif:0007-0353	1.153	74.164	0	410	17.651	36.167	0.883	85.511	8158	1.289	0.776	0.94
245	IFT81_KAN310-9_3.tif:0008-0377	1.499	88.462	0	579	52.369	38.561	0.912	132.596	12650	1.265	0.791	0.953
246	IFT81_KAN310-9_3.tif:0009-0454	1.415	86.459	0	869	102.353	46.534	0.809	122.344	11672	1.427	0.701	0.888
247	IFT81_KAN310-9_3.tif:0010-0490	1.52	192.641	0	1284	68.561	50.173	0.935	292.79	27933	1.097	0.911	0.967
248	IFT81_KAN310-9_3.tif:0011-0571	1.95	104.78	0	707	24.68	58.458	0.844	204.281	19489	1.67	0.599	0.925
249	IFT81_KAN310-9_3.tif:0012-0690	1.572	129.887	0	804	3.242	70.602	0.922	204.218	19483	1.312	0.762	0.943
250	IFT81_KAN310-9_3.tif:0013-0726	1.268	145.769	0	740	95.056	74.348	0.944	184.879	17638	1.108	0.903	0.964
251	IFT81_KAN310-9_3.tif:0014-0761	1.3	189.984	0	918	16.763	77.927	0.984	246.932	23558	1.011	0.989	0.95
252	IFT81_KAN310-9_3.tif:0015-0818	1.688	183.621	0	1705	74.782	83.776	0.917	309.875	29563	1.3	0.769	0.958
253	IFT81_KAN310-9_3.tif:0016-0830	1.918	176.699	0	1506	32.601	84.993	0.918	338.941	32336	1.138	0.879	0.936
254	IFT81_KAN310-9_3.tif:0017-0842	1.352	117.147	0	641	86.996	86.219	0.913	158.402	15112	1.162	0.86	0.956
255	IFT81_KAN310-9_3.tif:0018-0873	1.583	154.464	0	1318	58.123	89.358	0.882	244.479	23324	1.474	0.679	0.941
256	IFT81_KAN310-9_3.tif:0019-0881	0.912	33.264	0	104	104.542	90.275	0.938	30.335	2894	1.252	0.799	0.956
257	IFT81_KAN310-9_3.tif:0020-0973	1.258	100.233	0	816	50.995	99.605	0.849	126.076	12028	1.401	0.714	0.934
258	IFT81_KAN310-9_3.tif:0021-0998	0.922	24.091	0	232	129.539	102.179	0.982	22.222	2120	1.147	0.872	0.962
259	IFT81_KAN310-9_3.tif:0022-1032	0.933	131.461	0	575	102.708	105.685	0.927	122.638	11700	1.015	0.985	0.957
										15448.2
		RPE-BFP-Cas9 sgIFT52
1	IFT81_KAN310-10_1.tif:0001-0100	0.964	6.543	0	54	125.594	10.221	0.885	6.31	602	1.544	0.647	0.934
2	IFT81_KAN310-10_1.tif:0002-0104	1.478	24.05	0	164	98.386	10.715	0.815	35.544	3391	1.714	0.583	0.91
3	IFT81_KAN310-10_1.tif:0003-0190	1.132	38.481	0	141	35.847	19.479	0.962	43.563	4156	1.185	0.844	0.964
4	IFT81_KAN310-10_1.tif:0004-0270	1.625	37.581	0	186	84.166	27.614	0.919	61.057	5825	1.323	0.756	0.928
5	IFT81_KAN310-10_1.tif:0005-0270	1.321	37.087	0	145	70.653	27.709	0.943	48.982	4673	1.183	0.846	0.951
6	IFT81_KAN310-10_1.tif:0006-0418	1.268	25.579	0	132	14.274	42.847	0.906	32.441	3095	1.188	0.842	0.927
7	IFT81_KAN310-10_1.tif:0007-0470	1.53	36.027	0	228	40.568	48.169	0.956	55.135	5260	1.05	0.952	0.945
8	IFT81_KAN310-10_1.tif:0008-0523	0.975	19.269	0	105	6.268	53.605	0.895	18.783	1792	1.42	0.704	0.949
9	IFT81_KAN310-10_1.tif:0009-0578	1.331	55.386	0	185	89.581	59.183	0.951	73.729	7034	1.019	0.982	0.951
10	IFT81_KAN310-10_1.tif:0010-0712	1.258	24.767	0	162	62.905	72.902	0.936	31.152	2972	1.128	0.886	0.96
11	IFT81_KAN310-10_1.tif:0011-0715	1.247	18.059	0	100	115.865	73.255	0.944	22.526	2149	1.209	0.827	0.941
12	IFT81_KAN310-10_1.tif:0012-0723	1.331	36.756	0	176	12.443	74.036	0.924	48.929	4668	1.185	0.844	0.955
13	IFT81_KAN310-10_1.tif:0013-0733	1.551	49.162	0	235	49.139	75.067	0.91	76.266	7276	1.258	0.795	0.928
14	IFT81_KAN310-10_1.tif:0014-0745	1.509	38.764	0	192	82.867	76.329	0.863	58.51	5582	1.358	0.736	0.917
15	IFT81_KAN310-10_1.tif:0015-0758	1.258	12.317	0	94	135.944	77.673	0.936	15.492	1478	1.116	0.896	0.956
16	IFT81_KAN310-10_1.tif:0016-0866	0.901	30.733	0	175	70.662	88.702	0.752	27.704	2643	2.198	0.455	0.95
17	IFT81_KAN310-10_1.tif:0017-0973	1.604	36.17	0	171	10.748	99.634	0.931	58.007	5534	1.3	0.769	0.927
18	IFT81_KAN310-10_1.tif:0018-1008	1.352	23.721	0	142	62.685	103.235	0.902	32.074	3060	1.403	0.713	0.938
19	IFT81_KAN310-10_2.tif:0001-0058	1.048	19.84	0	101	102.072	5.997	0.932	20.796	1984	1.172	0.853	0.957
20	IFT81_KAN310-10_2.tif:0002-0094	1.289	32.114	0	125	91.717	9.637	0.921	41.403	3950	1.089	0.918	0.939
21	IFT81_KAN310-10_2.tif:0003-0196	0.943	18.533	0	106	108.153	20.099	0.938	17.484	1668	1.232	0.812	0.957
22	IFT81_KAN310-10_2.tif:0004-0221	1.446	39.036	0	134	45.296	22.657	0.939	56.466	5387	1.173	0.853	0.958
23	IFT81_KAN310-10_2.tif:0005-0256	0.996	52.095	0	289	37.169	26.256	0.72	51.875	4949	2.354	0.425	0.909
24	IFT81_KAN310-10_2.tif:0006-0338	1.457	48.446	0	254	51.773	34.568	0.935	70.585	6734	1.189	0.841	0.933
25	IFT81_KAN310-10_2.tif:0007-0425	1.583	32.854	0	120	67.447	43.507	0.928	52.001	4961	1.362	0.734	0.947
26	IFT81_KAN310-10_2.tif:0008-0453	1.122	15.785	0	162	121.256	46.425	0.924	17.704	1689	1.055	0.948	0.947
27	IFT81_KAN310-10_2.tif:0009-0501	1.08	36.767	0	170	64.937	51.391	0.72	39.695	3787	1.743	0.574	0.834
28	IFT81_KAN310-10_2.tif:0010-0504	1.195	35.5	0	177	40.198	51.628	0.943	42.42	4047	1.103	0.906	0.938
29	IFT81_KAN310-10_2.tif:0011-0563	1.635	37.391	0	210	83.781	57.633	0.959	61.141	5833	1.276	0.784	0.954
30	IFT81_KAN310-10_2.tif:0012-0567	1.436	39.628	0	168	42.976	58.113	0.932	56.906	5429	1.128	0.886	0.955
31	IFT81_KAN310-10_2.tif:0013-0655	1.761	32.083	0	138	98.289	67.052	0.805	56.497	5390	1.787	0.56	0.913
32	IFT81_KAN310-10_2.tif:0014-0718	0.86	32.744	0	183	34.359	73.51	0.928	28.144	2685	1.381	0.724	0.965
33	IFT81_KAN310-10_2.tif:0015-0822	0.964	35.043	0	161	87.023	84.149	0.927	33.794	3224	1.043	0.959	0.958
34	IFT81_KAN310-10_2.tif:0016-0851	1.929	46.625	0	186	7.858	87.185	0.806	89.924	8579	1.842	0.543	0.951
35	IFT81_KAN310-10_2.tif:0017-0883	1.625	23.426	0	117	32.289	90.44	0.939	38.06	3631	1.082	0.924	0.969
36	IFT81_KAN310-10_2.tif:0018-0926	0.87	66.627	0	435	76.17	94.849	0.908	57.965	5530	1.215	0.823	0.965
37	IFT81_KAN310-10_2.tif:0019-0974	1.017	25.701	0	120	111.374	99.73	0.904	26.131	2493	1.124	0.889	0.946
38	IFT81_KAN310-10_2.tif:0020-0992	1.405	51.149	0	268	74.207	101.594	0.937	71.843	6854	1.114	0.898	0.94
39	IFT81_KAN310-10_2.tif:0021-1023	1.53	38.479	0	211	49.724	104.727	0.931	58.887	5618	1.186	0.843	0.951
40	IFT81_KAN310-10_3.tif:0001-0117	1.038	44.192	0	172	67.003	12.035	0.882	45.858	4375	1.596	0.627	0.934
41	IFT81_KAN310-10_3.tif:0002-0200	1.363	36.977	0	149	89.826	20.518	0.909	50.386	4807	1.113	0.898	0.935
42	IFT81_KAN310-10_3.tif:0003-0225	0.996	18.263	0	70	23.013	23.011	0.976	18.186	1735	1.255	0.797	0.96
43	IFT81_KAN310-10_3.tif:0004-0288	1.426	43.265	0	180	85.551	29.446	0.926	61.675	5884	1.201	0.833	0.951
44	IFT81_KAN310-10_3.tif:0005-0296	1.436	32.993	0	143	27.855	30.413	0.932	47.378	4520	1.058	0.945	0.948
45	IFT81_KAN310-10_3.tif:0006-0358	1.342	26.906	0	163	53.035	36.688	0.921	36.1	3444	1.412	0.708	0.952
46	IFT81_KAN310-10_3.tif:0007-0420	1.163	54.387	0	209	21.081	43	0.947	63.279	6037	1.101	0.908	0.949
47	IFT81_KAN310-10_3.tif:0008-0427	1.384	41.432	0	176	82.049	43.745	0.923	57.325	5469	1.09	0.918	0.943
48	IFT81_KAN310-10_3.tif:0009-0526	1.153	41.136	0	175	63.574	53.9	0.883	47.43	4525	1.255	0.797	0.924
49	IFT81_KAN310-10_3.tif:0010-0535	1.174	21.438	0	119	106.124	54.845	0.967	25.167	2401	1.022	0.978	0.966
50	IFT81_KAN310-10_3.tif:0011-0637	1.625	56.284	0	338	45.839	65.27	0.896	91.444	8724	1.152	0.868	0.92
51	IFT81_KAN310-10_3.tif:0012-0649	1.289	59.724	0	336	75.64	66.481	0.921	77	7346	1.176	0.85	0.946
52	IFT81_KAN310-10_3.tif:0013-0671	1.174	21.268	0	152	19.297	68.701	0.927	24.968	2382	1.31	0.763	0.949
53	IFT81_KAN310-10_3.tif:0014-0724	1.352	35.085	0	164	9.593	74.181	0.966	47.441	4526	1.214	0.824	0.966
54	IFT81_KAN310-10_3.tif:0015-0758	1.499	29.49	0	133	89.173	77.61	0.962	44.202	4217	1.207	0.828	0.947
55	IFT81_KAN310-10_3.tif:0016-0762	1.174	31.938	0	140	78.699	78.011	0.696	37.494	3577	2.333	0.429	0.855
56	IFT81_KAN310-10_3.tif:0017-0841	1.415	30.681	0	157	61.851	86.179	0.919	43.416	4142	1.256	0.796	0.951
57	IFT81_KAN310-10_3.tif:0018-0876	0.922	10.989	0	58	107.493	89.71	0.982	10.136	967	1.005	0.995	0.946
58	IFT81_KAN310-10_3.tif:0019-0992	1.143	11.982	0	43	116.858	101.614	0.971	13.689	1306	1.037	0.964	0.96
59	IFT81_KAN310-10_3.tif:0020-1032	0.943	44.444	0	141	16.596	105.659	0.907	41.927	4000	1.231	0.812	0.957
										4237.22

## Sheet: IF condition
Exp. number	Cell line	Culture condition	Fixation condition	rabbit-Alexa488	mouse IgG1-Alexa568	mouse IgG2b-Alexa647	Nuclear stain	Date	Replicate
KAN310-9	RPE-BFP-Cas9		Fixed with 4% PFA/serum starvation for 24 hours	IFT81, 11744-1-AP, Proteintech, 1:500	CEP170, Invitrogen, 41-3200, 1:1000	Ac-Tub, 6B-11, SIGMA, 1:2000	DAPI
KAN310-10	RPE-BFP-Cas9 sgIFT52#1 (post-Cre)		Fixed with 4% PFA/serum starvation for 24 hours	IFT81, 11744-1-AP, Proteintech, 1:500	CEP170, Invitrogen, 41-3200, 1:1000	Ac-Tub, 6B-11, SIGMA, 1:2000	DAPI
