# Supplementary material for: A hierarchical pathway for assembly of the distal appendages that organize primary cilia
Source: eLife journal article supplement (doi:10.7554/elife.85999), 2025-01-30
Supplement: supp [file Figure 4-figure supplement 2-Source Data 5.xlsx]

## Sheet: Raw data
	Label	Area	Mean	Min	Max	X	Y	Circ	IntDen	RawIntDen	AR	Round	Solidity
	RPE-BFP-Cas9 none
111	TRAF3IP1_KAN310-24_1.tif:0001-0079	1.08	69.427	0	299	26.759	8.132	1	74.956	7151	1.032	0.969	0.945	0.684543
112	TRAF3IP1_KAN310-24_1.tif:0002-0223	1.268	122.876	0	623	108.583	22.871	0.96	155.844	14868	1.187	0.843	0.938	1.42327
113	TRAF3IP1_KAN310-24_1.tif:0003-0234	1.478	75.965	0	394	53.421	24.027	0.876	112.271	10711	1.557	0.642	0.953	1.02533
114	TRAF3IP1_KAN310-24_1.tif:0004-0310	0.933	23.067	0	290	76.205	31.785	0.927	21.519	2053	1.324	0.755	0.962	0.196527
115	TRAF3IP1_KAN310-24_1.tif:0005-0364	1.321	85.238	0	429	12.115	37.31	0.943	112.575	10740	1.205	0.83	0.955	1.02811
116	TRAF3IP1_KAN310-24_1.tif:0006-0501	1.237	68.89	0	454	109.744	51.326	0.92	85.207	8129	1.232	0.812	0.967	0.778164
117	TRAF3IP1_KAN310-24_1.tif:0007-0606	1.415	63.467	0	604	43.112	62.082	0.848	89.809	8568	1.563	0.64	0.951	0.820188
118	TRAF3IP1_KAN310-24_1.tif:0008-0644	1.572	156.867	0	1100	69.713	66.027	0.876	246.638	23530	1.36	0.735	0.932	2.25245
119	TRAF3IP1_KAN310-24_1.tif:0009-0746	1.509	72.632	0	622	71.674	76.414	0.919	109.63	10459	1.217	0.821	0.957	1.00121
120	TRAF3IP1_KAN310-24_1.tif:0010-0797	1.143	67.771	0	294	32.111	81.625	0.971	77.429	7387	1.032	0.969	0.965	0.707134
121	TRAF3IP1_KAN310-24_1.tif:0011-0930	1.3	62.952	0	306	31.186	95.205	0.917	81.821	7806	1.39	0.719	0.929	0.747244
122	TRAF3IP1_KAN310-24_2.tif:0001-0015	0.901	38.581	0	173	124.295	1.533	0.96	34.779	3318	1.009	0.991	0.94	0.317622
123	TRAF3IP1_KAN310-24_2.tif:0002-0189	1.824	140.713	0	844	64.972	19.354	0.762	256.638	24484	1.677	0.596	0.921	2.34378
124	TRAF3IP1_KAN310-24_2.tif:0003-0195	0.86	33.402	0	234	110.006	20.029	0.915	28.71	2739	1.314	0.761	0.921	0.262196
125	TRAF3IP1_KAN310-24_2.tif:0004-0335	1.53	106.534	0	850	70.34	34.316	0.832	163.035	15554	1.449	0.69	0.924	1.48894
126	TRAF3IP1_KAN310-24_2.tif:0005-0367	1.467	122.464	0	671	69.5	37.497	0.759	179.711	17145	1.817	0.55	0.918	1.64124
127	TRAF3IP1_KAN310-24_2.tif:0006-0394	1.195	22.412	0	90	111.397	40.409	0.889	26.781	2555	1.338	0.747	0.942	0.244582
128	TRAF3IP1_KAN310-24_2.tif:0007-0444	1.562	83.275	0	796	9.351	45.517	0.849	130.059	12408	1.545	0.647	0.925	1.18778
129	TRAF3IP1_KAN310-24_2.tif:0008-0538	0.839	112.612	0	710	86.15	55.171	0.862	94.431	9009	1.366	0.732	0.904	0.862403
130	TRAF3IP1_KAN310-24_2.tif:0009-0569	1.583	122.868	0	1047	56.611	58.368	0.86	194.47	18553	1.261	0.793	0.938	1.77602
131	TRAF3IP1_KAN310-24_2.tif:0010-0634	1.038	60.02	0	332	110.826	64.873	0.922	62.283	5942	1.133	0.882	0.961	0.568809
132	TRAF3IP1_KAN310-24_2.tif:0011-0700	0.849	22.531	0	144	39.095	71.742	0.985	19.129	1825	1.121	0.892	0.959	0.174702
133	TRAF3IP1_KAN310-24_2.tif:0012-0712	1.405	73.56	0	439	22.624	72.93	0.912	103.32	9857	1.295	0.772	0.944	0.94358
134	TRAF3IP1_KAN310-24_2.tif:0013-0765	1.488	53.908	0	522	120.698	78.352	0.971	80.239	7655	1.167	0.857	0.934	0.732789
135	TRAF3IP1_KAN310-24_2.tif:0014-0837	1.478	129.695	0	931	96.057	85.743	0.854	191.682	18287	1.392	0.718	0.934	1.75056
136	TRAF3IP1_KAN310-24_2.tif:0015-0940	1.331	37.575	0	376	67.359	96.204	0.899	50.019	4772	1.153	0.867	0.955	0.456809
137	TRAF3IP1_KAN310-24_2.tif:0016-0976	0.88	44.167	0	186	47.499	99.965	0.937	38.888	3710	1.008	0.992	0.923	0.355147
138	TRAF3IP1_KAN310-24_3.tif:0001-0058	1.048	78.74	0	574	106.674	5.911	0.903	82.534	7874	1.169	0.855	0.966	0.753753
139	TRAF3IP1_KAN310-24_3.tif:0002-0130	0.86	102.049	0	426	20.432	13.369	0.915	87.712	8368	1.472	0.679	0.927	0.801043
140	TRAF3IP1_KAN310-24_3.tif:0003-0172	1.688	100.969	0	518	76.038	17.634	0.931	170.393	16256	1.176	0.85	0.933	1.55614
141	TRAF3IP1_KAN310-24_3.tif:0004-0252	1.279	65.156	0	432	64.879	25.838	0.913	83.32	7949	1.223	0.817	0.938	0.760933
142	TRAF3IP1_KAN310-24_3.tif:0005-0412	0.996	57.421	0	202	104.387	42.194	0.976	57.179	5455	1.184	0.844	0.945	0.52219
143	TRAF3IP1_KAN310-24_3.tif:0006-0445	1.321	87.944	0	324	51.798	45.546	1	116.149	11081	1.008	0.992	0.955	1.06075
144	TRAF3IP1_KAN310-24_3.tif:0007-0456	0.933	102.865	0	464	19.722	46.708	0.993	95.961	9155	1.046	0.956	0.962	0.87638
145	TRAF3IP1_KAN310-24_3.tif:0008-0573	1.331	75.583	0	738	79.345	58.649	0.899	100.615	9599	1.108	0.903	0.944	0.918882
146	TRAF3IP1_KAN310-24_3.tif:0009-0606	1.101	130.829	0	462	16.323	62.063	0.997	143.989	13737	1.042	0.959	0.955	1.315
147	TRAF3IP1_KAN310-24_3.tif:0010-0635	1.509	137.59	0	893	63.857	65.068	0.943	207.677	19813	1.041	0.961	0.938	1.89664
148	TRAF3IP1_KAN310-24_3.tif:0011-0653	1.027	84.898	0	431	28.778	66.889	0.974	87.209	8320	1.111	0.9	0.951	0.796448
149	TRAF3IP1_KAN310-24_3.tif:0012-0726	0.964	54.174	0	353	113.863	74.327	0.959	52.242	4984	1.016	0.984	0.963	0.477103
150	TRAF3IP1_KAN310-24_3.tif:0013-0780	1.111	80.585	0	319	13.276	79.842	0.975	89.536	8542	1.197	0.835	0.955	0.817699
151	TRAF3IP1_KAN310-24_3.tif:0014-0784	1.604	162	0	1438	30.994	80.257	0.894	259.803	24786	1.3	0.769	0.93	2.37269
152	TRAF3IP1_KAN310-24_3.tif:0015-0813	1.53	128.774	0	608	78.604	83.231	0.956	197.069	18801	1.173	0.853	0.951	1.79976
153	TRAF3IP1_KAN310-24_3.tif:0016-0910	1.069	110.49	0	563	105.005	93.16	0.87	118.131	11270	1.521	0.657	0.911	1.07884
154	TRAF3IP1_KAN310-24_3.tif:0017-0912	0.933	49.843	0	152	76.319	93.39	0.927	46.498	4436	1.242	0.805	0.957	0.424644
										10446.4				1
	RPE-BFP-Cas9 sgIFT52
155	TRAF3IP1_KAN310-25_1.tif:0001-0034	1.352	29.217	0	126	45.255	3.538	0.928	39.506	3769	1.3	0.769	0.938	0.360795
156	TRAF3IP1_KAN310-25_1.tif:0002-0043	0.964	54.652	0	555	130.486	4.471	0.873	52.703	5028	1.329	0.752	0.893	0.481315
157	TRAF3IP1_KAN310-25_1.tif:0003-0088	1.352	22.395	0	121	112.628	8.996	0.928	30.282	2889	1.136	0.88	0.942	0.276555
158	TRAF3IP1_KAN310-25_1.tif:0004-0141	1.426	17.132	0	70	80.11	14.476	0.967	24.423	2330	1.145	0.874	0.941	0.223044
159	TRAF3IP1_KAN310-25_1.tif:0005-0273	1.31	26.68	0	116	28.525	27.923	0.895	34.957	3335	1.11	0.901	0.977	0.319249
160	TRAF3IP1_KAN310-25_1.tif:0006-0277	1.006	42.719	0	203	70.841	28.444	0.954	42.986	4101	1.143	0.875	0.95	0.392576
161	TRAF3IP1_KAN310-25_1.tif:0007-0368	1.237	27.28	0	114	96.312	37.707	0.964	33.741	3219	1.174	0.852	0.933	0.308145
162	TRAF3IP1_KAN310-25_1.tif:0008-0428	1.027	22.184	0	75	128.129	43.789	0.913	22.788	2174	1.347	0.742	0.961	0.20811
163	TRAF3IP1_KAN310-25_1.tif:0009-0488	1.027	30.01	0	168	2.748	50.018	0.943	30.827	2941	1.137	0.879	0.951	0.281533
164	TRAF3IP1_KAN310-25_1.tif:0010-0515	0.985	28.723	0	182	104.138	52.745	0.947	28.301	2700	1.037	0.964	0.974	0.258463
165	TRAF3IP1_KAN310-25_1.tif:0011-0572	1.247	33.202	0	186	21.102	58.616	0.928	41.414	3951	1.237	0.808	0.964	0.378217
166	TRAF3IP1_KAN310-25_1.tif:0012-0626	1.237	29.525	0	144	61.029	64.126	0.948	36.519	3484	1.123	0.891	0.959	0.333512
167	TRAF3IP1_KAN310-25_1.tif:0013-0690	1.541	45.81	0	201	49.9	70.683	0.928	70.585	6734	1.233	0.811	0.933	0.644625
168	TRAF3IP1_KAN310-25_1.tif:0014-0741	1.436	64.474	0	455	77.433	75.926	0.947	92.586	8833	1.089	0.918	0.938	0.845556
169	TRAF3IP1_KAN310-25_1.tif:0015-0813	1.226	42.214	0	174	105.206	83.268	0.886	51.77	4939	1.116	0.896	0.951	0.472795
170	TRAF3IP1_KAN310-25_1.tif:0016-0840	1.593	39.533	0	318	39.492	85.979	0.866	62.985	6009	1.517	0.659	0.941	0.575223
171	TRAF3IP1_KAN310-25_1.tif:0017-0892	1.132	127.037	0	774	100.765	91.408	0.842	143.811	13720	1.601	0.625	0.939	1.31337
172	TRAF3IP1_KAN310-25_1.tif:0018-0981	1.782	30.394	0	123	67.033	100.454	0.949	54.16	5167	1.248	0.801	0.937	0.494621
173	TRAF3IP1_KAN310-25_1.tif:0019-1016	0.954	35.857	0	115	38.797	104.005	0.981	34.202	3263	1.023	0.977	0.963	0.312357
174	TRAF3IP1_KAN310-25_2.tif:0001-0146	1.069	12.52	0	101	129.837	14.973	0.897	13.385	1277	1.222	0.818	0.903	0.122243
175	TRAF3IP1_KAN310-25_2.tif:0002-0273	1.446	44.5	0	234	96.829	27.992	0.939	64.369	6141	1.069	0.936	0.958	0.587859
176	TRAF3IP1_KAN310-25_2.tif:0003-0291	1.457	43.59	0	209	60.935	29.8	0.972	63.51	6059	1.13	0.885	0.959	0.580009
177	TRAF3IP1_KAN310-25_2.tif:0004-0330	1.09	44.221	0	237	49.51	33.74	0.736	48.206	4599	1.744	0.573	0.856	0.440248
178	TRAF3IP1_KAN310-25_2.tif:0005-0372	1.3	26.935	0	115	11.861	38.065	0.955	35.009	3340	1.098	0.91	0.936	0.319728
179	TRAF3IP1_KAN310-25_2.tif:0006-0408	1.405	47.933	0	175	98.131	41.833	0.888	67.325	6423	1.295	0.772	0.95	0.614854
180	TRAF3IP1_KAN310-25_2.tif:0007-0486	1.405	33.336	0	203	76.029	49.821	0.948	46.822	4467	1.187	0.843	0.978	0.427612
181	TRAF3IP1_KAN310-25_2.tif:0008-0508	1.342	15.922	0	77	123.497	51.982	0.958	21.362	2038	1.194	0.838	0.962	0.195091
182	TRAF3IP1_KAN310-25_2.tif:0009-0582	1.08	19.913	0	98	130.8	59.66	0.978	21.498	2051	1.116	0.896	0.932	0.196336
183	TRAF3IP1_KAN310-25_2.tif:0010-0628	1.509	49.493	0	209	57.198	64.327	0.943	74.704	7127	1.151	0.869	0.947	0.682245
184	TRAF3IP1_KAN310-25_2.tif:0011-0746	1.3	53.129	0	455	118.022	76.428	0.928	69.054	6588	1.022	0.979	0.95	0.630649
185	TRAF3IP1_KAN310-25_2.tif:0012-0788	1.352	46.116	0	249	40.57	80.688	0.928	62.357	5949	1.301	0.769	0.942	0.569479
186	TRAF3IP1_KAN310-25_2.tif:0013-0818	1.646	81.229	0	403	22.917	83.761	0.823	133.675	12753	1.502	0.666	0.929	1.2208
187	TRAF3IP1_KAN310-25_2.tif:0014-0862	1.384	27.598	0	188	85.581	88.309	0.888	38.185	3643	1.182	0.846	0.91	0.348733
188	TRAF3IP1_KAN310-25_2.tif:0015-0906	1.09	36.385	0	237	42.232	92.757	0.969	39.663	3784	1.117	0.895	0.972	0.362231
189	TRAF3IP1_KAN310-25_3.tif:0001-0089	1.3	22.702	0	118	59.113	9.188	0.955	29.506	2815	1.225	0.816	0.947	0.269471
190	TRAF3IP1_KAN310-25_3.tif:0002-0094	1.048	39.01	0	129	99.709	9.666	0.932	40.89	3901	1.136	0.88	0.957	0.373431
191	TRAF3IP1_KAN310-25_3.tif:0003-0229	1.184	27.805	0	188	29.172	23.473	0.964	32.934	3142	1.117	0.895	0.942	0.300774
192	TRAF3IP1_KAN310-25_3.tif:0004-0272	1.73	38.182	0	211	54.232	27.876	0.908	66.036	6300	1.204	0.83	0.943	0.603079
193	TRAF3IP1_KAN310-25_3.tif:0005-0328	1.163	27.387	0	203	85.916	33.594	0.93	31.865	3040	1.209	0.827	0.965	0.29101
194	TRAF3IP1_KAN310-25_3.tif:0006-0369	1.216	33.121	0	180	108.609	37.824	0.989	40.271	3842	1.11	0.901	0.955	0.367783
195	TRAF3IP1_KAN310-25_3.tif:0007-0432	1.457	64.957	0	344	39.737	44.311	0.896	94.641	9029	1.105	0.905	0.952	0.864318
196	TRAF3IP1_KAN310-25_3.tif:0008-0479	2.18	748.356	0	2727	90.329	49.072	0.965	1631.59	155658	1.087	0.92	0.956	14.9007
197	TRAF3IP1_KAN310-25_3.tif:0009-0520	1.352	28.271	0	167	114.923	53.305	0.966	38.227	3647	1.195	0.837	0.966	0.349116
198	TRAF3IP1_KAN310-25_3.tif:0010-0541	1.289	36.992	0	168	66.682	55.389	0.906	47.692	4550	1.141	0.877	0.969	0.435557
199	TRAF3IP1_KAN310-25_3.tif:0011-0652	1.195	25.763	0	138	108.743	66.854	0.972	30.785	2937	1.115	0.897	0.962	0.28115
200	TRAF3IP1_KAN310-25_3.tif:0012-0660	0.839	20.7	0	91	138.934	67.6	0.875	17.358	1656	1.131	0.884	0.941	0.158524
201	TRAF3IP1_KAN310-25_3.tif:0013-0692	1.499	73.839	0	298	35.852	70.834	0.937	110.678	10559	1.157	0.864	0.944	1.01078
202	TRAF3IP1_KAN310-25_3.tif:0014-0791	0.954	33.253	0	162	4.618	80.999	0.948	31.718	3026	1.109	0.902	0.958	0.28967
203	TRAF3IP1_KAN310-25_3.tif:0015-0806	1.237	43.432	0	126	49.087	82.532	0.92	53.72	5125	1.308	0.765	0.959	0.4906
204	TRAF3IP1_KAN310-25_3.tif:0016-0809	1.321	60.365	0	263	30.876	82.836	0.971	79.725	7606	1.01	0.991	0.955	0.728099
205	TRAF3IP1_KAN310-25_3.tif:0017-0876	0.901	19.698	0	76	134.019	89.668	0.96	17.756	1694	1.136	0.88	0.935	0.162161
										7712.78				0.738321

## Sheet: IF condition
Exp. number	Cell line	Culture condition	Fixation condition	rabbit-Alexa488	mouse IgG1-Alexa568	mouse IgG2b-Alexa647	Nuclear stain	Date	Replicate
KAN310-24	RPE-BFP-Cas9		Fixed with 4% PFA/serum starvation for 24 hours	TRAF3IP1 Antibody, 14404-1-AP, Proteintech, 1:500	CEP170, Invitrogen, 41-3200, 1:1000	Ac-Tub, 6B-11, SIGMA, 1:2000	DAPI
KAN310-25	RPE-BFP-Cas9 sgIFT52#1 (post-Cre)		Fixed with 4% PFA/serum starvation for 24 hours	TRAF3IP1 Antibody, 14404-1-AP, Proteintech, 1:500	CEP170, Invitrogen, 41-3200, 1:1000	Ac-Tub, 6B-11, SIGMA, 1:2000	DAPI
