# Supplementary material for: A hierarchical pathway for assembly of the distal appendages that organize primary cilia
Source: eLife journal article supplement (doi:10.7554/elife.85999), 2025-01-30
Supplement: supp [file Figure 4-figure supplement 2-Source Data 6.xlsx]

## Sheet: Raw data
	Label	Area	Mean	Min	Max	X	Y	Circ	IntDen	RawIntDen	AR	Round	Solidity
			RPE-BFP-Cas9 none
117	CLUAP1_KAN310-19_1.tif:0001-0048	1.279	97.508	0	538	93.079	4.938	0.817	124.692	11896	1.673	0.598	0.961	1.12357
118	CLUAP1_KAN310-19_1.tif:0002-0136	0.839	101	0	337	119.635	13.921	0.906	84.693	8080	1.307	0.765	0.952	0.763149
119	CLUAP1_KAN310-19_1.tif:0003-0149	1.363	74.623	0	464	60.265	15.226	0.935	101.685	9701	1.159	0.863	0.939	0.916251
120	CLUAP1_KAN310-19_1.tif:0004-0258	1.551	106.25	0	793	44.881	26.386	0.864	164.827	15725	1.531	0.653	0.94	1.48521
121	CLUAP1_KAN310-19_1.tif:0005-0417	1.195	63.456	0	295	67.557	42.731	0.916	75.826	7234	1.401	0.714	0.954	0.683245
122	CLUAP1_KAN310-19_1.tif:0006-0455	1.467	78.721	0	368	85.693	46.594	0.942	115.521	11021	1.019	0.981	0.936	1.04092
123	CLUAP1_KAN310-19_1.tif:0007-0471	1.415	118.711	0	864	40.828	48.261	0.848	167.982	16026	1.562	0.64	0.954	1.51364
124	CLUAP1_KAN310-19_1.tif:0008-0534	1.331	82.449	0	603	103.478	54.673	0.94	109.756	10471	1.171	0.854	0.924	0.988977
125	CLUAP1_KAN310-19_1.tif:0009-0538	1.593	85.783	0	608	28.737	55.117	0.816	136.673	13039	1.05	0.952	0.897	1.23152
126	CLUAP1_KAN310-19_1.tif:0010-0709	1.562	96.329	0	602	89.728	72.584	0.773	150.446	14353	1.625	0.616	0.869	1.35563
127	CLUAP1_KAN310-19_1.tif:0011-0835	1.541	99.272	0	604	34.055	85.527	0.913	152.962	14593	1.173	0.852	0.945	1.3783
128	CLUAP1_KAN310-19_1.tif:0012-0864	0.922	105.943	0	379	11.853	88.425	0.949	97.722	9323	1.029	0.972	0.946	0.880549
129	CLUAP1_KAN310-19_1.tif:0013-0878	1.205	51.678	0	532	100.92	89.902	0.952	62.294	5943	1.088	0.919	0.947	0.561311
130	CLUAP1_KAN310-19_1.tif:0014-0899	1.426	61.816	0	411	60.78	92.022	0.951	88.121	8407	1.116	0.896	0.954	0.794034
131	CLUAP1_KAN310-19_2.tif:0001-0081	0.996	41.442	0	244	103.25	8.279	0.914	41.267	3937	1.245	0.803	0.936	0.371846
132	CLUAP1_KAN310-19_2.tif:0002-0086	1.289	107.748	0	692	51.416	8.801	0.87	138.916	13253	1.256	0.796	0.935	1.25173
133	CLUAP1_KAN310-19_2.tif:0003-0106	1.53	78.616	0	666	81.139	10.872	0.897	120.311	11478	1.242	0.805	0.924	1.08409
134	CLUAP1_KAN310-19_2.tif:0004-0283	0.975	53.323	0	267	61.926	28.996	0.878	51.98	4959	1.057	0.946	0.964	0.468373
135	CLUAP1_KAN310-19_2.tif:0005-0295	1.279	60.475	0	425	113.991	30.212	0.877	77.335	7378	1.416	0.706	0.907	0.696846
136	CLUAP1_KAN310-19_2.tif:0006-0351	1.604	50.19	0	312	3.594	35.947	0.794	80.49	7679	1.69	0.592	0.89	0.725275
137	CLUAP1_KAN310-19_2.tif:0007-0404	1.551	80.73	0	443	47.858	41.429	0.877	125.237	11948	1.4	0.714	0.902	1.12848
138	CLUAP1_KAN310-19_2.tif:0008-0416	1.478	65.915	0	496	86.068	42.601	0.886	97.418	9294	1.179	0.849	0.966	0.87781
139	CLUAP1_KAN310-19_2.tif:0009-0523	1.31	276.984	0	1251	24.849	53.573	0.738	362.913	34623	1.652	0.605	0.865	3.27011
140	CLUAP1_KAN310-19_2.tif:0010-0530	0.922	55.261	0	239	128.518	54.281	0.949	50.973	4863	1.077	0.929	0.946	0.459306
141	CLUAP1_KAN310-19_2.tif:0011-0722	1.73	102.455	0	603	14.012	74.028	0.93	177.196	16905	1.145	0.874	0.948	1.59666
142	CLUAP1_KAN310-19_2.tif:0012-0730	1.373	59.534	0	322	92.501	74.789	0.927	81.748	7799	1.189	0.841	0.963	0.736609
143	CLUAP1_KAN310-19_2.tif:0013-0741	1.74	111.289	0	728	57.33	75.935	0.841	193.642	18474	1.513	0.661	0.927	1.74485
144	CLUAP1_KAN310-19_2.tif:0014-0894	1.824	41.414	0	202	28.005	91.493	0.826	75.532	7206	1.722	0.581	0.902	0.6806
145	CLUAP1_KAN310-19_2.tif:0015-0942	1.143	127.174	0	436	77.174	96.496	0.942	145.3	13862	1.077	0.929	0.956	1.30925
146	CLUAP1_KAN310-19_2.tif:0016-0977	1.73	54.121	0	388	40.969	100.067	0.898	93.603	8930	1.304	0.767	0.924	0.843431
147	CLUAP1_KAN310-19_3.tif:0001-0008	1.279	103.607	0	457	64.461	0.896	0.94	132.491	12640	1.152	0.868	0.938	1.19384
148	CLUAP1_KAN310-19_3.tif:0002-0171	1.331	79.827	0	747	50.367	17.517	0.979	106.265	10138	1.047	0.956	0.955	0.957525
149	CLUAP1_KAN310-19_3.tif:0003-0177	1.205	59.165	0	268	93.559	18.103	0.912	71.319	6804	1.208	0.828	0.913	0.642632
150	CLUAP1_KAN310-19_3.tif:0004-0260	1.017	43.515	0	208	109.222	26.658	0.964	44.244	4221	1.123	0.89	0.956	0.39867
151	CLUAP1_KAN310-19_3.tif:0005-0322	1.446	78.667	0	459	65.14	32.944	0.914	113.791	10856	1.303	0.768	0.958	1.02534
152	CLUAP1_KAN310-19_3.tif:0006-0332	1.551	119.034	0	616	32.068	34.024	0.959	184.659	17617	1.109	0.902	0.943	1.66391
153	CLUAP1_KAN310-19_3.tif:0007-0342	1.415	116.081	0	913	75.463	35.036	0.871	164.261	15671	1.171	0.854	0.941	1.48011
154	CLUAP1_KAN310-19_3.tif:0008-0455	0.88	57.798	0	398	116.279	46.66	0.888	50.889	4855	1.195	0.837	0.966	0.45855
155	CLUAP1_KAN310-19_3.tif:0009-0468	1.132	66.796	0	292	98.954	47.954	0.878	75.616	7214	1.484	0.674	0.964	0.681356
156	CLUAP1_KAN310-19_3.tif:0010-0517	1.258	61.033	0	299	119.036	52.946	0.925	76.769	7324	1.203	0.831	0.945	0.691745
157	CLUAP1_KAN310-19_3.tif:0011-0552	1.625	59.619	0	377	76.917	56.563	0.905	96.863	9241	1.195	0.837	0.939	0.872804
158	CLUAP1_KAN310-19_3.tif:0012-0573	1.289	45.959	0	221	17.554	58.684	0.959	59.254	5653	1.096	0.913	0.972	0.533921
159	CLUAP1_KAN310-19_3.tif:0013-0764	1.31	68.12	0	303	86.297	78.238	0.992	89.253	8515	1.073	0.932	0.951	0.804234
160	CLUAP1_KAN310-19_3.tif:0014-0882	1.268	69.355	0	327	90.702	90.388	0.856	87.964	8392	1.42	0.704	0.934	0.792617
161	CLUAP1_KAN310-19_3.tif:0015-0895	1.195	78.123	0	294	28.58	91.638	0.853	93.351	8906	1.592	0.628	0.916	0.841164
										10587.7				1
			RPE-BFP-Cas9 sgIFT52
162	CLUAP1_KAN310-20-1.tif:0001-0060	0.996	21.632	0	249	85.289	6.207	1	21.54	2055	1.094	0.914	0.945	0.194093
163	CLUAP1_KAN310-20-1.tif:0002-0201	1.017	76.773	0	308	53.93	20.533	0.875	78.058	7447	1.188	0.842	0.937	0.703363
164	CLUAP1_KAN310-20-1.tif:0003-0271	0.839	28.85	0	125	84.466	27.835	0.906	24.192	2308	1.074	0.931	0.952	0.217989
165	CLUAP1_KAN310-20-1.tif:0004-0324	1.174	59.312	0	254	41.994	33.161	0.771	69.631	6643	1.241	0.806	0.882	0.627426
166	CLUAP1_KAN310-20-1.tif:0005-0348	0.86	84.427	0	461	110.258	35.681	0.962	72.566	6923	1.136	0.881	0.953	0.653871
167	CLUAP1_KAN310-20-1.tif:0006-0435	1.457	71.734	0	417	41.135	44.59	0.896	104.515	9971	1.516	0.66	0.969	0.941752
168	CLUAP1_KAN310-20-1.tif:0007-0463	1.059	28.317	0	93	88.255	47.428	0.99	29.978	2860	1.201	0.833	0.948	0.270124
169	CLUAP1_KAN310-20-1.tif:0008-0551	1.289	29.415	0	120	69.849	56.411	0.921	37.923	3618	1.115	0.897	0.939	0.341717
170	CLUAP1_KAN310-20-1.tif:0009-0558	0.849	56.198	0	263	115.977	57.104	0.95	47.713	4552	1.132	0.883	0.964	0.429932
171	CLUAP1_KAN310-20-1.tif:0010-0613	1.279	52.918	0	419	61.054	62.774	0.888	67.671	6456	1.248	0.801	0.938	0.609764
172	CLUAP1_KAN310-20-1.tif:0011-0756	1.059	67.812	0	302	53.223	77.459	0.941	71.79	6849	1.138	0.879	0.962	0.646882
173	CLUAP1_KAN310-20-1.tif:0012-0809	0.954	31.022	0	159	122.269	82.873	0.948	29.59	2823	1.26	0.793	0.963	0.26663
174	CLUAP1_KAN310-20-1.tif:0013-0938	1.237	80.458	0	438	66.672	96.104	0.909	99.515	9494	1.273	0.786	0.933	0.8967
175	CLUAP1_KAN310-20_2.tif:0001-0072	1.122	72.383	0	211	26.374	7.429	0.953	81.182	7745	1.14	0.877	0.947	0.731508
176	CLUAP1_KAN310-20_2.tif:0002-0181	1.792	53.532	0	287	58.659	18.548	0.887	95.951	9154	1.502	0.666	0.942	0.864587
177	CLUAP1_KAN310-20_2.tif:0003-0259	1.247	78.588	0	290	108.473	26.521	0.956	98.026	9352	1.069	0.935	0.96	0.883288
178	CLUAP1_KAN310-20_2.tif:0004-0379	1.384	56.871	0	161	17.865	38.84	0.909	78.687	7507	1.235	0.809	0.967	0.70903
179	CLUAP1_KAN310-20_2.tif:0005-0424	1.52	53.924	0	291	60.079	43.422	0.95	81.958	7819	1.194	0.838	0.945	0.738498
180	CLUAP1_KAN310-20_2.tif:0006-0455	1.205	15.574	0	112	129.28	46.673	0.912	18.773	1791	1.252	0.799	0.924	0.169158
181	CLUAP1_KAN310-20_2.tif:0007-0459	1.363	73.969	0	279	99.517	47.013	0.909	100.794	9616	1.513	0.661	0.952	0.908223
182	CLUAP1_KAN310-20_2.tif:0008-0599	1.761	104.256	0	434	45.677	61.36	0.924	183.59	17515	1.245	0.803	0.949	1.65428
183	CLUAP1_KAN310-20_2.tif:0009-0627	0.996	50.663	0	215	103.35	64.237	0.763	50.449	4813	1.41	0.709	0.856	0.454584
184	CLUAP1_KAN310-20_2.tif:0010-0760	1.53	62.151	0	353	87.672	77.765	0.884	95.112	9074	1.235	0.81	0.942	0.857031
185	CLUAP1_KAN310-20_2.tif:0011-0885	1.593	60.336	0	295	22.481	90.662	0.897	96.129	9171	1.399	0.715	0.962	0.866193
186	CLUAP1_KAN310-20_2.tif:0012-0899	1.467	57.686	0	260	45.913	92.134	0.87	84.651	8076	1.461	0.684	0.94	0.762771
187	CLUAP1_KAN310-20_2.tif:0013-1019	1.279	53.311	0	453	48.693	104.298	0.903	68.174	6504	1.394	0.717	0.935	0.614297
188	CLUAP1_KAN310-20_3.tif:0001-0084	1.101	23.495	0	90	81.821	8.588	0.843	25.859	2467	1.442	0.694	0.901	0.233006
189	CLUAP1_KAN310-20_3.tif:0002-0126	1.08	35.99	0	179	65.703	12.915	0.852	38.856	3707	1.395	0.717	0.896	0.350123
190	CLUAP1_KAN310-20_3.tif:0003-0227	1.352	75.403	0	262	56.172	23.228	0.939	101.957	9727	1.101	0.908	0.963	0.918707
191	CLUAP1_KAN310-20_3.tif:0004-0286	1.143	51.927	0	172	50.061	29.294	0.971	59.327	5660	1.211	0.826	0.965	0.534582
192	CLUAP1_KAN310-20_3.tif:0005-0310	1.352	97.837	0	568	43.007	31.711	0.966	132.292	12621	1.028	0.972	0.959	1.19204
193	CLUAP1_KAN310-20_3.tif:0006-0331	1.373	66.885	0	390	32.696	33.964	0.845	91.842	8762	1.369	0.73	0.939	0.827563
194	CLUAP1_KAN310-20_3.tif:0007-0352	0.849	44.185	0	248	107.741	36.048	0.95	37.515	3579	1.178	0.849	0.953	0.338033
195	CLUAP1_KAN310-20_3.tif:0008-0397	1.017	22.402	0	114	119.702	40.684	0.892	22.777	2173	1.234	0.811	0.915	0.205238
196	CLUAP1_KAN310-20_3.tif:0009-0451	1.384	69.091	0	268	77.169	46.133	0.874	95.595	9120	1.414	0.707	0.946	0.861376
197	CLUAP1_KAN310-20_3.tif:0010-0463	1.143	45.248	0	375	89.691	47.455	0.875	51.697	4932	1.448	0.691	0.928	0.465823
198	CLUAP1_KAN310-20_3.tif:0011-0605	1.048	55.72	0	183	25.801	61.99	0.932	58.405	5572	1.089	0.918	0.957	0.52627
199	CLUAP1_KAN310-20_3.tif:0012-0626	1.446	83.978	0	465	41.65	64.143	0.965	121.474	11589	1.091	0.917	0.962	1.09457
200	CLUAP1_KAN310-20_3.tif:0013-0771	1.426	46.618	0	204	64.409	78.964	0.951	66.455	6340	1.073	0.932	0.954	0.598807
201	CLUAP1_KAN310-20_3.tif:0014-0907	1.31	250.976	0	637	53.193	92.848	0.851	328.837	31372	1.528	0.654	0.919	2.96306
202	CLUAP1_KAN310-20_3.tif:0015-0935	1.478	61.95	0	355	23.446	95.745	0.899	91.559	8735	1.198	0.835	0.928	0.825013
203	CLUAP1_KAN310-20_3.tif:0016-1001	1.059	63.812	0	200	48.501	102.486	0.972	67.556	6445	1.085	0.922	0.967	0.608725
										7450.88				0.703729

## Sheet: IF condition
Exp. number	Cell line	Culture condition	Fixation condition	rabbit-Alexa488	mouse IgG1-Alexa568	mouse IgG2b-Alexa647	Nuclear stain	Date	Replicate
KAN310-19	RPE-BFP-Cas9		Fixed with 4% PFA/serum starvation for 24 hours	CLUAP1, 17470-1-AP, Proteintech, 1:500	CEP170, Invitrogen, 41-3200, 1:1000	Ac-Tub, 6B-11, SIGMA, 1:2000	DAPI
KAN310-20	RPE-BFP-Cas9 sgIFT52#1 (post-Cre)		Fixed with 4% PFA/serum starvation for 24 hours	CLUAP1, 17470-1-AP, Proteintech, 1:500	CEP170, Invitrogen, 41-3200, 1:1000	Ac-Tub, 6B-11, SIGMA, 1:2000	DAPI
