# Supplementary figures and images for: A hierarchical pathway for assembly of the distal appendages that organize primary cilia
Source: eLife journal article supplement (doi:10.7554/elife.85999), 2025-01-30

Figure 4-figure supplement 2A\_IFT52

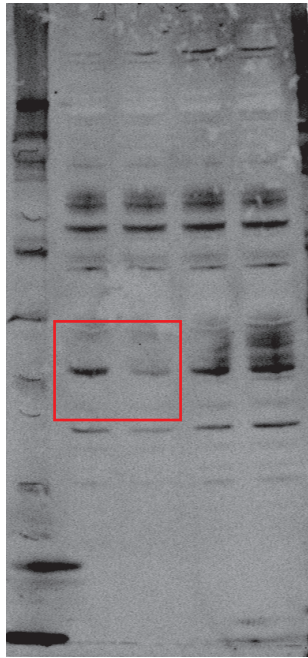

Figure 4-figure supplement 2A\_Tubulin

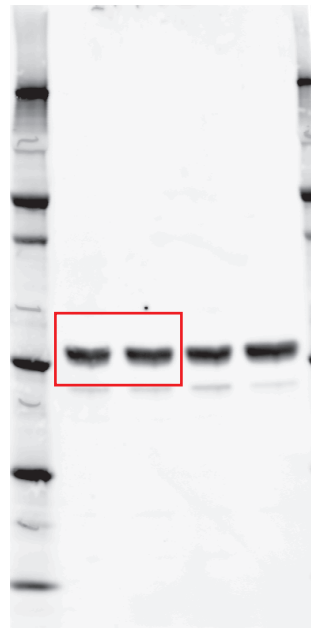

Supplement: supp [file Figure 4-figure supplement 2-Source Data 2.pdf › Figure 4-figure supplement 2-Source Data/Figure 4-figure supplement 2-Source Data 2.pdf]

**A**

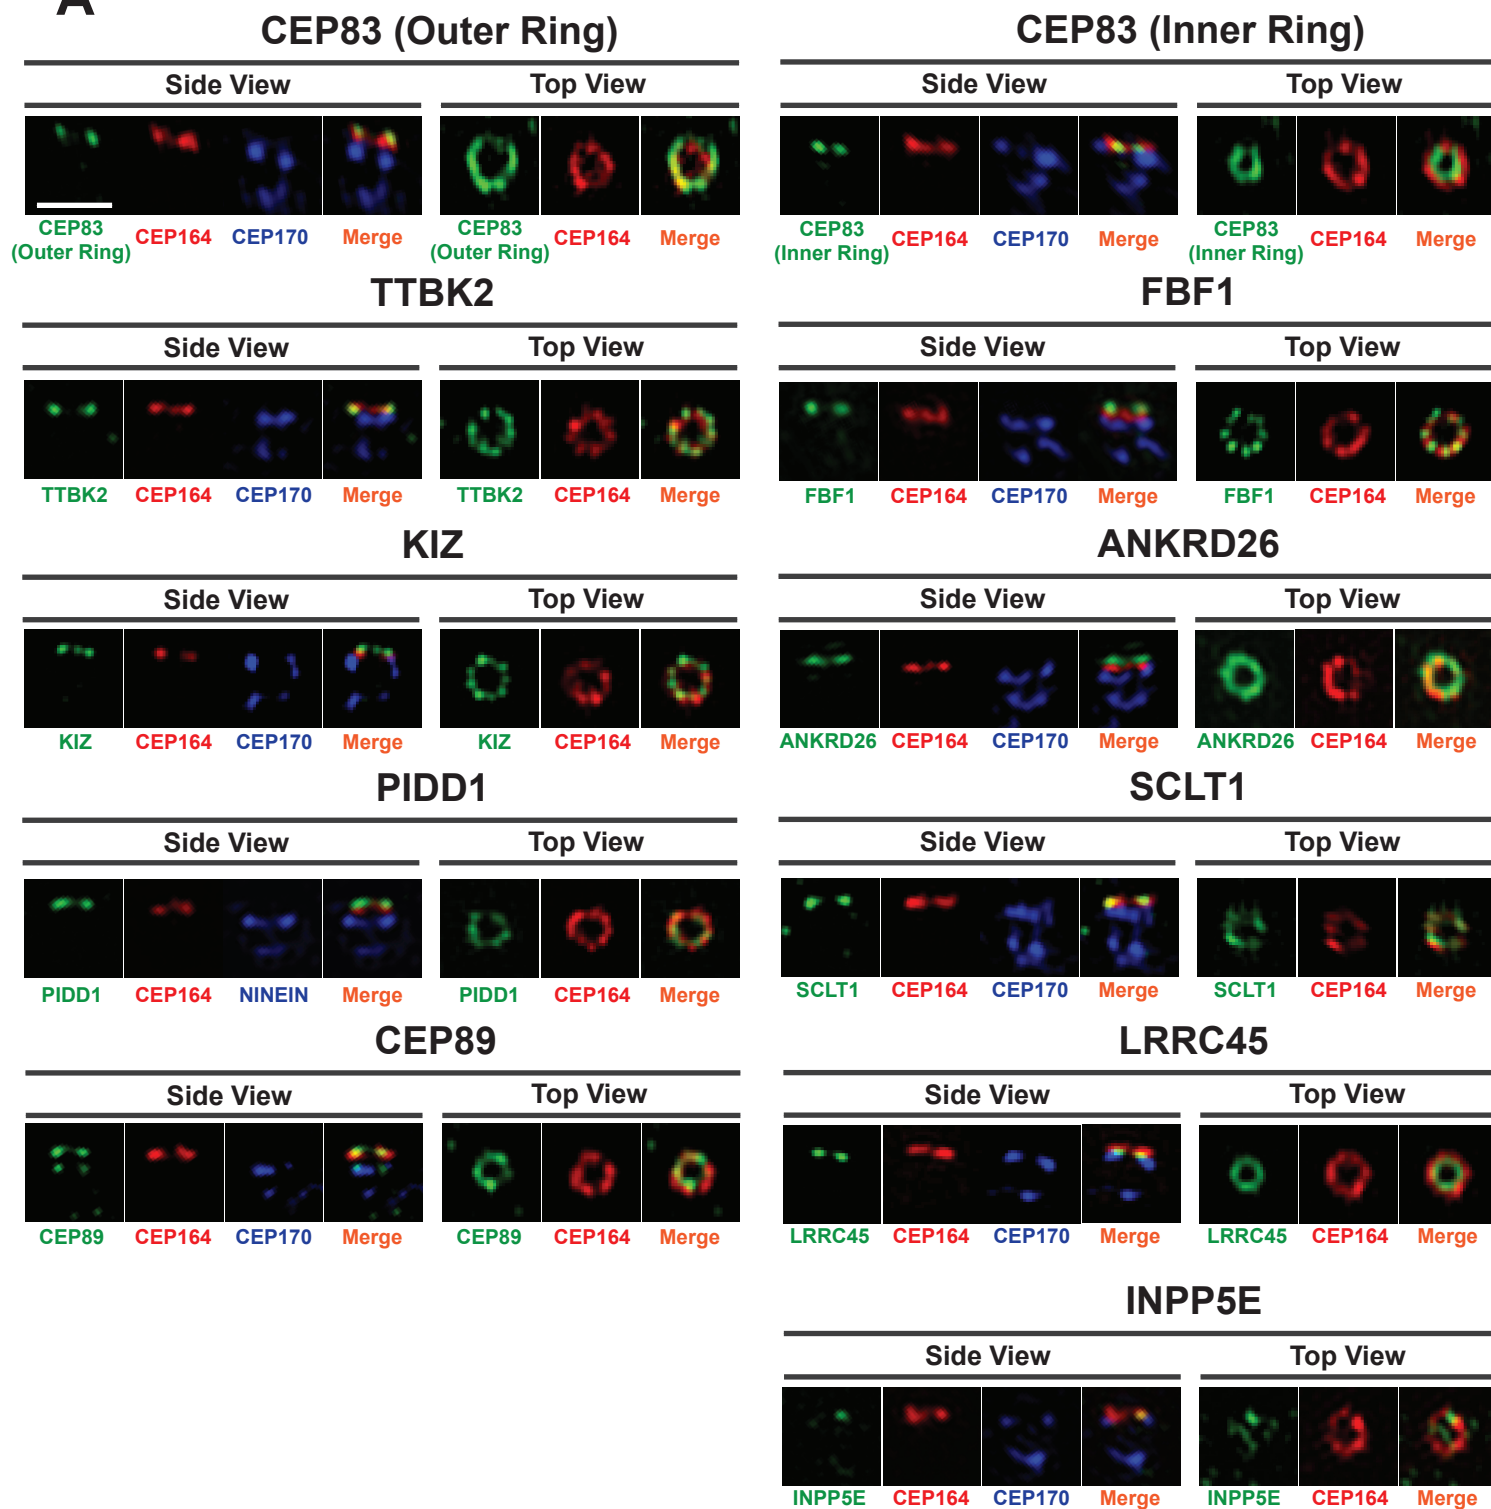

Kanie et al., Figure 1-figure supplement 1

Supplement: supp [file elife_poa_e85999_Figure_1_figure_supplement_1.pdf › elife_poa_e85999_Figure_1_figure_supplement_1.pdf]

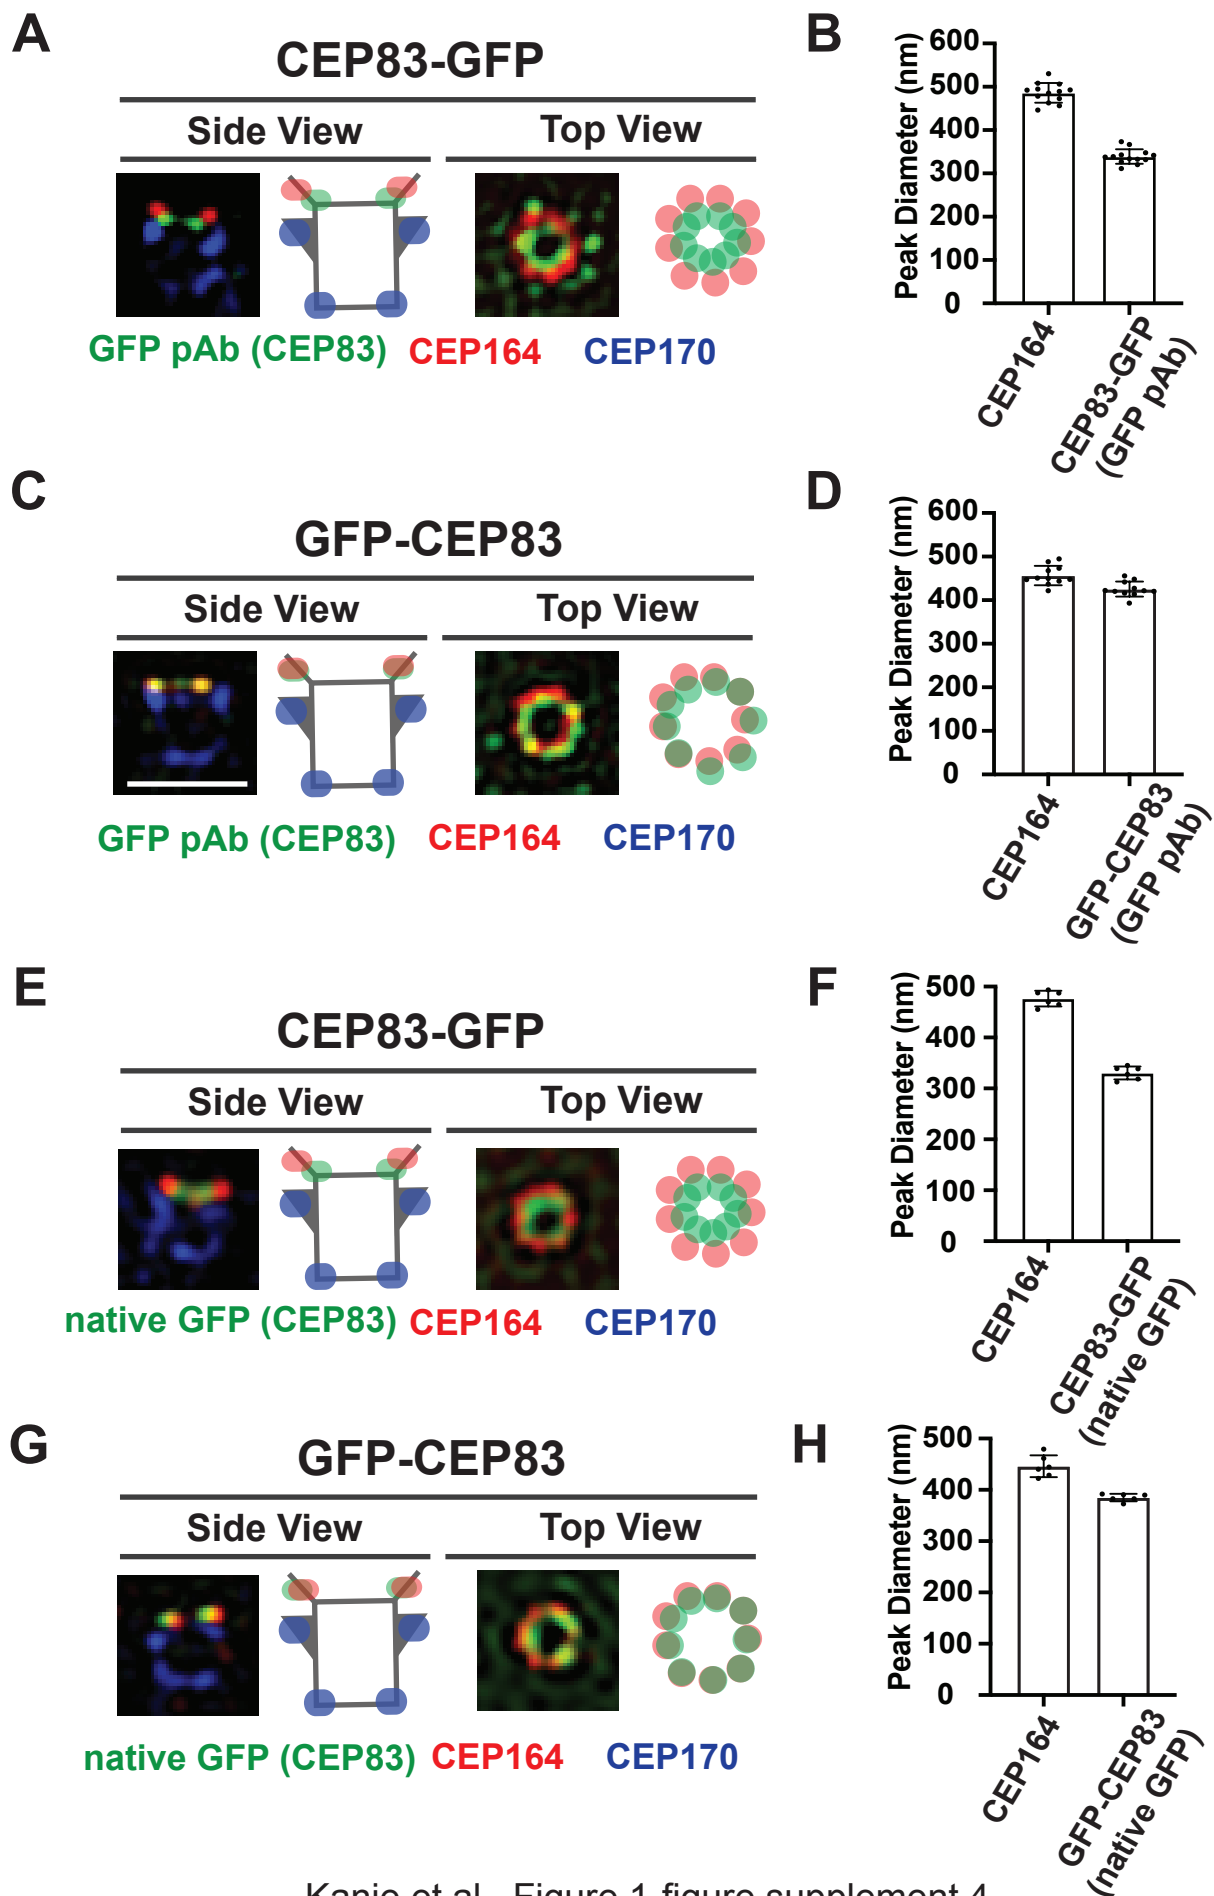

Supplement: supp [file elife_poa_e85999_Figure_1_figure_supplement_4.pdf › elife_poa_e85999_Figure_1_figure_supplement_4.pdf]

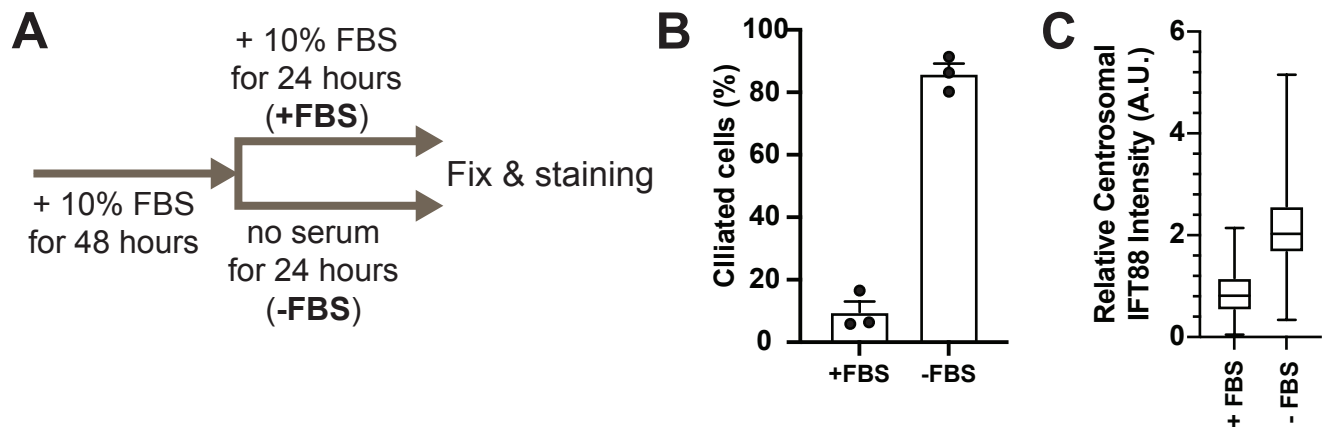

Kanie et al., Figure 1-figure supplement 5

Supplement: supp [file elife_poa_e85999_Figure_1_figure_supplement_5.pdf › elife_poa_e85999_Figure_1_figure_supplement_5.pdf]

knockouts

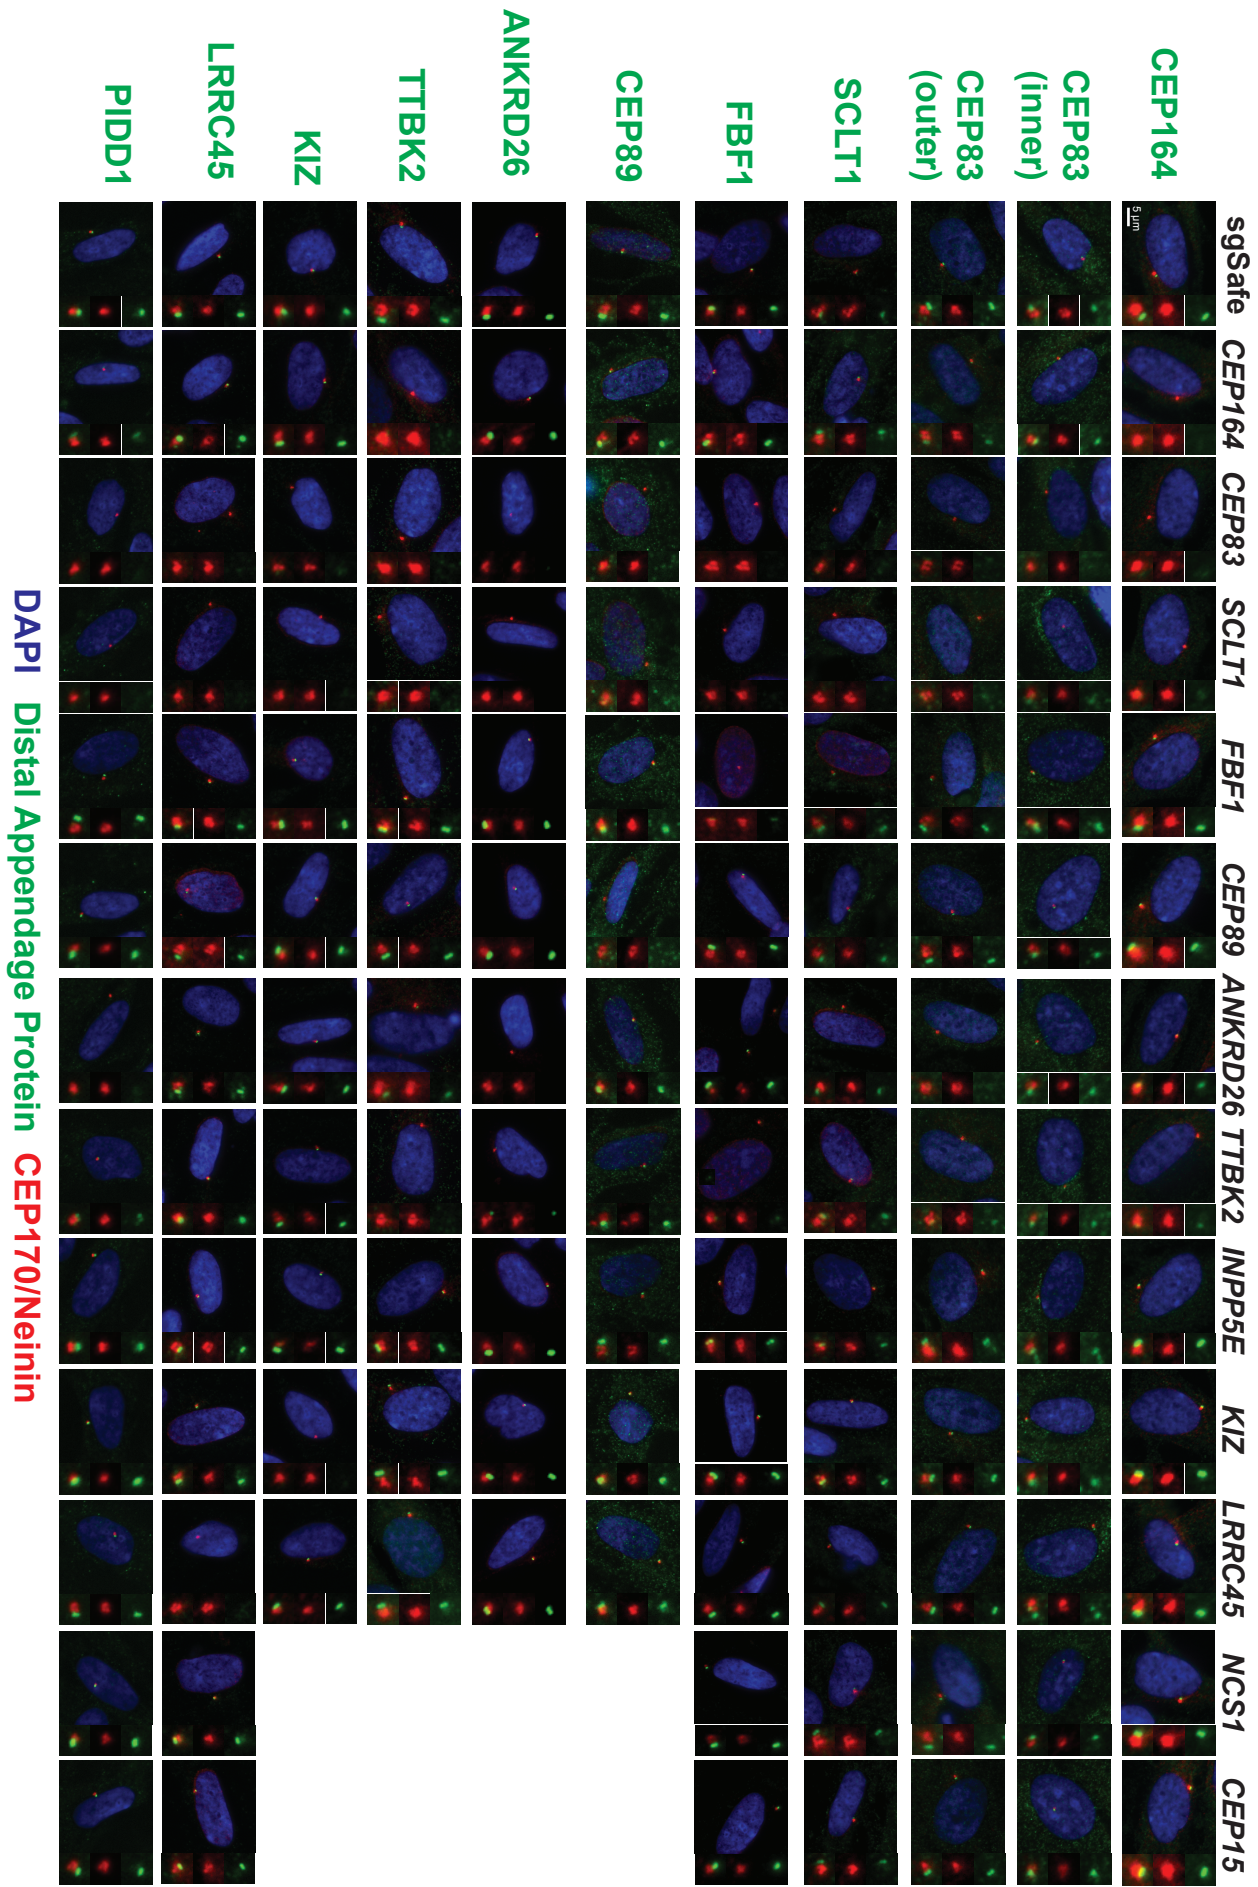

Supplement: supp [file elife_poa_e85999_Figure_2_figure_supplement_1.pdf › elife_poa_e85999_Figure_2_figure_supplement_1.pdf]

**A**

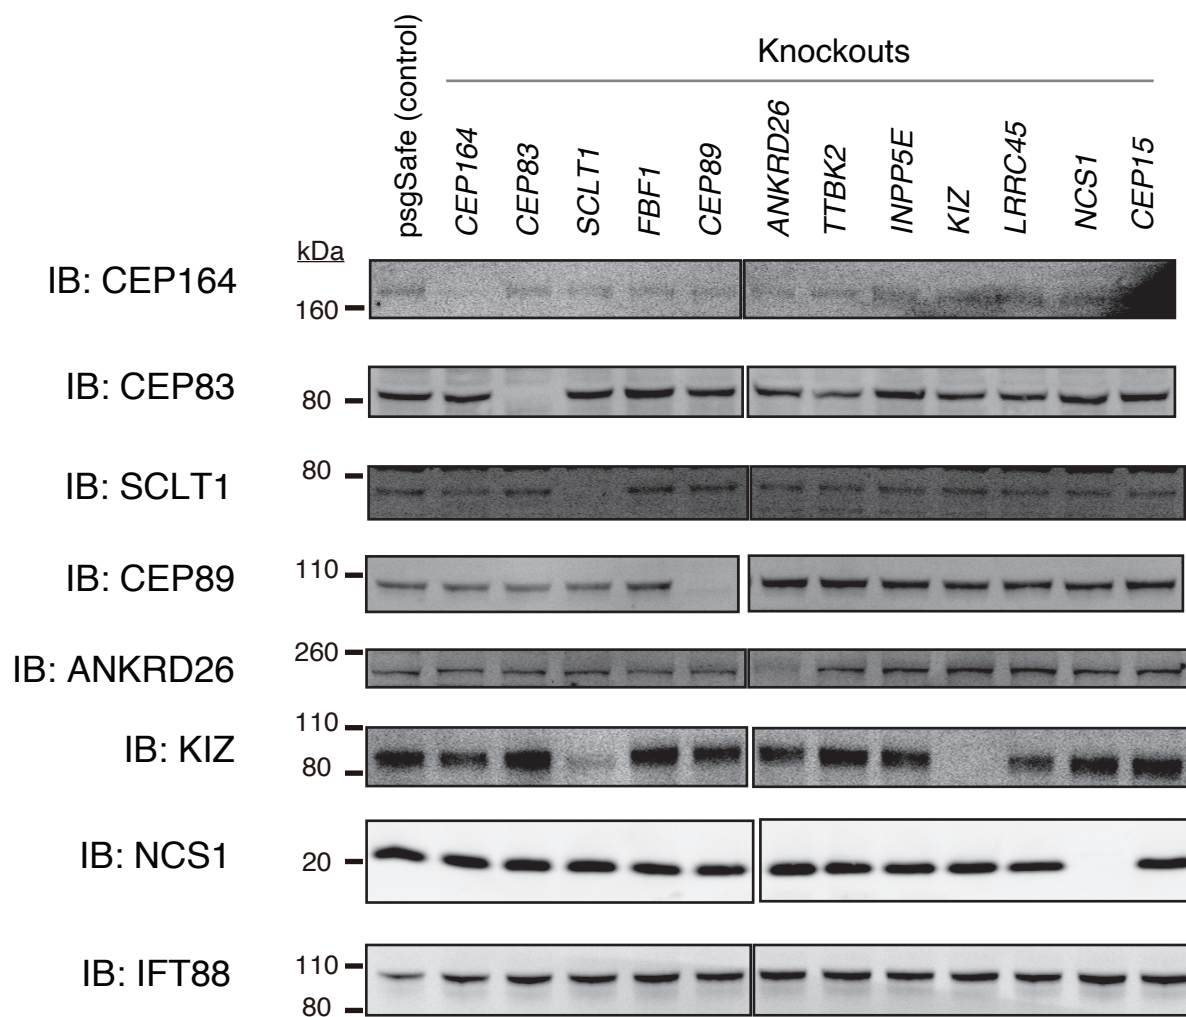

Kanie et al., Figure 2-figure supplement 2

Supplement: supp [file elife_poa_e85999_Figure_2_figure_supplement_2.pdf › elife_poa_e85999_Figure_2_figure_supplement_2.pdf]

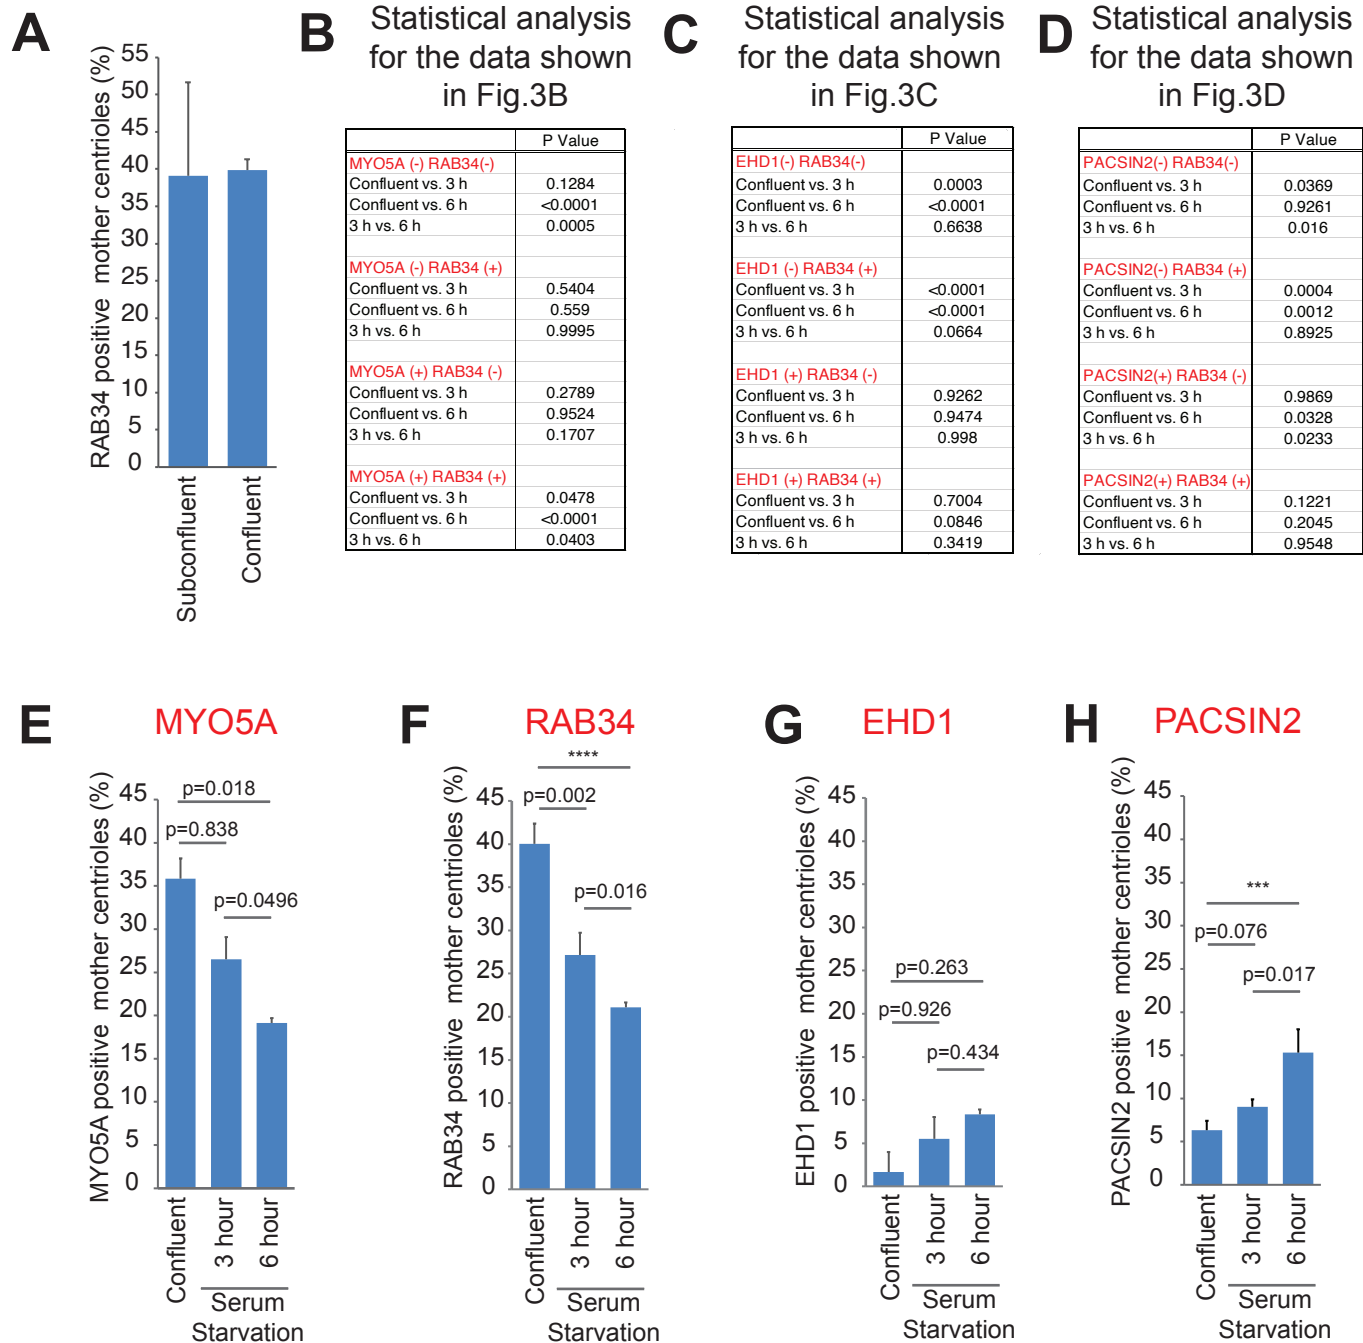

Kanie et al., Figure 3-figure supplement 2

Supplement: supp [file elife_poa_e85999_Figure_3_figure_supplement_2.pdf › elife_poa_e85999_Figure_3_figure_supplement_2.pdf]

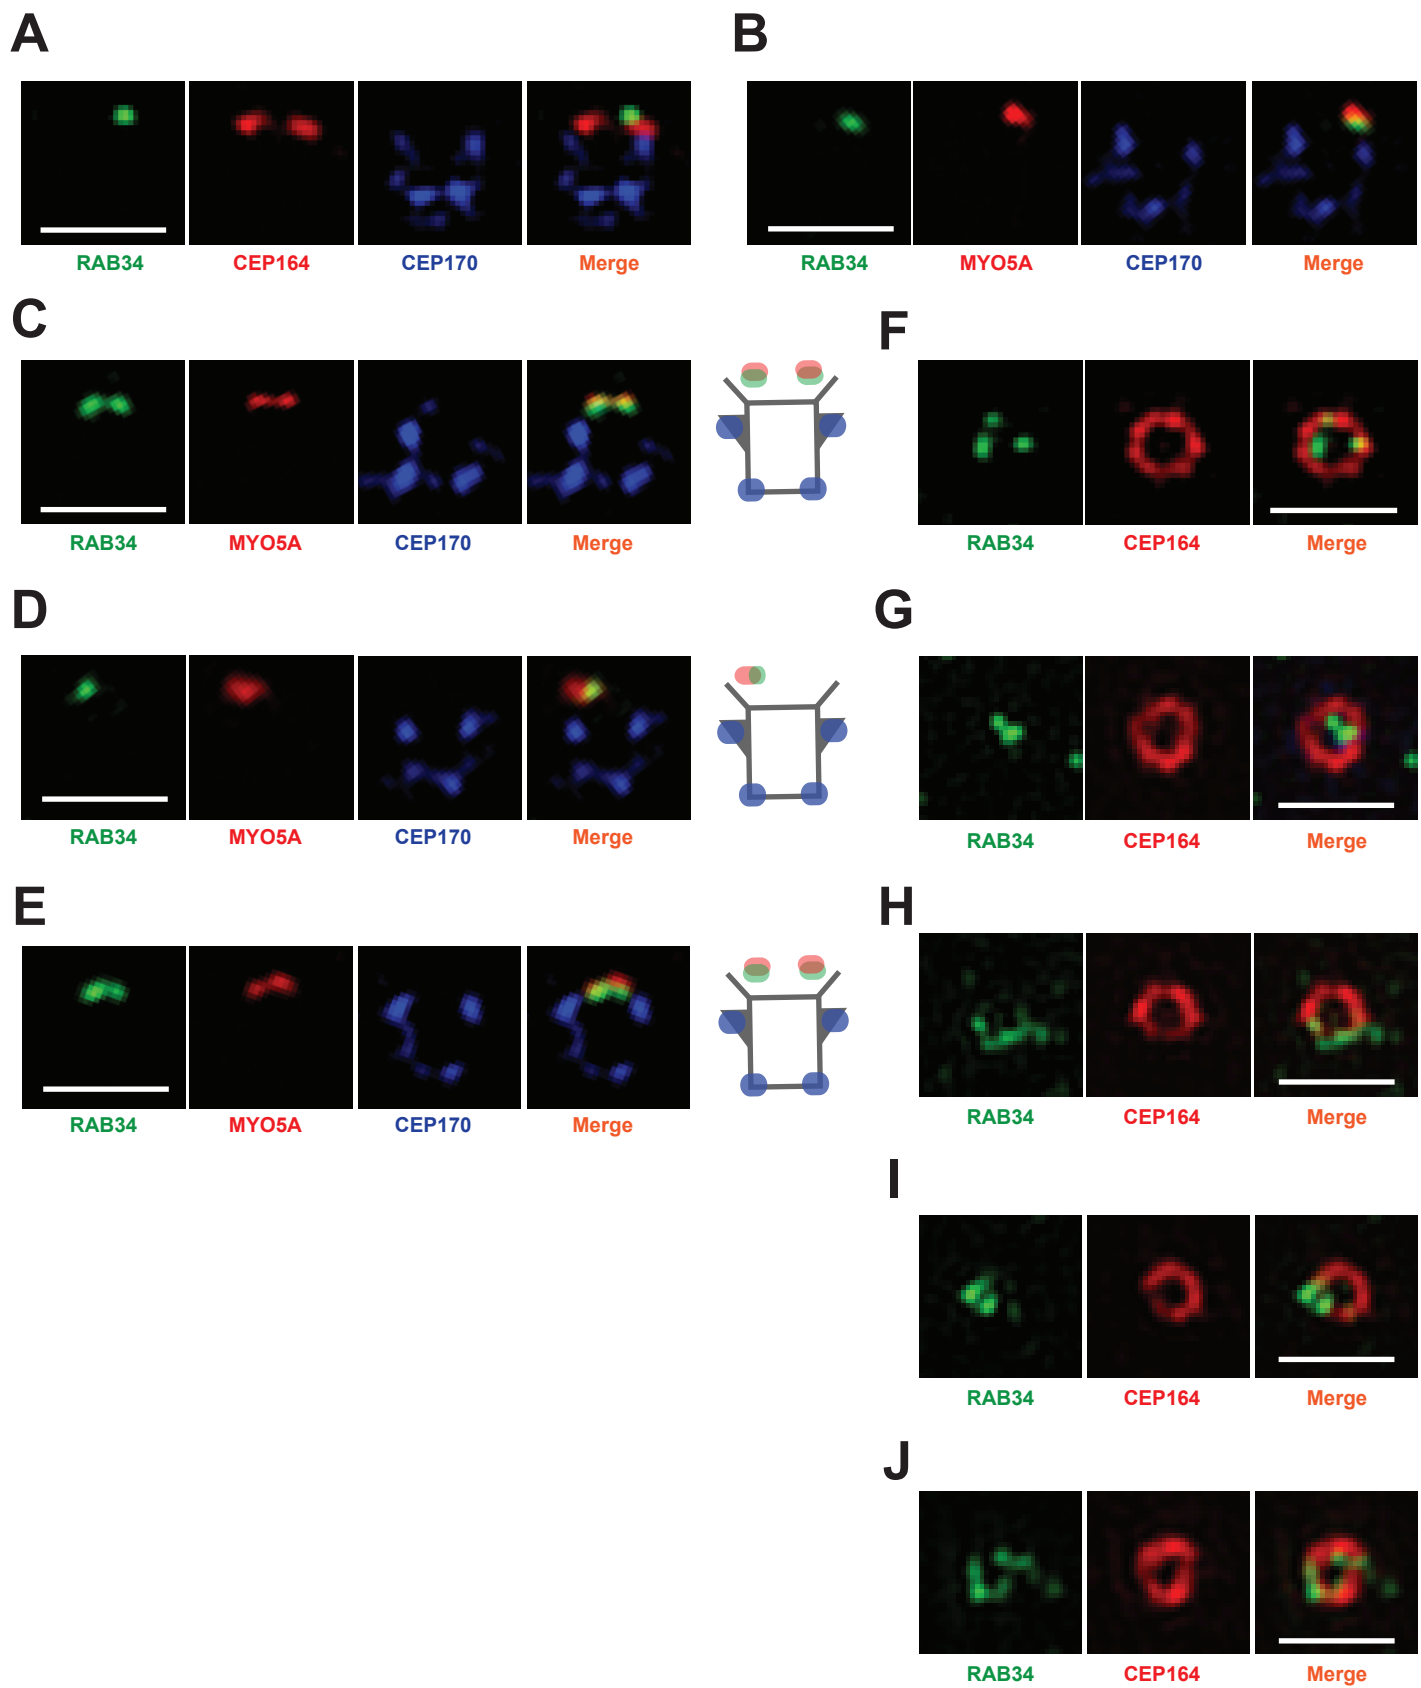

Kanie et al., Figure 3-figure supplement 3

Supplement: supp [file elife_poa_e85999_Figure_3_figure_supplement_3.pdf › elife_poa_e85999_Figure_3_figure_supplement_3.pdf]

**A**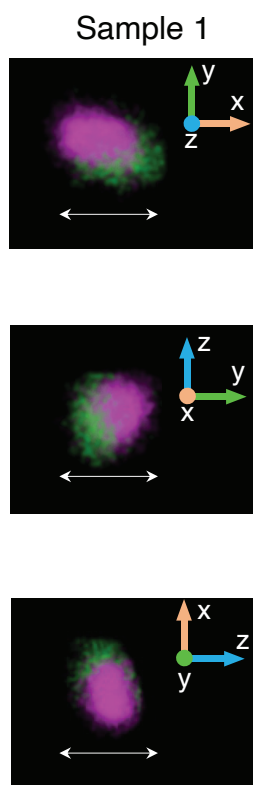**B**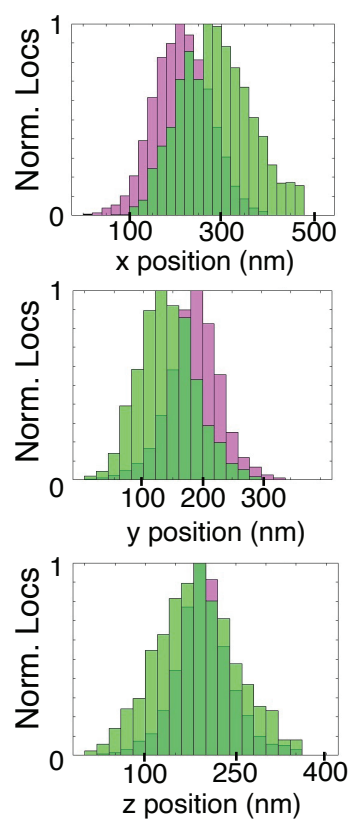**C**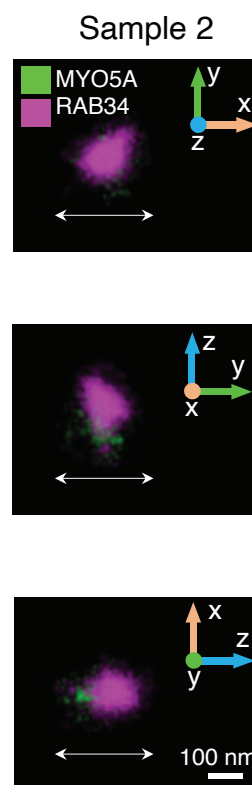**D**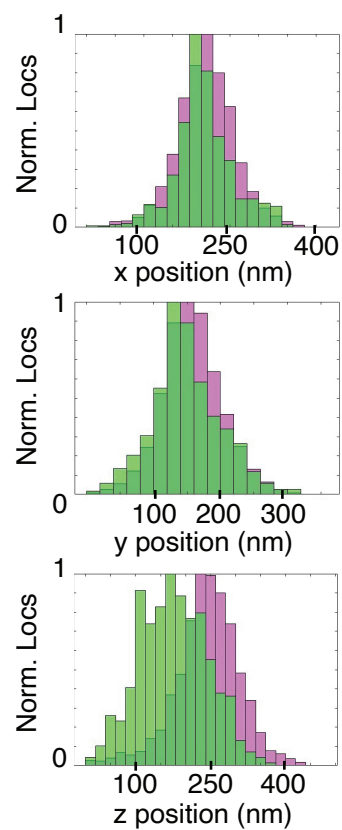

Kanie et al., Figure 3-figure supplement 4

Supplement: supp [file elife_poa_e85999_Figure_3_figure_supplement_4.pdf › elife_poa_e85999_Figure_3_figure_supplement_4.pdf]

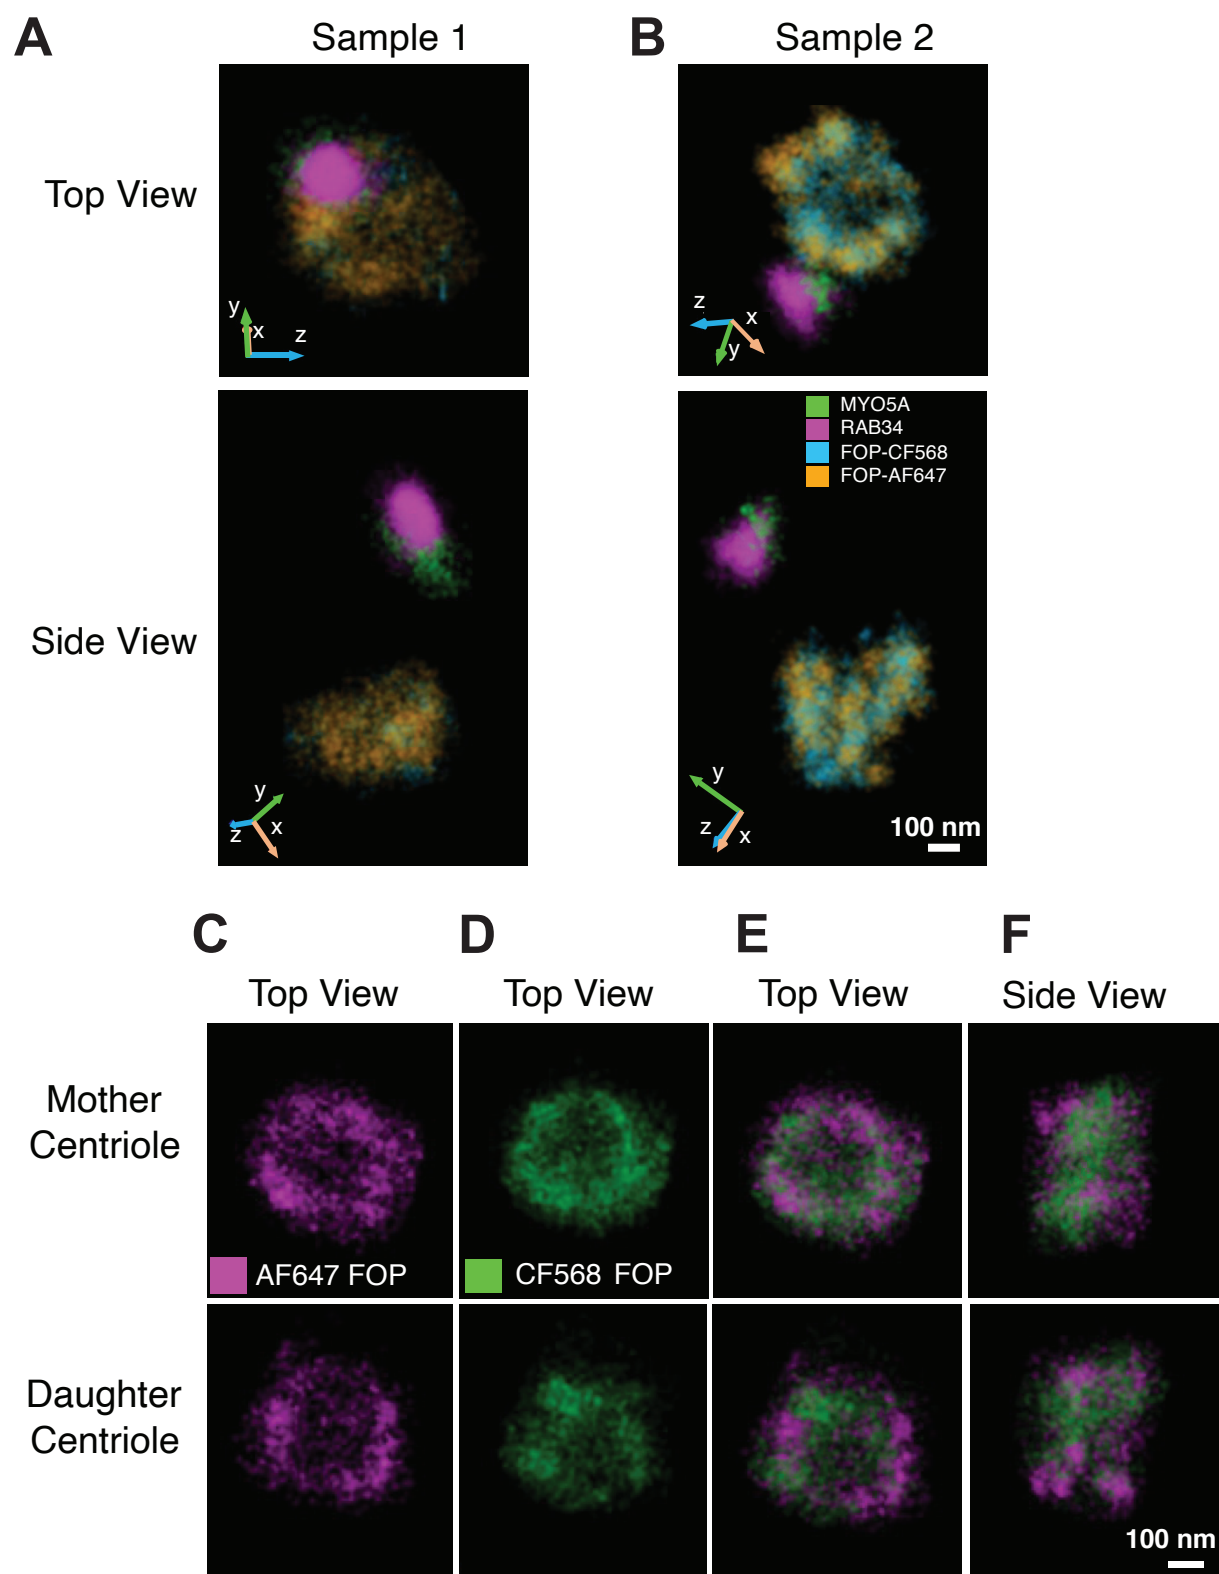

Kanie et al., Figure 3-figure supplement 5

Supplement: supp [file elife_poa_e85999_Figure_3_figure_supplement_5.pdf › elife_poa_e85999_Figure_3_figure_supplement_5.pdf]

**A**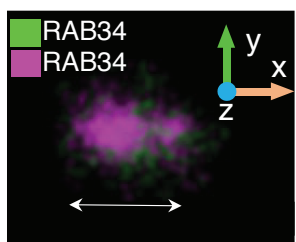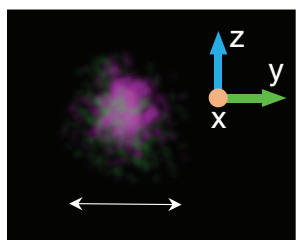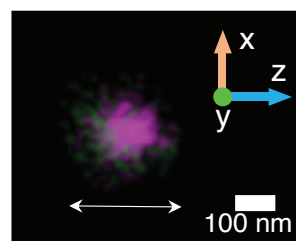**B**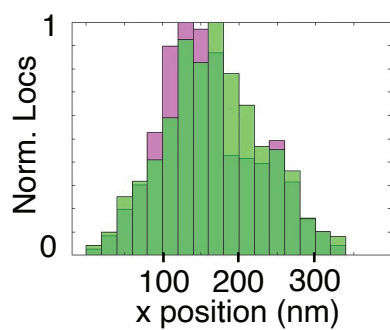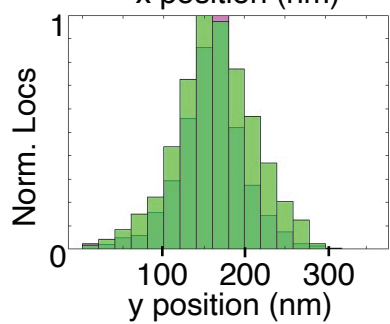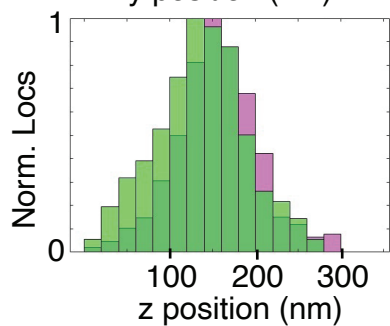**C**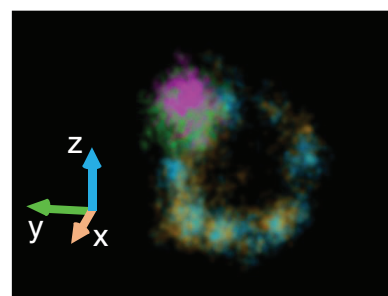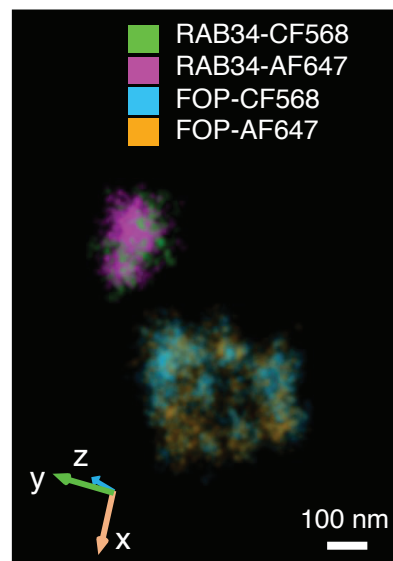

Kanie et al., Figure 3-figure supplement 6

Supplement: supp [file elife_poa_e85999_Figure_3_figure_supplement_6.pdf › elife_poa_e85999_Figure_3_figure_supplement_6.pdf]

A

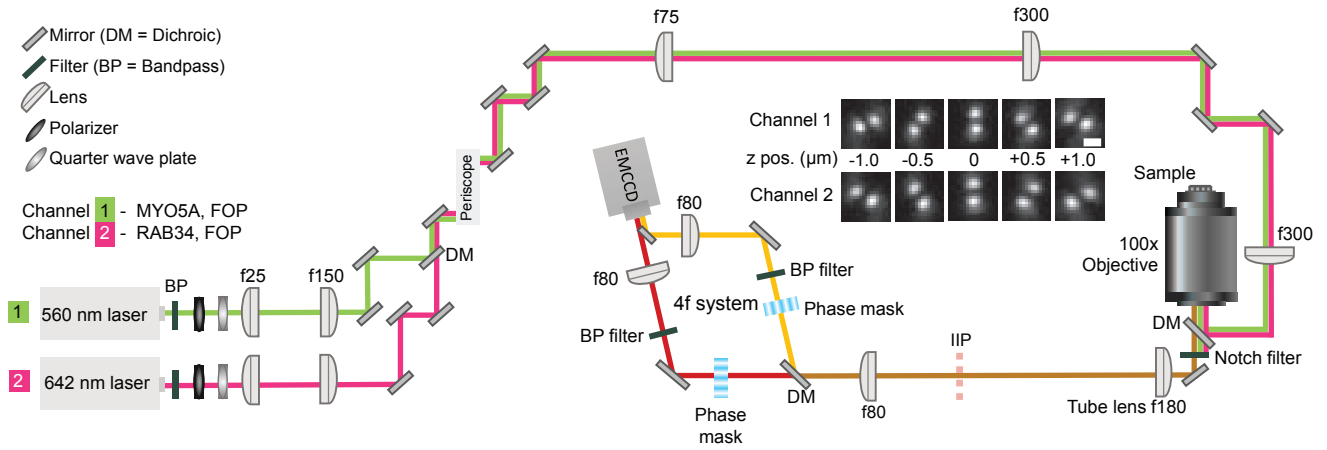

Kanie et al., Figure 3-figure supplement 7

Supplement: supp [file elife_poa_e85999_Figure_3_figure_supplement_7.pdf › elife_poa_e85999_Figure_3_figure_supplement_7.pdf]

**A**

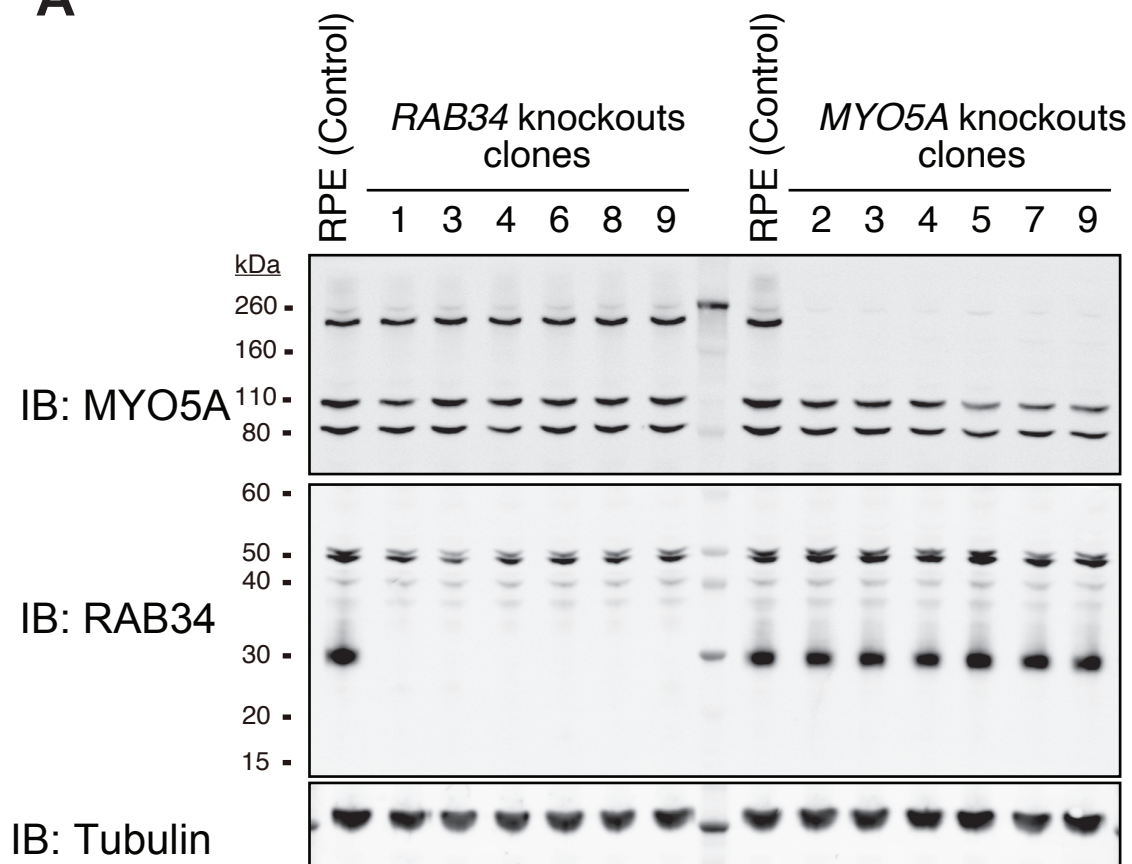

Kanie et al., Figure 4-figure supplement 1

Supplement: supp [file elife_poa_e85999_Figure_4_figure_supplement_1.pdf › elife_poa_e85999_Figure_4_figure_supplement_1.pdf]

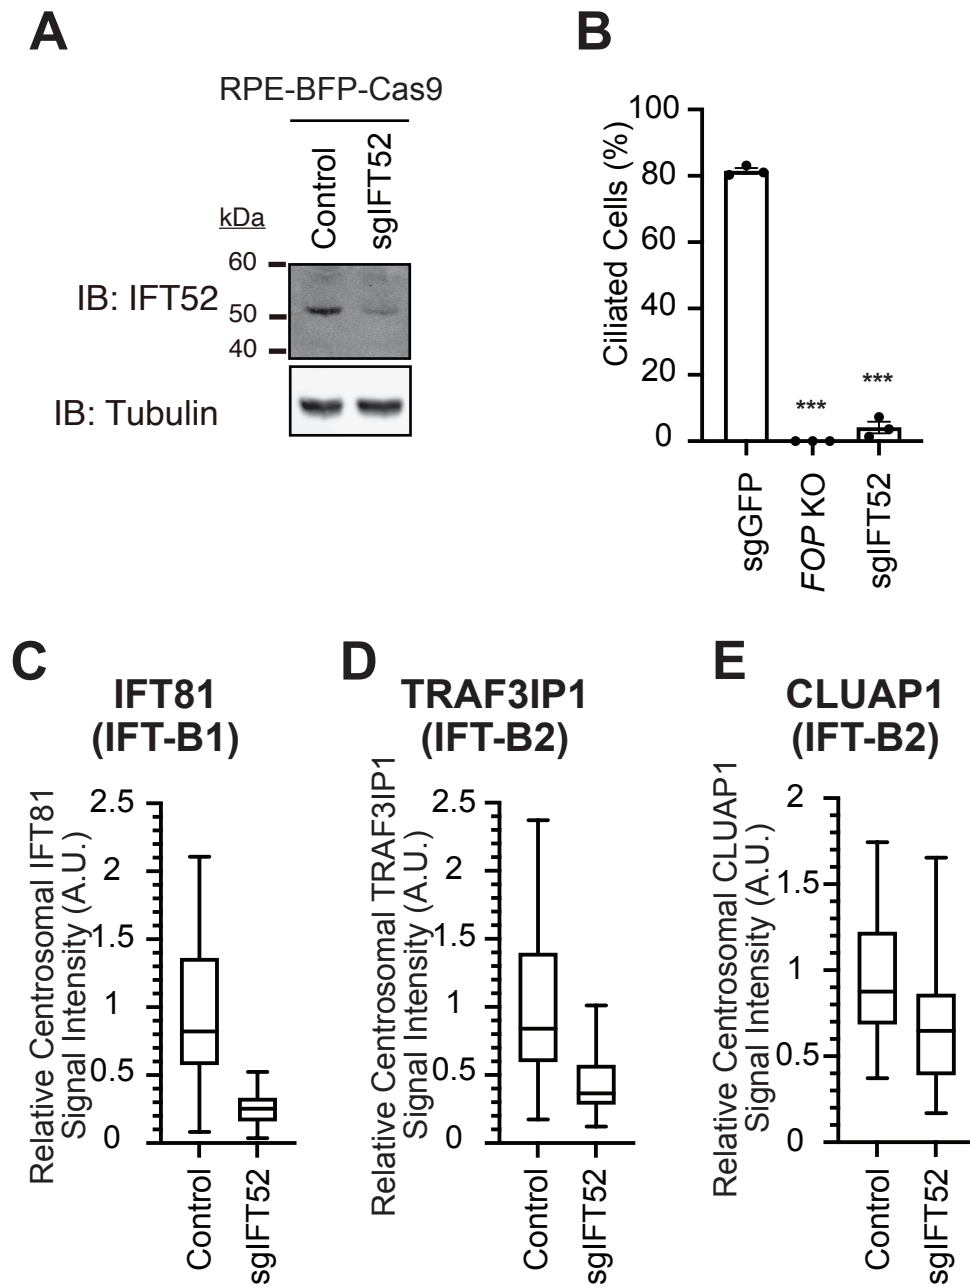

Kanie et al., Figure 4-figure supplement 2

Supplement: supp [file elife_poa_e85999_Figure_4_figure_supplement_2.pdf › elife_poa_e85999_Figure_4_figure_supplement_2.pdf]

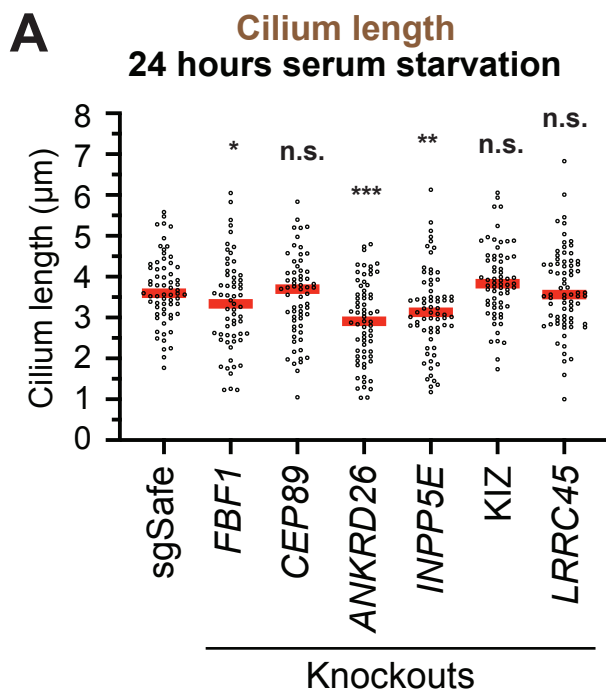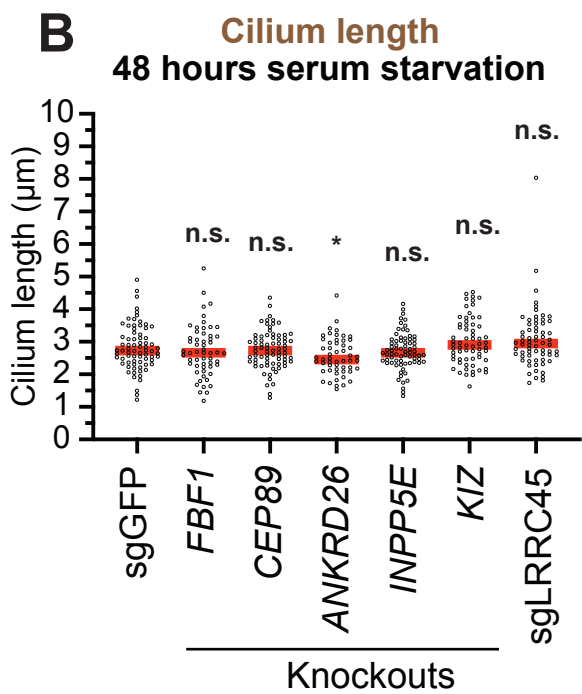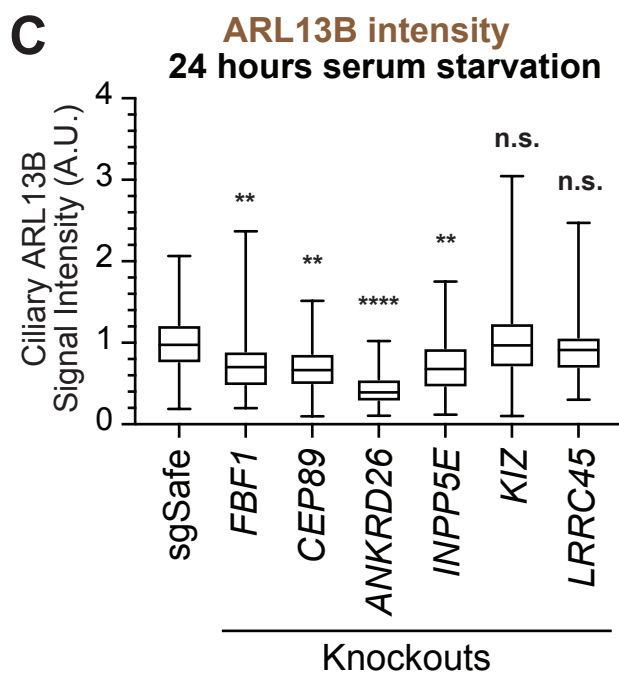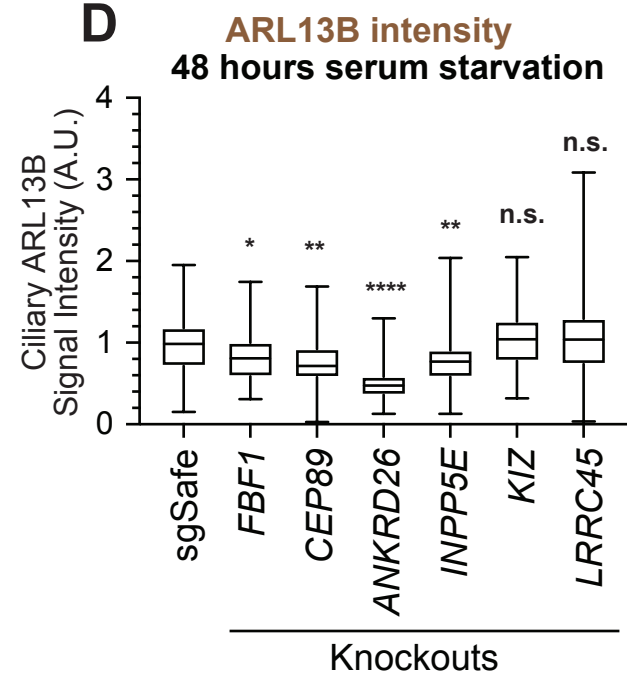

Supplement: supp [file elife_poa_e85999_Figure_5_figure_supplement_1.pdf › elife_poa_e85999_Figure_5_figure_supplement_1.pdf]
